# Supplementary material
Source: HighWire-hosted journal article supplement (https://svn.bmj.com/content/svn-2023-002717)
Supplement: inline-supplementary-material-1 [file inline-supplementary-material-1.pdf]

| Sheet number | Sheet name        | Page    | Table                                                                                                                                    |
|--------------|-------------------|---------|------------------------------------------------------------------------------------------------------------------------------------------|
| 1            | Table.of. content | /       | Table.of. content                                                                                                                        |
| 2            | Table. S1         | 1-13    | Table. S1:Details of data sources in this study                                                                                          |
| 3            | Table. S2         | 14-199  | Table. S2. Mendelian Randomization result for gut microbiome to stoke in EAS                                                             |
| 4            | Table. S3         | 200-252 | Table. S3. Mendelian Randomization result for gut microbiome to stoke in EU                                                              |
| 5            | Table. S4         | 53      | Table. S4. positive control for the causality of species Bacteroides pectinophilus to CES                                                |
| 6            | Table. S5         | 254     | Table. S5. Comparison of the causal effect estimates for Species Bacteroides pectinophilus on GIGASTROKE and MEGASTROKE subtypes         |
| 7            | Table. S6         | 255-256 | Table. S6. The comparison of the results betweenv our work and Meng’ s positive result                                                   |
| 8            | Table. S7         | 257-258 | Table. S7. The results of same IVs selected by Meng and different outcome data (MEGASTROKE and GIGASTROKE)                               |
| 9            | Table. S8         | 259-264 | Table. S8. The negative control of our analysis with Meng’ s study                                                                       |
| 10           | Table. S9         | 265-266 | Table. S9a. The association results of species Bacteroides pectinophilus’ s IVs Table. S9b. The association results of class Negativicut |
| 11           | Table. S10        | 267-471 | Table. S10. Mendelian Randomization result for stroke to gut microbiome in EAS                                                           |
| 12           | Table. S11        | 472-560 | Table. S11. Mendelian Randomization result for stroke to gut microbiome in EU                                                            |

Table.S1:Details of data in this study

| Trait name                               | Classification | No. of SNPs | Ancestry | Sample size | Significance | n control | Consortium | Source                                                                                                              |
|------------------------------------------|----------------|-------------|----------|-------------|--------------|-----------|------------|---------------------------------------------------------------------------------------------------------------------|
| c_Bacilli                                | class          | 64          | EAS      | 2, 545      | NA           | NA        | BGI        | https://ftp.cngh.org/pub/CNSA/data2/CNP0000794/microbiome/c_Bacilli.assoc.summary.7z                                |
| c_Betaproteobacteria                     | class          | 35          | EAS      | 2, 545      | NA           | NA        | BGI        | https://ftp.cngh.org/pub/CNSA/data2/CNP0000794/microbiome/c_Betaproteobacteria.assoc.summary.7z                     |
| c_Negativicutes                          | class          | 31          | EAS      | 2, 545      | NA           | NA        | BGI        | https://ftp.cngh.org/pub/CNSA/data2/CNP0000794/microbiome/c_Negativicutes.assoc.summary.7z                          |
| f_Actinomycetaceae                       | family         | 58          | EAS      | 2, 545      | NA           | NA        | BGI        | https://ftp.cngh.org/pub/CNSA/data2/CNP0000794/microbiome/f_Actinomycetaceae.assoc.summary.7z                       |
| f_Aerococcaceae                          | family         | 37          | EAS      | 2, 545      | NA           | NA        | BGI        | https://ftp.cngh.org/pub/CNSA/data2/CNP0000794/microbiome/f_Actinomycetaceae.assoc.summary.7z                       |
| f_Aeromonadaceae                         | family         | 28          | EAS      | 2, 545      | NA           | NA        | BGI        | https://ftp.cngh.org/pub/CNSA/data2/CNP0000794/microbiome/f_Aerococcaceae.assoc.summary.7z                          |
| f_Alcaligenaceae                         | family         | 13          | EAS      | 2, 545      | NA           | NA        | BGI        | https://ftp.cngh.org/pub/CNSA/data2/CNP0000794/microbiome/f_Aeromonadaceae.assoc.summary.7z                         |
| f_Bacillaceae                            | family         | 13          | EAS      | 2, 545      | NA           | NA        | BGI        | https://ftp.cngh.org/pub/CNSA/data2/CNP0000794/microbiome/f_Alcaligenaceae.assoc.summary.7z                         |
| f_Bifidobacteriaceae                     | family         | 59          | EAS      | 2, 545      | NA           | NA        | BGI        | https://ftp.cngh.org/pub/CNSA/data2/CNP0000794/microbiome/f_Bacillaceae.assoc.summary.7z                            |
| f_Brachyspiraceae                        | family         | 28          | EAS      | 2, 545      | NA           | NA        | BGI        | https://ftp.cngh.org/pub/CNSA/data2/CNP0000794/microbiome/f_Bifidobacteriaceae.assoc.summary.7z                     |
| f_Burkholderiaceae                       | family         | 12          | EAS      | 2, 545      | NA           | NA        | BGI        | https://ftp.cngh.org/pub/CNSA/data2/CNP0000794/microbiome/f_Brachyspiraceae.assoc.summary.7z                        |
| f_Clostridiales_Family_XI_Incertae_Sedis | family         | 56          | EAS      | 2, 545      | NA           | NA        | BGI        | https://ftp.cngh.org/pub/CNSA/data2/CNP0000794/microbiome/f_Burkholderiaceae.assoc.summary.7z                       |
| f_Comonadaceae                           | family         | 201         | EAS      | 2, 545      | NA           | NA        | BGI        | https://ftp.cngh.org/pub/CNSA/data2/CNP0000794/microbiome/f_Clostridiales_Family_XI_Incertae_Sedis.assoc.summary.7z |
| f_Coriobacteriaceae                      | family         | 0           | EAS      | 2, 545      | NA           | NA        | BGI        | https://ftp.cngh.org/pub/CNSA/data2/CNP0000794/microbiome/f_Comonadaceae.assoc.summary.7z                           |
| f_Enterobacteriaceae                     | family         | 30          | EAS      | 2, 545      | NA           | NA        | BGI        | https://ftp.cngh.org/pub/CNSA/data2/CNP0000794/microbiome/f_Coriobacteriaceae.assoc.summary.7z                      |
| f_Eubacteriaceae                         | family         | 29          | EAS      | 2, 545      | NA           | NA        | BGI        | https://ftp.cngh.org/pub/CNSA/data2/CNP0000794/microbiome/f_Enterobacteriaceae.assoc.summary.7z                     |
| f_Lachnospiraceae                        | family         | 40          | EAS      | 2, 545      | NA           | NA        | BGI        | https://ftp.cngh.org/pub/CNSA/data2/CNP0000794/microbiome/f_Eubacteriaceae.assoc.summary.7z                         |
| f_Lactobacillaceae                       | family         | 24          | EAS      | 2, 545      | NA           | NA        | BGI        | https://ftp.cngh.org/pub/CNSA/data2/CNP0000794/microbiome/f_Lachnospiraceae.assoc.summary.7z                        |
| f_Leuconostocaceae                       | family         | 89          | EAS      | 2, 545      | NA           | NA        | BGI        | https://ftp.cngh.org/pub/CNSA/data2/CNP0000794/microbiome/f_Lactobacillaceae.assoc.summary.7z                       |
| f_Moraxellaceae                          | family         | 28          | EAS      | 2, 545      | NA           | NA        | BGI        | https://ftp.cngh.org/pub/CNSA/data2/CNP0000794/microbiome/f_Leuconostocaceae.assoc.summary.7z                       |
| f_Neisseriaceae                          | family         | 10          | EAS      | 2, 545      | NA           | NA        | BGI        | https://ftp.cngh.org/pub/CNSA/data2/CNP0000794/microbiome/f_Moraxellaceae.assoc.summary.7z                          |
| f_Paenibacillaceae                       | family         | 25          | EAS      | 2, 545      | NA           | NA        | BGI        | https://ftp.cngh.org/pub/CNSA/data2/CNP0000794/microbiome/f_Neisseriaceae.assoc.summary.7z                          |
| f_Peptococcaceae                         | family         | 13          | EAS      | 2, 545      | NA           | NA        | BGI        | https://ftp.cngh.org/pub/CNSA/data2/CNP0000794/microbiome/f_Paenibacillaceae.assoc.summary.7z                       |
| f_Peptostreptococcaceae                  | family         | 13          | EAS      | 2, 545      | NA           | NA        | BGI        | https://ftp.cngh.org/pub/CNSA/data2/CNP0000794/microbiome/f_Peptococcaceae.assoc.summary.7z                         |
| f_Porphyrionadaceae                      | family         | 51          | EAS      | 2, 545      | NA           | NA        | BGI        | https://ftp.cngh.org/pub/CNSA/data2/CNP0000794/microbiome/f_Peptostreptococcaceae.assoc.summary.7z                  |
| f_Prevotellaceae                         | family         | 52          | EAS      | 2, 545      | NA           | NA        | BGI        | https://ftp.cngh.org/pub/CNSA/data2/CNP0000794/microbiome/f_Porphyrionadaceae.assoc.summary.7z                      |
| f_Pseudomonadaceae                       | family         | 21          | EAS      | 2, 545      | NA           | NA        | BGI        | https://ftp.cngh.org/pub/CNSA/data2/CNP0000794/microbiome/f_Prevotellaceae.assoc.summary.7z                         |
| f_Rhodocyclaceae                         | family         | 10          | EAS      | 2, 545      | NA           | NA        | BGI        | https://ftp.cngh.org/pub/CNSA/data2/CNP0000794/microbiome/f_Pseudomonadaceae.assoc.summary.7z                       |
| f_Staphylococcaceae                      | family         | 7           | EAS      | 2, 545      | NA           | NA        | BGI        | https://ftp.cngh.org/pub/CNSA/data2/CNP0000794/microbiome/f_Rhodocyclaceae.assoc.summary.7z                         |
| f_Streptococcaceae                       | family         | 49          | EAS      | 2, 545      | NA           | NA        | BGI        | https://ftp.cngh.org/pub/CNSA/data2/CNP0000794/microbiome/f_Staphylococcaceae.assoc.summary.7z                      |
| f_Succinivibrionaceae                    | family         | 41          | EAS      | 2, 545      | NA           | NA        | BGI        | https://ftp.cngh.org/pub/CNSA/data2/CNP0000794/microbiome/f_Streptococcaceae.assoc.summary.7z                       |
| f_Sutterellaceae                         | family         | 10          | EAS      | 2, 545      | NA           | NA        | BGI        | https://ftp.cngh.org/pub/CNSA/data2/CNP0000794/microbiome/f_Succinivibrionaceae.assoc.summary.7z                    |
| f_Thermoanaerobacteraceae                | family         | 39          | EAS      | 2, 545      | NA           | NA        | BGI        | https://ftp.cngh.org/pub/CNSA/data2/CNP0000794/microbiome/f_Sutterellaceae.assoc.summary.7z                         |
| f_Veillonellaceae                        | family         | 8           | EAS      | 2, 545      | NA           | NA        | BGI        | https://ftp.cngh.org/pub/CNSA/data2/CNP0000794/microbiome/f_Thermoanaerobacteraceae.assoc.summary.7z                |
| g_Ablotrophia                            | genus          | 31          | EAS      | 2, 545      | NA           | NA        | BGI        | https://ftp.cngh.org/pub/CNSA/data2/CNP0000794/microbiome/f_Veillonellaceae.assoc.summary.7z                        |
| g_Activibrio                             | genus          | 33          | EAS      | 2, 545      | NA           | NA        | BGI        | https://ftp.cngh.org/pub/CNSA/data2/CNP0000794/microbiome/g_Ablotrophia.assoc.summary.7z                            |
| g_Achromobacter                          | genus          | 12          | EAS      | 2, 545      | NA           | NA        | BGI        | https://ftp.cngh.org/pub/CNSA/data2/CNP0000794/microbiome/g_Activibrio.assoc.summary.7z                             |
| g_Acidaminococcus                        | genus          | 0           | EAS      | 2, 545      | NA           | NA        | BGI        | https://ftp.cngh.org/pub/CNSA/data2/CNP0000794/microbiome/g_Achromobacter.assoc.summary.7z                          |
| g_Acidovorax                             | genus          | 45          | EAS      | 2, 545      | NA           | NA        | BGI        | https://ftp.cngh.org/pub/CNSA/data2/CNP0000794/microbiome/g_Acidaminococcus.assoc.summary.7z                        |
| g_Actinobacillus                         | genus          | 11          | EAS      | 2, 545      | NA           | NA        | BGI        | https://ftp.cngh.org/pub/CNSA/data2/CNP0000794/microbiome/g_Acidovorax.assoc.summary.7z                             |
| g_Actinomyces                            | genus          | 6           | EAS      | 2, 545      | NA           | NA        | BGI        | https://ftp.cngh.org/pub/CNSA/data2/CNP0000794/microbiome/g_Actinobacillus.assoc.summary.7z                         |
| g_Aggregatibacter                        | genus          | 40          | EAS      | 2, 545      | NA           | NA        | BGI        | https://ftp.cngh.org/pub/CNSA/data2/CNP0000794/microbiome/g_Actinomyces.assoc.summary.7z                            |
| g_Alistipes                              | genus          | 27          | EAS      | 2, 545      | NA           | NA        | BGI        | https://ftp.cngh.org/pub/CNSA/data2/CNP0000794/microbiome/g_Aggregatibacter.assoc.summary.7z                        |
| g_Alkaliphilus                           | genus          | 27          | EAS      | 2, 545      | NA           | NA        | BGI        | https://ftp.cngh.org/pub/CNSA/data2/CNP0000794/microbiome/g_Alistipes.assoc.summary.7z                              |
| g_Anaerococcus                           | genus          | 14          | EAS      | 2, 545      | NA           | NA        | BGI        | https://ftp.cngh.org/pub/CNSA/data2/CNP0000794/microbiome/g_Alkaliphilus.assoc.summary.7z                           |
| g_Anaerofastis                           | genus          | 97          | EAS      | 2, 545      | NA           | NA        | BGI        | https://ftp.cngh.org/pub/CNSA/data2/CNP0000794/microbiome/g_Anaerococcus.assoc.summary.7z                           |
| g_Anaerostipes                           | genus          | 28          | EAS      | 2, 545      | NA           | NA        | BGI        | https://ftp.cngh.org/pub/CNSA/data2/CNP0000794/microbiome/g_Anaerofastis.assoc.summary.7z                           |
| g_Anaerotruncus                          | genus          | 43          | EAS      | 2, 545      | NA           | NA        | BGI        | https://ftp.cngh.org/pub/CNSA/data2/CNP0000794/microbiome/g_Anaerostipes.assoc.summary.7z                           |
| g_Atopobium                              | genus          | 31          | EAS      | 2, 545      | NA           | NA        | BGI        | https://ftp.cngh.org/pub/CNSA/data2/CNP0000794/microbiome/g_Anaerotruncus.assoc.summary.7z                          |
| g_Bacteroides                            | genus          | 39          | EAS      | 2, 545      | NA           | NA        | BGI        | https://ftp.cngh.org/pub/CNSA/data2/CNP0000794/microbiome/g_Atopobium.assoc.summary.7z                              |
| g_Blautia                                | genus          | 57          | EAS      | 2, 545      | NA           | NA        | BGI        | https://ftp.cngh.org/pub/CNSA/data2/CNP0000794/microbiome/g_Bacteroides.assoc.summary.7z                            |
| g_Cellulolilyticum                       | genus          | 40          | EAS      | 2, 545      | NA           | NA        | BGI        | https://ftp.cngh.org/pub/CNSA/data2/CNP0000794/microbiome/g_Blautia.assoc.summary.7z                                |
| g_Citrobacter                            | genus          | 14          | EAS      | 2, 545      | NA           | NA        | BGI        | https://ftp.cngh.org/pub/CNSA/data2/CNP0000794/microbiome/g_Cellulolilyticum.assoc.summary.7z                       |
| g_Clostridium                            | genus          | 25          | EAS      | 2, 545      | NA           | NA        | BGI        | https://ftp.cngh.org/pub/CNSA/data2/CNP0000794/microbiome/g_Citrobacter.assoc.summary.7z                            |
| g_Collinsella                            | genus          | 34          | EAS      | 2, 545      | NA           | NA        | BGI        | https://ftp.cngh.org/pub/CNSA/data2/CNP0000794/microbiome/g_Clostridium.assoc.summary.7z                            |
| g_Coproacillus                           | genus          | 26          | EAS      | 2, 545      | NA           | NA        | BGI        | https://ftp.cngh.org/pub/CNSA/data2/CNP0000794/microbiome/g_Collinsella.assoc.summary.7z                            |
| g_Coprococcus                            | genus          | 54          | EAS      | 2, 545      | NA           | NA        | BGI        | https://ftp.cngh.org/pub/CNSA/data2/CNP0000794/microbiome/g_Coproacillus.assoc.summary.7z                           |
| g_Cronobacter                            | genus          | 28          | EAS      | 2, 545      | NA           | NA        | BGI        | https://ftp.cngh.org/pub/CNSA/data2/CNP0000794/microbiome/g_Coprococcus.assoc.summary.7z                            |
| g_Desulfovibrio                          | genus          | 6           | EAS      | 2, 545      | NA           | NA        | BGI        | https://ftp.cngh.org/pub/CNSA/data2/CNP0000794/microbiome/g_Cronobacter.assoc.summary.7z                            |
| g_Dickeya                                | genus          | 24          | EAS      | 2, 545      | NA           | NA        | BGI        | https://ftp.cngh.org/pub/CNSA/data2/CNP0000794/microbiome/g_Desulfovibrio.assoc.summary.7z                          |
| g_Dorea                                  | genus          | 5           | EAS      | 2, 545      | NA           | NA        | BGI        | https://ftp.cngh.org/pub/CNSA/data2/CNP0000794/microbiome/g_Dickeya.assoc.summary.7z                                |
| g_Dysgonomonas                           | genus          | 40          | EAS      | 2, 545      | NA           | NA        | BGI        | https://ftp.cngh.org/pub/CNSA/data2/CNP0000794/microbiome/g_Dorea.assoc.summary.7z                                  |
| g_Edwardsiella                           | genus          | 12          | EAS      | 2, 545      | NA           | NA        | BGI        | https://ftp.cngh.org/pub/CNSA/data2/CNP0000794/microbiome/g_Dysgonomonas.assoc.summary.7z                           |
| g_Enterobacter                           | genus          | 2           | EAS      | 2, 545      | NA           | NA        | BGI        | https://ftp.cngh.org/pub/CNSA/data2/CNP0000794/microbiome/g_Edwardsiella.assoc.summary.7z                           |
| g_Epulopiscium                           | genus          | 22          | EAS      | 2, 545      | NA           | NA        | BGI        | https://ftp.cngh.org/pub/CNSA/data2/CNP0000794/microbiome/g_Enterobacter.assoc.summary.7z                           |
| g_Eremococcus                            | genus          | 10          | EAS      | 2, 545      | NA           | NA        | BGI        | https://ftp.cngh.org/pub/CNSA/data2/CNP0000794/microbiome/g_Epulopiscium.assoc.summary.7z                           |
| g_Erwinia                                | genus          | 11          | EAS      | 2, 545      | NA           | NA        | BGI        | https://ftp.cngh.org/pub/CNSA/data2/CNP0000794/microbiome/g_Eremococcus.assoc.summary.7z                            |
| g_Escherichia                            | genus          | 9           | EAS      | 2, 545      | NA           | NA        | BGI        | https://ftp.cngh.org/pub/CNSA/data2/CNP0000794/microbiome/g_Erwinia.assoc.summary.7z                                |
| g_Ethanoligenens                         | genus          | 23          | EAS      | 2, 545      | NA           | NA        | BGI        | https://ftp.cngh.org/pub/CNSA/data2/CNP0000794/microbiome/g_Escherichia.assoc.summary.7z                            |
| g_Faecalibacterium                       | genus          | 12          | EAS      | 2, 545      | NA           | NA        | BGI        | https://ftp.cngh.org/pub/CNSA/data2/CNP0000794/microbiome/g_Ethanoligenens.assoc.summary.7z                         |
| g_Filifactor                             | genus          | 98          | EAS      | 2, 545      | NA           | NA        | BGI        | https://ftp.cngh.org/pub/CNSA/data2/CNP0000794/microbiome/g_Faecalibacterium.assoc.summary.7z                       |
| g_Finegoldia                             | genus          | 8           | EAS      | 2, 545      | NA           | NA        | BGI        | https://ftp.cngh.org/pub/CNSA/data2/CNP0000794/microbiome/g_Filifactor.assoc.summary.7z                             |
| g_Fusobacterium                          | genus          | 18          | EAS      | 2, 545      | NA           | NA        | BGI        | https://ftp.cngh.org/pub/CNSA/data2/CNP0000794/microbiome/g_Finegoldia.assoc.summary.7z                             |
| g_Gardnerella                            | genus          | 20          | EAS      | 2, 545      | NA           | NA        | BGI        | https://ftp.cngh.org/pub/CNSA/data2/CNP0000794/microbiome/g_Fusobacterium.assoc.summary.7z                          |
| g_Gemella                                | genus          | 5           | EAS      | 2, 545      | NA           | NA        | BGI        | https://ftp.cngh.org/pub/CNSA/data2/CNP0000794/microbiome/g_Gardnerella.assoc.summary.7z                            |
| g_Granulicatella                         | genus          | 34          | EAS      | 2, 545      | NA           | NA        | BGI        | https://ftp.cngh.org/pub/CNSA/data2/CNP0000794/microbiome/g_Gemella.assoc.summary.7z                                |
| g_Helicobacter                           | genus          | 54          | EAS      | 2, 545      | NA           | NA        | BGI        | https://ftp.cngh.org/pub/CNSA/data2/CNP0000794/microbiome/g_Granulicatella.assoc.summary.7z                         |
| g_Histophilus                            | genus          | 5           | EAS      | 2, 545      | NA           | NA        | BGI        | https://ftp.cngh.org/pub/CNSA/data2/CNP0000794/microbiome/g_Helicobacter.assoc.summary.7z                           |
| g_Holdemania                             | genus          | 7           | EAS      | 2, 545      | NA           | NA        | BGI        | https://ftp.cngh.org/pub/CNSA/data2/CNP0000794/microbiome/g_Histophilus.assoc.summary.7z                            |
|                                          | genus          | 0           | EAS      | 2, 545      | NA           | NA        | BGI        | https://ftp.cngh.org/pub/CNSA/data2/CNP0000794/microbiome/g_Holdemania.assoc.summary.7z                             |



Cheng S, et al. *Stroke Vasc Neurol* 2024;0:1–8. doi: 10.1136/svn-2023-002717





|                                                        |         |     |     |        |    |     |
|--------------------------------------------------------|---------|-----|-----|--------|----|-----|
| s_Prevotella_marshii                                   | species | 99  | EAS | 2, 545 | NA | BGI |
| s_Prevotella_melanogenica                              | species | 10  | EAS | 2, 545 | NA | BGI |
| s_Prevotella_multiformis                               | species | 9   | EAS | 2, 545 | NA | BGI |
| s_Prevotella_multisaccharivorax                        | species | 4   | EAS | 2, 545 | NA | BGI |
| s_Prevotella_nigrescens                                | species | 4   | EAS | 2, 545 | NA | BGI |
| s_Prevotella_oris                                      | species | 28  | EAS | 2, 545 | NA | BGI |
| s_Prevotella_pullens                                   | species | 13  | EAS | 2, 545 | NA | BGI |
| s_Prevotella_salivae                                   | species | 6   | EAS | 2, 545 | NA | BGI |
| s_Prevotella_tannerae                                  | species | 33  | EAS | 2, 545 | NA | BGI |
| s_Prevotella_timonensis                                | species | 85  | EAS | 2, 545 | NA | BGI |
| s_Prevotella_veroralis                                 | species | 8   | EAS | 2, 545 | NA | BGI |
| s_Providencia_rettgeri                                 | species | 26  | EAS | 2, 545 | NA | BGI |
| s_Pseudoflavonifractor_capillosus                      | species | 30  | EAS | 2, 545 | NA | BGI |
| s_Pseudomonas_stutzeri                                 | species | 9   | EAS | 2, 545 | NA | BGI |
| s_Roseburia_intestinalis                               | species | 18  | EAS | 2, 545 | NA | BGI |
| s_Ruminococcus_albus                                   | species | 27  | EAS | 2, 545 | NA | BGI |
| s_Ruminococcus_bromii                                  | species | 21  | EAS | 2, 545 | NA | BGI |
| s_Ruminococcus_champagnellensis                        | species | 25  | EAS | 2, 545 | NA | BGI |
| s_Ruminococcus_flavefaciens                            | species | 15  | EAS | 2, 545 | NA | BGI |
| s_Ruminococcus_gnavus                                  | species | 33  | EAS | 2, 545 | NA | BGI |
| s_Ruminococcus_lactaris                                | species | 33  | EAS | 2, 545 | NA | BGI |
| s_Ruminococcus_obum                                    | species | 38  | EAS | 2, 545 | NA | BGI |
| s_Ruminococcus_toporus                                 | species | 29  | EAS | 2, 545 | NA | BGI |
| s_Salmonella_enterica                                  | species | 30  | EAS | 2, 545 | NA | BGI |
| s_Serratia_odorifera                                   | species | 10  | EAS | 2, 545 | NA | BGI |
| s_Shewanella_putrefaciens                              | species | 14  | EAS | 2, 545 | NA | BGI |
| s_Slackia_exigua                                       | species | 12  | EAS | 2, 545 | NA | BGI |
| s_Staphylococcus_aureus                                | species | 5   | EAS | 2, 545 | NA | BGI |
| s_Streptococcus_anginosus                              | species | 42  | EAS | 2, 545 | NA | BGI |
| s_Streptococcus_australis                              | species | 27  | EAS | 2, 545 | NA | BGI |
| s_Streptococcus_constellatus                           | species | 11  | EAS | 2, 545 | NA | BGI |
| s_Streptococcus_cristatus                              | species | 10  | EAS | 2, 545 | NA | BGI |
| s_Streptococcus_dysgalactiae                           | species | 26  | EAS | 2, 545 | NA | BGI |
| s_Streptococcus_galloyticus                            | species | 116 | EAS | 2, 545 | NA | BGI |
| s_Streptococcus_gordonii                               | species | 32  | EAS | 2, 545 | NA | BGI |
| s_Streptococcus_infantarius                            | species | 22  | EAS | 2, 545 | NA | BGI |
| s_Streptococcus_infantis                               | species | 45  | EAS | 2, 545 | NA | BGI |
| s_Streptococcus_mitis                                  | species | 49  | EAS | 2, 545 | NA | BGI |
| s_Streptococcus_mitis                                  | species | 29  | EAS | 2, 545 | NA | BGI |
| s_Streptococcus_oralis                                 | species | 26  | EAS | 2, 545 | NA | BGI |
| s_Streptococcus_parasanguinis                          | species | 30  | EAS | 2, 545 | NA | BGI |
| s_Streptococcus_peroris                                | species | 12  | EAS | 2, 545 | NA | BGI |
| s_Streptococcus_pneumoniae                             | species | 41  | EAS | 2, 545 | NA | BGI |
| s_Streptococcus_pseudopneumoniae                       | species | 6   | EAS | 2, 545 | NA | BGI |
| s_Streptococcus_pyogenes                               | species | 28  | EAS | 2, 545 | NA | BGI |
| s_Streptococcus_salivarius                             | species | 28  | EAS | 2, 545 | NA | BGI |
| s_Streptococcus_sanguinis                              | species | 25  | EAS | 2, 545 | NA | BGI |
| s_Streptococcus_suis                                   | species | 34  | EAS | 2, 545 | NA | BGI |
| s_Streptococcus_vestibularis                           | species | 29  | EAS | 2, 545 | NA | BGI |
| s_Succinacidomonas_hippel                              | species | 10  | EAS | 2, 545 | NA | BGI |
| s_Tannerella_forsythia                                 | species | 18  | EAS | 2, 545 | NA | BGI |
| s_Treponema_denticola                                  | species | 18  | EAS | 2, 545 | NA | BGI |
| s_Treponema_vincentii                                  | species | 18  | EAS | 2, 545 | NA | BGI |
| s_Turicibacter_sanguinis                               | species | 9   | EAS | 2, 545 | NA | BGI |
| s_unclassified_Citrobacter_sp._30_2                    | species | 29  | EAS | 2, 545 | NA | BGI |
| s_unclassified_Clostridiales_bacterium_1_7_47FAA       | species | 34  | EAS | 2, 545 | NA | BGI |
| s_unclassified_Clostridium_sp._D5                      | species | 26  | EAS | 2, 545 | NA | BGI |
| s_unclassified_Clostridium_sp._HGf2                    | species | 68  | EAS | 2, 545 | NA | BGI |
| s_unclassified_Clostridium_sp._L2-50                   | species | 26  | EAS | 2, 545 | NA | BGI |
| s_unclassified_Clostridium_sp._SY8519                  | species | 37  | EAS | 2, 545 | NA | BGI |
| s_unclassified_Coprobacillus_sp._29_1                  | species | 78  | EAS | 2, 545 | NA | BGI |
| s_unclassified_Deinifovibrio_sp._3_1_syn3              | species | 9   | EAS | 2, 545 | NA | BGI |
| s_unclassified_Eggerthella_sp._YY7918                  | species | 11  | EAS | 2, 545 | NA | BGI |
| s_unclassified_Enterobacteriaceae_bacterium_9_2_54FAA  | species | 28  | EAS | 2, 545 | NA | BGI |
| s_unclassified_Erysipelotrichaceae_bacterium_3_1_53    | species | 30  | EAS | 2, 545 | NA | BGI |
| s_unclassified_Erysipelotrichaceae_bacterium_5_2_54FAA | species | 29  | EAS | 2, 545 | NA | BGI |
| s_unclassified_Lachnospiraceae_bacterium_1_4_56FAA     | species | 36  | EAS | 2, 545 | NA | BGI |
| s_unclassified_Lachnospiraceae_bacterium_2_1_46FAA     | species | 116 | EAS | 2, 545 | NA | BGI |
| s_unclassified_Lachnospiraceae_bacterium_3_1_57FAA_CTI | species | 68  | EAS | 2, 545 | NA | BGI |
| s_unclassified_Lachnospiraceae_bacterium_9_1_43BFAA    | species | 53  | EAS | 2, 545 | NA | BGI |
| s_unclassified_Megasphaera_sp._UP11_135-E              | species | 34  | EAS | 2, 545 | NA | BGI |
| s_unclassified_Oribacterium_sp._oral_taxon_078         | species | 8   | EAS | 2, 545 | NA | BGI |
| s_unclassified_Oribacterium_sp._oral_taxon_108         | species | 9   | EAS | 2, 545 | NA | BGI |
| s_unclassified_Peptoniphilus_sp._oral_taxon_386        | species | 15  | EAS | 2, 545 | NA | BGI |
| s_unclassified_Prevotella_sp._oral_taxon_472           | species | 6   | EAS | 2, 545 | NA | BGI |
| s_unclassified_Ruminococcaceae_bacterium_D16           | species | 32  | EAS | 2, 545 | NA | BGI |
| s_unclassified_Ruminococcus_sp._5_1_39BFAA             | species | 26  | EAS | 2, 545 | NA | BGI |
| s_unclassified_Streptococcus_oralis                    | species | 9   | EAS | 2, 545 | NA | BGI |
| s_unclassified_Streptococcus_sp._C150                  | species | 29  | EAS | 2, 545 | NA | BGI |
| s_unclassified_Streptococcus_sp._M143                  | species | 9   | EAS | 2, 545 | NA | BGI |
| s_unclassified_Streptococcus_sp._oral_taxon_071        | species | 36  | EAS | 2, 545 | NA | BGI |
| s_unclassified_Veillonella_sp._oral_taxon_158          | species | 26  | EAS | 2, 545 | NA | BGI |
| s_Veillonella_atypica                                  | species | 29  | EAS | 2, 545 | NA | BGI |

|                                                                                                                                   |
|-----------------------------------------------------------------------------------------------------------------------------------|
| https://ftp.cngb.org/pub/CNSA/data2/CNP0000794/microbiome/s_Prevotella_marshii.assoc.summary.7z                                   |
| https://ftp.cngb.org/pub/CNSA/data2/CNP0000794/microbiome/s_Prevotella_melanogenica.assoc.summary.7z                              |
| https://ftp.cngb.org/pub/CNSA/data2/CNP0000794/microbiome/s_Prevotella_multiformis.assoc.summary.7z                               |
| https://ftp.cngb.org/pub/CNSA/data2/CNP0000794/microbiome/s_Prevotella_multisaccharivorax.assoc.summary.7z                        |
| https://ftp.cngb.org/pub/CNSA/data2/CNP0000794/microbiome/s_Prevotella_nigrescens.assoc.summary.7z                                |
| https://ftp.cngb.org/pub/CNSA/data2/CNP0000794/microbiome/s_Prevotella_oris.assoc.summary.7z                                      |
| https://ftp.cngb.org/pub/CNSA/data2/CNP0000794/microbiome/s_Prevotella_pullens.assoc.summary.7z                                   |
| https://ftp.cngb.org/pub/CNSA/data2/CNP0000794/microbiome/s_Prevotella_salivae.assoc.summary.7z                                   |
| https://ftp.cngb.org/pub/CNSA/data2/CNP0000794/microbiome/s_Prevotella_tannerae.assoc.summary.7z                                  |
| https://ftp.cngb.org/pub/CNSA/data2/CNP0000794/microbiome/s_Prevotella_timonensis.assoc.summary.7z                                |
| https://ftp.cngb.org/pub/CNSA/data2/CNP0000794/microbiome/s_Prevotella_veroralis.assoc.summary.7z                                 |
| https://ftp.cngb.org/pub/CNSA/data2/CNP0000794/microbiome/s_Providencia_rettgeri.assoc.summary.7z                                 |
| https://ftp.cngb.org/pub/CNSA/data2/CNP0000794/microbiome/s_Pseudoflavonifractor_capillosus.assoc.summary.7z                      |
| https://ftp.cngb.org/pub/CNSA/data2/CNP0000794/microbiome/s_Pseudomonas_stutzeri.assoc.summary.7z                                 |
| https://ftp.cngb.org/pub/CNSA/data2/CNP0000794/microbiome/s_Roseburia_intestinalis.assoc.summary.7z                               |
| https://ftp.cngb.org/pub/CNSA/data2/CNP0000794/microbiome/s_Ruminococcus_albus.assoc.summary.7z                                   |
| https://ftp.cngb.org/pub/CNSA/data2/CNP0000794/microbiome/s_Ruminococcus_bromii.assoc.summary.7z                                  |
| https://ftp.cngb.org/pub/CNSA/data2/CNP0000794/microbiome/s_Ruminococcus_champagnellensis.assoc.summary.7z                        |
| https://ftp.cngb.org/pub/CNSA/data2/CNP0000794/microbiome/s_Ruminococcus_flavefaciens.assoc.summary.7z                            |
| https://ftp.cngb.org/pub/CNSA/data2/CNP0000794/microbiome/s_Ruminococcus_gnavus.assoc.summary.7z                                  |
| https://ftp.cngb.org/pub/CNSA/data2/CNP0000794/microbiome/s_Ruminococcus_lactaris.assoc.summary.7z                                |
| https://ftp.cngb.org/pub/CNSA/data2/CNP0000794/microbiome/s_Ruminococcus_obum.assoc.summary.7z                                    |
| https://ftp.cngb.org/pub/CNSA/data2/CNP0000794/microbiome/s_Ruminococcus_toporus.assoc.summary.7z                                 |
| https://ftp.cngb.org/pub/CNSA/data2/CNP0000794/microbiome/s_Salmonella_enterica.assoc.summary.7z                                  |
| https://ftp.cngb.org/pub/CNSA/data2/CNP0000794/microbiome/s_Serratia_odorifera.assoc.summary.7z                                   |
| https://ftp.cngb.org/pub/CNSA/data2/CNP0000794/microbiome/s_Shewanella_putrefaciens.assoc.summary.7z                              |
| https://ftp.cngb.org/pub/CNSA/data2/CNP0000794/microbiome/s_Slackia_exigua.assoc.summary.7z                                       |
| https://ftp.cngb.org/pub/CNSA/data2/CNP0000794/microbiome/s_Staphylococcus_aureus.assoc.summary.7z                                |
| https://ftp.cngb.org/pub/CNSA/data2/CNP0000794/microbiome/s_Streptococcus_anginosus.assoc.summary.7z                              |
| https://ftp.cngb.org/pub/CNSA/data2/CNP0000794/microbiome/s_Streptococcus_australis.assoc.summary.7z                              |
| https://ftp.cngb.org/pub/CNSA/data2/CNP0000794/microbiome/s_Streptococcus_constellatus.assoc.summary.7z                           |
| https://ftp.cngb.org/pub/CNSA/data2/CNP0000794/microbiome/s_Streptococcus_cristatus.assoc.summary.7z                              |
| https://ftp.cngb.org/pub/CNSA/data2/CNP0000794/microbiome/s_Streptococcus_dysgalactiae.assoc.summary.7z                           |
| https://ftp.cngb.org/pub/CNSA/data2/CNP0000794/microbiome/s_Streptococcus_galloyticus.assoc.summary.7z                            |
| https://ftp.cngb.org/pub/CNSA/data2/CNP0000794/microbiome/s_Streptococcus_gordonii.assoc.summary.7z                               |
| https://ftp.cngb.org/pub/CNSA/data2/CNP0000794/microbiome/s_Streptococcus_infantarius.assoc.summary.7z                            |
| https://ftp.cngb.org/pub/CNSA/data2/CNP0000794/microbiome/s_Streptococcus_infantis.assoc.summary.7z                               |
| https://ftp.cngb.org/pub/CNSA/data2/CNP0000794/microbiome/s_Streptococcus_mitis.assoc.summary.7z                                  |
| https://ftp.cngb.org/pub/CNSA/data2/CNP0000794/microbiome/s_Streptococcus_mitis.assoc.summary.7z                                  |
| https://ftp.cngb.org/pub/CNSA/data2/CNP0000794/microbiome/s_Streptococcus_oralis.assoc.summary.7z                                 |
| https://ftp.cngb.org/pub/CNSA/data2/CNP0000794/microbiome/s_Streptococcus_parasanguinis.assoc.summary.7z                          |
| https://ftp.cngb.org/pub/CNSA/data2/CNP0000794/microbiome/s_Streptococcus_peroris.assoc.summary.7z                                |
| https://ftp.cngb.org/pub/CNSA/data2/CNP0000794/microbiome/s_Streptococcus_pneumoniae.assoc.summary.7z                             |
| https://ftp.cngb.org/pub/CNSA/data2/CNP0000794/microbiome/s_Streptococcus_pseudopneumoniae.assoc.summary.7z                       |
| https://ftp.cngb.org/pub/CNSA/data2/CNP0000794/microbiome/s_Streptococcus_pyogenes.assoc.summary.7z                               |
| https://ftp.cngb.org/pub/CNSA/data2/CNP0000794/microbiome/s_Streptococcus_salivarius.assoc.summary.7z                             |
| https://ftp.cngb.org/pub/CNSA/data2/CNP0000794/microbiome/s_Streptococcus_sanguinis.assoc.summary.7z                              |
| https://ftp.cngb.org/pub/CNSA/data2/CNP0000794/microbiome/s_Streptococcus_suis.assoc.summary.7z                                   |
| https://ftp.cngb.org/pub/CNSA/data2/CNP0000794/microbiome/s_Streptococcus_vestibularis.assoc.summary.7z                           |
| https://ftp.cngb.org/pub/CNSA/data2/CNP0000794/microbiome/s_Succinacidomonas_hippel.assoc.summary.7z                              |
| https://ftp.cngb.org/pub/CNSA/data2/CNP0000794/microbiome/s_Tannerella_forsythia.assoc.summary.7z                                 |
| https://ftp.cngb.org/pub/CNSA/data2/CNP0000794/microbiome/s_Treponema_denticola.assoc.summary.7z                                  |
| https://ftp.cngb.org/pub/CNSA/data2/CNP0000794/microbiome/s_Treponema_vincentii.assoc.summary.7z                                  |
| https://ftp.cngb.org/pub/CNSA/data2/CNP0000794/microbiome/s_Turicibacter_sanguinis.assoc.summary.7z                               |
| https://ftp.cngb.org/pub/CNSA/data2/CNP0000794/microbiome/s_unclassified_Citrobacter_sp._30_2.assoc.summary.7z                    |
| https://ftp.cngb.org/pub/CNSA/data2/CNP0000794/microbiome/s_unclassified_Clostridiales_bacterium_1_7_47FAA.assoc.summary.7z       |
| https://ftp.cngb.org/pub/CNSA/data2/CNP0000794/microbiome/s_unclassified_Clostridium_sp._D5.assoc.summary.7z                      |
| https://ftp.cngb.org/pub/CNSA/data2/CNP0000794/microbiome/s_unclassified_Clostridium_sp._HGf2.assoc.summary.7z                    |
| https://ftp.cngb.org/pub/CNSA/data2/CNP0000794/microbiome/s_unclassified_Clostridium_sp._L2-50.assoc.summary.7z                   |
| https://ftp.cngb.org/pub/CNSA/data2/CNP0000794/microbiome/s_unclassified_Clostridium_sp._SY8519.assoc.summary.7z                  |
| https://ftp.cngb.org/pub/CNSA/data2/CNP0000794/microbiome/s_unclassified_Coprobacillus_sp._29_1.assoc.summary.7z                  |
| https://ftp.cngb.org/pub/CNSA/data2/CNP0000794/microbiome/s_unclassified_Deinifovibrio_sp._3_1_syn3.assoc.summary.7z              |
| https://ftp.cngb.org/pub/CNSA/data2/CNP0000794/microbiome/s_unclassified_Eggerthella_sp._YY7918.assoc.summary.7z                  |
| https://ftp.cngb.org/pub/CNSA/data2/CNP0000794/microbiome/s_unclassified_Enterobacteriaceae_bacterium_9_2_54FAA.assoc.summary.7z  |
| https://ftp.cngb.org/pub/CNSA/data2/CNP0000794/microbiome/s_unclassified_Erysipelotrichaceae_bacterium_3_1_53.assoc.summary.7z    |
| https://ftp.cngb.org/pub/CNSA/data2/CNP0000794/microbiome/s_unclassified_Erysipelotrichaceae_bacterium_5_2_54FAA.assoc.summary.7z |
| https://ftp.cngb.org/pub/CNSA/data2/CNP0000794/microbiome/s_unclassified_Lachnospiraceae_bacterium_1_4_56FAA.assoc.summary.7z     |
| https://ftp.cngb.org/pub/CNSA/data2/CNP0000794/microbiome/s_unclassified_Lachnospiraceae_bacterium_2_1_46FAA.assoc.summary.7z     |
| https://ftp.cngb.org/pub/CNSA/data2/CNP0000794/microbiome/s_unclassified_Lachnospiraceae_bacterium_3_1_57FAA_CTI.assoc.summary.7z |
| https://ftp.cngb.org/pub/CNSA/data2/CNP0000794/microbiome/s_unclassified_Lachnospiraceae_bacterium_9_1_43BFAA.assoc.summary.7z    |
| https://ftp.cngb.org/pub/CNSA/data2/CNP0000794/microbiome/s_unclassified_Megasphaera_sp._UP11_135-E.assoc.summary.7z              |
| https://ftp.cngb.org/pub/CNSA/data2/CNP0000794/microbiome/s_unclassified_Oribacterium_sp._oral_taxon_078.assoc.summary.7z         |
| https://ftp.cngb.org/pub/CNSA/data2/CNP0000794/microbiome/s_unclassified_Oribacterium_sp._oral_taxon_108.assoc.summary.7z         |
| https://ftp.cngb.org/pub/CNSA/data2/CNP0000794/microbiome/s_unclassified_Peptoniphilus_sp._oral_taxon_386.assoc.summary.7z        |
| https://ftp.cngb.org/pub/CNSA/data2/CNP0000794/microbiome/s_unclassified_Prevotella_sp._oral_taxon_472.assoc.summary.7z           |
| https://ftp.cngb.org/pub/CNSA/data2/CNP0000794/microbiome/s_unclassified_Ruminococcaceae_bacterium_D16.assoc.summary.7z           |
| https://ftp.cngb.org/pub/CNSA/data2/CNP0000794/microbiome/s_unclassified_Ruminococcus_sp._5_1_39BFAA.assoc.summary.7z             |
| https://ftp.cngb.org/pub/CNSA/data2/CNP0000794/microbiome/s_unclassified_Streptococcus_oralis.assoc.summary.7z                    |
| https://ftp.cngb.org/pub/CNSA/data2/CNP0000794/microbiome/s_unclassified_Streptococcus_sp._C150.assoc.summary.7z                  |
| https://ftp.cngb.org/pub/CNSA/data2/CNP0000794/microbiome/s_unclassified_Streptococcus_sp._M143.assoc.summary.7z                  |
| https://ftp.cngb.org/pub/CNSA/data2/CNP0000794/microbiome/s_unclassified_Streptococcus_sp._oral_taxon_071.assoc.summary.7z        |
| https://ftp.cngb.org/pub/CNSA/data2/CNP0000794/microbiome/s_unclassified_Veillonella_sp._oral_taxon_158.assoc.summary.7z          |
| https://ftp.cngb.org/pub/CNSA/data2/CNP0000794/microbiome/s_Veillonella_atypica.assoc.summary.7z                                  |



[illegible]

|                                               |        |      |     |          |         |          |                       |                                                                                                                                                                                                                                                                                   |
|-----------------------------------------------|--------|------|-----|----------|---------|----------|-----------------------|-----------------------------------------------------------------------------------------------------------------------------------------------------------------------------------------------------------------------------------------------------------------------------------|
| genus. Alloprevotella. id. 961                | genus  | 0    | EU  | 18, 340  | NA      | NA       | MiBioGen Consortium   | <a href="https://molgenis26.gcc.rug.nl/downloads/MiBioGen/MiBioGen_QnbQTL_summary_genus.zip">https://molgenis26.gcc.rug.nl/downloads/MiBioGen/MiBioGen_QnbQTL_summary_genus.zip</a>                                                                                               |
| genus. ChristensenellaceaeR_Tgroup. id. 11283 | genus  | 0    | EU  | 18, 340  | NA      | NA       | MiBioGen Consortium   | <a href="https://molgenis26.gcc.rug.nl/downloads/MiBioGen/MiBioGen_QnbQTL_summary_genus.zip">https://molgenis26.gcc.rug.nl/downloads/MiBioGen/MiBioGen_QnbQTL_summary_genus.zip</a>                                                                                               |
| genus. Clostridiuminnocuumgroup. id. 14397    | genus  | 0    | EU  | 18, 340  | NA      | NA       | MiBioGen Consortium   | <a href="https://molgenis26.gcc.rug.nl/downloads/MiBioGen/MiBioGen_QnbQTL_summary_genus.zip">https://molgenis26.gcc.rug.nl/downloads/MiBioGen/MiBioGen_QnbQTL_summary_genus.zip</a>                                                                                               |
| genus. Coprococcus1. id. 11301                | genus  | 0    | EU  | 18, 340  | NA      | NA       | MiBioGen Consortium   | <a href="https://molgenis26.gcc.rug.nl/downloads/MiBioGen/MiBioGen_QnbQTL_summary_genus.zip">https://molgenis26.gcc.rug.nl/downloads/MiBioGen/MiBioGen_QnbQTL_summary_genus.zip</a>                                                                                               |
| genus. Coprococcus3. id. 11303                | genus  | 0    | EU  | 18, 340  | NA      | NA       | MiBioGen Consortium   | <a href="https://molgenis26.gcc.rug.nl/downloads/MiBioGen/MiBioGen_QnbQTL_summary_genus.zip">https://molgenis26.gcc.rug.nl/downloads/MiBioGen/MiBioGen_QnbQTL_summary_genus.zip</a>                                                                                               |
| genus. Desulfotomaculum. id. 3173             | genus  | 0    | EU  | 18, 340  | NA      | NA       | MiBioGen Consortium   | <a href="https://molgenis26.gcc.rug.nl/downloads/MiBioGen/MiBioGen_QnbQTL_summary_genus.zip">https://molgenis26.gcc.rug.nl/downloads/MiBioGen/MiBioGen_QnbQTL_summary_genus.zip</a>                                                                                               |
| genus. Flavonifractor. id. 2059               | genus  | 0    | EU  | 18, 340  | NA      | NA       | MiBioGen Consortium   | <a href="https://molgenis26.gcc.rug.nl/downloads/MiBioGen/MiBioGen_QnbQTL_summary_genus.zip">https://molgenis26.gcc.rug.nl/downloads/MiBioGen/MiBioGen_QnbQTL_summary_genus.zip</a>                                                                                               |
| genus. Holdemania. id. 11393                  | genus  | 0    | EU  | 18, 340  | NA      | NA       | MiBioGen Consortium   | <a href="https://molgenis26.gcc.rug.nl/downloads/MiBioGen/MiBioGen_QnbQTL_summary_genus.zip">https://molgenis26.gcc.rug.nl/downloads/MiBioGen/MiBioGen_QnbQTL_summary_genus.zip</a>                                                                                               |
| genus. Holdemania. id. 2157                   | genus  | 0    | EU  | 18, 340  | NA      | NA       | MiBioGen Consortium   | <a href="https://molgenis26.gcc.rug.nl/downloads/MiBioGen/MiBioGen_QnbQTL_summary_genus.zip">https://molgenis26.gcc.rug.nl/downloads/MiBioGen/MiBioGen_QnbQTL_summary_genus.zip</a>                                                                                               |
| genus. LachnospiraceaeN03007group. id. 11317  | genus  | 0    | EU  | 18, 340  | NA      | NA       | MiBioGen Consortium   | <a href="https://molgenis26.gcc.rug.nl/downloads/MiBioGen/MiBioGen_QnbQTL_summary_genus.zip">https://molgenis26.gcc.rug.nl/downloads/MiBioGen/MiBioGen_QnbQTL_summary_genus.zip</a>                                                                                               |
| genus. Lachnospira. id. 2004                  | genus  | 0    | EU  | 18, 340  | NA      | NA       | MiBioGen Consortium   | <a href="https://molgenis26.gcc.rug.nl/downloads/MiBioGen/MiBioGen_QnbQTL_summary_genus.zip">https://molgenis26.gcc.rug.nl/downloads/MiBioGen/MiBioGen_QnbQTL_summary_genus.zip</a>                                                                                               |
| genus. Prevotella9. id. 11183                 | genus  | 0    | EU  | 18, 340  | NA      | NA       | MiBioGen Consortium   | <a href="https://molgenis26.gcc.rug.nl/downloads/MiBioGen/MiBioGen_QnbQTL_summary_genus.zip">https://molgenis26.gcc.rug.nl/downloads/MiBioGen/MiBioGen_QnbQTL_summary_genus.zip</a>                                                                                               |
| genus. Roseburia. id. 2012                    | genus  | 0    | EU  | 18, 340  | NA      | NA       | MiBioGen Consortium   | <a href="https://molgenis26.gcc.rug.nl/downloads/MiBioGen/MiBioGen_QnbQTL_summary_genus.zip">https://molgenis26.gcc.rug.nl/downloads/MiBioGen/MiBioGen_QnbQTL_summary_genus.zip</a>                                                                                               |
| genus. RuminococcaceaeOC010. id. 11367        | genus  | 0    | EU  | 18, 340  | NA      | NA       | MiBioGen Consortium   | <a href="https://molgenis26.gcc.rug.nl/downloads/MiBioGen/MiBioGen_QnbQTL_summary_genus.zip">https://molgenis26.gcc.rug.nl/downloads/MiBioGen/MiBioGen_QnbQTL_summary_genus.zip</a>                                                                                               |
| genus. Senegalimassilia. id. 11160            | genus  | 0    | EU  | 18, 340  | NA      | NA       | MiBioGen Consortium   | <a href="https://molgenis26.gcc.rug.nl/downloads/MiBioGen/MiBioGen_QnbQTL_summary_genus.zip">https://molgenis26.gcc.rug.nl/downloads/MiBioGen/MiBioGen_QnbQTL_summary_genus.zip</a>                                                                                               |
| genus. Subdoligranulum. id. 2070              | genus  | 0    | EU  | 18, 340  | NA      | NA       | MiBioGen Consortium   | <a href="https://molgenis26.gcc.rug.nl/downloads/MiBioGen/MiBioGen_QnbQTL_summary_genus.zip">https://molgenis26.gcc.rug.nl/downloads/MiBioGen/MiBioGen_QnbQTL_summary_genus.zip</a>                                                                                               |
| genus. Sutterella. id. 2896                   | genus  | 0    | EU  | 18, 340  | NA      | NA       | MiBioGen Consortium   | <a href="https://molgenis26.gcc.rug.nl/downloads/MiBioGen/MiBioGen_QnbQTL_summary_genus.zip">https://molgenis26.gcc.rug.nl/downloads/MiBioGen/MiBioGen_QnbQTL_summary_genus.zip</a>                                                                                               |
| genus. Terrisporobacter. id. 11348            | genus  | 0    | EU  | 18, 340  | NA      | NA       | MiBioGen Consortium   | <a href="https://molgenis26.gcc.rug.nl/downloads/MiBioGen/MiBioGen_QnbQTL_summary_genus.zip">https://molgenis26.gcc.rug.nl/downloads/MiBioGen/MiBioGen_QnbQTL_summary_genus.zip</a>                                                                                               |
| genus. Tyzzerella3. id. 11335                 | genus  | 0    | EU  | 18, 340  | NA      | NA       | MiBioGen Consortium   | <a href="https://molgenis26.gcc.rug.nl/downloads/MiBioGen/MiBioGen_QnbQTL_summary_genus.zip">https://molgenis26.gcc.rug.nl/downloads/MiBioGen/MiBioGen_QnbQTL_summary_genus.zip</a>                                                                                               |
| order. Actinomycetales. id. 420               | order  | 2    | EU  | 18, 340  | NA      | NA       | MiBioGen Consortium   | <a href="https://molgenis26.gcc.rug.nl/downloads/MiBioGen/MiBioGen_QnbQTL_summary_order.zip">https://molgenis26.gcc.rug.nl/downloads/MiBioGen/MiBioGen_QnbQTL_summary_order.zip</a>                                                                                               |
| order. Bacillales. id. 1674                   | order  | 0    | EU  | 18, 340  | NA      | NA       | MiBioGen Consortium   | <a href="https://molgenis26.gcc.rug.nl/downloads/MiBioGen/MiBioGen_QnbQTL_summary_order.zip">https://molgenis26.gcc.rug.nl/downloads/MiBioGen/MiBioGen_QnbQTL_summary_order.zip</a>                                                                                               |
| order. Bacteroidales. id. 913                 | order  | 6    | EU  | 18, 340  | NA      | NA       | MiBioGen Consortium   | <a href="https://molgenis26.gcc.rug.nl/downloads/MiBioGen/MiBioGen_QnbQTL_summary_order.zip">https://molgenis26.gcc.rug.nl/downloads/MiBioGen/MiBioGen_QnbQTL_summary_order.zip</a>                                                                                               |
| order. Bifidobacteriales. id. 432             | order  | 8    | EU  | 18, 340  | NA      | NA       | MiBioGen Consortium   | <a href="https://molgenis26.gcc.rug.nl/downloads/MiBioGen/MiBioGen_QnbQTL_summary_order.zip">https://molgenis26.gcc.rug.nl/downloads/MiBioGen/MiBioGen_QnbQTL_summary_order.zip</a>                                                                                               |
| order. Burkholderiales. id. 2874              | order  | 8    | EU  | 18, 340  | NA      | NA       | MiBioGen Consortium   | <a href="https://molgenis26.gcc.rug.nl/downloads/MiBioGen/MiBioGen_QnbQTL_summary_order.zip">https://molgenis26.gcc.rug.nl/downloads/MiBioGen/MiBioGen_QnbQTL_summary_order.zip</a>                                                                                               |
| order. Clostridiales. id. 1863                | order  | 8    | EU  | 18, 340  | NA      | NA       | MiBioGen Consortium   | <a href="https://molgenis26.gcc.rug.nl/downloads/MiBioGen/MiBioGen_QnbQTL_summary_order.zip">https://molgenis26.gcc.rug.nl/downloads/MiBioGen/MiBioGen_QnbQTL_summary_order.zip</a>                                                                                               |
| order. Coriobacteriales. id. 810              | order  | 8    | EU  | 18, 340  | NA      | NA       | MiBioGen Consortium   | <a href="https://molgenis26.gcc.rug.nl/downloads/MiBioGen/MiBioGen_QnbQTL_summary_order.zip">https://molgenis26.gcc.rug.nl/downloads/MiBioGen/MiBioGen_QnbQTL_summary_order.zip</a>                                                                                               |
| order. Desulfotomaculum. id. 3156             | order  | 8    | EU  | 18, 340  | NA      | NA       | MiBioGen Consortium   | <a href="https://molgenis26.gcc.rug.nl/downloads/MiBioGen/MiBioGen_QnbQTL_summary_order.zip">https://molgenis26.gcc.rug.nl/downloads/MiBioGen/MiBioGen_QnbQTL_summary_order.zip</a>                                                                                               |
| order. Enterobacteriales. id. 3468            | order  | 2    | EU  | 18, 340  | NA      | NA       | MiBioGen Consortium   | <a href="https://molgenis26.gcc.rug.nl/downloads/MiBioGen/MiBioGen_QnbQTL_summary_order.zip">https://molgenis26.gcc.rug.nl/downloads/MiBioGen/MiBioGen_QnbQTL_summary_order.zip</a>                                                                                               |
| order. Erysipelotrichales. id. 2148           | order  | 6    | EU  | 18, 340  | NA      | NA       | MiBioGen Consortium   | <a href="https://molgenis26.gcc.rug.nl/downloads/MiBioGen/MiBioGen_QnbQTL_summary_order.zip">https://molgenis26.gcc.rug.nl/downloads/MiBioGen/MiBioGen_QnbQTL_summary_order.zip</a>                                                                                               |
| order. Gastranaerophilales. id. 1591          | order  | 4    | EU  | 18, 340  | NA      | NA       | MiBioGen Consortium   | <a href="https://molgenis26.gcc.rug.nl/downloads/MiBioGen/MiBioGen_QnbQTL_summary_order.zip">https://molgenis26.gcc.rug.nl/downloads/MiBioGen/MiBioGen_QnbQTL_summary_order.zip</a>                                                                                               |
| order. Lactobacillales. id. 1800              | order  | 6    | EU  | 18, 340  | NA      | NA       | MiBioGen Consortium   | <a href="https://molgenis26.gcc.rug.nl/downloads/MiBioGen/MiBioGen_QnbQTL_summary_order.zip">https://molgenis26.gcc.rug.nl/downloads/MiBioGen/MiBioGen_QnbQTL_summary_order.zip</a>                                                                                               |
| order. Methanobacteriales. id. 120            | order  | 6    | EU  | 18, 340  | NA      | NA       | MiBioGen Consortium   | <a href="https://molgenis26.gcc.rug.nl/downloads/MiBioGen/MiBioGen_QnbQTL_summary_order.zip">https://molgenis26.gcc.rug.nl/downloads/MiBioGen/MiBioGen_QnbQTL_summary_order.zip</a>                                                                                               |
| order. MollicutesR9. id. 11579                | order  | 2    | EU  | 18, 340  | NA      | NA       | MiBioGen Consortium   | <a href="https://molgenis26.gcc.rug.nl/downloads/MiBioGen/MiBioGen_QnbQTL_summary_order.zip">https://molgenis26.gcc.rug.nl/downloads/MiBioGen/MiBioGen_QnbQTL_summary_order.zip</a>                                                                                               |
| order. NB1n. id. 3953                         | order  | 10   | EU  | 18, 340  | NA      | NA       | MiBioGen Consortium   | <a href="https://molgenis26.gcc.rug.nl/downloads/MiBioGen/MiBioGen_QnbQTL_summary_order.zip">https://molgenis26.gcc.rug.nl/downloads/MiBioGen/MiBioGen_QnbQTL_summary_order.zip</a>                                                                                               |
| order. Pasteurellales. id. 3688               | order  | 8    | EU  | 18, 340  | NA      | NA       | MiBioGen Consortium   | <a href="https://molgenis26.gcc.rug.nl/downloads/MiBioGen/MiBioGen_QnbQTL_summary_order.zip">https://molgenis26.gcc.rug.nl/downloads/MiBioGen/MiBioGen_QnbQTL_summary_order.zip</a>                                                                                               |
| order. Rhodospirillales. id. 2667             | order  | 4    | EU  | 18, 340  | NA      | NA       | MiBioGen Consortium   | <a href="https://molgenis26.gcc.rug.nl/downloads/MiBioGen/MiBioGen_QnbQTL_summary_order.zip">https://molgenis26.gcc.rug.nl/downloads/MiBioGen/MiBioGen_QnbQTL_summary_order.zip</a>                                                                                               |
| order. Selenomonadales. id. 2165              | order  | 4    | EU  | 18, 340  | NA      | NA       | MiBioGen Consortium   | <a href="https://molgenis26.gcc.rug.nl/downloads/MiBioGen/MiBioGen_QnbQTL_summary_order.zip">https://molgenis26.gcc.rug.nl/downloads/MiBioGen/MiBioGen_QnbQTL_summary_order.zip</a>                                                                                               |
| order. Verrucomicrobiales. id. 4030           | order  | 2    | EU  | 18, 340  | NA      | NA       | MiBioGen Consortium   | <a href="https://molgenis26.gcc.rug.nl/downloads/MiBioGen/MiBioGen_QnbQTL_summary_order.zip">https://molgenis26.gcc.rug.nl/downloads/MiBioGen/MiBioGen_QnbQTL_summary_order.zip</a>                                                                                               |
| order. Victivallales. id. 2254                | order  | 6    | EU  | 18, 340  | NA      | NA       | MiBioGen Consortium   | <a href="https://molgenis26.gcc.rug.nl/downloads/MiBioGen/MiBioGen_QnbQTL_summary_order.zip">https://molgenis26.gcc.rug.nl/downloads/MiBioGen/MiBioGen_QnbQTL_summary_order.zip</a>                                                                                               |
| phylum. Actinobacteria. id. 400               | phylum | 14   | EU  | 18, 340  | NA      | NA       | MiBioGen Consortium   | <a href="https://molgenis26.gcc.rug.nl/downloads/MiBioGen/MiBioGen_QnbQTL_summary_phylum.zip">https://molgenis26.gcc.rug.nl/downloads/MiBioGen/MiBioGen_QnbQTL_summary_phylum.zip</a>                                                                                             |
| phylum. Bacteroidetes. id. 905                | phylum | 6    | EU  | 18, 340  | NA      | NA       | MiBioGen Consortium   | <a href="https://molgenis27.gcc.rug.nl/downloads/MiBioGen/MiBioGen_QnbQTL_summary_phylum.zip">https://molgenis27.gcc.rug.nl/downloads/MiBioGen/MiBioGen_QnbQTL_summary_phylum.zip</a>                                                                                             |
| phylum. Cyanobacteria. id. 1500               | phylum | 8    | EU  | 18, 340  | NA      | NA       | MiBioGen Consortium   | <a href="https://molgenis28.gcc.rug.nl/downloads/MiBioGen/MiBioGen_QnbQTL_summary_phylum.zip">https://molgenis28.gcc.rug.nl/downloads/MiBioGen/MiBioGen_QnbQTL_summary_phylum.zip</a>                                                                                             |
| phylum. Euryarchaeota. id. 55                 | phylum | 4    | EU  | 18, 340  | NA      | NA       | MiBioGen Consortium   | <a href="https://molgenis29.gcc.rug.nl/downloads/MiBioGen/MiBioGen_QnbQTL_summary_phylum.zip">https://molgenis29.gcc.rug.nl/downloads/MiBioGen/MiBioGen_QnbQTL_summary_phylum.zip</a>                                                                                             |
| phylum. Firmicutes. id. 1672                  | phylum | 6    | EU  | 18, 340  | NA      | NA       | MiBioGen Consortium   | <a href="https://molgenis30.gcc.rug.nl/downloads/MiBioGen/MiBioGen_QnbQTL_summary_phylum.zip">https://molgenis30.gcc.rug.nl/downloads/MiBioGen/MiBioGen_QnbQTL_summary_phylum.zip</a>                                                                                             |
| phylum. Lentisphaerae. id. 2238               | phylum | 6    | EU  | 18, 340  | NA      | NA       | MiBioGen Consortium   | <a href="https://molgenis31.gcc.rug.nl/downloads/MiBioGen/MiBioGen_QnbQTL_summary_phylum.zip">https://molgenis31.gcc.rug.nl/downloads/MiBioGen/MiBioGen_QnbQTL_summary_phylum.zip</a>                                                                                             |
| phylum. Proteobacteria. id. 2375              | phylum | 2    | EU  | 18, 340  | NA      | NA       | MiBioGen Consortium   | <a href="https://molgenis32.gcc.rug.nl/downloads/MiBioGen/MiBioGen_QnbQTL_summary_phylum.zip">https://molgenis32.gcc.rug.nl/downloads/MiBioGen/MiBioGen_QnbQTL_summary_phylum.zip</a>                                                                                             |
| phylum. Tenericutes. id. 3919                 | phylum | 4    | EU  | 18, 340  | NA      | NA       | MiBioGen Consortium   | <a href="https://molgenis33.gcc.rug.nl/downloads/MiBioGen/MiBioGen_QnbQTL_summary_phylum.zip">https://molgenis33.gcc.rug.nl/downloads/MiBioGen/MiBioGen_QnbQTL_summary_phylum.zip</a>                                                                                             |
| phylum. Verrucomicrobia. id. 3982             | phylum | 4    | EU  | 18, 340  | NA      | NA       | MiBioGen Consortium   | <a href="https://molgenis34.gcc.rug.nl/downloads/MiBioGen/MiBioGen_QnbQTL_summary_phylum.zip">https://molgenis34.gcc.rug.nl/downloads/MiBioGen/MiBioGen_QnbQTL_summary_phylum.zip</a>                                                                                             |
| total                                         |        | 1032 |     |          |         |          |                       |                                                                                                                                                                                                                                                                                   |
| Stroke                                        | Stroke | 37   | EAS | 264, 655 | 27, 413 | 237, 242 | GIGASTROKE Consortium | <a href="http://ftp.ebi.ac.uk/pub/databases/gwas/summary_statistics/GCST90104001-GCST90105000/GCST90104546/GCST90104544_bui1d6RCh37.tsv.gz">http://ftp.ebi.ac.uk/pub/databases/gwas/summary_statistics/GCST90104001-GCST90105000/GCST90104546/GCST90104544_bui1d6RCh37.tsv.gz</a> |
| Ischemic Stroke                               | Stroke | 32   | EAS | 299, 342 | 62, 100 | 237, 242 | GIGASTROKE Consortium | <a href="http://ftp.ebi.ac.uk/pub/databases/gwas/summary_statistics/GCST90104001-GCST90105000/GCST90104546/GCST90104545_bui1d6RCh37.tsv.gz">http://ftp.ebi.ac.uk/pub/databases/gwas/summary_statistics/GCST90104001-GCST90105000/GCST90104546/GCST90104545_bui1d6RCh37.tsv.gz</a> |
| CardioEmbolic Stroke                          | Stroke | 9    | EAS | 238, 168 | 926     | 237, 242 | GIGASTROKE Consortium | <a href="http://ftp.ebi.ac.uk/pub/databases/gwas/summary_statistics/GCST90104001-GCST90105000/GCST90104546/GCST90104546_bui1d6RCh37.tsv.gz">http://ftp.ebi.ac.uk/pub/databases/gwas/summary_statistics/GCST90104001-GCST90105000/GCST90104546/GCST90104546_bui1d6RCh37.tsv.gz</a> |
| Small Vessel Stroke                           | Stroke | 22   | EAS | 242, 774 | 5, 532  | 237, 242 | GIGASTROKE Consortium | <a href="http://ftp.ebi.ac.uk/pub/databases/gwas/summary_statistics/GCST90104001-GCST90105000/GCST90104546/GCST90104547_bui1d6RCh37.tsv.gz">http://ftp.ebi.ac.uk/pub/databases/gwas/summary_statistics/GCST90104001-GCST90105000/GCST90104546/GCST90104547_bui1d6RCh37.tsv.gz</a> |
| Large Artery Stroke                           | Stroke | 18   | EAS | 238, 977 | 1, 735  | 237, 242 | GIGASTROKE Consortium | <a href="http://ftp.ebi.ac.uk/pub/databases/gwas/summary_statistics/GCST90104001-GCST90105000/GCST90104546/GCST90104548_bui1d6RCh37.tsv.gz">http://ftp.ebi.ac.uk/pub/databases/gwas/summary_statistics/GCST90104001-GCST90105000/GCST90104546/GCST90104548_bui1d6RCh37.tsv.gz</a> |
| total                                         |        | 118  |     |          |         |          |                       |                                                                                                                                                                                                                                                                                   |
| Stroke                                        | Stroke | EU   |     | 310, 894 | 73, 652 | 237, 242 | GIGASTROKE Consortium | <a href="http://ftp.ebi.ac.uk/pub/databases/gwas/summary_statistics/GCST90104001-GCST90105000/GCST90104539/GCST90104539_bui1d6RCh37.tsv.gz">http://ftp.ebi.ac.uk/pub/databases/gwas/summary_statistics/GCST90104001-GCST90105000/GCST90104539/GCST90104539_bui1d6RCh37.tsv.gz</a> |
| Ischemic Stroke                               | Stroke | EU   |     | 256, 274 | 19, 032 | 237, 242 | GIGASTROKE Consortium | <a href="http://ftp.ebi.ac.uk/pub/databases/gwas/summary_statistics/GCST90104001-GCST90105000/GCST90104539/GCST90104540_bui1d6RCh37.tsv.gz">http://ftp.ebi.ac.uk/pub/databases/gwas/summary_statistics/GCST90104001-GCST90105000/GCST90104539/GCST90104540_bui1d6RCh37.tsv.gz</a> |
| CardioEmbolic Stroke                          | Stroke | EU   |     | 248, 046 | 10, 804 | 237, 242 | GIGASTROKE Consortium | <a href="http://ftp.ebi.ac.uk/pub/databases/gwas/summary_statistics/GCST90104001-GCST90105000/GCST90104539/GCST90104541_bui1d6RCh37.tsv.gz">http://ftp.ebi.ac.uk/pub/databases/gwas/summary_statistics/GCST90104001-GCST90105000/GCST90104539/GCST90104541_bui1d6RCh37.tsv.gz</a> |
| Small Vessel Stroke                           | Stroke | EU   |     | 244, 053 | 6, 811  | 237, 242 | GIGASTROKE Consortium | <a href="http://ftp.ebi.ac.uk/pub/databases/gwas/summary_statistics/GCST90104001-GCST90105000/GCST90104539/GCST90104542_bui1d6RCh37.tsv.gz">http://ftp.ebi.ac.uk/pub/databases/gwas/summary_statistics/GCST90104001-GCST90105000/GCST90104539/GCST90104542_bui1d6RCh37.tsv.gz</a> |
| Large Artery Stroke                           | Stroke | EU   |     | 243, 641 | 6, 399  | 237, 242 | GIGASTROKE Consortium | <a href="http://ftp.ebi.ac.uk/pub/databases/gwas/summary_statistics/GCST90104001-GCST90105000/GCST90104539/GCST90104543_bui1d6RCh37.tsv.gz">http://ftp.ebi.ac.uk/pub/databases/gwas/summary_statistics/GCST90104001-GCST90105000/GCST90104539/GCST90104543_bui1d6RCh37.tsv.gz</a> |
| total                                         |        | 79   |     |          |         |          |                       |                                                                                                                                                                                                                                                                                   |









Table.S2.Mendelian Randomization result for gut microbiome to stoke in EAS

| exposure | outcome             | method                    | nsnp | OR     | lower 95CI | upper 95CI | pval   | egger   | intercept | pleio se | pleio p | Q       | Q pval   | sensitivity ratio |
|----------|---------------------|---------------------------|------|--------|------------|------------|--------|---------|-----------|----------|---------|---------|----------|-------------------|
| MF0001   | CardioEmbolicStroke | MR Egger                  | 12   | 0.5395 | 0.1412     | 2.0615     | 0.3882 |         | 0.0216    | 0.0486   | 0.6658  | 10.9912 | 0.3582   | 1.2033            |
| MF0001   | CardioEmbolicStroke | Weighted median           | 12   | 0.7318 | 0.3386     | 1.5818     | 0.4272 |         | 0.0216    | 0.0486   | 0.6658  | 10.9912 | 0.3582   | 1.2033            |
| MF0001   | CardioEmbolicStroke | Inverse variance weighted | 12   | 0.7110 | 0.4124     | 1.2255     | 0.2195 |         | 0.0216    | 0.0486   | 0.6658  | 10.9912 | 0.3582   | 1.2033            |
| MF0001   | CardioEmbolicStroke | Simple mode               | 12   | 0.6743 | 0.1949     | 2.3334     | 0.5465 |         | 0.0216    | 0.0486   | 0.6658  | 10.9912 | 0.3582   | 1.2033            |
| MF0001   | CardioEmbolicStroke | Weighted mode             | 12   | 0.5791 | 0.1836     | 1.8271     | 0.3714 |         | 0.0216    | 0.0486   | 0.6658  | 10.9912 | 0.3582   | 1.2033            |
| MF0001   | IschemicStroke      | MR Egger                  | 20   | 1.0417 | 0.8792     | 1.2341     | 0.6427 | -0.0007 | 0.0078    | 0.9243   | 16.2831 | 0.5728  | 176.9380 |                   |
| MF0001   | IschemicStroke      | Weighted median           | 20   | 1.1085 | 0.9776     | 1.2569     | 0.1081 | -0.0007 | 0.0078    | 0.9243   | 16.2831 | 0.5728  | 176.9380 |                   |
| MF0001   | IschemicStroke      | Inverse variance weighted | 20   | 1.0344 | 0.9420     | 1.1359     | 0.4782 | -0.0007 | 0.0078    | 0.9243   | 16.2831 | 0.5728  | 176.9380 |                   |
| MF0001   | IschemicStroke      | Simple mode               | 20   | 1.1250 | 0.8956     | 1.4131     | 0.3240 | -0.0007 | 0.0078    | 0.9243   | 16.2831 | 0.5728  | 176.9380 |                   |
| MF0001   | IschemicStroke      | Weighted mode             | 20   | 1.1316 | 0.9467     | 1.3525     | 0.1902 | -0.0007 | 0.0078    | 0.9243   | 16.2831 | 0.5728  | 176.9380 |                   |
| MF0001   | LargeArteryStroke   | MR Egger                  | 16   | 0.8763 | 0.3715     | 2.0670     | 0.7673 |         | 0.0113    | 0.0339   | 0.7444  | 16.3978 | 0.2897   | 1.1084            |
| MF0001   | LargeArteryStroke   | Weighted median           | 16   | 1.0558 | 0.6449     | 1.7284     | 0.8291 |         | 0.0113    | 0.0339   | 0.7444  | 16.3978 | 0.2897   | 1.1084            |
| MF0001   | LargeArteryStroke   | Inverse variance weighted | 16   | 0.9979 | 0.6853     | 1.4530     | 0.9911 |         | 0.0113    | 0.0339   | 0.7444  | 16.3978 | 0.2897   | 1.1084            |
| MF0001   | LargeArteryStroke   | Simple mode               | 16   | 1.1028 | 0.5023     | 2.4213     | 0.8106 |         | 0.0113    | 0.0339   | 0.7444  | 16.3978 | 0.2897   | 1.1084            |
| MF0001   | LargeArteryStroke   | Weighted mode             | 16   | 1.1028 | 0.5811     | 2.0930     | 0.7687 |         | 0.0113    | 0.0339   | 0.7444  | 16.3978 | 0.2897   | 1.1084            |
| MF0001   | SmallVesselStroke   | MR Egger                  | 17   | 1.1796 | 0.8171     | 1.7029     | 0.3919 | 0.0005  | 0.0155    | 0.9745   | 14.2103 | 0.5096  | 23.8370  |                   |
| MF0001   | SmallVesselStroke   | Weighted median           | 17   | 1.3009 | 0.9922     | 1.7055     | 0.0570 | 0.0005  | 0.0155    | 0.9745   | 14.2103 | 0.5096  | 23.8370  |                   |
| MF0001   | SmallVesselStroke   | Inverse variance weighted | 17   | 1.1858 | 0.9852     | 1.4272     | 0.0715 | 0.0005  | 0.0155    | 0.9745   | 14.2103 | 0.5096  | 23.8370  |                   |
| MF0001   | SmallVesselStroke   | Simple mode               | 17   | 1.2073 | 0.7679     | 1.8979     | 0.4265 | 0.0005  | 0.0155    | 0.9745   | 14.2103 | 0.5096  | 23.8370  |                   |
| MF0001   | SmallVesselStroke   | Weighted mode             | 17   | 1.3121 | 0.9011     | 1.9105     | 0.1757 | 0.0005  | 0.0155    | 0.9745   | 14.2103 | 0.5096  | 23.8370  |                   |
| MF0001   | Stroke              | MR Egger                  | 18   | 0.9365 | 0.7730     | 1.1344     | 0.5118 | 0.0052  | 0.0078    | 0.5192   | 15.4389 | 0.4928  | 78.3685  |                   |
| MF0001   | Stroke              | Weighted median           | 18   | 1.0588 | 0.9350     | 1.1991     | 0.3678 | 0.0052  | 0.0078    | 0.5192   | 15.4389 | 0.4928  | 78.3685  |                   |
| MF0001   | Stroke              | Inverse variance weighted | 18   | 0.9913 | 0.9056     | 1.0850     | 0.8491 | 0.0052  | 0.0078    | 0.5192   | 15.4389 | 0.4928  | 78.3685  |                   |
| MF0001   | Stroke              | Simple mode               | 18   | 1.0998 | 0.8791     | 1.3758     | 0.4168 | 0.0052  | 0.0078    | 0.5192   | 15.4389 | 0.4928  | 78.3685  |                   |
| MF0001   | Stroke              | Weighted mode             | 18   | 1.0853 | 0.8948     | 1.3165     | 0.4173 | 0.0052  | 0.0078    | 0.5192   | 15.4389 | 0.4928  | 78.3685  |                   |
| MF0002   | CardioEmbolicStroke | MR Egger                  | 8    | 0.3964 | 0.0220     | 7.1489     | 0.5537 | 0.0622  | 0.1413    | 0.6754   | 7.4207  | 0.2837  | 1.8557   |                   |
| MF0002   | CardioEmbolicStroke | Weighted median           | 8    | 0.9203 | 0.5182     | 1.6344     | 0.7769 | 0.0622  | 0.1413    | 0.6754   | 7.4207  | 0.2837  | 1.8557   |                   |
| MF0002   | CardioEmbolicStroke | Inverse variance weighted | 8    | 0.7520 | 0.4820     | 1.1734     | 0.2093 | 0.0622  | 0.1413    | 0.6754   | 7.4207  | 0.2837  | 1.8557   |                   |
| MF0002   | CardioEmbolicStroke | Simple mode               | 8    | 0.9576 | 0.4192     | 2.1875     | 0.9210 | 0.0622  | 0.1413    | 0.6754   | 7.4207  | 0.2837  | 1.8557   |                   |
| MF0002   | CardioEmbolicStroke | Weighted mode             | 8    | 0.9576 | 0.4847     | 1.8920     | 0.9043 | 0.0622  | 0.1413    | 0.6754   | 7.4207  | 0.2837  | 1.8557   |                   |
| MF0002   | IschemicStroke      | MR Egger                  | 9    | 0.8691 | 0.4925     | 1.5337     | 0.6431 | 0.0033  | 0.0283    | 0.9101   | 9.0736  | 0.2474  | 35.1987  |                   |
| MF0002   | IschemicStroke      | Weighted median           | 9    | 0.9056 | 0.7900     | 1.0381     | 0.1547 | 0.0033  | 0.0283    | 0.9101   | 9.0736  | 0.2474  | 35.1987  |                   |
| MF0002   | IschemicStroke      | Inverse variance weighted | 9    | 0.8985 | 0.8109     | 0.9957     | 0.0411 | 0.0033  | 0.0283    | 0.9101   | 9.0736  | 0.2474  | 35.1987  |                   |
| MF0002   | IschemicStroke      | Simple mode               | 9    | 0.8823 | 0.7254     | 1.0733     | 0.2459 | 0.0033  | 0.0283    | 0.9101   | 9.0736  | 0.2474  | 35.1987  |                   |
| MF0002   | IschemicStroke      | Weighted mode             | 9    | 0.8843 | 0.7395     | 1.0576     | 0.2150 | 0.0033  | 0.0283    | 0.9101   | 9.0736  | 0.2474  | 35.1987  |                   |
| MF0002   | LargeArteryStroke   | MR Egger                  | 8    | 1.6377 | 0.2347     | 11.4302    | 0.6364 | -0.0690 | 0.0949    | 0.4944   | 4.5912  | 0.5972  | 6.6593   |                   |
| MF0002   | LargeArteryStroke   | Weighted median           | 8    | 0.8441 | 0.5586     | 1.2755     | 0.4210 | -0.0690 | 0.0949    | 0.4944   | 4.5912  | 0.5972  | 6.6593   |                   |
| MF0002   | LargeArteryStroke   | Inverse variance weighted | 8    | 0.8042 | 0.5851     | 1.1053     | 0.1792 | -0.0690 | 0.0949    | 0.4944   | 4.5912  | 0.5972  | 6.6593   |                   |
| MF0002   | LargeArteryStroke   | Simple mode               | 8    | 0.8175 | 0.4206     | 1.5887     | 0.5709 | -0.0690 | 0.0949    | 0.4944   | 4.5912  | 0.5972  | 6.6593   |                   |
| MF0002   | LargeArteryStroke   | Weighted mode             | 8    | 0.9574 | 0.5193     | 1.7653     | 0.8931 | -0.0690 | 0.0949    | 0.4944   | 4.5912  | 0.5972  | 6.6593   |                   |
| MF0002   | SmallVesselStroke   | MR Egger                  | 8    | 1.2966 | 0.3439     | 4.8883     | 0.7145 | -0.0387 | 0.0649    | 0.5732   | 9.0494  | 0.1708  | 13.7753  |                   |
| MF0002   | SmallVesselStroke   | Weighted median           | 8    | 0.8671 | 0.6732     | 1.1168     | 0.2694 | -0.0387 | 0.0649    | 0.5732   | 9.0494  | 0.1708  | 13.7753  |                   |
| MF0002   | SmallVesselStroke   | Inverse variance weighted | 8    | 0.8710 | 0.7079     | 1.0718     | 0.1920 | -0.0387 | 0.0649    | 0.5732   | 9.0494  | 0.1708  | 13.7753  |                   |
| MF0002   | SmallVesselStroke   | Simple mode               | 8    | 1.0883 | 0.7118     | 1.6639     | 0.7078 | -0.0387 | 0.0649    | 0.5732   | 9.0494  | 0.1708  | 13.7753  |                   |
| MF0002   | SmallVesselStroke   | Weighted mode             | 8    | 1.0600 | 0.6803     | 1.6517     | 0.8043 | -0.0387 | 0.0649    | 0.5732   | 9.0494  | 0.1708  | 13.7753  |                   |
| MF0002   | Stroke              | MR Egger                  | 10   | 0.9102 | 0.6175     | 1.3414     | 0.6470 | -0.0007 | 0.0195    | 0.9723   | 7.3684  | 0.4975  | 37.8931  |                   |
| MF0002   | Stroke              | Weighted median           | 10   | 0.8874 | 0.7978     | 0.9870     | 0.0278 | -0.0007 | 0.0195    | 0.9723   | 7.3684  | 0.4975  | 37.8931  |                   |
| MF0002   | Stroke              | Inverse variance weighted | 10   | 0.9039 | 0.8351     | 0.9783     | 0.0123 | -0.0007 | 0.0195    | 0.9723   | 7.3684  | 0.4975  | 37.8931  |                   |
| MF0002   | Stroke              | Simple mode               | 10   | 0.8338 | 0.7069     | 0.9834     | 0.0592 | -0.0007 | 0.0195    | 0.9723   | 7.3684  | 0.4975  | 37.8931  |                   |
| MF0002   | Stroke              | Weighted mode             | 10   | 0.8496 | 0.7347     | 0.9824     | 0.0554 | -0.0007 | 0.0195    | 0.9723   | 7.3684  | 0.4975  | 37.8931  |                   |

|        |                     |                           |    |        |        |        |        |         |        |        |         |        |            |
|--------|---------------------|---------------------------|----|--------|--------|--------|--------|---------|--------|--------|---------|--------|------------|
| MF0003 | CardioEmbolicStroke | MR Egger                  | 4  | #####  | 0.0000 | #####  | 0.4965 | -0.4613 | 0.5596 | 0.4964 | 4.8918  | 0.0866 | 1.7304     |
| MF0003 | CardioEmbolicStroke | Weighted median           | 4  | 0.6002 | 0.1792 | 2.0100 | 0.4077 | -0.4613 | 0.5596 | 0.4964 | 4.8918  | 0.0866 | 1.7304     |
| MF0003 | CardioEmbolicStroke | Inverse variance weighted | 4  | 1.0235 | 0.2502 | 4.1872 | 0.9742 | -0.4613 | 0.5596 | 0.4964 | 4.8918  | 0.0866 | 1.7304     |
| MF0003 | CardioEmbolicStroke | Simple mode               | 4  | 0.4905 | 0.0924 | 2.6030 | 0.4643 | -0.4613 | 0.5596 | 0.4964 | 4.8918  | 0.0866 | 1.7304     |
| MF0003 | CardioEmbolicStroke | Weighted mode             | 4  | 0.4800 | 0.1053 | 2.1872 | 0.4128 | -0.4613 | 0.5596 | 0.4964 | 4.8918  | 0.0866 | 1.7304     |
| MF0003 | IschemicStroke      | MR Egger                  | 20 | 0.9599 | 0.8488 | 1.0855 | 0.5221 | 0.0106  | 0.0088 | 0.2434 | 15.4530 | 0.6934 | 81333.3631 |
| MF0003 | IschemicStroke      | Weighted median           | 20 | 1.0010 | 0.8959 | 1.1184 | 0.9860 | 0.0106  | 0.0088 | 0.2434 | 15.4530 | 0.6934 | 81333.3631 |
| MF0003 | IschemicStroke      | Inverse variance weighted | 20 | 1.0182 | 0.9427 | 1.0997 | 0.6467 | 0.0106  | 0.0088 | 0.2434 | 15.4530 | 0.6934 | 81333.3631 |
| MF0003 | IschemicStroke      | Simple mode               | 20 | 1.0185 | 0.8543 | 1.2142 | 0.8402 | 0.0106  | 0.0088 | 0.2434 | 15.4530 | 0.6934 | 81333.3631 |
| MF0003 | IschemicStroke      | Weighted mode             | 20 | 0.9889 | 0.8609 | 1.1359 | 0.8761 | 0.0106  | 0.0088 | 0.2434 | 15.4530 | 0.6934 | 81333.3631 |
| MF0003 | LargeArteryStroke   | MR Egger                  | 12 | 0.4923 | 0.2468 | 0.9820 | 0.0720 | 0.0638  | 0.0415 | 0.1551 | 21.6797 | 0.0270 | 1.1932     |
| MF0003 | LargeArteryStroke   | Weighted median           | 12 | 0.6046 | 0.3766 | 0.9704 | 0.0371 | 0.0638  | 0.0415 | 0.1551 | 21.6797 | 0.0270 | 1.1932     |
| MF0003 | LargeArteryStroke   | Inverse variance weighted | 12 | 0.7548 | 0.4813 | 1.1837 | 0.2204 | 0.0638  | 0.0415 | 0.1551 | 21.6797 | 0.0270 | 1.1932     |
| MF0003 | LargeArteryStroke   | Simple mode               | 12 | 0.9139 | 0.4553 | 1.8341 | 0.8046 | 0.0638  | 0.0415 | 0.1551 | 21.6797 | 0.0270 | 1.1932     |
| MF0003 | LargeArteryStroke   | Weighted mode             | 12 | 0.6142 | 0.3772 | 1.0001 | 0.0759 | 0.0638  | 0.0415 | 0.1551 | 21.6797 | 0.0270 | 1.1932     |
| MF0003 | SmallVesselStroke   | MR Egger                  | 13 | 0.8715 | 0.6395 | 1.1878 | 0.4026 | 0.0218  | 0.0179 | 0.2481 | 10.2030 | 0.5982 | 43.8210    |
| MF0003 | SmallVesselStroke   | Weighted median           | 13 | 0.9720 | 0.7582 | 1.2461 | 0.8228 | 0.0218  | 0.0179 | 0.2481 | 10.2030 | 0.5982 | 43.8210    |
| MF0003 | SmallVesselStroke   | Inverse variance weighted | 13 | 1.0181 | 0.8479 | 1.2225 | 0.8476 | 0.0218  | 0.0179 | 0.2481 | 10.2030 | 0.5982 | 43.8210    |
| MF0003 | SmallVesselStroke   | Simple mode               | 13 | 0.9767 | 0.6960 | 1.3708 | 0.8940 | 0.0218  | 0.0179 | 0.2481 | 10.2030 | 0.5982 | 43.8210    |
| MF0003 | SmallVesselStroke   | Weighted mode             | 13 | 0.9663 | 0.7405 | 1.2608 | 0.8048 | 0.0218  | 0.0179 | 0.2481 | 10.2030 | 0.5982 | 43.8210    |
| MF0003 | Stroke              | MR Egger                  | 16 | 0.8966 | 0.7687 | 1.0459 | 0.1866 | 0.0147  | 0.0087 | 0.1144 | 16.0693 | 0.3775 | 189.6491   |
| MF0003 | Stroke              | Weighted median           | 16 | 0.9319 | 0.8232 | 1.0551 | 0.2656 | 0.0147  | 0.0087 | 0.1144 | 16.0693 | 0.3775 | 189.6491   |
| MF0003 | Stroke              | Inverse variance weighted | 16 | 1.0013 | 0.9171 | 1.0931 | 0.9774 | 0.0147  | 0.0087 | 0.1144 | 16.0693 | 0.3775 | 189.6491   |
| MF0003 | Stroke              | Simple mode               | 16 | 0.9046 | 0.7408 | 1.1047 | 0.3411 | 0.0147  | 0.0087 | 0.1144 | 16.0693 | 0.3775 | 189.6491   |
| MF0003 | Stroke              | Weighted mode             | 16 | 0.9009 | 0.7633 | 1.0632 | 0.2359 | 0.0147  | 0.0087 | 0.1144 | 16.0693 | 0.3775 | 189.6491   |
| MF0004 | CardioEmbolicStroke | MR Egger                  | 14 | 1.1905 | 0.3661 | 3.8716 | 0.7769 | 0.0147  | 0.0389 | 0.7131 | 7.4585  | 0.8259 | 2.0823     |
| MF0004 | CardioEmbolicStroke | Weighted median           | 14 | 1.2693 | 0.5684 | 2.8341 | 0.5607 | 0.0147  | 0.0389 | 0.7131 | 7.4585  | 0.8259 | 2.0823     |
| MF0004 | CardioEmbolicStroke | Inverse variance weighted | 14 | 1.4537 | 0.8329 | 2.5371 | 0.1880 | 0.0147  | 0.0389 | 0.7131 | 7.4585  | 0.8259 | 2.0823     |
| MF0004 | CardioEmbolicStroke | Simple mode               | 14 | 1.0646 | 0.3549 | 3.1932 | 0.9128 | 0.0147  | 0.0389 | 0.7131 | 7.4585  | 0.8259 | 2.0823     |
| MF0004 | CardioEmbolicStroke | Weighted mode             | 14 | 1.1424 | 0.4274 | 3.0534 | 0.7949 | 0.0147  | 0.0389 | 0.7131 | 7.4585  | 0.8259 | 2.0823     |
| MF0004 | IschemicStroke      | MR Egger                  | 29 | 1.0469 | 0.9078 | 1.2073 | 0.5342 | 0.0047  | 0.0066 | 0.4858 | 28.7294 | 0.3741 | 1073.4112  |
| MF0004 | IschemicStroke      | Weighted median           | 29 | 1.1224 | 0.9956 | 1.2654 | 0.0589 | 0.0047  | 0.0066 | 0.4858 | 28.7294 | 0.3741 | 1073.4112  |
| MF0004 | IschemicStroke      | Inverse variance weighted | 29 | 1.0904 | 1.0005 | 1.1884 | 0.0487 | 0.0047  | 0.0066 | 0.4858 | 28.7294 | 0.3741 | 1073.4112  |
| MF0004 | IschemicStroke      | Simple mode               | 29 | 1.1806 | 0.9353 | 1.4903 | 0.1733 | 0.0047  | 0.0066 | 0.4858 | 28.7294 | 0.3741 | 1073.4112  |
| MF0004 | IschemicStroke      | Weighted mode             | 29 | 1.0027 | 0.8153 | 1.2332 | 0.9799 | 0.0047  | 0.0066 | 0.4858 | 28.7294 | 0.3741 | 1073.4112  |
| MF0004 | LargeArteryStroke   | MR Egger                  | 19 | 0.9493 | 0.4730 | 1.9052 | 0.8853 | -0.0146 | 0.0256 | 0.5753 | 15.7551 | 0.5413 | 3.2676     |
| MF0004 | LargeArteryStroke   | Weighted median           | 19 | 0.6096 | 0.3721 | 0.9986 | 0.0493 | -0.0146 | 0.0256 | 0.5753 | 15.7551 | 0.5413 | 3.2676     |
| MF0004 | LargeArteryStroke   | Inverse variance weighted | 19 | 0.7977 | 0.5571 | 1.1421 | 0.2171 | -0.0146 | 0.0256 | 0.5753 | 15.7551 | 0.5413 | 3.2676     |
| MF0004 | LargeArteryStroke   | Simple mode               | 19 | 0.6224 | 0.2817 | 1.3751 | 0.2563 | -0.0146 | 0.0256 | 0.5753 | 15.7551 | 0.5413 | 3.2676     |
| MF0004 | LargeArteryStroke   | Weighted mode             | 19 | 0.5848 | 0.3097 | 1.1042 | 0.1154 | -0.0146 | 0.0256 | 0.5753 | 15.7551 | 0.5413 | 3.2676     |
| MF0004 | SmallVesselStroke   | MR Egger                  | 19 | 1.3011 | 0.8659 | 1.9552 | 0.2222 | -0.0037 | 0.0149 | 0.8080 | 18.1254 | 0.3810 | 9.8863     |
| MF0004 | SmallVesselStroke   | Weighted median           | 19 | 1.4093 | 1.0645 | 1.8659 | 0.0166 | -0.0037 | 0.0149 | 0.8080 | 18.1254 | 0.3810 | 9.8863     |
| MF0004 | SmallVesselStroke   | Inverse variance weighted | 19 | 1.2449 | 1.0180 | 1.5224 | 0.0329 | -0.0037 | 0.0149 | 0.8080 | 18.1254 | 0.3810 | 9.8863     |
| MF0004 | SmallVesselStroke   | Simple mode               | 19 | 1.3665 | 0.8301 | 2.2498 | 0.2354 | -0.0037 | 0.0149 | 0.8080 | 18.1254 | 0.3810 | 9.8863     |
| MF0004 | SmallVesselStroke   | Weighted mode             | 19 | 1.4287 | 0.9989 | 2.0435 | 0.0664 | -0.0037 | 0.0149 | 0.8080 | 18.1254 | 0.3810 | 9.8863     |
| MF0004 | Stroke              | MR Egger                  | 23 | 1.0729 | 0.8627 | 1.3343 | 0.5337 | -0.0002 | 0.0078 | 0.9827 | 24.9480 | 0.2494 | 43.2167    |
| MF0004 | Stroke              | Weighted median           | 23 | 1.0770 | 0.9347 | 1.2409 | 0.3047 | -0.0002 | 0.0078 | 0.9827 | 24.9480 | 0.2494 | 43.2167    |
| MF0004 | Stroke              | Inverse variance weighted | 23 | 1.0706 | 0.9667 | 1.1858 | 0.1902 | -0.0002 | 0.0078 | 0.9827 | 24.9480 | 0.2494 | 43.2167    |
| MF0004 | Stroke              | Simple mode               | 23 | 1.1276 | 0.8655 | 1.4689 | 0.3832 | -0.0002 | 0.0078 | 0.9827 | 24.9480 | 0.2494 | 43.2167    |
| MF0004 | Stroke              | Weighted mode             | 23 | 1.1363 | 0.9058 | 1.4254 | 0.2812 | -0.0002 | 0.0078 | 0.9827 | 24.9480 | 0.2494 | 43.2167    |
| MF0005 | CardioEmbolicStroke | MR Egger                  | 5  | 1.0479 | 0.2591 | 4.2387 | 0.9518 | 0.0599  | 0.0871 | 0.5412 | 7.2501  | 0.0643 | 2.4942     |
| MF0005 | CardioEmbolicStroke | Weighted median           | 5  | 1.7719 | 0.9193 | 3.4152 | 0.0875 | 0.0599  | 0.0871 | 0.5412 | 7.2501  | 0.0643 | 2.4942     |
| MF0005 | CardioEmbolicStroke | Inverse variance weighted | 5  | 1.6002 | 0.8303 | 3.0842 | 0.1602 | 0.0599  | 0.0871 | 0.5412 | 7.2501  | 0.0643 | 2.4942     |

|        |                     |                           |    |        |        |         |        |         |        |        |         |        |             |
|--------|---------------------|---------------------------|----|--------|--------|---------|--------|---------|--------|--------|---------|--------|-------------|
| MF0005 | CardioEmbolicStroke | Simple mode               | 5  | 2.4495 | 0.8900 | 6.7415  | 0.1579 | 0.0599  | 0.0871 | 0.5412 | 7.2501  | 0.0643 | 2.4942      |
| MF0005 | CardioEmbolicStroke | Weighted mode             | 5  | 1.8808 | 0.8812 | 4.0142  | 0.1778 | 0.0599  | 0.0871 | 0.5412 | 7.2501  | 0.0643 | 2.4942      |
| MF0005 | IschemicStroke      | MR Egger                  | 11 | 0.9024 | 0.7767 | 1.0484  | 0.2124 | 0.0067  | 0.0106 | 0.5446 | 8.2732  | 0.5069 | 140.7156    |
| MF0005 | IschemicStroke      | Weighted median           | 11 | 0.9606 | 0.8589 | 1.0744  | 0.4820 | 0.0067  | 0.0106 | 0.5446 | 8.2732  | 0.5069 | 140.7156    |
| MF0005 | IschemicStroke      | Inverse variance weighted | 11 | 0.9397 | 0.8666 | 1.0190  | 0.1325 | 0.0067  | 0.0106 | 0.5446 | 8.2732  | 0.5069 | 140.7156    |
| MF0005 | IschemicStroke      | Simple mode               | 11 | 0.8932 | 0.7473 | 1.0676  | 0.2428 | 0.0067  | 0.0106 | 0.5446 | 8.2732  | 0.5069 | 140.7156    |
| MF0005 | IschemicStroke      | Weighted mode             | 11 | 0.9258 | 0.8085 | 1.0600  | 0.2902 | 0.0067  | 0.0106 | 0.5446 | 8.2732  | 0.5069 | 140.7156    |
| MF0005 | LargeArteryStroke   | MR Egger                  | 9  | 1.0982 | 0.6574 | 1.8344  | 0.7311 | -0.0277 | 0.0369 | 0.4773 | 5.6299  | 0.5836 | 33.3290     |
| MF0005 | LargeArteryStroke   | Weighted median           | 9  | 0.9510 | 0.6486 | 1.3944  | 0.7968 | -0.0277 | 0.0369 | 0.4773 | 5.6299  | 0.5836 | 33.3290     |
| MF0005 | LargeArteryStroke   | Inverse variance weighted | 9  | 0.9314 | 0.7041 | 1.2320  | 0.6184 | -0.0277 | 0.0369 | 0.4773 | 5.6299  | 0.5836 | 33.3290     |
| MF0005 | LargeArteryStroke   | Simple mode               | 9  | 0.9772 | 0.5555 | 1.7191  | 0.9383 | -0.0277 | 0.0369 | 0.4773 | 5.6299  | 0.5836 | 33.3290     |
| MF0005 | LargeArteryStroke   | Weighted mode             | 9  | 0.9601 | 0.6427 | 1.4343  | 0.8475 | -0.0277 | 0.0369 | 0.4773 | 5.6299  | 0.5836 | 33.3290     |
| MF0005 | SmallVesselStroke   | MR Egger                  | 10 | 0.9342 | 0.7100 | 1.2291  | 0.6397 | -0.0016 | 0.0203 | 0.9396 | 2.7977  | 0.9464 | 124.1829    |
| MF0005 | SmallVesselStroke   | Weighted median           | 10 | 0.9416 | 0.7761 | 1.1424  | 0.5418 | -0.0016 | 0.0203 | 0.9396 | 2.7977  | 0.9464 | 124.1829    |
| MF0005 | SmallVesselStroke   | Inverse variance weighted | 10 | 0.9256 | 0.7972 | 1.0747  | 0.3102 | -0.0016 | 0.0203 | 0.9396 | 2.7977  | 0.9464 | 124.1829    |
| MF0005 | SmallVesselStroke   | Simple mode               | 10 | 0.9448 | 0.7286 | 1.2252  | 0.6785 | -0.0016 | 0.0203 | 0.9396 | 2.7977  | 0.9464 | 124.1829    |
| MF0005 | SmallVesselStroke   | Weighted mode             | 10 | 0.9381 | 0.7662 | 1.1486  | 0.5517 | -0.0016 | 0.0203 | 0.9396 | 2.7977  | 0.9464 | 124.1829    |
| MF0005 | Stroke              | MR Egger                  | 13 | 0.9004 | 0.7836 | 1.0346  | 0.1670 | 0.0117  | 0.0093 | 0.2348 | 11.4385 | 0.4918 | 216.3344    |
| MF0005 | Stroke              | Weighted median           | 13 | 0.9744 | 0.8773 | 1.0824  | 0.6290 | 0.0117  | 0.0093 | 0.2348 | 11.4385 | 0.4918 | 216.3344    |
| MF0005 | Stroke              | Inverse variance weighted | 13 | 0.9711 | 0.9022 | 1.0453  | 0.4349 | 0.0117  | 0.0093 | 0.2348 | 11.4385 | 0.4918 | 216.3344    |
| MF0005 | Stroke              | Simple mode               | 13 | 1.0869 | 0.9146 | 1.2917  | 0.3628 | 0.0117  | 0.0093 | 0.2348 | 11.4385 | 0.4918 | 216.3344    |
| MF0005 | Stroke              | Weighted mode             | 13 | 0.9687 | 0.8568 | 1.0953  | 0.6213 | 0.0117  | 0.0093 | 0.2348 | 11.4385 | 0.4918 | 216.3344    |
| MF0006 | CardioEmbolicStroke | MR Egger                  | 11 | 0.1498 | 0.0014 | 16.3439 | 0.4482 | 0.0641  | 0.0986 | 0.5317 | 8.7559  | 0.4601 | 1.6363      |
| MF0006 | CardioEmbolicStroke | Weighted median           | 11 | 0.8518 | 0.2933 | 2.4738  | 0.7681 | 0.0641  | 0.0986 | 0.5317 | 8.7559  | 0.4601 | 1.6363      |
| MF0006 | CardioEmbolicStroke | Inverse variance weighted | 11 | 0.6952 | 0.3166 | 1.5267  | 0.3650 | 0.0641  | 0.0986 | 0.5317 | 8.7559  | 0.4601 | 1.6363      |
| MF0006 | CardioEmbolicStroke | Simple mode               | 11 | 1.1773 | 0.1962 | 7.0642  | 0.8618 | 0.0641  | 0.0986 | 0.5317 | 8.7559  | 0.4601 | 1.6363      |
| MF0006 | CardioEmbolicStroke | Weighted mode             | 11 | 0.9930 | 0.1910 | 5.1618  | 0.9935 | 0.0641  | 0.0986 | 0.5317 | 8.7559  | 0.4601 | 1.6363      |
| MF0006 | IschemicStroke      | MR Egger                  | 21 | 1.1772 | 0.7580 | 1.8282  | 0.4764 | 0.0007  | 0.0115 | 0.9530 | 36.6243 | 0.0088 | 10.4151     |
| MF0006 | IschemicStroke      | Weighted median           | 21 | 1.1365 | 0.9178 | 1.4072  | 0.2407 | 0.0007  | 0.0115 | 0.9530 | 36.6243 | 0.0088 | 10.4151     |
| MF0006 | IschemicStroke      | Inverse variance weighted | 21 | 1.1916 | 0.9915 | 1.4320  | 0.0616 | 0.0007  | 0.0115 | 0.9530 | 36.6243 | 0.0088 | 10.4151     |
| MF0006 | IschemicStroke      | Simple mode               | 21 | 1.1456 | 0.7886 | 1.6642  | 0.4838 | 0.0007  | 0.0115 | 0.9530 | 36.6243 | 0.0088 | 10.4151     |
| MF0006 | IschemicStroke      | Weighted mode             | 21 | 1.1250 | 0.8396 | 1.5075  | 0.4394 | 0.0007  | 0.0115 | 0.9530 | 36.6243 | 0.0088 | 10.4151     |
| MF0006 | LargeArteryStroke   | MR Egger                  | 14 | 0.4986 | 0.1020 | 2.4385  | 0.4070 | 0.0227  | 0.0384 | 0.5653 | 16.8889 | 0.1538 | 1.4093      |
| MF0006 | LargeArteryStroke   | Weighted median           | 14 | 0.6629 | 0.3248 | 1.3531  | 0.2588 | 0.0227  | 0.0384 | 0.5653 | 16.8889 | 0.1538 | 1.4093      |
| MF0006 | LargeArteryStroke   | Inverse variance weighted | 14 | 0.7778 | 0.4380 | 1.3812  | 0.3910 | 0.0227  | 0.0384 | 0.5653 | 16.8889 | 0.1538 | 1.4093      |
| MF0006 | LargeArteryStroke   | Simple mode               | 14 | 0.5808 | 0.1746 | 1.9314  | 0.3915 | 0.0227  | 0.0384 | 0.5653 | 16.8889 | 0.1538 | 1.4093      |
| MF0006 | LargeArteryStroke   | Weighted mode             | 14 | 0.8415 | 0.2906 | 2.4372  | 0.7555 | 0.0227  | 0.0384 | 0.5653 | 16.8889 | 0.1538 | 1.4093      |
| MF0006 | SmallVesselStroke   | MR Egger                  | 15 | 0.7844 | 0.3884 | 1.5842  | 0.5102 | 0.0191  | 0.0173 | 0.2884 | 14.2477 | 0.4314 | 7.1069      |
| MF0006 | SmallVesselStroke   | Weighted median           | 15 | 1.1789 | 0.8022 | 1.7323  | 0.4021 | 0.0191  | 0.0173 | 0.2884 | 14.2477 | 0.4314 | 7.1069      |
| MF0006 | SmallVesselStroke   | Inverse variance weighted | 15 | 1.1312 | 0.8602 | 1.4876  | 0.3775 | 0.0191  | 0.0173 | 0.2884 | 14.2477 | 0.4314 | 7.1069      |
| MF0006 | SmallVesselStroke   | Simple mode               | 15 | 1.2504 | 0.6071 | 2.5753  | 0.5542 | 0.0191  | 0.0173 | 0.2884 | 14.2477 | 0.4314 | 7.1069      |
| MF0006 | SmallVesselStroke   | Weighted mode             | 15 | 1.2809 | 0.6358 | 2.5806  | 0.4998 | 0.0191  | 0.0173 | 0.2884 | 14.2477 | 0.4314 | 7.1069      |
| MF0006 | Stroke              | MR Egger                  | 20 | 1.0867 | 0.6871 | 1.7186  | 0.7264 | 0.0002  | 0.0114 | 0.9869 | 36.5604 | 0.0060 | 11.4324     |
| MF0006 | Stroke              | Weighted median           | 20 | 1.0897 | 0.9100 | 1.3050  | 0.3502 | 0.0002  | 0.0114 | 0.9869 | 36.5604 | 0.0060 | 11.4324     |
| MF0006 | Stroke              | Inverse variance weighted | 20 | 1.0906 | 0.9220 | 1.2900  | 0.3115 | 0.0002  | 0.0114 | 0.9869 | 36.5604 | 0.0060 | 11.4324     |
| MF0006 | Stroke              | Simple mode               | 20 | 0.8675 | 0.5750 | 1.3089  | 0.5063 | 0.0002  | 0.0114 | 0.9869 | 36.5604 | 0.0060 | 11.4324     |
| MF0006 | Stroke              | Weighted mode             | 20 | 0.9108 | 0.6485 | 1.2790  | 0.5958 | 0.0002  | 0.0114 | 0.9869 | 36.5604 | 0.0060 | 11.4324     |
| MF0007 | CardioEmbolicStroke | MR Egger                  | 8  | 1.0133 | 0.4527 | 2.2678  | 0.9755 | -0.0015 | 0.0762 | 0.9848 | 4.1030  | 0.6627 | 49.6987     |
| MF0007 | CardioEmbolicStroke | Weighted median           | 8  | 1.1232 | 0.8211 | 1.5365  | 0.4673 | -0.0015 | 0.0762 | 0.9848 | 4.1030  | 0.6627 | 49.6987     |
| MF0007 | CardioEmbolicStroke | Inverse variance weighted | 8  | 1.0054 | 0.7881 | 1.2826  | 0.9655 | -0.0015 | 0.0762 | 0.9848 | 4.1030  | 0.6627 | 49.6987     |
| MF0007 | CardioEmbolicStroke | Simple mode               | 8  | 1.1835 | 0.7318 | 1.9141  | 0.5142 | -0.0015 | 0.0762 | 0.9848 | 4.1030  | 0.6627 | 49.6987     |
| MF0007 | CardioEmbolicStroke | Weighted mode             | 8  | 1.1293 | 0.7599 | 1.6783  | 0.5664 | -0.0015 | 0.0762 | 0.9848 | 4.1030  | 0.6627 | 49.6987     |
| MF0007 | IschemicStroke      | MR Egger                  | 12 | 1.0758 | 0.9279 | 1.2472  | 0.3559 | -0.0161 | 0.0162 | 0.3465 | 21.0900 | 0.0325 | -25975.5197 |

|        |                     |                           |    |        |        |          |        |         |        |        |         |        |             |
|--------|---------------------|---------------------------|----|--------|--------|----------|--------|---------|--------|--------|---------|--------|-------------|
| MF0007 | IschemicStroke      | Weighted median           | 12 | 1.0349 | 0.9605 | 1.1152   | 0.3675 | -0.0161 | 0.0162 | 0.3465 | 21.0900 | 0.0325 | -25975.5197 |
| MF0007 | IschemicStroke      | Inverse variance weighted | 12 | 1.0059 | 0.9435 | 1.0724   | 0.8580 | -0.0161 | 0.0162 | 0.3465 | 21.0900 | 0.0325 | -25975.5197 |
| MF0007 | IschemicStroke      | Simple mode               | 12 | 1.0436 | 0.8974 | 1.2136   | 0.5903 | -0.0161 | 0.0162 | 0.3465 | 21.0900 | 0.0325 | -25975.5197 |
| MF0007 | IschemicStroke      | Weighted mode             | 12 | 1.0469 | 0.9183 | 1.1936   | 0.5069 | -0.0161 | 0.0162 | 0.3465 | 21.0900 | 0.0325 | -25975.5197 |
| MF0007 | LargeArteryStroke   | MR Egger                  | 11 | 1.2798 | 0.8810 | 1.8590   | 0.2275 | -0.0596 | 0.0399 | 0.1695 | 7.5792  | 0.6699 | 1198.6092   |
| MF0007 | LargeArteryStroke   | Weighted median           | 11 | 0.9606 | 0.7760 | 1.1893   | 0.7124 | -0.0596 | 0.0399 | 0.1695 | 7.5792  | 0.6699 | 1198.6092   |
| MF0007 | LargeArteryStroke   | Inverse variance weighted | 11 | 0.9880 | 0.8459 | 1.1539   | 0.8790 | -0.0596 | 0.0399 | 0.1695 | 7.5792  | 0.6699 | 1198.6092   |
| MF0007 | LargeArteryStroke   | Simple mode               | 11 | 0.9493 | 0.6807 | 1.3239   | 0.7655 | -0.0596 | 0.0399 | 0.1695 | 7.5792  | 0.6699 | 1198.6092   |
| MF0007 | LargeArteryStroke   | Weighted mode             | 11 | 0.9239 | 0.6624 | 1.2887   | 0.6510 | -0.0596 | 0.0399 | 0.1695 | 7.5792  | 0.6699 | 1198.6092   |
| MF0007 | SmallVesselStroke   | MR Egger                  | 11 | 1.1393 | 0.9203 | 1.4103   | 0.2617 | -0.0331 | 0.0229 | 0.1828 | 12.1303 | 0.2764 | 3658.6631   |
| MF0007 | SmallVesselStroke   | Weighted median           | 11 | 1.0187 | 0.8952 | 1.1592   | 0.7790 | -0.0331 | 0.0229 | 0.1828 | 12.1303 | 0.2764 | 3658.6631   |
| MF0007 | SmallVesselStroke   | Inverse variance weighted | 11 | 0.9878 | 0.8989 | 1.0856   | 0.7993 | -0.0331 | 0.0229 | 0.1828 | 12.1303 | 0.2764 | 3658.6631   |
| MF0007 | SmallVesselStroke   | Simple mode               | 11 | 1.0752 | 0.8440 | 1.3697   | 0.5702 | -0.0331 | 0.0229 | 0.1828 | 12.1303 | 0.2764 | 3658.6631   |
| MF0007 | SmallVesselStroke   | Weighted mode             | 11 | 1.1189 | 0.8912 | 1.4047   | 0.3559 | -0.0331 | 0.0229 | 0.1828 | 12.1303 | 0.2764 | 3658.6631   |
| MF0007 | Stroke              | MR Egger                  | 15 | 1.0671 | 0.9379 | 1.2142   | 0.3420 | -0.0126 | 0.0138 | 0.3757 | 27.9489 | 0.0145 | -1046.8278  |
| MF0007 | Stroke              | Weighted median           | 15 | 1.0265 | 0.9672 | 1.0894   | 0.3892 | -0.0126 | 0.0138 | 0.3757 | 27.9489 | 0.0145 | -1046.8278  |
| MF0007 | Stroke              | Inverse variance weighted | 15 | 1.0105 | 0.9560 | 1.0682   | 0.7114 | -0.0126 | 0.0138 | 0.3757 | 27.9489 | 0.0145 | -1046.8278  |
| MF0007 | Stroke              | Simple mode               | 15 | 1.0284 | 0.9282 | 1.1394   | 0.6004 | -0.0126 | 0.0138 | 0.3757 | 27.9489 | 0.0145 | -1046.8278  |
| MF0007 | Stroke              | Weighted mode             | 15 | 1.0301 | 0.9481 | 1.1192   | 0.4950 | -0.0126 | 0.0138 | 0.3757 | 27.9489 | 0.0145 | -1046.8278  |
| MF0008 | CardioEmbolicStroke | MR Egger                  | 9  | 1.2953 | 0.0018 | 922.0745 | 0.9406 | -0.0158 | 0.0991 | 0.8778 | 8.2109  | 0.3144 | 2.7655      |
| MF0008 | CardioEmbolicStroke | Weighted median           | 9  | 1.0297 | 0.1350 | 7.8534   | 0.9775 | -0.0158 | 0.0991 | 0.8778 | 8.2109  | 0.3144 | 2.7655      |
| MF0008 | CardioEmbolicStroke | Inverse variance weighted | 9  | 0.7708 | 0.1789 | 3.3206   | 0.7269 | -0.0158 | 0.0991 | 0.8778 | 8.2109  | 0.3144 | 2.7655      |
| MF0008 | CardioEmbolicStroke | Simple mode               | 9  | 1.3422 | 0.0557 | 32.3443  | 0.8607 | -0.0158 | 0.0991 | 0.8778 | 8.2109  | 0.3144 | 2.7655      |
| MF0008 | CardioEmbolicStroke | Weighted mode             | 9  | 1.4848 | 0.0727 | 30.3385  | 0.8038 | -0.0158 | 0.0991 | 0.8778 | 8.2109  | 0.3144 | 2.7655      |
| MF0008 | IschemicStroke      | MR Egger                  | 20 | 0.9662 | 0.6110 | 1.5279   | 0.8848 | 0.0072  | 0.0096 | 0.4656 | 7.0895  | 0.9894 | 10.0519     |
| MF0008 | IschemicStroke      | Weighted median           | 20 | 1.1579 | 0.8699 | 1.5414   | 0.3150 | 0.0072  | 0.0096 | 0.4656 | 7.0895  | 0.9894 | 10.0519     |
| MF0008 | IschemicStroke      | Inverse variance weighted | 20 | 1.1263 | 0.9057 | 1.4007   | 0.2848 | 0.0072  | 0.0096 | 0.4656 | 7.0895  | 0.9894 | 10.0519     |
| MF0008 | IschemicStroke      | Simple mode               | 20 | 1.2437 | 0.7834 | 1.9744   | 0.3668 | 0.0072  | 0.0096 | 0.4656 | 7.0895  | 0.9894 | 10.0519     |
| MF0008 | IschemicStroke      | Weighted mode             | 20 | 1.2215 | 0.7882 | 1.8928   | 0.3819 | 0.0072  | 0.0096 | 0.4656 | 7.0895  | 0.9894 | 10.0519     |
| MF0008 | LargeArteryStroke   | MR Egger                  | 13 | 5.9213 | 0.5929 | 59.1388  | 0.1580 | -0.0465 | 0.0433 | 0.3050 | 18.9648 | 0.0894 | 18.3294     |
| MF0008 | LargeArteryStroke   | Weighted median           | 13 | 2.0152 | 0.6154 | 6.5992   | 0.2469 | -0.0465 | 0.0433 | 0.3050 | 18.9648 | 0.0894 | 18.3294     |
| MF0008 | LargeArteryStroke   | Inverse variance weighted | 13 | 1.9188 | 0.6734 | 5.4680   | 0.2225 | -0.0465 | 0.0433 | 0.3050 | 18.9648 | 0.0894 | 18.3294     |
| MF0008 | LargeArteryStroke   | Simple mode               | 13 | 4.2679 | 0.4728 | 38.5231  | 0.2204 | -0.0465 | 0.0433 | 0.3050 | 18.9648 | 0.0894 | 18.3294     |
| MF0008 | LargeArteryStroke   | Weighted mode             | 13 | 3.9287 | 0.5150 | 29.9674  | 0.2115 | -0.0465 | 0.0433 | 0.3050 | 18.9648 | 0.0894 | 18.3294     |
| MF0008 | SmallVesselStroke   | MR Egger                  | 14 | 0.8877 | 0.3497 | 2.2532   | 0.8062 | 0.0077  | 0.0183 | 0.6812 | 11.8244 | 0.4599 | 1.8285      |
| MF0008 | SmallVesselStroke   | Weighted median           | 14 | 1.1928 | 0.6475 | 2.1971   | 0.5717 | 0.0077  | 0.0183 | 0.6812 | 11.8244 | 0.4599 | 1.8285      |
| MF0008 | SmallVesselStroke   | Inverse variance weighted | 14 | 1.0593 | 0.6847 | 1.6389   | 0.7958 | 0.0077  | 0.0183 | 0.6812 | 11.8244 | 0.4599 | 1.8285      |
| MF0008 | SmallVesselStroke   | Simple mode               | 14 | 1.2090 | 0.3889 | 3.7585   | 0.7482 | 0.0077  | 0.0183 | 0.6812 | 11.8244 | 0.4599 | 1.8285      |
| MF0008 | SmallVesselStroke   | Weighted mode             | 14 | 1.3875 | 0.5359 | 3.5921   | 0.5116 | 0.0077  | 0.0183 | 0.6812 | 11.8244 | 0.4599 | 1.8285      |
| MF0008 | Stroke              | MR Egger                  | 21 | 1.1469 | 0.7614 | 1.7277   | 0.5198 | -0.0027 | 0.0084 | 0.7517 | 9.0117  | 0.9733 | 10.2107     |
| MF0008 | Stroke              | Weighted median           | 21 | 1.0217 | 0.7987 | 1.3069   | 0.8644 | -0.0027 | 0.0084 | 0.7517 | 9.0117  | 0.9733 | 10.2107     |
| MF0008 | Stroke              | Inverse variance weighted | 21 | 1.0806 | 0.8943 | 1.3058   | 0.4219 | -0.0027 | 0.0084 | 0.7517 | 9.0117  | 0.9733 | 10.2107     |
| MF0008 | Stroke              | Simple mode               | 21 | 1.0111 | 0.6765 | 1.5110   | 0.9577 | -0.0027 | 0.0084 | 0.7517 | 9.0117  | 0.9733 | 10.2107     |
| MF0008 | Stroke              | Weighted mode             | 21 | 1.0052 | 0.7032 | 1.4368   | 0.9776 | -0.0027 | 0.0084 | 0.7517 | 9.0117  | 0.9733 | 10.2107     |
| MF0009 | CardioEmbolicStroke | MR Egger                  | 5  | 0.0022 | 0.0000 | 1.3167   | 0.1574 | 0.2984  | 0.1608 | 0.1604 | 3.6497  | 0.4555 | 1.2046      |
| MF0009 | CardioEmbolicStroke | Weighted median           | 5  | 0.8933 | 0.2240 | 3.5625   | 0.8729 | 0.2984  | 0.1608 | 0.1604 | 3.6497  | 0.4555 | 1.2046      |
| MF0009 | CardioEmbolicStroke | Inverse variance weighted | 5  | 0.8592 | 0.2887 | 2.5567   | 0.7850 | 0.2984  | 0.1608 | 0.1604 | 3.6497  | 0.4555 | 1.2046      |
| MF0009 | CardioEmbolicStroke | Simple mode               | 5  | 1.1073 | 0.1393 | 8.7988   | 0.9279 | 0.2984  | 0.1608 | 0.1604 | 3.6497  | 0.4555 | 1.2046      |
| MF0009 | CardioEmbolicStroke | Weighted mode             | 5  | 0.9757 | 0.1251 | 7.6119   | 0.9824 | 0.2984  | 0.1608 | 0.1604 | 3.6497  | 0.4555 | 1.2046      |
| MF0009 | IschemicStroke      | MR Egger                  | 16 | 1.2028 | 1.0142 | 1.4265   | 0.0522 | -0.0124 | 0.0082 | 0.1499 | 14.8779 | 0.4602 | 140.4630    |
| MF0009 | IschemicStroke      | Weighted median           | 16 | 1.1449 | 0.9879 | 1.3269   | 0.0722 | -0.0124 | 0.0082 | 0.1499 | 14.8779 | 0.4602 | 140.4630    |
| MF0009 | IschemicStroke      | Inverse variance weighted | 16 | 1.0860 | 0.9741 | 1.2109   | 0.1371 | -0.0124 | 0.0082 | 0.1499 | 14.8779 | 0.4602 | 140.4630    |
| MF0009 | IschemicStroke      | Simple mode               | 16 | 1.0708 | 0.8526 | 1.3449   | 0.5649 | -0.0124 | 0.0082 | 0.1499 | 14.8779 | 0.4602 | 140.4630    |

|        |                     |                           |    |        |        |           |        |         |        |        |         |        |           |
|--------|---------------------|---------------------------|----|--------|--------|-----------|--------|---------|--------|--------|---------|--------|-----------|
| MF0009 | IschemicStroke      | Weighted mode             | 16 | 1.1350 | 0.9468 | 1.3608    | 0.1912 | -0.0124 | 0.0082 | 0.1499 | 14.8779 | 0.4602 | 140.4630  |
| MF0009 | LargeArteryStroke   | MR Egger                  | 11 | 0.6109 | 0.2566 | 1.4543    | 0.2943 | 0.0398  | 0.0341 | 0.2736 | 7.9528  | 0.6334 | 5.0420    |
| MF0009 | LargeArteryStroke   | Weighted median           | 11 | 0.6462 | 0.3366 | 1.2405    | 0.1894 | 0.0398  | 0.0341 | 0.2736 | 7.9528  | 0.6334 | 5.0420    |
| MF0009 | LargeArteryStroke   | Inverse variance weighted | 11 | 0.9377 | 0.5784 | 1.5201    | 0.7940 | 0.0398  | 0.0341 | 0.2736 | 7.9528  | 0.6334 | 5.0420    |
| MF0009 | LargeArteryStroke   | Simple mode               | 11 | 0.6435 | 0.2205 | 1.8779    | 0.4386 | 0.0398  | 0.0341 | 0.2736 | 7.9528  | 0.6334 | 5.0420    |
| MF0009 | LargeArteryStroke   | Weighted mode             | 11 | 0.6263 | 0.2708 | 1.4484    | 0.2996 | 0.0398  | 0.0341 | 0.2736 | 7.9528  | 0.6334 | 5.0420    |
| MF0009 | SmallVesselStroke   | MR Egger                  | 12 | 1.3893 | 0.8876 | 2.1746    | 0.1808 | -0.0426 | 0.0183 | 0.0425 | 11.1060 | 0.4344 | 17.8570   |
| MF0009 | SmallVesselStroke   | Weighted median           | 12 | 1.1009 | 0.7803 | 1.5533    | 0.5840 | -0.0426 | 0.0183 | 0.0425 | 11.1060 | 0.4344 | 17.8570   |
| MF0009 | SmallVesselStroke   | Inverse variance weighted | 12 | 0.8977 | 0.6949 | 1.1599    | 0.4092 | -0.0426 | 0.0183 | 0.0425 | 11.1060 | 0.4344 | 17.8570   |
| MF0009 | SmallVesselStroke   | Simple mode               | 12 | 1.1688 | 0.6799 | 2.0091    | 0.5839 | -0.0426 | 0.0183 | 0.0425 | 11.1060 | 0.4344 | 17.8570   |
| MF0009 | SmallVesselStroke   | Weighted mode             | 12 | 1.1377 | 0.7415 | 1.7457    | 0.5667 | -0.0426 | 0.0183 | 0.0425 | 11.1060 | 0.4344 | 17.8570   |
| MF0009 | Stroke              | MR Egger                  | 13 | 1.1628 | 0.8884 | 1.5219    | 0.2954 | -0.0132 | 0.0093 | 0.1820 | 13.2745 | 0.3494 | 47.0458   |
| MF0009 | Stroke              | Weighted median           | 13 | 1.0354 | 0.8616 | 1.2443    | 0.7103 | -0.0132 | 0.0093 | 0.1820 | 13.2745 | 0.3494 | 47.0458   |
| MF0009 | Stroke              | Inverse variance weighted | 13 | 0.9813 | 0.8535 | 1.1282    | 0.7910 | -0.0132 | 0.0093 | 0.1820 | 13.2745 | 0.3494 | 47.0458   |
| MF0009 | Stroke              | Simple mode               | 13 | 1.0740 | 0.7893 | 1.4614    | 0.6577 | -0.0132 | 0.0093 | 0.1820 | 13.2745 | 0.3494 | 47.0458   |
| MF0009 | Stroke              | Weighted mode             | 13 | 1.0706 | 0.7989 | 1.4347    | 0.6560 | -0.0132 | 0.0093 | 0.1820 | 13.2745 | 0.3494 | 47.0458   |
| MF0010 | CardioEmbolicStroke | MR Egger                  | 6  | 8.3299 | 0.0396 | 1751.0350 | 0.4806 | -0.0257 | 0.0785 | 0.7601 | 2.4108  | 0.6607 | 3.8433    |
| MF0010 | CardioEmbolicStroke | Weighted median           | 6  | 2.2604 | 0.2550 | 20.0343   | 0.4638 | -0.0257 | 0.0785 | 0.7601 | 2.4108  | 0.6607 | 3.8433    |
| MF0010 | CardioEmbolicStroke | Inverse variance weighted | 6  | 3.5835 | 0.6280 | 20.4469   | 0.1509 | -0.0257 | 0.0785 | 0.7601 | 2.4108  | 0.6607 | 3.8433    |
| MF0010 | CardioEmbolicStroke | Simple mode               | 6  | 2.0317 | 0.0761 | 54.2212   | 0.6898 | -0.0257 | 0.0785 | 0.7601 | 2.4108  | 0.6607 | 3.8433    |
| MF0010 | CardioEmbolicStroke | Weighted mode             | 6  | 1.9403 | 0.0563 | 66.8496   | 0.7286 | -0.0257 | 0.0785 | 0.7601 | 2.4108  | 0.6607 | 3.8433    |
| MF0010 | IschemicStroke      | MR Egger                  | 12 | 1.2255 | 0.7823 | 1.9199    | 0.3955 | -0.0022 | 0.0094 | 0.8171 | 3.7800  | 0.9567 | 9.2010    |
| MF0010 | IschemicStroke      | Weighted median           | 12 | 1.2890 | 0.9303 | 1.7861    | 0.1271 | -0.0022 | 0.0094 | 0.8171 | 3.7800  | 0.9567 | 9.2010    |
| MF0010 | IschemicStroke      | Inverse variance weighted | 12 | 1.1726 | 0.9017 | 1.5250    | 0.2348 | -0.0022 | 0.0094 | 0.8171 | 3.7800  | 0.9567 | 9.2010    |
| MF0010 | IschemicStroke      | Simple mode               | 12 | 1.3845 | 0.8445 | 2.2698    | 0.2235 | -0.0022 | 0.0094 | 0.8171 | 3.7800  | 0.9567 | 9.2010    |
| MF0010 | IschemicStroke      | Weighted mode             | 12 | 1.3150 | 0.8684 | 1.9915    | 0.2224 | -0.0022 | 0.0094 | 0.8171 | 3.7800  | 0.9567 | 9.2010    |
| MF0010 | LargeArteryStroke   | MR Egger                  | 8  | 0.7952 | 0.0246 | 25.7398   | 0.9014 | 0.0284  | 0.0536 | 0.6152 | 5.9378  | 0.4302 | 24.0103   |
| MF0010 | LargeArteryStroke   | Weighted median           | 8  | 1.5648 | 0.3365 | 7.2756    | 0.5680 | 0.0284  | 0.0536 | 0.6152 | 5.9378  | 0.4302 | 24.0103   |
| MF0010 | LargeArteryStroke   | Inverse variance weighted | 8  | 1.9213 | 0.5773 | 6.3939    | 0.2871 | 0.0284  | 0.0536 | 0.6152 | 5.9378  | 0.4302 | 24.0103   |
| MF0010 | LargeArteryStroke   | Simple mode               | 8  | 1.6669 | 0.1959 | 14.1846   | 0.6542 | 0.0284  | 0.0536 | 0.6152 | 5.9378  | 0.4302 | 24.0103   |
| MF0010 | LargeArteryStroke   | Weighted mode             | 8  | 1.5452 | 0.2254 | 10.5927   | 0.6711 | 0.0284  | 0.0536 | 0.6152 | 5.9378  | 0.4302 | 24.0103   |
| MF0010 | SmallVesselStroke   | MR Egger                  | 9  | 1.4053 | 0.4641 | 4.2551    | 0.5662 | -0.0106 | 0.0201 | 0.6163 | 2.9919  | 0.8858 | 3.8930    |
| MF0010 | SmallVesselStroke   | Weighted median           | 9  | 0.8815 | 0.4251 | 1.8278    | 0.7347 | -0.0106 | 0.0201 | 0.6163 | 2.9919  | 0.8858 | 3.8930    |
| MF0010 | SmallVesselStroke   | Inverse variance weighted | 9  | 1.0876 | 0.6237 | 1.8964    | 0.7672 | -0.0106 | 0.0201 | 0.6163 | 2.9919  | 0.8858 | 3.8930    |
| MF0010 | SmallVesselStroke   | Simple mode               | 9  | 0.7246 | 0.2394 | 2.1931    | 0.5843 | -0.0106 | 0.0201 | 0.6163 | 2.9919  | 0.8858 | 3.8930    |
| MF0010 | SmallVesselStroke   | Weighted mode             | 9  | 0.7344 | 0.2811 | 1.9189    | 0.5463 | -0.0106 | 0.0201 | 0.6163 | 2.9919  | 0.8858 | 3.8930    |
| MF0010 | Stroke              | MR Egger                  | 11 | 1.1286 | 0.5153 | 2.4720    | 0.7692 | 0.0040  | 0.0126 | 0.7595 | 10.0539 | 0.3461 | 5.2486    |
| MF0010 | Stroke              | Weighted median           | 11 | 1.6101 | 1.0826 | 2.3945    | 0.0187 | 0.0040  | 0.0126 | 0.7595 | 10.0539 | 0.3461 | 5.2486    |
| MF0010 | Stroke              | Inverse variance weighted | 11 | 1.2678 | 0.9479 | 1.6957    | 0.1097 | 0.0040  | 0.0126 | 0.7595 | 10.0539 | 0.3461 | 5.2486    |
| MF0010 | Stroke              | Simple mode               | 11 | 1.7378 | 0.9061 | 3.3327    | 0.1272 | 0.0040  | 0.0126 | 0.7595 | 10.0539 | 0.3461 | 5.2486    |
| MF0010 | Stroke              | Weighted mode             | 11 | 1.7194 | 0.9157 | 3.2287    | 0.1227 | 0.0040  | 0.0126 | 0.7595 | 10.0539 | 0.3461 | 5.2486    |
| MF0011 | CardioEmbolicStroke | MR Egger                  | 11 | 1.7241 | 0.3384 | 8.7849    | 0.5284 | -0.0130 | 0.0859 | 0.8828 | 4.3138  | 0.8896 | 5.8906    |
| MF0011 | CardioEmbolicStroke | Weighted median           | 11 | 1.6106 | 1.0316 | 2.5144    | 0.0360 | -0.0130 | 0.0859 | 0.8828 | 4.3138  | 0.8896 | 5.8906    |
| MF0011 | CardioEmbolicStroke | Inverse variance weighted | 11 | 1.5244 | 1.0767 | 2.1583    | 0.0175 | -0.0130 | 0.0859 | 0.8828 | 4.3138  | 0.8896 | 5.8906    |
| MF0011 | CardioEmbolicStroke | Simple mode               | 11 | 1.4711 | 0.7225 | 2.9954    | 0.3124 | -0.0130 | 0.0859 | 0.8828 | 4.3138  | 0.8896 | 5.8906    |
| MF0011 | CardioEmbolicStroke | Weighted mode             | 11 | 1.4855 | 0.7421 | 2.9738    | 0.2899 | -0.0130 | 0.0859 | 0.8828 | 4.3138  | 0.8896 | 5.8906    |
| MF0011 | IschemicStroke      | MR Egger                  | 16 | 1.0708 | 0.9164 | 1.2512    | 0.4040 | -0.0030 | 0.0099 | 0.7634 | 16.4502 | 0.2867 | 3833.8596 |
| MF0011 | IschemicStroke      | Weighted median           | 16 | 1.0283 | 0.9358 | 1.1300    | 0.5610 | -0.0030 | 0.0099 | 0.7634 | 16.4502 | 0.2867 | 3833.8596 |
| MF0011 | IschemicStroke      | Inverse variance weighted | 16 | 1.0477 | 0.9787 | 1.1216    | 0.1798 | -0.0030 | 0.0099 | 0.7634 | 16.4502 | 0.2867 | 3833.8596 |
| MF0011 | IschemicStroke      | Simple mode               | 16 | 1.0179 | 0.8729 | 1.1870    | 0.8239 | -0.0030 | 0.0099 | 0.7634 | 16.4502 | 0.2867 | 3833.8596 |
| MF0011 | IschemicStroke      | Weighted mode             | 16 | 1.0234 | 0.8948 | 1.1705    | 0.7405 | -0.0030 | 0.0099 | 0.7634 | 16.4502 | 0.2867 | 3833.8596 |
| MF0011 | LargeArteryStroke   | MR Egger                  | 14 | 1.5304 | 0.7861 | 2.9795    | 0.2345 | -0.0495 | 0.0397 | 0.2355 | 17.0420 | 0.1974 | 24.8707   |
| MF0011 | LargeArteryStroke   | Weighted median           | 14 | 1.0287 | 0.7432 | 1.4237    | 0.8646 | -0.0495 | 0.0397 | 0.2355 | 17.0420 | 0.1974 | 24.8707   |

|        |                     |                           |    |        |        |         |        |         |        |        |         |        |           |
|--------|---------------------|---------------------------|----|--------|--------|---------|--------|---------|--------|--------|---------|--------|-----------|
| MF0011 | LargeArteryStroke   | Inverse variance weighted | 14 | 1.0337 | 0.7974 | 1.3399  | 0.8026 | -0.0495 | 0.0397 | 0.2355 | 17.0420 | 0.1974 | 24.8707   |
| MF0011 | LargeArteryStroke   | Simple mode               | 14 | 0.9959 | 0.5850 | 1.6955  | 0.9882 | -0.0495 | 0.0397 | 0.2355 | 17.0420 | 0.1974 | 24.8707   |
| MF0011 | LargeArteryStroke   | Weighted mode             | 14 | 1.0087 | 0.6111 | 1.6650  | 0.9734 | -0.0495 | 0.0397 | 0.2355 | 17.0420 | 0.1974 | 24.8707   |
| MF0011 | SmallVesselStroke   | MR Egger                  | 14 | 1.3342 | 0.9590 | 1.8561  | 0.1127 | -0.0231 | 0.0197 | 0.2621 | 11.2014 | 0.5939 | 87.5932   |
| MF0011 | SmallVesselStroke   | Weighted median           | 14 | 1.1438 | 0.9621 | 1.3599  | 0.1280 | -0.0231 | 0.0197 | 0.2621 | 11.2014 | 0.5939 | 87.5932   |
| MF0011 | SmallVesselStroke   | Inverse variance weighted | 14 | 1.1107 | 0.9795 | 1.2594  | 0.1016 | -0.0231 | 0.0197 | 0.2621 | 11.2014 | 0.5939 | 87.5932   |
| MF0011 | SmallVesselStroke   | Simple mode               | 14 | 1.1472 | 0.8435 | 1.5603  | 0.3973 | -0.0231 | 0.0197 | 0.2621 | 11.2014 | 0.5939 | 87.5932   |
| MF0011 | SmallVesselStroke   | Weighted mode             | 14 | 1.2219 | 0.9275 | 1.6098  | 0.1778 | -0.0231 | 0.0197 | 0.2621 | 11.2014 | 0.5939 | 87.5932   |
| MF0011 | Stroke              | MR Egger                  | 15 | 1.1508 | 0.8721 | 1.5185  | 0.3389 | -0.0128 | 0.0156 | 0.4262 | 23.0759 | 0.0408 | 126.4383  |
| MF0011 | Stroke              | Weighted median           | 15 | 1.0308 | 0.9338 | 1.1380  | 0.5472 | -0.0128 | 0.0156 | 0.4262 | 23.0759 | 0.0408 | 126.4383  |
| MF0011 | Stroke              | Inverse variance weighted | 15 | 1.0301 | 0.9485 | 1.1186  | 0.4811 | -0.0128 | 0.0156 | 0.4262 | 23.0759 | 0.0408 | 126.4383  |
| MF0011 | Stroke              | Simple mode               | 15 | 1.1890 | 0.9640 | 1.4664  | 0.1281 | -0.0128 | 0.0156 | 0.4262 | 23.0759 | 0.0408 | 126.4383  |
| MF0011 | Stroke              | Weighted mode             | 15 | 0.9459 | 0.7795 | 1.1477  | 0.5817 | -0.0128 | 0.0156 | 0.4262 | 23.0759 | 0.0408 | 126.4383  |
| MF0012 | CardioEmbolicStroke | MR Egger                  | 15 | 0.8377 | 0.3926 | 1.7873  | 0.6544 | 0.0300  | 0.0644 | 0.6488 | 9.6510  | 0.7222 | 82.4824   |
| MF0012 | CardioEmbolicStroke | Weighted median           | 15 | 1.0075 | 0.7763 | 1.3076  | 0.9549 | 0.0300  | 0.0644 | 0.6488 | 9.6510  | 0.7222 | 82.4824   |
| MF0012 | CardioEmbolicStroke | Inverse variance weighted | 15 | 0.9974 | 0.8265 | 1.2038  | 0.9788 | 0.0300  | 0.0644 | 0.6488 | 9.6510  | 0.7222 | 82.4824   |
| MF0012 | CardioEmbolicStroke | Simple mode               | 15 | 1.1041 | 0.7052 | 1.7286  | 0.6717 | 0.0300  | 0.0644 | 0.6488 | 9.6510  | 0.7222 | 82.4824   |
| MF0012 | CardioEmbolicStroke | Weighted mode             | 15 | 1.0858 | 0.6767 | 1.7422  | 0.7380 | 0.0300  | 0.0644 | 0.6488 | 9.6510  | 0.7222 | 82.4824   |
| MF0012 | IschemicStroke      | MR Egger                  | 23 | 0.9975 | 0.9314 | 1.0684  | 0.9446 | -0.0088 | 0.0075 | 0.2512 | 15.0290 | 0.8610 | -281.9838 |
| MF0012 | IschemicStroke      | Weighted median           | 23 | 0.9611 | 0.9182 | 1.0061  | 0.0893 | -0.0088 | 0.0075 | 0.2512 | 15.0290 | 0.8610 | -281.9838 |
| MF0012 | IschemicStroke      | Inverse variance weighted | 23 | 0.9619 | 0.9312 | 0.9935  | 0.0186 | -0.0088 | 0.0075 | 0.2512 | 15.0290 | 0.8610 | -281.9838 |
| MF0012 | IschemicStroke      | Simple mode               | 23 | 0.9555 | 0.8776 | 1.0404  | 0.3061 | -0.0088 | 0.0075 | 0.2512 | 15.0290 | 0.8610 | -281.9838 |
| MF0012 | IschemicStroke      | Weighted mode             | 23 | 0.9740 | 0.9079 | 1.0448  | 0.4689 | -0.0088 | 0.0075 | 0.2512 | 15.0290 | 0.8610 | -281.9838 |
| MF0012 | LargeArteryStroke   | MR Egger                  | 19 | 1.2361 | 0.8774 | 1.7416  | 0.2420 | -0.0495 | 0.0340 | 0.1631 | 27.0073 | 0.0789 | -162.0631 |
| MF0012 | LargeArteryStroke   | Weighted median           | 19 | 1.0659 | 0.8996 | 1.2630  | 0.4609 | -0.0495 | 0.0340 | 0.1631 | 27.0073 | 0.0789 | -162.0631 |
| MF0012 | LargeArteryStroke   | Inverse variance weighted | 19 | 0.9789 | 0.8488 | 1.1291  | 0.7700 | -0.0495 | 0.0340 | 0.1631 | 27.0073 | 0.0789 | -162.0631 |
| MF0012 | LargeArteryStroke   | Simple mode               | 19 | 1.0493 | 0.7800 | 1.4118  | 0.7540 | -0.0495 | 0.0340 | 0.1631 | 27.0073 | 0.0789 | -162.0631 |
| MF0012 | LargeArteryStroke   | Weighted mode             | 19 | 1.1037 | 0.8232 | 1.4798  | 0.5178 | -0.0495 | 0.0340 | 0.1631 | 27.0073 | 0.0789 | -162.0631 |
| MF0012 | SmallVesselStroke   | MR Egger                  | 21 | 0.9516 | 0.8060 | 1.1236  | 0.5656 | -0.0017 | 0.0177 | 0.9260 | 31.6711 | 0.0340 | -114.5577 |
| MF0012 | SmallVesselStroke   | Weighted median           | 21 | 0.9511 | 0.8683 | 1.0418  | 0.2807 | -0.0017 | 0.0177 | 0.9260 | 31.6711 | 0.0340 | -114.5577 |
| MF0012 | SmallVesselStroke   | Inverse variance weighted | 21 | 0.9449 | 0.8765 | 1.0187  | 0.1397 | -0.0017 | 0.0177 | 0.9260 | 31.6711 | 0.0340 | -114.5577 |
| MF0012 | SmallVesselStroke   | Simple mode               | 21 | 1.0927 | 0.8958 | 1.3329  | 0.3924 | -0.0017 | 0.0177 | 0.9260 | 31.6711 | 0.0340 | -114.5577 |
| MF0012 | SmallVesselStroke   | Weighted mode             | 21 | 0.8989 | 0.7591 | 1.0643  | 0.2304 | -0.0017 | 0.0177 | 0.9260 | 31.6711 | 0.0340 | -114.5577 |
| MF0012 | Stroke              | MR Egger                  | 26 | 0.9861 | 0.9301 | 1.0455  | 0.6427 | -0.0037 | 0.0063 | 0.5675 | 17.3366 | 0.8340 | -215.7584 |
| MF0012 | Stroke              | Weighted median           | 26 | 0.9713 | 0.9356 | 1.0085  | 0.1289 | -0.0037 | 0.0063 | 0.5675 | 17.3366 | 0.8340 | -215.7584 |
| MF0012 | Stroke              | Inverse variance weighted | 26 | 0.9711 | 0.9450 | 0.9979  | 0.0346 | -0.0037 | 0.0063 | 0.5675 | 17.3366 | 0.8340 | -215.7584 |
| MF0012 | Stroke              | Simple mode               | 26 | 0.9570 | 0.8925 | 1.0263  | 0.2295 | -0.0037 | 0.0063 | 0.5675 | 17.3366 | 0.8340 | -215.7584 |
| MF0012 | Stroke              | Weighted mode             | 26 | 0.9619 | 0.8979 | 1.0304  | 0.2791 | -0.0037 | 0.0063 | 0.5675 | 17.3366 | 0.8340 | -215.7584 |
| MF0013 | CardioEmbolicStroke | MR Egger                  | 5  | 0.0035 | 0.0000 | 1.6296  | 0.1690 | 0.0985  | 0.0913 | 0.3597 | 1.3652  | 0.8502 | 10.3635   |
| MF0013 | CardioEmbolicStroke | Weighted median           | 5  | 0.0978 | 0.0085 | 1.1209  | 0.0617 | 0.0985  | 0.0913 | 0.3597 | 1.3652  | 0.8502 | 10.3635   |
| MF0013 | CardioEmbolicStroke | Inverse variance weighted | 5  | 0.0857 | 0.0116 | 0.6322  | 0.0160 | 0.0985  | 0.0913 | 0.3597 | 1.3652  | 0.8502 | 10.3635   |
| MF0013 | CardioEmbolicStroke | Simple mode               | 5  | 0.2352 | 0.0080 | 6.9414  | 0.4491 | 0.0985  | 0.0913 | 0.3597 | 1.3652  | 0.8502 | 10.3635   |
| MF0013 | CardioEmbolicStroke | Weighted mode             | 5  | 0.0299 | 0.0010 | 0.8662  | 0.1105 | 0.0985  | 0.0913 | 0.3597 | 1.3652  | 0.8502 | 10.3635   |
| MF0013 | IschemicStroke      | MR Egger                  | 15 | 0.9964 | 0.6317 | 1.5716  | 0.9878 | -0.0024 | 0.0106 | 0.8282 | 8.7937  | 0.7883 | 7.5977    |
| MF0013 | IschemicStroke      | Weighted median           | 15 | 0.8963 | 0.6266 | 1.2821  | 0.5488 | -0.0024 | 0.0106 | 0.8282 | 8.7937  | 0.7883 | 7.5977    |
| MF0013 | IschemicStroke      | Inverse variance weighted | 15 | 0.9552 | 0.7361 | 1.2394  | 0.7300 | -0.0024 | 0.0106 | 0.8282 | 8.7937  | 0.7883 | 7.5977    |
| MF0013 | IschemicStroke      | Simple mode               | 15 | 0.8660 | 0.4742 | 1.5814  | 0.6467 | -0.0024 | 0.0106 | 0.8282 | 8.7937  | 0.7883 | 7.5977    |
| MF0013 | IschemicStroke      | Weighted mode             | 15 | 0.8769 | 0.5123 | 1.5011  | 0.6393 | -0.0024 | 0.0106 | 0.8282 | 8.7937  | 0.7883 | 7.5977    |
| MF0013 | LargeArteryStroke   | MR Egger                  | 12 | 1.4351 | 0.2184 | 9.4280  | 0.7147 | 0.0048  | 0.0389 | 0.9046 | 5.5201  | 0.8538 | 2.0581    |
| MF0013 | LargeArteryStroke   | Weighted median           | 12 | 1.8366 | 0.5271 | 6.3992  | 0.3398 | 0.0048  | 0.0389 | 0.9046 | 5.5201  | 0.8538 | 2.0581    |
| MF0013 | LargeArteryStroke   | Inverse variance weighted | 12 | 1.5879 | 0.6017 | 4.1907  | 0.3504 | 0.0048  | 0.0389 | 0.9046 | 5.5201  | 0.8538 | 2.0581    |
| MF0013 | LargeArteryStroke   | Simple mode               | 12 | 4.8271 | 0.6503 | 35.8304 | 0.1520 | 0.0048  | 0.0389 | 0.9046 | 5.5201  | 0.8538 | 2.0581    |
| MF0013 | LargeArteryStroke   | Weighted mode             | 12 | 1.2367 | 0.2234 | 6.8478  | 0.8122 | 0.0048  | 0.0389 | 0.9046 | 5.5201  | 0.8538 | 2.0581    |

|        |                     |                           |    |        |        |        |        |         |        |        |         |        |          |
|--------|---------------------|---------------------------|----|--------|--------|--------|--------|---------|--------|--------|---------|--------|----------|
| MF0013 | SmallVesselStroke   | MR Egger                  | 12 | 0.8859 | 0.2568 | 3.0555 | 0.8517 | -0.0053 | 0.0253 | 0.8397 | 13.5215 | 0.1960 | 1.7317   |
| MF0013 | SmallVesselStroke   | Weighted median           | 12 | 0.9332 | 0.4324 | 2.0141 | 0.8602 | -0.0053 | 0.0253 | 0.8397 | 13.5215 | 0.1960 | 1.7317   |
| MF0013 | SmallVesselStroke   | Inverse variance weighted | 12 | 0.7914 | 0.4322 | 1.4491 | 0.4485 | -0.0053 | 0.0253 | 0.8397 | 13.5215 | 0.1960 | 1.7317   |
| MF0013 | SmallVesselStroke   | Simple mode               | 12 | 0.9550 | 0.3006 | 3.0338 | 0.9392 | -0.0053 | 0.0253 | 0.8397 | 13.5215 | 0.1960 | 1.7317   |
| MF0013 | SmallVesselStroke   | Weighted mode             | 12 | 0.8549 | 0.3312 | 2.2068 | 0.7521 | -0.0053 | 0.0253 | 0.8397 | 13.5215 | 0.1960 | 1.7317   |
| MF0013 | Stroke              | MR Egger                  | 15 | 0.9298 | 0.5895 | 1.4666 | 0.7593 | 0.0012  | 0.0099 | 0.9046 | 6.2617  | 0.9361 | 9.7221   |
| MF0013 | Stroke              | Weighted median           | 15 | 0.9228 | 0.6673 | 1.2762 | 0.6272 | 0.0012  | 0.0099 | 0.9046 | 6.2617  | 0.9361 | 9.7221   |
| MF0013 | Stroke              | Inverse variance weighted | 15 | 0.9527 | 0.7518 | 1.2073 | 0.6883 | 0.0012  | 0.0099 | 0.9046 | 6.2617  | 0.9361 | 9.7221   |
| MF0013 | Stroke              | Simple mode               | 15 | 0.9645 | 0.5756 | 1.6164 | 0.8929 | 0.0012  | 0.0099 | 0.9046 | 6.2617  | 0.9361 | 9.7221   |
| MF0013 | Stroke              | Weighted mode             | 15 | 0.9074 | 0.5676 | 1.4507 | 0.6910 | 0.0012  | 0.0099 | 0.9046 | 6.2617  | 0.9361 | 9.7221   |
| MF0014 | CardioEmbolicStroke | MR Egger                  | 5  | 1.0020 | 0.1914 | 5.2442 | 0.9983 | 0.0521  | 0.0839 | 0.5786 | 1.8559  | 0.6029 | 2.0139   |
| MF0014 | CardioEmbolicStroke | Weighted median           | 5  | 1.4384 | 0.5928 | 3.4903 | 0.4215 | 0.0521  | 0.0839 | 0.5786 | 1.8559  | 0.6029 | 2.0139   |
| MF0014 | CardioEmbolicStroke | Inverse variance weighted | 5  | 1.5989 | 0.7551 | 3.3860 | 0.2202 | 0.0521  | 0.0839 | 0.5786 | 1.8559  | 0.6029 | 2.0139   |
| MF0014 | CardioEmbolicStroke | Simple mode               | 5  | 1.4906 | 0.4825 | 4.6055 | 0.5261 | 0.0521  | 0.0839 | 0.5786 | 1.8559  | 0.6029 | 2.0139   |
| MF0014 | CardioEmbolicStroke | Weighted mode             | 5  | 1.4088 | 0.5228 | 3.7969 | 0.5352 | 0.0521  | 0.0839 | 0.5786 | 1.8559  | 0.6029 | 2.0139   |
| MF0014 | IschemicStroke      | MR Egger                  | 18 | 1.0420 | 0.8763 | 1.2390 | 0.6477 | -0.0118 | 0.0133 | 0.3895 | 11.5257 | 0.7759 | 422.2535 |
| MF0014 | IschemicStroke      | Weighted median           | 18 | 0.9795 | 0.8698 | 1.1029 | 0.7318 | -0.0118 | 0.0133 | 0.3895 | 11.5257 | 0.7759 | 422.2535 |
| MF0014 | IschemicStroke      | Inverse variance weighted | 18 | 0.9742 | 0.8922 | 1.0637 | 0.5598 | -0.0118 | 0.0133 | 0.3895 | 11.5257 | 0.7759 | 422.2535 |
| MF0014 | IschemicStroke      | Simple mode               | 18 | 0.9344 | 0.7759 | 1.1253 | 0.4840 | -0.0118 | 0.0133 | 0.3895 | 11.5257 | 0.7759 | 422.2535 |
| MF0014 | IschemicStroke      | Weighted mode             | 18 | 0.9740 | 0.8342 | 1.1372 | 0.7431 | -0.0118 | 0.0133 | 0.3895 | 11.5257 | 0.7759 | 422.2535 |
| MF0014 | LargeArteryStroke   | MR Egger                  | 11 | 1.0994 | 0.5573 | 2.1689 | 0.7907 | -0.0658 | 0.0471 | 0.1958 | 9.6035  | 0.4759 | 8.2742   |
| MF0014 | LargeArteryStroke   | Weighted median           | 11 | 0.6781 | 0.4183 | 1.0993 | 0.1150 | -0.0658 | 0.0471 | 0.1958 | 9.6035  | 0.4759 | 8.2742   |
| MF0014 | LargeArteryStroke   | Inverse variance weighted | 11 | 0.7249 | 0.5124 | 1.0255 | 0.0691 | -0.0658 | 0.0471 | 0.1958 | 9.6035  | 0.4759 | 8.2742   |
| MF0014 | LargeArteryStroke   | Simple mode               | 11 | 0.7368 | 0.3176 | 1.7090 | 0.4930 | -0.0658 | 0.0471 | 0.1958 | 9.6035  | 0.4759 | 8.2742   |
| MF0014 | LargeArteryStroke   | Weighted mode             | 11 | 0.7422 | 0.3539 | 1.5567 | 0.4485 | -0.0658 | 0.0471 | 0.1958 | 9.6035  | 0.4759 | 8.2742   |
| MF0014 | SmallVesselStroke   | MR Egger                  | 12 | 0.7884 | 0.5488 | 1.1324 | 0.2271 | 0.0251  | 0.0258 | 0.3534 | 5.9763  | 0.8749 | 58.5920  |
| MF0014 | SmallVesselStroke   | Weighted median           | 12 | 0.8774 | 0.6837 | 1.1260 | 0.3043 | 0.0251  | 0.0258 | 0.3534 | 5.9763  | 0.8749 | 58.5920  |
| MF0014 | SmallVesselStroke   | Inverse variance weighted | 12 | 0.9201 | 0.7644 | 1.1074 | 0.3783 | 0.0251  | 0.0258 | 0.3534 | 5.9763  | 0.8749 | 58.5920  |
| MF0014 | SmallVesselStroke   | Simple mode               | 12 | 0.9133 | 0.5892 | 1.4156 | 0.6927 | 0.0251  | 0.0258 | 0.3534 | 5.9763  | 0.8749 | 58.5920  |
| MF0014 | SmallVesselStroke   | Weighted mode             | 12 | 0.8860 | 0.6319 | 1.2422 | 0.4972 | 0.0251  | 0.0258 | 0.3534 | 5.9763  | 0.8749 | 58.5920  |
| MF0014 | Stroke              | MR Egger                  | 18 | 1.1710 | 0.9654 | 1.4204 | 0.1286 | -0.0212 | 0.0125 | 0.1083 | 19.5101 | 0.3000 | 155.4744 |
| MF0014 | Stroke              | Weighted median           | 18 | 0.9996 | 0.8763 | 1.1401 | 0.9949 | -0.0212 | 0.0125 | 0.1083 | 19.5101 | 0.3000 | 155.4744 |
| MF0014 | Stroke              | Inverse variance weighted | 18 | 1.0106 | 0.9173 | 1.1133 | 0.8316 | -0.0212 | 0.0125 | 0.1083 | 19.5101 | 0.3000 | 155.4744 |
| MF0014 | Stroke              | Simple mode               | 18 | 0.9611 | 0.7761 | 1.1902 | 0.7204 | -0.0212 | 0.0125 | 0.1083 | 19.5101 | 0.3000 | 155.4744 |
| MF0014 | Stroke              | Weighted mode             | 18 | 0.9879 | 0.8279 | 1.1787 | 0.8940 | -0.0212 | 0.0125 | 0.1083 | 19.5101 | 0.3000 | 155.4744 |
| MF0015 | CardioEmbolicStroke | MR Egger                  | 6  | #####  | 0.0097 | #####  | 0.3352 | -0.5110 | 0.5046 | 0.3685 | 3.3543  | 0.6455 | 2.7596   |
| MF0015 | CardioEmbolicStroke | Weighted median           | 6  | 1.7231 | 0.9930 | 2.9903 | 0.0530 | -0.5110 | 0.5046 | 0.3685 | 3.3543  | 0.6455 | 2.7596   |
| MF0015 | CardioEmbolicStroke | Inverse variance weighted | 6  | 1.5585 | 0.9992 | 2.4310 | 0.0504 | -0.5110 | 0.5046 | 0.3685 | 3.3543  | 0.6455 | 2.7596   |
| MF0015 | CardioEmbolicStroke | Simple mode               | 6  | 1.7428 | 0.7302 | 4.1596 | 0.2661 | -0.5110 | 0.5046 | 0.3685 | 3.3543  | 0.6455 | 2.7596   |
| MF0015 | CardioEmbolicStroke | Weighted mode             | 6  | 1.7428 | 0.8004 | 3.7948 | 0.2206 | -0.5110 | 0.5046 | 0.3685 | 3.3543  | 0.6455 | 2.7596   |
| MF0015 | IschemicStroke      | MR Egger                  | 9  | 0.9300 | 0.6885 | 1.2562 | 0.6503 | 0.0129  | 0.0170 | 0.4741 | 12.5556 | 0.0837 | 140.7297 |
| MF0015 | IschemicStroke      | Weighted median           | 9  | 1.0522 | 0.9236 | 1.1988 | 0.4442 | 0.0129  | 0.0170 | 0.4741 | 12.5556 | 0.0837 | 140.7297 |
| MF0015 | IschemicStroke      | Inverse variance weighted | 9  | 1.0353 | 0.9260 | 1.1574 | 0.5425 | 0.0129  | 0.0170 | 0.4741 | 12.5556 | 0.0837 | 140.7297 |
| MF0015 | IschemicStroke      | Simple mode               | 9  | 1.0719 | 0.8721 | 1.3175 | 0.5281 | 0.0129  | 0.0170 | 0.4741 | 12.5556 | 0.0837 | 140.7297 |
| MF0015 | IschemicStroke      | Weighted mode             | 9  | 1.0719 | 0.8784 | 1.3080 | 0.5136 | 0.0129  | 0.0170 | 0.4741 | 12.5556 | 0.0837 | 140.7297 |
| MF0015 | LargeArteryStroke   | MR Egger                  | 8  | 0.7899 | 0.3531 | 1.7671 | 0.5868 | 0.0482  | 0.0443 | 0.3184 | 5.9724  | 0.5430 | 40.0181  |
| MF0015 | LargeArteryStroke   | Weighted median           | 8  | 1.0412 | 0.6989 | 1.5510 | 0.8427 | 0.0482  | 0.0443 | 0.3184 | 5.9724  | 0.5430 | 40.0181  |
| MF0015 | LargeArteryStroke   | Inverse variance weighted | 8  | 1.1997 | 0.9018 | 1.5960 | 0.2112 | 0.0482  | 0.0443 | 0.3184 | 5.9724  | 0.5430 | 40.0181  |
| MF0015 | LargeArteryStroke   | Simple mode               | 8  | 0.9395 | 0.5264 | 1.6765 | 0.8387 | 0.0482  | 0.0443 | 0.3184 | 5.9724  | 0.5430 | 40.0181  |
| MF0015 | LargeArteryStroke   | Weighted mode             | 8  | 0.9310 | 0.5295 | 1.6367 | 0.8109 | 0.0482  | 0.0443 | 0.3184 | 5.9724  | 0.5430 | 40.0181  |
| MF0015 | SmallVesselStroke   | MR Egger                  | 9  | 0.8593 | 0.5217 | 1.4155 | 0.5703 | 0.0125  | 0.0283 | 0.6728 | 10.6872 | 0.1529 | 73.8392  |
| MF0015 | SmallVesselStroke   | Weighted median           | 9  | 1.1065 | 0.8931 | 1.3709 | 0.3546 | 0.0125  | 0.0283 | 0.6728 | 10.6872 | 0.1529 | 73.8392  |
| MF0015 | SmallVesselStroke   | Inverse variance weighted | 9  | 0.9532 | 0.7959 | 1.1416 | 0.6027 | 0.0125  | 0.0283 | 0.6728 | 10.6872 | 0.1529 | 73.8392  |

|        |                     |                           |    |        |        |          |        |         |        |        |         |        |          |
|--------|---------------------|---------------------------|----|--------|--------|----------|--------|---------|--------|--------|---------|--------|----------|
| MF0015 | SmallVesselStroke   | Simple mode               | 9  | 1.1250 | 0.8426 | 1.5022   | 0.4475 | 0.0125  | 0.0283 | 0.6728 | 10.6872 | 0.1529 | 73.8392  |
| MF0015 | SmallVesselStroke   | Weighted mode             | 9  | 1.1250 | 0.8262 | 1.5320   | 0.4759 | 0.0125  | 0.0283 | 0.6728 | 10.6872 | 0.1529 | 73.8392  |
| MF0015 | Stroke              | MR Egger                  | 9  | 0.8879 | 0.6801 | 1.1591   | 0.4108 | 0.0134  | 0.0152 | 0.4084 | 15.8386 | 0.0447 | 118.7336 |
| MF0015 | Stroke              | Weighted median           | 9  | 1.0058 | 0.8966 | 1.1284   | 0.9214 | 0.0134  | 0.0152 | 0.4084 | 15.8386 | 0.0447 | 118.7336 |
| MF0015 | Stroke              | Inverse variance weighted | 9  | 0.9913 | 0.8951 | 1.0978   | 0.8665 | 0.0134  | 0.0152 | 0.4084 | 15.8386 | 0.0447 | 118.7336 |
| MF0015 | Stroke              | Simple mode               | 9  | 1.0285 | 0.8541 | 1.2385   | 0.7743 | 0.0134  | 0.0152 | 0.4084 | 15.8386 | 0.0447 | 118.7336 |
| MF0015 | Stroke              | Weighted mode             | 9  | 1.0204 | 0.8427 | 1.2356   | 0.8411 | 0.0134  | 0.0152 | 0.4084 | 15.8386 | 0.0447 | 118.7336 |
| MF0016 | CardioEmbolicStroke | MR Egger                  | 9  | 0.2084 | 0.0044 | 9.9479   | 0.4527 | 0.1521  | 0.1832 | 0.4337 | 25.2441 | 0.0014 | 1.0108   |
| MF0016 | CardioEmbolicStroke | Weighted median           | 9  | 0.8258 | 0.4324 | 1.5771   | 0.5620 | 0.1521  | 0.1832 | 0.4337 | 25.2441 | 0.0014 | 1.0108   |
| MF0016 | CardioEmbolicStroke | Inverse variance weighted | 9  | 1.0374 | 0.4875 | 2.2075   | 0.9242 | 0.1521  | 0.1832 | 0.4337 | 25.2441 | 0.0014 | 1.0108   |
| MF0016 | CardioEmbolicStroke | Simple mode               | 9  | 0.5677 | 0.2007 | 1.6060   | 0.3171 | 0.1521  | 0.1832 | 0.4337 | 25.2441 | 0.0014 | 1.0108   |
| MF0016 | CardioEmbolicStroke | Weighted mode             | 9  | 0.5094 | 0.2039 | 1.2724   | 0.1867 | 0.1521  | 0.1832 | 0.4337 | 25.2441 | 0.0014 | 1.0108   |
| MF0016 | IschemicStroke      | MR Egger                  | 15 | 1.0298 | 0.8598 | 1.2335   | 0.7546 | 0.0004  | 0.0105 | 0.9681 | 8.4337  | 0.8142 | 404.7659 |
| MF0016 | IschemicStroke      | Weighted median           | 15 | 0.9971 | 0.9010 | 1.1034   | 0.9546 | 0.0004  | 0.0105 | 0.9681 | 8.4337  | 0.8142 | 404.7659 |
| MF0016 | IschemicStroke      | Inverse variance weighted | 15 | 1.0333 | 0.9569 | 1.1159   | 0.4030 | 0.0004  | 0.0105 | 0.9681 | 8.4337  | 0.8142 | 404.7659 |
| MF0016 | IschemicStroke      | Simple mode               | 15 | 0.9607 | 0.8067 | 1.1442   | 0.6602 | 0.0004  | 0.0105 | 0.9681 | 8.4337  | 0.8142 | 404.7659 |
| MF0016 | IschemicStroke      | Weighted mode             | 15 | 0.9786 | 0.8447 | 1.1337   | 0.7773 | 0.0004  | 0.0105 | 0.9681 | 8.4337  | 0.8142 | 404.7659 |
| MF0016 | LargeArteryStroke   | MR Egger                  | 11 | 0.8478 | 0.2414 | 2.9781   | 0.8026 | -0.0050 | 0.0641 | 0.9399 | 14.8232 | 0.0959 | 5.5867   |
| MF0016 | LargeArteryStroke   | Weighted median           | 11 | 1.0104 | 0.6801 | 1.5012   | 0.9590 | -0.0050 | 0.0641 | 0.9399 | 14.8232 | 0.0959 | 5.5867   |
| MF0016 | LargeArteryStroke   | Inverse variance weighted | 11 | 0.8085 | 0.5685 | 1.1499   | 0.2369 | -0.0050 | 0.0641 | 0.9399 | 14.8232 | 0.0959 | 5.5867   |
| MF0016 | LargeArteryStroke   | Simple mode               | 11 | 1.0901 | 0.6079 | 1.9550   | 0.7781 | -0.0050 | 0.0641 | 0.9399 | 14.8232 | 0.0959 | 5.5867   |
| MF0016 | LargeArteryStroke   | Weighted mode             | 11 | 1.0654 | 0.6388 | 1.7769   | 0.8131 | -0.0050 | 0.0641 | 0.9399 | 14.8232 | 0.0959 | 5.5867   |
| MF0016 | SmallVesselStroke   | MR Egger                  | 12 | 0.6642 | 0.4015 | 1.0991   | 0.1424 | 0.0410  | 0.0262 | 0.1494 | 6.5580  | 0.8337 | 27.0031  |
| MF0016 | SmallVesselStroke   | Weighted median           | 12 | 0.9829 | 0.8047 | 1.2006   | 0.8661 | 0.0410  | 0.0262 | 0.1494 | 6.5580  | 0.8337 | 27.0031  |
| MF0016 | SmallVesselStroke   | Inverse variance weighted | 12 | 0.9726 | 0.8316 | 1.1376   | 0.7286 | 0.0410  | 0.0262 | 0.1494 | 6.5580  | 0.8337 | 27.0031  |
| MF0016 | SmallVesselStroke   | Simple mode               | 12 | 1.0987 | 0.7741 | 1.5595   | 0.6087 | 0.0410  | 0.0262 | 0.1494 | 6.5580  | 0.8337 | 27.0031  |
| MF0016 | SmallVesselStroke   | Weighted mode             | 12 | 1.0495 | 0.7576 | 1.4538   | 0.7768 | 0.0410  | 0.0262 | 0.1494 | 6.5580  | 0.8337 | 27.0031  |
| MF0016 | Stroke              | MR Egger                  | 15 | 0.9356 | 0.7688 | 1.1386   | 0.5178 | 0.0090  | 0.0110 | 0.4280 | 16.7511 | 0.2109 | 149.4838 |
| MF0016 | Stroke              | Weighted median           | 15 | 1.0178 | 0.9245 | 1.1204   | 0.7194 | 0.0090  | 0.0110 | 0.4280 | 16.7511 | 0.2109 | 149.4838 |
| MF0016 | Stroke              | Inverse variance weighted | 15 | 1.0086 | 0.9337 | 1.0896   | 0.8271 | 0.0090  | 0.0110 | 0.4280 | 16.7511 | 0.2109 | 149.4838 |
| MF0016 | Stroke              | Simple mode               | 15 | 0.9827 | 0.8333 | 1.1587   | 0.8382 | 0.0090  | 0.0110 | 0.4280 | 16.7511 | 0.2109 | 149.4838 |
| MF0016 | Stroke              | Weighted mode             | 15 | 0.9730 | 0.8394 | 1.1278   | 0.7217 | 0.0090  | 0.0110 | 0.4280 | 16.7511 | 0.2109 | 149.4838 |
| MF0017 | CardioEmbolicStroke | MR Egger                  | 11 | 1.8944 | 0.0044 | 813.2258 | 0.8409 | -0.0325 | 0.0864 | 0.7156 | 7.4029  | 0.5953 | 2.4973   |
| MF0017 | CardioEmbolicStroke | Weighted median           | 11 | 0.6412 | 0.1008 | 4.0808   | 0.6379 | -0.0325 | 0.0864 | 0.7156 | 7.4029  | 0.5953 | 2.4973   |
| MF0017 | CardioEmbolicStroke | Inverse variance weighted | 11 | 0.6092 | 0.1610 | 2.3043   | 0.4652 | -0.0325 | 0.0864 | 0.7156 | 7.4029  | 0.5953 | 2.4973   |
| MF0017 | CardioEmbolicStroke | Simple mode               | 11 | 0.7253 | 0.0386 | 13.6371  | 0.8344 | -0.0325 | 0.0864 | 0.7156 | 7.4029  | 0.5953 | 2.4973   |
| MF0017 | CardioEmbolicStroke | Weighted mode             | 11 | 0.6619 | 0.0474 | 9.2476   | 0.7653 | -0.0325 | 0.0864 | 0.7156 | 7.4029  | 0.5953 | 2.4973   |
| MF0017 | IschemicStroke      | MR Egger                  | 22 | 0.7191 | 0.4940 | 1.0467   | 0.1006 | 0.0153  | 0.0077 | 0.0621 | 21.2848 | 0.4417 | 4.8792   |
| MF0017 | IschemicStroke      | Weighted median           | 22 | 1.0838 | 0.8141 | 1.4428   | 0.5814 | 0.0153  | 0.0077 | 0.0621 | 21.2848 | 0.4417 | 4.8792   |
| MF0017 | IschemicStroke      | Inverse variance weighted | 22 | 0.9911 | 0.8109 | 1.2113   | 0.9303 | 0.0153  | 0.0077 | 0.0621 | 21.2848 | 0.4417 | 4.8792   |
| MF0017 | IschemicStroke      | Simple mode               | 22 | 1.0913 | 0.6897 | 1.7266   | 0.7129 | 0.0153  | 0.0077 | 0.0621 | 21.2848 | 0.4417 | 4.8792   |
| MF0017 | IschemicStroke      | Weighted mode             | 22 | 1.0845 | 0.7467 | 1.5753   | 0.6744 | 0.0153  | 0.0077 | 0.0621 | 21.2848 | 0.4417 | 4.8792   |
| MF0017 | LargeArteryStroke   | MR Egger                  | 15 | 0.8058 | 0.0904 | 7.1852   | 0.8496 | 0.0183  | 0.0392 | 0.6489 | 23.2913 | 0.0383 | 12.8298  |
| MF0017 | LargeArteryStroke   | Weighted median           | 15 | 2.1409 | 0.6965 | 6.5808   | 0.1839 | 0.0183  | 0.0392 | 0.6489 | 23.2913 | 0.0383 | 12.8298  |
| MF0017 | LargeArteryStroke   | Inverse variance weighted | 15 | 1.2759 | 0.4713 | 3.4542   | 0.6315 | 0.0183  | 0.0392 | 0.6489 | 23.2913 | 0.0383 | 12.8298  |
| MF0017 | LargeArteryStroke   | Simple mode               | 15 | 4.2343 | 0.5724 | 31.3230  | 0.1793 | 0.0183  | 0.0392 | 0.6489 | 23.2913 | 0.0383 | 12.8298  |
| MF0017 | LargeArteryStroke   | Weighted mode             | 15 | 4.1423 | 0.6269 | 27.3683  | 0.1623 | 0.0183  | 0.0392 | 0.6489 | 23.2913 | 0.0383 | 12.8298  |
| MF0017 | SmallVesselStroke   | MR Egger                  | 19 | 0.7114 | 0.2760 | 1.8337   | 0.4904 | 0.0132  | 0.0180 | 0.4741 | 23.2943 | 0.1399 | 1.4066   |
| MF0017 | SmallVesselStroke   | Weighted median           | 19 | 0.9030 | 0.4931 | 1.6534   | 0.7408 | 0.0132  | 0.0180 | 0.4741 | 23.2943 | 0.1399 | 1.4066   |
| MF0017 | SmallVesselStroke   | Inverse variance weighted | 19 | 0.9691 | 0.6157 | 1.5254   | 0.8921 | 0.0132  | 0.0180 | 0.4741 | 23.2943 | 0.1399 | 1.4066   |
| MF0017 | SmallVesselStroke   | Simple mode               | 19 | 0.8381 | 0.2568 | 2.7360   | 0.7732 | 0.0132  | 0.0180 | 0.4741 | 23.2943 | 0.1399 | 1.4066   |
| MF0017 | SmallVesselStroke   | Weighted mode             | 19 | 0.9869 | 0.3101 | 3.1405   | 0.9825 | 0.0132  | 0.0180 | 0.4741 | 23.2943 | 0.1399 | 1.4066   |
| MF0017 | Stroke              | MR Egger                  | 22 | 0.7334 | 0.4985 | 1.0789   | 0.1311 | 0.0135  | 0.0074 | 0.0825 | 18.1586 | 0.6389 | 5.1598   |

|        |                     |                           |    |        |        |         |        |         |        |        |         |        |            |
|--------|---------------------|---------------------------|----|--------|--------|---------|--------|---------|--------|--------|---------|--------|------------|
| MF0017 | Stroke              | Weighted median           | 22 | 0.9976 | 0.7689 | 1.2945  | 0.9858 | 0.0135  | 0.0074 | 0.0825 | 18.1586 | 0.6389 | 5.1598     |
| MF0017 | Stroke              | Inverse variance weighted | 22 | 1.0062 | 0.8367 | 1.2100  | 0.9478 | 0.0135  | 0.0074 | 0.0825 | 18.1586 | 0.6389 | 5.1598     |
| MF0017 | Stroke              | Simple mode               | 22 | 0.9735 | 0.6225 | 1.5224  | 0.9076 | 0.0135  | 0.0074 | 0.0825 | 18.1586 | 0.6389 | 5.1598     |
| MF0017 | Stroke              | Weighted mode             | 22 | 0.9904 | 0.6556 | 1.4963  | 0.9639 | 0.0135  | 0.0074 | 0.0825 | 18.1586 | 0.6389 | 5.1598     |
| MF0018 | CardioEmbolicStroke | MR Egger                  | 7  | 0.2345 | 0.0015 | 35.9972 | 0.5967 | -0.0014 | 0.0799 | 0.9866 | 1.0763  | 0.9562 | 2.9325     |
| MF0018 | CardioEmbolicStroke | Weighted median           | 7  | 0.2478 | 0.0451 | 1.3598  | 0.1082 | -0.0014 | 0.0799 | 0.9866 | 1.0763  | 0.9562 | 2.9325     |
| MF0018 | CardioEmbolicStroke | Inverse variance weighted | 7  | 0.2245 | 0.0577 | 0.8736  | 0.0312 | -0.0014 | 0.0799 | 0.9866 | 1.0763  | 0.9562 | 2.9325     |
| MF0018 | CardioEmbolicStroke | Simple mode               | 7  | 0.2885 | 0.0291 | 2.8616  | 0.3292 | -0.0014 | 0.0799 | 0.9866 | 1.0763  | 0.9562 | 2.9325     |
| MF0018 | CardioEmbolicStroke | Weighted mode             | 7  | 0.2645 | 0.0314 | 2.2239  | 0.2667 | -0.0014 | 0.0799 | 0.9866 | 1.0763  | 0.9562 | 2.9325     |
| MF0018 | IschemicStroke      | MR Egger                  | 17 | 0.8068 | 0.4858 | 1.3398  | 0.4198 | 0.0072  | 0.0106 | 0.5045 | 18.7225 | 0.2266 | 3.9558     |
| MF0018 | IschemicStroke      | Weighted median           | 17 | 0.9181 | 0.6601 | 1.2770  | 0.6118 | 0.0072  | 0.0106 | 0.5045 | 18.7225 | 0.2266 | 3.9558     |
| MF0018 | IschemicStroke      | Inverse variance weighted | 17 | 0.9421 | 0.7408 | 1.1981  | 0.6267 | 0.0072  | 0.0106 | 0.5045 | 18.7225 | 0.2266 | 3.9558     |
| MF0018 | IschemicStroke      | Simple mode               | 17 | 0.6517 | 0.3408 | 1.2461  | 0.2138 | 0.0072  | 0.0106 | 0.5045 | 18.7225 | 0.2266 | 3.9558     |
| MF0018 | IschemicStroke      | Weighted mode             | 17 | 1.2395 | 0.6477 | 2.3721  | 0.5260 | 0.0072  | 0.0106 | 0.5045 | 18.7225 | 0.2266 | 3.9558     |
| MF0018 | LargeArteryStroke   | MR Egger                  | 11 | 0.0849 | 0.0070 | 1.0334  | 0.0851 | 0.0825  | 0.0440 | 0.0938 | 8.7678  | 0.5543 | 1.2645     |
| MF0018 | LargeArteryStroke   | Weighted median           | 11 | 0.7217 | 0.2095 | 2.4861  | 0.6052 | 0.0825  | 0.0440 | 0.0938 | 8.7678  | 0.5543 | 1.2645     |
| MF0018 | LargeArteryStroke   | Inverse variance weighted | 11 | 0.7962 | 0.3328 | 1.9051  | 0.6087 | 0.0825  | 0.0440 | 0.0938 | 8.7678  | 0.5543 | 1.2645     |
| MF0018 | LargeArteryStroke   | Simple mode               | 11 | 0.6992 | 0.0790 | 6.1882  | 0.7543 | 0.0825  | 0.0440 | 0.0938 | 8.7678  | 0.5543 | 1.2645     |
| MF0018 | LargeArteryStroke   | Weighted mode             | 11 | 0.5170 | 0.0879 | 3.0412  | 0.4823 | 0.0825  | 0.0440 | 0.0938 | 8.7678  | 0.5543 | 1.2645     |
| MF0018 | SmallVesselStroke   | MR Egger                  | 11 | 0.4245 | 0.1059 | 1.7019  | 0.2573 | 0.0349  | 0.0245 | 0.1880 | 6.9113  | 0.7338 | 1.6754     |
| MF0018 | SmallVesselStroke   | Weighted median           | 11 | 1.1383 | 0.5986 | 2.1645  | 0.6929 | 0.0349  | 0.0245 | 0.1880 | 6.9113  | 0.7338 | 1.6754     |
| MF0018 | SmallVesselStroke   | Inverse variance weighted | 11 | 1.0933 | 0.6737 | 1.7742  | 0.7181 | 0.0349  | 0.0245 | 0.1880 | 6.9113  | 0.7338 | 1.6754     |
| MF0018 | SmallVesselStroke   | Simple mode               | 11 | 1.0752 | 0.4026 | 2.8718  | 0.8878 | 0.0349  | 0.0245 | 0.1880 | 6.9113  | 0.7338 | 1.6754     |
| MF0018 | SmallVesselStroke   | Weighted mode             | 11 | 1.1127 | 0.4686 | 2.6422  | 0.8137 | 0.0349  | 0.0245 | 0.1880 | 6.9113  | 0.7338 | 1.6754     |
| MF0018 | Stroke              | MR Egger                  | 18 | 0.7752 | 0.4941 | 1.2163  | 0.2843 | 0.0115  | 0.0089 | 0.2170 | 14.5239 | 0.6297 | 5.7773     |
| MF0018 | Stroke              | Weighted median           | 18 | 0.9797 | 0.7384 | 1.2999  | 0.8869 | 0.0115  | 0.0089 | 0.2170 | 14.5239 | 0.6297 | 5.7773     |
| MF0018 | Stroke              | Inverse variance weighted | 18 | 1.0113 | 0.8309 | 1.2307  | 0.9110 | 0.0115  | 0.0089 | 0.2170 | 14.5239 | 0.6297 | 5.7773     |
| MF0018 | Stroke              | Simple mode               | 18 | 1.2032 | 0.7027 | 2.0603  | 0.5093 | 0.0115  | 0.0089 | 0.2170 | 14.5239 | 0.6297 | 5.7773     |
| MF0018 | Stroke              | Weighted mode             | 18 | 0.8522 | 0.5167 | 1.4057  | 0.5395 | 0.0115  | 0.0089 | 0.2170 | 14.5239 | 0.6297 | 5.7773     |
| MF0019 | CardioEmbolicStroke | MR Egger                  | 10 | 0.5008 | 0.2042 | 1.2285  | 0.1694 | 0.0260  | 0.0407 | 0.5402 | 2.7681  | 0.9481 | 4.4127     |
| MF0019 | CardioEmbolicStroke | Weighted median           | 10 | 0.5594 | 0.3120 | 1.0029  | 0.0511 | 0.0260  | 0.0407 | 0.5402 | 2.7681  | 0.9481 | 4.4127     |
| MF0019 | CardioEmbolicStroke | Inverse variance weighted | 10 | 0.6454 | 0.4121 | 1.0109  | 0.0558 | 0.0260  | 0.0407 | 0.5402 | 2.7681  | 0.9481 | 4.4127     |
| MF0019 | CardioEmbolicStroke | Simple mode               | 10 | 0.4958 | 0.2038 | 1.2059  | 0.1562 | 0.0260  | 0.0407 | 0.5402 | 2.7681  | 0.9481 | 4.4127     |
| MF0019 | CardioEmbolicStroke | Weighted mode             | 10 | 0.4837 | 0.2255 | 1.0373  | 0.0949 | 0.0260  | 0.0407 | 0.5402 | 2.7681  | 0.9481 | 4.4127     |
| MF0019 | IschemicStroke      | MR Egger                  | 33 | 1.0098 | 0.9135 | 1.1162  | 0.8505 | -0.0098 | 0.0072 | 0.1821 | 35.5970 | 0.3027 | -120.1386  |
| MF0019 | IschemicStroke      | Weighted median           | 33 | 0.9213 | 0.8420 | 1.0081  | 0.0743 | -0.0098 | 0.0072 | 0.1821 | 35.5970 | 0.3027 | -120.1386  |
| MF0019 | IschemicStroke      | Inverse variance weighted | 33 | 0.9556 | 0.8978 | 1.0172  | 0.1541 | -0.0098 | 0.0072 | 0.1821 | 35.5970 | 0.3027 | -120.1386  |
| MF0019 | IschemicStroke      | Simple mode               | 33 | 0.9404 | 0.8058 | 1.0976  | 0.4416 | -0.0098 | 0.0072 | 0.1821 | 35.5970 | 0.3027 | -120.1386  |
| MF0019 | IschemicStroke      | Weighted mode             | 33 | 0.9373 | 0.8260 | 1.0636  | 0.3227 | -0.0098 | 0.0072 | 0.1821 | 35.5970 | 0.3027 | -120.1386  |
| MF0019 | LargeArteryStroke   | MR Egger                  | 16 | 0.8655 | 0.5373 | 1.3940  | 0.5619 | -0.0202 | 0.0261 | 0.4525 | 14.0010 | 0.4496 | 17.6707    |
| MF0019 | LargeArteryStroke   | Weighted median           | 16 | 0.7249 | 0.4952 | 1.0614  | 0.0982 | -0.0202 | 0.0261 | 0.4525 | 14.0010 | 0.4496 | 17.6707    |
| MF0019 | LargeArteryStroke   | Inverse variance weighted | 16 | 0.7399 | 0.5689 | 0.9624  | 0.0247 | -0.0202 | 0.0261 | 0.4525 | 14.0010 | 0.4496 | 17.6707    |
| MF0019 | LargeArteryStroke   | Simple mode               | 16 | 0.8791 | 0.4650 | 1.6619  | 0.6973 | -0.0202 | 0.0261 | 0.4525 | 14.0010 | 0.4496 | 17.6707    |
| MF0019 | LargeArteryStroke   | Weighted mode             | 16 | 0.7075 | 0.4374 | 1.1445  | 0.1789 | -0.0202 | 0.0261 | 0.4525 | 14.0010 | 0.4496 | 17.6707    |
| MF0019 | SmallVesselStroke   | MR Egger                  | 17 | 0.8815 | 0.6348 | 1.2243  | 0.4635 | 0.0019  | 0.0185 | 0.9179 | 25.4117 | 0.0447 | 41.5908    |
| MF0019 | SmallVesselStroke   | Weighted median           | 17 | 0.8585 | 0.6985 | 1.0550  | 0.1469 | 0.0019  | 0.0185 | 0.9179 | 25.4117 | 0.0447 | 41.5908    |
| MF0019 | SmallVesselStroke   | Inverse variance weighted | 17 | 0.8944 | 0.7477 | 1.0700  | 0.2224 | 0.0019  | 0.0185 | 0.9179 | 25.4117 | 0.0447 | 41.5908    |
| MF0019 | SmallVesselStroke   | Simple mode               | 17 | 0.8034 | 0.5669 | 1.1386  | 0.2363 | 0.0019  | 0.0185 | 0.9179 | 25.4117 | 0.0447 | 41.5908    |
| MF0019 | SmallVesselStroke   | Weighted mode             | 17 | 0.8085 | 0.6261 | 1.0441  | 0.1228 | 0.0019  | 0.0185 | 0.9179 | 25.4117 | 0.0447 | 41.5908    |
| MF0019 | Stroke              | MR Egger                  | 24 | 1.0232 | 0.8923 | 1.1734  | 0.7453 | -0.0087 | 0.0077 | 0.2710 | 30.6155 | 0.1325 | 10903.9049 |
| MF0019 | Stroke              | Weighted median           | 24 | 0.9386 | 0.8458 | 1.0416  | 0.2329 | -0.0087 | 0.0077 | 0.2710 | 30.6155 | 0.1325 | 10903.9049 |
| MF0019 | Stroke              | Inverse variance weighted | 24 | 0.9589 | 0.8868 | 1.0370  | 0.2938 | -0.0087 | 0.0077 | 0.2710 | 30.6155 | 0.1325 | 10903.9049 |
| MF0019 | Stroke              | Simple mode               | 24 | 0.8743 | 0.7275 | 1.0506  | 0.1652 | -0.0087 | 0.0077 | 0.2710 | 30.6155 | 0.1325 | 10903.9049 |

|        |                     |                           |    |        |        |         |        |         |        |        |         |        |            |
|--------|---------------------|---------------------------|----|--------|--------|---------|--------|---------|--------|--------|---------|--------|------------|
| MF0019 | Stroke              | Weighted mode             | 24 | 0.9148 | 0.7718 | 1.0842  | 0.3148 | -0.0087 | 0.0077 | 0.2710 | 30.6155 | 0.1325 | 10903.9049 |
| MF0020 | CardioEmbolicStroke | MR Egger                  | 13 | 0.7271 | 0.1548 | 3.4141  | 0.6940 | 0.0460  | 0.0855 | 0.6012 | 19.6818 | 0.0499 | 3.1462     |
| MF0020 | CardioEmbolicStroke | Weighted median           | 13 | 0.9864 | 0.6200 | 1.5692  | 0.9538 | 0.0460  | 0.0855 | 0.6012 | 19.6818 | 0.0499 | 3.1462     |
| MF0020 | CardioEmbolicStroke | Inverse variance weighted | 13 | 1.0953 | 0.7393 | 1.6228  | 0.6499 | 0.0460  | 0.0855 | 0.6012 | 19.6818 | 0.0499 | 3.1462     |
| MF0020 | CardioEmbolicStroke | Simple mode               | 13 | 0.8921 | 0.3758 | 2.1177  | 0.8001 | 0.0460  | 0.0855 | 0.6012 | 19.6818 | 0.0499 | 3.1462     |
| MF0020 | CardioEmbolicStroke | Weighted mode             | 13 | 0.9177 | 0.3988 | 2.1118  | 0.8433 | 0.0460  | 0.0855 | 0.6012 | 19.6818 | 0.0499 | 3.1462     |
| MF0020 | IschemicStroke      | MR Egger                  | 20 | 0.9434 | 0.7896 | 1.1271  | 0.5288 | 0.0146  | 0.0112 | 0.2078 | 27.3117 | 0.0976 | 12070.0993 |
| MF0020 | IschemicStroke      | Weighted median           | 20 | 1.0414 | 0.9528 | 1.1382  | 0.3716 | 0.0146  | 0.0112 | 0.2078 | 27.3117 | 0.0976 | 12070.0993 |
| MF0020 | IschemicStroke      | Inverse variance weighted | 20 | 1.0518 | 0.9786 | 1.1305  | 0.1699 | 0.0146  | 0.0112 | 0.2078 | 27.3117 | 0.0976 | 12070.0993 |
| MF0020 | IschemicStroke      | Simple mode               | 20 | 1.0235 | 0.8763 | 1.1954  | 0.7727 | 0.0146  | 0.0112 | 0.2078 | 27.3117 | 0.0976 | 12070.0993 |
| MF0020 | IschemicStroke      | Weighted mode             | 20 | 1.0281 | 0.9097 | 1.1619  | 0.6617 | 0.0146  | 0.0112 | 0.2078 | 27.3117 | 0.0976 | 12070.0993 |
| MF0020 | LargeArteryStroke   | MR Egger                  | 15 | 0.7813 | 0.3865 | 1.5796  | 0.5041 | 0.0517  | 0.0407 | 0.2264 | 5.5768  | 0.9761 | 35.0442    |
| MF0020 | LargeArteryStroke   | Weighted median           | 15 | 1.2467 | 0.9370 | 1.6587  | 0.1302 | 0.0517  | 0.0407 | 0.2264 | 5.5768  | 0.9761 | 35.0442    |
| MF0020 | LargeArteryStroke   | Inverse variance weighted | 15 | 1.2067 | 0.9752 | 1.4932  | 0.0838 | 0.0517  | 0.0407 | 0.2264 | 5.5768  | 0.9761 | 35.0442    |
| MF0020 | LargeArteryStroke   | Simple mode               | 15 | 1.2574 | 0.8052 | 1.9636  | 0.3310 | 0.0517  | 0.0407 | 0.2264 | 5.5768  | 0.9761 | 35.0442    |
| MF0020 | LargeArteryStroke   | Weighted mode             | 15 | 1.2574 | 0.8079 | 1.9570  | 0.3274 | 0.0517  | 0.0407 | 0.2264 | 5.5768  | 0.9761 | 35.0442    |
| MF0020 | SmallVesselStroke   | MR Egger                  | 16 | 1.2459 | 0.8527 | 1.8204  | 0.2748 | -0.0148 | 0.0221 | 0.5148 | 6.6643  | 0.9469 | 83.3392    |
| MF0020 | SmallVesselStroke   | Weighted median           | 16 | 1.1747 | 1.0045 | 1.3737  | 0.0437 | -0.0148 | 0.0221 | 0.5148 | 6.6643  | 0.9469 | 83.3392    |
| MF0020 | SmallVesselStroke   | Inverse variance weighted | 16 | 1.1017 | 0.9798 | 1.2388  | 0.1054 | -0.0148 | 0.0221 | 0.5148 | 6.6643  | 0.9469 | 83.3392    |
| MF0020 | SmallVesselStroke   | Simple mode               | 16 | 1.2340 | 0.9318 | 1.6343  | 0.1630 | -0.0148 | 0.0221 | 0.5148 | 6.6643  | 0.9469 | 83.3392    |
| MF0020 | SmallVesselStroke   | Weighted mode             | 16 | 1.2413 | 0.9590 | 1.6067  | 0.1215 | -0.0148 | 0.0221 | 0.5148 | 6.6643  | 0.9469 | 83.3392    |
| MF0020 | Stroke              | MR Egger                  | 19 | 0.9358 | 0.7993 | 1.0957  | 0.4212 | 0.0126  | 0.0097 | 0.2093 | 22.8437 | 0.1967 | 1329.4789  |
| MF0020 | Stroke              | Weighted median           | 19 | 1.0242 | 0.9486 | 1.1058  | 0.5405 | 0.0126  | 0.0097 | 0.2093 | 22.8437 | 0.1967 | 1329.4789  |
| MF0020 | Stroke              | Inverse variance weighted | 19 | 1.0317 | 0.9719 | 1.0951  | 0.3058 | 0.0126  | 0.0097 | 0.2093 | 22.8437 | 0.1967 | 1329.4789  |
| MF0020 | Stroke              | Simple mode               | 19 | 1.0286 | 0.8848 | 1.1957  | 0.7179 | 0.0126  | 0.0097 | 0.2093 | 22.8437 | 0.1967 | 1329.4789  |
| MF0020 | Stroke              | Weighted mode             | 19 | 1.0440 | 0.9238 | 1.1799  | 0.4990 | 0.0126  | 0.0097 | 0.2093 | 22.8437 | 0.1967 | 1329.4789  |
| MF0021 | CardioEmbolicStroke | MR Egger                  | 5  | 0.7273 | 0.0078 | 67.4099 | 0.8991 | -0.0026 | 0.1167 | 0.9836 | 0.5730  | 0.9026 | 2.2048     |
| MF0021 | CardioEmbolicStroke | Weighted median           | 5  | 0.8701 | 0.1681 | 4.5041  | 0.8682 | -0.0026 | 0.1167 | 0.9836 | 0.5730  | 0.9026 | 2.2048     |
| MF0021 | CardioEmbolicStroke | Inverse variance weighted | 5  | 0.6924 | 0.1710 | 2.8033  | 0.6064 | -0.0026 | 0.1167 | 0.9836 | 0.5730  | 0.9026 | 2.2048     |
| MF0021 | CardioEmbolicStroke | Simple mode               | 5  | 0.9542 | 0.0844 | 10.7826 | 0.9716 | -0.0026 | 0.1167 | 0.9836 | 0.5730  | 0.9026 | 2.2048     |
| MF0021 | CardioEmbolicStroke | Weighted mode             | 5  | 0.9897 | 0.1144 | 8.5643  | 0.9929 | -0.0026 | 0.1167 | 0.9836 | 0.5730  | 0.9026 | 2.2048     |
| MF0021 | IschemicStroke      | MR Egger                  | 18 | 0.9745 | 0.7970 | 1.1916  | 0.8046 | 0.0018  | 0.0097 | 0.8565 | 11.7741 | 0.7594 | 74.3620    |
| MF0021 | IschemicStroke      | Weighted median           | 18 | 0.9226 | 0.7691 | 1.1067  | 0.3856 | 0.0018  | 0.0097 | 0.8565 | 11.7741 | 0.7594 | 74.3620    |
| MF0021 | IschemicStroke      | Inverse variance weighted | 18 | 0.9889 | 0.8717 | 1.1219  | 0.8628 | 0.0018  | 0.0097 | 0.8565 | 11.7741 | 0.7594 | 74.3620    |
| MF0021 | IschemicStroke      | Simple mode               | 18 | 1.2253 | 0.8751 | 1.7156  | 0.2531 | 0.0018  | 0.0097 | 0.8565 | 11.7741 | 0.7594 | 74.3620    |
| MF0021 | IschemicStroke      | Weighted mode             | 18 | 0.9175 | 0.7211 | 1.1673  | 0.4928 | 0.0018  | 0.0097 | 0.8565 | 11.7741 | 0.7594 | 74.3620    |
| MF0021 | LargeArteryStroke   | MR Egger                  | 11 | 0.6155 | 0.2283 | 1.6594  | 0.3626 | 0.0463  | 0.0433 | 0.3124 | 12.0924 | 0.2789 | 2.0513     |
| MF0021 | LargeArteryStroke   | Weighted median           | 11 | 0.9635 | 0.4390 | 2.1149  | 0.9262 | 0.0463  | 0.0433 | 0.3124 | 12.0924 | 0.2789 | 2.0513     |
| MF0021 | LargeArteryStroke   | Inverse variance weighted | 11 | 0.9486 | 0.5202 | 1.7300  | 0.8634 | 0.0463  | 0.0433 | 0.3124 | 12.0924 | 0.2789 | 2.0513     |
| MF0021 | LargeArteryStroke   | Simple mode               | 11 | 1.3078 | 0.3998 | 4.2782  | 0.6666 | 0.0463  | 0.0433 | 0.3124 | 12.0924 | 0.2789 | 2.0513     |
| MF0021 | LargeArteryStroke   | Weighted mode             | 11 | 1.0405 | 0.4319 | 2.5065  | 0.9312 | 0.0463  | 0.0433 | 0.3124 | 12.0924 | 0.2789 | 2.0513     |
| MF0021 | SmallVesselStroke   | MR Egger                  | 11 | 1.6540 | 0.9873 | 2.7710  | 0.0883 | -0.0192 | 0.0222 | 0.4092 | 7.3714  | 0.5985 | 6.0768     |
| MF0021 | SmallVesselStroke   | Weighted median           | 11 | 1.6100 | 1.0648 | 2.4344  | 0.0240 | -0.0192 | 0.0222 | 0.4092 | 7.3714  | 0.5985 | 6.0768     |
| MF0021 | SmallVesselStroke   | Inverse variance weighted | 11 | 1.3770 | 1.0133 | 1.8713  | 0.0409 | -0.0192 | 0.0222 | 0.4092 | 7.3714  | 0.5985 | 6.0768     |
| MF0021 | SmallVesselStroke   | Simple mode               | 11 | 1.5885 | 0.8421 | 2.9964  | 0.1834 | -0.0192 | 0.0222 | 0.4092 | 7.3714  | 0.5985 | 6.0768     |
| MF0021 | SmallVesselStroke   | Weighted mode             | 11 | 1.6697 | 1.0153 | 2.7457  | 0.0710 | -0.0192 | 0.0222 | 0.4092 | 7.3714  | 0.5985 | 6.0768     |
| MF0021 | Stroke              | MR Egger                  | 13 | 1.1161 | 0.8521 | 1.4618  | 0.4420 | 0.0004  | 0.0112 | 0.9733 | 11.2015 | 0.4265 | 24.8610    |
| MF0021 | Stroke              | Weighted median           | 13 | 1.1476 | 0.9380 | 1.4042  | 0.1810 | 0.0004  | 0.0112 | 0.9733 | 11.2015 | 0.4265 | 24.8610    |
| MF0021 | Stroke              | Inverse variance weighted | 13 | 1.1204 | 0.9657 | 1.2999  | 0.1336 | 0.0004  | 0.0112 | 0.9733 | 11.2015 | 0.4265 | 24.8610    |
| MF0021 | Stroke              | Simple mode               | 13 | 1.1364 | 0.8469 | 1.5247  | 0.4107 | 0.0004  | 0.0112 | 0.9733 | 11.2015 | 0.4265 | 24.8610    |
| MF0021 | Stroke              | Weighted mode             | 13 | 1.1489 | 0.8896 | 1.4837  | 0.3084 | 0.0004  | 0.0112 | 0.9733 | 11.2015 | 0.4265 | 24.8610    |
| MF0022 | CardioEmbolicStroke | MR Egger                  | 9  | 1.2995 | 0.1707 | 9.8956  | 0.8076 | -0.0567 | 0.0665 | 0.4226 | 6.1492  | 0.5224 | 1.0348     |
| MF0022 | CardioEmbolicStroke | Weighted median           | 9  | 0.6730 | 0.2126 | 2.1304  | 0.5005 | -0.0567 | 0.0665 | 0.4226 | 6.1492  | 0.5224 | 1.0348     |

|        |                     |                           |    |        |        |        |        |         |        |        |         |        |             |
|--------|---------------------|---------------------------|----|--------|--------|--------|--------|---------|--------|--------|---------|--------|-------------|
| MF0022 | CardioEmbolicStroke | Inverse variance weighted | 9  | 0.5792 | 0.2568 | 1.3063 | 0.1881 | -0.0567 | 0.0665 | 0.4226 | 6.1492  | 0.5224 | 1.0348      |
| MF0022 | CardioEmbolicStroke | Simple mode               | 9  | 0.8312 | 0.1315 | 5.2540 | 0.8491 | -0.0567 | 0.0665 | 0.4226 | 6.1492  | 0.5224 | 1.0348      |
| MF0022 | CardioEmbolicStroke | Weighted mode             | 9  | 0.7351 | 0.1182 | 4.5724 | 0.7498 | -0.0567 | 0.0665 | 0.4226 | 6.1492  | 0.5224 | 1.0348      |
| MF0022 | IschemicStroke      | MR Egger                  | 27 | 1.0150 | 0.8263 | 1.2467 | 0.8886 | 0.0011  | 0.0113 | 0.9249 | 37.9592 | 0.0467 | 270.7124    |
| MF0022 | IschemicStroke      | Weighted median           | 27 | 1.0608 | 0.9213 | 1.2213 | 0.4118 | 0.0011  | 0.0113 | 0.9249 | 37.9592 | 0.0467 | 270.7124    |
| MF0022 | IschemicStroke      | Inverse variance weighted | 27 | 1.0234 | 0.9134 | 1.1465 | 0.6904 | 0.0011  | 0.0113 | 0.9249 | 37.9592 | 0.0467 | 270.7124    |
| MF0022 | IschemicStroke      | Simple mode               | 27 | 1.1894 | 0.9055 | 1.5623 | 0.2237 | 0.0011  | 0.0113 | 0.9249 | 37.9592 | 0.0467 | 270.7124    |
| MF0022 | IschemicStroke      | Weighted mode             | 27 | 1.1364 | 0.8670 | 1.4894 | 0.3629 | 0.0011  | 0.0113 | 0.9249 | 37.9592 | 0.0467 | 270.7124    |
| MF0022 | LargeArteryStroke   | MR Egger                  | 16 | 0.8846 | 0.3961 | 1.9754 | 0.7692 | 0.0174  | 0.0369 | 0.6446 | 18.1317 | 0.2008 | 5.2335      |
| MF0022 | LargeArteryStroke   | Weighted median           | 16 | 0.9816 | 0.5252 | 1.8346 | 0.9535 | 0.0174  | 0.0369 | 0.6446 | 18.1317 | 0.2008 | 5.2335      |
| MF0022 | LargeArteryStroke   | Inverse variance weighted | 16 | 1.0383 | 0.6708 | 1.6073 | 0.8660 | 0.0174  | 0.0369 | 0.6446 | 18.1317 | 0.2008 | 5.2335      |
| MF0022 | LargeArteryStroke   | Simple mode               | 16 | 1.7188 | 0.5685 | 5.1966 | 0.3525 | 0.0174  | 0.0369 | 0.6446 | 18.1317 | 0.2008 | 5.2335      |
| MF0022 | LargeArteryStroke   | Weighted mode             | 16 | 0.8562 | 0.3190 | 2.2979 | 0.7622 | 0.0174  | 0.0369 | 0.6446 | 18.1317 | 0.2008 | 5.2335      |
| MF0022 | SmallVesselStroke   | MR Egger                  | 16 | 0.7128 | 0.4344 | 1.1695 | 0.2015 | 0.0266  | 0.0229 | 0.2648 | 25.2531 | 0.0466 | 11.0614     |
| MF0022 | SmallVesselStroke   | Weighted median           | 16 | 0.7871 | 0.5601 | 1.1061 | 0.1679 | 0.0266  | 0.0229 | 0.2648 | 25.2531 | 0.0466 | 11.0614     |
| MF0022 | SmallVesselStroke   | Inverse variance weighted | 16 | 0.9089 | 0.6866 | 1.2033 | 0.5047 | 0.0266  | 0.0229 | 0.2648 | 25.2531 | 0.0466 | 11.0614     |
| MF0022 | SmallVesselStroke   | Simple mode               | 16 | 0.7957 | 0.4480 | 1.4133 | 0.4478 | 0.0266  | 0.0229 | 0.2648 | 25.2531 | 0.0466 | 11.0614     |
| MF0022 | SmallVesselStroke   | Weighted mode             | 16 | 0.7327 | 0.4864 | 1.1037 | 0.1575 | 0.0266  | 0.0229 | 0.2648 | 25.2531 | 0.0466 | 11.0614     |
| MF0022 | Stroke              | MR Egger                  | 21 | 1.0370 | 0.8359 | 1.2863 | 0.7449 | -0.0010 | 0.0097 | 0.9178 | 22.1725 | 0.2758 | 59.3674     |
| MF0022 | Stroke              | Weighted median           | 21 | 1.0075 | 0.8663 | 1.1717 | 0.9230 | -0.0010 | 0.0097 | 0.9178 | 22.1725 | 0.2758 | 59.3674     |
| MF0022 | Stroke              | Inverse variance weighted | 21 | 1.0268 | 0.9202 | 1.1458 | 0.6358 | -0.0010 | 0.0097 | 0.9178 | 22.1725 | 0.2758 | 59.3674     |
| MF0022 | Stroke              | Simple mode               | 21 | 1.1024 | 0.8444 | 1.4393 | 0.4819 | -0.0010 | 0.0097 | 0.9178 | 22.1725 | 0.2758 | 59.3674     |
| MF0022 | Stroke              | Weighted mode             | 21 | 1.0116 | 0.7891 | 1.2967 | 0.9287 | -0.0010 | 0.0097 | 0.9178 | 22.1725 | 0.2758 | 59.3674     |
| MF0024 | CardioEmbolicStroke | MR Egger                  | 12 | 1.2043 | 0.8800 | 1.6480 | 0.2724 | -0.0184 | 0.0597 | 0.7638 | 6.6822  | 0.7551 | -38.3138    |
| MF0024 | CardioEmbolicStroke | Weighted median           | 12 | 1.1480 | 1.0092 | 1.3058 | 0.0358 | -0.0184 | 0.0597 | 0.7638 | 6.6822  | 0.7551 | -38.3138    |
| MF0024 | CardioEmbolicStroke | Inverse variance weighted | 12 | 1.1490 | 1.0420 | 1.2671 | 0.0054 | -0.0184 | 0.0597 | 0.7638 | 6.6822  | 0.7551 | -38.3138    |
| MF0024 | CardioEmbolicStroke | Simple mode               | 12 | 1.1163 | 0.9097 | 1.3698 | 0.3145 | -0.0184 | 0.0597 | 0.7638 | 6.6822  | 0.7551 | -38.3138    |
| MF0024 | CardioEmbolicStroke | Weighted mode             | 12 | 1.1386 | 0.9285 | 1.3962 | 0.2383 | -0.0184 | 0.0597 | 0.7638 | 6.6822  | 0.7551 | -38.3138    |
| MF0024 | IschemicStroke      | MR Egger                  | 19 | 1.0185 | 0.9670 | 1.0728 | 0.4973 | -0.0091 | 0.0111 | 0.4252 | 17.3582 | 0.4304 | -88.8757    |
| MF0024 | IschemicStroke      | Weighted median           | 19 | 0.9938 | 0.9684 | 1.0200 | 0.6403 | -0.0091 | 0.0111 | 0.4252 | 17.3582 | 0.4304 | -88.8757    |
| MF0024 | IschemicStroke      | Inverse variance weighted | 19 | 0.9983 | 0.9795 | 1.0174 | 0.8576 | -0.0091 | 0.0111 | 0.4252 | 17.3582 | 0.4304 | -88.8757    |
| MF0024 | IschemicStroke      | Simple mode               | 19 | 0.9864 | 0.9396 | 1.0355 | 0.5878 | -0.0091 | 0.0111 | 0.4252 | 17.3582 | 0.4304 | -88.8757    |
| MF0024 | IschemicStroke      | Weighted mode             | 19 | 0.9847 | 0.9380 | 1.0338 | 0.5433 | -0.0091 | 0.0111 | 0.4252 | 17.3582 | 0.4304 | -88.8757    |
| MF0024 | LargeArteryStroke   | MR Egger                  | 17 | 1.0640 | 0.8908 | 1.2707 | 0.5043 | -0.0353 | 0.0370 | 0.3547 | 9.8456  | 0.8746 | -31.5431    |
| MF0024 | LargeArteryStroke   | Weighted median           | 17 | 0.9611 | 0.8841 | 1.0448 | 0.3521 | -0.0353 | 0.0370 | 0.3547 | 9.8456  | 0.8746 | -31.5431    |
| MF0024 | LargeArteryStroke   | Inverse variance weighted | 17 | 0.9814 | 0.9206 | 1.0463 | 0.5660 | -0.0353 | 0.0370 | 0.3547 | 9.8456  | 0.8746 | -31.5431    |
| MF0024 | LargeArteryStroke   | Simple mode               | 17 | 0.9405 | 0.8094 | 1.0929 | 0.4352 | -0.0353 | 0.0370 | 0.3547 | 9.8456  | 0.8746 | -31.5431    |
| MF0024 | LargeArteryStroke   | Weighted mode             | 17 | 0.9459 | 0.8189 | 1.0927 | 0.4609 | -0.0353 | 0.0370 | 0.3547 | 9.8456  | 0.8746 | -31.5431    |
| MF0024 | SmallVesselStroke   | MR Egger                  | 18 | 1.0091 | 0.9158 | 1.1118 | 0.8574 | 0.0054  | 0.0206 | 0.7953 | 17.1901 | 0.3734 | -29.0227    |
| MF0024 | SmallVesselStroke   | Weighted median           | 18 | 1.0335 | 0.9847 | 1.0847 | 0.1816 | 0.0054  | 0.0206 | 0.7953 | 17.1901 | 0.3734 | -29.0227    |
| MF0024 | SmallVesselStroke   | Inverse variance weighted | 18 | 1.0214 | 0.9863 | 1.0577 | 0.2360 | 0.0054  | 0.0206 | 0.7953 | 17.1901 | 0.3734 | -29.0227    |
| MF0024 | SmallVesselStroke   | Simple mode               | 18 | 1.0491 | 0.9623 | 1.1437 | 0.2917 | 0.0054  | 0.0206 | 0.7953 | 17.1901 | 0.3734 | -29.0227    |
| MF0024 | SmallVesselStroke   | Weighted mode             | 18 | 1.0521 | 0.9706 | 1.1403 | 0.2336 | 0.0054  | 0.0206 | 0.7953 | 17.1901 | 0.3734 | -29.0227    |
| MF0024 | Stroke              | MR Egger                  | 21 | 1.0034 | 0.9583 | 1.0506 | 0.8880 | -0.0018 | 0.0099 | 0.8613 | 23.0762 | 0.2340 | -84.2156    |
| MF0024 | Stroke              | Weighted median           | 21 | 0.9961 | 0.9728 | 1.0200 | 0.7466 | -0.0018 | 0.0099 | 0.8613 | 23.0762 | 0.2340 | -84.2156    |
| MF0024 | Stroke              | Inverse variance weighted | 21 | 0.9995 | 0.9828 | 1.0165 | 0.9540 | -0.0018 | 0.0099 | 0.8613 | 23.0762 | 0.2340 | -84.2156    |
| MF0024 | Stroke              | Simple mode               | 21 | 0.9933 | 0.9499 | 1.0387 | 0.7699 | -0.0018 | 0.0099 | 0.8613 | 23.0762 | 0.2340 | -84.2156    |
| MF0024 | Stroke              | Weighted mode             | 21 | 0.9975 | 0.9563 | 1.0405 | 0.9080 | -0.0018 | 0.0099 | 0.8613 | 23.0762 | 0.2340 | -84.2156    |
| MF0025 | CardioEmbolicStroke | MR Egger                  | 15 | 1.0680 | 0.7547 | 1.5113 | 0.7164 | 0.0126  | 0.0356 | 0.7287 | 9.8150  | 0.7090 | -28854.6518 |
| MF0025 | CardioEmbolicStroke | Weighted median           | 15 | 1.1272 | 0.8961 | 1.4178 | 0.3065 | 0.0126  | 0.0356 | 0.7287 | 9.8150  | 0.7090 | -28854.6518 |
| MF0025 | CardioEmbolicStroke | Inverse variance weighted | 15 | 1.1293 | 0.9638 | 1.3234 | 0.1327 | 0.0126  | 0.0356 | 0.7287 | 9.8150  | 0.7090 | -28854.6518 |
| MF0025 | CardioEmbolicStroke | Simple mode               | 15 | 1.2965 | 0.9090 | 1.8491 | 0.1737 | 0.0126  | 0.0356 | 0.7287 | 9.8150  | 0.7090 | -28854.6518 |
| MF0025 | CardioEmbolicStroke | Weighted mode             | 15 | 1.1814 | 0.9033 | 1.5449 | 0.2436 | 0.0126  | 0.0356 | 0.7287 | 9.8150  | 0.7090 | -28854.6518 |

|        |                     |                           |    |        |        |          |        |         |        |        |         |        |           |
|--------|---------------------|---------------------------|----|--------|--------|----------|--------|---------|--------|--------|---------|--------|-----------|
| MF0025 | IschemicStroke      | MR Egger                  | 25 | 0.9781 | 0.9317 | 1.0269   | 0.3818 | -0.0015 | 0.0063 | 0.8166 | 23.7049 | 0.4203 | -65.0845  |
| MF0025 | IschemicStroke      | Weighted median           | 25 | 0.9860 | 0.9473 | 1.0262   | 0.4895 | -0.0015 | 0.0063 | 0.8166 | 23.7049 | 0.4203 | -65.0845  |
| MF0025 | IschemicStroke      | Inverse variance weighted | 25 | 0.9735 | 0.9471 | 1.0006   | 0.0548 | -0.0015 | 0.0063 | 0.8166 | 23.7049 | 0.4203 | -65.0845  |
| MF0025 | IschemicStroke      | Simple mode               | 25 | 0.9621 | 0.8959 | 1.0331   | 0.2975 | -0.0015 | 0.0063 | 0.8166 | 23.7049 | 0.4203 | -65.0845  |
| MF0025 | IschemicStroke      | Weighted mode             | 25 | 0.9955 | 0.9426 | 1.0514   | 0.8730 | -0.0015 | 0.0063 | 0.8166 | 23.7049 | 0.4203 | -65.0845  |
| MF0025 | LargeArteryStroke   | MR Egger                  | 18 | 1.1135 | 0.8990 | 1.3790   | 0.3394 | -0.0203 | 0.0238 | 0.4075 | 12.9741 | 0.6746 | -141.7421 |
| MF0025 | LargeArteryStroke   | Weighted median           | 18 | 1.0717 | 0.9149 | 1.2553   | 0.3911 | -0.0203 | 0.0238 | 0.4075 | 12.9741 | 0.6746 | -141.7421 |
| MF0025 | LargeArteryStroke   | Inverse variance weighted | 18 | 1.0274 | 0.9234 | 1.1431   | 0.6197 | -0.0203 | 0.0238 | 0.4075 | 12.9741 | 0.6746 | -141.7421 |
| MF0025 | LargeArteryStroke   | Simple mode               | 18 | 1.2056 | 0.9435 | 1.5406   | 0.1532 | -0.0203 | 0.0238 | 0.4075 | 12.9741 | 0.6746 | -141.7421 |
| MF0025 | LargeArteryStroke   | Weighted mode             | 18 | 1.1208 | 0.9436 | 1.3314   | 0.2114 | -0.0203 | 0.0238 | 0.4075 | 12.9741 | 0.6746 | -141.7421 |
| MF0025 | SmallVesselStroke   | MR Egger                  | 19 | 0.9880 | 0.8896 | 1.0972   | 0.8238 | -0.0087 | 0.0123 | 0.4885 | 14.8595 | 0.6056 | -114.9579 |
| MF0025 | SmallVesselStroke   | Weighted median           | 19 | 0.9808 | 0.9035 | 1.0647   | 0.6438 | -0.0087 | 0.0123 | 0.4885 | 14.8595 | 0.6056 | -114.9579 |
| MF0025 | SmallVesselStroke   | Inverse variance weighted | 19 | 0.9569 | 0.9045 | 1.0123   | 0.1250 | -0.0087 | 0.0123 | 0.4885 | 14.8595 | 0.6056 | -114.9579 |
| MF0025 | SmallVesselStroke   | Simple mode               | 19 | 0.9915 | 0.8464 | 1.1614   | 0.9165 | -0.0087 | 0.0123 | 0.4885 | 14.8595 | 0.6056 | -114.9579 |
| MF0025 | SmallVesselStroke   | Weighted mode             | 19 | 1.0024 | 0.9003 | 1.1160   | 0.9659 | -0.0087 | 0.0123 | 0.4885 | 14.8595 | 0.6056 | -114.9579 |
| MF0025 | Stroke              | MR Egger                  | 22 | 0.9899 | 0.9333 | 1.0500   | 0.7399 | -0.0009 | 0.0065 | 0.8852 | 19.1430 | 0.5126 | -211.9953 |
| MF0025 | Stroke              | Weighted median           | 22 | 1.0087 | 0.9682 | 1.0508   | 0.6800 | -0.0009 | 0.0065 | 0.8852 | 19.1430 | 0.5126 | -211.9953 |
| MF0025 | Stroke              | Inverse variance weighted | 22 | 0.9861 | 0.9588 | 1.0142   | 0.3289 | -0.0009 | 0.0065 | 0.8852 | 19.1430 | 0.5126 | -211.9953 |
| MF0025 | Stroke              | Simple mode               | 22 | 0.9865 | 0.9172 | 1.0611   | 0.7183 | -0.0009 | 0.0065 | 0.8852 | 19.1430 | 0.5126 | -211.9953 |
| MF0025 | Stroke              | Weighted mode             | 22 | 1.0182 | 0.9665 | 1.0726   | 0.5048 | -0.0009 | 0.0065 | 0.8852 | 19.1430 | 0.5126 | -211.9953 |
| MF0026 | CardioEmbolicStroke | MR Egger                  | 13 | #####  | 0.2117 | 550.8121 | 0.2606 | -0.0753 | 0.0645 | 0.2675 | 7.8453  | 0.7971 | 2.4975    |
| MF0026 | CardioEmbolicStroke | Weighted median           | 13 | 1.1477 | 0.2837 | 4.6435   | 0.8468 | -0.0753 | 0.0645 | 0.2675 | 7.8453  | 0.7971 | 2.4975    |
| MF0026 | CardioEmbolicStroke | Inverse variance weighted | 13 | 1.1288 | 0.3958 | 3.2190   | 0.8207 | -0.0753 | 0.0645 | 0.2675 | 7.8453  | 0.7971 | 2.4975    |
| MF0026 | CardioEmbolicStroke | Simple mode               | 13 | 3.3215 | 0.3041 | 36.2768  | 0.3445 | -0.0753 | 0.0645 | 0.2675 | 7.8453  | 0.7971 | 2.4975    |
| MF0026 | CardioEmbolicStroke | Weighted mode             | 13 | 2.7255 | 0.2594 | 28.6375  | 0.4198 | -0.0753 | 0.0645 | 0.2675 | 7.8453  | 0.7971 | 2.4975    |
| MF0026 | IschemicStroke      | MR Egger                  | 19 | 1.1285 | 0.7219 | 1.7642   | 0.6026 | -0.0068 | 0.0090 | 0.4624 | 22.8407 | 0.1545 | 10.8125   |
| MF0026 | IschemicStroke      | Weighted median           | 19 | 1.1319 | 0.8631 | 1.4845   | 0.3704 | -0.0068 | 0.0090 | 0.4624 | 22.8407 | 0.1545 | 10.8125   |
| MF0026 | IschemicStroke      | Inverse variance weighted | 19 | 0.9728 | 0.7804 | 1.2127   | 0.8063 | -0.0068 | 0.0090 | 0.4624 | 22.8407 | 0.1545 | 10.8125   |
| MF0026 | IschemicStroke      | Simple mode               | 19 | 1.1181 | 0.7040 | 1.7756   | 0.6420 | -0.0068 | 0.0090 | 0.4624 | 22.8407 | 0.1545 | 10.8125   |
| MF0026 | IschemicStroke      | Weighted mode             | 19 | 1.2007 | 0.8002 | 1.8019   | 0.3887 | -0.0068 | 0.0090 | 0.4624 | 22.8407 | 0.1545 | 10.8125   |
| MF0026 | LargeArteryStroke   | MR Egger                  | 13 | 0.1441 | 0.0048 | 4.3386   | 0.2886 | 0.0585  | 0.0559 | 0.3178 | 16.2223 | 0.1813 | 2.1818    |
| MF0026 | LargeArteryStroke   | Weighted median           | 13 | 0.8167 | 0.2669 | 2.4988   | 0.7227 | 0.0585  | 0.0559 | 0.3178 | 16.2223 | 0.1813 | 2.1818    |
| MF0026 | LargeArteryStroke   | Inverse variance weighted | 13 | 0.8309 | 0.3339 | 2.0677   | 0.6904 | 0.0585  | 0.0559 | 0.3178 | 16.2223 | 0.1813 | 2.1818    |
| MF0026 | LargeArteryStroke   | Simple mode               | 13 | 2.0109 | 0.2509 | 16.1187  | 0.5231 | 0.0585  | 0.0559 | 0.3178 | 16.2223 | 0.1813 | 2.1818    |
| MF0026 | LargeArteryStroke   | Weighted mode             | 13 | 0.9893 | 0.1532 | 6.3898   | 0.9911 | 0.0585  | 0.0559 | 0.3178 | 16.2223 | 0.1813 | 2.1818    |
| MF0026 | SmallVesselStroke   | MR Egger                  | 16 | 0.9065 | 0.3574 | 2.2995   | 0.8393 | -0.0050 | 0.0172 | 0.7762 | 14.6312 | 0.4038 | 4.3258    |
| MF0026 | SmallVesselStroke   | Weighted median           | 16 | 0.7943 | 0.4627 | 1.3633   | 0.4034 | -0.0050 | 0.0172 | 0.7762 | 14.6312 | 0.4038 | 4.3258    |
| MF0026 | SmallVesselStroke   | Inverse variance weighted | 16 | 0.8001 | 0.5455 | 1.1735   | 0.2538 | -0.0050 | 0.0172 | 0.7762 | 14.6312 | 0.4038 | 4.3258    |
| MF0026 | SmallVesselStroke   | Simple mode               | 16 | 0.7159 | 0.2636 | 1.9446   | 0.5221 | -0.0050 | 0.0172 | 0.7762 | 14.6312 | 0.4038 | 4.3258    |
| MF0026 | SmallVesselStroke   | Weighted mode             | 16 | 0.7384 | 0.3182 | 1.7136   | 0.4910 | -0.0050 | 0.0172 | 0.7762 | 14.6312 | 0.4038 | 4.3258    |
| MF0026 | Stroke              | MR Egger                  | 18 | 1.0364 | 0.6610 | 1.6251   | 0.8781 | -0.0017 | 0.0085 | 0.8479 | 19.7527 | 0.2316 | 12.8365   |
| MF0026 | Stroke              | Weighted median           | 18 | 1.0564 | 0.8245 | 1.3535   | 0.6646 | -0.0017 | 0.0085 | 0.8479 | 19.7527 | 0.2316 | 12.8365   |
| MF0026 | Stroke              | Inverse variance weighted | 18 | 0.9956 | 0.8218 | 1.2060   | 0.9638 | -0.0017 | 0.0085 | 0.8479 | 19.7527 | 0.2316 | 12.8365   |
| MF0026 | Stroke              | Simple mode               | 18 | 1.0568 | 0.6778 | 1.6477   | 0.8103 | -0.0017 | 0.0085 | 0.8479 | 19.7527 | 0.2316 | 12.8365   |
| MF0026 | Stroke              | Weighted mode             | 18 | 1.0864 | 0.7311 | 1.6143   | 0.6869 | -0.0017 | 0.0085 | 0.8479 | 19.7527 | 0.2316 | 12.8365   |
| MF0027 | CardioEmbolicStroke | MR Egger                  | 10 | 0.9291 | 0.3662 | 2.3571   | 0.8807 | 0.0014  | 0.1057 | 0.9897 | 10.7957 | 0.2135 | 107.5903  |
| MF0027 | CardioEmbolicStroke | Weighted median           | 10 | 1.0454 | 0.8176 | 1.3366   | 0.7234 | 0.0014  | 0.1057 | 0.9897 | 10.7957 | 0.2135 | 107.5903  |
| MF0027 | CardioEmbolicStroke | Inverse variance weighted | 10 | 0.9348 | 0.7692 | 1.1362   | 0.4984 | 0.0014  | 0.1057 | 0.9897 | 10.7957 | 0.2135 | 107.5903  |
| MF0027 | CardioEmbolicStroke | Simple mode               | 10 | 1.1567 | 0.7604 | 1.7596   | 0.5135 | 0.0014  | 0.1057 | 0.9897 | 10.7957 | 0.2135 | 107.5903  |
| MF0027 | CardioEmbolicStroke | Weighted mode             | 10 | 1.1476 | 0.7906 | 1.6659   | 0.4874 | 0.0014  | 0.1057 | 0.9897 | 10.7957 | 0.2135 | 107.5903  |
| MF0027 | IschemicStroke      | MR Egger                  | 15 | 0.9908 | 0.9248 | 1.0615   | 0.7972 | 0.0023  | 0.0108 | 0.8316 | 22.3350 | 0.0504 | -57.2538  |
| MF0027 | IschemicStroke      | Weighted median           | 15 | 0.9942 | 0.9527 | 1.0374   | 0.7881 | 0.0023  | 0.0108 | 0.8316 | 22.3350 | 0.0504 | -57.2538  |
| MF0027 | IschemicStroke      | Inverse variance weighted | 15 | 0.9972 | 0.9616 | 1.0341   | 0.8787 | 0.0023  | 0.0108 | 0.8316 | 22.3350 | 0.0504 | -57.2538  |

|        |                     |                           |    |        |        |        |        |         |        |        |         |        |           |
|--------|---------------------|---------------------------|----|--------|--------|--------|--------|---------|--------|--------|---------|--------|-----------|
| MF0027 | IschemicStroke      | Simple mode               | 15 | 0.9669 | 0.8894 | 1.0512 | 0.4430 | 0.0023  | 0.0108 | 0.8316 | 22.3350 | 0.0504 | -57.2538  |
| MF0027 | IschemicStroke      | Weighted mode             | 15 | 1.0540 | 0.9946 | 1.1169 | 0.0971 | 0.0023  | 0.0108 | 0.8316 | 22.3350 | 0.0504 | -57.2538  |
| MF0027 | LargeArteryStroke   | MR Egger                  | 13 | 1.1505 | 0.8517 | 1.5542 | 0.3805 | -0.0497 | 0.0391 | 0.2306 | 8.4566  | 0.7485 | -271.9168 |
| MF0027 | LargeArteryStroke   | Weighted median           | 13 | 0.9487 | 0.8107 | 1.1101 | 0.5111 | -0.0497 | 0.0391 | 0.2306 | 8.4566  | 0.7485 | -271.9168 |
| MF0027 | LargeArteryStroke   | Inverse variance weighted | 13 | 0.9605 | 0.8580 | 1.0751 | 0.4831 | -0.0497 | 0.0391 | 0.2306 | 8.4566  | 0.7485 | -271.9168 |
| MF0027 | LargeArteryStroke   | Simple mode               | 13 | 0.9310 | 0.7163 | 1.2100 | 0.6026 | -0.0497 | 0.0391 | 0.2306 | 8.4566  | 0.7485 | -271.9168 |
| MF0027 | LargeArteryStroke   | Weighted mode             | 13 | 0.9273 | 0.6990 | 1.2301 | 0.6100 | -0.0497 | 0.0391 | 0.2306 | 8.4566  | 0.7485 | -271.9168 |
| MF0027 | SmallVesselStroke   | MR Egger                  | 14 | 0.9855 | 0.8687 | 1.1181 | 0.8246 | 0.0004  | 0.0177 | 0.9827 | 11.6896 | 0.4709 | -77.4159  |
| MF0027 | SmallVesselStroke   | Weighted median           | 14 | 0.9979 | 0.9204 | 1.0819 | 0.9591 | 0.0004  | 0.0177 | 0.9827 | 11.6896 | 0.4709 | -77.4159  |
| MF0027 | SmallVesselStroke   | Inverse variance weighted | 14 | 0.9868 | 0.9311 | 1.0458 | 0.6531 | 0.0004  | 0.0177 | 0.9827 | 11.6896 | 0.4709 | -77.4159  |
| MF0027 | SmallVesselStroke   | Simple mode               | 14 | 1.0301 | 0.8834 | 1.2013 | 0.7113 | 0.0004  | 0.0177 | 0.9827 | 11.6896 | 0.4709 | -77.4159  |
| MF0027 | SmallVesselStroke   | Weighted mode             | 14 | 1.0420 | 0.8852 | 1.2267 | 0.6290 | 0.0004  | 0.0177 | 0.9827 | 11.6896 | 0.4709 | -77.4159  |
| MF0027 | Stroke              | MR Egger                  | 14 | 0.9428 | 0.8636 | 1.0294 | 0.2136 | 0.0164  | 0.0114 | 0.1764 | 17.2751 | 0.1870 | -985.2583 |
| MF0027 | Stroke              | Weighted median           | 14 | 0.9997 | 0.9582 | 1.0432 | 0.9907 | 0.0164  | 0.0114 | 0.1764 | 17.2751 | 0.1870 | -985.2583 |
| MF0027 | Stroke              | Inverse variance weighted | 14 | 1.0010 | 0.9680 | 1.0352 | 0.9522 | 0.0164  | 0.0114 | 0.1764 | 17.2751 | 0.1870 | -985.2583 |
| MF0027 | Stroke              | Simple mode               | 14 | 0.9571 | 0.8773 | 1.0443 | 0.3423 | 0.0164  | 0.0114 | 0.1764 | 17.2751 | 0.1870 | -985.2583 |
| MF0027 | Stroke              | Weighted mode             | 14 | 0.9613 | 0.8904 | 1.0378 | 0.3309 | 0.0164  | 0.0114 | 0.1764 | 17.2751 | 0.1870 | -985.2583 |
| MF0028 | CardioEmbolicStroke | MR Egger                  | 14 | 0.2801 | 0.0610 | 1.2864 | 0.1277 | 0.0376  | 0.0423 | 0.3911 | 9.3176  | 0.6756 | 1.5023    |
| MF0028 | CardioEmbolicStroke | Weighted median           | 14 | 0.5658 | 0.2246 | 1.4250 | 0.2269 | 0.0376  | 0.0423 | 0.3911 | 9.3176  | 0.6756 | 1.5023    |
| MF0028 | CardioEmbolicStroke | Inverse variance weighted | 14 | 0.5232 | 0.2718 | 1.0074 | 0.0526 | 0.0376  | 0.0423 | 0.3911 | 9.3176  | 0.6756 | 1.5023    |
| MF0028 | CardioEmbolicStroke | Simple mode               | 14 | 0.6879 | 0.1670 | 2.8343 | 0.6133 | 0.0376  | 0.0423 | 0.3911 | 9.3176  | 0.6756 | 1.5023    |
| MF0028 | CardioEmbolicStroke | Weighted mode             | 14 | 0.5695 | 0.1834 | 1.7684 | 0.3479 | 0.0376  | 0.0423 | 0.3911 | 9.3176  | 0.6756 | 1.5023    |
| MF0028 | IschemicStroke      | MR Egger                  | 28 | 1.0541 | 0.8614 | 1.2898 | 0.6133 | 0.0010  | 0.0071 | 0.8841 | 26.6033 | 0.4304 | 62.9226   |
| MF0028 | IschemicStroke      | Weighted median           | 28 | 1.0680 | 0.9105 | 1.2527 | 0.4190 | 0.0010  | 0.0071 | 0.8841 | 26.6033 | 0.4304 | 62.9226   |
| MF0028 | IschemicStroke      | Inverse variance weighted | 28 | 1.0675 | 0.9565 | 1.1914 | 0.2436 | 0.0010  | 0.0071 | 0.8841 | 26.6033 | 0.4304 | 62.9226   |
| MF0028 | IschemicStroke      | Simple mode               | 28 | 1.0994 | 0.8344 | 1.4487 | 0.5063 | 0.0010  | 0.0071 | 0.8841 | 26.6033 | 0.4304 | 62.9226   |
| MF0028 | IschemicStroke      | Weighted mode             | 28 | 1.0767 | 0.8706 | 1.3318 | 0.5012 | 0.0010  | 0.0071 | 0.8841 | 26.6033 | 0.4304 | 62.9226   |
| MF0028 | LargeArteryStroke   | MR Egger                  | 21 | 0.8909 | 0.4242 | 1.8711 | 0.7635 | 0.0141  | 0.0246 | 0.5721 | 12.9005 | 0.8436 | 8.1239    |
| MF0028 | LargeArteryStroke   | Weighted median           | 21 | 1.2290 | 0.7176 | 2.1050 | 0.4525 | 0.0141  | 0.0246 | 0.5721 | 12.9005 | 0.8436 | 8.1239    |
| MF0028 | LargeArteryStroke   | Inverse variance weighted | 21 | 1.0709 | 0.7205 | 1.5918 | 0.7349 | 0.0141  | 0.0246 | 0.5721 | 12.9005 | 0.8436 | 8.1239    |
| MF0028 | LargeArteryStroke   | Simple mode               | 21 | 1.0901 | 0.4292 | 2.7684 | 0.8579 | 0.0141  | 0.0246 | 0.5721 | 12.9005 | 0.8436 | 8.1239    |
| MF0028 | LargeArteryStroke   | Weighted mode             | 21 | 1.2356 | 0.5092 | 2.9984 | 0.6450 | 0.0141  | 0.0246 | 0.5721 | 12.9005 | 0.8436 | 8.1239    |
| MF0028 | SmallVesselStroke   | MR Egger                  | 21 | 1.2041 | 0.7538 | 1.9234 | 0.4466 | -0.0087 | 0.0154 | 0.5782 | 23.5261 | 0.2150 | 6.6001    |
| MF0028 | SmallVesselStroke   | Weighted median           | 21 | 0.9814 | 0.7031 | 1.3698 | 0.9119 | -0.0087 | 0.0154 | 0.5782 | 23.5261 | 0.2150 | 6.6001    |
| MF0028 | SmallVesselStroke   | Inverse variance weighted | 21 | 1.0736 | 0.8415 | 1.3697 | 0.5678 | -0.0087 | 0.0154 | 0.5782 | 23.5261 | 0.2150 | 6.6001    |
| MF0028 | SmallVesselStroke   | Simple mode               | 21 | 0.8638 | 0.4964 | 1.5031 | 0.6101 | -0.0087 | 0.0154 | 0.5782 | 23.5261 | 0.2150 | 6.6001    |
| MF0028 | SmallVesselStroke   | Weighted mode             | 21 | 0.9475 | 0.5933 | 1.5132 | 0.8238 | -0.0087 | 0.0154 | 0.5782 | 23.5261 | 0.2150 | 6.6001    |
| MF0028 | Stroke              | MR Egger                  | 29 | 1.0716 | 0.8384 | 1.3695 | 0.5853 | 0.0014  | 0.0078 | 0.8616 | 36.4972 | 0.1048 | 27.2585   |
| MF0028 | Stroke              | Weighted median           | 29 | 1.0780 | 0.9310 | 1.2482 | 0.3154 | 0.0014  | 0.0078 | 0.8616 | 36.4972 | 0.1048 | 27.2585   |
| MF0028 | Stroke              | Inverse variance weighted | 29 | 1.0925 | 0.9728 | 1.2269 | 0.1352 | 0.0014  | 0.0078 | 0.8616 | 36.4972 | 0.1048 | 27.2585   |
| MF0028 | Stroke              | Simple mode               | 29 | 1.1260 | 0.8476 | 1.4959 | 0.4196 | 0.0014  | 0.0078 | 0.8616 | 36.4972 | 0.1048 | 27.2585   |
| MF0028 | Stroke              | Weighted mode             | 29 | 1.0809 | 0.8490 | 1.3761 | 0.5329 | 0.0014  | 0.0078 | 0.8616 | 36.4972 | 0.1048 | 27.2585   |
| MF0029 | CardioEmbolicStroke | MR Egger                  | 13 | 0.9898 | 0.1683 | 5.8201 | 0.9911 | -0.0242 | 0.0707 | 0.7388 | 5.3656  | 0.9122 | 4.0010    |
| MF0029 | CardioEmbolicStroke | Weighted median           | 13 | 0.7882 | 0.4498 | 1.3811 | 0.4056 | -0.0242 | 0.0707 | 0.7388 | 5.3656  | 0.9122 | 4.0010    |
| MF0029 | CardioEmbolicStroke | Inverse variance weighted | 13 | 0.7332 | 0.4784 | 1.1237 | 0.1542 | -0.0242 | 0.0707 | 0.7388 | 5.3656  | 0.9122 | 4.0010    |
| MF0029 | CardioEmbolicStroke | Simple mode               | 13 | 0.9962 | 0.4045 | 2.4534 | 0.9935 | -0.0242 | 0.0707 | 0.7388 | 5.3656  | 0.9122 | 4.0010    |
| MF0029 | CardioEmbolicStroke | Weighted mode             | 13 | 0.9174 | 0.3787 | 2.2225 | 0.8517 | -0.0242 | 0.0707 | 0.7388 | 5.3656  | 0.9122 | 4.0010    |
| MF0029 | IschemicStroke      | MR Egger                  | 22 | 0.9727 | 0.8513 | 1.1114 | 0.6879 | -0.0004 | 0.0073 | 0.9612 | 21.0758 | 0.3927 | 1482.3526 |
| MF0029 | IschemicStroke      | Weighted median           | 22 | 0.9685 | 0.8779 | 1.0685 | 0.5238 | -0.0004 | 0.0073 | 0.9612 | 21.0758 | 0.3927 | 1482.3526 |
| MF0029 | IschemicStroke      | Inverse variance weighted | 22 | 0.9699 | 0.9054 | 1.0390 | 0.3843 | -0.0004 | 0.0073 | 0.9612 | 21.0758 | 0.3927 | 1482.3526 |
| MF0029 | IschemicStroke      | Simple mode               | 22 | 0.9762 | 0.8236 | 1.1571 | 0.7842 | -0.0004 | 0.0073 | 0.9612 | 21.0758 | 0.3927 | 1482.3526 |
| MF0029 | IschemicStroke      | Weighted mode             | 22 | 0.9543 | 0.8253 | 1.1035 | 0.5349 | -0.0004 | 0.0073 | 0.9612 | 21.0758 | 0.3927 | 1482.3526 |
| MF0029 | LargeArteryStroke   | MR Egger                  | 17 | 1.0837 | 0.6475 | 1.8137 | 0.7639 | -0.0113 | 0.0255 | 0.6646 | 4.5114  | 0.9955 | 96.0928   |

|        |                     |                           |    |        |        |        |        |         |        |        |         |        |           |
|--------|---------------------|---------------------------|----|--------|--------|--------|--------|---------|--------|--------|---------|--------|-----------|
| MF0029 | LargeArteryStroke   | Weighted median           | 17 | 0.9346 | 0.6698 | 1.3041 | 0.6906 | -0.0113 | 0.0255 | 0.6646 | 4.5114  | 0.9955 | 96.0928   |
| MF0029 | LargeArteryStroke   | Inverse variance weighted | 17 | 0.9791 | 0.7616 | 1.2588 | 0.8693 | -0.0113 | 0.0255 | 0.6646 | 4.5114  | 0.9955 | 96.0928   |
| MF0029 | LargeArteryStroke   | Simple mode               | 17 | 1.0362 | 0.6044 | 1.7764 | 0.8987 | -0.0113 | 0.0255 | 0.6646 | 4.5114  | 0.9955 | 96.0928   |
| MF0029 | LargeArteryStroke   | Weighted mode             | 17 | 0.9070 | 0.5465 | 1.5053 | 0.7107 | -0.0113 | 0.0255 | 0.6646 | 4.5114  | 0.9955 | 96.0928   |
| MF0029 | SmallVesselStroke   | MR Egger                  | 19 | 1.0076 | 0.7746 | 1.3107 | 0.9558 | -0.0026 | 0.0137 | 0.8540 | 17.1533 | 0.4440 | 106.8920  |
| MF0029 | SmallVesselStroke   | Weighted median           | 19 | 0.9697 | 0.8116 | 1.1587 | 0.7351 | -0.0026 | 0.0137 | 0.8540 | 17.1533 | 0.4440 | 106.8920  |
| MF0029 | SmallVesselStroke   | Inverse variance weighted | 19 | 0.9860 | 0.8642 | 1.1250 | 0.8340 | -0.0026 | 0.0137 | 0.8540 | 17.1533 | 0.4440 | 106.8920  |
| MF0029 | SmallVesselStroke   | Simple mode               | 19 | 0.8409 | 0.6332 | 1.1167 | 0.2467 | -0.0026 | 0.0137 | 0.8540 | 17.1533 | 0.4440 | 106.8920  |
| MF0029 | SmallVesselStroke   | Weighted mode             | 19 | 1.0237 | 0.7957 | 1.3170 | 0.8576 | -0.0026 | 0.0137 | 0.8540 | 17.1533 | 0.4440 | 106.8920  |
| MF0029 | Stroke              | MR Egger                  | 20 | 0.9262 | 0.8043 | 1.0666 | 0.3013 | 0.0045  | 0.0070 | 0.5268 | 16.7609 | 0.5396 | 360.6169  |
| MF0029 | Stroke              | Weighted median           | 20 | 0.9426 | 0.8586 | 1.0348 | 0.2143 | 0.0045  | 0.0070 | 0.5268 | 16.7609 | 0.5396 | 360.6169  |
| MF0029 | Stroke              | Inverse variance weighted | 20 | 0.9652 | 0.9040 | 1.0305 | 0.2884 | 0.0045  | 0.0070 | 0.5268 | 16.7609 | 0.5396 | 360.6169  |
| MF0029 | Stroke              | Simple mode               | 20 | 0.9083 | 0.7428 | 1.1108 | 0.3608 | 0.0045  | 0.0070 | 0.5268 | 16.7609 | 0.5396 | 360.6169  |
| MF0029 | Stroke              | Weighted mode             | 20 | 0.9067 | 0.7675 | 1.0711 | 0.2636 | 0.0045  | 0.0070 | 0.5268 | 16.7609 | 0.5396 | 360.6169  |
| MF0030 | CardioEmbolicStroke | MR Egger                  | 8  | 0.9926 | 0.1172 | 8.4041 | 0.9948 | 0.0178  | 0.1362 | 0.9001 | 8.9149  | 0.1784 | 7.1795    |
| MF0030 | CardioEmbolicStroke | Weighted median           | 8  | 1.2458 | 0.7883 | 1.9689 | 0.3465 | 0.0178  | 0.1362 | 0.9001 | 8.9149  | 0.1784 | 7.1795    |
| MF0030 | CardioEmbolicStroke | Inverse variance weighted | 8  | 1.1421 | 0.7955 | 1.6399 | 0.4714 | 0.0178  | 0.1362 | 0.9001 | 8.9149  | 0.1784 | 7.1795    |
| MF0030 | CardioEmbolicStroke | Simple mode               | 8  | 1.3918 | 0.6360 | 3.0455 | 0.4353 | 0.0178  | 0.1362 | 0.9001 | 8.9149  | 0.1784 | 7.1795    |
| MF0030 | CardioEmbolicStroke | Weighted mode             | 8  | 1.3370 | 0.6564 | 2.7233 | 0.4500 | 0.0178  | 0.1362 | 0.9001 | 8.9149  | 0.1784 | 7.1795    |
| MF0030 | IschemicStroke      | MR Egger                  | 12 | 1.0418 | 0.8829 | 1.2293 | 0.6383 | -0.0038 | 0.0121 | 0.7585 | 5.4562  | 0.8587 | 1100.6000 |
| MF0030 | IschemicStroke      | Weighted median           | 12 | 1.0042 | 0.9232 | 1.0923 | 0.9226 | -0.0038 | 0.0121 | 0.7585 | 5.4562  | 0.8587 | 1100.6000 |
| MF0030 | IschemicStroke      | Inverse variance weighted | 12 | 1.0164 | 0.9548 | 1.0818 | 0.6107 | -0.0038 | 0.0121 | 0.7585 | 5.4562  | 0.8587 | 1100.6000 |
| MF0030 | IschemicStroke      | Simple mode               | 12 | 1.0142 | 0.9000 | 1.1429 | 0.8213 | -0.0038 | 0.0121 | 0.7585 | 5.4562  | 0.8587 | 1100.6000 |
| MF0030 | IschemicStroke      | Weighted mode             | 12 | 1.0116 | 0.9001 | 1.1369 | 0.8496 | -0.0038 | 0.0121 | 0.7585 | 5.4562  | 0.8587 | 1100.6000 |
| MF0030 | LargeArteryStroke   | MR Egger                  | 9  | 1.3015 | 0.4732 | 3.5798 | 0.6254 | -0.0211 | 0.0668 | 0.7616 | 5.8893  | 0.5527 | 19.1414   |
| MF0030 | LargeArteryStroke   | Weighted median           | 9  | 1.1453 | 0.8356 | 1.5698 | 0.3991 | -0.0211 | 0.0668 | 0.7616 | 5.8893  | 0.5527 | 19.1414   |
| MF0030 | LargeArteryStroke   | Inverse variance weighted | 9  | 1.1106 | 0.8838 | 1.3956 | 0.3682 | -0.0211 | 0.0668 | 0.7616 | 5.8893  | 0.5527 | 19.1414   |
| MF0030 | LargeArteryStroke   | Simple mode               | 9  | 1.4016 | 0.8226 | 2.3883 | 0.2495 | -0.0211 | 0.0668 | 0.7616 | 5.8893  | 0.5527 | 19.1414   |
| MF0030 | LargeArteryStroke   | Weighted mode             | 9  | 1.3917 | 0.8331 | 2.3251 | 0.2424 | -0.0211 | 0.0668 | 0.7616 | 5.8893  | 0.5527 | 19.1414   |
| MF0030 | SmallVesselStroke   | MR Egger                  | 10 | 0.9225 | 0.5521 | 1.5413 | 0.7658 | 0.0148  | 0.0343 | 0.6770 | 5.9548  | 0.6523 | 43.8963   |
| MF0030 | SmallVesselStroke   | Weighted median           | 10 | 1.0714 | 0.9031 | 1.2711 | 0.4289 | 0.0148  | 0.0343 | 0.6770 | 5.9548  | 0.6523 | 43.8963   |
| MF0030 | SmallVesselStroke   | Inverse variance weighted | 10 | 1.0295 | 0.9091 | 1.1659 | 0.6466 | 0.0148  | 0.0343 | 0.6770 | 5.9548  | 0.6523 | 43.8963   |
| MF0030 | SmallVesselStroke   | Simple mode               | 10 | 1.1009 | 0.8633 | 1.4039 | 0.4583 | 0.0148  | 0.0343 | 0.6770 | 5.9548  | 0.6523 | 43.8963   |
| MF0030 | SmallVesselStroke   | Weighted mode             | 10 | 1.1084 | 0.8806 | 1.3950 | 0.4034 | 0.0148  | 0.0343 | 0.6770 | 5.9548  | 0.6523 | 43.8963   |
| MF0030 | Stroke              | MR Egger                  | 12 | 0.9584 | 0.8315 | 1.1048 | 0.5712 | 0.0054  | 0.0105 | 0.6143 | 8.6438  | 0.5662 | 1735.6130 |
| MF0030 | Stroke              | Weighted median           | 12 | 0.9906 | 0.9216 | 1.0647 | 0.7973 | 0.0054  | 0.0105 | 0.6143 | 8.6438  | 0.5662 | 1735.6130 |
| MF0030 | Stroke              | Inverse variance weighted | 12 | 0.9926 | 0.9412 | 1.0467 | 0.7830 | 0.0054  | 0.0105 | 0.6143 | 8.6438  | 0.5662 | 1735.6130 |
| MF0030 | Stroke              | Simple mode               | 12 | 1.0713 | 0.9446 | 1.2149 | 0.3066 | 0.0054  | 0.0105 | 0.6143 | 8.6438  | 0.5662 | 1735.6130 |
| MF0030 | Stroke              | Weighted mode             | 12 | 0.9569 | 0.8526 | 1.0739 | 0.4694 | 0.0054  | 0.0105 | 0.6143 | 8.6438  | 0.5662 | 1735.6130 |
| MF0031 | CardioEmbolicStroke | MR Egger                  | 10 | 1.2404 | 0.6722 | 2.2889 | 0.5102 | -0.0471 | 0.0634 | 0.4786 | 7.5977  | 0.4737 | 114.0300  |
| MF0031 | CardioEmbolicStroke | Weighted median           | 10 | 1.0851 | 0.8318 | 1.4157 | 0.5470 | -0.0471 | 0.0634 | 0.4786 | 7.5977  | 0.4737 | 114.0300  |
| MF0031 | CardioEmbolicStroke | Inverse variance weighted | 10 | 0.9952 | 0.8188 | 1.2096 | 0.9615 | -0.0471 | 0.0634 | 0.4786 | 7.5977  | 0.4737 | 114.0300  |
| MF0031 | CardioEmbolicStroke | Simple mode               | 10 | 1.1580 | 0.7396 | 1.8130 | 0.5373 | -0.0471 | 0.0634 | 0.4786 | 7.5977  | 0.4737 | 114.0300  |
| MF0031 | CardioEmbolicStroke | Weighted mode             | 10 | 1.1620 | 0.7631 | 1.7693 | 0.5018 | -0.0471 | 0.0634 | 0.4786 | 7.5977  | 0.4737 | 114.0300  |
| MF0031 | IschemicStroke      | MR Egger                  | 19 | 1.0099 | 0.9345 | 1.0913 | 0.8067 | -0.0009 | 0.0097 | 0.9249 | 15.9351 | 0.5284 | -101.0648 |
| MF0031 | IschemicStroke      | Weighted median           | 19 | 1.0165 | 0.9697 | 1.0654 | 0.4965 | -0.0009 | 0.0097 | 0.9249 | 15.9351 | 0.5284 | -101.0648 |
| MF0031 | IschemicStroke      | Inverse variance weighted | 19 | 1.0065 | 0.9714 | 1.0428 | 0.7205 | -0.0009 | 0.0097 | 0.9249 | 15.9351 | 0.5284 | -101.0648 |
| MF0031 | IschemicStroke      | Simple mode               | 19 | 1.0200 | 0.9489 | 1.0965 | 0.5973 | -0.0009 | 0.0097 | 0.9249 | 15.9351 | 0.5284 | -101.0648 |
| MF0031 | IschemicStroke      | Weighted mode             | 19 | 1.0162 | 0.9514 | 1.0854 | 0.6380 | -0.0009 | 0.0097 | 0.9249 | 15.9351 | 0.5284 | -101.0648 |
| MF0031 | LargeArteryStroke   | MR Egger                  | 14 | 1.0600 | 0.7575 | 1.4832 | 0.7397 | -0.0072 | 0.0381 | 0.8541 | 10.5778 | 0.5654 | -341.2957 |
| MF0031 | LargeArteryStroke   | Weighted median           | 14 | 1.1073 | 0.9313 | 1.3165 | 0.2484 | -0.0072 | 0.0381 | 0.8541 | 10.5778 | 0.5654 | -341.2957 |
| MF0031 | LargeArteryStroke   | Inverse variance weighted | 14 | 1.0289 | 0.9046 | 1.1704 | 0.6643 | -0.0072 | 0.0381 | 0.8541 | 10.5778 | 0.5654 | -341.2957 |
| MF0031 | LargeArteryStroke   | Simple mode               | 14 | 1.1279 | 0.8749 | 1.4539 | 0.3700 | -0.0072 | 0.0381 | 0.8541 | 10.5778 | 0.5654 | -341.2957 |

|        |                     |                           |    |        |        |         |        |         |        |        |         |        |           |
|--------|---------------------|---------------------------|----|--------|--------|---------|--------|---------|--------|--------|---------|--------|-----------|
| MF0031 | LargeArteryStroke   | Weighted mode             | 14 | 1.1251 | 0.8803 | 1.4380  | 0.3635 | -0.0072 | 0.0381 | 0.8541 | 10.5778 | 0.5654 | -341.2957 |
| MF0031 | SmallVesselStroke   | MR Egger                  | 14 | 1.0940 | 0.9082 | 1.3178  | 0.3626 | -0.0151 | 0.0212 | 0.4889 | 11.4517 | 0.4907 | -433.6913 |
| MF0031 | SmallVesselStroke   | Weighted median           | 14 | 1.0270 | 0.9334 | 1.1299  | 0.5850 | -0.0151 | 0.0212 | 0.4889 | 11.4517 | 0.4907 | -433.6913 |
| MF0031 | SmallVesselStroke   | Inverse variance weighted | 14 | 1.0277 | 0.9567 | 1.1040  | 0.4550 | -0.0151 | 0.0212 | 0.4889 | 11.4517 | 0.4907 | -433.6913 |
| MF0031 | SmallVesselStroke   | Simple mode               | 14 | 1.0341 | 0.8909 | 1.2004  | 0.6662 | -0.0151 | 0.0212 | 0.4889 | 11.4517 | 0.4907 | -433.6913 |
| MF0031 | SmallVesselStroke   | Weighted mode             | 14 | 1.0458 | 0.9164 | 1.1935  | 0.5180 | -0.0151 | 0.0212 | 0.4889 | 11.4517 | 0.4907 | -433.6913 |
| MF0031 | Stroke              | MR Egger                  | 20 | 1.0095 | 0.9460 | 1.0773  | 0.7787 | -0.0017 | 0.0082 | 0.8413 | 14.0429 | 0.7263 | -112.2205 |
| MF0031 | Stroke              | Weighted median           | 20 | 1.0105 | 0.9710 | 1.0515  | 0.6080 | -0.0017 | 0.0082 | 0.8413 | 14.0429 | 0.7263 | -112.2205 |
| MF0031 | Stroke              | Inverse variance weighted | 20 | 1.0035 | 0.9743 | 1.0336  | 0.8185 | -0.0017 | 0.0082 | 0.8413 | 14.0429 | 0.7263 | -112.2205 |
| MF0031 | Stroke              | Simple mode               | 20 | 1.0214 | 0.9527 | 1.0951  | 0.5582 | -0.0017 | 0.0082 | 0.8413 | 14.0429 | 0.7263 | -112.2205 |
| MF0031 | Stroke              | Weighted mode             | 20 | 1.0244 | 0.9589 | 1.0944  | 0.4834 | -0.0017 | 0.0082 | 0.8413 | 14.0429 | 0.7263 | -112.2205 |
| MF0032 | CardioEmbolicStroke | MR Egger                  | 11 | 1.0631 | 0.6925 | 1.6320  | 0.7861 | 0.0010  | 0.0722 | 0.9892 | 18.4769 | 0.0300 | -28.0752  |
| MF0032 | CardioEmbolicStroke | Weighted median           | 11 | 0.9869 | 0.8363 | 1.1646  | 0.8756 | 0.0010  | 0.0722 | 0.9892 | 18.4769 | 0.0300 | -28.0752  |
| MF0032 | CardioEmbolicStroke | Inverse variance weighted | 11 | 1.0661 | 0.9141 | 1.2433  | 0.4151 | 0.0010  | 0.0722 | 0.9892 | 18.4769 | 0.0300 | -28.0752  |
| MF0032 | CardioEmbolicStroke | Simple mode               | 11 | 0.9447 | 0.7342 | 1.2156  | 0.6677 | 0.0010  | 0.0722 | 0.9892 | 18.4769 | 0.0300 | -28.0752  |
| MF0032 | CardioEmbolicStroke | Weighted mode             | 11 | 0.9473 | 0.7361 | 1.2192  | 0.6832 | 0.0010  | 0.0722 | 0.9892 | 18.4769 | 0.0300 | -28.0752  |
| MF0032 | IschemicStroke      | MR Egger                  | 17 | 1.0160 | 0.9665 | 1.0680  | 0.5424 | -0.0034 | 0.0096 | 0.7262 | 13.4122 | 0.5705 | -100.9875 |
| MF0032 | IschemicStroke      | Weighted median           | 17 | 1.0007 | 0.9703 | 1.0321  | 0.9627 | -0.0034 | 0.0096 | 0.7262 | 13.4122 | 0.5705 | -100.9875 |
| MF0032 | IschemicStroke      | Inverse variance weighted | 17 | 1.0077 | 0.9860 | 1.0300  | 0.4892 | -0.0034 | 0.0096 | 0.7262 | 13.4122 | 0.5705 | -100.9875 |
| MF0032 | IschemicStroke      | Simple mode               | 17 | 0.9899 | 0.9396 | 1.0429  | 0.7085 | -0.0034 | 0.0096 | 0.7262 | 13.4122 | 0.5705 | -100.9875 |
| MF0032 | IschemicStroke      | Weighted mode             | 17 | 1.0003 | 0.9513 | 1.0518  | 0.9916 | -0.0034 | 0.0096 | 0.7262 | 13.4122 | 0.5705 | -100.9875 |
| MF0032 | LargeArteryStroke   | MR Egger                  | 13 | 0.9888 | 0.7705 | 1.2690  | 0.9313 | 0.0097  | 0.0445 | 0.8318 | 18.7261 | 0.0662 | -25.6923  |
| MF0032 | LargeArteryStroke   | Weighted median           | 13 | 1.1093 | 0.9880 | 1.2455  | 0.0791 | 0.0097  | 0.0445 | 0.8318 | 18.7261 | 0.0662 | -25.6923  |
| MF0032 | LargeArteryStroke   | Inverse variance weighted | 13 | 1.0141 | 0.9192 | 1.1189  | 0.7800 | 0.0097  | 0.0445 | 0.8318 | 18.7261 | 0.0662 | -25.6923  |
| MF0032 | LargeArteryStroke   | Simple mode               | 13 | 1.1523 | 0.9145 | 1.4518  | 0.2525 | 0.0097  | 0.0445 | 0.8318 | 18.7261 | 0.0662 | -25.6923  |
| MF0032 | LargeArteryStroke   | Weighted mode             | 13 | 1.1472 | 0.9490 | 1.3868  | 0.1814 | 0.0097  | 0.0445 | 0.8318 | 18.7261 | 0.0662 | -25.6923  |
| MF0032 | SmallVesselStroke   | MR Egger                  | 14 | 1.0096 | 0.9090 | 1.1214  | 0.8608 | -0.0076 | 0.0188 | 0.6921 | 8.2837  | 0.7626 | -108.5080 |
| MF0032 | SmallVesselStroke   | Weighted median           | 14 | 0.9989 | 0.9411 | 1.0603  | 0.9722 | -0.0076 | 0.0188 | 0.6921 | 8.2837  | 0.7626 | -108.5080 |
| MF0032 | SmallVesselStroke   | Inverse variance weighted | 14 | 0.9898 | 0.9481 | 1.0334  | 0.6422 | -0.0076 | 0.0188 | 0.6921 | 8.2837  | 0.7626 | -108.5080 |
| MF0032 | SmallVesselStroke   | Simple mode               | 14 | 0.9882 | 0.8942 | 1.0920  | 0.8188 | -0.0076 | 0.0188 | 0.6921 | 8.2837  | 0.7626 | -108.5080 |
| MF0032 | SmallVesselStroke   | Weighted mode             | 14 | 0.9961 | 0.9151 | 1.0843  | 0.9291 | -0.0076 | 0.0188 | 0.6921 | 8.2837  | 0.7626 | -108.5080 |
| MF0032 | Stroke              | MR Egger                  | 17 | 1.0078 | 0.9655 | 1.0520  | 0.7279 | 0.0012  | 0.0082 | 0.8861 | 14.7541 | 0.4693 | -120.1836 |
| MF0032 | Stroke              | Weighted median           | 17 | 1.0140 | 0.9872 | 1.0416  | 0.3079 | 0.0012  | 0.0082 | 0.8861 | 14.7541 | 0.4693 | -120.1836 |
| MF0032 | Stroke              | Inverse variance weighted | 17 | 1.0107 | 0.9921 | 1.0296  | 0.2612 | 0.0012  | 0.0082 | 0.8861 | 14.7541 | 0.4693 | -120.1836 |
| MF0032 | Stroke              | Simple mode               | 17 | 0.9849 | 0.9394 | 1.0326  | 0.5366 | 0.0012  | 0.0082 | 0.8861 | 14.7541 | 0.4693 | -120.1836 |
| MF0032 | Stroke              | Weighted mode             | 17 | 1.0289 | 0.9810 | 1.0793  | 0.2588 | 0.0012  | 0.0082 | 0.8861 | 14.7541 | 0.4693 | -120.1836 |
| MF0033 | CardioEmbolicStroke | MR Egger                  | 6  | 0.3098 | 0.0024 | 40.0321 | 0.6612 | 0.0630  | 0.0777 | 0.4630 | 4.1271  | 0.3891 | 6.1405    |
| MF0033 | CardioEmbolicStroke | Weighted median           | 6  | 2.2259 | 0.2955 | 16.7643 | 0.4373 | 0.0630  | 0.0777 | 0.4630 | 4.1271  | 0.3891 | 6.1405    |
| MF0033 | CardioEmbolicStroke | Inverse variance weighted | 6  | 2.0578 | 0.4102 | 10.3225 | 0.3805 | 0.0630  | 0.0777 | 0.4630 | 4.1271  | 0.3891 | 6.1405    |
| MF0033 | CardioEmbolicStroke | Simple mode               | 6  | 2.6507 | 0.0746 | 94.1306 | 0.6154 | 0.0630  | 0.0777 | 0.4630 | 4.1271  | 0.3891 | 6.1405    |
| MF0033 | CardioEmbolicStroke | Weighted mode             | 6  | 2.0837 | 0.1702 | 25.5162 | 0.5906 | 0.0630  | 0.0777 | 0.4630 | 4.1271  | 0.3891 | 6.1405    |
| MF0033 | IschemicStroke      | MR Egger                  | 9  | 1.0269 | 0.2279 | 4.6268  | 0.9734 | 0.0025  | 0.0259 | 0.9268 | 18.0625 | 0.0117 | 2.1449    |
| MF0033 | IschemicStroke      | Weighted median           | 9  | 0.8962 | 0.5622 | 1.4287  | 0.6451 | 0.0025  | 0.0259 | 0.9268 | 18.0625 | 0.0117 | 2.1449    |
| MF0033 | IschemicStroke      | Inverse variance weighted | 9  | 1.0997 | 0.6709 | 1.8026  | 0.7063 | 0.0025  | 0.0259 | 0.9268 | 18.0625 | 0.0117 | 2.1449    |
| MF0033 | IschemicStroke      | Simple mode               | 9  | 1.0899 | 0.5281 | 2.2492  | 0.8217 | 0.0025  | 0.0259 | 0.9268 | 18.0625 | 0.0117 | 2.1449    |
| MF0033 | IschemicStroke      | Weighted mode             | 9  | 0.7426 | 0.4372 | 1.2614  | 0.3030 | 0.0025  | 0.0259 | 0.9268 | 18.0625 | 0.0117 | 2.1449    |
| MF0033 | LargeArteryStroke   | MR Egger                  | 9  | 0.5571 | 0.0099 | 31.4295 | 0.7844 | 0.0328  | 0.0694 | 0.6510 | 12.4651 | 0.0863 | 4.8792    |
| MF0033 | LargeArteryStroke   | Weighted median           | 9  | 0.7639 | 0.1675 | 3.4833  | 0.7279 | 0.0328  | 0.0694 | 0.6510 | 12.4651 | 0.0863 | 4.8792    |
| MF0033 | LargeArteryStroke   | Inverse variance weighted | 9  | 1.3836 | 0.3590 | 5.3333  | 0.6372 | 0.0328  | 0.0694 | 0.6510 | 12.4651 | 0.0863 | 4.8792    |
| MF0033 | LargeArteryStroke   | Simple mode               | 9  | 0.8002 | 0.0830 | 7.7105  | 0.8519 | 0.0328  | 0.0694 | 0.6510 | 12.4651 | 0.0863 | 4.8792    |
| MF0033 | LargeArteryStroke   | Weighted mode             | 9  | 0.6840 | 0.1369 | 3.4173  | 0.6559 | 0.0328  | 0.0694 | 0.6510 | 12.4651 | 0.0863 | 4.8792    |
| MF0033 | SmallVesselStroke   | MR Egger                  | 9  | 0.3546 | 0.0146 | 8.5980  | 0.5441 | 0.0333  | 0.0552 | 0.5659 | 25.7068 | 0.0006 | 1.3253    |
| MF0033 | SmallVesselStroke   | Weighted median           | 9  | 0.6220 | 0.2539 | 1.5238  | 0.2990 | 0.0333  | 0.0552 | 0.5659 | 25.7068 | 0.0006 | 1.3253    |

|        |                     |                           |    |        |        |        |        |         |        |        |         |        |           |
|--------|---------------------|---------------------------|----|--------|--------|--------|--------|---------|--------|--------|---------|--------|-----------|
| MF0033 | SmallVesselStroke   | Inverse variance weighted | 9  | 0.8873 | 0.3024 | 2.6031 | 0.8276 | 0.0333  | 0.0552 | 0.5659 | 25.7068 | 0.0006 | 1.3253    |
| MF0033 | SmallVesselStroke   | Simple mode               | 9  | 0.7386 | 0.1851 | 2.9479 | 0.6792 | 0.0333  | 0.0552 | 0.5659 | 25.7068 | 0.0006 | 1.3253    |
| MF0033 | SmallVesselStroke   | Weighted mode             | 9  | 0.4185 | 0.1445 | 1.2124 | 0.1471 | 0.0333  | 0.0552 | 0.5659 | 25.7068 | 0.0006 | 1.3253    |
| MF0033 | Stroke              | MR Egger                  | 10 | 0.9181 | 0.3762 | 2.2408 | 0.8558 | 0.0034  | 0.0158 | 0.8359 | 13.1942 | 0.1053 | 3.7919    |
| MF0033 | Stroke              | Weighted median           | 10 | 0.9101 | 0.6318 | 1.3110 | 0.6130 | 0.0034  | 0.0158 | 0.8359 | 13.1942 | 0.1053 | 3.7919    |
| MF0033 | Stroke              | Inverse variance weighted | 10 | 1.0043 | 0.7240 | 1.3933 | 0.9793 | 0.0034  | 0.0158 | 0.8359 | 13.1942 | 0.1053 | 3.7919    |
| MF0033 | Stroke              | Simple mode               | 10 | 0.9432 | 0.5271 | 1.6879 | 0.8483 | 0.0034  | 0.0158 | 0.8359 | 13.1942 | 0.1053 | 3.7919    |
| MF0033 | Stroke              | Weighted mode             | 10 | 0.7926 | 0.4942 | 1.2713 | 0.3601 | 0.0034  | 0.0158 | 0.8359 | 13.1942 | 0.1053 | 3.7919    |
| MF0034 | CardioEmbolicStroke | MR Egger                  | 14 | 0.8998 | 0.5424 | 1.4926 | 0.6899 | 0.0172  | 0.0381 | 0.6599 | 13.2219 | 0.3531 | 79.4292   |
| MF0034 | CardioEmbolicStroke | Weighted median           | 14 | 0.8750 | 0.6068 | 1.2616 | 0.4744 | 0.0172  | 0.0381 | 0.6599 | 13.2219 | 0.3531 | 79.4292   |
| MF0034 | CardioEmbolicStroke | Inverse variance weighted | 14 | 0.9906 | 0.7509 | 1.3068 | 0.9468 | 0.0172  | 0.0381 | 0.6599 | 13.2219 | 0.3531 | 79.4292   |
| MF0034 | CardioEmbolicStroke | Simple mode               | 14 | 0.8803 | 0.5224 | 1.4834 | 0.6400 | 0.0172  | 0.0381 | 0.6599 | 13.2219 | 0.3531 | 79.4292   |
| MF0034 | CardioEmbolicStroke | Weighted mode             | 14 | 0.8173 | 0.5286 | 1.2637 | 0.3807 | 0.0172  | 0.0381 | 0.6599 | 13.2219 | 0.3531 | 79.4292   |
| MF0034 | IschemicStroke      | MR Egger                  | 74 | 0.9834 | 0.9363 | 1.0328 | 0.5051 | 0.0002  | 0.0064 | 0.9708 | 68.9891 | 0.5788 | -10.3926  |
| MF0034 | IschemicStroke      | Weighted median           | 74 | 0.9768 | 0.9344 | 1.0212 | 0.3007 | 0.0002  | 0.0064 | 0.9708 | 68.9891 | 0.5788 | -10.3926  |
| MF0034 | IschemicStroke      | Inverse variance weighted | 74 | 0.9841 | 0.9585 | 1.0104 | 0.2347 | 0.0002  | 0.0064 | 0.9708 | 68.9891 | 0.5788 | -10.3926  |
| MF0034 | IschemicStroke      | Simple mode               | 74 | 0.9744 | 0.9047 | 1.0494 | 0.4956 | 0.0002  | 0.0064 | 0.9708 | 68.9891 | 0.5788 | -10.3926  |
| MF0034 | IschemicStroke      | Weighted mode             | 74 | 0.9832 | 0.9370 | 1.0316 | 0.4916 | 0.0002  | 0.0064 | 0.9708 | 68.9891 | 0.5788 | -10.3926  |
| MF0034 | LargeArteryStroke   | MR Egger                  | 36 | 0.9715 | 0.7516 | 1.2556 | 0.8262 | 0.0055  | 0.0284 | 0.8487 | 54.6716 | 0.0138 | -2.2789   |
| MF0034 | LargeArteryStroke   | Weighted median           | 36 | 0.9139 | 0.7589 | 1.1006 | 0.3423 | 0.0055  | 0.0284 | 0.8487 | 54.6716 | 0.0138 | -2.2789   |
| MF0034 | LargeArteryStroke   | Inverse variance weighted | 36 | 0.9915 | 0.8548 | 1.1499 | 0.9099 | 0.0055  | 0.0284 | 0.8487 | 54.6716 | 0.0138 | -2.2789   |
| MF0034 | LargeArteryStroke   | Simple mode               | 36 | 1.4709 | 0.9512 | 2.2747 | 0.0915 | 0.0055  | 0.0284 | 0.8487 | 54.6716 | 0.0138 | -2.2789   |
| MF0034 | LargeArteryStroke   | Weighted mode             | 36 | 0.8399 | 0.6291 | 1.1214 | 0.2448 | 0.0055  | 0.0284 | 0.8487 | 54.6716 | 0.0138 | -2.2789   |
| MF0034 | SmallVesselStroke   | MR Egger                  | 45 | 1.0453 | 0.9412 | 1.1609 | 0.4123 | -0.0102 | 0.0122 | 0.4069 | 41.4204 | 0.5399 | -13.2677  |
| MF0034 | SmallVesselStroke   | Weighted median           | 45 | 1.0124 | 0.9225 | 1.1110 | 0.7955 | -0.0102 | 0.0122 | 0.4069 | 41.4204 | 0.5399 | -13.2677  |
| MF0034 | SmallVesselStroke   | Inverse variance weighted | 45 | 1.0076 | 0.9488 | 1.0699 | 0.8054 | -0.0102 | 0.0122 | 0.4069 | 41.4204 | 0.5399 | -13.2677  |
| MF0034 | SmallVesselStroke   | Simple mode               | 45 | 1.0491 | 0.8812 | 1.2489 | 0.5930 | -0.0102 | 0.0122 | 0.4069 | 41.4204 | 0.5399 | -13.2677  |
| MF0034 | SmallVesselStroke   | Weighted mode             | 45 | 1.0215 | 0.8939 | 1.1673 | 0.7560 | -0.0102 | 0.0122 | 0.4069 | 41.4204 | 0.5399 | -13.2677  |
| MF0034 | Stroke              | MR Egger                  | 63 | 0.9747 | 0.9252 | 1.0269 | 0.3393 | 0.0025  | 0.0056 | 0.6523 | 56.1256 | 0.6528 | -28.0540  |
| MF0034 | Stroke              | Weighted median           | 63 | 0.9930 | 0.9487 | 1.0395 | 0.7641 | 0.0025  | 0.0056 | 0.6523 | 56.1256 | 0.6528 | -28.0540  |
| MF0034 | Stroke              | Inverse variance weighted | 63 | 0.9846 | 0.9568 | 1.0132 | 0.2871 | 0.0025  | 0.0056 | 0.6523 | 56.1256 | 0.6528 | -28.0540  |
| MF0034 | Stroke              | Simple mode               | 63 | 1.0090 | 0.9163 | 1.1111 | 0.8560 | 0.0025  | 0.0056 | 0.6523 | 56.1256 | 0.6528 | -28.0540  |
| MF0034 | Stroke              | Weighted mode             | 63 | 0.9792 | 0.9282 | 1.0330 | 0.4442 | 0.0025  | 0.0056 | 0.6523 | 56.1256 | 0.6528 | -28.0540  |
| MF0035 | CardioEmbolicStroke | MR Egger                  | 12 | 1.0009 | 0.7387 | 1.3562 | 0.9953 | 0.0195  | 0.0336 | 0.5751 | 8.0501  | 0.6239 | 4197.0334 |
| MF0035 | CardioEmbolicStroke | Weighted median           | 12 | 0.9554 | 0.7423 | 1.2299 | 0.7235 | 0.0195  | 0.0336 | 0.5751 | 8.0501  | 0.6239 | 4197.0334 |
| MF0035 | CardioEmbolicStroke | Inverse variance weighted | 12 | 1.0740 | 0.8897 | 1.2966 | 0.4573 | 0.0195  | 0.0336 | 0.5751 | 8.0501  | 0.6239 | 4197.0334 |
| MF0035 | CardioEmbolicStroke | Simple mode               | 12 | 0.9906 | 0.6411 | 1.5304 | 0.9667 | 0.0195  | 0.0336 | 0.5751 | 8.0501  | 0.6239 | 4197.0334 |
| MF0035 | CardioEmbolicStroke | Weighted mode             | 12 | 0.9687 | 0.7482 | 1.2542 | 0.8138 | 0.0195  | 0.0336 | 0.5751 | 8.0501  | 0.6239 | 4197.0334 |
| MF0035 | IschemicStroke      | MR Egger                  | 23 | 0.9807 | 0.9230 | 1.0421 | 0.5367 | -0.0029 | 0.0075 | 0.6997 | 10.7998 | 0.9665 | -181.7692 |
| MF0035 | IschemicStroke      | Weighted median           | 23 | 0.9924 | 0.9402 | 1.0476 | 0.7826 | -0.0029 | 0.0075 | 0.6997 | 10.7998 | 0.9665 | -181.7692 |
| MF0035 | IschemicStroke      | Inverse variance weighted | 23 | 0.9712 | 0.9369 | 1.0069 | 0.1126 | -0.0029 | 0.0075 | 0.6997 | 10.7998 | 0.9665 | -181.7692 |
| MF0035 | IschemicStroke      | Simple mode               | 23 | 0.9941 | 0.9115 | 1.0842 | 0.8946 | -0.0029 | 0.0075 | 0.6997 | 10.7998 | 0.9665 | -181.7692 |
| MF0035 | IschemicStroke      | Weighted mode             | 23 | 0.9961 | 0.9471 | 1.0477 | 0.8819 | -0.0029 | 0.0075 | 0.6997 | 10.7998 | 0.9665 | -181.7692 |
| MF0035 | LargeArteryStroke   | MR Egger                  | 18 | 1.0380 | 0.8359 | 1.2891 | 0.7401 | -0.0005 | 0.0249 | 0.9838 | 6.7131  | 0.9784 | -446.5719 |
| MF0035 | LargeArteryStroke   | Weighted median           | 18 | 1.0481 | 0.8836 | 1.2432 | 0.5899 | -0.0005 | 0.0249 | 0.9838 | 6.7131  | 0.9784 | -446.5719 |
| MF0035 | LargeArteryStroke   | Inverse variance weighted | 18 | 1.0361 | 0.9111 | 1.1782 | 0.5887 | -0.0005 | 0.0249 | 0.9838 | 6.7131  | 0.9784 | -446.5719 |
| MF0035 | LargeArteryStroke   | Simple mode               | 18 | 1.1744 | 0.9019 | 1.5292 | 0.2490 | -0.0005 | 0.0249 | 0.9838 | 6.7131  | 0.9784 | -446.5719 |
| MF0035 | LargeArteryStroke   | Weighted mode             | 18 | 1.0243 | 0.8534 | 1.2293 | 0.7998 | -0.0005 | 0.0249 | 0.9838 | 6.7131  | 0.9784 | -446.5719 |
| MF0035 | SmallVesselStroke   | MR Egger                  | 19 | 0.9838 | 0.8749 | 1.1063 | 0.7884 | 0.0103  | 0.0138 | 0.4665 | 11.9220 | 0.8048 | -460.5026 |
| MF0035 | SmallVesselStroke   | Weighted median           | 19 | 1.0219 | 0.9243 | 1.1299 | 0.6723 | 0.0103  | 0.0138 | 0.4665 | 11.9220 | 0.8048 | -460.5026 |
| MF0035 | SmallVesselStroke   | Inverse variance weighted | 19 | 1.0198 | 0.9515 | 1.0931 | 0.5788 | 0.0103  | 0.0138 | 0.4665 | 11.9220 | 0.8048 | -460.5026 |
| MF0035 | SmallVesselStroke   | Simple mode               | 19 | 0.9939 | 0.8516 | 1.1599 | 0.9387 | 0.0103  | 0.0138 | 0.4665 | 11.9220 | 0.8048 | -460.5026 |
| MF0035 | SmallVesselStroke   | Weighted mode             | 19 | 1.0190 | 0.9279 | 1.1192 | 0.6981 | 0.0103  | 0.0138 | 0.4665 | 11.9220 | 0.8048 | -460.5026 |

|        |                     |                           |    |        |        |         |        |         |        |        |         |        |             |
|--------|---------------------|---------------------------|----|--------|--------|---------|--------|---------|--------|--------|---------|--------|-------------|
| MF0035 | Stroke              | MR Egger                  | 24 | 1.0021 | 0.9456 | 1.0620  | 0.9433 | -0.0044 | 0.0067 | 0.5158 | 17.9181 | 0.7108 | -194.3383   |
| MF0035 | Stroke              | Weighted median           | 24 | 0.9936 | 0.9438 | 1.0460  | 0.8067 | -0.0044 | 0.0067 | 0.5158 | 17.9181 | 0.7108 | -194.3383   |
| MF0035 | Stroke              | Inverse variance weighted | 24 | 0.9862 | 0.9538 | 1.0198  | 0.4167 | -0.0044 | 0.0067 | 0.5158 | 17.9181 | 0.7108 | -194.3383   |
| MF0035 | Stroke              | Simple mode               | 24 | 1.0516 | 0.9639 | 1.1472  | 0.2695 | -0.0044 | 0.0067 | 0.5158 | 17.9181 | 0.7108 | -194.3383   |
| MF0035 | Stroke              | Weighted mode             | 24 | 1.0043 | 0.9523 | 1.0592  | 0.8753 | -0.0044 | 0.0067 | 0.5158 | 17.9181 | 0.7108 | -194.3383   |
| MF0036 | CardioEmbolicStroke | MR Egger                  | 8  | 1.4552 | 0.1264 | 16.7539 | 0.7736 | -0.0027 | 0.1033 | 0.9800 | 7.7130  | 0.2599 | 1.8972      |
| MF0036 | CardioEmbolicStroke | Weighted median           | 8  | 1.5707 | 0.7522 | 3.2798  | 0.2294 | -0.0027 | 0.1033 | 0.9800 | 7.7130  | 0.2599 | 1.8972      |
| MF0036 | CardioEmbolicStroke | Inverse variance weighted | 8  | 1.4100 | 0.8009 | 2.4823  | 0.2339 | -0.0027 | 0.1033 | 0.9800 | 7.7130  | 0.2599 | 1.8972      |
| MF0036 | CardioEmbolicStroke | Simple mode               | 8  | 1.4726 | 0.5095 | 4.2558  | 0.4979 | -0.0027 | 0.1033 | 0.9800 | 7.7130  | 0.2599 | 1.8972      |
| MF0036 | CardioEmbolicStroke | Weighted mode             | 8  | 1.6292 | 0.6380 | 4.1604  | 0.3415 | -0.0027 | 0.1033 | 0.9800 | 7.7130  | 0.2599 | 1.8972      |
| MF0036 | IschemicStroke      | MR Egger                  | 20 | 0.9748 | 0.8583 | 1.1070  | 0.6982 | 0.0083  | 0.0084 | 0.3361 | 17.2249 | 0.5746 | -11490.4564 |
| MF0036 | IschemicStroke      | Weighted median           | 20 | 1.0238 | 0.9228 | 1.1357  | 0.6576 | 0.0083  | 0.0084 | 0.3361 | 17.2249 | 0.5746 | -11490.4564 |
| MF0036 | IschemicStroke      | Inverse variance weighted | 20 | 1.0273 | 0.9549 | 1.1052  | 0.4703 | 0.0083  | 0.0084 | 0.3361 | 17.2249 | 0.5746 | -11490.4564 |
| MF0036 | IschemicStroke      | Simple mode               | 20 | 1.0202 | 0.8528 | 1.2204  | 0.8292 | 0.0083  | 0.0084 | 0.3361 | 17.2249 | 0.5746 | -11490.4564 |
| MF0036 | IschemicStroke      | Weighted mode             | 20 | 1.0343 | 0.8766 | 1.2204  | 0.6942 | 0.0083  | 0.0084 | 0.3361 | 17.2249 | 0.5746 | -11490.4564 |
| MF0036 | LargeArteryStroke   | MR Egger                  | 13 | 1.1478 | 0.7024 | 1.8755  | 0.5932 | 0.0045  | 0.0291 | 0.8788 | 9.3700  | 0.5878 | 69.1504     |
| MF0036 | LargeArteryStroke   | Weighted median           | 13 | 1.0602 | 0.7330 | 1.5335  | 0.7561 | 0.0045  | 0.0291 | 0.8788 | 9.3700  | 0.5878 | 69.1504     |
| MF0036 | LargeArteryStroke   | Inverse variance weighted | 13 | 1.1857 | 0.9019 | 1.5588  | 0.2224 | 0.0045  | 0.0291 | 0.8788 | 9.3700  | 0.5878 | 69.1504     |
| MF0036 | LargeArteryStroke   | Simple mode               | 13 | 1.2900 | 0.7275 | 2.2875  | 0.4006 | 0.0045  | 0.0291 | 0.8788 | 9.3700  | 0.5878 | 69.1504     |
| MF0036 | LargeArteryStroke   | Weighted mode             | 13 | 1.0600 | 0.6617 | 1.6981  | 0.8127 | 0.0045  | 0.0291 | 0.8788 | 9.3700  | 0.5878 | 69.1504     |
| MF0036 | SmallVesselStroke   | MR Egger                  | 16 | 1.0126 | 0.7814 | 1.3122  | 0.9260 | 0.0014  | 0.0159 | 0.9296 | 5.8985  | 0.9690 | 2009.0105   |
| MF0036 | SmallVesselStroke   | Weighted median           | 16 | 1.0373 | 0.8507 | 1.2649  | 0.7175 | 0.0014  | 0.0159 | 0.9296 | 5.8985  | 0.9690 | 2009.0105   |
| MF0036 | SmallVesselStroke   | Inverse variance weighted | 16 | 1.0226 | 0.8853 | 1.1813  | 0.7610 | 0.0014  | 0.0159 | 0.9296 | 5.8985  | 0.9690 | 2009.0105   |
| MF0036 | SmallVesselStroke   | Simple mode               | 16 | 1.0407 | 0.7635 | 1.4185  | 0.8041 | 0.0014  | 0.0159 | 0.9296 | 5.8985  | 0.9690 | 2009.0105   |
| MF0036 | SmallVesselStroke   | Weighted mode             | 16 | 1.0311 | 0.8040 | 1.3224  | 0.8125 | 0.0014  | 0.0159 | 0.9296 | 5.8985  | 0.9690 | 2009.0105   |
| MF0036 | Stroke              | MR Egger                  | 17 | 0.9007 | 0.7540 | 1.0759  | 0.2668 | 0.0131  | 0.0096 | 0.1949 | 15.2014 | 0.5099 | 244.8736    |
| MF0036 | Stroke              | Weighted median           | 17 | 1.0097 | 0.9051 | 1.1263  | 0.8629 | 0.0131  | 0.0096 | 0.1949 | 15.2014 | 0.5099 | 244.8736    |
| MF0036 | Stroke              | Inverse variance weighted | 17 | 1.0065 | 0.9324 | 1.0865  | 0.8679 | 0.0131  | 0.0096 | 0.1949 | 15.2014 | 0.5099 | 244.8736    |
| MF0036 | Stroke              | Simple mode               | 17 | 1.0352 | 0.8547 | 1.2540  | 0.7279 | 0.0131  | 0.0096 | 0.1949 | 15.2014 | 0.5099 | 244.8736    |
| MF0036 | Stroke              | Weighted mode             | 17 | 1.0749 | 0.8890 | 1.2997  | 0.4667 | 0.0131  | 0.0096 | 0.1949 | 15.2014 | 0.5099 | 244.8736    |
| MF0037 | CardioEmbolicStroke | MR Egger                  | 13 | 0.9280 | 0.5989 | 1.4381  | 0.7445 | -0.0020 | 0.0576 | 0.9723 | 19.0897 | 0.0595 | -247.6051   |
| MF0037 | CardioEmbolicStroke | Weighted median           | 13 | 0.9664 | 0.7508 | 1.2438  | 0.7905 | -0.0020 | 0.0576 | 0.9723 | 19.0897 | 0.0595 | -247.6051   |
| MF0037 | CardioEmbolicStroke | Inverse variance weighted | 13 | 0.9217 | 0.7464 | 1.1382  | 0.4486 | -0.0020 | 0.0576 | 0.9723 | 19.0897 | 0.0595 | -247.6051   |
| MF0037 | CardioEmbolicStroke | Simple mode               | 13 | 1.0825 | 0.7130 | 1.6435  | 0.7163 | -0.0020 | 0.0576 | 0.9723 | 19.0897 | 0.0595 | -247.6051   |
| MF0037 | CardioEmbolicStroke | Weighted mode             | 13 | 1.0125 | 0.7514 | 1.3642  | 0.9365 | -0.0020 | 0.0576 | 0.9723 | 19.0897 | 0.0595 | -247.6051   |
| MF0037 | IschemicStroke      | MR Egger                  | 25 | 0.9556 | 0.8998 | 1.0148  | 0.1521 | 0.0104  | 0.0089 | 0.2587 | 18.9016 | 0.7572 | -48.0796    |
| MF0037 | IschemicStroke      | Weighted median           | 25 | 0.9980 | 0.9543 | 1.0438  | 0.9309 | 0.0104  | 0.0089 | 0.2587 | 18.9016 | 0.7572 | -48.0796    |
| MF0037 | IschemicStroke      | Inverse variance weighted | 25 | 0.9848 | 0.9541 | 1.0166  | 0.3457 | 0.0104  | 0.0089 | 0.2587 | 18.9016 | 0.7572 | -48.0796    |
| MF0037 | IschemicStroke      | Simple mode               | 25 | 1.0061 | 0.9260 | 1.0932  | 0.8863 | 0.0104  | 0.0089 | 0.2587 | 18.9016 | 0.7572 | -48.0796    |
| MF0037 | IschemicStroke      | Weighted mode             | 25 | 1.0061 | 0.9344 | 1.0834  | 0.8726 | 0.0104  | 0.0089 | 0.2587 | 18.9016 | 0.7572 | -48.0796    |
| MF0037 | LargeArteryStroke   | MR Egger                  | 17 | 0.8827 | 0.6939 | 1.1228  | 0.3256 | 0.0377  | 0.0324 | 0.2629 | 14.7661 | 0.5418 | -68.5238    |
| MF0037 | LargeArteryStroke   | Weighted median           | 17 | 1.0483 | 0.8791 | 1.2500  | 0.5997 | 0.0377  | 0.0324 | 0.2629 | 14.7661 | 0.5418 | -68.5238    |
| MF0037 | LargeArteryStroke   | Inverse variance weighted | 17 | 0.9995 | 0.8876 | 1.1254  | 0.9930 | 0.0377  | 0.0324 | 0.2629 | 14.7661 | 0.5418 | -68.5238    |
| MF0037 | LargeArteryStroke   | Simple mode               | 17 | 1.1610 | 0.8482 | 1.5891  | 0.3652 | 0.0377  | 0.0324 | 0.2629 | 14.7661 | 0.5418 | -68.5238    |
| MF0037 | LargeArteryStroke   | Weighted mode             | 17 | 1.1370 | 0.8904 | 1.4519  | 0.3185 | 0.0377  | 0.0324 | 0.2629 | 14.7661 | 0.5418 | -68.5238    |
| MF0037 | SmallVesselStroke   | MR Egger                  | 19 | 0.9968 | 0.8795 | 1.1298  | 0.9610 | 0.0054  | 0.0174 | 0.7593 | 11.1047 | 0.8511 | -87.7436    |
| MF0037 | SmallVesselStroke   | Weighted median           | 19 | 1.0261 | 0.9385 | 1.1218  | 0.5717 | 0.0054  | 0.0174 | 0.7593 | 11.1047 | 0.8511 | -87.7436    |
| MF0037 | SmallVesselStroke   | Inverse variance weighted | 19 | 1.0141 | 0.9518 | 1.0805  | 0.6653 | 0.0054  | 0.0174 | 0.7593 | 11.1047 | 0.8511 | -87.7436    |
| MF0037 | SmallVesselStroke   | Simple mode               | 19 | 1.0695 | 0.9260 | 1.2352  | 0.3726 | 0.0054  | 0.0174 | 0.7593 | 11.1047 | 0.8511 | -87.7436    |
| MF0037 | SmallVesselStroke   | Weighted mode             | 19 | 1.0507 | 0.9274 | 1.1903  | 0.4474 | 0.0054  | 0.0174 | 0.7593 | 11.1047 | 0.8511 | -87.7436    |
| MF0037 | Stroke              | MR Egger                  | 22 | 0.9819 | 0.9244 | 1.0429  | 0.5582 | 0.0037  | 0.0082 | 0.6583 | 15.6683 | 0.7370 | -156.2161   |
| MF0037 | Stroke              | Weighted median           | 22 | 1.0178 | 0.9735 | 1.0641  | 0.4373 | 0.0037  | 0.0082 | 0.6583 | 15.6683 | 0.7370 | -156.2161   |
| MF0037 | Stroke              | Inverse variance weighted | 22 | 0.9937 | 0.9641 | 1.0241  | 0.6794 | 0.0037  | 0.0082 | 0.6583 | 15.6683 | 0.7370 | -156.2161   |

|        |                     |                           |    |        |        |          |        |         |        |        |         |        |             |
|--------|---------------------|---------------------------|----|--------|--------|----------|--------|---------|--------|--------|---------|--------|-------------|
| MF0037 | Stroke              | Simple mode               | 22 | 1.0280 | 0.9507 | 1.1114   | 0.4965 | 0.0037  | 0.0082 | 0.6583 | 15.6683 | 0.7370 | -156.2161   |
| MF0037 | Stroke              | Weighted mode             | 22 | 1.0263 | 0.9487 | 1.1102   | 0.5249 | 0.0037  | 0.0082 | 0.6583 | 15.6683 | 0.7370 | -156.2161   |
| MF0038 | CardioEmbolicStroke | MR Egger                  | 9  | 2.6620 | 0.0128 | 553.8599 | 0.7298 | -0.0209 | 0.0910 | 0.8248 | 2.2939  | 0.9418 | 1.4400      |
| MF0038 | CardioEmbolicStroke | Weighted median           | 9  | 1.4354 | 0.3684 | 5.5929   | 0.6025 | -0.0209 | 0.0910 | 0.8248 | 2.2939  | 0.9418 | 1.4400      |
| MF0038 | CardioEmbolicStroke | Inverse variance weighted | 9  | 1.4412 | 0.5073 | 4.0939   | 0.4927 | -0.0209 | 0.0910 | 0.8248 | 2.2939  | 0.9418 | 1.4400      |
| MF0038 | CardioEmbolicStroke | Simple mode               | 9  | 1.2858 | 0.1688 | 9.7965   | 0.8144 | -0.0209 | 0.0910 | 0.8248 | 2.2939  | 0.9418 | 1.4400      |
| MF0038 | CardioEmbolicStroke | Weighted mode             | 9  | 1.3466 | 0.1984 | 9.1384   | 0.7685 | -0.0209 | 0.0910 | 0.8248 | 2.2939  | 0.9418 | 1.4400      |
| MF0038 | IschemicStroke      | MR Egger                  | 17 | 0.9037 | 0.6605 | 1.2365   | 0.5363 | 0.0023  | 0.0080 | 0.7767 | 21.7117 | 0.1156 | 13.4785     |
| MF0038 | IschemicStroke      | Weighted median           | 17 | 0.9453 | 0.7523 | 1.1877   | 0.6289 | 0.0023  | 0.0080 | 0.7767 | 21.7117 | 0.1156 | 13.4785     |
| MF0038 | IschemicStroke      | Inverse variance weighted | 17 | 0.9378 | 0.7818 | 1.1250   | 0.4891 | 0.0023  | 0.0080 | 0.7767 | 21.7117 | 0.1156 | 13.4785     |
| MF0038 | IschemicStroke      | Simple mode               | 17 | 0.9971 | 0.6528 | 1.5228   | 0.9893 | 0.0023  | 0.0080 | 0.7767 | 21.7117 | 0.1156 | 13.4785     |
| MF0038 | IschemicStroke      | Weighted mode             | 17 | 0.9971 | 0.7019 | 1.4164   | 0.9871 | 0.0023  | 0.0080 | 0.7767 | 21.7117 | 0.1156 | 13.4785     |
| MF0038 | LargeArteryStroke   | MR Egger                  | 12 | 5.9721 | 1.2556 | 28.4053  | 0.0485 | -0.0565 | 0.0338 | 0.1256 | 22.0841 | 0.0237 | 6.2267      |
| MF0038 | LargeArteryStroke   | Weighted median           | 12 | 2.0995 | 0.7595 | 5.8038   | 0.1528 | -0.0565 | 0.0338 | 0.1256 | 22.0841 | 0.0237 | 6.2267      |
| MF0038 | LargeArteryStroke   | Inverse variance weighted | 12 | 1.8971 | 0.8097 | 4.4449   | 0.1405 | -0.0565 | 0.0338 | 0.1256 | 22.0841 | 0.0237 | 6.2267      |
| MF0038 | LargeArteryStroke   | Simple mode               | 12 | 0.5772 | 0.0931 | 3.5782   | 0.5668 | -0.0565 | 0.0338 | 0.1256 | 22.0841 | 0.0237 | 6.2267      |
| MF0038 | LargeArteryStroke   | Weighted mode             | 12 | 2.8070 | 0.6582 | 11.9710  | 0.1906 | -0.0565 | 0.0338 | 0.1256 | 22.0841 | 0.0237 | 6.2267      |
| MF0038 | SmallVesselStroke   | MR Egger                  | 13 | 1.0242 | 0.4329 | 2.4233   | 0.9576 | 0.0019  | 0.0186 | 0.9222 | 17.7480 | 0.0876 | 4.3533      |
| MF0038 | SmallVesselStroke   | Weighted median           | 13 | 1.2636 | 0.7591 | 2.1033   | 0.3682 | 0.0019  | 0.0186 | 0.9222 | 17.7480 | 0.0876 | 4.3533      |
| MF0038 | SmallVesselStroke   | Inverse variance weighted | 13 | 1.0640 | 0.7069 | 1.6016   | 0.7661 | 0.0019  | 0.0186 | 0.9222 | 17.7480 | 0.0876 | 4.3533      |
| MF0038 | SmallVesselStroke   | Simple mode               | 13 | 1.4633 | 0.6367 | 3.3631   | 0.3875 | 0.0019  | 0.0186 | 0.9222 | 17.7480 | 0.0876 | 4.3533      |
| MF0038 | SmallVesselStroke   | Weighted mode             | 13 | 1.5120 | 0.6621 | 3.4528   | 0.3458 | 0.0019  | 0.0186 | 0.9222 | 17.7480 | 0.0876 | 4.3533      |
| MF0038 | Stroke              | MR Egger                  | 15 | 0.9292 | 0.6537 | 1.3208   | 0.6890 | -0.0004 | 0.0078 | 0.9585 | 17.9488 | 0.1595 | 16.7510     |
| MF0038 | Stroke              | Weighted median           | 15 | 0.8410 | 0.6726 | 1.0516   | 0.1287 | -0.0004 | 0.0078 | 0.9585 | 17.9488 | 0.1595 | 16.7510     |
| MF0038 | Stroke              | Inverse variance weighted | 15 | 0.9216 | 0.7746 | 1.0965   | 0.3572 | -0.0004 | 0.0078 | 0.9585 | 17.9488 | 0.1595 | 16.7510     |
| MF0038 | Stroke              | Simple mode               | 15 | 0.8332 | 0.5868 | 1.1829   | 0.3247 | -0.0004 | 0.0078 | 0.9585 | 17.9488 | 0.1595 | 16.7510     |
| MF0038 | Stroke              | Weighted mode             | 15 | 0.8419 | 0.6056 | 1.1705   | 0.3234 | -0.0004 | 0.0078 | 0.9585 | 17.9488 | 0.1595 | 16.7510     |
| MF0039 | CardioEmbolicStroke | MR Egger                  | 6  | 0.8786 | 0.3384 | 2.2807   | 0.8034 | 0.0251  | 0.1024 | 0.8182 | 1.1742  | 0.8823 | 95.9305     |
| MF0039 | CardioEmbolicStroke | Weighted median           | 6  | 1.0030 | 0.7491 | 1.3429   | 0.9842 | 0.0251  | 0.1024 | 0.8182 | 1.1742  | 0.8823 | 95.9305     |
| MF0039 | CardioEmbolicStroke | Inverse variance weighted | 6  | 0.9863 | 0.7757 | 1.2540   | 0.9101 | 0.0251  | 0.1024 | 0.8182 | 1.1742  | 0.8823 | 95.9305     |
| MF0039 | CardioEmbolicStroke | Simple mode               | 6  | 0.9900 | 0.6784 | 1.4447   | 0.9604 | 0.0251  | 0.1024 | 0.8182 | 1.1742  | 0.8823 | 95.9305     |
| MF0039 | CardioEmbolicStroke | Weighted mode             | 6  | 0.9769 | 0.6765 | 1.4108   | 0.9057 | 0.0251  | 0.1024 | 0.8182 | 1.1742  | 0.8823 | 95.9305     |
| MF0039 | IschemicStroke      | MR Egger                  | 12 | 0.9531 | 0.8640 | 1.0514   | 0.3600 | 0.0101  | 0.0130 | 0.4534 | 6.0059  | 0.8148 | -507.2765   |
| MF0039 | IschemicStroke      | Weighted median           | 12 | 0.9879 | 0.9326 | 1.0464   | 0.6774 | 0.0101  | 0.0130 | 0.4534 | 6.0059  | 0.8148 | -507.2765   |
| MF0039 | IschemicStroke      | Inverse variance weighted | 12 | 0.9874 | 0.9468 | 1.0297   | 0.5523 | 0.0101  | 0.0130 | 0.4534 | 6.0059  | 0.8148 | -507.2765   |
| MF0039 | IschemicStroke      | Simple mode               | 12 | 1.0380 | 0.9478 | 1.1368   | 0.4388 | 0.0101  | 0.0130 | 0.4534 | 6.0059  | 0.8148 | -507.2765   |
| MF0039 | IschemicStroke      | Weighted mode             | 12 | 0.9884 | 0.9109 | 1.0726   | 0.7850 | 0.0101  | 0.0130 | 0.4534 | 6.0059  | 0.8148 | -507.2765   |
| MF0039 | LargeArteryStroke   | MR Egger                  | 8  | 1.2602 | 0.8503 | 1.8676   | 0.2931 | -0.0522 | 0.0475 | 0.3138 | 5.3991  | 0.6114 | 71935.0055  |
| MF0039 | LargeArteryStroke   | Weighted median           | 8  | 0.9907 | 0.8074 | 1.2156   | 0.9287 | -0.0522 | 0.0475 | 0.3138 | 5.3991  | 0.6114 | 71935.0055  |
| MF0039 | LargeArteryStroke   | Inverse variance weighted | 8  | 1.0291 | 0.8804 | 1.2029   | 0.7187 | -0.0522 | 0.0475 | 0.3138 | 5.3991  | 0.6114 | 71935.0055  |
| MF0039 | LargeArteryStroke   | Simple mode               | 8  | 0.9748 | 0.7227 | 1.3150   | 0.8722 | -0.0522 | 0.0475 | 0.3138 | 5.3991  | 0.6114 | 71935.0055  |
| MF0039 | LargeArteryStroke   | Weighted mode             | 8  | 0.9774 | 0.7177 | 1.3311   | 0.8888 | -0.0522 | 0.0475 | 0.3138 | 5.3991  | 0.6114 | 71935.0055  |
| MF0039 | SmallVesselStroke   | MR Egger                  | 8  | 1.0490 | 0.8341 | 1.3192   | 0.6968 | -0.0225 | 0.0277 | 0.4481 | 6.6367  | 0.3558 | 110064.4480 |
| MF0039 | SmallVesselStroke   | Weighted median           | 8  | 1.0031 | 0.8926 | 1.1272   | 0.9590 | -0.0225 | 0.0277 | 0.4481 | 6.6367  | 0.3558 | 110064.4480 |
| MF0039 | SmallVesselStroke   | Inverse variance weighted | 8  | 0.9614 | 0.8803 | 1.0499   | 0.3807 | -0.0225 | 0.0277 | 0.4481 | 6.6367  | 0.3558 | 110064.4480 |
| MF0039 | SmallVesselStroke   | Simple mode               | 8  | 1.0255 | 0.8669 | 1.2131   | 0.7778 | -0.0225 | 0.0277 | 0.4481 | 6.6367  | 0.3558 | 110064.4480 |
| MF0039 | SmallVesselStroke   | Weighted mode             | 8  | 1.0209 | 0.8819 | 1.1818   | 0.7896 | -0.0225 | 0.0277 | 0.4481 | 6.6367  | 0.3558 | 110064.4480 |
| MF0039 | Stroke              | MR Egger                  | 12 | 0.9909 | 0.9084 | 1.0809   | 0.8408 | 0.0009  | 0.0114 | 0.9404 | 5.8261  | 0.8297 | -868.2564   |
| MF0039 | Stroke              | Weighted median           | 12 | 0.9958 | 0.9473 | 1.0468   | 0.8693 | 0.0009  | 0.0114 | 0.9404 | 5.8261  | 0.8297 | -868.2564   |
| MF0039 | Stroke              | Inverse variance weighted | 12 | 0.9940 | 0.9581 | 1.0312   | 0.7465 | 0.0009  | 0.0114 | 0.9404 | 5.8261  | 0.8297 | -868.2564   |
| MF0039 | Stroke              | Simple mode               | 12 | 0.9621 | 0.8862 | 1.0445   | 0.3769 | 0.0009  | 0.0114 | 0.9404 | 5.8261  | 0.8297 | -868.2564   |
| MF0039 | Stroke              | Weighted mode             | 12 | 0.9921 | 0.9229 | 1.0665   | 0.8341 | 0.0009  | 0.0114 | 0.9404 | 5.8261  | 0.8297 | -868.2564   |
| MF0040 | CardioEmbolicStroke | MR Egger                  | 13 | 1.1425 | 0.5757 | 2.2675   | 0.7105 | -0.0114 | 0.0737 | 0.8794 | 18.3706 | 0.0734 | 2141.9111   |

|        |                     |                           |    |        |        |        |        |         |        |        |         |        |              |
|--------|---------------------|---------------------------|----|--------|--------|--------|--------|---------|--------|--------|---------|--------|--------------|
| MF0040 | CardioEmbolicStroke | Weighted median           | 13 | 1.1211 | 0.8837 | 1.4223 | 0.3464 | -0.0114 | 0.0737 | 0.8794 | 18.3706 | 0.0734 | 2141.9111    |
| MF0040 | CardioEmbolicStroke | Inverse variance weighted | 13 | 1.0849 | 0.8875 | 1.3263 | 0.4263 | -0.0114 | 0.0737 | 0.8794 | 18.3706 | 0.0734 | 2141.9111    |
| MF0040 | CardioEmbolicStroke | Simple mode               | 13 | 1.3243 | 0.8588 | 2.0422 | 0.2277 | -0.0114 | 0.0737 | 0.8794 | 18.3706 | 0.0734 | 2141.9111    |
| MF0040 | CardioEmbolicStroke | Weighted mode             | 13 | 1.3243 | 0.8970 | 1.9552 | 0.1830 | -0.0114 | 0.0737 | 0.8794 | 18.3706 | 0.0734 | 2141.9111    |
| MF0040 | IschemicStroke      | MR Egger                  | 20 | 1.0018 | 0.9199 | 1.0910 | 0.9674 | -0.0055 | 0.0102 | 0.5961 | 17.3224 | 0.5011 | -191.6606    |
| MF0040 | IschemicStroke      | Weighted median           | 20 | 0.9957 | 0.9502 | 1.0434 | 0.8562 | -0.0055 | 0.0102 | 0.5961 | 17.3224 | 0.5011 | -191.6606    |
| MF0040 | IschemicStroke      | Inverse variance weighted | 20 | 0.9803 | 0.9487 | 1.0130 | 0.2353 | -0.0055 | 0.0102 | 0.5961 | 17.3224 | 0.5011 | -191.6606    |
| MF0040 | IschemicStroke      | Simple mode               | 20 | 1.0049 | 0.9322 | 1.0833 | 0.9002 | -0.0055 | 0.0102 | 0.5961 | 17.3224 | 0.5011 | -191.6606    |
| MF0040 | IschemicStroke      | Weighted mode             | 20 | 1.0049 | 0.9372 | 1.0775 | 0.8925 | -0.0055 | 0.0102 | 0.5961 | 17.3224 | 0.5011 | -191.6606    |
| MF0040 | LargeArteryStroke   | MR Egger                  | 16 | 1.0442 | 0.7714 | 1.4135 | 0.7837 | -0.0191 | 0.0349 | 0.5928 | 10.4166 | 0.7311 | -133.4559    |
| MF0040 | LargeArteryStroke   | Weighted median           | 16 | 0.9579 | 0.8212 | 1.1174 | 0.5843 | -0.0191 | 0.0349 | 0.5928 | 10.4166 | 0.7311 | -133.4559    |
| MF0040 | LargeArteryStroke   | Inverse variance weighted | 16 | 0.9653 | 0.8632 | 1.0794 | 0.5354 | -0.0191 | 0.0349 | 0.5928 | 10.4166 | 0.7311 | -133.4559    |
| MF0040 | LargeArteryStroke   | Simple mode               | 16 | 1.0549 | 0.8210 | 1.3554 | 0.6818 | -0.0191 | 0.0349 | 0.5928 | 10.4166 | 0.7311 | -133.4559    |
| MF0040 | LargeArteryStroke   | Weighted mode             | 16 | 1.0464 | 0.8192 | 1.3366 | 0.7216 | -0.0191 | 0.0349 | 0.5928 | 10.4166 | 0.7311 | -133.4559    |
| MF0040 | SmallVesselStroke   | MR Egger                  | 17 | 1.0403 | 0.8712 | 1.2422 | 0.6687 | -0.0176 | 0.0207 | 0.4089 | 17.2613 | 0.3035 | -227.1590    |
| MF0040 | SmallVesselStroke   | Weighted median           | 17 | 0.9888 | 0.9078 | 1.0770 | 0.7962 | -0.0176 | 0.0207 | 0.4089 | 17.2613 | 0.3035 | -227.1590    |
| MF0040 | SmallVesselStroke   | Inverse variance weighted | 17 | 0.9686 | 0.9074 | 1.0339 | 0.3376 | -0.0176 | 0.0207 | 0.4089 | 17.2613 | 0.3035 | -227.1590    |
| MF0040 | SmallVesselStroke   | Simple mode               | 17 | 1.0083 | 0.8810 | 1.1540 | 0.9056 | -0.0176 | 0.0207 | 0.4089 | 17.2613 | 0.3035 | -227.1590    |
| MF0040 | SmallVesselStroke   | Weighted mode             | 17 | 1.0083 | 0.8884 | 1.1445 | 0.8995 | -0.0176 | 0.0207 | 0.4089 | 17.2613 | 0.3035 | -227.1590    |
| MF0040 | Stroke              | MR Egger                  | 20 | 1.0238 | 0.9522 | 1.1008 | 0.5334 | -0.0113 | 0.0087 | 0.2121 | 14.4145 | 0.7590 | -360.8605    |
| MF0040 | Stroke              | Weighted median           | 20 | 0.9916 | 0.9542 | 1.0306 | 0.6697 | -0.0113 | 0.0087 | 0.2121 | 14.4145 | 0.7590 | -360.8605    |
| MF0040 | Stroke              | Inverse variance weighted | 20 | 0.9795 | 0.9526 | 1.0073 | 0.1465 | -0.0113 | 0.0087 | 0.2121 | 14.4145 | 0.7590 | -360.8605    |
| MF0040 | Stroke              | Simple mode               | 20 | 0.9992 | 0.9288 | 1.0749 | 0.9826 | -0.0113 | 0.0087 | 0.2121 | 14.4145 | 0.7590 | -360.8605    |
| MF0040 | Stroke              | Weighted mode             | 20 | 1.0020 | 0.9390 | 1.0691 | 0.9531 | -0.0113 | 0.0087 | 0.2121 | 14.4145 | 0.7590 | -360.8605    |
| MF0041 | CardioEmbolicStroke | MR Egger                  | 10 | 1.0765 | 0.3464 | 3.3460 | 0.9017 | 0.0230  | 0.0714 | 0.7560 | 5.1136  | 0.7454 | 7.2959       |
| MF0041 | CardioEmbolicStroke | Weighted median           | 10 | 1.3174 | 0.8402 | 2.0658 | 0.2297 | 0.0230  | 0.0714 | 0.7560 | 5.1136  | 0.7454 | 7.2959       |
| MF0041 | CardioEmbolicStroke | Inverse variance weighted | 10 | 1.2858 | 0.9172 | 1.8027 | 0.1447 | 0.0230  | 0.0714 | 0.7560 | 5.1136  | 0.7454 | 7.2959       |
| MF0041 | CardioEmbolicStroke | Simple mode               | 10 | 1.4801 | 0.7572 | 2.8931 | 0.2811 | 0.0230  | 0.0714 | 0.7560 | 5.1136  | 0.7454 | 7.2959       |
| MF0041 | CardioEmbolicStroke | Weighted mode             | 10 | 1.4242 | 0.7245 | 2.7995 | 0.3319 | 0.0230  | 0.0714 | 0.7560 | 5.1136  | 0.7454 | 7.2959       |
| MF0041 | IschemicStroke      | MR Egger                  | 20 | 1.0008 | 0.8633 | 1.1601 | 0.9916 | 0.0073  | 0.0107 | 0.5046 | 19.6788 | 0.3512 | -125253.3552 |
| MF0041 | IschemicStroke      | Weighted median           | 20 | 1.0026 | 0.9184 | 1.0945 | 0.9542 | 0.0073  | 0.0107 | 0.5046 | 19.6788 | 0.3512 | -125253.3552 |
| MF0041 | IschemicStroke      | Inverse variance weighted | 20 | 1.0482 | 0.9841 | 1.1165 | 0.1440 | 0.0073  | 0.0107 | 0.5046 | 19.6788 | 0.3512 | -125253.3552 |
| MF0041 | IschemicStroke      | Simple mode               | 20 | 0.9723 | 0.8447 | 1.1192 | 0.7001 | 0.0073  | 0.0107 | 0.5046 | 19.6788 | 0.3512 | -125253.3552 |
| MF0041 | IschemicStroke      | Weighted mode             | 20 | 0.9977 | 0.8764 | 1.1358 | 0.9725 | 0.0073  | 0.0107 | 0.5046 | 19.6788 | 0.3512 | -125253.3552 |
| MF0041 | LargeArteryStroke   | MR Egger                  | 13 | 1.2970 | 0.6340 | 2.6535 | 0.4913 | 0.0006  | 0.0475 | 0.9902 | 7.2106  | 0.7818 | 12.3925      |
| MF0041 | LargeArteryStroke   | Weighted median           | 13 | 1.2451 | 0.9200 | 1.6852 | 0.1557 | 0.0006  | 0.0475 | 0.9902 | 7.2106  | 0.7818 | 12.3925      |
| MF0041 | LargeArteryStroke   | Inverse variance weighted | 13 | 1.3026 | 1.0325 | 1.6434 | 0.0257 | 0.0006  | 0.0475 | 0.9902 | 7.2106  | 0.7818 | 12.3925      |
| MF0041 | LargeArteryStroke   | Simple mode               | 13 | 1.2324 | 0.7939 | 1.9131 | 0.3700 | 0.0006  | 0.0475 | 0.9902 | 7.2106  | 0.7818 | 12.3925      |
| MF0041 | LargeArteryStroke   | Weighted mode             | 13 | 1.2425 | 0.8255 | 1.8700 | 0.3185 | 0.0006  | 0.0475 | 0.9902 | 7.2106  | 0.7818 | 12.3925      |
| MF0041 | SmallVesselStroke   | MR Egger                  | 13 | 1.0980 | 0.7370 | 1.6358 | 0.6548 | 0.0068  | 0.0265 | 0.8029 | 7.3811  | 0.7674 | 53.9268      |
| MF0041 | SmallVesselStroke   | Weighted median           | 13 | 1.1730 | 0.9824 | 1.4006 | 0.0778 | 0.0068  | 0.0265 | 0.8029 | 7.3811  | 0.7674 | 53.9268      |
| MF0041 | SmallVesselStroke   | Inverse variance weighted | 13 | 1.1533 | 1.0135 | 1.3125 | 0.0306 | 0.0068  | 0.0265 | 0.8029 | 7.3811  | 0.7674 | 53.9268      |
| MF0041 | SmallVesselStroke   | Simple mode               | 13 | 0.9493 | 0.7165 | 1.2577 | 0.7232 | 0.0068  | 0.0265 | 0.8029 | 7.3811  | 0.7674 | 53.9268      |
| MF0041 | SmallVesselStroke   | Weighted mode             | 13 | 1.2197 | 0.9585 | 1.5520 | 0.1322 | 0.0068  | 0.0265 | 0.8029 | 7.3811  | 0.7674 | 53.9268      |
| MF0041 | Stroke              | MR Egger                  | 18 | 0.9768 | 0.8147 | 1.1713 | 0.8035 | 0.0109  | 0.0121 | 0.3798 | 21.8385 | 0.1485 | 337.4866     |
| MF0041 | Stroke              | Weighted median           | 18 | 1.0245 | 0.9423 | 1.1137 | 0.5709 | 0.0109  | 0.0121 | 0.3798 | 21.8385 | 0.1485 | 337.4866     |
| MF0041 | Stroke              | Inverse variance weighted | 18 | 1.0558 | 0.9879 | 1.1285 | 0.1094 | 0.0109  | 0.0121 | 0.3798 | 21.8385 | 0.1485 | 337.4866     |
| MF0041 | Stroke              | Simple mode               | 18 | 0.9861 | 0.8663 | 1.1225 | 0.8349 | 0.0109  | 0.0121 | 0.3798 | 21.8385 | 0.1485 | 337.4866     |
| MF0041 | Stroke              | Weighted mode             | 18 | 1.0222 | 0.9043 | 1.1553 | 0.7301 | 0.0109  | 0.0121 | 0.3798 | 21.8385 | 0.1485 | 337.4866     |
| MF0043 | CardioEmbolicStroke | MR Egger                  | 7  | 0.5147 | 0.2042 | 1.2973 | 0.2181 | 0.1210  | 0.0670 | 0.1309 | 5.7624  | 0.4503 | 19.1822      |
| MF0043 | CardioEmbolicStroke | Weighted median           | 7  | 0.9057 | 0.5459 | 1.5027 | 0.7015 | 0.1210  | 0.0670 | 0.1309 | 5.7624  | 0.4503 | 19.1822      |
| MF0043 | CardioEmbolicStroke | Inverse variance weighted | 7  | 1.1219 | 0.7727 | 1.6288 | 0.5455 | 0.1210  | 0.0670 | 0.1309 | 5.7624  | 0.4503 | 19.1822      |
| MF0043 | CardioEmbolicStroke | Simple mode               | 7  | 1.0027 | 0.4691 | 2.1435 | 0.9947 | 0.1210  | 0.0670 | 0.1309 | 5.7624  | 0.4503 | 19.1822      |

|        |                     |                           |    |        |        |            |        |         |        |        |         |        |          |
|--------|---------------------|---------------------------|----|--------|--------|------------|--------|---------|--------|--------|---------|--------|----------|
| MF0043 | CardioEmbolicStroke | Weighted mode             | 7  | 0.8978 | 0.4901 | 1.6448     | 0.7391 | 0.1210  | 0.0670 | 0.1309 | 5.7624  | 0.4503 | 19.1822  |
| MF0043 | IschemicStroke      | MR Egger                  | 9  | 0.8155 | 0.6832 | 0.9734     | 0.0585 | 0.0487  | 0.0138 | 0.0097 | 15.1498 | 0.0563 | 254.0934 |
| MF0043 | IschemicStroke      | Weighted median           | 9  | 1.0118 | 0.8986 | 1.1393     | 0.8460 | 0.0487  | 0.0138 | 0.0097 | 15.1498 | 0.0563 | 254.0934 |
| MF0043 | IschemicStroke      | Inverse variance weighted | 9  | 1.0848 | 0.9743 | 1.2079     | 0.1375 | 0.0487  | 0.0138 | 0.0097 | 15.1498 | 0.0563 | 254.0934 |
| MF0043 | IschemicStroke      | Simple mode               | 9  | 1.0070 | 0.7973 | 1.2719     | 0.9548 | 0.0487  | 0.0138 | 0.0097 | 15.1498 | 0.0563 | 254.0934 |
| MF0043 | IschemicStroke      | Weighted mode             | 9  | 0.9688 | 0.8308 | 1.1298     | 0.6970 | 0.0487  | 0.0138 | 0.0097 | 15.1498 | 0.0563 | 254.0934 |
| MF0043 | LargeArteryStroke   | MR Egger                  | 8  | 1.2785 | 0.6139 | 2.6628     | 0.5359 | -0.0053 | 0.0559 | 0.9273 | 8.8958  | 0.1795 | 18.5776  |
| MF0043 | LargeArteryStroke   | Weighted median           | 8  | 1.0873 | 0.7622 | 1.5512     | 0.6442 | -0.0053 | 0.0559 | 0.9273 | 8.8958  | 0.1795 | 18.5776  |
| MF0043 | LargeArteryStroke   | Inverse variance weighted | 8  | 1.2381 | 0.9216 | 1.6635     | 0.1563 | -0.0053 | 0.0559 | 0.9273 | 8.8958  | 0.1795 | 18.5776  |
| MF0043 | LargeArteryStroke   | Simple mode               | 8  | 0.9590 | 0.5469 | 1.6818     | 0.8880 | -0.0053 | 0.0559 | 0.9273 | 8.8958  | 0.1795 | 18.5776  |
| MF0043 | LargeArteryStroke   | Weighted mode             | 8  | 0.9745 | 0.5649 | 1.6813     | 0.9287 | -0.0053 | 0.0559 | 0.9273 | 8.8958  | 0.1795 | 18.5776  |
| MF0043 | SmallVesselStroke   | MR Egger                  | 8  | 0.9059 | 0.6536 | 1.2556     | 0.5747 | 0.0346  | 0.0252 | 0.2194 | 7.7157  | 0.3583 | 69.1954  |
| MF0043 | SmallVesselStroke   | Weighted median           | 8  | 1.0893 | 0.8911 | 1.3316     | 0.4037 | 0.0346  | 0.0252 | 0.2194 | 7.7157  | 0.3583 | 69.1954  |
| MF0043 | SmallVesselStroke   | Inverse variance weighted | 8  | 1.1121 | 0.9564 | 1.2931     | 0.1675 | 0.0346  | 0.0252 | 0.2194 | 7.7157  | 0.3583 | 69.1954  |
| MF0043 | SmallVesselStroke   | Simple mode               | 8  | 1.1507 | 0.8317 | 1.5921     | 0.4248 | 0.0346  | 0.0252 | 0.2194 | 7.7157  | 0.3583 | 69.1954  |
| MF0043 | SmallVesselStroke   | Weighted mode             | 8  | 1.0947 | 0.7984 | 1.5008     | 0.5918 | 0.0346  | 0.0252 | 0.2194 | 7.7157  | 0.3583 | 69.1954  |
| MF0043 | Stroke              | MR Egger                  | 10 | 0.8758 | 0.7372 | 1.0406     | 0.1701 | 0.0331  | 0.0131 | 0.0350 | 17.0917 | 0.0473 | 247.1809 |
| MF0043 | Stroke              | Weighted median           | 10 | 1.0540 | 0.9493 | 1.1702     | 0.3245 | 0.0331  | 0.0131 | 0.0350 | 17.0917 | 0.0473 | 247.1809 |
| MF0043 | Stroke              | Inverse variance weighted | 10 | 1.0713 | 0.9755 | 1.1764     | 0.1495 | 0.0331  | 0.0131 | 0.0350 | 17.0917 | 0.0473 | 247.1809 |
| MF0043 | Stroke              | Simple mode               | 10 | 1.1957 | 0.9893 | 1.4453     | 0.0976 | 0.0331  | 0.0131 | 0.0350 | 17.0917 | 0.0473 | 247.1809 |
| MF0043 | Stroke              | Weighted mode             | 10 | 1.0130 | 0.8594 | 1.1941     | 0.8807 | 0.0331  | 0.0131 | 0.0350 | 17.0917 | 0.0473 | 247.1809 |
| MF0044 | CardioEmbolicStroke | MR Egger                  | 11 | 0.3938 | 0.0002 | 887.9808   | 0.8183 | 0.0327  | 0.1138 | 0.7806 | 7.4259  | 0.5929 | 3.7965   |
| MF0044 | CardioEmbolicStroke | Weighted median           | 11 | 2.0503 | 0.4395 | 9.5648     | 0.3608 | 0.0327  | 0.1138 | 0.7806 | 7.4259  | 0.5929 | 3.7965   |
| MF0044 | CardioEmbolicStroke | Inverse variance weighted | 11 | 1.2034 | 0.3668 | 3.9485     | 0.7600 | 0.0327  | 0.1138 | 0.7806 | 7.4259  | 0.5929 | 3.7965   |
| MF0044 | CardioEmbolicStroke | Simple mode               | 11 | 2.4762 | 0.1973 | 31.0725    | 0.4984 | 0.0327  | 0.1138 | 0.7806 | 7.4259  | 0.5929 | 3.7965   |
| MF0044 | CardioEmbolicStroke | Weighted mode             | 11 | 2.3841 | 0.1870 | 30.3876    | 0.5186 | 0.0327  | 0.1138 | 0.7806 | 7.4259  | 0.5929 | 3.7965   |
| MF0044 | IschemicStroke      | MR Egger                  | 13 | 1.1453 | 0.4169 | 3.1461     | 0.7973 | -0.0081 | 0.0158 | 0.6185 | 19.3090 | 0.0558 | 4.3941   |
| MF0044 | IschemicStroke      | Weighted median           | 13 | 1.0413 | 0.7312 | 1.4829     | 0.8226 | -0.0081 | 0.0158 | 0.6185 | 19.3090 | 0.0558 | 4.3941   |
| MF0044 | IschemicStroke      | Inverse variance weighted | 13 | 0.8921 | 0.6497 | 1.2249     | 0.4801 | -0.0081 | 0.0158 | 0.6185 | 19.3090 | 0.0558 | 4.3941   |
| MF0044 | IschemicStroke      | Simple mode               | 13 | 1.1408 | 0.6764 | 1.9238     | 0.6303 | -0.0081 | 0.0158 | 0.6185 | 19.3090 | 0.0558 | 4.3941   |
| MF0044 | IschemicStroke      | Weighted mode             | 13 | 1.1239 | 0.6684 | 1.8898     | 0.6673 | -0.0081 | 0.0158 | 0.6185 | 19.3090 | 0.0558 | 4.3941   |
| MF0044 | LargeArteryStroke   | MR Egger                  | 11 | #####  | 0.0140 | 15941.9852 | 0.4670 | -0.0587 | 0.1029 | 0.5824 | 13.3047 | 0.1493 | 4.6787   |
| MF0044 | LargeArteryStroke   | Weighted median           | 11 | 3.1196 | 0.8483 | 11.4727    | 0.0868 | -0.0587 | 0.1029 | 0.5824 | 13.3047 | 0.1493 | 4.6787   |
| MF0044 | LargeArteryStroke   | Inverse variance weighted | 11 | 2.0091 | 0.7096 | 5.6884     | 0.1889 | -0.0587 | 0.1029 | 0.5824 | 13.3047 | 0.1493 | 4.6787   |
| MF0044 | LargeArteryStroke   | Simple mode               | 11 | 7.4160 | 0.5349 | 102.8234   | 0.1662 | -0.0587 | 0.1029 | 0.5824 | 13.3047 | 0.1493 | 4.6787   |
| MF0044 | LargeArteryStroke   | Weighted mode             | 11 | 6.2668 | 0.4902 | 80.1198    | 0.1884 | -0.0587 | 0.1029 | 0.5824 | 13.3047 | 0.1493 | 4.6787   |
| MF0044 | SmallVesselStroke   | MR Egger                  | 11 | 0.8989 | 0.0182 | 44.3897    | 0.9585 | -0.0066 | 0.0576 | 0.9116 | 13.5951 | 0.1375 | 1.5332   |
| MF0044 | SmallVesselStroke   | Weighted median           | 11 | 0.7423 | 0.3666 | 1.5033     | 0.4079 | -0.0066 | 0.0576 | 0.9116 | 13.5951 | 0.1375 | 1.5332   |
| MF0044 | SmallVesselStroke   | Inverse variance weighted | 11 | 0.7183 | 0.4039 | 1.2776     | 0.2601 | -0.0066 | 0.0576 | 0.9116 | 13.5951 | 0.1375 | 1.5332   |
| MF0044 | SmallVesselStroke   | Simple mode               | 11 | 0.7718 | 0.2751 | 2.1655     | 0.6333 | -0.0066 | 0.0576 | 0.9116 | 13.5951 | 0.1375 | 1.5332   |
| MF0044 | SmallVesselStroke   | Weighted mode             | 11 | 0.7718 | 0.2905 | 2.0507     | 0.6147 | -0.0066 | 0.0576 | 0.9116 | 13.5951 | 0.1375 | 1.5332   |
| MF0044 | Stroke              | MR Egger                  | 13 | 0.7083 | 0.2225 | 2.2554     | 0.5713 | 0.0071  | 0.0172 | 0.6870 | 13.5558 | 0.2586 | 1.6667   |
| MF0044 | Stroke              | Weighted median           | 13 | 0.9438 | 0.6952 | 1.2813     | 0.7109 | 0.0071  | 0.0172 | 0.6870 | 13.5558 | 0.2586 | 1.6667   |
| MF0044 | Stroke              | Inverse variance weighted | 13 | 0.8996 | 0.7118 | 1.1371     | 0.3762 | 0.0071  | 0.0172 | 0.6870 | 13.5558 | 0.2586 | 1.6667   |
| MF0044 | Stroke              | Simple mode               | 13 | 1.0416 | 0.6307 | 1.7202     | 0.8762 | 0.0071  | 0.0172 | 0.6870 | 13.5558 | 0.2586 | 1.6667   |
| MF0044 | Stroke              | Weighted mode             | 13 | 1.0352 | 0.6446 | 1.6624     | 0.8887 | 0.0071  | 0.0172 | 0.6870 | 13.5558 | 0.2586 | 1.6667   |
| MF0045 | CardioEmbolicStroke | MR Egger                  | 8  | 0.0153 | 0.0002 | 1.5576     | 0.1268 | 0.1843  | 0.1045 | 0.1281 | 6.5394  | 0.4784 | 1.4902   |
| MF0045 | CardioEmbolicStroke | Weighted median           | 8  | 0.5827 | 0.1618 | 2.0989     | 0.4088 | 0.1843  | 0.1045 | 0.1281 | 6.5394  | 0.4784 | 1.4902   |
| MF0045 | CardioEmbolicStroke | Inverse variance weighted | 8  | 0.8931 | 0.3355 | 2.3771     | 0.8209 | 0.1843  | 0.1045 | 0.1281 | 6.5394  | 0.4784 | 1.4902   |
| MF0045 | CardioEmbolicStroke | Simple mode               | 8  | 0.4091 | 0.0501 | 3.3374     | 0.4315 | 0.1843  | 0.1045 | 0.1281 | 6.5394  | 0.4784 | 1.4902   |
| MF0045 | CardioEmbolicStroke | Weighted mode             | 8  | 0.4303 | 0.0780 | 2.3727     | 0.3652 | 0.1843  | 0.1045 | 0.1281 | 6.5394  | 0.4784 | 1.4902   |
| MF0045 | IschemicStroke      | MR Egger                  | 24 | 1.0007 | 0.8127 | 1.2322     | 0.9947 | 0.0007  | 0.0079 | 0.9264 | 17.8406 | 0.7154 | 67.1369  |
| MF0045 | IschemicStroke      | Weighted median           | 24 | 1.0951 | 0.9223 | 1.3002     | 0.2997 | 0.0007  | 0.0079 | 0.9264 | 17.8406 | 0.7154 | 67.1369  |

|        |                     |                           |    |        |        |         |        |         |        |        |         |        |           |
|--------|---------------------|---------------------------|----|--------|--------|---------|--------|---------|--------|--------|---------|--------|-----------|
| MF0045 | IschemicStroke      | Inverse variance weighted | 24 | 1.0088 | 0.8945 | 1.1378  | 0.8860 | 0.0007  | 0.0079 | 0.9264 | 17.8406 | 0.7154 | 67.1369   |
| MF0045 | IschemicStroke      | Simple mode               | 24 | 1.1450 | 0.8562 | 1.5314  | 0.3706 | 0.0007  | 0.0079 | 0.9264 | 17.8406 | 0.7154 | 67.1369   |
| MF0045 | IschemicStroke      | Weighted mode             | 24 | 1.1261 | 0.8914 | 1.4225  | 0.3297 | 0.0007  | 0.0079 | 0.9264 | 17.8406 | 0.7154 | 67.1369   |
| MF0045 | LargeArteryStroke   | MR Egger                  | 11 | 0.6391 | 0.1979 | 2.0638  | 0.4732 | 0.0349  | 0.0331 | 0.3182 | 4.3258  | 0.9315 | 4.0129    |
| MF0045 | LargeArteryStroke   | Weighted median           | 11 | 1.1621 | 0.5460 | 2.4732  | 0.6967 | 0.0349  | 0.0331 | 0.3182 | 4.3258  | 0.9315 | 4.0129    |
| MF0045 | LargeArteryStroke   | Inverse variance weighted | 11 | 1.1087 | 0.6241 | 1.9694  | 0.7250 | 0.0349  | 0.0331 | 0.3182 | 4.3258  | 0.9315 | 4.0129    |
| MF0045 | LargeArteryStroke   | Simple mode               | 11 | 1.6535 | 0.4893 | 5.5878  | 0.4371 | 0.0349  | 0.0331 | 0.3182 | 4.3258  | 0.9315 | 4.0129    |
| MF0045 | LargeArteryStroke   | Weighted mode             | 11 | 1.4687 | 0.5137 | 4.1994  | 0.4897 | 0.0349  | 0.0331 | 0.3182 | 4.3258  | 0.9315 | 4.0129    |
| MF0045 | SmallVesselStroke   | MR Egger                  | 12 | 1.7565 | 0.9123 | 3.3820  | 0.1228 | -0.0260 | 0.0187 | 0.1941 | 12.2718 | 0.3436 | 2.4682    |
| MF0045 | SmallVesselStroke   | Weighted median           | 12 | 1.1982 | 0.7530 | 1.9064  | 0.4455 | -0.0260 | 0.0187 | 0.1941 | 12.2718 | 0.3436 | 2.4682    |
| MF0045 | SmallVesselStroke   | Inverse variance weighted | 12 | 1.1689 | 0.8402 | 1.6264  | 0.3542 | -0.0260 | 0.0187 | 0.1941 | 12.2718 | 0.3436 | 2.4682    |
| MF0045 | SmallVesselStroke   | Simple mode               | 12 | 1.1443 | 0.5246 | 2.4959  | 0.7412 | -0.0260 | 0.0187 | 0.1941 | 12.2718 | 0.3436 | 2.4682    |
| MF0045 | SmallVesselStroke   | Weighted mode             | 12 | 1.1522 | 0.5839 | 2.2736  | 0.6907 | -0.0260 | 0.0187 | 0.1941 | 12.2718 | 0.3436 | 2.4682    |
| MF0045 | Stroke              | MR Egger                  | 23 | 0.8455 | 0.6616 | 1.0804  | 0.1940 | 0.0081  | 0.0080 | 0.3234 | 13.0960 | 0.9304 | 30.6136   |
| MF0045 | Stroke              | Weighted median           | 23 | 0.9789 | 0.8356 | 1.1468  | 0.7919 | 0.0081  | 0.0080 | 0.3234 | 13.0960 | 0.9304 | 30.6136   |
| MF0045 | Stroke              | Inverse variance weighted | 23 | 0.9441 | 0.8373 | 1.0645  | 0.3475 | 0.0081  | 0.0080 | 0.3234 | 13.0960 | 0.9304 | 30.6136   |
| MF0045 | Stroke              | Simple mode               | 23 | 0.8507 | 0.6407 | 1.1297  | 0.2759 | 0.0081  | 0.0080 | 0.3234 | 13.0960 | 0.9304 | 30.6136   |
| MF0045 | Stroke              | Weighted mode             | 23 | 0.9730 | 0.7185 | 1.3177  | 0.8612 | 0.0081  | 0.0080 | 0.3234 | 13.0960 | 0.9304 | 30.6136   |
| MF0046 | CardioEmbolicStroke | MR Egger                  | 11 | 0.9708 | 0.3904 | 2.4144  | 0.9506 | -0.0104 | 0.0821 | 0.9018 | 11.6697 | 0.2326 | 36.9319   |
| MF0046 | CardioEmbolicStroke | Weighted median           | 11 | 0.9798 | 0.7162 | 1.3404  | 0.8984 | -0.0104 | 0.0821 | 0.9018 | 11.6697 | 0.2326 | 36.9319   |
| MF0046 | CardioEmbolicStroke | Inverse variance weighted | 11 | 0.9174 | 0.7165 | 1.1747  | 0.4944 | -0.0104 | 0.0821 | 0.9018 | 11.6697 | 0.2326 | 36.9319   |
| MF0046 | CardioEmbolicStroke | Simple mode               | 11 | 1.0073 | 0.5656 | 1.7938  | 0.9808 | -0.0104 | 0.0821 | 0.9018 | 11.6697 | 0.2326 | 36.9319   |
| MF0046 | CardioEmbolicStroke | Weighted mode             | 11 | 1.1565 | 0.6544 | 2.0437  | 0.6276 | -0.0104 | 0.0821 | 0.9018 | 11.6697 | 0.2326 | 36.9319   |
| MF0046 | IschemicStroke      | MR Egger                  | 19 | 0.9479 | 0.8428 | 1.0661  | 0.3846 | 0.0076  | 0.0120 | 0.5326 | 11.3504 | 0.8378 | -677.4932 |
| MF0046 | IschemicStroke      | Weighted median           | 19 | 0.9823 | 0.9236 | 1.0447  | 0.5697 | 0.0076  | 0.0120 | 0.5326 | 11.3504 | 0.8378 | -677.4932 |
| MF0046 | IschemicStroke      | Inverse variance weighted | 19 | 0.9820 | 0.9389 | 1.0270  | 0.4264 | 0.0076  | 0.0120 | 0.5326 | 11.3504 | 0.8378 | -677.4932 |
| MF0046 | IschemicStroke      | Simple mode               | 19 | 0.9718 | 0.8757 | 1.0784  | 0.5968 | 0.0076  | 0.0120 | 0.5326 | 11.3504 | 0.8378 | -677.4932 |
| MF0046 | IschemicStroke      | Weighted mode             | 19 | 0.9773 | 0.8901 | 1.0729  | 0.6350 | 0.0076  | 0.0120 | 0.5326 | 11.3504 | 0.8378 | -677.4932 |
| MF0046 | LargeArteryStroke   | MR Egger                  | 15 | 0.7778 | 0.4918 | 1.2301  | 0.3022 | 0.0500  | 0.0442 | 0.2787 | 11.3678 | 0.6569 | 9516.0045 |
| MF0046 | LargeArteryStroke   | Weighted median           | 15 | 1.0541 | 0.8592 | 1.2931  | 0.6135 | 0.0500  | 0.0442 | 0.2787 | 11.3678 | 0.6569 | 9516.0045 |
| MF0046 | LargeArteryStroke   | Inverse variance weighted | 15 | 0.9973 | 0.8531 | 1.1658  | 0.9729 | 0.0500  | 0.0442 | 0.2787 | 11.3678 | 0.6569 | 9516.0045 |
| MF0046 | LargeArteryStroke   | Simple mode               | 15 | 1.0816 | 0.7620 | 1.5354  | 0.6673 | 0.0500  | 0.0442 | 0.2787 | 11.3678 | 0.6569 | 9516.0045 |
| MF0046 | LargeArteryStroke   | Weighted mode             | 15 | 1.0962 | 0.7946 | 1.5122  | 0.5846 | 0.0500  | 0.0442 | 0.2787 | 11.3678 | 0.6569 | 9516.0045 |
| MF0046 | SmallVesselStroke   | MR Egger                  | 16 | 1.0026 | 0.7768 | 1.2939  | 0.9846 | -0.0032 | 0.0254 | 0.9001 | 18.0195 | 0.2059 | -694.1193 |
| MF0046 | SmallVesselStroke   | Weighted median           | 16 | 0.9719 | 0.8653 | 1.0916  | 0.6308 | -0.0032 | 0.0254 | 0.9001 | 18.0195 | 0.2059 | -694.1193 |
| MF0046 | SmallVesselStroke   | Inverse variance weighted | 16 | 0.9872 | 0.9003 | 1.0825  | 0.7841 | -0.0032 | 0.0254 | 0.9001 | 18.0195 | 0.2059 | -694.1193 |
| MF0046 | SmallVesselStroke   | Simple mode               | 16 | 0.9275 | 0.7313 | 1.1765  | 0.5444 | -0.0032 | 0.0254 | 0.9001 | 18.0195 | 0.2059 | -694.1193 |
| MF0046 | SmallVesselStroke   | Weighted mode             | 16 | 0.9401 | 0.7666 | 1.1529  | 0.5616 | -0.0032 | 0.0254 | 0.9001 | 18.0195 | 0.2059 | -694.1193 |
| MF0046 | Stroke              | MR Egger                  | 19 | 1.0150 | 0.9206 | 1.1190  | 0.7688 | -0.0068 | 0.0101 | 0.5116 | 13.5389 | 0.6994 | -866.9689 |
| MF0046 | Stroke              | Weighted median           | 19 | 0.9798 | 0.9298 | 1.0324  | 0.4433 | -0.0068 | 0.0101 | 0.5116 | 13.5389 | 0.6994 | -866.9689 |
| MF0046 | Stroke              | Inverse variance weighted | 19 | 0.9842 | 0.9481 | 1.0216  | 0.4023 | -0.0068 | 0.0101 | 0.5116 | 13.5389 | 0.6994 | -866.9689 |
| MF0046 | Stroke              | Simple mode               | 19 | 0.9693 | 0.8859 | 1.0605  | 0.5055 | -0.0068 | 0.0101 | 0.5116 | 13.5389 | 0.6994 | -866.9689 |
| MF0046 | Stroke              | Weighted mode             | 19 | 0.9662 | 0.8843 | 1.0556  | 0.4560 | -0.0068 | 0.0101 | 0.5116 | 13.5389 | 0.6994 | -866.9689 |
| MF0047 | CardioEmbolicStroke | MR Egger                  | 6  | 2.1784 | 0.2756 | 17.2185 | 0.5014 | -0.0565 | 0.0600 | 0.3996 | 2.9450  | 0.5671 | 1.0922    |
| MF0047 | CardioEmbolicStroke | Weighted median           | 6  | 0.6671 | 0.1940 | 2.2938  | 0.5206 | -0.0565 | 0.0600 | 0.3996 | 2.9450  | 0.5671 | 1.0922    |
| MF0047 | CardioEmbolicStroke | Inverse variance weighted | 6  | 0.8995 | 0.3508 | 2.3068  | 0.8256 | -0.0565 | 0.0600 | 0.3996 | 2.9450  | 0.5671 | 1.0922    |
| MF0047 | CardioEmbolicStroke | Simple mode               | 6  | 0.4420 | 0.0559 | 3.4923  | 0.4738 | -0.0565 | 0.0600 | 0.3996 | 2.9450  | 0.5671 | 1.0922    |
| MF0047 | CardioEmbolicStroke | Weighted mode             | 6  | 0.4420 | 0.0684 | 2.8576  | 0.4304 | -0.0565 | 0.0600 | 0.3996 | 2.9450  | 0.5671 | 1.0922    |
| MF0047 | IschemicStroke      | MR Egger                  | 12 | 1.0882 | 0.7790 | 1.5200  | 0.6310 | -0.0119 | 0.0118 | 0.3388 | 5.8821  | 0.8811 | 17.5034   |
| MF0047 | IschemicStroke      | Weighted median           | 12 | 0.9000 | 0.7226 | 1.1209  | 0.3468 | -0.0119 | 0.0118 | 0.3388 | 5.8821  | 0.8811 | 17.5034   |
| MF0047 | IschemicStroke      | Inverse variance weighted | 12 | 0.9370 | 0.7960 | 1.1029  | 0.4341 | -0.0119 | 0.0118 | 0.3388 | 5.8821  | 0.8811 | 17.5034   |
| MF0047 | IschemicStroke      | Simple mode               | 12 | 0.8088 | 0.5859 | 1.1165  | 0.2235 | -0.0119 | 0.0118 | 0.3388 | 5.8821  | 0.8811 | 17.5034   |
| MF0047 | IschemicStroke      | Weighted mode             | 12 | 0.8384 | 0.6263 | 1.1222  | 0.2610 | -0.0119 | 0.0118 | 0.3388 | 5.8821  | 0.8811 | 17.5034   |

|        |                     |                           |    |        |        |         |        |         |        |        |         |        |         |
|--------|---------------------|---------------------------|----|--------|--------|---------|--------|---------|--------|--------|---------|--------|---------|
| MF0047 | LargeArteryStroke   | MR Egger                  | 10 | 0.4736 | 0.1498 | 1.4970  | 0.2388 | 0.0501  | 0.0393 | 0.2385 | 7.3449  | 0.6013 | 1.8354  |
| MF0047 | LargeArteryStroke   | Weighted median           | 10 | 0.7212 | 0.3458 | 1.5041  | 0.3834 | 0.0501  | 0.0393 | 0.2385 | 7.3449  | 0.6013 | 1.8354  |
| MF0047 | LargeArteryStroke   | Inverse variance weighted | 10 | 0.9117 | 0.5231 | 1.5891  | 0.7444 | 0.0501  | 0.0393 | 0.2385 | 7.3449  | 0.6013 | 1.8354  |
| MF0047 | LargeArteryStroke   | Simple mode               | 10 | 0.6340 | 0.2056 | 1.9552  | 0.4481 | 0.0501  | 0.0393 | 0.2385 | 7.3449  | 0.6013 | 1.8354  |
| MF0047 | LargeArteryStroke   | Weighted mode             | 10 | 0.6922 | 0.2718 | 1.7627  | 0.4603 | 0.0501  | 0.0393 | 0.2385 | 7.3449  | 0.6013 | 1.8354  |
| MF0047 | SmallVesselStroke   | MR Egger                  | 10 | 1.0918 | 0.5672 | 2.1016  | 0.7992 | -0.0151 | 0.0223 | 0.5177 | 8.2684  | 0.4077 | 7.3524  |
| MF0047 | SmallVesselStroke   | Weighted median           | 10 | 1.0560 | 0.6852 | 1.6275  | 0.8050 | -0.0151 | 0.0223 | 0.5177 | 8.2684  | 0.4077 | 7.3524  |
| MF0047 | SmallVesselStroke   | Inverse variance weighted | 10 | 0.8954 | 0.6572 | 1.2200  | 0.4841 | -0.0151 | 0.0223 | 0.5177 | 8.2684  | 0.4077 | 7.3524  |
| MF0047 | SmallVesselStroke   | Simple mode               | 10 | 1.1399 | 0.5464 | 2.3783  | 0.7351 | -0.0151 | 0.0223 | 0.5177 | 8.2684  | 0.4077 | 7.3524  |
| MF0047 | SmallVesselStroke   | Weighted mode             | 10 | 1.1763 | 0.6743 | 2.0520  | 0.5813 | -0.0151 | 0.0223 | 0.5177 | 8.2684  | 0.4077 | 7.3524  |
| MF0047 | Stroke              | MR Egger                  | 13 | 0.9443 | 0.7012 | 1.2717  | 0.7129 | -0.0036 | 0.0100 | 0.7299 | 5.4517  | 0.9073 | 33.5161 |
| MF0047 | Stroke              | Weighted median           | 13 | 0.9059 | 0.7433 | 1.1041  | 0.3277 | -0.0036 | 0.0100 | 0.7299 | 5.4517  | 0.9073 | 33.5161 |
| MF0047 | Stroke              | Inverse variance weighted | 13 | 0.9007 | 0.7814 | 1.0381  | 0.1488 | -0.0036 | 0.0100 | 0.7299 | 5.4517  | 0.9073 | 33.5161 |
| MF0047 | Stroke              | Simple mode               | 13 | 0.9552 | 0.6992 | 1.3047  | 0.7780 | -0.0036 | 0.0100 | 0.7299 | 5.4517  | 0.9073 | 33.5161 |
| MF0047 | Stroke              | Weighted mode             | 13 | 0.9171 | 0.6954 | 1.2096  | 0.5517 | -0.0036 | 0.0100 | 0.7299 | 5.4517  | 0.9073 | 33.5161 |
| MF0048 | CardioEmbolicStroke | MR Egger                  | 10 | 0.3454 | 0.0749 | 1.5941  | 0.2102 | 0.0456  | 0.0391 | 0.2769 | 4.3585  | 0.8863 | 1.0195  |
| MF0048 | CardioEmbolicStroke | Weighted median           | 10 | 0.4190 | 0.1266 | 1.3867  | 0.1543 | 0.0456  | 0.0391 | 0.2769 | 4.3585  | 0.8863 | 1.0195  |
| MF0048 | CardioEmbolicStroke | Inverse variance weighted | 10 | 0.7285 | 0.3033 | 1.7495  | 0.4785 | 0.0456  | 0.0391 | 0.2769 | 4.3585  | 0.8863 | 1.0195  |
| MF0048 | CardioEmbolicStroke | Simple mode               | 10 | 2.1369 | 0.2577 | 17.7182 | 0.4995 | 0.0456  | 0.0391 | 0.2769 | 4.3585  | 0.8863 | 1.0195  |
| MF0048 | CardioEmbolicStroke | Weighted mode             | 10 | 0.3910 | 0.1116 | 1.3697  | 0.1761 | 0.0456  | 0.0391 | 0.2769 | 4.3585  | 0.8863 | 1.0195  |
| MF0048 | IschemicStroke      | MR Egger                  | 22 | 0.9335 | 0.7251 | 1.2020  | 0.5996 | 0.0056  | 0.0080 | 0.4876 | 12.4376 | 0.9002 | 35.2024 |
| MF0048 | IschemicStroke      | Weighted median           | 22 | 0.8834 | 0.7130 | 1.0947  | 0.2572 | 0.0056  | 0.0080 | 0.4876 | 12.4376 | 0.9002 | 35.2024 |
| MF0048 | IschemicStroke      | Inverse variance weighted | 22 | 1.0050 | 0.8664 | 1.1659  | 0.9470 | 0.0056  | 0.0080 | 0.4876 | 12.4376 | 0.9002 | 35.2024 |
| MF0048 | IschemicStroke      | Simple mode               | 22 | 0.8456 | 0.6133 | 1.1660  | 0.3179 | 0.0056  | 0.0080 | 0.4876 | 12.4376 | 0.9002 | 35.2024 |
| MF0048 | IschemicStroke      | Weighted mode             | 22 | 0.8880 | 0.7091 | 1.1120  | 0.3124 | 0.0056  | 0.0080 | 0.4876 | 12.4376 | 0.9002 | 35.2024 |
| MF0048 | LargeArteryStroke   | MR Egger                  | 18 | 0.9050 | 0.3520 | 2.3269  | 0.8385 | -0.0081 | 0.0273 | 0.7706 | 6.9772  | 0.9737 | 1.3750  |
| MF0048 | LargeArteryStroke   | Weighted median           | 18 | 0.8493 | 0.3821 | 1.8875  | 0.6884 | -0.0081 | 0.0273 | 0.7706 | 6.9772  | 0.9737 | 1.3750  |
| MF0048 | LargeArteryStroke   | Inverse variance weighted | 18 | 0.8049 | 0.4688 | 1.3821  | 0.4315 | -0.0081 | 0.0273 | 0.7706 | 6.9772  | 0.9737 | 1.3750  |
| MF0048 | LargeArteryStroke   | Simple mode               | 18 | 0.9824 | 0.3407 | 2.8328  | 0.9742 | -0.0081 | 0.0273 | 0.7706 | 6.9772  | 0.9737 | 1.3750  |
| MF0048 | LargeArteryStroke   | Weighted mode             | 18 | 0.9019 | 0.4062 | 2.0024  | 0.8027 | -0.0081 | 0.0273 | 0.7706 | 6.9772  | 0.9737 | 1.3750  |
| MF0048 | SmallVesselStroke   | MR Egger                  | 20 | 1.0206 | 0.6384 | 1.6315  | 0.9330 | -0.0015 | 0.0145 | 0.9213 | 15.2566 | 0.6443 | 7.4627  |
| MF0048 | SmallVesselStroke   | Weighted median           | 20 | 0.8884 | 0.5904 | 1.3368  | 0.5703 | -0.0015 | 0.0145 | 0.9213 | 15.2566 | 0.6443 | 7.4627  |
| MF0048 | SmallVesselStroke   | Inverse variance weighted | 20 | 1.0010 | 0.7601 | 1.3183  | 0.9944 | -0.0015 | 0.0145 | 0.9213 | 15.2566 | 0.6443 | 7.4627  |
| MF0048 | SmallVesselStroke   | Simple mode               | 20 | 0.7268 | 0.4114 | 1.2841  | 0.2856 | -0.0015 | 0.0145 | 0.9213 | 15.2566 | 0.6443 | 7.4627  |
| MF0048 | SmallVesselStroke   | Weighted mode             | 20 | 0.8852 | 0.5868 | 1.3351  | 0.5676 | -0.0015 | 0.0145 | 0.9213 | 15.2566 | 0.6443 | 7.4627  |
| MF0048 | Stroke              | MR Egger                  | 21 | 0.8690 | 0.6788 | 1.1126  | 0.2793 | 0.0077  | 0.0072 | 0.2951 | 18.0941 | 0.5812 | 19.6658 |
| MF0048 | Stroke              | Weighted median           | 21 | 0.9106 | 0.7489 | 1.1072  | 0.3478 | 0.0077  | 0.0072 | 0.2951 | 18.0941 | 0.5812 | 19.6658 |
| MF0048 | Stroke              | Inverse variance weighted | 21 | 0.9719 | 0.8451 | 1.1178  | 0.6895 | 0.0077  | 0.0072 | 0.2951 | 18.0941 | 0.5812 | 19.6658 |
| MF0048 | Stroke              | Simple mode               | 21 | 0.9110 | 0.6629 | 1.2521  | 0.5722 | 0.0077  | 0.0072 | 0.2951 | 18.0941 | 0.5812 | 19.6658 |
| MF0048 | Stroke              | Weighted mode             | 21 | 0.9258 | 0.7449 | 1.1507  | 0.4952 | 0.0077  | 0.0072 | 0.2951 | 18.0941 | 0.5812 | 19.6658 |
| MF0049 | CardioEmbolicStroke | MR Egger                  | 7  | 1.9362 | 0.0433 | 86.5218 | 0.7471 | -0.0064 | 0.0713 | 0.9322 | 1.9795  | 0.8520 | 1.1810  |
| MF0049 | CardioEmbolicStroke | Weighted median           | 7  | 1.8340 | 0.3909 | 8.6054  | 0.4419 | -0.0064 | 0.0713 | 0.9322 | 1.9795  | 0.8520 | 1.1810  |
| MF0049 | CardioEmbolicStroke | Inverse variance weighted | 7  | 1.6430 | 0.4829 | 5.5903  | 0.4268 | -0.0064 | 0.0713 | 0.9322 | 1.9795  | 0.8520 | 1.1810  |
| MF0049 | CardioEmbolicStroke | Simple mode               | 7  | 2.0981 | 0.2220 | 19.8319 | 0.5418 | -0.0064 | 0.0713 | 0.9322 | 1.9795  | 0.8520 | 1.1810  |
| MF0049 | CardioEmbolicStroke | Weighted mode             | 7  | 2.4766 | 0.3525 | 17.4018 | 0.3971 | -0.0064 | 0.0713 | 0.9322 | 1.9795  | 0.8520 | 1.1810  |
| MF0049 | IschemicStroke      | MR Egger                  | 14 | 1.0797 | 0.6472 | 1.8013  | 0.7740 | -0.0039 | 0.0134 | 0.7762 | 25.4982 | 0.0126 | 6.9680  |
| MF0049 | IschemicStroke      | Weighted median           | 14 | 0.9407 | 0.6935 | 1.2762  | 0.6946 | -0.0039 | 0.0134 | 0.7762 | 25.4982 | 0.0126 | 6.9680  |
| MF0049 | IschemicStroke      | Inverse variance weighted | 14 | 1.0121 | 0.7812 | 1.3113  | 0.9272 | -0.0039 | 0.0134 | 0.7762 | 25.4982 | 0.0126 | 6.9680  |
| MF0049 | IschemicStroke      | Simple mode               | 14 | 0.8189 | 0.5112 | 1.3119  | 0.4210 | -0.0039 | 0.0134 | 0.7762 | 25.4982 | 0.0126 | 6.9680  |
| MF0049 | IschemicStroke      | Weighted mode             | 14 | 0.8341 | 0.5389 | 1.2910  | 0.4303 | -0.0039 | 0.0134 | 0.7762 | 25.4982 | 0.0126 | 6.9680  |
| MF0049 | LargeArteryStroke   | MR Egger                  | 10 | 6.5631 | 1.5080 | 28.5643 | 0.0365 | -0.0508 | 0.0340 | 0.1739 | 10.9137 | 0.2817 | 5.5177  |
| MF0049 | LargeArteryStroke   | Weighted median           | 10 | 1.7187 | 0.5771 | 5.1181  | 0.3307 | -0.0508 | 0.0340 | 0.1739 | 10.9137 | 0.2817 | 5.5177  |
| MF0049 | LargeArteryStroke   | Inverse variance weighted | 10 | 2.4755 | 1.1444 | 5.3551  | 0.0213 | -0.0508 | 0.0340 | 0.1739 | 10.9137 | 0.2817 | 5.5177  |

|        |                     |                           |    |        |        |          |        |         |        |        |         |        |         |
|--------|---------------------|---------------------------|----|--------|--------|----------|--------|---------|--------|--------|---------|--------|---------|
| MF0049 | LargeArteryStroke   | Simple mode               | 10 | 0.9387 | 0.1213 | 7.2665   | 0.9530 | -0.0508 | 0.0340 | 0.1739 | 10.9137 | 0.2817 | 5.5177  |
| MF0049 | LargeArteryStroke   | Weighted mode             | 10 | 0.7580 | 0.0685 | 8.3911   | 0.8264 | -0.0508 | 0.0340 | 0.1739 | 10.9137 | 0.2817 | 5.5177  |
| MF0049 | SmallVesselStroke   | MR Egger                  | 11 | 0.8430 | 0.2552 | 2.7844   | 0.7857 | 0.0029  | 0.0274 | 0.9184 | 19.1691 | 0.0238 | 3.1274  |
| MF0049 | SmallVesselStroke   | Weighted median           | 11 | 0.8619 | 0.4724 | 1.5726   | 0.6281 | 0.0029  | 0.0274 | 0.9184 | 19.1691 | 0.0238 | 3.1274  |
| MF0049 | SmallVesselStroke   | Inverse variance weighted | 11 | 0.8920 | 0.5193 | 1.5320   | 0.6787 | 0.0029  | 0.0274 | 0.9184 | 19.1691 | 0.0238 | 3.1274  |
| MF0049 | SmallVesselStroke   | Simple mode               | 11 | 0.7519 | 0.2879 | 1.9635   | 0.5733 | 0.0029  | 0.0274 | 0.9184 | 19.1691 | 0.0238 | 3.1274  |
| MF0049 | SmallVesselStroke   | Weighted mode             | 11 | 0.7699 | 0.3732 | 1.5882   | 0.4952 | 0.0029  | 0.0274 | 0.9184 | 19.1691 | 0.0238 | 3.1274  |
| MF0049 | Stroke              | MR Egger                  | 15 | 0.8418 | 0.5240 | 1.3522   | 0.4888 | 0.0062  | 0.0114 | 0.5934 | 23.7676 | 0.0333 | 10.8753 |
| MF0049 | Stroke              | Weighted median           | 15 | 0.8413 | 0.6518 | 1.0858   | 0.1842 | 0.0062  | 0.0114 | 0.5934 | 23.7676 | 0.0333 | 10.8753 |
| MF0049 | Stroke              | Inverse variance weighted | 15 | 0.9449 | 0.7547 | 1.1832   | 0.6216 | 0.0062  | 0.0114 | 0.5934 | 23.7676 | 0.0333 | 10.8753 |
| MF0049 | Stroke              | Simple mode               | 15 | 0.8157 | 0.5223 | 1.2738   | 0.3854 | 0.0062  | 0.0114 | 0.5934 | 23.7676 | 0.0333 | 10.8753 |
| MF0049 | Stroke              | Weighted mode             | 15 | 0.7916 | 0.5639 | 1.1111   | 0.1981 | 0.0062  | 0.0114 | 0.5934 | 23.7676 | 0.0333 | 10.8753 |
| MF0050 | CardioEmbolicStroke | MR Egger                  | 10 | #####  | 0.1826 | 832.4901 | 0.2761 | -0.1007 | 0.1027 | 0.3554 | 13.3334 | 0.1481 | 25.0544 |
| MF0050 | CardioEmbolicStroke | Weighted median           | 10 | 1.0128 | 0.3012 | 3.4056   | 0.9835 | -0.1007 | 0.1027 | 0.3554 | 13.3334 | 0.1481 | 25.0544 |
| MF0050 | CardioEmbolicStroke | Inverse variance weighted | 10 | 1.6126 | 0.5350 | 4.8603   | 0.3959 | -0.1007 | 0.1027 | 0.3554 | 13.3334 | 0.1481 | 25.0544 |
| MF0050 | CardioEmbolicStroke | Simple mode               | 10 | 0.8425 | 0.1404 | 5.0564   | 0.8555 | -0.1007 | 0.1027 | 0.3554 | 13.3334 | 0.1481 | 25.0544 |
| MF0050 | CardioEmbolicStroke | Weighted mode             | 10 | 0.9035 | 0.1719 | 4.7476   | 0.9072 | -0.1007 | 0.1027 | 0.3554 | 13.3334 | 0.1481 | 25.0544 |
| MF0050 | IschemicStroke      | MR Egger                  | 19 | 1.0628 | 0.8689 | 1.3000   | 0.5612 | -0.0104 | 0.0081 | 0.2145 | 20.2783 | 0.3174 | 69.7789 |
| MF0050 | IschemicStroke      | Weighted median           | 19 | 0.9687 | 0.8217 | 1.1419   | 0.7046 | -0.0104 | 0.0081 | 0.2145 | 20.2783 | 0.3174 | 69.7789 |
| MF0050 | IschemicStroke      | Inverse variance weighted | 19 | 0.9573 | 0.8440 | 1.0857   | 0.4966 | -0.0104 | 0.0081 | 0.2145 | 20.2783 | 0.3174 | 69.7789 |
| MF0050 | IschemicStroke      | Simple mode               | 19 | 0.9940 | 0.7883 | 1.2534   | 0.9603 | -0.0104 | 0.0081 | 0.2145 | 20.2783 | 0.3174 | 69.7789 |
| MF0050 | IschemicStroke      | Weighted mode             | 19 | 0.9940 | 0.8190 | 1.2065   | 0.9525 | -0.0104 | 0.0081 | 0.2145 | 20.2783 | 0.3174 | 69.7789 |
| MF0050 | LargeArteryStroke   | MR Egger                  | 14 | 0.7365 | 0.3334 | 1.6273   | 0.4641 | 0.0003  | 0.0276 | 0.9918 | 5.2607  | 0.9487 | 4.7954  |
| MF0050 | LargeArteryStroke   | Weighted median           | 14 | 0.7316 | 0.3945 | 1.3564   | 0.3211 | 0.0003  | 0.0276 | 0.9918 | 5.2607  | 0.9487 | 4.7954  |
| MF0050 | LargeArteryStroke   | Inverse variance weighted | 14 | 0.7391 | 0.4694 | 1.1636   | 0.1916 | 0.0003  | 0.0276 | 0.9918 | 5.2607  | 0.9487 | 4.7954  |
| MF0050 | LargeArteryStroke   | Simple mode               | 14 | 0.7959 | 0.3030 | 2.0905   | 0.6508 | 0.0003  | 0.0276 | 0.9918 | 5.2607  | 0.9487 | 4.7954  |
| MF0050 | LargeArteryStroke   | Weighted mode             | 14 | 0.7049 | 0.3379 | 1.4706   | 0.3683 | 0.0003  | 0.0276 | 0.9918 | 5.2607  | 0.9487 | 4.7954  |
| MF0050 | SmallVesselStroke   | MR Egger                  | 14 | 0.9949 | 0.6033 | 1.6407   | 0.9844 | -0.0180 | 0.0176 | 0.3245 | 17.1704 | 0.1916 | 11.3823 |
| MF0050 | SmallVesselStroke   | Weighted median           | 14 | 0.8245 | 0.5751 | 1.1822   | 0.2939 | -0.0180 | 0.0176 | 0.3245 | 17.1704 | 0.1916 | 11.3823 |
| MF0050 | SmallVesselStroke   | Inverse variance weighted | 14 | 0.8028 | 0.6018 | 1.0708   | 0.1351 | -0.0180 | 0.0176 | 0.3245 | 17.1704 | 0.1916 | 11.3823 |
| MF0050 | SmallVesselStroke   | Simple mode               | 14 | 0.9041 | 0.5550 | 1.4729   | 0.6922 | -0.0180 | 0.0176 | 0.3245 | 17.1704 | 0.1916 | 11.3823 |
| MF0050 | SmallVesselStroke   | Weighted mode             | 14 | 0.8484 | 0.5932 | 1.2132   | 0.3840 | -0.0180 | 0.0176 | 0.3245 | 17.1704 | 0.1916 | 11.3823 |
| MF0050 | Stroke              | MR Egger                  | 18 | 0.9892 | 0.6888 | 1.4205   | 0.9536 | -0.0026 | 0.0113 | 0.8193 | 32.2118 | 0.0094 | 19.0894 |
| MF0050 | Stroke              | Weighted median           | 18 | 0.9591 | 0.7965 | 1.1549   | 0.6596 | -0.0026 | 0.0113 | 0.8193 | 32.2118 | 0.0094 | 19.0894 |
| MF0050 | Stroke              | Inverse variance weighted | 18 | 0.9533 | 0.7971 | 1.1401   | 0.6004 | -0.0026 | 0.0113 | 0.8193 | 32.2118 | 0.0094 | 19.0894 |
| MF0050 | Stroke              | Simple mode               | 18 | 1.0173 | 0.7736 | 1.3377   | 0.9037 | -0.0026 | 0.0113 | 0.8193 | 32.2118 | 0.0094 | 19.0894 |
| MF0050 | Stroke              | Weighted mode             | 18 | 0.9609 | 0.7661 | 1.2051   | 0.7342 | -0.0026 | 0.0113 | 0.8193 | 32.2118 | 0.0094 | 19.0894 |
| MF0051 | CardioEmbolicStroke | MR Egger                  | 7  | 0.0776 | 0.0003 | 18.9152  | 0.4037 | 0.1069  | 0.1120 | 0.3837 | 11.6666 | 0.0698 | 2.6118  |
| MF0051 | CardioEmbolicStroke | Weighted median           | 7  | 0.9522 | 0.2358 | 3.8450   | 0.9452 | 0.1069  | 0.1120 | 0.3837 | 11.6666 | 0.0698 | 2.6118  |
| MF0051 | CardioEmbolicStroke | Inverse variance weighted | 7  | 1.0309 | 0.2541 | 4.1820   | 0.9660 | 0.1069  | 0.1120 | 0.3837 | 11.6666 | 0.0698 | 2.6118  |
| MF0051 | CardioEmbolicStroke | Simple mode               | 7  | 1.0271 | 0.0797 | 13.2327  | 0.9843 | 0.1069  | 0.1120 | 0.3837 | 11.6666 | 0.0698 | 2.6118  |
| MF0051 | CardioEmbolicStroke | Weighted mode             | 7  | 0.7550 | 0.0930 | 6.1274   | 0.8013 | 0.1069  | 0.1120 | 0.3837 | 11.6666 | 0.0698 | 2.6118  |
| MF0051 | IschemicStroke      | MR Egger                  | 11 | 0.8825 | 0.4576 | 1.7018   | 0.7177 | 0.0080  | 0.0159 | 0.6283 | 21.0227 | 0.0126 | 18.8736 |
| MF0051 | IschemicStroke      | Weighted median           | 11 | 0.9341 | 0.7018 | 1.2432   | 0.6400 | 0.0080  | 0.0159 | 0.6283 | 21.0227 | 0.0126 | 18.8736 |
| MF0051 | IschemicStroke      | Inverse variance weighted | 11 | 1.0259 | 0.7757 | 1.3567   | 0.8577 | 0.0080  | 0.0159 | 0.6283 | 21.0227 | 0.0126 | 18.8736 |
| MF0051 | IschemicStroke      | Simple mode               | 11 | 0.8330 | 0.5461 | 1.2705   | 0.4160 | 0.0080  | 0.0159 | 0.6283 | 21.0227 | 0.0126 | 18.8736 |
| MF0051 | IschemicStroke      | Weighted mode             | 11 | 0.8693 | 0.5870 | 1.2874   | 0.5004 | 0.0080  | 0.0159 | 0.6283 | 21.0227 | 0.0126 | 18.8736 |
| MF0051 | LargeArteryStroke   | MR Egger                  | 8  | 1.0604 | 0.1120 | 10.0387  | 0.9609 | 0.0225  | 0.0477 | 0.6532 | 4.2070  | 0.6487 | 2.6636  |
| MF0051 | LargeArteryStroke   | Weighted median           | 8  | 1.6961 | 0.6381 | 4.5084   | 0.2895 | 0.0225  | 0.0477 | 0.6532 | 4.2070  | 0.6487 | 2.6636  |
| MF0051 | LargeArteryStroke   | Inverse variance weighted | 8  | 1.7718 | 0.8624 | 3.6401   | 0.1194 | 0.0225  | 0.0477 | 0.6532 | 4.2070  | 0.6487 | 2.6636  |
| MF0051 | LargeArteryStroke   | Simple mode               | 8  | 3.4348 | 0.7356 | 16.0371  | 0.1605 | 0.0225  | 0.0477 | 0.6532 | 4.2070  | 0.6487 | 2.6636  |
| MF0051 | LargeArteryStroke   | Weighted mode             | 8  | 1.2951 | 0.2929 | 5.7255   | 0.7431 | 0.0225  | 0.0477 | 0.6532 | 4.2070  | 0.6487 | 2.6636  |
| MF0051 | SmallVesselStroke   | MR Egger                  | 8  | 0.8495 | 0.1985 | 3.6359   | 0.8332 | 0.0117  | 0.0309 | 0.7173 | 8.1167  | 0.2297 | 5.7407  |

|        |                     |                           |    |        |        |         |        |         |        |        |         |        |           |
|--------|---------------------|---------------------------|----|--------|--------|---------|--------|---------|--------|--------|---------|--------|-----------|
| MF0051 | SmallVesselStroke   | Weighted median           | 8  | 0.8313 | 0.4818 | 1.4344  | 0.5068 | 0.0117  | 0.0309 | 0.7173 | 8.1167  | 0.2297 | 5.7407    |
| MF0051 | SmallVesselStroke   | Inverse variance weighted | 8  | 1.1093 | 0.7180 | 1.7138  | 0.6402 | 0.0117  | 0.0309 | 0.7173 | 8.1167  | 0.2297 | 5.7407    |
| MF0051 | SmallVesselStroke   | Simple mode               | 8  | 0.7924 | 0.3018 | 2.0800  | 0.6509 | 0.0117  | 0.0309 | 0.7173 | 8.1167  | 0.2297 | 5.7407    |
| MF0051 | SmallVesselStroke   | Weighted mode             | 8  | 0.7924 | 0.3380 | 1.8576  | 0.6090 | 0.0117  | 0.0309 | 0.7173 | 8.1167  | 0.2297 | 5.7407    |
| MF0051 | Stroke              | MR Egger                  | 12 | 0.7714 | 0.4248 | 1.4007  | 0.4137 | 0.0165  | 0.0144 | 0.2803 | 29.3234 | 0.0020 | 14.0981   |
| MF0051 | Stroke              | Weighted median           | 12 | 0.8013 | 0.6316 | 1.0167  | 0.0682 | 0.0165  | 0.0144 | 0.2803 | 29.3234 | 0.0020 | 14.0981   |
| MF0051 | Stroke              | Inverse variance weighted | 12 | 1.0535 | 0.8064 | 1.3761  | 0.7025 | 0.0165  | 0.0144 | 0.2803 | 29.3234 | 0.0020 | 14.0981   |
| MF0051 | Stroke              | Simple mode               | 12 | 0.7545 | 0.5230 | 1.0883  | 0.1599 | 0.0165  | 0.0144 | 0.2803 | 29.3234 | 0.0020 | 14.0981   |
| MF0051 | Stroke              | Weighted mode             | 12 | 0.7645 | 0.5589 | 1.0457  | 0.1210 | 0.0165  | 0.0144 | 0.2803 | 29.3234 | 0.0020 | 14.0981   |
| MF0052 | CardioEmbolicStroke | MR Egger                  | 12 | 0.9459 | 0.5846 | 1.5305  | 0.8253 | 0.0140  | 0.0960 | 0.8871 | 4.1936  | 0.9382 | -215.8846 |
| MF0052 | CardioEmbolicStroke | Weighted median           | 12 | 0.9873 | 0.8707 | 1.1196  | 0.8423 | 0.0140  | 0.0960 | 0.8871 | 4.1936  | 0.9382 | -215.8846 |
| MF0052 | CardioEmbolicStroke | Inverse variance weighted | 12 | 0.9796 | 0.8872 | 1.0815  | 0.6825 | 0.0140  | 0.0960 | 0.8871 | 4.1936  | 0.9382 | -215.8846 |
| MF0052 | CardioEmbolicStroke | Simple mode               | 12 | 0.9838 | 0.8104 | 1.1943  | 0.8718 | 0.0140  | 0.0960 | 0.8871 | 4.1936  | 0.9382 | -215.8846 |
| MF0052 | CardioEmbolicStroke | Weighted mode             | 12 | 0.9600 | 0.7854 | 1.1733  | 0.6975 | 0.0140  | 0.0960 | 0.8871 | 4.1936  | 0.9382 | -215.8846 |
| MF0052 | IschemicStroke      | MR Egger                  | 15 | 0.9752 | 0.9080 | 1.0475  | 0.5033 | 0.0088  | 0.0161 | 0.5935 | 21.5250 | 0.0632 | -103.8439 |
| MF0052 | IschemicStroke      | Weighted median           | 15 | 0.9896 | 0.9609 | 1.0191  | 0.4840 | 0.0088  | 0.0161 | 0.5935 | 21.5250 | 0.0632 | -103.8439 |
| MF0052 | IschemicStroke      | Inverse variance weighted | 15 | 0.9936 | 0.9695 | 1.0183  | 0.6081 | 0.0088  | 0.0161 | 0.5935 | 21.5250 | 0.0632 | -103.8439 |
| MF0052 | IschemicStroke      | Simple mode               | 15 | 1.0031 | 0.9552 | 1.0535  | 0.9023 | 0.0088  | 0.0161 | 0.5935 | 21.5250 | 0.0632 | -103.8439 |
| MF0052 | IschemicStroke      | Weighted mode             | 15 | 0.9906 | 0.9508 | 1.0322  | 0.6606 | 0.0088  | 0.0161 | 0.5935 | 21.5250 | 0.0632 | -103.8439 |
| MF0052 | LargeArteryStroke   | MR Egger                  | 15 | 0.9070 | 0.7335 | 1.1216  | 0.3840 | 0.0330  | 0.0481 | 0.5042 | 18.5753 | 0.1369 | -23.8712  |
| MF0052 | LargeArteryStroke   | Weighted median           | 15 | 0.9619 | 0.8749 | 1.0575  | 0.4216 | 0.0330  | 0.0481 | 0.5042 | 18.5753 | 0.1369 | -23.8712  |
| MF0052 | LargeArteryStroke   | Inverse variance weighted | 15 | 0.9723 | 0.9026 | 1.0473  | 0.4588 | 0.0330  | 0.0481 | 0.5042 | 18.5753 | 0.1369 | -23.8712  |
| MF0052 | LargeArteryStroke   | Simple mode               | 15 | 0.9518 | 0.8168 | 1.1091  | 0.5370 | 0.0330  | 0.0481 | 0.5042 | 18.5753 | 0.1369 | -23.8712  |
| MF0052 | LargeArteryStroke   | Weighted mode             | 15 | 0.9518 | 0.8406 | 1.0778  | 0.4489 | 0.0330  | 0.0481 | 0.5042 | 18.5753 | 0.1369 | -23.8712  |
| MF0052 | SmallVesselStroke   | MR Egger                  | 15 | 0.9640 | 0.8620 | 1.0782  | 0.5324 | 0.0252  | 0.0253 | 0.3365 | 17.7085 | 0.2204 | -57.4353  |
| MF0052 | SmallVesselStroke   | Weighted median           | 15 | 1.0064 | 0.9573 | 1.0581  | 0.8024 | 0.0252  | 0.0253 | 0.3365 | 17.7085 | 0.2204 | -57.4353  |
| MF0052 | SmallVesselStroke   | Inverse variance weighted | 15 | 1.0168 | 0.9773 | 1.0579  | 0.4098 | 0.0252  | 0.0253 | 0.3365 | 17.7085 | 0.2204 | -57.4353  |
| MF0052 | SmallVesselStroke   | Simple mode               | 15 | 1.0541 | 0.9647 | 1.1517  | 0.2633 | 0.0252  | 0.0253 | 0.3365 | 17.7085 | 0.2204 | -57.4353  |
| MF0052 | SmallVesselStroke   | Weighted mode             | 15 | 0.9534 | 0.8832 | 1.0291  | 0.2408 | 0.0252  | 0.0253 | 0.3365 | 17.7085 | 0.2204 | -57.4353  |
| MF0052 | Stroke              | MR Egger                  | 15 | 0.9773 | 0.9238 | 1.0338  | 0.4374 | 0.0089  | 0.0125 | 0.4883 | 17.1164 | 0.1940 | -176.8473 |
| MF0052 | Stroke              | Weighted median           | 15 | 0.9969 | 0.9732 | 1.0212  | 0.8013 | 0.0089  | 0.0125 | 0.4883 | 17.1164 | 0.1940 | -176.8473 |
| MF0052 | Stroke              | Inverse variance weighted | 15 | 0.9962 | 0.9776 | 1.0153  | 0.6966 | 0.0089  | 0.0125 | 0.4883 | 17.1164 | 0.1940 | -176.8473 |
| MF0052 | Stroke              | Simple mode               | 15 | 1.0033 | 0.9635 | 1.0448  | 0.8751 | 0.0089  | 0.0125 | 0.4883 | 17.1164 | 0.1940 | -176.8473 |
| MF0052 | Stroke              | Weighted mode             | 15 | 0.9987 | 0.9604 | 1.0385  | 0.9484 | 0.0089  | 0.0125 | 0.4883 | 17.1164 | 0.1940 | -176.8473 |
| MF0054 | CardioEmbolicStroke | MR Egger                  | 14 | 1.9496 | 0.1612 | 23.5829 | 0.6092 | -0.0330 | 0.0598 | 0.5913 | 5.1122  | 0.9541 | 1.5969    |
| MF0054 | CardioEmbolicStroke | Weighted median           | 14 | 1.0244 | 0.3888 | 2.6989  | 0.9611 | -0.0330 | 0.0598 | 0.5913 | 5.1122  | 0.9541 | 1.5969    |
| MF0054 | CardioEmbolicStroke | Inverse variance weighted | 14 | 0.9967 | 0.4803 | 2.0685  | 0.9930 | -0.0330 | 0.0598 | 0.5913 | 5.1122  | 0.9541 | 1.5969    |
| MF0054 | CardioEmbolicStroke | Simple mode               | 14 | 1.8268 | 0.3438 | 9.7074  | 0.4920 | -0.0330 | 0.0598 | 0.5913 | 5.1122  | 0.9541 | 1.5969    |
| MF0054 | CardioEmbolicStroke | Weighted mode             | 14 | 1.8468 | 0.3244 | 10.5127 | 0.5015 | -0.0330 | 0.0598 | 0.5913 | 5.1122  | 0.9541 | 1.5969    |
| MF0054 | IschemicStroke      | MR Egger                  | 20 | 1.1325 | 0.7488 | 1.7127  | 0.5628 | -0.0108 | 0.0111 | 0.3425 | 22.2126 | 0.2738 | 11.7280   |
| MF0054 | IschemicStroke      | Weighted median           | 20 | 0.8827 | 0.7085 | 1.0997  | 0.2659 | -0.0108 | 0.0111 | 0.3425 | 22.2126 | 0.2738 | 11.7280   |
| MF0054 | IschemicStroke      | Inverse variance weighted | 20 | 0.9363 | 0.7998 | 1.0962  | 0.4134 | -0.0108 | 0.0111 | 0.3425 | 22.2126 | 0.2738 | 11.7280   |
| MF0054 | IschemicStroke      | Simple mode               | 20 | 0.8193 | 0.5438 | 1.2344  | 0.3525 | -0.0108 | 0.0111 | 0.3425 | 22.2126 | 0.2738 | 11.7280   |
| MF0054 | IschemicStroke      | Weighted mode             | 20 | 0.8629 | 0.6140 | 1.2128  | 0.4065 | -0.0108 | 0.0111 | 0.3425 | 22.2126 | 0.2738 | 11.7280   |
| MF0054 | LargeArteryStroke   | MR Egger                  | 17 | 0.9518 | 0.2533 | 3.5769  | 0.9427 | -0.0028 | 0.0346 | 0.9355 | 12.5735 | 0.6352 | 2.3938    |
| MF0054 | LargeArteryStroke   | Weighted median           | 17 | 0.7086 | 0.3656 | 1.3735  | 0.3077 | -0.0028 | 0.0346 | 0.9355 | 12.5735 | 0.6352 | 2.3938    |
| MF0054 | LargeArteryStroke   | Inverse variance weighted | 17 | 0.9040 | 0.5520 | 1.4803  | 0.6883 | -0.0028 | 0.0346 | 0.9355 | 12.5735 | 0.6352 | 2.3938    |
| MF0054 | LargeArteryStroke   | Simple mode               | 17 | 0.7329 | 0.2622 | 2.0481  | 0.5616 | -0.0028 | 0.0346 | 0.9355 | 12.5735 | 0.6352 | 2.3938    |
| MF0054 | LargeArteryStroke   | Weighted mode             | 17 | 0.7952 | 0.3178 | 1.9899  | 0.6311 | -0.0028 | 0.0346 | 0.9355 | 12.5735 | 0.6352 | 2.3938    |
| MF0054 | SmallVesselStroke   | MR Egger                  | 19 | 0.9518 | 0.4690 | 1.9319  | 0.8929 | -0.0067 | 0.0189 | 0.7253 | 17.6275 | 0.4127 | 5.8719    |
| MF0054 | SmallVesselStroke   | Weighted median           | 19 | 0.7735 | 0.5260 | 1.1374  | 0.1917 | -0.0067 | 0.0189 | 0.7253 | 17.6275 | 0.4127 | 5.8719    |
| MF0054 | SmallVesselStroke   | Inverse variance weighted | 19 | 0.8448 | 0.6479 | 1.1016  | 0.2130 | -0.0067 | 0.0189 | 0.7253 | 17.6275 | 0.4127 | 5.8719    |
| MF0054 | SmallVesselStroke   | Simple mode               | 19 | 0.6126 | 0.3108 | 1.2074  | 0.1740 | -0.0067 | 0.0189 | 0.7253 | 17.6275 | 0.4127 | 5.8719    |

|        |                     |                           |    |        |        |        |        |         |        |        |         |        |             |
|--------|---------------------|---------------------------|----|--------|--------|--------|--------|---------|--------|--------|---------|--------|-------------|
| MF0054 | SmallVesselStroke   | Weighted mode             | 19 | 0.6018 | 0.3190 | 1.1354 | 0.1343 | -0.0067 | 0.0189 | 0.7253 | 17.6275 | 0.4127 | 5.8719      |
| MF0054 | Stroke              | MR Egger                  | 21 | 1.0224 | 0.7314 | 1.4291 | 0.8983 | -0.0056 | 0.0089 | 0.5352 | 18.9421 | 0.4606 | 17.7175     |
| MF0054 | Stroke              | Weighted median           | 21 | 0.9005 | 0.7585 | 1.0693 | 0.2318 | -0.0056 | 0.0089 | 0.5352 | 18.9421 | 0.4606 | 17.7175     |
| MF0054 | Stroke              | Inverse variance weighted | 21 | 0.9252 | 0.8151 | 1.0500 | 0.2285 | -0.0056 | 0.0089 | 0.5352 | 18.9421 | 0.4606 | 17.7175     |
| MF0054 | Stroke              | Simple mode               | 21 | 0.9540 | 0.7033 | 1.2941 | 0.7653 | -0.0056 | 0.0089 | 0.5352 | 18.9421 | 0.4606 | 17.7175     |
| MF0054 | Stroke              | Weighted mode             | 21 | 0.8807 | 0.6745 | 1.1498 | 0.3615 | -0.0056 | 0.0089 | 0.5352 | 18.9421 | 0.4606 | 17.7175     |
| MF0055 | CardioEmbolicStroke | MR Egger                  | 12 | 1.3030 | 0.3546 | 4.7879 | 0.6986 | -0.0114 | 0.0692 | 0.8729 | 4.7852  | 0.9051 | 16.9961     |
| MF0055 | CardioEmbolicStroke | Weighted median           | 12 | 1.2034 | 0.7857 | 1.8432 | 0.3947 | -0.0114 | 0.0692 | 0.8729 | 4.7852  | 0.9051 | 16.9961     |
| MF0055 | CardioEmbolicStroke | Inverse variance weighted | 12 | 1.1726 | 0.8418 | 1.6333 | 0.3463 | -0.0114 | 0.0692 | 0.8729 | 4.7852  | 0.9051 | 16.9961     |
| MF0055 | CardioEmbolicStroke | Simple mode               | 12 | 1.0697 | 0.5362 | 2.1342 | 0.8518 | -0.0114 | 0.0692 | 0.8729 | 4.7852  | 0.9051 | 16.9961     |
| MF0055 | CardioEmbolicStroke | Weighted mode             | 12 | 1.0542 | 0.5527 | 2.0109 | 0.8756 | -0.0114 | 0.0692 | 0.8729 | 4.7852  | 0.9051 | 16.9961     |
| MF0055 | IschemicStroke      | MR Egger                  | 17 | 0.9667 | 0.8472 | 1.1030 | 0.6218 | 0.0051  | 0.0088 | 0.5754 | 19.8434 | 0.1780 | 270966.0461 |
| MF0055 | IschemicStroke      | Weighted median           | 17 | 1.0201 | 0.9383 | 1.1090 | 0.6408 | 0.0051  | 0.0088 | 0.5754 | 19.8434 | 0.1780 | 270966.0461 |
| MF0055 | IschemicStroke      | Inverse variance weighted | 17 | 0.9992 | 0.9350 | 1.0677 | 0.9802 | 0.0051  | 0.0088 | 0.5754 | 19.8434 | 0.1780 | 270966.0461 |
| MF0055 | IschemicStroke      | Simple mode               | 17 | 1.0240 | 0.8945 | 1.1721 | 0.7359 | 0.0051  | 0.0088 | 0.5754 | 19.8434 | 0.1780 | 270966.0461 |
| MF0055 | IschemicStroke      | Weighted mode             | 17 | 1.0130 | 0.9024 | 1.1373 | 0.8289 | 0.0051  | 0.0088 | 0.5754 | 19.8434 | 0.1780 | 270966.0461 |
| MF0055 | LargeArteryStroke   | MR Egger                  | 15 | 0.8334 | 0.5151 | 1.3482 | 0.4709 | 0.0217  | 0.0297 | 0.4789 | 13.9117 | 0.3801 | 103.1652    |
| MF0055 | LargeArteryStroke   | Weighted median           | 15 | 0.9157 | 0.6714 | 1.2489 | 0.5781 | 0.0217  | 0.0297 | 0.4789 | 13.9117 | 0.3801 | 103.1652    |
| MF0055 | LargeArteryStroke   | Inverse variance weighted | 15 | 0.9777 | 0.7900 | 1.2100 | 0.8356 | 0.0217  | 0.0297 | 0.4789 | 13.9117 | 0.3801 | 103.1652    |
| MF0055 | LargeArteryStroke   | Simple mode               | 15 | 0.7908 | 0.4780 | 1.3083 | 0.3763 | 0.0217  | 0.0297 | 0.4789 | 13.9117 | 0.3801 | 103.1652    |
| MF0055 | LargeArteryStroke   | Weighted mode             | 15 | 0.8716 | 0.5787 | 1.3129 | 0.5215 | 0.0217  | 0.0297 | 0.4789 | 13.9117 | 0.3801 | 103.1652    |
| MF0055 | SmallVesselStroke   | MR Egger                  | 15 | 0.9758 | 0.7406 | 1.2855 | 0.8642 | 0.0005  | 0.0169 | 0.9773 | 14.1841 | 0.3610 | 427.3063    |
| MF0055 | SmallVesselStroke   | Weighted median           | 15 | 0.9955 | 0.8321 | 1.1910 | 0.9607 | 0.0005  | 0.0169 | 0.9773 | 14.1841 | 0.3610 | 427.3063    |
| MF0055 | SmallVesselStroke   | Inverse variance weighted | 15 | 0.9793 | 0.8702 | 1.1021 | 0.7287 | 0.0005  | 0.0169 | 0.9773 | 14.1841 | 0.3610 | 427.3063    |
| MF0055 | SmallVesselStroke   | Simple mode               | 15 | 0.9996 | 0.7296 | 1.3693 | 0.9978 | 0.0005  | 0.0169 | 0.9773 | 14.1841 | 0.3610 | 427.3063    |
| MF0055 | SmallVesselStroke   | Weighted mode             | 15 | 1.0087 | 0.7703 | 1.3209 | 0.9506 | 0.0005  | 0.0169 | 0.9773 | 14.1841 | 0.3610 | 427.3063    |
| MF0055 | Stroke              | MR Egger                  | 15 | 1.0019 | 0.8377 | 1.1982 | 0.9841 | 0.0024  | 0.0102 | 0.8169 | 11.4311 | 0.5747 | 248.5845    |
| MF0055 | Stroke              | Weighted median           | 15 | 1.0172 | 0.9390 | 1.1019 | 0.6768 | 0.0024  | 0.0102 | 0.8169 | 11.4311 | 0.5747 | 248.5845    |
| MF0055 | Stroke              | Inverse variance weighted | 15 | 1.0225 | 0.9634 | 1.0851 | 0.4644 | 0.0024  | 0.0102 | 0.8169 | 11.4311 | 0.5747 | 248.5845    |
| MF0055 | Stroke              | Simple mode               | 15 | 0.9981 | 0.8677 | 1.1482 | 0.9794 | 0.0024  | 0.0102 | 0.8169 | 11.4311 | 0.5747 | 248.5845    |
| MF0055 | Stroke              | Weighted mode             | 15 | 0.9981 | 0.8586 | 1.1603 | 0.9808 | 0.0024  | 0.0102 | 0.8169 | 11.4311 | 0.5747 | 248.5845    |
| MF0056 | CardioEmbolicStroke | MR Egger                  | 8  | 1.4043 | 0.5037 | 3.9148 | 0.5403 | -0.0913 | 0.0745 | 0.2663 | 7.6977  | 0.3600 | 8.8588      |
| MF0056 | CardioEmbolicStroke | Weighted median           | 8  | 0.8061 | 0.5314 | 1.2227 | 0.3105 | -0.0913 | 0.0745 | 0.2663 | 7.6977  | 0.3600 | 8.8588      |
| MF0056 | CardioEmbolicStroke | Inverse variance weighted | 8  | 0.7612 | 0.5563 | 1.0415 | 0.0881 | -0.0913 | 0.0745 | 0.2663 | 7.6977  | 0.3600 | 8.8588      |
| MF0056 | CardioEmbolicStroke | Simple mode               | 8  | 0.7425 | 0.3716 | 1.4839 | 0.4273 | -0.0913 | 0.0745 | 0.2663 | 7.6977  | 0.3600 | 8.8588      |
| MF0056 | CardioEmbolicStroke | Weighted mode             | 8  | 0.7748 | 0.3837 | 1.5648 | 0.4998 | -0.0913 | 0.0745 | 0.2663 | 7.6977  | 0.3600 | 8.8588      |
| MF0056 | IschemicStroke      | MR Egger                  | 20 | 0.9742 | 0.9075 | 1.0458 | 0.4789 | 0.0035  | 0.0080 | 0.6664 | 13.8870 | 0.7364 | -106.3884   |
| MF0056 | IschemicStroke      | Weighted median           | 20 | 0.9835 | 0.9292 | 1.0410 | 0.5666 | 0.0035  | 0.0080 | 0.6664 | 13.8870 | 0.7364 | -106.3884   |
| MF0056 | IschemicStroke      | Inverse variance weighted | 20 | 0.9869 | 0.9473 | 1.0281 | 0.5270 | 0.0035  | 0.0080 | 0.6664 | 13.8870 | 0.7364 | -106.3884   |
| MF0056 | IschemicStroke      | Simple mode               | 20 | 0.9908 | 0.9016 | 1.0889 | 0.8504 | 0.0035  | 0.0080 | 0.6664 | 13.8870 | 0.7364 | -106.3884   |
| MF0056 | IschemicStroke      | Weighted mode             | 20 | 0.9861 | 0.9092 | 1.0694 | 0.7381 | 0.0035  | 0.0080 | 0.6664 | 13.8870 | 0.7364 | -106.3884   |
| MF0056 | LargeArteryStroke   | MR Egger                  | 13 | 0.7709 | 0.5853 | 1.0155 | 0.0912 | 0.0334  | 0.0282 | 0.2618 | 12.4462 | 0.4105 | -139.9965   |
| MF0056 | LargeArteryStroke   | Weighted median           | 13 | 0.9353 | 0.7543 | 1.1598 | 0.5424 | 0.0334  | 0.0282 | 0.2618 | 12.4462 | 0.4105 | -139.9965   |
| MF0056 | LargeArteryStroke   | Inverse variance weighted | 13 | 0.8859 | 0.7597 | 1.0331 | 0.1223 | 0.0334  | 0.0282 | 0.2618 | 12.4462 | 0.4105 | -139.9965   |
| MF0056 | LargeArteryStroke   | Simple mode               | 13 | 1.0075 | 0.7120 | 1.4256 | 0.9671 | 0.0334  | 0.0282 | 0.2618 | 12.4462 | 0.4105 | -139.9965   |
| MF0056 | LargeArteryStroke   | Weighted mode             | 13 | 0.9433 | 0.6643 | 1.3394 | 0.7497 | 0.0334  | 0.0282 | 0.2618 | 12.4462 | 0.4105 | -139.9965   |
| MF0056 | SmallVesselStroke   | MR Egger                  | 14 | 1.0011 | 0.8541 | 1.1734 | 0.9894 | 0.0048  | 0.0160 | 0.7708 | 10.1709 | 0.6010 | -435.8780   |
| MF0056 | SmallVesselStroke   | Weighted median           | 14 | 1.0484 | 0.9307 | 1.1808 | 0.4367 | 0.0048  | 0.0160 | 0.7708 | 10.1709 | 0.6010 | -435.8780   |
| MF0056 | SmallVesselStroke   | Inverse variance weighted | 14 | 1.0217 | 0.9381 | 1.1127 | 0.6218 | 0.0048  | 0.0160 | 0.7708 | 10.1709 | 0.6010 | -435.8780   |
| MF0056 | SmallVesselStroke   | Simple mode               | 14 | 1.0840 | 0.8996 | 1.3062 | 0.4117 | 0.0048  | 0.0160 | 0.7708 | 10.1709 | 0.6010 | -435.8780   |
| MF0056 | SmallVesselStroke   | Weighted mode             | 14 | 1.0571 | 0.8788 | 1.2715 | 0.5658 | 0.0048  | 0.0160 | 0.7708 | 10.1709 | 0.6010 | -435.8780   |
| MF0056 | Stroke              | MR Egger                  | 17 | 1.0099 | 0.9348 | 1.0911 | 0.8063 | -0.0042 | 0.0077 | 0.5965 | 12.3444 | 0.6528 | -336.2521   |
| MF0056 | Stroke              | Weighted median           | 17 | 1.0163 | 0.9600 | 1.0759 | 0.5785 | -0.0042 | 0.0077 | 0.5965 | 12.3444 | 0.6528 | -336.2521   |

|        |                     |                           |    |        |        |        |        |         |        |        |         |        |             |
|--------|---------------------|---------------------------|----|--------|--------|--------|--------|---------|--------|--------|---------|--------|-------------|
| MF0056 | Stroke              | Inverse variance weighted | 17 | 0.9917 | 0.9522 | 1.0329 | 0.6893 | -0.0042 | 0.0077 | 0.5965 | 12.3444 | 0.6528 | -336.2521   |
| MF0056 | Stroke              | Simple mode               | 17 | 1.0218 | 0.9278 | 1.1253 | 0.6676 | -0.0042 | 0.0077 | 0.5965 | 12.3444 | 0.6528 | -336.2521   |
| MF0056 | Stroke              | Weighted mode             | 17 | 1.0429 | 0.9500 | 1.1449 | 0.3907 | -0.0042 | 0.0077 | 0.5965 | 12.3444 | 0.6528 | -336.2521   |
| MF0057 | IschemicStroke      | MR Egger                  | 6  | 1.1175 | 0.9606 | 1.3001 | 0.2233 | -0.0386 | 0.0416 | 0.4063 | 2.0951  | 0.8358 | -490.6514   |
| MF0057 | IschemicStroke      | Weighted median           | 6  | 1.0364 | 0.9749 | 1.1016 | 0.2518 | -0.0386 | 0.0416 | 0.4063 | 2.0951  | 0.8358 | -490.6514   |
| MF0057 | IschemicStroke      | Inverse variance weighted | 6  | 1.0442 | 0.9952 | 1.0956 | 0.0777 | -0.0386 | 0.0416 | 0.4063 | 2.0951  | 0.8358 | -490.6514   |
| MF0057 | IschemicStroke      | Simple mode               | 6  | 1.0054 | 0.9229 | 1.0953 | 0.9067 | -0.0386 | 0.0416 | 0.4063 | 2.0951  | 0.8358 | -490.6514   |
| MF0057 | IschemicStroke      | Weighted mode             | 6  | 1.0087 | 0.9333 | 1.0903 | 0.8353 | -0.0386 | 0.0416 | 0.4063 | 2.0951  | 0.8358 | -490.6514   |
| MF0057 | LargeArteryStroke   | MR Egger                  | 3  | 1.3277 | 0.5902 | 2.9865 | 0.6175 | -0.1759 | 0.2161 | 0.5651 | 0.7924  | 0.6729 | 11451.8261  |
| MF0057 | LargeArteryStroke   | Weighted median           | 3  | 0.9888 | 0.7764 | 1.2592 | 0.9270 | -0.1759 | 0.2161 | 0.5651 | 0.7924  | 0.6729 | 11451.8261  |
| MF0057 | LargeArteryStroke   | Inverse variance weighted | 3  | 0.9598 | 0.7730 | 1.1918 | 0.7104 | -0.1759 | 0.2161 | 0.5651 | 0.7924  | 0.6729 | 11451.8261  |
| MF0057 | LargeArteryStroke   | Simple mode               | 3  | 0.9932 | 0.7382 | 1.3363 | 0.9684 | -0.1759 | 0.2161 | 0.5651 | 0.7924  | 0.6729 | 11451.8261  |
| MF0057 | LargeArteryStroke   | Weighted mode             | 3  | 1.0042 | 0.7608 | 1.3254 | 0.9790 | -0.1759 | 0.2161 | 0.5651 | 0.7924  | 0.6729 | 11451.8261  |
| MF0057 | SmallVesselStroke   | MR Egger                  | 5  | 0.9232 | 0.6468 | 1.3176 | 0.6895 | 0.0455  | 0.1066 | 0.6984 | 0.8788  | 0.8305 | -671.7754   |
| MF0057 | SmallVesselStroke   | Weighted median           | 5  | 0.9919 | 0.8859 | 1.1107 | 0.8883 | 0.0455  | 0.1066 | 0.6984 | 0.8788  | 0.8305 | -671.7754   |
| MF0057 | SmallVesselStroke   | Inverse variance weighted | 5  | 0.9950 | 0.9097 | 1.0884 | 0.9134 | 0.0455  | 0.1066 | 0.6984 | 0.8788  | 0.8305 | -671.7754   |
| MF0057 | SmallVesselStroke   | Simple mode               | 5  | 0.9892 | 0.8620 | 1.1352 | 0.8847 | 0.0455  | 0.1066 | 0.6984 | 0.8788  | 0.8305 | -671.7754   |
| MF0057 | SmallVesselStroke   | Weighted mode             | 5  | 0.9918 | 0.8702 | 1.1304 | 0.9081 | 0.0455  | 0.1066 | 0.6984 | 0.8788  | 0.8305 | -671.7754   |
| MF0057 | Stroke              | MR Egger                  | 6  | 1.1377 | 0.9921 | 1.3047 | 0.1386 | -0.0441 | 0.0310 | 0.2276 | 4.1132  | 0.5332 | -1418.9990  |
| MF0057 | Stroke              | Weighted median           | 6  | 1.0471 | 0.9794 | 1.1195 | 0.1773 | -0.0441 | 0.0310 | 0.2276 | 4.1132  | 0.5332 | -1418.9990  |
| MF0057 | Stroke              | Inverse variance weighted | 6  | 1.0371 | 0.9863 | 1.0906 | 0.1553 | -0.0441 | 0.0310 | 0.2276 | 4.1132  | 0.5332 | -1418.9990  |
| MF0057 | Stroke              | Simple mode               | 6  | 1.0508 | 0.9518 | 1.1602 | 0.3712 | -0.0441 | 0.0310 | 0.2276 | 4.1132  | 0.5332 | -1418.9990  |
| MF0057 | Stroke              | Weighted mode             | 6  | 1.0668 | 0.9777 | 1.1639 | 0.2060 | -0.0441 | 0.0310 | 0.2276 | 4.1132  | 0.5332 | -1418.9990  |
| MF0058 | CardioEmbolicStroke | MR Egger                  | 8  | 0.5332 | 0.2233 | 1.2728 | 0.2063 | 0.0744  | 0.0543 | 0.2195 | 2.4444  | 0.9312 | 17.7332     |
| MF0058 | CardioEmbolicStroke | Weighted median           | 8  | 0.8981 | 0.5692 | 1.4170 | 0.6440 | 0.0744  | 0.0543 | 0.2195 | 2.4444  | 0.9312 | 17.7332     |
| MF0058 | CardioEmbolicStroke | Inverse variance weighted | 8  | 0.9274 | 0.6461 | 1.3311 | 0.6826 | 0.0744  | 0.0543 | 0.2195 | 2.4444  | 0.9312 | 17.7332     |
| MF0058 | CardioEmbolicStroke | Simple mode               | 8  | 1.2209 | 0.5900 | 2.5265 | 0.6072 | 0.0744  | 0.0543 | 0.2195 | 2.4444  | 0.9312 | 17.7332     |
| MF0058 | CardioEmbolicStroke | Weighted mode             | 8  | 0.7088 | 0.3741 | 1.3430 | 0.3262 | 0.0744  | 0.0543 | 0.2195 | 2.4444  | 0.9312 | 17.7332     |
| MF0058 | IschemicStroke      | MR Egger                  | 14 | 1.0716 | 0.9453 | 1.2149 | 0.3011 | -0.0152 | 0.0100 | 0.1544 | 17.2282 | 0.1891 | 229259.2734 |
| MF0058 | IschemicStroke      | Weighted median           | 14 | 1.0101 | 0.9209 | 1.1079 | 0.8317 | -0.0152 | 0.0100 | 0.1544 | 17.2282 | 0.1891 | 229259.2734 |
| MF0058 | IschemicStroke      | Inverse variance weighted | 14 | 0.9879 | 0.9191 | 1.0618 | 0.7406 | -0.0152 | 0.0100 | 0.1544 | 17.2282 | 0.1891 | 229259.2734 |
| MF0058 | IschemicStroke      | Simple mode               | 14 | 0.9892 | 0.8441 | 1.1592 | 0.8951 | -0.0152 | 0.0100 | 0.1544 | 17.2282 | 0.1891 | 229259.2734 |
| MF0058 | IschemicStroke      | Weighted mode             | 14 | 1.0061 | 0.8755 | 1.1562 | 0.9325 | -0.0152 | 0.0100 | 0.1544 | 17.2282 | 0.1891 | 229259.2734 |
| MF0058 | LargeArteryStroke   | MR Egger                  | 11 | 1.1444 | 0.6791 | 1.9286 | 0.6246 | -0.0119 | 0.0363 | 0.7515 | 9.6454  | 0.3799 | 47.0387     |
| MF0058 | LargeArteryStroke   | Weighted median           | 11 | 1.0014 | 0.7233 | 1.3865 | 0.9931 | -0.0119 | 0.0363 | 0.7515 | 9.6454  | 0.3799 | 47.0387     |
| MF0058 | LargeArteryStroke   | Inverse variance weighted | 11 | 1.0599 | 0.8364 | 1.3431 | 0.6303 | -0.0119 | 0.0363 | 0.7515 | 9.6454  | 0.3799 | 47.0387     |
| MF0058 | LargeArteryStroke   | Simple mode               | 11 | 0.8151 | 0.4777 | 1.3910 | 0.4707 | -0.0119 | 0.0363 | 0.7515 | 9.6454  | 0.3799 | 47.0387     |
| MF0058 | LargeArteryStroke   | Weighted mode             | 11 | 0.8562 | 0.5219 | 1.4047 | 0.5526 | -0.0119 | 0.0363 | 0.7515 | 9.6454  | 0.3799 | 47.0387     |
| MF0058 | SmallVesselStroke   | MR Egger                  | 12 | 1.0545 | 0.7859 | 1.4148 | 0.7309 | -0.0199 | 0.0213 | 0.3730 | 13.2404 | 0.2105 | 159.2313    |
| MF0058 | SmallVesselStroke   | Weighted median           | 12 | 0.9770 | 0.8110 | 1.1770 | 0.8067 | -0.0199 | 0.0213 | 0.3730 | 13.2404 | 0.2105 | 159.2313    |
| MF0058 | SmallVesselStroke   | Inverse variance weighted | 12 | 0.9335 | 0.8087 | 1.0776 | 0.3475 | -0.0199 | 0.0213 | 0.3730 | 13.2404 | 0.2105 | 159.2313    |
| MF0058 | SmallVesselStroke   | Simple mode               | 12 | 0.9517 | 0.6680 | 1.3559 | 0.7892 | -0.0199 | 0.0213 | 0.3730 | 13.2404 | 0.2105 | 159.2313    |
| MF0058 | SmallVesselStroke   | Weighted mode             | 12 | 0.9850 | 0.6831 | 1.4203 | 0.9371 | -0.0199 | 0.0213 | 0.3730 | 13.2404 | 0.2105 | 159.2313    |
| MF0058 | Stroke              | MR Egger                  | 13 | 1.0480 | 0.9092 | 1.2079 | 0.5311 | -0.0091 | 0.0102 | 0.3928 | 14.8700 | 0.1885 | 750.9452    |
| MF0058 | Stroke              | Weighted median           | 13 | 0.9460 | 0.8672 | 1.0320 | 0.2111 | -0.0091 | 0.0102 | 0.3928 | 14.8700 | 0.1885 | 750.9452    |
| MF0058 | Stroke              | Inverse variance weighted | 13 | 0.9906 | 0.9250 | 1.0609 | 0.7875 | -0.0091 | 0.0102 | 0.3928 | 14.8700 | 0.1885 | 750.9452    |
| MF0058 | Stroke              | Simple mode               | 13 | 0.9272 | 0.8058 | 1.0669 | 0.3121 | -0.0091 | 0.0102 | 0.3928 | 14.8700 | 0.1885 | 750.9452    |
| MF0058 | Stroke              | Weighted mode             | 13 | 0.9285 | 0.8009 | 1.0765 | 0.3452 | -0.0091 | 0.0102 | 0.3928 | 14.8700 | 0.1885 | 750.9452    |
| MF0059 | CardioEmbolicStroke | MR Egger                  | 9  | 0.6384 | 0.4687 | 0.8695 | 0.0248 | 0.1221  | 0.0444 | 0.0286 | 11.7747 | 0.1615 | -480.0201   |
| MF0059 | CardioEmbolicStroke | Weighted median           | 9  | 0.8888 | 0.7199 | 1.0973 | 0.2730 | 0.1221  | 0.0444 | 0.0286 | 11.7747 | 0.1615 | -480.0201   |
| MF0059 | CardioEmbolicStroke | Inverse variance weighted | 9  | 0.9357 | 0.7844 | 1.1162 | 0.4601 | 0.1221  | 0.0444 | 0.0286 | 11.7747 | 0.1615 | -480.0201   |
| MF0059 | CardioEmbolicStroke | Simple mode               | 9  | 0.8736 | 0.5747 | 1.3280 | 0.5448 | 0.1221  | 0.0444 | 0.0286 | 11.7747 | 0.1615 | -480.0201   |
| MF0059 | CardioEmbolicStroke | Weighted mode             | 9  | 0.8069 | 0.6139 | 1.0604 | 0.1623 | 0.1221  | 0.0444 | 0.0286 | 11.7747 | 0.1615 | -480.0201   |

|        |                     |                           |    |        |        |        |        |         |        |        |         |        |            |
|--------|---------------------|---------------------------|----|--------|--------|--------|--------|---------|--------|--------|---------|--------|------------|
| MF0059 | IschemicStroke      | MR Egger                  | 14 | 0.9976 | 0.9375 | 1.0615 | 0.9411 | 0.0002  | 0.0106 | 0.9818 | 17.3069 | 0.1384 | -180.6344  |
| MF0059 | IschemicStroke      | Weighted median           | 14 | 1.0161 | 0.9755 | 1.0584 | 0.4424 | 0.0002  | 0.0106 | 0.9818 | 17.3069 | 0.1384 | -180.6344  |
| MF0059 | IschemicStroke      | Inverse variance weighted | 14 | 0.9982 | 0.9673 | 1.0301 | 0.9125 | 0.0002  | 0.0106 | 0.9818 | 17.3069 | 0.1384 | -180.6344  |
| MF0059 | IschemicStroke      | Simple mode               | 14 | 1.0336 | 0.9673 | 1.1045 | 0.3468 | 0.0002  | 0.0106 | 0.9818 | 17.3069 | 0.1384 | -180.6344  |
| MF0059 | IschemicStroke      | Weighted mode             | 14 | 1.0222 | 0.9765 | 1.0701 | 0.3634 | 0.0002  | 0.0106 | 0.9818 | 17.3069 | 0.1384 | -180.6344  |
| MF0059 | LargeArteryStroke   | MR Egger                  | 12 | 1.0026 | 0.7894 | 1.2734 | 0.9833 | -0.0035 | 0.0389 | 0.9300 | 17.2434 | 0.0691 | -70.2121   |
| MF0059 | LargeArteryStroke   | Weighted median           | 12 | 1.0035 | 0.8782 | 1.1466 | 0.9592 | -0.0035 | 0.0389 | 0.9300 | 17.2434 | 0.0691 | -70.2121   |
| MF0059 | LargeArteryStroke   | Inverse variance weighted | 12 | 0.9932 | 0.8837 | 1.1163 | 0.9089 | -0.0035 | 0.0389 | 0.9300 | 17.2434 | 0.0691 | -70.2121   |
| MF0059 | LargeArteryStroke   | Simple mode               | 12 | 0.8220 | 0.6351 | 1.0639 | 0.1644 | -0.0035 | 0.0389 | 0.9300 | 17.2434 | 0.0691 | -70.2121   |
| MF0059 | LargeArteryStroke   | Weighted mode             | 12 | 1.0348 | 0.8919 | 1.2005 | 0.6610 | -0.0035 | 0.0389 | 0.9300 | 17.2434 | 0.0691 | -70.2121   |
| MF0059 | SmallVesselStroke   | MR Egger                  | 13 | 0.9962 | 0.9040 | 1.0978 | 0.9403 | 0.0100  | 0.0162 | 0.5477 | 5.5972  | 0.8988 | -184.2078  |
| MF0059 | SmallVesselStroke   | Weighted median           | 13 | 1.0413 | 0.9724 | 1.1151 | 0.2461 | 0.0100  | 0.0162 | 0.5477 | 5.5972  | 0.8988 | -184.2078  |
| MF0059 | SmallVesselStroke   | Inverse variance weighted | 13 | 1.0227 | 0.9726 | 1.0755 | 0.3810 | 0.0100  | 0.0162 | 0.5477 | 5.5972  | 0.8988 | -184.2078  |
| MF0059 | SmallVesselStroke   | Simple mode               | 13 | 1.0139 | 0.9093 | 1.1304 | 0.8084 | 0.0100  | 0.0162 | 0.5477 | 5.5972  | 0.8988 | -184.2078  |
| MF0059 | SmallVesselStroke   | Weighted mode             | 13 | 1.0389 | 0.9592 | 1.1253 | 0.3672 | 0.0100  | 0.0162 | 0.5477 | 5.5972  | 0.8988 | -184.2078  |
| MF0059 | Stroke              | MR Egger                  | 14 | 0.9885 | 0.9319 | 1.0486 | 0.7078 | 0.0014  | 0.0097 | 0.8859 | 18.6369 | 0.0977 | -212.7448  |
| MF0059 | Stroke              | Weighted median           | 14 | 1.0054 | 0.9685 | 1.0437 | 0.7774 | 0.0014  | 0.0097 | 0.8859 | 18.6369 | 0.0977 | -212.7448  |
| MF0059 | Stroke              | Inverse variance weighted | 14 | 0.9923 | 0.9639 | 1.0215 | 0.5999 | 0.0014  | 0.0097 | 0.8859 | 18.6369 | 0.0977 | -212.7448  |
| MF0059 | Stroke              | Simple mode               | 14 | 1.0071 | 0.9530 | 1.0644 | 0.8052 | 0.0014  | 0.0097 | 0.8859 | 18.6369 | 0.0977 | -212.7448  |
| MF0059 | Stroke              | Weighted mode             | 14 | 1.0084 | 0.9667 | 1.0520 | 0.7026 | 0.0014  | 0.0097 | 0.8859 | 18.6369 | 0.0977 | -212.7448  |
| MF0060 | CardioEmbolicStroke | MR Egger                  | 14 | 1.4929 | 0.7133 | 3.1247 | 0.3085 | -0.0226 | 0.0482 | 0.6477 | 16.5577 | 0.1670 | 9.6383     |
| MF0060 | CardioEmbolicStroke | Weighted median           | 14 | 1.3705 | 0.9520 | 1.9728 | 0.0900 | -0.0226 | 0.0482 | 0.6477 | 16.5577 | 0.1670 | 9.6383     |
| MF0060 | CardioEmbolicStroke | Inverse variance weighted | 14 | 1.2702 | 0.9509 | 1.6968 | 0.1054 | -0.0226 | 0.0482 | 0.6477 | 16.5577 | 0.1670 | 9.6383     |
| MF0060 | CardioEmbolicStroke | Simple mode               | 14 | 1.3636 | 0.7612 | 2.4428 | 0.3161 | -0.0226 | 0.0482 | 0.6477 | 16.5577 | 0.1670 | 9.6383     |
| MF0060 | CardioEmbolicStroke | Weighted mode             | 14 | 1.4195 | 0.9213 | 2.1870 | 0.1363 | -0.0226 | 0.0482 | 0.6477 | 16.5577 | 0.1670 | 9.6383     |
| MF0060 | IschemicStroke      | MR Egger                  | 19 | 1.0177 | 0.9142 | 1.1330 | 0.7520 | 0.0009  | 0.0078 | 0.9072 | 12.1128 | 0.7933 | 57587.6883 |
| MF0060 | IschemicStroke      | Weighted median           | 19 | 1.0111 | 0.9431 | 1.0841 | 0.7553 | 0.0009  | 0.0078 | 0.9072 | 12.1128 | 0.7933 | 57587.6883 |
| MF0060 | IschemicStroke      | Inverse variance weighted | 19 | 1.0235 | 0.9722 | 1.0775 | 0.3751 | 0.0009  | 0.0078 | 0.9072 | 12.1128 | 0.7933 | 57587.6883 |
| MF0060 | IschemicStroke      | Simple mode               | 19 | 1.0148 | 0.8978 | 1.1470 | 0.8170 | 0.0009  | 0.0078 | 0.9072 | 12.1128 | 0.7933 | 57587.6883 |
| MF0060 | IschemicStroke      | Weighted mode             | 19 | 0.9916 | 0.9058 | 1.0855 | 0.8565 | 0.0009  | 0.0078 | 0.9072 | 12.1128 | 0.7933 | 57587.6883 |
| MF0060 | LargeArteryStroke   | MR Egger                  | 16 | 0.8280 | 0.5650 | 1.2136 | 0.3497 | 0.0250  | 0.0267 | 0.3646 | 13.7124 | 0.4713 | 94.9755    |
| MF0060 | LargeArteryStroke   | Weighted median           | 16 | 1.0071 | 0.7738 | 1.3108 | 0.9580 | 0.0250  | 0.0267 | 0.3646 | 13.7124 | 0.4713 | 94.9755    |
| MF0060 | LargeArteryStroke   | Inverse variance weighted | 16 | 0.9739 | 0.8169 | 1.1612 | 0.7685 | 0.0250  | 0.0267 | 0.3646 | 13.7124 | 0.4713 | 94.9755    |
| MF0060 | LargeArteryStroke   | Simple mode               | 16 | 0.8690 | 0.5571 | 1.3555 | 0.5452 | 0.0250  | 0.0267 | 0.3646 | 13.7124 | 0.4713 | 94.9755    |
| MF0060 | LargeArteryStroke   | Weighted mode             | 16 | 0.9543 | 0.6909 | 1.3181 | 0.7804 | 0.0250  | 0.0267 | 0.3646 | 13.7124 | 0.4713 | 94.9755    |
| MF0060 | SmallVesselStroke   | MR Egger                  | 17 | 0.9927 | 0.8148 | 1.2095 | 0.9433 | 0.0057  | 0.0142 | 0.6918 | 11.4186 | 0.7224 | 4096.8075  |
| MF0060 | SmallVesselStroke   | Weighted median           | 17 | 1.0241 | 0.9026 | 1.1618 | 0.7119 | 0.0057  | 0.0142 | 0.6918 | 11.4186 | 0.7224 | 4096.8075  |
| MF0060 | SmallVesselStroke   | Inverse variance weighted | 17 | 1.0289 | 0.9358 | 1.1312 | 0.5564 | 0.0057  | 0.0142 | 0.6918 | 11.4186 | 0.7224 | 4096.8075  |
| MF0060 | SmallVesselStroke   | Simple mode               | 17 | 1.0445 | 0.8352 | 1.3064 | 0.7076 | 0.0057  | 0.0142 | 0.6918 | 11.4186 | 0.7224 | 4096.8075  |
| MF0060 | SmallVesselStroke   | Weighted mode             | 17 | 0.9975 | 0.8455 | 1.1767 | 0.9762 | 0.0057  | 0.0142 | 0.6918 | 11.4186 | 0.7224 | 4096.8075  |
| MF0060 | Stroke              | MR Egger                  | 18 | 0.9715 | 0.8692 | 1.0859 | 0.6174 | 0.0048  | 0.0076 | 0.5373 | 13.0642 | 0.6681 | 1314.7448  |
| MF0060 | Stroke              | Weighted median           | 18 | 0.9630 | 0.9011 | 1.0293 | 0.2670 | 0.0048  | 0.0076 | 0.5373 | 13.0642 | 0.6681 | 1314.7448  |
| MF0060 | Stroke              | Inverse variance weighted | 18 | 1.0035 | 0.9574 | 1.0519 | 0.8838 | 0.0048  | 0.0076 | 0.5373 | 13.0642 | 0.6681 | 1314.7448  |
| MF0060 | Stroke              | Simple mode               | 18 | 0.9523 | 0.8456 | 1.0726 | 0.4317 | 0.0048  | 0.0076 | 0.5373 | 13.0642 | 0.6681 | 1314.7448  |
| MF0060 | Stroke              | Weighted mode             | 18 | 0.9535 | 0.8655 | 1.0504 | 0.3483 | 0.0048  | 0.0076 | 0.5373 | 13.0642 | 0.6681 | 1314.7448  |
| MF0061 | CardioEmbolicStroke | MR Egger                  | 10 | 0.3643 | 0.0756 | 1.7563 | 0.2438 | 0.1180  | 0.0722 | 0.1408 | 10.3573 | 0.3223 | 2.2002     |
| MF0061 | CardioEmbolicStroke | Weighted median           | 10 | 1.2733 | 0.7187 | 2.2559 | 0.4076 | 0.1180  | 0.0722 | 0.1408 | 10.3573 | 0.3223 | 2.2002     |
| MF0061 | CardioEmbolicStroke | Inverse variance weighted | 10 | 1.2906 | 0.8258 | 2.0170 | 0.2628 | 0.1180  | 0.0722 | 0.1408 | 10.3573 | 0.3223 | 2.2002     |
| MF0061 | CardioEmbolicStroke | Simple mode               | 10 | 1.2327 | 0.4468 | 3.4009 | 0.6956 | 0.1180  | 0.0722 | 0.1408 | 10.3573 | 0.3223 | 2.2002     |
| MF0061 | CardioEmbolicStroke | Weighted mode             | 10 | 1.2852 | 0.4995 | 3.3068 | 0.6154 | 0.1180  | 0.0722 | 0.1408 | 10.3573 | 0.3223 | 2.2002     |
| MF0061 | IschemicStroke      | MR Egger                  | 24 | 0.9516 | 0.8478 | 1.0681 | 0.4088 | 0.0102  | 0.0079 | 0.2070 | 25.8646 | 0.3073 | -2091.6992 |
| MF0061 | IschemicStroke      | Weighted median           | 24 | 1.0244 | 0.9372 | 1.1198 | 0.5948 | 0.0102  | 0.0079 | 0.2070 | 25.8646 | 0.3073 | -2091.6992 |
| MF0061 | IschemicStroke      | Inverse variance weighted | 24 | 1.0154 | 0.9542 | 1.0806 | 0.6289 | 0.0102  | 0.0079 | 0.2070 | 25.8646 | 0.3073 | -2091.6992 |

|        |                     |                           |    |        |        |        |        |         |        |        |         |        |             |
|--------|---------------------|---------------------------|----|--------|--------|--------|--------|---------|--------|--------|---------|--------|-------------|
| MF0061 | IschemicStroke      | Simple mode               | 24 | 0.9933 | 0.8346 | 1.1821 | 0.9400 | 0.0102  | 0.0079 | 0.2070 | 25.8646 | 0.3073 | -2091.6992  |
| MF0061 | IschemicStroke      | Weighted mode             | 24 | 1.0556 | 0.8967 | 1.2427 | 0.5221 | 0.0102  | 0.0079 | 0.2070 | 25.8646 | 0.3073 | -2091.6992  |
| MF0061 | LargeArteryStroke   | MR Egger                  | 18 | 0.7624 | 0.5001 | 1.1621 | 0.2252 | 0.0263  | 0.0265 | 0.3362 | 11.5592 | 0.8261 | 193.3299    |
| MF0061 | LargeArteryStroke   | Weighted median           | 18 | 0.9462 | 0.7022 | 1.2751 | 0.7164 | 0.0263  | 0.0265 | 0.3362 | 11.5592 | 0.8261 | 193.3299    |
| MF0061 | LargeArteryStroke   | Inverse variance weighted | 18 | 0.9162 | 0.7399 | 1.1346 | 0.4224 | 0.0263  | 0.0265 | 0.3362 | 11.5592 | 0.8261 | 193.3299    |
| MF0061 | LargeArteryStroke   | Simple mode               | 18 | 1.0114 | 0.5887 | 1.7377 | 0.9676 | 0.0263  | 0.0265 | 0.3362 | 11.5592 | 0.8261 | 193.3299    |
| MF0061 | LargeArteryStroke   | Weighted mode             | 18 | 0.9936 | 0.5895 | 1.6745 | 0.9810 | 0.0263  | 0.0265 | 0.3362 | 11.5592 | 0.8261 | 193.3299    |
| MF0061 | SmallVesselStroke   | MR Egger                  | 18 | 0.8753 | 0.6578 | 1.1646 | 0.3741 | 0.0092  | 0.0181 | 0.6199 | 24.5403 | 0.0784 | 243.2773    |
| MF0061 | SmallVesselStroke   | Weighted median           | 18 | 0.9907 | 0.8244 | 1.1904 | 0.9202 | 0.0092  | 0.0181 | 0.6199 | 24.5403 | 0.0784 | 243.2773    |
| MF0061 | SmallVesselStroke   | Inverse variance weighted | 18 | 0.9326 | 0.8089 | 1.0751 | 0.3361 | 0.0092  | 0.0181 | 0.6199 | 24.5403 | 0.0784 | 243.2773    |
| MF0061 | SmallVesselStroke   | Simple mode               | 18 | 0.6758 | 0.4507 | 1.0133 | 0.0751 | 0.0092  | 0.0181 | 0.6199 | 24.5403 | 0.0784 | 243.2773    |
| MF0061 | SmallVesselStroke   | Weighted mode             | 18 | 1.0713 | 0.7765 | 1.4779 | 0.6802 | 0.0092  | 0.0181 | 0.6199 | 24.5403 | 0.0784 | 243.2773    |
| MF0061 | Stroke              | MR Egger                  | 23 | 0.9306 | 0.8345 | 1.0378 | 0.2099 | 0.0078  | 0.0072 | 0.2899 | 25.2914 | 0.2833 | -21273.4783 |
| MF0061 | Stroke              | Weighted median           | 23 | 0.9808 | 0.9091 | 1.0582 | 0.6164 | 0.0078  | 0.0072 | 0.2899 | 25.2914 | 0.2833 | -21273.4783 |
| MF0061 | Stroke              | Inverse variance weighted | 23 | 0.9800 | 0.9263 | 1.0368 | 0.4828 | 0.0078  | 0.0072 | 0.2899 | 25.2914 | 0.2833 | -21273.4783 |
| MF0061 | Stroke              | Simple mode               | 23 | 0.9867 | 0.8430 | 1.1548 | 0.8687 | 0.0078  | 0.0072 | 0.2899 | 25.2914 | 0.2833 | -21273.4783 |
| MF0061 | Stroke              | Weighted mode             | 23 | 0.9168 | 0.7868 | 1.0683 | 0.2776 | 0.0078  | 0.0072 | 0.2899 | 25.2914 | 0.2833 | -21273.4783 |
| MF0062 | CardioEmbolicStroke | MR Egger                  | 12 | 0.9196 | 0.5390 | 1.5688 | 0.7646 | -0.0071 | 0.0527 | 0.8953 | 10.4464 | 0.4022 | 254.1611    |
| MF0062 | CardioEmbolicStroke | Weighted median           | 12 | 0.9149 | 0.7138 | 1.1726 | 0.4823 | -0.0071 | 0.0527 | 0.8953 | 10.4464 | 0.4022 | 254.1611    |
| MF0062 | CardioEmbolicStroke | Inverse variance weighted | 12 | 0.8885 | 0.7373 | 1.0707 | 0.2143 | -0.0071 | 0.0527 | 0.8953 | 10.4464 | 0.4022 | 254.1611    |
| MF0062 | CardioEmbolicStroke | Simple mode               | 12 | 1.0489 | 0.6881 | 1.5987 | 0.8285 | -0.0071 | 0.0527 | 0.8953 | 10.4464 | 0.4022 | 254.1611    |
| MF0062 | CardioEmbolicStroke | Weighted mode             | 12 | 0.9595 | 0.6869 | 1.3403 | 0.8130 | -0.0071 | 0.0527 | 0.8953 | 10.4464 | 0.4022 | 254.1611    |
| MF0062 | IschemicStroke      | MR Egger                  | 20 | 1.0488 | 0.9824 | 1.1196 | 0.1704 | -0.0173 | 0.0079 | 0.0435 | 21.3701 | 0.3167 | -81.3137    |
| MF0062 | IschemicStroke      | Weighted median           | 20 | 0.9878 | 0.9402 | 1.0379 | 0.6268 | -0.0173 | 0.0079 | 0.0435 | 21.3701 | 0.3167 | -81.3137    |
| MF0062 | IschemicStroke      | Inverse variance weighted | 20 | 0.9857 | 0.9511 | 1.0215 | 0.4273 | -0.0173 | 0.0079 | 0.0435 | 21.3701 | 0.3167 | -81.3137    |
| MF0062 | IschemicStroke      | Simple mode               | 20 | 0.9691 | 0.8879 | 1.0577 | 0.4899 | -0.0173 | 0.0079 | 0.0435 | 21.3701 | 0.3167 | -81.3137    |
| MF0062 | IschemicStroke      | Weighted mode             | 20 | 0.9889 | 0.9263 | 1.0558 | 0.7418 | -0.0173 | 0.0079 | 0.0435 | 21.3701 | 0.3167 | -81.3137    |
| MF0062 | LargeArteryStroke   | MR Egger                  | 14 | 1.0141 | 0.7436 | 1.3830 | 0.9311 | -0.0045 | 0.0334 | 0.8958 | 14.0983 | 0.2945 | -500.8506   |
| MF0062 | LargeArteryStroke   | Weighted median           | 14 | 1.0816 | 0.9114 | 1.2835 | 0.3692 | -0.0045 | 0.0334 | 0.8958 | 14.0983 | 0.2945 | -500.8506   |
| MF0062 | LargeArteryStroke   | Inverse variance weighted | 14 | 0.9950 | 0.8732 | 1.1337 | 0.9394 | -0.0045 | 0.0334 | 0.8958 | 14.0983 | 0.2945 | -500.8506   |
| MF0062 | LargeArteryStroke   | Simple mode               | 14 | 1.0904 | 0.8167 | 1.4560 | 0.5673 | -0.0045 | 0.0334 | 0.8958 | 14.0983 | 0.2945 | -500.8506   |
| MF0062 | LargeArteryStroke   | Weighted mode             | 14 | 1.0713 | 0.8327 | 1.3782 | 0.6011 | -0.0045 | 0.0334 | 0.8958 | 14.0983 | 0.2945 | -500.8506   |
| MF0062 | SmallVesselStroke   | MR Egger                  | 18 | 1.0465 | 0.9211 | 1.1890 | 0.4955 | -0.0122 | 0.0154 | 0.4391 | 18.6747 | 0.2859 | -52.5321    |
| MF0062 | SmallVesselStroke   | Weighted median           | 18 | 0.9905 | 0.9084 | 1.0800 | 0.8290 | -0.0122 | 0.0154 | 0.4391 | 18.6747 | 0.2859 | -52.5321    |
| MF0062 | SmallVesselStroke   | Inverse variance weighted | 18 | 1.0012 | 0.9378 | 1.0689 | 0.9709 | -0.0122 | 0.0154 | 0.4391 | 18.6747 | 0.2859 | -52.5321    |
| MF0062 | SmallVesselStroke   | Simple mode               | 18 | 0.9244 | 0.7680 | 1.1126 | 0.4173 | -0.0122 | 0.0154 | 0.4391 | 18.6747 | 0.2859 | -52.5321    |
| MF0062 | SmallVesselStroke   | Weighted mode             | 18 | 0.9226 | 0.7816 | 1.0889 | 0.3540 | -0.0122 | 0.0154 | 0.4391 | 18.6747 | 0.2859 | -52.5321    |
| MF0062 | Stroke              | MR Egger                  | 17 | 1.0663 | 0.9875 | 1.1515 | 0.1219 | -0.0159 | 0.0082 | 0.0721 | 7.7315  | 0.9565 | -703.0071   |
| MF0062 | Stroke              | Weighted median           | 17 | 1.0027 | 0.9607 | 1.0466 | 0.9006 | -0.0159 | 0.0082 | 0.0721 | 7.7315  | 0.9565 | -703.0071   |
| MF0062 | Stroke              | Inverse variance weighted | 17 | 0.9958 | 0.9635 | 1.0292 | 0.8021 | -0.0159 | 0.0082 | 0.0721 | 7.7315  | 0.9565 | -703.0071   |
| MF0062 | Stroke              | Simple mode               | 17 | 0.9901 | 0.9166 | 1.0695 | 0.8036 | -0.0159 | 0.0082 | 0.0721 | 7.7315  | 0.9565 | -703.0071   |
| MF0062 | Stroke              | Weighted mode             | 17 | 1.0074 | 0.9421 | 1.0772 | 0.8322 | -0.0159 | 0.0082 | 0.0721 | 7.7315  | 0.9565 | -703.0071   |
| MF0063 | CardioEmbolicStroke | MR Egger                  | 17 | 0.2364 | 0.0642 | 0.8699 | 0.0465 | 0.0506  | 0.0337 | 0.1547 | 19.5971 | 0.2389 | 2.8815      |
| MF0063 | CardioEmbolicStroke | Weighted median           | 17 | 0.4793 | 0.1848 | 1.2432 | 0.1304 | 0.0506  | 0.0337 | 0.1547 | 19.5971 | 0.2389 | 2.8815      |
| MF0063 | CardioEmbolicStroke | Inverse variance weighted | 17 | 0.5606 | 0.2855 | 1.1008 | 0.0927 | 0.0506  | 0.0337 | 0.1547 | 19.5971 | 0.2389 | 2.8815      |
| MF0063 | CardioEmbolicStroke | Simple mode               | 17 | 0.7674 | 0.1676 | 3.5126 | 0.7374 | 0.0506  | 0.0337 | 0.1547 | 19.5971 | 0.2389 | 2.8815      |
| MF0063 | CardioEmbolicStroke | Weighted mode             | 17 | 0.5658 | 0.1756 | 1.8229 | 0.3542 | 0.0506  | 0.0337 | 0.1547 | 19.5971 | 0.2389 | 2.8815      |
| MF0063 | IschemicStroke      | MR Egger                  | 88 | 1.0173 | 0.9128 | 1.1338 | 0.7572 | -0.0086 | 0.0052 | 0.1048 | 99.3319 | 0.1726 | -101.5800   |
| MF0063 | IschemicStroke      | Weighted median           | 88 | 0.9112 | 0.8291 | 1.0015 | 0.0537 | -0.0086 | 0.0052 | 0.1048 | 99.3319 | 0.1726 | -101.5800   |
| MF0063 | IschemicStroke      | Inverse variance weighted | 88 | 0.9449 | 0.8867 | 1.0070 | 0.0811 | -0.0086 | 0.0052 | 0.1048 | 99.3319 | 0.1726 | -101.5800   |
| MF0063 | IschemicStroke      | Simple mode               | 88 | 0.8713 | 0.7061 | 1.0750 | 0.2020 | -0.0086 | 0.0052 | 0.1048 | 99.3319 | 0.1726 | -101.5800   |
| MF0063 | IschemicStroke      | Weighted mode             | 88 | 0.8965 | 0.7817 | 1.0283 | 0.1220 | -0.0086 | 0.0052 | 0.1048 | 99.3319 | 0.1726 | -101.5800   |
| MF0063 | LargeArteryStroke   | MR Egger                  | 44 | 1.1077 | 0.7270 | 1.6878 | 0.6366 | -0.0134 | 0.0171 | 0.4376 | 40.5329 | 0.5354 | 2.4967      |

|        |                     |                           |    |        |        |          |        |         |        |        |         |        |           |
|--------|---------------------|---------------------------|----|--------|--------|----------|--------|---------|--------|--------|---------|--------|-----------|
| MF0063 | LargeArteryStroke   | Weighted median           | 44 | 1.0885 | 0.7491 | 1.5817   | 0.6564 | -0.0134 | 0.0171 | 0.4376 | 40.5329 | 0.5354 | 2.4967    |
| MF0063 | LargeArteryStroke   | Inverse variance weighted | 44 | 0.9682 | 0.7516 | 1.2472   | 0.8026 | -0.0134 | 0.0171 | 0.4376 | 40.5329 | 0.5354 | 2.4967    |
| MF0063 | LargeArteryStroke   | Simple mode               | 44 | 1.3782 | 0.7160 | 2.6530   | 0.3424 | -0.0134 | 0.0171 | 0.4376 | 40.5329 | 0.5354 | 2.4967    |
| MF0063 | LargeArteryStroke   | Weighted mode             | 44 | 1.2056 | 0.7687 | 1.8908   | 0.4200 | -0.0134 | 0.0171 | 0.4376 | 40.5329 | 0.5354 | 2.4967    |
| MF0063 | SmallVesselStroke   | MR Egger                  | 54 | 0.9970 | 0.8043 | 1.2360   | 0.9785 | -0.0109 | 0.0094 | 0.2517 | 54.8675 | 0.4036 | 214.6604  |
| MF0063 | SmallVesselStroke   | Weighted median           | 54 | 0.9041 | 0.7499 | 1.0900   | 0.2905 | -0.0109 | 0.0094 | 0.2517 | 54.8675 | 0.4036 | 214.6604  |
| MF0063 | SmallVesselStroke   | Inverse variance weighted | 54 | 0.9002 | 0.7919 | 1.0234   | 0.1082 | -0.0109 | 0.0094 | 0.2517 | 54.8675 | 0.4036 | 214.6604  |
| MF0063 | SmallVesselStroke   | Simple mode               | 54 | 0.9153 | 0.6225 | 1.3458   | 0.6544 | -0.0109 | 0.0094 | 0.2517 | 54.8675 | 0.4036 | 214.6604  |
| MF0063 | SmallVesselStroke   | Weighted mode             | 54 | 0.8686 | 0.6567 | 1.1488   | 0.3278 | -0.0109 | 0.0094 | 0.2517 | 54.8675 | 0.4036 | 214.6604  |
| MF0063 | Stroke              | MR Egger                  | 75 | 1.0098 | 0.8871 | 1.1495   | 0.8829 | -0.0064 | 0.0049 | 0.1991 | 76.6673 | 0.3931 | 3114.6698 |
| MF0063 | Stroke              | Weighted median           | 75 | 0.9733 | 0.8813 | 1.0748   | 0.5925 | -0.0064 | 0.0049 | 0.1991 | 76.6673 | 0.3931 | 3114.6698 |
| MF0063 | Stroke              | Inverse variance weighted | 75 | 0.9394 | 0.8761 | 1.0072   | 0.0786 | -0.0064 | 0.0049 | 0.1991 | 76.6673 | 0.3931 | 3114.6698 |
| MF0063 | Stroke              | Simple mode               | 75 | 1.0418 | 0.8283 | 1.3104   | 0.7272 | -0.0064 | 0.0049 | 0.1991 | 76.6673 | 0.3931 | 3114.6698 |
| MF0063 | Stroke              | Weighted mode             | 75 | 1.0119 | 0.8379 | 1.2221   | 0.9024 | -0.0064 | 0.0049 | 0.1991 | 76.6673 | 0.3931 | 3114.6698 |
| MF0064 | CardioEmbolicStroke | MR Egger                  | 8  | 2.7620 | 0.6741 | 11.3162  | 0.2077 | -0.1861 | 0.1120 | 0.1477 | 9.8161  | 0.1992 | 10.3512   |
| MF0064 | CardioEmbolicStroke | Weighted median           | 8  | 0.9473 | 0.6573 | 1.3653   | 0.7716 | -0.1861 | 0.1120 | 0.1477 | 9.8161  | 0.1992 | 10.3512   |
| MF0064 | CardioEmbolicStroke | Inverse variance weighted | 8  | 0.8551 | 0.6285 | 1.1634   | 0.3189 | -0.1861 | 0.1120 | 0.1477 | 9.8161  | 0.1992 | 10.3512   |
| MF0064 | CardioEmbolicStroke | Simple mode               | 8  | 0.9225 | 0.5145 | 1.6541   | 0.7944 | -0.1861 | 0.1120 | 0.1477 | 9.8161  | 0.1992 | 10.3512   |
| MF0064 | CardioEmbolicStroke | Weighted mode             | 8  | 0.9587 | 0.5920 | 1.5523   | 0.8685 | -0.1861 | 0.1120 | 0.1477 | 9.8161  | 0.1992 | 10.3512   |
| MF0064 | IschemicStroke      | MR Egger                  | 12 | 0.9217 | 0.7699 | 1.1034   | 0.3955 | 0.0118  | 0.0156 | 0.4681 | 3.3080  | 0.9732 | 3876.3193 |
| MF0064 | IschemicStroke      | Weighted median           | 12 | 0.9935 | 0.9282 | 1.0634   | 0.8514 | 0.0118  | 0.0156 | 0.4681 | 3.3080  | 0.9732 | 3876.3193 |
| MF0064 | IschemicStroke      | Inverse variance weighted | 12 | 0.9847 | 0.9334 | 1.0389   | 0.5729 | 0.0118  | 0.0156 | 0.4681 | 3.3080  | 0.9732 | 3876.3193 |
| MF0064 | IschemicStroke      | Simple mode               | 12 | 0.9447 | 0.8355 | 1.0682   | 0.3838 | 0.0118  | 0.0156 | 0.4681 | 3.3080  | 0.9732 | 3876.3193 |
| MF0064 | IschemicStroke      | Weighted mode             | 12 | 0.9429 | 0.8428 | 1.0549   | 0.3266 | 0.0118  | 0.0156 | 0.4681 | 3.3080  | 0.9732 | 3876.3193 |
| MF0064 | LargeArteryStroke   | MR Egger                  | 10 | 0.3912 | 0.1586 | 0.9650   | 0.0760 | 0.1291  | 0.0747 | 0.1223 | 15.4090 | 0.0803 | 15.4008   |
| MF0064 | LargeArteryStroke   | Weighted median           | 10 | 0.7846 | 0.5962 | 1.0327   | 0.0835 | 0.1291  | 0.0747 | 0.1223 | 15.4090 | 0.0803 | 15.4008   |
| MF0064 | LargeArteryStroke   | Inverse variance weighted | 10 | 0.8472 | 0.6668 | 1.0766   | 0.1750 | 0.1291  | 0.0747 | 0.1223 | 15.4090 | 0.0803 | 15.4008   |
| MF0064 | LargeArteryStroke   | Simple mode               | 10 | 0.6281 | 0.3588 | 1.0996   | 0.1380 | 0.1291  | 0.0747 | 0.1223 | 15.4090 | 0.0803 | 15.4008   |
| MF0064 | LargeArteryStroke   | Weighted mode             | 10 | 0.6578 | 0.3925 | 1.1026   | 0.1465 | 0.1291  | 0.0747 | 0.1223 | 15.4090 | 0.0803 | 15.4008   |
| MF0064 | SmallVesselStroke   | MR Egger                  | 11 | 0.8957 | 0.6195 | 1.2950   | 0.5726 | 0.0249  | 0.0313 | 0.4469 | 5.5294  | 0.7859 | 434.4584  |
| MF0064 | SmallVesselStroke   | Weighted median           | 11 | 1.0031 | 0.8856 | 1.1362   | 0.9612 | 0.0249  | 0.0313 | 0.4469 | 5.5294  | 0.7859 | 434.4584  |
| MF0064 | SmallVesselStroke   | Inverse variance weighted | 11 | 1.0346 | 0.9371 | 1.1422   | 0.5010 | 0.0249  | 0.0313 | 0.4469 | 5.5294  | 0.7859 | 434.4584  |
| MF0064 | SmallVesselStroke   | Simple mode               | 11 | 0.9573 | 0.7635 | 1.2002   | 0.7129 | 0.0249  | 0.0313 | 0.4469 | 5.5294  | 0.7859 | 434.4584  |
| MF0064 | SmallVesselStroke   | Weighted mode             | 11 | 0.9543 | 0.7768 | 1.1722   | 0.6651 | 0.0249  | 0.0313 | 0.4469 | 5.5294  | 0.7859 | 434.4584  |
| MF0064 | Stroke              | MR Egger                  | 13 | 0.9499 | 0.8194 | 1.1012   | 0.5098 | 0.0055  | 0.0129 | 0.6759 | 4.8091  | 0.9401 | 3621.9417 |
| MF0064 | Stroke              | Weighted median           | 13 | 0.9937 | 0.9383 | 1.0523   | 0.8285 | 0.0055  | 0.0129 | 0.6759 | 4.8091  | 0.9401 | 3621.9417 |
| MF0064 | Stroke              | Inverse variance weighted | 13 | 0.9797 | 0.9371 | 1.0243   | 0.3665 | 0.0055  | 0.0129 | 0.6759 | 4.8091  | 0.9401 | 3621.9417 |
| MF0064 | Stroke              | Simple mode               | 13 | 0.9340 | 0.8502 | 1.0261   | 0.1800 | 0.0055  | 0.0129 | 0.6759 | 4.8091  | 0.9401 | 3621.9417 |
| MF0064 | Stroke              | Weighted mode             | 13 | 1.0108 | 0.9255 | 1.1040   | 0.8151 | 0.0055  | 0.0129 | 0.6759 | 4.8091  | 0.9401 | 3621.9417 |
| MF0065 | CardioEmbolicStroke | MR Egger                  | 11 | 0.0008 | 0.0000 | 0.5898   | 0.0633 | 0.2075  | 0.0986 | 0.0646 | 18.0081 | 0.0548 | 11.3706   |
| MF0065 | CardioEmbolicStroke | Weighted median           | 11 | 2.3628 | 0.4375 | 12.7627  | 0.3177 | 0.2075  | 0.0986 | 0.0646 | 18.0081 | 0.0548 | 11.3706   |
| MF0065 | CardioEmbolicStroke | Inverse variance weighted | 11 | 0.8014 | 0.1471 | 4.3648   | 0.7979 | 0.2075  | 0.0986 | 0.0646 | 18.0081 | 0.0548 | 11.3706   |
| MF0065 | CardioEmbolicStroke | Simple mode               | 11 | 3.2157 | 0.2350 | 44.0045  | 0.4021 | 0.2075  | 0.0986 | 0.0646 | 18.0081 | 0.0548 | 11.3706   |
| MF0065 | CardioEmbolicStroke | Weighted mode             | 11 | 3.4443 | 0.2706 | 43.8335  | 0.3631 | 0.2075  | 0.0986 | 0.0646 | 18.0081 | 0.0548 | 11.3706   |
| MF0065 | IschemicStroke      | MR Egger                  | 13 | 0.9655 | 0.2178 | 4.2789   | 0.9639 | -0.0070 | 0.0230 | 0.7654 | 19.5999 | 0.0511 | 1.6129    |
| MF0065 | IschemicStroke      | Weighted median           | 13 | 0.6933 | 0.4543 | 1.0580   | 0.0894 | -0.0070 | 0.0230 | 0.7654 | 19.5999 | 0.0511 | 1.6129    |
| MF0065 | IschemicStroke      | Inverse variance weighted | 13 | 0.7710 | 0.5375 | 1.1060   | 0.1578 | -0.0070 | 0.0230 | 0.7654 | 19.5999 | 0.0511 | 1.6129    |
| MF0065 | IschemicStroke      | Simple mode               | 13 | 0.5217 | 0.2324 | 1.1713   | 0.1408 | -0.0070 | 0.0230 | 0.7654 | 19.5999 | 0.0511 | 1.6129    |
| MF0065 | IschemicStroke      | Weighted mode             | 13 | 0.5425 | 0.2552 | 1.1535   | 0.1380 | -0.0070 | 0.0230 | 0.7654 | 19.5999 | 0.0511 | 1.6129    |
| MF0065 | LargeArteryStroke   | MR Egger                  | 11 | 8.6903 | 0.1247 | 605.8236 | 0.3441 | -0.0725 | 0.0637 | 0.2848 | 5.7490  | 0.8359 | 1.2102    |
| MF0065 | LargeArteryStroke   | Weighted median           | 11 | 0.8905 | 0.2429 | 3.2649   | 0.8611 | -0.0725 | 0.0637 | 0.2848 | 5.7490  | 0.8359 | 1.2102    |
| MF0065 | LargeArteryStroke   | Inverse variance weighted | 11 | 0.7882 | 0.3045 | 2.0405   | 0.6238 | -0.0725 | 0.0637 | 0.2848 | 5.7490  | 0.8359 | 1.2102    |
| MF0065 | LargeArteryStroke   | Simple mode               | 11 | 1.4374 | 0.1950 | 10.5959  | 0.7292 | -0.0725 | 0.0637 | 0.2848 | 5.7490  | 0.8359 | 1.2102    |

|        |                     |                           |    |        |        |         |        |         |        |        |         |        |              |
|--------|---------------------|---------------------------|----|--------|--------|---------|--------|---------|--------|--------|---------|--------|--------------|
| MF0065 | LargeArteryStroke   | Weighted mode             | 11 | 1.1980 | 0.1575 | 9.1123  | 0.8649 | -0.0725 | 0.0637 | 0.2848 | 5.7490  | 0.8359 | 1.2102       |
| MF0065 | SmallVesselStroke   | MR Egger                  | 11 | 0.8035 | 0.0776 | 8.3216  | 0.8585 | 0.0041  | 0.0352 | 0.9093 | 7.3399  | 0.6018 | 2.4115       |
| MF0065 | SmallVesselStroke   | Weighted median           | 11 | 1.0904 | 0.5253 | 2.2634  | 0.8164 | 0.0041  | 0.0352 | 0.9093 | 7.3399  | 0.6018 | 2.4115       |
| MF0065 | SmallVesselStroke   | Inverse variance weighted | 11 | 0.9207 | 0.5436 | 1.5593  | 0.7585 | 0.0041  | 0.0352 | 0.9093 | 7.3399  | 0.6018 | 2.4115       |
| MF0065 | SmallVesselStroke   | Simple mode               | 11 | 1.2273 | 0.3874 | 3.8878  | 0.7349 | 0.0041  | 0.0352 | 0.9093 | 7.3399  | 0.6018 | 2.4115       |
| MF0065 | SmallVesselStroke   | Weighted mode             | 11 | 1.2381 | 0.3672 | 4.1743  | 0.7377 | 0.0041  | 0.0352 | 0.9093 | 7.3399  | 0.6018 | 2.4115       |
| MF0065 | Stroke              | MR Egger                  | 13 | 1.1298 | 0.3715 | 3.4364  | 0.8336 | -0.0119 | 0.0172 | 0.5049 | 14.9746 | 0.1837 | 3.1561       |
| MF0065 | Stroke              | Weighted median           | 13 | 0.7331 | 0.5194 | 1.0347  | 0.0774 | -0.0119 | 0.0172 | 0.5049 | 14.9746 | 0.1837 | 3.1561       |
| MF0065 | Stroke              | Inverse variance weighted | 13 | 0.7734 | 0.5906 | 1.0128  | 0.0618 | -0.0119 | 0.0172 | 0.5049 | 14.9746 | 0.1837 | 3.1561       |
| MF0065 | Stroke              | Simple mode               | 13 | 0.5613 | 0.2882 | 1.0932  | 0.1153 | -0.0119 | 0.0172 | 0.5049 | 14.9746 | 0.1837 | 3.1561       |
| MF0065 | Stroke              | Weighted mode             | 13 | 0.5797 | 0.2895 | 1.1608  | 0.1497 | -0.0119 | 0.0172 | 0.5049 | 14.9746 | 0.1837 | 3.1561       |
| MF0066 | CardioEmbolicStroke | MR Egger                  | 9  | 0.8631 | 0.3090 | 2.4106  | 0.7868 | 0.0233  | 0.0676 | 0.7407 | 5.6857  | 0.5769 | 9.6392       |
| MF0066 | CardioEmbolicStroke | Weighted median           | 9  | 1.0375 | 0.6706 | 1.6050  | 0.8688 | 0.0233  | 0.0676 | 0.7407 | 5.6857  | 0.5769 | 9.6392       |
| MF0066 | CardioEmbolicStroke | Inverse variance weighted | 9  | 1.0236 | 0.7323 | 1.4307  | 0.8914 | 0.0233  | 0.0676 | 0.7407 | 5.6857  | 0.5769 | 9.6392       |
| MF0066 | CardioEmbolicStroke | Simple mode               | 9  | 1.2079 | 0.6091 | 2.3952  | 0.6035 | 0.0233  | 0.0676 | 0.7407 | 5.6857  | 0.5769 | 9.6392       |
| MF0066 | CardioEmbolicStroke | Weighted mode             | 9  | 1.0159 | 0.5354 | 1.9276  | 0.9626 | 0.0233  | 0.0676 | 0.7407 | 5.6857  | 0.5769 | 9.6392       |
| MF0066 | IschemicStroke      | MR Egger                  | 18 | 1.1220 | 1.0210 | 1.2330  | 0.0293 | -0.0123 | 0.0089 | 0.1887 | 9.2926  | 0.9306 | -1485.5237   |
| MF0066 | IschemicStroke      | Weighted median           | 18 | 1.0450 | 0.9764 | 1.1184  | 0.2037 | -0.0123 | 0.0089 | 0.1887 | 9.2926  | 0.9306 | -1485.5237   |
| MF0066 | IschemicStroke      | Inverse variance weighted | 18 | 1.0603 | 1.0098 | 1.1134  | 0.0186 | -0.0123 | 0.0089 | 0.1887 | 9.2926  | 0.9306 | -1485.5237   |
| MF0066 | IschemicStroke      | Simple mode               | 18 | 1.0344 | 0.9350 | 1.1444  | 0.5206 | -0.0123 | 0.0089 | 0.1887 | 9.2926  | 0.9306 | -1485.5237   |
| MF0066 | IschemicStroke      | Weighted mode             | 18 | 1.0367 | 0.9397 | 1.1437  | 0.4819 | -0.0123 | 0.0089 | 0.1887 | 9.2926  | 0.9306 | -1485.5237   |
| MF0066 | LargeArteryStroke   | MR Egger                  | 16 | 0.8260 | 0.5327 | 1.2807  | 0.4073 | 0.0342  | 0.0401 | 0.4088 | 25.3546 | 0.0312 | 87459.6312   |
| MF0066 | LargeArteryStroke   | Weighted median           | 16 | 1.1918 | 0.9086 | 1.5632  | 0.2049 | 0.0342  | 0.0401 | 0.4088 | 25.3546 | 0.0312 | 87459.6312   |
| MF0066 | LargeArteryStroke   | Inverse variance weighted | 16 | 0.9733 | 0.7804 | 1.2139  | 0.8102 | 0.0342  | 0.0401 | 0.4088 | 25.3546 | 0.0312 | 87459.6312   |
| MF0066 | LargeArteryStroke   | Simple mode               | 16 | 1.2648 | 0.7703 | 2.0768  | 0.3679 | 0.0342  | 0.0401 | 0.4088 | 25.3546 | 0.0312 | 87459.6312   |
| MF0066 | LargeArteryStroke   | Weighted mode             | 16 | 1.2203 | 0.7239 | 2.0570  | 0.4664 | 0.0342  | 0.0401 | 0.4088 | 25.3546 | 0.0312 | 87459.6312   |
| MF0066 | SmallVesselStroke   | MR Egger                  | 16 | 1.1024 | 0.9172 | 1.3251  | 0.3164 | -0.0157 | 0.0167 | 0.3627 | 10.5944 | 0.7176 | 749478.3402  |
| MF0066 | SmallVesselStroke   | Weighted median           | 16 | 1.0622 | 0.9389 | 1.2018  | 0.3375 | -0.0157 | 0.0167 | 0.3627 | 10.5944 | 0.7176 | 749478.3402  |
| MF0066 | SmallVesselStroke   | Inverse variance weighted | 16 | 1.0214 | 0.9312 | 1.1204  | 0.6535 | -0.0157 | 0.0167 | 0.3627 | 10.5944 | 0.7176 | 749478.3402  |
| MF0066 | SmallVesselStroke   | Simple mode               | 16 | 1.0623 | 0.8722 | 1.2939  | 0.5567 | -0.0157 | 0.0167 | 0.3627 | 10.5944 | 0.7176 | 749478.3402  |
| MF0066 | SmallVesselStroke   | Weighted mode             | 16 | 1.0467 | 0.8963 | 1.2223  | 0.5726 | -0.0157 | 0.0167 | 0.3627 | 10.5944 | 0.7176 | 749478.3402  |
| MF0066 | Stroke              | MR Egger                  | 17 | 1.0768 | 0.9764 | 1.1875  | 0.1590 | -0.0090 | 0.0084 | 0.2993 | 11.7690 | 0.7597 | -255527.1660 |
| MF0066 | Stroke              | Weighted median           | 17 | 1.0480 | 0.9822 | 1.1183  | 0.1564 | -0.0090 | 0.0084 | 0.2993 | 11.7690 | 0.7597 | -255527.1660 |
| MF0066 | Stroke              | Inverse variance weighted | 17 | 1.0276 | 0.9795 | 1.0780  | 0.2661 | -0.0090 | 0.0084 | 0.2993 | 11.7690 | 0.7597 | -255527.1660 |
| MF0066 | Stroke              | Simple mode               | 17 | 1.0473 | 0.9400 | 1.1670  | 0.4143 | -0.0090 | 0.0084 | 0.2993 | 11.7690 | 0.7597 | -255527.1660 |
| MF0066 | Stroke              | Weighted mode             | 17 | 1.0488 | 0.9526 | 1.1548  | 0.3458 | -0.0090 | 0.0084 | 0.2993 | 11.7690 | 0.7597 | -255527.1660 |
| MF0067 | CardioEmbolicStroke | MR Egger                  | 8  | 1.1281 | 0.1199 | 10.6152 | 0.9195 | 0.0174  | 0.0444 | 0.7091 | 4.8559  | 0.5624 | 1.4211       |
| MF0067 | CardioEmbolicStroke | Weighted median           | 8  | 1.6678 | 0.3261 | 8.5289  | 0.5390 | 0.0174  | 0.0444 | 0.7091 | 4.8559  | 0.5624 | 1.4211       |
| MF0067 | CardioEmbolicStroke | Inverse variance weighted | 8  | 1.6466 | 0.4963 | 5.4630  | 0.4150 | 0.0174  | 0.0444 | 0.7091 | 4.8559  | 0.5624 | 1.4211       |
| MF0067 | CardioEmbolicStroke | Simple mode               | 8  | 0.6556 | 0.0500 | 8.5910  | 0.7571 | 0.0174  | 0.0444 | 0.7091 | 4.8559  | 0.5624 | 1.4211       |
| MF0067 | CardioEmbolicStroke | Weighted mode             | 8  | 1.3727 | 0.1972 | 9.5573  | 0.7583 | 0.0174  | 0.0444 | 0.7091 | 4.8559  | 0.5624 | 1.4211       |
| MF0067 | IschemicStroke      | MR Egger                  | 28 | 1.0949 | 0.8793 | 1.3634  | 0.4250 | -0.0118 | 0.0072 | 0.1126 | 18.5103 | 0.8872 | 41.0515      |
| MF0067 | IschemicStroke      | Weighted median           | 28 | 0.8877 | 0.7284 | 1.0818  | 0.2378 | -0.0118 | 0.0072 | 0.1126 | 18.5103 | 0.8872 | 41.0515      |
| MF0067 | IschemicStroke      | Inverse variance weighted | 28 | 0.9496 | 0.8267 | 1.0909  | 0.4649 | -0.0118 | 0.0072 | 0.1126 | 18.5103 | 0.8872 | 41.0515      |
| MF0067 | IschemicStroke      | Simple mode               | 28 | 0.9509 | 0.6432 | 1.4059  | 0.8028 | -0.0118 | 0.0072 | 0.1126 | 18.5103 | 0.8872 | 41.0515      |
| MF0067 | IschemicStroke      | Weighted mode             | 28 | 0.8780 | 0.6256 | 1.2321  | 0.4582 | -0.0118 | 0.0072 | 0.1126 | 18.5103 | 0.8872 | 41.0515      |
| MF0067 | LargeArteryStroke   | MR Egger                  | 13 | 1.0804 | 0.3561 | 3.2780  | 0.8939 | -0.0049 | 0.0280 | 0.8633 | 10.0996 | 0.5214 | 1.4055       |
| MF0067 | LargeArteryStroke   | Weighted median           | 13 | 1.1336 | 0.4480 | 2.8689  | 0.7912 | -0.0049 | 0.0280 | 0.8633 | 10.0996 | 0.5214 | 1.4055       |
| MF0067 | LargeArteryStroke   | Inverse variance weighted | 13 | 0.9973 | 0.5134 | 1.9371  | 0.9936 | -0.0049 | 0.0280 | 0.8633 | 10.0996 | 0.5214 | 1.4055       |
| MF0067 | LargeArteryStroke   | Simple mode               | 13 | 1.5319 | 0.3871 | 6.0625  | 0.5547 | -0.0049 | 0.0280 | 0.8633 | 10.0996 | 0.5214 | 1.4055       |
| MF0067 | LargeArteryStroke   | Weighted mode             | 13 | 1.0072 | 0.3202 | 3.1683  | 0.9904 | -0.0049 | 0.0280 | 0.8633 | 10.0996 | 0.5214 | 1.4055       |
| MF0067 | SmallVesselStroke   | MR Egger                  | 15 | 1.3901 | 0.7885 | 2.4508  | 0.2754 | -0.0297 | 0.0151 | 0.0714 | 8.7198  | 0.8486 | 10.9851      |
| MF0067 | SmallVesselStroke   | Weighted median           | 15 | 0.7976 | 0.4899 | 1.2985  | 0.3631 | -0.0297 | 0.0151 | 0.0714 | 8.7198  | 0.8486 | 10.9851      |

|        |                     |                           |    |        |        |           |        |         |        |        |         |        |            |
|--------|---------------------|---------------------------|----|--------|--------|-----------|--------|---------|--------|--------|---------|--------|------------|
| MF0067 | SmallVesselStroke   | Inverse variance weighted | 15 | 0.8853 | 0.6275 | 1.2492    | 0.4881 | -0.0297 | 0.0151 | 0.0714 | 8.7198  | 0.8486 | 10.9851    |
| MF0067 | SmallVesselStroke   | Simple mode               | 15 | 0.7633 | 0.3591 | 1.6225    | 0.4942 | -0.0297 | 0.0151 | 0.0714 | 8.7198  | 0.8486 | 10.9851    |
| MF0067 | SmallVesselStroke   | Weighted mode             | 15 | 0.7500 | 0.3571 | 1.5752    | 0.4599 | -0.0297 | 0.0151 | 0.0714 | 8.7198  | 0.8486 | 10.9851    |
| MF0067 | Stroke              | MR Egger                  | 25 | 0.9978 | 0.7802 | 1.2760    | 0.9861 | -0.0059 | 0.0064 | 0.3660 | 22.7614 | 0.4748 | 17.4354    |
| MF0067 | Stroke              | Weighted median           | 25 | 0.8194 | 0.6609 | 1.0158    | 0.0692 | -0.0059 | 0.0064 | 0.3660 | 22.7614 | 0.4748 | 17.4354    |
| MF0067 | Stroke              | Inverse variance weighted | 25 | 0.9100 | 0.7841 | 1.0562    | 0.2149 | -0.0059 | 0.0064 | 0.3660 | 22.7614 | 0.4748 | 17.4354    |
| MF0067 | Stroke              | Simple mode               | 25 | 0.7861 | 0.5217 | 1.1847    | 0.2615 | -0.0059 | 0.0064 | 0.3660 | 22.7614 | 0.4748 | 17.4354    |
| MF0067 | Stroke              | Weighted mode             | 25 | 0.7907 | 0.5429 | 1.1517    | 0.2329 | -0.0059 | 0.0064 | 0.3660 | 22.7614 | 0.4748 | 17.4354    |
| MF0068 | CardioEmbolicStroke | MR Egger                  | 10 | 5.4390 | 0.0175 | 1687.6726 | 0.5788 | -0.0558 | 0.0758 | 0.4827 | 9.8174  | 0.2781 | 9.0470     |
| MF0068 | CardioEmbolicStroke | Weighted median           | 10 | 0.5899 | 0.0783 | 4.4448    | 0.6085 | -0.0558 | 0.0758 | 0.4827 | 9.8174  | 0.2781 | 9.0470     |
| MF0068 | CardioEmbolicStroke | Inverse variance weighted | 10 | 0.6927 | 0.1354 | 3.5435    | 0.6593 | -0.0558 | 0.0758 | 0.4827 | 9.8174  | 0.2781 | 9.0470     |
| MF0068 | CardioEmbolicStroke | Simple mode               | 10 | 0.3619 | 0.0119 | 11.0038   | 0.5740 | -0.0558 | 0.0758 | 0.4827 | 9.8174  | 0.2781 | 9.0470     |
| MF0068 | CardioEmbolicStroke | Weighted mode             | 10 | 0.4611 | 0.0220 | 9.6704    | 0.6300 | -0.0558 | 0.0758 | 0.4827 | 9.8174  | 0.2781 | 9.0470     |
| MF0068 | IschemicStroke      | MR Egger                  | 18 | 1.0588 | 0.6406 | 1.7498    | 0.8265 | -0.0062 | 0.0087 | 0.4845 | 5.7152  | 0.9909 | 6.2816     |
| MF0068 | IschemicStroke      | Weighted median           | 18 | 1.0029 | 0.7160 | 1.4048    | 0.9865 | -0.0062 | 0.0087 | 0.4845 | 5.7152  | 0.9909 | 6.2816     |
| MF0068 | IschemicStroke      | Inverse variance weighted | 18 | 0.9033 | 0.7023 | 1.1619    | 0.4286 | -0.0062 | 0.0087 | 0.4845 | 5.7152  | 0.9909 | 6.2816     |
| MF0068 | IschemicStroke      | Simple mode               | 18 | 1.0092 | 0.5806 | 1.7540    | 0.9746 | -0.0062 | 0.0087 | 0.4845 | 5.7152  | 0.9909 | 6.2816     |
| MF0068 | IschemicStroke      | Weighted mode             | 18 | 1.0216 | 0.6266 | 1.6656    | 0.9326 | -0.0062 | 0.0087 | 0.4845 | 5.7152  | 0.9909 | 6.2816     |
| MF0068 | LargeArteryStroke   | MR Egger                  | 14 | 0.2226 | 0.0207 | 2.3928    | 0.2387 | 0.0507  | 0.0365 | 0.1896 | 15.3344 | 0.2869 | 3.5449     |
| MF0068 | LargeArteryStroke   | Weighted median           | 14 | 1.1433 | 0.2947 | 4.4355    | 0.8465 | 0.0507  | 0.0365 | 0.1896 | 15.3344 | 0.2869 | 3.5449     |
| MF0068 | LargeArteryStroke   | Inverse variance weighted | 14 | 1.0328 | 0.3741 | 2.8512    | 0.9503 | 0.0507  | 0.0365 | 0.1896 | 15.3344 | 0.2869 | 3.5449     |
| MF0068 | LargeArteryStroke   | Simple mode               | 14 | 1.2436 | 0.1461 | 10.5878   | 0.8449 | 0.0507  | 0.0365 | 0.1896 | 15.3344 | 0.2869 | 3.5449     |
| MF0068 | LargeArteryStroke   | Weighted mode             | 14 | 1.0658 | 0.1253 | 9.0686    | 0.9544 | 0.0507  | 0.0365 | 0.1896 | 15.3344 | 0.2869 | 3.5449     |
| MF0068 | SmallVesselStroke   | MR Egger                  | 15 | 1.5614 | 0.5499 | 4.4338    | 0.4178 | -0.0175 | 0.0169 | 0.3204 | 12.4077 | 0.5736 | 1.2994     |
| MF0068 | SmallVesselStroke   | Weighted median           | 15 | 0.9265 | 0.4652 | 1.8453    | 0.8281 | -0.0175 | 0.0169 | 0.3204 | 12.4077 | 0.5736 | 1.2994     |
| MF0068 | SmallVesselStroke   | Inverse variance weighted | 15 | 0.9606 | 0.5886 | 1.5677    | 0.8723 | -0.0175 | 0.0169 | 0.3204 | 12.4077 | 0.5736 | 1.2994     |
| MF0068 | SmallVesselStroke   | Simple mode               | 15 | 0.8788 | 0.2457 | 3.1431    | 0.8454 | -0.0175 | 0.0169 | 0.3204 | 12.4077 | 0.5736 | 1.2994     |
| MF0068 | SmallVesselStroke   | Weighted mode             | 15 | 0.7867 | 0.2000 | 3.0953    | 0.7365 | -0.0175 | 0.0169 | 0.3204 | 12.4077 | 0.5736 | 1.2994     |
| MF0068 | Stroke              | MR Egger                  | 22 | 0.8108 | 0.5327 | 1.2340    | 0.3394 | -0.0005 | 0.0072 | 0.9485 | 10.3895 | 0.9605 | 6.2695     |
| MF0068 | Stroke              | Weighted median           | 22 | 0.7961 | 0.6022 | 1.0525    | 0.1095 | -0.0005 | 0.0072 | 0.9485 | 10.3895 | 0.9605 | 6.2695     |
| MF0068 | Stroke              | Inverse variance weighted | 22 | 0.8010 | 0.6509 | 0.9856    | 0.0360 | -0.0005 | 0.0072 | 0.9485 | 10.3895 | 0.9605 | 6.2695     |
| MF0068 | Stroke              | Simple mode               | 22 | 0.7437 | 0.4713 | 1.1734    | 0.2170 | -0.0005 | 0.0072 | 0.9485 | 10.3895 | 0.9605 | 6.2695     |
| MF0068 | Stroke              | Weighted mode             | 22 | 0.7672 | 0.5103 | 1.1536    | 0.2168 | -0.0005 | 0.0072 | 0.9485 | 10.3895 | 0.9605 | 6.2695     |
| MF0069 | CardioEmbolicStroke | MR Egger                  | 16 | 1.0901 | 0.7454 | 1.5942    | 0.6632 | -0.0271 | 0.0382 | 0.4892 | 9.7314  | 0.7815 | -1332.9061 |
| MF0069 | CardioEmbolicStroke | Weighted median           | 16 | 0.9966 | 0.7684 | 1.2926    | 0.9795 | -0.0271 | 0.0382 | 0.4892 | 9.7314  | 0.7815 | -1332.9061 |
| MF0069 | CardioEmbolicStroke | Inverse variance weighted | 16 | 0.9660 | 0.8049 | 1.1594    | 0.7103 | -0.0271 | 0.0382 | 0.4892 | 9.7314  | 0.7815 | -1332.9061 |
| MF0069 | CardioEmbolicStroke | Simple mode               | 16 | 0.9701 | 0.6435 | 1.4623    | 0.8865 | -0.0271 | 0.0382 | 0.4892 | 9.7314  | 0.7815 | -1332.9061 |
| MF0069 | CardioEmbolicStroke | Weighted mode             | 16 | 0.9820 | 0.6862 | 1.4052    | 0.9220 | -0.0271 | 0.0382 | 0.4892 | 9.7314  | 0.7815 | -1332.9061 |
| MF0069 | IschemicStroke      | MR Egger                  | 19 | 1.0184 | 0.9355 | 1.1086    | 0.6796 | -0.0060 | 0.0095 | 0.5393 | 25.6669 | 0.0807 | -240.8520  |
| MF0069 | IschemicStroke      | Weighted median           | 19 | 1.0196 | 0.9649 | 1.0773    | 0.4907 | -0.0060 | 0.0095 | 0.5393 | 25.6669 | 0.0807 | -240.8520  |
| MF0069 | IschemicStroke      | Inverse variance weighted | 19 | 0.9953 | 0.9519 | 1.0407    | 0.8354 | -0.0060 | 0.0095 | 0.5393 | 25.6669 | 0.0807 | -240.8520  |
| MF0069 | IschemicStroke      | Simple mode               | 19 | 1.0249 | 0.9255 | 1.1351    | 0.6418 | -0.0060 | 0.0095 | 0.5393 | 25.6669 | 0.0807 | -240.8520  |
| MF0069 | IschemicStroke      | Weighted mode             | 19 | 1.0346 | 0.9570 | 1.1186    | 0.4038 | -0.0060 | 0.0095 | 0.5393 | 25.6669 | 0.0807 | -240.8520  |
| MF0069 | LargeArteryStroke   | MR Egger                  | 17 | 1.2733 | 0.9558 | 1.6962    | 0.1194 | -0.0523 | 0.0289 | 0.0898 | 17.7631 | 0.3380 | -735.0114  |
| MF0069 | LargeArteryStroke   | Weighted median           | 17 | 1.0813 | 0.8910 | 1.3122    | 0.4285 | -0.0523 | 0.0289 | 0.0898 | 17.7631 | 0.3380 | -735.0114  |
| MF0069 | LargeArteryStroke   | Inverse variance weighted | 17 | 1.0076 | 0.8739 | 1.1618    | 0.9170 | -0.0523 | 0.0289 | 0.0898 | 17.7631 | 0.3380 | -735.0114  |
| MF0069 | LargeArteryStroke   | Simple mode               | 17 | 1.0887 | 0.7503 | 1.5798    | 0.6606 | -0.0523 | 0.0289 | 0.0898 | 17.7631 | 0.3380 | -735.0114  |
| MF0069 | LargeArteryStroke   | Weighted mode             | 17 | 1.1324 | 0.8403 | 1.5258    | 0.4260 | -0.0523 | 0.0289 | 0.0898 | 17.7631 | 0.3380 | -735.0114  |
| MF0069 | SmallVesselStroke   | MR Egger                  | 17 | 1.1806 | 1.0115 | 1.3780    | 0.0525 | -0.0394 | 0.0158 | 0.0246 | 16.6135 | 0.4110 | -2290.0901 |
| MF0069 | SmallVesselStroke   | Weighted median           | 17 | 1.0316 | 0.9257 | 1.1497    | 0.5729 | -0.0394 | 0.0158 | 0.0246 | 16.6135 | 0.4110 | -2290.0901 |
| MF0069 | SmallVesselStroke   | Inverse variance weighted | 17 | 0.9930 | 0.9210 | 1.0706    | 0.8552 | -0.0394 | 0.0158 | 0.0246 | 16.6135 | 0.4110 | -2290.0901 |
| MF0069 | SmallVesselStroke   | Simple mode               | 17 | 1.0336 | 0.8542 | 1.2508    | 0.7384 | -0.0394 | 0.0158 | 0.0246 | 16.6135 | 0.4110 | -2290.0901 |
| MF0069 | SmallVesselStroke   | Weighted mode             | 17 | 1.0767 | 0.9067 | 1.2786    | 0.4118 | -0.0394 | 0.0158 | 0.0246 | 16.6135 | 0.4110 | -2290.0901 |

|        |                     |                           |    |        |        |            |        |         |        |        |         |        |             |
|--------|---------------------|---------------------------|----|--------|--------|------------|--------|---------|--------|--------|---------|--------|-------------|
| MF0069 | Stroke              | MR Egger                  | 18 | 1.0448 | 0.9559 | 1.1420     | 0.3489 | -0.0109 | 0.0092 | 0.2544 | 28.4076 | 0.0404 | -707.5649   |
| MF0069 | Stroke              | Weighted median           | 18 | 1.0191 | 0.9654 | 1.0758     | 0.4929 | -0.0109 | 0.0092 | 0.2544 | 28.4076 | 0.0404 | -707.5649   |
| MF0069 | Stroke              | Inverse variance weighted | 18 | 0.9971 | 0.9538 | 1.0424     | 0.8991 | -0.0109 | 0.0092 | 0.2544 | 28.4076 | 0.0404 | -707.5649   |
| MF0069 | Stroke              | Simple mode               | 18 | 1.0400 | 0.9379 | 1.1532     | 0.4672 | -0.0109 | 0.0092 | 0.2544 | 28.4076 | 0.0404 | -707.5649   |
| MF0069 | Stroke              | Weighted mode             | 18 | 1.0400 | 0.9616 | 1.1248     | 0.3406 | -0.0109 | 0.0092 | 0.2544 | 28.4076 | 0.0404 | -707.5649   |
| MF0070 | CardioEmbolicStroke | MR Egger                  | 8  | 2.7245 | 0.7958 | 9.3268     | 0.1615 | -0.2343 | 0.1268 | 0.1141 | 11.8414 | 0.1059 | 24.2439     |
| MF0070 | CardioEmbolicStroke | Weighted median           | 8  | 0.9443 | 0.6676 | 1.3356     | 0.7459 | -0.2343 | 0.1268 | 0.1141 | 11.8414 | 0.1059 | 24.2439     |
| MF0070 | CardioEmbolicStroke | Inverse variance weighted | 8  | 0.8777 | 0.6436 | 1.1968     | 0.4095 | -0.2343 | 0.1268 | 0.1141 | 11.8414 | 0.1059 | 24.2439     |
| MF0070 | CardioEmbolicStroke | Simple mode               | 8  | 1.2414 | 0.6199 | 2.4864     | 0.5609 | -0.2343 | 0.1268 | 0.1141 | 11.8414 | 0.1059 | 24.2439     |
| MF0070 | CardioEmbolicStroke | Weighted mode             | 8  | 1.2414 | 0.6543 | 2.3554     | 0.5292 | -0.2343 | 0.1268 | 0.1141 | 11.8414 | 0.1059 | 24.2439     |
| MF0070 | IschemicStroke      | MR Egger                  | 11 | 0.9654 | 0.8303 | 1.1225     | 0.6580 | -0.0057 | 0.0170 | 0.7457 | 9.3028  | 0.4098 | -11514.2422 |
| MF0070 | IschemicStroke      | Weighted median           | 11 | 0.9672 | 0.9029 | 1.0361     | 0.3422 | -0.0057 | 0.0170 | 0.7457 | 9.3028  | 0.4098 | -11514.2422 |
| MF0070 | IschemicStroke      | Inverse variance weighted | 11 | 0.9423 | 0.8970 | 0.9898     | 0.0178 | -0.0057 | 0.0170 | 0.7457 | 9.3028  | 0.4098 | -11514.2422 |
| MF0070 | IschemicStroke      | Simple mode               | 11 | 0.8966 | 0.7954 | 1.0106     | 0.1042 | -0.0057 | 0.0170 | 0.7457 | 9.3028  | 0.4098 | -11514.2422 |
| MF0070 | IschemicStroke      | Weighted mode             | 11 | 0.9998 | 0.9045 | 1.1051     | 0.9968 | -0.0057 | 0.0170 | 0.7457 | 9.3028  | 0.4098 | -11514.2422 |
| MF0070 | LargeArteryStroke   | MR Egger                  | 9  | 1.2927 | 0.7044 | 2.3723     | 0.4346 | -0.0544 | 0.0657 | 0.4349 | 7.6212  | 0.3672 | 190.2292    |
| MF0070 | LargeArteryStroke   | Weighted median           | 9  | 1.1135 | 0.8953 | 1.3848     | 0.3341 | -0.0544 | 0.0657 | 0.4349 | 7.6212  | 0.3672 | 190.2292    |
| MF0070 | LargeArteryStroke   | Inverse variance weighted | 9  | 1.0114 | 0.8506 | 1.2025     | 0.8983 | -0.0544 | 0.0657 | 0.4349 | 7.6212  | 0.3672 | 190.2292    |
| MF0070 | LargeArteryStroke   | Simple mode               | 9  | 1.1021 | 0.8112 | 1.4972     | 0.5515 | -0.0544 | 0.0657 | 0.4349 | 7.6212  | 0.3672 | 190.2292    |
| MF0070 | LargeArteryStroke   | Weighted mode             | 9  | 1.1021 | 0.8284 | 1.4662     | 0.5234 | -0.0544 | 0.0657 | 0.4349 | 7.6212  | 0.3672 | 190.2292    |
| MF0070 | SmallVesselStroke   | MR Egger                  | 9  | 1.2337 | 0.8955 | 1.6997     | 0.2397 | -0.0624 | 0.0348 | 0.1159 | 10.0054 | 0.2646 | 669.0766    |
| MF0070 | SmallVesselStroke   | Weighted median           | 9  | 0.9281 | 0.8118 | 1.0610     | 0.2746 | -0.0624 | 0.0348 | 0.1159 | 10.0054 | 0.2646 | 669.0766    |
| MF0070 | SmallVesselStroke   | Inverse variance weighted | 9  | 0.9320 | 0.8392 | 1.0351     | 0.1884 | -0.0624 | 0.0348 | 0.1159 | 10.0054 | 0.2646 | 669.0766    |
| MF0070 | SmallVesselStroke   | Simple mode               | 9  | 0.8383 | 0.6558 | 1.0716     | 0.1968 | -0.0624 | 0.0348 | 0.1159 | 10.0054 | 0.2646 | 669.0766    |
| MF0070 | SmallVesselStroke   | Weighted mode             | 9  | 0.9377 | 0.7415 | 1.1859     | 0.6060 | -0.0624 | 0.0348 | 0.1159 | 10.0054 | 0.2646 | 669.0766    |
| MF0070 | Stroke              | MR Egger                  | 12 | 0.9792 | 0.8639 | 1.1099     | 0.7491 | -0.0067 | 0.0143 | 0.6495 | 9.1751  | 0.5156 | -4377.6418  |
| MF0070 | Stroke              | Weighted median           | 12 | 0.9552 | 0.9009 | 1.0127     | 0.1243 | -0.0067 | 0.0143 | 0.6495 | 9.1751  | 0.5156 | -4377.6418  |
| MF0070 | Stroke              | Inverse variance weighted | 12 | 0.9520 | 0.9131 | 0.9925     | 0.0207 | -0.0067 | 0.0143 | 0.6495 | 9.1751  | 0.5156 | -4377.6418  |
| MF0070 | Stroke              | Simple mode               | 12 | 0.9115 | 0.8223 | 1.0104     | 0.1058 | -0.0067 | 0.0143 | 0.6495 | 9.1751  | 0.5156 | -4377.6418  |
| MF0070 | Stroke              | Weighted mode             | 12 | 0.9262 | 0.8328 | 1.0301     | 0.1851 | -0.0067 | 0.0143 | 0.6495 | 9.1751  | 0.5156 | -4377.6418  |
| MF0071 | CardioEmbolicStroke | MR Egger                  | 7  | 0.0609 | 0.0000 | 66252.6991 | 0.7094 | 0.0337  | 0.1381 | 0.8170 | 0.8730  | 0.9721 | 2.4629      |
| MF0071 | CardioEmbolicStroke | Weighted median           | 7  | 0.2184 | 0.0135 | 3.5432     | 0.2845 | 0.0337  | 0.1381 | 0.8170 | 0.8730  | 0.9721 | 2.4629      |
| MF0071 | CardioEmbolicStroke | Inverse variance weighted | 7  | 0.3359 | 0.0365 | 3.0938     | 0.3355 | 0.0337  | 0.1381 | 0.8170 | 0.8730  | 0.9721 | 2.4629      |
| MF0071 | CardioEmbolicStroke | Simple mode               | 7  | 0.1702 | 0.0045 | 6.4697     | 0.3769 | 0.0337  | 0.1381 | 0.8170 | 0.8730  | 0.9721 | 2.4629      |
| MF0071 | CardioEmbolicStroke | Weighted mode             | 7  | 0.1903 | 0.0044 | 8.3153     | 0.4223 | 0.0337  | 0.1381 | 0.8170 | 0.8730  | 0.9721 | 2.4629      |
| MF0071 | IschemicStroke      | MR Egger                  | 11 | 0.6684 | 0.3224 | 1.3855     | 0.3068 | 0.0059  | 0.0107 | 0.5950 | 14.8697 | 0.0946 | 1.8839      |
| MF0071 | IschemicStroke      | Weighted median           | 11 | 0.7855 | 0.4917 | 1.2548     | 0.3123 | 0.0059  | 0.0107 | 0.5950 | 14.8697 | 0.0946 | 1.8839      |
| MF0071 | IschemicStroke      | Inverse variance weighted | 11 | 0.7893 | 0.5234 | 1.1904     | 0.2590 | 0.0059  | 0.0107 | 0.5950 | 14.8697 | 0.0946 | 1.8839      |
| MF0071 | IschemicStroke      | Simple mode               | 11 | 0.8404 | 0.4026 | 1.7544     | 0.6533 | 0.0059  | 0.0107 | 0.5950 | 14.8697 | 0.0946 | 1.8839      |
| MF0071 | IschemicStroke      | Weighted mode             | 11 | 0.7747 | 0.4722 | 1.2711     | 0.3361 | 0.0059  | 0.0107 | 0.5950 | 14.8697 | 0.0946 | 1.8839      |
| MF0071 | LargeArteryStroke   | MR Egger                  | 9  | 0.3005 | 0.0322 | 2.8037     | 0.3264 | 0.0278  | 0.0298 | 0.3812 | 7.3567  | 0.3927 | 2.5592      |
| MF0071 | LargeArteryStroke   | Weighted median           | 9  | 0.3093 | 0.0559 | 1.7097     | 0.1786 | 0.0278  | 0.0298 | 0.3812 | 7.3567  | 0.3927 | 2.5592      |
| MF0071 | LargeArteryStroke   | Inverse variance weighted | 9  | 0.7296 | 0.2142 | 2.4848     | 0.6141 | 0.0278  | 0.0298 | 0.3812 | 7.3567  | 0.3927 | 2.5592      |
| MF0071 | LargeArteryStroke   | Simple mode               | 9  | 0.3241 | 0.0159 | 6.6018     | 0.4846 | 0.0278  | 0.0298 | 0.3812 | 7.3567  | 0.3927 | 2.5592      |
| MF0071 | LargeArteryStroke   | Weighted mode             | 9  | 0.3241 | 0.0552 | 1.9038     | 0.2476 | 0.0278  | 0.0298 | 0.3812 | 7.3567  | 0.3927 | 2.5592      |
| MF0071 | SmallVesselStroke   | MR Egger                  | 9  | 0.9000 | 0.2257 | 3.5889     | 0.8855 | -0.0118 | 0.0186 | 0.5461 | 9.3682  | 0.2273 | 2.1199      |
| MF0071 | SmallVesselStroke   | Weighted median           | 9  | 0.7362 | 0.2890 | 1.8753     | 0.5209 | -0.0118 | 0.0186 | 0.5461 | 9.3682  | 0.2273 | 2.1199      |
| MF0071 | SmallVesselStroke   | Inverse variance weighted | 9  | 0.6201 | 0.2965 | 1.2969     | 0.2043 | -0.0118 | 0.0186 | 0.5461 | 9.3682  | 0.2273 | 2.1199      |
| MF0071 | SmallVesselStroke   | Simple mode               | 9  | 0.2939 | 0.0593 | 1.4564     | 0.1721 | -0.0118 | 0.0186 | 0.5461 | 9.3682  | 0.2273 | 2.1199      |
| MF0071 | SmallVesselStroke   | Weighted mode             | 9  | 0.8715 | 0.3506 | 2.1666     | 0.7748 | -0.0118 | 0.0186 | 0.5461 | 9.3682  | 0.2273 | 2.1199      |
| MF0071 | Stroke              | MR Egger                  | 11 | 0.7728 | 0.3955 | 1.5101     | 0.4700 | 0.0043  | 0.0095 | 0.6577 | 14.7631 | 0.0977 | 2.5415      |
| MF0071 | Stroke              | Weighted median           | 11 | 0.9376 | 0.6036 | 1.4565     | 0.7745 | 0.0043  | 0.0095 | 0.6577 | 14.7631 | 0.0977 | 2.5415      |
| MF0071 | Stroke              | Inverse variance weighted | 11 | 0.8796 | 0.6128 | 1.2625     | 0.4867 | 0.0043  | 0.0095 | 0.6577 | 14.7631 | 0.0977 | 2.5415      |

|        |                     |                           |    |        |        |         |        |         |        |        |         |        |            |
|--------|---------------------|---------------------------|----|--------|--------|---------|--------|---------|--------|--------|---------|--------|------------|
| MF0071 | Stroke              | Simple mode               | 11 | 0.8234 | 0.4090 | 1.6576  | 0.5981 | 0.0043  | 0.0095 | 0.6577 | 14.7631 | 0.0977 | 2.5415     |
| MF0071 | Stroke              | Weighted mode             | 11 | 0.9508 | 0.5805 | 1.5573  | 0.8452 | 0.0043  | 0.0095 | 0.6577 | 14.7631 | 0.0977 | 2.5415     |
| MF0072 | CardioEmbolicStroke | MR Egger                  | 15 | 0.9862 | 0.6438 | 1.5106  | 0.9499 | 0.0060  | 0.0406 | 0.8840 | 10.5329 | 0.6499 | 575.0931   |
| MF0072 | CardioEmbolicStroke | Weighted median           | 15 | 0.9971 | 0.7799 | 1.2749  | 0.9818 | 0.0060  | 0.0406 | 0.8840 | 10.5329 | 0.6499 | 575.0931   |
| MF0072 | CardioEmbolicStroke | Inverse variance weighted | 15 | 1.0157 | 0.8535 | 1.2088  | 0.8604 | 0.0060  | 0.0406 | 0.8840 | 10.5329 | 0.6499 | 575.0931   |
| MF0072 | CardioEmbolicStroke | Simple mode               | 15 | 0.9599 | 0.6518 | 1.4137  | 0.8390 | 0.0060  | 0.0406 | 0.8840 | 10.5329 | 0.6499 | 575.0931   |
| MF0072 | CardioEmbolicStroke | Weighted mode             | 15 | 0.9934 | 0.7373 | 1.3384  | 0.9657 | 0.0060  | 0.0406 | 0.8840 | 10.5329 | 0.6499 | 575.0931   |
| MF0072 | IschemicStroke      | MR Egger                  | 22 | 1.0204 | 0.9525 | 1.0931  | 0.5720 | -0.0031 | 0.0075 | 0.6847 | 10.3818 | 0.9607 | -255.7276  |
| MF0072 | IschemicStroke      | Weighted median           | 22 | 1.0181 | 0.9713 | 1.0673  | 0.4550 | -0.0031 | 0.0075 | 0.6847 | 10.3818 | 0.9607 | -255.7276  |
| MF0072 | IschemicStroke      | Inverse variance weighted | 22 | 1.0076 | 0.9741 | 1.0423  | 0.6609 | -0.0031 | 0.0075 | 0.6847 | 10.3818 | 0.9607 | -255.7276  |
| MF0072 | IschemicStroke      | Simple mode               | 22 | 1.0291 | 0.9506 | 1.1140  | 0.4867 | -0.0031 | 0.0075 | 0.6847 | 10.3818 | 0.9607 | -255.7276  |
| MF0072 | IschemicStroke      | Weighted mode             | 22 | 1.0271 | 0.9626 | 1.0960  | 0.4278 | -0.0031 | 0.0075 | 0.6847 | 10.3818 | 0.9607 | -255.7276  |
| MF0072 | LargeArteryStroke   | MR Egger                  | 17 | 0.9643 | 0.7258 | 1.2811  | 0.8051 | 0.0038  | 0.0282 | 0.8956 | 12.8509 | 0.6138 | -1568.6121 |
| MF0072 | LargeArteryStroke   | Weighted median           | 17 | 0.9794 | 0.8272 | 1.1597  | 0.8094 | 0.0038  | 0.0282 | 0.8956 | 12.8509 | 0.6138 | -1568.6121 |
| MF0072 | LargeArteryStroke   | Inverse variance weighted | 17 | 0.9812 | 0.8665 | 1.1110  | 0.7643 | 0.0038  | 0.0282 | 0.8956 | 12.8509 | 0.6138 | -1568.6121 |
| MF0072 | LargeArteryStroke   | Simple mode               | 17 | 0.8973 | 0.6646 | 1.2113  | 0.4891 | 0.0038  | 0.0282 | 0.8956 | 12.8509 | 0.6138 | -1568.6121 |
| MF0072 | LargeArteryStroke   | Weighted mode             | 17 | 0.9546 | 0.7551 | 1.2069  | 0.7032 | 0.0038  | 0.0282 | 0.8956 | 12.8509 | 0.6138 | -1568.6121 |
| MF0072 | SmallVesselStroke   | MR Egger                  | 17 | 1.0604 | 0.9040 | 1.2439  | 0.4825 | -0.0034 | 0.0159 | 0.8350 | 15.6794 | 0.4037 | -3022.1393 |
| MF0072 | SmallVesselStroke   | Weighted median           | 17 | 1.0042 | 0.9116 | 1.1063  | 0.9316 | -0.0034 | 0.0159 | 0.8350 | 15.6794 | 0.4037 | -3022.1393 |
| MF0072 | SmallVesselStroke   | Inverse variance weighted | 17 | 1.0441 | 0.9748 | 1.1182  | 0.2178 | -0.0034 | 0.0159 | 0.8350 | 15.6794 | 0.4037 | -3022.1393 |
| MF0072 | SmallVesselStroke   | Simple mode               | 17 | 1.0252 | 0.8798 | 1.1945  | 0.7542 | -0.0034 | 0.0159 | 0.8350 | 15.6794 | 0.4037 | -3022.1393 |
| MF0072 | SmallVesselStroke   | Weighted mode             | 17 | 1.0073 | 0.8905 | 1.1394  | 0.9098 | -0.0034 | 0.0159 | 0.8350 | 15.6794 | 0.4037 | -3022.1393 |
| MF0072 | Stroke              | MR Egger                  | 20 | 0.9844 | 0.9092 | 1.0658  | 0.7033 | 0.0003  | 0.0078 | 0.9703 | 9.9972  | 0.9320 | -5817.6548 |
| MF0072 | Stroke              | Weighted median           | 20 | 1.0026 | 0.9602 | 1.0468  | 0.9075 | 0.0003  | 0.0078 | 0.9703 | 9.9972  | 0.9320 | -5817.6548 |
| MF0072 | Stroke              | Inverse variance weighted | 20 | 0.9858 | 0.9545 | 1.0182  | 0.3860 | 0.0003  | 0.0078 | 0.9703 | 9.9972  | 0.9320 | -5817.6548 |
| MF0072 | Stroke              | Simple mode               | 20 | 1.0111 | 0.9396 | 1.0880  | 0.7716 | 0.0003  | 0.0078 | 0.9703 | 9.9972  | 0.9320 | -5817.6548 |
| MF0072 | Stroke              | Weighted mode             | 20 | 1.0119 | 0.9516 | 1.0760  | 0.7103 | 0.0003  | 0.0078 | 0.9703 | 9.9972  | 0.9320 | -5817.6548 |
| MF0073 | CardioEmbolicStroke | MR Egger                  | 12 | 0.5111 | 0.0882 | 2.9607  | 0.4712 | 0.0081  | 0.0397 | 0.8423 | 14.6829 | 0.1441 | 2.5619     |
| MF0073 | CardioEmbolicStroke | Weighted median           | 12 | 0.7130 | 0.2158 | 2.3558  | 0.5790 | 0.0081  | 0.0397 | 0.8423 | 14.6829 | 0.1441 | 2.5619     |
| MF0073 | CardioEmbolicStroke | Inverse variance weighted | 12 | 0.5935 | 0.2255 | 1.5620  | 0.2906 | 0.0081  | 0.0397 | 0.8423 | 14.6829 | 0.1441 | 2.5619     |
| MF0073 | CardioEmbolicStroke | Simple mode               | 12 | 2.2585 | 0.2825 | 18.0545 | 0.4586 | 0.0081  | 0.0397 | 0.8423 | 14.6829 | 0.1441 | 2.5619     |
| MF0073 | CardioEmbolicStroke | Weighted mode             | 12 | 0.8103 | 0.2402 | 2.7337  | 0.7410 | 0.0081  | 0.0397 | 0.8423 | 14.6829 | 0.1441 | 2.5619     |
| MF0073 | IschemicStroke      | MR Egger                  | 28 | 0.8735 | 0.6784 | 1.1245  | 0.3036 | 0.0093  | 0.0074 | 0.2216 | 34.4562 | 0.1532 | 13.4494    |
| MF0073 | IschemicStroke      | Weighted median           | 28 | 1.0505 | 0.8412 | 1.3118  | 0.6638 | 0.0093  | 0.0074 | 0.2216 | 34.4562 | 0.1532 | 13.4494    |
| MF0073 | IschemicStroke      | Inverse variance weighted | 28 | 0.9927 | 0.8497 | 1.1598  | 0.9269 | 0.0093  | 0.0074 | 0.2216 | 34.4562 | 0.1532 | 13.4494    |
| MF0073 | IschemicStroke      | Simple mode               | 28 | 0.7551 | 0.5151 | 1.1069  | 0.1615 | 0.0093  | 0.0074 | 0.2216 | 34.4562 | 0.1532 | 13.4494    |
| MF0073 | IschemicStroke      | Weighted mode             | 28 | 1.0228 | 0.8146 | 1.2841  | 0.8476 | 0.0093  | 0.0074 | 0.2216 | 34.4562 | 0.1532 | 13.4494    |
| MF0073 | LargeArteryStroke   | MR Egger                  | 19 | 1.5190 | 0.6106 | 3.7788  | 0.3811 | -0.0257 | 0.0232 | 0.2821 | 15.0912 | 0.6557 | 1.7033     |
| MF0073 | LargeArteryStroke   | Weighted median           | 19 | 1.4645 | 0.6470 | 3.3147  | 0.3600 | -0.0257 | 0.0232 | 0.2821 | 15.0912 | 0.6557 | 1.7033     |
| MF0073 | LargeArteryStroke   | Inverse variance weighted | 19 | 0.9996 | 0.5859 | 1.7056  | 0.9990 | -0.0257 | 0.0232 | 0.2821 | 15.0912 | 0.6557 | 1.7033     |
| MF0073 | LargeArteryStroke   | Simple mode               | 19 | 1.7232 | 0.4857 | 6.1138  | 0.4107 | -0.0257 | 0.0232 | 0.2821 | 15.0912 | 0.6557 | 1.7033     |
| MF0073 | LargeArteryStroke   | Weighted mode             | 19 | 1.5151 | 0.7043 | 3.2589  | 0.3018 | -0.0257 | 0.0232 | 0.2821 | 15.0912 | 0.6557 | 1.7033     |
| MF0073 | SmallVesselStroke   | MR Egger                  | 19 | 0.9088 | 0.5332 | 1.5490  | 0.7295 | 0.0045  | 0.0136 | 0.7428 | 19.1530 | 0.3198 | 3.3137     |
| MF0073 | SmallVesselStroke   | Weighted median           | 19 | 1.0902 | 0.6887 | 1.7257  | 0.7126 | 0.0045  | 0.0136 | 0.7428 | 19.1530 | 0.3198 | 3.3137     |
| MF0073 | SmallVesselStroke   | Inverse variance weighted | 19 | 0.9781 | 0.7209 | 1.3270  | 0.8868 | 0.0045  | 0.0136 | 0.7428 | 19.1530 | 0.3198 | 3.3137     |
| MF0073 | SmallVesselStroke   | Simple mode               | 19 | 1.1966 | 0.4867 | 2.9419  | 0.7004 | 0.0045  | 0.0136 | 0.7428 | 19.1530 | 0.3198 | 3.3137     |
| MF0073 | SmallVesselStroke   | Weighted mode             | 19 | 1.1280 | 0.7046 | 1.8056  | 0.6220 | 0.0045  | 0.0136 | 0.7428 | 19.1530 | 0.3198 | 3.3137     |
| MF0073 | Stroke              | MR Egger                  | 24 | 0.7604 | 0.5116 | 1.1303  | 0.1894 | 0.0130  | 0.0090 | 0.1615 | 33.1673 | 0.0782 | 8.4342     |
| MF0073 | Stroke              | Weighted median           | 24 | 0.9642 | 0.7693 | 1.2086  | 0.7520 | 0.0130  | 0.0090 | 0.1615 | 33.1673 | 0.0782 | 8.4342     |
| MF0073 | Stroke              | Inverse variance weighted | 24 | 0.9864 | 0.8185 | 1.1887  | 0.8854 | 0.0130  | 0.0090 | 0.1615 | 33.1673 | 0.0782 | 8.4342     |
| MF0073 | Stroke              | Simple mode               | 24 | 0.9339 | 0.5942 | 1.4678  | 0.7697 | 0.0130  | 0.0090 | 0.1615 | 33.1673 | 0.0782 | 8.4342     |
| MF0073 | Stroke              | Weighted mode             | 24 | 0.9398 | 0.6244 | 1.4144  | 0.7685 | 0.0130  | 0.0090 | 0.1615 | 33.1673 | 0.0782 | 8.4342     |
| MF0074 | CardioEmbolicStroke | MR Egger                  | 10 | 0.5303 | 0.0432 | 6.5067  | 0.6333 | 0.0179  | 0.0524 | 0.7417 | 11.8271 | 0.1591 | 3.5486     |

|        |                     |                           |    |        |        |         |        |         |        |        |         |        |           |
|--------|---------------------|---------------------------|----|--------|--------|---------|--------|---------|--------|--------|---------|--------|-----------|
| MF0074 | CardioEmbolicStroke | Weighted median           | 10 | 0.8220 | 0.2032 | 3.3241  | 0.7833 | 0.0179  | 0.0524 | 0.7417 | 11.8271 | 0.1591 | 3.5486    |
| MF0074 | CardioEmbolicStroke | Inverse variance weighted | 10 | 0.7799 | 0.2560 | 2.3766  | 0.6620 | 0.0179  | 0.0524 | 0.7417 | 11.8271 | 0.1591 | 3.5486    |
| MF0074 | CardioEmbolicStroke | Simple mode               | 10 | 2.7830 | 0.1830 | 42.3196 | 0.4799 | 0.0179  | 0.0524 | 0.7417 | 11.8271 | 0.1591 | 3.5486    |
| MF0074 | CardioEmbolicStroke | Weighted mode             | 10 | 2.0812 | 0.2487 | 17.4130 | 0.5159 | 0.0179  | 0.0524 | 0.7417 | 11.8271 | 0.1591 | 3.5486    |
| MF0074 | IschemicStroke      | MR Egger                  | 14 | 1.2468 | 0.7645 | 2.0335  | 0.3941 | -0.0118 | 0.0121 | 0.3469 | 27.5124 | 0.0106 | 3.2030    |
| MF0074 | IschemicStroke      | Weighted median           | 14 | 0.8583 | 0.6375 | 1.1555  | 0.3138 | -0.0118 | 0.0121 | 0.3469 | 27.5124 | 0.0106 | 3.2030    |
| MF0074 | IschemicStroke      | Inverse variance weighted | 14 | 1.0156 | 0.7789 | 1.3242  | 0.9090 | -0.0118 | 0.0121 | 0.3469 | 27.5124 | 0.0106 | 3.2030    |
| MF0074 | IschemicStroke      | Simple mode               | 14 | 0.7513 | 0.4645 | 1.2151  | 0.2647 | -0.0118 | 0.0121 | 0.3469 | 27.5124 | 0.0106 | 3.2030    |
| MF0074 | IschemicStroke      | Weighted mode             | 14 | 0.7816 | 0.5235 | 1.1670  | 0.2497 | -0.0118 | 0.0121 | 0.3469 | 27.5124 | 0.0106 | 3.2030    |
| MF0074 | LargeArteryStroke   | MR Egger                  | 13 | 1.6050 | 0.4967 | 5.1861  | 0.4459 | -0.0436 | 0.0280 | 0.1475 | 11.6837 | 0.4714 | 1.4145    |
| MF0074 | LargeArteryStroke   | Weighted median           | 13 | 0.6088 | 0.2498 | 1.4834  | 0.2747 | -0.0436 | 0.0280 | 0.1475 | 11.6837 | 0.4714 | 1.4145    |
| MF0074 | LargeArteryStroke   | Inverse variance weighted | 13 | 0.7263 | 0.3918 | 1.3463  | 0.3098 | -0.0436 | 0.0280 | 0.1475 | 11.6837 | 0.4714 | 1.4145    |
| MF0074 | LargeArteryStroke   | Simple mode               | 13 | 0.6712 | 0.1652 | 2.7275  | 0.5875 | -0.0436 | 0.0280 | 0.1475 | 11.6837 | 0.4714 | 1.4145    |
| MF0074 | LargeArteryStroke   | Weighted mode             | 13 | 0.6396 | 0.1846 | 2.2162  | 0.4944 | -0.0436 | 0.0280 | 0.1475 | 11.6837 | 0.4714 | 1.4145    |
| MF0074 | SmallVesselStroke   | MR Egger                  | 13 | 0.8464 | 0.3884 | 1.8447  | 0.6829 | 0.0009  | 0.0186 | 0.9612 | 15.7914 | 0.1491 | 5.3717    |
| MF0074 | SmallVesselStroke   | Weighted median           | 13 | 0.9464 | 0.5696 | 1.5724  | 0.8316 | 0.0009  | 0.0186 | 0.9612 | 15.7914 | 0.1491 | 5.3717    |
| MF0074 | SmallVesselStroke   | Inverse variance weighted | 13 | 0.8608 | 0.5822 | 1.2727  | 0.4525 | 0.0009  | 0.0186 | 0.9612 | 15.7914 | 0.1491 | 5.3717    |
| MF0074 | SmallVesselStroke   | Simple mode               | 13 | 0.9320 | 0.4028 | 2.1563  | 0.8721 | 0.0009  | 0.0186 | 0.9612 | 15.7914 | 0.1491 | 5.3717    |
| MF0074 | SmallVesselStroke   | Weighted mode             | 13 | 0.9915 | 0.5153 | 1.9080  | 0.9801 | 0.0009  | 0.0186 | 0.9612 | 15.7914 | 0.1491 | 5.3717    |
| MF0074 | Stroke              | MR Egger                  | 14 | 1.1299 | 0.6537 | 1.9528  | 0.6696 | -0.0067 | 0.0121 | 0.5915 | 29.9446 | 0.0028 | 2.5832    |
| MF0074 | Stroke              | Weighted median           | 14 | 0.9022 | 0.6931 | 1.1744  | 0.4443 | -0.0067 | 0.0121 | 0.5915 | 29.9446 | 0.0028 | 2.5832    |
| MF0074 | Stroke              | Inverse variance weighted | 14 | 0.9892 | 0.7564 | 1.2937  | 0.9370 | -0.0067 | 0.0121 | 0.5915 | 29.9446 | 0.0028 | 2.5832    |
| MF0074 | Stroke              | Simple mode               | 14 | 0.9449 | 0.6229 | 1.4335  | 0.7941 | -0.0067 | 0.0121 | 0.5915 | 29.9446 | 0.0028 | 2.5832    |
| MF0074 | Stroke              | Weighted mode             | 14 | 0.8817 | 0.6337 | 1.2266  | 0.4680 | -0.0067 | 0.0121 | 0.5915 | 29.9446 | 0.0028 | 2.5832    |
| MF0075 | CardioEmbolicStroke | MR Egger                  | 8  | 3.4383 | 1.6383 | 7.2161  | 0.0171 | -0.0654 | 0.0332 | 0.0963 | 6.7556  | 0.4548 | 1.1280    |
| MF0075 | CardioEmbolicStroke | Weighted median           | 8  | 2.0828 | 1.0320 | 4.2038  | 0.0406 | -0.0654 | 0.0332 | 0.0963 | 6.7556  | 0.4548 | 1.1280    |
| MF0075 | CardioEmbolicStroke | Inverse variance weighted | 8  | 1.9908 | 1.2025 | 3.2959  | 0.0074 | -0.0654 | 0.0332 | 0.0963 | 6.7556  | 0.4548 | 1.1280    |
| MF0075 | CardioEmbolicStroke | Simple mode               | 8  | 1.8212 | 0.5084 | 6.5238  | 0.3877 | -0.0654 | 0.0332 | 0.0963 | 6.7556  | 0.4548 | 1.1280    |
| MF0075 | CardioEmbolicStroke | Weighted mode             | 8  | 2.4625 | 1.1855 | 5.1151  | 0.0464 | -0.0654 | 0.0332 | 0.0963 | 6.7556  | 0.4548 | 1.1280    |
| MF0075 | IschemicStroke      | MR Egger                  | 25 | 1.0149 | 0.9034 | 1.1402  | 0.8051 | -0.0025 | 0.0074 | 0.7401 | 26.8073 | 0.2643 | 4750.4554 |
| MF0075 | IschemicStroke      | Weighted median           | 25 | 1.0071 | 0.9001 | 1.1268  | 0.9016 | -0.0025 | 0.0074 | 0.7401 | 26.8073 | 0.2643 | 4750.4554 |
| MF0075 | IschemicStroke      | Inverse variance weighted | 25 | 1.0000 | 0.9266 | 1.0791  | 0.9992 | -0.0025 | 0.0074 | 0.7401 | 26.8073 | 0.2643 | 4750.4554 |
| MF0075 | IschemicStroke      | Simple mode               | 25 | 1.0201 | 0.8528 | 1.2202  | 0.8297 | -0.0025 | 0.0074 | 0.7401 | 26.8073 | 0.2643 | 4750.4554 |
| MF0075 | IschemicStroke      | Weighted mode             | 25 | 1.0237 | 0.9297 | 1.1271  | 0.6383 | -0.0025 | 0.0074 | 0.7401 | 26.8073 | 0.2643 | 4750.4554 |
| MF0075 | LargeArteryStroke   | MR Egger                  | 15 | 1.1462 | 0.7549 | 1.7404  | 0.5330 | -0.0335 | 0.0240 | 0.1857 | 16.3951 | 0.2898 | 17.2888   |
| MF0075 | LargeArteryStroke   | Weighted median           | 15 | 1.0049 | 0.6867 | 1.4706  | 0.9798 | -0.0335 | 0.0240 | 0.1857 | 16.3951 | 0.2898 | 17.2888   |
| MF0075 | LargeArteryStroke   | Inverse variance weighted | 15 | 0.9207 | 0.6873 | 1.2333  | 0.5797 | -0.0335 | 0.0240 | 0.1857 | 16.3951 | 0.2898 | 17.2888   |
| MF0075 | LargeArteryStroke   | Simple mode               | 15 | 0.8185 | 0.4353 | 1.5389  | 0.5441 | -0.0335 | 0.0240 | 0.1857 | 16.3951 | 0.2898 | 17.2888   |
| MF0075 | LargeArteryStroke   | Weighted mode             | 15 | 1.0088 | 0.6950 | 1.4643  | 0.9641 | -0.0335 | 0.0240 | 0.1857 | 16.3951 | 0.2898 | 17.2888   |
| MF0075 | SmallVesselStroke   | MR Egger                  | 15 | 0.9816 | 0.7506 | 1.2836  | 0.8939 | 0.0115  | 0.0157 | 0.4769 | 19.8483 | 0.0991 | 57.3987   |
| MF0075 | SmallVesselStroke   | Weighted median           | 15 | 1.1048 | 0.8922 | 1.3680  | 0.3609 | 0.0115  | 0.0157 | 0.4769 | 19.8483 | 0.0991 | 57.3987   |
| MF0075 | SmallVesselStroke   | Inverse variance weighted | 15 | 1.0563 | 0.8825 | 1.2643  | 0.5506 | 0.0115  | 0.0157 | 0.4769 | 19.8483 | 0.0991 | 57.3987   |
| MF0075 | SmallVesselStroke   | Simple mode               | 15 | 1.0924 | 0.7877 | 1.5150  | 0.6045 | 0.0115  | 0.0157 | 0.4769 | 19.8483 | 0.0991 | 57.3987   |
| MF0075 | SmallVesselStroke   | Weighted mode             | 15 | 1.0629 | 0.8636 | 1.3081  | 0.5740 | 0.0115  | 0.0157 | 0.4769 | 19.8483 | 0.0991 | 57.3987   |
| MF0075 | Stroke              | MR Egger                  | 23 | 0.9612 | 0.8586 | 1.0761  | 0.4998 | -0.0014 | 0.0061 | 0.8258 | 19.8695 | 0.5295 | 354.0161  |
| MF0075 | Stroke              | Weighted median           | 23 | 0.9894 | 0.8895 | 1.1005  | 0.8441 | -0.0014 | 0.0061 | 0.8258 | 19.8695 | 0.5295 | 354.0161  |
| MF0075 | Stroke              | Inverse variance weighted | 23 | 0.9520 | 0.8837 | 1.0255  | 0.1948 | -0.0014 | 0.0061 | 0.8258 | 19.8695 | 0.5295 | 354.0161  |
| MF0075 | Stroke              | Simple mode               | 23 | 0.8103 | 0.6519 | 1.0072  | 0.0712 | -0.0014 | 0.0061 | 0.8258 | 19.8695 | 0.5295 | 354.0161  |
| MF0075 | Stroke              | Weighted mode             | 23 | 1.0017 | 0.9006 | 1.1141  | 0.9753 | -0.0014 | 0.0061 | 0.8258 | 19.8695 | 0.5295 | 354.0161  |
| MF0076 | CardioEmbolicStroke | MR Egger                  | 8  | 0.7484 | 0.1048 | 5.3447  | 0.7824 | 0.0787  | 0.1605 | 0.6413 | 15.9613 | 0.0140 | 3.3738    |
| MF0076 | CardioEmbolicStroke | Weighted median           | 8  | 1.2922 | 0.8421 | 1.9829  | 0.2406 | 0.0787  | 0.1605 | 0.6413 | 15.9613 | 0.0140 | 3.3738    |
| MF0076 | CardioEmbolicStroke | Inverse variance weighted | 8  | 1.2063 | 0.7704 | 1.8888  | 0.4123 | 0.0787  | 0.1605 | 0.6413 | 15.9613 | 0.0140 | 3.3738    |
| MF0076 | CardioEmbolicStroke | Simple mode               | 8  | 1.4406 | 0.7313 | 2.8378  | 0.3263 | 0.0787  | 0.1605 | 0.6413 | 15.9613 | 0.0140 | 3.3738    |

|        |                     |                           |    |        |        |         |        |         |        |        |         |        |             |
|--------|---------------------|---------------------------|----|--------|--------|---------|--------|---------|--------|--------|---------|--------|-------------|
| MF0076 | CardioEmbolicStroke | Weighted mode             | 8  | 1.4299 | 0.7358 | 2.7787  | 0.3265 | 0.0787  | 0.1605 | 0.6413 | 15.9613 | 0.0140 | 3.3738      |
| MF0076 | IschemicStroke      | MR Egger                  | 21 | 0.9633 | 0.8876 | 1.0456  | 0.3828 | -0.0002 | 0.0098 | 0.9873 | 17.2164 | 0.5752 | -109.0467   |
| MF0076 | IschemicStroke      | Weighted median           | 21 | 0.9682 | 0.9104 | 1.0297  | 0.3044 | -0.0002 | 0.0098 | 0.9873 | 17.2164 | 0.5752 | -109.0467   |
| MF0076 | IschemicStroke      | Inverse variance weighted | 21 | 0.9628 | 0.9242 | 1.0029  | 0.0687 | -0.0002 | 0.0098 | 0.9873 | 17.2164 | 0.5752 | -109.0467   |
| MF0076 | IschemicStroke      | Simple mode               | 21 | 0.9201 | 0.8172 | 1.0360  | 0.1839 | -0.0002 | 0.0098 | 0.9873 | 17.2164 | 0.5752 | -109.0467   |
| MF0076 | IschemicStroke      | Weighted mode             | 21 | 0.9514 | 0.8611 | 1.0511  | 0.3388 | -0.0002 | 0.0098 | 0.9873 | 17.2164 | 0.5752 | -109.0467   |
| MF0076 | LargeArteryStroke   | MR Egger                  | 13 | 0.8503 | 0.5916 | 1.2222  | 0.3998 | 0.0265  | 0.0379 | 0.4992 | 7.5906  | 0.7494 | -38194.3628 |
| MF0076 | LargeArteryStroke   | Weighted median           | 13 | 0.9435 | 0.7638 | 1.1655  | 0.5896 | 0.0265  | 0.0379 | 0.4992 | 7.5906  | 0.7494 | -38194.3628 |
| MF0076 | LargeArteryStroke   | Inverse variance weighted | 13 | 0.9555 | 0.8166 | 1.1180  | 0.5698 | 0.0265  | 0.0379 | 0.4992 | 7.5906  | 0.7494 | -38194.3628 |
| MF0076 | LargeArteryStroke   | Simple mode               | 13 | 0.9792 | 0.6876 | 1.3944  | 0.9091 | 0.0265  | 0.0379 | 0.4992 | 7.5906  | 0.7494 | -38194.3628 |
| MF0076 | LargeArteryStroke   | Weighted mode             | 13 | 0.9137 | 0.6734 | 1.2397  | 0.5728 | 0.0265  | 0.0379 | 0.4992 | 7.5906  | 0.7494 | -38194.3628 |
| MF0076 | SmallVesselStroke   | MR Egger                  | 17 | 0.9903 | 0.8275 | 1.1850  | 0.9163 | -0.0003 | 0.0199 | 0.9888 | 3.2486  | 0.9993 | -661.6092   |
| MF0076 | SmallVesselStroke   | Weighted median           | 17 | 1.0015 | 0.9020 | 1.1120  | 0.9779 | -0.0003 | 0.0199 | 0.9888 | 3.2486  | 0.9993 | -661.6092   |
| MF0076 | SmallVesselStroke   | Inverse variance weighted | 17 | 0.9891 | 0.9124 | 1.0722  | 0.7901 | -0.0003 | 0.0199 | 0.9888 | 3.2486  | 0.9993 | -661.6092   |
| MF0076 | SmallVesselStroke   | Simple mode               | 17 | 1.0129 | 0.8609 | 1.1917  | 0.8795 | -0.0003 | 0.0199 | 0.9888 | 3.2486  | 0.9993 | -661.6092   |
| MF0076 | SmallVesselStroke   | Weighted mode             | 17 | 1.0217 | 0.8718 | 1.1974  | 0.7942 | -0.0003 | 0.0199 | 0.9888 | 3.2486  | 0.9993 | -661.6092   |
| MF0076 | Stroke              | MR Egger                  | 19 | 0.9813 | 0.9072 | 1.0614  | 0.6425 | -0.0026 | 0.0089 | 0.7729 | 13.9494 | 0.6707 | -254.7490   |
| MF0076 | Stroke              | Weighted median           | 19 | 0.9707 | 0.9221 | 1.0217  | 0.2551 | -0.0026 | 0.0089 | 0.7729 | 13.9494 | 0.6707 | -254.7490   |
| MF0076 | Stroke              | Inverse variance weighted | 19 | 0.9711 | 0.9361 | 1.0075  | 0.1180 | -0.0026 | 0.0089 | 0.7729 | 13.9494 | 0.6707 | -254.7490   |
| MF0076 | Stroke              | Simple mode               | 19 | 0.9501 | 0.8681 | 1.0399  | 0.2812 | -0.0026 | 0.0089 | 0.7729 | 13.9494 | 0.6707 | -254.7490   |
| MF0076 | Stroke              | Weighted mode             | 19 | 0.9572 | 0.8826 | 1.0380  | 0.3040 | -0.0026 | 0.0089 | 0.7729 | 13.9494 | 0.6707 | -254.7490   |
| MF0077 | CardioEmbolicStroke | MR Egger                  | 12 | 0.9511 | 0.0501 | 18.0473 | 0.9740 | -0.0011 | 0.1408 | 0.9938 | 16.9857 | 0.0747 | 2.8156      |
| MF0077 | CardioEmbolicStroke | Weighted median           | 12 | 1.0572 | 0.6451 | 1.7327  | 0.8253 | -0.0011 | 0.1408 | 0.9938 | 16.9857 | 0.0747 | 2.8156      |
| MF0077 | CardioEmbolicStroke | Inverse variance weighted | 12 | 0.9400 | 0.6113 | 1.4454  | 0.7781 | -0.0011 | 0.1408 | 0.9938 | 16.9857 | 0.0747 | 2.8156      |
| MF0077 | CardioEmbolicStroke | Simple mode               | 12 | 1.0987 | 0.4542 | 2.6577  | 0.8384 | -0.0011 | 0.1408 | 0.9938 | 16.9857 | 0.0747 | 2.8156      |
| MF0077 | CardioEmbolicStroke | Weighted mode             | 12 | 1.1297 | 0.4966 | 2.5699  | 0.7766 | -0.0011 | 0.1408 | 0.9938 | 16.9857 | 0.0747 | 2.8156      |
| MF0077 | IschemicStroke      | MR Egger                  | 16 | 1.0731 | 0.8436 | 1.3651  | 0.5744 | -0.0107 | 0.0125 | 0.4041 | 13.3388 | 0.5000 | 183.5561    |
| MF0077 | IschemicStroke      | Weighted median           | 16 | 0.9873 | 0.8886 | 1.0969  | 0.8117 | -0.0107 | 0.0125 | 0.4041 | 13.3388 | 0.5000 | 183.5561    |
| MF0077 | IschemicStroke      | Inverse variance weighted | 16 | 0.9704 | 0.9021 | 1.0438  | 0.4190 | -0.0107 | 0.0125 | 0.4041 | 13.3388 | 0.5000 | 183.5561    |
| MF0077 | IschemicStroke      | Simple mode               | 16 | 1.0223 | 0.8380 | 1.2470  | 0.8309 | -0.0107 | 0.0125 | 0.4041 | 13.3388 | 0.5000 | 183.5561    |
| MF0077 | IschemicStroke      | Weighted mode             | 16 | 1.0356 | 0.8736 | 1.2275  | 0.6927 | -0.0107 | 0.0125 | 0.4041 | 13.3388 | 0.5000 | 183.5561    |
| MF0077 | LargeArteryStroke   | MR Egger                  | 12 | 1.5053 | 0.2447 | 9.2603  | 0.6684 | -0.0524 | 0.0870 | 0.5603 | 11.5623 | 0.3154 | 7.0696      |
| MF0077 | LargeArteryStroke   | Weighted median           | 12 | 0.7447 | 0.5185 | 1.0696  | 0.1105 | -0.0524 | 0.0870 | 0.5603 | 11.5623 | 0.3154 | 7.0696      |
| MF0077 | LargeArteryStroke   | Inverse variance weighted | 12 | 0.8669 | 0.6617 | 1.1357  | 0.2999 | -0.0524 | 0.0870 | 0.5603 | 11.5623 | 0.3154 | 7.0696      |
| MF0077 | LargeArteryStroke   | Simple mode               | 12 | 0.6966 | 0.3742 | 1.2968  | 0.2784 | -0.0524 | 0.0870 | 0.5603 | 11.5623 | 0.3154 | 7.0696      |
| MF0077 | LargeArteryStroke   | Weighted mode             | 12 | 0.6922 | 0.3847 | 1.2458  | 0.2454 | -0.0524 | 0.0870 | 0.5603 | 11.5623 | 0.3154 | 7.0696      |
| MF0077 | SmallVesselStroke   | MR Egger                  | 13 | 1.3163 | 0.7883 | 2.1978  | 0.3159 | -0.0267 | 0.0257 | 0.3209 | 11.7697 | 0.4643 | 27.3435     |
| MF0077 | SmallVesselStroke   | Weighted median           | 13 | 0.9993 | 0.8284 | 1.2056  | 0.9944 | -0.0267 | 0.0257 | 0.3209 | 11.7697 | 0.4643 | 27.3435     |
| MF0077 | SmallVesselStroke   | Inverse variance weighted | 13 | 1.0128 | 0.8835 | 1.1612  | 0.8547 | -0.0267 | 0.0257 | 0.3209 | 11.7697 | 0.4643 | 27.3435     |
| MF0077 | SmallVesselStroke   | Simple mode               | 13 | 1.0205 | 0.7178 | 1.4508  | 0.9118 | -0.0267 | 0.0257 | 0.3209 | 11.7697 | 0.4643 | 27.3435     |
| MF0077 | SmallVesselStroke   | Weighted mode             | 13 | 1.0268 | 0.7288 | 1.4466  | 0.8823 | -0.0267 | 0.0257 | 0.3209 | 11.7697 | 0.4643 | 27.3435     |
| MF0077 | Stroke              | MR Egger                  | 16 | 1.0408 | 0.8484 | 1.2768  | 0.7069 | -0.0075 | 0.0106 | 0.4897 | 10.1581 | 0.7505 | 302.3656    |
| MF0077 | Stroke              | Weighted median           | 16 | 0.9822 | 0.9058 | 1.0650  | 0.6636 | -0.0075 | 0.0106 | 0.4897 | 10.1581 | 0.7505 | 302.3656    |
| MF0077 | Stroke              | Inverse variance weighted | 16 | 0.9700 | 0.9114 | 1.0324  | 0.3382 | -0.0075 | 0.0106 | 0.4897 | 10.1581 | 0.7505 | 302.3656    |
| MF0077 | Stroke              | Simple mode               | 16 | 0.9810 | 0.8438 | 1.1405  | 0.8062 | -0.0075 | 0.0106 | 0.4897 | 10.1581 | 0.7505 | 302.3656    |
| MF0077 | Stroke              | Weighted mode             | 16 | 0.9952 | 0.8620 | 1.1489  | 0.9480 | -0.0075 | 0.0106 | 0.4897 | 10.1581 | 0.7505 | 302.3656    |
| MF0078 | CardioEmbolicStroke | MR Egger                  | 14 | 0.8682 | 0.3259 | 2.3127  | 0.7821 | -0.0159 | 0.0526 | 0.7678 | 11.8919 | 0.4544 | 3.8879      |
| MF0078 | CardioEmbolicStroke | Weighted median           | 14 | 0.8416 | 0.5232 | 1.3537  | 0.4770 | -0.0159 | 0.0526 | 0.7678 | 11.8919 | 0.4544 | 3.8879      |
| MF0078 | CardioEmbolicStroke | Inverse variance weighted | 14 | 0.7535 | 0.5372 | 1.0568  | 0.1010 | -0.0159 | 0.0526 | 0.7678 | 11.8919 | 0.4544 | 3.8879      |
| MF0078 | CardioEmbolicStroke | Simple mode               | 14 | 0.7938 | 0.3568 | 1.7660  | 0.5811 | -0.0159 | 0.0526 | 0.7678 | 11.8919 | 0.4544 | 3.8879      |
| MF0078 | CardioEmbolicStroke | Weighted mode             | 14 | 0.8539 | 0.4285 | 1.7017  | 0.6609 | -0.0159 | 0.0526 | 0.7678 | 11.8919 | 0.4544 | 3.8879      |
| MF0078 | IschemicStroke      | MR Egger                  | 24 | 0.9764 | 0.8562 | 1.1135  | 0.7253 | 0.0055  | 0.0085 | 0.5242 | 18.6275 | 0.6682 | 16672.4565  |
| MF0078 | IschemicStroke      | Weighted median           | 24 | 1.0056 | 0.9213 | 1.0977  | 0.9002 | 0.0055  | 0.0085 | 0.5242 | 18.6275 | 0.6682 | 16672.4565  |

|        |                     |                           |    |        |        |          |        |         |        |        |         |        |            |
|--------|---------------------|---------------------------|----|--------|--------|----------|--------|---------|--------|--------|---------|--------|------------|
| MF0078 | IschemicStroke      | Inverse variance weighted | 24 | 1.0146 | 0.9544 | 1.0786   | 0.6414 | 0.0055  | 0.0085 | 0.5242 | 18.6275 | 0.6682 | 16672.4565 |
| MF0078 | IschemicStroke      | Simple mode               | 24 | 0.9961 | 0.8494 | 1.1683   | 0.9625 | 0.0055  | 0.0085 | 0.5242 | 18.6275 | 0.6682 | 16672.4565 |
| MF0078 | IschemicStroke      | Weighted mode             | 24 | 1.0022 | 0.8667 | 1.1589   | 0.9765 | 0.0055  | 0.0085 | 0.5242 | 18.6275 | 0.6682 | 16672.4565 |
| MF0078 | LargeArteryStroke   | MR Egger                  | 18 | 1.2132 | 0.7030 | 2.0936   | 0.4976 | -0.0189 | 0.0326 | 0.5706 | 17.4714 | 0.3557 | 14.7899    |
| MF0078 | LargeArteryStroke   | Weighted median           | 18 | 0.9600 | 0.6996 | 1.3173   | 0.8004 | -0.0189 | 0.0326 | 0.5706 | 17.4714 | 0.3557 | 14.7899    |
| MF0078 | LargeArteryStroke   | Inverse variance weighted | 18 | 1.0482 | 0.8365 | 1.3135   | 0.6827 | -0.0189 | 0.0326 | 0.5706 | 17.4714 | 0.3557 | 14.7899    |
| MF0078 | LargeArteryStroke   | Simple mode               | 18 | 1.0754 | 0.6029 | 1.9180   | 0.8085 | -0.0189 | 0.0326 | 0.5706 | 17.4714 | 0.3557 | 14.7899    |
| MF0078 | LargeArteryStroke   | Weighted mode             | 18 | 0.9635 | 0.6121 | 1.5168   | 0.8743 | -0.0189 | 0.0326 | 0.5706 | 17.4714 | 0.3557 | 14.7899    |
| MF0078 | SmallVesselStroke   | MR Egger                  | 20 | 0.8516 | 0.6481 | 1.1192   | 0.2643 | 0.0103  | 0.0168 | 0.5477 | 8.2023  | 0.9755 | 115.9297   |
| MF0078 | SmallVesselStroke   | Weighted median           | 20 | 0.9513 | 0.8101 | 1.1172   | 0.5429 | 0.0103  | 0.0168 | 0.5477 | 8.2023  | 0.9755 | 115.9297   |
| MF0078 | SmallVesselStroke   | Inverse variance weighted | 20 | 0.9199 | 0.8182 | 1.0343   | 0.1629 | 0.0103  | 0.0168 | 0.5477 | 8.2023  | 0.9755 | 115.9297   |
| MF0078 | SmallVesselStroke   | Simple mode               | 20 | 1.0409 | 0.7987 | 1.3564   | 0.7700 | 0.0103  | 0.0168 | 0.5477 | 8.2023  | 0.9755 | 115.9297   |
| MF0078 | SmallVesselStroke   | Weighted mode             | 20 | 1.0358 | 0.8138 | 1.3183   | 0.7783 | 0.0103  | 0.0168 | 0.5477 | 8.2023  | 0.9755 | 115.9297   |
| MF0078 | Stroke              | MR Egger                  | 22 | 0.9691 | 0.8397 | 1.1185   | 0.6727 | 0.0045  | 0.0085 | 0.5990 | 18.4679 | 0.5566 | 593.6797   |
| MF0078 | Stroke              | Weighted median           | 22 | 1.0079 | 0.9296 | 1.0929   | 0.8486 | 0.0045  | 0.0085 | 0.5990 | 18.4679 | 0.5566 | 593.6797   |
| MF0078 | Stroke              | Inverse variance weighted | 22 | 1.0043 | 0.9470 | 1.0651   | 0.8859 | 0.0045  | 0.0085 | 0.5990 | 18.4679 | 0.5566 | 593.6797   |
| MF0078 | Stroke              | Simple mode               | 22 | 1.0028 | 0.8504 | 1.1825   | 0.9737 | 0.0045  | 0.0085 | 0.5990 | 18.4679 | 0.5566 | 593.6797   |
| MF0078 | Stroke              | Weighted mode             | 22 | 0.9976 | 0.8569 | 1.1614   | 0.9752 | 0.0045  | 0.0085 | 0.5990 | 18.4679 | 0.5566 | 593.6797   |
| MF0079 | CardioEmbolicStroke | MR Egger                  | 15 | 0.6749 | 0.3536 | 1.2882   | 0.2545 | 0.0667  | 0.0531 | 0.2311 | 11.7717 | 0.6246 | 107.1384   |
| MF0079 | CardioEmbolicStroke | Weighted median           | 15 | 0.9925 | 0.7672 | 1.2839   | 0.9541 | 0.0667  | 0.0531 | 0.2311 | 11.7717 | 0.6246 | 107.1384   |
| MF0079 | CardioEmbolicStroke | Inverse variance weighted | 15 | 1.0030 | 0.8300 | 1.2119   | 0.9756 | 0.0667  | 0.0531 | 0.2311 | 11.7717 | 0.6246 | 107.1384   |
| MF0079 | CardioEmbolicStroke | Simple mode               | 15 | 1.3214 | 0.8243 | 2.1184   | 0.2665 | 0.0667  | 0.0531 | 0.2311 | 11.7717 | 0.6246 | 107.1384   |
| MF0079 | CardioEmbolicStroke | Weighted mode             | 15 | 0.8313 | 0.5274 | 1.3102   | 0.4394 | 0.0667  | 0.0531 | 0.2311 | 11.7717 | 0.6246 | 107.1384   |
| MF0079 | IschemicStroke      | MR Egger                  | 21 | 0.9537 | 0.8202 | 1.1088   | 0.5446 | 0.0081  | 0.0138 | 0.5642 | 44.5340 | 0.0008 | -445.4454  |
| MF0079 | IschemicStroke      | Weighted median           | 21 | 1.0044 | 0.9448 | 1.0677   | 0.8882 | 0.0081  | 0.0138 | 0.5642 | 44.5340 | 0.0008 | -445.4454  |
| MF0079 | IschemicStroke      | Inverse variance weighted | 21 | 0.9942 | 0.9387 | 1.0529   | 0.8419 | 0.0081  | 0.0138 | 0.5642 | 44.5340 | 0.0008 | -445.4454  |
| MF0079 | IschemicStroke      | Simple mode               | 21 | 0.9258 | 0.8087 | 1.0599   | 0.2774 | 0.0081  | 0.0138 | 0.5642 | 44.5340 | 0.0008 | -445.4454  |
| MF0079 | IschemicStroke      | Weighted mode             | 21 | 0.9370 | 0.8332 | 1.0537   | 0.2901 | 0.0081  | 0.0138 | 0.5642 | 44.5340 | 0.0008 | -445.4454  |
| MF0079 | LargeArteryStroke   | MR Egger                  | 19 | 1.0013 | 0.7103 | 1.4115   | 0.9943 | 0.0008  | 0.0307 | 0.9803 | 17.2417 | 0.4381 | -2259.7856 |
| MF0079 | LargeArteryStroke   | Weighted median           | 19 | 1.1283 | 0.9427 | 1.3504   | 0.1882 | 0.0008  | 0.0307 | 0.9803 | 17.2417 | 0.4381 | -2259.7856 |
| MF0079 | LargeArteryStroke   | Inverse variance weighted | 19 | 1.0054 | 0.8853 | 1.1417   | 0.9343 | 0.0008  | 0.0307 | 0.9803 | 17.2417 | 0.4381 | -2259.7856 |
| MF0079 | LargeArteryStroke   | Simple mode               | 19 | 1.1836 | 0.8822 | 1.5880   | 0.2758 | 0.0008  | 0.0307 | 0.9803 | 17.2417 | 0.4381 | -2259.7856 |
| MF0079 | LargeArteryStroke   | Weighted mode             | 19 | 1.1911 | 0.9002 | 1.5759   | 0.2367 | 0.0008  | 0.0307 | 0.9803 | 17.2417 | 0.4381 | -2259.7856 |
| MF0079 | SmallVesselStroke   | MR Egger                  | 21 | 0.9257 | 0.7712 | 1.1111   | 0.4172 | 0.0035  | 0.0167 | 0.8347 | 20.1126 | 0.3878 | -188.3986  |
| MF0079 | SmallVesselStroke   | Weighted median           | 21 | 0.9110 | 0.8252 | 1.0057   | 0.0646 | 0.0035  | 0.0167 | 0.8347 | 20.1126 | 0.3878 | -188.3986  |
| MF0079 | SmallVesselStroke   | Inverse variance weighted | 21 | 0.9426 | 0.8796 | 1.0102   | 0.0943 | 0.0035  | 0.0167 | 0.8347 | 20.1126 | 0.3878 | -188.3986  |
| MF0079 | SmallVesselStroke   | Simple mode               | 21 | 0.8965 | 0.7726 | 1.0404   | 0.1659 | 0.0035  | 0.0167 | 0.8347 | 20.1126 | 0.3878 | -188.3986  |
| MF0079 | SmallVesselStroke   | Weighted mode             | 21 | 0.8890 | 0.7721 | 1.0236   | 0.1176 | 0.0035  | 0.0167 | 0.8347 | 20.1126 | 0.3878 | -188.3986  |
| MF0079 | Stroke              | MR Egger                  | 23 | 0.9562 | 0.8561 | 1.0679   | 0.4357 | 0.0087  | 0.0102 | 0.4027 | 37.4654 | 0.0149 | -383.0156  |
| MF0079 | Stroke              | Weighted median           | 23 | 0.9599 | 0.9158 | 1.0062   | 0.0885 | 0.0087  | 0.0102 | 0.4027 | 37.4654 | 0.0149 | -383.0156  |
| MF0079 | Stroke              | Inverse variance weighted | 23 | 0.9996 | 0.9578 | 1.0432   | 0.9840 | 0.0087  | 0.0102 | 0.4027 | 37.4654 | 0.0149 | -383.0156  |
| MF0079 | Stroke              | Simple mode               | 23 | 1.0475 | 0.9528 | 1.1516   | 0.3478 | 0.0087  | 0.0102 | 0.4027 | 37.4654 | 0.0149 | -383.0156  |
| MF0079 | Stroke              | Weighted mode             | 23 | 0.9360 | 0.8581 | 1.0209   | 0.1496 | 0.0087  | 0.0102 | 0.4027 | 37.4654 | 0.0149 | -383.0156  |
| MF0080 | CardioEmbolicStroke | MR Egger                  | 6  | 1.3251 | 0.0112 | 156.1755 | 0.9135 | -0.0095 | 0.2835 | 0.9749 | 9.4141  | 0.0515 | 2.5533     |
| MF0080 | CardioEmbolicStroke | Weighted median           | 6  | 1.1824 | 0.6853 | 2.0402   | 0.5471 | -0.0095 | 0.2835 | 0.9749 | 9.4141  | 0.0515 | 2.5533     |
| MF0080 | CardioEmbolicStroke | Inverse variance weighted | 6  | 1.2221 | 0.6916 | 2.1597   | 0.4899 | -0.0095 | 0.2835 | 0.9749 | 9.4141  | 0.0515 | 2.5533     |
| MF0080 | CardioEmbolicStroke | Simple mode               | 6  | 1.1994 | 0.5048 | 2.8497   | 0.6976 | -0.0095 | 0.2835 | 0.9749 | 9.4141  | 0.0515 | 2.5533     |
| MF0080 | CardioEmbolicStroke | Weighted mode             | 6  | 1.2095 | 0.5258 | 2.7819   | 0.6732 | -0.0095 | 0.2835 | 0.9749 | 9.4141  | 0.0515 | 2.5533     |
| MF0080 | IschemicStroke      | MR Egger                  | 12 | 0.9909 | 0.8810 | 1.1145   | 0.8814 | 0.0072  | 0.0102 | 0.4983 | 9.3447  | 0.4997 | 46110.8738 |
| MF0080 | IschemicStroke      | Weighted median           | 12 | 1.0173 | 0.9305 | 1.1121   | 0.7065 | 0.0072  | 0.0102 | 0.4983 | 9.3447  | 0.4997 | 46110.8738 |
| MF0080 | IschemicStroke      | Inverse variance weighted | 12 | 1.0272 | 0.9663 | 1.0919   | 0.3894 | 0.0072  | 0.0102 | 0.4983 | 9.3447  | 0.4997 | 46110.8738 |
| MF0080 | IschemicStroke      | Simple mode               | 12 | 1.0146 | 0.8726 | 1.1797   | 0.8539 | 0.0072  | 0.0102 | 0.4983 | 9.3447  | 0.4997 | 46110.8738 |
| MF0080 | IschemicStroke      | Weighted mode             | 12 | 1.0094 | 0.8878 | 1.1477   | 0.8891 | 0.0072  | 0.0102 | 0.4983 | 9.3447  | 0.4997 | 46110.8738 |

|        |                     |                           |    |        |        |        |        |         |        |        |         |        |            |
|--------|---------------------|---------------------------|----|--------|--------|--------|--------|---------|--------|--------|---------|--------|------------|
| MF0080 | LargeArteryStroke   | MR Egger                  | 11 | 0.9645 | 0.5831 | 1.5954 | 0.8911 | 0.0184  | 0.0394 | 0.6526 | 4.7044  | 0.8593 | 175.6419   |
| MF0080 | LargeArteryStroke   | Weighted median           | 11 | 0.9410 | 0.6978 | 1.2690 | 0.6901 | 0.0184  | 0.0394 | 0.6526 | 4.7044  | 0.8593 | 175.6419   |
| MF0080 | LargeArteryStroke   | Inverse variance weighted | 11 | 1.0739 | 0.8611 | 1.3392 | 0.5270 | 0.0184  | 0.0394 | 0.6526 | 4.7044  | 0.8593 | 175.6419   |
| MF0080 | LargeArteryStroke   | Simple mode               | 11 | 0.9281 | 0.6224 | 1.3839 | 0.7219 | 0.0184  | 0.0394 | 0.6526 | 4.7044  | 0.8593 | 175.6419   |
| MF0080 | LargeArteryStroke   | Weighted mode             | 11 | 0.9345 | 0.6528 | 1.3377 | 0.7188 | 0.0184  | 0.0394 | 0.6526 | 4.7044  | 0.8593 | 175.6419   |
| MF0080 | SmallVesselStroke   | MR Egger                  | 11 | 0.9380 | 0.7113 | 1.2368 | 0.6607 | 0.0152  | 0.0218 | 0.5046 | 5.3857  | 0.7995 | 371.6469   |
| MF0080 | SmallVesselStroke   | Weighted median           | 11 | 1.0371 | 0.8847 | 1.2157 | 0.6534 | 0.0152  | 0.0218 | 0.5046 | 5.3857  | 0.7995 | 371.6469   |
| MF0080 | SmallVesselStroke   | Inverse variance weighted | 11 | 1.0242 | 0.9063 | 1.1575 | 0.7014 | 0.0152  | 0.0218 | 0.5046 | 5.3857  | 0.7995 | 371.6469   |
| MF0080 | SmallVesselStroke   | Simple mode               | 11 | 1.1473 | 0.8747 | 1.5048 | 0.3441 | 0.0152  | 0.0218 | 0.5046 | 5.3857  | 0.7995 | 371.6469   |
| MF0080 | SmallVesselStroke   | Weighted mode             | 11 | 1.0987 | 0.8803 | 1.3713 | 0.4247 | 0.0152  | 0.0218 | 0.5046 | 5.3857  | 0.7995 | 371.6469   |
| MF0080 | Stroke              | MR Egger                  | 14 | 1.0024 | 0.8890 | 1.1302 | 0.9699 | 0.0040  | 0.0095 | 0.6854 | 11.8361 | 0.4589 | 29912.4919 |
| MF0080 | Stroke              | Weighted median           | 14 | 1.0178 | 0.9402 | 1.1017 | 0.6631 | 0.0040  | 0.0095 | 0.6854 | 11.8361 | 0.4589 | 29912.4919 |
| MF0080 | Stroke              | Inverse variance weighted | 14 | 1.0253 | 0.9703 | 1.0834 | 0.3750 | 0.0040  | 0.0095 | 0.6854 | 11.8361 | 0.4589 | 29912.4919 |
| MF0080 | Stroke              | Simple mode               | 14 | 1.0391 | 0.8998 | 1.2000 | 0.6104 | 0.0040  | 0.0095 | 0.6854 | 11.8361 | 0.4589 | 29912.4919 |
| MF0080 | Stroke              | Weighted mode             | 14 | 1.0213 | 0.8688 | 1.2006 | 0.8026 | 0.0040  | 0.0095 | 0.6854 | 11.8361 | 0.4589 | 29912.4919 |
| MF0081 | CardioEmbolicStroke | MR Egger                  | 7  | 0.8747 | 0.3436 | 2.2271 | 0.7902 | 0.0628  | 0.1242 | 0.6344 | 7.1553  | 0.2093 | 259.2344   |
| MF0081 | CardioEmbolicStroke | Weighted median           | 7  | 1.0246 | 0.8083 | 1.2988 | 0.8409 | 0.0628  | 0.1242 | 0.6344 | 7.1553  | 0.2093 | 259.2344   |
| MF0081 | CardioEmbolicStroke | Inverse variance weighted | 7  | 1.1062 | 0.9043 | 1.3531 | 0.3264 | 0.0628  | 0.1242 | 0.6344 | 7.1553  | 0.2093 | 259.2344   |
| MF0081 | CardioEmbolicStroke | Simple mode               | 7  | 1.0088 | 0.7271 | 1.3997 | 0.9597 | 0.0628  | 0.1242 | 0.6344 | 7.1553  | 0.2093 | 259.2344   |
| MF0081 | CardioEmbolicStroke | Weighted mode             | 7  | 1.0062 | 0.7330 | 1.3814 | 0.9705 | 0.0628  | 0.1242 | 0.6344 | 7.1553  | 0.2093 | 259.2344   |
| MF0081 | IschemicStroke      | MR Egger                  | 15 | 1.0299 | 0.9767 | 1.0860 | 0.2959 | -0.0093 | 0.0101 | 0.3721 | 13.6076 | 0.4020 | -112.2476  |
| MF0081 | IschemicStroke      | Weighted median           | 15 | 1.0168 | 0.9808 | 1.0540 | 0.3652 | -0.0093 | 0.0101 | 0.3721 | 13.6076 | 0.4020 | -112.2476  |
| MF0081 | IschemicStroke      | Inverse variance weighted | 15 | 1.0078 | 0.9817 | 1.0346 | 0.5619 | -0.0093 | 0.0101 | 0.3721 | 13.6076 | 0.4020 | -112.2476  |
| MF0081 | IschemicStroke      | Simple mode               | 15 | 1.0191 | 0.9679 | 1.0730 | 0.4836 | -0.0093 | 0.0101 | 0.3721 | 13.6076 | 0.4020 | -112.2476  |
| MF0081 | IschemicStroke      | Weighted mode             | 15 | 1.0163 | 0.9763 | 1.0579 | 0.4435 | -0.0093 | 0.0101 | 0.3721 | 13.6076 | 0.4020 | -112.2476  |
| MF0081 | LargeArteryStroke   | MR Egger                  | 12 | 1.0027 | 0.8041 | 1.2504 | 0.9812 | 0.0056  | 0.0377 | 0.8840 | 3.9606  | 0.9491 | -114.0674  |
| MF0081 | LargeArteryStroke   | Weighted median           | 12 | 1.0060 | 0.8884 | 1.1392 | 0.9246 | 0.0056  | 0.0377 | 0.8840 | 3.9606  | 0.9491 | -114.0674  |
| MF0081 | LargeArteryStroke   | Inverse variance weighted | 12 | 1.0181 | 0.9254 | 1.1200 | 0.7128 | 0.0056  | 0.0377 | 0.8840 | 3.9606  | 0.9491 | -114.0674  |
| MF0081 | LargeArteryStroke   | Simple mode               | 12 | 0.9676 | 0.8011 | 1.1686 | 0.7388 | 0.0056  | 0.0377 | 0.8840 | 3.9606  | 0.9491 | -114.0674  |
| MF0081 | LargeArteryStroke   | Weighted mode             | 12 | 0.9788 | 0.8212 | 1.1667 | 0.8154 | 0.0056  | 0.0377 | 0.8840 | 3.9606  | 0.9491 | -114.0674  |
| MF0081 | SmallVesselStroke   | MR Egger                  | 13 | 1.0038 | 0.9061 | 1.1120 | 0.9440 | -0.0031 | 0.0193 | 0.8735 | 12.9878 | 0.2941 | -94.2115   |
| MF0081 | SmallVesselStroke   | Weighted median           | 13 | 0.9957 | 0.9339 | 1.0616 | 0.8950 | -0.0031 | 0.0193 | 0.8735 | 12.9878 | 0.2941 | -94.2115   |
| MF0081 | SmallVesselStroke   | Inverse variance weighted | 13 | 0.9964 | 0.9485 | 1.0467 | 0.8856 | -0.0031 | 0.0193 | 0.8735 | 12.9878 | 0.2941 | -94.2115   |
| MF0081 | SmallVesselStroke   | Simple mode               | 13 | 0.9692 | 0.8782 | 1.0695 | 0.5450 | -0.0031 | 0.0193 | 0.8735 | 12.9878 | 0.2941 | -94.2115   |
| MF0081 | SmallVesselStroke   | Weighted mode             | 13 | 0.9851 | 0.9095 | 1.0669 | 0.7181 | -0.0031 | 0.0193 | 0.8735 | 12.9878 | 0.2941 | -94.2115   |
| MF0081 | Stroke              | MR Egger                  | 16 | 1.0100 | 0.9614 | 1.0612 | 0.6977 | 0.0012  | 0.0089 | 0.8947 | 13.1177 | 0.5173 | -131.3626  |
| MF0081 | Stroke              | Weighted median           | 16 | 1.0174 | 0.9854 | 1.0504 | 0.2911 | 0.0012  | 0.0089 | 0.8947 | 13.1177 | 0.5173 | -131.3626  |
| MF0081 | Stroke              | Inverse variance weighted | 16 | 1.0131 | 0.9903 | 1.0365 | 0.2633 | 0.0012  | 0.0089 | 0.8947 | 13.1177 | 0.5173 | -131.3626  |
| MF0081 | Stroke              | Simple mode               | 16 | 1.0181 | 0.9711 | 1.0673 | 0.4689 | 0.0012  | 0.0089 | 0.8947 | 13.1177 | 0.5173 | -131.3626  |
| MF0081 | Stroke              | Weighted mode             | 16 | 1.0169 | 0.9751 | 1.0605 | 0.4461 | 0.0012  | 0.0089 | 0.8947 | 13.1177 | 0.5173 | -131.3626  |
| MF0082 | CardioEmbolicStroke | MR Egger                  | 7  | 0.8518 | 0.4833 | 1.5012 | 0.6029 | 0.0531  | 0.0710 | 0.4886 | 1.4701  | 0.9615 | 613.8419   |
| MF0082 | CardioEmbolicStroke | Weighted median           | 7  | 0.9996 | 0.7778 | 1.2846 | 0.9975 | 0.0531  | 0.0710 | 0.4886 | 1.4701  | 0.9615 | 613.8419   |
| MF0082 | CardioEmbolicStroke | Inverse variance weighted | 7  | 1.0428 | 0.8550 | 1.2718 | 0.6790 | 0.0531  | 0.0710 | 0.4886 | 1.4701  | 0.9615 | 613.8419   |
| MF0082 | CardioEmbolicStroke | Simple mode               | 7  | 0.9966 | 0.7143 | 1.3905 | 0.9849 | 0.0531  | 0.0710 | 0.4886 | 1.4701  | 0.9615 | 613.8419   |
| MF0082 | CardioEmbolicStroke | Weighted mode             | 7  | 0.9856 | 0.7092 | 1.3698 | 0.9340 | 0.0531  | 0.0710 | 0.4886 | 1.4701  | 0.9615 | 613.8419   |
| MF0082 | IschemicStroke      | MR Egger                  | 14 | 0.9988 | 0.9450 | 1.0556 | 0.9659 | -0.0002 | 0.0097 | 0.9878 | 11.0632 | 0.5235 | -130.1960  |
| MF0082 | IschemicStroke      | Weighted median           | 14 | 0.9779 | 0.9385 | 1.0190 | 0.2879 | -0.0002 | 0.0097 | 0.9878 | 11.0632 | 0.5235 | -130.1960  |
| MF0082 | IschemicStroke      | Inverse variance weighted | 14 | 0.9984 | 0.9689 | 1.0288 | 0.9166 | -0.0002 | 0.0097 | 0.9878 | 11.0632 | 0.5235 | -130.1960  |
| MF0082 | IschemicStroke      | Simple mode               | 14 | 1.0432 | 0.9647 | 1.1280 | 0.3087 | -0.0002 | 0.0097 | 0.9878 | 11.0632 | 0.5235 | -130.1960  |
| MF0082 | IschemicStroke      | Weighted mode             | 14 | 1.0446 | 0.9763 | 1.1176 | 0.2283 | -0.0002 | 0.0097 | 0.9878 | 11.0632 | 0.5235 | -130.1960  |
| MF0082 | LargeArteryStroke   | MR Egger                  | 10 | 1.0748 | 0.8155 | 1.4165 | 0.6226 | -0.0473 | 0.0406 | 0.2772 | 6.7403  | 0.6641 | -586.2584  |
| MF0082 | LargeArteryStroke   | Weighted median           | 10 | 1.0025 | 0.8542 | 1.1765 | 0.9760 | -0.0473 | 0.0406 | 0.2772 | 6.7403  | 0.6641 | -586.2584  |
| MF0082 | LargeArteryStroke   | Inverse variance weighted | 10 | 0.9270 | 0.8223 | 1.0449 | 0.2146 | -0.0473 | 0.0406 | 0.2772 | 6.7403  | 0.6641 | -586.2584  |

|        |                     |                           |    |        |        |        |        |         |        |        |         |        |           |
|--------|---------------------|---------------------------|----|--------|--------|--------|--------|---------|--------|--------|---------|--------|-----------|
| MF0082 | LargeArteryStroke   | Simple mode               | 10 | 0.7749 | 0.5927 | 1.0131 | 0.0951 | -0.0473 | 0.0406 | 0.2772 | 6.7403  | 0.6641 | -586.2584 |
| MF0082 | LargeArteryStroke   | Weighted mode             | 10 | 1.0534 | 0.8516 | 1.3030 | 0.6432 | -0.0473 | 0.0406 | 0.2772 | 6.7403  | 0.6641 | -586.2584 |
| MF0082 | SmallVesselStroke   | MR Egger                  | 10 | 0.9268 | 0.7955 | 1.0798 | 0.3582 | 0.0391  | 0.0225 | 0.1201 | 9.6562  | 0.3790 | -816.9466 |
| MF0082 | SmallVesselStroke   | Weighted median           | 10 | 1.0465 | 0.9553 | 1.1465 | 0.3285 | 0.0391  | 0.0225 | 0.1201 | 9.6562  | 0.3790 | -816.9466 |
| MF0082 | SmallVesselStroke   | Inverse variance weighted | 10 | 1.0472 | 0.9776 | 1.1219 | 0.1886 | 0.0391  | 0.0225 | 0.1201 | 9.6562  | 0.3790 | -816.9466 |
| MF0082 | SmallVesselStroke   | Simple mode               | 10 | 1.0570 | 0.9351 | 1.1949 | 0.3982 | 0.0391  | 0.0225 | 0.1201 | 9.6562  | 0.3790 | -816.9466 |
| MF0082 | SmallVesselStroke   | Weighted mode             | 10 | 1.0448 | 0.9320 | 1.1712 | 0.4715 | 0.0391  | 0.0225 | 0.1201 | 9.6562  | 0.3790 | -816.9466 |
| MF0082 | Stroke              | MR Egger                  | 11 | 0.9703 | 0.8899 | 1.0579 | 0.5112 | 0.0075  | 0.0127 | 0.5693 | 12.7423 | 0.1746 | -626.5689 |
| MF0082 | Stroke              | Weighted median           | 11 | 1.0088 | 0.9640 | 1.0556 | 0.7060 | 0.0075  | 0.0127 | 0.5693 | 12.7423 | 0.1746 | -626.5689 |
| MF0082 | Stroke              | Inverse variance weighted | 11 | 0.9933 | 0.9575 | 1.0304 | 0.7179 | 0.0075  | 0.0127 | 0.5693 | 12.7423 | 0.1746 | -626.5689 |
| MF0082 | Stroke              | Simple mode               | 11 | 1.0304 | 0.9507 | 1.1168 | 0.4823 | 0.0075  | 0.0127 | 0.5693 | 12.7423 | 0.1746 | -626.5689 |
| MF0082 | Stroke              | Weighted mode             | 11 | 1.0320 | 0.9658 | 1.1027 | 0.3735 | 0.0075  | 0.0127 | 0.5693 | 12.7423 | 0.1746 | -626.5689 |
| MF0083 | CardioEmbolicStroke | MR Egger                  | 18 | 1.1219 | 0.8422 | 1.4945 | 0.4433 | -0.0371 | 0.0369 | 0.3299 | 12.5425 | 0.7662 | -115.0333 |
| MF0083 | CardioEmbolicStroke | Weighted median           | 18 | 1.0528 | 0.8881 | 1.2480 | 0.5532 | -0.0371 | 0.0369 | 0.3299 | 12.5425 | 0.7662 | -115.0333 |
| MF0083 | CardioEmbolicStroke | Inverse variance weighted | 18 | 0.9811 | 0.8721 | 1.1037 | 0.7512 | -0.0371 | 0.0369 | 0.3299 | 12.5425 | 0.7662 | -115.0333 |
| MF0083 | CardioEmbolicStroke | Simple mode               | 18 | 1.0261 | 0.7894 | 1.3337 | 0.8498 | -0.0371 | 0.0369 | 0.3299 | 12.5425 | 0.7662 | -115.0333 |
| MF0083 | CardioEmbolicStroke | Weighted mode             | 18 | 1.0479 | 0.8626 | 1.2731 | 0.6434 | -0.0371 | 0.0369 | 0.3299 | 12.5425 | 0.7662 | -115.0333 |
| MF0083 | IschemicStroke      | MR Egger                  | 59 | 0.9911 | 0.9712 | 1.0115 | 0.3922 | 0.0001  | 0.0049 | 0.9860 | 60.7688 | 0.3418 | -7.5673   |
| MF0083 | IschemicStroke      | Weighted median           | 59 | 0.9870 | 0.9689 | 1.0054 | 0.1650 | 0.0001  | 0.0049 | 0.9860 | 60.7688 | 0.3418 | -7.5673   |
| MF0083 | IschemicStroke      | Inverse variance weighted | 59 | 0.9912 | 0.9785 | 1.0041 | 0.1814 | 0.0001  | 0.0049 | 0.9860 | 60.7688 | 0.3418 | -7.5673   |
| MF0083 | IschemicStroke      | Simple mode               | 59 | 0.9879 | 0.9532 | 1.0239 | 0.5070 | 0.0001  | 0.0049 | 0.9860 | 60.7688 | 0.3418 | -7.5673   |
| MF0083 | IschemicStroke      | Weighted mode             | 59 | 0.9837 | 0.9560 | 1.0123 | 0.2663 | 0.0001  | 0.0049 | 0.9860 | 60.7688 | 0.3418 | -7.5673   |
| MF0083 | LargeArteryStroke   | MR Egger                  | 35 | 1.0127 | 0.9066 | 1.1313 | 0.8242 | 0.0022  | 0.0223 | 0.9212 | 57.4232 | 0.0053 | -1.6840   |
| MF0083 | LargeArteryStroke   | Weighted median           | 35 | 1.0192 | 0.9416 | 1.1031 | 0.6382 | 0.0022  | 0.0223 | 0.9212 | 57.4232 | 0.0053 | -1.6840   |
| MF0083 | LargeArteryStroke   | Inverse variance weighted | 35 | 1.0172 | 0.9502 | 1.0889 | 0.6239 | 0.0022  | 0.0223 | 0.9212 | 57.4232 | 0.0053 | -1.6840   |
| MF0083 | LargeArteryStroke   | Simple mode               | 35 | 1.0260 | 0.8910 | 1.1815 | 0.7234 | 0.0022  | 0.0223 | 0.9212 | 57.4232 | 0.0053 | -1.6840   |
| MF0083 | LargeArteryStroke   | Weighted mode             | 35 | 1.0067 | 0.9203 | 1.1013 | 0.8843 | 0.0022  | 0.0223 | 0.9212 | 57.4232 | 0.0053 | -1.6840   |
| MF0083 | SmallVesselStroke   | MR Egger                  | 42 | 0.9933 | 0.9543 | 1.0340 | 0.7456 | 0.0012  | 0.0089 | 0.8924 | 31.3067 | 0.8357 | -6.9402   |
| MF0083 | SmallVesselStroke   | Weighted median           | 42 | 0.9774 | 0.9418 | 1.0143 | 0.2268 | 0.0012  | 0.0089 | 0.8924 | 31.3067 | 0.8357 | -6.9402   |
| MF0083 | SmallVesselStroke   | Inverse variance weighted | 42 | 0.9955 | 0.9701 | 1.0214 | 0.7294 | 0.0012  | 0.0089 | 0.8924 | 31.3067 | 0.8357 | -6.9402   |
| MF0083 | SmallVesselStroke   | Simple mode               | 42 | 0.9903 | 0.9215 | 1.0643 | 0.7928 | 0.0012  | 0.0089 | 0.8924 | 31.3067 | 0.8357 | -6.9402   |
| MF0083 | SmallVesselStroke   | Weighted mode             | 42 | 0.9771 | 0.9197 | 1.0381 | 0.4577 | 0.0012  | 0.0089 | 0.8924 | 31.3067 | 0.8357 | -6.9402   |
| MF0083 | Stroke              | MR Egger                  | 56 | 0.9968 | 0.9724 | 1.0219 | 0.8040 | -0.0018 | 0.0049 | 0.7106 | 61.4757 | 0.2260 | -7.4136   |
| MF0083 | Stroke              | Weighted median           | 56 | 0.9915 | 0.9714 | 1.0121 | 0.4182 | -0.0018 | 0.0049 | 0.7106 | 61.4757 | 0.2260 | -7.4136   |
| MF0083 | Stroke              | Inverse variance weighted | 56 | 0.9931 | 0.9787 | 1.0076 | 0.3488 | -0.0018 | 0.0049 | 0.7106 | 61.4757 | 0.2260 | -7.4136   |
| MF0083 | Stroke              | Simple mode               | 56 | 0.9991 | 0.9606 | 1.0392 | 0.9652 | -0.0018 | 0.0049 | 0.7106 | 61.4757 | 0.2260 | -7.4136   |
| MF0083 | Stroke              | Weighted mode             | 56 | 0.9930 | 0.9633 | 1.0237 | 0.6527 | -0.0018 | 0.0049 | 0.7106 | 61.4757 | 0.2260 | -7.4136   |
| MF0084 | CardioEmbolicStroke | MR Egger                  | 12 | 0.9913 | 0.7988 | 1.2302 | 0.9385 | 0.0295  | 0.0515 | 0.5793 | 6.2934  | 0.7900 | -41.6644  |
| MF0084 | CardioEmbolicStroke | Weighted median           | 12 | 1.0465 | 0.9437 | 1.1605 | 0.3886 | 0.0295  | 0.0515 | 0.5793 | 6.2934  | 0.7900 | -41.6644  |
| MF0084 | CardioEmbolicStroke | Inverse variance weighted | 12 | 1.0514 | 0.9725 | 1.1368 | 0.2080 | 0.0295  | 0.0515 | 0.5793 | 6.2934  | 0.7900 | -41.6644  |
| MF0084 | CardioEmbolicStroke | Simple mode               | 12 | 1.0346 | 0.8792 | 1.2174 | 0.6901 | 0.0295  | 0.0515 | 0.5793 | 6.2934  | 0.7900 | -41.6644  |
| MF0084 | CardioEmbolicStroke | Weighted mode             | 12 | 1.0132 | 0.8827 | 1.1630 | 0.8556 | 0.0295  | 0.0515 | 0.5793 | 6.2934  | 0.7900 | -41.6644  |
| MF0084 | IschemicStroke      | MR Egger                  | 18 | 1.0005 | 0.9520 | 1.0514 | 0.9855 | -0.0043 | 0.0131 | 0.7461 | 26.0672 | 0.0531 | -61.6586  |
| MF0084 | IschemicStroke      | Weighted median           | 18 | 0.9838 | 0.9629 | 1.0052 | 0.1370 | -0.0043 | 0.0131 | 0.7461 | 26.0672 | 0.0531 | -61.6586  |
| MF0084 | IschemicStroke      | Inverse variance weighted | 18 | 0.9928 | 0.9739 | 1.0121 | 0.4635 | -0.0043 | 0.0131 | 0.7461 | 26.0672 | 0.0531 | -61.6586  |
| MF0084 | IschemicStroke      | Simple mode               | 18 | 0.9831 | 0.9512 | 1.0161 | 0.3252 | -0.0043 | 0.0131 | 0.7461 | 26.0672 | 0.0531 | -61.6586  |
| MF0084 | IschemicStroke      | Weighted mode             | 18 | 0.9841 | 0.9564 | 1.0125 | 0.2857 | -0.0043 | 0.0131 | 0.7461 | 26.0672 | 0.0531 | -61.6586  |
| MF0084 | LargeArteryStroke   | MR Egger                  | 14 | 1.0353 | 0.8655 | 1.2384 | 0.7111 | -0.0240 | 0.0442 | 0.5966 | 17.0792 | 0.1466 | -25.7192  |
| MF0084 | LargeArteryStroke   | Weighted median           | 14 | 1.0110 | 0.9344 | 1.0940 | 0.7850 | -0.0240 | 0.0442 | 0.5966 | 17.0792 | 0.1466 | -25.7192  |
| MF0084 | LargeArteryStroke   | Inverse variance weighted | 14 | 0.9885 | 0.9270 | 1.0541 | 0.7253 | -0.0240 | 0.0442 | 0.5966 | 17.0792 | 0.1466 | -25.7192  |
| MF0084 | LargeArteryStroke   | Simple mode               | 14 | 1.0506 | 0.9097 | 1.2132 | 0.5137 | -0.0240 | 0.0442 | 0.5966 | 17.0792 | 0.1466 | -25.7192  |
| MF0084 | LargeArteryStroke   | Weighted mode             | 14 | 1.0628 | 0.9472 | 1.1925 | 0.3189 | -0.0240 | 0.0442 | 0.5966 | 17.0792 | 0.1466 | -25.7192  |
| MF0084 | SmallVesselStroke   | MR Egger                  | 15 | 1.0036 | 0.9268 | 1.0867 | 0.9315 | 0.0040  | 0.0200 | 0.8447 | 9.0968  | 0.7656 | -70.8224  |

|        |                     |                           |    |        |        |         |        |         |        |        |         |        |            |
|--------|---------------------|---------------------------|----|--------|--------|---------|--------|---------|--------|--------|---------|--------|------------|
| MF0084 | SmallVesselStroke   | Weighted median           | 15 | 1.0194 | 0.9787 | 1.0618  | 0.3556 | 0.0040  | 0.0200 | 0.8447 | 9.0968  | 0.7656 | -70.8224   |
| MF0084 | SmallVesselStroke   | Inverse variance weighted | 15 | 1.0111 | 0.9812 | 1.0420  | 0.4706 | 0.0040  | 0.0200 | 0.8447 | 9.0968  | 0.7656 | -70.8224   |
| MF0084 | SmallVesselStroke   | Simple mode               | 15 | 1.0232 | 0.9547 | 1.0966  | 0.5265 | 0.0040  | 0.0200 | 0.8447 | 9.0968  | 0.7656 | -70.8224   |
| MF0084 | SmallVesselStroke   | Weighted mode             | 15 | 1.0219 | 0.9645 | 1.0828  | 0.4750 | 0.0040  | 0.0200 | 0.8447 | 9.0968  | 0.7656 | -70.8224   |
| MF0084 | Stroke              | MR Egger                  | 18 | 1.0012 | 0.9595 | 1.0448  | 0.9552 | -0.0088 | 0.0110 | 0.4380 | 24.1906 | 0.0854 | -68.0926   |
| MF0084 | Stroke              | Weighted median           | 18 | 0.9791 | 0.9599 | 0.9987  | 0.0372 | -0.0088 | 0.0110 | 0.4380 | 24.1906 | 0.0854 | -68.0926   |
| MF0084 | Stroke              | Inverse variance weighted | 18 | 0.9854 | 0.9694 | 1.0017  | 0.0786 | -0.0088 | 0.0110 | 0.4380 | 24.1906 | 0.0854 | -68.0926   |
| MF0084 | Stroke              | Simple mode               | 18 | 0.9751 | 0.9452 | 1.0061  | 0.1323 | -0.0088 | 0.0110 | 0.4380 | 24.1906 | 0.0854 | -68.0926   |
| MF0084 | Stroke              | Weighted mode             | 18 | 0.9777 | 0.9493 | 1.0070  | 0.1525 | -0.0088 | 0.0110 | 0.4380 | 24.1906 | 0.0854 | -68.0926   |
| MF0085 | CardioEmbolicStroke | MR Egger                  | 9  | 2.3942 | 0.6058 | 9.4622  | 0.2531 | -0.1401 | 0.1083 | 0.2366 | 12.1446 | 0.1449 | 13.9623    |
| MF0085 | CardioEmbolicStroke | Weighted median           | 9  | 1.1218 | 0.8028 | 1.5676  | 0.5008 | -0.1401 | 0.1083 | 0.2366 | 12.1446 | 0.1449 | 13.9623    |
| MF0085 | CardioEmbolicStroke | Inverse variance weighted | 9  | 0.9847 | 0.7358 | 1.3179  | 0.9176 | -0.1401 | 0.1083 | 0.2366 | 12.1446 | 0.1449 | 13.9623    |
| MF0085 | CardioEmbolicStroke | Simple mode               | 9  | 0.6358 | 0.3344 | 1.2088  | 0.2045 | -0.1401 | 0.1083 | 0.2366 | 12.1446 | 0.1449 | 13.9623    |
| MF0085 | CardioEmbolicStroke | Weighted mode             | 9  | 1.2214 | 0.6991 | 2.1340  | 0.5023 | -0.1401 | 0.1083 | 0.2366 | 12.1446 | 0.1449 | 13.9623    |
| MF0085 | IschemicStroke      | MR Egger                  | 16 | 0.9934 | 0.8896 | 1.1094  | 0.9083 | -0.0010 | 0.0109 | 0.9284 | 18.8513 | 0.1707 | -665.8624  |
| MF0085 | IschemicStroke      | Weighted median           | 16 | 0.9926 | 0.9360 | 1.0526  | 0.8041 | -0.0010 | 0.0109 | 0.9284 | 18.8513 | 0.1707 | -665.8624  |
| MF0085 | IschemicStroke      | Inverse variance weighted | 16 | 0.9888 | 0.9432 | 1.0367  | 0.6414 | -0.0010 | 0.0109 | 0.9284 | 18.8513 | 0.1707 | -665.8624  |
| MF0085 | IschemicStroke      | Simple mode               | 16 | 0.9812 | 0.8971 | 1.0731  | 0.6835 | -0.0010 | 0.0109 | 0.9284 | 18.8513 | 0.1707 | -665.8624  |
| MF0085 | IschemicStroke      | Weighted mode             | 16 | 0.9867 | 0.9084 | 1.0717  | 0.7551 | -0.0010 | 0.0109 | 0.9284 | 18.8513 | 0.1707 | -665.8624  |
| MF0085 | LargeArteryStroke   | MR Egger                  | 14 | 1.2089 | 0.8344 | 1.7515  | 0.3357 | -0.0441 | 0.0347 | 0.2270 | 14.5143 | 0.3386 | -2563.5083 |
| MF0085 | LargeArteryStroke   | Weighted median           | 14 | 1.0441 | 0.8594 | 1.2686  | 0.6637 | -0.0441 | 0.0347 | 0.2270 | 14.5143 | 0.3386 | -2563.5083 |
| MF0085 | LargeArteryStroke   | Inverse variance weighted | 14 | 0.9696 | 0.8324 | 1.1295  | 0.6922 | -0.0441 | 0.0347 | 0.2270 | 14.5143 | 0.3386 | -2563.5083 |
| MF0085 | LargeArteryStroke   | Simple mode               | 14 | 1.0451 | 0.7782 | 1.4034  | 0.7741 | -0.0441 | 0.0347 | 0.2270 | 14.5143 | 0.3386 | -2563.5083 |
| MF0085 | LargeArteryStroke   | Weighted mode             | 14 | 1.0588 | 0.7889 | 1.4210  | 0.7097 | -0.0441 | 0.0347 | 0.2270 | 14.5143 | 0.3386 | -2563.5083 |
| MF0085 | SmallVesselStroke   | MR Egger                  | 16 | 0.9764 | 0.8228 | 1.1586  | 0.7882 | 0.0008  | 0.0168 | 0.9620 | 7.5751  | 0.9103 | -280.3215  |
| MF0085 | SmallVesselStroke   | Weighted median           | 16 | 0.9883 | 0.8914 | 1.0957  | 0.8227 | 0.0008  | 0.0168 | 0.9620 | 7.5751  | 0.9103 | -280.3215  |
| MF0085 | SmallVesselStroke   | Inverse variance weighted | 16 | 0.9801 | 0.9086 | 1.0572  | 0.6025 | 0.0008  | 0.0168 | 0.9620 | 7.5751  | 0.9103 | -280.3215  |
| MF0085 | SmallVesselStroke   | Simple mode               | 16 | 1.0021 | 0.8423 | 1.1923  | 0.9813 | 0.0008  | 0.0168 | 0.9620 | 7.5751  | 0.9103 | -280.3215  |
| MF0085 | SmallVesselStroke   | Weighted mode             | 16 | 1.0118 | 0.8741 | 1.1711  | 0.8776 | 0.0008  | 0.0168 | 0.9620 | 7.5751  | 0.9103 | -280.3215  |
| MF0085 | Stroke              | MR Egger                  | 17 | 1.0171 | 0.9394 | 1.1012  | 0.6818 | -0.0066 | 0.0079 | 0.4140 | 11.8338 | 0.6916 | -452.7807  |
| MF0085 | Stroke              | Weighted median           | 17 | 0.9849 | 0.9401 | 1.0319  | 0.5230 | -0.0066 | 0.0079 | 0.4140 | 11.8338 | 0.6916 | -452.7807  |
| MF0085 | Stroke              | Inverse variance weighted | 17 | 0.9866 | 0.9521 | 1.0223  | 0.4569 | -0.0066 | 0.0079 | 0.4140 | 11.8338 | 0.6916 | -452.7807  |
| MF0085 | Stroke              | Simple mode               | 17 | 0.9777 | 0.8994 | 1.0628  | 0.6041 | -0.0066 | 0.0079 | 0.4140 | 11.8338 | 0.6916 | -452.7807  |
| MF0085 | Stroke              | Weighted mode             | 17 | 0.9821 | 0.9061 | 1.0644  | 0.6658 | -0.0066 | 0.0079 | 0.4140 | 11.8338 | 0.6916 | -452.7807  |
| MF0086 | CardioEmbolicStroke | MR Egger                  | 6  | 0.0392 | 0.0000 | 97.9419 | 0.4626 | 0.0670  | 0.1118 | 0.5810 | 4.6653  | 0.3234 | 7.6101     |
| MF0086 | CardioEmbolicStroke | Weighted median           | 6  | 0.3755 | 0.0379 | 3.7214  | 0.4025 | 0.0670  | 0.1118 | 0.5810 | 4.6653  | 0.3234 | 7.6101     |
| MF0086 | CardioEmbolicStroke | Inverse variance weighted | 6  | 0.3984 | 0.0654 | 2.4289  | 0.3184 | 0.0670  | 0.1118 | 0.5810 | 4.6653  | 0.3234 | 7.6101     |
| MF0086 | CardioEmbolicStroke | Simple mode               | 6  | 0.2121 | 0.0055 | 8.1504  | 0.4428 | 0.0670  | 0.1118 | 0.5810 | 4.6653  | 0.3234 | 7.6101     |
| MF0086 | CardioEmbolicStroke | Weighted mode             | 6  | 0.1938 | 0.0104 | 3.6035  | 0.3213 | 0.0670  | 0.1118 | 0.5810 | 4.6653  | 0.3234 | 7.6101     |
| MF0086 | IschemicStroke      | MR Egger                  | 11 | 1.0971 | 0.6002 | 2.0054  | 0.7701 | -0.0108 | 0.0118 | 0.3825 | 10.8978 | 0.2828 | 3.4685     |
| MF0086 | IschemicStroke      | Weighted median           | 11 | 0.8747 | 0.5713 | 1.3393  | 0.5381 | -0.0108 | 0.0118 | 0.3825 | 10.8978 | 0.2828 | 3.4685     |
| MF0086 | IschemicStroke      | Inverse variance weighted | 11 | 0.8629 | 0.6294 | 1.1831  | 0.3599 | -0.0108 | 0.0118 | 0.3825 | 10.8978 | 0.2828 | 3.4685     |
| MF0086 | IschemicStroke      | Simple mode               | 11 | 0.7476 | 0.3328 | 1.6794  | 0.4972 | -0.0108 | 0.0118 | 0.3825 | 10.8978 | 0.2828 | 3.4685     |
| MF0086 | IschemicStroke      | Weighted mode             | 11 | 1.2412 | 0.6406 | 2.4046  | 0.5364 | -0.0108 | 0.0118 | 0.3825 | 10.8978 | 0.2828 | 3.4685     |
| MF0086 | LargeArteryStroke   | MR Egger                  | 8  | 0.1476 | 0.0017 | 12.9645 | 0.4342 | 0.0433  | 0.0706 | 0.5626 | 10.9539 | 0.0898 | 3.4341     |
| MF0086 | LargeArteryStroke   | Weighted median           | 8  | 1.0690 | 0.1975 | 5.7843  | 0.9383 | 0.0433  | 0.0706 | 0.5626 | 10.9539 | 0.0898 | 3.4341     |
| MF0086 | LargeArteryStroke   | Inverse variance weighted | 8  | 0.5447 | 0.1175 | 2.5239  | 0.4374 | 0.0433  | 0.0706 | 0.5626 | 10.9539 | 0.0898 | 3.4341     |
| MF0086 | LargeArteryStroke   | Simple mode               | 8  | 1.9964 | 0.1119 | 35.6144 | 0.6525 | 0.0433  | 0.0706 | 0.5626 | 10.9539 | 0.0898 | 3.4341     |
| MF0086 | LargeArteryStroke   | Weighted mode             | 8  | 1.6113 | 0.0922 | 28.1665 | 0.7534 | 0.0433  | 0.0706 | 0.5626 | 10.9539 | 0.0898 | 3.4341     |
| MF0086 | SmallVesselStroke   | MR Egger                  | 8  | 0.8630 | 0.1424 | 5.2319  | 0.8780 | -0.0078 | 0.0286 | 0.7946 | 5.0603  | 0.5361 | 1.2103     |
| MF0086 | SmallVesselStroke   | Weighted median           | 8  | 0.6745 | 0.2799 | 1.6253  | 0.3802 | -0.0078 | 0.0286 | 0.7946 | 5.0603  | 0.5361 | 1.2103     |
| MF0086 | SmallVesselStroke   | Inverse variance weighted | 8  | 0.6835 | 0.3557 | 1.3133  | 0.2534 | -0.0078 | 0.0286 | 0.7946 | 5.0603  | 0.5361 | 1.2103     |
| MF0086 | SmallVesselStroke   | Simple mode               | 8  | 0.5158 | 0.1235 | 2.1544  | 0.3942 | -0.0078 | 0.0286 | 0.7946 | 5.0603  | 0.5361 | 1.2103     |

|        |                     |                           |    |        |        |        |        |         |        |        |         |        |             |
|--------|---------------------|---------------------------|----|--------|--------|--------|--------|---------|--------|--------|---------|--------|-------------|
| MF0086 | SmallVesselStroke   | Weighted mode             | 8  | 0.9074 | 0.2672 | 3.0819 | 0.8807 | -0.0078 | 0.0286 | 0.7946 | 5.0603  | 0.5361 | 1.2103      |
| MF0086 | Stroke              | MR Egger                  | 12 | 1.0039 | 0.4999 | 2.0158 | 0.9916 | -0.0062 | 0.0115 | 0.5990 | 8.5524  | 0.5750 | 5.1462      |
| MF0086 | Stroke              | Weighted median           | 12 | 0.7611 | 0.5198 | 1.1143 | 0.1604 | -0.0062 | 0.0115 | 0.5990 | 8.5524  | 0.5750 | 5.1462      |
| MF0086 | Stroke              | Inverse variance weighted | 12 | 0.8418 | 0.6319 | 1.1214 | 0.2392 | -0.0062 | 0.0115 | 0.5990 | 8.5524  | 0.5750 | 5.1462      |
| MF0086 | Stroke              | Simple mode               | 12 | 0.7637 | 0.4402 | 1.3248 | 0.3580 | -0.0062 | 0.0115 | 0.5990 | 8.5524  | 0.5750 | 5.1462      |
| MF0086 | Stroke              | Weighted mode             | 12 | 0.7484 | 0.4617 | 1.2130 | 0.2643 | -0.0062 | 0.0115 | 0.5990 | 8.5524  | 0.5750 | 5.1462      |
| MF0087 | CardioEmbolicStroke | MR Egger                  | 8  | 1.1058 | 0.5000 | 2.4455 | 0.8122 | -0.0347 | 0.0563 | 0.5599 | 6.6976  | 0.3497 | 12.9365     |
| MF0087 | CardioEmbolicStroke | Weighted median           | 8  | 0.9863 | 0.6312 | 1.5411 | 0.9517 | -0.0347 | 0.0563 | 0.5599 | 6.6976  | 0.3497 | 12.9365     |
| MF0087 | CardioEmbolicStroke | Inverse variance weighted | 8  | 0.8850 | 0.6278 | 1.2475 | 0.4855 | -0.0347 | 0.0563 | 0.5599 | 6.6976  | 0.3497 | 12.9365     |
| MF0087 | CardioEmbolicStroke | Simple mode               | 8  | 1.1186 | 0.6395 | 1.9565 | 0.7061 | -0.0347 | 0.0563 | 0.5599 | 6.6976  | 0.3497 | 12.9365     |
| MF0087 | CardioEmbolicStroke | Weighted mode             | 8  | 1.0207 | 0.6524 | 1.5968 | 0.9311 | -0.0347 | 0.0563 | 0.5599 | 6.6976  | 0.3497 | 12.9365     |
| MF0087 | IschemicStroke      | MR Egger                  | 13 | 0.8729 | 0.7483 | 1.0182 | 0.1115 | 0.0206  | 0.0119 | 0.1117 | 15.4850 | 0.2160 | 454.8819    |
| MF0087 | IschemicStroke      | Weighted median           | 13 | 0.9394 | 0.8539 | 1.0335 | 0.1996 | 0.0206  | 0.0119 | 0.1117 | 15.4850 | 0.2160 | 454.8819    |
| MF0087 | IschemicStroke      | Inverse variance weighted | 13 | 0.9845 | 0.9113 | 1.0635 | 0.6912 | 0.0206  | 0.0119 | 0.1117 | 15.4850 | 0.2160 | 454.8819    |
| MF0087 | IschemicStroke      | Simple mode               | 13 | 0.9081 | 0.7863 | 1.0488 | 0.2143 | 0.0206  | 0.0119 | 0.1117 | 15.4850 | 0.2160 | 454.8819    |
| MF0087 | IschemicStroke      | Weighted mode             | 13 | 0.9255 | 0.8297 | 1.0324 | 0.1902 | 0.0206  | 0.0119 | 0.1117 | 15.4850 | 0.2160 | 454.8819    |
| MF0087 | LargeArteryStroke   | MR Egger                  | 11 | 1.5473 | 0.9336 | 2.5645 | 0.1246 | -0.0535 | 0.0379 | 0.1920 | 6.3845  | 0.7820 | 65.1129     |
| MF0087 | LargeArteryStroke   | Weighted median           | 11 | 1.2438 | 0.9088 | 1.7023 | 0.1730 | -0.0535 | 0.0379 | 0.1920 | 6.3845  | 0.7820 | 65.1129     |
| MF0087 | LargeArteryStroke   | Inverse variance weighted | 11 | 1.1202 | 0.8882 | 1.4127 | 0.3377 | -0.0535 | 0.0379 | 0.1920 | 6.3845  | 0.7820 | 65.1129     |
| MF0087 | LargeArteryStroke   | Simple mode               | 11 | 1.2331 | 0.7761 | 1.9590 | 0.3959 | -0.0535 | 0.0379 | 0.1920 | 6.3845  | 0.7820 | 65.1129     |
| MF0087 | LargeArteryStroke   | Weighted mode             | 11 | 1.2849 | 0.9059 | 1.8225 | 0.1901 | -0.0535 | 0.0379 | 0.1920 | 6.3845  | 0.7820 | 65.1129     |
| MF0087 | SmallVesselStroke   | MR Egger                  | 12 | 0.8099 | 0.6083 | 1.0784 | 0.1796 | 0.0301  | 0.0219 | 0.1988 | 13.3801 | 0.2692 | 81.8957     |
| MF0087 | SmallVesselStroke   | Weighted median           | 12 | 1.0075 | 0.8439 | 1.2029 | 0.9342 | 0.0301  | 0.0219 | 0.1988 | 13.3801 | 0.2692 | 81.8957     |
| MF0087 | SmallVesselStroke   | Inverse variance weighted | 12 | 0.9680 | 0.8437 | 1.1107 | 0.6432 | 0.0301  | 0.0219 | 0.1988 | 13.3801 | 0.2692 | 81.8957     |
| MF0087 | SmallVesselStroke   | Simple mode               | 12 | 1.0478 | 0.7887 | 1.3920 | 0.7535 | 0.0301  | 0.0219 | 0.1988 | 13.3801 | 0.2692 | 81.8957     |
| MF0087 | SmallVesselStroke   | Weighted mode             | 12 | 1.0057 | 0.8154 | 1.2403 | 0.9589 | 0.0301  | 0.0219 | 0.1988 | 13.3801 | 0.2692 | 81.8957     |
| MF0087 | Stroke              | MR Egger                  | 14 | 0.8995 | 0.7897 | 1.0246 | 0.1370 | 0.0154  | 0.0099 | 0.1441 | 14.7786 | 0.3214 | 1139.6916   |
| MF0087 | Stroke              | Weighted median           | 14 | 0.9497 | 0.8650 | 1.0427 | 0.2787 | 0.0154  | 0.0099 | 0.1441 | 14.7786 | 0.3214 | 1139.6916   |
| MF0087 | Stroke              | Inverse variance weighted | 14 | 0.9860 | 0.9248 | 1.0513 | 0.6669 | 0.0154  | 0.0099 | 0.1441 | 14.7786 | 0.3214 | 1139.6916   |
| MF0087 | Stroke              | Simple mode               | 14 | 0.9312 | 0.7999 | 1.0841 | 0.3751 | 0.0154  | 0.0099 | 0.1441 | 14.7786 | 0.3214 | 1139.6916   |
| MF0087 | Stroke              | Weighted mode             | 14 | 0.9362 | 0.8272 | 1.0595 | 0.3153 | 0.0154  | 0.0099 | 0.1441 | 14.7786 | 0.3214 | 1139.6916   |
| MF0088 | CardioEmbolicStroke | MR Egger                  | 10 | 0.8062 | 0.1559 | 4.1684 | 0.8037 | 0.0286  | 0.0747 | 0.7114 | 14.1982 | 0.0767 | 2.0442      |
| MF0088 | CardioEmbolicStroke | Weighted median           | 10 | 0.7837 | 0.4000 | 1.5356 | 0.4776 | 0.0286  | 0.0747 | 0.7114 | 14.1982 | 0.0767 | 2.0442      |
| MF0088 | CardioEmbolicStroke | Inverse variance weighted | 10 | 1.0869 | 0.6111 | 1.9331 | 0.7767 | 0.0286  | 0.0747 | 0.7114 | 14.1982 | 0.0767 | 2.0442      |
| MF0088 | CardioEmbolicStroke | Simple mode               | 10 | 0.5173 | 0.1334 | 2.0052 | 0.3652 | 0.0286  | 0.0747 | 0.7114 | 14.1982 | 0.0767 | 2.0442      |
| MF0088 | CardioEmbolicStroke | Weighted mode             | 10 | 0.6011 | 0.1954 | 1.8497 | 0.3979 | 0.0286  | 0.0747 | 0.7114 | 14.1982 | 0.0767 | 2.0442      |
| MF0088 | IschemicStroke      | MR Egger                  | 30 | 0.9805 | 0.8891 | 1.0812 | 0.6959 | 0.0013  | 0.0072 | 0.8586 | 25.3692 | 0.6077 | -390.5361   |
| MF0088 | IschemicStroke      | Weighted median           | 30 | 1.0022 | 0.9248 | 1.0862 | 0.9568 | 0.0013  | 0.0072 | 0.8586 | 25.3692 | 0.6077 | -390.5361   |
| MF0088 | IschemicStroke      | Inverse variance weighted | 30 | 0.9877 | 0.9339 | 1.0447 | 0.6658 | 0.0013  | 0.0072 | 0.8586 | 25.3692 | 0.6077 | -390.5361   |
| MF0088 | IschemicStroke      | Simple mode               | 30 | 0.9801 | 0.8427 | 1.1398 | 0.7956 | 0.0013  | 0.0072 | 0.8586 | 25.3692 | 0.6077 | -390.5361   |
| MF0088 | IschemicStroke      | Weighted mode             | 30 | 1.0026 | 0.8950 | 1.1232 | 0.9644 | 0.0013  | 0.0072 | 0.8586 | 25.3692 | 0.6077 | -390.5361   |
| MF0088 | LargeArteryStroke   | MR Egger                  | 21 | 1.0689 | 0.7210 | 1.5847 | 0.7436 | 0.0049  | 0.0257 | 0.8493 | 6.6113  | 0.9960 | 863.5738    |
| MF0088 | LargeArteryStroke   | Weighted median           | 21 | 1.0377 | 0.7775 | 1.3850 | 0.8017 | 0.0049  | 0.0257 | 0.8493 | 6.6113  | 0.9960 | 863.5738    |
| MF0088 | LargeArteryStroke   | Inverse variance weighted | 21 | 1.1042 | 0.8912 | 1.3681 | 0.3646 | 0.0049  | 0.0257 | 0.8493 | 6.6113  | 0.9960 | 863.5738    |
| MF0088 | LargeArteryStroke   | Simple mode               | 21 | 1.2862 | 0.8433 | 1.9618 | 0.2562 | 0.0049  | 0.0257 | 0.8493 | 6.6113  | 0.9960 | 863.5738    |
| MF0088 | LargeArteryStroke   | Weighted mode             | 21 | 1.0102 | 0.6705 | 1.5221 | 0.9618 | 0.0049  | 0.0257 | 0.8493 | 6.6113  | 0.9960 | 863.5738    |
| MF0088 | SmallVesselStroke   | MR Egger                  | 25 | 1.1009 | 0.8964 | 1.3521 | 0.3687 | -0.0072 | 0.0140 | 0.6141 | 22.8460 | 0.4698 | -1589.8070  |
| MF0088 | SmallVesselStroke   | Weighted median           | 25 | 1.0453 | 0.8883 | 1.2300 | 0.5937 | -0.0072 | 0.0140 | 0.6141 | 22.8460 | 0.4698 | -1589.8070  |
| MF0088 | SmallVesselStroke   | Inverse variance weighted | 25 | 1.0526 | 0.9407 | 1.1779 | 0.3712 | -0.0072 | 0.0140 | 0.6141 | 22.8460 | 0.4698 | -1589.8070  |
| MF0088 | SmallVesselStroke   | Simple mode               | 25 | 1.0760 | 0.7708 | 1.5020 | 0.6707 | -0.0072 | 0.0140 | 0.6141 | 22.8460 | 0.4698 | -1589.8070  |
| MF0088 | SmallVesselStroke   | Weighted mode             | 25 | 1.0439 | 0.7955 | 1.3698 | 0.7593 | -0.0072 | 0.0140 | 0.6141 | 22.8460 | 0.4698 | -1589.8070  |
| MF0088 | Stroke              | MR Egger                  | 28 | 0.9694 | 0.8488 | 1.1071 | 0.6502 | -0.0001 | 0.0084 | 0.9893 | 34.2388 | 0.1291 | -90970.3767 |
| MF0088 | Stroke              | Weighted median           | 28 | 0.9442 | 0.8645 | 1.0313 | 0.2019 | -0.0001 | 0.0084 | 0.9893 | 34.2388 | 0.1291 | -90970.3767 |

|        |                     |                           |    |        |        |        |        |         |        |        |         |        |                |
|--------|---------------------|---------------------------|----|--------|--------|--------|--------|---------|--------|--------|---------|--------|----------------|
| MF0088 | Stroke              | Inverse variance weighted | 28 | 0.9686 | 0.9084 | 1.0329 | 0.3306 | -0.0001 | 0.0084 | 0.9893 | 34.2388 | 0.1291 | -90970.3767    |
| MF0088 | Stroke              | Simple mode               | 28 | 0.9416 | 0.7779 | 1.1398 | 0.5423 | -0.0001 | 0.0084 | 0.9893 | 34.2388 | 0.1291 | -90970.3767    |
| MF0088 | Stroke              | Weighted mode             | 28 | 0.9187 | 0.7376 | 1.1444 | 0.4560 | -0.0001 | 0.0084 | 0.9893 | 34.2388 | 0.1291 | -90970.3767    |
| MF0089 | CardioEmbolicStroke | MR Egger                  | 7  | 0.4484 | 0.1549 | 1.2981 | 0.1992 | 0.1143  | 0.0696 | 0.1612 | 5.0905  | 0.5323 | 14.3270        |
| MF0089 | CardioEmbolicStroke | Weighted median           | 7  | 0.9676 | 0.5940 | 1.5764 | 0.8949 | 0.1143  | 0.0696 | 0.1612 | 5.0905  | 0.5323 | 14.3270        |
| MF0089 | CardioEmbolicStroke | Inverse variance weighted | 7  | 1.0328 | 0.7104 | 1.5013 | 0.8659 | 0.1143  | 0.0696 | 0.1612 | 5.0905  | 0.5323 | 14.3270        |
| MF0089 | CardioEmbolicStroke | Simple mode               | 7  | 0.8402 | 0.3995 | 1.7671 | 0.6624 | 0.1143  | 0.0696 | 0.1612 | 5.0905  | 0.5323 | 14.3270        |
| MF0089 | CardioEmbolicStroke | Weighted mode             | 7  | 0.8201 | 0.4160 | 1.6171 | 0.5878 | 0.1143  | 0.0696 | 0.1612 | 5.0905  | 0.5323 | 14.3270        |
| MF0089 | IschemicStroke      | MR Egger                  | 14 | 0.9966 | 0.9055 | 1.0969 | 0.9456 | -0.0021 | 0.0091 | 0.8171 | 5.5417  | 0.9374 | -740.4325      |
| MF0089 | IschemicStroke      | Weighted median           | 14 | 0.9860 | 0.9170 | 1.0602 | 0.7032 | -0.0021 | 0.0091 | 0.8171 | 5.5417  | 0.9374 | -740.4325      |
| MF0089 | IschemicStroke      | Inverse variance weighted | 14 | 0.9873 | 0.9333 | 1.0444 | 0.6560 | -0.0021 | 0.0091 | 0.8171 | 5.5417  | 0.9374 | -740.4325      |
| MF0089 | IschemicStroke      | Simple mode               | 14 | 0.9794 | 0.8750 | 1.0961 | 0.7226 | -0.0021 | 0.0091 | 0.8171 | 5.5417  | 0.9374 | -740.4325      |
| MF0089 | IschemicStroke      | Weighted mode             | 14 | 0.9832 | 0.8820 | 1.0961 | 0.7649 | -0.0021 | 0.0091 | 0.8171 | 5.5417  | 0.9374 | -740.4325      |
| MF0089 | LargeArteryStroke   | MR Egger                  | 10 | 0.9170 | 0.5785 | 1.4533 | 0.7218 | 0.0333  | 0.0357 | 0.3788 | 5.9595  | 0.6518 | 381.8138       |
| MF0089 | LargeArteryStroke   | Weighted median           | 10 | 1.0585 | 0.7839 | 1.4293 | 0.7105 | 0.0333  | 0.0357 | 0.3788 | 5.9595  | 0.6518 | 381.8138       |
| MF0089 | LargeArteryStroke   | Inverse variance weighted | 10 | 1.1090 | 0.8828 | 1.3933 | 0.3741 | 0.0333  | 0.0357 | 0.3788 | 5.9595  | 0.6518 | 381.8138       |
| MF0089 | LargeArteryStroke   | Simple mode               | 10 | 1.0588 | 0.6755 | 1.6596 | 0.8088 | 0.0333  | 0.0357 | 0.3788 | 5.9595  | 0.6518 | 381.8138       |
| MF0089 | LargeArteryStroke   | Weighted mode             | 10 | 1.0627 | 0.6945 | 1.6262 | 0.7856 | 0.0333  | 0.0357 | 0.3788 | 5.9595  | 0.6518 | 381.8138       |
| MF0089 | SmallVesselStroke   | MR Egger                  | 13 | 0.9628 | 0.7970 | 1.1631 | 0.7017 | -0.0080 | 0.0170 | 0.6480 | 3.5903  | 0.9804 | -1196.1483     |
| MF0089 | SmallVesselStroke   | Weighted median           | 13 | 0.9184 | 0.7960 | 1.0597 | 0.2439 | -0.0080 | 0.0170 | 0.6480 | 3.5903  | 0.9804 | -1196.1483     |
| MF0089 | SmallVesselStroke   | Inverse variance weighted | 13 | 0.9276 | 0.8333 | 1.0326 | 0.1694 | -0.0080 | 0.0170 | 0.6480 | 3.5903  | 0.9804 | -1196.1483     |
| MF0089 | SmallVesselStroke   | Simple mode               | 13 | 0.8813 | 0.6951 | 1.1174 | 0.3173 | -0.0080 | 0.0170 | 0.6480 | 3.5903  | 0.9804 | -1196.1483     |
| MF0089 | SmallVesselStroke   | Weighted mode             | 13 | 0.8693 | 0.6952 | 1.0869 | 0.2427 | -0.0080 | 0.0170 | 0.6480 | 3.5903  | 0.9804 | -1196.1483     |
| MF0089 | Stroke              | MR Egger                  | 11 | 0.9932 | 0.8427 | 1.1706 | 0.9366 | 0.0004  | 0.0115 | 0.9703 | 5.1209  | 0.8236 | 267.1413       |
| MF0089 | Stroke              | Weighted median           | 11 | 0.9955 | 0.9168 | 1.0809 | 0.9143 | 0.0004  | 0.0115 | 0.9703 | 5.1209  | 0.8236 | 267.1413       |
| MF0089 | Stroke              | Inverse variance weighted | 11 | 0.9961 | 0.9330 | 1.0634 | 0.9065 | 0.0004  | 0.0115 | 0.9703 | 5.1209  | 0.8236 | 267.1413       |
| MF0089 | Stroke              | Simple mode               | 11 | 0.9931 | 0.8677 | 1.1367 | 0.9222 | 0.0004  | 0.0115 | 0.9703 | 5.1209  | 0.8236 | 267.1413       |
| MF0089 | Stroke              | Weighted mode             | 11 | 1.0117 | 0.8925 | 1.1468 | 0.8593 | 0.0004  | 0.0115 | 0.9703 | 5.1209  | 0.8236 | 267.1413       |
| MF0090 | CardioEmbolicStroke | MR Egger                  | 12 | 1.5276 | 0.7063 | 3.3040 | 0.3070 | -0.0373 | 0.0494 | 0.4684 | 13.0406 | 0.2214 | 5.7638         |
| MF0090 | CardioEmbolicStroke | Weighted median           | 12 | 1.2688 | 0.8126 | 1.9810 | 0.2950 | -0.0373 | 0.0494 | 0.4684 | 13.0406 | 0.2214 | 5.7638         |
| MF0090 | CardioEmbolicStroke | Inverse variance weighted | 12 | 1.1747 | 0.8270 | 1.6686 | 0.3686 | -0.0373 | 0.0494 | 0.4684 | 13.0406 | 0.2214 | 5.7638         |
| MF0090 | CardioEmbolicStroke | Simple mode               | 12 | 1.5103 | 0.7568 | 3.0140 | 0.2669 | -0.0373 | 0.0494 | 0.4684 | 13.0406 | 0.2214 | 5.7638         |
| MF0090 | CardioEmbolicStroke | Weighted mode             | 12 | 1.4364 | 0.8739 | 2.3611 | 0.1810 | -0.0373 | 0.0494 | 0.4684 | 13.0406 | 0.2214 | 5.7638         |
| MF0090 | IschemicStroke      | MR Egger                  | 21 | 1.0260 | 0.9416 | 1.1180 | 0.5647 | -0.0007 | 0.0074 | 0.9260 | 16.0060 | 0.6569 | -691.6547      |
| MF0090 | IschemicStroke      | Weighted median           | 21 | 1.0129 | 0.9397 | 1.0917 | 0.7385 | -0.0007 | 0.0074 | 0.9260 | 16.0060 | 0.6569 | -691.6547      |
| MF0090 | IschemicStroke      | Inverse variance weighted | 21 | 1.0226 | 0.9716 | 1.0763 | 0.3913 | -0.0007 | 0.0074 | 0.9260 | 16.0060 | 0.6569 | -691.6547      |
| MF0090 | IschemicStroke      | Simple mode               | 21 | 0.9956 | 0.8737 | 1.1344 | 0.9477 | -0.0007 | 0.0074 | 0.9260 | 16.0060 | 0.6569 | -691.6547      |
| MF0090 | IschemicStroke      | Weighted mode             | 21 | 1.0130 | 0.9211 | 1.1140 | 0.7929 | -0.0007 | 0.0074 | 0.9260 | 16.0060 | 0.6569 | -691.6547      |
| MF0090 | LargeArteryStroke   | MR Egger                  | 16 | 1.1558 | 0.8613 | 1.5512 | 0.3510 | -0.0219 | 0.0244 | 0.3855 | 9.0863  | 0.8730 | -9602.7088     |
| MF0090 | LargeArteryStroke   | Weighted median           | 16 | 1.1262 | 0.8902 | 1.4249 | 0.3218 | -0.0219 | 0.0244 | 0.3855 | 9.0863  | 0.8730 | -9602.7088     |
| MF0090 | LargeArteryStroke   | Inverse variance weighted | 16 | 1.0375 | 0.8707 | 1.2364 | 0.6804 | -0.0219 | 0.0244 | 0.3855 | 9.0863  | 0.8730 | -9602.7088     |
| MF0090 | LargeArteryStroke   | Simple mode               | 16 | 1.1067 | 0.7985 | 1.5337 | 0.5518 | -0.0219 | 0.0244 | 0.3855 | 9.0863  | 0.8730 | -9602.7088     |
| MF0090 | LargeArteryStroke   | Weighted mode             | 16 | 1.1273 | 0.8759 | 1.4508 | 0.3667 | -0.0219 | 0.0244 | 0.3855 | 9.0863  | 0.8730 | -9602.7088     |
| MF0090 | SmallVesselStroke   | MR Egger                  | 17 | 1.0179 | 0.8657 | 1.1968 | 0.8333 | 0.0035  | 0.0136 | 0.7997 | 11.1500 | 0.7419 | -4755.4032     |
| MF0090 | SmallVesselStroke   | Weighted median           | 17 | 1.0358 | 0.9031 | 1.1880 | 0.6152 | 0.0035  | 0.0136 | 0.7997 | 11.1500 | 0.7419 | -4755.4032     |
| MF0090 | SmallVesselStroke   | Inverse variance weighted | 17 | 1.0355 | 0.9403 | 1.1403 | 0.4788 | 0.0035  | 0.0136 | 0.7997 | 11.1500 | 0.7419 | -4755.4032     |
| MF0090 | SmallVesselStroke   | Simple mode               | 17 | 1.0416 | 0.8475 | 1.2800 | 0.7036 | 0.0035  | 0.0136 | 0.7997 | 11.1500 | 0.7419 | -4755.4032     |
| MF0090 | SmallVesselStroke   | Weighted mode             | 17 | 1.0030 | 0.8518 | 1.1809 | 0.9720 | 0.0035  | 0.0136 | 0.7997 | 11.1500 | 0.7419 | -4755.4032     |
| MF0090 | Stroke              | MR Egger                  | 20 | 1.0186 | 0.9192 | 1.1288 | 0.7286 | -0.0004 | 0.0075 | 0.9537 | 17.0078 | 0.5226 | -26531858.4141 |
| MF0090 | Stroke              | Weighted median           | 20 | 1.0275 | 0.9496 | 1.1119 | 0.4997 | -0.0004 | 0.0075 | 0.9537 | 17.0078 | 0.5226 | -26531858.4141 |
| MF0090 | Stroke              | Inverse variance weighted | 20 | 1.0159 | 0.9640 | 1.0707 | 0.5549 | -0.0004 | 0.0075 | 0.9537 | 17.0078 | 0.5226 | -26531858.4141 |
| MF0090 | Stroke              | Simple mode               | 20 | 0.9750 | 0.8415 | 1.1296 | 0.7395 | -0.0004 | 0.0075 | 0.9537 | 17.0078 | 0.5226 | -26531858.4141 |
| MF0090 | Stroke              | Weighted mode             | 20 | 1.0338 | 0.9267 | 1.1533 | 0.5581 | -0.0004 | 0.0075 | 0.9537 | 17.0078 | 0.5226 | -26531858.4141 |

|        |                     |                           |    |        |        |        |        |         |        |        |         |        |             |
|--------|---------------------|---------------------------|----|--------|--------|--------|--------|---------|--------|--------|---------|--------|-------------|
| MF0091 | CardioEmbolicStroke | MR Egger                  | 10 | 1.3549 | 0.6108 | 3.0056 | 0.4763 | -0.0077 | 0.0543 | 0.8908 | 10.4974 | 0.2318 | 5.5543      |
| MF0091 | CardioEmbolicStroke | Weighted median           | 10 | 1.2778 | 0.8035 | 2.0319 | 0.3004 | -0.0077 | 0.0543 | 0.8908 | 10.4974 | 0.2318 | 5.5543      |
| MF0091 | CardioEmbolicStroke | Inverse variance weighted | 10 | 1.2879 | 0.9022 | 1.8384 | 0.1635 | -0.0077 | 0.0543 | 0.8908 | 10.4974 | 0.2318 | 5.5543      |
| MF0091 | CardioEmbolicStroke | Simple mode               | 10 | 1.5862 | 0.8166 | 3.0813 | 0.2064 | -0.0077 | 0.0543 | 0.8908 | 10.4974 | 0.2318 | 5.5543      |
| MF0091 | CardioEmbolicStroke | Weighted mode             | 10 | 1.4377 | 0.8603 | 2.4027 | 0.1992 | -0.0077 | 0.0543 | 0.8908 | 10.4974 | 0.2318 | 5.5543      |
| MF0091 | IschemicStroke      | MR Egger                  | 18 | 1.0207 | 0.9341 | 1.1153 | 0.6565 | 0.0009  | 0.0083 | 0.9159 | 15.2937 | 0.5032 | -848.3660   |
| MF0091 | IschemicStroke      | Weighted median           | 18 | 1.0132 | 0.9391 | 1.0932 | 0.7345 | 0.0009  | 0.0083 | 0.9159 | 15.2937 | 0.5032 | -848.3660   |
| MF0091 | IschemicStroke      | Inverse variance weighted | 18 | 1.0247 | 0.9721 | 1.0802 | 0.3645 | 0.0009  | 0.0083 | 0.9159 | 15.2937 | 0.5032 | -848.3660   |
| MF0091 | IschemicStroke      | Simple mode               | 18 | 1.0033 | 0.8915 | 1.1290 | 0.9575 | 0.0009  | 0.0083 | 0.9159 | 15.2937 | 0.5032 | -848.3660   |
| MF0091 | IschemicStroke      | Weighted mode             | 18 | 1.0143 | 0.9211 | 1.1170 | 0.7758 | 0.0009  | 0.0083 | 0.9159 | 15.2937 | 0.5032 | -848.3660   |
| MF0091 | LargeArteryStroke   | MR Egger                  | 14 | 1.1501 | 0.8504 | 1.5554 | 0.3817 | -0.0174 | 0.0270 | 0.5318 | 5.0727  | 0.9555 | -22649.1029 |
| MF0091 | LargeArteryStroke   | Weighted median           | 14 | 1.1274 | 0.8996 | 1.4128 | 0.2977 | -0.0174 | 0.0270 | 0.5318 | 5.0727  | 0.9555 | -22649.1029 |
| MF0091 | LargeArteryStroke   | Inverse variance weighted | 14 | 1.0621 | 0.8872 | 1.2715 | 0.5117 | -0.0174 | 0.0270 | 0.5318 | 5.0727  | 0.9555 | -22649.1029 |
| MF0091 | LargeArteryStroke   | Simple mode               | 14 | 1.1397 | 0.8046 | 1.6144 | 0.4748 | -0.0174 | 0.0270 | 0.5318 | 5.0727  | 0.9555 | -22649.1029 |
| MF0091 | LargeArteryStroke   | Weighted mode             | 14 | 1.1397 | 0.8945 | 1.4520 | 0.3093 | -0.0174 | 0.0270 | 0.5318 | 5.0727  | 0.9555 | -22649.1029 |
| MF0091 | SmallVesselStroke   | MR Egger                  | 15 | 1.0078 | 0.8534 | 1.1902 | 0.9283 | 0.0057  | 0.0151 | 0.7102 | 9.5538  | 0.7300 | -6238.0611  |
| MF0091 | SmallVesselStroke   | Weighted median           | 15 | 1.0363 | 0.9072 | 1.1838 | 0.5995 | 0.0057  | 0.0151 | 0.7102 | 9.5538  | 0.7300 | -6238.0611  |
| MF0091 | SmallVesselStroke   | Inverse variance weighted | 15 | 1.0343 | 0.9369 | 1.1418 | 0.5043 | 0.0057  | 0.0151 | 0.7102 | 9.5538  | 0.7300 | -6238.0611  |
| MF0091 | SmallVesselStroke   | Simple mode               | 15 | 1.0550 | 0.8497 | 1.3098 | 0.6353 | 0.0057  | 0.0151 | 0.7102 | 9.5538  | 0.7300 | -6238.0611  |
| MF0091 | SmallVesselStroke   | Weighted mode             | 15 | 1.0101 | 0.8641 | 1.1806 | 0.9018 | 0.0057  | 0.0151 | 0.7102 | 9.5538  | 0.7300 | -6238.0611  |
| MF0091 | Stroke              | MR Egger                  | 17 | 1.0170 | 0.9097 | 1.1369 | 0.7716 | 0.0011  | 0.0086 | 0.9047 | 16.2439 | 0.3660 | 23020.9835  |
| MF0091 | Stroke              | Weighted median           | 17 | 1.0365 | 0.9528 | 1.1275 | 0.4043 | 0.0011  | 0.0086 | 0.9047 | 16.2439 | 0.3660 | 23020.9835  |
| MF0091 | Stroke              | Inverse variance weighted | 17 | 1.0230 | 0.9677 | 1.0815 | 0.4227 | 0.0011  | 0.0086 | 0.9047 | 16.2439 | 0.3660 | 23020.9835  |
| MF0091 | Stroke              | Simple mode               | 17 | 1.0248 | 0.8838 | 1.1883 | 0.7497 | 0.0011  | 0.0086 | 0.9047 | 16.2439 | 0.3660 | 23020.9835  |
| MF0091 | Stroke              | Weighted mode             | 17 | 1.0506 | 0.9386 | 1.1759 | 0.4038 | 0.0011  | 0.0086 | 0.9047 | 16.2439 | 0.3660 | 23020.9835  |
| MF0092 | CardioEmbolicStroke | MR Egger                  | 15 | 0.9645 | 0.2302 | 4.0409 | 0.9613 | 0.0241  | 0.0747 | 0.7526 | 9.5071  | 0.7337 | 8.3426      |
| MF0092 | CardioEmbolicStroke | Weighted median           | 15 | 1.2563 | 0.8216 | 1.9209 | 0.2923 | 0.0241  | 0.0747 | 0.7526 | 9.5071  | 0.7337 | 8.3426      |
| MF0092 | CardioEmbolicStroke | Inverse variance weighted | 15 | 1.2138 | 0.8948 | 1.6466 | 0.2129 | 0.0241  | 0.0747 | 0.7526 | 9.5071  | 0.7337 | 8.3426      |
| MF0092 | CardioEmbolicStroke | Simple mode               | 15 | 1.4934 | 0.7114 | 3.1353 | 0.3071 | 0.0241  | 0.0747 | 0.7526 | 9.5071  | 0.7337 | 8.3426      |
| MF0092 | CardioEmbolicStroke | Weighted mode             | 15 | 1.4013 | 0.6866 | 2.8598 | 0.3696 | 0.0241  | 0.0747 | 0.7526 | 9.5071  | 0.7337 | 8.3426      |
| MF0092 | IschemicStroke      | MR Egger                  | 26 | 0.9992 | 0.8957 | 1.1146 | 0.9885 | 0.0003  | 0.0074 | 0.9662 | 17.2882 | 0.8361 | -3323.6484  |
| MF0092 | IschemicStroke      | Weighted median           | 26 | 1.0442 | 0.9723 | 1.1214 | 0.2346 | 0.0003  | 0.0074 | 0.9662 | 17.2882 | 0.8361 | -3323.6484  |
| MF0092 | IschemicStroke      | Inverse variance weighted | 26 | 1.0013 | 0.9515 | 1.0537 | 0.9601 | 0.0003  | 0.0074 | 0.9662 | 17.2882 | 0.8361 | -3323.6484  |
| MF0092 | IschemicStroke      | Simple mode               | 26 | 1.0649 | 0.9488 | 1.1953 | 0.2958 | 0.0003  | 0.0074 | 0.9662 | 17.2882 | 0.8361 | -3323.6484  |
| MF0092 | IschemicStroke      | Weighted mode             | 26 | 1.0617 | 0.9483 | 1.1887 | 0.3085 | 0.0003  | 0.0074 | 0.9662 | 17.2882 | 0.8361 | -3323.6484  |
| MF0092 | LargeArteryStroke   | MR Egger                  | 20 | 0.6363 | 0.4133 | 0.9797 | 0.0549 | 0.0408  | 0.0272 | 0.1511 | 16.2616 | 0.6398 | 76.1901     |
| MF0092 | LargeArteryStroke   | Weighted median           | 20 | 0.8884 | 0.6863 | 1.1499 | 0.3686 | 0.0408  | 0.0272 | 0.1511 | 16.2616 | 0.6398 | 76.1901     |
| MF0092 | LargeArteryStroke   | Inverse variance weighted | 20 | 0.8583 | 0.7151 | 1.0301 | 0.1006 | 0.0408  | 0.0272 | 0.1511 | 16.2616 | 0.6398 | 76.1901     |
| MF0092 | LargeArteryStroke   | Simple mode               | 20 | 0.9409 | 0.5730 | 1.5448 | 0.8122 | 0.0408  | 0.0272 | 0.1511 | 16.2616 | 0.6398 | 76.1901     |
| MF0092 | LargeArteryStroke   | Weighted mode             | 20 | 0.9409 | 0.5870 | 1.5080 | 0.8028 | 0.0408  | 0.0272 | 0.1511 | 16.2616 | 0.6398 | 76.1901     |
| MF0092 | SmallVesselStroke   | MR Egger                  | 20 | 1.1151 | 0.8791 | 1.4145 | 0.3811 | -0.0190 | 0.0150 | 0.2219 | 18.9722 | 0.4586 | 217.2267    |
| MF0092 | SmallVesselStroke   | Weighted median           | 20 | 1.0360 | 0.8944 | 1.2001 | 0.6370 | -0.0190 | 0.0150 | 0.2219 | 18.9722 | 0.4586 | 217.2267    |
| MF0092 | SmallVesselStroke   | Inverse variance weighted | 20 | 0.9704 | 0.8772 | 1.0734 | 0.5589 | -0.0190 | 0.0150 | 0.2219 | 18.9722 | 0.4586 | 217.2267    |
| MF0092 | SmallVesselStroke   | Simple mode               | 20 | 1.0251 | 0.7658 | 1.3722 | 0.8693 | -0.0190 | 0.0150 | 0.2219 | 18.9722 | 0.4586 | 217.2267    |
| MF0092 | SmallVesselStroke   | Weighted mode             | 20 | 1.0399 | 0.8342 | 1.2964 | 0.7319 | -0.0190 | 0.0150 | 0.2219 | 18.9722 | 0.4586 | 217.2267    |
| MF0092 | Stroke              | MR Egger                  | 27 | 0.9828 | 0.8931 | 1.0815 | 0.7252 | 0.0013  | 0.0064 | 0.8426 | 20.5679 | 0.7164 | -2824.2579  |
| MF0092 | Stroke              | Weighted median           | 27 | 1.0250 | 0.9603 | 1.0941 | 0.4584 | 0.0013  | 0.0064 | 0.8426 | 20.5679 | 0.7164 | -2824.2579  |
| MF0092 | Stroke              | Inverse variance weighted | 27 | 0.9914 | 0.9486 | 1.0361 | 0.7000 | 0.0013  | 0.0064 | 0.8426 | 20.5679 | 0.7164 | -2824.2579  |
| MF0092 | Stroke              | Simple mode               | 27 | 1.0369 | 0.9270 | 1.1599 | 0.5313 | 0.0013  | 0.0064 | 0.8426 | 20.5679 | 0.7164 | -2824.2579  |
| MF0092 | Stroke              | Weighted mode             | 27 | 1.0438 | 0.9473 | 1.1502 | 0.3944 | 0.0013  | 0.0064 | 0.8426 | 20.5679 | 0.7164 | -2824.2579  |
| MF0093 | CardioEmbolicStroke | MR Egger                  | 7  | 1.1784 | 0.4851 | 2.8624 | 0.7318 | -0.0970 | 0.1664 | 0.5852 | 0.7563  | 0.9797 | -25767.2259 |
| MF0093 | CardioEmbolicStroke | Weighted median           | 7  | 0.9187 | 0.7669 | 1.1006 | 0.3576 | -0.0970 | 0.1664 | 0.5852 | 0.7563  | 0.9797 | -25767.2259 |
| MF0093 | CardioEmbolicStroke | Inverse variance weighted | 7  | 0.9081 | 0.7863 | 1.0489 | 0.1900 | -0.0970 | 0.1664 | 0.5852 | 0.7563  | 0.9797 | -25767.2259 |

|        |                     |                           |    |        |        |        |        |         |        |        |         |        |             |
|--------|---------------------|---------------------------|----|--------|--------|--------|--------|---------|--------|--------|---------|--------|-------------|
| MF0093 | CardioEmbolicStroke | Simple mode               | 7  | 0.9306 | 0.7271 | 1.1910 | 0.5886 | -0.0970 | 0.1664 | 0.5852 | 0.7563  | 0.9797 | -25767.2259 |
| MF0093 | CardioEmbolicStroke | Weighted mode             | 7  | 0.9299 | 0.7293 | 1.1856 | 0.5788 | -0.0970 | 0.1664 | 0.5852 | 0.7563  | 0.9797 | -25767.2259 |
| MF0093 | IschemicStroke      | MR Egger                  | 10 | 0.9738 | 0.9072 | 1.0452 | 0.4832 | 0.0021  | 0.0165 | 0.8997 | 10.3133 | 0.2437 | -179.5089   |
| MF0093 | IschemicStroke      | Weighted median           | 10 | 0.9815 | 0.9470 | 1.0172 | 0.3059 | 0.0021  | 0.0165 | 0.8997 | 10.3133 | 0.2437 | -179.5089   |
| MF0093 | IschemicStroke      | Inverse variance weighted | 10 | 0.9780 | 0.9516 | 1.0051 | 0.1109 | 0.0021  | 0.0165 | 0.8997 | 10.3133 | 0.2437 | -179.5089   |
| MF0093 | IschemicStroke      | Simple mode               | 10 | 0.9760 | 0.9257 | 1.0291 | 0.3920 | 0.0021  | 0.0165 | 0.8997 | 10.3133 | 0.2437 | -179.5089   |
| MF0093 | IschemicStroke      | Weighted mode             | 10 | 0.9796 | 0.9316 | 1.0300 | 0.4409 | 0.0021  | 0.0165 | 0.8997 | 10.3133 | 0.2437 | -179.5089   |
| MF0093 | LargeArteryStroke   | MR Egger                  | 9  | 0.9274 | 0.7392 | 1.1635 | 0.5357 | -0.0014 | 0.0515 | 0.9797 | 7.6305  | 0.3663 | -59.0268    |
| MF0093 | LargeArteryStroke   | Weighted median           | 9  | 0.9302 | 0.8330 | 1.0388 | 0.1993 | -0.0014 | 0.0515 | 0.9797 | 7.6305  | 0.3663 | -59.0268    |
| MF0093 | LargeArteryStroke   | Inverse variance weighted | 9  | 0.9248 | 0.8493 | 1.0070 | 0.0719 | -0.0014 | 0.0515 | 0.9797 | 7.6305  | 0.3663 | -59.0268    |
| MF0093 | LargeArteryStroke   | Simple mode               | 9  | 0.9097 | 0.7699 | 1.0749 | 0.2987 | -0.0014 | 0.0515 | 0.9797 | 7.6305  | 0.3663 | -59.0268    |
| MF0093 | LargeArteryStroke   | Weighted mode             | 9  | 0.9318 | 0.8099 | 1.0721 | 0.3527 | -0.0014 | 0.0515 | 0.9797 | 7.6305  | 0.3663 | -59.0268    |
| MF0093 | SmallVesselStroke   | MR Egger                  | 9  | 0.9241 | 0.8180 | 1.0440 | 0.2455 | 0.0333  | 0.0276 | 0.2664 | 7.4381  | 0.4902 | -183.7511   |
| MF0093 | SmallVesselStroke   | Weighted median           | 9  | 0.9933 | 0.9295 | 1.0615 | 0.8432 | 0.0333  | 0.0276 | 0.2664 | 7.4381  | 0.4902 | -183.7511   |
| MF0093 | SmallVesselStroke   | Inverse variance weighted | 9  | 0.9904 | 0.9445 | 1.0385 | 0.6901 | 0.0333  | 0.0276 | 0.2664 | 7.4381  | 0.4902 | -183.7511   |
| MF0093 | SmallVesselStroke   | Simple mode               | 9  | 1.0312 | 0.9331 | 1.1396 | 0.5638 | 0.0333  | 0.0276 | 0.2664 | 7.4381  | 0.4902 | -183.7511   |
| MF0093 | SmallVesselStroke   | Weighted mode             | 9  | 0.9686 | 0.8818 | 1.0639 | 0.5240 | 0.0333  | 0.0276 | 0.2664 | 7.4381  | 0.4902 | -183.7511   |
| MF0093 | Stroke              | MR Egger                  | 11 | 0.9875 | 0.9264 | 1.0526 | 0.7084 | -0.0025 | 0.0143 | 0.8666 | 11.9866 | 0.2141 | -256.0287   |
| MF0093 | Stroke              | Weighted median           | 11 | 0.9915 | 0.9604 | 1.0236 | 0.5978 | -0.0025 | 0.0143 | 0.8666 | 11.9866 | 0.2141 | -256.0287   |
| MF0093 | Stroke              | Inverse variance weighted | 11 | 0.9824 | 0.9592 | 1.0061 | 0.1448 | -0.0025 | 0.0143 | 0.8666 | 11.9866 | 0.2141 | -256.0287   |
| MF0093 | Stroke              | Simple mode               | 11 | 0.9930 | 0.9492 | 1.0389 | 0.7683 | -0.0025 | 0.0143 | 0.8666 | 11.9866 | 0.2141 | -256.0287   |
| MF0093 | Stroke              | Weighted mode             | 11 | 0.9912 | 0.9496 | 1.0348 | 0.6966 | -0.0025 | 0.0143 | 0.8666 | 11.9866 | 0.2141 | -256.0287   |
| MF0094 | CardioEmbolicStroke | MR Egger                  | 8  | 0.6252 | 0.1548 | 2.5240 | 0.5339 | 0.1021  | 0.1037 | 0.3628 | 4.4993  | 0.7208 | 14.7269     |
| MF0094 | CardioEmbolicStroke | Weighted median           | 8  | 1.2874 | 0.8385 | 1.9768 | 0.2482 | 0.1021  | 0.1037 | 0.3628 | 4.4993  | 0.7208 | 14.7269     |
| MF0094 | CardioEmbolicStroke | Inverse variance weighted | 8  | 1.2364 | 0.8940 | 1.7099 | 0.1996 | 0.1021  | 0.1037 | 0.3628 | 4.4993  | 0.7208 | 14.7269     |
| MF0094 | CardioEmbolicStroke | Simple mode               | 8  | 1.3373 | 0.6700 | 2.6691 | 0.4369 | 0.1021  | 0.1037 | 0.3628 | 4.4993  | 0.7208 | 14.7269     |
| MF0094 | CardioEmbolicStroke | Weighted mode             | 8  | 1.3790 | 0.6749 | 2.8177 | 0.4073 | 0.1021  | 0.1037 | 0.3628 | 4.4993  | 0.7208 | 14.7269     |
| MF0094 | IschemicStroke      | MR Egger                  | 15 | 0.9644 | 0.8808 | 1.0558 | 0.4466 | 0.0122  | 0.0095 | 0.2223 | 17.7276 | 0.2195 | -295.4842   |
| MF0094 | IschemicStroke      | Weighted median           | 15 | 0.9710 | 0.9060 | 1.0408 | 0.4062 | 0.0122  | 0.0095 | 0.2223 | 17.7276 | 0.2195 | -295.4842   |
| MF0094 | IschemicStroke      | Inverse variance weighted | 15 | 1.0123 | 0.9599 | 1.0676 | 0.6515 | 0.0122  | 0.0095 | 0.2223 | 17.7276 | 0.2195 | -295.4842   |
| MF0094 | IschemicStroke      | Simple mode               | 15 | 0.9745 | 0.8632 | 1.1003 | 0.6835 | 0.0122  | 0.0095 | 0.2223 | 17.7276 | 0.2195 | -295.4842   |
| MF0094 | IschemicStroke      | Weighted mode             | 15 | 0.9597 | 0.8908 | 1.0340 | 0.2978 | 0.0122  | 0.0095 | 0.2223 | 17.7276 | 0.2195 | -295.4842   |
| MF0094 | LargeArteryStroke   | MR Egger                  | 10 | 0.9339 | 0.5250 | 1.6615 | 0.8220 | 0.0065  | 0.0485 | 0.8975 | 8.3524  | 0.3998 | 84.2890     |
| MF0094 | LargeArteryStroke   | Weighted median           | 10 | 0.9385 | 0.7084 | 1.2433 | 0.6580 | 0.0065  | 0.0485 | 0.8975 | 8.3524  | 0.3998 | 84.2890     |
| MF0094 | LargeArteryStroke   | Inverse variance weighted | 10 | 0.9685 | 0.7873 | 1.1915 | 0.7621 | 0.0065  | 0.0485 | 0.8975 | 8.3524  | 0.3998 | 84.2890     |
| MF0094 | LargeArteryStroke   | Simple mode               | 10 | 0.8173 | 0.5139 | 1.2997 | 0.4160 | 0.0065  | 0.0485 | 0.8975 | 8.3524  | 0.3998 | 84.2890     |
| MF0094 | LargeArteryStroke   | Weighted mode             | 10 | 0.8921 | 0.5970 | 1.3331 | 0.5911 | 0.0065  | 0.0485 | 0.8975 | 8.3524  | 0.3998 | 84.2890     |
| MF0094 | SmallVesselStroke   | MR Egger                  | 11 | 0.9217 | 0.7063 | 1.2029 | 0.5632 | 0.0310  | 0.0236 | 0.2215 | 4.1332  | 0.9411 | 833.9379    |
| MF0094 | SmallVesselStroke   | Weighted median           | 11 | 1.0936 | 0.9520 | 1.2562 | 0.2062 | 0.0310  | 0.0236 | 0.2215 | 4.1332  | 0.9411 | 833.9379    |
| MF0094 | SmallVesselStroke   | Inverse variance weighted | 11 | 1.0849 | 0.9735 | 1.2090 | 0.1404 | 0.0310  | 0.0236 | 0.2215 | 4.1332  | 0.9411 | 833.9379    |
| MF0094 | SmallVesselStroke   | Simple mode               | 11 | 1.1592 | 0.9198 | 1.4609 | 0.2391 | 0.0310  | 0.0236 | 0.2215 | 4.1332  | 0.9411 | 833.9379    |
| MF0094 | SmallVesselStroke   | Weighted mode             | 11 | 1.1335 | 0.9209 | 1.3952 | 0.2643 | 0.0310  | 0.0236 | 0.2215 | 4.1332  | 0.9411 | 833.9379    |
| MF0094 | Stroke              | MR Egger                  | 14 | 0.9315 | 0.8133 | 1.0669 | 0.3255 | 0.0111  | 0.0113 | 0.3433 | 15.7037 | 0.2655 | 3411.9018   |
| MF0094 | Stroke              | Weighted median           | 14 | 0.9829 | 0.9163 | 1.0544 | 0.6303 | 0.0111  | 0.0113 | 0.3433 | 15.7037 | 0.2655 | 3411.9018   |
| MF0094 | Stroke              | Inverse variance weighted | 14 | 0.9915 | 0.9385 | 1.0475 | 0.7607 | 0.0111  | 0.0113 | 0.3433 | 15.7037 | 0.2655 | 3411.9018   |
| MF0094 | Stroke              | Simple mode               | 14 | 0.9681 | 0.8626 | 1.0864 | 0.5907 | 0.0111  | 0.0113 | 0.3433 | 15.7037 | 0.2655 | 3411.9018   |
| MF0094 | Stroke              | Weighted mode             | 14 | 0.9642 | 0.8502 | 1.0935 | 0.5795 | 0.0111  | 0.0113 | 0.3433 | 15.7037 | 0.2655 | 3411.9018   |
| MF0095 | CardioEmbolicStroke | MR Egger                  | 11 | 1.0156 | 0.7686 | 1.3420 | 0.9156 | -0.0081 | 0.0430 | 0.8540 | 15.4726 | 0.0787 | -60.6154    |
| MF0095 | CardioEmbolicStroke | Weighted median           | 11 | 1.0515 | 0.8771 | 1.2605 | 0.5875 | -0.0081 | 0.0430 | 0.8540 | 15.4726 | 0.0787 | -60.6154    |
| MF0095 | CardioEmbolicStroke | Inverse variance weighted | 11 | 0.9955 | 0.8336 | 1.1889 | 0.9604 | -0.0081 | 0.0430 | 0.8540 | 15.4726 | 0.0787 | -60.6154    |
| MF0095 | CardioEmbolicStroke | Simple mode               | 11 | 1.1807 | 0.8200 | 1.7001 | 0.3929 | -0.0081 | 0.0430 | 0.8540 | 15.4726 | 0.0787 | -60.6154    |
| MF0095 | CardioEmbolicStroke | Weighted mode             | 11 | 1.0627 | 0.8847 | 1.2764 | 0.5304 | -0.0081 | 0.0430 | 0.8540 | 15.4726 | 0.0787 | -60.6154    |
| MF0095 | IschemicStroke      | MR Egger                  | 19 | 1.0153 | 0.9745 | 1.0578 | 0.4789 | -0.0043 | 0.0073 | 0.5643 | 4.0003  | 0.9995 | -124.6161   |

|        |                     |                           |    |        |        |         |        |         |        |        |         |        |           |
|--------|---------------------|---------------------------|----|--------|--------|---------|--------|---------|--------|--------|---------|--------|-----------|
| MF0095 | IschemicStroke      | Weighted median           | 19 | 1.0081 | 0.9704 | 1.0473  | 0.6785 | -0.0043 | 0.0073 | 0.5643 | 4.0003  | 0.9995 | -124.6161 |
| MF0095 | IschemicStroke      | Inverse variance weighted | 19 | 1.0059 | 0.9792 | 1.0333  | 0.6692 | -0.0043 | 0.0073 | 0.5643 | 4.0003  | 0.9995 | -124.6161 |
| MF0095 | IschemicStroke      | Simple mode               | 19 | 1.0132 | 0.9557 | 1.0742  | 0.6643 | -0.0043 | 0.0073 | 0.5643 | 4.0003  | 0.9995 | -124.6161 |
| MF0095 | IschemicStroke      | Weighted mode             | 19 | 1.0098 | 0.9718 | 1.0494  | 0.6236 | -0.0043 | 0.0073 | 0.5643 | 4.0003  | 0.9995 | -124.6161 |
| MF0095 | LargeArteryStroke   | MR Egger                  | 16 | 1.0137 | 0.8777 | 1.1709  | 0.8556 | 0.0196  | 0.0242 | 0.4317 | 4.8678  | 0.9932 | -36.4805  |
| MF0095 | LargeArteryStroke   | Weighted median           | 16 | 1.0266 | 0.9113 | 1.1564  | 0.6660 | 0.0196  | 0.0242 | 0.4317 | 4.8678  | 0.9932 | -36.4805  |
| MF0095 | LargeArteryStroke   | Inverse variance weighted | 16 | 1.0605 | 0.9652 | 1.1652  | 0.2218 | 0.0196  | 0.0242 | 0.4317 | 4.8678  | 0.9932 | -36.4805  |
| MF0095 | LargeArteryStroke   | Simple mode               | 16 | 1.1621 | 0.9376 | 1.4403  | 0.1902 | 0.0196  | 0.0242 | 0.4317 | 4.8678  | 0.9932 | -36.4805  |
| MF0095 | LargeArteryStroke   | Weighted mode             | 16 | 1.0218 | 0.9002 | 1.1597  | 0.7437 | 0.0196  | 0.0242 | 0.4317 | 4.8678  | 0.9932 | -36.4805  |
| MF0095 | SmallVesselStroke   | MR Egger                  | 16 | 0.9912 | 0.9154 | 1.0733  | 0.8303 | 0.0110  | 0.0134 | 0.4241 | 9.1578  | 0.8208 | -75.3622  |
| MF0095 | SmallVesselStroke   | Weighted median           | 16 | 1.0018 | 0.9305 | 1.0785  | 0.9620 | 0.0110  | 0.0134 | 0.4241 | 9.1578  | 0.8208 | -75.3622  |
| MF0095 | SmallVesselStroke   | Inverse variance weighted | 16 | 1.0165 | 0.9649 | 1.0709  | 0.5376 | 0.0110  | 0.0134 | 0.4241 | 9.1578  | 0.8208 | -75.3622  |
| MF0095 | SmallVesselStroke   | Simple mode               | 16 | 1.0842 | 0.9464 | 1.2421  | 0.2619 | 0.0110  | 0.0134 | 0.4241 | 9.1578  | 0.8208 | -75.3622  |
| MF0095 | SmallVesselStroke   | Weighted mode             | 16 | 0.9879 | 0.9222 | 1.0582  | 0.7331 | 0.0110  | 0.0134 | 0.4241 | 9.1578  | 0.8208 | -75.3622  |
| MF0095 | Stroke              | MR Egger                  | 18 | 1.0419 | 0.9666 | 1.1230  | 0.2998 | -0.0103 | 0.0093 | 0.2867 | 7.7936  | 0.9708 | -299.1438 |
| MF0095 | Stroke              | Weighted median           | 18 | 1.0147 | 0.9696 | 1.0617  | 0.5298 | -0.0103 | 0.0093 | 0.2867 | 7.7936  | 0.9708 | -299.1438 |
| MF0095 | Stroke              | Inverse variance weighted | 18 | 1.0035 | 0.9698 | 1.0383  | 0.8426 | -0.0103 | 0.0093 | 0.2867 | 7.7936  | 0.9708 | -299.1438 |
| MF0095 | Stroke              | Simple mode               | 18 | 1.0362 | 0.9542 | 1.1253  | 0.4098 | -0.0103 | 0.0093 | 0.2867 | 7.7936  | 0.9708 | -299.1438 |
| MF0095 | Stroke              | Weighted mode             | 18 | 1.0398 | 0.9649 | 1.1206  | 0.3208 | -0.0103 | 0.0093 | 0.2867 | 7.7936  | 0.9708 | -299.1438 |
| MF0096 | CardioEmbolicStroke | MR Egger                  | 10 | 2.5940 | 0.0801 | 84.0133 | 0.6057 | -0.0580 | 0.0901 | 0.5379 | 9.9801  | 0.2664 | 4.0140    |
| MF0096 | CardioEmbolicStroke | Weighted median           | 10 | 0.4431 | 0.1383 | 1.4193  | 0.1705 | -0.0580 | 0.0901 | 0.5379 | 9.9801  | 0.2664 | 4.0140    |
| MF0096 | CardioEmbolicStroke | Inverse variance weighted | 10 | 0.8653 | 0.3437 | 2.1789  | 0.7588 | -0.0580 | 0.0901 | 0.5379 | 9.9801  | 0.2664 | 4.0140    |
| MF0096 | CardioEmbolicStroke | Simple mode               | 10 | 0.3943 | 0.0679 | 2.2885  | 0.3267 | -0.0580 | 0.0901 | 0.5379 | 9.9801  | 0.2664 | 4.0140    |
| MF0096 | CardioEmbolicStroke | Weighted mode             | 10 | 0.4103 | 0.1018 | 1.6531  | 0.2418 | -0.0580 | 0.0901 | 0.5379 | 9.9801  | 0.2664 | 4.0140    |
| MF0096 | IschemicStroke      | MR Egger                  | 22 | 0.9096 | 0.6978 | 1.1857  | 0.4916 | 0.0049  | 0.0097 | 0.6178 | 22.5970 | 0.3090 | 38.6295   |
| MF0096 | IschemicStroke      | Weighted median           | 22 | 0.9228 | 0.7702 | 1.1057  | 0.3838 | 0.0049  | 0.0097 | 0.6178 | 22.5970 | 0.3090 | 38.6295   |
| MF0096 | IschemicStroke      | Inverse variance weighted | 22 | 0.9646 | 0.8435 | 1.1031  | 0.5988 | 0.0049  | 0.0097 | 0.6178 | 22.5970 | 0.3090 | 38.6295   |
| MF0096 | IschemicStroke      | Simple mode               | 22 | 0.9442 | 0.6909 | 1.2905  | 0.7225 | 0.0049  | 0.0097 | 0.6178 | 22.5970 | 0.3090 | 38.6295   |
| MF0096 | IschemicStroke      | Weighted mode             | 22 | 0.9143 | 0.7165 | 1.1667  | 0.4793 | 0.0049  | 0.0097 | 0.6178 | 22.5970 | 0.3090 | 38.6295   |
| MF0096 | LargeArteryStroke   | MR Egger                  | 15 | 1.0667 | 0.2796 | 4.0693  | 0.9262 | -0.0022 | 0.0402 | 0.9564 | 9.7822  | 0.7116 | 2.5774    |
| MF0096 | LargeArteryStroke   | Weighted median           | 15 | 1.1179 | 0.5292 | 2.3614  | 0.7702 | -0.0022 | 0.0402 | 0.9564 | 9.7822  | 0.7116 | 2.5774    |
| MF0096 | LargeArteryStroke   | Inverse variance weighted | 15 | 1.0300 | 0.6087 | 1.7428  | 0.9124 | -0.0022 | 0.0402 | 0.9564 | 9.7822  | 0.7116 | 2.5774    |
| MF0096 | LargeArteryStroke   | Simple mode               | 15 | 1.1306 | 0.3442 | 3.7138  | 0.8426 | -0.0022 | 0.0402 | 0.9564 | 9.7822  | 0.7116 | 2.5774    |
| MF0096 | LargeArteryStroke   | Weighted mode             | 15 | 1.1181 | 0.3947 | 3.1675  | 0.8366 | -0.0022 | 0.0402 | 0.9564 | 9.7822  | 0.7116 | 2.5774    |
| MF0096 | SmallVesselStroke   | MR Egger                  | 19 | 0.9064 | 0.5143 | 1.5975  | 0.7382 | 0.0060  | 0.0189 | 0.7533 | 17.6467 | 0.4115 | 5.6907    |
| MF0096 | SmallVesselStroke   | Weighted median           | 19 | 0.9197 | 0.6293 | 1.3441  | 0.6654 | 0.0060  | 0.0189 | 0.7533 | 17.6467 | 0.4115 | 5.6907    |
| MF0096 | SmallVesselStroke   | Inverse variance weighted | 19 | 0.9837 | 0.7604 | 1.2727  | 0.9007 | 0.0060  | 0.0189 | 0.7533 | 17.6467 | 0.4115 | 5.6907    |
| MF0096 | SmallVesselStroke   | Simple mode               | 19 | 1.1622 | 0.5985 | 2.2570  | 0.6624 | 0.0060  | 0.0189 | 0.7533 | 17.6467 | 0.4115 | 5.6907    |
| MF0096 | SmallVesselStroke   | Weighted mode             | 19 | 1.0214 | 0.5690 | 1.8335  | 0.9443 | 0.0060  | 0.0189 | 0.7533 | 17.6467 | 0.4115 | 5.6907    |
| MF0096 | Stroke              | MR Egger                  | 21 | 0.9400 | 0.7114 | 1.2420  | 0.6682 | 0.0066  | 0.0096 | 0.4993 | 25.5843 | 0.1422 | 40.8659   |
| MF0096 | Stroke              | Weighted median           | 21 | 1.0100 | 0.8453 | 1.2068  | 0.9125 | 0.0066  | 0.0096 | 0.4993 | 25.5843 | 0.1422 | 40.8659   |
| MF0096 | Stroke              | Inverse variance weighted | 21 | 1.0240 | 0.8959 | 1.1704  | 0.7284 | 0.0066  | 0.0096 | 0.4993 | 25.5843 | 0.1422 | 40.8659   |
| MF0096 | Stroke              | Simple mode               | 21 | 0.9553 | 0.6802 | 1.3415  | 0.7944 | 0.0066  | 0.0096 | 0.4993 | 25.5843 | 0.1422 | 40.8659   |
| MF0096 | Stroke              | Weighted mode             | 21 | 0.9757 | 0.7172 | 1.3275  | 0.8772 | 0.0066  | 0.0096 | 0.4993 | 25.5843 | 0.1422 | 40.8659   |
| MF0097 | CardioEmbolicStroke | MR Egger                  | 9  | 1.3528 | 0.5414 | 3.3806  | 0.5384 | -0.0611 | 0.0646 | 0.3760 | 6.8598  | 0.4436 | 35.1550   |
| MF0097 | CardioEmbolicStroke | Weighted median           | 9  | 0.9713 | 0.6512 | 1.4487  | 0.8864 | -0.0611 | 0.0646 | 0.3760 | 6.8598  | 0.4436 | 35.1550   |
| MF0097 | CardioEmbolicStroke | Inverse variance weighted | 9  | 0.8933 | 0.6531 | 1.2217  | 0.4799 | -0.0611 | 0.0646 | 0.3760 | 6.8598  | 0.4436 | 35.1550   |
| MF0097 | CardioEmbolicStroke | Simple mode               | 9  | 0.9434 | 0.5044 | 1.7645  | 0.8598 | -0.0611 | 0.0646 | 0.3760 | 6.8598  | 0.4436 | 35.1550   |
| MF0097 | CardioEmbolicStroke | Weighted mode             | 9  | 0.9492 | 0.5297 | 1.7010  | 0.8654 | -0.0611 | 0.0646 | 0.3760 | 6.8598  | 0.4436 | 35.1550   |
| MF0097 | IschemicStroke      | MR Egger                  | 9  | 0.9312 | 0.7540 | 1.1499  | 0.5289 | 0.0171  | 0.0150 | 0.2907 | 5.9396  | 0.6540 | 266.6245  |
| MF0097 | IschemicStroke      | Weighted median           | 9  | 1.0177 | 0.9239 | 1.1210  | 0.7222 | 0.0171  | 0.0150 | 0.2907 | 5.9396  | 0.6540 | 266.6245  |
| MF0097 | IschemicStroke      | Inverse variance weighted | 9  | 1.0452 | 0.9721 | 1.1238  | 0.2317 | 0.0171  | 0.0150 | 0.2907 | 5.9396  | 0.6540 | 266.6245  |
| MF0097 | IschemicStroke      | Simple mode               | 9  | 0.9954 | 0.8585 | 1.1542  | 0.9529 | 0.0171  | 0.0150 | 0.2907 | 5.9396  | 0.6540 | 266.6245  |

|        |                     |                           |    |        |        |         |        |         |        |        |         |        |          |
|--------|---------------------|---------------------------|----|--------|--------|---------|--------|---------|--------|--------|---------|--------|----------|
| MF0097 | IschemicStroke      | Weighted mode             | 9  | 1.0078 | 0.8712 | 1.1657  | 0.9196 | 0.0171  | 0.0150 | 0.2907 | 5.9396  | 0.6540 | 266.6245 |
| MF0097 | LargeArteryStroke   | MR Egger                  | 9  | 1.2700 | 0.5293 | 3.0471  | 0.6091 | -0.0360 | 0.0625 | 0.5821 | 11.9923 | 0.1008 | 17.2816  |
| MF0097 | LargeArteryStroke   | Weighted median           | 9  | 0.9216 | 0.6546 | 1.2973  | 0.6397 | -0.0360 | 0.0625 | 0.5821 | 11.9923 | 0.1008 | 17.2816  |
| MF0097 | LargeArteryStroke   | Inverse variance weighted | 9  | 0.9973 | 0.7462 | 1.3330  | 0.9856 | -0.0360 | 0.0625 | 0.5821 | 11.9923 | 0.1008 | 17.2816  |
| MF0097 | LargeArteryStroke   | Simple mode               | 9  | 0.8231 | 0.4349 | 1.5581  | 0.5665 | -0.0360 | 0.0625 | 0.5821 | 11.9923 | 0.1008 | 17.2816  |
| MF0097 | LargeArteryStroke   | Weighted mode             | 9  | 0.8349 | 0.4553 | 1.5310  | 0.5757 | -0.0360 | 0.0625 | 0.5821 | 11.9923 | 0.1008 | 17.2816  |
| MF0097 | SmallVesselStroke   | MR Egger                  | 9  | 0.8327 | 0.5431 | 1.2768  | 0.4289 | 0.0197  | 0.0303 | 0.5358 | 8.8262  | 0.2654 | 62.0880  |
| MF0097 | SmallVesselStroke   | Weighted median           | 9  | 0.9207 | 0.7671 | 1.1051  | 0.3751 | 0.0197  | 0.0303 | 0.5358 | 8.8262  | 0.2654 | 62.0880  |
| MF0097 | SmallVesselStroke   | Inverse variance weighted | 9  | 0.9515 | 0.8264 | 1.0957  | 0.4900 | 0.0197  | 0.0303 | 0.5358 | 8.8262  | 0.2654 | 62.0880  |
| MF0097 | SmallVesselStroke   | Simple mode               | 9  | 0.9476 | 0.7127 | 1.2600  | 0.7209 | 0.0197  | 0.0303 | 0.5358 | 8.8262  | 0.2654 | 62.0880  |
| MF0097 | SmallVesselStroke   | Weighted mode             | 9  | 0.9336 | 0.7204 | 1.2100  | 0.6178 | 0.0197  | 0.0303 | 0.5358 | 8.8262  | 0.2654 | 62.0880  |
| MF0097 | Stroke              | MR Egger                  | 9  | 0.9028 | 0.7522 | 1.0835  | 0.3084 | 0.0197  | 0.0129 | 0.1698 | 8.2196  | 0.4123 | 237.9594 |
| MF0097 | Stroke              | Weighted median           | 9  | 1.0254 | 0.9413 | 1.1171  | 0.5653 | 0.0197  | 0.0129 | 0.1698 | 8.2196  | 0.4123 | 237.9594 |
| MF0097 | Stroke              | Inverse variance weighted | 9  | 1.0322 | 0.9693 | 1.0993  | 0.3230 | 0.0197  | 0.0129 | 0.1698 | 8.2196  | 0.4123 | 237.9594 |
| MF0097 | Stroke              | Simple mode               | 9  | 1.0069 | 0.8706 | 1.1645  | 0.9286 | 0.0197  | 0.0129 | 0.1698 | 8.2196  | 0.4123 | 237.9594 |
| MF0097 | Stroke              | Weighted mode             | 9  | 1.0020 | 0.8724 | 1.1509  | 0.9779 | 0.0197  | 0.0129 | 0.1698 | 8.2196  | 0.4123 | 237.9594 |
| MF0098 | CardioEmbolicStroke | MR Egger                  | 3  | #####  | 0.0343 | #####   | 0.3926 | -0.4062 | 0.2945 | 0.3994 | 1.9634  | 0.3747 | 1.1649   |
| MF0098 | CardioEmbolicStroke | Weighted median           | 3  | 1.1099 | 0.1675 | 7.3548  | 0.9139 | -0.4062 | 0.2945 | 0.3994 | 1.9634  | 0.3747 | 1.1649   |
| MF0098 | CardioEmbolicStroke | Inverse variance weighted | 3  | 1.3013 | 0.2727 | 6.2090  | 0.7412 | -0.4062 | 0.2945 | 0.3994 | 1.9634  | 0.3747 | 1.1649   |
| MF0098 | CardioEmbolicStroke | Simple mode               | 3  | 0.8528 | 0.0553 | 13.1578 | 0.9196 | -0.4062 | 0.2945 | 0.3994 | 1.9634  | 0.3747 | 1.1649   |
| MF0098 | CardioEmbolicStroke | Weighted mode             | 3  | 0.5902 | 0.0338 | 10.2957 | 0.7523 | -0.4062 | 0.2945 | 0.3994 | 1.9634  | 0.3747 | 1.1649   |
| MF0098 | IschemicStroke      | MR Egger                  | 8  | 0.9990 | 0.6238 | 1.6000  | 0.9969 | 0.0122  | 0.0170 | 0.4998 | 7.1688  | 0.3055 | 9.6977   |
| MF0098 | IschemicStroke      | Weighted median           | 8  | 1.2508 | 0.9211 | 1.6986  | 0.1517 | 0.0122  | 0.0170 | 0.4998 | 7.1688  | 0.3055 | 9.6977   |
| MF0098 | IschemicStroke      | Inverse variance weighted | 8  | 1.1553 | 0.9044 | 1.4757  | 0.2478 | 0.0122  | 0.0170 | 0.4998 | 7.1688  | 0.3055 | 9.6977   |
| MF0098 | IschemicStroke      | Simple mode               | 8  | 1.2981 | 0.8538 | 1.9737  | 0.2617 | 0.0122  | 0.0170 | 0.4998 | 7.1688  | 0.3055 | 9.6977   |
| MF0098 | IschemicStroke      | Weighted mode             | 8  | 1.2981 | 0.8796 | 1.9157  | 0.2302 | 0.0122  | 0.0170 | 0.4998 | 7.1688  | 0.3055 | 9.6977   |
| MF0098 | LargeArteryStroke   | MR Egger                  | 4  | 0.3228 | 0.0478 | 2.1789  | 0.3656 | 0.0839  | 0.0584 | 0.2875 | 2.6687  | 0.4456 | 2.6774   |
| MF0098 | LargeArteryStroke   | Weighted median           | 4  | 0.7815 | 0.2405 | 2.5395  | 0.6818 | 0.0839  | 0.0584 | 0.2875 | 2.6687  | 0.4456 | 2.6774   |
| MF0098 | LargeArteryStroke   | Inverse variance weighted | 4  | 1.0974 | 0.4347 | 2.7702  | 0.8441 | 0.0839  | 0.0584 | 0.2875 | 2.6687  | 0.4456 | 2.6774   |
| MF0098 | LargeArteryStroke   | Simple mode               | 4  | 2.3838 | 0.4474 | 12.7016 | 0.3838 | 0.0839  | 0.0584 | 0.2875 | 2.6687  | 0.4456 | 2.6774   |
| MF0098 | LargeArteryStroke   | Weighted mode             | 4  | 0.6503 | 0.1652 | 2.5591  | 0.5817 | 0.0839  | 0.0584 | 0.2875 | 2.6687  | 0.4456 | 2.6774   |
| MF0098 | SmallVesselStroke   | MR Egger                  | 5  | 1.9905 | 0.8697 | 4.5557  | 0.2017 | -0.0182 | 0.0282 | 0.5645 | 0.5888  | 0.8990 | 3.3910   |
| MF0098 | SmallVesselStroke   | Weighted median           | 5  | 1.5311 | 0.8644 | 2.7118  | 0.1441 | -0.0182 | 0.0282 | 0.5645 | 0.5888  | 0.8990 | 3.3910   |
| MF0098 | SmallVesselStroke   | Inverse variance weighted | 5  | 1.5847 | 1.0059 | 2.4967  | 0.0471 | -0.0182 | 0.0282 | 0.5645 | 0.5888  | 0.8990 | 3.3910   |
| MF0098 | SmallVesselStroke   | Simple mode               | 5  | 1.3875 | 0.7107 | 2.7086  | 0.3916 | -0.0182 | 0.0282 | 0.5645 | 0.5888  | 0.8990 | 3.3910   |
| MF0098 | SmallVesselStroke   | Weighted mode             | 5  | 1.4451 | 0.6815 | 3.0640  | 0.3914 | -0.0182 | 0.0282 | 0.5645 | 0.5888  | 0.8990 | 3.3910   |
| MF0098 | Stroke              | MR Egger                  | 8  | 0.8981 | 0.6032 | 1.3372  | 0.6156 | 0.0213  | 0.0145 | 0.1924 | 9.5490  | 0.2156 | 15.6557  |
| MF0098 | Stroke              | Weighted median           | 8  | 1.1793 | 0.8911 | 1.5607  | 0.2486 | 0.0213  | 0.0145 | 0.1924 | 9.5490  | 0.2156 | 15.6557  |
| MF0098 | Stroke              | Inverse variance weighted | 8  | 1.1567 | 0.9215 | 1.4519  | 0.2094 | 0.0213  | 0.0145 | 0.1924 | 9.5490  | 0.2156 | 15.6557  |
| MF0098 | Stroke              | Simple mode               | 8  | 1.3077 | 0.8415 | 2.0323  | 0.2719 | 0.0213  | 0.0145 | 0.1924 | 9.5490  | 0.2156 | 15.6557  |
| MF0098 | Stroke              | Weighted mode             | 8  | 1.2410 | 0.8463 | 1.8199  | 0.3054 | 0.0213  | 0.0145 | 0.1924 | 9.5490  | 0.2156 | 15.6557  |
| MF0100 | CardioEmbolicStroke | MR Egger                  | 10 | 0.8042 | 0.6352 | 1.0183  | 0.1079 | 0.0910  | 0.0652 | 0.2001 | 5.2402  | 0.8129 | -32.1448 |
| MF0100 | CardioEmbolicStroke | Weighted median           | 10 | 0.9396 | 0.8457 | 1.0440  | 0.2463 | 0.0910  | 0.0652 | 0.2001 | 5.2402  | 0.8129 | -32.1448 |
| MF0100 | CardioEmbolicStroke | Inverse variance weighted | 10 | 0.9420 | 0.8696 | 1.0205  | 0.1434 | 0.0910  | 0.0652 | 0.2001 | 5.2402  | 0.8129 | -32.1448 |
| MF0100 | CardioEmbolicStroke | Simple mode               | 10 | 0.9458 | 0.8019 | 1.1157  | 0.5253 | 0.0910  | 0.0652 | 0.2001 | 5.2402  | 0.8129 | -32.1448 |
| MF0100 | CardioEmbolicStroke | Weighted mode             | 10 | 0.9214 | 0.7819 | 1.0857  | 0.3537 | 0.0910  | 0.0652 | 0.2001 | 5.2402  | 0.8129 | -32.1448 |
| MF0100 | IschemicStroke      | MR Egger                  | 16 | 0.9872 | 0.9650 | 1.0098  | 0.2827 | 0.0067  | 0.0088 | 0.4578 | 15.7831 | 0.3268 | -36.5556 |
| MF0100 | IschemicStroke      | Weighted median           | 16 | 0.9935 | 0.9758 | 1.0115  | 0.4763 | 0.0067  | 0.0088 | 0.4578 | 15.7831 | 0.3268 | -36.5556 |
| MF0100 | IschemicStroke      | Inverse variance weighted | 16 | 0.9942 | 0.9811 | 1.0075  | 0.3901 | 0.0067  | 0.0088 | 0.4578 | 15.7831 | 0.3268 | -36.5556 |
| MF0100 | IschemicStroke      | Simple mode               | 16 | 0.9756 | 0.9490 | 1.0030  | 0.1004 | 0.0067  | 0.0088 | 0.4578 | 15.7831 | 0.3268 | -36.5556 |
| MF0100 | IschemicStroke      | Weighted mode             | 16 | 0.9926 | 0.9716 | 1.0140  | 0.5040 | 0.0067  | 0.0088 | 0.4578 | 15.7831 | 0.3268 | -36.5556 |
| MF0100 | LargeArteryStroke   | MR Egger                  | 12 | 1.0121 | 0.8906 | 1.1502  | 0.8573 | -0.0018 | 0.0418 | 0.9674 | 16.9129 | 0.0763 | -15.9156 |
| MF0100 | LargeArteryStroke   | Weighted median           | 12 | 0.9782 | 0.9061 | 1.0561  | 0.5735 | -0.0018 | 0.0418 | 0.9674 | 16.9129 | 0.0763 | -15.9156 |

|        |                     |                           |    |        |        |        |        |         |        |        |         |        |            |
|--------|---------------------|---------------------------|----|--------|--------|--------|--------|---------|--------|--------|---------|--------|------------|
| MF0100 | LargeArteryStroke   | Inverse variance weighted | 12 | 1.0097 | 0.9497 | 1.0735 | 0.7569 | -0.0018 | 0.0418 | 0.9674 | 16.9129 | 0.0763 | -15.9156   |
| MF0100 | LargeArteryStroke   | Simple mode               | 12 | 0.9337 | 0.8187 | 1.0648 | 0.3281 | -0.0018 | 0.0418 | 0.9674 | 16.9129 | 0.0763 | -15.9156   |
| MF0100 | LargeArteryStroke   | Weighted mode             | 12 | 0.9566 | 0.8691 | 1.0530 | 0.3844 | -0.0018 | 0.0418 | 0.9674 | 16.9129 | 0.0763 | -15.9156   |
| MF0100 | SmallVesselStroke   | MR Egger                  | 13 | 0.9974 | 0.9517 | 1.0452 | 0.9138 | 0.0048  | 0.0164 | 0.7736 | 10.0036 | 0.5301 | -39.8825   |
| MF0100 | SmallVesselStroke   | Weighted median           | 13 | 0.9986 | 0.9638 | 1.0345 | 0.9363 | 0.0048  | 0.0164 | 0.7736 | 10.0036 | 0.5301 | -39.8825   |
| MF0100 | SmallVesselStroke   | Inverse variance weighted | 13 | 1.0033 | 0.9779 | 1.0293 | 0.8034 | 0.0048  | 0.0164 | 0.7736 | 10.0036 | 0.5301 | -39.8825   |
| MF0100 | SmallVesselStroke   | Simple mode               | 13 | 0.9977 | 0.9444 | 1.0540 | 0.9362 | 0.0048  | 0.0164 | 0.7736 | 10.0036 | 0.5301 | -39.8825   |
| MF0100 | SmallVesselStroke   | Weighted mode             | 13 | 0.9997 | 0.9594 | 1.0416 | 0.9879 | 0.0048  | 0.0164 | 0.7736 | 10.0036 | 0.5301 | -39.8825   |
| MF0100 | Stroke              | MR Egger                  | 15 | 0.9783 | 0.9541 | 1.0032 | 0.1116 | 0.0133  | 0.0084 | 0.1368 | 14.8850 | 0.3861 | -46.1547   |
| MF0100 | Stroke              | Weighted median           | 15 | 0.9928 | 0.9744 | 1.0116 | 0.4503 | 0.0133  | 0.0084 | 0.1368 | 14.8850 | 0.3861 | -46.1547   |
| MF0100 | Stroke              | Inverse variance weighted | 15 | 0.9957 | 0.9828 | 1.0088 | 0.5162 | 0.0133  | 0.0084 | 0.1368 | 14.8850 | 0.3861 | -46.1547   |
| MF0100 | Stroke              | Simple mode               | 15 | 0.9860 | 0.9565 | 1.0164 | 0.3782 | 0.0133  | 0.0084 | 0.1368 | 14.8850 | 0.3861 | -46.1547   |
| MF0100 | Stroke              | Weighted mode             | 15 | 0.9907 | 0.9628 | 1.0193 | 0.5298 | 0.0133  | 0.0084 | 0.1368 | 14.8850 | 0.3861 | -46.1547   |
| MF0101 | CardioEmbolicStroke | MR Egger                  | 8  | 1.0341 | 0.8590 | 1.2449 | 0.7355 | -0.0218 | 0.0329 | 0.5325 | 3.0730  | 0.7996 | -145.2346  |
| MF0101 | CardioEmbolicStroke | Weighted median           | 8  | 1.0046 | 0.8426 | 1.1978 | 0.9589 | -0.0218 | 0.0329 | 0.5325 | 3.0730  | 0.7996 | -145.2346  |
| MF0101 | CardioEmbolicStroke | Inverse variance weighted | 8  | 0.9903 | 0.8659 | 1.1325 | 0.8866 | -0.0218 | 0.0329 | 0.5325 | 3.0730  | 0.7996 | -145.2346  |
| MF0101 | CardioEmbolicStroke | Simple mode               | 8  | 0.8321 | 0.6439 | 1.0751 | 0.2025 | -0.0218 | 0.0329 | 0.5325 | 3.0730  | 0.7996 | -145.2346  |
| MF0101 | CardioEmbolicStroke | Weighted mode             | 8  | 1.0127 | 0.8560 | 1.1982 | 0.8870 | -0.0218 | 0.0329 | 0.5325 | 3.0730  | 0.7996 | -145.2346  |
| MF0101 | IschemicStroke      | MR Egger                  | 14 | 1.0202 | 0.9844 | 1.0572 | 0.2939 | -0.0002 | 0.0073 | 0.9805 | 7.3619  | 0.8328 | -128.8077  |
| MF0101 | IschemicStroke      | Weighted median           | 14 | 1.0068 | 0.9698 | 1.0452 | 0.7233 | -0.0002 | 0.0073 | 0.9805 | 7.3619  | 0.8328 | -128.8077  |
| MF0101 | IschemicStroke      | Inverse variance weighted | 14 | 1.0198 | 0.9947 | 1.0456 | 0.1223 | -0.0002 | 0.0073 | 0.9805 | 7.3619  | 0.8328 | -128.8077  |
| MF0101 | IschemicStroke      | Simple mode               | 14 | 1.0088 | 0.9503 | 1.0709 | 0.7786 | -0.0002 | 0.0073 | 0.9805 | 7.3619  | 0.8328 | -128.8077  |
| MF0101 | IschemicStroke      | Weighted mode             | 14 | 1.0023 | 0.9673 | 1.0384 | 0.9025 | -0.0002 | 0.0073 | 0.9805 | 7.3619  | 0.8328 | -128.8077  |
| MF0101 | LargeArteryStroke   | MR Egger                  | 11 | 0.9982 | 0.8860 | 1.1246 | 0.9766 | 0.0253  | 0.0238 | 0.3169 | 3.9507  | 0.9495 | -73.3868   |
| MF0101 | LargeArteryStroke   | Weighted median           | 11 | 1.0201 | 0.9177 | 1.1340 | 0.7120 | 0.0253  | 0.0238 | 0.3169 | 3.9507  | 0.9495 | -73.3868   |
| MF0101 | LargeArteryStroke   | Inverse variance weighted | 11 | 1.0448 | 0.9604 | 1.1366 | 0.3077 | 0.0253  | 0.0238 | 0.3169 | 3.9507  | 0.9495 | -73.3868   |
| MF0101 | LargeArteryStroke   | Simple mode               | 11 | 1.0508 | 0.8937 | 1.2355 | 0.5618 | 0.0253  | 0.0238 | 0.3169 | 3.9507  | 0.9495 | -73.3868   |
| MF0101 | LargeArteryStroke   | Weighted mode             | 11 | 1.0141 | 0.9183 | 1.1197 | 0.7883 | 0.0253  | 0.0238 | 0.3169 | 3.9507  | 0.9495 | -73.3868   |
| MF0101 | SmallVesselStroke   | MR Egger                  | 12 | 0.9856 | 0.9232 | 1.0523 | 0.6735 | 0.0104  | 0.0132 | 0.4502 | 8.0874  | 0.6203 | -72.5266   |
| MF0101 | SmallVesselStroke   | Weighted median           | 12 | 0.9950 | 0.9369 | 1.0568 | 0.8714 | 0.0104  | 0.0132 | 0.4502 | 8.0874  | 0.6203 | -72.5266   |
| MF0101 | SmallVesselStroke   | Inverse variance weighted | 12 | 1.0041 | 0.9589 | 1.0515 | 0.8608 | 0.0104  | 0.0132 | 0.4502 | 8.0874  | 0.6203 | -72.5266   |
| MF0101 | SmallVesselStroke   | Simple mode               | 12 | 1.0106 | 0.9290 | 1.0995 | 0.8100 | 0.0104  | 0.0132 | 0.4502 | 8.0874  | 0.6203 | -72.5266   |
| MF0101 | SmallVesselStroke   | Weighted mode             | 12 | 0.9951 | 0.9440 | 1.0490 | 0.8583 | 0.0104  | 0.0132 | 0.4502 | 8.0874  | 0.6203 | -72.5266   |
| MF0101 | Stroke              | MR Egger                  | 12 | 1.0176 | 0.9698 | 1.0677 | 0.4941 | -0.0005 | 0.0077 | 0.9452 | 12.8338 | 0.2331 | -246.4913  |
| MF0101 | Stroke              | Weighted median           | 12 | 1.0024 | 0.9601 | 1.0465 | 0.9142 | -0.0005 | 0.0077 | 0.9452 | 12.8338 | 0.2331 | -246.4913  |
| MF0101 | Stroke              | Inverse variance weighted | 12 | 1.0162 | 0.9860 | 1.0474 | 0.2958 | -0.0005 | 0.0077 | 0.9452 | 12.8338 | 0.2331 | -246.4913  |
| MF0101 | Stroke              | Simple mode               | 12 | 0.9752 | 0.9129 | 1.0417 | 0.4712 | -0.0005 | 0.0077 | 0.9452 | 12.8338 | 0.2331 | -246.4913  |
| MF0101 | Stroke              | Weighted mode             | 12 | 1.0004 | 0.9610 | 1.0415 | 0.9833 | -0.0005 | 0.0077 | 0.9452 | 12.8338 | 0.2331 | -246.4913  |
| MF0102 | CardioEmbolicStroke | MR Egger                  | 9  | 1.1996 | 0.6061 | 2.3741 | 0.6175 | -0.0650 | 0.0664 | 0.3601 | 4.6666  | 0.7925 | 110.4305   |
| MF0102 | CardioEmbolicStroke | Weighted median           | 9  | 0.9335 | 0.6812 | 1.2791 | 0.6683 | -0.0650 | 0.0664 | 0.3601 | 4.6666  | 0.7925 | 110.4305   |
| MF0102 | CardioEmbolicStroke | Inverse variance weighted | 9  | 0.8719 | 0.6848 | 1.1101 | 0.2660 | -0.0650 | 0.0664 | 0.3601 | 4.6666  | 0.7925 | 110.4305   |
| MF0102 | CardioEmbolicStroke | Simple mode               | 9  | 1.0161 | 0.6306 | 1.6373 | 0.9493 | -0.0650 | 0.0664 | 0.3601 | 4.6666  | 0.7925 | 110.4305   |
| MF0102 | CardioEmbolicStroke | Weighted mode             | 9  | 1.0161 | 0.6302 | 1.6384 | 0.9494 | -0.0650 | 0.0664 | 0.3601 | 4.6666  | 0.7925 | 110.4305   |
| MF0102 | IschemicStroke      | MR Egger                  | 23 | 1.0290 | 0.9563 | 1.1071 | 0.4534 | -0.0091 | 0.0107 | 0.4019 | 31.1735 | 0.0708 | -23.3683   |
| MF0102 | IschemicStroke      | Weighted median           | 23 | 0.9711 | 0.9256 | 1.0189 | 0.2315 | -0.0091 | 0.0107 | 0.4019 | 31.1735 | 0.0708 | -23.3683   |
| MF0102 | IschemicStroke      | Inverse variance weighted | 23 | 1.0021 | 0.9620 | 1.0438 | 0.9211 | -0.0091 | 0.0107 | 0.4019 | 31.1735 | 0.0708 | -23.3683   |
| MF0102 | IschemicStroke      | Simple mode               | 23 | 0.9477 | 0.8724 | 1.0295 | 0.2169 | -0.0091 | 0.0107 | 0.4019 | 31.1735 | 0.0708 | -23.3683   |
| MF0102 | IschemicStroke      | Weighted mode             | 23 | 0.9635 | 0.8983 | 1.0335 | 0.3101 | -0.0091 | 0.0107 | 0.4019 | 31.1735 | 0.0708 | -23.3683   |
| MF0102 | LargeArteryStroke   | MR Egger                  | 13 | 0.7180 | 0.4912 | 1.0496 | 0.1153 | 0.0668  | 0.0413 | 0.1345 | 7.9120  | 0.7920 | -3603.4869 |
| MF0102 | LargeArteryStroke   | Weighted median           | 13 | 0.9437 | 0.7688 | 1.1583 | 0.5794 | 0.0668  | 0.0413 | 0.1345 | 7.9120  | 0.7920 | -3603.4869 |
| MF0102 | LargeArteryStroke   | Inverse variance weighted | 13 | 0.9555 | 0.8183 | 1.1156 | 0.5644 | 0.0668  | 0.0413 | 0.1345 | 7.9120  | 0.7920 | -3603.4869 |
| MF0102 | LargeArteryStroke   | Simple mode               | 13 | 0.9745 | 0.7032 | 1.3503 | 0.8792 | 0.0668  | 0.0413 | 0.1345 | 7.9120  | 0.7920 | -3603.4869 |
| MF0102 | LargeArteryStroke   | Weighted mode             | 13 | 0.9498 | 0.7033 | 1.2826 | 0.7425 | 0.0668  | 0.0413 | 0.1345 | 7.9120  | 0.7920 | -3603.4869 |

|           |                     |                           |    |        |        |         |        |         |        |        |         |        |                |
|-----------|---------------------|---------------------------|----|--------|--------|---------|--------|---------|--------|--------|---------|--------|----------------|
| MF0102    | SmallVesselStroke   | MR Egger                  | 16 | 0.9296 | 0.7979 | 1.0830  | 0.3645 | 0.0147  | 0.0196 | 0.4658 | 17.5080 | 0.2301 | -59.9011       |
| MF0102    | SmallVesselStroke   | Weighted median           | 16 | 0.9214 | 0.8343 | 1.0177  | 0.1065 | 0.0147  | 0.0196 | 0.4658 | 17.5080 | 0.2301 | -59.9011       |
| MF0102    | SmallVesselStroke   | Inverse variance weighted | 16 | 0.9770 | 0.9031 | 1.0570  | 0.5628 | 0.0147  | 0.0196 | 0.4658 | 17.5080 | 0.2301 | -59.9011       |
| MF0102    | SmallVesselStroke   | Simple mode               | 16 | 0.8951 | 0.7680 | 1.0433  | 0.1767 | 0.0147  | 0.0196 | 0.4658 | 17.5080 | 0.2301 | -59.9011       |
| MF0102    | SmallVesselStroke   | Weighted mode             | 16 | 0.9100 | 0.7962 | 1.0401  | 0.1867 | 0.0147  | 0.0196 | 0.4658 | 17.5080 | 0.2301 | -59.9011       |
| MF0102    | Stroke              | MR Egger                  | 21 | 1.0496 | 0.9752 | 1.1297  | 0.2124 | -0.0107 | 0.0089 | 0.2473 | 18.0618 | 0.5833 | -79.8983       |
| MF0102    | Stroke              | Weighted median           | 21 | 1.0024 | 0.9563 | 1.0508  | 0.9203 | -0.0107 | 0.0089 | 0.2473 | 18.0618 | 0.5833 | -79.8983       |
| MF0102    | Stroke              | Inverse variance weighted | 21 | 1.0089 | 0.9746 | 1.0445  | 0.6141 | -0.0107 | 0.0089 | 0.2473 | 18.0618 | 0.5833 | -79.8983       |
| MF0102    | Stroke              | Simple mode               | 21 | 0.9960 | 0.9237 | 1.0739  | 0.9174 | -0.0107 | 0.0089 | 0.2473 | 18.0618 | 0.5833 | -79.8983       |
| MF0102    | Stroke              | Weighted mode             | 21 | 1.0004 | 0.9285 | 1.0777  | 0.9924 | -0.0107 | 0.0089 | 0.2473 | 18.0618 | 0.5833 | -79.8983       |
| MF0103    | CardioEmbolicStroke | MR Egger                  | 14 | 1.7316 | 0.2679 | 11.1924 | 0.5749 | -0.0564 | 0.0764 | 0.4750 | 17.7473 | 0.1236 | 2.2077         |
| MF0103    | CardioEmbolicStroke | Weighted median           | 14 | 1.0330 | 0.5945 | 1.7949  | 0.9084 | -0.0564 | 0.0764 | 0.4750 | 17.7473 | 0.1236 | 2.2077         |
| MF0103    | CardioEmbolicStroke | Inverse variance weighted | 14 | 0.8770 | 0.5560 | 1.3834  | 0.5725 | -0.0564 | 0.0764 | 0.4750 | 17.7473 | 0.1236 | 2.2077         |
| MF0103    | CardioEmbolicStroke | Simple mode               | 14 | 1.2130 | 0.4614 | 3.1885  | 0.7017 | -0.0564 | 0.0764 | 0.4750 | 17.7473 | 0.1236 | 2.2077         |
| MF0103    | CardioEmbolicStroke | Weighted mode             | 14 | 1.1195 | 0.4807 | 2.6074  | 0.7977 | -0.0564 | 0.0764 | 0.4750 | 17.7473 | 0.1236 | 2.2077         |
| MF0103    | IschemicStroke      | MR Egger                  | 40 | 1.0182 | 0.9412 | 1.1013  | 0.6561 | -0.0023 | 0.0052 | 0.6591 | 32.5182 | 0.7205 | -102.5897      |
| MF0103    | IschemicStroke      | Weighted median           | 40 | 1.0164 | 0.9494 | 1.0882  | 0.6405 | -0.0023 | 0.0052 | 0.6591 | 32.5182 | 0.7205 | -102.5897      |
| MF0103    | IschemicStroke      | Inverse variance weighted | 40 | 1.0039 | 0.9568 | 1.0533  | 0.8738 | -0.0023 | 0.0052 | 0.6591 | 32.5182 | 0.7205 | -102.5897      |
| MF0103    | IschemicStroke      | Simple mode               | 40 | 1.0112 | 0.8900 | 1.1489  | 0.8648 | -0.0023 | 0.0052 | 0.6591 | 32.5182 | 0.7205 | -102.5897      |
| MF0103    | IschemicStroke      | Weighted mode             | 40 | 0.9955 | 0.8865 | 1.1179  | 0.9400 | -0.0023 | 0.0052 | 0.6591 | 32.5182 | 0.7205 | -102.5897      |
| MF0103    | LargeArteryStroke   | MR Egger                  | 20 | 0.8839 | 0.5273 | 1.4817  | 0.6453 | 0.0263  | 0.0253 | 0.3129 | 16.5856 | 0.6179 | 33.4425        |
| MF0103    | LargeArteryStroke   | Weighted median           | 20 | 1.0644 | 0.7766 | 1.4588  | 0.6981 | 0.0263  | 0.0253 | 0.3129 | 16.5856 | 0.6179 | 33.4425        |
| MF0103    | LargeArteryStroke   | Inverse variance weighted | 20 | 1.1286 | 0.8943 | 1.4241  | 0.3082 | 0.0263  | 0.0253 | 0.3129 | 16.5856 | 0.6179 | 33.4425        |
| MF0103    | LargeArteryStroke   | Simple mode               | 20 | 1.0936 | 0.6014 | 1.9886  | 0.7724 | 0.0263  | 0.0253 | 0.3129 | 16.5856 | 0.6179 | 33.4425        |
| MF0103    | LargeArteryStroke   | Weighted mode             | 20 | 1.0669 | 0.5391 | 2.1115  | 0.8545 | 0.0263  | 0.0253 | 0.3129 | 16.5856 | 0.6179 | 33.4425        |
| MF0103    | SmallVesselStroke   | MR Egger                  | 24 | 1.0155 | 0.7810 | 1.3203  | 0.9098 | -0.0004 | 0.0150 | 0.9808 | 39.7072 | 0.0117 | -557.8901      |
| MF0103    | SmallVesselStroke   | Weighted median           | 24 | 0.9591 | 0.7948 | 1.1573  | 0.6630 | -0.0004 | 0.0150 | 0.9808 | 39.7072 | 0.0117 | -557.8901      |
| MF0103    | SmallVesselStroke   | Inverse variance weighted | 24 | 1.0127 | 0.8760 | 1.1709  | 0.8642 | -0.0004 | 0.0150 | 0.9808 | 39.7072 | 0.0117 | -557.8901      |
| MF0103    | SmallVesselStroke   | Simple mode               | 24 | 1.0039 | 0.7000 | 1.4398  | 0.9831 | -0.0004 | 0.0150 | 0.9808 | 39.7072 | 0.0117 | -557.8901      |
| MF0103    | SmallVesselStroke   | Weighted mode             | 24 | 0.9375 | 0.7076 | 1.2420  | 0.6570 | -0.0004 | 0.0150 | 0.9808 | 39.7072 | 0.0117 | -557.8901      |
| MF0103    | Stroke              | MR Egger                  | 34 | 1.0545 | 0.9692 | 1.1473  | 0.2268 | -0.0088 | 0.0049 | 0.0821 | 23.5920 | 0.8862 | -541.8513      |
| MF0103    | Stroke              | Weighted median           | 34 | 1.0044 | 0.9376 | 1.0759  | 0.9005 | -0.0088 | 0.0049 | 0.0821 | 23.5920 | 0.8862 | -541.8513      |
| MF0103    | Stroke              | Inverse variance weighted | 34 | 0.9895 | 0.9433 | 1.0379  | 0.6637 | -0.0088 | 0.0049 | 0.0821 | 23.5920 | 0.8862 | -541.8513      |
| MF0103    | Stroke              | Simple mode               | 34 | 1.0577 | 0.9372 | 1.1937  | 0.3699 | -0.0088 | 0.0049 | 0.0821 | 23.5920 | 0.8862 | -541.8513      |
| MF0103    | Stroke              | Weighted mode             | 34 | 1.0213 | 0.9280 | 1.1239  | 0.6697 | -0.0088 | 0.0049 | 0.0821 | 23.5920 | 0.8862 | -541.8513      |
| c_Bacilli | CardioEmbolicStroke | MR Egger                  | 12 | 0.7692 | 0.4000 | 1.4790  | 0.4497 | 0.0609  | 0.0773 | 0.4488 | 19.8827 | 0.0304 | -29723025.6408 |
| c_Bacilli | CardioEmbolicStroke | Weighted median           | 12 | 0.9232 | 0.7172 | 1.1883  | 0.5348 | 0.0609  | 0.0773 | 0.4488 | 19.8827 | 0.0304 | -29723025.6408 |
| c_Bacilli | CardioEmbolicStroke | Inverse variance weighted | 12 | 0.9818 | 0.7730 | 1.2470  | 0.8805 | 0.0609  | 0.0773 | 0.4488 | 19.8827 | 0.0304 | -29723025.6408 |
| c_Bacilli | CardioEmbolicStroke | Simple mode               | 12 | 0.9379 | 0.5978 | 1.4717  | 0.7856 | 0.0609  | 0.0773 | 0.4488 | 19.8827 | 0.0304 | -29723025.6408 |
| c_Bacilli | CardioEmbolicStroke | Weighted mode             | 12 | 0.9813 | 0.6369 | 1.5119  | 0.9333 | 0.0609  | 0.0773 | 0.4488 | 19.8827 | 0.0304 | -29723025.6408 |
| c_Bacilli | IschemicStroke      | MR Egger                  | 22 | 0.9979 | 0.9393 | 1.0601  | 0.9458 | 0.0023  | 0.0088 | 0.7930 | 20.4319 | 0.4312 | -60.8168       |
| c_Bacilli | IschemicStroke      | Weighted median           | 22 | 0.9849 | 0.9428 | 1.0289  | 0.4957 | 0.0023  | 0.0088 | 0.7930 | 20.4319 | 0.4312 | -60.8168       |
| c_Bacilli | IschemicStroke      | Inverse variance weighted | 22 | 1.0050 | 0.9750 | 1.0358  | 0.7479 | 0.0023  | 0.0088 | 0.7930 | 20.4319 | 0.4312 | -60.8168       |
| c_Bacilli | IschemicStroke      | Simple mode               | 22 | 0.9756 | 0.9096 | 1.0464  | 0.4967 | 0.0023  | 0.0088 | 0.7930 | 20.4319 | 0.4312 | -60.8168       |
| c_Bacilli | IschemicStroke      | Weighted mode             | 22 | 0.9764 | 0.9129 | 1.0443  | 0.4933 | 0.0023  | 0.0088 | 0.7930 | 20.4319 | 0.4312 | -60.8168       |
| c_Bacilli | LargeArteryStroke   | MR Egger                  | 14 | 0.6957 | 0.5076 | 0.9534  | 0.0434 | 0.0691  | 0.0389 | 0.1006 | 9.3516  | 0.7459 | -481.5191      |
| c_Bacilli | LargeArteryStroke   | Weighted median           | 14 | 0.8958 | 0.7679 | 1.0451  | 0.1618 | 0.0691  | 0.0389 | 0.1006 | 9.3516  | 0.7459 | -481.5191      |
| c_Bacilli | LargeArteryStroke   | Inverse variance weighted | 14 | 0.9059 | 0.8025 | 1.0226  | 0.1098 | 0.0691  | 0.0389 | 0.1006 | 9.3516  | 0.7459 | -481.5191      |
| c_Bacilli | LargeArteryStroke   | Simple mode               | 14 | 0.8839 | 0.6845 | 1.1414  | 0.3615 | 0.0691  | 0.0389 | 0.1006 | 9.3516  | 0.7459 | -481.5191      |
| c_Bacilli | LargeArteryStroke   | Weighted mode             | 14 | 0.8655 | 0.6787 | 1.1037  | 0.2652 | 0.0691  | 0.0389 | 0.1006 | 9.3516  | 0.7459 | -481.5191      |
| c_Bacilli | SmallVesselStroke   | MR Egger                  | 17 | 1.0657 | 0.9309 | 1.2201  | 0.3711 | -0.0078 | 0.0186 | 0.6807 | 17.8915 | 0.2684 | -74.7005       |
| c_Bacilli | SmallVesselStroke   | Weighted median           | 17 | 1.0356 | 0.9471 | 1.1324  | 0.4430 | -0.0078 | 0.0186 | 0.6807 | 17.8915 | 0.2684 | -74.7005       |
| c_Bacilli | SmallVesselStroke   | Inverse variance weighted | 17 | 1.0390 | 0.9753 | 1.1069  | 0.2364 | -0.0078 | 0.0186 | 0.6807 | 17.8915 | 0.2684 | -74.7005       |

|                      |                     |                           |    |        |        |        |        |         |        |        |         |        |             |
|----------------------|---------------------|---------------------------|----|--------|--------|--------|--------|---------|--------|--------|---------|--------|-------------|
| c_Bacilli            | SmallVesselStroke   | Simple mode               | 17 | 1.0410 | 0.8786 | 1.2335 | 0.6485 | -0.0078 | 0.0186 | 0.6807 | 17.8915 | 0.2684 | -74.7005    |
| c_Bacilli            | SmallVesselStroke   | Weighted mode             | 17 | 1.0246 | 0.8857 | 1.1853 | 0.7478 | -0.0078 | 0.0186 | 0.6807 | 17.8915 | 0.2684 | -74.7005    |
| c_Bacilli            | Stroke              | MR Egger                  | 19 | 0.9803 | 0.9180 | 1.0469 | 0.5606 | 0.0047  | 0.0087 | 0.5972 | 18.0113 | 0.3881 | -160.8676   |
| c_Bacilli            | Stroke              | Weighted median           | 19 | 0.9846 | 0.9464 | 1.0245 | 0.4441 | 0.0047  | 0.0087 | 0.5972 | 18.0113 | 0.3881 | -160.8676   |
| c_Bacilli            | Stroke              | Inverse variance weighted | 19 | 0.9962 | 0.9677 | 1.0256 | 0.7983 | 0.0047  | 0.0087 | 0.5972 | 18.0113 | 0.3881 | -160.8676   |
| c_Bacilli            | Stroke              | Simple mode               | 19 | 0.9694 | 0.9019 | 1.0419 | 0.4098 | 0.0047  | 0.0087 | 0.5972 | 18.0113 | 0.3881 | -160.8676   |
| c_Bacilli            | Stroke              | Weighted mode             | 19 | 0.9777 | 0.9122 | 1.0480 | 0.5328 | 0.0047  | 0.0087 | 0.5972 | 18.0113 | 0.3881 | -160.8676   |
| c_Betaproteobacteria | CardioEmbolicStroke | MR Egger                  | 15 | 1.2991 | 0.7474 | 2.2580 | 0.3704 | -0.0798 | 0.0880 | 0.3807 | 19.4714 | 0.1092 | -129.2864   |
| c_Betaproteobacteria | CardioEmbolicStroke | Weighted median           | 15 | 1.0530 | 0.9246 | 1.1993 | 0.4365 | -0.0798 | 0.0880 | 0.3807 | 19.4714 | 0.1092 | -129.2864   |
| c_Betaproteobacteria | CardioEmbolicStroke | Inverse variance weighted | 15 | 1.0109 | 0.9066 | 1.1272 | 0.8454 | -0.0798 | 0.0880 | 0.3807 | 19.4714 | 0.1092 | -129.2864   |
| c_Betaproteobacteria | CardioEmbolicStroke | Simple mode               | 15 | 1.1158 | 0.8927 | 1.3948 | 0.3520 | -0.0798 | 0.0880 | 0.3807 | 19.4714 | 0.1092 | -129.2864   |
| c_Betaproteobacteria | CardioEmbolicStroke | Weighted mode             | 15 | 1.1097 | 0.9003 | 1.3678 | 0.3457 | -0.0798 | 0.0880 | 0.3807 | 19.4714 | 0.1092 | -129.2864   |
| c_Betaproteobacteria | IschemicStroke      | MR Egger                  | 23 | 1.0064 | 0.9639 | 1.0507 | 0.7753 | -0.0028 | 0.0081 | 0.7311 | 21.7024 | 0.4168 | -72.7086    |
| c_Betaproteobacteria | IschemicStroke      | Weighted median           | 23 | 0.9941 | 0.9708 | 1.0181 | 0.6282 | -0.0028 | 0.0081 | 0.7311 | 21.7024 | 0.4168 | -72.7086    |
| c_Betaproteobacteria | IschemicStroke      | Inverse variance weighted | 23 | 0.9993 | 0.9824 | 1.0166 | 0.9403 | -0.0028 | 0.0081 | 0.7311 | 21.7024 | 0.4168 | -72.7086    |
| c_Betaproteobacteria | IschemicStroke      | Simple mode               | 23 | 0.9895 | 0.9458 | 1.0352 | 0.6513 | -0.0028 | 0.0081 | 0.7311 | 21.7024 | 0.4168 | -72.7086    |
| c_Betaproteobacteria | IschemicStroke      | Weighted mode             | 23 | 0.9889 | 0.9463 | 1.0335 | 0.6260 | -0.0028 | 0.0081 | 0.7311 | 21.7024 | 0.4168 | -72.7086    |
| c_Betaproteobacteria | LargeArteryStroke   | MR Egger                  | 19 | 1.2108 | 1.0181 | 1.4400 | 0.0451 | -0.0796 | 0.0304 | 0.0180 | 18.4653 | 0.4254 | -25.6534    |
| c_Betaproteobacteria | LargeArteryStroke   | Weighted median           | 19 | 0.9999 | 0.9166 | 1.0908 | 0.9982 | -0.0796 | 0.0304 | 0.0180 | 18.4653 | 0.4254 | -25.6534    |
| c_Betaproteobacteria | LargeArteryStroke   | Inverse variance weighted | 19 | 0.9742 | 0.9172 | 1.0348 | 0.3966 | -0.0796 | 0.0304 | 0.0180 | 18.4653 | 0.4254 | -25.6534    |
| c_Betaproteobacteria | LargeArteryStroke   | Simple mode               | 19 | 1.0507 | 0.8811 | 1.2530 | 0.5887 | -0.0796 | 0.0304 | 0.0180 | 18.4653 | 0.4254 | -25.6534    |
| c_Betaproteobacteria | LargeArteryStroke   | Weighted mode             | 19 | 1.0311 | 0.8665 | 1.2270 | 0.7339 | -0.0796 | 0.0304 | 0.0180 | 18.4653 | 0.4254 | -25.6534    |
| c_Betaproteobacteria | SmallVesselStroke   | MR Egger                  | 19 | 1.0120 | 0.9202 | 1.1129 | 0.8086 | -0.0045 | 0.0167 | 0.7909 | 10.1866 | 0.8956 | -93.6886    |
| c_Betaproteobacteria | SmallVesselStroke   | Weighted median           | 19 | 1.0030 | 0.9593 | 1.0487 | 0.8950 | -0.0045 | 0.0167 | 0.7909 | 10.1866 | 0.8956 | -93.6886    |
| c_Betaproteobacteria | SmallVesselStroke   | Inverse variance weighted | 19 | 0.9997 | 0.9673 | 1.0332 | 0.9848 | -0.0045 | 0.0167 | 0.7909 | 10.1866 | 0.8956 | -93.6886    |
| c_Betaproteobacteria | SmallVesselStroke   | Simple mode               | 19 | 1.0109 | 0.9353 | 1.0927 | 0.7870 | -0.0045 | 0.0167 | 0.7909 | 10.1866 | 0.8956 | -93.6886    |
| c_Betaproteobacteria | SmallVesselStroke   | Weighted mode             | 19 | 1.0088 | 0.9293 | 1.0952 | 0.8367 | -0.0045 | 0.0167 | 0.7909 | 10.1866 | 0.8956 | -93.6886    |
| c_Betaproteobacteria | Stroke              | MR Egger                  | 21 | 1.0140 | 0.9738 | 1.0559 | 0.5081 | -0.0054 | 0.0074 | 0.4744 | 17.0111 | 0.5891 | -125.5506   |
| c_Betaproteobacteria | Stroke              | Weighted median           | 21 | 0.9913 | 0.9713 | 1.0118 | 0.4036 | -0.0054 | 0.0074 | 0.4744 | 17.0111 | 0.5891 | -125.5506   |
| c_Betaproteobacteria | Stroke              | Inverse variance weighted | 21 | 0.9999 | 0.9850 | 1.0152 | 0.9944 | -0.0054 | 0.0074 | 0.4744 | 17.0111 | 0.5891 | -125.5506   |
| c_Betaproteobacteria | Stroke              | Simple mode               | 21 | 0.9847 | 0.9470 | 1.0240 | 0.4500 | -0.0054 | 0.0074 | 0.4744 | 17.0111 | 0.5891 | -125.5506   |
| c_Betaproteobacteria | Stroke              | Weighted mode             | 21 | 0.9855 | 0.9467 | 1.0258 | 0.4828 | -0.0054 | 0.0074 | 0.4744 | 17.0111 | 0.5891 | -125.5506   |
| c_Negativicutes      | CardioEmbolicStroke | MR Egger                  | 9  | 1.4636 | 0.7969 | 2.6883 | 0.2591 | -0.1061 | 0.0908 | 0.2812 | 6.4398  | 0.5981 | -57607.3063 |
| c_Negativicutes      | CardioEmbolicStroke | Weighted median           | 9  | 1.0667 | 0.8801 | 1.2929 | 0.5106 | -0.1061 | 0.0908 | 0.2812 | 6.4398  | 0.5981 | -57607.3063 |
| c_Negativicutes      | CardioEmbolicStroke | Inverse variance weighted | 9  | 1.0294 | 0.8914 | 1.1889 | 0.6929 | -0.1061 | 0.0908 | 0.2812 | 6.4398  | 0.5981 | -57607.3063 |
| c_Negativicutes      | CardioEmbolicStroke | Simple mode               | 9  | 1.0964 | 0.8188 | 1.4683 | 0.5538 | -0.1061 | 0.0908 | 0.2812 | 6.4398  | 0.5981 | -57607.3063 |
| c_Negativicutes      | CardioEmbolicStroke | Weighted mode             | 9  | 1.0848 | 0.8236 | 1.4287 | 0.5785 | -0.1061 | 0.0908 | 0.2812 | 6.4398  | 0.5981 | -57607.3063 |
| c_Negativicutes      | IschemicStroke      | MR Egger                  | 16 | 0.9965 | 0.9518 | 1.0433 | 0.8824 | 0.0015  | 0.0094 | 0.8795 | 15.5074 | 0.3444 | -54.1588    |
| c_Negativicutes      | IschemicStroke      | Weighted median           | 16 | 1.0074 | 0.9747 | 1.0411 | 0.6623 | 0.0015  | 0.0094 | 0.8795 | 15.5074 | 0.3444 | -54.1588    |
| c_Negativicutes      | IschemicStroke      | Inverse variance weighted | 16 | 0.9995 | 0.9763 | 1.0234 | 0.9692 | 0.0015  | 0.0094 | 0.8795 | 15.5074 | 0.3444 | -54.1588    |
| c_Negativicutes      | IschemicStroke      | Simple mode               | 16 | 1.0164 | 0.9582 | 1.0782 | 0.5964 | 0.0015  | 0.0094 | 0.8795 | 15.5074 | 0.3444 | -54.1588    |
| c_Negativicutes      | IschemicStroke      | Weighted mode             | 16 | 1.0184 | 0.9725 | 1.0665 | 0.4496 | 0.0015  | 0.0094 | 0.8795 | 15.5074 | 0.3444 | -54.1588    |
| c_Negativicutes      | LargeArteryStroke   | MR Egger                  | 12 | 1.0475 | 0.8506 | 1.2900 | 0.6717 | -0.0202 | 0.0366 | 0.5933 | 7.9213  | 0.6365 | -61.9529    |
| c_Negativicutes      | LargeArteryStroke   | Weighted median           | 12 | 1.0017 | 0.8844 | 1.1346 | 0.9782 | -0.0202 | 0.0366 | 0.5933 | 7.9213  | 0.6365 | -61.9529    |
| c_Negativicutes      | LargeArteryStroke   | Inverse variance weighted | 12 | 0.9935 | 0.9086 | 1.0862 | 0.8854 | -0.0202 | 0.0366 | 0.5933 | 7.9213  | 0.6365 | -61.9529    |
| c_Negativicutes      | LargeArteryStroke   | Simple mode               | 12 | 0.9530 | 0.7893 | 1.1506 | 0.6265 | -0.0202 | 0.0366 | 0.5933 | 7.9213  | 0.6365 | -61.9529    |
| c_Negativicutes      | LargeArteryStroke   | Weighted mode             | 12 | 0.9889 | 0.8430 | 1.1601 | 0.8937 | -0.0202 | 0.0366 | 0.5933 | 7.9213  | 0.6365 | -61.9529    |
| c_Negativicutes      | SmallVesselStroke   | MR Egger                  | 12 | 1.0111 | 0.8998 | 1.1362 | 0.8568 | 0.0235  | 0.0204 | 0.2772 | 10.7747 | 0.4623 | -98.1588    |
| c_Negativicutes      | SmallVesselStroke   | Weighted median           | 12 | 1.0720 | 0.9980 | 1.1514 | 0.0567 | 0.0235  | 0.0204 | 0.2772 | 10.7747 | 0.4623 | -98.1588    |
| c_Negativicutes      | SmallVesselStroke   | Inverse variance weighted | 12 | 1.0756 | 1.0232 | 1.1306 | 0.0042 | 0.0235  | 0.0204 | 0.2772 | 10.7747 | 0.4623 | -98.1588    |
| c_Negativicutes      | SmallVesselStroke   | Simple mode               | 12 | 1.0918 | 0.9791 | 1.2175 | 0.1425 | 0.0235  | 0.0204 | 0.2772 | 10.7747 | 0.4623 | -98.1588    |
| c_Negativicutes      | SmallVesselStroke   | Weighted mode             | 12 | 1.0798 | 0.9881 | 1.1800 | 0.1179 | 0.0235  | 0.0204 | 0.2772 | 10.7747 | 0.4623 | -98.1588    |
| c_Negativicutes      | Stroke              | MR Egger                  | 15 | 1.0038 | 0.9587 | 1.0511 | 0.8736 | 0.0039  | 0.0086 | 0.6578 | 12.1065 | 0.5189 | -57.9854    |

|                      |                     |                           |    |        |        |        |        |         |        |        |         |        |             |
|----------------------|---------------------|---------------------------|----|--------|--------|--------|--------|---------|--------|--------|---------|--------|-------------|
| c_Negativicutes      | Stroke              | Weighted median           | 15 | 1.0092 | 0.9801 | 1.0392 | 0.5389 | 0.0039  | 0.0086 | 0.6578 | 12.1065 | 0.5189 | -57.9854    |
| c_Negativicutes      | Stroke              | Inverse variance weighted | 15 | 1.0133 | 0.9914 | 1.0356 | 0.2358 | 0.0039  | 0.0086 | 0.6578 | 12.1065 | 0.5189 | -57.9854    |
| c_Negativicutes      | Stroke              | Simple mode               | 15 | 0.9982 | 0.9514 | 1.0473 | 0.9417 | 0.0039  | 0.0086 | 0.6578 | 12.1065 | 0.5189 | -57.9854    |
| c_Negativicutes      | Stroke              | Weighted mode             | 15 | 1.0079 | 0.9670 | 1.0506 | 0.7141 | 0.0039  | 0.0086 | 0.6578 | 12.1065 | 0.5189 | -57.9854    |
| f_Acidaminococcaceae | CardioEmbolicStroke | MR Egger                  | 10 | 1.2964 | 0.9512 | 1.7668 | 0.1389 | -0.0898 | 0.0649 | 0.2035 | 11.5705 | 0.2386 | -57.2624    |
| f_Acidaminococcaceae | CardioEmbolicStroke | Weighted median           | 10 | 1.0349 | 0.8883 | 1.2056 | 0.6599 | -0.0898 | 0.0649 | 0.2035 | 11.5705 | 0.2386 | -57.2624    |
| f_Acidaminococcaceae | CardioEmbolicStroke | Inverse variance weighted | 10 | 1.0584 | 0.9371 | 1.1953 | 0.3608 | -0.0898 | 0.0649 | 0.2035 | 11.5705 | 0.2386 | -57.2624    |
| f_Acidaminococcaceae | CardioEmbolicStroke | Simple mode               | 10 | 0.9767 | 0.7354 | 1.2972 | 0.8742 | -0.0898 | 0.0649 | 0.2035 | 11.5705 | 0.2386 | -57.2624    |
| f_Acidaminococcaceae | CardioEmbolicStroke | Weighted mode             | 10 | 1.1961 | 0.9254 | 1.5461 | 0.2046 | -0.0898 | 0.0649 | 0.2035 | 11.5705 | 0.2386 | -57.2624    |
| f_Acidaminococcaceae | IschemicStroke      | MR Egger                  | 17 | 1.0018 | 0.9661 | 1.0389 | 0.9222 | -0.0007 | 0.0096 | 0.9452 | 9.2986  | 0.8614 | -65.4873    |
| f_Acidaminococcaceae | IschemicStroke      | Weighted median           | 17 | 1.0106 | 0.9862 | 1.0355 | 0.3978 | -0.0007 | 0.0096 | 0.9452 | 9.2986  | 0.8614 | -65.4873    |
| f_Acidaminococcaceae | IschemicStroke      | Inverse variance weighted | 17 | 1.0007 | 0.9824 | 1.0194 | 0.9387 | -0.0007 | 0.0096 | 0.9452 | 9.2986  | 0.8614 | -65.4873    |
| f_Acidaminococcaceae | IschemicStroke      | Simple mode               | 17 | 1.0113 | 0.9747 | 1.0493 | 0.5584 | -0.0007 | 0.0096 | 0.9452 | 9.2986  | 0.8614 | -65.4873    |
| f_Acidaminococcaceae | IschemicStroke      | Weighted mode             | 17 | 1.0116 | 0.9825 | 1.0417 | 0.4495 | -0.0007 | 0.0096 | 0.9452 | 9.2986  | 0.8614 | -65.4873    |
| f_Acidaminococcaceae | LargeArteryStroke   | MR Egger                  | 14 | 1.0824 | 0.9573 | 1.2240 | 0.2304 | -0.0537 | 0.0315 | 0.1137 | 11.4785 | 0.5708 | -12.4782    |
| f_Acidaminococcaceae | LargeArteryStroke   | Weighted median           | 14 | 1.0102 | 0.9227 | 1.1060 | 0.8261 | -0.0537 | 0.0315 | 0.1137 | 11.4785 | 0.5708 | -12.4782    |
| f_Acidaminococcaceae | LargeArteryStroke   | Inverse variance weighted | 14 | 0.9875 | 0.9271 | 1.0520 | 0.6973 | -0.0537 | 0.0315 | 0.1137 | 11.4785 | 0.5708 | -12.4782    |
| f_Acidaminococcaceae | LargeArteryStroke   | Simple mode               | 14 | 0.8996 | 0.7480 | 1.0820 | 0.2816 | -0.0537 | 0.0315 | 0.1137 | 11.4785 | 0.5708 | -12.4782    |
| f_Acidaminococcaceae | LargeArteryStroke   | Weighted mode             | 14 | 1.0883 | 0.9283 | 1.2758 | 0.3158 | -0.0537 | 0.0315 | 0.1137 | 11.4785 | 0.5708 | -12.4782    |
| f_Acidaminococcaceae | SmallVesselStroke   | MR Egger                  | 15 | 1.0072 | 0.9391 | 1.0801 | 0.8444 | 0.0023  | 0.0178 | 0.8975 | 5.7623  | 0.9544 | -60.1147    |
| f_Acidaminococcaceae | SmallVesselStroke   | Weighted median           | 15 | 0.9968 | 0.9486 | 1.0474 | 0.8989 | 0.0023  | 0.0178 | 0.8975 | 5.7623  | 0.9544 | -60.1147    |
| f_Acidaminococcaceae | SmallVesselStroke   | Inverse variance weighted | 15 | 1.0113 | 0.9764 | 1.0474 | 0.5317 | 0.0023  | 0.0178 | 0.8975 | 5.7623  | 0.9544 | -60.1147    |
| f_Acidaminococcaceae | SmallVesselStroke   | Simple mode               | 15 | 0.9873 | 0.9118 | 1.0691 | 0.7580 | 0.0023  | 0.0178 | 0.8975 | 5.7623  | 0.9544 | -60.1147    |
| f_Acidaminococcaceae | SmallVesselStroke   | Weighted mode             | 15 | 0.9841 | 0.9182 | 1.0548 | 0.6580 | 0.0023  | 0.0178 | 0.8975 | 5.7623  | 0.9544 | -60.1147    |
| f_Acidaminococcaceae | Stroke              | MR Egger                  | 17 | 0.9968 | 0.9630 | 1.0318 | 0.8578 | 0.0006  | 0.0087 | 0.9465 | 9.3416  | 0.8590 | -70.7684    |
| f_Acidaminococcaceae | Stroke              | Weighted median           | 17 | 0.9987 | 0.9769 | 1.0210 | 0.9059 | 0.0006  | 0.0087 | 0.9465 | 9.3416  | 0.8590 | -70.7684    |
| f_Acidaminococcaceae | Stroke              | Inverse variance weighted | 17 | 0.9978 | 0.9814 | 1.0145 | 0.7987 | 0.0006  | 0.0087 | 0.9465 | 9.3416  | 0.8590 | -70.7684    |
| f_Acidaminococcaceae | Stroke              | Simple mode               | 17 | 1.0092 | 0.9706 | 1.0492 | 0.6524 | 0.0006  | 0.0087 | 0.9465 | 9.3416  | 0.8590 | -70.7684    |
| f_Acidaminococcaceae | Stroke              | Weighted mode             | 17 | 1.0084 | 0.9721 | 1.0459 | 0.6620 | 0.0006  | 0.0087 | 0.9465 | 9.3416  | 0.8590 | -70.7684    |
| f_Actinomycetaceae   | CardioEmbolicStroke | MR Egger                  | 13 | 1.5050 | 0.8201 | 2.7621 | 0.2137 | -0.0956 | 0.0566 | 0.1194 | 12.5807 | 0.4002 | 175.6523    |
| f_Actinomycetaceae   | CardioEmbolicStroke | Weighted median           | 13 | 0.9000 | 0.6843 | 1.1838 | 0.4514 | -0.0956 | 0.0566 | 0.1194 | 12.5807 | 0.4002 | 175.6523    |
| f_Actinomycetaceae   | CardioEmbolicStroke | Inverse variance weighted | 13 | 0.9174 | 0.7503 | 1.1216 | 0.4003 | -0.0956 | 0.0566 | 0.1194 | 12.5807 | 0.4002 | 175.6523    |
| f_Actinomycetaceae   | CardioEmbolicStroke | Simple mode               | 13 | 0.8585 | 0.5456 | 1.3509 | 0.5221 | -0.0956 | 0.0566 | 0.1194 | 12.5807 | 0.4002 | 175.6523    |
| f_Actinomycetaceae   | CardioEmbolicStroke | Weighted mode             | 13 | 0.8770 | 0.5914 | 1.3006 | 0.5263 | -0.0956 | 0.0566 | 0.1194 | 12.5807 | 0.4002 | 175.6523    |
| f_Actinomycetaceae   | IschemicStroke      | MR Egger                  | 19 | 0.9786 | 0.8889 | 1.0773 | 0.6639 | -0.0017 | 0.0103 | 0.8672 | 21.6490 | 0.1986 | -220.6070   |
| f_Actinomycetaceae   | IschemicStroke      | Weighted median           | 19 | 0.9794 | 0.9266 | 1.0352 | 0.4615 | -0.0017 | 0.0103 | 0.8672 | 21.6490 | 0.1986 | -220.6070   |
| f_Actinomycetaceae   | IschemicStroke      | Inverse variance weighted | 19 | 0.9713 | 0.9318 | 1.0124 | 0.1684 | -0.0017 | 0.0103 | 0.8672 | 21.6490 | 0.1986 | -220.6070   |
| f_Actinomycetaceae   | IschemicStroke      | Simple mode               | 19 | 0.9541 | 0.8692 | 1.0473 | 0.3365 | -0.0017 | 0.0103 | 0.8672 | 21.6490 | 0.1986 | -220.6070   |
| f_Actinomycetaceae   | IschemicStroke      | Weighted mode             | 19 | 0.9829 | 0.9004 | 1.0730 | 0.7044 | -0.0017 | 0.0103 | 0.8672 | 21.6490 | 0.1986 | -220.6070   |
| f_Actinomycetaceae   | LargeArteryStroke   | MR Egger                  | 14 | 1.4035 | 0.9726 | 2.0254 | 0.0951 | -0.0643 | 0.0361 | 0.1003 | 12.3461 | 0.4995 | 3649.6266   |
| f_Actinomycetaceae   | LargeArteryStroke   | Weighted median           | 14 | 1.0713 | 0.8833 | 1.2994 | 0.4842 | -0.0643 | 0.0361 | 0.1003 | 12.3461 | 0.4995 | 3649.6266   |
| f_Actinomycetaceae   | LargeArteryStroke   | Inverse variance weighted | 14 | 1.0306 | 0.8981 | 1.1827 | 0.6674 | -0.0643 | 0.0361 | 0.1003 | 12.3461 | 0.4995 | 3649.6266   |
| f_Actinomycetaceae   | LargeArteryStroke   | Simple mode               | 14 | 1.0547 | 0.7678 | 1.4487 | 0.7476 | -0.0643 | 0.0361 | 0.1003 | 12.3461 | 0.4995 | 3649.6266   |
| f_Actinomycetaceae   | LargeArteryStroke   | Weighted mode             | 14 | 1.0754 | 0.8129 | 1.4226 | 0.6191 | -0.0643 | 0.0361 | 0.1003 | 12.3461 | 0.4995 | 3649.6266   |
| f_Actinomycetaceae   | SmallVesselStroke   | MR Egger                  | 16 | 0.8994 | 0.7129 | 1.1347 | 0.3863 | 0.0102  | 0.0231 | 0.6652 | 19.5764 | 0.1441 | -22907.2756 |
| f_Actinomycetaceae   | SmallVesselStroke   | Weighted median           | 16 | 0.9257 | 0.8282 | 1.0347 | 0.1742 | 0.0102  | 0.0231 | 0.6652 | 19.5764 | 0.1441 | -22907.2756 |
| f_Actinomycetaceae   | SmallVesselStroke   | Inverse variance weighted | 16 | 0.9441 | 0.8667 | 1.0285 | 0.1878 | 0.0102  | 0.0231 | 0.6652 | 19.5764 | 0.1441 | -22907.2756 |
| f_Actinomycetaceae   | SmallVesselStroke   | Simple mode               | 16 | 0.8876 | 0.7484 | 1.0526 | 0.1906 | 0.0102  | 0.0231 | 0.6652 | 19.5764 | 0.1441 | -22907.2756 |
| f_Actinomycetaceae   | SmallVesselStroke   | Weighted mode             | 16 | 0.8951 | 0.7453 | 1.0751 | 0.2543 | 0.0102  | 0.0231 | 0.6652 | 19.5764 | 0.1441 | -22907.2756 |
| f_Actinomycetaceae   | Stroke              | MR Egger                  | 22 | 0.9344 | 0.8419 | 1.0371 | 0.2170 | 0.0082  | 0.0106 | 0.4478 | 27.9080 | 0.1116 | -306.5102   |
| f_Actinomycetaceae   | Stroke              | Weighted median           | 22 | 0.9672 | 0.9193 | 1.0177 | 0.1989 | 0.0082  | 0.0106 | 0.4478 | 27.9080 | 0.1116 | -306.5102   |
| f_Actinomycetaceae   | Stroke              | Inverse variance weighted | 22 | 0.9707 | 0.9335 | 1.0095 | 0.1372 | 0.0082  | 0.0106 | 0.4478 | 27.9080 | 0.1116 | -306.5102   |
| f_Actinomycetaceae   | Stroke              | Simple mode               | 22 | 0.9493 | 0.8670 | 1.0394 | 0.2734 | 0.0082  | 0.0106 | 0.4478 | 27.9080 | 0.1116 | -306.5102   |

|                      |                     |                           |    |        |        |        |        |         |        |        |         |        |           |
|----------------------|---------------------|---------------------------|----|--------|--------|--------|--------|---------|--------|--------|---------|--------|-----------|
| f_Actinomycetaceae   | Stroke              | Weighted mode             | 22 | 0.9493 | 0.8837 | 1.0198 | 0.1690 | 0.0082  | 0.0106 | 0.4478 | 27.9080 | 0.1116 | -306.5102 |
| f_Aerococcaceae      | CardioEmbolicStroke | MR Egger                  | 5  | 1.2978 | 0.3582 | 4.7019 | 0.7180 | -0.1055 | 0.1916 | 0.6202 | 1.1383  | 0.7678 | 220.3151  |
| f_Aerococcaceae      | CardioEmbolicStroke | Weighted median           | 5  | 0.9155 | 0.7000 | 1.1973 | 0.5190 | -0.1055 | 0.1916 | 0.6202 | 1.1383  | 0.7678 | 220.3151  |
| f_Aerococcaceae      | CardioEmbolicStroke | Inverse variance weighted | 5  | 0.9081 | 0.7390 | 1.1159 | 0.3594 | -0.1055 | 0.1916 | 0.6202 | 1.1383  | 0.7678 | 220.3151  |
| f_Aerococcaceae      | CardioEmbolicStroke | Simple mode               | 5  | 0.9778 | 0.6988 | 1.3681 | 0.9021 | -0.1055 | 0.1916 | 0.6202 | 1.1383  | 0.7678 | 220.3151  |
| f_Aerococcaceae      | CardioEmbolicStroke | Weighted mode             | 5  | 0.9326 | 0.6856 | 1.2685 | 0.6795 | -0.1055 | 0.1916 | 0.6202 | 1.1383  | 0.7678 | 220.3151  |
| f_Aerococcaceae      | IschemicStroke      | MR Egger                  | 14 | 1.0545 | 0.9901 | 1.1231 | 0.1245 | -0.0244 | 0.0138 | 0.1024 | 21.0372 | 0.0722 | -55.3713  |
| f_Aerococcaceae      | IschemicStroke      | Weighted median           | 14 | 1.0187 | 0.9791 | 1.0598 | 0.3605 | -0.0244 | 0.0138 | 0.1024 | 21.0372 | 0.0722 | -55.3713  |
| f_Aerococcaceae      | IschemicStroke      | Inverse variance weighted | 14 | 1.0042 | 0.9701 | 1.0394 | 0.8141 | -0.0244 | 0.0138 | 0.1024 | 21.0372 | 0.0722 | -55.3713  |
| f_Aerococcaceae      | IschemicStroke      | Simple mode               | 14 | 1.0307 | 0.9712 | 1.0938 | 0.3373 | -0.0244 | 0.0138 | 0.1024 | 21.0372 | 0.0722 | -55.3713  |
| f_Aerococcaceae      | IschemicStroke      | Weighted mode             | 14 | 1.0251 | 0.9682 | 1.0854 | 0.4103 | -0.0244 | 0.0138 | 0.1024 | 21.0372 | 0.0722 | -55.3713  |
| f_Aerococcaceae      | LargeArteryStroke   | MR Egger                  | 10 | 1.0356 | 0.7602 | 1.4108 | 0.8301 | -0.0008 | 0.0647 | 0.9909 | 16.8045 | 0.0322 | -16.9509  |
| f_Aerococcaceae      | LargeArteryStroke   | Weighted median           | 10 | 1.0891 | 0.9384 | 1.2640 | 0.2612 | -0.0008 | 0.0647 | 0.9909 | 16.8045 | 0.0322 | -16.9509  |
| f_Aerococcaceae      | LargeArteryStroke   | Inverse variance weighted | 10 | 1.0339 | 0.9032 | 1.1835 | 0.6289 | -0.0008 | 0.0647 | 0.9909 | 16.8045 | 0.0322 | -16.9509  |
| f_Aerococcaceae      | LargeArteryStroke   | Simple mode               | 10 | 0.9121 | 0.7003 | 1.1878 | 0.5118 | -0.0008 | 0.0647 | 0.9909 | 16.8045 | 0.0322 | -16.9509  |
| f_Aerococcaceae      | LargeArteryStroke   | Weighted mode             | 10 | 1.0486 | 0.8523 | 1.2902 | 0.6641 | -0.0008 | 0.0647 | 0.9909 | 16.8045 | 0.0322 | -16.9509  |
| f_Aerococcaceae      | SmallVesselStroke   | MR Egger                  | 11 | 1.1332 | 0.9720 | 1.3211 | 0.1448 | -0.0460 | 0.0321 | 0.1851 | 18.0803 | 0.0536 | -52.2117  |
| f_Aerococcaceae      | SmallVesselStroke   | Weighted median           | 11 | 1.0247 | 0.9424 | 1.1142 | 0.5675 | -0.0460 | 0.0321 | 0.1851 | 18.0803 | 0.0536 | -52.2117  |
| f_Aerococcaceae      | SmallVesselStroke   | Inverse variance weighted | 11 | 1.0255 | 0.9523 | 1.1044 | 0.5050 | -0.0460 | 0.0321 | 0.1851 | 18.0803 | 0.0536 | -52.2117  |
| f_Aerococcaceae      | SmallVesselStroke   | Simple mode               | 11 | 1.0091 | 0.9078 | 1.1218 | 0.8699 | -0.0460 | 0.0321 | 0.1851 | 18.0803 | 0.0536 | -52.2117  |
| f_Aerococcaceae      | SmallVesselStroke   | Weighted mode             | 11 | 1.0221 | 0.9157 | 1.1408 | 0.7048 | -0.0460 | 0.0321 | 0.1851 | 18.0803 | 0.0536 | -52.2117  |
| f_Aerococcaceae      | Stroke              | MR Egger                  | 13 | 1.0067 | 0.9284 | 1.0916 | 0.8752 | -0.0027 | 0.0163 | 0.8695 | 22.7579 | 0.0191 | -119.6756 |
| f_Aerococcaceae      | Stroke              | Weighted median           | 13 | 1.0086 | 0.9674 | 1.0516 | 0.6871 | -0.0027 | 0.0163 | 0.8695 | 22.7579 | 0.0191 | -119.6756 |
| f_Aerococcaceae      | Stroke              | Inverse variance weighted | 13 | 1.0004 | 0.9660 | 1.0361 | 0.9805 | -0.0027 | 0.0163 | 0.8695 | 22.7579 | 0.0191 | -119.6756 |
| f_Aerococcaceae      | Stroke              | Simple mode               | 13 | 1.0236 | 0.9602 | 1.0911 | 0.4889 | -0.0027 | 0.0163 | 0.8695 | 22.7579 | 0.0191 | -119.6756 |
| f_Aerococcaceae      | Stroke              | Weighted mode             | 13 | 1.0255 | 0.9643 | 1.0905 | 0.4384 | -0.0027 | 0.0163 | 0.8695 | 22.7579 | 0.0191 | -119.6756 |
| f_Bacillaceae        | CardioEmbolicStroke | MR Egger                  | 11 | 1.2520 | 0.5986 | 2.6189 | 0.5653 | -0.0486 | 0.0788 | 0.5524 | 7.3664  | 0.5990 | 401.4926  |
| f_Bacillaceae        | CardioEmbolicStroke | Weighted median           | 11 | 0.9314 | 0.7387 | 1.1743 | 0.5478 | -0.0486 | 0.0788 | 0.5524 | 7.3664  | 0.5990 | 401.4926  |
| f_Bacillaceae        | CardioEmbolicStroke | Inverse variance weighted | 11 | 0.9988 | 0.8409 | 1.1863 | 0.9888 | -0.0486 | 0.0788 | 0.5524 | 7.3664  | 0.5990 | 401.4926  |
| f_Bacillaceae        | CardioEmbolicStroke | Simple mode               | 11 | 0.8452 | 0.5612 | 1.2731 | 0.4397 | -0.0486 | 0.0788 | 0.5524 | 7.3664  | 0.5990 | 401.4926  |
| f_Bacillaceae        | CardioEmbolicStroke | Weighted mode             | 11 | 0.8508 | 0.5709 | 1.2680 | 0.4459 | -0.0486 | 0.0788 | 0.5524 | 7.3664  | 0.5990 | 401.4926  |
| f_Bacillaceae        | IschemicStroke      | MR Egger                  | 23 | 1.0003 | 0.9574 | 1.0451 | 0.9908 | 0.0007  | 0.0076 | 0.9298 | 27.2331 | 0.1633 | -38.8722  |
| f_Bacillaceae        | IschemicStroke      | Weighted median           | 23 | 1.0027 | 0.9689 | 1.0377 | 0.8766 | 0.0007  | 0.0076 | 0.9298 | 27.2331 | 0.1633 | -38.8722  |
| f_Bacillaceae        | IschemicStroke      | Inverse variance weighted | 23 | 1.0019 | 0.9768 | 1.0276 | 0.8854 | 0.0007  | 0.0076 | 0.9298 | 27.2331 | 0.1633 | -38.8722  |
| f_Bacillaceae        | IschemicStroke      | Simple mode               | 23 | 1.0192 | 0.9615 | 1.0804 | 0.5290 | 0.0007  | 0.0076 | 0.9298 | 27.2331 | 0.1633 | -38.8722  |
| f_Bacillaceae        | IschemicStroke      | Weighted mode             | 23 | 1.0033 | 0.9600 | 1.0486 | 0.8839 | 0.0007  | 0.0076 | 0.9298 | 27.2331 | 0.1633 | -38.8722  |
| f_Bacillaceae        | LargeArteryStroke   | MR Egger                  | 16 | 0.9427 | 0.7819 | 1.1366 | 0.5461 | 0.0050  | 0.0270 | 0.8571 | 16.4570 | 0.2863 | -46.5406  |
| f_Bacillaceae        | LargeArteryStroke   | Weighted median           | 16 | 0.9179 | 0.8067 | 1.0444 | 0.1936 | 0.0050  | 0.0270 | 0.8571 | 16.4570 | 0.2863 | -46.5406  |
| f_Bacillaceae        | LargeArteryStroke   | Inverse variance weighted | 16 | 0.9568 | 0.8697 | 1.0526 | 0.3642 | 0.0050  | 0.0270 | 0.8571 | 16.4570 | 0.2863 | -46.5406  |
| f_Bacillaceae        | LargeArteryStroke   | Simple mode               | 16 | 0.9023 | 0.7366 | 1.1053 | 0.3364 | 0.0050  | 0.0270 | 0.8571 | 16.4570 | 0.2863 | -46.5406  |
| f_Bacillaceae        | LargeArteryStroke   | Weighted mode             | 16 | 0.9097 | 0.7834 | 1.0564 | 0.2336 | 0.0050  | 0.0270 | 0.8571 | 16.4570 | 0.2863 | -46.5406  |
| f_Bacillaceae        | SmallVesselStroke   | MR Egger                  | 20 | 0.9266 | 0.8581 | 1.0005 | 0.0673 | 0.0192  | 0.0126 | 0.1440 | 12.8116 | 0.8481 | -34.7506  |
| f_Bacillaceae        | SmallVesselStroke   | Weighted median           | 20 | 0.9557 | 0.8960 | 1.0194 | 0.1684 | 0.0192  | 0.0126 | 0.1440 | 12.8116 | 0.8481 | -34.7506  |
| f_Bacillaceae        | SmallVesselStroke   | Inverse variance weighted | 20 | 0.9731 | 0.9313 | 1.0169 | 0.2249 | 0.0192  | 0.0126 | 0.1440 | 12.8116 | 0.8481 | -34.7506  |
| f_Bacillaceae        | SmallVesselStroke   | Simple mode               | 20 | 0.9325 | 0.8260 | 1.0528 | 0.2729 | 0.0192  | 0.0126 | 0.1440 | 12.8116 | 0.8481 | -34.7506  |
| f_Bacillaceae        | SmallVesselStroke   | Weighted mode             | 20 | 0.9287 | 0.8421 | 1.0241 | 0.1545 | 0.0192  | 0.0126 | 0.1440 | 12.8116 | 0.8481 | -34.7506  |
| f_Bacillaceae        | Stroke              | MR Egger                  | 25 | 0.9969 | 0.9596 | 1.0356 | 0.8736 | 0.0018  | 0.0061 | 0.7726 | 18.7185 | 0.7174 | -46.6210  |
| f_Bacillaceae        | Stroke              | Weighted median           | 25 | 1.0042 | 0.9752 | 1.0340 | 0.7803 | 0.0018  | 0.0061 | 0.7726 | 18.7185 | 0.7174 | -46.6210  |
| f_Bacillaceae        | Stroke              | Inverse variance weighted | 25 | 1.0016 | 0.9809 | 1.0228 | 0.8787 | 0.0018  | 0.0061 | 0.7726 | 18.7185 | 0.7174 | -46.6210  |
| f_Bacillaceae        | Stroke              | Simple mode               | 25 | 1.0092 | 0.9599 | 1.0611 | 0.7229 | 0.0018  | 0.0061 | 0.7726 | 18.7185 | 0.7174 | -46.6210  |
| f_Bacillaceae        | Stroke              | Weighted mode             | 25 | 1.0071 | 0.9655 | 1.0505 | 0.7449 | 0.0018  | 0.0061 | 0.7726 | 18.7185 | 0.7174 | -46.6210  |
| f_Bifidobacteriaceae | CardioEmbolicStroke | MR Egger                  | 14 | 1.1120 | 0.7011 | 1.7636 | 0.6599 | -0.0511 | 0.0924 | 0.5909 | 6.8928  | 0.8646 | -77.2606  |
| f_Bifidobacteriaceae | CardioEmbolicStroke | Weighted median           | 14 | 0.9817 | 0.8527 | 1.1302 | 0.7971 | -0.0511 | 0.0924 | 0.5909 | 6.8928  | 0.8646 | -77.2606  |

|                                   |                     |                           |    |        |        |        |        |         |        |        |         |        |            |
|-----------------------------------|---------------------|---------------------------|----|--------|--------|--------|--------|---------|--------|--------|---------|--------|------------|
| f_Bifidobacteriaceae              | CardioEmbolicStroke | Inverse variance weighted | 14 | 0.9798 | 0.8820 | 1.0885 | 0.7040 | -0.0511 | 0.0924 | 0.5909 | 6.8928  | 0.8646 | -77.2606   |
| f_Bifidobacteriaceae              | CardioEmbolicStroke | Simple mode               | 14 | 0.9660 | 0.7605 | 1.2270 | 0.7814 | -0.0511 | 0.0924 | 0.5909 | 6.8928  | 0.8646 | -77.2606   |
| f_Bifidobacteriaceae              | CardioEmbolicStroke | Weighted mode             | 14 | 0.9781 | 0.7808 | 1.2252 | 0.8499 | -0.0511 | 0.0924 | 0.5909 | 6.8928  | 0.8646 | -77.2606   |
| f_Bifidobacteriaceae              | IschemicStroke      | MR Egger                  | 18 | 0.9750 | 0.9156 | 1.0384 | 0.4424 | 0.0177  | 0.0138 | 0.2184 | 14.5614 | 0.6270 | -111.0818  |
| f_Bifidobacteriaceae              | IschemicStroke      | Weighted median           | 18 | 0.9978 | 0.9679 | 1.0286 | 0.8872 | 0.0177  | 0.0138 | 0.2184 | 14.5614 | 0.6270 | -111.0818  |
| f_Bifidobacteriaceae              | IschemicStroke      | Inverse variance weighted | 18 | 1.0136 | 0.9926 | 1.0350 | 0.2062 | 0.0177  | 0.0138 | 0.2184 | 14.5614 | 0.6270 | -111.0818  |
| f_Bifidobacteriaceae              | IschemicStroke      | Simple mode               | 18 | 0.9969 | 0.9452 | 1.0514 | 0.9090 | 0.0177  | 0.0138 | 0.2184 | 14.5614 | 0.6270 | -111.0818  |
| f_Bifidobacteriaceae              | IschemicStroke      | Weighted mode             | 18 | 0.9914 | 0.9446 | 1.0404 | 0.7291 | 0.0177  | 0.0138 | 0.2184 | 14.5614 | 0.6270 | -111.0818  |
| f_Bifidobacteriaceae              | LargeArteryStroke   | MR Egger                  | 16 | 1.1402 | 0.9066 | 1.4339 | 0.2809 | -0.0383 | 0.0502 | 0.4574 | 16.7102 | 0.2720 | -15.4491   |
| f_Bifidobacteriaceae              | LargeArteryStroke   | Weighted median           | 16 | 1.0413 | 0.9392 | 1.1545 | 0.4420 | -0.0383 | 0.0502 | 0.4574 | 16.7102 | 0.2720 | -15.4491   |
| f_Bifidobacteriaceae              | LargeArteryStroke   | Inverse variance weighted | 16 | 1.0481 | 0.9714 | 1.1309 | 0.2254 | -0.0383 | 0.0502 | 0.4574 | 16.7102 | 0.2720 | -15.4491   |
| f_Bifidobacteriaceae              | LargeArteryStroke   | Simple mode               | 16 | 0.9653 | 0.8096 | 1.1509 | 0.6995 | -0.0383 | 0.0502 | 0.4574 | 16.7102 | 0.2720 | -15.4491   |
| f_Bifidobacteriaceae              | LargeArteryStroke   | Weighted mode             | 16 | 1.0131 | 0.8670 | 1.1838 | 0.8723 | -0.0383 | 0.0502 | 0.4574 | 16.7102 | 0.2720 | -15.4491   |
| f_Bifidobacteriaceae              | SmallVesselStroke   | MR Egger                  | 16 | 1.0193 | 0.9077 | 1.1445 | 0.7515 | 0.0012  | 0.0254 | 0.9629 | 13.8882 | 0.4581 | -69.0434   |
| f_Bifidobacteriaceae              | SmallVesselStroke   | Weighted median           | 16 | 1.0159 | 0.9617 | 1.0733 | 0.5725 | 0.0012  | 0.0254 | 0.9629 | 13.8882 | 0.4581 | -69.0434   |
| f_Bifidobacteriaceae              | SmallVesselStroke   | Inverse variance weighted | 16 | 1.0220 | 0.9827 | 1.0628 | 0.2774 | 0.0012  | 0.0254 | 0.9629 | 13.8882 | 0.4581 | -69.0434   |
| f_Bifidobacteriaceae              | SmallVesselStroke   | Simple mode               | 16 | 1.0520 | 0.9542 | 1.1599 | 0.3250 | 0.0012  | 0.0254 | 0.9629 | 13.8882 | 0.4581 | -69.0434   |
| f_Bifidobacteriaceae              | SmallVesselStroke   | Weighted mode             | 16 | 0.9919 | 0.9063 | 1.0856 | 0.8619 | 0.0012  | 0.0254 | 0.9629 | 13.8882 | 0.4581 | -69.0434   |
| f_Bifidobacteriaceae              | Stroke              | MR Egger                  | 18 | 0.9880 | 0.9348 | 1.0442 | 0.6743 | 0.0113  | 0.0120 | 0.3594 | 13.7510 | 0.6173 | -172.4670  |
| f_Bifidobacteriaceae              | Stroke              | Weighted median           | 18 | 1.0207 | 0.9952 | 1.0469 | 0.1121 | 0.0113  | 0.0120 | 0.3594 | 13.7510 | 0.6173 | -172.4670  |
| f_Bifidobacteriaceae              | Stroke              | Inverse variance weighted | 18 | 1.0132 | 0.9952 | 1.0315 | 0.1507 | 0.0113  | 0.0120 | 0.3594 | 13.7510 | 0.6173 | -172.4670  |
| f_Bifidobacteriaceae              | Stroke              | Simple mode               | 18 | 1.0290 | 0.9789 | 1.0815 | 0.2773 | 0.0113  | 0.0120 | 0.3594 | 13.7510 | 0.6173 | -172.4670  |
| f_Bifidobacteriaceae              | Stroke              | Weighted mode             | 18 | 1.0332 | 0.9850 | 1.0838 | 0.1975 | 0.0113  | 0.0120 | 0.3594 | 13.7510 | 0.6173 | -172.4670  |
| f_Burkholderiaceae                | CardioEmbolicStroke | MR Egger                  | 8  | 0.7719 | 0.2805 | 2.1247 | 0.6342 | 0.1102  | 0.1896 | 0.5821 | 12.7449 | 0.0473 | -2321.0630 |
| f_Burkholderiaceae                | CardioEmbolicStroke | Weighted median           | 8  | 1.0755 | 0.9060 | 1.2768 | 0.4053 | 0.1102  | 0.1896 | 0.5821 | 12.7449 | 0.0473 | -2321.0630 |
| f_Burkholderiaceae                | CardioEmbolicStroke | Inverse variance weighted | 8  | 1.0381 | 0.8850 | 1.2177 | 0.6461 | 0.1102  | 0.1896 | 0.5821 | 12.7449 | 0.0473 | -2321.0630 |
| f_Burkholderiaceae                | CardioEmbolicStroke | Simple mode               | 8  | 1.0506 | 0.8324 | 1.3262 | 0.6900 | 0.1102  | 0.1896 | 0.5821 | 12.7449 | 0.0473 | -2321.0630 |
| f_Burkholderiaceae                | CardioEmbolicStroke | Weighted mode             | 8  | 1.0619 | 0.8295 | 1.3595 | 0.6481 | 0.1102  | 0.1896 | 0.5821 | 12.7449 | 0.0473 | -2321.0630 |
| f_Burkholderiaceae                | IschemicStroke      | MR Egger                  | 17 | 1.0106 | 0.9712 | 1.0516 | 0.6114 | -0.0071 | 0.0104 | 0.5090 | 19.0191 | 0.2129 | -55.8661   |
| f_Burkholderiaceae                | IschemicStroke      | Weighted median           | 17 | 0.9935 | 0.9668 | 1.0209 | 0.6372 | -0.0071 | 0.0104 | 0.5090 | 19.0191 | 0.2129 | -55.8661   |
| f_Burkholderiaceae                | IschemicStroke      | Inverse variance weighted | 17 | 0.9986 | 0.9795 | 1.0180 | 0.8858 | -0.0071 | 0.0104 | 0.5090 | 19.0191 | 0.2129 | -55.8661   |
| f_Burkholderiaceae                | IschemicStroke      | Simple mode               | 17 | 0.9763 | 0.9227 | 1.0330 | 0.4175 | -0.0071 | 0.0104 | 0.5090 | 19.0191 | 0.2129 | -55.8661   |
| f_Burkholderiaceae                | IschemicStroke      | Weighted mode             | 17 | 0.9848 | 0.9461 | 1.0251 | 0.4649 | -0.0071 | 0.0104 | 0.5090 | 19.0191 | 0.2129 | -55.8661   |
| f_Burkholderiaceae                | LargeArteryStroke   | MR Egger                  | 15 | 1.1043 | 0.9589 | 1.2719 | 0.1918 | -0.0360 | 0.0360 | 0.3361 | 19.4446 | 0.1486 | -7.0426    |
| f_Burkholderiaceae                | LargeArteryStroke   | Weighted median           | 15 | 1.0760 | 0.9814 | 1.1797 | 0.1188 | -0.0360 | 0.0360 | 0.3361 | 19.4446 | 0.1486 | -7.0426    |
| f_Burkholderiaceae                | LargeArteryStroke   | Inverse variance weighted | 15 | 1.0373 | 0.9674 | 1.1123 | 0.3032 | -0.0360 | 0.0360 | 0.3361 | 19.4446 | 0.1486 | -7.0426    |
| f_Burkholderiaceae                | LargeArteryStroke   | Simple mode               | 15 | 1.1413 | 0.9244 | 1.4091 | 0.2393 | -0.0360 | 0.0360 | 0.3361 | 19.4446 | 0.1486 | -7.0426    |
| f_Burkholderiaceae                | LargeArteryStroke   | Weighted mode             | 15 | 0.9194 | 0.7771 | 1.0877 | 0.3436 | -0.0360 | 0.0360 | 0.3361 | 19.4446 | 0.1486 | -7.0426    |
| f_Burkholderiaceae                | SmallVesselStroke   | MR Egger                  | 15 | 1.0269 | 0.9597 | 1.0988 | 0.4560 | 0.0009  | 0.0171 | 0.9587 | 11.9666 | 0.5304 | -36.6923   |
| f_Burkholderiaceae                | SmallVesselStroke   | Weighted median           | 15 | 1.0252 | 0.9764 | 1.0765 | 0.3171 | 0.0009  | 0.0171 | 0.9587 | 11.9666 | 0.5304 | -36.6923   |
| f_Burkholderiaceae                | SmallVesselStroke   | Inverse variance weighted | 15 | 1.0285 | 0.9949 | 1.0632 | 0.0968 | 0.0009  | 0.0171 | 0.9587 | 11.9666 | 0.5304 | -36.6923   |
| f_Burkholderiaceae                | SmallVesselStroke   | Simple mode               | 15 | 1.0551 | 0.9752 | 1.1415 | 0.2034 | 0.0009  | 0.0171 | 0.9587 | 11.9666 | 0.5304 | -36.6923   |
| f_Burkholderiaceae                | SmallVesselStroke   | Weighted mode             | 15 | 1.0277 | 0.9667 | 1.0926 | 0.3955 | 0.0009  | 0.0171 | 0.9587 | 11.9666 | 0.5304 | -36.6923   |
| f_Burkholderiaceae                | Stroke              | MR Egger                  | 18 | 1.0288 | 0.9804 | 1.0796 | 0.2656 | -0.0130 | 0.0114 | 0.2715 | 23.4373 | 0.1355 | -54.8448   |
| f_Burkholderiaceae                | Stroke              | Weighted median           | 18 | 1.0030 | 0.9792 | 1.0275 | 0.8058 | -0.0130 | 0.0114 | 0.2715 | 23.4373 | 0.1355 | -54.8448   |
| f_Burkholderiaceae                | Stroke              | Inverse variance weighted | 18 | 1.0027 | 0.9834 | 1.0224 | 0.7851 | -0.0130 | 0.0114 | 0.2715 | 23.4373 | 0.1355 | -54.8448   |
| f_Burkholderiaceae                | Stroke              | Simple mode               | 18 | 1.0378 | 0.9853 | 1.0930 | 0.1794 | -0.0130 | 0.0114 | 0.2715 | 23.4373 | 0.1355 | -54.8448   |
| f_Burkholderiaceae                | Stroke              | Weighted mode             | 18 | 1.0372 | 0.9875 | 1.0894 | 0.1629 | -0.0130 | 0.0114 | 0.2715 | 23.4373 | 0.1355 | -54.8448   |
| f_Clostridiales_Family_XI_Incerta | CardioEmbolicStroke | MR Egger                  | 10 | 1.0342 | 0.5344 | 2.0018 | 0.9229 | -0.0185 | 0.1011 | 0.8598 | 4.0958  | 0.8484 | -6389.8737 |
| f_Clostridiales_Family_XI_Incerta | CardioEmbolicStroke | Weighted median           | 10 | 0.9838 | 0.8255 | 1.1725 | 0.8554 | -0.0185 | 0.1011 | 0.8598 | 4.0958  | 0.8484 | -6389.8737 |
| f_Clostridiales_Family_XI_Incerta | CardioEmbolicStroke | Inverse variance weighted | 10 | 0.9738 | 0.8536 | 1.1109 | 0.6926 | -0.0185 | 0.1011 | 0.8598 | 4.0958  | 0.8484 | -6389.8737 |
| f_Clostridiales_Family_XI_Incerta | CardioEmbolicStroke | Simple mode               | 10 | 0.9848 | 0.7484 | 1.2959 | 0.9155 | -0.0185 | 0.1011 | 0.8598 | 4.0958  | 0.8484 | -6389.8737 |
| f_Clostridiales_Family_XI_Incerta | CardioEmbolicStroke | Weighted mode             | 10 | 0.9865 | 0.7674 | 1.2681 | 0.9178 | -0.0185 | 0.1011 | 0.8598 | 4.0958  | 0.8484 | -6389.8737 |

|                                                    |                           |    |        |        |        |        |         |        |        |         |        |           |
|----------------------------------------------------|---------------------------|----|--------|--------|--------|--------|---------|--------|--------|---------|--------|-----------|
| f_Clostridiales_Family_XI_IncertaIschemicStroke    | MR Egger                  | 41 | 1.0204 | 0.9965 | 1.0450 | 0.1034 | -0.0041 | 0.0073 | 0.5751 | 48.0664 | 0.1514 | -9.4214   |
| f_Clostridiales_Family_XI_IncertaIschemicStroke    | Weighted median           | 41 | 1.0169 | 0.9965 | 1.0378 | 0.1051 | -0.0041 | 0.0073 | 0.5751 | 48.0664 | 0.1514 | -9.4214   |
| f_Clostridiales_Family_XI_IncertaIschemicStroke    | Inverse variance weighted | 41 | 1.0148 | 1.0007 | 1.0292 | 0.0400 | -0.0041 | 0.0073 | 0.5751 | 48.0664 | 0.1514 | -9.4214   |
| f_Clostridiales_Family_XI_IncertaIschemicStroke    | Simple mode               | 41 | 1.0177 | 0.9686 | 1.0693 | 0.4917 | -0.0041 | 0.0073 | 0.5751 | 48.0664 | 0.1514 | -9.4214   |
| f_Clostridiales_Family_XI_IncertaIschemicStroke    | Weighted mode             | 41 | 1.0177 | 0.9720 | 1.0655 | 0.4590 | -0.0041 | 0.0073 | 0.5751 | 48.0664 | 0.1514 | -9.4214   |
| f_Clostridiales_Family_XI_IncertaLargeArteryStroke | MR Egger                  | 23 | 1.0294 | 0.9336 | 1.1350 | 0.5669 | 0.0205  | 0.0243 | 0.4088 | 18.7205 | 0.6031 | -7.1312   |
| f_Clostridiales_Family_XI_IncertaLargeArteryStroke | Weighted median           | 23 | 1.0728 | 0.9918 | 1.1605 | 0.0792 | 0.0205  | 0.0243 | 0.4088 | 18.7205 | 0.6031 | -7.1312   |
| f_Clostridiales_Family_XI_IncertaLargeArteryStroke | Inverse variance weighted | 23 | 1.0659 | 1.0095 | 1.1256 | 0.0215 | 0.0205  | 0.0243 | 0.4088 | 18.7205 | 0.6031 | -7.1312   |
| f_Clostridiales_Family_XI_IncertaLargeArteryStroke | Simple mode               | 23 | 1.0468 | 0.9115 | 1.2021 | 0.5239 | 0.0205  | 0.0243 | 0.4088 | 18.7205 | 0.6031 | -7.1312   |
| f_Clostridiales_Family_XI_IncertaLargeArteryStroke | Weighted mode             | 23 | 1.0665 | 0.9548 | 1.1912 | 0.2662 | 0.0205  | 0.0243 | 0.4088 | 18.7205 | 0.6031 | -7.1312   |
| f_Clostridiales_Family_XI_IncertaSmallVesselStroke | MR Egger                  | 27 | 1.0211 | 0.9648 | 1.0806 | 0.4776 | -0.0064 | 0.0149 | 0.6711 | 32.3772 | 0.1474 | -10.7656  |
| f_Clostridiales_Family_XI_IncertaSmallVesselStroke | Weighted median           | 27 | 1.0231 | 0.9796 | 1.0684 | 0.3026 | -0.0064 | 0.0149 | 0.6711 | 32.3772 | 0.1474 | -10.7656  |
| f_Clostridiales_Family_XI_IncertaSmallVesselStroke | Inverse variance weighted | 27 | 1.0107 | 0.9792 | 1.0432 | 0.5113 | -0.0064 | 0.0149 | 0.6711 | 32.3772 | 0.1474 | -10.7656  |
| f_Clostridiales_Family_XI_IncertaSmallVesselStroke | Simple mode               | 27 | 0.9796 | 0.9016 | 1.0645 | 0.6315 | -0.0064 | 0.0149 | 0.6711 | 32.3772 | 0.1474 | -10.7656  |
| f_Clostridiales_Family_XI_IncertaSmallVesselStroke | Weighted mode             | 27 | 1.0089 | 0.9504 | 1.0710 | 0.7730 | -0.0064 | 0.0149 | 0.6711 | 32.3772 | 0.1474 | -10.7656  |
| f_Clostridiales_Family_XI_IncertaStroke            | MR Egger                  | 37 | 0.9986 | 0.9732 | 1.0247 | 0.9181 | 0.0058  | 0.0062 | 0.3605 | 28.0272 | 0.7925 | -21.6448  |
| f_Clostridiales_Family_XI_IncertaStroke            | Weighted median           | 37 | 1.0086 | 0.9897 | 1.0278 | 0.3763 | 0.0058  | 0.0062 | 0.3605 | 28.0272 | 0.7925 | -21.6448  |
| f_Clostridiales_Family_XI_IncertaStroke            | Inverse variance weighted | 37 | 1.0090 | 0.9953 | 1.0229 | 0.1985 | 0.0058  | 0.0062 | 0.3605 | 28.0272 | 0.7925 | -21.6448  |
| f_Clostridiales_Family_XI_IncertaStroke            | Simple mode               | 37 | 1.0087 | 0.9600 | 1.0599 | 0.7342 | 0.0058  | 0.0062 | 0.3605 | 28.0272 | 0.7925 | -21.6448  |
| f_Clostridiales_Family_XI_IncertaStroke            | Weighted mode             | 37 | 1.0120 | 0.9697 | 1.0562 | 0.5879 | 0.0058  | 0.0062 | 0.3605 | 28.0272 | 0.7925 | -21.6448  |
| f_Coriobacteriaceae_CardioEmbolicStroke            | MR Egger                  | 13 | 0.9091 | 0.5527 | 1.4951 | 0.7143 | 0.0157  | 0.0701 | 0.8270 | 25.3593 | 0.0081 | -49.9889  |
| f_Coriobacteriaceae_CardioEmbolicStroke            | Weighted median           | 13 | 1.0393 | 0.8486 | 1.2729 | 0.7095 | 0.0157  | 0.0701 | 0.8270 | 25.3593 | 0.0081 | -49.9889  |
| f_Coriobacteriaceae_CardioEmbolicStroke            | Inverse variance weighted | 13 | 0.9580 | 0.7965 | 1.1521 | 0.6482 | 0.0157  | 0.0701 | 0.8270 | 25.3593 | 0.0081 | -49.9889  |
| f_Coriobacteriaceae_CardioEmbolicStroke            | Simple mode               | 13 | 1.1974 | 0.7931 | 1.8078 | 0.4082 | 0.0157  | 0.0701 | 0.8270 | 25.3593 | 0.0081 | -49.9889  |
| f_Coriobacteriaceae_CardioEmbolicStroke            | Weighted mode             | 13 | 1.1111 | 0.7846 | 1.5735 | 0.5637 | 0.0157  | 0.0701 | 0.8270 | 25.3593 | 0.0081 | -49.9889  |
| f_Coriobacteriaceae_IschemicStroke                 | MR Egger                  | 19 | 0.9762 | 0.9306 | 1.0241 | 0.3389 | 0.0049  | 0.0081 | 0.5535 | 17.3744 | 0.4293 | -72.3243  |
| f_Coriobacteriaceae_IschemicStroke                 | Weighted median           | 19 | 0.9894 | 0.9559 | 1.0241 | 0.5452 | 0.0049  | 0.0081 | 0.5535 | 17.3744 | 0.4293 | -72.3243  |
| f_Coriobacteriaceae_IschemicStroke                 | Inverse variance weighted | 19 | 0.9889 | 0.9661 | 1.0122 | 0.3468 | 0.0049  | 0.0081 | 0.5535 | 17.3744 | 0.4293 | -72.3243  |
| f_Coriobacteriaceae_IschemicStroke                 | Simple mode               | 19 | 0.9929 | 0.9337 | 1.0558 | 0.8224 | 0.0049  | 0.0081 | 0.5535 | 17.3744 | 0.4293 | -72.3243  |
| f_Coriobacteriaceae_IschemicStroke                 | Weighted mode             | 19 | 0.9916 | 0.9387 | 1.0476 | 0.7676 | 0.0049  | 0.0081 | 0.5535 | 17.3744 | 0.4293 | -72.3243  |
| f_Coriobacteriaceae_LargeArteryStroke              | MR Egger                  | 17 | 1.0432 | 0.8866 | 1.2275 | 0.6177 | 0.0053  | 0.0268 | 0.8455 | 11.6420 | 0.7059 | -34.5164  |
| f_Coriobacteriaceae_LargeArteryStroke              | Weighted median           | 17 | 1.0366 | 0.9327 | 1.1520 | 0.5047 | 0.0053  | 0.0268 | 0.8455 | 11.6420 | 0.7059 | -34.5164  |
| f_Coriobacteriaceae_LargeArteryStroke              | Inverse variance weighted | 17 | 1.0584 | 0.9790 | 1.1443 | 0.1539 | 0.0053  | 0.0268 | 0.8455 | 11.6420 | 0.7059 | -34.5164  |
| f_Coriobacteriaceae_LargeArteryStroke              | Simple mode               | 17 | 1.0189 | 0.8501 | 1.2212 | 0.8420 | 0.0053  | 0.0268 | 0.8455 | 11.6420 | 0.7059 | -34.5164  |
| f_Coriobacteriaceae_LargeArteryStroke              | Weighted mode             | 17 | 1.0229 | 0.8783 | 1.1912 | 0.7750 | 0.0053  | 0.0268 | 0.8455 | 11.6420 | 0.7059 | -34.5164  |
| f_Coriobacteriaceae_SmallVesselStroke              | MR Egger                  | 17 | 0.9950 | 0.9095 | 1.0885 | 0.9135 | -0.0045 | 0.0149 | 0.7658 | 14.5516 | 0.4842 | -72.9769  |
| f_Coriobacteriaceae_SmallVesselStroke              | Weighted median           | 17 | 0.9891 | 0.9311 | 1.0507 | 0.7230 | -0.0045 | 0.0149 | 0.7658 | 14.5516 | 0.4842 | -72.9769  |
| f_Coriobacteriaceae_SmallVesselStroke              | Inverse variance weighted | 17 | 0.9829 | 0.9413 | 1.0263 | 0.4337 | -0.0045 | 0.0149 | 0.7658 | 14.5516 | 0.4842 | -72.9769  |
| f_Coriobacteriaceae_SmallVesselStroke              | Simple mode               | 17 | 0.9148 | 0.8113 | 1.0315 | 0.1654 | -0.0045 | 0.0149 | 0.7658 | 14.5516 | 0.4842 | -72.9769  |
| f_Coriobacteriaceae_SmallVesselStroke              | Weighted mode             | 17 | 1.0078 | 0.9032 | 1.1244 | 0.8916 | -0.0045 | 0.0149 | 0.7658 | 14.5516 | 0.4842 | -72.9769  |
| f_Coriobacteriaceae_Stroke                         | MR Egger                  | 19 | 1.0136 | 0.9678 | 1.0616 | 0.5736 | -0.0058 | 0.0074 | 0.4419 | 9.7756  | 0.9128 | -161.1239 |
| f_Coriobacteriaceae_Stroke                         | Weighted median           | 19 | 0.9999 | 0.9711 | 1.0296 | 0.9944 | -0.0058 | 0.0074 | 0.4419 | 9.7756  | 0.9128 | -161.1239 |
| f_Coriobacteriaceae_Stroke                         | Inverse variance weighted | 19 | 0.9970 | 0.9762 | 1.0183 | 0.7818 | -0.0058 | 0.0074 | 0.4419 | 9.7756  | 0.9128 | -161.1239 |
| f_Coriobacteriaceae_Stroke                         | Simple mode               | 19 | 1.0008 | 0.9532 | 1.0509 | 0.9737 | -0.0058 | 0.0074 | 0.4419 | 9.7756  | 0.9128 | -161.1239 |
| f_Coriobacteriaceae_Stroke                         | Weighted mode             | 19 | 1.0008 | 0.9565 | 1.0472 | 0.9717 | -0.0058 | 0.0074 | 0.4419 | 9.7756  | 0.9128 | -161.1239 |
| f_Enterobacteriaceae_CardioEmbolicStroke           | MR Egger                  | 13 | 0.8435 | 0.6698 | 1.0622 | 0.1758 | 0.0310  | 0.0488 | 0.5379 | 6.7807  | 0.8166 | -33.4414  |
| f_Enterobacteriaceae_CardioEmbolicStroke           | Weighted median           | 13 | 0.9006 | 0.7960 | 1.0190 | 0.0967 | 0.0310  | 0.0488 | 0.5379 | 6.7807  | 0.8166 | -33.4414  |
| f_Enterobacteriaceae_CardioEmbolicStroke           | Inverse variance weighted | 13 | 0.9038 | 0.8271 | 0.9875 | 0.0252 | 0.0310  | 0.0488 | 0.5379 | 6.7807  | 0.8166 | -33.4414  |
| f_Enterobacteriaceae_CardioEmbolicStroke           | Simple mode               | 13 | 0.9220 | 0.7401 | 1.1485 | 0.4824 | 0.0310  | 0.0488 | 0.5379 | 6.7807  | 0.8166 | -33.4414  |
| f_Enterobacteriaceae_CardioEmbolicStroke           | Weighted mode             | 13 | 0.8394 | 0.6863 | 1.0267 | 0.1142 | 0.0310  | 0.0488 | 0.5379 | 6.7807  | 0.8166 | -33.4414  |
| f_Enterobacteriaceae_IschemicStroke                | MR Egger                  | 16 | 0.9959 | 0.9558 | 1.0378 | 0.8492 | -0.0024 | 0.0097 | 0.8110 | 15.0354 | 0.3757 | -137.5337 |
| f_Enterobacteriaceae_IschemicStroke                | Weighted median           | 16 | 1.0075 | 0.9818 | 1.0339 | 0.5711 | -0.0024 | 0.0097 | 0.8110 | 15.0354 | 0.3757 | -137.5337 |
| f_Enterobacteriaceae_IschemicStroke                | Inverse variance weighted | 16 | 0.9914 | 0.9739 | 1.0093 | 0.3427 | -0.0024 | 0.0097 | 0.8110 | 15.0354 | 0.3757 | -137.5337 |

|                      |                     |                           |    |        |        |        |        |         |        |        |         |        |           |
|----------------------|---------------------|---------------------------|----|--------|--------|--------|--------|---------|--------|--------|---------|--------|-----------|
| f_Enterobacteriaceae | IschemicStroke      | Simple mode               | 16 | 1.0116 | 0.9668 | 1.0585 | 0.6237 | -0.0024 | 0.0097 | 0.8110 | 15.0354 | 0.3757 | -137.5337 |
| f_Enterobacteriaceae | IschemicStroke      | Weighted mode             | 16 | 1.0088 | 0.9774 | 1.0413 | 0.5949 | -0.0024 | 0.0097 | 0.8110 | 15.0354 | 0.3757 | -137.5337 |
| f_Enterobacteriaceae | LargeArteryStroke   | MR Egger                  | 16 | 0.9767 | 0.8514 | 1.1203 | 0.7412 | 0.0088  | 0.0324 | 0.7910 | 15.8938 | 0.3199 | -24.4729  |
| f_Enterobacteriaceae | LargeArteryStroke   | Weighted median           | 16 | 0.9937 | 0.9171 | 1.0768 | 0.8775 | 0.0088  | 0.0324 | 0.7910 | 15.8938 | 0.3199 | -24.4729  |
| f_Enterobacteriaceae | LargeArteryStroke   | Inverse variance weighted | 16 | 0.9933 | 0.9360 | 1.0542 | 0.8259 | 0.0088  | 0.0324 | 0.7910 | 15.8938 | 0.3199 | -24.4729  |
| f_Enterobacteriaceae | LargeArteryStroke   | Simple mode               | 16 | 1.0436 | 0.9121 | 1.1942 | 0.5438 | 0.0088  | 0.0324 | 0.7910 | 15.8938 | 0.3199 | -24.4729  |
| f_Enterobacteriaceae | LargeArteryStroke   | Weighted mode             | 16 | 1.0156 | 0.9164 | 1.1255 | 0.7723 | 0.0088  | 0.0324 | 0.7910 | 15.8938 | 0.3199 | -24.4729  |
| f_Enterobacteriaceae | SmallVesselStroke   | MR Egger                  | 16 | 1.0019 | 0.9224 | 1.0882 | 0.9647 | 0.0026  | 0.0195 | 0.8960 | 18.5451 | 0.1831 | -40.8726  |
| f_Enterobacteriaceae | SmallVesselStroke   | Weighted median           | 16 | 1.0275 | 0.9796 | 1.0777 | 0.2658 | 0.0026  | 0.0195 | 0.8960 | 18.5451 | 0.1831 | -40.8726  |
| f_Enterobacteriaceae | SmallVesselStroke   | Inverse variance weighted | 16 | 1.0069 | 0.9716 | 1.0436 | 0.7043 | 0.0026  | 0.0195 | 0.8960 | 18.5451 | 0.1831 | -40.8726  |
| f_Enterobacteriaceae | SmallVesselStroke   | Simple mode               | 16 | 1.0238 | 0.9485 | 1.1051 | 0.5555 | 0.0026  | 0.0195 | 0.8960 | 18.5451 | 0.1831 | -40.8726  |
| f_Enterobacteriaceae | SmallVesselStroke   | Weighted mode             | 16 | 1.0274 | 0.9678 | 1.0907 | 0.3891 | 0.0026  | 0.0195 | 0.8960 | 18.5451 | 0.1831 | -40.8726  |
| f_Enterobacteriaceae | Stroke              | MR Egger                  | 18 | 0.9874 | 0.9497 | 1.0266 | 0.5313 | 0.0043  | 0.0088 | 0.6370 | 18.5076 | 0.2950 | -154.2303 |
| f_Enterobacteriaceae | Stroke              | Weighted median           | 18 | 1.0018 | 0.9794 | 1.0248 | 0.8747 | 0.0043  | 0.0088 | 0.6370 | 18.5076 | 0.2950 | -154.2303 |
| f_Enterobacteriaceae | Stroke              | Inverse variance weighted | 18 | 0.9959 | 0.9799 | 1.0123 | 0.6237 | 0.0043  | 0.0088 | 0.6370 | 18.5076 | 0.2950 | -154.2303 |
| f_Enterobacteriaceae | Stroke              | Simple mode               | 18 | 0.9937 | 0.9548 | 1.0343 | 0.7618 | 0.0043  | 0.0088 | 0.6370 | 18.5076 | 0.2950 | -154.2303 |
| f_Enterobacteriaceae | Stroke              | Weighted mode             | 18 | 0.9971 | 0.9675 | 1.0276 | 0.8537 | 0.0043  | 0.0088 | 0.6370 | 18.5076 | 0.2950 | -154.2303 |
| f_Eubacteriaceae     | CardioEmbolicStroke | MR Egger                  | 8  | 1.3536 | 1.0131 | 1.8085 | 0.0864 | -0.1046 | 0.0446 | 0.0576 | 12.1887 | 0.0945 | -235.9127 |
| f_Eubacteriaceae     | CardioEmbolicStroke | Weighted median           | 8  | 1.0926 | 0.8766 | 1.3618 | 0.4307 | -0.1046 | 0.0446 | 0.0576 | 12.1887 | 0.0945 | -235.9127 |
| f_Eubacteriaceae     | CardioEmbolicStroke | Inverse variance weighted | 8  | 1.0075 | 0.8297 | 1.2234 | 0.9398 | -0.1046 | 0.0446 | 0.0576 | 12.1887 | 0.0945 | -235.9127 |
| f_Eubacteriaceae     | CardioEmbolicStroke | Simple mode               | 8  | 0.8523 | 0.5637 | 1.2887 | 0.4734 | -0.1046 | 0.0446 | 0.0576 | 12.1887 | 0.0945 | -235.9127 |
| f_Eubacteriaceae     | CardioEmbolicStroke | Weighted mode             | 8  | 1.2205 | 0.9687 | 1.5377 | 0.1348 | -0.1046 | 0.0446 | 0.0576 | 12.1887 | 0.0945 | -235.9127 |
| f_Eubacteriaceae     | IschemicStroke      | MR Egger                  | 16 | 0.9931 | 0.9547 | 1.0330 | 0.7359 | 0.0019  | 0.0081 | 0.8219 | 12.6985 | 0.5504 | -74.4422  |
| f_Eubacteriaceae     | IschemicStroke      | Weighted median           | 16 | 0.9924 | 0.9610 | 1.0248 | 0.6419 | 0.0019  | 0.0081 | 0.8219 | 12.6985 | 0.5504 | -74.4422  |
| f_Eubacteriaceae     | IschemicStroke      | Inverse variance weighted | 16 | 0.9968 | 0.9736 | 1.0205 | 0.7885 | 0.0019  | 0.0081 | 0.8219 | 12.6985 | 0.5504 | -74.4422  |
| f_Eubacteriaceae     | IschemicStroke      | Simple mode               | 16 | 1.0071 | 0.9626 | 1.0537 | 0.7627 | 0.0019  | 0.0081 | 0.8219 | 12.6985 | 0.5504 | -74.4422  |
| f_Eubacteriaceae     | IschemicStroke      | Weighted mode             | 16 | 0.9930 | 0.9562 | 1.0312 | 0.7193 | 0.0019  | 0.0081 | 0.8219 | 12.6985 | 0.5504 | -74.4422  |
| f_Eubacteriaceae     | LargeArteryStroke   | MR Egger                  | 13 | 0.8787 | 0.7442 | 1.0375 | 0.1552 | 0.0359  | 0.0326 | 0.2951 | 17.6061 | 0.1282 | -11.3982  |
| f_Eubacteriaceae     | LargeArteryStroke   | Weighted median           | 13 | 0.9844 | 0.8673 | 1.1172 | 0.8075 | 0.0359  | 0.0326 | 0.2951 | 17.6061 | 0.1282 | -11.3982  |
| f_Eubacteriaceae     | LargeArteryStroke   | Inverse variance weighted | 13 | 0.9471 | 0.8574 | 1.0461 | 0.2841 | 0.0359  | 0.0326 | 0.2951 | 17.6061 | 0.1282 | -11.3982  |
| f_Eubacteriaceae     | LargeArteryStroke   | Simple mode               | 13 | 0.9953 | 0.8161 | 1.2139 | 0.9635 | 0.0359  | 0.0326 | 0.2951 | 17.6061 | 0.1282 | -11.3982  |
| f_Eubacteriaceae     | LargeArteryStroke   | Weighted mode             | 13 | 0.9900 | 0.8567 | 1.1442 | 0.8944 | 0.0359  | 0.0326 | 0.2951 | 17.6061 | 0.1282 | -11.3982  |
| f_Eubacteriaceae     | SmallVesselStroke   | MR Egger                  | 15 | 0.8948 | 0.8342 | 0.9598 | 0.0083 | 0.0300  | 0.0145 | 0.0595 | 10.2384 | 0.7446 | -28.2342  |
| f_Eubacteriaceae     | SmallVesselStroke   | Weighted median           | 15 | 0.9442 | 0.8889 | 1.0029 | 0.0621 | 0.0300  | 0.0145 | 0.0595 | 10.2384 | 0.7446 | -28.2342  |
| f_Eubacteriaceae     | SmallVesselStroke   | Inverse variance weighted | 15 | 0.9492 | 0.9099 | 0.9901 | 0.0155 | 0.0300  | 0.0145 | 0.0595 | 10.2384 | 0.7446 | -28.2342  |
| f_Eubacteriaceae     | SmallVesselStroke   | Simple mode               | 15 | 0.9721 | 0.8661 | 1.0912 | 0.6390 | 0.0300  | 0.0145 | 0.0595 | 10.2384 | 0.7446 | -28.2342  |
| f_Eubacteriaceae     | SmallVesselStroke   | Weighted mode             | 15 | 0.9051 | 0.8335 | 0.9829 | 0.0326 | 0.0300  | 0.0145 | 0.0595 | 10.2384 | 0.7446 | -28.2342  |
| f_Eubacteriaceae     | Stroke              | MR Egger                  | 16 | 1.0051 | 0.9663 | 1.0454 | 0.8039 | 0.0009  | 0.0074 | 0.9068 | 13.1114 | 0.5178 | -85.1722  |
| f_Eubacteriaceae     | Stroke              | Weighted median           | 16 | 0.9911 | 0.9606 | 1.0225 | 0.5738 | 0.0009  | 0.0074 | 0.9068 | 13.1114 | 0.5178 | -85.1722  |
| f_Eubacteriaceae     | Stroke              | Inverse variance weighted | 16 | 1.0071 | 0.9849 | 1.0298 | 0.5356 | 0.0009  | 0.0074 | 0.9068 | 13.1114 | 0.5178 | -85.1722  |
| f_Eubacteriaceae     | Stroke              | Simple mode               | 16 | 1.0052 | 0.9611 | 1.0514 | 0.8225 | 0.0009  | 0.0074 | 0.9068 | 13.1114 | 0.5178 | -85.1722  |
| f_Eubacteriaceae     | Stroke              | Weighted mode             | 16 | 0.9938 | 0.9610 | 1.0276 | 0.7195 | 0.0009  | 0.0074 | 0.9068 | 13.1114 | 0.5178 | -85.1722  |
| f_Lachnospiraceae    | CardioEmbolicStroke | MR Egger                  | 9  | 0.5789 | 0.2828 | 1.1850 | 0.1784 | 0.0827  | 0.0624 | 0.2269 | 6.9193  | 0.5454 | 34.2001   |
| f_Lachnospiraceae    | CardioEmbolicStroke | Weighted median           | 9  | 0.9442 | 0.6636 | 1.3435 | 0.7498 | 0.0827  | 0.0624 | 0.2269 | 6.9193  | 0.5454 | 34.2001   |
| f_Lachnospiraceae    | CardioEmbolicStroke | Inverse variance weighted | 9  | 0.9078 | 0.6967 | 1.1829 | 0.4739 | 0.0827  | 0.0624 | 0.2269 | 6.9193  | 0.5454 | 34.2001   |
| f_Lachnospiraceae    | CardioEmbolicStroke | Simple mode               | 9  | 0.9752 | 0.5802 | 1.6392 | 0.9268 | 0.0827  | 0.0624 | 0.2269 | 6.9193  | 0.5454 | 34.2001   |
| f_Lachnospiraceae    | CardioEmbolicStroke | Weighted mode             | 9  | 0.9572 | 0.6067 | 1.5102 | 0.8556 | 0.0827  | 0.0624 | 0.2269 | 6.9193  | 0.5454 | 34.2001   |
| f_Lachnospiraceae    | IschemicStroke      | MR Egger                  | 12 | 0.9213 | 0.7965 | 1.0656 | 0.2954 | 0.0144  | 0.0135 | 0.3106 | 12.0632 | 0.3589 | 3540.9861 |
| f_Lachnospiraceae    | IschemicStroke      | Weighted median           | 12 | 0.9932 | 0.9194 | 1.0729 | 0.8626 | 0.0144  | 0.0135 | 0.3106 | 12.0632 | 0.3589 | 3540.9861 |
| f_Lachnospiraceae    | IschemicStroke      | Inverse variance weighted | 12 | 0.9907 | 0.9341 | 1.0507 | 0.7554 | 0.0144  | 0.0135 | 0.3106 | 12.0632 | 0.3589 | 3540.9861 |
| f_Lachnospiraceae    | IschemicStroke      | Simple mode               | 12 | 1.0022 | 0.8752 | 1.1478 | 0.9748 | 0.0144  | 0.0135 | 0.3106 | 12.0632 | 0.3589 | 3540.9861 |
| f_Lachnospiraceae    | IschemicStroke      | Weighted mode             | 12 | 0.9881 | 0.8811 | 1.1081 | 0.8420 | 0.0144  | 0.0135 | 0.3106 | 12.0632 | 0.3589 | 3540.9861 |
| f_Lachnospiraceae    | LargeArteryStroke   | MR Egger                  | 9  | 0.7867 | 0.4590 | 1.3481 | 0.4116 | 0.0078  | 0.0468 | 0.8717 | 5.4259  | 0.6081 | 43.1316   |

|                    |                     |                           |    |        |        |        |        |         |        |        |         |        |           |
|--------------------|---------------------|---------------------------|----|--------|--------|--------|--------|---------|--------|--------|---------|--------|-----------|
| f_Lachnospiraceae  | LargeArteryStroke   | Weighted median           | 9  | 0.8549 | 0.6552 | 1.1155 | 0.2481 | 0.0078  | 0.0468 | 0.8717 | 5.4259  | 0.6081 | 43.1316   |
| f_Lachnospiraceae  | LargeArteryStroke   | Inverse variance weighted | 9  | 0.8211 | 0.6731 | 1.0016 | 0.0519 | 0.0078  | 0.0468 | 0.8717 | 5.4259  | 0.6081 | 43.1316   |
| f_Lachnospiraceae  | LargeArteryStroke   | Simple mode               | 9  | 0.9529 | 0.6314 | 1.4381 | 0.8239 | 0.0078  | 0.0468 | 0.8717 | 5.4259  | 0.6081 | 43.1316   |
| f_Lachnospiraceae  | LargeArteryStroke   | Weighted mode             | 9  | 0.9233 | 0.6167 | 1.3825 | 0.7086 | 0.0078  | 0.0468 | 0.8717 | 5.4259  | 0.6081 | 43.1316   |
| f_Lachnospiraceae  | SmallVesselStroke   | MR Egger                  | 9  | 0.9140 | 0.6160 | 1.3562 | 0.6687 | 0.0193  | 0.0343 | 0.5904 | 12.2677 | 0.0921 | 138.7680  |
| f_Lachnospiraceae  | SmallVesselStroke   | Weighted median           | 9  | 1.0190 | 0.8772 | 1.1837 | 0.8058 | 0.0193  | 0.0343 | 0.5904 | 12.2677 | 0.0921 | 138.7680  |
| f_Lachnospiraceae  | SmallVesselStroke   | Inverse variance weighted | 9  | 1.0158 | 0.8840 | 1.1672 | 0.8252 | 0.0193  | 0.0343 | 0.5904 | 12.2677 | 0.0921 | 138.7680  |
| f_Lachnospiraceae  | SmallVesselStroke   | Simple mode               | 9  | 1.0889 | 0.8529 | 1.3903 | 0.5135 | 0.0193  | 0.0343 | 0.5904 | 12.2677 | 0.0921 | 138.7680  |
| f_Lachnospiraceae  | SmallVesselStroke   | Weighted mode             | 9  | 1.0814 | 0.8682 | 1.3469 | 0.5045 | 0.0193  | 0.0343 | 0.5904 | 12.2677 | 0.0921 | 138.7680  |
| f_Lachnospiraceae  | Stroke              | MR Egger                  | 12 | 1.0132 | 0.8928 | 1.1499 | 0.8428 | -0.0015 | 0.0116 | 0.8965 | 10.9518 | 0.3613 | 3614.1592 |
| f_Lachnospiraceae  | Stroke              | Weighted median           | 12 | 0.9852 | 0.9190 | 1.0561 | 0.6734 | -0.0015 | 0.0116 | 0.8965 | 10.9518 | 0.3613 | 3614.1592 |
| f_Lachnospiraceae  | Stroke              | Inverse variance weighted | 12 | 1.0053 | 0.9577 | 1.0552 | 0.8320 | -0.0015 | 0.0116 | 0.8965 | 10.9518 | 0.3613 | 3614.1592 |
| f_Lachnospiraceae  | Stroke              | Simple mode               | 12 | 0.9600 | 0.8598 | 1.0719 | 0.4830 | -0.0015 | 0.0116 | 0.8965 | 10.9518 | 0.3613 | 3614.1592 |
| f_Lachnospiraceae  | Stroke              | Weighted mode             | 12 | 0.9754 | 0.8830 | 1.0775 | 0.6336 | -0.0015 | 0.0116 | 0.8965 | 10.9518 | 0.3613 | 3614.1592 |
| f_Lactobacillaceae | CardioEmbolicStroke | MR Egger                  | 13 | 0.9704 | 0.6965 | 1.3521 | 0.8623 | 0.0055  | 0.0506 | 0.9152 | 6.2618  | 0.8553 | -253.2210 |
| f_Lactobacillaceae | CardioEmbolicStroke | Weighted median           | 13 | 0.9383 | 0.8030 | 1.0964 | 0.4231 | 0.0055  | 0.0506 | 0.9152 | 6.2618  | 0.8553 | -253.2210 |
| f_Lactobacillaceae | CardioEmbolicStroke | Inverse variance weighted | 13 | 0.9873 | 0.8762 | 1.1124 | 0.8332 | 0.0055  | 0.0506 | 0.9152 | 6.2618  | 0.8553 | -253.2210 |
| f_Lactobacillaceae | CardioEmbolicStroke | Simple mode               | 13 | 0.8948 | 0.6841 | 1.1703 | 0.4328 | 0.0055  | 0.0506 | 0.9152 | 6.2618  | 0.8553 | -253.2210 |
| f_Lactobacillaceae | CardioEmbolicStroke | Weighted mode             | 13 | 0.9199 | 0.7160 | 1.1817 | 0.5256 | 0.0055  | 0.0506 | 0.9152 | 6.2618  | 0.8553 | -253.2210 |
| f_Lactobacillaceae | IschemicStroke      | MR Egger                  | 29 | 1.0191 | 0.9901 | 1.0490 | 0.2105 | -0.0077 | 0.0066 | 0.2557 | 22.7030 | 0.7478 | -21.1432  |
| f_Lactobacillaceae | IschemicStroke      | Weighted median           | 29 | 1.0176 | 0.9933 | 1.0425 | 0.1569 | -0.0077 | 0.0066 | 0.2557 | 22.7030 | 0.7478 | -21.1432  |
| f_Lactobacillaceae | IschemicStroke      | Inverse variance weighted | 29 | 1.0049 | 0.9883 | 1.0219 | 0.5622 | -0.0077 | 0.0066 | 0.2557 | 22.7030 | 0.7478 | -21.1432  |
| f_Lactobacillaceae | IschemicStroke      | Simple mode               | 29 | 1.0209 | 0.9763 | 1.0675 | 0.3725 | -0.0077 | 0.0066 | 0.2557 | 22.7030 | 0.7478 | -21.1432  |
| f_Lactobacillaceae | IschemicStroke      | Weighted mode             | 29 | 1.0233 | 0.9846 | 1.0634 | 0.2514 | -0.0077 | 0.0066 | 0.2557 | 22.7030 | 0.7478 | -21.1432  |
| f_Lactobacillaceae | LargeArteryStroke   | MR Egger                  | 20 | 0.9060 | 0.8007 | 1.0252 | 0.1351 | 0.0166  | 0.0244 | 0.5038 | 11.7975 | 0.8575 | -11.2088  |
| f_Lactobacillaceae | LargeArteryStroke   | Weighted median           | 20 | 0.9322 | 0.8489 | 1.0236 | 0.1412 | 0.0166  | 0.0244 | 0.5038 | 11.7975 | 0.8575 | -11.2088  |
| f_Lactobacillaceae | LargeArteryStroke   | Inverse variance weighted | 20 | 0.9397 | 0.8801 | 1.0033 | 0.0628 | 0.0166  | 0.0244 | 0.5038 | 11.7975 | 0.8575 | -11.2088  |
| f_Lactobacillaceae | LargeArteryStroke   | Simple mode               | 20 | 1.0531 | 0.8948 | 1.2393 | 0.5410 | 0.0166  | 0.0244 | 0.5038 | 11.7975 | 0.8575 | -11.2088  |
| f_Lactobacillaceae | LargeArteryStroke   | Weighted mode             | 20 | 0.8818 | 0.7632 | 1.0189 | 0.1043 | 0.0166  | 0.0244 | 0.5038 | 11.7975 | 0.8575 | -11.2088  |
| f_Lactobacillaceae | SmallVesselStroke   | MR Egger                  | 21 | 0.9639 | 0.8906 | 1.0432 | 0.3737 | 0.0069  | 0.0159 | 0.6705 | 27.3914 | 0.0959 | -11.6826  |
| f_Lactobacillaceae | SmallVesselStroke   | Weighted median           | 21 | 0.9916 | 0.9395 | 1.0466 | 0.7597 | 0.0069  | 0.0159 | 0.6705 | 27.3914 | 0.0959 | -11.6826  |
| f_Lactobacillaceae | SmallVesselStroke   | Inverse variance weighted | 21 | 0.9782 | 0.9383 | 1.0198 | 0.2991 | 0.0069  | 0.0159 | 0.6705 | 27.3914 | 0.0959 | -11.6826  |
| f_Lactobacillaceae | SmallVesselStroke   | Simple mode               | 21 | 0.9744 | 0.8716 | 1.0894 | 0.6537 | 0.0069  | 0.0159 | 0.6705 | 27.3914 | 0.0959 | -11.6826  |
| f_Lactobacillaceae | SmallVesselStroke   | Weighted mode             | 21 | 1.0009 | 0.9042 | 1.1081 | 0.9856 | 0.0069  | 0.0159 | 0.6705 | 27.3914 | 0.0959 | -11.6826  |
| f_Lactobacillaceae | Stroke              | MR Egger                  | 27 | 0.9950 | 0.9624 | 1.0287 | 0.7705 | -0.0031 | 0.0066 | 0.6467 | 19.2597 | 0.7845 | -33.4208  |
| f_Lactobacillaceae | Stroke              | Weighted median           | 27 | 0.9895 | 0.9665 | 1.0130 | 0.3771 | -0.0031 | 0.0066 | 0.6467 | 19.2597 | 0.7845 | -33.4208  |
| f_Lactobacillaceae | Stroke              | Inverse variance weighted | 27 | 0.9883 | 0.9718 | 1.0050 | 0.1671 | -0.0031 | 0.0066 | 0.6467 | 19.2597 | 0.7845 | -33.4208  |
| f_Lactobacillaceae | Stroke              | Simple mode               | 27 | 1.0183 | 0.9675 | 1.0717 | 0.4945 | -0.0031 | 0.0066 | 0.6467 | 19.2597 | 0.7845 | -33.4208  |
| f_Lactobacillaceae | Stroke              | Weighted mode             | 27 | 1.0129 | 0.9655 | 1.0625 | 0.6054 | -0.0031 | 0.0066 | 0.6467 | 19.2597 | 0.7845 | -33.4208  |
| f_Leuconostocaceae | CardioEmbolicStroke | MR Egger                  | 8  | 1.1198 | 0.6932 | 1.8090 | 0.6600 | -0.0568 | 0.0931 | 0.5645 | 4.6959  | 0.5834 | -801.7371 |
| f_Leuconostocaceae | CardioEmbolicStroke | Weighted median           | 8  | 0.9882 | 0.8522 | 1.1459 | 0.8750 | -0.0568 | 0.0931 | 0.5645 | 4.6959  | 0.5834 | -801.7371 |
| f_Leuconostocaceae | CardioEmbolicStroke | Inverse variance weighted | 8  | 0.9688 | 0.8642 | 1.0860 | 0.5865 | -0.0568 | 0.0931 | 0.5645 | 4.6959  | 0.5834 | -801.7371 |
| f_Leuconostocaceae | CardioEmbolicStroke | Simple mode               | 8  | 1.0036 | 0.8076 | 1.2473 | 0.9749 | -0.0568 | 0.0931 | 0.5645 | 4.6959  | 0.5834 | -801.7371 |
| f_Leuconostocaceae | CardioEmbolicStroke | Weighted mode             | 8  | 1.0003 | 0.8080 | 1.2382 | 0.9981 | -0.0568 | 0.0931 | 0.5645 | 4.6959  | 0.5834 | -801.7371 |
| f_Leuconostocaceae | IschemicStroke      | MR Egger                  | 13 | 0.9970 | 0.9505 | 1.0459 | 0.9050 | -0.0055 | 0.0113 | 0.6384 | 6.2919  | 0.8532 | -91.9831  |
| f_Leuconostocaceae | IschemicStroke      | Weighted median           | 13 | 0.9870 | 0.9606 | 1.0141 | 0.3437 | -0.0055 | 0.0113 | 0.6384 | 6.2919  | 0.8532 | -91.9831  |
| f_Leuconostocaceae | IschemicStroke      | Inverse variance weighted | 13 | 0.9865 | 0.9663 | 1.0071 | 0.1966 | -0.0055 | 0.0113 | 0.6384 | 6.2919  | 0.8532 | -91.9831  |
| f_Leuconostocaceae | IschemicStroke      | Simple mode               | 13 | 1.0054 | 0.9631 | 1.0495 | 0.8112 | -0.0055 | 0.0113 | 0.6384 | 6.2919  | 0.8532 | -91.9831  |
| f_Leuconostocaceae | IschemicStroke      | Weighted mode             | 13 | 0.9673 | 0.9261 | 1.0103 | 0.1601 | -0.0055 | 0.0113 | 0.6384 | 6.2919  | 0.8532 | -91.9831  |
| f_Leuconostocaceae | LargeArteryStroke   | MR Egger                  | 11 | 0.9735 | 0.8129 | 1.1658 | 0.7770 | -0.0070 | 0.0407 | 0.8666 | 7.5572  | 0.5793 | -31.4932  |
| f_Leuconostocaceae | LargeArteryStroke   | Weighted median           | 11 | 0.9539 | 0.8660 | 1.0507 | 0.3385 | -0.0070 | 0.0407 | 0.8666 | 7.5572  | 0.5793 | -31.4932  |
| f_Leuconostocaceae | LargeArteryStroke   | Inverse variance weighted | 11 | 0.9594 | 0.8935 | 1.0301 | 0.2532 | -0.0070 | 0.0407 | 0.8666 | 7.5572  | 0.5793 | -31.4932  |
| f_Leuconostocaceae | LargeArteryStroke   | Simple mode               | 11 | 0.9053 | 0.7714 | 1.0624 | 0.2508 | -0.0070 | 0.0407 | 0.8666 | 7.5572  | 0.5793 | -31.4932  |

|                         |                     |                           |    |        |        |        |        |         |        |        |         |        |           |
|-------------------------|---------------------|---------------------------|----|--------|--------|--------|--------|---------|--------|--------|---------|--------|-----------|
| f_Leuconostocaceae      | LargeArteryStroke   | Weighted mode             | 11 | 0.9162 | 0.7677 | 1.0935 | 0.3551 | -0.0070 | 0.0407 | 0.8666 | 7.5572  | 0.5793 | -31.4932  |
| f_Leuconostocaceae      | SmallVesselStroke   | MR Egger                  | 12 | 0.9644 | 0.8741 | 1.0640 | 0.4861 | -0.0004 | 0.0224 | 0.9874 | 6.9061  | 0.7343 | -59.1684  |
| f_Leuconostocaceae      | SmallVesselStroke   | Weighted median           | 12 | 0.9535 | 0.9055 | 1.0040 | 0.0706 | -0.0004 | 0.0224 | 0.9874 | 6.9061  | 0.7343 | -59.1684  |
| f_Leuconostocaceae      | SmallVesselStroke   | Inverse variance weighted | 12 | 0.9637 | 0.9268 | 1.0020 | 0.0630 | -0.0004 | 0.0224 | 0.9874 | 6.9061  | 0.7343 | -59.1684  |
| f_Leuconostocaceae      | SmallVesselStroke   | Simple mode               | 12 | 0.9558 | 0.8801 | 1.0379 | 0.3050 | -0.0004 | 0.0224 | 0.9874 | 6.9061  | 0.7343 | -59.1684  |
| f_Leuconostocaceae      | SmallVesselStroke   | Weighted mode             | 12 | 0.9501 | 0.8786 | 1.0275 | 0.2267 | -0.0004 | 0.0224 | 0.9874 | 6.9061  | 0.7343 | -59.1684  |
| f_Leuconostocaceae      | Stroke              | MR Egger                  | 13 | 0.9915 | 0.9469 | 1.0382 | 0.7233 | -0.0015 | 0.0106 | 0.8921 | 11.7191 | 0.3851 | -69.5707  |
| f_Leuconostocaceae      | Stroke              | Weighted median           | 13 | 0.9921 | 0.9670 | 1.0180 | 0.5482 | -0.0015 | 0.0106 | 0.8921 | 11.7191 | 0.3851 | -69.5707  |
| f_Leuconostocaceae      | Stroke              | Inverse variance weighted | 13 | 0.9886 | 0.9708 | 1.0066 | 0.2124 | -0.0015 | 0.0106 | 0.8921 | 11.7191 | 0.3851 | -69.5707  |
| f_Leuconostocaceae      | Stroke              | Simple mode               | 13 | 0.9998 | 0.9600 | 1.0413 | 0.9929 | -0.0015 | 0.0106 | 0.8921 | 11.7191 | 0.3851 | -69.5707  |
| f_Leuconostocaceae      | Stroke              | Weighted mode             | 13 | 0.9911 | 0.9529 | 1.0309 | 0.6646 | -0.0015 | 0.0106 | 0.8921 | 11.7191 | 0.3851 | -69.5707  |
| f_Neisseriaceae         | CardioEmbolicStroke | MR Egger                  | 5  | 0.9317 | 0.4972 | 1.7458 | 0.8394 | -0.0453 | 0.1694 | 0.8067 | 5.8151  | 0.1210 | -119.3896 |
| f_Neisseriaceae         | CardioEmbolicStroke | Weighted median           | 5  | 0.8440 | 0.7101 | 1.0032 | 0.0544 | -0.0453 | 0.1694 | 0.8067 | 5.8151  | 0.1210 | -119.3896 |
| f_Neisseriaceae         | CardioEmbolicStroke | Inverse variance weighted | 5  | 0.8585 | 0.7305 | 1.0089 | 0.0640 | -0.0453 | 0.1694 | 0.8067 | 5.8151  | 0.1210 | -119.3896 |
| f_Neisseriaceae         | CardioEmbolicStroke | Simple mode               | 5  | 0.7715 | 0.5649 | 1.0536 | 0.1781 | -0.0453 | 0.1694 | 0.8067 | 5.8151  | 0.1210 | -119.3896 |
| f_Neisseriaceae         | CardioEmbolicStroke | Weighted mode             | 5  | 0.7652 | 0.5464 | 1.0715 | 0.1943 | -0.0453 | 0.1694 | 0.8067 | 5.8151  | 0.1210 | -119.3896 |
| f_Neisseriaceae         | IschemicStroke      | MR Egger                  | 10 | 0.9854 | 0.9322 | 1.0416 | 0.6178 | 0.0041  | 0.0163 | 0.8086 | 7.9077  | 0.4425 | -107.5158 |
| f_Neisseriaceae         | IschemicStroke      | Weighted median           | 10 | 1.0055 | 0.9760 | 1.0359 | 0.7182 | 0.0041  | 0.0163 | 0.8086 | 7.9077  | 0.4425 | -107.5158 |
| f_Neisseriaceae         | IschemicStroke      | Inverse variance weighted | 10 | 0.9918 | 0.9696 | 1.0145 | 0.4765 | 0.0041  | 0.0163 | 0.8086 | 7.9077  | 0.4425 | -107.5158 |
| f_Neisseriaceae         | IschemicStroke      | Simple mode               | 10 | 1.0062 | 0.9681 | 1.0456 | 0.7620 | 0.0041  | 0.0163 | 0.8086 | 7.9077  | 0.4425 | -107.5158 |
| f_Neisseriaceae         | IschemicStroke      | Weighted mode             | 10 | 1.0065 | 0.9723 | 1.0419 | 0.7236 | 0.0041  | 0.0163 | 0.8086 | 7.9077  | 0.4425 | -107.5158 |
| f_Neisseriaceae         | LargeArteryStroke   | MR Egger                  | 9  | 0.9267 | 0.7314 | 1.1741 | 0.5483 | 0.0632  | 0.0755 | 0.4302 | 9.4793  | 0.2201 | -29.2643  |
| f_Neisseriaceae         | LargeArteryStroke   | Weighted median           | 9  | 0.9754 | 0.8796 | 1.0815 | 0.6359 | 0.0632  | 0.0755 | 0.4302 | 9.4793  | 0.2201 | -29.2643  |
| f_Neisseriaceae         | LargeArteryStroke   | Inverse variance weighted | 9  | 1.0177 | 0.9325 | 1.1106 | 0.6946 | 0.0632  | 0.0755 | 0.4302 | 9.4793  | 0.2201 | -29.2643  |
| f_Neisseriaceae         | LargeArteryStroke   | Simple mode               | 9  | 0.9657 | 0.8291 | 1.1249 | 0.6660 | 0.0632  | 0.0755 | 0.4302 | 9.4793  | 0.2201 | -29.2643  |
| f_Neisseriaceae         | LargeArteryStroke   | Weighted mode             | 9  | 0.9795 | 0.8626 | 1.1122 | 0.7571 | 0.0632  | 0.0755 | 0.4302 | 9.4793  | 0.2201 | -29.2643  |
| f_Neisseriaceae         | SmallVesselStroke   | MR Egger                  | 9  | 0.9597 | 0.8586 | 1.0728 | 0.4931 | 0.0052  | 0.0355 | 0.8875 | 5.3032  | 0.6230 | -70.8008  |
| f_Neisseriaceae         | SmallVesselStroke   | Weighted median           | 9  | 0.9829 | 0.9304 | 1.0383 | 0.5372 | 0.0052  | 0.0355 | 0.8875 | 5.3032  | 0.6230 | -70.8008  |
| f_Neisseriaceae         | SmallVesselStroke   | Inverse variance weighted | 9  | 0.9672 | 0.9273 | 1.0087 | 0.1198 | 0.0052  | 0.0355 | 0.8875 | 5.3032  | 0.6230 | -70.8008  |
| f_Neisseriaceae         | SmallVesselStroke   | Simple mode               | 9  | 0.9832 | 0.9015 | 1.0723 | 0.7117 | 0.0052  | 0.0355 | 0.8875 | 5.3032  | 0.6230 | -70.8008  |
| f_Neisseriaceae         | SmallVesselStroke   | Weighted mode             | 9  | 0.9908 | 0.9180 | 1.0694 | 0.8188 | 0.0052  | 0.0355 | 0.8875 | 5.3032  | 0.6230 | -70.8008  |
| f_Neisseriaceae         | Stroke              | MR Egger                  | 10 | 1.0079 | 0.9544 | 1.0644 | 0.7842 | -0.0117 | 0.0157 | 0.4763 | 10.0785 | 0.2596 | -148.8425 |
| f_Neisseriaceae         | Stroke              | Weighted median           | 10 | 1.0018 | 0.9746 | 1.0299 | 0.8957 | -0.0117 | 0.0157 | 0.4763 | 10.0785 | 0.2596 | -148.8425 |
| f_Neisseriaceae         | Stroke              | Inverse variance weighted | 10 | 0.9889 | 0.9679 | 1.0104 | 0.3108 | -0.0117 | 0.0157 | 0.4763 | 10.0785 | 0.2596 | -148.8425 |
| f_Neisseriaceae         | Stroke              | Simple mode               | 10 | 1.0053 | 0.9631 | 1.0494 | 0.8149 | -0.0117 | 0.0157 | 0.4763 | 10.0785 | 0.2596 | -148.8425 |
| f_Neisseriaceae         | Stroke              | Weighted mode             | 10 | 1.0062 | 0.9724 | 1.0412 | 0.7298 | -0.0117 | 0.0157 | 0.4763 | 10.0785 | 0.2596 | -148.8425 |
| f_Peptostreptococcaceae | CardioEmbolicStroke | MR Egger                  | 11 | 1.1664 | 0.8482 | 1.6039 | 0.3684 | -0.0507 | 0.0473 | 0.3117 | 6.1284  | 0.8044 | -382.8472 |
| f_Peptostreptococcaceae | CardioEmbolicStroke | Weighted median           | 11 | 1.0718 | 0.9085 | 1.2644 | 0.4112 | -0.0507 | 0.0473 | 0.3117 | 6.1284  | 0.8044 | -382.8472 |
| f_Peptostreptococcaceae | CardioEmbolicStroke | Inverse variance weighted | 11 | 0.9933 | 0.8780 | 1.1237 | 0.9149 | -0.0507 | 0.0473 | 0.3117 | 6.1284  | 0.8044 | -382.8472 |
| f_Peptostreptococcaceae | CardioEmbolicStroke | Simple mode               | 11 | 1.0681 | 0.8085 | 1.4111 | 0.6527 | -0.0507 | 0.0473 | 0.3117 | 6.1284  | 0.8044 | -382.8472 |
| f_Peptostreptococcaceae | CardioEmbolicStroke | Weighted mode             | 11 | 1.0743 | 0.8553 | 1.3493 | 0.5516 | -0.0507 | 0.0473 | 0.3117 | 6.1284  | 0.8044 | -382.8472 |
| f_Peptostreptococcaceae | IschemicStroke      | MR Egger                  | 20 | 1.0097 | 0.9749 | 1.0457 | 0.5960 | -0.0037 | 0.0072 | 0.6152 | 19.8959 | 0.3387 | -34.3938  |
| f_Peptostreptococcaceae | IschemicStroke      | Weighted median           | 20 | 1.0078 | 0.9799 | 1.0366 | 0.5863 | -0.0037 | 0.0072 | 0.6152 | 19.8959 | 0.3387 | -34.3938  |
| f_Peptostreptococcaceae | IschemicStroke      | Inverse variance weighted | 20 | 1.0022 | 0.9823 | 1.0226 | 0.8278 | -0.0037 | 0.0072 | 0.6152 | 19.8959 | 0.3387 | -34.3938  |
| f_Peptostreptococcaceae | IschemicStroke      | Simple mode               | 20 | 1.0107 | 0.9625 | 1.0613 | 0.6744 | -0.0037 | 0.0072 | 0.6152 | 19.8959 | 0.3387 | -34.3938  |
| f_Peptostreptococcaceae | IschemicStroke      | Weighted mode             | 20 | 1.0182 | 0.9757 | 1.0627 | 0.4170 | -0.0037 | 0.0072 | 0.6152 | 19.8959 | 0.3387 | -34.3938  |
| f_Peptostreptococcaceae | LargeArteryStroke   | MR Egger                  | 16 | 1.0051 | 0.8587 | 1.1764 | 0.9508 | -0.0356 | 0.0287 | 0.2364 | 19.9243 | 0.1749 | -17.8436  |
| f_Peptostreptococcaceae | LargeArteryStroke   | Weighted median           | 16 | 0.9674 | 0.8699 | 1.0758 | 0.5411 | -0.0356 | 0.0287 | 0.2364 | 19.9243 | 0.1749 | -17.8436  |
| f_Peptostreptococcaceae | LargeArteryStroke   | Inverse variance weighted | 16 | 0.9236 | 0.8489 | 1.0049 | 0.0648 | -0.0356 | 0.0287 | 0.2364 | 19.9243 | 0.1749 | -17.8436  |
| f_Peptostreptococcaceae | LargeArteryStroke   | Simple mode               | 16 | 0.9949 | 0.8431 | 1.1740 | 0.9524 | -0.0356 | 0.0287 | 0.2364 | 19.9243 | 0.1749 | -17.8436  |
| f_Peptostreptococcaceae | LargeArteryStroke   | Weighted mode             | 16 | 0.9792 | 0.8715 | 1.1003 | 0.7292 | -0.0356 | 0.0287 | 0.2364 | 19.9243 | 0.1749 | -17.8436  |
| f_Peptostreptococcaceae | SmallVesselStroke   | MR Egger                  | 18 | 1.0102 | 0.9451 | 1.0799 | 0.7684 | 0.0027  | 0.0131 | 0.8368 | 8.1348  | 0.9448 | -39.8665  |
| f_Peptostreptococcaceae | SmallVesselStroke   | Weighted median           | 18 | 0.9948 | 0.9447 | 1.0476 | 0.8428 | 0.0027  | 0.0131 | 0.8368 | 8.1348  | 0.9448 | -39.8665  |

|                         |                     |                           |    |        |        |        |        |         |        |        |         |        |           |
|-------------------------|---------------------|---------------------------|----|--------|--------|--------|--------|---------|--------|--------|---------|--------|-----------|
| f_Peptostreptococcaceae | SmallVesselStroke   | Inverse variance weighted | 18 | 1.0162 | 0.9791 | 1.0548 | 0.3968 | 0.0027  | 0.0131 | 0.8368 | 8.1348  | 0.9448 | -39.8665  |
| f_Peptostreptococcaceae | SmallVesselStroke   | Simple mode               | 18 | 0.9913 | 0.9125 | 1.0770 | 0.8396 | 0.0027  | 0.0131 | 0.8368 | 8.1348  | 0.9448 | -39.8665  |
| f_Peptostreptococcaceae | SmallVesselStroke   | Weighted mode             | 18 | 0.9872 | 0.9137 | 1.0666 | 0.7478 | 0.0027  | 0.0131 | 0.8368 | 8.1348  | 0.9448 | -39.8665  |
| f_Peptostreptococcaceae | Stroke              | MR Egger                  | 18 | 1.0179 | 0.9793 | 1.0579 | 0.3816 | -0.0067 | 0.0071 | 0.3610 | 18.3574 | 0.3034 | -58.3033  |
| f_Peptostreptococcaceae | Stroke              | Weighted median           | 18 | 1.0049 | 0.9784 | 1.0321 | 0.7202 | -0.0067 | 0.0071 | 0.3610 | 18.3574 | 0.3034 | -58.3033  |
| f_Peptostreptococcaceae | Stroke              | Inverse variance weighted | 18 | 1.0020 | 0.9819 | 1.0224 | 0.8497 | -0.0067 | 0.0071 | 0.3610 | 18.3574 | 0.3034 | -58.3033  |
| f_Peptostreptococcaceae | Stroke              | Simple mode               | 18 | 0.9914 | 0.9441 | 1.0410 | 0.7332 | -0.0067 | 0.0071 | 0.3610 | 18.3574 | 0.3034 | -58.3033  |
| f_Peptostreptococcaceae | Stroke              | Weighted mode             | 18 | 1.0180 | 0.9788 | 1.0587 | 0.3853 | -0.0067 | 0.0071 | 0.3610 | 18.3574 | 0.3034 | -58.3033  |
| f_Porphyrimonadaceae    | CardioEmbolicStroke | MR Egger                  | 9  | 0.9581 | 0.2547 | 3.6039 | 0.9513 | 0.0115  | 0.1014 | 0.9125 | 1.0784  | 0.9935 | 98.1115   |
| f_Porphyrimonadaceae    | CardioEmbolicStroke | Weighted median           | 9  | 1.0021 | 0.7136 | 1.4071 | 0.9906 | 0.0115  | 0.1014 | 0.9125 | 1.0784  | 0.9935 | 98.1115   |
| f_Porphyrimonadaceae    | CardioEmbolicStroke | Inverse variance weighted | 9  | 1.0332 | 0.7949 | 1.3430 | 0.8070 | 0.0115  | 0.1014 | 0.9125 | 1.0784  | 0.9935 | 98.1115   |
| f_Porphyrimonadaceae    | CardioEmbolicStroke | Simple mode               | 9  | 0.9866 | 0.6018 | 1.6174 | 0.9586 | 0.0115  | 0.1014 | 0.9125 | 1.0784  | 0.9935 | 98.1115   |
| f_Porphyrimonadaceae    | CardioEmbolicStroke | Weighted mode             | 9  | 0.9881 | 0.6100 | 1.6007 | 0.9625 | 0.0115  | 0.1014 | 0.9125 | 1.0784  | 0.9935 | 98.1115   |
| f_Porphyrimonadaceae    | IschemicStroke      | MR Egger                  | 21 | 0.9910 | 0.9326 | 1.0530 | 0.7729 | -0.0027 | 0.0074 | 0.7154 | 12.7313 | 0.8520 | -106.8500 |
| f_Porphyrimonadaceae    | IschemicStroke      | Weighted median           | 21 | 0.9696 | 0.9224 | 1.0191 | 0.2240 | -0.0027 | 0.0074 | 0.7154 | 12.7313 | 0.8520 | -106.8500 |
| f_Porphyrimonadaceae    | IschemicStroke      | Inverse variance weighted | 21 | 0.9818 | 0.9474 | 1.0175 | 0.3144 | -0.0027 | 0.0074 | 0.7154 | 12.7313 | 0.8520 | -106.8500 |
| f_Porphyrimonadaceae    | IschemicStroke      | Simple mode               | 21 | 0.9633 | 0.8876 | 1.0455 | 0.3811 | -0.0027 | 0.0074 | 0.7154 | 12.7313 | 0.8520 | -106.8500 |
| f_Porphyrimonadaceae    | IschemicStroke      | Weighted mode             | 21 | 0.9697 | 0.9067 | 1.0370 | 0.3789 | -0.0027 | 0.0074 | 0.7154 | 12.7313 | 0.8520 | -106.8500 |
| f_Porphyrimonadaceae    | LargeArteryStroke   | MR Egger                  | 13 | 1.0779 | 0.7791 | 1.4914 | 0.6592 | -0.0199 | 0.0319 | 0.5440 | 13.1827 | 0.2816 | -431.2716 |
| f_Porphyrimonadaceae    | LargeArteryStroke   | Weighted median           | 13 | 1.0203 | 0.8295 | 1.2550 | 0.8491 | -0.0199 | 0.0319 | 0.5440 | 13.1827 | 0.2816 | -431.2716 |
| f_Porphyrimonadaceae    | LargeArteryStroke   | Inverse variance weighted | 13 | 0.9853 | 0.8413 | 1.1540 | 0.8545 | -0.0199 | 0.0319 | 0.5440 | 13.1827 | 0.2816 | -431.2716 |
| f_Porphyrimonadaceae    | LargeArteryStroke   | Simple mode               | 13 | 1.1290 | 0.8191 | 1.5562 | 0.4728 | -0.0199 | 0.0319 | 0.5440 | 13.1827 | 0.2816 | -431.2716 |
| f_Porphyrimonadaceae    | LargeArteryStroke   | Weighted mode             | 13 | 1.0469 | 0.7788 | 1.4072 | 0.7666 | -0.0199 | 0.0319 | 0.5440 | 13.1827 | 0.2816 | -431.2716 |
| f_Porphyrimonadaceae    | SmallVesselStroke   | MR Egger                  | 16 | 1.1172 | 0.9744 | 1.2808 | 0.1345 | -0.0203 | 0.0146 | 0.1861 | 8.1653  | 0.9170 | -99.2482  |
| f_Porphyrimonadaceae    | SmallVesselStroke   | Weighted median           | 16 | 1.0785 | 0.9776 | 1.1897 | 0.1315 | -0.0203 | 0.0146 | 0.1861 | 8.1653  | 0.9170 | -99.2482  |
| f_Porphyrimonadaceae    | SmallVesselStroke   | Inverse variance weighted | 16 | 1.0299 | 0.9559 | 1.1097 | 0.4380 | -0.0203 | 0.0146 | 0.1861 | 8.1653  | 0.9170 | -99.2482  |
| f_Porphyrimonadaceae    | SmallVesselStroke   | Simple mode               | 16 | 1.0436 | 0.8929 | 1.2198 | 0.5993 | -0.0203 | 0.0146 | 0.1861 | 8.1653  | 0.9170 | -99.2482  |
| f_Porphyrimonadaceae    | SmallVesselStroke   | Weighted mode             | 16 | 1.0755 | 0.9395 | 1.2312 | 0.3079 | -0.0203 | 0.0146 | 0.1861 | 8.1653  | 0.9170 | -99.2482  |
| f_Porphyrimonadaceae    | Stroke              | MR Egger                  | 22 | 0.9863 | 0.9131 | 1.0654 | 0.7303 | -0.0037 | 0.0078 | 0.6363 | 20.0636 | 0.4540 | -190.0321 |
| f_Porphyrimonadaceae    | Stroke              | Weighted median           | 22 | 0.9716 | 0.9251 | 1.0204 | 0.2495 | -0.0037 | 0.0078 | 0.6363 | 20.0636 | 0.4540 | -190.0321 |
| f_Porphyrimonadaceae    | Stroke              | Inverse variance weighted | 22 | 0.9700 | 0.9359 | 1.0053 | 0.0945 | -0.0037 | 0.0078 | 0.6363 | 20.0636 | 0.4540 | -190.0321 |
| f_Porphyrimonadaceae    | Stroke              | Simple mode               | 22 | 0.9673 | 0.8856 | 1.0566 | 0.4691 | -0.0037 | 0.0078 | 0.6363 | 20.0636 | 0.4540 | -190.0321 |
| f_Porphyrimonadaceae    | Stroke              | Weighted mode             | 22 | 0.9612 | 0.8905 | 1.0375 | 0.3217 | -0.0037 | 0.0078 | 0.6363 | 20.0636 | 0.4540 | -190.0321 |
| f_Prevotellaceae        | CardioEmbolicStroke | MR Egger                  | 14 | 1.0447 | 0.8282 | 1.3179 | 0.7183 | -0.0233 | 0.0641 | 0.7224 | 13.5436 | 0.3308 | -19.0463  |
| f_Prevotellaceae        | CardioEmbolicStroke | Weighted median           | 14 | 1.0040 | 0.9164 | 1.1001 | 0.9313 | -0.0233 | 0.0641 | 0.7224 | 13.5436 | 0.3308 | -19.0463  |
| f_Prevotellaceae        | CardioEmbolicStroke | Inverse variance weighted | 14 | 1.0026 | 0.9377 | 1.0720 | 0.9386 | -0.0233 | 0.0641 | 0.7224 | 13.5436 | 0.3308 | -19.0463  |
| f_Prevotellaceae        | CardioEmbolicStroke | Simple mode               | 14 | 0.9977 | 0.8439 | 1.1795 | 0.9789 | -0.0233 | 0.0641 | 0.7224 | 13.5436 | 0.3308 | -19.0463  |
| f_Prevotellaceae        | CardioEmbolicStroke | Weighted mode             | 14 | 0.9889 | 0.8494 | 1.1513 | 0.8878 | -0.0233 | 0.0641 | 0.7224 | 13.5436 | 0.3308 | -19.0463  |
| f_Prevotellaceae        | IschemicStroke      | MR Egger                  | 16 | 1.0070 | 0.9622 | 1.0538 | 0.7684 | -0.0034 | 0.0129 | 0.7951 | 8.2918  | 0.8736 | -93.0753  |
| f_Prevotellaceae        | IschemicStroke      | Weighted median           | 16 | 0.9992 | 0.9796 | 1.0192 | 0.9375 | -0.0034 | 0.0129 | 0.7951 | 8.2918  | 0.8736 | -93.0753  |
| f_Prevotellaceae        | IschemicStroke      | Inverse variance weighted | 16 | 1.0011 | 0.9867 | 1.0158 | 0.8771 | -0.0034 | 0.0129 | 0.7951 | 8.2918  | 0.8736 | -93.0753  |
| f_Prevotellaceae        | IschemicStroke      | Simple mode               | 16 | 0.9909 | 0.9597 | 1.0232 | 0.5862 | -0.0034 | 0.0129 | 0.7951 | 8.2918  | 0.8736 | -93.0753  |
| f_Prevotellaceae        | IschemicStroke      | Weighted mode             | 16 | 0.9933 | 0.9675 | 1.0199 | 0.6269 | -0.0034 | 0.0129 | 0.7951 | 8.2918  | 0.8736 | -93.0753  |
| f_Prevotellaceae        | LargeArteryStroke   | MR Egger                  | 14 | 1.2386 | 1.0326 | 1.4858 | 0.0398 | -0.1364 | 0.0503 | 0.0188 | 23.9264 | 0.0318 | -19.6393  |
| f_Prevotellaceae        | LargeArteryStroke   | Weighted median           | 14 | 0.9530 | 0.8885 | 1.0221 | 0.1778 | -0.1364 | 0.0503 | 0.0188 | 23.9264 | 0.0318 | -19.6393  |
| f_Prevotellaceae        | LargeArteryStroke   | Inverse variance weighted | 14 | 0.9740 | 0.9115 | 1.0408 | 0.4367 | -0.1364 | 0.0503 | 0.0188 | 23.9264 | 0.0318 | -19.6393  |
| f_Prevotellaceae        | LargeArteryStroke   | Simple mode               | 14 | 0.9579 | 0.8533 | 1.0752 | 0.4783 | -0.1364 | 0.0503 | 0.0188 | 23.9264 | 0.0318 | -19.6393  |
| f_Prevotellaceae        | LargeArteryStroke   | Weighted mode             | 14 | 0.9579 | 0.8613 | 1.0652 | 0.4413 | -0.1364 | 0.0503 | 0.0188 | 23.9264 | 0.0318 | -19.6393  |
| f_Prevotellaceae        | SmallVesselStroke   | MR Egger                  | 14 | 1.0070 | 0.9196 | 1.1027 | 0.8825 | -0.0028 | 0.0251 | 0.9131 | 5.9259  | 0.9198 | -98.4826  |
| f_Prevotellaceae        | SmallVesselStroke   | Weighted median           | 14 | 1.0037 | 0.9688 | 1.0398 | 0.8381 | -0.0028 | 0.0251 | 0.9131 | 5.9259  | 0.9198 | -98.4826  |
| f_Prevotellaceae        | SmallVesselStroke   | Inverse variance weighted | 14 | 1.0021 | 0.9753 | 1.0296 | 0.8813 | -0.0028 | 0.0251 | 0.9131 | 5.9259  | 0.9198 | -98.4826  |
| f_Prevotellaceae        | SmallVesselStroke   | Simple mode               | 14 | 1.0089 | 0.9554 | 1.0655 | 0.7550 | -0.0028 | 0.0251 | 0.9131 | 5.9259  | 0.9198 | -98.4826  |
| f_Prevotellaceae        | SmallVesselStroke   | Weighted mode             | 14 | 1.0055 | 0.9541 | 1.0596 | 0.8417 | -0.0028 | 0.0251 | 0.9131 | 5.9259  | 0.9198 | -98.4826  |

|                     |                     |                           |    |        |        |        |        |         |        |        |         |        |           |
|---------------------|---------------------|---------------------------|----|--------|--------|--------|--------|---------|--------|--------|---------|--------|-----------|
| f_Prevotellaceae    | Stroke              | MR Egger                  | 17 | 0.9986 | 0.9618 | 1.0369 | 0.9444 | 0.0021  | 0.0107 | 0.8484 | 11.6916 | 0.7022 | -78.7110  |
| f_Prevotellaceae    | Stroke              | Weighted median           | 17 | 0.9965 | 0.9798 | 1.0135 | 0.6865 | 0.0021  | 0.0107 | 0.8484 | 11.6916 | 0.7022 | -78.7110  |
| f_Prevotellaceae    | Stroke              | Inverse variance weighted | 17 | 1.0022 | 0.9900 | 1.0145 | 0.7278 | 0.0021  | 0.0107 | 0.8484 | 11.6916 | 0.7022 | -78.7110  |
| f_Prevotellaceae    | Stroke              | Simple mode               | 17 | 1.0127 | 0.9842 | 1.0420 | 0.3980 | 0.0021  | 0.0107 | 0.8484 | 11.6916 | 0.7022 | -78.7110  |
| f_Prevotellaceae    | Stroke              | Weighted mode             | 17 | 1.0077 | 0.9829 | 1.0331 | 0.5557 | 0.0021  | 0.0107 | 0.8484 | 11.6916 | 0.7022 | -78.7110  |
| f_Staphylococcaceae | CardioEmbolicStroke | MR Egger                  | 8  | 0.8376 | 0.6592 | 1.0643 | 0.1973 | 0.0745  | 0.0474 | 0.1672 | 3.4608  | 0.8394 | -149.1817 |
| f_Staphylococcaceae | CardioEmbolicStroke | Weighted median           | 8  | 0.9733 | 0.8365 | 1.1323 | 0.7257 | 0.0745  | 0.0474 | 0.1672 | 3.4608  | 0.8394 | -149.1817 |
| f_Staphylococcaceae | CardioEmbolicStroke | Inverse variance weighted | 8  | 0.9901 | 0.8802 | 1.1138 | 0.8687 | 0.0745  | 0.0474 | 0.1672 | 3.4608  | 0.8394 | -149.1817 |
| f_Staphylococcaceae | CardioEmbolicStroke | Simple mode               | 8  | 0.9771 | 0.7423 | 1.2860 | 0.8731 | 0.0745  | 0.0474 | 0.1672 | 3.4608  | 0.8394 | -149.1817 |
| f_Staphylococcaceae | CardioEmbolicStroke | Weighted mode             | 8  | 0.9274 | 0.7720 | 1.1141 | 0.4471 | 0.0745  | 0.0474 | 0.1672 | 3.4608  | 0.8394 | -149.1817 |
| f_Staphylococcaceae | IschemicStroke      | MR Egger                  | 12 | 1.0246 | 0.9744 | 1.0774 | 0.3653 | -0.0035 | 0.0113 | 0.7662 | 13.4522 | 0.1995 | -42.9084  |
| f_Staphylococcaceae | IschemicStroke      | Weighted median           | 12 | 1.0095 | 0.9759 | 1.0443 | 0.5827 | -0.0035 | 0.0113 | 0.7662 | 13.4522 | 0.1995 | -42.9084  |
| f_Staphylococcaceae | IschemicStroke      | Inverse variance weighted | 12 | 1.0178 | 0.9921 | 1.0442 | 0.1759 | -0.0035 | 0.0113 | 0.7662 | 13.4522 | 0.1995 | -42.9084  |
| f_Staphylococcaceae | IschemicStroke      | Simple mode               | 12 | 0.9954 | 0.9427 | 1.0511 | 0.8715 | -0.0035 | 0.0113 | 0.7662 | 13.4522 | 0.1995 | -42.9084  |
| f_Staphylococcaceae | IschemicStroke      | Weighted mode             | 12 | 1.0044 | 0.9643 | 1.0462 | 0.8364 | -0.0035 | 0.0113 | 0.7662 | 13.4522 | 0.1995 | -42.9084  |
| f_Staphylococcaceae | LargeArteryStroke   | MR Egger                  | 9  | 0.8764 | 0.7328 | 1.0481 | 0.1916 | 0.0328  | 0.0361 | 0.3943 | 7.2569  | 0.4026 | -65.4222  |
| f_Staphylococcaceae | LargeArteryStroke   | Weighted median           | 9  | 0.9316 | 0.8286 | 1.0473 | 0.2353 | 0.0328  | 0.0361 | 0.3943 | 7.2569  | 0.4026 | -65.4222  |
| f_Staphylococcaceae | LargeArteryStroke   | Inverse variance weighted | 9  | 0.9423 | 0.8651 | 1.0264 | 0.1732 | 0.0328  | 0.0361 | 0.3943 | 7.2569  | 0.4026 | -65.4222  |
| f_Staphylococcaceae | LargeArteryStroke   | Simple mode               | 9  | 0.9370 | 0.7729 | 1.1359 | 0.5261 | 0.0328  | 0.0361 | 0.3943 | 7.2569  | 0.4026 | -65.4222  |
| f_Staphylococcaceae | LargeArteryStroke   | Weighted mode             | 9  | 0.9296 | 0.8013 | 1.0784 | 0.3636 | 0.0328  | 0.0361 | 0.3943 | 7.2569  | 0.4026 | -65.4222  |
| f_Staphylococcaceae | SmallVesselStroke   | MR Egger                  | 10 | 1.1082 | 1.0057 | 1.2212 | 0.0718 | -0.0220 | 0.0203 | 0.3094 | 10.8341 | 0.2873 | -41.3099  |
| f_Staphylococcaceae | SmallVesselStroke   | Weighted median           | 10 | 1.0616 | 0.9943 | 1.1335 | 0.0734 | -0.0220 | 0.0203 | 0.3094 | 10.8341 | 0.2873 | -41.3099  |
| f_Staphylococcaceae | SmallVesselStroke   | Inverse variance weighted | 10 | 1.0581 | 1.0065 | 1.1123 | 0.0267 | -0.0220 | 0.0203 | 0.3094 | 10.8341 | 0.2873 | -41.3099  |
| f_Staphylococcaceae | SmallVesselStroke   | Simple mode               | 10 | 0.9762 | 0.8680 | 1.0978 | 0.6965 | -0.0220 | 0.0203 | 0.3094 | 10.8341 | 0.2873 | -41.3099  |
| f_Staphylococcaceae | SmallVesselStroke   | Weighted mode             | 10 | 1.0847 | 0.9952 | 1.1823 | 0.0972 | -0.0220 | 0.0203 | 0.3094 | 10.8341 | 0.2873 | -41.3099  |
| f_Staphylococcaceae | Stroke              | MR Egger                  | 12 | 1.0158 | 0.9733 | 1.0602 | 0.4886 | -0.0034 | 0.0090 | 0.7112 | 9.5951  | 0.4767 | -56.2280  |
| f_Staphylococcaceae | Stroke              | Weighted median           | 12 | 1.0064 | 0.9763 | 1.0375 | 0.6794 | -0.0034 | 0.0090 | 0.7112 | 9.5951  | 0.4767 | -56.2280  |
| f_Staphylococcaceae | Stroke              | Inverse variance weighted | 12 | 1.0085 | 0.9871 | 1.0305 | 0.4386 | -0.0034 | 0.0090 | 0.7112 | 9.5951  | 0.4767 | -56.2280  |
| f_Staphylococcaceae | Stroke              | Simple mode               | 12 | 1.0071 | 0.9605 | 1.0559 | 0.7761 | -0.0034 | 0.0090 | 0.7112 | 9.5951  | 0.4767 | -56.2280  |
| f_Staphylococcaceae | Stroke              | Weighted mode             | 12 | 1.0060 | 0.9703 | 1.0431 | 0.7508 | -0.0034 | 0.0090 | 0.7112 | 9.5951  | 0.4767 | -56.2280  |
| f_Streptococcaceae  | CardioEmbolicStroke | MR Egger                  | 14 | 0.8839 | 0.5915 | 1.3207 | 0.5581 | 0.0255  | 0.0530 | 0.6385 | 9.6712  | 0.6448 | -293.3170 |
| f_Streptococcaceae  | CardioEmbolicStroke | Weighted median           | 14 | 0.9419 | 0.7835 | 1.1323 | 0.5240 | 0.0255  | 0.0530 | 0.6385 | 9.6712  | 0.6448 | -293.3170 |
| f_Streptococcaceae  | CardioEmbolicStroke | Inverse variance weighted | 14 | 0.9701 | 0.8479 | 1.1098 | 0.6582 | 0.0255  | 0.0530 | 0.6385 | 9.6712  | 0.6448 | -293.3170 |
| f_Streptococcaceae  | CardioEmbolicStroke | Simple mode               | 14 | 0.9536 | 0.6980 | 1.3027 | 0.7699 | 0.0255  | 0.0530 | 0.6385 | 9.6712  | 0.6448 | -293.3170 |
| f_Streptococcaceae  | CardioEmbolicStroke | Weighted mode             | 14 | 0.9481 | 0.7008 | 1.2827 | 0.7351 | 0.0255  | 0.0530 | 0.6385 | 9.6712  | 0.6448 | -293.3170 |
| f_Streptococcaceae  | IschemicStroke      | MR Egger                  | 23 | 1.0577 | 0.9918 | 1.1281 | 0.1024 | -0.0149 | 0.0095 | 0.1316 | 14.8370 | 0.8691 | -113.1172 |
| f_Streptococcaceae  | IschemicStroke      | Weighted median           | 23 | 0.9994 | 0.9642 | 1.0358 | 0.9732 | -0.0149 | 0.0095 | 0.1316 | 14.8370 | 0.8691 | -113.1172 |
| f_Streptococcaceae  | IschemicStroke      | Inverse variance weighted | 23 | 1.0089 | 0.9833 | 1.0351 | 0.4999 | -0.0149 | 0.0095 | 0.1316 | 14.8370 | 0.8691 | -113.1172 |
| f_Streptococcaceae  | IschemicStroke      | Simple mode               | 23 | 0.9991 | 0.9366 | 1.0657 | 0.9773 | -0.0149 | 0.0095 | 0.1316 | 14.8370 | 0.8691 | -113.1172 |
| f_Streptococcaceae  | IschemicStroke      | Weighted mode             | 23 | 0.9922 | 0.9304 | 1.0580 | 0.8125 | -0.0149 | 0.0095 | 0.1316 | 14.8370 | 0.8691 | -113.1172 |
| f_Streptococcaceae  | LargeArteryStroke   | MR Egger                  | 16 | 0.6810 | 0.5194 | 0.8928 | 0.0147 | 0.1023  | 0.0372 | 0.0156 | 15.4229 | 0.4214 | -114.1724 |
| f_Streptococcaceae  | LargeArteryStroke   | Weighted median           | 16 | 0.9653 | 0.8450 | 1.1028 | 0.6035 | 0.1023  | 0.0372 | 0.0156 | 15.4229 | 0.4214 | -114.1724 |
| f_Streptococcaceae  | LargeArteryStroke   | Inverse variance weighted | 16 | 0.9724 | 0.8838 | 1.0700 | 0.5663 | 0.1023  | 0.0372 | 0.0156 | 15.4229 | 0.4214 | -114.1724 |
| f_Streptococcaceae  | LargeArteryStroke   | Simple mode               | 16 | 0.8928 | 0.6875 | 1.1595 | 0.4086 | 0.1023  | 0.0372 | 0.0156 | 15.4229 | 0.4214 | -114.1724 |
| f_Streptococcaceae  | LargeArteryStroke   | Weighted mode             | 16 | 0.8481 | 0.6738 | 1.0676 | 0.1809 | 0.1023  | 0.0372 | 0.0156 | 15.4229 | 0.4214 | -114.1724 |
| f_Streptococcaceae  | SmallVesselStroke   | MR Egger                  | 18 | 1.1535 | 1.0112 | 1.3157 | 0.0494 | -0.0365 | 0.0187 | 0.0690 | 18.0360 | 0.3866 | -88.1787  |
| f_Streptococcaceae  | SmallVesselStroke   | Weighted median           | 18 | 1.0477 | 0.9784 | 1.1218 | 0.1819 | -0.0365 | 0.0187 | 0.0690 | 18.0360 | 0.3866 | -88.1787  |
| f_Streptococcaceae  | SmallVesselStroke   | Inverse variance weighted | 18 | 1.0220 | 0.9705 | 1.0762 | 0.4092 | -0.0365 | 0.0187 | 0.0690 | 18.0360 | 0.3866 | -88.1787  |
| f_Streptococcaceae  | SmallVesselStroke   | Simple mode               | 18 | 1.0797 | 0.9375 | 1.2436 | 0.3021 | -0.0365 | 0.0187 | 0.0690 | 18.0360 | 0.3866 | -88.1787  |
| f_Streptococcaceae  | SmallVesselStroke   | Weighted mode             | 18 | 1.0873 | 0.9588 | 1.2331 | 0.2094 | -0.0365 | 0.0187 | 0.0690 | 18.0360 | 0.3866 | -88.1787  |
| f_Streptococcaceae  | Stroke              | MR Egger                  | 20 | 1.0694 | 0.9994 | 1.1442 | 0.0678 | -0.0198 | 0.0094 | 0.0496 | 17.0343 | 0.5875 | -254.0027 |
| f_Streptococcaceae  | Stroke              | Weighted median           | 20 | 0.9924 | 0.9604 | 1.0254 | 0.6460 | -0.0198 | 0.0094 | 0.0496 | 17.0343 | 0.5875 | -254.0027 |
| f_Streptococcaceae  | Stroke              | Inverse variance weighted | 20 | 0.9990 | 0.9757 | 1.0228 | 0.9323 | -0.0198 | 0.0094 | 0.0496 | 17.0343 | 0.5875 | -254.0027 |

|                    |                     |                           |    |        |        |        |        |         |        |        |         |        |            |
|--------------------|---------------------|---------------------------|----|--------|--------|--------|--------|---------|--------|--------|---------|--------|------------|
| f_Streptococcaceae | Stroke              | Simple mode               | 20 | 0.9828 | 0.9170 | 1.0532 | 0.6282 | -0.0198 | 0.0094 | 0.0496 | 17.0343 | 0.5875 | -254.0027  |
| f_Streptococcaceae | Stroke              | Weighted mode             | 20 | 0.9846 | 0.9211 | 1.0524 | 0.6525 | -0.0198 | 0.0094 | 0.0496 | 17.0343 | 0.5875 | -254.0027  |
| f_Sutterellaceae   | CardioEmbolicStroke | MR Egger                  | 9  | 1.3159 | 0.8831 | 1.9607 | 0.2193 | -0.1064 | 0.0925 | 0.2875 | 3.3660  | 0.9093 | -126.5576  |
| f_Sutterellaceae   | CardioEmbolicStroke | Weighted median           | 9  | 1.0423 | 0.9321 | 1.1655 | 0.4675 | -0.1064 | 0.0925 | 0.2875 | 3.3660  | 0.9093 | -126.5576  |
| f_Sutterellaceae   | CardioEmbolicStroke | Inverse variance weighted | 9  | 1.0472 | 0.9590 | 1.1435 | 0.3045 | -0.1064 | 0.0925 | 0.2875 | 3.3660  | 0.9093 | -126.5576  |
| f_Sutterellaceae   | CardioEmbolicStroke | Simple mode               | 9  | 1.0180 | 0.8636 | 1.2000 | 0.8369 | -0.1064 | 0.0925 | 0.2875 | 3.3660  | 0.9093 | -126.5576  |
| f_Sutterellaceae   | CardioEmbolicStroke | Weighted mode             | 9  | 1.0286 | 0.8804 | 1.2018 | 0.7315 | -0.1064 | 0.0925 | 0.2875 | 3.3660  | 0.9093 | -126.5576  |
| f_Sutterellaceae   | IschemicStroke      | MR Egger                  | 19 | 1.0017 | 0.9677 | 1.0370 | 0.9226 | -0.0062 | 0.0101 | 0.5452 | 12.8327 | 0.7473 | -39.2911   |
| f_Sutterellaceae   | IschemicStroke      | Weighted median           | 19 | 0.9975 | 0.9774 | 1.0181 | 0.8124 | -0.0062 | 0.0101 | 0.5452 | 12.8327 | 0.7473 | -39.2911   |
| f_Sutterellaceae   | IschemicStroke      | Inverse variance weighted | 19 | 0.9920 | 0.9772 | 1.0069 | 0.2896 | -0.0062 | 0.0101 | 0.5452 | 12.8327 | 0.7473 | -39.2911   |
| f_Sutterellaceae   | IschemicStroke      | Simple mode               | 19 | 0.9993 | 0.9652 | 1.0345 | 0.9678 | -0.0062 | 0.0101 | 0.5452 | 12.8327 | 0.7473 | -39.2911   |
| f_Sutterellaceae   | IschemicStroke      | Weighted mode             | 19 | 0.9989 | 0.9659 | 1.0330 | 0.9497 | -0.0062 | 0.0101 | 0.5452 | 12.8327 | 0.7473 | -39.2911   |
| f_Sutterellaceae   | LargeArteryStroke   | MR Egger                  | 15 | 1.2188 | 1.0288 | 1.4438 | 0.0395 | -0.1004 | 0.0455 | 0.0460 | 25.7621 | 0.0277 | -5.6556    |
| f_Sutterellaceae   | LargeArteryStroke   | Weighted median           | 15 | 1.0034 | 0.9227 | 1.0913 | 0.9362 | -0.1004 | 0.0455 | 0.0460 | 25.7621 | 0.0277 | -5.6556    |
| f_Sutterellaceae   | LargeArteryStroke   | Inverse variance weighted | 15 | 1.0218 | 0.9499 | 1.0991 | 0.5626 | -0.1004 | 0.0455 | 0.0460 | 25.7621 | 0.0277 | -5.6556    |
| f_Sutterellaceae   | LargeArteryStroke   | Simple mode               | 15 | 1.0555 | 0.8997 | 1.2383 | 0.5180 | -0.1004 | 0.0455 | 0.0460 | 25.7621 | 0.0277 | -5.6556    |
| f_Sutterellaceae   | LargeArteryStroke   | Weighted mode             | 15 | 1.0298 | 0.9036 | 1.1737 | 0.6662 | -0.1004 | 0.0455 | 0.0460 | 25.7621 | 0.0277 | -5.6556    |
| f_Sutterellaceae   | SmallVesselStroke   | MR Egger                  | 15 | 0.9794 | 0.9102 | 1.0538 | 0.5869 | 0.0063  | 0.0201 | 0.7603 | 10.2324 | 0.6748 | -28.5471   |
| f_Sutterellaceae   | SmallVesselStroke   | Weighted median           | 15 | 1.0069 | 0.9661 | 1.0493 | 0.7456 | 0.0063  | 0.0201 | 0.7603 | 10.2324 | 0.6748 | -28.5471   |
| f_Sutterellaceae   | SmallVesselStroke   | Inverse variance weighted | 15 | 0.9899 | 0.9614 | 1.0192 | 0.4961 | 0.0063  | 0.0201 | 0.7603 | 10.2324 | 0.6748 | -28.5471   |
| f_Sutterellaceae   | SmallVesselStroke   | Simple mode               | 15 | 1.0182 | 0.9499 | 1.0915 | 0.6179 | 0.0063  | 0.0201 | 0.7603 | 10.2324 | 0.6748 | -28.5471   |
| f_Sutterellaceae   | SmallVesselStroke   | Weighted mode             | 15 | 1.0188 | 0.9476 | 1.0954 | 0.6224 | 0.0063  | 0.0201 | 0.7603 | 10.2324 | 0.6748 | -28.5471   |
| f_Sutterellaceae   | Stroke              | MR Egger                  | 18 | 1.0091 | 0.9702 | 1.0494 | 0.6587 | -0.0087 | 0.0111 | 0.4456 | 22.3782 | 0.1314 | -27.7190   |
| f_Sutterellaceae   | Stroke              | Weighted median           | 18 | 0.9940 | 0.9752 | 1.0133 | 0.5412 | -0.0087 | 0.0111 | 0.4456 | 22.3782 | 0.1314 | -27.7190   |
| f_Sutterellaceae   | Stroke              | Inverse variance weighted | 18 | 0.9947 | 0.9794 | 1.0102 | 0.4999 | -0.0087 | 0.0111 | 0.4456 | 22.3782 | 0.1314 | -27.7190   |
| f_Sutterellaceae   | Stroke              | Simple mode               | 18 | 0.9837 | 0.9507 | 1.0179 | 0.3592 | -0.0087 | 0.0111 | 0.4456 | 22.3782 | 0.1314 | -27.7190   |
| f_Sutterellaceae   | Stroke              | Weighted mode             | 18 | 0.9871 | 0.9570 | 1.0181 | 0.4203 | -0.0087 | 0.0111 | 0.4456 | 22.3782 | 0.1314 | -27.7190   |
| f_Veillonellaceae  | CardioEmbolicStroke | MR Egger                  | 11 | 1.0577 | 0.5324 | 2.1013 | 0.8763 | -0.0009 | 0.1187 | 0.9942 | 2.1164  | 0.9895 | -1321.1396 |
| f_Veillonellaceae  | CardioEmbolicStroke | Weighted median           | 11 | 1.0700 | 0.9303 | 1.2307 | 0.3432 | -0.0009 | 0.1187 | 0.9942 | 2.1164  | 0.9895 | -1321.1396 |
| f_Veillonellaceae  | CardioEmbolicStroke | Inverse variance weighted | 11 | 1.0550 | 0.9398 | 1.1842 | 0.3642 | -0.0009 | 0.1187 | 0.9942 | 2.1164  | 0.9895 | -1321.1396 |
| f_Veillonellaceae  | CardioEmbolicStroke | Simple mode               | 11 | 1.0645 | 0.8545 | 1.3261 | 0.5896 | -0.0009 | 0.1187 | 0.9942 | 2.1164  | 0.9895 | -1321.1396 |
| f_Veillonellaceae  | CardioEmbolicStroke | Weighted mode             | 11 | 1.0804 | 0.8734 | 1.3365 | 0.4925 | -0.0009 | 0.1187 | 0.9942 | 2.1164  | 0.9895 | -1321.1396 |
| f_Veillonellaceae  | IschemicStroke      | MR Egger                  | 17 | 1.0503 | 0.9805 | 1.1250 | 0.1820 | -0.0181 | 0.0134 | 0.1970 | 17.3960 | 0.3604 | -86.2180   |
| f_Veillonellaceae  | IschemicStroke      | Weighted median           | 17 | 1.0015 | 0.9690 | 1.0351 | 0.9276 | -0.0181 | 0.0134 | 0.1970 | 17.3960 | 0.3604 | -86.2180   |
| f_Veillonellaceae  | IschemicStroke      | Inverse variance weighted | 17 | 1.0045 | 0.9810 | 1.0285 | 0.7109 | -0.0181 | 0.0134 | 0.1970 | 17.3960 | 0.3604 | -86.2180   |
| f_Veillonellaceae  | IschemicStroke      | Simple mode               | 17 | 0.9826 | 0.9205 | 1.0490 | 0.6059 | -0.0181 | 0.0134 | 0.1970 | 17.3960 | 0.3604 | -86.2180   |
| f_Veillonellaceae  | IschemicStroke      | Weighted mode             | 17 | 1.0409 | 0.9801 | 1.1056 | 0.2103 | -0.0181 | 0.0134 | 0.1970 | 17.3960 | 0.3604 | -86.2180   |
| f_Veillonellaceae  | LargeArteryStroke   | MR Egger                  | 13 | 1.2755 | 0.7181 | 2.2655 | 0.4241 | -0.0546 | 0.1019 | 0.6026 | 18.7630 | 0.0655 | -90.4381   |
| f_Veillonellaceae  | LargeArteryStroke   | Weighted median           | 13 | 1.0576 | 0.9322 | 1.1998 | 0.3846 | -0.0546 | 0.1019 | 0.6026 | 18.7630 | 0.0655 | -90.4381   |
| f_Veillonellaceae  | LargeArteryStroke   | Inverse variance weighted | 13 | 1.0931 | 0.9850 | 1.2130 | 0.0939 | -0.0546 | 0.1019 | 0.6026 | 18.7630 | 0.0655 | -90.4381   |
| f_Veillonellaceae  | LargeArteryStroke   | Simple mode               | 13 | 1.0098 | 0.7827 | 1.3027 | 0.9415 | -0.0546 | 0.1019 | 0.6026 | 18.7630 | 0.0655 | -90.4381   |
| f_Veillonellaceae  | LargeArteryStroke   | Weighted mode             | 13 | 1.0072 | 0.7986 | 1.2701 | 0.9529 | -0.0546 | 0.1019 | 0.6026 | 18.7630 | 0.0655 | -90.4381   |
| f_Veillonellaceae  | SmallVesselStroke   | MR Egger                  | 14 | 1.1640 | 1.0001 | 1.3548 | 0.0734 | -0.0470 | 0.0282 | 0.1213 | 8.5785  | 0.8040 | -111.7110  |
| f_Veillonellaceae  | SmallVesselStroke   | Weighted median           | 14 | 1.0409 | 0.9843 | 1.1008 | 0.1597 | -0.0470 | 0.0282 | 0.1213 | 8.5785  | 0.8040 | -111.7110  |
| f_Veillonellaceae  | SmallVesselStroke   | Inverse variance weighted | 14 | 1.0285 | 0.9849 | 1.0741 | 0.2031 | -0.0470 | 0.0282 | 0.1213 | 8.5785  | 0.8040 | -111.7110  |
| f_Veillonellaceae  | SmallVesselStroke   | Simple mode               | 14 | 1.0382 | 0.9498 | 1.1348 | 0.4244 | -0.0470 | 0.0282 | 0.1213 | 8.5785  | 0.8040 | -111.7110  |
| f_Veillonellaceae  | SmallVesselStroke   | Weighted mode             | 14 | 1.0390 | 0.9513 | 1.1348 | 0.4108 | -0.0470 | 0.0282 | 0.1213 | 8.5785  | 0.8040 | -111.7110  |
| f_Veillonellaceae  | Stroke              | MR Egger                  | 20 | 1.0134 | 0.9629 | 1.0666 | 0.6158 | -0.0027 | 0.0103 | 0.7975 | 17.8727 | 0.4641 | -36.2283   |
| f_Veillonellaceae  | Stroke              | Weighted median           | 20 | 0.9993 | 0.9733 | 1.0261 | 0.9611 | -0.0027 | 0.0103 | 0.7975 | 17.8727 | 0.4641 | -36.2283   |
| f_Veillonellaceae  | Stroke              | Inverse variance weighted | 20 | 1.0070 | 0.9885 | 1.0258 | 0.4598 | -0.0027 | 0.0103 | 0.7975 | 17.8727 | 0.4641 | -36.2283   |
| f_Veillonellaceae  | Stroke              | Simple mode               | 20 | 0.9878 | 0.9415 | 1.0363 | 0.6205 | -0.0027 | 0.0103 | 0.7975 | 17.8727 | 0.4641 | -36.2283   |
| f_Veillonellaceae  | Stroke              | Weighted mode             | 20 | 0.9903 | 0.9445 | 1.0383 | 0.6917 | -0.0027 | 0.0103 | 0.7975 | 17.8727 | 0.4641 | -36.2283   |
| g_Abiotrophia      | CardioEmbolicStroke | MR Egger                  | 6  | 0.9522 | 0.4181 | 2.1683 | 0.9127 | -0.0238 | 0.1114 | 0.8414 | 2.8203  | 0.5883 | 238.1603   |

|                   |                     |                           |    |        |        |        |        |         |        |        |         |        |           |
|-------------------|---------------------|---------------------------|----|--------|--------|--------|--------|---------|--------|--------|---------|--------|-----------|
| g_Abiotrophia     | CardioEmbolicStroke | Weighted median           | 6  | 0.8603 | 0.6845 | 1.0813 | 0.1971 | -0.0238 | 0.1114 | 0.8414 | 2.8203  | 0.5883 | 238.1603  |
| g_Abiotrophia     | CardioEmbolicStroke | Inverse variance weighted | 6  | 0.8724 | 0.7304 | 1.0420 | 0.1321 | -0.0238 | 0.1114 | 0.8414 | 2.8203  | 0.5883 | 238.1603  |
| g_Abiotrophia     | CardioEmbolicStroke | Simple mode               | 6  | 0.8080 | 0.5810 | 1.1236 | 0.2608 | -0.0238 | 0.1114 | 0.8414 | 2.8203  | 0.5883 | 238.1603  |
| g_Abiotrophia     | CardioEmbolicStroke | Weighted mode             | 6  | 0.8411 | 0.6205 | 1.1401 | 0.3154 | -0.0238 | 0.1114 | 0.8414 | 2.8203  | 0.5883 | 238.1603  |
| g_Abiotrophia     | IschemicStroke      | MR Egger                  | 15 | 1.0396 | 0.9803 | 1.1024 | 0.2177 | -0.0163 | 0.0117 | 0.1887 | 26.4316 | 0.0228 | -37.5464  |
| g_Abiotrophia     | IschemicStroke      | Weighted median           | 15 | 1.0103 | 0.9729 | 1.0492 | 0.5944 | -0.0163 | 0.0117 | 0.1887 | 26.4316 | 0.0228 | -37.5464  |
| g_Abiotrophia     | IschemicStroke      | Inverse variance weighted | 15 | 1.0044 | 0.9708 | 1.0392 | 0.7985 | -0.0163 | 0.0117 | 0.1887 | 26.4316 | 0.0228 | -37.5464  |
| g_Abiotrophia     | IschemicStroke      | Simple mode               | 15 | 1.0082 | 0.9446 | 1.0760 | 0.8097 | -0.0163 | 0.0117 | 0.1887 | 26.4316 | 0.0228 | -37.5464  |
| g_Abiotrophia     | IschemicStroke      | Weighted mode             | 15 | 1.0218 | 0.9796 | 1.0658 | 0.3336 | -0.0163 | 0.0117 | 0.1887 | 26.4316 | 0.0228 | -37.5464  |
| g_Abiotrophia     | LargeArteryStroke   | MR Egger                  | 9  | 1.1291 | 0.9476 | 1.3454 | 0.2165 | -0.0493 | 0.0322 | 0.1700 | 7.3413  | 0.5003 | -51.5453  |
| g_Abiotrophia     | LargeArteryStroke   | Weighted median           | 9  | 1.0488 | 0.9247 | 1.1895 | 0.4583 | -0.0493 | 0.0322 | 0.1700 | 7.3413  | 0.5003 | -51.5453  |
| g_Abiotrophia     | LargeArteryStroke   | Inverse variance weighted | 9  | 1.0061 | 0.9158 | 1.1052 | 0.8998 | -0.0493 | 0.0322 | 0.1700 | 7.3413  | 0.5003 | -51.5453  |
| g_Abiotrophia     | LargeArteryStroke   | Simple mode               | 9  | 0.8454 | 0.6771 | 1.0555 | 0.1764 | -0.0493 | 0.0322 | 0.1700 | 7.3413  | 0.5003 | -51.5453  |
| g_Abiotrophia     | LargeArteryStroke   | Weighted mode             | 9  | 1.0800 | 0.9342 | 1.2485 | 0.3289 | -0.0493 | 0.0322 | 0.1700 | 7.3413  | 0.5003 | -51.5453  |
| g_Abiotrophia     | SmallVesselStroke   | MR Egger                  | 9  | 1.0906 | 0.9269 | 1.2832 | 0.3305 | -0.0171 | 0.0294 | 0.5793 | 18.0019 | 0.0120 | -58.8078  |
| g_Abiotrophia     | SmallVesselStroke   | Weighted median           | 9  | 1.0795 | 0.9976 | 1.1681 | 0.0573 | -0.0171 | 0.0294 | 0.5793 | 18.0019 | 0.0120 | -58.8078  |
| g_Abiotrophia     | SmallVesselStroke   | Inverse variance weighted | 9  | 1.0468 | 0.9645 | 1.1361 | 0.2739 | -0.0171 | 0.0294 | 0.5793 | 18.0019 | 0.0120 | -58.8078  |
| g_Abiotrophia     | SmallVesselStroke   | Simple mode               | 9  | 1.0968 | 0.9768 | 1.2315 | 0.1566 | -0.0171 | 0.0294 | 0.5793 | 18.0019 | 0.0120 | -58.8078  |
| g_Abiotrophia     | SmallVesselStroke   | Weighted mode             | 9  | 1.1115 | 1.0019 | 1.2331 | 0.0811 | -0.0171 | 0.0294 | 0.5793 | 18.0019 | 0.0120 | -58.8078  |
| g_Abiotrophia     | Stroke              | MR Egger                  | 12 | 1.0254 | 0.9640 | 1.0908 | 0.4444 | -0.0102 | 0.0111 | 0.3794 | 18.6897 | 0.0669 | -187.3467 |
| g_Abiotrophia     | Stroke              | Weighted median           | 12 | 1.0216 | 0.9867 | 1.0578 | 0.2287 | -0.0102 | 0.0111 | 0.3794 | 18.6897 | 0.0669 | -187.3467 |
| g_Abiotrophia     | Stroke              | Inverse variance weighted | 12 | 1.0000 | 0.9699 | 1.0310 | 0.9979 | -0.0102 | 0.0111 | 0.3794 | 18.6897 | 0.0669 | -187.3467 |
| g_Abiotrophia     | Stroke              | Simple mode               | 12 | 1.0228 | 0.9633 | 1.0859 | 0.4768 | -0.0102 | 0.0111 | 0.3794 | 18.6897 | 0.0669 | -187.3467 |
| g_Abiotrophia     | Stroke              | Weighted mode             | 12 | 1.0228 | 0.9797 | 1.0677 | 0.3269 | -0.0102 | 0.0111 | 0.3794 | 18.6897 | 0.0669 | -187.3467 |
| g_Acidaminococcus | CardioEmbolicStroke | MR Egger                  | 7  | 1.0517 | 0.7231 | 1.5294 | 0.8026 | -0.0409 | 0.0815 | 0.6373 | 2.0052  | 0.8484 | -303.6657 |
| g_Acidaminococcus | CardioEmbolicStroke | Weighted median           | 7  | 0.9653 | 0.8332 | 1.1183 | 0.6382 | -0.0409 | 0.0815 | 0.6373 | 2.0052  | 0.8484 | -303.6657 |
| g_Acidaminococcus | CardioEmbolicStroke | Inverse variance weighted | 7  | 0.9603 | 0.8530 | 1.0810 | 0.5021 | -0.0409 | 0.0815 | 0.6373 | 2.0052  | 0.8484 | -303.6657 |
| g_Acidaminococcus | CardioEmbolicStroke | Simple mode               | 7  | 0.9743 | 0.7803 | 1.2165 | 0.8258 | -0.0409 | 0.0815 | 0.6373 | 2.0052  | 0.8484 | -303.6657 |
| g_Acidaminococcus | CardioEmbolicStroke | Weighted mode             | 7  | 0.9843 | 0.8107 | 1.1952 | 0.8785 | -0.0409 | 0.0815 | 0.6373 | 2.0052  | 0.8484 | -303.6657 |
| g_Acidaminococcus | IschemicStroke      | MR Egger                  | 17 | 0.9905 | 0.9610 | 1.0209 | 0.5448 | 0.0050  | 0.0100 | 0.6202 | 16.3815 | 0.3572 | -21.9086  |
| g_Acidaminococcus | IschemicStroke      | Weighted median           | 17 | 0.9945 | 0.9705 | 1.0190 | 0.6551 | 0.0050  | 0.0100 | 0.6202 | 16.3815 | 0.3572 | -21.9086  |
| g_Acidaminococcus | IschemicStroke      | Inverse variance weighted | 17 | 0.9969 | 0.9803 | 1.0137 | 0.7141 | 0.0050  | 0.0100 | 0.6202 | 16.3815 | 0.3572 | -21.9086  |
| g_Acidaminococcus | IschemicStroke      | Simple mode               | 17 | 1.0016 | 0.9600 | 1.0450 | 0.9420 | 0.0050  | 0.0100 | 0.6202 | 16.3815 | 0.3572 | -21.9086  |
| g_Acidaminococcus | IschemicStroke      | Weighted mode             | 17 | 0.9854 | 0.9502 | 1.0219 | 0.4397 | 0.0050  | 0.0100 | 0.6202 | 16.3815 | 0.3572 | -21.9086  |
| g_Acidaminococcus | LargeArteryStroke   | MR Egger                  | 11 | 1.0409 | 0.9120 | 1.1882 | 0.5667 | -0.0209 | 0.0384 | 0.6000 | 10.8462 | 0.2864 | -10.6083  |
| g_Acidaminococcus | LargeArteryStroke   | Weighted median           | 11 | 1.0246 | 0.9385 | 1.1188 | 0.5871 | -0.0209 | 0.0384 | 0.6000 | 10.8462 | 0.2864 | -10.6083  |
| g_Acidaminococcus | LargeArteryStroke   | Inverse variance weighted | 11 | 1.0088 | 0.9441 | 1.0781 | 0.7947 | -0.0209 | 0.0384 | 0.6000 | 10.8462 | 0.2864 | -10.6083  |
| g_Acidaminococcus | LargeArteryStroke   | Simple mode               | 11 | 0.9466 | 0.8055 | 1.1124 | 0.5203 | -0.0209 | 0.0384 | 0.6000 | 10.8462 | 0.2864 | -10.6083  |
| g_Acidaminococcus | LargeArteryStroke   | Weighted mode             | 11 | 1.0493 | 0.9140 | 1.2045 | 0.5101 | -0.0209 | 0.0384 | 0.6000 | 10.8462 | 0.2864 | -10.6083  |
| g_Acidaminococcus | SmallVesselStroke   | MR Egger                  | 14 | 1.0261 | 0.9690 | 1.0866 | 0.3949 | -0.0087 | 0.0184 | 0.6459 | 13.4902 | 0.3344 | -17.3831  |
| g_Acidaminococcus | SmallVesselStroke   | Weighted median           | 14 | 1.0024 | 0.9605 | 1.0461 | 0.9122 | -0.0087 | 0.0184 | 0.6459 | 13.4902 | 0.3344 | -17.3831  |
| g_Acidaminococcus | SmallVesselStroke   | Inverse variance weighted | 14 | 1.0146 | 0.9829 | 1.0473 | 0.3708 | -0.0087 | 0.0184 | 0.6459 | 13.4902 | 0.3344 | -17.3831  |
| g_Acidaminococcus | SmallVesselStroke   | Simple mode               | 14 | 0.9962 | 0.9304 | 1.0666 | 0.9144 | -0.0087 | 0.0184 | 0.6459 | 13.4902 | 0.3344 | -17.3831  |
| g_Acidaminococcus | SmallVesselStroke   | Weighted mode             | 14 | 0.9952 | 0.9336 | 1.0609 | 0.8850 | -0.0087 | 0.0184 | 0.6459 | 13.4902 | 0.3344 | -17.3831  |
| g_Acidaminococcus | Stroke              | MR Egger                  | 15 | 1.0196 | 0.9842 | 1.0562 | 0.3012 | -0.0039 | 0.0096 | 0.6950 | 9.7466  | 0.7145 | -53.7592  |
| g_Acidaminococcus | Stroke              | Weighted median           | 15 | 1.0160 | 0.9934 | 1.0392 | 0.1662 | -0.0039 | 0.0096 | 0.6950 | 9.7466  | 0.7145 | -53.7592  |
| g_Acidaminococcus | Stroke              | Inverse variance weighted | 15 | 1.0132 | 0.9959 | 1.0307 | 0.1350 | -0.0039 | 0.0096 | 0.6950 | 9.7466  | 0.7145 | -53.7592  |
| g_Acidaminococcus | Stroke              | Simple mode               | 15 | 1.0075 | 0.9657 | 1.0512 | 0.7336 | -0.0039 | 0.0096 | 0.6950 | 9.7466  | 0.7145 | -53.7592  |
| g_Acidaminococcus | Stroke              | Weighted mode             | 15 | 1.0109 | 0.9706 | 1.0528 | 0.6090 | -0.0039 | 0.0096 | 0.6950 | 9.7466  | 0.7145 | -53.7592  |
| g_Actinomyces     | CardioEmbolicStroke | MR Egger                  | 9  | 1.3133 | 0.6208 | 2.7783 | 0.4990 | -0.0413 | 0.0842 | 0.6389 | 5.4151  | 0.6094 | 240.4229  |
| g_Actinomyces     | CardioEmbolicStroke | Weighted median           | 9  | 1.1393 | 0.9047 | 1.4347 | 0.2676 | -0.0413 | 0.0842 | 0.6389 | 5.4151  | 0.6094 | 240.4229  |
| g_Actinomyces     | CardioEmbolicStroke | Inverse variance weighted | 9  | 1.0944 | 0.9196 | 1.3025 | 0.3098 | -0.0413 | 0.0842 | 0.6389 | 5.4151  | 0.6094 | 240.4229  |
| g_Actinomyces     | CardioEmbolicStroke | Simple mode               | 9  | 1.1297 | 0.8128 | 1.5701 | 0.4884 | -0.0413 | 0.0842 | 0.6389 | 5.4151  | 0.6094 | 240.4229  |

|                   |                     |                           |    |        |        |        |        |         |        |        |         |        |            |
|-------------------|---------------------|---------------------------|----|--------|--------|--------|--------|---------|--------|--------|---------|--------|------------|
| g_Actinomycetes   | CardioEmbolicStroke | Weighted mode             | 9  | 1.1297 | 0.7929 | 1.6096 | 0.5186 | -0.0413 | 0.0842 | 0.6389 | 5.4151  | 0.6094 | 240.4229   |
| g_Actinomycetes   | IschemicStroke      | MR Egger                  | 16 | 0.9818 | 0.9086 | 1.0610 | 0.6505 | -0.0017 | 0.0108 | 0.8747 | 20.3940 | 0.1182 | -119.8294  |
| g_Actinomycetes   | IschemicStroke      | Weighted median           | 16 | 0.9787 | 0.9352 | 1.0242 | 0.3522 | -0.0017 | 0.0108 | 0.8747 | 20.3940 | 0.1182 | -119.8294  |
| g_Actinomycetes   | IschemicStroke      | Inverse variance weighted | 16 | 0.9764 | 0.9417 | 1.0123 | 0.1952 | -0.0017 | 0.0108 | 0.8747 | 20.3940 | 0.1182 | -119.8294  |
| g_Actinomycetes   | IschemicStroke      | Simple mode               | 16 | 1.0052 | 0.9228 | 1.0950 | 0.9063 | -0.0017 | 0.0108 | 0.8747 | 20.3940 | 0.1182 | -119.8294  |
| g_Actinomycetes   | IschemicStroke      | Weighted mode             | 16 | 0.9842 | 0.9201 | 1.0527 | 0.6487 | -0.0017 | 0.0108 | 0.8747 | 20.3940 | 0.1182 | -119.8294  |
| g_Actinomycetes   | LargeArteryStroke   | MR Egger                  | 12 | 1.0116 | 0.6573 | 1.5567 | 0.9593 | -0.0254 | 0.0508 | 0.6281 | 8.1255  | 0.6166 | -3770.8293 |
| g_Actinomycetes   | LargeArteryStroke   | Weighted median           | 12 | 0.9430 | 0.8015 | 1.1097 | 0.4799 | -0.0254 | 0.0508 | 0.6281 | 8.1255  | 0.6166 | -3770.8293 |
| g_Actinomycetes   | LargeArteryStroke   | Inverse variance weighted | 12 | 0.9103 | 0.8069 | 1.0269 | 0.1263 | -0.0254 | 0.0508 | 0.6281 | 8.1255  | 0.6166 | -3770.8293 |
| g_Actinomycetes   | LargeArteryStroke   | Simple mode               | 12 | 0.9637 | 0.7437 | 1.2487 | 0.7849 | -0.0254 | 0.0508 | 0.6281 | 8.1255  | 0.6166 | -3770.8293 |
| g_Actinomycetes   | LargeArteryStroke   | Weighted mode             | 12 | 0.9590 | 0.7542 | 1.2193 | 0.7388 | -0.0254 | 0.0508 | 0.6281 | 8.1255  | 0.6166 | -3770.8293 |
| g_Actinomycetes   | SmallVesselStroke   | MR Egger                  | 12 | 0.9656 | 0.7276 | 1.2815 | 0.8136 | 0.0003  | 0.0334 | 0.9928 | 13.9495 | 0.1753 | -5306.3487 |
| g_Actinomycetes   | SmallVesselStroke   | Weighted median           | 12 | 0.9104 | 0.8273 | 1.0018 | 0.0546 | 0.0003  | 0.0334 | 0.9928 | 13.9495 | 0.1753 | -5306.3487 |
| g_Actinomycetes   | SmallVesselStroke   | Inverse variance weighted | 12 | 0.9669 | 0.8966 | 1.0427 | 0.3817 | 0.0003  | 0.0334 | 0.9928 | 13.9495 | 0.1753 | -5306.3487 |
| g_Actinomycetes   | SmallVesselStroke   | Simple mode               | 12 | 0.8726 | 0.7339 | 1.0374 | 0.1509 | 0.0003  | 0.0334 | 0.9928 | 13.9495 | 0.1753 | -5306.3487 |
| g_Actinomycetes   | SmallVesselStroke   | Weighted mode             | 12 | 0.8839 | 0.7447 | 1.0492 | 0.1858 | 0.0003  | 0.0334 | 0.9928 | 13.9495 | 0.1753 | -5306.3487 |
| g_Actinomycetes   | Stroke              | MR Egger                  | 16 | 0.9806 | 0.9121 | 1.0542 | 0.6040 | -0.0012 | 0.0094 | 0.9029 | 14.6940 | 0.3994 | -228.3644  |
| g_Actinomycetes   | Stroke              | Weighted median           | 16 | 0.9741 | 0.9373 | 1.0124 | 0.1828 | -0.0012 | 0.0094 | 0.9029 | 14.6940 | 0.3994 | -228.3644  |
| g_Actinomycetes   | Stroke              | Inverse variance weighted | 16 | 0.9765 | 0.9496 | 1.0041 | 0.0941 | -0.0012 | 0.0094 | 0.9029 | 14.6940 | 0.3994 | -228.3644  |
| g_Actinomycetes   | Stroke              | Simple mode               | 16 | 0.9773 | 0.9137 | 1.0454 | 0.5143 | -0.0012 | 0.0094 | 0.9029 | 14.6940 | 0.3994 | -228.3644  |
| g_Actinomycetes   | Stroke              | Weighted mode             | 16 | 0.9766 | 0.9202 | 1.0364 | 0.4470 | -0.0012 | 0.0094 | 0.9029 | 14.6940 | 0.3994 | -228.3644  |
| g_Aggregatibacter | CardioEmbolicStroke | MR Egger                  | 10 | 0.9765 | 0.7778 | 1.2259 | 0.8426 | -0.0247 | 0.0519 | 0.6474 | 7.2117  | 0.5140 | -54.3395   |
| g_Aggregatibacter | CardioEmbolicStroke | Weighted median           | 10 | 0.9058 | 0.8083 | 1.0149 | 0.0882 | -0.0247 | 0.0519 | 0.6474 | 7.2117  | 0.5140 | -54.3395   |
| g_Aggregatibacter | CardioEmbolicStroke | Inverse variance weighted | 10 | 0.9276 | 0.8539 | 1.0076 | 0.0751 | -0.0247 | 0.0519 | 0.6474 | 7.2117  | 0.5140 | -54.3395   |
| g_Aggregatibacter | CardioEmbolicStroke | Simple mode               | 10 | 0.8747 | 0.7221 | 1.0596 | 0.2045 | -0.0247 | 0.0519 | 0.6474 | 7.2117  | 0.5140 | -54.3395   |
| g_Aggregatibacter | CardioEmbolicStroke | Weighted mode             | 10 | 0.8922 | 0.7650 | 1.0404 | 0.1797 | -0.0247 | 0.0519 | 0.6474 | 7.2117  | 0.5140 | -54.3395   |
| g_Aggregatibacter | IschemicStroke      | MR Egger                  | 16 | 1.0050 | 0.9821 | 1.0285 | 0.6773 | -0.0080 | 0.0072 | 0.2834 | 14.4901 | 0.4887 | -38.7812   |
| g_Aggregatibacter | IschemicStroke      | Weighted median           | 16 | 0.9944 | 0.9762 | 1.0129 | 0.5499 | -0.0080 | 0.0072 | 0.2834 | 14.4901 | 0.4887 | -38.7812   |
| g_Aggregatibacter | IschemicStroke      | Inverse variance weighted | 16 | 0.9943 | 0.9811 | 1.0077 | 0.4056 | -0.0080 | 0.0072 | 0.2834 | 14.4901 | 0.4887 | -38.7812   |
| g_Aggregatibacter | IschemicStroke      | Simple mode               | 16 | 0.9962 | 0.9681 | 1.0251 | 0.7963 | -0.0080 | 0.0072 | 0.2834 | 14.4901 | 0.4887 | -38.7812   |
| g_Aggregatibacter | IschemicStroke      | Weighted mode             | 16 | 0.9949 | 0.9727 | 1.0176 | 0.6637 | -0.0080 | 0.0072 | 0.2834 | 14.4901 | 0.4887 | -38.7812   |
| g_Aggregatibacter | LargeArteryStroke   | MR Egger                  | 14 | 0.9746 | 0.8859 | 1.0722 | 0.6065 | 0.0076  | 0.0264 | 0.7770 | 9.0745  | 0.6966 | -16.6211   |
| g_Aggregatibacter | LargeArteryStroke   | Weighted median           | 14 | 0.9754 | 0.9141 | 1.0408 | 0.4524 | 0.0076  | 0.0264 | 0.7770 | 9.0745  | 0.6966 | -16.6211   |
| g_Aggregatibacter | LargeArteryStroke   | Inverse variance weighted | 14 | 0.9864 | 0.9387 | 1.0365 | 0.5878 | 0.0076  | 0.0264 | 0.7770 | 9.0745  | 0.6966 | -16.6211   |
| g_Aggregatibacter | LargeArteryStroke   | Simple mode               | 14 | 0.9535 | 0.8643 | 1.0520 | 0.3599 | 0.0076  | 0.0264 | 0.7770 | 9.0745  | 0.6966 | -16.6211   |
| g_Aggregatibacter | LargeArteryStroke   | Weighted mode             | 14 | 0.9696 | 0.8956 | 1.0498 | 0.4602 | 0.0076  | 0.0264 | 0.7770 | 9.0745  | 0.6966 | -16.6211   |
| g_Aggregatibacter | SmallVesselStroke   | MR Egger                  | 16 | 0.9955 | 0.9471 | 1.0464 | 0.8623 | -0.0031 | 0.0155 | 0.8457 | 20.1100 | 0.1267 | -15.0762   |
| g_Aggregatibacter | SmallVesselStroke   | Weighted median           | 16 | 0.9763 | 0.9394 | 1.0145 | 0.2208 | -0.0031 | 0.0155 | 0.8457 | 20.1100 | 0.1267 | -15.0762   |
| g_Aggregatibacter | SmallVesselStroke   | Inverse variance weighted | 16 | 0.9914 | 0.9641 | 1.0196 | 0.5480 | -0.0031 | 0.0155 | 0.8457 | 20.1100 | 0.1267 | -15.0762   |
| g_Aggregatibacter | SmallVesselStroke   | Simple mode               | 16 | 0.9956 | 0.9325 | 1.0630 | 0.8967 | -0.0031 | 0.0155 | 0.8457 | 20.1100 | 0.1267 | -15.0762   |
| g_Aggregatibacter | SmallVesselStroke   | Weighted mode             | 16 | 0.9772 | 0.9277 | 1.0295 | 0.3997 | -0.0031 | 0.0155 | 0.8457 | 20.1100 | 0.1267 | -15.0762   |
| g_Aggregatibacter | Stroke              | MR Egger                  | 14 | 1.0016 | 0.9624 | 1.0424 | 0.9391 | -0.0062 | 0.0095 | 0.5288 | 8.2923  | 0.7619 | -176.7053  |
| g_Aggregatibacter | Stroke              | Weighted median           | 14 | 0.9950 | 0.9754 | 1.0150 | 0.6226 | -0.0062 | 0.0095 | 0.5288 | 8.2923  | 0.7619 | -176.7053  |
| g_Aggregatibacter | Stroke              | Inverse variance weighted | 14 | 0.9894 | 0.9746 | 1.0045 | 0.1672 | -0.0062 | 0.0095 | 0.5288 | 8.2923  | 0.7619 | -176.7053  |
| g_Aggregatibacter | Stroke              | Simple mode               | 14 | 0.9934 | 0.9633 | 1.0244 | 0.6779 | -0.0062 | 0.0095 | 0.5288 | 8.2923  | 0.7619 | -176.7053  |
| g_Aggregatibacter | Stroke              | Weighted mode             | 14 | 0.9957 | 0.9678 | 1.0245 | 0.7727 | -0.0062 | 0.0095 | 0.5288 | 8.2923  | 0.7619 | -176.7053  |
| g_Alistipes       | CardioEmbolicStroke | MR Egger                  | 7  | 0.8598 | 0.2870 | 2.5761 | 0.7981 | 0.0572  | 0.1765 | 0.7588 | 10.9556 | 0.0523 | -899.7325  |
| g_Alistipes       | CardioEmbolicStroke | Weighted median           | 7  | 1.0106 | 0.8203 | 1.2451 | 0.9210 | 0.0572  | 0.1765 | 0.7588 | 10.9556 | 0.0523 | -899.7325  |
| g_Alistipes       | CardioEmbolicStroke | Inverse variance weighted | 7  | 1.0273 | 0.8416 | 1.2541 | 0.7910 | 0.0572  | 0.1765 | 0.7588 | 10.9556 | 0.0523 | -899.7325  |
| g_Alistipes       | CardioEmbolicStroke | Simple mode               | 7  | 0.9808 | 0.7118 | 1.3513 | 0.9093 | 0.0572  | 0.1765 | 0.7588 | 10.9556 | 0.0523 | -899.7325  |
| g_Alistipes       | CardioEmbolicStroke | Weighted mode             | 7  | 1.0245 | 0.7791 | 1.3471 | 0.8683 | 0.0572  | 0.1765 | 0.7588 | 10.9556 | 0.0523 | -899.7325  |
| g_Alistipes       | IschemicStroke      | MR Egger                  | 10 | 0.9897 | 0.9293 | 1.0540 | 0.7551 | 0.0018  | 0.0119 | 0.8827 | 1.5018  | 0.9927 | -544.9942  |
| g_Alistipes       | IschemicStroke      | Weighted median           | 10 | 0.9985 | 0.9635 | 1.0348 | 0.9347 | 0.0018  | 0.0119 | 0.8827 | 1.5018  | 0.9927 | -544.9942  |

|                |                     |                           |    |        |        |        |        |         |        |        |         |        |            |
|----------------|---------------------|---------------------------|----|--------|--------|--------|--------|---------|--------|--------|---------|--------|------------|
| g_Alistipes    | IschemicStroke      | Inverse variance weighted | 10 | 0.9941 | 0.9676 | 1.0213 | 0.6659 | 0.0018  | 0.0119 | 0.8827 | 1.5018  | 0.9927 | -544.9942  |
| g_Alistipes    | IschemicStroke      | Simple mode               | 10 | 1.0009 | 0.9503 | 1.0541 | 0.9736 | 0.0018  | 0.0119 | 0.8827 | 1.5018  | 0.9927 | -544.9942  |
| g_Alistipes    | IschemicStroke      | Weighted mode             | 10 | 0.9996 | 0.9509 | 1.0507 | 0.9865 | 0.0018  | 0.0119 | 0.8827 | 1.5018  | 0.9927 | -544.9942  |
| g_Alistipes    | LargeArteryStroke   | MR Egger                  | 7  | 0.8788 | 0.5081 | 1.5200 | 0.6633 | 0.0285  | 0.0883 | 0.7601 | 3.3500  | 0.6462 | -2420.9390 |
| g_Alistipes    | LargeArteryStroke   | Weighted median           | 7  | 0.9661 | 0.8414 | 1.1094 | 0.6252 | 0.0285  | 0.0883 | 0.7601 | 3.3500  | 0.6462 | -2420.9390 |
| g_Alistipes    | LargeArteryStroke   | Inverse variance weighted | 7  | 0.9600 | 0.8615 | 1.0697 | 0.4598 | 0.0285  | 0.0883 | 0.7601 | 3.3500  | 0.6462 | -2420.9390 |
| g_Alistipes    | LargeArteryStroke   | Simple mode               | 7  | 1.0425 | 0.8425 | 1.2900 | 0.7148 | 0.0285  | 0.0883 | 0.7601 | 3.3500  | 0.6462 | -2420.9390 |
| g_Alistipes    | LargeArteryStroke   | Weighted mode             | 7  | 0.8884 | 0.7090 | 1.1130 | 0.3431 | 0.0285  | 0.0883 | 0.7601 | 3.3500  | 0.6462 | -2420.9390 |
| g_Alistipes    | SmallVesselStroke   | MR Egger                  | 7  | 1.0233 | 0.7545 | 1.3877 | 0.8882 | -0.0007 | 0.0491 | 0.9899 | 1.8808  | 0.8654 | -5923.2445 |
| g_Alistipes    | SmallVesselStroke   | Weighted median           | 7  | 1.0274 | 0.9523 | 1.1084 | 0.4854 | -0.0007 | 0.0491 | 0.9899 | 1.8808  | 0.8654 | -5923.2445 |
| g_Alistipes    | SmallVesselStroke   | Inverse variance weighted | 7  | 1.0212 | 0.9616 | 1.0845 | 0.4947 | -0.0007 | 0.0491 | 0.9899 | 1.8808  | 0.8654 | -5923.2445 |
| g_Alistipes    | SmallVesselStroke   | Simple mode               | 7  | 1.0442 | 0.9293 | 1.1732 | 0.4944 | -0.0007 | 0.0491 | 0.9899 | 1.8808  | 0.8654 | -5923.2445 |
| g_Alistipes    | SmallVesselStroke   | Weighted mode             | 7  | 1.0425 | 0.9371 | 1.1597 | 0.4734 | -0.0007 | 0.0491 | 0.9899 | 1.8808  | 0.8654 | -5923.2445 |
| g_Alistipes    | Stroke              | MR Egger                  | 12 | 1.0009 | 0.9480 | 1.0567 | 0.9754 | -0.0053 | 0.0102 | 0.6122 | 3.3848  | 0.9709 | -208.7618  |
| g_Alistipes    | Stroke              | Weighted median           | 12 | 0.9937 | 0.9654 | 1.0228 | 0.6685 | -0.0053 | 0.0102 | 0.6122 | 3.3848  | 0.9709 | -208.7618  |
| g_Alistipes    | Stroke              | Inverse variance weighted | 12 | 0.9878 | 0.9657 | 1.0104 | 0.2869 | -0.0053 | 0.0102 | 0.6122 | 3.3848  | 0.9709 | -208.7618  |
| g_Alistipes    | Stroke              | Simple mode               | 12 | 0.9985 | 0.9570 | 1.0418 | 0.9468 | -0.0053 | 0.0102 | 0.6122 | 3.3848  | 0.9709 | -208.7618  |
| g_Alistipes    | Stroke              | Weighted mode             | 12 | 0.9979 | 0.9553 | 1.0424 | 0.9261 | -0.0053 | 0.0102 | 0.6122 | 3.3848  | 0.9709 | -208.7618  |
| g_Anaerococcus | CardioEmbolicStroke | MR Egger                  | 11 | 1.2115 | 0.8543 | 1.7182 | 0.3098 | -0.0869 | 0.0742 | 0.2715 | 6.6066  | 0.7620 | -61.7034   |
| g_Anaerococcus | CardioEmbolicStroke | Weighted median           | 11 | 0.9750 | 0.8453 | 1.1247 | 0.7285 | -0.0869 | 0.0742 | 0.2715 | 6.6066  | 0.7620 | -61.7034   |
| g_Anaerococcus | CardioEmbolicStroke | Inverse variance weighted | 11 | 0.9925 | 0.8944 | 1.1014 | 0.8879 | -0.0869 | 0.0742 | 0.2715 | 6.6066  | 0.7620 | -61.7034   |
| g_Anaerococcus | CardioEmbolicStroke | Simple mode               | 11 | 0.9501 | 0.7597 | 1.1883 | 0.6635 | -0.0869 | 0.0742 | 0.2715 | 6.6066  | 0.7620 | -61.7034   |
| g_Anaerococcus | CardioEmbolicStroke | Weighted mode             | 11 | 0.9485 | 0.7663 | 1.1739 | 0.6374 | -0.0869 | 0.0742 | 0.2715 | 6.6066  | 0.7620 | -61.7034   |
| g_Anaerococcus | IschemicStroke      | MR Egger                  | 24 | 1.0153 | 0.9879 | 1.0434 | 0.2885 | -0.0040 | 0.0088 | 0.6526 | 24.4002 | 0.3266 | -16.0219   |
| g_Anaerococcus | IschemicStroke      | Weighted median           | 24 | 1.0034 | 0.9835 | 1.0237 | 0.7405 | -0.0040 | 0.0088 | 0.6526 | 24.4002 | 0.3266 | -16.0219   |
| g_Anaerococcus | IschemicStroke      | Inverse variance weighted | 24 | 1.0099 | 0.9949 | 1.0251 | 0.1955 | -0.0040 | 0.0088 | 0.6526 | 24.4002 | 0.3266 | -16.0219   |
| g_Anaerococcus | IschemicStroke      | Simple mode               | 24 | 1.0029 | 0.9676 | 1.0394 | 0.8770 | -0.0040 | 0.0088 | 0.6526 | 24.4002 | 0.3266 | -16.0219   |
| g_Anaerococcus | IschemicStroke      | Weighted mode             | 24 | 0.9988 | 0.9674 | 1.0313 | 0.9437 | -0.0040 | 0.0088 | 0.6526 | 24.4002 | 0.3266 | -16.0219   |
| g_Anaerococcus | LargeArteryStroke   | MR Egger                  | 19 | 0.9445 | 0.8416 | 1.0601 | 0.3461 | 0.0353  | 0.0317 | 0.2813 | 16.5131 | 0.5568 | -12.0790   |
| g_Anaerococcus | LargeArteryStroke   | Weighted median           | 19 | 0.9809 | 0.9092 | 1.0583 | 0.6185 | 0.0353  | 0.0317 | 0.2813 | 16.5131 | 0.5568 | -12.0790   |
| g_Anaerococcus | LargeArteryStroke   | Inverse variance weighted | 19 | 1.0003 | 0.9462 | 1.0576 | 0.9903 | 0.0353  | 0.0317 | 0.2813 | 16.5131 | 0.5568 | -12.0790   |
| g_Anaerococcus | LargeArteryStroke   | Simple mode               | 19 | 0.9422 | 0.8177 | 1.0857 | 0.4212 | 0.0353  | 0.0317 | 0.2813 | 16.5131 | 0.5568 | -12.0790   |
| g_Anaerococcus | LargeArteryStroke   | Weighted mode             | 19 | 0.9518 | 0.8520 | 1.0633 | 0.3933 | 0.0353  | 0.0317 | 0.2813 | 16.5131 | 0.5568 | -12.0790   |
| g_Anaerococcus | SmallVesselStroke   | MR Egger                  | 20 | 1.0639 | 0.9853 | 1.1487 | 0.1311 | -0.0320 | 0.0214 | 0.1529 | 30.2399 | 0.0488 | -11.6472   |
| g_Anaerococcus | SmallVesselStroke   | Weighted median           | 20 | 0.9711 | 0.9257 | 1.0188 | 0.2306 | -0.0320 | 0.0214 | 0.1529 | 30.2399 | 0.0488 | -11.6472   |
| g_Anaerococcus | SmallVesselStroke   | Inverse variance weighted | 20 | 1.0110 | 0.9727 | 1.0507 | 0.5795 | -0.0320 | 0.0214 | 0.1529 | 30.2399 | 0.0488 | -11.6472   |
| g_Anaerococcus | SmallVesselStroke   | Simple mode               | 20 | 0.9611 | 0.8745 | 1.0562 | 0.4200 | -0.0320 | 0.0214 | 0.1529 | 30.2399 | 0.0488 | -11.6472   |
| g_Anaerococcus | SmallVesselStroke   | Weighted mode             | 20 | 0.9567 | 0.8783 | 1.0421 | 0.3234 | -0.0320 | 0.0214 | 0.1529 | 30.2399 | 0.0488 | -11.6472   |
| g_Anaerococcus | Stroke              | MR Egger                  | 22 | 1.0030 | 0.9761 | 1.0307 | 0.8295 | -0.0009 | 0.0077 | 0.9099 | 17.9131 | 0.5931 | -37.9420   |
| g_Anaerococcus | Stroke              | Weighted median           | 22 | 0.9991 | 0.9804 | 1.0181 | 0.9235 | -0.0009 | 0.0077 | 0.9099 | 17.9131 | 0.5931 | -37.9420   |
| g_Anaerococcus | Stroke              | Inverse variance weighted | 22 | 1.0017 | 0.9878 | 1.0157 | 0.8151 | -0.0009 | 0.0077 | 0.9099 | 17.9131 | 0.5931 | -37.9420   |
| g_Anaerococcus | Stroke              | Simple mode               | 22 | 1.0024 | 0.9687 | 1.0373 | 0.8931 | -0.0009 | 0.0077 | 0.9099 | 17.9131 | 0.5931 | -37.9420   |
| g_Anaerococcus | Stroke              | Weighted mode             | 22 | 0.9971 | 0.9656 | 1.0296 | 0.8600 | -0.0009 | 0.0077 | 0.9099 | 17.9131 | 0.5931 | -37.9420   |
| g_Anaerofustis | CardioEmbolicStroke | MR Egger                  | 9  | 1.1315 | 0.3218 | 3.9781 | 0.8527 | -0.0102 | 0.1242 | 0.9371 | 4.0095  | 0.7787 | 89.6969    |
| g_Anaerofustis | CardioEmbolicStroke | Weighted median           | 9  | 1.0529 | 0.8180 | 1.3552 | 0.6889 | -0.0102 | 0.1242 | 0.9371 | 4.0095  | 0.7787 | 89.6969    |
| g_Anaerofustis | CardioEmbolicStroke | Inverse variance weighted | 9  | 1.0743 | 0.8877 | 1.3002 | 0.4614 | -0.0102 | 0.1242 | 0.9371 | 4.0095  | 0.7787 | 89.6969    |
| g_Anaerofustis | CardioEmbolicStroke | Simple mode               | 9  | 1.0389 | 0.7109 | 1.5182 | 0.8486 | -0.0102 | 0.1242 | 0.9371 | 4.0095  | 0.7787 | 89.6969    |
| g_Anaerofustis | CardioEmbolicStroke | Weighted mode             | 9  | 1.0389 | 0.7201 | 1.4989 | 0.8434 | -0.0102 | 0.1242 | 0.9371 | 4.0095  | 0.7787 | 89.6969    |
| g_Anaerofustis | IschemicStroke      | MR Egger                  | 14 | 0.9479 | 0.8520 | 1.0546 | 0.3448 | 0.0089  | 0.0120 | 0.4731 | 5.5070  | 0.9389 | -584.2650  |
| g_Anaerofustis | IschemicStroke      | Weighted median           | 14 | 0.9806 | 0.9336 | 1.0299 | 0.4334 | 0.0089  | 0.0120 | 0.4731 | 5.5070  | 0.9389 | -584.2650  |
| g_Anaerofustis | IschemicStroke      | Inverse variance weighted | 14 | 0.9843 | 0.9478 | 1.0222 | 0.4118 | 0.0089  | 0.0120 | 0.4731 | 5.5070  | 0.9389 | -584.2650  |
| g_Anaerofustis | IschemicStroke      | Simple mode               | 14 | 0.9624 | 0.8900 | 1.0407 | 0.3540 | 0.0089  | 0.0120 | 0.4731 | 5.5070  | 0.9389 | -584.2650  |
| g_Anaerofustis | IschemicStroke      | Weighted mode             | 14 | 0.9959 | 0.9175 | 1.0810 | 0.9233 | 0.0089  | 0.0120 | 0.4731 | 5.5070  | 0.9389 | -584.2650  |

|                 |                     |                           |    |        |        |        |        |         |        |        |         |        |           |
|-----------------|---------------------|---------------------------|----|--------|--------|--------|--------|---------|--------|--------|---------|--------|-----------|
| g_Anaerofustis  | LargeArteryStroke   | MR Egger                  | 10 | 1.3252 | 0.6486 | 2.7078 | 0.4621 | -0.0485 | 0.0724 | 0.5218 | 5.0474  | 0.7525 | 241.6186  |
| g_Anaerofustis  | LargeArteryStroke   | Weighted median           | 10 | 1.0121 | 0.8371 | 1.2237 | 0.9011 | -0.0485 | 0.0724 | 0.5218 | 5.0474  | 0.7525 | 241.6186  |
| g_Anaerofustis  | LargeArteryStroke   | Inverse variance weighted | 10 | 1.0429 | 0.9087 | 1.1968 | 0.5502 | -0.0485 | 0.0724 | 0.5218 | 5.0474  | 0.7525 | 241.6186  |
| g_Anaerofustis  | LargeArteryStroke   | Simple mode               | 10 | 0.9146 | 0.6782 | 1.2334 | 0.5729 | -0.0485 | 0.0724 | 0.5218 | 5.0474  | 0.7525 | 241.6186  |
| g_Anaerofustis  | LargeArteryStroke   | Weighted mode             | 10 | 1.2130 | 0.8925 | 1.6486 | 0.2486 | -0.0485 | 0.0724 | 0.5218 | 5.0474  | 0.7525 | 241.6186  |
| g_Anaerofustis  | SmallVesselStroke   | MR Egger                  | 11 | 1.1136 | 0.8124 | 1.5266 | 0.5204 | -0.0328 | 0.0328 | 0.3436 | 8.9196  | 0.5397 | 2100.8817 |
| g_Anaerofustis  | SmallVesselStroke   | Weighted median           | 11 | 0.9359 | 0.8460 | 1.0355 | 0.1993 | -0.0328 | 0.0328 | 0.3436 | 8.9196  | 0.5397 | 2100.8817 |
| g_Anaerofustis  | SmallVesselStroke   | Inverse variance weighted | 11 | 0.9525 | 0.8842 | 1.0260 | 0.1993 | -0.0328 | 0.0328 | 0.3436 | 8.9196  | 0.5397 | 2100.8817 |
| g_Anaerofustis  | SmallVesselStroke   | Simple mode               | 11 | 0.9425 | 0.8054 | 1.1028 | 0.4768 | -0.0328 | 0.0328 | 0.3436 | 8.9196  | 0.5397 | 2100.8817 |
| g_Anaerofustis  | SmallVesselStroke   | Weighted mode             | 11 | 0.9303 | 0.7864 | 1.1006 | 0.4193 | -0.0328 | 0.0328 | 0.3436 | 8.9196  | 0.5397 | 2100.8817 |
| g_Anaerofustis  | Stroke              | MR Egger                  | 16 | 0.9966 | 0.9162 | 1.0839 | 0.9371 | 0.0000  | 0.0097 | 0.9997 | 16.1108 | 0.3067 | -259.0805 |
| g_Anaerofustis  | Stroke              | Weighted median           | 16 | 1.0109 | 0.9692 | 1.0543 | 0.6151 | 0.0000  | 0.0097 | 0.9997 | 16.1108 | 0.3067 | -259.0805 |
| g_Anaerofustis  | Stroke              | Inverse variance weighted | 16 | 0.9965 | 0.9655 | 1.0286 | 0.8303 | 0.0000  | 0.0097 | 0.9997 | 16.1108 | 0.3067 | -259.0805 |
| g_Anaerofustis  | Stroke              | Simple mode               | 16 | 1.0086 | 0.9403 | 1.0820 | 0.8133 | 0.0000  | 0.0097 | 0.9997 | 16.1108 | 0.3067 | -259.0805 |
| g_Anaerofustis  | Stroke              | Weighted mode             | 16 | 1.0086 | 0.9409 | 1.0813 | 0.8115 | 0.0000  | 0.0097 | 0.9997 | 16.1108 | 0.3067 | -259.0805 |
| g_Anaerostipes  | CardioEmbolicStroke | MR Egger                  | 10 | 0.4032 | 0.1571 | 1.0351 | 0.0957 | 0.1830  | 0.0848 | 0.0629 | 7.0827  | 0.6285 | 37.8886   |
| g_Anaerostipes  | CardioEmbolicStroke | Weighted median           | 10 | 1.1334 | 0.8686 | 1.4789 | 0.3563 | 0.1830  | 0.0848 | 0.0629 | 7.0827  | 0.6285 | 37.8886   |
| g_Anaerostipes  | CardioEmbolicStroke | Inverse variance weighted | 10 | 1.1083 | 0.8945 | 1.3732 | 0.3472 | 0.1830  | 0.0848 | 0.0629 | 7.0827  | 0.6285 | 37.8886   |
| g_Anaerostipes  | CardioEmbolicStroke | Simple mode               | 10 | 1.1553 | 0.7426 | 1.7973 | 0.5380 | 0.1830  | 0.0848 | 0.0629 | 7.0827  | 0.6285 | 37.8886   |
| g_Anaerostipes  | CardioEmbolicStroke | Weighted mode             | 10 | 1.1728 | 0.7626 | 1.8038 | 0.4864 | 0.1830  | 0.0848 | 0.0629 | 7.0827  | 0.6285 | 37.8886   |
| g_Anaerostipes  | IschemicStroke      | MR Egger                  | 20 | 0.9822 | 0.9074 | 1.0632 | 0.6620 | 0.0033  | 0.0098 | 0.7387 | 23.7167 | 0.1645 | -77.0488  |
| g_Anaerostipes  | IschemicStroke      | Weighted median           | 20 | 1.0197 | 0.9739 | 1.0676 | 0.4063 | 0.0033  | 0.0098 | 0.7387 | 23.7167 | 0.1645 | -77.0488  |
| g_Anaerostipes  | IschemicStroke      | Inverse variance weighted | 20 | 0.9940 | 0.9572 | 1.0322 | 0.7548 | 0.0033  | 0.0098 | 0.7387 | 23.7167 | 0.1645 | -77.0488  |
| g_Anaerostipes  | IschemicStroke      | Simple mode               | 20 | 1.0297 | 0.9538 | 1.1116 | 0.4635 | 0.0033  | 0.0098 | 0.7387 | 23.7167 | 0.1645 | -77.0488  |
| g_Anaerostipes  | IschemicStroke      | Weighted mode             | 20 | 1.0337 | 0.9633 | 1.1093 | 0.3690 | 0.0033  | 0.0098 | 0.7387 | 23.7167 | 0.1645 | -77.0488  |
| g_Anaerostipes  | LargeArteryStroke   | MR Egger                  | 16 | 1.1258 | 0.8353 | 1.5174 | 0.4494 | -0.0233 | 0.0331 | 0.4932 | 12.5819 | 0.5597 | -233.7417 |
| g_Anaerostipes  | LargeArteryStroke   | Weighted median           | 16 | 1.0080 | 0.8462 | 1.2008 | 0.9286 | -0.0233 | 0.0331 | 0.4932 | 12.5819 | 0.5597 | -233.7417 |
| g_Anaerostipes  | LargeArteryStroke   | Inverse variance weighted | 16 | 1.0211 | 0.9031 | 1.1545 | 0.7392 | -0.0233 | 0.0331 | 0.4932 | 12.5819 | 0.5597 | -233.7417 |
| g_Anaerostipes  | LargeArteryStroke   | Simple mode               | 16 | 1.0805 | 0.7811 | 1.4947 | 0.6467 | -0.0233 | 0.0331 | 0.4932 | 12.5819 | 0.5597 | -233.7417 |
| g_Anaerostipes  | LargeArteryStroke   | Weighted mode             | 16 | 1.1134 | 0.7956 | 1.5582 | 0.5405 | -0.0233 | 0.0331 | 0.4932 | 12.5819 | 0.5597 | -233.7417 |
| g_Anaerostipes  | SmallVesselStroke   | MR Egger                  | 16 | 0.9801 | 0.8095 | 1.1866 | 0.8396 | 0.0029  | 0.0212 | 0.8951 | 18.5712 | 0.1820 | -266.1808 |
| g_Anaerostipes  | SmallVesselStroke   | Weighted median           | 16 | 1.0125 | 0.9173 | 1.1175 | 0.8057 | 0.0029  | 0.0212 | 0.8951 | 18.5712 | 0.1820 | -266.1808 |
| g_Anaerostipes  | SmallVesselStroke   | Inverse variance weighted | 16 | 0.9919 | 0.9192 | 1.0702 | 0.8329 | 0.0029  | 0.0212 | 0.8951 | 18.5712 | 0.1820 | -266.1808 |
| g_Anaerostipes  | SmallVesselStroke   | Simple mode               | 16 | 1.0021 | 0.8309 | 1.2085 | 0.9830 | 0.0029  | 0.0212 | 0.8951 | 18.5712 | 0.1820 | -266.1808 |
| g_Anaerostipes  | SmallVesselStroke   | Weighted mode             | 16 | 1.0466 | 0.8840 | 1.2391 | 0.6046 | 0.0029  | 0.0212 | 0.8951 | 18.5712 | 0.1820 | -266.1808 |
| g_Anaerostipes  | Stroke              | MR Egger                  | 18 | 0.9445 | 0.8782 | 1.0158 | 0.1439 | 0.0115  | 0.0083 | 0.1832 | 16.9414 | 0.4583 | -209.3991 |
| g_Anaerostipes  | Stroke              | Weighted median           | 18 | 1.0005 | 0.9600 | 1.0426 | 0.9814 | 0.0115  | 0.0083 | 0.1832 | 16.9414 | 0.4583 | -209.3991 |
| g_Anaerostipes  | Stroke              | Inverse variance weighted | 18 | 0.9897 | 0.9592 | 1.0210 | 0.5137 | 0.0115  | 0.0083 | 0.1832 | 16.9414 | 0.4583 | -209.3991 |
| g_Anaerostipes  | Stroke              | Simple mode               | 18 | 1.0183 | 0.9529 | 1.0883 | 0.5989 | 0.0115  | 0.0083 | 0.1832 | 16.9414 | 0.4583 | -209.3991 |
| g_Anaerostipes  | Stroke              | Weighted mode             | 18 | 1.0145 | 0.9516 | 1.0816 | 0.6647 | 0.0115  | 0.0083 | 0.1832 | 16.9414 | 0.4583 | -209.3991 |
| g_Anaerotruncus | CardioEmbolicStroke | MR Egger                  | 10 | 0.9522 | 0.6568 | 1.3804 | 0.8026 | 0.0044  | 0.0414 | 0.9177 | 1.7503  | 0.9877 | 1031.7160 |
| g_Anaerotruncus | CardioEmbolicStroke | Weighted median           | 10 | 0.9781 | 0.7756 | 1.2335 | 0.8518 | 0.0044  | 0.0414 | 0.9177 | 1.7503  | 0.9877 | 1031.7160 |
| g_Anaerotruncus | CardioEmbolicStroke | Inverse variance weighted | 10 | 0.9693 | 0.8121 | 1.1569 | 0.7296 | 0.0044  | 0.0414 | 0.9177 | 1.7503  | 0.9877 | 1031.7160 |
| g_Anaerotruncus | CardioEmbolicStroke | Simple mode               | 10 | 1.0285 | 0.7405 | 1.4286 | 0.8705 | 0.0044  | 0.0414 | 0.9177 | 1.7503  | 0.9877 | 1031.7160 |
| g_Anaerotruncus | CardioEmbolicStroke | Weighted mode             | 10 | 0.9996 | 0.7666 | 1.3035 | 0.9978 | 0.0044  | 0.0414 | 0.9177 | 1.7503  | 0.9877 | 1031.7160 |
| g_Anaerotruncus | IschemicStroke      | MR Egger                  | 18 | 1.0899 | 1.0090 | 1.1773 | 0.0438 | -0.0223 | 0.0103 | 0.0466 | 35.4705 | 0.0054 | -85.5757  |
| g_Anaerotruncus | IschemicStroke      | Weighted median           | 18 | 1.0067 | 0.9606 | 1.0550 | 0.7798 | -0.0223 | 0.0103 | 0.0466 | 35.4705 | 0.0054 | -85.5757  |
| g_Anaerotruncus | IschemicStroke      | Inverse variance weighted | 18 | 1.0152 | 0.9691 | 1.0635 | 0.5251 | -0.0223 | 0.0103 | 0.0466 | 35.4705 | 0.0054 | -85.5757  |
| g_Anaerotruncus | IschemicStroke      | Simple mode               | 18 | 1.0167 | 0.9439 | 1.0951 | 0.6680 | -0.0223 | 0.0103 | 0.0466 | 35.4705 | 0.0054 | -85.5757  |
| g_Anaerotruncus | IschemicStroke      | Weighted mode             | 18 | 1.0054 | 0.9527 | 1.0611 | 0.8459 | -0.0223 | 0.0103 | 0.0466 | 35.4705 | 0.0054 | -85.5757  |
| g_Anaerotruncus | LargeArteryStroke   | MR Egger                  | 15 | 1.2119 | 0.9716 | 1.5117 | 0.1120 | -0.0414 | 0.0279 | 0.1614 | 15.6824 | 0.3332 | -51.5915  |
| g_Anaerotruncus | LargeArteryStroke   | Weighted median           | 15 | 1.0313 | 0.8793 | 1.2097 | 0.7047 | -0.0414 | 0.0279 | 0.1614 | 15.6824 | 0.3332 | -51.5915  |
| g_Anaerotruncus | LargeArteryStroke   | Inverse variance weighted | 15 | 1.0499 | 0.9324 | 1.1821 | 0.4212 | -0.0414 | 0.0279 | 0.1614 | 15.6824 | 0.3332 | -51.5915  |

|                 |                     |                           |    |        |        |            |        |         |        |        |         |        |            |
|-----------------|---------------------|---------------------------|----|--------|--------|------------|--------|---------|--------|--------|---------|--------|------------|
| g_Anaerotruncus | LargeArteryStroke   | Simple mode               | 15 | 1.0022 | 0.7864 | 1.2771     | 0.9863 | -0.0414 | 0.0279 | 0.1614 | 15.6824 | 0.3332 | -51.5915   |
| g_Anaerotruncus | LargeArteryStroke   | Weighted mode             | 15 | 1.0359 | 0.8741 | 1.2276     | 0.6903 | -0.0414 | 0.0279 | 0.1614 | 15.6824 | 0.3332 | -51.5915   |
| g_Anaerotruncus | SmallVesselStroke   | MR Egger                  | 15 | 1.0441 | 0.9262 | 1.1769     | 0.4929 | -0.0052 | 0.0152 | 0.7373 | 7.9415  | 0.8474 | -457.3701  |
| g_Anaerotruncus | SmallVesselStroke   | Weighted median           | 15 | 1.0293 | 0.9460 | 1.1200     | 0.5021 | -0.0052 | 0.0152 | 0.7373 | 7.9415  | 0.8474 | -457.3701  |
| g_Anaerotruncus | SmallVesselStroke   | Inverse variance weighted | 15 | 1.0255 | 0.9640 | 1.0909     | 0.4246 | -0.0052 | 0.0152 | 0.7373 | 7.9415  | 0.8474 | -457.3701  |
| g_Anaerotruncus | SmallVesselStroke   | Simple mode               | 15 | 1.0627 | 0.9288 | 1.2158     | 0.3910 | -0.0052 | 0.0152 | 0.7373 | 7.9415  | 0.8474 | -457.3701  |
| g_Anaerotruncus | SmallVesselStroke   | Weighted mode             | 15 | 1.0172 | 0.9222 | 1.1219     | 0.7386 | -0.0052 | 0.0152 | 0.7373 | 7.9415  | 0.8474 | -457.3701  |
| g_Anaerotruncus | Stroke              | MR Egger                  | 17 | 1.0720 | 1.0045 | 1.1441     | 0.0536 | -0.0159 | 0.0077 | 0.0573 | 17.7454 | 0.3390 | -424.4311  |
| g_Anaerotruncus | Stroke              | Weighted median           | 17 | 1.0085 | 0.9621 | 1.0571     | 0.7252 | -0.0159 | 0.0077 | 0.0573 | 17.7454 | 0.3390 | -424.4311  |
| g_Anaerotruncus | Stroke              | Inverse variance weighted | 17 | 1.0098 | 0.9768 | 1.0439     | 0.5641 | -0.0159 | 0.0077 | 0.0573 | 17.7454 | 0.3390 | -424.4311  |
| g_Anaerotruncus | Stroke              | Simple mode               | 17 | 1.0200 | 0.9467 | 1.0990     | 0.6096 | -0.0159 | 0.0077 | 0.0573 | 17.7454 | 0.3390 | -424.4311  |
| g_Anaerotruncus | Stroke              | Weighted mode             | 17 | 1.0113 | 0.9593 | 1.0661     | 0.6823 | -0.0159 | 0.0077 | 0.0573 | 17.7454 | 0.3390 | -424.4311  |
| g_Atopobium     | CardioEmbolicStroke | MR Egger                  | 3  | 0.4357 | 0.0000 | 36091.5204 | 0.9091 | 0.1380  | 1.0176 | 0.9142 | 3.5193  | 0.0607 | 9.5550     |
| g_Atopobium     | CardioEmbolicStroke | Weighted median           | 3  | 0.8769 | 0.5263 | 1.4612     | 0.6142 | 0.1380  | 1.0176 | 0.9142 | 3.5193  | 0.0607 | 9.5550     |
| g_Atopobium     | CardioEmbolicStroke | Inverse variance weighted | 3  | 0.9524 | 0.5654 | 1.6042     | 0.8546 | 0.1380  | 1.0176 | 0.9142 | 3.5193  | 0.0607 | 9.5550     |
| g_Atopobium     | CardioEmbolicStroke | Simple mode               | 3  | 0.6938 | 0.3283 | 1.4664     | 0.4394 | 0.1380  | 1.0176 | 0.9142 | 3.5193  | 0.0607 | 9.5550     |
| g_Atopobium     | CardioEmbolicStroke | Weighted mode             | 3  | 0.7000 | 0.3157 | 1.5521     | 0.4726 | 0.1380  | 1.0176 | 0.9142 | 3.5193  | 0.0607 | 9.5550     |
| g_Atopobium     | IschemicStroke      | MR Egger                  | 13 | 1.0278 | 0.9629 | 1.0971     | 0.4270 | -0.0178 | 0.0121 | 0.1693 | 15.0735 | 0.2374 | -45.1248   |
| g_Atopobium     | IschemicStroke      | Weighted median           | 13 | 0.9913 | 0.9382 | 1.0473     | 0.7549 | -0.0178 | 0.0121 | 0.1693 | 15.0735 | 0.2374 | -45.1248   |
| g_Atopobium     | IschemicStroke      | Inverse variance weighted | 13 | 0.9891 | 0.9481 | 1.0320     | 0.6138 | -0.0178 | 0.0121 | 0.1693 | 15.0735 | 0.2374 | -45.1248   |
| g_Atopobium     | IschemicStroke      | Simple mode               | 13 | 0.9700 | 0.8865 | 1.0614     | 0.5198 | -0.0178 | 0.0121 | 0.1693 | 15.0735 | 0.2374 | -45.1248   |
| g_Atopobium     | IschemicStroke      | Weighted mode             | 13 | 0.9762 | 0.9106 | 1.0465     | 0.5096 | -0.0178 | 0.0121 | 0.1693 | 15.0735 | 0.2374 | -45.1248   |
| g_Atopobium     | LargeArteryStroke   | MR Egger                  | 7  | 0.9044 | 0.6570 | 1.2450     | 0.5647 | 0.0164  | 0.0447 | 0.7284 | 3.7524  | 0.5856 | -426.1699  |
| g_Atopobium     | LargeArteryStroke   | Weighted median           | 7  | 0.9711 | 0.7794 | 1.2099     | 0.7939 | 0.0164  | 0.0447 | 0.7284 | 3.7524  | 0.5856 | -426.1699  |
| g_Atopobium     | LargeArteryStroke   | Inverse variance weighted | 7  | 0.9513 | 0.8017 | 1.1289     | 0.5676 | 0.0164  | 0.0447 | 0.7284 | 3.7524  | 0.5856 | -426.1699  |
| g_Atopobium     | LargeArteryStroke   | Simple mode               | 7  | 0.9988 | 0.7179 | 1.3896     | 0.9945 | 0.0164  | 0.0447 | 0.7284 | 3.7524  | 0.5856 | -426.1699  |
| g_Atopobium     | LargeArteryStroke   | Weighted mode             | 7  | 0.9972 | 0.7470 | 1.3312     | 0.9855 | 0.0164  | 0.0447 | 0.7284 | 3.7524  | 0.5856 | -426.1699  |
| g_Atopobium     | SmallVesselStroke   | MR Egger                  | 7  | 1.1500 | 0.9608 | 1.3764     | 0.1879 | -0.0541 | 0.0252 | 0.0843 | 8.1282  | 0.2289 | -523.3082  |
| g_Atopobium     | SmallVesselStroke   | Weighted median           | 7  | 1.0389 | 0.9097 | 1.1865     | 0.5728 | -0.0541 | 0.0252 | 0.0843 | 8.1282  | 0.2289 | -523.3082  |
| g_Atopobium     | SmallVesselStroke   | Inverse variance weighted | 7  | 0.9735 | 0.8706 | 1.0884     | 0.6367 | -0.0541 | 0.0252 | 0.0843 | 8.1282  | 0.2289 | -523.3082  |
| g_Atopobium     | SmallVesselStroke   | Simple mode               | 7  | 1.0400 | 0.8719 | 1.2406     | 0.6781 | -0.0541 | 0.0252 | 0.0843 | 8.1282  | 0.2289 | -523.3082  |
| g_Atopobium     | SmallVesselStroke   | Weighted mode             | 7  | 1.0492 | 0.9070 | 1.2136     | 0.5419 | -0.0541 | 0.0252 | 0.0843 | 8.1282  | 0.2289 | -523.3082  |
| g_Atopobium     | Stroke              | MR Egger                  | 8  | 1.0152 | 0.9291 | 1.1092     | 0.7507 | -0.0169 | 0.0121 | 0.2127 | 4.4139  | 0.7311 | -1055.0322 |
| g_Atopobium     | Stroke              | Weighted median           | 8  | 0.9612 | 0.9044 | 1.0217     | 0.2037 | -0.0169 | 0.0121 | 0.2127 | 4.4139  | 0.7311 | -1055.0322 |
| g_Atopobium     | Stroke              | Inverse variance weighted | 8  | 0.9614 | 0.9194 | 1.0054     | 0.0844 | -0.0169 | 0.0121 | 0.2127 | 4.4139  | 0.7311 | -1055.0322 |
| g_Atopobium     | Stroke              | Simple mode               | 8  | 0.9254 | 0.8455 | 1.0128     | 0.1363 | -0.0169 | 0.0121 | 0.2127 | 4.4139  | 0.7311 | -1055.0322 |
| g_Atopobium     | Stroke              | Weighted mode             | 8  | 0.9348 | 0.8583 | 1.0180     | 0.1650 | -0.0169 | 0.0121 | 0.2127 | 4.4139  | 0.7311 | -1055.0322 |
| g_Bacteroides   | CardioEmbolicStroke | MR Egger                  | 9  | 0.9488 | 0.6896 | 1.3054     | 0.7563 | -0.0245 | 0.0510 | 0.6461 | 13.1575 | 0.0684 | -71.8656   |
| g_Bacteroides   | CardioEmbolicStroke | Weighted median           | 9  | 1.0474 | 0.8460 | 1.2966     | 0.6710 | -0.0245 | 0.0510 | 0.6461 | 13.1575 | 0.0684 | -71.8656   |
| g_Bacteroides   | CardioEmbolicStroke | Inverse variance weighted | 9  | 0.8923 | 0.7400 | 1.0760     | 0.2327 | -0.0245 | 0.0510 | 0.6461 | 13.1575 | 0.0684 | -71.8656   |
| g_Bacteroides   | CardioEmbolicStroke | Simple mode               | 9  | 1.0272 | 0.6824 | 1.5461     | 0.9010 | -0.0245 | 0.0510 | 0.6461 | 13.1575 | 0.0684 | -71.8656   |
| g_Bacteroides   | CardioEmbolicStroke | Weighted mode             | 9  | 1.0475 | 0.8587 | 1.2778     | 0.6593 | -0.0245 | 0.0510 | 0.6461 | 13.1575 | 0.0684 | -71.8656   |
| g_Bacteroides   | IschemicStroke      | MR Egger                  | 21 | 0.9987 | 0.9566 | 1.0428     | 0.9550 | -0.0037 | 0.0079 | 0.6404 | 15.7697 | 0.6726 | -73.3425   |
| g_Bacteroides   | IschemicStroke      | Weighted median           | 21 | 1.0058 | 0.9693 | 1.0436     | 0.7593 | -0.0037 | 0.0079 | 0.6404 | 15.7697 | 0.6726 | -73.3425   |
| g_Bacteroides   | IschemicStroke      | Inverse variance weighted | 21 | 0.9904 | 0.9652 | 1.0162     | 0.4624 | -0.0037 | 0.0079 | 0.6404 | 15.7697 | 0.6726 | -73.3425   |
| g_Bacteroides   | IschemicStroke      | Simple mode               | 21 | 1.0101 | 0.9508 | 1.0731     | 0.7481 | -0.0037 | 0.0079 | 0.6404 | 15.7697 | 0.6726 | -73.3425   |
| g_Bacteroides   | IschemicStroke      | Weighted mode             | 21 | 1.0002 | 0.9593 | 1.0429     | 0.9913 | -0.0037 | 0.0079 | 0.6404 | 15.7697 | 0.6726 | -73.3425   |
| g_Bacteroides   | LargeArteryStroke   | MR Egger                  | 16 | 0.8919 | 0.7554 | 1.0530     | 0.1982 | 0.0242  | 0.0296 | 0.4278 | 18.4538 | 0.1869 | -13.1304   |
| g_Bacteroides   | LargeArteryStroke   | Weighted median           | 16 | 1.0191 | 0.8897 | 1.1673     | 0.7849 | 0.0242  | 0.0296 | 0.4278 | 18.4538 | 0.1869 | -13.1304   |
| g_Bacteroides   | LargeArteryStroke   | Inverse variance weighted | 16 | 0.9420 | 0.8519 | 1.0416     | 0.2441 | 0.0242  | 0.0296 | 0.4278 | 18.4538 | 0.1869 | -13.1304   |
| g_Bacteroides   | LargeArteryStroke   | Simple mode               | 16 | 1.0851 | 0.8805 | 1.3372     | 0.4557 | 0.0242  | 0.0296 | 0.4278 | 18.4538 | 0.1869 | -13.1304   |
| g_Bacteroides   | LargeArteryStroke   | Weighted mode             | 16 | 1.0383 | 0.9096 | 1.1852     | 0.5858 | 0.0242  | 0.0296 | 0.4278 | 18.4538 | 0.1869 | -13.1304   |
| g_Bacteroides   | SmallVesselStroke   | MR Egger                  | 17 | 1.0377 | 0.9573 | 1.1249     | 0.3827 | -0.0032 | 0.0143 | 0.8261 | 13.5101 | 0.5630 | -37.8795   |

|               |                     |                           |    |        |        |        |        |         |        |        |         |        |           |
|---------------|---------------------|---------------------------|----|--------|--------|--------|--------|---------|--------|--------|---------|--------|-----------|
| g_Bacteroides | SmallVesselStroke   | Weighted median           | 17 | 0.9894 | 0.9183 | 1.0659 | 0.7786 | -0.0032 | 0.0143 | 0.8261 | 13.5101 | 0.5630 | -37.8795  |
| g_Bacteroides | SmallVesselStroke   | Inverse variance weighted | 17 | 1.0302 | 0.9807 | 1.0821 | 0.2361 | -0.0032 | 0.0143 | 0.8261 | 13.5101 | 0.5630 | -37.8795  |
| g_Bacteroides | SmallVesselStroke   | Simple mode               | 17 | 0.9824 | 0.8756 | 1.1022 | 0.7658 | -0.0032 | 0.0143 | 0.8261 | 13.5101 | 0.5630 | -37.8795  |
| g_Bacteroides | SmallVesselStroke   | Weighted mode             | 17 | 0.9906 | 0.9210 | 1.0655 | 0.8027 | -0.0032 | 0.0143 | 0.8261 | 13.5101 | 0.5630 | -37.8795  |
| g_Bacteroides | Stroke              | MR Egger                  | 20 | 1.0320 | 0.9639 | 1.1049 | 0.3772 | -0.0128 | 0.0099 | 0.2136 | 25.5720 | 0.1426 | -130.9162 |
| g_Bacteroides | Stroke              | Weighted median           | 20 | 0.9739 | 0.9313 | 1.0184 | 0.2453 | -0.0128 | 0.0099 | 0.2136 | 25.5720 | 0.1426 | -130.9162 |
| g_Bacteroides | Stroke              | Inverse variance weighted | 20 | 0.9921 | 0.9599 | 1.0253 | 0.6357 | -0.0128 | 0.0099 | 0.2136 | 25.5720 | 0.1426 | -130.9162 |
| g_Bacteroides | Stroke              | Simple mode               | 20 | 0.9551 | 0.8827 | 1.0335 | 0.2678 | -0.0128 | 0.0099 | 0.2136 | 25.5720 | 0.1426 | -130.9162 |
| g_Bacteroides | Stroke              | Weighted mode             | 20 | 0.9678 | 0.9137 | 1.0251 | 0.2783 | -0.0128 | 0.0099 | 0.2136 | 25.5720 | 0.1426 | -130.9162 |
| g_Blautia     | CardioEmbolicStroke | MR Egger                  | 10 | 0.7271 | 0.3134 | 1.6871 | 0.4793 | 0.0503  | 0.0708 | 0.4977 | 5.9762  | 0.6499 | 31.3429   |
| g_Blautia     | CardioEmbolicStroke | Weighted median           | 10 | 1.0221 | 0.7208 | 1.4492 | 0.9025 | 0.0503  | 0.0708 | 0.4977 | 5.9762  | 0.6499 | 31.3429   |
| g_Blautia     | CardioEmbolicStroke | Inverse variance weighted | 10 | 0.9712 | 0.7447 | 1.2666 | 0.8293 | 0.0503  | 0.0708 | 0.4977 | 5.9762  | 0.6499 | 31.3429   |
| g_Blautia     | CardioEmbolicStroke | Simple mode               | 10 | 1.0838 | 0.5887 | 1.9955 | 0.8018 | 0.0503  | 0.0708 | 0.4977 | 5.9762  | 0.6499 | 31.3429   |
| g_Blautia     | CardioEmbolicStroke | Weighted mode             | 10 | 1.0736 | 0.5796 | 1.9886 | 0.8264 | 0.0503  | 0.0708 | 0.4977 | 5.9762  | 0.6499 | 31.3429   |
| g_Blautia     | IschemicStroke      | MR Egger                  | 19 | 1.0101 | 0.9405 | 1.0850 | 0.7854 | 0.0059  | 0.0087 | 0.5032 | 14.6467 | 0.6209 | -121.6157 |
| g_Blautia     | IschemicStroke      | Weighted median           | 19 | 1.0261 | 0.9696 | 1.0860 | 0.3727 | 0.0059  | 0.0087 | 0.5032 | 14.6467 | 0.6209 | -121.6157 |
| g_Blautia     | IschemicStroke      | Inverse variance weighted | 19 | 1.0312 | 0.9906 | 1.0734 | 0.1339 | 0.0059  | 0.0087 | 0.5032 | 14.6467 | 0.6209 | -121.6157 |
| g_Blautia     | IschemicStroke      | Simple mode               | 19 | 1.0238 | 0.9406 | 1.1142 | 0.5934 | 0.0059  | 0.0087 | 0.5032 | 14.6467 | 0.6209 | -121.6157 |
| g_Blautia     | IschemicStroke      | Weighted mode             | 19 | 1.0184 | 0.9456 | 1.0968 | 0.6353 | 0.0059  | 0.0087 | 0.5032 | 14.6467 | 0.6209 | -121.6157 |
| g_Blautia     | LargeArteryStroke   | MR Egger                  | 13 | 1.1617 | 0.8029 | 1.6810 | 0.4432 | -0.0372 | 0.0363 | 0.3278 | 6.5376  | 0.8866 | 6443.5509 |
| g_Blautia     | LargeArteryStroke   | Weighted median           | 13 | 1.0119 | 0.8053 | 1.2714 | 0.9193 | -0.0372 | 0.0363 | 0.3278 | 6.5376  | 0.8866 | 6443.5509 |
| g_Blautia     | LargeArteryStroke   | Inverse variance weighted | 13 | 0.9773 | 0.8290 | 1.1522 | 0.7850 | -0.0372 | 0.0363 | 0.3278 | 6.5376  | 0.8866 | 6443.5509 |
| g_Blautia     | LargeArteryStroke   | Simple mode               | 13 | 1.1422 | 0.7740 | 1.6855 | 0.5159 | -0.0372 | 0.0363 | 0.3278 | 6.5376  | 0.8866 | 6443.5509 |
| g_Blautia     | LargeArteryStroke   | Weighted mode             | 13 | 1.0601 | 0.7837 | 1.4340 | 0.7115 | -0.0372 | 0.0363 | 0.3278 | 6.5376  | 0.8866 | 6443.5509 |
| g_Blautia     | SmallVesselStroke   | MR Egger                  | 15 | 1.0659 | 0.9084 | 1.2508 | 0.4479 | -0.0017 | 0.0173 | 0.9223 | 8.6940  | 0.7956 | -219.1897 |
| g_Blautia     | SmallVesselStroke   | Weighted median           | 15 | 1.0196 | 0.9125 | 1.1392 | 0.7320 | -0.0017 | 0.0173 | 0.9223 | 8.6940  | 0.7956 | -219.1897 |
| g_Blautia     | SmallVesselStroke   | Inverse variance weighted | 15 | 1.0585 | 0.9748 | 1.1495 | 0.1762 | -0.0017 | 0.0173 | 0.9223 | 8.6940  | 0.7956 | -219.1897 |
| g_Blautia     | SmallVesselStroke   | Simple mode               | 15 | 1.0395 | 0.8615 | 1.2542 | 0.6923 | -0.0017 | 0.0173 | 0.9223 | 8.6940  | 0.7956 | -219.1897 |
| g_Blautia     | SmallVesselStroke   | Weighted mode             | 15 | 1.0236 | 0.8728 | 1.2003 | 0.7788 | -0.0017 | 0.0173 | 0.9223 | 8.6940  | 0.7956 | -219.1897 |
| g_Blautia     | Stroke              | MR Egger                  | 17 | 1.0647 | 0.9718 | 1.1665 | 0.1983 | -0.0056 | 0.0094 | 0.5642 | 19.5122 | 0.1915 | -336.4524 |
| g_Blautia     | Stroke              | Weighted median           | 17 | 1.0342 | 0.9802 | 1.0912 | 0.2185 | -0.0056 | 0.0094 | 0.5642 | 19.5122 | 0.1915 | -336.4524 |
| g_Blautia     | Stroke              | Inverse variance weighted | 17 | 1.0395 | 0.9951 | 1.0858 | 0.0817 | -0.0056 | 0.0094 | 0.5642 | 19.5122 | 0.1915 | -336.4524 |
| g_Blautia     | Stroke              | Simple mode               | 17 | 1.0309 | 0.9485 | 1.1204 | 0.4845 | -0.0056 | 0.0094 | 0.5642 | 19.5122 | 0.1915 | -336.4524 |
| g_Blautia     | Stroke              | Weighted mode             | 17 | 1.0309 | 0.9594 | 1.1077 | 0.4190 | -0.0056 | 0.0094 | 0.5642 | 19.5122 | 0.1915 | -336.4524 |
| g_Citrobacter | CardioEmbolicStroke | MR Egger                  | 6  | 0.8578 | 0.2997 | 2.4553 | 0.7892 | 0.0388  | 0.2268 | 0.8726 | 10.7955 | 0.0290 | -618.2092 |
| g_Citrobacter | CardioEmbolicStroke | Weighted median           | 6  | 0.9623 | 0.8093 | 1.1443 | 0.6637 | 0.0388  | 0.2268 | 0.8726 | 10.7955 | 0.0290 | -618.2092 |
| g_Citrobacter | CardioEmbolicStroke | Inverse variance weighted | 6  | 0.9388 | 0.7924 | 1.1122 | 0.4652 | 0.0388  | 0.2268 | 0.8726 | 10.7955 | 0.0290 | -618.2092 |
| g_Citrobacter | CardioEmbolicStroke | Simple mode               | 6  | 0.7929 | 0.5989 | 1.0498 | 0.1660 | 0.0388  | 0.2268 | 0.8726 | 10.7955 | 0.0290 | -618.2092 |
| g_Citrobacter | CardioEmbolicStroke | Weighted mode             | 6  | 0.8022 | 0.5974 | 1.0772 | 0.2027 | 0.0388  | 0.2268 | 0.8726 | 10.7955 | 0.0290 | -618.2092 |
| g_Citrobacter | IschemicStroke      | MR Egger                  | 13 | 1.0073 | 0.9713 | 1.0446 | 0.7036 | -0.0023 | 0.0106 | 0.8346 | 10.7423 | 0.4651 | -67.9959  |
| g_Citrobacter | IschemicStroke      | Weighted median           | 13 | 1.0026 | 0.9785 | 1.0274 | 0.8341 | -0.0023 | 0.0106 | 0.8346 | 10.7423 | 0.4651 | -67.9959  |
| g_Citrobacter | IschemicStroke      | Inverse variance weighted | 13 | 1.0038 | 0.9864 | 1.0214 | 0.6722 | -0.0023 | 0.0106 | 0.8346 | 10.7423 | 0.4651 | -67.9959  |
| g_Citrobacter | IschemicStroke      | Simple mode               | 13 | 1.0039 | 0.9651 | 1.0443 | 0.8503 | -0.0023 | 0.0106 | 0.8346 | 10.7423 | 0.4651 | -67.9959  |
| g_Citrobacter | IschemicStroke      | Weighted mode             | 13 | 1.0053 | 0.9685 | 1.0434 | 0.7860 | -0.0023 | 0.0106 | 0.8346 | 10.7423 | 0.4651 | -67.9959  |
| g_Citrobacter | LargeArteryStroke   | MR Egger                  | 11 | 1.0059 | 0.8323 | 1.2158 | 0.9527 | 0.0268  | 0.0500 | 0.6050 | 11.7674 | 0.2267 | -14.7329  |
| g_Citrobacter | LargeArteryStroke   | Weighted median           | 11 | 1.0819 | 0.9855 | 1.1878 | 0.0981 | 0.0268  | 0.0500 | 0.6050 | 11.7674 | 0.2267 | -14.7329  |
| g_Citrobacter | LargeArteryStroke   | Inverse variance weighted | 11 | 1.0550 | 0.9816 | 1.1338 | 0.1457 | 0.0268  | 0.0500 | 0.6050 | 11.7674 | 0.2267 | -14.7329  |
| g_Citrobacter | LargeArteryStroke   | Simple mode               | 11 | 1.0961 | 0.9513 | 1.2630 | 0.2329 | 0.0268  | 0.0500 | 0.6050 | 11.7674 | 0.2267 | -14.7329  |
| g_Citrobacter | LargeArteryStroke   | Weighted mode             | 11 | 1.0893 | 0.9660 | 1.2285 | 0.1930 | 0.0268  | 0.0500 | 0.6050 | 11.7674 | 0.2267 | -14.7329  |
| g_Citrobacter | SmallVesselStroke   | MR Egger                  | 11 | 0.9631 | 0.8789 | 1.0553 | 0.4409 | 0.0173  | 0.0242 | 0.4918 | 8.9868  | 0.4385 | -52.5182  |
| g_Citrobacter | SmallVesselStroke   | Weighted median           | 11 | 0.9739 | 0.9272 | 1.0231 | 0.2929 | 0.0173  | 0.0242 | 0.4918 | 8.9868  | 0.4385 | -52.5182  |
| g_Citrobacter | SmallVesselStroke   | Inverse variance weighted | 11 | 0.9931 | 0.9577 | 1.0298 | 0.7082 | 0.0173  | 0.0242 | 0.4918 | 8.9868  | 0.4385 | -52.5182  |
| g_Citrobacter | SmallVesselStroke   | Simple mode               | 11 | 0.9572 | 0.8913 | 1.0280 | 0.2576 | 0.0173  | 0.0242 | 0.4918 | 8.9868  | 0.4385 | -52.5182  |

|               |                     |                           |    |        |        |        |        |         |        |        |         |        |           |
|---------------|---------------------|---------------------------|----|--------|--------|--------|--------|---------|--------|--------|---------|--------|-----------|
| g_Citrobacter | SmallVesselStroke   | Weighted mode             | 11 | 0.9594 | 0.8952 | 1.0282 | 0.2678 | 0.0173  | 0.0242 | 0.4918 | 8.9868  | 0.4385 | -52.5182  |
| g_Citrobacter | Stroke              | MR Egger                  | 13 | 0.9939 | 0.9529 | 1.0367 | 0.7814 | 0.0034  | 0.0111 | 0.7659 | 7.4151  | 0.7645 | -60.0820  |
| g_Citrobacter | Stroke              | Weighted median           | 13 | 1.0004 | 0.9787 | 1.0227 | 0.9688 | 0.0034  | 0.0111 | 0.7659 | 7.4151  | 0.7645 | -60.0820  |
| g_Citrobacter | Stroke              | Inverse variance weighted | 13 | 0.9999 | 0.9837 | 1.0165 | 0.9933 | 0.0034  | 0.0111 | 0.7659 | 7.4151  | 0.7645 | -60.0820  |
| g_Citrobacter | Stroke              | Simple mode               | 13 | 1.0105 | 0.9777 | 1.0444 | 0.5450 | 0.0034  | 0.0111 | 0.7659 | 7.4151  | 0.7645 | -60.0820  |
| g_Citrobacter | Stroke              | Weighted mode             | 13 | 1.0072 | 0.9770 | 1.0383 | 0.6539 | 0.0034  | 0.0111 | 0.7659 | 7.4151  | 0.7645 | -60.0820  |
| g_Clostridium | CardioEmbolicStroke | MR Egger                  | 6  | 0.4561 | 0.1432 | 1.4528 | 0.2549 | 0.1120  | 0.0918 | 0.2897 | 7.5841  | 0.1807 | 10.3348   |
| g_Clostridium | CardioEmbolicStroke | Weighted median           | 6  | 0.7702 | 0.4796 | 1.2369 | 0.2801 | 0.1120  | 0.0918 | 0.2897 | 7.5841  | 0.1807 | 10.3348   |
| g_Clostridium | CardioEmbolicStroke | Inverse variance weighted | 6  | 0.8970 | 0.5895 | 1.3650 | 0.6118 | 0.1120  | 0.0918 | 0.2897 | 7.5841  | 0.1807 | 10.3348   |
| g_Clostridium | CardioEmbolicStroke | Simple mode               | 6  | 0.7407 | 0.3340 | 1.6426 | 0.4933 | 0.1120  | 0.0918 | 0.2897 | 7.5841  | 0.1807 | 10.3348   |
| g_Clostridium | CardioEmbolicStroke | Weighted mode             | 6  | 0.7108 | 0.3569 | 1.4155 | 0.3760 | 0.1120  | 0.0918 | 0.2897 | 7.5841  | 0.1807 | 10.3348   |
| g_Clostridium | IschemicStroke      | MR Egger                  | 13 | 1.0563 | 0.9441 | 1.1817 | 0.3595 | -0.0048 | 0.0134 | 0.7273 | 18.0430 | 0.0806 | -457.0068 |
| g_Clostridium | IschemicStroke      | Weighted median           | 13 | 1.0513 | 0.9811 | 1.1265 | 0.1557 | -0.0048 | 0.0134 | 0.7273 | 18.0430 | 0.0806 | -457.0068 |
| g_Clostridium | IschemicStroke      | Inverse variance weighted | 13 | 1.0383 | 0.9789 | 1.1013 | 0.2115 | -0.0048 | 0.0134 | 0.7273 | 18.0430 | 0.0806 | -457.0068 |
| g_Clostridium | IschemicStroke      | Simple mode               | 13 | 1.0691 | 0.9395 | 1.2165 | 0.3309 | -0.0048 | 0.0134 | 0.7273 | 18.0430 | 0.0806 | -457.0068 |
| g_Clostridium | IschemicStroke      | Weighted mode             | 13 | 1.0488 | 0.9515 | 1.1562 | 0.3562 | -0.0048 | 0.0134 | 0.7273 | 18.0430 | 0.0806 | -457.0068 |
| g_Clostridium | LargeArteryStroke   | MR Egger                  | 9  | 1.1934 | 0.7947 | 1.7919 | 0.4222 | -0.0448 | 0.0436 | 0.3388 | 11.7991 | 0.1604 | 3566.5285 |
| g_Clostridium | LargeArteryStroke   | Weighted median           | 9  | 0.8932 | 0.6826 | 1.1688 | 0.4106 | -0.0448 | 0.0436 | 0.3388 | 11.7991 | 0.1604 | 3566.5285 |
| g_Clostridium | LargeArteryStroke   | Inverse variance weighted | 9  | 0.9968 | 0.8017 | 1.2395 | 0.9771 | -0.0448 | 0.0436 | 0.3388 | 11.7991 | 0.1604 | 3566.5285 |
| g_Clostridium | LargeArteryStroke   | Simple mode               | 9  | 0.8535 | 0.5422 | 1.3437 | 0.5133 | -0.0448 | 0.0436 | 0.3388 | 11.7991 | 0.1604 | 3566.5285 |
| g_Clostridium | LargeArteryStroke   | Weighted mode             | 9  | 0.8372 | 0.5380 | 1.3028 | 0.4536 | -0.0448 | 0.0436 | 0.3388 | 11.7991 | 0.1604 | 3566.5285 |
| g_Clostridium | SmallVesselStroke   | MR Egger                  | 11 | 1.0336 | 0.8756 | 1.2201 | 0.7054 | -0.0050 | 0.0191 | 0.7982 | 8.5041  | 0.4842 | -926.6606 |
| g_Clostridium | SmallVesselStroke   | Weighted median           | 11 | 0.9866 | 0.8667 | 1.1231 | 0.8384 | -0.0050 | 0.0191 | 0.7982 | 8.5041  | 0.4842 | -926.6606 |
| g_Clostridium | SmallVesselStroke   | Inverse variance weighted | 11 | 1.0145 | 0.9265 | 1.1108 | 0.7561 | -0.0050 | 0.0191 | 0.7982 | 8.5041  | 0.4842 | -926.6606 |
| g_Clostridium | SmallVesselStroke   | Simple mode               | 11 | 0.9840 | 0.8056 | 1.2018 | 0.8772 | -0.0050 | 0.0191 | 0.7982 | 8.5041  | 0.4842 | -926.6606 |
| g_Clostridium | SmallVesselStroke   | Weighted mode             | 11 | 0.9501 | 0.7974 | 1.1321 | 0.5799 | -0.0050 | 0.0191 | 0.7982 | 8.5041  | 0.4842 | -926.6606 |
| g_Clostridium | Stroke              | MR Egger                  | 16 | 1.0292 | 0.9308 | 1.1380 | 0.5840 | -0.0024 | 0.0120 | 0.8453 | 26.3862 | 0.0231 | -91.4914  |
| g_Clostridium | Stroke              | Weighted median           | 16 | 1.0473 | 0.9853 | 1.1133 | 0.1378 | -0.0024 | 0.0120 | 0.8453 | 26.3862 | 0.0231 | -91.4914  |
| g_Clostridium | Stroke              | Inverse variance weighted | 16 | 1.0204 | 0.9673 | 1.0765 | 0.4586 | -0.0024 | 0.0120 | 0.8453 | 26.3862 | 0.0231 | -91.4914  |
| g_Clostridium | Stroke              | Simple mode               | 16 | 1.0744 | 0.9559 | 1.2076 | 0.2472 | -0.0024 | 0.0120 | 0.8453 | 26.3862 | 0.0231 | -91.4914  |
| g_Clostridium | Stroke              | Weighted mode             | 16 | 1.0659 | 0.9571 | 1.1871 | 0.2634 | -0.0024 | 0.0120 | 0.8453 | 26.3862 | 0.0231 | -91.4914  |
| g_Collinsella | CardioEmbolicStroke | MR Egger                  | 10 | 0.9402 | 0.5771 | 1.5318 | 0.8106 | 0.0411  | 0.1151 | 0.7301 | 13.5152 | 0.0953 | -84.6011  |
| g_Collinsella | CardioEmbolicStroke | Weighted median           | 10 | 1.0202 | 0.9056 | 1.1494 | 0.7416 | 0.0411  | 0.1151 | 0.7301 | 13.5152 | 0.0953 | -84.6011  |
| g_Collinsella | CardioEmbolicStroke | Inverse variance weighted | 10 | 1.0256 | 0.9284 | 1.1328 | 0.6190 | 0.0411  | 0.1151 | 0.7301 | 13.5152 | 0.0953 | -84.6011  |
| g_Collinsella | CardioEmbolicStroke | Simple mode               | 10 | 1.0022 | 0.8340 | 1.2043 | 0.9821 | 0.0411  | 0.1151 | 0.7301 | 13.5152 | 0.0953 | -84.6011  |
| g_Collinsella | CardioEmbolicStroke | Weighted mode             | 10 | 1.0022 | 0.8445 | 1.1893 | 0.9808 | 0.0411  | 0.1151 | 0.7301 | 13.5152 | 0.0953 | -84.6011  |
| g_Collinsella | IschemicStroke      | MR Egger                  | 14 | 1.0030 | 0.9335 | 1.0777 | 0.9357 | -0.0063 | 0.0173 | 0.7212 | 5.2578  | 0.9488 | -213.6618 |
| g_Collinsella | IschemicStroke      | Weighted median           | 14 | 0.9894 | 0.9675 | 1.0117 | 0.3491 | -0.0063 | 0.0173 | 0.7212 | 5.2578  | 0.9488 | -213.6618 |
| g_Collinsella | IschemicStroke      | Inverse variance weighted | 14 | 0.9900 | 0.9737 | 1.0067 | 0.2388 | -0.0063 | 0.0173 | 0.7212 | 5.2578  | 0.9488 | -213.6618 |
| g_Collinsella | IschemicStroke      | Simple mode               | 14 | 0.9930 | 0.9582 | 1.0292 | 0.7078 | -0.0063 | 0.0173 | 0.7212 | 5.2578  | 0.9488 | -213.6618 |
| g_Collinsella | IschemicStroke      | Weighted mode             | 14 | 0.9994 | 0.9692 | 1.0306 | 0.9710 | -0.0063 | 0.0173 | 0.7212 | 5.2578  | 0.9488 | -213.6618 |
| g_Collinsella | LargeArteryStroke   | MR Egger                  | 11 | 1.1344 | 0.8796 | 1.4630 | 0.3567 | -0.0658 | 0.0611 | 0.3097 | 4.6197  | 0.9151 | -123.1294 |
| g_Collinsella | LargeArteryStroke   | Weighted median           | 11 | 0.9635 | 0.8954 | 1.0369 | 0.3213 | -0.0658 | 0.0611 | 0.3097 | 4.6197  | 0.9151 | -123.1294 |
| g_Collinsella | LargeArteryStroke   | Inverse variance weighted | 11 | 0.9902 | 0.9339 | 1.0498 | 0.7408 | -0.0658 | 0.0611 | 0.3097 | 4.6197  | 0.9151 | -123.1294 |
| g_Collinsella | LargeArteryStroke   | Simple mode               | 11 | 0.9513 | 0.8393 | 1.0781 | 0.4522 | -0.0658 | 0.0611 | 0.3097 | 4.6197  | 0.9151 | -123.1294 |
| g_Collinsella | LargeArteryStroke   | Weighted mode             | 11 | 0.9534 | 0.8457 | 1.0749 | 0.4537 | -0.0658 | 0.0611 | 0.3097 | 4.6197  | 0.9151 | -123.1294 |
| g_Collinsella | SmallVesselStroke   | MR Egger                  | 11 | 0.9489 | 0.8239 | 1.0929 | 0.4853 | 0.0191  | 0.0340 | 0.5877 | 9.0783  | 0.4301 | -109.0950 |
| g_Collinsella | SmallVesselStroke   | Weighted median           | 11 | 0.9979 | 0.9549 | 1.0428 | 0.9253 | 0.0191  | 0.0340 | 0.5877 | 9.0783  | 0.4301 | -109.0950 |
| g_Collinsella | SmallVesselStroke   | Inverse variance weighted | 11 | 0.9871 | 0.9555 | 1.0197 | 0.4324 | 0.0191  | 0.0340 | 0.5877 | 9.0783  | 0.4301 | -109.0950 |
| g_Collinsella | SmallVesselStroke   | Simple mode               | 11 | 1.0007 | 0.9363 | 1.0696 | 0.9830 | 0.0191  | 0.0340 | 0.5877 | 9.0783  | 0.4301 | -109.0950 |
| g_Collinsella | SmallVesselStroke   | Weighted mode             | 11 | 0.9975 | 0.9371 | 1.0617 | 0.9382 | 0.0191  | 0.0340 | 0.5877 | 9.0783  | 0.4301 | -109.0950 |
| g_Collinsella | Stroke              | MR Egger                  | 14 | 0.9919 | 0.9338 | 1.0535 | 0.7948 | -0.0020 | 0.0146 | 0.8922 | 11.8981 | 0.4539 | -184.2146 |
| g_Collinsella | Stroke              | Weighted median           | 14 | 0.9885 | 0.9693 | 1.0082 | 0.2506 | -0.0020 | 0.0146 | 0.8922 | 11.8981 | 0.4539 | -184.2146 |

|                 |                     |                           |    |        |        |        |        |         |        |        |         |        |            |
|-----------------|---------------------|---------------------------|----|--------|--------|--------|--------|---------|--------|--------|---------|--------|------------|
| g_Collinsella   | Stroke              | Inverse variance weighted | 14 | 0.9878 | 0.9738 | 1.0019 | 0.0889 | -0.0020 | 0.0146 | 0.8922 | 11.8981 | 0.4539 | -184.2146  |
| g_Collinsella   | Stroke              | Simple mode               | 14 | 0.9922 | 0.9631 | 1.0223 | 0.6168 | -0.0020 | 0.0146 | 0.8922 | 11.8981 | 0.4539 | -184.2146  |
| g_Collinsella   | Stroke              | Weighted mode             | 14 | 0.9916 | 0.9625 | 1.0216 | 0.5889 | -0.0020 | 0.0146 | 0.8922 | 11.8981 | 0.4539 | -184.2146  |
| g_Coprobacillus | CardioEmbolicStroke | MR Egger                  | 10 | 1.1274 | 0.6678 | 1.9032 | 0.6655 | 0.0154  | 0.0711 | 0.8340 | 14.7225 | 0.0648 | 12726.1614 |
| g_Coprobacillus | CardioEmbolicStroke | Weighted median           | 10 | 1.1902 | 0.9598 | 1.4758 | 0.1126 | 0.0154  | 0.0711 | 0.8340 | 14.7225 | 0.0648 | 12726.1614 |
| g_Coprobacillus | CardioEmbolicStroke | Inverse variance weighted | 10 | 1.1895 | 0.9886 | 1.4312 | 0.0660 | 0.0154  | 0.0711 | 0.8340 | 14.7225 | 0.0648 | 12726.1614 |
| g_Coprobacillus | CardioEmbolicStroke | Simple mode               | 10 | 1.1590 | 0.8128 | 1.6526 | 0.4361 | 0.0154  | 0.0711 | 0.8340 | 14.7225 | 0.0648 | 12726.1614 |
| g_Coprobacillus | CardioEmbolicStroke | Weighted mode             | 10 | 1.1590 | 0.9248 | 1.4525 | 0.2322 | 0.0154  | 0.0711 | 0.8340 | 14.7225 | 0.0648 | 12726.1614 |
| g_Coprobacillus | IschemicStroke      | MR Egger                  | 15 | 1.0053 | 0.9449 | 1.0696 | 0.8691 | 0.0023  | 0.0095 | 0.8131 | 7.3338  | 0.8841 | -208.2954  |
| g_Coprobacillus | IschemicStroke      | Weighted median           | 15 | 1.0114 | 0.9710 | 1.0535 | 0.5863 | 0.0023  | 0.0095 | 0.8131 | 7.3338  | 0.8841 | -208.2954  |
| g_Coprobacillus | IschemicStroke      | Inverse variance weighted | 15 | 1.0121 | 0.9834 | 1.0417 | 0.4125 | 0.0023  | 0.0095 | 0.8131 | 7.3338  | 0.8841 | -208.2954  |
| g_Coprobacillus | IschemicStroke      | Simple mode               | 15 | 1.0235 | 0.9653 | 1.0851 | 0.4501 | 0.0023  | 0.0095 | 0.8131 | 7.3338  | 0.8841 | -208.2954  |
| g_Coprobacillus | IschemicStroke      | Weighted mode             | 15 | 1.0132 | 0.9630 | 1.0660 | 0.6214 | 0.0023  | 0.0095 | 0.8131 | 7.3338  | 0.8841 | -208.2954  |
| g_Coprobacillus | LargeArteryStroke   | MR Egger                  | 11 | 1.2168 | 0.9601 | 1.5422 | 0.1389 | -0.0593 | 0.0341 | 0.1161 | 8.5592  | 0.5744 | -419.8505  |
| g_Coprobacillus | LargeArteryStroke   | Weighted median           | 11 | 1.0449 | 0.9106 | 1.1991 | 0.5315 | -0.0593 | 0.0341 | 0.1161 | 8.5592  | 0.5744 | -419.8505  |
| g_Coprobacillus | LargeArteryStroke   | Inverse variance weighted | 11 | 1.0063 | 0.9093 | 1.1137 | 0.9033 | -0.0593 | 0.0341 | 0.1161 | 8.5592  | 0.5744 | -419.8505  |
| g_Coprobacillus | LargeArteryStroke   | Simple mode               | 11 | 1.0347 | 0.8128 | 1.3171 | 0.7875 | -0.0593 | 0.0341 | 0.1161 | 8.5592  | 0.5744 | -419.8505  |
| g_Coprobacillus | LargeArteryStroke   | Weighted mode             | 11 | 1.0800 | 0.8978 | 1.2991 | 0.4334 | -0.0593 | 0.0341 | 0.1161 | 8.5592  | 0.5744 | -419.8505  |
| g_Coprobacillus | SmallVesselStroke   | MR Egger                  | 12 | 0.8394 | 0.7376 | 0.9551 | 0.0240 | 0.0578  | 0.0188 | 0.0117 | 19.0146 | 0.0608 | -155.3083  |
| g_Coprobacillus | SmallVesselStroke   | Weighted median           | 12 | 0.9998 | 0.9185 | 1.0883 | 0.9960 | 0.0578  | 0.0188 | 0.0117 | 19.0146 | 0.0608 | -155.3083  |
| g_Coprobacillus | SmallVesselStroke   | Inverse variance weighted | 12 | 1.0081 | 0.9369 | 1.0847 | 0.8300 | 0.0578  | 0.0188 | 0.0117 | 19.0146 | 0.0608 | -155.3083  |
| g_Coprobacillus | SmallVesselStroke   | Simple mode               | 12 | 1.1206 | 0.9382 | 1.3384 | 0.2349 | 0.0578  | 0.0188 | 0.0117 | 19.0146 | 0.0608 | -155.3083  |
| g_Coprobacillus | SmallVesselStroke   | Weighted mode             | 12 | 0.9494 | 0.8415 | 0.0712 | 0.4173 | 0.0578  | 0.0188 | 0.0117 | 19.0146 | 0.0608 | -155.3083  |
| g_Coprobacillus | Stroke              | MR Egger                  | 14 | 0.9899 | 0.9373 | 1.0455 | 0.7226 | 0.0039  | 0.0082 | 0.6410 | 4.0319  | 0.9829 | -266.2600  |
| g_Coprobacillus | Stroke              | Weighted median           | 14 | 1.0076 | 0.9735 | 1.0429 | 0.6652 | 0.0039  | 0.0082 | 0.6410 | 4.0319  | 0.9829 | -266.2600  |
| g_Coprobacillus | Stroke              | Inverse variance weighted | 14 | 1.0017 | 0.9765 | 1.0274 | 0.8975 | 0.0039  | 0.0082 | 0.6410 | 4.0319  | 0.9829 | -266.2600  |
| g_Coprobacillus | Stroke              | Simple mode               | 14 | 1.0095 | 0.9556 | 1.0665 | 0.7410 | 0.0039  | 0.0082 | 0.6410 | 4.0319  | 0.9829 | -266.2600  |
| g_Coprobacillus | Stroke              | Weighted mode             | 14 | 1.0103 | 0.9648 | 1.0580 | 0.6705 | 0.0039  | 0.0082 | 0.6410 | 4.0319  | 0.9829 | -266.2600  |
| g_Coprococcus   | CardioEmbolicStroke | MR Egger                  | 9  | 0.6676 | 0.4980 | 0.8949 | 0.0305 | 0.0623  | 0.0395 | 0.1585 | 9.0631  | 0.3370 | -618.4727  |
| g_Coprococcus   | CardioEmbolicStroke | Weighted median           | 9  | 0.7059 | 0.5645 | 0.8828 | 0.0023 | 0.0623  | 0.0395 | 0.1585 | 9.0631  | 0.3370 | -618.4727  |
| g_Coprococcus   | CardioEmbolicStroke | Inverse variance weighted | 9  | 0.8157 | 0.6918 | 0.9618 | 0.0154 | 0.0623  | 0.0395 | 0.1585 | 9.0631  | 0.3370 | -618.4727  |
| g_Coprococcus   | CardioEmbolicStroke | Simple mode               | 9  | 0.6891 | 0.4573 | 1.0382 | 0.1128 | 0.0623  | 0.0395 | 0.1585 | 9.0631  | 0.3370 | -618.4727  |
| g_Coprococcus   | CardioEmbolicStroke | Weighted mode             | 9  | 0.7089 | 0.5375 | 0.9349 | 0.0408 | 0.0623  | 0.0395 | 0.1585 | 9.0631  | 0.3370 | -618.4727  |
| g_Coprococcus   | IschemicStroke      | MR Egger                  | 21 | 0.9593 | 0.9185 | 1.0020 | 0.0770 | 0.0081  | 0.0077 | 0.3052 | 16.8039 | 0.6657 | -45.4150   |
| g_Coprococcus   | IschemicStroke      | Weighted median           | 21 | 0.9634 | 0.9284 | 0.9997 | 0.0484 | 0.0081  | 0.0077 | 0.3052 | 16.8039 | 0.6657 | -45.4150   |
| g_Coprococcus   | IschemicStroke      | Inverse variance weighted | 21 | 0.9778 | 0.9535 | 1.0027 | 0.0806 | 0.0081  | 0.0077 | 0.3052 | 16.8039 | 0.6657 | -45.4150   |
| g_Coprococcus   | IschemicStroke      | Simple mode               | 21 | 0.9507 | 0.8968 | 1.0078 | 0.1048 | 0.0081  | 0.0077 | 0.3052 | 16.8039 | 0.6657 | -45.4150   |
| g_Coprococcus   | IschemicStroke      | Weighted mode             | 21 | 0.9601 | 0.9153 | 1.0071 | 0.1109 | 0.0081  | 0.0077 | 0.3052 | 16.8039 | 0.6657 | -45.4150   |
| g_Coprococcus   | LargeArteryStroke   | MR Egger                  | 15 | 0.9783 | 0.8229 | 1.1629 | 0.8071 | 0.0211  | 0.0269 | 0.4466 | 11.5892 | 0.5616 | -34.8884   |
| g_Coprococcus   | LargeArteryStroke   | Weighted median           | 15 | 1.0290 | 0.8997 | 1.1769 | 0.6761 | 0.0211  | 0.0269 | 0.4466 | 11.5892 | 0.5616 | -34.8884   |
| g_Coprococcus   | LargeArteryStroke   | Inverse variance weighted | 15 | 1.0367 | 0.9433 | 1.1393 | 0.4541 | 0.0211  | 0.0269 | 0.4466 | 11.5892 | 0.5616 | -34.8884   |
| g_Coprococcus   | LargeArteryStroke   | Simple mode               | 15 | 0.9635 | 0.7658 | 1.2123 | 0.7559 | 0.0211  | 0.0269 | 0.4466 | 11.5892 | 0.5616 | -34.8884   |
| g_Coprococcus   | LargeArteryStroke   | Weighted mode             | 15 | 0.9791 | 0.7918 | 1.2107 | 0.8482 | 0.0211  | 0.0269 | 0.4466 | 11.5892 | 0.5616 | -34.8884   |
| g_Coprococcus   | SmallVesselStroke   | MR Egger                  | 16 | 0.9032 | 0.8265 | 0.9871 | 0.0413 | 0.0184  | 0.0145 | 0.2252 | 15.5327 | 0.4138 | -26.5121   |
| g_Coprococcus   | SmallVesselStroke   | Weighted median           | 16 | 0.9394 | 0.8753 | 1.0082 | 0.0829 | 0.0184  | 0.0145 | 0.2252 | 15.5327 | 0.4138 | -26.5121   |
| g_Coprococcus   | SmallVesselStroke   | Inverse variance weighted | 16 | 0.9473 | 0.9005 | 0.9965 | 0.0360 | 0.0184  | 0.0145 | 0.2252 | 15.5327 | 0.4138 | -26.5121   |
| g_Coprococcus   | SmallVesselStroke   | Simple mode               | 16 | 0.9142 | 0.8169 | 1.0230 | 0.1388 | 0.0184  | 0.0145 | 0.2252 | 15.5327 | 0.4138 | -26.5121   |
| g_Coprococcus   | SmallVesselStroke   | Weighted mode             | 16 | 0.9270 | 0.8482 | 1.0131 | 0.1149 | 0.0184  | 0.0145 | 0.2252 | 15.5327 | 0.4138 | -26.5121   |
| g_Coprococcus   | Stroke              | MR Egger                  | 20 | 0.9685 | 0.9276 | 1.0113 | 0.1637 | 0.0048  | 0.0070 | 0.5047 | 17.4998 | 0.4890 | -60.9312   |
| g_Coprococcus   | Stroke              | Weighted median           | 20 | 0.9811 | 0.9479 | 1.0155 | 0.2775 | 0.0048  | 0.0070 | 0.5047 | 17.4998 | 0.4890 | -60.9312   |
| g_Coprococcus   | Stroke              | Inverse variance weighted | 20 | 0.9808 | 0.9579 | 1.0042 | 0.1065 | 0.0048  | 0.0070 | 0.5047 | 17.4998 | 0.4890 | -60.9312   |
| g_Coprococcus   | Stroke              | Simple mode               | 20 | 0.9808 | 0.9210 | 1.0444 | 0.5520 | 0.0048  | 0.0070 | 0.5047 | 17.4998 | 0.4890 | -60.9312   |
| g_Coprococcus   | Stroke              | Weighted mode             | 20 | 0.9730 | 0.9176 | 1.0318 | 0.3724 | 0.0048  | 0.0070 | 0.5047 | 17.4998 | 0.4890 | -60.9312   |

|                 |                     |                           |    |        |        |        |        |         |        |        |         |        |           |
|-----------------|---------------------|---------------------------|----|--------|--------|--------|--------|---------|--------|--------|---------|--------|-----------|
| g_Desulfovibrio | CardioEmbolicStroke | MR Egger                  | 7  | 0.9922 | 0.8224 | 1.1971 | 0.9383 | 0.0507  | 0.0695 | 0.4983 | 7.6084  | 0.1792 | -20.3598  |
| g_Desulfovibrio | CardioEmbolicStroke | Weighted median           | 7  | 1.0396 | 0.9349 | 1.1561 | 0.4731 | 0.0507  | 0.0695 | 0.4983 | 7.6084  | 0.1792 | -20.3598  |
| g_Desulfovibrio | CardioEmbolicStroke | Inverse variance weighted | 7  | 1.0544 | 0.9646 | 1.1526 | 0.2432 | 0.0507  | 0.0695 | 0.4983 | 7.6084  | 0.1792 | -20.3598  |
| g_Desulfovibrio | CardioEmbolicStroke | Simple mode               | 7  | 1.0720 | 0.9030 | 1.2727 | 0.4572 | 0.0507  | 0.0695 | 0.4983 | 7.6084  | 0.1792 | -20.3598  |
| g_Desulfovibrio | CardioEmbolicStroke | Weighted mode             | 7  | 1.0286 | 0.9101 | 1.1626 | 0.6673 | 0.0507  | 0.0695 | 0.4983 | 7.6084  | 0.1792 | -20.3598  |
| g_Desulfovibrio | IschemicStroke      | MR Egger                  | 13 | 0.9952 | 0.9695 | 1.0217 | 0.7274 | 0.0099  | 0.0116 | 0.4115 | 7.7391  | 0.7365 | -49.0790  |
| g_Desulfovibrio | IschemicStroke      | Weighted median           | 13 | 1.0139 | 0.9964 | 1.0316 | 0.1208 | 0.0099  | 0.0116 | 0.4115 | 7.7391  | 0.7365 | -49.0790  |
| g_Desulfovibrio | IschemicStroke      | Inverse variance weighted | 13 | 1.0051 | 0.9920 | 1.0184 | 0.4475 | 0.0099  | 0.0116 | 0.4115 | 7.7391  | 0.7365 | -49.0790  |
| g_Desulfovibrio | IschemicStroke      | Simple mode               | 13 | 1.0156 | 0.9870 | 1.0450 | 0.3093 | 0.0099  | 0.0116 | 0.4115 | 7.7391  | 0.7365 | -49.0790  |
| g_Desulfovibrio | IschemicStroke      | Weighted mode             | 13 | 1.0144 | 0.9850 | 1.0447 | 0.3582 | 0.0099  | 0.0116 | 0.4115 | 7.7391  | 0.7365 | -49.0790  |
| g_Desulfovibrio | LargeArteryStroke   | MR Egger                  | 11 | 0.9896 | 0.8967 | 1.0921 | 0.8397 | 0.0011  | 0.0426 | 0.9794 | 11.4118 | 0.2485 | -7.0950   |
| g_Desulfovibrio | LargeArteryStroke   | Weighted median           | 11 | 0.9722 | 0.9093 | 1.0395 | 0.4089 | 0.0011  | 0.0426 | 0.9794 | 11.4118 | 0.2485 | -7.0950   |
| g_Desulfovibrio | LargeArteryStroke   | Inverse variance weighted | 11 | 0.9907 | 0.9438 | 1.0400 | 0.7065 | 0.0011  | 0.0426 | 0.9794 | 11.4118 | 0.2485 | -7.0950   |
| g_Desulfovibrio | LargeArteryStroke   | Simple mode               | 11 | 0.9683 | 0.8590 | 1.0916 | 0.6101 | 0.0011  | 0.0426 | 0.9794 | 11.4118 | 0.2485 | -7.0950   |
| g_Desulfovibrio | LargeArteryStroke   | Weighted mode             | 11 | 0.9458 | 0.8533 | 1.0484 | 0.3137 | 0.0011  | 0.0426 | 0.9794 | 11.4118 | 0.2485 | -7.0950   |
| g_Desulfovibrio | SmallVesselStroke   | MR Egger                  | 11 | 0.9739 | 0.9276 | 1.0225 | 0.3143 | 0.0293  | 0.0210 | 0.1970 | 5.9587  | 0.8187 | -38.9336  |
| g_Desulfovibrio | SmallVesselStroke   | Weighted median           | 11 | 0.9988 | 0.9652 | 1.0335 | 0.9452 | 0.0293  | 0.0210 | 0.1970 | 5.9587  | 0.8187 | -38.9336  |
| g_Desulfovibrio | SmallVesselStroke   | Inverse variance weighted | 11 | 1.0031 | 0.9781 | 1.0288 | 0.8095 | 0.0293  | 0.0210 | 0.1970 | 5.9587  | 0.8187 | -38.9336  |
| g_Desulfovibrio | SmallVesselStroke   | Simple mode               | 11 | 0.9954 | 0.9481 | 1.0451 | 0.8571 | 0.0293  | 0.0210 | 0.1970 | 5.9587  | 0.8187 | -38.9336  |
| g_Desulfovibrio | SmallVesselStroke   | Weighted mode             | 11 | 0.9934 | 0.9506 | 1.0381 | 0.7732 | 0.0293  | 0.0210 | 0.1970 | 5.9587  | 0.8187 | -38.9336  |
| g_Desulfovibrio | Stroke              | MR Egger                  | 11 | 0.9886 | 0.9578 | 1.0204 | 0.4952 | 0.0148  | 0.0128 | 0.2796 | 15.4592 | 0.1162 | -53.6747  |
| g_Desulfovibrio | Stroke              | Weighted median           | 11 | 1.0048 | 0.9882 | 1.0217 | 0.5718 | 0.0148  | 0.0128 | 0.2796 | 15.4592 | 0.1162 | -53.6747  |
| g_Desulfovibrio | Stroke              | Inverse variance weighted | 11 | 1.0048 | 0.9894 | 1.0205 | 0.5401 | 0.0148  | 0.0128 | 0.2796 | 15.4592 | 0.1162 | -53.6747  |
| g_Desulfovibrio | Stroke              | Simple mode               | 11 | 1.0071 | 0.9816 | 1.0333 | 0.5982 | 0.0148  | 0.0128 | 0.2796 | 15.4592 | 0.1162 | -53.6747  |
| g_Desulfovibrio | Stroke              | Weighted mode             | 11 | 1.0016 | 0.9788 | 1.0248 | 0.8960 | 0.0148  | 0.0128 | 0.2796 | 15.4592 | 0.1162 | -53.6747  |
| g_Dorea         | CardioEmbolicStroke | MR Egger                  | 12 | 1.0043 | 0.5572 | 1.8103 | 0.9889 | 0.0091  | 0.0563 | 0.8744 | 12.1305 | 0.2764 | 63.3988   |
| g_Dorea         | CardioEmbolicStroke | Weighted median           | 12 | 0.9727 | 0.7400 | 1.2786 | 0.8427 | 0.0091  | 0.0563 | 0.8744 | 12.1305 | 0.2764 | 63.3988   |
| g_Dorea         | CardioEmbolicStroke | Inverse variance weighted | 12 | 1.0512 | 0.8616 | 1.2826 | 0.6228 | 0.0091  | 0.0563 | 0.8744 | 12.1305 | 0.2764 | 63.3988   |
| g_Dorea         | CardioEmbolicStroke | Simple mode               | 12 | 0.9841 | 0.6543 | 1.4800 | 0.9400 | 0.0091  | 0.0563 | 0.8744 | 12.1305 | 0.2764 | 63.3988   |
| g_Dorea         | CardioEmbolicStroke | Weighted mode             | 12 | 0.9513 | 0.6983 | 1.2960 | 0.7577 | 0.0091  | 0.0563 | 0.8744 | 12.1305 | 0.2764 | 63.3988   |
| g_Dorea         | IschemicStroke      | MR Egger                  | 17 | 1.0071 | 0.9408 | 1.0780 | 0.8420 | 0.0040  | 0.0080 | 0.6217 | 12.4944 | 0.6413 | -258.4896 |
| g_Dorea         | IschemicStroke      | Weighted median           | 17 | 1.0258 | 0.9771 | 1.0769 | 0.3051 | 0.0040  | 0.0080 | 0.6217 | 12.4944 | 0.6413 | -258.4896 |
| g_Dorea         | IschemicStroke      | Inverse variance weighted | 17 | 1.0224 | 0.9877 | 1.0582 | 0.2084 | 0.0040  | 0.0080 | 0.6217 | 12.4944 | 0.6413 | -258.4896 |
| g_Dorea         | IschemicStroke      | Simple mode               | 17 | 1.0303 | 0.9521 | 1.1149 | 0.4699 | 0.0040  | 0.0080 | 0.6217 | 12.4944 | 0.6413 | -258.4896 |
| g_Dorea         | IschemicStroke      | Weighted mode             | 17 | 1.0292 | 0.9669 | 1.0956 | 0.3797 | 0.0040  | 0.0080 | 0.6217 | 12.4944 | 0.6413 | -258.4896 |
| g_Dorea         | LargeArteryStroke   | MR Egger                  | 16 | 0.8914 | 0.7076 | 1.1230 | 0.3460 | 0.0414  | 0.0266 | 0.1410 | 15.2015 | 0.4370 | -91.4622  |
| g_Dorea         | LargeArteryStroke   | Weighted median           | 16 | 0.9724 | 0.8230 | 1.1489 | 0.7422 | 0.0414  | 0.0266 | 0.1410 | 15.2015 | 0.4370 | -91.4622  |
| g_Dorea         | LargeArteryStroke   | Inverse variance weighted | 16 | 1.0461 | 0.9329 | 1.1731 | 0.4407 | 0.0414  | 0.0266 | 0.1410 | 15.2015 | 0.4370 | -91.4622  |
| g_Dorea         | LargeArteryStroke   | Simple mode               | 16 | 1.1791 | 0.8962 | 1.5512 | 0.2575 | 0.0414  | 0.0266 | 0.1410 | 15.2015 | 0.4370 | -91.4622  |
| g_Dorea         | LargeArteryStroke   | Weighted mode             | 16 | 0.9659 | 0.7910 | 1.1795 | 0.7383 | 0.0414  | 0.0266 | 0.1410 | 15.2015 | 0.4370 | -91.4622  |
| g_Dorea         | SmallVesselStroke   | MR Egger                  | 16 | 1.1208 | 0.9848 | 1.2755 | 0.1059 | -0.0173 | 0.0148 | 0.2630 | 14.2325 | 0.5080 | -244.5065 |
| g_Dorea         | SmallVesselStroke   | Weighted median           | 16 | 1.0728 | 0.9727 | 1.1831 | 0.1595 | -0.0173 | 0.0148 | 0.2630 | 14.2325 | 0.5080 | -244.5065 |
| g_Dorea         | SmallVesselStroke   | Inverse variance weighted | 16 | 1.0481 | 0.9836 | 1.1169 | 0.1468 | -0.0173 | 0.0148 | 0.2630 | 14.2325 | 0.5080 | -244.5065 |
| g_Dorea         | SmallVesselStroke   | Simple mode               | 16 | 1.1195 | 0.9654 | 1.2983 | 0.1559 | -0.0173 | 0.0148 | 0.2630 | 14.2325 | 0.5080 | -244.5065 |
| g_Dorea         | SmallVesselStroke   | Weighted mode             | 16 | 1.0991 | 0.9746 | 1.2394 | 0.1442 | -0.0173 | 0.0148 | 0.2630 | 14.2325 | 0.5080 | -244.5065 |
| g_Dorea         | Stroke              | MR Egger                  | 18 | 1.0025 | 0.9429 | 1.0659 | 0.9365 | 0.0070  | 0.0069 | 0.3211 | 14.1448 | 0.6568 | -352.4381 |
| g_Dorea         | Stroke              | Weighted median           | 18 | 1.0346 | 0.9947 | 1.0762 | 0.0901 | 0.0070  | 0.0069 | 0.3211 | 14.1448 | 0.6568 | -352.4381 |
| g_Dorea         | Stroke              | Inverse variance weighted | 18 | 1.0309 | 1.0001 | 1.0625 | 0.0489 | 0.0070  | 0.0069 | 0.3211 | 14.1448 | 0.6568 | -352.4381 |
| g_Dorea         | Stroke              | Simple mode               | 18 | 1.0447 | 0.9732 | 1.1214 | 0.2431 | 0.0070  | 0.0069 | 0.3211 | 14.1448 | 0.6568 | -352.4381 |
| g_Dorea         | Stroke              | Weighted mode             | 18 | 1.0397 | 0.9816 | 1.1013 | 0.2023 | 0.0070  | 0.0069 | 0.3211 | 14.1448 | 0.6568 | -352.4381 |
| g_Enterobacter  | CardioEmbolicStroke | MR Egger                  | 12 | 0.9414 | 0.7664 | 1.1563 | 0.5775 | 0.0345  | 0.0589 | 0.5713 | 12.3538 | 0.2621 | -22.7134  |
| g_Enterobacter  | CardioEmbolicStroke | Weighted median           | 12 | 0.9702 | 0.8785 | 1.0714 | 0.5498 | 0.0345  | 0.0589 | 0.5713 | 12.3538 | 0.2621 | -22.7134  |
| g_Enterobacter  | CardioEmbolicStroke | Inverse variance weighted | 12 | 0.9963 | 0.9232 | 1.0753 | 0.9249 | 0.0345  | 0.0589 | 0.5713 | 12.3538 | 0.2621 | -22.7134  |

|                    |                     |                           |    |        |        |        |        |         |        |        |         |        |            |
|--------------------|---------------------|---------------------------|----|--------|--------|--------|--------|---------|--------|--------|---------|--------|------------|
| g_Enterobacter     | CardioEmbolicStroke | Simple mode               | 12 | 0.9793 | 0.8464 | 1.1330 | 0.7835 | 0.0345  | 0.0589 | 0.5713 | 12.3538 | 0.2621 | -22.7134   |
| g_Enterobacter     | CardioEmbolicStroke | Weighted mode             | 12 | 0.9759 | 0.8632 | 1.1032 | 0.7036 | 0.0345  | 0.0589 | 0.5713 | 12.3538 | 0.2621 | -22.7134   |
| g_Enterobacter     | IschemicStroke      | MR Egger                  | 16 | 0.9961 | 0.9580 | 1.0356 | 0.8452 | -0.0018 | 0.0112 | 0.8772 | 14.4192 | 0.4190 | -52.5612   |
| g_Enterobacter     | IschemicStroke      | Weighted median           | 16 | 0.9871 | 0.9654 | 1.0094 | 0.2544 | -0.0018 | 0.0112 | 0.8772 | 14.4192 | 0.4190 | -52.5612   |
| g_Enterobacter     | IschemicStroke      | Inverse variance weighted | 16 | 0.9932 | 0.9783 | 1.0083 | 0.3771 | -0.0018 | 0.0112 | 0.8772 | 14.4192 | 0.4190 | -52.5612   |
| g_Enterobacter     | IschemicStroke      | Simple mode               | 16 | 0.9784 | 0.9431 | 1.0151 | 0.2630 | -0.0018 | 0.0112 | 0.8772 | 14.4192 | 0.4190 | -52.5612   |
| g_Enterobacter     | IschemicStroke      | Weighted mode             | 16 | 0.9824 | 0.9527 | 1.0129 | 0.2733 | -0.0018 | 0.0112 | 0.8772 | 14.4192 | 0.4190 | -52.5612   |
| g_Enterobacter     | LargeArteryStroke   | MR Egger                  | 13 | 1.0440 | 0.9120 | 1.1952 | 0.5449 | 0.0041  | 0.0391 | 0.9188 | 10.2041 | 0.5121 | -22.0983   |
| g_Enterobacter     | LargeArteryStroke   | Weighted median           | 13 | 1.0575 | 0.9793 | 1.1418 | 0.1536 | 0.0041  | 0.0391 | 0.9188 | 10.2041 | 0.5121 | -22.0983   |
| g_Enterobacter     | LargeArteryStroke   | Inverse variance weighted | 13 | 1.0510 | 0.9977 | 1.1071 | 0.0611 | 0.0041  | 0.0391 | 0.9188 | 10.2041 | 0.5121 | -22.0983   |
| g_Enterobacter     | LargeArteryStroke   | Simple mode               | 13 | 1.0733 | 0.9646 | 1.1943 | 0.2185 | 0.0041  | 0.0391 | 0.9188 | 10.2041 | 0.5121 | -22.0983   |
| g_Enterobacter     | LargeArteryStroke   | Weighted mode             | 13 | 1.0587 | 0.9718 | 1.1535 | 0.2161 | 0.0041  | 0.0391 | 0.9188 | 10.2041 | 0.5121 | -22.0983   |
| g_Enterobacter     | SmallVesselStroke   | MR Egger                  | 13 | 1.0057 | 0.9150 | 1.1055 | 0.9077 | -0.0092 | 0.0273 | 0.7433 | 17.4400 | 0.0955 | -38.6696   |
| g_Enterobacter     | SmallVesselStroke   | Weighted median           | 13 | 1.0033 | 0.9614 | 1.0470 | 0.8799 | -0.0092 | 0.0273 | 0.7433 | 17.4400 | 0.0955 | -38.6696   |
| g_Enterobacter     | SmallVesselStroke   | Inverse variance weighted | 13 | 0.9908 | 0.9568 | 1.0260 | 0.6039 | -0.0092 | 0.0273 | 0.7433 | 17.4400 | 0.0955 | -38.6696   |
| g_Enterobacter     | SmallVesselStroke   | Simple mode               | 13 | 1.0127 | 0.9539 | 1.0751 | 0.6868 | -0.0092 | 0.0273 | 0.7433 | 17.4400 | 0.0955 | -38.6696   |
| g_Enterobacter     | SmallVesselStroke   | Weighted mode             | 13 | 1.0059 | 0.9569 | 1.0575 | 0.8204 | -0.0092 | 0.0273 | 0.7433 | 17.4400 | 0.0955 | -38.6696   |
| g_Enterobacter     | Stroke              | MR Egger                  | 17 | 0.9875 | 0.9512 | 1.0252 | 0.5199 | 0.0052  | 0.0105 | 0.6312 | 18.6187 | 0.2315 | -69.1089   |
| g_Enterobacter     | Stroke              | Weighted median           | 17 | 0.9872 | 0.9690 | 1.0057 | 0.1730 | 0.0052  | 0.0105 | 0.6312 | 18.6187 | 0.2315 | -69.1089   |
| g_Enterobacter     | Stroke              | Inverse variance weighted | 17 | 0.9961 | 0.9822 | 1.0101 | 0.5811 | 0.0052  | 0.0105 | 0.6312 | 18.6187 | 0.2315 | -69.1089   |
| g_Enterobacter     | Stroke              | Simple mode               | 17 | 0.9875 | 0.9566 | 1.0194 | 0.4499 | 0.0052  | 0.0105 | 0.6312 | 18.6187 | 0.2315 | -69.1089   |
| g_Enterobacter     | Stroke              | Weighted mode             | 17 | 0.9849 | 0.9592 | 1.0113 | 0.2753 | 0.0052  | 0.0105 | 0.6312 | 18.6187 | 0.2315 | -69.1089   |
| g_Escherichia      | CardioEmbolicStroke | MR Egger                  | 10 | 0.7818 | 0.6233 | 0.9807 | 0.0659 | 0.0784  | 0.0496 | 0.1525 | 7.4679  | 0.5885 | -35.9436   |
| g_Escherichia      | CardioEmbolicStroke | Weighted median           | 10 | 0.9570 | 0.8377 | 1.0933 | 0.5180 | 0.0784  | 0.0496 | 0.1525 | 7.4679  | 0.5885 | -35.9436   |
| g_Escherichia      | CardioEmbolicStroke | Inverse variance weighted | 10 | 0.9227 | 0.8384 | 1.0155 | 0.0998 | 0.0784  | 0.0496 | 0.1525 | 7.4679  | 0.5885 | -35.9436   |
| g_Escherichia      | CardioEmbolicStroke | Simple mode               | 10 | 0.9927 | 0.7831 | 1.2584 | 0.9531 | 0.0784  | 0.0496 | 0.1525 | 7.4679  | 0.5885 | -35.9436   |
| g_Escherichia      | CardioEmbolicStroke | Weighted mode             | 10 | 0.8350 | 0.6755 | 1.0321 | 0.1297 | 0.0784  | 0.0496 | 0.1525 | 7.4679  | 0.5885 | -35.9436   |
| g_Escherichia      | IschemicStroke      | MR Egger                  | 17 | 1.0050 | 0.9681 | 1.0433 | 0.7983 | -0.0029 | 0.0098 | 0.7732 | 17.3108 | 0.3006 | -49.5476   |
| g_Escherichia      | IschemicStroke      | Weighted median           | 17 | 1.0054 | 0.9810 | 1.0304 | 0.6683 | -0.0029 | 0.0098 | 0.7732 | 17.3108 | 0.3006 | -49.5476   |
| g_Escherichia      | IschemicStroke      | Inverse variance weighted | 17 | 1.0001 | 0.9823 | 1.0182 | 0.9917 | -0.0029 | 0.0098 | 0.7732 | 17.3108 | 0.3006 | -49.5476   |
| g_Escherichia      | IschemicStroke      | Simple mode               | 17 | 1.0064 | 0.9640 | 1.0507 | 0.7758 | -0.0029 | 0.0098 | 0.7732 | 17.3108 | 0.3006 | -49.5476   |
| g_Escherichia      | IschemicStroke      | Weighted mode             | 17 | 1.0070 | 0.9779 | 1.0369 | 0.6486 | -0.0029 | 0.0098 | 0.7732 | 17.3108 | 0.3006 | -49.5476   |
| g_Escherichia      | LargeArteryStroke   | MR Egger                  | 14 | 1.0753 | 0.9542 | 1.2117 | 0.2569 | -0.0352 | 0.0303 | 0.2669 | 9.5219  | 0.7325 | -23.7607   |
| g_Escherichia      | LargeArteryStroke   | Weighted median           | 14 | 1.0237 | 0.9425 | 1.1119 | 0.5788 | -0.0352 | 0.0303 | 0.2669 | 9.5219  | 0.7325 | -23.7607   |
| g_Escherichia      | LargeArteryStroke   | Inverse variance weighted | 14 | 1.0108 | 0.9533 | 1.0718 | 0.7198 | -0.0352 | 0.0303 | 0.2669 | 9.5219  | 0.7325 | -23.7607   |
| g_Escherichia      | LargeArteryStroke   | Simple mode               | 14 | 1.0147 | 0.8929 | 1.1530 | 0.8268 | -0.0352 | 0.0303 | 0.2669 | 9.5219  | 0.7325 | -23.7607   |
| g_Escherichia      | LargeArteryStroke   | Weighted mode             | 14 | 1.0300 | 0.9363 | 1.1331 | 0.5542 | -0.0352 | 0.0303 | 0.2669 | 9.5219  | 0.7325 | -23.7607   |
| g_Escherichia      | SmallVesselStroke   | MR Egger                  | 15 | 1.0112 | 0.9371 | 1.0911 | 0.7789 | 0.0079  | 0.0194 | 0.6925 | 17.4000 | 0.1817 | -31.0693   |
| g_Escherichia      | SmallVesselStroke   | Weighted median           | 15 | 1.0341 | 0.9882 | 1.0822 | 0.1477 | 0.0079  | 0.0194 | 0.6925 | 17.4000 | 0.1817 | -31.0693   |
| g_Escherichia      | SmallVesselStroke   | Inverse variance weighted | 15 | 1.0251 | 0.9886 | 1.0629 | 0.1802 | 0.0079  | 0.0194 | 0.6925 | 17.4000 | 0.1817 | -31.0693   |
| g_Escherichia      | SmallVesselStroke   | Simple mode               | 15 | 1.0329 | 0.9686 | 1.1013 | 0.3404 | 0.0079  | 0.0194 | 0.6925 | 17.4000 | 0.1817 | -31.0693   |
| g_Escherichia      | SmallVesselStroke   | Weighted mode             | 15 | 1.0339 | 0.9806 | 1.0901 | 0.2371 | 0.0079  | 0.0194 | 0.6925 | 17.4000 | 0.1817 | -31.0693   |
| g_Escherichia      | Stroke              | MR Egger                  | 17 | 1.0105 | 0.9776 | 1.0444 | 0.5459 | -0.0033 | 0.0082 | 0.6932 | 9.3909  | 0.8562 | -137.5162  |
| g_Escherichia      | Stroke              | Weighted median           | 17 | 1.0042 | 0.9824 | 1.0264 | 0.7080 | -0.0033 | 0.0082 | 0.6932 | 9.3909  | 0.8562 | -137.5162  |
| g_Escherichia      | Stroke              | Inverse variance weighted | 17 | 1.0044 | 0.9892 | 1.0199 | 0.5724 | -0.0033 | 0.0082 | 0.6932 | 9.3909  | 0.8562 | -137.5162  |
| g_Escherichia      | Stroke              | Simple mode               | 17 | 0.9863 | 0.9507 | 1.0233 | 0.4738 | -0.0033 | 0.0082 | 0.6932 | 9.3909  | 0.8562 | -137.5162  |
| g_Escherichia      | Stroke              | Weighted mode             | 17 | 0.9991 | 0.9710 | 1.0281 | 0.9529 | -0.0033 | 0.0082 | 0.6932 | 9.3909  | 0.8562 | -137.5162  |
| g_Faecalibacterium | CardioEmbolicStroke | MR Egger                  | 8  | 0.9503 | 0.5926 | 1.5240 | 0.8396 | 0.0407  | 0.0797 | 0.6282 | 2.9311  | 0.8174 | -6737.6481 |
| g_Faecalibacterium | CardioEmbolicStroke | Weighted median           | 8  | 1.1418 | 0.9328 | 1.3976 | 0.1985 | 0.0407  | 0.0797 | 0.6282 | 2.9311  | 0.8174 | -6737.6481 |
| g_Faecalibacterium | CardioEmbolicStroke | Inverse variance weighted | 8  | 1.0675 | 0.9159 | 1.2442 | 0.4033 | 0.0407  | 0.0797 | 0.6282 | 2.9311  | 0.8174 | -6737.6481 |
| g_Faecalibacterium | CardioEmbolicStroke | Simple mode               | 8  | 1.1819 | 0.8809 | 1.5858 | 0.3018 | 0.0407  | 0.0797 | 0.6282 | 2.9311  | 0.8174 | -6737.6481 |
| g_Faecalibacterium | CardioEmbolicStroke | Weighted mode             | 8  | 1.1854 | 0.8473 | 1.6584 | 0.3540 | 0.0407  | 0.0797 | 0.6282 | 2.9311  | 0.8174 | -6737.6481 |
| g_Faecalibacterium | IschemicStroke      | MR Egger                  | 29 | 0.9949 | 0.9633 | 1.0275 | 0.7594 | 0.0038  | 0.0092 | 0.6832 | 24.9113 | 0.5794 | -18.0357   |

|                    |                     |                           |    |        |        |        |        |         |        |        |         |        |            |
|--------------------|---------------------|---------------------------|----|--------|--------|--------|--------|---------|--------|--------|---------|--------|------------|
| g_Faecalibacterium | IschemicStroke      | Weighted median           | 29 | 1.0017 | 0.9767 | 1.0273 | 0.8951 | 0.0038  | 0.0092 | 0.6832 | 24.9113 | 0.5794 | -18.0357   |
| g_Faecalibacterium | IschemicStroke      | Inverse variance weighted | 29 | 1.0006 | 0.9833 | 1.0182 | 0.9446 | 0.0038  | 0.0092 | 0.6832 | 24.9113 | 0.5794 | -18.0357   |
| g_Faecalibacterium | IschemicStroke      | Simple mode               | 29 | 0.9861 | 0.9436 | 1.0304 | 0.5371 | 0.0038  | 0.0092 | 0.6832 | 24.9113 | 0.5794 | -18.0357   |
| g_Faecalibacterium | IschemicStroke      | Weighted mode             | 29 | 0.9928 | 0.9624 | 1.0242 | 0.6546 | 0.0038  | 0.0092 | 0.6832 | 24.9113 | 0.5794 | -18.0357   |
| g_Faecalibacterium | LargeArteryStroke   | MR Egger                  | 16 | 0.9174 | 0.8089 | 1.0403 | 0.2002 | 0.0625  | 0.0321 | 0.0717 | 17.5387 | 0.2877 | -10.3729   |
| g_Faecalibacterium | LargeArteryStroke   | Weighted median           | 16 | 1.0534 | 0.9595 | 1.1564 | 0.2751 | 0.0625  | 0.0321 | 0.0717 | 17.5387 | 0.2877 | -10.3729   |
| g_Faecalibacterium | LargeArteryStroke   | Inverse variance weighted | 16 | 1.0192 | 0.9472 | 1.0968 | 0.6107 | 0.0625  | 0.0321 | 0.0717 | 17.5387 | 0.2877 | -10.3729   |
| g_Faecalibacterium | LargeArteryStroke   | Simple mode               | 16 | 1.0343 | 0.8903 | 1.2017 | 0.6655 | 0.0625  | 0.0321 | 0.0717 | 17.5387 | 0.2877 | -10.3729   |
| g_Faecalibacterium | LargeArteryStroke   | Weighted mode             | 16 | 1.0439 | 0.9217 | 1.1823 | 0.5092 | 0.0625  | 0.0321 | 0.0717 | 17.5387 | 0.2877 | -10.3729   |
| g_Faecalibacterium | SmallVesselStroke   | MR Egger                  | 19 | 0.9847 | 0.9186 | 1.0557 | 0.6700 | 0.0179  | 0.0178 | 0.3296 | 15.1248 | 0.6534 | -22.3911   |
| g_Faecalibacterium | SmallVesselStroke   | Weighted median           | 19 | 1.0022 | 0.9514 | 1.0557 | 0.9341 | 0.0179  | 0.0178 | 0.3296 | 15.1248 | 0.6534 | -22.3911   |
| g_Faecalibacterium | SmallVesselStroke   | Inverse variance weighted | 19 | 1.0149 | 0.9782 | 1.0530 | 0.4299 | 0.0179  | 0.0178 | 0.3296 | 15.1248 | 0.6534 | -22.3911   |
| g_Faecalibacterium | SmallVesselStroke   | Simple mode               | 19 | 0.9917 | 0.9115 | 1.0790 | 0.8489 | 0.0179  | 0.0178 | 0.3296 | 15.1248 | 0.6534 | -22.3911   |
| g_Faecalibacterium | SmallVesselStroke   | Weighted mode             | 19 | 0.9929 | 0.9291 | 1.0612 | 0.8365 | 0.0179  | 0.0178 | 0.3296 | 15.1248 | 0.6534 | -22.3911   |
| g_Faecalibacterium | Stroke              | MR Egger                  | 26 | 0.9853 | 0.9527 | 1.0190 | 0.3967 | 0.0045  | 0.0085 | 0.6000 | 18.2837 | 0.7890 | -36.9479   |
| g_Faecalibacterium | Stroke              | Weighted median           | 26 | 0.9913 | 0.9674 | 1.0158 | 0.4836 | 0.0045  | 0.0085 | 0.6000 | 18.2837 | 0.7890 | -36.9479   |
| g_Faecalibacterium | Stroke              | Inverse variance weighted | 26 | 0.9931 | 0.9762 | 1.0102 | 0.4256 | 0.0045  | 0.0085 | 0.6000 | 18.2837 | 0.7890 | -36.9479   |
| g_Faecalibacterium | Stroke              | Simple mode               | 26 | 0.9708 | 0.9261 | 1.0176 | 0.2283 | 0.0045  | 0.0085 | 0.6000 | 18.2837 | 0.7890 | -36.9479   |
| g_Faecalibacterium | Stroke              | Weighted mode             | 26 | 0.9822 | 0.9470 | 1.0188 | 0.3451 | 0.0045  | 0.0085 | 0.6000 | 18.2837 | 0.7890 | -36.9479   |
| g_Fusobacterium    | CardioEmbolicStroke | MR Egger                  | 4  | 1.7978 | 0.3317 | 9.7428 | 0.5665 | -0.3077 | 0.4669 | 0.5776 | 2.0515  | 0.3585 | -5074.3565 |
| g_Fusobacterium    | CardioEmbolicStroke | Weighted median           | 4  | 1.0374 | 0.8980 | 1.1986 | 0.6179 | -0.3077 | 0.4669 | 0.5776 | 2.0515  | 0.3585 | -5074.3565 |
| g_Fusobacterium    | CardioEmbolicStroke | Inverse variance weighted | 4  | 1.0199 | 0.9067 | 1.1473 | 0.7424 | -0.3077 | 0.4669 | 0.5776 | 2.0515  | 0.3585 | -5074.3565 |
| g_Fusobacterium    | CardioEmbolicStroke | Simple mode               | 4  | 1.0877 | 0.8766 | 1.3498 | 0.5006 | -0.3077 | 0.4669 | 0.5776 | 2.0515  | 0.3585 | -5074.3565 |
| g_Fusobacterium    | CardioEmbolicStroke | Weighted mode             | 4  | 1.0760 | 0.8849 | 1.3084 | 0.5159 | -0.3077 | 0.4669 | 0.5776 | 2.0515  | 0.3585 | -5074.3565 |
| g_Fusobacterium    | IschemicStroke      | MR Egger                  | 10 | 1.0009 | 0.9706 | 1.0322 | 0.9534 | -0.0001 | 0.0131 | 0.9951 | 6.3986  | 0.6027 | -56.6472   |
| g_Fusobacterium    | IschemicStroke      | Weighted median           | 10 | 0.9983 | 0.9774 | 1.0196 | 0.8716 | -0.0001 | 0.0131 | 0.9951 | 6.3986  | 0.6027 | -56.6472   |
| g_Fusobacterium    | IschemicStroke      | Inverse variance weighted | 10 | 1.0009 | 0.9850 | 1.0170 | 0.9160 | -0.0001 | 0.0131 | 0.9951 | 6.3986  | 0.6027 | -56.6472   |
| g_Fusobacterium    | IschemicStroke      | Simple mode               | 10 | 0.9998 | 0.9695 | 1.0311 | 0.9915 | -0.0001 | 0.0131 | 0.9951 | 6.3986  | 0.6027 | -56.6472   |
| g_Fusobacterium    | IschemicStroke      | Weighted mode             | 10 | 1.0004 | 0.9710 | 1.0308 | 0.9779 | -0.0001 | 0.0131 | 0.9951 | 6.3986  | 0.6027 | -56.6472   |
| g_Fusobacterium    | LargeArteryStroke   | MR Egger                  | 7  | 0.8893 | 0.7788 | 1.0155 | 0.1437 | 0.0964  | 0.0492 | 0.1075 | 7.1277  | 0.3092 | -20.4416   |
| g_Fusobacterium    | LargeArteryStroke   | Weighted median           | 7  | 1.0045 | 0.9228 | 1.0935 | 0.9172 | 0.0964  | 0.0492 | 0.1075 | 7.1277  | 0.3092 | -20.4416   |
| g_Fusobacterium    | LargeArteryStroke   | Inverse variance weighted | 7  | 1.0000 | 0.9349 | 1.0696 | 0.9995 | 0.0964  | 0.0492 | 0.1075 | 7.1277  | 0.3092 | -20.4416   |
| g_Fusobacterium    | LargeArteryStroke   | Simple mode               | 7  | 1.0548 | 0.9180 | 1.2121 | 0.4799 | 0.0964  | 0.0492 | 0.1075 | 7.1277  | 0.3092 | -20.4416   |
| g_Fusobacterium    | LargeArteryStroke   | Weighted mode             | 7  | 1.0187 | 0.9058 | 1.1456 | 0.7680 | 0.0964  | 0.0492 | 0.1075 | 7.1277  | 0.3092 | -20.4416   |
| g_Fusobacterium    | SmallVesselStroke   | MR Egger                  | 7  | 1.0092 | 0.9382 | 1.0857 | 0.8146 | -0.0223 | 0.0272 | 0.4495 | 2.6303  | 0.8536 | -67.7418   |
| g_Fusobacterium    | SmallVesselStroke   | Weighted median           | 7  | 0.9725 | 0.9299 | 1.0172 | 0.2240 | -0.0223 | 0.0272 | 0.4495 | 2.6303  | 0.8536 | -67.7418   |
| g_Fusobacterium    | SmallVesselStroke   | Inverse variance weighted | 7  | 0.9824 | 0.9493 | 1.0166 | 0.3083 | -0.0223 | 0.0272 | 0.4495 | 2.6303  | 0.8536 | -67.7418   |
| g_Fusobacterium    | SmallVesselStroke   | Simple mode               | 7  | 0.9606 | 0.8991 | 1.0263 | 0.2786 | -0.0223 | 0.0272 | 0.4495 | 2.6303  | 0.8536 | -67.7418   |
| g_Fusobacterium    | SmallVesselStroke   | Weighted mode             | 7  | 0.9595 | 0.8944 | 1.0293 | 0.2925 | -0.0223 | 0.0272 | 0.4495 | 2.6303  | 0.8536 | -67.7418   |
| g_Fusobacterium    | Stroke              | MR Egger                  | 10 | 1.0017 | 0.9642 | 1.0407 | 0.9325 | 0.0006  | 0.0141 | 0.9698 | 10.8490 | 0.2104 | -60.7854   |
| g_Fusobacterium    | Stroke              | Weighted median           | 10 | 1.0056 | 0.9857 | 1.0259 | 0.5843 | 0.0006  | 0.0141 | 0.9698 | 10.8490 | 0.2104 | -60.7854   |
| g_Fusobacterium    | Stroke              | Inverse variance weighted | 10 | 1.0024 | 0.9863 | 1.0188 | 0.7730 | 0.0006  | 0.0141 | 0.9698 | 10.8490 | 0.2104 | -60.7854   |
| g_Fusobacterium    | Stroke              | Simple mode               | 10 | 1.0113 | 0.9820 | 1.0415 | 0.4740 | 0.0006  | 0.0141 | 0.9698 | 10.8490 | 0.2104 | -60.7854   |
| g_Fusobacterium    | Stroke              | Weighted mode             | 10 | 1.0094 | 0.9810 | 1.0386 | 0.5384 | 0.0006  | 0.0141 | 0.9698 | 10.8490 | 0.2104 | -60.7854   |
| g_Gemella          | CardioEmbolicStroke | MR Egger                  | 8  | 1.1790 | 0.4262 | 3.2619 | 0.7619 | -0.0226 | 0.1115 | 0.8463 | 2.1847  | 0.9020 | 186.5286   |
| g_Gemella          | CardioEmbolicStroke | Weighted median           | 8  | 1.1001 | 0.8758 | 1.3819 | 0.4122 | -0.0226 | 0.1115 | 0.8463 | 2.1847  | 0.9020 | 186.5286   |
| g_Gemella          | CardioEmbolicStroke | Inverse variance weighted | 8  | 1.0631 | 0.8896 | 1.2704 | 0.5008 | -0.0226 | 0.1115 | 0.8463 | 2.1847  | 0.9020 | 186.5286   |
| g_Gemella          | CardioEmbolicStroke | Simple mode               | 8  | 1.1152 | 0.7969 | 1.5606 | 0.5451 | -0.0226 | 0.1115 | 0.8463 | 2.1847  | 0.9020 | 186.5286   |
| g_Gemella          | CardioEmbolicStroke | Weighted mode             | 8  | 1.1203 | 0.8055 | 1.5579 | 0.5214 | -0.0226 | 0.1115 | 0.8463 | 2.1847  | 0.9020 | 186.5286   |
| g_Gemella          | IschemicStroke      | MR Egger                  | 12 | 0.9557 | 0.8978 | 1.0173 | 0.1855 | 0.0111  | 0.0087 | 0.2290 | 5.2620  | 0.9178 | -133.3205  |
| g_Gemella          | IschemicStroke      | Weighted median           | 12 | 0.9887 | 0.9488 | 1.0304 | 0.5902 | 0.0111  | 0.0087 | 0.2290 | 5.2620  | 0.9178 | -133.3205  |
| g_Gemella          | IschemicStroke      | Inverse variance weighted | 12 | 0.9899 | 0.9590 | 1.0218 | 0.5310 | 0.0111  | 0.0087 | 0.2290 | 5.2620  | 0.9178 | -133.3205  |
| g_Gemella          | IschemicStroke      | Simple mode               | 12 | 1.0215 | 0.9531 | 1.0948 | 0.5601 | 0.0111  | 0.0087 | 0.2290 | 5.2620  | 0.9178 | -133.3205  |

|                  |                     |                           |    |        |        |        |        |         |        |        |         |        |            |
|------------------|---------------------|---------------------------|----|--------|--------|--------|--------|---------|--------|--------|---------|--------|------------|
| g_Gemella        | IschemicStroke      | Weighted mode             | 12 | 1.0185 | 0.9631 | 1.0772 | 0.5329 | 0.0111  | 0.0087 | 0.2290 | 5.2620  | 0.9178 | -133.3205  |
| g_Gemella        | LargeArteryStroke   | MR Egger                  | 10 | 1.0541 | 0.5070 | 2.1916 | 0.8913 | -0.0095 | 0.0846 | 0.9134 | 18.8982 | 0.0154 | -358.7469  |
| g_Gemella        | LargeArteryStroke   | Weighted median           | 10 | 0.9326 | 0.7734 | 1.1245 | 0.4646 | -0.0095 | 0.0846 | 0.9134 | 18.8982 | 0.0154 | -358.7469  |
| g_Gemella        | LargeArteryStroke   | Inverse variance weighted | 10 | 1.0123 | 0.8457 | 1.2117 | 0.8941 | -0.0095 | 0.0846 | 0.9134 | 18.8982 | 0.0154 | -358.7469  |
| g_Gemella        | LargeArteryStroke   | Simple mode               | 10 | 0.8760 | 0.6286 | 1.2207 | 0.4542 | -0.0095 | 0.0846 | 0.9134 | 18.8982 | 0.0154 | -358.7469  |
| g_Gemella        | LargeArteryStroke   | Weighted mode             | 10 | 0.8760 | 0.6587 | 1.1650 | 0.3863 | -0.0095 | 0.0846 | 0.9134 | 18.8982 | 0.0154 | -358.7469  |
| g_Gemella        | SmallVesselStroke   | MR Egger                  | 10 | 0.8463 | 0.6497 | 1.1023 | 0.2509 | 0.0230  | 0.0306 | 0.4726 | 2.8339  | 0.9443 | -2963.0142 |
| g_Gemella        | SmallVesselStroke   | Weighted median           | 10 | 0.9454 | 0.8626 | 1.0361 | 0.2295 | 0.0230  | 0.0306 | 0.4726 | 2.8339  | 0.9443 | -2963.0142 |
| g_Gemella        | SmallVesselStroke   | Inverse variance weighted | 10 | 0.9335 | 0.8711 | 1.0004 | 0.0512 | 0.0230  | 0.0306 | 0.4726 | 2.8339  | 0.9443 | -2963.0142 |
| g_Gemella        | SmallVesselStroke   | Simple mode               | 10 | 0.8872 | 0.7705 | 1.0215 | 0.1305 | 0.0230  | 0.0306 | 0.4726 | 2.8339  | 0.9443 | -2963.0142 |
| g_Gemella        | SmallVesselStroke   | Weighted mode             | 10 | 0.9543 | 0.8347 | 1.0911 | 0.5108 | 0.0230  | 0.0306 | 0.4726 | 2.8339  | 0.9443 | -2963.0142 |
| g_Gemella        | Stroke              | MR Egger                  | 12 | 0.9666 | 0.8651 | 1.0800 | 0.5616 | 0.0072  | 0.0130 | 0.5919 | 9.0449  | 0.5279 | -1752.4483 |
| g_Gemella        | Stroke              | Weighted median           | 12 | 1.0054 | 0.9613 | 1.0515 | 0.8154 | 0.0072  | 0.0130 | 0.5919 | 9.0449  | 0.5279 | -1752.4483 |
| g_Gemella        | Stroke              | Inverse variance weighted | 12 | 0.9961 | 0.9651 | 1.0280 | 0.8071 | 0.0072  | 0.0130 | 0.5919 | 9.0449  | 0.5279 | -1752.4483 |
| g_Gemella        | Stroke              | Simple mode               | 12 | 1.0259 | 0.9546 | 1.1025 | 0.5012 | 0.0072  | 0.0130 | 0.5919 | 9.0449  | 0.5279 | -1752.4483 |
| g_Gemella        | Stroke              | Weighted mode             | 12 | 1.0284 | 0.9506 | 1.1125 | 0.4999 | 0.0072  | 0.0130 | 0.5919 | 9.0449  | 0.5279 | -1752.4483 |
| g_Granulicatella | CardioEmbolicStroke | MR Egger                  | 10 | 1.0313 | 0.3719 | 2.8597 | 0.9542 | 0.0099  | 0.1107 | 0.9309 | 32.4483 | 0.0001 | 276.2747   |
| g_Granulicatella | CardioEmbolicStroke | Weighted median           | 10 | 1.0729 | 0.8151 | 1.4122 | 0.6160 | 0.0099  | 0.1107 | 0.9309 | 32.4483 | 0.0001 | 276.2747   |
| g_Granulicatella | CardioEmbolicStroke | Inverse variance weighted | 10 | 1.0773 | 0.7681 | 1.5109 | 0.6662 | 0.0099  | 0.1107 | 0.9309 | 32.4483 | 0.0001 | 276.2747   |
| g_Granulicatella | CardioEmbolicStroke | Simple mode               | 10 | 1.0305 | 0.7008 | 1.5153 | 0.8819 | 0.0099  | 0.1107 | 0.9309 | 32.4483 | 0.0001 | 276.2747   |
| g_Granulicatella | CardioEmbolicStroke | Weighted mode             | 10 | 1.0097 | 0.7088 | 1.4383 | 0.9586 | 0.0099  | 0.1107 | 0.9309 | 32.4483 | 0.0001 | 276.2747   |
| g_Granulicatella | IschemicStroke      | MR Egger                  | 21 | 1.0152 | 0.9515 | 1.0831 | 0.6534 | -0.0065 | 0.0087 | 0.4622 | 21.6120 | 0.3040 | -81.6328   |
| g_Granulicatella | IschemicStroke      | Weighted median           | 21 | 1.0051 | 0.9610 | 1.0513 | 0.8227 | -0.0065 | 0.0087 | 0.4622 | 21.6120 | 0.3040 | -81.6328   |
| g_Granulicatella | IschemicStroke      | Inverse variance weighted | 21 | 0.9935 | 0.9629 | 1.0250 | 0.6807 | -0.0065 | 0.0087 | 0.4622 | 21.6120 | 0.3040 | -81.6328   |
| g_Granulicatella | IschemicStroke      | Simple mode               | 21 | 1.0204 | 0.9298 | 1.1199 | 0.6743 | -0.0065 | 0.0087 | 0.4622 | 21.6120 | 0.3040 | -81.6328   |
| g_Granulicatella | IschemicStroke      | Weighted mode             | 21 | 1.0141 | 0.9331 | 1.1022 | 0.7446 | -0.0065 | 0.0087 | 0.4622 | 21.6120 | 0.3040 | -81.6328   |
| g_Granulicatella | LargeArteryStroke   | MR Egger                  | 16 | 0.8656 | 0.6831 | 1.0969 | 0.2522 | 0.0122  | 0.0307 | 0.6968 | 15.7445 | 0.3292 | -15.6045   |
| g_Granulicatella | LargeArteryStroke   | Weighted median           | 16 | 0.9084 | 0.7779 | 1.0609 | 0.2250 | 0.0122  | 0.0307 | 0.6968 | 15.7445 | 0.3292 | -15.6045   |
| g_Granulicatella | LargeArteryStroke   | Inverse variance weighted | 16 | 0.9029 | 0.8084 | 1.0084 | 0.0700 | 0.0122  | 0.0307 | 0.6968 | 15.7445 | 0.3292 | -15.6045   |
| g_Granulicatella | LargeArteryStroke   | Simple mode               | 16 | 0.9299 | 0.7044 | 1.2276 | 0.6156 | 0.0122  | 0.0307 | 0.6968 | 15.7445 | 0.3292 | -15.6045   |
| g_Granulicatella | LargeArteryStroke   | Weighted mode             | 16 | 0.9381 | 0.7520 | 1.1704 | 0.5799 | 0.0122  | 0.0307 | 0.6968 | 15.7445 | 0.3292 | -15.6045   |
| g_Granulicatella | SmallVesselStroke   | MR Egger                  | 16 | 0.9712 | 0.8438 | 1.1180 | 0.6906 | 0.0131  | 0.0183 | 0.4849 | 18.0217 | 0.2058 | -39.6499   |
| g_Granulicatella | SmallVesselStroke   | Weighted median           | 16 | 0.9973 | 0.9151 | 1.0869 | 0.9510 | 0.0131  | 0.0183 | 0.4849 | 18.0217 | 0.2058 | -39.6499   |
| g_Granulicatella | SmallVesselStroke   | Inverse variance weighted | 16 | 1.0161 | 0.9508 | 1.0859 | 0.6368 | 0.0131  | 0.0183 | 0.4849 | 18.0217 | 0.2058 | -39.6499   |
| g_Granulicatella | SmallVesselStroke   | Simple mode               | 16 | 1.0785 | 0.9201 | 1.2641 | 0.3658 | 0.0131  | 0.0183 | 0.4849 | 18.0217 | 0.2058 | -39.6499   |
| g_Granulicatella | SmallVesselStroke   | Weighted mode             | 16 | 1.0465 | 0.9009 | 1.2157 | 0.5609 | 0.0131  | 0.0183 | 0.4849 | 18.0217 | 0.2058 | -39.6499   |
| g_Granulicatella | Stroke              | MR Egger                  | 20 | 1.0555 | 0.9932 | 1.1217 | 0.0987 | -0.0135 | 0.0077 | 0.0975 | 16.8198 | 0.6021 | -137.6795  |
| g_Granulicatella | Stroke              | Weighted median           | 20 | 1.0248 | 0.9859 | 1.0652 | 0.2149 | -0.0135 | 0.0077 | 0.0975 | 16.8198 | 0.6021 | -137.6795  |
| g_Granulicatella | Stroke              | Inverse variance weighted | 20 | 1.0054 | 0.9788 | 1.0327 | 0.6949 | -0.0135 | 0.0077 | 0.0975 | 16.8198 | 0.6021 | -137.6795  |
| g_Granulicatella | Stroke              | Simple mode               | 20 | 1.0370 | 0.9706 | 1.1078 | 0.2952 | -0.0135 | 0.0077 | 0.0975 | 16.8198 | 0.6021 | -137.6795  |
| g_Granulicatella | Stroke              | Weighted mode             | 20 | 1.0354 | 0.9691 | 1.1062 | 0.3155 | -0.0135 | 0.0077 | 0.0975 | 16.8198 | 0.6021 | -137.6795  |
| g_Klebsiella     | CardioEmbolicStroke | MR Egger                  | 7  | 1.5185 | 0.6480 | 3.5583 | 0.3805 | -0.1462 | 0.1849 | 0.4650 | 5.3028  | 0.3801 | -1140.6399 |
| g_Klebsiella     | CardioEmbolicStroke | Weighted median           | 7  | 1.1102 | 0.9764 | 1.2624 | 0.1107 | -0.1462 | 0.1849 | 0.4650 | 5.3028  | 0.3801 | -1140.6399 |
| g_Klebsiella     | CardioEmbolicStroke | Inverse variance weighted | 7  | 1.0794 | 0.9822 | 1.1863 | 0.1124 | -0.1462 | 0.1849 | 0.4650 | 5.3028  | 0.3801 | -1140.6399 |
| g_Klebsiella     | CardioEmbolicStroke | Simple mode               | 7  | 1.1536 | 0.9155 | 1.4537 | 0.2711 | -0.1462 | 0.1849 | 0.4650 | 5.3028  | 0.3801 | -1140.6399 |
| g_Klebsiella     | CardioEmbolicStroke | Weighted mode             | 7  | 1.1657 | 0.9335 | 1.4558 | 0.2249 | -0.1462 | 0.1849 | 0.4650 | 5.3028  | 0.3801 | -1140.6399 |
| g_Klebsiella     | IschemicStroke      | MR Egger                  | 8  | 0.9586 | 0.8927 | 1.0294 | 0.2893 | 0.0135  | 0.0165 | 0.4444 | 3.1634  | 0.7881 | -280.7291  |
| g_Klebsiella     | IschemicStroke      | Weighted median           | 8  | 0.9824 | 0.9571 | 1.0084 | 0.1828 | 0.0135  | 0.0165 | 0.4444 | 3.1634  | 0.7881 | -280.7291  |
| g_Klebsiella     | IschemicStroke      | Inverse variance weighted | 8  | 0.9864 | 0.9666 | 1.0066 | 0.1844 | 0.0135  | 0.0165 | 0.4444 | 3.1634  | 0.7881 | -280.7291  |
| g_Klebsiella     | IschemicStroke      | Simple mode               | 8  | 0.9763 | 0.9404 | 1.0137 | 0.2512 | 0.0135  | 0.0165 | 0.4444 | 3.1634  | 0.7881 | -280.7291  |
| g_Klebsiella     | IschemicStroke      | Weighted mode             | 8  | 0.9769 | 0.9394 | 1.0159 | 0.2801 | 0.0135  | 0.0165 | 0.4444 | 3.1634  | 0.7881 | -280.7291  |
| g_Klebsiella     | LargeArteryStroke   | MR Egger                  | 7  | 1.4322 | 0.7759 | 2.6438 | 0.3026 | -0.1692 | 0.1332 | 0.2597 | 5.5295  | 0.4779 | -2277.2533 |
| g_Klebsiella     | LargeArteryStroke   | Weighted median           | 7  | 0.9979 | 0.9084 | 1.0962 | 0.9646 | -0.1692 | 0.1332 | 0.2597 | 5.5295  | 0.4779 | -2277.2533 |

|               |                     |                           |    |        |        |        |        |         |        |        |         |        |            |
|---------------|---------------------|---------------------------|----|--------|--------|--------|--------|---------|--------|--------|---------|--------|------------|
| g_Klebsiella  | LargeArteryStroke   | Inverse variance weighted | 7  | 0.9651 | 0.8995 | 1.0354 | 0.3220 | -0.1692 | 0.1332 | 0.2597 | 5.5295  | 0.4779 | -2277.2533 |
| g_Klebsiella  | LargeArteryStroke   | Simple mode               | 7  | 0.9962 | 0.8672 | 1.1444 | 0.9589 | -0.1692 | 0.1332 | 0.2597 | 5.5295  | 0.4779 | -2277.2533 |
| g_Klebsiella  | LargeArteryStroke   | Weighted mode             | 7  | 0.9953 | 0.8660 | 1.1439 | 0.9494 | -0.1692 | 0.1332 | 0.2597 | 5.5295  | 0.4779 | -2277.2533 |
| g_Klebsiella  | SmallVesselStroke   | MR Egger                  | 8  | 0.9120 | 0.8032 | 1.0357 | 0.2056 | 0.0342  | 0.0295 | 0.2901 | 5.3885  | 0.6127 | -99.4516   |
| g_Klebsiella  | SmallVesselStroke   | Weighted median           | 8  | 0.9769 | 0.9322 | 1.0236 | 0.3263 | 0.0342  | 0.0295 | 0.2901 | 5.3885  | 0.6127 | -99.4516   |
| g_Klebsiella  | SmallVesselStroke   | Inverse variance weighted | 8  | 0.9802 | 0.9452 | 1.0166 | 0.2823 | 0.0342  | 0.0295 | 0.2901 | 5.3885  | 0.6127 | -99.4516   |
| g_Klebsiella  | SmallVesselStroke   | Simple mode               | 8  | 0.9488 | 0.8800 | 1.0230 | 0.2135 | 0.0342  | 0.0295 | 0.2901 | 5.3885  | 0.6127 | -99.4516   |
| g_Klebsiella  | SmallVesselStroke   | Weighted mode             | 8  | 0.9536 | 0.8874 | 1.0247 | 0.2368 | 0.0342  | 0.0295 | 0.2901 | 5.3885  | 0.6127 | -99.4516   |
| g_Klebsiella  | Stroke              | MR Egger                  | 8  | 0.9698 | 0.8723 | 1.0783 | 0.5918 | 0.0094  | 0.0234 | 0.7029 | 3.3702  | 0.7612 | -907.8332  |
| g_Klebsiella  | Stroke              | Weighted median           | 8  | 0.9865 | 0.9639 | 1.0097 | 0.2519 | 0.0094  | 0.0234 | 0.7029 | 3.3702  | 0.7612 | -907.8332  |
| g_Klebsiella  | Stroke              | Inverse variance weighted | 8  | 0.9907 | 0.9729 | 1.0089 | 0.3167 | 0.0094  | 0.0234 | 0.7029 | 3.3702  | 0.7612 | -907.8332  |
| g_Klebsiella  | Stroke              | Simple mode               | 8  | 0.9846 | 0.9511 | 1.0194 | 0.4103 | 0.0094  | 0.0234 | 0.7029 | 3.3702  | 0.7612 | -907.8332  |
| g_Klebsiella  | Stroke              | Weighted mode             | 8  | 0.9851 | 0.9539 | 1.0173 | 0.3903 | 0.0094  | 0.0234 | 0.7029 | 3.3702  | 0.7612 | -907.8332  |
| g_Lactococcus | CardioEmbolicStroke | MR Egger                  | 7  | 1.0342 | 0.6115 | 1.7492 | 0.9051 | -0.0264 | 0.0761 | 0.7424 | 3.0583  | 0.6910 | 1433.8623  |
| g_Lactococcus | CardioEmbolicStroke | Weighted median           | 7  | 0.9580 | 0.8015 | 1.1450 | 0.6368 | -0.0264 | 0.0761 | 0.7424 | 3.0583  | 0.6910 | 1433.8623  |
| g_Lactococcus | CardioEmbolicStroke | Inverse variance weighted | 7  | 0.9457 | 0.8162 | 1.0957 | 0.4574 | -0.0264 | 0.0761 | 0.7424 | 3.0583  | 0.6910 | 1433.8623  |
| g_Lactococcus | CardioEmbolicStroke | Simple mode               | 7  | 0.9762 | 0.7365 | 1.2939 | 0.8723 | -0.0264 | 0.0761 | 0.7424 | 3.0583  | 0.6910 | 1433.8623  |
| g_Lactococcus | CardioEmbolicStroke | Weighted mode             | 7  | 0.9671 | 0.7504 | 1.2465 | 0.8050 | -0.0264 | 0.0761 | 0.7424 | 3.0583  | 0.6910 | 1433.8623  |
| g_Lactococcus | IschemicStroke      | MR Egger                  | 11 | 1.0105 | 0.9498 | 1.0751 | 0.7475 | -0.0122 | 0.0111 | 0.2994 | 14.9101 | 0.1354 | -131.2422  |
| g_Lactococcus | IschemicStroke      | Weighted median           | 11 | 0.9805 | 0.9455 | 1.0167 | 0.2873 | -0.0122 | 0.0111 | 0.2994 | 14.9101 | 0.1354 | -131.2422  |
| g_Lactococcus | IschemicStroke      | Inverse variance weighted | 11 | 0.9805 | 0.9504 | 1.0116 | 0.2165 | -0.0122 | 0.0111 | 0.2994 | 14.9101 | 0.1354 | -131.2422  |
| g_Lactococcus | IschemicStroke      | Simple mode               | 11 | 0.9791 | 0.9247 | 1.0366 | 0.4845 | -0.0122 | 0.0111 | 0.2994 | 14.9101 | 0.1354 | -131.2422  |
| g_Lactococcus | IschemicStroke      | Weighted mode             | 11 | 0.9815 | 0.9395 | 1.0254 | 0.4223 | -0.0122 | 0.0111 | 0.2994 | 14.9101 | 0.1354 | -131.2422  |
| g_Lactococcus | LargeArteryStroke   | MR Egger                  | 8  | 0.9741 | 0.6687 | 1.4189 | 0.8956 | -0.0009 | 0.0590 | 0.9885 | 11.9037 | 0.0642 | -445.6485  |
| g_Lactococcus | LargeArteryStroke   | Weighted median           | 8  | 1.0331 | 0.9041 | 1.1805 | 0.6323 | -0.0009 | 0.0590 | 0.9885 | 11.9037 | 0.0642 | -445.6485  |
| g_Lactococcus | LargeArteryStroke   | Inverse variance weighted | 8  | 0.9715 | 0.8521 | 1.1076 | 0.6655 | -0.0009 | 0.0590 | 0.9885 | 11.9037 | 0.0642 | -445.6485  |
| g_Lactococcus | LargeArteryStroke   | Simple mode               | 8  | 1.0784 | 0.8889 | 1.3082 | 0.4689 | -0.0009 | 0.0590 | 0.9885 | 11.9037 | 0.0642 | -445.6485  |
| g_Lactococcus | LargeArteryStroke   | Weighted mode             | 8  | 1.0806 | 0.8872 | 1.3161 | 0.4664 | -0.0009 | 0.0590 | 0.9885 | 11.9037 | 0.0642 | -445.6485  |
| g_Lactococcus | SmallVesselStroke   | MR Egger                  | 8  | 1.0744 | 0.9266 | 1.2457 | 0.3787 | -0.0336 | 0.0232 | 0.1979 | 7.3350  | 0.3949 | -1643.8451 |
| g_Lactococcus | SmallVesselStroke   | Weighted median           | 8  | 0.9783 | 0.9039 | 1.0589 | 0.5869 | -0.0336 | 0.0232 | 0.1979 | 7.3350  | 0.3949 | -1643.8451 |
| g_Lactococcus | SmallVesselStroke   | Inverse variance weighted | 8  | 0.9709 | 0.9171 | 1.0278 | 0.3100 | -0.0336 | 0.0232 | 0.1979 | 7.3350  | 0.3949 | -1643.8451 |
| g_Lactococcus | SmallVesselStroke   | Simple mode               | 8  | 0.9353 | 0.8221 | 1.0640 | 0.3428 | -0.0336 | 0.0232 | 0.1979 | 7.3350  | 0.3949 | -1643.8451 |
| g_Lactococcus | SmallVesselStroke   | Weighted mode             | 8  | 0.9852 | 0.8639 | 1.1235 | 0.8298 | -0.0336 | 0.0232 | 0.1979 | 7.3350  | 0.3949 | -1643.8451 |
| g_Lactococcus | Stroke              | MR Egger                  | 11 | 0.9869 | 0.9156 | 1.0638 | 0.7386 | -0.0011 | 0.0120 | 0.9307 | 12.1162 | 0.2068 | -239.0588  |
| g_Lactococcus | Stroke              | Weighted median           | 11 | 0.9902 | 0.9557 | 1.0259 | 0.5861 | -0.0011 | 0.0120 | 0.9307 | 12.1162 | 0.2068 | -239.0588  |
| g_Lactococcus | Stroke              | Inverse variance weighted | 11 | 0.9838 | 0.9569 | 1.0115 | 0.2493 | -0.0011 | 0.0120 | 0.9307 | 12.1162 | 0.2068 | -239.0588  |
| g_Lactococcus | Stroke              | Simple mode               | 11 | 0.9943 | 0.9439 | 1.0473 | 0.8323 | -0.0011 | 0.0120 | 0.9307 | 12.1162 | 0.2068 | -239.0588  |
| g_Lactococcus | Stroke              | Weighted mode             | 11 | 0.9943 | 0.9435 | 1.0477 | 0.8336 | -0.0011 | 0.0120 | 0.9307 | 12.1162 | 0.2068 | -239.0588  |
| g_Megasphaera | CardioEmbolicStroke | MR Egger                  | 8  | 1.3228 | 0.9306 | 1.8802 | 0.1700 | -0.0840 | 0.0718 | 0.2862 | 6.0319  | 0.5360 | -129.8511  |
| g_Megasphaera | CardioEmbolicStroke | Weighted median           | 8  | 1.0504 | 0.8962 | 1.2311 | 0.5441 | -0.0840 | 0.0718 | 0.2862 | 6.0319  | 0.5360 | -129.8511  |
| g_Megasphaera | CardioEmbolicStroke | Inverse variance weighted | 8  | 1.0848 | 0.9664 | 1.2178 | 0.1676 | -0.0840 | 0.0718 | 0.2862 | 6.0319  | 0.5360 | -129.8511  |
| g_Megasphaera | CardioEmbolicStroke | Simple mode               | 8  | 0.9954 | 0.7853 | 1.2616 | 0.9706 | -0.0840 | 0.0718 | 0.2862 | 6.0319  | 0.5360 | -129.8511  |
| g_Megasphaera | CardioEmbolicStroke | Weighted mode             | 8  | 1.0177 | 0.8100 | 1.2788 | 0.8842 | -0.0840 | 0.0718 | 0.2862 | 6.0319  | 0.5360 | -129.8511  |
| g_Megasphaera | IschemicStroke      | MR Egger                  | 23 | 0.9844 | 0.9627 | 1.0065 | 0.1802 | 0.0169  | 0.0081 | 0.0488 | 19.1093 | 0.6386 | -29.0812   |
| g_Megasphaera | IschemicStroke      | Weighted median           | 23 | 1.0066 | 0.9880 | 1.0255 | 0.4895 | 0.0169  | 0.0081 | 0.0488 | 19.1093 | 0.6386 | -29.0812   |
| g_Megasphaera | IschemicStroke      | Inverse variance weighted | 23 | 1.0036 | 0.9906 | 1.0167 | 0.5915 | 0.0169  | 0.0081 | 0.0488 | 19.1093 | 0.6386 | -29.0812   |
| g_Megasphaera | IschemicStroke      | Simple mode               | 23 | 1.0055 | 0.9738 | 1.0383 | 0.7395 | 0.0169  | 0.0081 | 0.0488 | 19.1093 | 0.6386 | -29.0812   |
| g_Megasphaera | IschemicStroke      | Weighted mode             | 23 | 0.9998 | 0.9715 | 1.0288 | 0.9877 | 0.0169  | 0.0081 | 0.0488 | 19.1093 | 0.6386 | -29.0812   |
| g_Megasphaera | LargeArteryStroke   | MR Egger                  | 18 | 0.9877 | 0.9085 | 1.0737 | 0.7752 | 0.0227  | 0.0276 | 0.4227 | 10.1544 | 0.8584 | -15.1434   |
| g_Megasphaera | LargeArteryStroke   | Weighted median           | 18 | 1.0113 | 0.9470 | 1.0799 | 0.7379 | 0.0227  | 0.0276 | 0.4227 | 10.1544 | 0.8584 | -15.1434   |
| g_Megasphaera | LargeArteryStroke   | Inverse variance weighted | 18 | 1.0166 | 0.9693 | 1.0661 | 0.4986 | 0.0227  | 0.0276 | 0.4227 | 10.1544 | 0.8584 | -15.1434   |
| g_Megasphaera | LargeArteryStroke   | Simple mode               | 18 | 0.9906 | 0.8991 | 1.0914 | 0.8508 | 0.0227  | 0.0276 | 0.4227 | 10.1544 | 0.8584 | -15.1434   |
| g_Megasphaera | LargeArteryStroke   | Weighted mode             | 18 | 1.0118 | 0.9257 | 1.1058 | 0.7992 | 0.0227  | 0.0276 | 0.4227 | 10.1544 | 0.8584 | -15.1434   |

|               |                     |                           |    |        |        |        |        |         |        |        |         |        |            |
|---------------|---------------------|---------------------------|----|--------|--------|--------|--------|---------|--------|--------|---------|--------|------------|
| g_Megasphaera | SmallVesselStroke   | MR Egger                  | 19 | 0.9571 | 0.9069 | 1.0100 | 0.1288 | 0.0311  | 0.0182 | 0.1061 | 29.0307 | 0.0480 | -5.7998    |
| g_Megasphaera | SmallVesselStroke   | Weighted median           | 19 | 1.0011 | 0.9654 | 1.0381 | 0.9537 | 0.0311  | 0.0182 | 0.1061 | 29.0307 | 0.0480 | -5.7998    |
| g_Megasphaera | SmallVesselStroke   | Inverse variance weighted | 19 | 0.9945 | 0.9626 | 1.0274 | 0.7406 | 0.0311  | 0.0182 | 0.1061 | 29.0307 | 0.0480 | -5.7998    |
| g_Megasphaera | SmallVesselStroke   | Simple mode               | 19 | 1.0057 | 0.9478 | 1.0672 | 0.8531 | 0.0311  | 0.0182 | 0.1061 | 29.0307 | 0.0480 | -5.7998    |
| g_Megasphaera | SmallVesselStroke   | Weighted mode             | 19 | 1.0006 | 0.9547 | 1.0487 | 0.9797 | 0.0311  | 0.0182 | 0.1061 | 29.0307 | 0.0480 | -5.7998    |
| g_Megasphaera | Stroke              | MR Egger                  | 18 | 0.9881 | 0.9607 | 1.0162 | 0.4158 | 0.0121  | 0.0081 | 0.1551 | 18.3532 | 0.3669 | -49.9092   |
| g_Megasphaera | Stroke              | Weighted median           | 18 | 1.0137 | 0.9925 | 1.0353 | 0.2070 | 0.0121  | 0.0081 | 0.1551 | 18.3532 | 0.3669 | -49.9092   |
| g_Megasphaera | Stroke              | Inverse variance weighted | 18 | 1.0063 | 0.9913 | 1.0216 | 0.4101 | 0.0121  | 0.0081 | 0.1551 | 18.3532 | 0.3669 | -49.9092   |
| g_Megasphaera | Stroke              | Simple mode               | 18 | 1.0320 | 0.9879 | 1.0782 | 0.1754 | 0.0121  | 0.0081 | 0.1551 | 18.3532 | 0.3669 | -49.9092   |
| g_Megasphaera | Stroke              | Weighted mode             | 18 | 1.0324 | 0.9991 | 1.0669 | 0.0735 | 0.0121  | 0.0081 | 0.1551 | 18.3532 | 0.3669 | -49.9092   |
| g_Mitsuokella | CardioEmbolicStroke | MR Egger                  | 7  | 0.9859 | 0.7194 | 1.3512 | 0.9331 | 0.0344  | 0.0770 | 0.6735 | 1.2833  | 0.9366 | -309.1318  |
| g_Mitsuokella | CardioEmbolicStroke | Weighted median           | 7  | 1.0211 | 0.8942 | 1.1661 | 0.7577 | 0.0344  | 0.0770 | 0.6735 | 1.2833  | 0.9366 | -309.1318  |
| g_Mitsuokella | CardioEmbolicStroke | Inverse variance weighted | 7  | 1.0549 | 0.9483 | 1.1736 | 0.3252 | 0.0344  | 0.0770 | 0.6735 | 1.2833  | 0.9366 | -309.1318  |
| g_Mitsuokella | CardioEmbolicStroke | Simple mode               | 7  | 1.0068 | 0.8414 | 1.2048 | 0.9431 | 0.0344  | 0.0770 | 0.6735 | 1.2833  | 0.9366 | -309.1318  |
| g_Mitsuokella | CardioEmbolicStroke | Weighted mode             | 7  | 1.0106 | 0.8602 | 1.1871 | 0.9024 | 0.0344  | 0.0770 | 0.6735 | 1.2833  | 0.9366 | -309.1318  |
| g_Mitsuokella | IschemicStroke      | MR Egger                  | 29 | 1.0081 | 0.9914 | 1.0250 | 0.3520 | -0.0114 | 0.0084 | 0.1869 | 30.3127 | 0.3484 | -12.4355   |
| g_Mitsuokella | IschemicStroke      | Weighted median           | 29 | 0.9983 | 0.9843 | 1.0126 | 0.8172 | -0.0114 | 0.0084 | 0.1869 | 30.3127 | 0.3484 | -12.4355   |
| g_Mitsuokella | IschemicStroke      | Inverse variance weighted | 29 | 0.9987 | 0.9890 | 1.0085 | 0.7874 | -0.0114 | 0.0084 | 0.1869 | 30.3127 | 0.3484 | -12.4355   |
| g_Mitsuokella | IschemicStroke      | Simple mode               | 29 | 0.9991 | 0.9777 | 1.0210 | 0.9354 | -0.0114 | 0.0084 | 0.1869 | 30.3127 | 0.3484 | -12.4355   |
| g_Mitsuokella | IschemicStroke      | Weighted mode             | 29 | 0.9979 | 0.9812 | 1.0148 | 0.8080 | -0.0114 | 0.0084 | 0.1869 | 30.3127 | 0.3484 | -12.4355   |
| g_Mitsuokella | LargeArteryStroke   | MR Egger                  | 21 | 1.0152 | 0.9533 | 1.0811 | 0.6445 | -0.0367 | 0.0285 | 0.2133 | 18.3081 | 0.5671 | -4.6257    |
| g_Mitsuokella | LargeArteryStroke   | Weighted median           | 21 | 1.0030 | 0.9526 | 1.0561 | 0.9092 | -0.0367 | 0.0285 | 0.2133 | 18.3081 | 0.5671 | -4.6257    |
| g_Mitsuokella | LargeArteryStroke   | Inverse variance weighted | 21 | 0.9814 | 0.9466 | 1.0174 | 0.3071 | -0.0367 | 0.0285 | 0.2133 | 18.3081 | 0.5671 | -4.6257    |
| g_Mitsuokella | LargeArteryStroke   | Simple mode               | 21 | 0.9839 | 0.8962 | 1.0802 | 0.7367 | -0.0367 | 0.0285 | 0.2133 | 18.3081 | 0.5671 | -4.6257    |
| g_Mitsuokella | LargeArteryStroke   | Weighted mode             | 21 | 0.9996 | 0.9336 | 1.0702 | 0.9905 | -0.0367 | 0.0285 | 0.2133 | 18.3081 | 0.5671 | -4.6257    |
| g_Mitsuokella | SmallVesselStroke   | MR Egger                  | 22 | 1.0201 | 0.9892 | 1.0519 | 0.2203 | -0.0310 | 0.0151 | 0.0532 | 23.1061 | 0.3383 | -8.7204    |
| g_Mitsuokella | SmallVesselStroke   | Weighted median           | 22 | 0.9986 | 0.9725 | 1.0254 | 0.9191 | -0.0310 | 0.0151 | 0.0532 | 23.1061 | 0.3383 | -8.7204    |
| g_Mitsuokella | SmallVesselStroke   | Inverse variance weighted | 22 | 0.9940 | 0.9750 | 1.0133 | 0.5378 | -0.0310 | 0.0151 | 0.0532 | 23.1061 | 0.3383 | -8.7204    |
| g_Mitsuokella | SmallVesselStroke   | Simple mode               | 22 | 0.9969 | 0.9524 | 1.0435 | 0.8960 | -0.0310 | 0.0151 | 0.0532 | 23.1061 | 0.3383 | -8.7204    |
| g_Mitsuokella | SmallVesselStroke   | Weighted mode             | 22 | 1.0019 | 0.9742 | 1.0303 | 0.8978 | -0.0310 | 0.0151 | 0.0532 | 23.1061 | 0.3383 | -8.7204    |
| g_Mitsuokella | Stroke              | MR Egger                  | 25 | 1.0075 | 0.9875 | 1.0280 | 0.4728 | -0.0126 | 0.0086 | 0.1556 | 29.8017 | 0.1914 | -15.4379   |
| g_Mitsuokella | Stroke              | Weighted median           | 25 | 1.0023 | 0.9880 | 1.0169 | 0.7515 | -0.0126 | 0.0086 | 0.1556 | 29.8017 | 0.1914 | -15.4379   |
| g_Mitsuokella | Stroke              | Inverse variance weighted | 25 | 0.9949 | 0.9837 | 1.0062 | 0.3744 | -0.0126 | 0.0086 | 0.1556 | 29.8017 | 0.1914 | -15.4379   |
| g_Mitsuokella | Stroke              | Simple mode               | 25 | 1.0072 | 0.9858 | 1.0291 | 0.5207 | -0.0126 | 0.0086 | 0.1556 | 29.8017 | 0.1914 | -15.4379   |
| g_Mitsuokella | Stroke              | Weighted mode             | 25 | 1.0045 | 0.9884 | 1.0209 | 0.5882 | -0.0126 | 0.0086 | 0.1556 | 29.8017 | 0.1914 | -15.4379   |
| g_Mobiluncus  | CardioEmbolicStroke | MR Egger                  | 15 | 0.8508 | 0.4749 | 1.5244 | 0.5963 | 0.0416  | 0.0768 | 0.5971 | 14.6081 | 0.3324 | -2077.4365 |
| g_Mobiluncus  | CardioEmbolicStroke | Weighted median           | 15 | 0.9475 | 0.8032 | 1.1177 | 0.5225 | 0.0416  | 0.0768 | 0.5971 | 14.6081 | 0.3324 | -2077.4365 |
| g_Mobiluncus  | CardioEmbolicStroke | Inverse variance weighted | 15 | 0.9956 | 0.8773 | 1.1299 | 0.9456 | 0.0416  | 0.0768 | 0.5971 | 14.6081 | 0.3324 | -2077.4365 |
| g_Mobiluncus  | CardioEmbolicStroke | Simple mode               | 15 | 1.2254 | 0.8882 | 1.6906 | 0.2361 | 0.0416  | 0.0768 | 0.5971 | 14.6081 | 0.3324 | -2077.4365 |
| g_Mobiluncus  | CardioEmbolicStroke | Weighted mode             | 15 | 0.9029 | 0.6762 | 1.2057 | 0.5002 | 0.0416  | 0.0768 | 0.5971 | 14.6081 | 0.3324 | -2077.4365 |
| g_Mobiluncus  | IschemicStroke      | MR Egger                  | 24 | 0.9818 | 0.9424 | 1.0229 | 0.3899 | 0.0077  | 0.0071 | 0.2914 | 24.7662 | 0.3625 | -38.9886   |
| g_Mobiluncus  | IschemicStroke      | Weighted median           | 24 | 1.0078 | 0.9766 | 1.0400 | 0.6283 | 0.0077  | 0.0071 | 0.2914 | 24.7662 | 0.3625 | -38.9886   |
| g_Mobiluncus  | IschemicStroke      | Inverse variance weighted | 24 | 1.0009 | 0.9796 | 1.0227 | 0.9323 | 0.0077  | 0.0071 | 0.2914 | 24.7662 | 0.3625 | -38.9886   |
| g_Mobiluncus  | IschemicStroke      | Simple mode               | 24 | 1.0124 | 0.9533 | 1.0750 | 0.6923 | 0.0077  | 0.0071 | 0.2914 | 24.7662 | 0.3625 | -38.9886   |
| g_Mobiluncus  | IschemicStroke      | Weighted mode             | 24 | 1.0048 | 0.9566 | 1.0553 | 0.8513 | 0.0077  | 0.0071 | 0.2914 | 24.7662 | 0.3625 | -38.9886   |
| g_Mobiluncus  | LargeArteryStroke   | MR Egger                  | 18 | 1.0360 | 0.8630 | 1.2439 | 0.7092 | 0.0041  | 0.0293 | 0.8911 | 23.2801 | 0.1064 | -18.5299   |
| g_Mobiluncus  | LargeArteryStroke   | Weighted median           | 18 | 1.0347 | 0.9262 | 1.1559 | 0.5459 | 0.0041  | 0.0293 | 0.8911 | 23.2801 | 0.1064 | -18.5299   |
| g_Mobiluncus  | LargeArteryStroke   | Inverse variance weighted | 18 | 1.0478 | 0.9609 | 1.1426 | 0.2901 | 0.0041  | 0.0293 | 0.8911 | 23.2801 | 0.1064 | -18.5299   |
| g_Mobiluncus  | LargeArteryStroke   | Simple mode               | 18 | 1.0194 | 0.8494 | 1.2233 | 0.8390 | 0.0041  | 0.0293 | 0.8911 | 23.2801 | 0.1064 | -18.5299   |
| g_Mobiluncus  | LargeArteryStroke   | Weighted mode             | 18 | 1.0194 | 0.8832 | 1.1766 | 0.7962 | 0.0041  | 0.0293 | 0.8911 | 23.2801 | 0.1064 | -18.5299   |
| g_Mobiluncus  | SmallVesselStroke   | MR Egger                  | 19 | 0.9485 | 0.8743 | 1.0290 | 0.2203 | 0.0090  | 0.0132 | 0.5039 | 14.7037 | 0.6168 | -56.6023   |
| g_Mobiluncus  | SmallVesselStroke   | Weighted median           | 19 | 0.9749 | 0.9226 | 1.0301 | 0.3655 | 0.0090  | 0.0132 | 0.5039 | 14.7037 | 0.6168 | -56.6023   |
| g_Mobiluncus  | SmallVesselStroke   | Inverse variance weighted | 19 | 0.9722 | 0.9337 | 1.0122 | 0.1703 | 0.0090  | 0.0132 | 0.5039 | 14.7037 | 0.6168 | -56.6023   |

|                |                     |                           |    |        |        |        |        |         |        |        |         |        |             |
|----------------|---------------------|---------------------------|----|--------|--------|--------|--------|---------|--------|--------|---------|--------|-------------|
| g_Mobiluncus   | SmallVesselStroke   | Simple mode               | 19 | 0.9756 | 0.8904 | 1.0689 | 0.6020 | 0.0090  | 0.0132 | 0.5039 | 14.7037 | 0.6168 | -56.6023    |
| g_Mobiluncus   | SmallVesselStroke   | Weighted mode             | 19 | 0.9736 | 0.9125 | 1.0388 | 0.4295 | 0.0090  | 0.0132 | 0.5039 | 14.7037 | 0.6168 | -56.6023    |
| g_Mobiluncus   | Stroke              | MR Egger                  | 24 | 1.0008 | 0.9594 | 1.0439 | 0.9720 | 0.0014  | 0.0068 | 0.8418 | 25.1523 | 0.2898 | -53.1117    |
| g_Mobiluncus   | Stroke              | Weighted median           | 24 | 1.0062 | 0.9774 | 1.0358 | 0.6771 | 0.0014  | 0.0068 | 0.8418 | 25.1523 | 0.2898 | -53.1117    |
| g_Mobiluncus   | Stroke              | Inverse variance weighted | 24 | 1.0046 | 0.9847 | 1.0248 | 0.6532 | 0.0014  | 0.0068 | 0.8418 | 25.1523 | 0.2898 | -53.1117    |
| g_Mobiluncus   | Stroke              | Simple mode               | 24 | 1.0009 | 0.9456 | 1.0594 | 0.9763 | 0.0014  | 0.0068 | 0.8418 | 25.1523 | 0.2898 | -53.1117    |
| g_Mobiluncus   | Stroke              | Weighted mode             | 24 | 0.9994 | 0.9568 | 1.0440 | 0.9804 | 0.0014  | 0.0068 | 0.8418 | 25.1523 | 0.2898 | -53.1117    |
| g_Odoribacter  | CardioEmbolicStroke | MR Egger                  | 5  | 0.7380 | 0.1327 | 4.1045 | 0.7515 | 0.1064  | 0.2123 | 0.6507 | 2.3638  | 0.5004 | 58.4055     |
| g_Odoribacter  | CardioEmbolicStroke | Weighted median           | 5  | 1.2083 | 0.9255 | 1.5774 | 0.1643 | 0.1064  | 0.2123 | 0.6507 | 2.3638  | 0.5004 | 58.4055     |
| g_Odoribacter  | CardioEmbolicStroke | Inverse variance weighted | 5  | 1.1409 | 0.9310 | 1.3982 | 0.2038 | 0.1064  | 0.2123 | 0.6507 | 2.3638  | 0.5004 | 58.4055     |
| g_Odoribacter  | CardioEmbolicStroke | Simple mode               | 5  | 1.2660 | 0.8924 | 1.7961 | 0.2567 | 0.1064  | 0.2123 | 0.6507 | 2.3638  | 0.5004 | 58.4055     |
| g_Odoribacter  | CardioEmbolicStroke | Weighted mode             | 5  | 1.2603 | 0.8931 | 1.7784 | 0.2583 | 0.1064  | 0.2123 | 0.6507 | 2.3638  | 0.5004 | 58.4055     |
| g_Odoribacter  | IschemicStroke      | MR Egger                  | 13 | 0.9717 | 0.9147 | 1.0323 | 0.3717 | 0.0085  | 0.0106 | 0.4409 | 6.7715  | 0.8173 | -89.3113    |
| g_Odoribacter  | IschemicStroke      | Weighted median           | 13 | 0.9877 | 0.9462 | 1.0311 | 0.5727 | 0.0085  | 0.0106 | 0.4409 | 6.7715  | 0.8173 | -89.3113    |
| g_Odoribacter  | IschemicStroke      | Inverse variance weighted | 13 | 0.9926 | 0.9626 | 1.0235 | 0.6331 | 0.0085  | 0.0106 | 0.4409 | 6.7715  | 0.8173 | -89.3113    |
| g_Odoribacter  | IschemicStroke      | Simple mode               | 13 | 0.9586 | 0.8889 | 1.0337 | 0.2933 | 0.0085  | 0.0106 | 0.4409 | 6.7715  | 0.8173 | -89.3113    |
| g_Odoribacter  | IschemicStroke      | Weighted mode             | 13 | 0.9639 | 0.9045 | 1.0272 | 0.2796 | 0.0085  | 0.0106 | 0.4409 | 6.7715  | 0.8173 | -89.3113    |
| g_Odoribacter  | LargeArteryStroke   | MR Egger                  | 7  | 1.1994 | 0.7433 | 1.9354 | 0.4899 | -0.0481 | 0.0649 | 0.4922 | 3.3195  | 0.6509 | -49673.4308 |
| g_Odoribacter  | LargeArteryStroke   | Weighted median           | 7  | 0.9931 | 0.8369 | 1.1785 | 0.9370 | -0.0481 | 0.0649 | 0.4922 | 3.3195  | 0.6509 | -49673.4308 |
| g_Odoribacter  | LargeArteryStroke   | Inverse variance weighted | 7  | 1.0084 | 0.8812 | 1.1539 | 0.9034 | -0.0481 | 0.0649 | 0.4922 | 3.3195  | 0.6509 | -49673.4308 |
| g_Odoribacter  | LargeArteryStroke   | Simple mode               | 7  | 0.9634 | 0.7552 | 1.2288 | 0.7739 | -0.0481 | 0.0649 | 0.4922 | 3.3195  | 0.6509 | -49673.4308 |
| g_Odoribacter  | LargeArteryStroke   | Weighted mode             | 7  | 0.9708 | 0.7734 | 1.2186 | 0.8068 | -0.0481 | 0.0649 | 0.4922 | 3.3195  | 0.6509 | -49673.4308 |
| g_Odoribacter  | SmallVesselStroke   | MR Egger                  | 8  | 0.9955 | 0.8452 | 1.1726 | 0.9590 | -0.0160 | 0.0258 | 0.5582 | 9.5331  | 0.1457 | -88.7864    |
| g_Odoribacter  | SmallVesselStroke   | Weighted median           | 8  | 0.9940 | 0.9115 | 1.0839 | 0.8915 | -0.0160 | 0.0258 | 0.5582 | 9.5331  | 0.1457 | -88.7864    |
| g_Odoribacter  | SmallVesselStroke   | Inverse variance weighted | 8  | 0.9517 | 0.8810 | 1.0281 | 0.2091 | -0.0160 | 0.0258 | 0.5582 | 9.5331  | 0.1457 | -88.7864    |
| g_Odoribacter  | SmallVesselStroke   | Simple mode               | 8  | 0.9847 | 0.8403 | 1.1539 | 0.8541 | -0.0160 | 0.0258 | 0.5582 | 9.5331  | 0.1457 | -88.7864    |
| g_Odoribacter  | SmallVesselStroke   | Weighted mode             | 8  | 1.0152 | 0.9156 | 1.1257 | 0.7832 | -0.0160 | 0.0258 | 0.5582 | 9.5331  | 0.1457 | -88.7864    |
| g_Odoribacter  | Stroke              | MR Egger                  | 12 | 0.9998 | 0.9300 | 1.0749 | 0.9958 | -0.0003 | 0.0115 | 0.9798 | 4.6810  | 0.9114 | -328.7307   |
| g_Odoribacter  | Stroke              | Weighted median           | 12 | 0.9985 | 0.9615 | 1.0370 | 0.9391 | -0.0003 | 0.0115 | 0.9798 | 4.6810  | 0.9114 | -328.7307   |
| g_Odoribacter  | Stroke              | Inverse variance weighted | 12 | 0.9989 | 0.9703 | 1.0284 | 0.9420 | -0.0003 | 0.0115 | 0.9798 | 4.6810  | 0.9114 | -328.7307   |
| g_Odoribacter  | Stroke              | Simple mode               | 12 | 0.9958 | 0.9370 | 1.0582 | 0.8941 | -0.0003 | 0.0115 | 0.9798 | 4.6810  | 0.9114 | -328.7307   |
| g_Odoribacter  | Stroke              | Weighted mode             | 12 | 0.9978 | 0.9420 | 1.0570 | 0.9425 | -0.0003 | 0.0115 | 0.9798 | 4.6810  | 0.9114 | -328.7307   |
| g_Oribacterium | CardioEmbolicStroke | MR Egger                  | 11 | 1.2189 | 0.4056 | 3.6632 | 0.7325 | -0.0483 | 0.0989 | 0.6368 | 5.6371  | 0.7756 | 60.3940     |
| g_Oribacterium | CardioEmbolicStroke | Weighted median           | 11 | 0.9287 | 0.7065 | 1.2208 | 0.5961 | -0.0483 | 0.0989 | 0.6368 | 5.6371  | 0.7756 | 60.3940     |
| g_Oribacterium | CardioEmbolicStroke | Inverse variance weighted | 11 | 0.9309 | 0.7585 | 1.1425 | 0.4932 | -0.0483 | 0.0989 | 0.6368 | 5.6371  | 0.7756 | 60.3940     |
| g_Oribacterium | CardioEmbolicStroke | Simple mode               | 11 | 0.8274 | 0.5203 | 1.3160 | 0.4422 | -0.0483 | 0.0989 | 0.6368 | 5.6371  | 0.7756 | 60.3940     |
| g_Oribacterium | CardioEmbolicStroke | Weighted mode             | 11 | 0.8813 | 0.5466 | 1.4209 | 0.6154 | -0.0483 | 0.0989 | 0.6368 | 5.6371  | 0.7756 | 60.3940     |
| g_Oribacterium | IschemicStroke      | MR Egger                  | 18 | 0.9969 | 0.9290 | 1.0697 | 0.9319 | -0.0057 | 0.0084 | 0.5042 | 11.5008 | 0.7776 | -248.5480   |
| g_Oribacterium | IschemicStroke      | Weighted median           | 18 | 0.9676 | 0.9227 | 1.0146 | 0.1736 | -0.0057 | 0.0084 | 0.5042 | 11.5008 | 0.7776 | -248.5480   |
| g_Oribacterium | IschemicStroke      | Inverse variance weighted | 18 | 0.9756 | 0.9431 | 1.0093 | 0.1542 | -0.0057 | 0.0084 | 0.5042 | 11.5008 | 0.7776 | -248.5480   |
| g_Oribacterium | IschemicStroke      | Simple mode               | 18 | 0.9420 | 0.8636 | 1.0275 | 0.1956 | -0.0057 | 0.0084 | 0.5042 | 11.5008 | 0.7776 | -248.5480   |
| g_Oribacterium | IschemicStroke      | Weighted mode             | 18 | 0.9564 | 0.8868 | 1.0314 | 0.2631 | -0.0057 | 0.0084 | 0.5042 | 11.5008 | 0.7776 | -248.5480   |
| g_Oribacterium | LargeArteryStroke   | MR Egger                  | 16 | 0.9306 | 0.6536 | 1.3249 | 0.6957 | -0.0011 | 0.0388 | 0.9768 | 21.5010 | 0.0895 | -66.7359    |
| g_Oribacterium | LargeArteryStroke   | Weighted median           | 16 | 0.8210 | 0.6923 | 0.9737 | 0.0234 | -0.0011 | 0.0388 | 0.9768 | 21.5010 | 0.0895 | -66.7359    |
| g_Oribacterium | LargeArteryStroke   | Inverse variance weighted | 16 | 0.9261 | 0.8018 | 1.0695 | 0.2959 | -0.0011 | 0.0388 | 0.9768 | 21.5010 | 0.0895 | -66.7359    |
| g_Oribacterium | LargeArteryStroke   | Simple mode               | 16 | 0.7806 | 0.6063 | 1.0051 | 0.0740 | -0.0011 | 0.0388 | 0.9768 | 21.5010 | 0.0895 | -66.7359    |
| g_Oribacterium | LargeArteryStroke   | Weighted mode             | 16 | 0.7852 | 0.6314 | 0.9764 | 0.0461 | -0.0011 | 0.0388 | 0.9768 | 21.5010 | 0.0895 | -66.7359    |
| g_Oribacterium | SmallVesselStroke   | MR Egger                  | 16 | 1.0283 | 0.8782 | 1.2041 | 0.7339 | -0.0057 | 0.0174 | 0.7468 | 12.4895 | 0.5671 | -581.2916   |
| g_Oribacterium | SmallVesselStroke   | Weighted median           | 16 | 1.0220 | 0.9320 | 1.1208 | 0.6433 | -0.0057 | 0.0174 | 0.7468 | 12.4895 | 0.5671 | -581.2916   |
| g_Oribacterium | SmallVesselStroke   | Inverse variance weighted | 16 | 1.0039 | 0.9391 | 1.0732 | 0.9089 | -0.0057 | 0.0174 | 0.7468 | 12.4895 | 0.5671 | -581.2916   |
| g_Oribacterium | SmallVesselStroke   | Simple mode               | 16 | 0.9790 | 0.8343 | 1.1487 | 0.7979 | -0.0057 | 0.0174 | 0.7468 | 12.4895 | 0.5671 | -581.2916   |
| g_Oribacterium | SmallVesselStroke   | Weighted mode             | 16 | 1.0188 | 0.8862 | 1.1712 | 0.7974 | -0.0057 | 0.0174 | 0.7468 | 12.4895 | 0.5671 | -581.2916   |
| g_Oribacterium | Stroke              | MR Egger                  | 18 | 0.9905 | 0.9293 | 1.0557 | 0.7734 | -0.0026 | 0.0074 | 0.7296 | 10.2374 | 0.8539 | -335.0773   |

|                 |                     |                           |    |        |        |        |        |         |        |        |         |        |           |
|-----------------|---------------------|---------------------------|----|--------|--------|--------|--------|---------|--------|--------|---------|--------|-----------|
| g_Oribacterium  | Stroke              | Weighted median           | 18 | 0.9739 | 0.9341 | 1.0155 | 0.2152 | -0.0026 | 0.0074 | 0.7296 | 10.2374 | 0.8539 | -335.0773 |
| g_Oribacterium  | Stroke              | Inverse variance weighted | 18 | 0.9806 | 0.9516 | 1.0104 | 0.1999 | -0.0026 | 0.0074 | 0.7296 | 10.2374 | 0.8539 | -335.0773 |
| g_Oribacterium  | Stroke              | Simple mode               | 18 | 0.9586 | 0.8902 | 1.0322 | 0.2780 | -0.0026 | 0.0074 | 0.7296 | 10.2374 | 0.8539 | -335.0773 |
| g_Oribacterium  | Stroke              | Weighted mode             | 18 | 0.9665 | 0.9045 | 1.0328 | 0.3285 | -0.0026 | 0.0074 | 0.7296 | 10.2374 | 0.8539 | -335.0773 |
| g_Oscillibacter | CardioEmbolicStroke | MR Egger                  | 5  | 0.9555 | 0.6268 | 1.4567 | 0.8460 | 0.0285  | 0.1016 | 0.7972 | 2.9352  | 0.4017 | -283.4187 |
| g_Oscillibacter | CardioEmbolicStroke | Weighted median           | 5  | 1.0201 | 0.8036 | 1.2949 | 0.8699 | 0.0285  | 0.1016 | 0.7972 | 2.9352  | 0.4017 | -283.4187 |
| g_Oscillibacter | CardioEmbolicStroke | Inverse variance weighted | 5  | 1.0095 | 0.8473 | 1.2026 | 0.9161 | 0.0285  | 0.1016 | 0.7972 | 2.9352  | 0.4017 | -283.4187 |
| g_Oscillibacter | CardioEmbolicStroke | Simple mode               | 5  | 0.8744 | 0.6257 | 1.2219 | 0.4758 | 0.0285  | 0.1016 | 0.7972 | 2.9352  | 0.4017 | -283.4187 |
| g_Oscillibacter | CardioEmbolicStroke | Weighted mode             | 5  | 0.8963 | 0.6588 | 1.2196 | 0.5244 | 0.0285  | 0.1016 | 0.7972 | 2.9352  | 0.4017 | -283.4187 |
| g_Oscillibacter | IschemicStroke      | MR Egger                  | 20 | 1.0068 | 0.9698 | 1.0453 | 0.7257 | 0.0053  | 0.0133 | 0.6923 | 23.8573 | 0.1598 | -17.1698  |
| g_Oscillibacter | IschemicStroke      | Weighted median           | 20 | 1.0151 | 0.9891 | 1.0418 | 0.2567 | 0.0053  | 0.0133 | 0.6923 | 23.8573 | 0.1598 | -17.1698  |
| g_Oscillibacter | IschemicStroke      | Inverse variance weighted | 20 | 1.0134 | 0.9935 | 1.0337 | 0.1887 | 0.0053  | 0.0133 | 0.6923 | 23.8573 | 0.1598 | -17.1698  |
| g_Oscillibacter | IschemicStroke      | Simple mode               | 20 | 1.0156 | 0.9725 | 1.0607 | 0.4928 | 0.0053  | 0.0133 | 0.6923 | 23.8573 | 0.1598 | -17.1698  |
| g_Oscillibacter | IschemicStroke      | Weighted mode             | 20 | 1.0108 | 0.9791 | 1.0434 | 0.5171 | 0.0053  | 0.0133 | 0.6923 | 23.8573 | 0.1598 | -17.1698  |
| g_Oscillibacter | LargeArteryStroke   | MR Egger                  | 13 | 1.0813 | 0.9447 | 1.2376 | 0.2809 | -0.0363 | 0.0502 | 0.4846 | 8.0431  | 0.7094 | -9.7401   |
| g_Oscillibacter | LargeArteryStroke   | Weighted median           | 13 | 1.0174 | 0.9247 | 1.1194 | 0.7237 | -0.0363 | 0.0502 | 0.4846 | 8.0431  | 0.7094 | -9.7401   |
| g_Oscillibacter | LargeArteryStroke   | Inverse variance weighted | 13 | 1.0355 | 0.9683 | 1.1073 | 0.3080 | -0.0363 | 0.0502 | 0.4846 | 8.0431  | 0.7094 | -9.7401   |
| g_Oscillibacter | LargeArteryStroke   | Simple mode               | 13 | 1.0037 | 0.8615 | 1.1694 | 0.9627 | -0.0363 | 0.0502 | 0.4846 | 8.0431  | 0.7094 | -9.7401   |
| g_Oscillibacter | LargeArteryStroke   | Weighted mode             | 13 | 1.0183 | 0.9026 | 1.1489 | 0.7729 | -0.0363 | 0.0502 | 0.4846 | 8.0431  | 0.7094 | -9.7401   |
| g_Oscillibacter | SmallVesselStroke   | MR Egger                  | 15 | 0.9780 | 0.9029 | 1.0593 | 0.5942 | 0.0441  | 0.0316 | 0.1855 | 21.1874 | 0.0969 | -12.1610  |
| g_Oscillibacter | SmallVesselStroke   | Weighted median           | 15 | 1.0062 | 0.9561 | 1.0590 | 0.8115 | 0.0441  | 0.0316 | 0.1855 | 21.1874 | 0.0969 | -12.1610  |
| g_Oscillibacter | SmallVesselStroke   | Inverse variance weighted | 15 | 1.0271 | 0.9847 | 1.0714 | 0.2144 | 0.0441  | 0.0316 | 0.1855 | 21.1874 | 0.0969 | -12.1610  |
| g_Oscillibacter | SmallVesselStroke   | Simple mode               | 15 | 0.9809 | 0.9059 | 1.0623 | 0.6432 | 0.0441  | 0.0316 | 0.1855 | 21.1874 | 0.0969 | -12.1610  |
| g_Oscillibacter | SmallVesselStroke   | Weighted mode             | 15 | 0.9936 | 0.9438 | 1.0461 | 0.8115 | 0.0441  | 0.0316 | 0.1855 | 21.1874 | 0.0969 | -12.1610  |
| g_Oscillibacter | Stroke              | MR Egger                  | 22 | 1.0047 | 0.9628 | 1.0484 | 0.8315 | 0.0037  | 0.0123 | 0.7641 | 25.8067 | 0.1723 | -17.5769  |
| g_Oscillibacter | Stroke              | Weighted median           | 22 | 1.0174 | 0.9899 | 1.0457 | 0.2175 | 0.0037  | 0.0123 | 0.7641 | 25.8067 | 0.1723 | -17.5769  |
| g_Oscillibacter | Stroke              | Inverse variance weighted | 22 | 1.0105 | 0.9899 | 1.0315 | 0.3198 | 0.0037  | 0.0123 | 0.7641 | 25.8067 | 0.1723 | -17.5769  |
| g_Oscillibacter | Stroke              | Simple mode               | 22 | 1.0301 | 0.9755 | 1.0876 | 0.2982 | 0.0037  | 0.0123 | 0.7641 | 25.8067 | 0.1723 | -17.5769  |
| g_Oscillibacter | Stroke              | Weighted mode             | 22 | 1.0254 | 0.9746 | 1.0789 | 0.3446 | 0.0037  | 0.0123 | 0.7641 | 25.8067 | 0.1723 | -17.5769  |
| g_Oxalobacter   | CardioEmbolicStroke | MR Egger                  | 12 | 1.0146 | 0.7331 | 1.4042 | 0.9321 | -0.0176 | 0.0761 | 0.8216 | 5.8436  | 0.8282 | -80.5966  |
| g_Oxalobacter   | CardioEmbolicStroke | Weighted median           | 12 | 1.0278 | 0.9199 | 1.1485 | 0.6277 | -0.0176 | 0.0761 | 0.8216 | 5.8436  | 0.8282 | -80.5966  |
| g_Oxalobacter   | CardioEmbolicStroke | Inverse variance weighted | 12 | 0.9776 | 0.8995 | 1.0625 | 0.5946 | -0.0176 | 0.0761 | 0.8216 | 5.8436  | 0.8282 | -80.5966  |
| g_Oxalobacter   | CardioEmbolicStroke | Simple mode               | 12 | 1.0319 | 0.8747 | 1.2173 | 0.7167 | -0.0176 | 0.0761 | 0.8216 | 5.8436  | 0.8282 | -80.5966  |
| g_Oxalobacter   | CardioEmbolicStroke | Weighted mode             | 12 | 1.0319 | 0.8702 | 1.2237 | 0.7250 | -0.0176 | 0.0761 | 0.8216 | 5.8436  | 0.8282 | -80.5966  |
| g_Oxalobacter   | IschemicStroke      | MR Egger                  | 16 | 1.0077 | 0.9491 | 1.0700 | 0.8047 | -0.0089 | 0.0149 | 0.5598 | 15.0329 | 0.3759 | -81.3069  |
| g_Oxalobacter   | IschemicStroke      | Weighted median           | 16 | 0.9960 | 0.9728 | 1.0198 | 0.7413 | -0.0089 | 0.0149 | 0.5598 | 15.0329 | 0.3759 | -81.3069  |
| g_Oxalobacter   | IschemicStroke      | Inverse variance weighted | 16 | 0.9903 | 0.9731 | 1.0079 | 0.2772 | -0.0089 | 0.0149 | 0.5598 | 15.0329 | 0.3759 | -81.3069  |
| g_Oxalobacter   | IschemicStroke      | Simple mode               | 16 | 1.0028 | 0.9621 | 1.0453 | 0.8960 | -0.0089 | 0.0149 | 0.5598 | 15.0329 | 0.3759 | -81.3069  |
| g_Oxalobacter   | IschemicStroke      | Weighted mode             | 16 | 1.0011 | 0.9647 | 1.0390 | 0.9528 | -0.0089 | 0.0149 | 0.5598 | 15.0329 | 0.3759 | -81.3069  |
| g_Oxalobacter   | LargeArteryStroke   | MR Egger                  | 15 | 0.8121 | 0.6480 | 1.0178 | 0.0939 | 0.0944  | 0.0562 | 0.1167 | 22.9030 | 0.0619 | -11.9096  |
| g_Oxalobacter   | LargeArteryStroke   | Weighted median           | 15 | 1.0017 | 0.9239 | 1.0859 | 0.9677 | 0.0944  | 0.0562 | 0.1167 | 22.9030 | 0.0619 | -11.9096  |
| g_Oxalobacter   | LargeArteryStroke   | Inverse variance weighted | 15 | 0.9767 | 0.9084 | 1.0501 | 0.5232 | 0.0944  | 0.0562 | 0.1167 | 22.9030 | 0.0619 | -11.9096  |
| g_Oxalobacter   | LargeArteryStroke   | Simple mode               | 15 | 1.0415 | 0.8837 | 1.2275 | 0.6350 | 0.0944  | 0.0562 | 0.1167 | 22.9030 | 0.0619 | -11.9096  |
| g_Oxalobacter   | LargeArteryStroke   | Weighted mode             | 15 | 1.0550 | 0.9223 | 1.2069 | 0.4478 | 0.0944  | 0.0562 | 0.1167 | 22.9030 | 0.0619 | -11.9096  |
| g_Oxalobacter   | SmallVesselStroke   | MR Egger                  | 16 | 1.0798 | 0.9721 | 1.1994 | 0.1738 | -0.0437 | 0.0261 | 0.1165 | 14.8311 | 0.4636 | -36.1212  |
| g_Oxalobacter   | SmallVesselStroke   | Weighted median           | 16 | 0.9851 | 0.9431 | 1.0291 | 0.5012 | -0.0437 | 0.0261 | 0.1165 | 14.8311 | 0.4636 | -36.1212  |
| g_Oxalobacter   | SmallVesselStroke   | Inverse variance weighted | 16 | 0.9913 | 0.9606 | 1.0229 | 0.5835 | -0.0437 | 0.0261 | 0.1165 | 14.8311 | 0.4636 | -36.1212  |
| g_Oxalobacter   | SmallVesselStroke   | Simple mode               | 16 | 0.9758 | 0.9044 | 1.0529 | 0.5378 | -0.0437 | 0.0261 | 0.1165 | 14.8311 | 0.4636 | -36.1212  |
| g_Oxalobacter   | SmallVesselStroke   | Weighted mode             | 16 | 0.9731 | 0.9018 | 1.0500 | 0.4935 | -0.0437 | 0.0261 | 0.1165 | 14.8311 | 0.4636 | -36.1212  |
| g_Oxalobacter   | Stroke              | MR Egger                  | 16 | 1.0110 | 0.9573 | 1.0678 | 0.7000 | -0.0070 | 0.0137 | 0.6158 | 17.5719 | 0.2270 | -93.9564  |
| g_Oxalobacter   | Stroke              | Weighted median           | 16 | 0.9977 | 0.9777 | 1.0181 | 0.8218 | -0.0070 | 0.0137 | 0.6158 | 17.5719 | 0.2270 | -93.9564  |
| g_Oxalobacter   | Stroke              | Inverse variance weighted | 16 | 0.9973 | 0.9816 | 1.0133 | 0.7405 | -0.0070 | 0.0137 | 0.6158 | 17.5719 | 0.2270 | -93.9564  |
| g_Oxalobacter   | Stroke              | Simple mode               | 16 | 0.9968 | 0.9625 | 1.0323 | 0.8594 | -0.0070 | 0.0137 | 0.6158 | 17.5719 | 0.2270 | -93.9564  |

|                   |                     |                           |    |        |        |        |        |         |        |        |         |        |           |
|-------------------|---------------------|---------------------------|----|--------|--------|--------|--------|---------|--------|--------|---------|--------|-----------|
| g_Oxalobacter     | Stroke              | Weighted mode             | 16 | 0.9958 | 0.9646 | 1.0281 | 0.8003 | -0.0070 | 0.0137 | 0.6158 | 17.5719 | 0.2270 | -93.9564  |
| g_Parabacteroides | CardioEmbolicStroke | MR Egger                  | 11 | 1.3731 | 0.8504 | 2.2170 | 0.2269 | -0.0411 | 0.0500 | 0.4325 | 4.2130  | 0.8968 | 399.2385  |
| g_Parabacteroides | CardioEmbolicStroke | Weighted median           | 11 | 1.0801 | 0.8368 | 1.3941 | 0.5542 | -0.0411 | 0.0500 | 0.4325 | 4.2130  | 0.8968 | 399.2385  |
| g_Parabacteroides | CardioEmbolicStroke | Inverse variance weighted | 11 | 1.1436 | 0.9381 | 1.3940 | 0.1842 | -0.0411 | 0.0500 | 0.4325 | 4.2130  | 0.8968 | 399.2385  |
| g_Parabacteroides | CardioEmbolicStroke | Simple mode               | 11 | 0.9983 | 0.6578 | 1.5150 | 0.9938 | -0.0411 | 0.0500 | 0.4325 | 4.2130  | 0.8968 | 399.2385  |
| g_Parabacteroides | CardioEmbolicStroke | Weighted mode             | 11 | 1.0091 | 0.7055 | 1.4434 | 0.9614 | -0.0411 | 0.0500 | 0.4325 | 4.2130  | 0.8968 | 399.2385  |
| g_Parabacteroides | IschemicStroke      | MR Egger                  | 17 | 1.0049 | 0.9459 | 1.0677 | 0.8758 | -0.0079 | 0.0082 | 0.3468 | 12.8674 | 0.6125 | -203.5266 |
| g_Parabacteroides | IschemicStroke      | Weighted median           | 17 | 0.9858 | 0.9414 | 1.0323 | 0.5429 | -0.0079 | 0.0082 | 0.3468 | 12.8674 | 0.6125 | -203.5266 |
| g_Parabacteroides | IschemicStroke      | Inverse variance weighted | 17 | 0.9801 | 0.9477 | 1.0137 | 0.2424 | -0.0079 | 0.0082 | 0.3468 | 12.8674 | 0.6125 | -203.5266 |
| g_Parabacteroides | IschemicStroke      | Simple mode               | 17 | 0.9493 | 0.8756 | 1.0291 | 0.2247 | -0.0079 | 0.0082 | 0.3468 | 12.8674 | 0.6125 | -203.5266 |
| g_Parabacteroides | IschemicStroke      | Weighted mode             | 17 | 0.9815 | 0.9249 | 1.0415 | 0.5459 | -0.0079 | 0.0082 | 0.3468 | 12.8674 | 0.6125 | -203.5266 |
| g_Parabacteroides | LargeArteryStroke   | MR Egger                  | 13 | 0.8593 | 0.6252 | 1.1811 | 0.3703 | 0.0320  | 0.0393 | 0.4320 | 20.4717 | 0.0393 | -238.4560 |
| g_Parabacteroides | LargeArteryStroke   | Weighted median           | 13 | 0.8900 | 0.7540 | 1.0506 | 0.1687 | 0.0320  | 0.0393 | 0.4320 | 20.4717 | 0.0393 | -238.4560 |
| g_Parabacteroides | LargeArteryStroke   | Inverse variance weighted | 13 | 0.9622 | 0.8173 | 1.1327 | 0.6431 | 0.0320  | 0.0393 | 0.4320 | 20.4717 | 0.0393 | -238.4560 |
| g_Parabacteroides | LargeArteryStroke   | Simple mode               | 13 | 0.8722 | 0.6741 | 1.1286 | 0.3190 | 0.0320  | 0.0393 | 0.4320 | 20.4717 | 0.0393 | -238.4560 |
| g_Parabacteroides | LargeArteryStroke   | Weighted mode             | 13 | 0.8930 | 0.7339 | 1.0865 | 0.2801 | 0.0320  | 0.0393 | 0.4320 | 20.4717 | 0.0393 | -238.4560 |
| g_Parabacteroides | SmallVesselStroke   | MR Egger                  | 15 | 1.0219 | 0.8914 | 1.1715 | 0.7612 | -0.0111 | 0.0180 | 0.5496 | 18.8509 | 0.1278 | -78.1596  |
| g_Parabacteroides | SmallVesselStroke   | Weighted median           | 15 | 1.0627 | 0.9669 | 1.1680 | 0.2071 | -0.0111 | 0.0180 | 0.5496 | 18.8509 | 0.1278 | -78.1596  |
| g_Parabacteroides | SmallVesselStroke   | Inverse variance weighted | 15 | 0.9860 | 0.9160 | 1.0614 | 0.7079 | -0.0111 | 0.0180 | 0.5496 | 18.8509 | 0.1278 | -78.1596  |
| g_Parabacteroides | SmallVesselStroke   | Simple mode               | 15 | 1.0451 | 0.8815 | 1.2392 | 0.6193 | -0.0111 | 0.0180 | 0.5496 | 18.8509 | 0.1278 | -78.1596  |
| g_Parabacteroides | SmallVesselStroke   | Weighted mode             | 15 | 1.0759 | 0.9491 | 1.2196 | 0.2720 | -0.0111 | 0.0180 | 0.5496 | 18.8509 | 0.1278 | -78.1596  |
| g_Parabacteroides | Stroke              | MR Egger                  | 17 | 0.9849 | 0.9262 | 1.0474 | 0.6357 | -0.0016 | 0.0075 | 0.8347 | 12.4577 | 0.6441 | -389.4723 |
| g_Parabacteroides | Stroke              | Weighted median           | 17 | 0.9691 | 0.9272 | 1.0128 | 0.1635 | -0.0016 | 0.0075 | 0.8347 | 12.4577 | 0.6441 | -389.4723 |
| g_Parabacteroides | Stroke              | Inverse variance weighted | 17 | 0.9793 | 0.9488 | 1.0109 | 0.1966 | -0.0016 | 0.0075 | 0.8347 | 12.4577 | 0.6441 | -389.4723 |
| g_Parabacteroides | Stroke              | Simple mode               | 17 | 0.9547 | 0.8937 | 1.0198 | 0.1875 | -0.0016 | 0.0075 | 0.8347 | 12.4577 | 0.6441 | -389.4723 |
| g_Parabacteroides | Stroke              | Weighted mode             | 17 | 0.9678 | 0.9100 | 1.0292 | 0.3122 | -0.0016 | 0.0075 | 0.8347 | 12.4577 | 0.6441 | -389.4723 |
| g_Paraprevotella  | CardioEmbolicStroke | MR Egger                  | 15 | 0.7418 | 0.4314 | 1.2756 | 0.2998 | 0.0495  | 0.0761 | 0.5266 | 6.3677  | 0.9317 | -367.8204 |
| g_Paraprevotella  | CardioEmbolicStroke | Weighted median           | 15 | 0.8952 | 0.7641 | 1.0487 | 0.1705 | 0.0495  | 0.0761 | 0.5266 | 6.3677  | 0.9317 | -367.8204 |
| g_Paraprevotella  | CardioEmbolicStroke | Inverse variance weighted | 15 | 0.8840 | 0.7826 | 0.9984 | 0.0471 | 0.0495  | 0.0761 | 0.5266 | 6.3677  | 0.9317 | -367.8204 |
| g_Paraprevotella  | CardioEmbolicStroke | Simple mode               | 15 | 0.9206 | 0.7077 | 1.1976 | 0.5474 | 0.0495  | 0.0761 | 0.5266 | 6.3677  | 0.9317 | -367.8204 |
| g_Paraprevotella  | CardioEmbolicStroke | Weighted mode             | 15 | 0.9055 | 0.7061 | 1.1613 | 0.4472 | 0.0495  | 0.0761 | 0.5266 | 6.3677  | 0.9317 | -367.8204 |
| g_Paraprevotella  | IschemicStroke      | MR Egger                  | 25 | 0.9624 | 0.9020 | 1.0268 | 0.2584 | 0.0099  | 0.0107 | 0.3649 | 28.0158 | 0.2152 | -58.3390  |
| g_Paraprevotella  | IschemicStroke      | Weighted median           | 25 | 0.9759 | 0.9437 | 1.0092 | 0.1545 | 0.0099  | 0.0107 | 0.3649 | 28.0158 | 0.2152 | -58.3390  |
| g_Paraprevotella  | IschemicStroke      | Inverse variance weighted | 25 | 0.9900 | 0.9657 | 1.0148 | 0.4251 | 0.0099  | 0.0107 | 0.3649 | 28.0158 | 0.2152 | -58.3390  |
| g_Paraprevotella  | IschemicStroke      | Simple mode               | 25 | 0.9725 | 0.9050 | 1.0451 | 0.4555 | 0.0099  | 0.0107 | 0.3649 | 28.0158 | 0.2152 | -58.3390  |
| g_Paraprevotella  | IschemicStroke      | Weighted mode             | 25 | 0.9710 | 0.9086 | 1.0376 | 0.3931 | 0.0099  | 0.0107 | 0.3649 | 28.0158 | 0.2152 | -58.3390  |
| g_Paraprevotella  | LargeArteryStroke   | MR Egger                  | 22 | 0.9644 | 0.7546 | 1.2326 | 0.7754 | 0.0082  | 0.0383 | 0.8324 | 15.5544 | 0.7439 | -30.5538  |
| g_Paraprevotella  | LargeArteryStroke   | Weighted median           | 22 | 1.0179 | 0.9156 | 1.1317 | 0.7426 | 0.0082  | 0.0383 | 0.8324 | 15.5544 | 0.7439 | -30.5538  |
| g_Paraprevotella  | LargeArteryStroke   | Inverse variance weighted | 22 | 0.9893 | 0.9148 | 1.0698 | 0.7874 | 0.0082  | 0.0383 | 0.8324 | 15.5544 | 0.7439 | -30.5538  |
| g_Paraprevotella  | LargeArteryStroke   | Simple mode               | 22 | 1.0211 | 0.8398 | 1.2415 | 0.8362 | 0.0082  | 0.0383 | 0.8324 | 15.5544 | 0.7439 | -30.5538  |
| g_Paraprevotella  | LargeArteryStroke   | Weighted mode             | 22 | 1.0259 | 0.8527 | 1.2342 | 0.7891 | 0.0082  | 0.0383 | 0.8324 | 15.5544 | 0.7439 | -30.5538  |
| g_Paraprevotella  | SmallVesselStroke   | MR Egger                  | 22 | 0.8467 | 0.7234 | 0.9910 | 0.0514 | 0.0499  | 0.0246 | 0.0563 | 32.6861 | 0.0498 | -36.7817  |
| g_Paraprevotella  | SmallVesselStroke   | Weighted median           | 22 | 0.9997 | 0.9367 | 1.0669 | 0.9924 | 0.0499  | 0.0246 | 0.0563 | 32.6861 | 0.0498 | -36.7817  |
| g_Paraprevotella  | SmallVesselStroke   | Inverse variance weighted | 22 | 0.9877 | 0.9356 | 1.0427 | 0.6549 | 0.0499  | 0.0246 | 0.0563 | 32.6861 | 0.0498 | -36.7817  |
| g_Paraprevotella  | SmallVesselStroke   | Simple mode               | 22 | 0.9656 | 0.8355 | 1.1159 | 0.6400 | 0.0499  | 0.0246 | 0.0563 | 32.6861 | 0.0498 | -36.7817  |
| g_Paraprevotella  | SmallVesselStroke   | Weighted mode             | 22 | 1.0399 | 0.9147 | 1.1823 | 0.5564 | 0.0499  | 0.0246 | 0.0563 | 32.6861 | 0.0498 | -36.7817  |
| g_Paraprevotella  | Stroke              | MR Egger                  | 26 | 0.9471 | 0.9021 | 0.9944 | 0.0387 | 0.0176  | 0.0081 | 0.0394 | 25.0563 | 0.4592 | -73.1219  |
| g_Paraprevotella  | Stroke              | Weighted median           | 26 | 0.9925 | 0.9660 | 1.0196 | 0.5828 | 0.0176  | 0.0081 | 0.0394 | 25.0563 | 0.4592 | -73.1219  |
| g_Paraprevotella  | Stroke              | Inverse variance weighted | 26 | 0.9955 | 0.9769 | 1.0146 | 0.6439 | 0.0176  | 0.0081 | 0.0394 | 25.0563 | 0.4592 | -73.1219  |
| g_Paraprevotella  | Stroke              | Simple mode               | 26 | 0.9714 | 0.9215 | 1.0240 | 0.2917 | 0.0176  | 0.0081 | 0.0394 | 25.0563 | 0.4592 | -73.1219  |
| g_Paraprevotella  | Stroke              | Weighted mode             | 26 | 0.9707 | 0.9274 | 1.0161 | 0.2139 | 0.0176  | 0.0081 | 0.0394 | 25.0563 | 0.4592 | -73.1219  |
| g_Parasutterella  | CardioEmbolicStroke | MR Egger                  | 9  | 1.2086 | 0.8556 | 1.7072 | 0.3180 | -0.1180 | 0.1084 | 0.3124 | 17.9351 | 0.0217 | -13.0458  |
| g_Parasutterella  | CardioEmbolicStroke | Weighted median           | 9  | 0.9805 | 0.8882 | 1.0824 | 0.6960 | -0.1180 | 0.1084 | 0.3124 | 17.9351 | 0.0217 | -13.0458  |

|                         |                     |                           |    |        |        |        |        |         |        |        |         |        |           |
|-------------------------|---------------------|---------------------------|----|--------|--------|--------|--------|---------|--------|--------|---------|--------|-----------|
| g_Parasutterella        | CardioEmbolicStroke | Inverse variance weighted | 9  | 1.0061 | 0.9081 | 1.1147 | 0.9076 | -0.1180 | 0.1084 | 0.3124 | 17.9351 | 0.0217 | -13.0458  |
| g_Parasutterella        | CardioEmbolicStroke | Simple mode               | 9  | 0.9438 | 0.8088 | 1.1015 | 0.4841 | -0.1180 | 0.1084 | 0.3124 | 17.9351 | 0.0217 | -13.0458  |
| g_Parasutterella        | CardioEmbolicStroke | Weighted mode             | 9  | 0.9916 | 0.8594 | 1.1440 | 0.9103 | -0.1180 | 0.1084 | 0.3124 | 17.9351 | 0.0217 | -13.0458  |
| g_Parasutterella        | IschemicStroke      | MR Egger                  | 15 | 0.9981 | 0.9674 | 1.0299 | 0.9089 | 0.0022  | 0.0114 | 0.8526 | 4.1158  | 0.9899 | -50.6246  |
| g_Parasutterella        | IschemicStroke      | Weighted median           | 15 | 1.0000 | 0.9832 | 1.0171 | 0.9992 | 0.0022  | 0.0114 | 0.8526 | 4.1158  | 0.9899 | -50.6246  |
| g_Parasutterella        | IschemicStroke      | Inverse variance weighted | 15 | 1.0009 | 0.9877 | 1.0142 | 0.8964 | 0.0022  | 0.0114 | 0.8526 | 4.1158  | 0.9899 | -50.6246  |
| g_Parasutterella        | IschemicStroke      | Simple mode               | 15 | 1.0033 | 0.9772 | 1.0301 | 0.8100 | 0.0022  | 0.0114 | 0.8526 | 4.1158  | 0.9899 | -50.6246  |
| g_Parasutterella        | IschemicStroke      | Weighted mode             | 15 | 1.0015 | 0.9770 | 1.0267 | 0.9042 | 0.0022  | 0.0114 | 0.8526 | 4.1158  | 0.9899 | -50.6246  |
| g_Parasutterella        | LargeArteryStroke   | MR Egger                  | 11 | 1.0694 | 0.8806 | 1.2986 | 0.5154 | -0.0437 | 0.0630 | 0.5052 | 14.7084 | 0.0993 | -10.9772  |
| g_Parasutterella        | LargeArteryStroke   | Weighted median           | 11 | 1.0064 | 0.9394 | 1.0782 | 0.8560 | -0.0437 | 0.0630 | 0.5052 | 14.7084 | 0.0993 | -10.9772  |
| g_Parasutterella        | LargeArteryStroke   | Inverse variance weighted | 11 | 1.0020 | 0.9427 | 1.0649 | 0.9492 | -0.0437 | 0.0630 | 0.5052 | 14.7084 | 0.0993 | -10.9772  |
| g_Parasutterella        | LargeArteryStroke   | Simple mode               | 11 | 1.0601 | 0.9555 | 1.1761 | 0.2966 | -0.0437 | 0.0630 | 0.5052 | 14.7084 | 0.0993 | -10.9772  |
| g_Parasutterella        | LargeArteryStroke   | Weighted mode             | 11 | 1.0259 | 0.9397 | 1.1200 | 0.5806 | -0.0437 | 0.0630 | 0.5052 | 14.7084 | 0.0993 | -10.9772  |
| g_Parasutterella        | SmallVesselStroke   | MR Egger                  | 11 | 1.0165 | 0.9358 | 1.1043 | 0.7069 | 0.0046  | 0.0271 | 0.8700 | 8.6729  | 0.4680 | -45.2242  |
| g_Parasutterella        | SmallVesselStroke   | Weighted median           | 11 | 1.0243 | 0.9878 | 1.0621 | 0.1946 | 0.0046  | 0.0271 | 0.8700 | 8.6729  | 0.4680 | -45.2242  |
| g_Parasutterella        | SmallVesselStroke   | Inverse variance weighted | 11 | 1.0234 | 0.9962 | 1.0513 | 0.0927 | 0.0046  | 0.0271 | 0.8700 | 8.6729  | 0.4680 | -45.2242  |
| g_Parasutterella        | SmallVesselStroke   | Simple mode               | 11 | 1.0082 | 0.9504 | 1.0695 | 0.7915 | 0.0046  | 0.0271 | 0.8700 | 8.6729  | 0.4680 | -45.2242  |
| g_Parasutterella        | SmallVesselStroke   | Weighted mode             | 11 | 1.0174 | 0.9636 | 1.0743 | 0.5474 | 0.0046  | 0.0271 | 0.8700 | 8.6729  | 0.4680 | -45.2242  |
| g_Parasutterella        | Stroke              | MR Egger                  | 16 | 1.0011 | 0.9752 | 1.0276 | 0.9367 | 0.0007  | 0.0096 | 0.9432 | 5.3187  | 0.9809 | -59.3511  |
| g_Parasutterella        | Stroke              | Weighted median           | 16 | 1.0031 | 0.9889 | 1.0176 | 0.6669 | 0.0007  | 0.0096 | 0.9432 | 5.3187  | 0.9809 | -59.3511  |
| g_Parasutterella        | Stroke              | Inverse variance weighted | 16 | 1.0020 | 0.9910 | 1.0130 | 0.7269 | 0.0007  | 0.0096 | 0.9432 | 5.3187  | 0.9809 | -59.3511  |
| g_Parasutterella        | Stroke              | Simple mode               | 16 | 1.0074 | 0.9836 | 1.0319 | 0.5545 | 0.0007  | 0.0096 | 0.9432 | 5.3187  | 0.9809 | -59.3511  |
| g_Parasutterella        | Stroke              | Weighted mode             | 16 | 1.0048 | 0.9835 | 1.0265 | 0.6690 | 0.0007  | 0.0096 | 0.9432 | 5.3187  | 0.9809 | -59.3511  |
| g_Peptoniphilus         | CardioEmbolicStroke | MR Egger                  | 9  | 0.4346 | 0.1710 | 1.1049 | 0.1235 | 0.2760  | 0.1398 | 0.0889 | 8.5688  | 0.3800 | 1255.1822 |
| g_Peptoniphilus         | CardioEmbolicStroke | Weighted median           | 9  | 1.1584 | 0.9743 | 1.3772 | 0.0960 | 0.2760  | 0.1398 | 0.0889 | 8.5688  | 0.3800 | 1255.1822 |
| g_Peptoniphilus         | CardioEmbolicStroke | Inverse variance weighted | 9  | 1.1024 | 0.9638 | 1.2610 | 0.1550 | 0.2760  | 0.1398 | 0.0889 | 8.5688  | 0.3800 | 1255.1822 |
| g_Peptoniphilus         | CardioEmbolicStroke | Simple mode               | 9  | 1.2274 | 0.9514 | 1.5834 | 0.1536 | 0.2760  | 0.1398 | 0.0889 | 8.5688  | 0.3800 | 1255.1822 |
| g_Peptoniphilus         | CardioEmbolicStroke | Weighted mode             | 9  | 1.2242 | 0.9701 | 1.5448 | 0.1268 | 0.2760  | 0.1398 | 0.0889 | 8.5688  | 0.3800 | 1255.1822 |
| g_Peptoniphilus         | IschemicStroke      | MR Egger                  | 26 | 1.0091 | 0.9867 | 1.0321 | 0.4356 | 0.0004  | 0.0069 | 0.9509 | 28.5668 | 0.2369 | -14.3073  |
| g_Peptoniphilus         | IschemicStroke      | Weighted median           | 26 | 1.0059 | 0.9854 | 1.0268 | 0.5754 | 0.0004  | 0.0069 | 0.9509 | 28.5668 | 0.2369 | -14.3073  |
| g_Peptoniphilus         | IschemicStroke      | Inverse variance weighted | 26 | 1.0097 | 0.9954 | 1.0241 | 0.1835 | 0.0004  | 0.0069 | 0.9509 | 28.5668 | 0.2369 | -14.3073  |
| g_Peptoniphilus         | IschemicStroke      | Simple mode               | 26 | 0.9876 | 0.9432 | 1.0341 | 0.6009 | 0.0004  | 0.0069 | 0.9509 | 28.5668 | 0.2369 | -14.3073  |
| g_Peptoniphilus         | IschemicStroke      | Weighted mode             | 26 | 0.9815 | 0.9293 | 1.0366 | 0.5094 | 0.0004  | 0.0069 | 0.9509 | 28.5668 | 0.2369 | -14.3073  |
| g_Peptoniphilus         | LargeArteryStroke   | MR Egger                  | 17 | 1.0532 | 0.9493 | 1.1684 | 0.3435 | -0.0028 | 0.0253 | 0.9127 | 17.7260 | 0.2773 | -10.0482  |
| g_Peptoniphilus         | LargeArteryStroke   | Weighted median           | 17 | 1.0062 | 0.9281 | 1.0909 | 0.8806 | -0.0028 | 0.0253 | 0.9127 | 17.7260 | 0.2773 | -10.0482  |
| g_Peptoniphilus         | LargeArteryStroke   | Inverse variance weighted | 17 | 1.0481 | 0.9882 | 1.1117 | 0.1178 | -0.0028 | 0.0253 | 0.9127 | 17.7260 | 0.2773 | -10.0482  |
| g_Peptoniphilus         | LargeArteryStroke   | Simple mode               | 17 | 0.9926 | 0.8571 | 1.1495 | 0.9222 | -0.0028 | 0.0253 | 0.9127 | 17.7260 | 0.2773 | -10.0482  |
| g_Peptoniphilus         | LargeArteryStroke   | Weighted mode             | 17 | 1.0058 | 0.8963 | 1.1286 | 0.9231 | -0.0028 | 0.0253 | 0.9127 | 17.7260 | 0.2773 | -10.0482  |
| g_Peptoniphilus         | SmallVesselStroke   | MR Egger                  | 18 | 0.9998 | 0.9519 | 1.0501 | 0.9929 | -0.0043 | 0.0125 | 0.7381 | 12.9374 | 0.6773 | -31.3062  |
| g_Peptoniphilus         | SmallVesselStroke   | Weighted median           | 18 | 1.0097 | 0.9679 | 1.0533 | 0.6541 | -0.0043 | 0.0125 | 0.7381 | 12.9374 | 0.6773 | -31.3062  |
| g_Peptoniphilus         | SmallVesselStroke   | Inverse variance weighted | 18 | 0.9930 | 0.9640 | 1.0229 | 0.6432 | -0.0043 | 0.0125 | 0.7381 | 12.9374 | 0.6773 | -31.3062  |
| g_Peptoniphilus         | SmallVesselStroke   | Simple mode               | 18 | 0.9962 | 0.9327 | 1.0640 | 0.9111 | -0.0043 | 0.0125 | 0.7381 | 12.9374 | 0.6773 | -31.3062  |
| g_Peptoniphilus         | SmallVesselStroke   | Weighted mode             | 18 | 1.0113 | 0.9600 | 1.0654 | 0.6781 | -0.0043 | 0.0125 | 0.7381 | 12.9374 | 0.6773 | -31.3062  |
| g_Peptoniphilus         | Stroke              | MR Egger                  | 24 | 0.9822 | 0.9584 | 1.0065 | 0.1640 | 0.0063  | 0.0061 | 0.3108 | 12.0902 | 0.9691 | -35.8830  |
| g_Peptoniphilus         | Stroke              | Weighted median           | 24 | 0.9906 | 0.9718 | 1.0098 | 0.3354 | 0.0063  | 0.0061 | 0.3108 | 12.0902 | 0.9691 | -35.8830  |
| g_Peptoniphilus         | Stroke              | Inverse variance weighted | 24 | 0.9926 | 0.9785 | 1.0069 | 0.3061 | 0.0063  | 0.0061 | 0.3108 | 12.0902 | 0.9691 | -35.8830  |
| g_Peptoniphilus         | Stroke              | Simple mode               | 24 | 1.0111 | 0.9772 | 1.0462 | 0.5311 | 0.0063  | 0.0061 | 0.3108 | 12.0902 | 0.9691 | -35.8830  |
| g_Peptoniphilus         | Stroke              | Weighted mode             | 24 | 0.9743 | 0.9433 | 1.0062 | 0.1267 | 0.0063  | 0.0061 | 0.3108 | 12.0902 | 0.9691 | -35.8830  |
| g_Phascolartcobacterium | CardioEmbolicStroke | MR Egger                  | 5  | 1.0010 | 0.8782 | 1.1411 | 0.9886 | 0.0364  | 0.0416 | 0.4462 | 1.8798  | 0.5977 | -89.5246  |
| g_Phascolartcobacterium | CardioEmbolicStroke | Weighted median           | 5  | 1.0308 | 0.9161 | 1.1598 | 0.6148 | 0.0364  | 0.0416 | 0.4462 | 1.8798  | 0.5977 | -89.5246  |
| g_Phascolartcobacterium | CardioEmbolicStroke | Inverse variance weighted | 5  | 1.0423 | 0.9483 | 1.1457 | 0.3901 | 0.0364  | 0.0416 | 0.4462 | 1.8798  | 0.5977 | -89.5246  |
| g_Phascolartcobacterium | CardioEmbolicStroke | Simple mode               | 5  | 0.9878 | 0.8081 | 1.2075 | 0.9103 | 0.0364  | 0.0416 | 0.4462 | 1.8798  | 0.5977 | -89.5246  |
| g_Phascolartcobacterium | CardioEmbolicStroke | Weighted mode             | 5  | 1.0237 | 0.9145 | 1.1459 | 0.7049 | 0.0364  | 0.0416 | 0.4462 | 1.8798  | 0.5977 | -89.5246  |

|                         |                     |                           |    |        |        |        |        |         |        |        |         |        |           |
|-------------------------|---------------------|---------------------------|----|--------|--------|--------|--------|---------|--------|--------|---------|--------|-----------|
| g_Phascolarctobacterium | IschemicStroke      | MR Egger                  | 15 | 1.0071 | 0.9822 | 1.0327 | 0.5903 | -0.0028 | 0.0098 | 0.7787 | 15.2000 | 0.2950 | -18.1799  |
| g_Phascolarctobacterium | IschemicStroke      | Weighted median           | 15 | 1.0071 | 0.9846 | 1.0301 | 0.5388 | -0.0028 | 0.0098 | 0.7787 | 15.2000 | 0.2950 | -18.1799  |
| g_Phascolarctobacterium | IschemicStroke      | Inverse variance weighted | 15 | 1.0043 | 0.9883 | 1.0205 | 0.5984 | -0.0028 | 0.0098 | 0.7787 | 15.2000 | 0.2950 | -18.1799  |
| g_Phascolarctobacterium | IschemicStroke      | Simple mode               | 15 | 1.0077 | 0.9803 | 1.0360 | 0.5928 | -0.0028 | 0.0098 | 0.7787 | 15.2000 | 0.2950 | -18.1799  |
| g_Phascolarctobacterium | IschemicStroke      | Weighted mode             | 15 | 1.0064 | 0.9862 | 1.0271 | 0.5467 | -0.0028 | 0.0098 | 0.7787 | 15.2000 | 0.2950 | -18.1799  |
| g_Phascolarctobacterium | LargeArteryStroke   | MR Egger                  | 9  | 1.0325 | 0.9367 | 1.1381 | 0.5405 | -0.0131 | 0.0365 | 0.7312 | 10.7721 | 0.1489 | -10.9047  |
| g_Phascolarctobacterium | LargeArteryStroke   | Weighted median           | 9  | 1.0185 | 0.9447 | 1.0982 | 0.6323 | -0.0131 | 0.0365 | 0.7312 | 10.7721 | 0.1489 | -10.9047  |
| g_Phascolarctobacterium | LargeArteryStroke   | Inverse variance weighted | 9  | 1.0193 | 0.9565 | 1.0863 | 0.5555 | -0.0131 | 0.0365 | 0.7312 | 10.7721 | 0.1489 | -10.9047  |
| g_Phascolarctobacterium | LargeArteryStroke   | Simple mode               | 9  | 1.0395 | 0.9282 | 1.1641 | 0.5213 | -0.0131 | 0.0365 | 0.7312 | 10.7721 | 0.1489 | -10.9047  |
| g_Phascolarctobacterium | LargeArteryStroke   | Weighted mode             | 9  | 1.0127 | 0.9419 | 1.0888 | 0.7420 | -0.0131 | 0.0365 | 0.7312 | 10.7721 | 0.1489 | -10.9047  |
| g_Phascolarctobacterium | SmallVesselStroke   | MR Egger                  | 9  | 1.0224 | 0.9777 | 1.0691 | 0.3638 | 0.0004  | 0.0165 | 0.9825 | 4.0929  | 0.7690 | -48.1741  |
| g_Phascolarctobacterium | SmallVesselStroke   | Weighted median           | 9  | 1.0205 | 0.9781 | 1.0647 | 0.3490 | 0.0004  | 0.0165 | 0.9825 | 4.0929  | 0.7690 | -48.1741  |
| g_Phascolarctobacterium | SmallVesselStroke   | Inverse variance weighted | 9  | 1.0228 | 0.9918 | 1.0547 | 0.1508 | 0.0004  | 0.0165 | 0.9825 | 4.0929  | 0.7690 | -48.1741  |
| g_Phascolarctobacterium | SmallVesselStroke   | Simple mode               | 9  | 1.0452 | 0.9821 | 1.1124 | 0.2013 | 0.0004  | 0.0165 | 0.9825 | 4.0929  | 0.7690 | -48.1741  |
| g_Phascolarctobacterium | SmallVesselStroke   | Weighted mode             | 9  | 1.0182 | 0.9768 | 1.0613 | 0.4201 | 0.0004  | 0.0165 | 0.9825 | 4.0929  | 0.7690 | -48.1741  |
| g_Phascolarctobacterium | Stroke              | MR Egger                  | 14 | 1.0212 | 0.9841 | 1.0596 | 0.2885 | -0.0101 | 0.0100 | 0.3298 | 12.9075 | 0.4550 | -40.6738  |
| g_Phascolarctobacterium | Stroke              | Weighted median           | 14 | 0.9958 | 0.9705 | 1.0217 | 0.7474 | -0.0101 | 0.0100 | 0.3298 | 12.9075 | 0.4550 | -40.6738  |
| g_Phascolarctobacterium | Stroke              | Inverse variance weighted | 14 | 1.0045 | 0.9856 | 1.0238 | 0.6415 | -0.0101 | 0.0100 | 0.3298 | 12.9075 | 0.4550 | -40.6738  |
| g_Phascolarctobacterium | Stroke              | Simple mode               | 14 | 0.9978 | 0.9616 | 1.0353 | 0.9086 | -0.0101 | 0.0100 | 0.3298 | 12.9075 | 0.4550 | -40.6738  |
| g_Phascolarctobacterium | Stroke              | Weighted mode             | 14 | 0.9978 | 0.9662 | 1.0305 | 0.8953 | -0.0101 | 0.0100 | 0.3298 | 12.9075 | 0.4550 | -40.6738  |
| g_Porphyromonas         | CardioEmbolicStroke | MR Egger                  | 8  | 0.8413 | 0.3418 | 2.0710 | 0.7198 | 0.0308  | 0.2260 | 0.8961 | 6.5132  | 0.3682 | -82.2776  |
| g_Porphyromonas         | CardioEmbolicStroke | Weighted median           | 8  | 0.9121 | 0.7839 | 1.0613 | 0.2338 | 0.0308  | 0.2260 | 0.8961 | 6.5132  | 0.3682 | -82.2776  |
| g_Porphyromonas         | CardioEmbolicStroke | Inverse variance weighted | 8  | 0.8952 | 0.8013 | 1.0001 | 0.0501 | 0.0308  | 0.2260 | 0.8961 | 6.5132  | 0.3682 | -82.2776  |
| g_Porphyromonas         | CardioEmbolicStroke | Simple mode               | 8  | 0.9177 | 0.8119 | 1.2756 | 0.8836 | 0.0308  | 0.2260 | 0.8961 | 6.5132  | 0.3682 | -82.2776  |
| g_Porphyromonas         | CardioEmbolicStroke | Weighted mode             | 8  | 0.9900 | 0.7813 | 1.2543 | 0.9359 | 0.0308  | 0.2260 | 0.8961 | 6.5132  | 0.3682 | -82.2776  |
| g_Porphyromonas         | IschemicStroke      | MR Egger                  | 11 | 1.0430 | 0.9795 | 1.1105 | 0.2215 | -0.0257 | 0.0193 | 0.2150 | 19.3790 | 0.0357 | -38.1923  |
| g_Porphyromonas         | IschemicStroke      | Weighted median           | 11 | 0.9876 | 0.9584 | 1.0176 | 0.4128 | -0.0257 | 0.0193 | 0.2150 | 19.3790 | 0.0357 | -38.1923  |
| g_Porphyromonas         | IschemicStroke      | Inverse variance weighted | 11 | 1.0036 | 0.9756 | 1.0324 | 0.8043 | -0.0257 | 0.0193 | 0.2150 | 19.3790 | 0.0357 | -38.1923  |
| g_Porphyromonas         | IschemicStroke      | Simple mode               | 11 | 0.9858 | 0.9360 | 1.0381 | 0.5986 | -0.0257 | 0.0193 | 0.2150 | 19.3790 | 0.0357 | -38.1923  |
| g_Porphyromonas         | IschemicStroke      | Weighted mode             | 11 | 0.9892 | 0.9416 | 1.0393 | 0.6764 | -0.0257 | 0.0193 | 0.2150 | 19.3790 | 0.0357 | -38.1923  |
| g_Porphyromonas         | LargeArteryStroke   | MR Egger                  | 8  | 0.8827 | 0.4380 | 1.7789 | 0.7391 | 0.0681  | 0.1762 | 0.7126 | 7.1075  | 0.3110 | -169.3409 |
| g_Porphyromonas         | LargeArteryStroke   | Weighted median           | 8  | 1.0040 | 0.8925 | 1.1295 | 0.9464 | 0.0681  | 0.1762 | 0.7126 | 7.1075  | 0.3110 | -169.3409 |
| g_Porphyromonas         | LargeArteryStroke   | Inverse variance weighted | 8  | 1.0123 | 0.9305 | 1.1013 | 0.7763 | 0.0681  | 0.1762 | 0.7126 | 7.1075  | 0.3110 | -169.3409 |
| g_Porphyromonas         | LargeArteryStroke   | Simple mode               | 8  | 1.1001 | 0.9078 | 1.3331 | 0.3629 | 0.0681  | 0.1762 | 0.7126 | 7.1075  | 0.3110 | -169.3409 |
| g_Porphyromonas         | LargeArteryStroke   | Weighted mode             | 8  | 0.9604 | 0.8047 | 1.1463 | 0.6683 | 0.0681  | 0.1762 | 0.7126 | 7.1075  | 0.3110 | -169.3409 |
| g_Porphyromonas         | SmallVesselStroke   | MR Egger                  | 8  | 1.2307 | 0.8317 | 1.8211 | 0.3392 | -0.0948 | 0.0986 | 0.3735 | 7.3363  | 0.2909 | -343.1106 |
| g_Porphyromonas         | SmallVesselStroke   | Weighted median           | 8  | 1.0179 | 0.9570 | 1.0827 | 0.5734 | -0.0948 | 0.0986 | 0.3735 | 7.3363  | 0.2909 | -343.1106 |
| g_Porphyromonas         | SmallVesselStroke   | Inverse variance weighted | 8  | 1.0171 | 0.9674 | 1.0694 | 0.5075 | -0.0948 | 0.0986 | 0.3735 | 7.3363  | 0.2909 | -343.1106 |
| g_Porphyromonas         | SmallVesselStroke   | Simple mode               | 8  | 1.0450 | 0.9480 | 1.1519 | 0.4054 | -0.0948 | 0.0986 | 0.3735 | 7.3363  | 0.2909 | -343.1106 |
| g_Porphyromonas         | SmallVesselStroke   | Weighted mode             | 8  | 1.0349 | 0.9527 | 1.1242 | 0.4436 | -0.0948 | 0.0986 | 0.3735 | 7.3363  | 0.2909 | -343.1106 |
| g_Porphyromonas         | Stroke              | MR Egger                  | 10 | 1.0100 | 0.9301 | 1.0969 | 0.8185 | -0.0091 | 0.0214 | 0.6817 | 11.1105 | 0.1955 | -223.6834 |
| g_Porphyromonas         | Stroke              | Weighted median           | 10 | 0.9761 | 0.9504 | 1.0025 | 0.0754 | -0.0091 | 0.0214 | 0.6817 | 11.1105 | 0.1955 | -223.6834 |
| g_Porphyromonas         | Stroke              | Inverse variance weighted | 10 | 0.9928 | 0.9709 | 1.0153 | 0.5293 | -0.0091 | 0.0214 | 0.6817 | 11.1105 | 0.1955 | -223.6834 |
| g_Porphyromonas         | Stroke              | Simple mode               | 10 | 0.9732 | 0.9364 | 1.0114 | 0.2001 | -0.0091 | 0.0214 | 0.6817 | 11.1105 | 0.1955 | -223.6834 |
| g_Porphyromonas         | Stroke              | Weighted mode             | 10 | 0.9724 | 0.9370 | 1.0090 | 0.1722 | -0.0091 | 0.0214 | 0.6817 | 11.1105 | 0.1955 | -223.6834 |
| g_Providencia           | CardioEmbolicStroke | MR Egger                  | 9  | 1.3771 | 0.8516 | 2.2266 | 0.2332 | -0.1128 | 0.1004 | 0.2984 | 4.6510  | 0.7941 | -185.8978 |
| g_Providencia           | CardioEmbolicStroke | Weighted median           | 9  | 1.0227 | 0.8964 | 1.1668 | 0.7387 | -0.1128 | 0.1004 | 0.2984 | 4.6510  | 0.7941 | -185.8978 |
| g_Providencia           | CardioEmbolicStroke | Inverse variance weighted | 9  | 1.0524 | 0.9490 | 1.1669 | 0.3332 | -0.1128 | 0.1004 | 0.2984 | 4.6510  | 0.7941 | -185.8978 |
| g_Providencia           | CardioEmbolicStroke | Simple mode               | 9  | 0.9690 | 0.7948 | 1.1813 | 0.7633 | -0.1128 | 0.1004 | 0.2984 | 4.6510  | 0.7941 | -185.8978 |
| g_Providencia           | CardioEmbolicStroke | Weighted mode             | 9  | 0.9805 | 0.8048 | 1.1945 | 0.8497 | -0.1128 | 0.1004 | 0.2984 | 4.6510  | 0.7941 | -185.8978 |
| g_Providencia           | IschemicStroke      | MR Egger                  | 12 | 1.0019 | 0.9161 | 1.0957 | 0.9679 | -0.0003 | 0.0199 | 0.9884 | 12.8373 | 0.2329 | -162.1369 |
| g_Providencia           | IschemicStroke      | Weighted median           | 12 | 1.0014 | 0.9719 | 1.0318 | 0.9259 | -0.0003 | 0.0199 | 0.9884 | 12.8373 | 0.2329 | -162.1369 |
| g_Providencia           | IschemicStroke      | Inverse variance weighted | 12 | 1.0012 | 0.9780 | 1.0250 | 0.9186 | -0.0003 | 0.0199 | 0.9884 | 12.8373 | 0.2329 | -162.1369 |

|                        |                     |                           |    |        |        |        |        |         |        |        |         |        |            |
|------------------------|---------------------|---------------------------|----|--------|--------|--------|--------|---------|--------|--------|---------|--------|------------|
| g_Providencia          | IschemicStroke      | Simple mode               | 12 | 1.0034 | 0.9568 | 1.0522 | 0.8916 | -0.0003 | 0.0199 | 0.9884 | 12.8373 | 0.2329 | -162.1369  |
| g_Providencia          | IschemicStroke      | Weighted mode             | 12 | 1.0089 | 0.9677 | 1.0518 | 0.6858 | -0.0003 | 0.0199 | 0.9884 | 12.8373 | 0.2329 | -162.1369  |
| g_Providencia          | LargeArteryStroke   | MR Egger                  | 12 | 1.0926 | 0.8453 | 1.4122 | 0.5141 | -0.0453 | 0.0571 | 0.4459 | 6.7151  | 0.7520 | -68.5849   |
| g_Providencia          | LargeArteryStroke   | Weighted median           | 12 | 1.0300 | 0.9387 | 1.1303 | 0.5323 | -0.0453 | 0.0571 | 0.4459 | 6.7151  | 0.7520 | -68.5849   |
| g_Providencia          | LargeArteryStroke   | Inverse variance weighted | 12 | 0.9888 | 0.9212 | 1.0614 | 0.7548 | -0.0453 | 0.0571 | 0.4459 | 6.7151  | 0.7520 | -68.5849   |
| g_Providencia          | LargeArteryStroke   | Simple mode               | 12 | 1.0355 | 0.8782 | 1.2209 | 0.6865 | -0.0453 | 0.0571 | 0.4459 | 6.7151  | 0.7520 | -68.5849   |
| g_Providencia          | LargeArteryStroke   | Weighted mode             | 12 | 1.0390 | 0.8943 | 1.2072 | 0.6270 | -0.0453 | 0.0571 | 0.4459 | 6.7151  | 0.7520 | -68.5849   |
| g_Providencia          | SmallVesselStroke   | MR Egger                  | 12 | 1.0550 | 0.9146 | 1.2170 | 0.4791 | -0.0235 | 0.0318 | 0.4759 | 9.4341  | 0.4915 | -92.4860   |
| g_Providencia          | SmallVesselStroke   | Weighted median           | 12 | 1.0058 | 0.9574 | 1.0566 | 0.8188 | -0.0235 | 0.0318 | 0.4759 | 9.4341  | 0.4915 | -92.4860   |
| g_Providencia          | SmallVesselStroke   | Inverse variance weighted | 12 | 1.0017 | 0.9632 | 1.0417 | 0.9336 | -0.0235 | 0.0318 | 0.4759 | 9.4341  | 0.4915 | -92.4860   |
| g_Providencia          | SmallVesselStroke   | Simple mode               | 12 | 1.0179 | 0.9401 | 1.1021 | 0.6709 | -0.0235 | 0.0318 | 0.4759 | 9.4341  | 0.4915 | -92.4860   |
| g_Providencia          | SmallVesselStroke   | Weighted mode             | 12 | 1.0138 | 0.9441 | 1.0886 | 0.7141 | -0.0235 | 0.0318 | 0.4759 | 9.4341  | 0.4915 | -92.4860   |
| g_Providencia          | Stroke              | MR Egger                  | 14 | 0.9872 | 0.9278 | 1.0505 | 0.6918 | 0.0040  | 0.0140 | 0.7791 | 13.4345 | 0.3383 | -130.3867  |
| g_Providencia          | Stroke              | Weighted median           | 14 | 1.0043 | 0.9795 | 1.0297 | 0.7366 | 0.0040  | 0.0140 | 0.7791 | 13.4345 | 0.3383 | -130.3867  |
| g_Providencia          | Stroke              | Inverse variance weighted | 14 | 0.9958 | 0.9780 | 1.0140 | 0.6487 | 0.0040  | 0.0140 | 0.7791 | 13.4345 | 0.3383 | -130.3867  |
| g_Providencia          | Stroke              | Simple mode               | 14 | 1.0112 | 0.9691 | 1.0551 | 0.6168 | 0.0040  | 0.0140 | 0.7791 | 13.4345 | 0.3383 | -130.3867  |
| g_Providencia          | Stroke              | Weighted mode             | 14 | 1.0121 | 0.9772 | 1.0482 | 0.5145 | 0.0040  | 0.0140 | 0.7791 | 13.4345 | 0.3383 | -130.3867  |
| g_Pseudoflavonifractor | CardioEmbolicStroke | MR Egger                  | 6  | 0.2757 | 0.0631 | 1.2038 | 0.1618 | 0.1813  | 0.1133 | 0.1846 | 4.8185  | 0.4384 | 11.0232    |
| g_Pseudoflavonifractor | CardioEmbolicStroke | Weighted median           | 6  | 0.9460 | 0.6313 | 1.4175 | 0.7878 | 0.1813  | 0.1133 | 0.1846 | 4.8185  | 0.4384 | 11.0232    |
| g_Pseudoflavonifractor | CardioEmbolicStroke | Inverse variance weighted | 6  | 0.8943 | 0.6547 | 1.2215 | 0.4825 | 0.1813  | 0.1133 | 0.1846 | 4.8185  | 0.4384 | 11.0232    |
| g_Pseudoflavonifractor | CardioEmbolicStroke | Simple mode               | 6  | 1.1566 | 0.5795 | 2.3086 | 0.6969 | 0.1813  | 0.1133 | 0.1846 | 4.8185  | 0.4384 | 11.0232    |
| g_Pseudoflavonifractor | CardioEmbolicStroke | Weighted mode             | 6  | 1.1405 | 0.5907 | 2.2021 | 0.7114 | 0.1813  | 0.1133 | 0.1846 | 4.8185  | 0.4384 | 11.0232    |
| g_Pseudoflavonifractor | IschemicStroke      | MR Egger                  | 10 | 1.0821 | 0.8921 | 1.3125 | 0.4463 | -0.0193 | 0.0174 | 0.2986 | 14.2994 | 0.1121 | 2904.9020  |
| g_Pseudoflavonifractor | IschemicStroke      | Weighted median           | 10 | 1.0292 | 0.9478 | 1.1176 | 0.4932 | -0.0193 | 0.0174 | 0.2986 | 14.2994 | 0.1121 | 2904.9020  |
| g_Pseudoflavonifractor | IschemicStroke      | Inverse variance weighted | 10 | 0.9780 | 0.9073 | 1.0543 | 0.5620 | -0.0193 | 0.0174 | 0.2986 | 14.2994 | 0.1121 | 2904.9020  |
| g_Pseudoflavonifractor | IschemicStroke      | Simple mode               | 10 | 1.0528 | 0.9274 | 1.1953 | 0.4469 | -0.0193 | 0.0174 | 0.2986 | 14.2994 | 0.1121 | 2904.9020  |
| g_Pseudoflavonifractor | IschemicStroke      | Weighted mode             | 10 | 1.0557 | 0.9208 | 1.2103 | 0.4570 | -0.0193 | 0.0174 | 0.2986 | 14.2994 | 0.1121 | 2904.9020  |
| g_Pseudoflavonifractor | LargeArteryStroke   | MR Egger                  | 7  | 0.5668 | 0.2468 | 1.3016 | 0.2383 | 0.0943  | 0.0666 | 0.2162 | 4.8238  | 0.5666 | 51.0138    |
| g_Pseudoflavonifractor | LargeArteryStroke   | Weighted median           | 7  | 1.1254 | 0.8261 | 1.5331 | 0.4540 | 0.0943  | 0.0666 | 0.2162 | 4.8238  | 0.5666 | 51.0138    |
| g_Pseudoflavonifractor | LargeArteryStroke   | Inverse variance weighted | 7  | 1.0108 | 0.8101 | 1.2612 | 0.9244 | 0.0943  | 0.0666 | 0.2162 | 4.8238  | 0.5666 | 51.0138    |
| g_Pseudoflavonifractor | LargeArteryStroke   | Simple mode               | 7  | 1.2078 | 0.7538 | 1.9352 | 0.4623 | 0.0943  | 0.0666 | 0.2162 | 4.8238  | 0.5666 | 51.0138    |
| g_Pseudoflavonifractor | LargeArteryStroke   | Weighted mode             | 7  | 1.2107 | 0.7320 | 2.0026 | 0.4846 | 0.0943  | 0.0666 | 0.2162 | 4.8238  | 0.5666 | 51.0138    |
| g_Pseudoflavonifractor | SmallVesselStroke   | MR Egger                  | 7  | 0.9930 | 0.4804 | 2.0524 | 0.9856 | -0.0106 | 0.0582 | 0.8631 | 12.3165 | 0.0307 | 60.9138    |
| g_Pseudoflavonifractor | SmallVesselStroke   | Weighted median           | 7  | 1.0627 | 0.8805 | 1.2826 | 0.5262 | -0.0106 | 0.0582 | 0.8631 | 12.3165 | 0.0307 | 60.9138    |
| g_Pseudoflavonifractor | SmallVesselStroke   | Inverse variance weighted | 7  | 0.9307 | 0.7801 | 1.1104 | 0.4252 | -0.0106 | 0.0582 | 0.8631 | 12.3165 | 0.0307 | 60.9138    |
| g_Pseudoflavonifractor | SmallVesselStroke   | Simple mode               | 7  | 1.0984 | 0.8333 | 1.4478 | 0.5301 | -0.0106 | 0.0582 | 0.8631 | 12.3165 | 0.0307 | 60.9138    |
| g_Pseudoflavonifractor | SmallVesselStroke   | Weighted mode             | 7  | 1.0984 | 0.8254 | 1.4618 | 0.5435 | -0.0106 | 0.0582 | 0.8631 | 12.3165 | 0.0307 | 60.9138    |
| g_Pseudoflavonifractor | Stroke              | MR Egger                  | 11 | 0.9826 | 0.8392 | 1.1506 | 0.8327 | -0.0025 | 0.0143 | 0.8653 | 13.2304 | 0.1525 | 19213.7083 |
| g_Pseudoflavonifractor | Stroke              | Weighted median           | 11 | 0.9896 | 0.9205 | 1.0640 | 0.7776 | -0.0025 | 0.0143 | 0.8653 | 13.2304 | 0.1525 | 19213.7083 |
| g_Pseudoflavonifractor | Stroke              | Inverse variance weighted | 11 | 0.9700 | 0.9148 | 1.0286 | 0.3086 | -0.0025 | 0.0143 | 0.8653 | 13.2304 | 0.1525 | 19213.7083 |
| g_Pseudoflavonifractor | Stroke              | Simple mode               | 11 | 1.0239 | 0.9146 | 1.1463 | 0.6902 | -0.0025 | 0.0143 | 0.8653 | 13.2304 | 0.1525 | 19213.7083 |
| g_Pseudoflavonifractor | Stroke              | Weighted mode             | 11 | 1.0184 | 0.9068 | 1.1437 | 0.7640 | -0.0025 | 0.0143 | 0.8653 | 13.2304 | 0.1525 | 19213.7083 |
| g_Roseburia            | CardioEmbolicStroke | MR Egger                  | 8  | 0.8750 | 0.4879 | 1.5689 | 0.6696 | 0.0197  | 0.0676 | 0.7805 | 5.4332  | 0.4896 | 180.8688   |
| g_Roseburia            | CardioEmbolicStroke | Weighted median           | 8  | 1.0234 | 0.7956 | 1.3165 | 0.8570 | 0.0197  | 0.0676 | 0.7805 | 5.4332  | 0.4896 | 180.8688   |
| g_Roseburia            | CardioEmbolicStroke | Inverse variance weighted | 8  | 0.9498 | 0.7847 | 1.1497 | 0.5970 | 0.0197  | 0.0676 | 0.7805 | 5.4332  | 0.4896 | 180.8688   |
| g_Roseburia            | CardioEmbolicStroke | Simple mode               | 8  | 1.0135 | 0.7144 | 1.4377 | 0.9422 | 0.0197  | 0.0676 | 0.7805 | 5.4332  | 0.4896 | 180.8688   |
| g_Roseburia            | CardioEmbolicStroke | Weighted mode             | 8  | 1.0210 | 0.7330 | 1.4223 | 0.9056 | 0.0197  | 0.0676 | 0.7805 | 5.4332  | 0.4896 | 180.8688   |
| g_Roseburia            | IschemicStroke      | MR Egger                  | 14 | 0.9782 | 0.9304 | 1.0284 | 0.4049 | 0.0008  | 0.0084 | 0.9210 | 11.4292 | 0.4925 | -87.6974   |
| g_Roseburia            | IschemicStroke      | Weighted median           | 14 | 0.9677 | 0.9285 | 1.0086 | 0.1196 | 0.0008  | 0.0084 | 0.9210 | 11.4292 | 0.4925 | -87.6974   |
| g_Roseburia            | IschemicStroke      | Inverse variance weighted | 14 | 0.9802 | 0.9521 | 1.0092 | 0.1796 | 0.0008  | 0.0084 | 0.9210 | 11.4292 | 0.4925 | -87.6974   |
| g_Roseburia            | IschemicStroke      | Simple mode               | 14 | 0.9607 | 0.9066 | 1.0181 | 0.1988 | 0.0008  | 0.0084 | 0.9210 | 11.4292 | 0.4925 | -87.6974   |
| g_Roseburia            | IschemicStroke      | Weighted mode             | 14 | 0.9657 | 0.9183 | 1.0155 | 0.1965 | 0.0008  | 0.0084 | 0.9210 | 11.4292 | 0.4925 | -87.6974   |
| g_Roseburia            | LargeArteryStroke   | MR Egger                  | 10 | 0.9867 | 0.7792 | 1.2495 | 0.9144 | -0.0252 | 0.0350 | 0.4909 | 11.9405 | 0.1539 | -52.2589   |

|                |                     |                           |    |        |        |        |        |         |        |        |         |        |           |
|----------------|---------------------|---------------------------|----|--------|--------|--------|--------|---------|--------|--------|---------|--------|-----------|
| g_Roseburia    | LargeArteryStroke   | Weighted median           | 10 | 0.9181 | 0.7931 | 1.0628 | 0.2526 | -0.0252 | 0.0350 | 0.4909 | 11.9405 | 0.1539 | -52.2589  |
| g_Roseburia    | LargeArteryStroke   | Inverse variance weighted | 10 | 0.9184 | 0.8066 | 1.0457 | 0.1987 | -0.0252 | 0.0350 | 0.4909 | 11.9405 | 0.1539 | -52.2589  |
| g_Roseburia    | LargeArteryStroke   | Simple mode               | 10 | 0.9384 | 0.7519 | 1.1712 | 0.5875 | -0.0252 | 0.0350 | 0.4909 | 11.9405 | 0.1539 | -52.2589  |
| g_Roseburia    | LargeArteryStroke   | Weighted mode             | 10 | 0.9315 | 0.7711 | 1.1252 | 0.4802 | -0.0252 | 0.0350 | 0.4909 | 11.9405 | 0.1539 | -52.2589  |
| g_Roseburia    | SmallVesselStroke   | MR Egger                  | 11 | 0.9307 | 0.8419 | 1.0288 | 0.1938 | 0.0107  | 0.0156 | 0.5106 | 7.3614  | 0.5995 | -70.9268  |
| g_Roseburia    | SmallVesselStroke   | Weighted median           | 11 | 0.9564 | 0.8841 | 1.0346 | 0.2660 | 0.0107  | 0.0156 | 0.5106 | 7.3614  | 0.5995 | -70.9268  |
| g_Roseburia    | SmallVesselStroke   | Inverse variance weighted | 11 | 0.9577 | 0.9036 | 1.0149 | 0.1442 | 0.0107  | 0.0156 | 0.5106 | 7.3614  | 0.5995 | -70.9268  |
| g_Roseburia    | SmallVesselStroke   | Simple mode               | 11 | 0.9462 | 0.8386 | 1.0676 | 0.3901 | 0.0107  | 0.0156 | 0.5106 | 7.3614  | 0.5995 | -70.9268  |
| g_Roseburia    | SmallVesselStroke   | Weighted mode             | 11 | 0.9450 | 0.8401 | 1.0631 | 0.3688 | 0.0107  | 0.0156 | 0.5106 | 7.3614  | 0.5995 | -70.9268  |
| g_Roseburia    | Stroke              | MR Egger                  | 13 | 1.0072 | 0.9461 | 1.0722 | 0.8268 | -0.0033 | 0.0088 | 0.7168 | 9.8090  | 0.5476 | -429.0981 |
| g_Roseburia    | Stroke              | Weighted median           | 13 | 0.9784 | 0.9396 | 1.0187 | 0.2891 | -0.0033 | 0.0088 | 0.7168 | 9.8090  | 0.5476 | -429.0981 |
| g_Roseburia    | Stroke              | Inverse variance weighted | 13 | 0.9967 | 0.9679 | 1.0263 | 0.8232 | -0.0033 | 0.0088 | 0.7168 | 9.8090  | 0.5476 | -429.0981 |
| g_Roseburia    | Stroke              | Simple mode               | 13 | 0.9807 | 0.9277 | 1.0369 | 0.5063 | -0.0033 | 0.0088 | 0.7168 | 9.8090  | 0.5476 | -429.0981 |
| g_Roseburia    | Stroke              | Weighted mode             | 13 | 0.9778 | 0.9286 | 1.0298 | 0.4126 | -0.0033 | 0.0088 | 0.7168 | 9.8090  | 0.5476 | -429.0981 |
| g_Ruminococcus | CardioEmbolicStroke | MR Egger                  | 5  | 0.7212 | 0.1242 | 4.1868 | 0.7398 | 0.0505  | 0.1606 | 0.7738 | 1.5647  | 0.6674 | 42.4123   |
| g_Ruminococcus | CardioEmbolicStroke | Weighted median           | 5  | 0.8754 | 0.5917 | 1.2949 | 0.5052 | 0.0505  | 0.1606 | 0.7738 | 1.5647  | 0.6674 | 42.4123   |
| g_Ruminococcus | CardioEmbolicStroke | Inverse variance weighted | 5  | 0.9523 | 0.7052 | 1.2859 | 0.7496 | 0.0505  | 0.1606 | 0.7738 | 1.5647  | 0.6674 | 42.4123   |
| g_Ruminococcus | CardioEmbolicStroke | Simple mode               | 5  | 0.8625 | 0.5270 | 1.4116 | 0.5879 | 0.0505  | 0.1606 | 0.7738 | 1.5647  | 0.6674 | 42.4123   |
| g_Ruminococcus | CardioEmbolicStroke | Weighted mode             | 5  | 0.8625 | 0.5362 | 1.3874 | 0.5750 | 0.0505  | 0.1606 | 0.7738 | 1.5647  | 0.6674 | 42.4123   |
| g_Ruminococcus | IschemicStroke      | MR Egger                  | 13 | 0.9871 | 0.8999 | 1.0828 | 0.7886 | 0.0086  | 0.0142 | 0.5572 | 24.2441 | 0.0117 | -45.5450  |
| g_Ruminococcus | IschemicStroke      | Weighted median           | 13 | 1.0042 | 0.9521 | 1.0592 | 0.8770 | 0.0086  | 0.0142 | 0.5572 | 24.2441 | 0.0117 | -45.5450  |
| g_Ruminococcus | IschemicStroke      | Inverse variance weighted | 13 | 1.0105 | 0.9594 | 1.0642 | 0.6938 | 0.0086  | 0.0142 | 0.5572 | 24.2441 | 0.0117 | -45.5450  |
| g_Ruminococcus | IschemicStroke      | Simple mode               | 13 | 0.9991 | 0.9236 | 1.0808 | 0.9827 | 0.0086  | 0.0142 | 0.5572 | 24.2441 | 0.0117 | -45.5450  |
| g_Ruminococcus | IschemicStroke      | Weighted mode             | 13 | 0.9959 | 0.9388 | 1.0566 | 0.8949 | 0.0086  | 0.0142 | 0.5572 | 24.2441 | 0.0117 | -45.5450  |
| g_Ruminococcus | LargeArteryStroke   | MR Egger                  | 8  | 1.1004 | 0.8651 | 1.3997 | 0.4652 | 0.0125  | 0.0334 | 0.7210 | 6.2460  | 0.3962 | -224.7145 |
| g_Ruminococcus | LargeArteryStroke   | Weighted median           | 8  | 1.1325 | 0.9346 | 1.3724 | 0.2041 | 0.0125  | 0.0334 | 0.7210 | 6.2460  | 0.3962 | -224.7145 |
| g_Ruminococcus | LargeArteryStroke   | Inverse variance weighted | 8  | 1.1425 | 0.9971 | 1.3091 | 0.0551 | 0.0125  | 0.0334 | 0.7210 | 6.2460  | 0.3962 | -224.7145 |
| g_Ruminococcus | LargeArteryStroke   | Simple mode               | 8  | 1.3449 | 1.0014 | 1.8062 | 0.0896 | 0.0125  | 0.0334 | 0.7210 | 6.2460  | 0.3962 | -224.7145 |
| g_Ruminococcus | LargeArteryStroke   | Weighted mode             | 8  | 1.1476 | 0.9118 | 1.4444 | 0.2790 | 0.0125  | 0.0334 | 0.7210 | 6.2460  | 0.3962 | -224.7145 |
| g_Ruminococcus | SmallVesselStroke   | MR Egger                  | 8  | 0.8990 | 0.7862 | 1.0279 | 0.1704 | 0.0234  | 0.0184 | 0.2514 | 7.5532  | 0.3736 | -311.7838 |
| g_Ruminococcus | SmallVesselStroke   | Weighted median           | 8  | 0.9739 | 0.8739 | 1.0854 | 0.6328 | 0.0234  | 0.0184 | 0.2514 | 7.5532  | 0.3736 | -311.7838 |
| g_Ruminococcus | SmallVesselStroke   | Inverse variance weighted | 8  | 0.9655 | 0.8920 | 1.0451 | 0.3850 | 0.0234  | 0.0184 | 0.2514 | 7.5532  | 0.3736 | -311.7838 |
| g_Ruminococcus | SmallVesselStroke   | Simple mode               | 8  | 0.9788 | 0.8390 | 1.1419 | 0.7930 | 0.0234  | 0.0184 | 0.2514 | 7.5532  | 0.3736 | -311.7838 |
| g_Ruminococcus | SmallVesselStroke   | Weighted mode             | 8  | 0.9773 | 0.8586 | 1.1123 | 0.7377 | 0.0234  | 0.0184 | 0.2514 | 7.5532  | 0.3736 | -311.7838 |
| g_Ruminococcus | Stroke              | MR Egger                  | 13 | 0.9900 | 0.9091 | 1.0779 | 0.8205 | 0.0082  | 0.0123 | 0.5198 | 22.1485 | 0.0232 | -77.4695  |
| g_Ruminococcus | Stroke              | Weighted median           | 13 | 1.0124 | 0.9643 | 1.0630 | 0.6190 | 0.0082  | 0.0123 | 0.5198 | 22.1485 | 0.0232 | -77.4695  |
| g_Ruminococcus | Stroke              | Inverse variance weighted | 13 | 1.0141 | 0.9687 | 1.0616 | 0.5482 | 0.0082  | 0.0123 | 0.5198 | 22.1485 | 0.0232 | -77.4695  |
| g_Ruminococcus | Stroke              | Simple mode               | 13 | 1.0237 | 0.9489 | 1.1044 | 0.5566 | 0.0082  | 0.0123 | 0.5198 | 22.1485 | 0.0232 | -77.4695  |
| g_Ruminococcus | Stroke              | Weighted mode             | 13 | 1.0141 | 0.9602 | 1.0711 | 0.6241 | 0.0082  | 0.0123 | 0.5198 | 22.1485 | 0.0232 | -77.4695  |
| g_Salmonella   | CardioEmbolicStroke | MR Egger                  | 6  | 2.2150 | 0.9056 | 5.4178 | 0.1563 | -0.2997 | 0.1981 | 0.2048 | 11.0907 | 0.0496 | -591.0156 |
| g_Salmonella   | CardioEmbolicStroke | Weighted median           | 6  | 0.9892 | 0.8261 | 1.1846 | 0.9061 | -0.2997 | 0.1981 | 0.2048 | 11.0907 | 0.0496 | -591.0156 |
| g_Salmonella   | CardioEmbolicStroke | Inverse variance weighted | 6  | 1.1240 | 0.9319 | 1.3557 | 0.2215 | -0.2997 | 0.1981 | 0.2048 | 11.0907 | 0.0496 | -591.0156 |
| g_Salmonella   | CardioEmbolicStroke | Simple mode               | 6  | 0.9509 | 0.7311 | 1.2368 | 0.7229 | -0.2997 | 0.1981 | 0.2048 | 11.0907 | 0.0496 | -591.0156 |
| g_Salmonella   | CardioEmbolicStroke | Weighted mode             | 6  | 0.9584 | 0.7364 | 1.2473 | 0.7648 | -0.2997 | 0.1981 | 0.2048 | 11.0907 | 0.0496 | -591.0156 |
| g_Salmonella   | IschemicStroke      | MR Egger                  | 11 | 1.0069 | 0.9408 | 1.0777 | 0.8469 | -0.0023 | 0.0189 | 0.9060 | 14.7701 | 0.0974 | -74.4597  |
| g_Salmonella   | IschemicStroke      | Weighted median           | 11 | 0.9910 | 0.9603 | 1.0226 | 0.5710 | -0.0023 | 0.0189 | 0.9060 | 14.7701 | 0.0974 | -74.4597  |
| g_Salmonella   | IschemicStroke      | Inverse variance weighted | 11 | 1.0030 | 0.9772 | 1.0296 | 0.8198 | -0.0023 | 0.0189 | 0.9060 | 14.7701 | 0.0974 | -74.4597  |
| g_Salmonella   | IschemicStroke      | Simple mode               | 11 | 0.9856 | 0.9375 | 1.0363 | 0.5834 | -0.0023 | 0.0189 | 0.9060 | 14.7701 | 0.0974 | -74.4597  |
| g_Salmonella   | IschemicStroke      | Weighted mode             | 11 | 0.9843 | 0.9454 | 1.0247 | 0.4580 | -0.0023 | 0.0189 | 0.9060 | 14.7701 | 0.0974 | -74.4597  |
| g_Salmonella   | LargeArteryStroke   | MR Egger                  | 10 | 0.9244 | 0.7699 | 1.1099 | 0.4240 | 0.0490  | 0.0502 | 0.3577 | 8.3457  | 0.4004 | -30.6389  |
| g_Salmonella   | LargeArteryStroke   | Weighted median           | 10 | 0.9962 | 0.9042 | 1.0976 | 0.9391 | 0.0490  | 0.0502 | 0.3577 | 8.3457  | 0.4004 | -30.6389  |
| g_Salmonella   | LargeArteryStroke   | Inverse variance weighted | 10 | 1.0050 | 0.9352 | 1.0801 | 0.8911 | 0.0490  | 0.0502 | 0.3577 | 8.3457  | 0.4004 | -30.6389  |
| g_Salmonella   | LargeArteryStroke   | Simple mode               | 10 | 1.1179 | 0.9485 | 1.3176 | 0.2164 | 0.0490  | 0.0502 | 0.3577 | 8.3457  | 0.4004 | -30.6389  |

|                  |                     |                           |    |        |        |        |        |         |        |        |         |        |              |
|------------------|---------------------|---------------------------|----|--------|--------|--------|--------|---------|--------|--------|---------|--------|--------------|
| g_Salmonella     | LargeArteryStroke   | Weighted mode             | 10 | 0.9695 | 0.8482 | 1.1081 | 0.6602 | 0.0490  | 0.0502 | 0.3577 | 8.3457  | 0.4004 | -30.6389     |
| g_Salmonella     | SmallVesselStroke   | MR Egger                  | 10 | 1.0004 | 0.9049 | 1.1060 | 0.9944 | -0.0067 | 0.0274 | 0.8132 | 7.9109  | 0.4422 | -74.7445     |
| g_Salmonella     | SmallVesselStroke   | Weighted median           | 10 | 0.9673 | 0.9174 | 1.0198 | 0.2174 | -0.0067 | 0.0274 | 0.8132 | 7.9109  | 0.4422 | -74.7445     |
| g_Salmonella     | SmallVesselStroke   | Inverse variance weighted | 10 | 0.9889 | 0.9507 | 1.0287 | 0.5801 | -0.0067 | 0.0274 | 0.8132 | 7.9109  | 0.4422 | -74.7445     |
| g_Salmonella     | SmallVesselStroke   | Simple mode               | 10 | 0.9636 | 0.8919 | 1.0410 | 0.3712 | -0.0067 | 0.0274 | 0.8132 | 7.9109  | 0.4422 | -74.7445     |
| g_Salmonella     | SmallVesselStroke   | Weighted mode             | 10 | 0.9595 | 0.8961 | 1.0273 | 0.2654 | -0.0067 | 0.0274 | 0.8132 | 7.9109  | 0.4422 | -74.7445     |
| g_Salmonella     | Stroke              | MR Egger                  | 13 | 1.0026 | 0.9516 | 1.0564 | 0.9228 | 0.0004  | 0.0137 | 0.9771 | 14.2346 | 0.2203 | -86.4003     |
| g_Salmonella     | Stroke              | Weighted median           | 13 | 0.9954 | 0.9697 | 1.0217 | 0.7276 | 0.0004  | 0.0137 | 0.9771 | 14.2346 | 0.2203 | -86.4003     |
| g_Salmonella     | Stroke              | Inverse variance weighted | 13 | 1.0034 | 0.9836 | 1.0235 | 0.7405 | 0.0004  | 0.0137 | 0.9771 | 14.2346 | 0.2203 | -86.4003     |
| g_Salmonella     | Stroke              | Simple mode               | 13 | 1.0010 | 0.9575 | 1.0465 | 0.9660 | 0.0004  | 0.0137 | 0.9771 | 14.2346 | 0.2203 | -86.4003     |
| g_Salmonella     | Stroke              | Weighted mode             | 13 | 0.9974 | 0.9635 | 1.0324 | 0.8838 | 0.0004  | 0.0137 | 0.9771 | 14.2346 | 0.2203 | -86.4003     |
| g_Shuttleworthia | CardioEmbolicStroke | MR Egger                  | 10 | 1.0631 | 0.7456 | 1.5158 | 0.7439 | -0.0357 | 0.0626 | 0.5843 | 4.7114  | 0.7879 | -707.8252    |
| g_Shuttleworthia | CardioEmbolicStroke | Weighted median           | 10 | 0.9687 | 0.8384 | 1.1193 | 0.6667 | -0.0357 | 0.0626 | 0.5843 | 4.7114  | 0.7879 | -707.8252    |
| g_Shuttleworthia | CardioEmbolicStroke | Inverse variance weighted | 10 | 0.9636 | 0.8655 | 1.0728 | 0.4985 | -0.0357 | 0.0626 | 0.5843 | 4.7114  | 0.7879 | -707.8252    |
| g_Shuttleworthia | CardioEmbolicStroke | Simple mode               | 10 | 0.8760 | 0.7002 | 1.0958 | 0.2763 | -0.0357 | 0.0626 | 0.5843 | 4.7114  | 0.7879 | -707.8252    |
| g_Shuttleworthia | CardioEmbolicStroke | Weighted mode             | 10 | 0.9704 | 0.7956 | 1.1837 | 0.7740 | -0.0357 | 0.0626 | 0.5843 | 4.7114  | 0.7879 | -707.8252    |
| g_Shuttleworthia | IschemicStroke      | MR Egger                  | 15 | 1.0655 | 1.0085 | 1.1257 | 0.0414 | -0.0241 | 0.0106 | 0.0404 | 15.0094 | 0.3775 | -61.8011     |
| g_Shuttleworthia | IschemicStroke      | Weighted median           | 15 | 1.0108 | 0.9786 | 1.0441 | 0.5138 | -0.0241 | 0.0106 | 0.0404 | 15.0094 | 0.3775 | -61.8011     |
| g_Shuttleworthia | IschemicStroke      | Inverse variance weighted | 15 | 1.0049 | 0.9825 | 1.0278 | 0.6712 | -0.0241 | 0.0106 | 0.0404 | 15.0094 | 0.3775 | -61.8011     |
| g_Shuttleworthia | IschemicStroke      | Simple mode               | 15 | 0.9982 | 0.9436 | 1.0559 | 0.9498 | -0.0241 | 0.0106 | 0.0404 | 15.0094 | 0.3775 | -61.8011     |
| g_Shuttleworthia | IschemicStroke      | Weighted mode             | 15 | 1.0211 | 0.9764 | 1.0678 | 0.3765 | -0.0241 | 0.0106 | 0.0404 | 15.0094 | 0.3775 | -61.8011     |
| g_Shuttleworthia | LargeArteryStroke   | MR Egger                  | 11 | 1.2617 | 1.0061 | 1.5823 | 0.0750 | -0.0899 | 0.0412 | 0.0568 | 9.2629  | 0.5073 | -120.6484    |
| g_Shuttleworthia | LargeArteryStroke   | Weighted median           | 11 | 0.9337 | 0.8360 | 1.0428 | 0.2238 | -0.0899 | 0.0412 | 0.0568 | 9.2629  | 0.5073 | -120.6484    |
| g_Shuttleworthia | LargeArteryStroke   | Inverse variance weighted | 11 | 0.9953 | 0.9215 | 1.0750 | 0.9041 | -0.0899 | 0.0412 | 0.0568 | 9.2629  | 0.5073 | -120.6484    |
| g_Shuttleworthia | LargeArteryStroke   | Simple mode               | 11 | 0.8948 | 0.7256 | 1.1034 | 0.3231 | -0.0899 | 0.0412 | 0.0568 | 9.2629  | 0.5073 | -120.6484    |
| g_Shuttleworthia | LargeArteryStroke   | Weighted mode             | 11 | 0.8971 | 0.7354 | 1.0944 | 0.3096 | -0.0899 | 0.0412 | 0.0568 | 9.2629  | 0.5073 | -120.6484    |
| g_Shuttleworthia | SmallVesselStroke   | MR Egger                  | 11 | 1.0238 | 0.9024 | 1.1615 | 0.7231 | -0.0035 | 0.0230 | 0.8817 | 8.9953  | 0.4377 | -315.7706    |
| g_Shuttleworthia | SmallVesselStroke   | Weighted median           | 11 | 1.0017 | 0.9448 | 1.0620 | 0.9552 | -0.0035 | 0.0230 | 0.8817 | 8.9953  | 0.4377 | -315.7706    |
| g_Shuttleworthia | SmallVesselStroke   | Inverse variance weighted | 11 | 1.0144 | 0.9717 | 1.0589 | 0.5152 | -0.0035 | 0.0230 | 0.8817 | 8.9953  | 0.4377 | -315.7706    |
| g_Shuttleworthia | SmallVesselStroke   | Simple mode               | 11 | 0.9936 | 0.9172 | 1.0764 | 0.8787 | -0.0035 | 0.0230 | 0.8817 | 8.9953  | 0.4377 | -315.7706    |
| g_Shuttleworthia | SmallVesselStroke   | Weighted mode             | 11 | 1.0074 | 0.9383 | 1.0816 | 0.8423 | -0.0035 | 0.0230 | 0.8817 | 8.9953  | 0.4377 | -315.7706    |
| g_Shuttleworthia | Stroke              | MR Egger                  | 16 | 1.0824 | 1.0324 | 1.1348 | 0.0054 | -0.0284 | 0.0091 | 0.0075 | 22.5033 | 0.0953 | -35.3421     |
| g_Shuttleworthia | Stroke              | Weighted median           | 16 | 1.0114 | 0.9836 | 1.0401 | 0.4244 | -0.0284 | 0.0091 | 0.0075 | 22.5033 | 0.0953 | -35.3421     |
| g_Shuttleworthia | Stroke              | Inverse variance weighted | 16 | 1.0101 | 0.9872 | 1.0335 | 0.3919 | -0.0284 | 0.0091 | 0.0075 | 22.5033 | 0.0953 | -35.3421     |
| g_Shuttleworthia | Stroke              | Simple mode               | 16 | 1.0260 | 0.9765 | 1.0779 | 0.3250 | -0.0284 | 0.0091 | 0.0075 | 22.5033 | 0.0953 | -35.3421     |
| g_Shuttleworthia | Stroke              | Weighted mode             | 16 | 1.0282 | 0.9820 | 1.0765 | 0.2544 | -0.0284 | 0.0091 | 0.0075 | 22.5033 | 0.0953 | -35.3421     |
| g_Solobacterium  | CardioEmbolicStroke | MR Egger                  | 7  | 1.1201 | 0.6340 | 1.9790 | 0.7122 | -0.0459 | 0.0964 | 0.6541 | 4.9543  | 0.4215 | -171977.1810 |
| g_Solobacterium  | CardioEmbolicStroke | Weighted median           | 7  | 0.9540 | 0.7713 | 1.1800 | 0.6644 | -0.0459 | 0.0964 | 0.6541 | 4.9543  | 0.4215 | -171977.1810 |
| g_Solobacterium  | CardioEmbolicStroke | Inverse variance weighted | 7  | 0.9812 | 0.8333 | 1.1553 | 0.8196 | -0.0459 | 0.0964 | 0.6541 | 4.9543  | 0.4215 | -171977.1810 |
| g_Solobacterium  | CardioEmbolicStroke | Simple mode               | 7  | 0.9035 | 0.6773 | 1.2053 | 0.5160 | -0.0459 | 0.0964 | 0.6541 | 4.9543  | 0.4215 | -171977.1810 |
| g_Solobacterium  | CardioEmbolicStroke | Weighted mode             | 7  | 0.9173 | 0.6850 | 1.2285 | 0.5835 | -0.0459 | 0.0964 | 0.6541 | 4.9543  | 0.4215 | -171977.1810 |
| g_Solobacterium  | IschemicStroke      | MR Egger                  | 14 | 1.0136 | 0.9488 | 1.0829 | 0.6958 | -0.0176 | 0.0140 | 0.2321 | 13.0255 | 0.4458 | -90.4108     |
| g_Solobacterium  | IschemicStroke      | Weighted median           | 14 | 0.9819 | 0.9442 | 1.0211 | 0.3594 | -0.0176 | 0.0140 | 0.2321 | 13.0255 | 0.4458 | -90.4108     |
| g_Solobacterium  | IschemicStroke      | Inverse variance weighted | 14 | 0.9753 | 0.9486 | 1.0028 | 0.0776 | -0.0176 | 0.0140 | 0.2321 | 13.0255 | 0.4458 | -90.4108     |
| g_Solobacterium  | IschemicStroke      | Simple mode               | 14 | 0.9637 | 0.9079 | 1.0228 | 0.2450 | -0.0176 | 0.0140 | 0.2321 | 13.0255 | 0.4458 | -90.4108     |
| g_Solobacterium  | IschemicStroke      | Weighted mode             | 14 | 0.9744 | 0.9230 | 1.0287 | 0.3656 | -0.0176 | 0.0140 | 0.2321 | 13.0255 | 0.4458 | -90.4108     |
| g_Solobacterium  | LargeArteryStroke   | MR Egger                  | 12 | 0.9410 | 0.7443 | 1.1896 | 0.6220 | 0.0183  | 0.0479 | 0.7107 | 6.8823  | 0.7365 | -54.4672     |
| g_Solobacterium  | LargeArteryStroke   | Weighted median           | 12 | 0.9982 | 0.8799 | 1.1323 | 0.9772 | 0.0183  | 0.0479 | 0.7107 | 6.8823  | 0.7365 | -54.4672     |
| g_Solobacterium  | LargeArteryStroke   | Inverse variance weighted | 12 | 0.9811 | 0.8925 | 1.0785 | 0.6927 | 0.0183  | 0.0479 | 0.7107 | 6.8823  | 0.7365 | -54.4672     |
| g_Solobacterium  | LargeArteryStroke   | Simple mode               | 12 | 1.0679 | 0.8765 | 1.3011 | 0.5277 | 0.0183  | 0.0479 | 0.7107 | 6.8823  | 0.7365 | -54.4672     |
| g_Solobacterium  | LargeArteryStroke   | Weighted mode             | 12 | 1.0547 | 0.8715 | 1.2764 | 0.5953 | 0.0183  | 0.0479 | 0.7107 | 6.8823  | 0.7365 | -54.4672     |
| g_Solobacterium  | SmallVesselStroke   | MR Egger                  | 13 | 1.0112 | 0.8979 | 1.1387 | 0.8577 | -0.0152 | 0.0251 | 0.5576 | 9.9513  | 0.5348 | -63.4451     |
| g_Solobacterium  | SmallVesselStroke   | Weighted median           | 13 | 0.9850 | 0.9185 | 1.0564 | 0.6727 | -0.0152 | 0.0251 | 0.5576 | 9.9513  | 0.5348 | -63.4451     |

|                   |                     |                           |    |        |        |        |        |         |        |        |         |        |            |
|-------------------|---------------------|---------------------------|----|--------|--------|--------|--------|---------|--------|--------|---------|--------|------------|
| g_Solobacterium   | SmallVesselStroke   | Inverse variance weighted | 13 | 0.9782 | 0.9302 | 1.0286 | 0.3898 | -0.0152 | 0.0251 | 0.5576 | 9.9513  | 0.5348 | -63.4451   |
| g_Solobacterium   | SmallVesselStroke   | Simple mode               | 13 | 1.0002 | 0.8855 | 1.1298 | 0.9971 | -0.0152 | 0.0251 | 0.5576 | 9.9513  | 0.5348 | -63.4451   |
| g_Solobacterium   | SmallVesselStroke   | Weighted mode             | 13 | 1.0124 | 0.9015 | 1.1369 | 0.8390 | -0.0152 | 0.0251 | 0.5576 | 9.9513  | 0.5348 | -63.4451   |
| g_Solobacterium   | Stroke              | MR Egger                  | 15 | 1.0061 | 0.9340 | 1.0839 | 0.8743 | -0.0102 | 0.0154 | 0.5223 | 21.2345 | 0.0684 | -71.1905   |
| g_Solobacterium   | Stroke              | Weighted median           | 15 | 0.9750 | 0.9422 | 1.0089 | 0.1468 | -0.0102 | 0.0154 | 0.5223 | 21.2345 | 0.0684 | -71.1905   |
| g_Solobacterium   | Stroke              | Inverse variance weighted | 15 | 0.9835 | 0.9547 | 1.0131 | 0.2710 | -0.0102 | 0.0154 | 0.5223 | 21.2345 | 0.0684 | -71.1905   |
| g_Solobacterium   | Stroke              | Simple mode               | 15 | 0.9693 | 0.9189 | 1.0224 | 0.2709 | -0.0102 | 0.0154 | 0.5223 | 21.2345 | 0.0684 | -71.1905   |
| g_Solobacterium   | Stroke              | Weighted mode             | 15 | 0.9754 | 0.9303 | 1.0228 | 0.3209 | -0.0102 | 0.0154 | 0.5223 | 21.2345 | 0.0684 | -71.1905   |
| g_Subdoligranulum | CardioEmbolicStroke | MR Egger                  | 11 | 1.0664 | 0.6854 | 1.6593 | 0.7819 | 0.0055  | 0.0547 | 0.9219 | 11.5038 | 0.2427 | -2180.5644 |
| g_Subdoligranulum | CardioEmbolicStroke | Weighted median           | 11 | 1.0089 | 0.7972 | 1.2767 | 0.9414 | 0.0055  | 0.0547 | 0.9219 | 11.5038 | 0.2427 | -2180.5644 |
| g_Subdoligranulum | CardioEmbolicStroke | Inverse variance weighted | 11 | 1.0888 | 0.9167 | 1.2931 | 0.3323 | 0.0055  | 0.0547 | 0.9219 | 11.5038 | 0.2427 | -2180.5644 |
| g_Subdoligranulum | CardioEmbolicStroke | Simple mode               | 11 | 0.9393 | 0.6544 | 1.3481 | 0.7410 | 0.0055  | 0.0547 | 0.9219 | 11.5038 | 0.2427 | -2180.5644 |
| g_Subdoligranulum | CardioEmbolicStroke | Weighted mode             | 11 | 0.9532 | 0.6997 | 1.2987 | 0.7677 | 0.0055  | 0.0547 | 0.9219 | 11.5038 | 0.2427 | -2180.5644 |
| g_Subdoligranulum | IschemicStroke      | MR Egger                  | 13 | 1.0683 | 0.9773 | 1.1677 | 0.1739 | -0.0158 | 0.0112 | 0.1851 | 11.0420 | 0.5253 | -1977.8004 |
| g_Subdoligranulum | IschemicStroke      | Weighted median           | 13 | 1.0409 | 0.9882 | 1.0965 | 0.1307 | -0.0158 | 0.0112 | 0.1851 | 11.0420 | 0.5253 | -1977.8004 |
| g_Subdoligranulum | IschemicStroke      | Inverse variance weighted | 13 | 1.0074 | 0.9716 | 1.0446 | 0.6895 | -0.0158 | 0.0112 | 0.1851 | 11.0420 | 0.5253 | -1977.8004 |
| g_Subdoligranulum | IschemicStroke      | Simple mode               | 13 | 1.0423 | 0.9455 | 1.1491 | 0.4208 | -0.0158 | 0.0112 | 0.1851 | 11.0420 | 0.5253 | -1977.8004 |
| g_Subdoligranulum | IschemicStroke      | Weighted mode             | 13 | 1.0487 | 0.9762 | 1.1267 | 0.2177 | -0.0158 | 0.0112 | 0.1851 | 11.0420 | 0.5253 | -1977.8004 |
| g_Subdoligranulum | LargeArteryStroke   | MR Egger                  | 12 | 1.1612 | 0.8384 | 1.6083 | 0.3895 | -0.0153 | 0.0406 | 0.7147 | 12.7255 | 0.2394 | -694.2634  |
| g_Subdoligranulum | LargeArteryStroke   | Weighted median           | 12 | 1.0847 | 0.9183 | 1.2812 | 0.3387 | -0.0153 | 0.0406 | 0.7147 | 12.7255 | 0.2394 | -694.2634  |
| g_Subdoligranulum | LargeArteryStroke   | Inverse variance weighted | 12 | 1.0969 | 0.9650 | 1.2467 | 0.1571 | -0.0153 | 0.0406 | 0.7147 | 12.7255 | 0.2394 | -694.2634  |
| g_Subdoligranulum | LargeArteryStroke   | Simple mode               | 12 | 0.9818 | 0.7515 | 1.2828 | 0.8955 | -0.0153 | 0.0406 | 0.7147 | 12.7255 | 0.2394 | -694.2634  |
| g_Subdoligranulum | LargeArteryStroke   | Weighted mode             | 12 | 1.0802 | 0.8688 | 1.3430 | 0.5019 | -0.0153 | 0.0406 | 0.7147 | 12.7255 | 0.2394 | -694.2634  |
| g_Subdoligranulum | SmallVesselStroke   | MR Egger                  | 12 | 1.0448 | 0.8816 | 1.2382 | 0.6242 | -0.0119 | 0.0212 | 0.5861 | 11.1637 | 0.3449 | -3356.5251 |
| g_Subdoligranulum | SmallVesselStroke   | Weighted median           | 12 | 1.0148 | 0.9268 | 1.1113 | 0.7505 | -0.0119 | 0.0212 | 0.5861 | 11.1637 | 0.3449 | -3356.5251 |
| g_Subdoligranulum | SmallVesselStroke   | Inverse variance weighted | 12 | 0.9993 | 0.9342 | 1.0690 | 0.9842 | -0.0119 | 0.0212 | 0.5861 | 11.1637 | 0.3449 | -3356.5251 |
| g_Subdoligranulum | SmallVesselStroke   | Simple mode               | 12 | 0.9971 | 0.8617 | 1.1536 | 0.9691 | -0.0119 | 0.0212 | 0.5861 | 11.1637 | 0.3449 | -3356.5251 |
| g_Subdoligranulum | SmallVesselStroke   | Weighted mode             | 12 | 1.0199 | 0.9025 | 1.1526 | 0.7582 | -0.0119 | 0.0212 | 0.5861 | 11.1637 | 0.3449 | -3356.5251 |
| g_Subdoligranulum | Stroke              | MR Egger                  | 13 | 1.0354 | 0.9525 | 1.1255 | 0.4316 | -0.0099 | 0.0103 | 0.3585 | 12.1519 | 0.3523 | -2767.6006 |
| g_Subdoligranulum | Stroke              | Weighted median           | 13 | 1.0168 | 0.9739 | 1.0617 | 0.4488 | -0.0099 | 0.0103 | 0.3585 | 12.1519 | 0.3523 | -2767.6006 |
| g_Subdoligranulum | Stroke              | Inverse variance weighted | 13 | 0.9972 | 0.9654 | 1.0300 | 0.8646 | -0.0099 | 0.0103 | 0.3585 | 12.1519 | 0.3523 | -2767.6006 |
| g_Subdoligranulum | Stroke              | Simple mode               | 13 | 1.0240 | 0.9388 | 1.1169 | 0.6019 | -0.0099 | 0.0103 | 0.3585 | 12.1519 | 0.3523 | -2767.6006 |
| g_Subdoligranulum | Stroke              | Weighted mode             | 13 | 1.0383 | 0.9736 | 1.1073 | 0.2751 | -0.0099 | 0.0103 | 0.3585 | 12.1519 | 0.3523 | -2767.6006 |
| g_Sutterella      | CardioEmbolicStroke | MR Egger                  | 12 | 1.0011 | 0.8746 | 1.1460 | 0.9871 | 0.0016  | 0.0444 | 0.9728 | 7.7944  | 0.6489 | -33.2556   |
| g_Sutterella      | CardioEmbolicStroke | Weighted median           | 12 | 1.0006 | 0.9333 | 1.0728 | 0.9861 | 0.0016  | 0.0444 | 0.9728 | 7.7944  | 0.6489 | -33.2556   |
| g_Sutterella      | CardioEmbolicStroke | Inverse variance weighted | 12 | 1.0034 | 0.9528 | 1.0566 | 0.8984 | 0.0016  | 0.0444 | 0.9728 | 7.7944  | 0.6489 | -33.2556   |
| g_Sutterella      | CardioEmbolicStroke | Simple mode               | 12 | 0.9729 | 0.8677 | 1.0908 | 0.6470 | 0.0016  | 0.0444 | 0.9728 | 7.7944  | 0.6489 | -33.2556   |
| g_Sutterella      | CardioEmbolicStroke | Weighted mode             | 12 | 0.9818 | 0.8876 | 1.0860 | 0.7275 | 0.0016  | 0.0444 | 0.9728 | 7.7944  | 0.6489 | -33.2556   |
| g_Sutterella      | IschemicStroke      | MR Egger                  | 19 | 0.9975 | 0.9748 | 1.0207 | 0.8317 | -0.0011 | 0.0087 | 0.9003 | 19.5290 | 0.2990 | -30.5185   |
| g_Sutterella      | IschemicStroke      | Weighted median           | 19 | 0.9989 | 0.9851 | 1.0128 | 0.8713 | -0.0011 | 0.0087 | 0.9003 | 19.5290 | 0.2990 | -30.5185   |
| g_Sutterella      | IschemicStroke      | Inverse variance weighted | 19 | 0.9961 | 0.9859 | 1.0065 | 0.4649 | -0.0011 | 0.0087 | 0.9003 | 19.5290 | 0.2990 | -30.5185   |
| g_Sutterella      | IschemicStroke      | Simple mode               | 19 | 1.0018 | 0.9783 | 1.0260 | 0.8824 | -0.0011 | 0.0087 | 0.9003 | 19.5290 | 0.2990 | -30.5185   |
| g_Sutterella      | IschemicStroke      | Weighted mode             | 19 | 1.0025 | 0.9808 | 1.0248 | 0.8242 | -0.0011 | 0.0087 | 0.9003 | 19.5290 | 0.2990 | -30.5185   |
| g_Sutterella      | LargeArteryStroke   | MR Egger                  | 17 | 1.0043 | 0.9222 | 1.0936 | 0.9233 | -0.0223 | 0.0301 | 0.4709 | 9.1183  | 0.8712 | -16.5418   |
| g_Sutterella      | LargeArteryStroke   | Weighted median           | 17 | 0.9654 | 0.9199 | 1.0131 | 0.1526 | -0.0223 | 0.0301 | 0.4709 | 9.1183  | 0.8712 | -16.5418   |
| g_Sutterella      | LargeArteryStroke   | Inverse variance weighted | 17 | 0.9752 | 0.9418 | 1.0098 | 0.1576 | -0.0223 | 0.0301 | 0.4709 | 9.1183  | 0.8712 | -16.5418   |
| g_Sutterella      | LargeArteryStroke   | Simple mode               | 17 | 0.9473 | 0.8670 | 1.0351 | 0.2490 | -0.0223 | 0.0301 | 0.4709 | 9.1183  | 0.8712 | -16.5418   |
| g_Sutterella      | LargeArteryStroke   | Weighted mode             | 17 | 0.9576 | 0.8920 | 1.0279 | 0.2482 | -0.0223 | 0.0301 | 0.4709 | 9.1183  | 0.8712 | -16.5418   |
| g_Sutterella      | SmallVesselStroke   | MR Egger                  | 18 | 0.9903 | 0.9418 | 1.0413 | 0.7084 | 0.0078  | 0.0186 | 0.6798 | 24.3542 | 0.0820 | -16.3525   |
| g_Sutterella      | SmallVesselStroke   | Weighted median           | 18 | 1.0037 | 0.9781 | 1.0300 | 0.7790 | 0.0078  | 0.0186 | 0.6798 | 24.3542 | 0.0820 | -16.3525   |
| g_Sutterella      | SmallVesselStroke   | Inverse variance weighted | 18 | 0.9999 | 0.9780 | 1.0222 | 0.9905 | 0.0078  | 0.0186 | 0.6798 | 24.3542 | 0.0820 | -16.3525   |
| g_Sutterella      | SmallVesselStroke   | Simple mode               | 18 | 1.0019 | 0.9620 | 1.0436 | 0.9265 | 0.0078  | 0.0186 | 0.6798 | 24.3542 | 0.0820 | -16.3525   |
| g_Sutterella      | SmallVesselStroke   | Weighted mode             | 18 | 1.0019 | 0.9653 | 1.0400 | 0.9197 | 0.0078  | 0.0186 | 0.6798 | 24.3542 | 0.0820 | -16.3525   |

|                |                     |                           |    |        |        |        |        |         |        |        |         |        |           |
|----------------|---------------------|---------------------------|----|--------|--------|--------|--------|---------|--------|--------|---------|--------|-----------|
| g_Sutterella   | Stroke              | MR Egger                  | 19 | 0.9991 | 0.9748 | 1.0240 | 0.9439 | -0.0009 | 0.0090 | 0.9229 | 25.3005 | 0.0882 | -34.9834  |
| g_Sutterella   | Stroke              | Weighted median           | 19 | 1.0022 | 0.9899 | 1.0147 | 0.7232 | -0.0009 | 0.0090 | 0.9229 | 25.3005 | 0.0882 | -34.9834  |
| g_Sutterella   | Stroke              | Inverse variance weighted | 19 | 0.9980 | 0.9876 | 1.0085 | 0.7062 | -0.0009 | 0.0090 | 0.9229 | 25.3005 | 0.0882 | -34.9834  |
| g_Sutterella   | Stroke              | Simple mode               | 19 | 1.0037 | 0.9852 | 1.0225 | 0.7028 | -0.0009 | 0.0090 | 0.9229 | 25.3005 | 0.0882 | -34.9834  |
| g_Sutterella   | Stroke              | Weighted mode             | 19 | 1.0037 | 0.9865 | 1.0211 | 0.6805 | -0.0009 | 0.0090 | 0.9229 | 25.3005 | 0.0882 | -34.9834  |
| g_Tannerella   | CardioEmbolicStroke | MR Egger                  | 11 | 1.1095 | 0.8445 | 1.4577 | 0.4747 | -0.0408 | 0.0461 | 0.3999 | 7.3604  | 0.5997 | -234.0532 |
| g_Tannerella   | CardioEmbolicStroke | Weighted median           | 11 | 0.9578 | 0.8310 | 1.1040 | 0.5522 | -0.0408 | 0.0461 | 0.3999 | 7.3604  | 0.5997 | -234.0532 |
| g_Tannerella   | CardioEmbolicStroke | Inverse variance weighted | 11 | 0.9908 | 0.8902 | 1.1027 | 0.8650 | -0.0408 | 0.0461 | 0.3999 | 7.3604  | 0.5997 | -234.0532 |
| g_Tannerella   | CardioEmbolicStroke | Simple mode               | 11 | 0.8777 | 0.6771 | 1.1378 | 0.3479 | -0.0408 | 0.0461 | 0.3999 | 7.3604  | 0.5997 | -234.0532 |
| g_Tannerella   | CardioEmbolicStroke | Weighted mode             | 11 | 0.9414 | 0.7752 | 1.1431 | 0.5554 | -0.0408 | 0.0461 | 0.3999 | 7.3604  | 0.5997 | -234.0532 |
| g_Tannerella   | IschemicStroke      | MR Egger                  | 18 | 1.0021 | 0.9627 | 1.0430 | 0.9203 | -0.0049 | 0.0081 | 0.5525 | 10.4661 | 0.8412 | -93.2305  |
| g_Tannerella   | IschemicStroke      | Weighted median           | 18 | 0.9916 | 0.9653 | 1.0185 | 0.5362 | -0.0049 | 0.0081 | 0.5525 | 10.4661 | 0.8412 | -93.2305  |
| g_Tannerella   | IschemicStroke      | Inverse variance weighted | 18 | 0.9913 | 0.9719 | 1.0111 | 0.3876 | -0.0049 | 0.0081 | 0.5525 | 10.4661 | 0.8412 | -93.2305  |
| g_Tannerella   | IschemicStroke      | Simple mode               | 18 | 0.9916 | 0.9520 | 1.0329 | 0.6910 | -0.0049 | 0.0081 | 0.5525 | 10.4661 | 0.8412 | -93.2305  |
| g_Tannerella   | IschemicStroke      | Weighted mode             | 18 | 0.9910 | 0.9552 | 1.0282 | 0.6384 | -0.0049 | 0.0081 | 0.5525 | 10.4661 | 0.8412 | -93.2305  |
| g_Tannerella   | LargeArteryStroke   | MR Egger                  | 17 | 1.0955 | 0.9616 | 1.2479 | 0.1904 | -0.0278 | 0.0264 | 0.3085 | 12.2949 | 0.7234 | -20.0602  |
| g_Tannerella   | LargeArteryStroke   | Weighted median           | 17 | 1.0472 | 0.9574 | 1.1455 | 0.3134 | -0.0278 | 0.0264 | 0.3085 | 12.2949 | 0.7234 | -20.0602  |
| g_Tannerella   | LargeArteryStroke   | Inverse variance weighted | 17 | 1.0307 | 0.9665 | 1.0990 | 0.3567 | -0.0278 | 0.0264 | 0.3085 | 12.2949 | 0.7234 | -20.0602  |
| g_Tannerella   | LargeArteryStroke   | Simple mode               | 17 | 1.1214 | 0.9530 | 1.3196 | 0.1864 | -0.0278 | 0.0264 | 0.3085 | 12.2949 | 0.7234 | -20.0602  |
| g_Tannerella   | LargeArteryStroke   | Weighted mode             | 17 | 1.1253 | 0.9749 | 1.2988 | 0.1264 | -0.0278 | 0.0264 | 0.3085 | 12.2949 | 0.7234 | -20.0602  |
| g_Tannerella   | SmallVesselStroke   | MR Egger                  | 17 | 1.0106 | 0.9399 | 1.0867 | 0.7794 | -0.0033 | 0.0147 | 0.8254 | 13.0788 | 0.5962 | -28.7120  |
| g_Tannerella   | SmallVesselStroke   | Weighted median           | 17 | 1.0224 | 0.9708 | 1.0767 | 0.4021 | -0.0033 | 0.0147 | 0.8254 | 13.0788 | 0.5962 | -28.7120  |
| g_Tannerella   | SmallVesselStroke   | Inverse variance weighted | 17 | 1.0033 | 0.9681 | 1.0398 | 0.8554 | -0.0033 | 0.0147 | 0.8254 | 13.0788 | 0.5962 | -28.7120  |
| g_Tannerella   | SmallVesselStroke   | Simple mode               | 17 | 1.0183 | 0.9390 | 1.1043 | 0.6673 | -0.0033 | 0.0147 | 0.8254 | 13.0788 | 0.5962 | -28.7120  |
| g_Tannerella   | SmallVesselStroke   | Weighted mode             | 17 | 1.0226 | 0.9553 | 1.0947 | 0.5291 | -0.0033 | 0.0147 | 0.8254 | 13.0788 | 0.5962 | -28.7120  |
| g_Tannerella   | Stroke              | MR Egger                  | 18 | 1.0129 | 0.9776 | 1.0495 | 0.4889 | -0.0088 | 0.0071 | 0.2289 | 9.3419  | 0.9289 | -139.0267 |
| g_Tannerella   | Stroke              | Weighted median           | 18 | 0.9934 | 0.9710 | 1.0164 | 0.5701 | -0.0088 | 0.0071 | 0.2289 | 9.3419  | 0.9289 | -139.0267 |
| g_Tannerella   | Stroke              | Inverse variance weighted | 18 | 0.9931 | 0.9761 | 1.0103 | 0.4281 | -0.0088 | 0.0071 | 0.2289 | 9.3419  | 0.9289 | -139.0267 |
| g_Tannerella   | Stroke              | Simple mode               | 18 | 0.9990 | 0.9613 | 1.0381 | 0.9580 | -0.0088 | 0.0071 | 0.2289 | 9.3419  | 0.9289 | -139.0267 |
| g_Tannerella   | Stroke              | Weighted mode             | 18 | 0.9960 | 0.9653 | 1.0277 | 0.8064 | -0.0088 | 0.0071 | 0.2289 | 9.3419  | 0.9289 | -139.0267 |
| g_Turicibacter | CardioEmbolicStroke | MR Egger                  | 9  | 0.9213 | 0.8315 | 1.0207 | 0.1607 | 0.0454  | 0.0360 | 0.2477 | 9.1819  | 0.3272 | -20.8852  |
| g_Turicibacter | CardioEmbolicStroke | Weighted median           | 9  | 0.9531 | 0.8765 | 1.0363 | 0.2603 | 0.0454  | 0.0360 | 0.2477 | 9.1819  | 0.3272 | -20.8852  |
| g_Turicibacter | CardioEmbolicStroke | Inverse variance weighted | 9  | 0.9713 | 0.9115 | 1.0349 | 0.3677 | 0.0454  | 0.0360 | 0.2477 | 9.1819  | 0.3272 | -20.8852  |
| g_Turicibacter | CardioEmbolicStroke | Simple mode               | 9  | 0.9620 | 0.8513 | 1.0871 | 0.5516 | 0.0454  | 0.0360 | 0.2477 | 9.1819  | 0.3272 | -20.8852  |
| g_Turicibacter | CardioEmbolicStroke | Weighted mode             | 9  | 0.9522 | 0.8730 | 1.0387 | 0.3017 | 0.0454  | 0.0360 | 0.2477 | 9.1819  | 0.3272 | -20.8852  |
| g_Turicibacter | IschemicStroke      | MR Egger                  | 11 | 1.0159 | 0.9967 | 1.0355 | 1.1402 | -0.0082 | 0.0074 | 0.3005 | 8.8252  | 0.5488 | -52.3079  |
| g_Turicibacter | IschemicStroke      | Weighted median           | 11 | 1.0103 | 0.9927 | 1.0281 | 0.2530 | -0.0082 | 0.0074 | 0.3005 | 8.8252  | 0.5488 | -52.3079  |
| g_Turicibacter | IschemicStroke      | Inverse variance weighted | 11 | 1.0075 | 0.9954 | 1.0198 | 0.2259 | -0.0082 | 0.0074 | 0.3005 | 8.8252  | 0.5488 | -52.3079  |
| g_Turicibacter | IschemicStroke      | Simple mode               | 11 | 1.0143 | 0.9854 | 1.0440 | 0.3596 | -0.0082 | 0.0074 | 0.3005 | 8.8252  | 0.5488 | -52.3079  |
| g_Turicibacter | IschemicStroke      | Weighted mode             | 11 | 1.0106 | 0.9933 | 1.0283 | 0.2589 | -0.0082 | 0.0074 | 0.3005 | 8.8252  | 0.5488 | -52.3079  |
| g_Turicibacter | LargeArteryStroke   | MR Egger                  | 10 | 0.9783 | 0.9114 | 1.0501 | 0.5609 | 0.0447  | 0.0257 | 0.1206 | 11.2135 | 0.2614 | -15.4845  |
| g_Turicibacter | LargeArteryStroke   | Weighted median           | 10 | 1.0106 | 0.9506 | 1.0744 | 0.7353 | 0.0447  | 0.0257 | 0.1206 | 11.2135 | 0.2614 | -15.4845  |
| g_Turicibacter | LargeArteryStroke   | Inverse variance weighted | 10 | 1.0285 | 0.9809 | 1.0784 | 0.2457 | 0.0447  | 0.0257 | 0.1206 | 11.2135 | 0.2614 | -15.4845  |
| g_Turicibacter | LargeArteryStroke   | Simple mode               | 10 | 1.1234 | 0.9764 | 1.2926 | 0.1385 | 0.0447  | 0.0257 | 0.1206 | 11.2135 | 0.2614 | -15.4845  |
| g_Turicibacter | LargeArteryStroke   | Weighted mode             | 10 | 0.9883 | 0.9300 | 1.0502 | 0.7122 | 0.0447  | 0.0257 | 0.1206 | 11.2135 | 0.2614 | -15.4845  |
| g_Turicibacter | SmallVesselStroke   | MR Egger                  | 10 | 1.0258 | 0.9866 | 1.0665 | 0.2364 | -0.0148 | 0.0141 | 0.3261 | 4.4506  | 0.8793 | -65.6782  |
| g_Turicibacter | SmallVesselStroke   | Weighted median           | 10 | 1.0202 | 0.9876 | 1.0538 | 0.2274 | -0.0148 | 0.0141 | 0.3261 | 4.4506  | 0.8793 | -65.6782  |
| g_Turicibacter | SmallVesselStroke   | Inverse variance weighted | 10 | 1.0089 | 0.9854 | 1.0330 | 0.4598 | -0.0148 | 0.0141 | 0.3261 | 4.4506  | 0.8793 | -65.6782  |
| g_Turicibacter | SmallVesselStroke   | Simple mode               | 10 | 1.0223 | 0.9743 | 1.0727 | 0.3920 | -0.0148 | 0.0141 | 0.3261 | 4.4506  | 0.8793 | -65.6782  |
| g_Turicibacter | SmallVesselStroke   | Weighted mode             | 10 | 1.0212 | 0.9863 | 1.0573 | 0.2671 | -0.0148 | 0.0141 | 0.3261 | 4.4506  | 0.8793 | -65.6782  |
| g_Turicibacter | Stroke              | MR Egger                  | 12 | 1.0219 | 1.0013 | 1.0429 | 0.0633 | -0.0124 | 0.0070 | 0.1082 | 9.5229  | 0.5737 | -64.3392  |
| g_Turicibacter | Stroke              | Weighted median           | 12 | 1.0072 | 0.9902 | 1.0246 | 0.4094 | -0.0124 | 0.0070 | 0.1082 | 9.5229  | 0.5737 | -64.3392  |
| g_Turicibacter | Stroke              | Inverse variance weighted | 12 | 1.0067 | 0.9950 | 1.0185 | 0.2620 | -0.0124 | 0.0070 | 0.1082 | 9.5229  | 0.5737 | -64.3392  |

|                      |                     |                           |    |        |        |        |        |         |        |        |         |        |            |
|----------------------|---------------------|---------------------------|----|--------|--------|--------|--------|---------|--------|--------|---------|--------|------------|
| g_Turicibacter       | Stroke              | Simple mode               | 12 | 0.9953 | 0.9653 | 1.0262 | 0.7674 | -0.0124 | 0.0070 | 0.1082 | 9.5229  | 0.5737 | -64.3392   |
| g_Turicibacter       | Stroke              | Weighted mode             | 12 | 1.0128 | 0.9956 | 1.0304 | 0.1744 | -0.0124 | 0.0070 | 0.1082 | 9.5229  | 0.5737 | -64.3392   |
| g_Veillonella        | CardioEmbolicStroke | MR Egger                  | 8  | 1.1097 | 0.5677 | 2.1690 | 0.7711 | -0.0200 | 0.1030 | 0.8524 | 7.9694  | 0.2404 | 31113.1062 |
| g_Veillonella        | CardioEmbolicStroke | Weighted median           | 8  | 0.9908 | 0.8370 | 1.1729 | 0.9146 | -0.0200 | 0.1030 | 0.8524 | 7.9694  | 0.2404 | 31113.1062 |
| g_Veillonella        | CardioEmbolicStroke | Inverse variance weighted | 8  | 1.0401 | 0.9055 | 1.1947 | 0.5781 | -0.0200 | 0.1030 | 0.8524 | 7.9694  | 0.2404 | 31113.1062 |
| g_Veillonella        | CardioEmbolicStroke | Simple mode               | 8  | 0.9779 | 0.7609 | 1.2568 | 0.8664 | -0.0200 | 0.1030 | 0.8524 | 7.9694  | 0.2404 | 31113.1062 |
| g_Veillonella        | CardioEmbolicStroke | Weighted mode             | 8  | 1.0006 | 0.8000 | 1.2517 | 0.9957 | -0.0200 | 0.1030 | 0.8524 | 7.9694  | 0.2404 | 31113.1062 |
| g_Veillonella        | IschemicStroke      | MR Egger                  | 11 | 1.0244 | 0.9566 | 1.0969 | 0.5078 | -0.0093 | 0.0120 | 0.4570 | 6.9842  | 0.6388 | -594.9563  |
| g_Veillonella        | IschemicStroke      | Weighted median           | 11 | 1.0013 | 0.9649 | 1.0392 | 0.9433 | -0.0093 | 0.0120 | 0.4570 | 6.9842  | 0.6388 | -594.9563  |
| g_Veillonella        | IschemicStroke      | Inverse variance weighted | 11 | 0.9989 | 0.9740 | 1.0244 | 0.9293 | -0.0093 | 0.0120 | 0.4570 | 6.9842  | 0.6388 | -594.9563  |
| g_Veillonella        | IschemicStroke      | Simple mode               | 11 | 0.9941 | 0.9422 | 1.0489 | 0.8338 | -0.0093 | 0.0120 | 0.4570 | 6.9842  | 0.6388 | -594.9563  |
| g_Veillonella        | IschemicStroke      | Weighted mode             | 11 | 0.9982 | 0.9479 | 1.0513 | 0.9478 | -0.0093 | 0.0120 | 0.4570 | 6.9842  | 0.6388 | -594.9563  |
| g_Veillonella        | LargeArteryStroke   | MR Egger                  | 10 | 1.1259 | 0.8749 | 1.4489 | 0.3837 | -0.0294 | 0.0426 | 0.5088 | 5.9109  | 0.6572 | -222.4651  |
| g_Veillonella        | LargeArteryStroke   | Weighted median           | 10 | 1.0137 | 0.8992 | 1.1428 | 0.8237 | -0.0294 | 0.0426 | 0.5088 | 5.9109  | 0.6572 | -222.4651  |
| g_Veillonella        | LargeArteryStroke   | Inverse variance weighted | 10 | 1.0356 | 0.9502 | 1.1285 | 0.4257 | -0.0294 | 0.0426 | 0.5088 | 5.9109  | 0.6572 | -222.4651  |
| g_Veillonella        | LargeArteryStroke   | Simple mode               | 10 | 1.0219 | 0.8533 | 1.2239 | 0.8191 | -0.0294 | 0.0426 | 0.5088 | 5.9109  | 0.6572 | -222.4651  |
| g_Veillonella        | LargeArteryStroke   | Weighted mode             | 10 | 1.0168 | 0.8395 | 1.2314 | 0.8687 | -0.0294 | 0.0426 | 0.5088 | 5.9109  | 0.6572 | -222.4651  |
| g_Veillonella        | SmallVesselStroke   | MR Egger                  | 10 | 1.0879 | 0.9465 | 1.2505 | 0.2695 | -0.0242 | 0.0235 | 0.3323 | 3.0717  | 0.9614 | -574.7601  |
| g_Veillonella        | SmallVesselStroke   | Weighted median           | 10 | 1.0237 | 0.9630 | 1.0881 | 0.4527 | -0.0242 | 0.0235 | 0.3323 | 3.0717  | 0.9614 | -574.7601  |
| g_Veillonella        | SmallVesselStroke   | Inverse variance weighted | 10 | 1.0156 | 0.9680 | 1.0655 | 0.5275 | -0.0242 | 0.0235 | 0.3323 | 3.0717  | 0.9614 | -574.7601  |
| g_Veillonella        | SmallVesselStroke   | Simple mode               | 10 | 1.0340 | 0.9421 | 1.1348 | 0.4989 | -0.0242 | 0.0235 | 0.3323 | 3.0717  | 0.9614 | -574.7601  |
| g_Veillonella        | SmallVesselStroke   | Weighted mode             | 10 | 1.0470 | 0.9543 | 1.1486 | 0.3571 | -0.0242 | 0.0235 | 0.3323 | 3.0717  | 0.9614 | -574.7601  |
| g_Veillonella        | Stroke              | MR Egger                  | 13 | 1.0094 | 0.9583 | 1.0631 | 0.7312 | -0.0046 | 0.0094 | 0.6349 | 5.3131  | 0.9151 | -318.1092  |
| g_Veillonella        | Stroke              | Weighted median           | 13 | 0.9984 | 0.9719 | 1.0257 | 0.9080 | -0.0046 | 0.0094 | 0.6349 | 5.3131  | 0.9151 | -318.1092  |
| g_Veillonella        | Stroke              | Inverse variance weighted | 13 | 0.9975 | 0.9770 | 1.0184 | 0.8115 | -0.0046 | 0.0094 | 0.6349 | 5.3131  | 0.9151 | -318.1092  |
| g_Veillonella        | Stroke              | Simple mode               | 13 | 0.9902 | 0.9473 | 1.0350 | 0.6699 | -0.0046 | 0.0094 | 0.6349 | 5.3131  | 0.9151 | -318.1092  |
| g_Veillonella        | Stroke              | Weighted mode             | 13 | 0.9905 | 0.9517 | 1.0309 | 0.6483 | -0.0046 | 0.0094 | 0.6349 | 5.3131  | 0.9151 | -318.1092  |
| g_Vibrio             | CardioEmbolicStroke | MR Egger                  | 13 | 1.1019 | 0.7188 | 1.6892 | 0.6649 | -0.0287 | 0.0959 | 0.7703 | 16.0663 | 0.1387 | -47.6187   |
| g_Vibrio             | CardioEmbolicStroke | Weighted median           | 13 | 1.0525 | 0.9470 | 1.1697 | 0.3423 | -0.0287 | 0.0959 | 0.7703 | 16.0663 | 0.1387 | -47.6187   |
| g_Vibrio             | CardioEmbolicStroke | Inverse variance weighted | 13 | 1.0337 | 0.9512 | 1.1233 | 0.4347 | -0.0287 | 0.0959 | 0.7703 | 16.0663 | 0.1387 | -47.6187   |
| g_Vibrio             | CardioEmbolicStroke | Simple mode               | 13 | 1.1023 | 0.9201 | 1.3207 | 0.3114 | -0.0287 | 0.0959 | 0.7703 | 16.0663 | 0.1387 | -47.6187   |
| g_Vibrio             | CardioEmbolicStroke | Weighted mode             | 13 | 1.1004 | 0.9200 | 1.3162 | 0.3157 | -0.0287 | 0.0959 | 0.7703 | 16.0663 | 0.1387 | -47.6187   |
| g_Vibrio             | IschemicStroke      | MR Egger                  | 19 | 0.9938 | 0.9679 | 1.0204 | 0.6505 | 0.0024  | 0.0075 | 0.7492 | 18.3436 | 0.3675 | -34.8271   |
| g_Vibrio             | IschemicStroke      | Weighted median           | 19 | 0.9889 | 0.9707 | 1.0074 | 0.2384 | 0.0024  | 0.0075 | 0.7492 | 18.3436 | 0.3675 | -34.8271   |
| g_Vibrio             | IschemicStroke      | Inverse variance weighted | 19 | 0.9976 | 0.9847 | 1.0106 | 0.7134 | 0.0024  | 0.0075 | 0.7492 | 18.3436 | 0.3675 | -34.8271   |
| g_Vibrio             | IschemicStroke      | Simple mode               | 19 | 0.9903 | 0.9585 | 1.0231 | 0.5635 | 0.0024  | 0.0075 | 0.7492 | 18.3436 | 0.3675 | -34.8271   |
| g_Vibrio             | IschemicStroke      | Weighted mode             | 19 | 0.9882 | 0.9629 | 1.0142 | 0.3829 | 0.0024  | 0.0075 | 0.7492 | 18.3436 | 0.3675 | -34.8271   |
| g_Vibrio             | LargeArteryStroke   | MR Egger                  | 14 | 0.9666 | 0.8304 | 1.1251 | 0.6690 | 0.0290  | 0.0362 | 0.4388 | 11.2143 | 0.5106 | -42.0110   |
| g_Vibrio             | LargeArteryStroke   | Weighted median           | 14 | 0.9929 | 0.9256 | 1.0651 | 0.8426 | 0.0290  | 0.0362 | 0.4388 | 11.2143 | 0.5106 | -42.0110   |
| g_Vibrio             | LargeArteryStroke   | Inverse variance weighted | 14 | 1.0249 | 0.9745 | 1.0779 | 0.3396 | 0.0290  | 0.0362 | 0.4388 | 11.2143 | 0.5106 | -42.0110   |
| g_Vibrio             | LargeArteryStroke   | Simple mode               | 14 | 0.9763 | 0.8579 | 1.1110 | 0.7219 | 0.0290  | 0.0362 | 0.4388 | 11.2143 | 0.5106 | -42.0110   |
| g_Vibrio             | LargeArteryStroke   | Weighted mode             | 14 | 0.9763 | 0.8708 | 1.0946 | 0.6876 | 0.0290  | 0.0362 | 0.4388 | 11.2143 | 0.5106 | -42.0110   |
| g_Vibrio             | SmallVesselStroke   | MR Egger                  | 16 | 1.0117 | 0.9619 | 1.0642 | 0.6578 | -0.0061 | 0.0137 | 0.6613 | 7.1286  | 0.9296 | -59.9623   |
| g_Vibrio             | SmallVesselStroke   | Weighted median           | 16 | 0.9997 | 0.9665 | 1.0341 | 0.9863 | -0.0061 | 0.0137 | 0.6613 | 7.1286  | 0.9296 | -59.9623   |
| g_Vibrio             | SmallVesselStroke   | Inverse variance weighted | 16 | 1.0016 | 0.9775 | 1.0262 | 0.9004 | -0.0061 | 0.0137 | 0.6613 | 7.1286  | 0.9296 | -59.9623   |
| g_Vibrio             | SmallVesselStroke   | Simple mode               | 16 | 0.9979 | 0.9473 | 1.0512 | 0.9376 | -0.0061 | 0.0137 | 0.6613 | 7.1286  | 0.9296 | -59.9623   |
| g_Vibrio             | SmallVesselStroke   | Weighted mode             | 16 | 0.9987 | 0.9527 | 1.0469 | 0.9588 | -0.0061 | 0.0137 | 0.6613 | 7.1286  | 0.9296 | -59.9623   |
| g_Vibrio             | Stroke              | MR Egger                  | 17 | 1.0061 | 0.9767 | 1.0363 | 0.6950 | -0.0045 | 0.0077 | 0.5673 | 16.6902 | 0.3377 | -53.4758   |
| g_Vibrio             | Stroke              | Weighted median           | 17 | 0.9926 | 0.9760 | 1.0095 | 0.3880 | -0.0045 | 0.0077 | 0.5673 | 16.6902 | 0.3377 | -53.4758   |
| g_Vibrio             | Stroke              | Inverse variance weighted | 17 | 0.9981 | 0.9856 | 1.0107 | 0.7631 | -0.0045 | 0.0077 | 0.5673 | 16.6902 | 0.3377 | -53.4758   |
| g_Vibrio             | Stroke              | Simple mode               | 17 | 0.9926 | 0.9638 | 1.0223 | 0.6293 | -0.0045 | 0.0077 | 0.5673 | 16.6902 | 0.3377 | -53.4758   |
| g_Vibrio             | Stroke              | Weighted mode             | 17 | 0.9909 | 0.9674 | 1.0150 | 0.4657 | -0.0045 | 0.0077 | 0.5673 | 16.6902 | 0.3377 | -53.4758   |
| log_f_Aeromonadaceae | CardioEmbolicStroke | MR Egger                  | 11 | 0.9175 | 0.6929 | 1.2148 | 0.5623 | 0.0293  | 0.0674 | 0.6738 | 5.2265  | 0.8141 | -77.8977   |

|                       |                     |                           |    |        |        |        |        |         |        |        |         |        |           |
|-----------------------|---------------------|---------------------------|----|--------|--------|--------|--------|---------|--------|--------|---------|--------|-----------|
| log_f_Aeromonadaceae  | CardioEmbolicStroke | Weighted median           | 11 | 0.9861 | 0.8868 | 1.0965 | 0.7957 | 0.0293  | 0.0674 | 0.6738 | 5.2265  | 0.8141 | -77.8977  |
| log_f_Aeromonadaceae  | CardioEmbolicStroke | Inverse variance weighted | 11 | 0.9738 | 0.8980 | 1.0561 | 0.5216 | 0.0293  | 0.0674 | 0.6738 | 5.2265  | 0.8141 | -77.8977  |
| log_f_Aeromonadaceae  | CardioEmbolicStroke | Simple mode               | 11 | 0.9794 | 0.8329 | 1.1518 | 0.8068 | 0.0293  | 0.0674 | 0.6738 | 5.2265  | 0.8141 | -77.8977  |
| log_f_Aeromonadaceae  | CardioEmbolicStroke | Weighted mode             | 11 | 0.9840 | 0.8368 | 1.1570 | 0.8489 | 0.0293  | 0.0674 | 0.6738 | 5.2265  | 0.8141 | -77.8977  |
| log_f_Aeromonadaceae  | IschemicStroke      | MR Egger                  | 12 | 1.0251 | 0.9640 | 1.0900 | 0.4478 | -0.0098 | 0.0150 | 0.5285 | 6.0207  | 0.8135 | -238.6712 |
| log_f_Aeromonadaceae  | IschemicStroke      | Weighted median           | 12 | 1.0091 | 0.9858 | 1.0329 | 0.4493 | -0.0098 | 0.0150 | 0.5285 | 6.0207  | 0.8135 | -238.6712 |
| log_f_Aeromonadaceae  | IschemicStroke      | Inverse variance weighted | 12 | 1.0052 | 0.9872 | 1.0236 | 0.5737 | -0.0098 | 0.0150 | 0.5285 | 6.0207  | 0.8135 | -238.6712 |
| log_f_Aeromonadaceae  | IschemicStroke      | Simple mode               | 12 | 1.0125 | 0.9773 | 1.0489 | 0.5066 | -0.0098 | 0.0150 | 0.5285 | 6.0207  | 0.8135 | -238.6712 |
| log_f_Aeromonadaceae  | IschemicStroke      | Weighted mode             | 12 | 1.0121 | 0.9779 | 1.0474 | 0.5072 | -0.0098 | 0.0150 | 0.5285 | 6.0207  | 0.8135 | -238.6712 |
| log_f_Aeromonadaceae  | LargeArteryStroke   | MR Egger                  | 12 | 1.0042 | 0.7709 | 1.3081 | 0.9760 | -0.0196 | 0.0645 | 0.7672 | 17.3969 | 0.0660 | -42.0544  |
| log_f_Aeromonadaceae  | LargeArteryStroke   | Weighted median           | 12 | 0.9564 | 0.8802 | 1.0391 | 0.2921 | -0.0196 | 0.0645 | 0.7672 | 17.3969 | 0.0660 | -42.0544  |
| log_f_Aeromonadaceae  | LargeArteryStroke   | Inverse variance weighted | 12 | 0.9656 | 0.8961 | 1.0403 | 0.3571 | -0.0196 | 0.0645 | 0.7672 | 17.3969 | 0.0660 | -42.0544  |
| log_f_Aeromonadaceae  | LargeArteryStroke   | Simple mode               | 12 | 0.9483 | 0.8171 | 1.1006 | 0.4994 | -0.0196 | 0.0645 | 0.7672 | 17.3969 | 0.0660 | -42.0544  |
| log_f_Aeromonadaceae  | LargeArteryStroke   | Weighted mode             | 12 | 0.9426 | 0.8314 | 1.0686 | 0.3756 | -0.0196 | 0.0645 | 0.7672 | 17.3969 | 0.0660 | -42.0544  |
| log_f_Aeromonadaceae  | SmallVesselStroke   | MR Egger                  | 12 | 1.0289 | 0.9207 | 1.1498 | 0.6261 | 0.0040  | 0.0271 | 0.8863 | 4.9914  | 0.8918 | -134.1560 |
| log_f_Aeromonadaceae  | SmallVesselStroke   | Weighted median           | 12 | 1.0343 | 0.9899 | 1.0807 | 0.1315 | 0.0040  | 0.0271 | 0.8863 | 4.9914  | 0.8918 | -134.1560 |
| log_f_Aeromonadaceae  | SmallVesselStroke   | Inverse variance weighted | 12 | 1.0371 | 1.0036 | 1.0717 | 0.0295 | 0.0040  | 0.0271 | 0.8863 | 4.9914  | 0.8918 | -134.1560 |
| log_f_Aeromonadaceae  | SmallVesselStroke   | Simple mode               | 12 | 1.0362 | 0.9709 | 1.1059 | 0.3077 | 0.0040  | 0.0271 | 0.8863 | 4.9914  | 0.8918 | -134.1560 |
| log_f_Aeromonadaceae  | SmallVesselStroke   | Weighted mode             | 12 | 1.0350 | 0.9740 | 1.0998 | 0.2911 | 0.0040  | 0.0271 | 0.8863 | 4.9914  | 0.8918 | -134.1560 |
| log_f_Aeromonadaceae  | Stroke              | MR Egger                  | 13 | 1.0049 | 0.9538 | 1.0587 | 0.8574 | 0.0018  | 0.0126 | 0.8907 | 7.1573  | 0.7862 | -264.5863 |
| log_f_Aeromonadaceae  | Stroke              | Weighted median           | 13 | 1.0107 | 0.9912 | 1.0305 | 0.2844 | 0.0018  | 0.0126 | 0.8907 | 7.1573  | 0.7862 | -264.5863 |
| log_f_Aeromonadaceae  | Stroke              | Inverse variance weighted | 13 | 1.0085 | 0.9933 | 1.0240 | 0.2759 | 0.0018  | 0.0126 | 0.8907 | 7.1573  | 0.7862 | -264.5863 |
| log_f_Aeromonadaceae  | Stroke              | Simple mode               | 13 | 1.0070 | 0.9767 | 1.0382 | 0.6639 | 0.0018  | 0.0126 | 0.8907 | 7.1573  | 0.7862 | -264.5863 |
| log_f_Aeromonadaceae  | Stroke              | Weighted mode             | 13 | 1.0096 | 0.9818 | 1.0383 | 0.5136 | 0.0018  | 0.0126 | 0.8907 | 7.1573  | 0.7862 | -264.5863 |
| log_f_Alcaligenaceae  | CardioEmbolicStroke | MR Egger                  | 10 | 1.2381 | 0.7200 | 2.1291 | 0.4622 | -0.1069 | 0.1295 | 0.4330 | 9.3553  | 0.3132 | -86.9833  |
| log_f_Alcaligenaceae  | CardioEmbolicStroke | Weighted median           | 10 | 0.9435 | 0.8326 | 1.0692 | 0.3619 | -0.1069 | 0.1295 | 0.4330 | 9.3553  | 0.3132 | -86.9833  |
| log_f_Alcaligenaceae  | CardioEmbolicStroke | Inverse variance weighted | 10 | 0.9891 | 0.8987 | 1.0886 | 0.8223 | -0.1069 | 0.1295 | 0.4330 | 9.3553  | 0.3132 | -86.9833  |
| log_f_Alcaligenaceae  | CardioEmbolicStroke | Simple mode               | 10 | 0.9533 | 0.7724 | 1.1766 | 0.6667 | -0.1069 | 0.1295 | 0.4330 | 9.3553  | 0.3132 | -86.9833  |
| log_f_Alcaligenaceae  | CardioEmbolicStroke | Weighted mode             | 10 | 0.9455 | 0.7809 | 1.1448 | 0.5796 | -0.1069 | 0.1295 | 0.4330 | 9.3553  | 0.3132 | -86.9833  |
| log_f_Alcaligenaceae  | IschemicStroke      | MR Egger                  | 12 | 0.9896 | 0.8883 | 1.1023 | 0.8526 | -0.0035 | 0.0265 | 0.8980 | 12.4054 | 0.2588 | -190.8561 |
| log_f_Alcaligenaceae  | IschemicStroke      | Weighted median           | 12 | 0.9842 | 0.9563 | 1.0130 | 0.2798 | -0.0035 | 0.0265 | 0.8980 | 12.4054 | 0.2588 | -190.8561 |
| log_f_Alcaligenaceae  | IschemicStroke      | Inverse variance weighted | 12 | 0.9826 | 0.9619 | 1.0036 | 0.1042 | -0.0035 | 0.0265 | 0.8980 | 12.4054 | 0.2588 | -190.8561 |
| log_f_Alcaligenaceae  | IschemicStroke      | Simple mode               | 12 | 0.9865 | 0.9390 | 1.0364 | 0.6011 | -0.0035 | 0.0265 | 0.8980 | 12.4054 | 0.2588 | -190.8561 |
| log_f_Alcaligenaceae  | IschemicStroke      | Weighted mode             | 12 | 0.9884 | 0.9435 | 1.0355 | 0.6335 | -0.0035 | 0.0265 | 0.8980 | 12.4054 | 0.2588 | -190.8561 |
| log_f_Alcaligenaceae  | LargeArteryStroke   | MR Egger                  | 12 | 1.0216 | 0.6757 | 1.5448 | 0.9212 | -0.0127 | 0.1016 | 0.9030 | 17.2611 | 0.0688 | -39.7558  |
| log_f_Alcaligenaceae  | LargeArteryStroke   | Weighted median           | 12 | 0.9885 | 0.8967 | 1.0896 | 0.8157 | -0.0127 | 0.1016 | 0.9030 | 17.2611 | 0.0688 | -39.7558  |
| log_f_Alcaligenaceae  | LargeArteryStroke   | Inverse variance weighted | 12 | 0.9956 | 0.9180 | 1.0797 | 0.9149 | -0.0127 | 0.1016 | 0.9030 | 17.2611 | 0.0688 | -39.7558  |
| log_f_Alcaligenaceae  | LargeArteryStroke   | Simple mode               | 12 | 1.1145 | 0.9110 | 1.3635 | 0.3145 | -0.0127 | 0.1016 | 0.9030 | 17.2611 | 0.0688 | -39.7558  |
| log_f_Alcaligenaceae  | LargeArteryStroke   | Weighted mode             | 12 | 0.9930 | 0.8336 | 1.1828 | 0.9385 | -0.0127 | 0.1016 | 0.9030 | 17.2611 | 0.0688 | -39.7558  |
| log_f_Alcaligenaceae  | SmallVesselStroke   | MR Egger                  | 12 | 0.9358 | 0.7855 | 1.1149 | 0.4748 | 0.0242  | 0.0429 | 0.5856 | 7.0228  | 0.7233 | -165.2864 |
| log_f_Alcaligenaceae  | SmallVesselStroke   | Weighted median           | 12 | 0.9840 | 0.9398 | 1.0303 | 0.4922 | 0.0242  | 0.0429 | 0.5856 | 7.0228  | 0.7233 | -165.2864 |
| log_f_Alcaligenaceae  | SmallVesselStroke   | Inverse variance weighted | 12 | 0.9831 | 0.9484 | 1.0190 | 0.3513 | 0.0242  | 0.0429 | 0.5856 | 7.0228  | 0.7233 | -165.2864 |
| log_f_Alcaligenaceae  | SmallVesselStroke   | Simple mode               | 12 | 0.9881 | 0.9189 | 1.0624 | 0.7514 | 0.0242  | 0.0429 | 0.5856 | 7.0228  | 0.7233 | -165.2864 |
| log_f_Alcaligenaceae  | SmallVesselStroke   | Weighted mode             | 12 | 0.9900 | 0.9202 | 1.0652 | 0.7936 | 0.0242  | 0.0429 | 0.5856 | 7.0228  | 0.7233 | -165.2864 |
| log_f_Alcaligenaceae  | Stroke              | MR Egger                  | 13 | 0.9986 | 0.9056 | 1.1012 | 0.9784 | -0.0027 | 0.0239 | 0.9108 | 17.9247 | 0.0833 | -172.6648 |
| log_f_Alcaligenaceae  | Stroke              | Weighted median           | 13 | 0.9881 | 0.9642 | 1.0126 | 0.3386 | -0.0027 | 0.0239 | 0.9108 | 17.9247 | 0.0833 | -172.6648 |
| log_f_Alcaligenaceae  | Stroke              | Inverse variance weighted | 13 | 0.9931 | 0.9734 | 1.0132 | 0.4957 | -0.0027 | 0.0239 | 0.9108 | 17.9247 | 0.0833 | -172.6648 |
| log_f_Alcaligenaceae  | Stroke              | Simple mode               | 13 | 0.9801 | 0.9408 | 1.0211 | 0.3553 | -0.0027 | 0.0239 | 0.9108 | 17.9247 | 0.0833 | -172.6648 |
| log_f_Alcaligenaceae  | Stroke              | Weighted mode             | 13 | 0.9816 | 0.9483 | 1.0161 | 0.3136 | -0.0027 | 0.0239 | 0.9108 | 17.9247 | 0.0833 | -172.6648 |
| log_f_Brachyspiraceae | CardioEmbolicStroke | MR Egger                  | 10 | 0.9956 | 0.6347 | 1.5619 | 0.9853 | -0.0075 | 0.1019 | 0.9435 | 3.4382  | 0.9039 | -160.6510 |
| log_f_Brachyspiraceae | CardioEmbolicStroke | Weighted median           | 10 | 0.9723 | 0.8665 | 1.0910 | 0.6326 | -0.0075 | 0.1019 | 0.9435 | 3.4382  | 0.9039 | -160.6510 |
| log_f_Brachyspiraceae | CardioEmbolicStroke | Inverse variance weighted | 10 | 0.9794 | 0.8965 | 1.0698 | 0.6435 | -0.0075 | 0.1019 | 0.9435 | 3.4382  | 0.9039 | -160.6510 |
| log_f_Brachyspiraceae | CardioEmbolicStroke | Simple mode               | 10 | 0.9848 | 0.8327 | 1.1647 | 0.8621 | -0.0075 | 0.1019 | 0.9435 | 3.4382  | 0.9039 | -160.6510 |

|                        |                     |                           |    |        |        |        |        |         |        |        |         |        |           |
|------------------------|---------------------|---------------------------|----|--------|--------|--------|--------|---------|--------|--------|---------|--------|-----------|
| log_f_Brachyspiraceae  | CardioEmbolicStroke | Weighted mode             | 10 | 1.0087 | 0.8547 | 1.1904 | 0.9208 | -0.0075 | 0.1019 | 0.9435 | 3.4382  | 0.9039 | -160.6510 |
| log_f_Brachyspiraceae  | IschemicStroke      | MR Egger                  | 12 | 0.9535 | 0.8663 | 1.0494 | 0.3531 | 0.0164  | 0.0217 | 0.4674 | 5.7781  | 0.8335 | -373.1357 |
| log_f_Brachyspiraceae  | IschemicStroke      | Weighted median           | 12 | 0.9868 | 0.9615 | 1.0127 | 0.3151 | 0.0164  | 0.0217 | 0.4674 | 5.7781  | 0.8335 | -373.1357 |
| log_f_Brachyspiraceae  | IschemicStroke      | Inverse variance weighted | 12 | 0.9886 | 0.9697 | 1.0079 | 0.2462 | 0.0164  | 0.0217 | 0.4674 | 5.7781  | 0.8335 | -373.1357 |
| log_f_Brachyspiraceae  | IschemicStroke      | Simple mode               | 12 | 0.9896 | 0.9502 | 1.0307 | 0.6238 | 0.0164  | 0.0217 | 0.4674 | 5.7781  | 0.8335 | -373.1357 |
| log_f_Brachyspiraceae  | IschemicStroke      | Weighted mode             | 12 | 0.9873 | 0.9470 | 1.0294 | 0.5609 | 0.0164  | 0.0217 | 0.4674 | 5.7781  | 0.8335 | -373.1357 |
| log_f_Brachyspiraceae  | LargeArteryStroke   | MR Egger                  | 11 | 1.1560 | 0.8433 | 1.5848 | 0.3911 | -0.1038 | 0.0725 | 0.1860 | 11.2367 | 0.3394 | -89.4021  |
| log_f_Brachyspiraceae  | LargeArteryStroke   | Weighted median           | 11 | 0.9639 | 0.8801 | 1.0556 | 0.4277 | -0.1038 | 0.0725 | 0.1860 | 11.2367 | 0.3394 | -89.4021  |
| log_f_Brachyspiraceae  | LargeArteryStroke   | Inverse variance weighted | 11 | 0.9227 | 0.8617 | 0.9880 | 0.0211 | -0.1038 | 0.0725 | 0.1860 | 11.2367 | 0.3394 | -89.4021  |
| log_f_Brachyspiraceae  | LargeArteryStroke   | Simple mode               | 11 | 0.9790 | 0.8510 | 1.1263 | 0.7730 | -0.1038 | 0.0725 | 0.1860 | 11.2367 | 0.3394 | -89.4021  |
| log_f_Brachyspiraceae  | LargeArteryStroke   | Weighted mode             | 11 | 0.9741 | 0.8477 | 1.1193 | 0.7191 | -0.1038 | 0.0725 | 0.1860 | 11.2367 | 0.3394 | -89.4021  |
| log_f_Brachyspiraceae  | SmallVesselStroke   | MR Egger                  | 11 | 1.0411 | 0.8738 | 1.2404 | 0.6632 | -0.0296 | 0.0402 | 0.4803 | 2.9070  | 0.9835 | -415.7696 |
| log_f_Brachyspiraceae  | SmallVesselStroke   | Weighted median           | 11 | 0.9863 | 0.9416 | 1.0332 | 0.5607 | -0.0296 | 0.0402 | 0.4803 | 2.9070  | 0.9835 | -415.7696 |
| log_f_Brachyspiraceae  | SmallVesselStroke   | Inverse variance weighted | 11 | 0.9761 | 0.9415 | 1.0121 | 0.1903 | -0.0296 | 0.0402 | 0.4803 | 2.9070  | 0.9835 | -415.7696 |
| log_f_Brachyspiraceae  | SmallVesselStroke   | Simple mode               | 11 | 0.9882 | 0.9198 | 1.0616 | 0.7519 | -0.0296 | 0.0402 | 0.4803 | 2.9070  | 0.9835 | -415.7696 |
| log_f_Brachyspiraceae  | SmallVesselStroke   | Weighted mode             | 11 | 0.9882 | 0.9226 | 1.0584 | 0.7415 | -0.0296 | 0.0402 | 0.4803 | 2.9070  | 0.9835 | -415.7696 |
| log_f_Brachyspiraceae  | Stroke              | MR Egger                  | 12 | 0.9988 | 0.9213 | 1.0828 | 0.9768 | -0.0044 | 0.0183 | 0.8146 | 9.9817  | 0.4421 | -422.4728 |
| log_f_Brachyspiraceae  | Stroke              | Weighted median           | 12 | 0.9891 | 0.9664 | 1.0124 | 0.3572 | -0.0044 | 0.0183 | 0.8146 | 9.9817  | 0.4421 | -422.4728 |
| log_f_Brachyspiraceae  | Stroke              | Inverse variance weighted | 12 | 0.9891 | 0.9730 | 1.0055 | 0.1928 | -0.0044 | 0.0183 | 0.8146 | 9.9817  | 0.4421 | -422.4728 |
| log_f_Brachyspiraceae  | Stroke              | Simple mode               | 12 | 0.9857 | 0.9501 | 1.0226 | 0.4581 | -0.0044 | 0.0183 | 0.8146 | 9.9817  | 0.4421 | -422.4728 |
| log_f_Brachyspiraceae  | Stroke              | Weighted mode             | 12 | 0.9871 | 0.9531 | 1.0223 | 0.4820 | -0.0044 | 0.0183 | 0.8146 | 9.9817  | 0.4421 | -422.4728 |
| log_f_Moraxellaceae    | CardioEmbolicStroke | MR Egger                  | 7  | 0.8793 | 0.6775 | 1.1412 | 0.3780 | 0.0386  | 0.0681 | 0.5958 | 2.9257  | 0.7114 | -155.6075 |
| log_f_Moraxellaceae    | CardioEmbolicStroke | Weighted median           | 7  | 0.9286 | 0.8257 | 1.0444 | 0.2168 | 0.0386  | 0.0681 | 0.5958 | 2.9257  | 0.7114 | -155.6075 |
| log_f_Moraxellaceae    | CardioEmbolicStroke | Inverse variance weighted | 7  | 0.9436 | 0.8611 | 1.0339 | 0.2130 | 0.0386  | 0.0681 | 0.5958 | 2.9257  | 0.7114 | -155.6075 |
| log_f_Moraxellaceae    | CardioEmbolicStroke | Simple mode               | 7  | 0.8962 | 0.7571 | 1.0608 | 0.2498 | 0.0386  | 0.0681 | 0.5958 | 2.9257  | 0.7114 | -155.6075 |
| log_f_Moraxellaceae    | CardioEmbolicStroke | Weighted mode             | 7  | 0.9116 | 0.7841 | 1.0598 | 0.2737 | 0.0386  | 0.0681 | 0.5958 | 2.9257  | 0.7114 | -155.6075 |
| log_f_Moraxellaceae    | IschemicStroke      | MR Egger                  | 9  | 0.9841 | 0.9332 | 1.0379 | 0.5742 | 0.0150  | 0.0146 | 0.3389 | 5.1346  | 0.7431 | -394.0664 |
| log_f_Moraxellaceae    | IschemicStroke      | Weighted median           | 9  | 1.0044 | 0.9792 | 1.0302 | 0.7372 | 0.0150  | 0.0146 | 0.3389 | 5.1346  | 0.7431 | -394.0664 |
| log_f_Moraxellaceae    | IschemicStroke      | Inverse variance weighted | 9  | 1.0100 | 0.9907 | 1.0297 | 0.3122 | 0.0150  | 0.0146 | 0.3389 | 5.1346  | 0.7431 | -394.0664 |
| log_f_Moraxellaceae    | IschemicStroke      | Simple mode               | 9  | 1.0166 | 0.9779 | 1.0568 | 0.4298 | 0.0150  | 0.0146 | 0.3389 | 5.1346  | 0.7431 | -394.0664 |
| log_f_Moraxellaceae    | IschemicStroke      | Weighted mode             | 9  | 0.9933 | 0.9624 | 1.0252 | 0.6878 | 0.0150  | 0.0146 | 0.3389 | 5.1346  | 0.7431 | -394.0664 |
| log_f_Moraxellaceae    | LargeArteryStroke   | MR Egger                  | 8  | 0.9635 | 0.8054 | 1.1526 | 0.6981 | 0.0151  | 0.0484 | 0.7661 | 5.9683  | 0.4267 | -60.4745  |
| log_f_Moraxellaceae    | LargeArteryStroke   | Weighted median           | 8  | 0.9776 | 0.8960 | 1.0666 | 0.6108 | 0.0151  | 0.0484 | 0.7661 | 5.9683  | 0.4267 | -60.4745  |
| log_f_Moraxellaceae    | LargeArteryStroke   | Inverse variance weighted | 8  | 0.9893 | 0.9266 | 1.0563 | 0.7484 | 0.0151  | 0.0484 | 0.7661 | 5.9683  | 0.4267 | -60.4745  |
| log_f_Moraxellaceae    | LargeArteryStroke   | Simple mode               | 8  | 0.9977 | 0.8818 | 1.1289 | 0.9722 | 0.0151  | 0.0484 | 0.7661 | 5.9683  | 0.4267 | -60.4745  |
| log_f_Moraxellaceae    | LargeArteryStroke   | Weighted mode             | 8  | 0.9769 | 0.8751 | 1.0905 | 0.6893 | 0.0151  | 0.0484 | 0.7661 | 5.9683  | 0.4267 | -60.4745  |
| log_f_Moraxellaceae    | SmallVesselStroke   | MR Egger                  | 8  | 0.9493 | 0.8526 | 1.0569 | 0.3788 | 0.0285  | 0.0290 | 0.3625 | 6.9588  | 0.3247 | -221.0221 |
| log_f_Moraxellaceae    | SmallVesselStroke   | Weighted median           | 8  | 0.9869 | 0.9382 | 1.0381 | 0.6088 | 0.0285  | 0.0290 | 0.3625 | 6.9588  | 0.3247 | -221.0221 |
| log_f_Moraxellaceae    | SmallVesselStroke   | Inverse variance weighted | 8  | 0.9982 | 0.9600 | 1.0379 | 0.9290 | 0.0285  | 0.0290 | 0.3625 | 6.9588  | 0.3247 | -221.0221 |
| log_f_Moraxellaceae    | SmallVesselStroke   | Simple mode               | 8  | 0.9703 | 0.9032 | 1.0423 | 0.4365 | 0.0285  | 0.0290 | 0.3625 | 6.9588  | 0.3247 | -221.0221 |
| log_f_Moraxellaceae    | SmallVesselStroke   | Weighted mode             | 8  | 0.9785 | 0.9201 | 1.0406 | 0.5110 | 0.0285  | 0.0290 | 0.3625 | 6.9588  | 0.3247 | -221.0221 |
| log_f_Moraxellaceae    | Stroke              | MR Egger                  | 9  | 1.0064 | 0.9606 | 1.0544 | 0.7960 | 0.0037  | 0.0128 | 0.7780 | 4.8401  | 0.6795 | -267.1979 |
| log_f_Moraxellaceae    | Stroke              | Weighted median           | 9  | 1.0106 | 0.9890 | 1.0326 | 0.3385 | 0.0037  | 0.0128 | 0.7780 | 4.8401  | 0.6795 | -267.1979 |
| log_f_Moraxellaceae    | Stroke              | Inverse variance weighted | 9  | 1.0130 | 0.9962 | 1.0300 | 0.1297 | 0.0037  | 0.0128 | 0.7780 | 4.8401  | 0.6795 | -267.1979 |
| log_f_Moraxellaceae    | Stroke              | Simple mode               | 9  | 1.0270 | 0.9892 | 1.0662 | 0.2011 | 0.0037  | 0.0128 | 0.7780 | 4.8401  | 0.6795 | -267.1979 |
| log_f_Moraxellaceae    | Stroke              | Weighted mode             | 9  | 1.0022 | 0.9714 | 1.0339 | 0.8955 | 0.0037  | 0.0128 | 0.7780 | 4.8401  | 0.6795 | -267.1979 |
| log_f_Paenibacillaceae | CardioEmbolicStroke | MR Egger                  | 8  | 1.2899 | 0.5845 | 2.8467 | 0.5517 | -0.0868 | 0.1610 | 0.6090 | 9.3532  | 0.1547 | -616.7388 |
| log_f_Paenibacillaceae | CardioEmbolicStroke | Weighted median           | 8  | 1.0064 | 0.8780 | 1.1535 | 0.9271 | -0.0868 | 0.1610 | 0.6090 | 9.3532  | 0.1547 | -616.7388 |
| log_f_Paenibacillaceae | CardioEmbolicStroke | Inverse variance weighted | 8  | 1.0403 | 0.9231 | 1.1723 | 0.5172 | -0.0868 | 0.1610 | 0.6090 | 9.3532  | 0.1547 | -616.7388 |
| log_f_Paenibacillaceae | CardioEmbolicStroke | Simple mode               | 8  | 0.9981 | 0.8078 | 1.2333 | 0.9867 | -0.0868 | 0.1610 | 0.6090 | 9.3532  | 0.1547 | -616.7388 |
| log_f_Paenibacillaceae | CardioEmbolicStroke | Weighted mode             | 8  | 0.9931 | 0.8222 | 1.1995 | 0.9445 | -0.0868 | 0.1610 | 0.6090 | 9.3532  | 0.1547 | -616.7388 |
| log_f_Paenibacillaceae | IschemicStroke      | MR Egger                  | 10 | 1.0305 | 0.9408 | 1.1289 | 0.5360 | -0.0114 | 0.0197 | 0.5778 | 6.5378  | 0.5872 | -541.3580 |
| log_f_Paenibacillaceae | IschemicStroke      | Weighted median           | 10 | 0.9915 | 0.9647 | 1.0191 | 0.5438 | -0.0114 | 0.0197 | 0.5778 | 6.5378  | 0.5872 | -541.3580 |

|                        |                     |                           |    |        |        |        |        |         |        |        |         |        |           |
|------------------------|---------------------|---------------------------|----|--------|--------|--------|--------|---------|--------|--------|---------|--------|-----------|
| log_f_Paenibacillaceae | IschemicStroke      | Inverse variance weighted | 10 | 1.0039 | 0.9827 | 1.0255 | 0.7238 | -0.0114 | 0.0197 | 0.5778 | 6.5378  | 0.5872 | -541.3580 |
| log_f_Paenibacillaceae | IschemicStroke      | Simple mode               | 10 | 0.9909 | 0.9472 | 1.0365 | 0.6993 | -0.0114 | 0.0197 | 0.5778 | 6.5378  | 0.5872 | -541.3580 |
| log_f_Paenibacillaceae | IschemicStroke      | Weighted mode             | 10 | 0.9892 | 0.9507 | 1.0294 | 0.6074 | -0.0114 | 0.0197 | 0.5778 | 6.5378  | 0.5872 | -541.3580 |
| log_f_Paenibacillaceae | LargeArteryStroke   | MR Egger                  | 10 | 1.1818 | 0.7449 | 1.8747 | 0.4983 | -0.0720 | 0.0994 | 0.4894 | 18.6376 | 0.0169 | -50.2004  |
| log_f_Paenibacillaceae | LargeArteryStroke   | Weighted median           | 10 | 0.9569 | 0.8566 | 1.0689 | 0.4350 | -0.0720 | 0.0994 | 0.4894 | 18.6376 | 0.0169 | -50.2004  |
| log_f_Paenibacillaceae | LargeArteryStroke   | Inverse variance weighted | 10 | 1.0010 | 0.9030 | 1.1096 | 0.9850 | -0.0720 | 0.0994 | 0.4894 | 18.6376 | 0.0169 | -50.2004  |
| log_f_Paenibacillaceae | LargeArteryStroke   | Simple mode               | 10 | 0.9234 | 0.7474 | 1.1407 | 0.4786 | -0.0720 | 0.0994 | 0.4894 | 18.6376 | 0.0169 | -50.2004  |
| log_f_Paenibacillaceae | LargeArteryStroke   | Weighted mode             | 10 | 0.9053 | 0.7669 | 1.0687 | 0.2702 | -0.0720 | 0.0994 | 0.4894 | 18.6376 | 0.0169 | -50.2004  |
| log_f_Paenibacillaceae | SmallVesselStroke   | MR Egger                  | 10 | 0.9942 | 0.8188 | 1.2073 | 0.9547 | -0.0057 | 0.0421 | 0.8964 | 11.3769 | 0.1812 | -210.9699 |
| log_f_Paenibacillaceae | SmallVesselStroke   | Weighted median           | 10 | 0.9982 | 0.9473 | 1.0518 | 0.9461 | -0.0057 | 0.0421 | 0.8964 | 11.3769 | 0.1812 | -210.9699 |
| log_f_Paenibacillaceae | SmallVesselStroke   | Inverse variance weighted | 10 | 0.9814 | 0.9401 | 1.0246 | 0.3931 | -0.0057 | 0.0421 | 0.8964 | 11.3769 | 0.1812 | -210.9699 |
| log_f_Paenibacillaceae | SmallVesselStroke   | Simple mode               | 10 | 0.9953 | 0.9222 | 1.0742 | 0.9065 | -0.0057 | 0.0421 | 0.8964 | 11.3769 | 0.1812 | -210.9699 |
| log_f_Paenibacillaceae | SmallVesselStroke   | Weighted mode             | 10 | 1.0003 | 0.9327 | 1.0728 | 0.9931 | -0.0057 | 0.0421 | 0.8964 | 11.3769 | 0.1812 | -210.9699 |
| log_f_Paenibacillaceae | Stroke              | MR Egger                  | 11 | 1.0590 | 0.9843 | 1.1392 | 0.1588 | -0.0214 | 0.0160 | 0.2146 | 10.9943 | 0.3580 | -333.1058 |
| log_f_Paenibacillaceae | Stroke              | Weighted median           | 11 | 1.0004 | 0.9769 | 1.0245 | 0.9722 | -0.0214 | 0.0160 | 0.2146 | 10.9943 | 0.3580 | -333.1058 |
| log_f_Paenibacillaceae | Stroke              | Inverse variance weighted | 11 | 1.0090 | 0.9907 | 1.0277 | 0.3377 | -0.0214 | 0.0160 | 0.2146 | 10.9943 | 0.3580 | -333.1058 |
| log_f_Paenibacillaceae | Stroke              | Simple mode               | 11 | 0.9954 | 0.9594 | 1.0327 | 0.8095 | -0.0214 | 0.0160 | 0.2146 | 10.9943 | 0.3580 | -333.1058 |
| log_f_Paenibacillaceae | Stroke              | Weighted mode             | 11 | 0.9954 | 0.9629 | 1.0289 | 0.7890 | -0.0214 | 0.0160 | 0.2146 | 10.9943 | 0.3580 | -333.1058 |
| log_f_Peptococcaceae   | CardioEmbolicStroke | MR Egger                  | 9  | 0.7480 | 0.4133 | 1.3537 | 0.3693 | 0.1192  | 0.1267 | 0.3782 | 5.1553  | 0.7409 | -472.8346 |
| log_f_Peptococcaceae   | CardioEmbolicStroke | Weighted median           | 9  | 1.0141 | 0.9057 | 1.1353 | 0.8087 | 0.1192  | 0.1267 | 0.3782 | 5.1553  | 0.7409 | -472.8346 |
| log_f_Peptococcaceae   | CardioEmbolicStroke | Inverse variance weighted | 9  | 0.9912 | 0.9068 | 1.0834 | 0.8454 | 0.1192  | 0.1267 | 0.3782 | 5.1553  | 0.7409 | -472.8346 |
| log_f_Peptococcaceae   | CardioEmbolicStroke | Simple mode               | 9  | 1.0130 | 0.8512 | 1.2056 | 0.8879 | 0.1192  | 0.1267 | 0.3782 | 5.1553  | 0.7409 | -472.8346 |
| log_f_Peptococcaceae   | CardioEmbolicStroke | Weighted mode             | 9  | 1.0092 | 0.8517 | 1.1958 | 0.9187 | 0.1192  | 0.1267 | 0.3782 | 5.1553  | 0.7409 | -472.8346 |
| log_f_Peptococcaceae   | IschemicStroke      | MR Egger                  | 12 | 1.0073 | 0.9423 | 1.0767 | 0.8356 | -0.0005 | 0.0153 | 0.9741 | 7.6846  | 0.6596 | -165.7283 |
| log_f_Peptococcaceae   | IschemicStroke      | Weighted median           | 12 | 0.9999 | 0.9758 | 1.0246 | 0.9950 | -0.0005 | 0.0153 | 0.9741 | 7.6846  | 0.6596 | -165.7283 |
| log_f_Peptococcaceae   | IschemicStroke      | Inverse variance weighted | 12 | 1.0062 | 0.9875 | 1.0252 | 0.5192 | -0.0005 | 0.0153 | 0.9741 | 7.6846  | 0.6596 | -165.7283 |
| log_f_Peptococcaceae   | IschemicStroke      | Simple mode               | 12 | 0.9960 | 0.9563 | 1.0373 | 0.8486 | -0.0005 | 0.0153 | 0.9741 | 7.6846  | 0.6596 | -165.7283 |
| log_f_Peptococcaceae   | IschemicStroke      | Weighted mode             | 12 | 0.9967 | 0.9611 | 1.0336 | 0.8605 | -0.0005 | 0.0153 | 0.9741 | 7.6846  | 0.6596 | -165.7283 |
| log_f_Peptococcaceae   | LargeArteryStroke   | MR Egger                  | 10 | 1.0518 | 0.7281 | 1.5195 | 0.7946 | -0.0236 | 0.0797 | 0.7747 | 5.0715  | 0.7499 | -213.5888 |
| log_f_Peptococcaceae   | LargeArteryStroke   | Weighted median           | 10 | 0.9669 | 0.8861 | 1.0550 | 0.4489 | -0.0236 | 0.0797 | 0.7747 | 5.0715  | 0.7499 | -213.5888 |
| log_f_Peptococcaceae   | LargeArteryStroke   | Inverse variance weighted | 10 | 0.9958 | 0.9333 | 1.0626 | 0.8994 | -0.0236 | 0.0797 | 0.7747 | 5.0715  | 0.7499 | -213.5888 |
| log_f_Peptococcaceae   | LargeArteryStroke   | Simple mode               | 10 | 0.9412 | 0.8193 | 1.0813 | 0.4145 | -0.0236 | 0.0797 | 0.7747 | 5.0715  | 0.7499 | -213.5888 |
| log_f_Peptococcaceae   | LargeArteryStroke   | Weighted mode             | 10 | 0.9377 | 0.8182 | 1.0747 | 0.3794 | -0.0236 | 0.0797 | 0.7747 | 5.0715  | 0.7499 | -213.5888 |
| log_f_Peptococcaceae   | SmallVesselStroke   | MR Egger                  | 10 | 0.9363 | 0.7612 | 1.1517 | 0.5506 | 0.0387  | 0.0448 | 0.4129 | 4.2836  | 0.8918 | -465.3643 |
| log_f_Peptococcaceae   | SmallVesselStroke   | Weighted median           | 10 | 1.0259 | 0.9778 | 1.0764 | 0.2972 | 0.0387  | 0.0448 | 0.4129 | 4.2836  | 0.8918 | -465.3643 |
| log_f_Peptococcaceae   | SmallVesselStroke   | Inverse variance weighted | 10 | 1.0243 | 0.9879 | 1.0621 | 0.1939 | 0.0387  | 0.0448 | 0.4129 | 4.2836  | 0.8918 | -465.3643 |
| log_f_Peptococcaceae   | SmallVesselStroke   | Simple mode               | 10 | 1.0335 | 0.9572 | 1.1158 | 0.4215 | 0.0387  | 0.0448 | 0.4129 | 4.2836  | 0.8918 | -465.3643 |
| log_f_Peptococcaceae   | SmallVesselStroke   | Weighted mode             | 10 | 1.0273 | 0.9540 | 1.1063 | 0.4942 | 0.0387  | 0.0448 | 0.4129 | 4.2836  | 0.8918 | -465.3643 |
| log_f_Peptococcaceae   | Stroke              | MR Egger                  | 12 | 0.9801 | 0.9284 | 1.0347 | 0.4846 | 0.0069  | 0.0126 | 0.5959 | 4.0485  | 0.9451 | -362.1943 |
| log_f_Peptococcaceae   | Stroke              | Weighted median           | 12 | 0.9943 | 0.9747 | 1.0144 | 0.5765 | 0.0069  | 0.0126 | 0.5959 | 4.0485  | 0.9451 | -362.1943 |
| log_f_Peptococcaceae   | Stroke              | Inverse variance weighted | 12 | 0.9944 | 0.9787 | 1.0103 | 0.4900 | 0.0069  | 0.0126 | 0.5959 | 4.0485  | 0.9451 | -362.1943 |
| log_f_Peptococcaceae   | Stroke              | Simple mode               | 12 | 0.9937 | 0.9622 | 1.0261 | 0.7058 | 0.0069  | 0.0126 | 0.5959 | 4.0485  | 0.9451 | -362.1943 |
| log_f_Peptococcaceae   | Stroke              | Weighted mode             | 12 | 0.9945 | 0.9649 | 1.0250 | 0.7266 | 0.0069  | 0.0126 | 0.5959 | 4.0485  | 0.9451 | -362.1943 |
| log_f_Pseudomonadaceae | CardioEmbolicStroke | MR Egger                  | 8  | 1.2887 | 0.8785 | 2.1089 | 0.3518 | -0.1307 | 0.1193 | 0.3152 | 3.5351  | 0.8315 | -252.8059 |
| log_f_Pseudomonadaceae | CardioEmbolicStroke | Weighted median           | 8  | 0.9930 | 0.8793 | 1.1214 | 0.9099 | -0.1307 | 0.1193 | 0.3152 | 3.5351  | 0.8315 | -252.8059 |
| log_f_Pseudomonadaceae | CardioEmbolicStroke | Inverse variance weighted | 8  | 0.9840 | 0.8909 | 1.0869 | 0.7511 | -0.1307 | 0.1193 | 0.3152 | 3.5351  | 0.8315 | -252.8059 |
| log_f_Pseudomonadaceae | CardioEmbolicStroke | Simple mode               | 8  | 1.0257 | 0.8594 | 1.2243 | 0.7865 | -0.1307 | 0.1193 | 0.3152 | 3.5351  | 0.8315 | -252.8059 |
| log_f_Pseudomonadaceae | CardioEmbolicStroke | Weighted mode             | 8  | 1.0257 | 0.8509 | 1.2365 | 0.7975 | -0.1307 | 0.1193 | 0.3152 | 3.5351  | 0.8315 | -252.8059 |
| log_f_Pseudomonadaceae | IschemicStroke      | MR Egger                  | 10 | 0.9833 | 0.9158 | 1.0558 | 0.6552 | 0.0073  | 0.0187 | 0.7054 | 5.1477  | 0.7417 | -188.7741 |
| log_f_Pseudomonadaceae | IschemicStroke      | Weighted median           | 10 | 0.9978 | 0.9710 | 1.0253 | 0.8725 | 0.0073  | 0.0187 | 0.7054 | 5.1477  | 0.7417 | -188.7741 |
| log_f_Pseudomonadaceae | IschemicStroke      | Inverse variance weighted | 10 | 0.9968 | 0.9766 | 1.0174 | 0.7583 | 0.0073  | 0.0187 | 0.7054 | 5.1477  | 0.7417 | -188.7741 |
| log_f_Pseudomonadaceae | IschemicStroke      | Simple mode               | 10 | 0.9942 | 0.9539 | 1.0363 | 0.7903 | 0.0073  | 0.0187 | 0.7054 | 5.1477  | 0.7417 | -188.7741 |
| log_f_Pseudomonadaceae | IschemicStroke      | Weighted mode             | 10 | 0.9925 | 0.9521 | 1.0347 | 0.7318 | 0.0073  | 0.0187 | 0.7054 | 5.1477  | 0.7417 | -188.7741 |

|                           |                     |                           |    |        |        |        |        |         |        |        |         |        |            |
|---------------------------|---------------------|---------------------------|----|--------|--------|--------|--------|---------|--------|--------|---------|--------|------------|
| log_f_Pseudomonadaceae    | LargeArteryStroke   | MR Egger                  | 9  | 0.8642 | 0.6588 | 1.1336 | 0.3268 | 0.0832  | 0.0693 | 0.2689 | 4.2793  | 0.8311 | -192.4063  |
| log_f_Pseudomonadaceae    | LargeArteryStroke   | Weighted median           | 9  | 1.0123 | 0.9209 | 1.1128 | 0.8005 | 0.0832  | 0.0693 | 0.2689 | 4.2793  | 0.8311 | -192.4063  |
| log_f_Pseudomonadaceae    | LargeArteryStroke   | Inverse variance weighted | 9  | 1.0150 | 0.9476 | 1.0872 | 0.6714 | 0.0832  | 0.0693 | 0.2689 | 4.2793  | 0.8311 | -192.4063  |
| log_f_Pseudomonadaceae    | LargeArteryStroke   | Simple mode               | 9  | 1.0128 | 0.8820 | 1.1630 | 0.8616 | 0.0832  | 0.0693 | 0.2689 | 4.2793  | 0.8311 | -192.4063  |
| log_f_Pseudomonadaceae    | LargeArteryStroke   | Weighted mode             | 9  | 1.0090 | 0.8916 | 1.1418 | 0.8909 | 0.0832  | 0.0693 | 0.2689 | 4.2793  | 0.8311 | -192.4063  |
| log_f_Pseudomonadaceae    | SmallVesselStroke   | MR Egger                  | 9  | 0.9991 | 0.8615 | 1.1587 | 0.9910 | -0.0137 | 0.0380 | 0.7292 | 2.3178  | 0.9402 | -368.4576  |
| log_f_Pseudomonadaceae    | SmallVesselStroke   | Weighted median           | 9  | 0.9705 | 0.9247 | 1.0186 | 0.2249 | -0.0137 | 0.0380 | 0.7292 | 2.3178  | 0.9402 | -368.4576  |
| log_f_Pseudomonadaceae    | SmallVesselStroke   | Inverse variance weighted | 9  | 0.9731 | 0.9369 | 1.0108 | 0.1596 | -0.0137 | 0.0380 | 0.7292 | 2.3178  | 0.9402 | -368.4576  |
| log_f_Pseudomonadaceae    | SmallVesselStroke   | Simple mode               | 9  | 0.9818 | 0.9132 | 1.0555 | 0.6321 | -0.0137 | 0.0380 | 0.7292 | 2.3178  | 0.9402 | -368.4576  |
| log_f_Pseudomonadaceae    | SmallVesselStroke   | Weighted mode             | 9  | 0.9794 | 0.9137 | 1.0499 | 0.5733 | -0.0137 | 0.0380 | 0.7292 | 2.3178  | 0.9402 | -368.4576  |
| log_f_Pseudomonadaceae    | Stroke              | MR Egger                  | 10 | 0.9993 | 0.9396 | 1.0628 | 0.9823 | -0.0004 | 0.0161 | 0.9819 | 6.8358  | 0.5545 | -170.7393  |
| log_f_Pseudomonadaceae    | Stroke              | Weighted median           | 10 | 0.9968 | 0.9737 | 1.0204 | 0.7871 | -0.0004 | 0.0161 | 0.9819 | 6.8358  | 0.5545 | -170.7393  |
| log_f_Pseudomonadaceae    | Stroke              | Inverse variance weighted | 10 | 0.9986 | 0.9811 | 1.0163 | 0.8738 | -0.0004 | 0.0161 | 0.9819 | 6.8358  | 0.5545 | -170.7393  |
| log_f_Pseudomonadaceae    | Stroke              | Simple mode               | 10 | 0.9975 | 0.9616 | 1.0347 | 0.8944 | -0.0004 | 0.0161 | 0.9819 | 6.8358  | 0.5545 | -170.7393  |
| log_f_Pseudomonadaceae    | Stroke              | Weighted mode             | 10 | 0.9967 | 0.9625 | 1.0321 | 0.8561 | -0.0004 | 0.0161 | 0.9819 | 6.8358  | 0.5545 | -170.7393  |
| log_f_Rhodocyceae         | CardioEmbolicStroke | MR Egger                  | 6  | 0.9852 | 0.6229 | 1.5581 | 0.9522 | 0.0254  | 0.1024 | 0.8161 | 3.7821  | 0.4363 | -1207.3920 |
| log_f_Rhodocyceae         | CardioEmbolicStroke | Weighted median           | 6  | 1.0246 | 0.8925 | 1.1764 | 0.7297 | 0.0254  | 0.1024 | 0.8161 | 3.7821  | 0.4363 | -1207.3920 |
| log_f_Rhodocyceae         | CardioEmbolicStroke | Inverse variance weighted | 6  | 1.0424 | 0.9353 | 1.1617 | 0.4527 | 0.0254  | 0.1024 | 0.8161 | 3.7821  | 0.4363 | -1207.3920 |
| log_f_Rhodocyceae         | CardioEmbolicStroke | Simple mode               | 6  | 0.9739 | 0.7979 | 1.1889 | 0.8056 | 0.0254  | 0.1024 | 0.8161 | 3.7821  | 0.4363 | -1207.3920 |
| log_f_Rhodocyceae         | CardioEmbolicStroke | Weighted mode             | 6  | 0.9871 | 0.8169 | 1.1926 | 0.8979 | 0.0254  | 0.1024 | 0.8161 | 3.7821  | 0.4363 | -1207.3920 |
| log_f_Rhodocyceae         | IschemicStroke      | MR Egger                  | 7  | 1.0560 | 0.9554 | 1.1671 | 0.3349 | -0.0181 | 0.0236 | 0.4764 | 7.7989  | 0.1677 | -565.7390  |
| log_f_Rhodocyceae         | IschemicStroke      | Weighted median           | 7  | 1.0051 | 0.9732 | 1.0381 | 0.7573 | -0.0181 | 0.0236 | 0.4764 | 7.7989  | 0.1677 | -565.7390  |
| log_f_Rhodocyceae         | IschemicStroke      | Inverse variance weighted | 7  | 1.0171 | 0.9885 | 1.0464 | 0.2437 | -0.0181 | 0.0236 | 0.4764 | 7.7989  | 0.1677 | -565.7390  |
| log_f_Rhodocyceae         | IschemicStroke      | Simple mode               | 7  | 0.9931 | 0.9414 | 1.0477 | 0.8091 | -0.0181 | 0.0236 | 0.4764 | 7.7989  | 0.1677 | -565.7390  |
| log_f_Rhodocyceae         | IschemicStroke      | Weighted mode             | 7  | 0.9949 | 0.9444 | 1.0481 | 0.8539 | -0.0181 | 0.0236 | 0.4764 | 7.7989  | 0.1677 | -565.7390  |
| log_f_Rhodocyceae         | LargeArteryStroke   | MR Egger                  | 7  | 0.8860 | 0.6681 | 1.1748 | 0.4387 | 0.0606  | 0.0663 | 0.4023 | 5.8667  | 0.3194 | -85.3142   |
| log_f_Rhodocyceae         | LargeArteryStroke   | Weighted median           | 7  | 1.0550 | 0.9530 | 1.1680 | 0.3020 | 0.0606  | 0.0663 | 0.4023 | 5.8667  | 0.3194 | -85.3142   |
| log_f_Rhodocyceae         | LargeArteryStroke   | Inverse variance weighted | 7  | 1.0048 | 0.9258 | 1.0906 | 0.9089 | 0.0606  | 0.0663 | 0.4023 | 5.8667  | 0.3194 | -85.3142   |
| log_f_Rhodocyceae         | LargeArteryStroke   | Simple mode               | 7  | 1.0639 | 0.9186 | 1.2322 | 0.4400 | 0.0606  | 0.0663 | 0.4023 | 5.8667  | 0.3194 | -85.3142   |
| log_f_Rhodocyceae         | LargeArteryStroke   | Weighted mode             | 7  | 1.0639 | 0.9316 | 1.2150 | 0.3958 | 0.0606  | 0.0663 | 0.4023 | 5.8667  | 0.3194 | -85.3142   |
| log_f_Rhodocyceae         | SmallVesselStroke   | MR Egger                  | 7  | 0.9889 | 0.8551 | 1.1436 | 0.8861 | 0.0032  | 0.0341 | 0.9287 | 3.6460  | 0.6014 | -401.6370  |
| log_f_Rhodocyceae         | SmallVesselStroke   | Weighted median           | 7  | 1.0066 | 0.9525 | 1.0637 | 0.8166 | 0.0032  | 0.0341 | 0.9287 | 3.6460  | 0.6014 | -401.6370  |
| log_f_Rhodocyceae         | SmallVesselStroke   | Inverse variance weighted | 7  | 0.9955 | 0.9539 | 1.0389 | 0.8361 | 0.0032  | 0.0341 | 0.9287 | 3.6460  | 0.6014 | -401.6370  |
| log_f_Rhodocyceae         | SmallVesselStroke   | Simple mode               | 7  | 1.0111 | 0.9307 | 1.0984 | 0.8031 | 0.0032  | 0.0341 | 0.9287 | 3.6460  | 0.6014 | -401.6370  |
| log_f_Rhodocyceae         | SmallVesselStroke   | Weighted mode             | 7  | 1.0121 | 0.9345 | 1.0961 | 0.7780 | 0.0032  | 0.0341 | 0.9287 | 3.6460  | 0.6014 | -401.6370  |
| log_f_Rhodocyceae         | Stroke              | MR Egger                  | 7  | 1.0315 | 0.9454 | 1.1255 | 0.5163 | -0.0090 | 0.0207 | 0.6806 | 8.6327  | 0.1246 | -697.9670  |
| log_f_Rhodocyceae         | Stroke              | Weighted median           | 7  | 1.0120 | 0.9832 | 1.0416 | 0.4181 | -0.0090 | 0.0207 | 0.6806 | 8.6327  | 0.1246 | -697.9670  |
| log_f_Rhodocyceae         | Stroke              | Inverse variance weighted | 7  | 1.0126 | 0.9879 | 1.0380 | 0.3198 | -0.0090 | 0.0207 | 0.6806 | 8.6327  | 0.1246 | -697.9670  |
| log_f_Rhodocyceae         | Stroke              | Simple mode               | 7  | 1.0108 | 0.9655 | 1.0583 | 0.6622 | -0.0090 | 0.0207 | 0.6806 | 8.6327  | 0.1246 | -697.9670  |
| log_f_Rhodocyceae         | Stroke              | Weighted mode             | 7  | 1.0148 | 0.9706 | 1.0610 | 0.5417 | -0.0090 | 0.0207 | 0.6806 | 8.6327  | 0.1246 | -697.9670  |
| log_f_Succinivibrionaceae | CardioEmbolicStroke | MR Egger                  | 10 | 1.2171 | 0.7675 | 1.9300 | 0.4278 | -0.0620 | 0.0999 | 0.5519 | 8.5779  | 0.3791 | -122.7557  |
| log_f_Succinivibrionaceae | CardioEmbolicStroke | Weighted median           | 10 | 1.0193 | 0.9059 | 1.1469 | 0.7505 | -0.0620 | 0.0999 | 0.5519 | 8.5779  | 0.3791 | -122.7557  |
| log_f_Succinivibrionaceae | CardioEmbolicStroke | Inverse variance weighted | 10 | 1.0547 | 0.9665 | 1.1509 | 0.2321 | -0.0620 | 0.0999 | 0.5519 | 8.5779  | 0.3791 | -122.7557  |
| log_f_Succinivibrionaceae | CardioEmbolicStroke | Simple mode               | 10 | 1.0178 | 0.8350 | 1.2405 | 0.8655 | -0.0620 | 0.0999 | 0.5519 | 8.5779  | 0.3791 | -122.7557  |
| log_f_Succinivibrionaceae | CardioEmbolicStroke | Weighted mode             | 10 | 1.0103 | 0.8521 | 1.1978 | 0.9089 | -0.0620 | 0.0999 | 0.5519 | 8.5779  | 0.3791 | -122.7557  |
| log_f_Succinivibrionaceae | IschemicStroke      | MR Egger                  | 10 | 0.9198 | 0.8303 | 1.0190 | 0.1484 | 0.0378  | 0.0222 | 0.1266 | 9.2308  | 0.4162 | -1007.9886 |
| log_f_Succinivibrionaceae | IschemicStroke      | Weighted median           | 10 | 1.0133 | 0.9855 | 1.0417 | 0.3521 | 0.0378  | 0.0222 | 0.1266 | 9.2308  | 0.4162 | -1007.9886 |
| log_f_Succinivibrionaceae | IschemicStroke      | Inverse variance weighted | 10 | 1.0038 | 0.9836 | 1.0244 | 0.7137 | 0.0378  | 0.0222 | 0.1266 | 9.2308  | 0.4162 | -1007.9886 |
| log_f_Succinivibrionaceae | IschemicStroke      | Simple mode               | 10 | 1.0191 | 0.9769 | 1.0632 | 0.4037 | 0.0378  | 0.0222 | 0.1266 | 9.2308  | 0.4162 | -1007.9886 |
| log_f_Succinivibrionaceae | IschemicStroke      | Weighted mode             | 10 | 1.0177 | 0.9708 | 1.0669 | 0.4841 | 0.0378  | 0.0222 | 0.1266 | 9.2308  | 0.4162 | -1007.9886 |
| log_f_Succinivibrionaceae | LargeArteryStroke   | MR Egger                  | 10 | 0.7992 | 0.5099 | 1.2526 | 0.3569 | 0.1033  | 0.0977 | 0.3212 | 17.1597 | 0.0463 | -155.2266  |
| log_f_Succinivibrionaceae | LargeArteryStroke   | Weighted median           | 10 | 1.0765 | 0.9811 | 1.1813 | 0.1195 | 0.1033  | 0.0977 | 0.3212 | 17.1597 | 0.0463 | -155.2266  |
| log_f_Succinivibrionaceae | LargeArteryStroke   | Inverse variance weighted | 10 | 1.0136 | 0.9269 | 1.1083 | 0.7674 | 0.1033  | 0.0977 | 0.3212 | 17.1597 | 0.0463 | -155.2266  |

|                               |                     |                           |    |        |        |        |        |         |        |        |         |        |            |
|-------------------------------|---------------------|---------------------------|----|--------|--------|--------|--------|---------|--------|--------|---------|--------|------------|
| log_f_Succinivibrionaceae     | LargeArteryStroke   | Simple mode               | 10 | 1.1346 | 0.9777 | 1.3167 | 0.1307 | 0.1033  | 0.0977 | 0.3212 | 17.1597 | 0.0463 | -155.2266  |
| log_f_Succinivibrionaceae     | LargeArteryStroke   | Weighted mode             | 10 | 1.1316 | 0.9602 | 1.3335 | 0.1742 | 0.1033  | 0.0977 | 0.3212 | 17.1597 | 0.0463 | -155.2266  |
| log_f_Succinivibrionaceae     | SmallVesselStroke   | MR Egger                  | 10 | 0.8663 | 0.7200 | 1.0425 | 0.1671 | 0.0618  | 0.0400 | 0.1614 | 9.6432  | 0.3801 | -544.0120  |
| log_f_Succinivibrionaceae     | SmallVesselStroke   | Weighted median           | 10 | 0.9876 | 0.9396 | 1.0381 | 0.6248 | 0.0618  | 0.0400 | 0.1614 | 9.6432  | 0.3801 | -544.0120  |
| log_f_Succinivibrionaceae     | SmallVesselStroke   | Inverse variance weighted | 10 | 0.9994 | 0.9626 | 1.0376 | 0.9751 | 0.0618  | 0.0400 | 0.1614 | 9.6432  | 0.3801 | -544.0120  |
| log_f_Succinivibrionaceae     | SmallVesselStroke   | Simple mode               | 10 | 0.9820 | 0.8971 | 1.0749 | 0.7027 | 0.0618  | 0.0400 | 0.1614 | 9.6432  | 0.3801 | -544.0120  |
| log_f_Succinivibrionaceae     | SmallVesselStroke   | Weighted mode             | 10 | 0.9743 | 0.9006 | 1.0539 | 0.5319 | 0.0618  | 0.0400 | 0.1614 | 9.6432  | 0.3801 | -544.0120  |
| log_f_Succinivibrionaceae     | Stroke              | MR Egger                  | 10 | 0.9422 | 0.8624 | 1.0293 | 0.2234 | 0.0262  | 0.0191 | 0.2081 | 8.0350  | 0.5306 | -1504.0691 |
| log_f_Succinivibrionaceae     | Stroke              | Weighted median           | 10 | 0.9998 | 0.9769 | 1.0232 | 0.9861 | 0.0262  | 0.0191 | 0.2081 | 8.0350  | 0.5306 | -1504.0691 |
| log_f_Succinivibrionaceae     | Stroke              | Inverse variance weighted | 10 | 1.0011 | 0.9841 | 1.0183 | 0.9039 | 0.0262  | 0.0191 | 0.2081 | 8.0350  | 0.5306 | -1504.0691 |
| log_f_Succinivibrionaceae     | Stroke              | Simple mode               | 10 | 1.0219 | 0.9780 | 1.0677 | 0.3587 | 0.0262  | 0.0191 | 0.2081 | 8.0350  | 0.5306 | -1504.0691 |
| log_f_Succinivibrionaceae     | Stroke              | Weighted mode             | 10 | 1.0213 | 0.9772 | 1.0673 | 0.3744 | 0.0262  | 0.0191 | 0.2081 | 8.0350  | 0.5306 | -1504.0691 |
| log_f_Thermoanaerobacteraceae | CardioEmbolicStroke | MR Egger                  | 6  | 1.2132 | 0.8202 | 1.7945 | 0.3880 | -0.1250 | 0.0958 | 0.2619 | 2.2992  | 0.8064 | -326.5572  |
| log_f_Thermoanaerobacteraceae | CardioEmbolicStroke | Weighted median           | 6  | 0.9694 | 0.8491 | 1.1068 | 0.6461 | -0.1250 | 0.0958 | 0.2619 | 2.2992  | 0.8064 | -326.5572  |
| log_f_Thermoanaerobacteraceae | CardioEmbolicStroke | Inverse variance weighted | 6  | 0.9438 | 0.8497 | 1.0484 | 0.2811 | -0.1250 | 0.0958 | 0.2619 | 2.2992  | 0.8064 | -326.5572  |
| log_f_Thermoanaerobacteraceae | CardioEmbolicStroke | Simple mode               | 6  | 0.9832 | 0.8085 | 1.1957 | 0.8721 | -0.1250 | 0.0958 | 0.2619 | 2.2992  | 0.8064 | -326.5572  |
| log_f_Thermoanaerobacteraceae | CardioEmbolicStroke | Weighted mode             | 6  | 0.9855 | 0.8186 | 1.1864 | 0.8834 | -0.1250 | 0.0958 | 0.2619 | 2.2992  | 0.8064 | -326.5572  |
| log_f_Thermoanaerobacteraceae | IschemicStroke      | MR Egger                  | 7  | 1.0018 | 0.9266 | 1.0831 | 0.9660 | -0.0036 | 0.0197 | 0.8632 | 2.8902  | 0.7169 | -326.0666  |
| log_f_Thermoanaerobacteraceae | IschemicStroke      | Weighted median           | 7  | 0.9908 | 0.9634 | 1.0189 | 0.5166 | -0.0036 | 0.0197 | 0.8632 | 2.8902  | 0.7169 | -326.0666  |
| log_f_Thermoanaerobacteraceae | IschemicStroke      | Inverse variance weighted | 7  | 0.9949 | 0.9720 | 1.0183 | 0.6665 | -0.0036 | 0.0197 | 0.8632 | 2.8902  | 0.7169 | -326.0666  |
| log_f_Thermoanaerobacteraceae | IschemicStroke      | Simple mode               | 7  | 0.9889 | 0.9489 | 1.0305 | 0.6136 | -0.0036 | 0.0197 | 0.8632 | 2.8902  | 0.7169 | -326.0666  |
| log_f_Thermoanaerobacteraceae | IschemicStroke      | Weighted mode             | 7  | 0.9884 | 0.9519 | 1.0263 | 0.5645 | -0.0036 | 0.0197 | 0.8632 | 2.8902  | 0.7169 | -326.0666  |
| log_f_Thermoanaerobacteraceae | LargeArteryStroke   | MR Egger                  | 7  | 1.1172 | 0.8628 | 1.4465 | 0.4390 | -0.0665 | 0.0648 | 0.3517 | 5.3095  | 0.5048 | -38.8370   |
| log_f_Thermoanaerobacteraceae | LargeArteryStroke   | Weighted median           | 7  | 0.9694 | 0.8776 | 1.0708 | 0.5403 | -0.0665 | 0.0648 | 0.3517 | 5.3095  | 0.5048 | -38.8370   |
| log_f_Thermoanaerobacteraceae | LargeArteryStroke   | Inverse variance weighted | 7  | 0.9816 | 0.9100 | 1.0589 | 0.6310 | -0.0665 | 0.0648 | 0.3517 | 5.3095  | 0.5048 | -38.8370   |
| log_f_Thermoanaerobacteraceae | LargeArteryStroke   | Simple mode               | 7  | 0.9716 | 0.8594 | 1.0983 | 0.6608 | -0.0665 | 0.0648 | 0.3517 | 5.3095  | 0.5048 | -38.8370   |
| log_f_Thermoanaerobacteraceae | LargeArteryStroke   | Weighted mode             | 7  | 0.9667 | 0.8556 | 1.0922 | 0.6062 | -0.0665 | 0.0648 | 0.3517 | 5.3095  | 0.5048 | -38.8370   |
| log_f_Thermoanaerobacteraceae | SmallVesselStroke   | MR Egger                  | 7  | 1.1173 | 0.9489 | 1.3157 | 0.2407 | -0.0605 | 0.0410 | 0.2000 | 9.2816  | 0.1584 | -87.9805   |
| log_f_Thermoanaerobacteraceae | SmallVesselStroke   | Weighted median           | 7  | 0.9985 | 0.9421 | 1.0581 | 0.9584 | -0.0605 | 0.0410 | 0.2000 | 9.2816  | 0.1584 | -87.9805   |
| log_f_Thermoanaerobacteraceae | SmallVesselStroke   | Inverse variance weighted | 7  | 0.9933 | 0.9427 | 1.0467 | 0.8018 | -0.0605 | 0.0410 | 0.2000 | 9.2816  | 0.1584 | -87.9805   |
| log_f_Thermoanaerobacteraceae | SmallVesselStroke   | Simple mode               | 7  | 0.9944 | 0.9098 | 1.0870 | 0.9059 | -0.0605 | 0.0410 | 0.2000 | 9.2816  | 0.1584 | -87.9805   |
| log_f_Thermoanaerobacteraceae | SmallVesselStroke   | Weighted mode             | 7  | 0.9955 | 0.9162 | 1.0816 | 0.9185 | -0.0605 | 0.0410 | 0.2000 | 9.2816  | 0.1584 | -87.9805   |
| log_f_Thermoanaerobacteraceae | Stroke              | MR Egger                  | 7  | 1.0203 | 0.9431 | 1.1037 | 0.6383 | -0.0091 | 0.0199 | 0.6669 | 7.3557  | 0.1955 | -249.4605  |
| log_f_Thermoanaerobacteraceae | Stroke              | Weighted median           | 7  | 0.9894 | 0.9644 | 1.0151 | 0.4159 | -0.0091 | 0.0199 | 0.6669 | 7.3557  | 0.1955 | -249.4605  |
| log_f_Thermoanaerobacteraceae | Stroke              | Inverse variance weighted | 7  | 1.0026 | 0.9804 | 1.0253 | 0.8194 | -0.0091 | 0.0199 | 0.6669 | 7.3557  | 0.1955 | -249.4605  |
| log_f_Thermoanaerobacteraceae | Stroke              | Simple mode               | 7  | 0.9855 | 0.9488 | 1.0236 | 0.4801 | -0.0091 | 0.0199 | 0.6669 | 7.3557  | 0.1955 | -249.4605  |
| log_f_Thermoanaerobacteraceae | Stroke              | Weighted mode             | 7  | 0.9848 | 0.9506 | 1.0204 | 0.4306 | -0.0091 | 0.0199 | 0.6669 | 7.3557  | 0.1955 | -249.4605  |
| log_g_Acetivibrio             | CardioEmbolicStroke | MR Egger                  | 8  | 1.0443 | 0.7582 | 1.4384 | 0.7996 | -0.0028 | 0.0758 | 0.9718 | 7.3329  | 0.2912 | -139.7458  |
| log_g_Acetivibrio             | CardioEmbolicStroke | Weighted median           | 8  | 1.0652 | 0.9458 | 1.1997 | 0.2979 | -0.0028 | 0.0758 | 0.9718 | 7.3329  | 0.2912 | -139.7458  |
| log_g_Acetivibrio             | CardioEmbolicStroke | Inverse variance weighted | 8  | 1.0383 | 0.9489 | 1.1362 | 0.4133 | -0.0028 | 0.0758 | 0.9718 | 7.3329  | 0.2912 | -139.7458  |
| log_g_Acetivibrio             | CardioEmbolicStroke | Simple mode               | 8  | 1.0972 | 0.9180 | 1.3114 | 0.3418 | -0.0028 | 0.0758 | 0.9718 | 7.3329  | 0.2912 | -139.7458  |
| log_g_Acetivibrio             | CardioEmbolicStroke | Weighted mode             | 8  | 1.1149 | 0.9321 | 1.3335 | 0.2726 | -0.0028 | 0.0758 | 0.9718 | 7.3329  | 0.2912 | -139.7458  |
| log_g_Acetivibrio             | IschemicStroke      | MR Egger                  | 9  | 1.0089 | 0.9473 | 1.0744 | 0.7913 | 0.0007  | 0.0152 | 0.9630 | 2.4305  | 0.9322 | -559.7584  |
| log_g_Acetivibrio             | IschemicStroke      | Weighted median           | 9  | 1.0024 | 0.9774 | 1.0280 | 0.8534 | 0.0007  | 0.0152 | 0.9630 | 2.4305  | 0.9322 | -559.7584  |
| log_g_Acetivibrio             | IschemicStroke      | Inverse variance weighted | 9  | 1.0104 | 0.9907 | 1.0304 | 0.3039 | 0.0007  | 0.0152 | 0.9630 | 2.4305  | 0.9322 | -559.7584  |
| log_g_Acetivibrio             | IschemicStroke      | Simple mode               | 9  | 0.9999 | 0.9644 | 1.0367 | 0.9970 | 0.0007  | 0.0152 | 0.9630 | 2.4305  | 0.9322 | -559.7584  |
| log_g_Acetivibrio             | IschemicStroke      | Weighted mode             | 9  | 0.9996 | 0.9685 | 1.0318 | 0.9827 | 0.0007  | 0.0152 | 0.9630 | 2.4305  | 0.9322 | -559.7584  |
| log_g_Acetivibrio             | LargeArteryStroke   | MR Egger                  | 9  | 1.0884 | 0.8872 | 1.3352 | 0.4434 | -0.0416 | 0.0494 | 0.4270 | 5.1562  | 0.6409 | -96.2311   |
| log_g_Acetivibrio             | LargeArteryStroke   | Weighted median           | 9  | 0.9652 | 0.8882 | 1.0488 | 0.4035 | -0.0416 | 0.0494 | 0.4270 | 5.1562  | 0.6409 | -96.2311   |
| log_g_Acetivibrio             | LargeArteryStroke   | Inverse variance weighted | 9  | 1.0012 | 0.9393 | 1.0670 | 0.9716 | -0.0416 | 0.0494 | 0.4270 | 5.1562  | 0.6409 | -96.2311   |
| log_g_Acetivibrio             | LargeArteryStroke   | Simple mode               | 9  | 0.9362 | 0.8183 | 1.0710 | 0.3648 | -0.0416 | 0.0494 | 0.4270 | 5.1562  | 0.6409 | -96.2311   |
| log_g_Acetivibrio             | LargeArteryStroke   | Weighted mode             | 9  | 0.9407 | 0.8341 | 1.0611 | 0.3491 | -0.0416 | 0.0494 | 0.4270 | 5.1562  | 0.6409 | -96.2311   |
| log_g_Acetivibrio             | SmallVesselStroke   | MR Egger                  | 9  | 0.9252 | 0.8267 | 1.0354 | 0.2177 | 0.0378  | 0.0272 | 0.2080 | 8.1593  | 0.4181 | -236.6593  |

|                      |                     |                           |    |        |        |        |        |         |        |        |        |        |            |
|----------------------|---------------------|---------------------------|----|--------|--------|--------|--------|---------|--------|--------|--------|--------|------------|
| log_g_Acetivibrio    | SmallVesselStroke   | Weighted median           | 9  | 0.9759 | 0.9296 | 1.0245 | 0.3245 | 0.0378  | 0.0272 | 0.2080 | 8.1593 | 0.4181 | -236.6593  |
| log_g_Acetivibrio    | SmallVesselStroke   | Inverse variance weighted | 9  | 0.9978 | 0.9629 | 1.0341 | 0.9055 | 0.0378  | 0.0272 | 0.2080 | 8.1593 | 0.4181 | -236.6593  |
| log_g_Acetivibrio    | SmallVesselStroke   | Simple mode               | 9  | 0.9605 | 0.8840 | 1.0436 | 0.3687 | 0.0378  | 0.0272 | 0.2080 | 8.1593 | 0.4181 | -236.6593  |
| log_g_Acetivibrio    | SmallVesselStroke   | Weighted mode             | 9  | 0.9651 | 0.8950 | 1.0407 | 0.3835 | 0.0378  | 0.0272 | 0.2080 | 8.1593 | 0.4181 | -236.6593  |
| log_g_Acetivibrio    | Stroke              | MR Egger                  | 9  | 0.9939 | 0.9407 | 1.0502 | 0.8351 | 0.0073  | 0.0132 | 0.5989 | 2.8785 | 0.8960 | -810.9921  |
| log_g_Acetivibrio    | Stroke              | Weighted median           | 9  | 1.0066 | 0.9850 | 1.0288 | 0.5507 | 0.0073  | 0.0132 | 0.5989 | 2.8785 | 0.8960 | -810.9921  |
| log_g_Acetivibrio    | Stroke              | Inverse variance weighted | 9  | 1.0087 | 0.9918 | 1.0259 | 0.3157 | 0.0073  | 0.0132 | 0.5989 | 2.8785 | 0.8960 | -810.9921  |
| log_g_Acetivibrio    | Stroke              | Simple mode               | 9  | 1.0047 | 0.9737 | 1.0367 | 0.7754 | 0.0073  | 0.0132 | 0.5989 | 2.8785 | 0.8960 | -810.9921  |
| log_g_Acetivibrio    | Stroke              | Weighted mode             | 9  | 1.0049 | 0.9757 | 1.0351 | 0.7520 | 0.0073  | 0.0132 | 0.5989 | 2.8785 | 0.8960 | -810.9921  |
| log_g_Acidovorax     | CardioEmbolicStroke | MR Egger                  | 7  | 1.0491 | 0.6937 | 1.5866 | 0.8293 | 0.0153  | 0.0900 | 0.8720 | 4.5725 | 0.4702 | -477.6022  |
| log_g_Acidovorax     | CardioEmbolicStroke | Weighted median           | 7  | 1.0802 | 0.9407 | 1.2403 | 0.2741 | 0.0153  | 0.0900 | 0.8720 | 4.5725 | 0.4702 | -477.6022  |
| log_g_Acidovorax     | CardioEmbolicStroke | Inverse variance weighted | 7  | 1.0859 | 0.9743 | 1.2104 | 0.1364 | 0.0153  | 0.0900 | 0.8720 | 4.5725 | 0.4702 | -477.6022  |
| log_g_Acidovorax     | CardioEmbolicStroke | Simple mode               | 7  | 1.0768 | 0.8805 | 1.3168 | 0.4982 | 0.0153  | 0.0900 | 0.8720 | 4.5725 | 0.4702 | -477.6022  |
| log_g_Acidovorax     | CardioEmbolicStroke | Weighted mode             | 7  | 1.0753 | 0.8867 | 1.3040 | 0.4887 | 0.0153  | 0.0900 | 0.8720 | 4.5725 | 0.4702 | -477.6022  |
| log_g_Acidovorax     | IschemicStroke      | MR Egger                  | 10 | 0.9861 | 0.9242 | 1.0523 | 0.6846 | 0.0143  | 0.0154 | 0.3782 | 7.1935 | 0.5159 | -231.1947  |
| log_g_Acidovorax     | IschemicStroke      | Weighted median           | 10 | 1.0121 | 0.9814 | 1.0437 | 0.4457 | 0.0143  | 0.0154 | 0.3782 | 7.1935 | 0.5159 | -231.1947  |
| log_g_Acidovorax     | IschemicStroke      | Inverse variance weighted | 10 | 1.0152 | 0.9926 | 1.0382 | 0.1888 | 0.0143  | 0.0154 | 0.3782 | 7.1935 | 0.5159 | -231.1947  |
| log_g_Acidovorax     | IschemicStroke      | Simple mode               | 10 | 1.0099 | 0.9617 | 1.0605 | 0.7033 | 0.0143  | 0.0154 | 0.3782 | 7.1935 | 0.5159 | -231.1947  |
| log_g_Acidovorax     | IschemicStroke      | Weighted mode             | 10 | 1.0122 | 0.9639 | 1.0630 | 0.6373 | 0.0143  | 0.0154 | 0.3782 | 7.1935 | 0.5159 | -231.1947  |
| log_g_Acidovorax     | LargeArteryStroke   | MR Egger                  | 9  | 0.8717 | 0.6989 | 1.0871 | 0.2624 | 0.0701  | 0.0513 | 0.2142 | 7.5432 | 0.4793 | -82.7466   |
| log_g_Acidovorax     | LargeArteryStroke   | Weighted median           | 9  | 0.9853 | 0.8901 | 1.0907 | 0.7750 | 0.0701  | 0.0513 | 0.2142 | 7.5432 | 0.4793 | -82.7466   |
| log_g_Acidovorax     | LargeArteryStroke   | Inverse variance weighted | 9  | 1.0076 | 0.9354 | 1.0855 | 0.8416 | 0.0701  | 0.0513 | 0.2142 | 7.5432 | 0.4793 | -82.7466   |
| log_g_Acidovorax     | LargeArteryStroke   | Simple mode               | 9  | 0.9671 | 0.8325 | 1.1235 | 0.6738 | 0.0701  | 0.0513 | 0.2142 | 7.5432 | 0.4793 | -82.7466   |
| log_g_Acidovorax     | LargeArteryStroke   | Weighted mode             | 9  | 0.9707 | 0.8382 | 1.1242 | 0.7016 | 0.0701  | 0.0513 | 0.2142 | 7.5432 | 0.4793 | -82.7466   |
| log_g_Acidovorax     | SmallVesselStroke   | MR Egger                  | 9  | 1.0387 | 0.9199 | 1.1728 | 0.5597 | -0.0142 | 0.0283 | 0.6302 | 3.0922 | 0.8763 | -203.4822  |
| log_g_Acidovorax     | SmallVesselStroke   | Weighted median           | 9  | 0.9945 | 0.9431 | 1.0487 | 0.8377 | -0.0142 | 0.0283 | 0.6302 | 3.0922 | 0.8763 | -203.4822  |
| log_g_Acidovorax     | SmallVesselStroke   | Inverse variance weighted | 9  | 1.0086 | 0.9679 | 1.0512 | 0.6826 | -0.0142 | 0.0283 | 0.6302 | 3.0922 | 0.8763 | -203.4822  |
| log_g_Acidovorax     | SmallVesselStroke   | Simple mode               | 9  | 0.9829 | 0.9118 | 1.0597 | 0.6655 | -0.0142 | 0.0283 | 0.6302 | 3.0922 | 0.8763 | -203.4822  |
| log_g_Acidovorax     | SmallVesselStroke   | Weighted mode             | 9  | 0.9921 | 0.9197 | 1.0703 | 0.8435 | -0.0142 | 0.0283 | 0.6302 | 3.0922 | 0.8763 | -203.4822  |
| log_g_Acidovorax     | Stroke              | MR Egger                  | 10 | 0.9922 | 0.9409 | 1.0463 | 0.7802 | 0.0097  | 0.0127 | 0.4678 | 2.8697 | 0.9692 | -439.4959  |
| log_g_Acidovorax     | Stroke              | Weighted median           | 10 | 1.0087 | 0.9849 | 1.0331 | 0.4779 | 0.0097  | 0.0127 | 0.4678 | 2.8697 | 0.9692 | -439.4959  |
| log_g_Acidovorax     | Stroke              | Inverse variance weighted | 10 | 1.0116 | 0.9929 | 1.0306 | 0.2261 | 0.0097  | 0.0127 | 0.4678 | 2.8697 | 0.9692 | -439.4959  |
| log_g_Acidovorax     | Stroke              | Simple mode               | 10 | 1.0099 | 0.9705 | 1.0508 | 0.6395 | 0.0097  | 0.0127 | 0.4678 | 2.8697 | 0.9692 | -439.4959  |
| log_g_Acidovorax     | Stroke              | Weighted mode             | 10 | 1.0115 | 0.9766 | 1.0476 | 0.5384 | 0.0097  | 0.0127 | 0.4678 | 2.8697 | 0.9692 | -439.4959  |
| log_g_Actinobacillus | CardioEmbolicStroke | MR Egger                  | 4  | 0.7717 | 0.2036 | 2.9246 | 0.7397 | 0.0676  | 0.2565 | 0.8167 | 0.6328 | 0.7288 | 666.8964   |
| log_g_Actinobacillus | CardioEmbolicStroke | Weighted median           | 4  | 0.9328 | 0.7879 | 1.1044 | 0.4195 | 0.0676  | 0.2565 | 0.8167 | 0.6328 | 0.7288 | 666.8964   |
| log_g_Actinobacillus | CardioEmbolicStroke | Inverse variance weighted | 4  | 0.9222 | 0.7976 | 1.0662 | 0.2740 | 0.0676  | 0.2565 | 0.8167 | 0.6328 | 0.7288 | 666.8964   |
| log_g_Actinobacillus | CardioEmbolicStroke | Simple mode               | 4  | 0.9712 | 0.7703 | 1.2245 | 0.8207 | 0.0676  | 0.2565 | 0.8167 | 0.6328 | 0.7288 | 666.8964   |
| log_g_Actinobacillus | CardioEmbolicStroke | Weighted mode             | 4  | 0.9720 | 0.7723 | 1.2234 | 0.8244 | 0.0676  | 0.2565 | 0.8167 | 0.6328 | 0.7288 | 666.8964   |
| log_g_Actinobacillus | IschemicStroke      | MR Egger                  | 5  | 0.9910 | 0.8759 | 1.1211 | 0.8948 | 0.0130  | 0.0253 | 0.6422 | 1.9708 | 0.5785 | -2989.4363 |
| log_g_Actinobacillus | IschemicStroke      | Weighted median           | 5  | 1.0261 | 0.9871 | 1.0666 | 0.1932 | 0.0130  | 0.0253 | 0.6422 | 1.9708 | 0.5785 | -2989.4363 |
| log_g_Actinobacillus | IschemicStroke      | Inverse variance weighted | 5  | 1.0226 | 0.9913 | 1.0548 | 0.1585 | 0.0130  | 0.0253 | 0.6422 | 1.9708 | 0.5785 | -2989.4363 |
| log_g_Actinobacillus | IschemicStroke      | Simple mode               | 5  | 1.0385 | 0.9795 | 1.1011 | 0.2743 | 0.0130  | 0.0253 | 0.6422 | 1.9708 | 0.5785 | -2989.4363 |
| log_g_Actinobacillus | IschemicStroke      | Weighted mode             | 5  | 1.0411 | 0.9842 | 1.1012 | 0.2328 | 0.0130  | 0.0253 | 0.6422 | 1.9708 | 0.5785 | -2989.4363 |
| log_g_Actinobacillus | LargeArteryStroke   | MR Egger                  | 4  | 0.7295 | 0.2704 | 1.9677 | 0.5968 | 0.1042  | 0.1909 | 0.6398 | 0.6229 | 0.7324 | 1107.6958  |
| log_g_Actinobacillus | LargeArteryStroke   | Weighted median           | 4  | 0.9601 | 0.8477 | 1.0873 | 0.5208 | 0.1042  | 0.1909 | 0.6398 | 0.6229 | 0.7324 | 1107.6958  |
| log_g_Actinobacillus | LargeArteryStroke   | Inverse variance weighted | 4  | 0.9602 | 0.8617 | 1.0699 | 0.4616 | 0.1042  | 0.1909 | 0.6398 | 0.6229 | 0.7324 | 1107.6958  |
| log_g_Actinobacillus | LargeArteryStroke   | Simple mode               | 4  | 0.9319 | 0.7845 | 1.1071 | 0.4809 | 0.1042  | 0.1909 | 0.6398 | 0.6229 | 0.7324 | 1107.6958  |
| log_g_Actinobacillus | LargeArteryStroke   | Weighted mode             | 4  | 0.9449 | 0.7924 | 1.1266 | 0.5724 | 0.1042  | 0.1909 | 0.6398 | 0.6229 | 0.7324 | 1107.6958  |
| log_g_Actinobacillus | SmallVesselStroke   | MR Egger                  | 5  | 1.0151 | 0.8096 | 1.2728 | 0.9049 | 0.0015  | 0.0463 | 0.9762 | 1.4389 | 0.6964 | -2780.3677 |
| log_g_Actinobacillus | SmallVesselStroke   | Weighted median           | 5  | 1.0167 | 0.9453 | 1.0936 | 0.6554 | 0.0015  | 0.0463 | 0.9762 | 1.4389 | 0.6964 | -2780.3677 |
| log_g_Actinobacillus | SmallVesselStroke   | Inverse variance weighted | 5  | 1.0188 | 0.9632 | 1.0776 | 0.5158 | 0.0015  | 0.0463 | 0.9762 | 1.4389 | 0.6964 | -2780.3677 |
| log_g_Actinobacillus | SmallVesselStroke   | Simple mode               | 5  | 1.0028 | 0.9167 | 1.0969 | 0.9543 | 0.0015  | 0.0463 | 0.9762 | 1.4389 | 0.6964 | -2780.3677 |

|                        |                     |                           |    |        |        |        |        |         |        |        |         |        |            |
|------------------------|---------------------|---------------------------|----|--------|--------|--------|--------|---------|--------|--------|---------|--------|------------|
| log_g_Actinobacillus   | SmallVesselStroke   | Weighted mode             | 5  | 1.0116 | 0.9245 | 1.1070 | 0.8141 | 0.0015  | 0.0463 | 0.9762 | 1.4389  | 0.6964 | -2780.3677 |
| log_g_Actinobacillus   | Stroke              | MR Egger                  | 6  | 1.0016 | 0.8554 | 1.1729 | 0.9847 | 0.0024  | 0.0322 | 0.9439 | 10.5584 | 0.0320 | -1564.6827 |
| log_g_Actinobacillus   | Stroke              | Weighted median           | 6  | 1.0194 | 0.9842 | 1.0558 | 0.2835 | 0.0024  | 0.0322 | 0.9439 | 10.5584 | 0.0320 | -1564.6827 |
| log_g_Actinobacillus   | Stroke              | Inverse variance weighted | 6  | 1.0075 | 0.9716 | 1.0448 | 0.6868 | 0.0024  | 0.0322 | 0.9439 | 10.5584 | 0.0320 | -1564.6827 |
| log_g_Actinobacillus   | Stroke              | Simple mode               | 6  | 1.0258 | 0.9827 | 1.0707 | 0.2972 | 0.0024  | 0.0322 | 0.9439 | 10.5584 | 0.0320 | -1564.6827 |
| log_g_Actinobacillus   | Stroke              | Weighted mode             | 6  | 1.0263 | 0.9855 | 1.0689 | 0.2654 | 0.0024  | 0.0322 | 0.9439 | 10.5584 | 0.0320 | -1564.6827 |
| log_g_Alkaliphilus     | CardioEmbolicStroke | MR Egger                  | 11 | 1.3266 | 1.0021 | 1.7563 | 0.0797 | -0.1145 | 0.0668 | 0.1206 | 12.3657 | 0.2613 | -35.8361   |
| log_g_Alkaliphilus     | CardioEmbolicStroke | Weighted median           | 11 | 1.0666 | 0.9539 | 1.1925 | 0.2580 | -0.1145 | 0.0668 | 0.1206 | 12.3657 | 0.2613 | -35.8361   |
| log_g_Alkaliphilus     | CardioEmbolicStroke | Inverse variance weighted | 11 | 1.0492 | 0.9590 | 1.1480 | 0.2952 | -0.1145 | 0.0668 | 0.1206 | 12.3657 | 0.2613 | -35.8361   |
| log_g_Alkaliphilus     | CardioEmbolicStroke | Simple mode               | 11 | 1.0718 | 0.8723 | 1.3169 | 0.5245 | -0.1145 | 0.0668 | 0.1206 | 12.3657 | 0.2613 | -35.8361   |
| log_g_Alkaliphilus     | CardioEmbolicStroke | Weighted mode             | 11 | 1.0825 | 0.8986 | 1.3041 | 0.4235 | -0.1145 | 0.0668 | 0.1206 | 12.3657 | 0.2613 | -35.8361   |
| log_g_Alkaliphilus     | IschemicStroke      | MR Egger                  | 12 | 0.9996 | 0.9075 | 1.1010 | 0.9932 | -0.0015 | 0.0235 | 0.9506 | 28.6429 | 0.0014 | -103.3672  |
| log_g_Alkaliphilus     | IschemicStroke      | Weighted median           | 12 | 0.9872 | 0.9577 | 1.0175 | 0.4026 | -0.0015 | 0.0235 | 0.9506 | 28.6429 | 0.0014 | -103.3672  |
| log_g_Alkaliphilus     | IschemicStroke      | Inverse variance weighted | 12 | 0.9966 | 0.9676 | 1.0264 | 0.8213 | -0.0015 | 0.0235 | 0.9506 | 28.6429 | 0.0014 | -103.3672  |
| log_g_Alkaliphilus     | IschemicStroke      | Simple mode               | 12 | 0.9642 | 0.9007 | 1.0321 | 0.3162 | -0.0015 | 0.0235 | 0.9506 | 28.6429 | 0.0014 | -103.3672  |
| log_g_Alkaliphilus     | IschemicStroke      | Weighted mode             | 12 | 0.9712 | 0.9154 | 1.0304 | 0.3540 | -0.0015 | 0.0235 | 0.9506 | 28.6429 | 0.0014 | -103.3672  |
| log_g_Alkaliphilus     | LargeArteryStroke   | MR Egger                  | 12 | 0.9023 | 0.6967 | 1.1686 | 0.4540 | 0.0559  | 0.0629 | 0.3949 | 21.2777 | 0.0306 | -14.3099   |
| log_g_Alkaliphilus     | LargeArteryStroke   | Weighted median           | 12 | 1.0334 | 0.9452 | 1.1298 | 0.4705 | 0.0559  | 0.0629 | 0.3949 | 21.2777 | 0.0306 | -14.3099   |
| log_g_Alkaliphilus     | LargeArteryStroke   | Inverse variance weighted | 12 | 1.0083 | 0.9283 | 1.0951 | 0.8453 | 0.0559  | 0.0629 | 0.3949 | 21.2777 | 0.0306 | -14.3099   |
| log_g_Alkaliphilus     | LargeArteryStroke   | Simple mode               | 12 | 1.1021 | 0.9154 | 1.3269 | 0.3266 | 0.0559  | 0.0629 | 0.3949 | 21.2777 | 0.0306 | -14.3099   |
| log_g_Alkaliphilus     | LargeArteryStroke   | Weighted mode             | 12 | 1.0709 | 0.8900 | 1.2886 | 0.4830 | 0.0559  | 0.0629 | 0.3949 | 21.2777 | 0.0306 | -14.3099   |
| log_g_Alkaliphilus     | SmallVesselStroke   | MR Egger                  | 12 | 0.9527 | 0.8497 | 1.0681 | 0.4255 | 0.0309  | 0.0279 | 0.2933 | 14.0079 | 0.2326 | -97.8751   |
| log_g_Alkaliphilus     | SmallVesselStroke   | Weighted median           | 12 | 0.9949 | 0.9494 | 1.0427 | 0.8316 | 0.0309  | 0.0279 | 0.2933 | 14.0079 | 0.2326 | -97.8751   |
| log_g_Alkaliphilus     | SmallVesselStroke   | Inverse variance weighted | 12 | 1.0129 | 0.9761 | 1.0511 | 0.4963 | 0.0309  | 0.0279 | 0.2933 | 14.0079 | 0.2326 | -97.8751   |
| log_g_Alkaliphilus     | SmallVesselStroke   | Simple mode               | 12 | 1.0752 | 0.9801 | 1.1796 | 0.1533 | 0.0309  | 0.0279 | 0.2933 | 14.0079 | 0.2326 | -97.8751   |
| log_g_Alkaliphilus     | SmallVesselStroke   | Weighted mode             | 12 | 0.9701 | 0.8971 | 1.0490 | 0.4627 | 0.0309  | 0.0279 | 0.2933 | 14.0079 | 0.2326 | -97.8751   |
| log_g_Alkaliphilus     | Stroke              | MR Egger                  | 12 | 1.0312 | 0.9582 | 1.1098 | 0.4313 | -0.0205 | 0.0178 | 0.2758 | 25.9798 | 0.0065 | -140.3347  |
| log_g_Alkaliphilus     | Stroke              | Weighted median           | 12 | 1.0029 | 0.9779 | 1.0286 | 0.8208 | -0.0205 | 0.0178 | 0.2758 | 25.9798 | 0.0065 | -140.3347  |
| log_g_Alkaliphilus     | Stroke              | Inverse variance weighted | 12 | 0.9899 | 0.9664 | 1.0139 | 0.4058 | -0.0205 | 0.0178 | 0.2758 | 25.9798 | 0.0065 | -140.3347  |
| log_g_Alkaliphilus     | Stroke              | Simple mode               | 12 | 1.0127 | 0.9703 | 1.0570 | 0.5738 | -0.0205 | 0.0178 | 0.2758 | 25.9798 | 0.0065 | -140.3347  |
| log_g_Alkaliphilus     | Stroke              | Weighted mode             | 12 | 1.0098 | 0.9751 | 1.0457 | 0.5947 | -0.0205 | 0.0178 | 0.2758 | 25.9798 | 0.0065 | -140.3347  |
| log_g_Cellulosilyticum | CardioEmbolicStroke | MR Egger                  | 11 | 1.0099 | 0.6356 | 1.6047 | 0.9676 | 0.0094  | 0.0997 | 0.9268 | 8.0601  | 0.5281 | -158.4430  |
| log_g_Cellulosilyticum | CardioEmbolicStroke | Weighted median           | 11 | 1.0792 | 0.9694 | 1.2015 | 0.1640 | 0.0094  | 0.0997 | 0.9268 | 8.0601  | 0.5281 | -158.4430  |
| log_g_Cellulosilyticum | CardioEmbolicStroke | Inverse variance weighted | 11 | 1.0323 | 0.9511 | 1.1205 | 0.4465 | 0.0094  | 0.0997 | 0.9268 | 8.0601  | 0.5281 | -158.4430  |
| log_g_Cellulosilyticum | CardioEmbolicStroke | Simple mode               | 11 | 1.1010 | 0.9254 | 1.3099 | 0.3032 | 0.0094  | 0.0997 | 0.9268 | 8.0601  | 0.5281 | -158.4430  |
| log_g_Cellulosilyticum | CardioEmbolicStroke | Weighted mode             | 11 | 1.0895 | 0.9251 | 1.2831 | 0.3286 | 0.0094  | 0.0997 | 0.9268 | 8.0601  | 0.5281 | -158.4430  |
| log_g_Cellulosilyticum | IschemicStroke      | MR Egger                  | 13 | 1.0005 | 0.9407 | 1.0641 | 0.9874 | -0.0065 | 0.0141 | 0.6555 | 10.2521 | 0.5079 | -149.4296  |
| log_g_Cellulosilyticum | IschemicStroke      | Weighted median           | 13 | 0.9868 | 0.9627 | 1.0116 | 0.2941 | -0.0065 | 0.0141 | 0.6555 | 10.2521 | 0.5079 | -149.4296  |
| log_g_Cellulosilyticum | IschemicStroke      | Inverse variance weighted | 13 | 0.9868 | 0.9695 | 1.0044 | 0.1409 | -0.0065 | 0.0141 | 0.6555 | 10.2521 | 0.5079 | -149.4296  |
| log_g_Cellulosilyticum | IschemicStroke      | Simple mode               | 13 | 0.9801 | 0.9362 | 1.0261 | 0.4078 | -0.0065 | 0.0141 | 0.6555 | 10.2521 | 0.5079 | -149.4296  |
| log_g_Cellulosilyticum | IschemicStroke      | Weighted mode             | 13 | 0.9850 | 0.9458 | 1.0259 | 0.4813 | -0.0065 | 0.0141 | 0.6555 | 10.2521 | 0.5079 | -149.4296  |
| log_g_Cellulosilyticum | LargeArteryStroke   | MR Egger                  | 12 | 0.9179 | 0.7314 | 1.1520 | 0.4769 | 0.0255  | 0.0510 | 0.6277 | 10.1145 | 0.4305 | -50.5383   |
| log_g_Cellulosilyticum | LargeArteryStroke   | Weighted median           | 12 | 0.9687 | 0.8909 | 1.0533 | 0.4567 | 0.0255  | 0.0510 | 0.6277 | 10.1145 | 0.4305 | -50.5383   |
| log_g_Cellulosilyticum | LargeArteryStroke   | Inverse variance weighted | 12 | 0.9708 | 0.9159 | 1.0291 | 0.3194 | 0.0255  | 0.0510 | 0.6277 | 10.1145 | 0.4305 | -50.5383   |
| log_g_Cellulosilyticum | LargeArteryStroke   | Simple mode               | 12 | 0.9514 | 0.8120 | 1.1146 | 0.5498 | 0.0255  | 0.0510 | 0.6277 | 10.1145 | 0.4305 | -50.5383   |
| log_g_Cellulosilyticum | LargeArteryStroke   | Weighted mode             | 12 | 0.8961 | 0.7581 | 1.0593 | 0.2252 | 0.0255  | 0.0510 | 0.6277 | 10.1145 | 0.4305 | -50.5383   |
| log_g_Cellulosilyticum | SmallVesselStroke   | MR Egger                  | 12 | 1.0421 | 0.8850 | 1.2269 | 0.6317 | -0.0268 | 0.0368 | 0.4821 | 17.1717 | 0.0706 | -147.0555  |
| log_g_Cellulosilyticum | SmallVesselStroke   | Weighted median           | 12 | 0.9915 | 0.9440 | 1.0413 | 0.7316 | -0.0268 | 0.0368 | 0.4821 | 17.1717 | 0.0706 | -147.0555  |
| log_g_Cellulosilyticum | SmallVesselStroke   | Inverse variance weighted | 12 | 0.9826 | 0.9426 | 1.0244 | 0.4086 | -0.0268 | 0.0368 | 0.4821 | 17.1717 | 0.0706 | -147.0555  |
| log_g_Cellulosilyticum | SmallVesselStroke   | Simple mode               | 12 | 0.9940 | 0.9158 | 1.0789 | 0.8886 | -0.0268 | 0.0368 | 0.4821 | 17.1717 | 0.0706 | -147.0555  |
| log_g_Cellulosilyticum | SmallVesselStroke   | Weighted mode             | 12 | 0.9924 | 0.9180 | 1.0729 | 0.8521 | -0.0268 | 0.0368 | 0.4821 | 17.1717 | 0.0706 | -147.0555  |
| log_g_Cellulosilyticum | Stroke              | MR Egger                  | 13 | 1.0135 | 0.9602 | 1.0696 | 0.6367 | -0.0093 | 0.0123 | 0.4651 | 12.4822 | 0.3285 | -178.1456  |
| log_g_Cellulosilyticum | Stroke              | Weighted median           | 13 | 0.9997 | 0.9798 | 1.0201 | 0.9789 | -0.0093 | 0.0123 | 0.4651 | 12.4822 | 0.3285 | -178.1456  |

|                        |                     |                           |    |        |        |        |        |         |        |        |         |        |                |
|------------------------|---------------------|---------------------------|----|--------|--------|--------|--------|---------|--------|--------|---------|--------|----------------|
| log_g_Cellulosilyticum | Stroke              | Inverse variance weighted | 13 | 0.9935 | 0.9781 | 1.0091 | 0.4118 | -0.0093 | 0.0123 | 0.4651 | 12.4822 | 0.3285 | -178.1456      |
| log_g_Cellulosilyticum | Stroke              | Simple mode               | 13 | 1.0042 | 0.9689 | 1.0408 | 0.8221 | -0.0093 | 0.0123 | 0.4651 | 12.4822 | 0.3285 | -178.1456      |
| log_g_Cellulosilyticum | Stroke              | Weighted mode             | 13 | 1.0064 | 0.9738 | 1.0400 | 0.7106 | -0.0093 | 0.0123 | 0.4651 | 12.4822 | 0.3285 | -178.1456      |
| log_g_Cronobacter      | CardioEmbolicStroke | MR Egger                  | 4  | 0.9314 | 0.4456 | 1.9471 | 0.8677 | 0.0990  | 0.2490 | 0.7293 | 3.0938  | 0.2129 | -97.5394       |
| log_g_Cronobacter      | CardioEmbolicStroke | Weighted median           | 4  | 1.0695 | 0.8942 | 1.2793 | 0.4620 | 0.0990  | 0.2490 | 0.7293 | 3.0938  | 0.2129 | -97.5394       |
| log_g_Cronobacter      | CardioEmbolicStroke | Inverse variance weighted | 4  | 1.0768 | 0.9239 | 1.2551 | 0.3437 | 0.0990  | 0.2490 | 0.7293 | 3.0938  | 0.2129 | -97.5394       |
| log_g_Cronobacter      | CardioEmbolicStroke | Simple mode               | 4  | 1.1987 | 0.9051 | 1.5875 | 0.2955 | 0.0990  | 0.2490 | 0.7293 | 3.0938  | 0.2129 | -97.5394       |
| log_g_Cronobacter      | CardioEmbolicStroke | Weighted mode             | 4  | 0.9924 | 0.7364 | 1.3375 | 0.9634 | 0.0990  | 0.2490 | 0.7293 | 3.0938  | 0.2129 | -97.5394       |
| log_g_Cronobacter      | IschemicStroke      | MR Egger                  | 5  | 1.0141 | 0.8867 | 1.1598 | 0.8515 | -0.0127 | 0.0454 | 0.7974 | 1.7462  | 0.6267 | -675.5935      |
| log_g_Cronobacter      | IschemicStroke      | Weighted median           | 5  | 0.9994 | 0.9614 | 1.0390 | 0.9778 | -0.0127 | 0.0454 | 0.7974 | 1.7462  | 0.6267 | -675.5935      |
| log_g_Cronobacter      | IschemicStroke      | Inverse variance weighted | 5  | 0.9953 | 0.9644 | 1.0272 | 0.7705 | -0.0127 | 0.0454 | 0.7974 | 1.7462  | 0.6267 | -675.5935      |
| log_g_Cronobacter      | IschemicStroke      | Simple mode               | 5  | 1.0094 | 0.9558 | 1.0661 | 0.7532 | -0.0127 | 0.0454 | 0.7974 | 1.7462  | 0.6267 | -675.5935      |
| log_g_Cronobacter      | IschemicStroke      | Weighted mode             | 5  | 1.0088 | 0.9601 | 1.0599 | 0.7457 | -0.0127 | 0.0454 | 0.7974 | 1.7462  | 0.6267 | -675.5935      |
| log_g_Cronobacter      | LargeArteryStroke   | MR Egger                  | 4  | 1.2582 | 0.8092 | 1.9564 | 0.4150 | -0.1742 | 0.1489 | 0.3627 | 2.4693  | 0.4809 | -329.0285      |
| log_g_Cronobacter      | LargeArteryStroke   | Weighted median           | 4  | 0.9901 | 0.8717 | 1.1245 | 0.8778 | -0.1742 | 0.1489 | 0.3627 | 2.4693  | 0.4809 | -329.0285      |
| log_g_Cronobacter      | LargeArteryStroke   | Inverse variance weighted | 4  | 0.9747 | 0.8748 | 1.0860 | 0.6420 | -0.1742 | 0.1489 | 0.3627 | 2.4693  | 0.4809 | -329.0285      |
| log_g_Cronobacter      | LargeArteryStroke   | Simple mode               | 4  | 1.0023 | 0.8193 | 1.2262 | 0.9835 | -0.1742 | 0.1489 | 0.3627 | 2.4693  | 0.4809 | -329.0285      |
| log_g_Cronobacter      | LargeArteryStroke   | Weighted mode             | 4  | 1.0090 | 0.8381 | 1.2149 | 0.9303 | -0.1742 | 0.1489 | 0.3627 | 2.4693  | 0.4809 | -329.0285      |
| log_g_Cronobacter      | SmallVesselStroke   | MR Egger                  | 4  | 0.8836 | 0.6349 | 1.2297 | 0.5395 | 0.0613  | 0.1119 | 0.6389 | 3.8315  | 0.1472 | -254.0989      |
| log_g_Cronobacter      | SmallVesselStroke   | Weighted median           | 4  | 0.9558 | 0.8827 | 1.0349 | 0.2651 | 0.0613  | 0.1119 | 0.6389 | 3.8315  | 0.1472 | -254.0989      |
| log_g_Cronobacter      | SmallVesselStroke   | Inverse variance weighted | 4  | 0.9664 | 0.8997 | 1.0379 | 0.3477 | 0.0613  | 0.1119 | 0.6389 | 3.8315  | 0.1472 | -254.0989      |
| log_g_Cronobacter      | SmallVesselStroke   | Simple mode               | 4  | 0.9496 | 0.8562 | 1.0532 | 0.3996 | 0.0613  | 0.1119 | 0.6389 | 3.8315  | 0.1472 | -254.0989      |
| log_g_Cronobacter      | SmallVesselStroke   | Weighted mode             | 4  | 0.9503 | 0.8632 | 1.0461 | 0.3746 | 0.0613  | 0.1119 | 0.6389 | 3.8315  | 0.1472 | -254.0989      |
| log_g_Cronobacter      | Stroke              | MR Egger                  | 6  | 0.9824 | 0.8955 | 1.0777 | 0.7257 | 0.0113  | 0.0294 | 0.7198 | 2.9562  | 0.5652 | -682.0504      |
| log_g_Cronobacter      | Stroke              | Weighted median           | 6  | 0.9928 | 0.9605 | 1.0262 | 0.6694 | 0.0113  | 0.0294 | 0.7198 | 2.9562  | 0.5652 | -682.0504      |
| log_g_Cronobacter      | Stroke              | Inverse variance weighted | 6  | 0.9997 | 0.9743 | 1.0257 | 0.9814 | 0.0113  | 0.0294 | 0.7198 | 2.9562  | 0.5652 | -682.0504      |
| log_g_Cronobacter      | Stroke              | Simple mode               | 6  | 0.9841 | 0.9364 | 1.0342 | 0.5554 | 0.0113  | 0.0294 | 0.7198 | 2.9562  | 0.5652 | -682.0504      |
| log_g_Cronobacter      | Stroke              | Weighted mode             | 6  | 0.9862 | 0.9437 | 1.0307 | 0.5637 | 0.0113  | 0.0294 | 0.7198 | 2.9562  | 0.5652 | -682.0504      |
| log_g_Dickeya          | CardioEmbolicStroke | MR Egger                  | 4  | 0.6958 | 0.2871 | 1.6860 | 0.5061 | 0.1324  | 0.2119 | 0.5960 | 4.2775  | 0.1178 | -1802166.6839  |
| log_g_Dickeya          | CardioEmbolicStroke | Weighted median           | 4  | 0.9689 | 0.8136 | 1.1539 | 0.7232 | 0.1324  | 0.2119 | 0.5960 | 4.2775  | 0.1178 | -1802166.6839  |
| log_g_Dickeya          | CardioEmbolicStroke | Inverse variance weighted | 4  | 0.9164 | 0.7736 | 1.0857 | 0.3127 | 0.1324  | 0.2119 | 0.5960 | 4.2775  | 0.1178 | -1802166.6839  |
| log_g_Dickeya          | CardioEmbolicStroke | Simple mode               | 4  | 1.0419 | 0.8241 | 1.3171 | 0.7542 | 0.1324  | 0.2119 | 0.5960 | 4.2775  | 0.1178 | -1802166.6839  |
| log_g_Dickeya          | CardioEmbolicStroke | Weighted mode             | 4  | 0.9692 | 0.7848 | 1.1969 | 0.7904 | 0.1324  | 0.2119 | 0.5960 | 4.2775  | 0.1178 | -1802166.6839  |
| log_g_Dickeya          | IschemicStroke      | MR Egger                  | 4  | 1.0995 | 0.8755 | 1.3808 | 0.5002 | -0.0532 | 0.0547 | 0.4334 | 8.1179  | 0.0436 | -11934400.8623 |
| log_g_Dickeya          | IschemicStroke      | Weighted median           | 4  | 0.9695 | 0.9273 | 1.0135 | 0.1716 | -0.0532 | 0.0547 | 0.4334 | 8.1179  | 0.0436 | -11934400.8623 |
| log_g_Dickeya          | IschemicStroke      | Inverse variance weighted | 4  | 0.9845 | 0.9384 | 1.0329 | 0.5246 | -0.0532 | 0.0547 | 0.4334 | 8.1179  | 0.0436 | -11934400.8623 |
| log_g_Dickeya          | IschemicStroke      | Simple mode               | 4  | 0.9543 | 0.8949 | 1.0177 | 0.2492 | -0.0532 | 0.0547 | 0.4334 | 8.1179  | 0.0436 | -11934400.8623 |
| log_g_Dickeya          | IschemicStroke      | Weighted mode             | 4  | 0.9553 | 0.8790 | 1.0381 | 0.3595 | -0.0532 | 0.0547 | 0.4334 | 8.1179  | 0.0436 | -11934400.8623 |
| log_g_Dickeya          | LargeArteryStroke   | MR Egger                  | 4  | 0.6300 | 0.4021 | 0.9870 | 0.1812 | 0.2283  | 0.1078 | 0.1684 | 5.4587  | 0.1411 | -4377317.9117  |
| log_g_Dickeya          | LargeArteryStroke   | Weighted median           | 4  | 0.9805 | 0.8652 | 1.1112 | 0.7575 | 0.2283  | 0.1078 | 0.1684 | 5.4587  | 0.1411 | -4377317.9117  |
| log_g_Dickeya          | LargeArteryStroke   | Inverse variance weighted | 4  | 1.0120 | 0.8900 | 1.1508 | 0.8552 | 0.2283  | 0.1078 | 0.1684 | 5.4587  | 0.1411 | -4377317.9117  |
| log_g_Dickeya          | LargeArteryStroke   | Simple mode               | 4  | 0.9346 | 0.7707 | 1.1332 | 0.5409 | 0.2283  | 0.1078 | 0.1684 | 5.4587  | 0.1411 | -4377317.9117  |
| log_g_Dickeya          | LargeArteryStroke   | Weighted mode             | 4  | 0.9359 | 0.8085 | 1.0834 | 0.4403 | 0.2283  | 0.1078 | 0.1684 | 5.4587  | 0.1411 | -4377317.9117  |
| log_g_Dickeya          | SmallVesselStroke   | MR Egger                  | 4  | 1.0450 | 0.6988 | 1.5626 | 0.8502 | -0.0216 | 0.0966 | 0.8442 | 5.2120  | 0.0738 | -5258833.6721  |
| log_g_Dickeya          | SmallVesselStroke   | Weighted median           | 4  | 1.0293 | 0.9628 | 1.1003 | 0.3972 | -0.0216 | 0.0966 | 0.8442 | 5.2120  | 0.0738 | -5258833.6721  |
| log_g_Dickeya          | SmallVesselStroke   | Inverse variance weighted | 4  | 0.9992 | 0.9310 | 1.0725 | 0.9828 | -0.0216 | 0.0966 | 0.8442 | 5.2120  | 0.0738 | -5258833.6721  |
| log_g_Dickeya          | SmallVesselStroke   | Simple mode               | 4  | 1.0243 | 0.9401 | 1.1160 | 0.6215 | -0.0216 | 0.0966 | 0.8442 | 5.2120  | 0.0738 | -5258833.6721  |
| log_g_Dickeya          | SmallVesselStroke   | Weighted mode             | 4  | 1.0319 | 0.9621 | 1.1067 | 0.4445 | -0.0216 | 0.0966 | 0.8442 | 5.2120  | 0.0738 | -5258833.6721  |
| log_g_Dickeya          | Stroke              | MR Egger                  | 4  | 1.0769 | 0.9566 | 1.2125 | 0.3450 | -0.0384 | 0.0285 | 0.3101 | 2.9229  | 0.4037 | -30394745.6347 |
| log_g_Dickeya          | Stroke              | Weighted median           | 4  | 0.9934 | 0.9611 | 1.0268 | 0.6947 | -0.0384 | 0.0285 | 0.3101 | 2.9229  | 0.4037 | -30394745.6347 |
| log_g_Dickeya          | Stroke              | Inverse variance weighted | 4  | 0.9945 | 0.9698 | 1.0199 | 0.6679 | -0.0384 | 0.0285 | 0.3101 | 2.9229  | 0.4037 | -30394745.6347 |
| log_g_Dickeya          | Stroke              | Simple mode               | 4  | 0.9892 | 0.9428 | 1.0380 | 0.6887 | -0.0384 | 0.0285 | 0.3101 | 2.9229  | 0.4037 | -30394745.6347 |
| log_g_Dickeya          | Stroke              | Weighted mode             | 4  | 0.9996 | 0.9580 | 1.0429 | 0.9862 | -0.0384 | 0.0285 | 0.3101 | 2.9229  | 0.4037 | -30394745.6347 |

|                    |                     |                           |    |        |        |        |        |         |        |        |         |        |             |
|--------------------|---------------------|---------------------------|----|--------|--------|--------|--------|---------|--------|--------|---------|--------|-------------|
| log_g_Dysgonomonas | CardioEmbolicStroke | MR Egger                  | 10 | 1.0564 | 0.6685 | 1.6693 | 0.8201 | -0.0349 | 0.1063 | 0.7514 | 11.1210 | 0.1949 | -89.7240    |
| log_g_Dysgonomonas | CardioEmbolicStroke | Weighted median           | 10 | 0.9898 | 0.8695 | 1.1268 | 0.8768 | -0.0349 | 0.1063 | 0.7514 | 11.1210 | 0.1949 | -89.7240    |
| log_g_Dysgonomonas | CardioEmbolicStroke | Inverse variance weighted | 10 | 0.9806 | 0.8856 | 1.0859 | 0.7070 | -0.0349 | 0.1063 | 0.7514 | 11.1210 | 0.1949 | -89.7240    |
| log_g_Dysgonomonas | CardioEmbolicStroke | Simple mode               | 10 | 1.0086 | 0.8209 | 1.2391 | 0.9370 | -0.0349 | 0.1063 | 0.7514 | 11.1210 | 0.1949 | -89.7240    |
| log_g_Dysgonomonas | CardioEmbolicStroke | Weighted mode             | 10 | 1.0086 | 0.8164 | 1.2459 | 0.9386 | -0.0349 | 0.1063 | 0.7514 | 11.1210 | 0.1949 | -89.7240    |
| log_g_Dysgonomonas | IschemicStroke      | MR Egger                  | 12 | 1.0522 | 0.9651 | 1.1472 | 0.2755 | -0.0212 | 0.0204 | 0.3237 | 11.5573 | 0.3978 | -206.8341   |
| log_g_Dysgonomonas | IschemicStroke      | Weighted median           | 12 | 0.9993 | 0.9710 | 1.0283 | 0.9598 | -0.0212 | 0.0204 | 0.3237 | 11.5573 | 0.3978 | -206.8341   |
| log_g_Dysgonomonas | IschemicStroke      | Inverse variance weighted | 12 | 1.0064 | 0.9861 | 1.0272 | 0.5401 | -0.0212 | 0.0204 | 0.3237 | 11.5573 | 0.3978 | -206.8341   |
| log_g_Dysgonomonas | IschemicStroke      | Simple mode               | 12 | 0.9958 | 0.9542 | 1.0392 | 0.8512 | -0.0212 | 0.0204 | 0.3237 | 11.5573 | 0.3978 | -206.8341   |
| log_g_Dysgonomonas | IschemicStroke      | Weighted mode             | 12 | 0.9969 | 0.9571 | 1.0383 | 0.8825 | -0.0212 | 0.0204 | 0.3237 | 11.5573 | 0.3978 | -206.8341   |
| log_g_Dysgonomonas | LargeArteryStroke   | MR Egger                  | 10 | 1.0165 | 0.7605 | 1.3587 | 0.9149 | 0.0006  | 0.0672 | 0.9926 | 3.6887  | 0.8841 | -186.1717   |
| log_g_Dysgonomonas | LargeArteryStroke   | Weighted median           | 10 | 1.0042 | 0.9201 | 1.0959 | 0.9260 | 0.0006  | 0.0672 | 0.9926 | 3.6887  | 0.8841 | -186.1717   |
| log_g_Dysgonomonas | LargeArteryStroke   | Inverse variance weighted | 10 | 1.0179 | 0.9509 | 1.0895 | 0.6097 | 0.0006  | 0.0672 | 0.9926 | 3.6887  | 0.8841 | -186.1717   |
| log_g_Dysgonomonas | LargeArteryStroke   | Simple mode               | 10 | 1.0006 | 0.8669 | 1.1549 | 0.9938 | 0.0006  | 0.0672 | 0.9926 | 3.6887  | 0.8841 | -186.1717   |
| log_g_Dysgonomonas | LargeArteryStroke   | Weighted mode             | 10 | 1.0006 | 0.8818 | 1.1353 | 0.9930 | 0.0006  | 0.0672 | 0.9926 | 3.6887  | 0.8841 | -186.1717   |
| log_g_Dysgonomonas | SmallVesselStroke   | MR Egger                  | 10 | 0.9474 | 0.8066 | 1.1129 | 0.5292 | 0.0218  | 0.0373 | 0.5757 | 5.4584  | 0.7076 | -393.6601   |
| log_g_Dysgonomonas | SmallVesselStroke   | Weighted median           | 10 | 0.9780 | 0.9302 | 1.0283 | 0.3846 | 0.0218  | 0.0373 | 0.5757 | 5.4584  | 0.7076 | -393.6601   |
| log_g_Dysgonomonas | SmallVesselStroke   | Inverse variance weighted | 10 | 0.9926 | 0.9558 | 1.0307 | 0.6989 | 0.0218  | 0.0373 | 0.5757 | 5.4584  | 0.7076 | -393.6601   |
| log_g_Dysgonomonas | SmallVesselStroke   | Simple mode               | 10 | 0.9693 | 0.8907 | 1.0548 | 0.4882 | 0.0218  | 0.0373 | 0.5757 | 5.4584  | 0.7076 | -393.6601   |
| log_g_Dysgonomonas | SmallVesselStroke   | Weighted mode             | 10 | 0.9687 | 0.8966 | 1.0466 | 0.4412 | 0.0218  | 0.0373 | 0.5757 | 5.4584  | 0.7076 | -393.6601   |
| log_g_Dysgonomonas | Stroke              | MR Egger                  | 12 | 1.0420 | 0.9712 | 1.1180 | 0.2784 | -0.0203 | 0.0167 | 0.2527 | 9.6851  | 0.5589 | -297.2664   |
| log_g_Dysgonomonas | Stroke              | Weighted median           | 12 | 0.9937 | 0.9718 | 1.0160 | 0.5746 | -0.0203 | 0.0167 | 0.2527 | 9.6851  | 0.5589 | -297.2664   |
| log_g_Dysgonomonas | Stroke              | Inverse variance weighted | 12 | 0.9988 | 0.9823 | 1.0156 | 0.8894 | -0.0203 | 0.0167 | 0.2527 | 9.6851  | 0.5589 | -297.2664   |
| log_g_Dysgonomonas | Stroke              | Simple mode               | 12 | 0.9903 | 0.9573 | 1.0244 | 0.5844 | -0.0203 | 0.0167 | 0.2527 | 9.6851  | 0.5589 | -297.2664   |
| log_g_Dysgonomonas | Stroke              | Weighted mode             | 12 | 0.9900 | 0.9594 | 1.0214 | 0.5403 | -0.0203 | 0.0167 | 0.2527 | 9.6851  | 0.5589 | -297.2664   |
| log_g_Edwarsiella  | CardioEmbolicStroke | MR Egger                  | 6  | 1.0718 | 0.2189 | 5.2480 | 0.9359 | -0.0592 | 0.2956 | 0.8510 | 0.3184  | 0.9886 | 4108.0403   |
| log_g_Edwarsiella  | CardioEmbolicStroke | Weighted median           | 6  | 0.9087 | 0.7927 | 1.0416 | 0.1691 | -0.0592 | 0.2956 | 0.8510 | 0.3184  | 0.9886 | 4108.0403   |
| log_g_Edwarsiella  | CardioEmbolicStroke | Inverse variance weighted | 6  | 0.9115 | 0.8116 | 1.0238 | 0.1181 | -0.0592 | 0.2956 | 0.8510 | 0.3184  | 0.9886 | 4108.0403   |
| log_g_Edwarsiella  | CardioEmbolicStroke | Simple mode               | 6  | 0.8938 | 0.7426 | 1.0757 | 0.2882 | -0.0592 | 0.2956 | 0.8510 | 0.3184  | 0.9886 | 4108.0403   |
| log_g_Edwarsiella  | CardioEmbolicStroke | Weighted mode             | 6  | 0.8990 | 0.7468 | 1.0821 | 0.3115 | -0.0592 | 0.2956 | 0.8510 | 0.3184  | 0.9886 | 4108.0403   |
| log_g_Edwarsiella  | IschemicStroke      | MR Egger                  | 6  | 0.8630 | 0.5974 | 1.2467 | 0.4762 | 0.0449  | 0.0684 | 0.5473 | 3.9729  | 0.4097 | 13701.1505  |
| log_g_Edwarsiella  | IschemicStroke      | Weighted median           | 6  | 0.9758 | 0.9429 | 1.0099 | 0.1622 | 0.0449  | 0.0684 | 0.5473 | 3.9729  | 0.4097 | 13701.1505  |
| log_g_Edwarsiella  | IschemicStroke      | Inverse variance weighted | 6  | 0.9758 | 0.9501 | 1.0023 | 0.0737 | 0.0449  | 0.0684 | 0.5473 | 3.9729  | 0.4097 | 13701.1505  |
| log_g_Edwarsiella  | IschemicStroke      | Simple mode               | 6  | 0.9646 | 0.9115 | 1.0207 | 0.2668 | 0.0449  | 0.0684 | 0.5473 | 3.9729  | 0.4097 | 13701.1505  |
| log_g_Edwarsiella  | IschemicStroke      | Weighted mode             | 6  | 0.9681 | 0.9194 | 1.0193 | 0.2722 | 0.0449  | 0.0684 | 0.5473 | 3.9729  | 0.4097 | 13701.1505  |
| log_g_Edwarsiella  | LargeArteryStroke   | MR Egger                  | 6  | 0.8455 | 0.2168 | 3.2979 | 0.8210 | 0.0447  | 0.2533 | 0.8686 | 5.2669  | 0.2610 | 3592.9536   |
| log_g_Edwarsiella  | LargeArteryStroke   | Weighted median           | 6  | 0.9929 | 0.8857 | 1.1130 | 0.9027 | 0.0447  | 0.2533 | 0.8686 | 5.2669  | 0.2610 | 3592.9536   |
| log_g_Edwarsiella  | LargeArteryStroke   | Inverse variance weighted | 6  | 0.9554 | 0.8737 | 1.0446 | 0.3165 | 0.0447  | 0.2533 | 0.8686 | 5.2669  | 0.2610 | 3592.9536   |
| log_g_Edwarsiella  | LargeArteryStroke   | Simple mode               | 6  | 1.0311 | 0.8798 | 1.2083 | 0.7208 | 0.0447  | 0.2533 | 0.8686 | 5.2669  | 0.2610 | 3592.9536   |
| log_g_Edwarsiella  | LargeArteryStroke   | Weighted mode             | 6  | 1.0284 | 0.8618 | 1.2273 | 0.7685 | 0.0447  | 0.2533 | 0.8686 | 5.2669  | 0.2610 | 3592.9536   |
| log_g_Edwarsiella  | SmallVesselStroke   | MR Egger                  | 6  | 0.8181 | 0.4222 | 1.5853 | 0.5840 | 0.0719  | 0.1231 | 0.5904 | 3.7885  | 0.4354 | 9630.9713   |
| log_g_Edwarsiella  | SmallVesselStroke   | Weighted median           | 6  | 1.0064 | 0.9441 | 1.0727 | 0.8458 | 0.0719  | 0.1231 | 0.5904 | 3.7885  | 0.4354 | 9630.9713   |
| log_g_Edwarsiella  | SmallVesselStroke   | Inverse variance weighted | 6  | 0.9959 | 0.9490 | 1.0452 | 0.8684 | 0.0719  | 0.1231 | 0.5904 | 3.7885  | 0.4354 | 9630.9713   |
| log_g_Edwarsiella  | SmallVesselStroke   | Simple mode               | 6  | 1.0159 | 0.9263 | 1.1142 | 0.7507 | 0.0719  | 0.1231 | 0.5904 | 3.7885  | 0.4354 | 9630.9713   |
| log_g_Edwarsiella  | SmallVesselStroke   | Weighted mode             | 6  | 1.0173 | 0.9295 | 1.1134 | 0.7251 | 0.0719  | 0.1231 | 0.5904 | 3.7885  | 0.4354 | 9630.9713   |
| log_g_Edwarsiella  | Stroke              | MR Egger                  | 6  | 0.8908 | 0.6151 | 1.2902 | 0.5738 | 0.0383  | 0.0690 | 0.6079 | 5.6412  | 0.2276 | 17387.1703  |
| log_g_Edwarsiella  | Stroke              | Weighted median           | 6  | 0.9908 | 0.9613 | 1.0212 | 0.5496 | 0.0383  | 0.0690 | 0.6079 | 5.6412  | 0.2276 | 17387.1703  |
| log_g_Edwarsiella  | Stroke              | Inverse variance weighted | 6  | 0.9892 | 0.9648 | 1.0143 | 0.3968 | 0.0383  | 0.0690 | 0.6079 | 5.6412  | 0.2276 | 17387.1703  |
| log_g_Edwarsiella  | Stroke              | Simple mode               | 6  | 0.9702 | 0.9232 | 1.0195 | 0.2849 | 0.0383  | 0.0690 | 0.6079 | 5.6412  | 0.2276 | 17387.1703  |
| log_g_Edwarsiella  | Stroke              | Weighted mode             | 6  | 0.9725 | 0.9239 | 1.0235 | 0.3336 | 0.0383  | 0.0690 | 0.6079 | 5.6412  | 0.2276 | 17387.1703  |
| log_g_Epulopiscium | CardioEmbolicStroke | MR Egger                  | 6  | 1.2585 | 0.4012 | 3.9479 | 0.7136 | -0.1226 | 0.2259 | 0.6162 | 8.7293  | 0.0682 | -38478.2543 |
| log_g_Epulopiscium | CardioEmbolicStroke | Weighted median           | 6  | 0.9239 | 0.7869 | 1.0848 | 0.3341 | -0.1226 | 0.2259 | 0.6162 | 8.7293  | 0.0682 | -38478.2543 |
| log_g_Epulopiscium | CardioEmbolicStroke | Inverse variance weighted | 6  | 0.9205 | 0.7823 | 1.0831 | 0.3182 | -0.1226 | 0.2259 | 0.6162 | 8.7293  | 0.0682 | -38478.2543 |

|                    |                     |                           |   |        |        |        |        |         |        |        |         |        |              |
|--------------------|---------------------|---------------------------|---|--------|--------|--------|--------|---------|--------|--------|---------|--------|--------------|
| log_g_Epulopiscium | CardioEmbolicStroke | Simple mode               | 6 | 0.9320 | 0.7085 | 1.2261 | 0.6362 | -0.1226 | 0.2259 | 0.6162 | 8.7293  | 0.0682 | -38478.2543  |
| log_g_Epulopiscium | CardioEmbolicStroke | Weighted mode             | 6 | 0.9187 | 0.7166 | 1.1777 | 0.5329 | -0.1226 | 0.2259 | 0.6162 | 8.7293  | 0.0682 | -38478.2543  |
| log_g_Epulopiscium | IschemicStroke      | MR Egger                  | 7 | 0.9728 | 0.9029 | 1.0482 | 0.5015 | 0.0122  | 0.0162 | 0.4863 | 1.9405  | 0.8573 | -652.0265    |
| log_g_Epulopiscium | IschemicStroke      | Weighted median           | 7 | 1.0062 | 0.9762 | 1.0372 | 0.6871 | 0.0122  | 0.0162 | 0.4863 | 1.9405  | 0.8573 | -652.0265    |
| log_g_Epulopiscium | IschemicStroke      | Inverse variance weighted | 7 | 0.9994 | 0.9752 | 1.0243 | 0.9646 | 0.0122  | 0.0162 | 0.4863 | 1.9405  | 0.8573 | -652.0265    |
| log_g_Epulopiscium | IschemicStroke      | Simple mode               | 7 | 1.0084 | 0.9632 | 1.0558 | 0.7323 | 0.0122  | 0.0162 | 0.4863 | 1.9405  | 0.8573 | -652.0265    |
| log_g_Epulopiscium | IschemicStroke      | Weighted mode             | 7 | 1.0083 | 0.9605 | 1.0583 | 0.7509 | 0.0122  | 0.0162 | 0.4863 | 1.9405  | 0.8573 | -652.0265    |
| log_g_Epulopiscium | LargeArteryStroke   | MR Egger                  | 6 | 0.7138 | 0.4005 | 1.2721 | 0.3166 | 0.1073  | 0.1142 | 0.4006 | 3.1526  | 0.5326 | -56606.8507  |
| log_g_Epulopiscium | LargeArteryStroke   | Weighted median           | 6 | 0.9499 | 0.8497 | 1.0619 | 0.3658 | 0.1073  | 0.1142 | 0.4006 | 3.1526  | 0.5326 | -56606.8507  |
| log_g_Epulopiscium | LargeArteryStroke   | Inverse variance weighted | 6 | 0.9386 | 0.8590 | 1.0256 | 0.1610 | 0.1073  | 0.1142 | 0.4006 | 3.1526  | 0.5326 | -56606.8507  |
| log_g_Epulopiscium | LargeArteryStroke   | Simple mode               | 6 | 0.9374 | 0.7808 | 1.1254 | 0.5189 | 0.1073  | 0.1142 | 0.4006 | 3.1526  | 0.5326 | -56606.8507  |
| log_g_Epulopiscium | LargeArteryStroke   | Weighted mode             | 6 | 0.9419 | 0.8055 | 1.1015 | 0.4874 | 0.1073  | 0.1142 | 0.4006 | 3.1526  | 0.5326 | -56606.8507  |
| log_g_Epulopiscium | SmallVesselStroke   | MR Egger                  | 6 | 1.0339 | 0.7532 | 1.4193 | 0.8465 | 0.0109  | 0.0628 | 0.8704 | 3.4952  | 0.4786 | -118103.6218 |
| log_g_Epulopiscium | SmallVesselStroke   | Weighted median           | 6 | 1.0681 | 1.0052 | 1.1350 | 0.0335 | 0.0109  | 0.0628 | 0.8704 | 3.4952  | 0.4786 | -118103.6218 |
| log_g_Epulopiscium | SmallVesselStroke   | Inverse variance weighted | 6 | 1.0630 | 1.0122 | 1.1164 | 0.0144 | 0.0109  | 0.0628 | 0.8704 | 3.4952  | 0.4786 | -118103.6218 |
| log_g_Epulopiscium | SmallVesselStroke   | Simple mode               | 6 | 1.0796 | 0.9827 | 1.1862 | 0.1714 | 0.0109  | 0.0628 | 0.8704 | 3.4952  | 0.4786 | -118103.6218 |
| log_g_Epulopiscium | SmallVesselStroke   | Weighted mode             | 6 | 1.0767 | 0.9828 | 1.1795 | 0.1733 | 0.0109  | 0.0628 | 0.8704 | 3.4952  | 0.4786 | -118103.6218 |
| log_g_Epulopiscium | Stroke              | MR Egger                  | 9 | 0.9957 | 0.9345 | 1.0609 | 0.8969 | 0.0047  | 0.0139 | 0.7436 | 7.2188  | 0.4065 | -383.8880    |
| log_g_Epulopiscium | Stroke              | Weighted median           | 9 | 1.0109 | 0.9835 | 1.0391 | 0.4395 | 0.0047  | 0.0139 | 0.7436 | 7.2188  | 0.4065 | -383.8880    |
| log_g_Epulopiscium | Stroke              | Inverse variance weighted | 9 | 1.0061 | 0.9864 | 1.0263 | 0.5469 | 0.0047  | 0.0139 | 0.7436 | 7.2188  | 0.4065 | -383.8880    |
| log_g_Epulopiscium | Stroke              | Simple mode               | 9 | 1.0123 | 0.9710 | 1.0554 | 0.5808 | 0.0047  | 0.0139 | 0.7436 | 7.2188  | 0.4065 | -383.8880    |
| log_g_Epulopiscium | Stroke              | Weighted mode             | 9 | 1.0116 | 0.9770 | 1.0474 | 0.5352 | 0.0047  | 0.0139 | 0.7436 | 7.2188  | 0.4065 | -383.8880    |
| log_g_Eremococcus  | CardioEmbolicStroke | MR Egger                  | 8 | 1.1297 | 0.6191 | 2.0616 | 0.7048 | -0.0645 | 0.1336 | 0.6465 | 6.8984  | 0.3303 | -262.2190    |
| log_g_Eremococcus  | CardioEmbolicStroke | Weighted median           | 8 | 1.0465 | 0.9103 | 1.2032 | 0.5226 | -0.0645 | 0.1336 | 0.6465 | 6.8984  | 0.3303 | -262.2190    |
| log_g_Eremococcus  | CardioEmbolicStroke | Inverse variance weighted | 8 | 0.9766 | 0.8811 | 1.0825 | 0.6524 | -0.0645 | 0.1336 | 0.6465 | 6.8984  | 0.3303 | -262.2190    |
| log_g_Eremococcus  | CardioEmbolicStroke | Simple mode               | 8 | 1.0731 | 0.8395 | 1.3718 | 0.5908 | -0.0645 | 0.1336 | 0.6465 | 6.8984  | 0.3303 | -262.2190    |
| log_g_Eremococcus  | CardioEmbolicStroke | Weighted mode             | 8 | 1.0835 | 0.8412 | 1.3955 | 0.5543 | -0.0645 | 0.1336 | 0.6465 | 6.8984  | 0.3303 | -262.2190    |
| log_g_Eremococcus  | IschemicStroke      | MR Egger                  | 8 | 0.9568 | 0.7983 | 1.1467 | 0.6495 | 0.0231  | 0.0403 | 0.5866 | 12.1138 | 0.0595 | -747.7672    |
| log_g_Eremococcus  | IschemicStroke      | Weighted median           | 8 | 0.9960 | 0.9637 | 1.0295 | 0.8131 | 0.0231  | 0.0403 | 0.5866 | 12.1138 | 0.0595 | -747.7672    |
| log_g_Eremococcus  | IschemicStroke      | Inverse variance weighted | 8 | 1.0080 | 0.9769 | 1.0402 | 0.6172 | 0.0231  | 0.0403 | 0.5866 | 12.1138 | 0.0595 | -747.7672    |
| log_g_Eremococcus  | IschemicStroke      | Simple mode               | 8 | 0.9809 | 0.9275 | 1.0375 | 0.5223 | 0.0231  | 0.0403 | 0.5866 | 12.1138 | 0.0595 | -747.7672    |
| log_g_Eremococcus  | IschemicStroke      | Weighted mode             | 8 | 0.9803 | 0.9316 | 1.0317 | 0.4707 | 0.0231  | 0.0403 | 0.5866 | 12.1138 | 0.0595 | -747.7672    |
| log_g_Eremococcus  | LargeArteryStroke   | MR Egger                  | 8 | 0.8391 | 0.5538 | 1.2714 | 0.4396 | 0.0797  | 0.0924 | 0.4212 | 4.1723  | 0.6534 | -407.6298    |
| log_g_Eremococcus  | LargeArteryStroke   | Weighted median           | 8 | 0.9945 | 0.9001 | 1.0987 | 0.9133 | 0.0797  | 0.0924 | 0.4212 | 4.1723  | 0.6534 | -407.6298    |
| log_g_Eremococcus  | LargeArteryStroke   | Inverse variance weighted | 8 | 1.0045 | 0.9315 | 1.0833 | 0.9070 | 0.0797  | 0.0924 | 0.4212 | 4.1723  | 0.6534 | -407.6298    |
| log_g_Eremococcus  | LargeArteryStroke   | Simple mode               | 8 | 1.0063 | 0.8599 | 1.1775 | 0.9402 | 0.0797  | 0.0924 | 0.4212 | 4.1723  | 0.6534 | -407.6298    |
| log_g_Eremococcus  | LargeArteryStroke   | Weighted mode             | 8 | 0.9789 | 0.8355 | 1.1469 | 0.7992 | 0.0797  | 0.0924 | 0.4212 | 4.1723  | 0.6534 | -407.6298    |
| log_g_Eremococcus  | SmallVesselStroke   | MR Egger                  | 8 | 1.0441 | 0.7414 | 1.4704 | 0.8131 | -0.0026 | 0.0760 | 0.9733 | 12.7956 | 0.0464 | -339.8858    |
| log_g_Eremococcus  | SmallVesselStroke   | Weighted median           | 8 | 1.0290 | 0.9655 | 1.0967 | 0.3794 | -0.0026 | 0.0760 | 0.9733 | 12.7956 | 0.0464 | -339.8858    |
| log_g_Eremococcus  | SmallVesselStroke   | Inverse variance weighted | 8 | 1.0379 | 0.9802 | 1.0989 | 0.2026 | -0.0026 | 0.0760 | 0.9733 | 12.7956 | 0.0464 | -339.8858    |
| log_g_Eremococcus  | SmallVesselStroke   | Simple mode               | 8 | 1.0937 | 0.9727 | 1.2297 | 0.1780 | -0.0026 | 0.0760 | 0.9733 | 12.7956 | 0.0464 | -339.8858    |
| log_g_Eremococcus  | SmallVesselStroke   | Weighted mode             | 8 | 1.0603 | 0.9455 | 1.1891 | 0.3501 | -0.0026 | 0.0760 | 0.9733 | 12.7956 | 0.0464 | -339.8858    |
| log_g_Eremococcus  | Stroke              | MR Egger                  | 8 | 0.9035 | 0.7966 | 1.0247 | 0.1651 | 0.0479  | 0.0282 | 0.1410 | 12.6146 | 0.0821 | -1168.5227   |
| log_g_Eremococcus  | Stroke              | Weighted median           | 8 | 0.9959 | 0.9679 | 1.0247 | 0.7797 | 0.0479  | 0.0282 | 0.1410 | 12.6146 | 0.0821 | -1168.5227   |
| log_g_Eremococcus  | Stroke              | Inverse variance weighted | 8 | 1.0055 | 0.9794 | 1.0323 | 0.6826 | 0.0479  | 0.0282 | 0.1410 | 12.6146 | 0.0821 | -1168.5227   |
| log_g_Eremococcus  | Stroke              | Simple mode               | 8 | 0.9897 | 0.9462 | 1.0352 | 0.6649 | 0.0479  | 0.0282 | 0.1410 | 12.6146 | 0.0821 | -1168.5227   |
| log_g_Eremococcus  | Stroke              | Weighted mode             | 8 | 0.9902 | 0.9510 | 1.0309 | 0.6457 | 0.0479  | 0.0282 | 0.1410 | 12.6146 | 0.0821 | -1168.5227   |
| log_g_Erwinia      | CardioEmbolicStroke | MR Egger                  | 5 | 1.0248 | 0.7384 | 1.4222 | 0.8929 | -0.0553 | 0.0788 | 0.5333 | 0.8531  | 0.8367 | -2253.0523   |
| log_g_Erwinia      | CardioEmbolicStroke | Weighted median           | 5 | 0.9409 | 0.8235 | 1.0750 | 0.3701 | -0.0553 | 0.0788 | 0.5333 | 0.8531  | 0.8367 | -2253.0523   |
| log_g_Erwinia      | CardioEmbolicStroke | Inverse variance weighted | 5 | 0.9170 | 0.8256 | 1.0184 | 0.1052 | -0.0553 | 0.0788 | 0.5333 | 0.8531  | 0.8367 | -2253.0523   |
| log_g_Erwinia      | CardioEmbolicStroke | Simple mode               | 5 | 0.9343 | 0.7834 | 1.1142 | 0.4914 | -0.0553 | 0.0788 | 0.5333 | 0.8531  | 0.8367 | -2253.0523   |
| log_g_Erwinia      | CardioEmbolicStroke | Weighted mode             | 5 | 0.9458 | 0.8156 | 1.0967 | 0.5014 | -0.0553 | 0.0788 | 0.5333 | 0.8531  | 0.8367 | -2253.0523   |
| log_g_Erwinia      | IschemicStroke      | MR Egger                  | 7 | 1.0078 | 0.9491 | 1.0702 | 0.8091 | -0.0029 | 0.0156 | 0.8602 | 5.0391  | 0.4111 | -759.4009    |

|                      |                     |                           |    |        |        |        |        |         |        |        |         |        |           |
|----------------------|---------------------|---------------------------|----|--------|--------|--------|--------|---------|--------|--------|---------|--------|-----------|
| log_g_Erwinia        | IschemicStroke      | Weighted median           | 7  | 1.0064 | 0.9775 | 1.0361 | 0.6691 | -0.0029 | 0.0156 | 0.8602 | 5.0391  | 0.4111 | -759.4009 |
| log_g_Erwinia        | IschemicStroke      | Inverse variance weighted | 7  | 1.0025 | 0.9811 | 1.0244 | 0.8203 | -0.0029 | 0.0156 | 0.8602 | 5.0391  | 0.4111 | -759.4009 |
| log_g_Erwinia        | IschemicStroke      | Simple mode               | 7  | 1.0048 | 0.9629 | 1.0484 | 0.8343 | -0.0029 | 0.0156 | 0.8602 | 5.0391  | 0.4111 | -759.4009 |
| log_g_Erwinia        | IschemicStroke      | Weighted mode             | 7  | 1.0149 | 0.9784 | 1.0527 | 0.4591 | -0.0029 | 0.0156 | 0.8602 | 5.0391  | 0.4111 | -759.4009 |
| log_g_Erwinia        | LargeArteryStroke   | MR Egger                  | 7  | 1.0815 | 0.8918 | 1.3116 | 0.4620 | -0.0081 | 0.0503 | 0.8790 | 4.2500  | 0.5140 | -58.4481  |
| log_g_Erwinia        | LargeArteryStroke   | Weighted median           | 7  | 1.0327 | 0.9437 | 1.1301 | 0.4843 | -0.0081 | 0.0503 | 0.8790 | 4.2500  | 0.5140 | -58.4481  |
| log_g_Erwinia        | LargeArteryStroke   | Inverse variance weighted | 7  | 1.0657 | 0.9940 | 1.1426 | 0.0733 | -0.0081 | 0.0503 | 0.8790 | 4.2500  | 0.5140 | -58.4481  |
| log_g_Erwinia        | LargeArteryStroke   | Simple mode               | 7  | 1.0279 | 0.9137 | 1.1564 | 0.6627 | -0.0081 | 0.0503 | 0.8790 | 4.2500  | 0.5140 | -58.4481  |
| log_g_Erwinia        | LargeArteryStroke   | Weighted mode             | 7  | 1.0220 | 0.9209 | 1.1341 | 0.6966 | -0.0081 | 0.0503 | 0.8790 | 4.2500  | 0.5140 | -58.4481  |
| log_g_Erwinia        | SmallVesselStroke   | MR Egger                  | 7  | 0.9946 | 0.8898 | 1.1117 | 0.9276 | -0.0063 | 0.0290 | 0.8366 | 5.3753  | 0.3718 | -295.9077 |
| log_g_Erwinia        | SmallVesselStroke   | Weighted median           | 7  | 0.9790 | 0.9280 | 1.0327 | 0.4354 | -0.0063 | 0.0290 | 0.8366 | 5.3753  | 0.3718 | -295.9077 |
| log_g_Erwinia        | SmallVesselStroke   | Inverse variance weighted | 7  | 0.9832 | 0.9458 | 1.0221 | 0.3925 | -0.0063 | 0.0290 | 0.8366 | 5.3753  | 0.3718 | -295.9077 |
| log_g_Erwinia        | SmallVesselStroke   | Simple mode               | 7  | 0.9692 | 0.8962 | 1.0483 | 0.4645 | -0.0063 | 0.0290 | 0.8366 | 5.3753  | 0.3718 | -295.9077 |
| log_g_Erwinia        | SmallVesselStroke   | Weighted mode             | 7  | 0.9758 | 0.9144 | 1.0413 | 0.4879 | -0.0063 | 0.0290 | 0.8366 | 5.3753  | 0.3718 | -295.9077 |
| log_g_Erwinia        | Stroke              | MR Egger                  | 8  | 1.0144 | 0.9566 | 1.0756 | 0.6504 | -0.0067 | 0.0149 | 0.6693 | 7.5721  | 0.2712 | -687.0832 |
| log_g_Erwinia        | Stroke              | Weighted median           | 8  | 1.0067 | 0.9818 | 1.0322 | 0.6026 | -0.0067 | 0.0149 | 0.6693 | 7.5721  | 0.2712 | -687.0832 |
| log_g_Erwinia        | Stroke              | Inverse variance weighted | 8  | 1.0017 | 0.9823 | 1.0215 | 0.8643 | -0.0067 | 0.0149 | 0.6693 | 7.5721  | 0.2712 | -687.0832 |
| log_g_Erwinia        | Stroke              | Simple mode               | 8  | 1.0066 | 0.9708 | 1.0437 | 0.7331 | -0.0067 | 0.0149 | 0.6693 | 7.5721  | 0.2712 | -687.0832 |
| log_g_Erwinia        | Stroke              | Weighted mode             | 8  | 1.0089 | 0.9773 | 1.0414 | 0.6030 | -0.0067 | 0.0149 | 0.6693 | 7.5721  | 0.2712 | -687.0832 |
| log_g_Ethanoligenens | CardioEmbolicStroke | MR Egger                  | 10 | 1.1402 | 0.6241 | 2.0833 | 0.6808 | -0.0465 | 0.1248 | 0.7189 | 10.4686 | 0.2337 | -174.9337 |
| log_g_Ethanoligenens | CardioEmbolicStroke | Weighted median           | 10 | 0.9478 | 0.8367 | 1.0737 | 0.3996 | -0.0465 | 0.1248 | 0.7189 | 10.4686 | 0.2337 | -174.9337 |
| log_g_Ethanoligenens | CardioEmbolicStroke | Inverse variance weighted | 10 | 1.0183 | 0.9260 | 1.1197 | 0.7082 | -0.0465 | 0.1248 | 0.7189 | 10.4686 | 0.2337 | -174.9337 |
| log_g_Ethanoligenens | CardioEmbolicStroke | Simple mode               | 10 | 0.9238 | 0.7530 | 1.1334 | 0.4668 | -0.0465 | 0.1248 | 0.7189 | 10.4686 | 0.2337 | -174.9337 |
| log_g_Ethanoligenens | CardioEmbolicStroke | Weighted mode             | 10 | 0.9253 | 0.7607 | 1.1255 | 0.4572 | -0.0465 | 0.1248 | 0.7189 | 10.4686 | 0.2337 | -174.9337 |
| log_g_Ethanoligenens | IschemicStroke      | MR Egger                  | 12 | 1.0010 | 0.9467 | 1.0584 | 0.9720 | -0.0107 | 0.0128 | 0.4218 | 5.4940  | 0.8558 | -256.9003 |
| log_g_Ethanoligenens | IschemicStroke      | Weighted median           | 12 | 0.9770 | 0.9535 | 1.0010 | 0.0606 | -0.0107 | 0.0128 | 0.4218 | 5.4940  | 0.8558 | -256.9003 |
| log_g_Ethanoligenens | IschemicStroke      | Inverse variance weighted | 12 | 0.9787 | 0.9612 | 0.9965 | 0.0190 | -0.0107 | 0.0128 | 0.4218 | 5.4940  | 0.8558 | -256.9003 |
| log_g_Ethanoligenens | IschemicStroke      | Simple mode               | 12 | 0.9724 | 0.9372 | 1.0089 | 0.1646 | -0.0107 | 0.0128 | 0.4218 | 5.4940  | 0.8558 | -256.9003 |
| log_g_Ethanoligenens | IschemicStroke      | Weighted mode             | 12 | 0.9773 | 0.9435 | 1.0123 | 0.2275 | -0.0107 | 0.0128 | 0.4218 | 5.4940  | 0.8558 | -256.9003 |
| log_g_Ethanoligenens | LargeArteryStroke   | MR Egger                  | 11 | 0.9908 | 0.7130 | 1.3767 | 0.9571 | 0.0010  | 0.0699 | 0.9892 | 11.0270 | 0.2739 | -92.2383  |
| log_g_Ethanoligenens | LargeArteryStroke   | Weighted median           | 11 | 1.0176 | 0.9324 | 1.1106 | 0.6961 | 0.0010  | 0.0699 | 0.9892 | 11.0270 | 0.2739 | -92.2383  |
| log_g_Ethanoligenens | LargeArteryStroke   | Inverse variance weighted | 11 | 0.9930 | 0.9291 | 1.0613 | 0.8364 | 0.0010  | 0.0699 | 0.9892 | 11.0270 | 0.2739 | -92.2383  |
| log_g_Ethanoligenens | LargeArteryStroke   | Simple mode               | 11 | 1.0102 | 0.8548 | 1.1938 | 0.9078 | 0.0010  | 0.0699 | 0.9892 | 11.0270 | 0.2739 | -92.2383  |
| log_g_Ethanoligenens | LargeArteryStroke   | Weighted mode             | 11 | 1.0305 | 0.8777 | 1.2099 | 0.7212 | 0.0010  | 0.0699 | 0.9892 | 11.0270 | 0.2739 | -92.2383  |
| log_g_Ethanoligenens | SmallVesselStroke   | MR Egger                  | 12 | 0.0163 | 0.9131 | 1.1310 | 0.7738 | -0.0189 | 0.0245 | 0.4572 | 11.3180 | 0.3333 | -107.7940 |
| log_g_Ethanoligenens | SmallVesselStroke   | Weighted median           | 12 | 0.9722 | 0.9297 | 1.0166 | 0.2159 | -0.0189 | 0.0245 | 0.4572 | 11.3180 | 0.3333 | -107.7940 |
| log_g_Ethanoligenens | SmallVesselStroke   | Inverse variance weighted | 12 | 0.9764 | 0.9440 | 1.0100 | 0.1666 | -0.0189 | 0.0245 | 0.4572 | 11.3180 | 0.3333 | -107.7940 |
| log_g_Ethanoligenens | SmallVesselStroke   | Simple mode               | 12 | 0.9729 | 0.9055 | 1.0454 | 0.4698 | -0.0189 | 0.0245 | 0.4572 | 11.3180 | 0.3333 | -107.7940 |
| log_g_Ethanoligenens | SmallVesselStroke   | Weighted mode             | 12 | 0.9723 | 0.9099 | 1.0389 | 0.4232 | -0.0189 | 0.0245 | 0.4572 | 11.3180 | 0.3333 | -107.7940 |
| log_g_Ethanoligenens | Stroke              | MR Egger                  | 12 | 0.9916 | 0.9455 | 1.0400 | 0.7363 | -0.0032 | 0.0109 | 0.7731 | 7.2030  | 0.7061 | -302.8966 |
| log_g_Ethanoligenens | Stroke              | Weighted median           | 12 | 0.9790 | 0.9587 | 0.9998 | 0.0476 | -0.0032 | 0.0109 | 0.7731 | 7.2030  | 0.7061 | -302.8966 |
| log_g_Ethanoligenens | Stroke              | Inverse variance weighted | 12 | 0.9849 | 0.9699 | 1.0001 | 0.0510 | -0.0032 | 0.0109 | 0.7731 | 7.2030  | 0.7061 | -302.8966 |
| log_g_Ethanoligenens | Stroke              | Simple mode               | 12 | 0.9729 | 0.9415 | 1.0054 | 0.1297 | -0.0032 | 0.0109 | 0.7731 | 7.2030  | 0.7061 | -302.8966 |
| log_g_Ethanoligenens | Stroke              | Weighted mode             | 12 | 0.9747 | 0.9458 | 1.0046 | 0.1245 | -0.0032 | 0.0109 | 0.7731 | 7.2030  | 0.7061 | -302.8966 |
| log_g_Filifactor     | CardioEmbolicStroke | MR Egger                  | 6  | 0.7622 | 0.4945 | 1.1748 | 0.2861 | 0.0723  | 0.0943 | 0.4859 | 4.5088  | 0.3415 | -326.8978 |
| log_g_Filifactor     | CardioEmbolicStroke | Weighted median           | 6  | 0.8458 | 0.7250 | 0.9867 | 0.0332 | 0.0723  | 0.0943 | 0.4859 | 4.5088  | 0.3415 | -326.8978 |
| log_g_Filifactor     | CardioEmbolicStroke | Inverse variance weighted | 6  | 0.8970 | 0.8009 | 1.0046 | 0.0601 | 0.0723  | 0.0943 | 0.4859 | 4.5088  | 0.3415 | -326.8978 |
| log_g_Filifactor     | CardioEmbolicStroke | Simple mode               | 6  | 0.8213 | 0.6701 | 1.0068 | 0.1166 | 0.0723  | 0.0943 | 0.4859 | 4.5088  | 0.3415 | -326.8978 |
| log_g_Filifactor     | CardioEmbolicStroke | Weighted mode             | 6  | 0.8294 | 0.6797 | 1.0121 | 0.1249 | 0.0723  | 0.0943 | 0.4859 | 4.5088  | 0.3415 | -326.8978 |
| log_g_Filifactor     | IschemicStroke      | MR Egger                  | 7  | 0.9784 | 0.8868 | 1.0794 | 0.6811 | 0.0063  | 0.0217 | 0.7830 | 6.1427  | 0.2926 | -826.8895 |
| log_g_Filifactor     | IschemicStroke      | Weighted median           | 7  | 0.9952 | 0.9633 | 1.0282 | 0.7729 | 0.0063  | 0.0217 | 0.7830 | 6.1427  | 0.2926 | -826.8895 |
| log_g_Filifactor     | IschemicStroke      | Inverse variance weighted | 7  | 0.9922 | 0.9671 | 1.0179 | 0.5465 | 0.0063  | 0.0217 | 0.7830 | 6.1427  | 0.2926 | -826.8895 |
| log_g_Filifactor     | IschemicStroke      | Simple mode               | 7  | 1.0024 | 0.9635 | 1.0429 | 0.9093 | 0.0063  | 0.0217 | 0.7830 | 6.1427  | 0.2926 | -826.8895 |

|                   |                     |                           |    |        |        |        |        |         |        |        |         |        |            |
|-------------------|---------------------|---------------------------|----|--------|--------|--------|--------|---------|--------|--------|---------|--------|------------|
| log_g_Filifactor  | IschemicStroke      | Weighted mode             | 7  | 1.0015 | 0.9602 | 1.0445 | 0.9476 | 0.0063  | 0.0217 | 0.7830 | 6.1427  | 0.2926 | -826.8895  |
| log_g_Filifactor  | LargeArteryStroke   | MR Egger                  | 6  | 0.8696 | 0.6400 | 1.1817 | 0.4223 | 0.0695  | 0.0667 | 0.3565 | 3.5473  | 0.6162 | -760.1264  |
| log_g_Filifactor  | LargeArteryStroke   | Weighted median           | 6  | 1.0198 | 0.9156 | 1.1357 | 0.7218 | 0.0695  | 0.0667 | 0.3565 | 3.5473  | 0.6162 | -760.1264  |
| log_g_Filifactor  | LargeArteryStroke   | Inverse variance weighted | 6  | 1.0172 | 0.9358 | 1.1057 | 0.6882 | 0.0695  | 0.0667 | 0.3565 | 3.5473  | 0.6162 | -760.1264  |
| log_g_Filifactor  | LargeArteryStroke   | Simple mode               | 6  | 1.0532 | 0.8942 | 1.2405 | 0.5617 | 0.0695  | 0.0667 | 0.3565 | 3.5473  | 0.6162 | -760.1264  |
| log_g_Filifactor  | LargeArteryStroke   | Weighted mode             | 6  | 1.0532 | 0.9018 | 1.2301 | 0.5414 | 0.0695  | 0.0667 | 0.3565 | 3.5473  | 0.6162 | -760.1264  |
| log_g_Filifactor  | SmallVesselStroke   | MR Egger                  | 6  | 1.0187 | 0.8592 | 1.2079 | 0.8413 | -0.0116 | 0.0371 | 0.7700 | 1.8831  | 0.7573 | -2616.7398 |
| log_g_Filifactor  | SmallVesselStroke   | Weighted median           | 6  | 0.9873 | 0.9347 | 1.0429 | 0.6472 | -0.0116 | 0.0371 | 0.7700 | 1.8831  | 0.7573 | -2616.7398 |
| log_g_Filifactor  | SmallVesselStroke   | Inverse variance weighted | 6  | 0.9924 | 0.9476 | 1.0394 | 0.7472 | -0.0116 | 0.0371 | 0.7700 | 1.8831  | 0.7573 | -2616.7398 |
| log_g_Filifactor  | SmallVesselStroke   | Simple mode               | 6  | 0.9737 | 0.8930 | 1.0617 | 0.5726 | -0.0116 | 0.0371 | 0.7700 | 1.8831  | 0.7573 | -2616.7398 |
| log_g_Filifactor  | SmallVesselStroke   | Weighted mode             | 6  | 0.9786 | 0.9032 | 1.0602 | 0.6190 | -0.0116 | 0.0371 | 0.7700 | 1.8831  | 0.7573 | -2616.7398 |
| log_g_Filifactor  | Stroke              | MR Egger                  | 8  | 0.9899 | 0.9225 | 1.0622 | 0.7869 | 0.0016  | 0.0159 | 0.9238 | 2.3400  | 0.8859 | -500.0271  |
| log_g_Filifactor  | Stroke              | Weighted median           | 8  | 0.9940 | 0.9689 | 1.0197 | 0.6439 | 0.0016  | 0.0159 | 0.9238 | 2.3400  | 0.8859 | -500.0271  |
| log_g_Filifactor  | Stroke              | Inverse variance weighted | 8  | 0.9933 | 0.9727 | 1.0143 | 0.5289 | 0.0016  | 0.0159 | 0.9238 | 2.3400  | 0.8859 | -500.0271  |
| log_g_Filifactor  | Stroke              | Simple mode               | 8  | 0.9760 | 0.9416 | 1.0116 | 0.2248 | 0.0016  | 0.0159 | 0.9238 | 2.3400  | 0.8859 | -500.0271  |
| log_g_Filifactor  | Stroke              | Weighted mode             | 8  | 1.0075 | 0.9724 | 1.0439 | 0.6929 | 0.0016  | 0.0159 | 0.9238 | 2.3400  | 0.8859 | -500.0271  |
| log_g_Finegoldia  | CardioEmbolicStroke | MR Egger                  | 14 | 0.8590 | 0.6478 | 1.1392 | 0.3121 | 0.0564  | 0.0659 | 0.4087 | 13.7592 | 0.3164 | -31.5603   |
| log_g_Finegoldia  | CardioEmbolicStroke | Weighted median           | 14 | 0.9580 | 0.8685 | 1.0568 | 0.3914 | 0.0564  | 0.0659 | 0.4087 | 13.7592 | 0.3164 | -31.5603   |
| log_g_Finegoldia  | CardioEmbolicStroke | Inverse variance weighted | 14 | 0.9673 | 0.8968 | 1.0433 | 0.3885 | 0.0564  | 0.0659 | 0.4087 | 13.7592 | 0.3164 | -31.5603   |
| log_g_Finegoldia  | CardioEmbolicStroke | Simple mode               | 14 | 0.9049 | 0.7610 | 1.0760 | 0.2785 | 0.0564  | 0.0659 | 0.4087 | 13.7592 | 0.3164 | -31.5603   |
| log_g_Finegoldia  | CardioEmbolicStroke | Weighted mode             | 14 | 0.9049 | 0.7615 | 1.0753 | 0.2767 | 0.0564  | 0.0659 | 0.4087 | 13.7592 | 0.3164 | -31.5603   |
| log_g_Finegoldia  | IschemicStroke      | MR Egger                  | 17 | 0.9933 | 0.9445 | 1.0447 | 0.7975 | 0.0007  | 0.0123 | 0.9560 | 11.5203 | 0.7149 | -138.5006  |
| log_g_Finegoldia  | IschemicStroke      | Weighted median           | 17 | 0.9984 | 0.9774 | 1.0199 | 0.8845 | 0.0007  | 0.0123 | 0.9560 | 11.5203 | 0.7149 | -138.5006  |
| log_g_Finegoldia  | IschemicStroke      | Inverse variance weighted | 17 | 0.9947 | 0.9793 | 1.0102 | 0.4997 | 0.0007  | 0.0123 | 0.9560 | 11.5203 | 0.7149 | -138.5006  |
| log_g_Finegoldia  | IschemicStroke      | Simple mode               | 17 | 0.9984 | 0.9639 | 1.0341 | 0.9304 | 0.0007  | 0.0123 | 0.9560 | 11.5203 | 0.7149 | -138.5006  |
| log_g_Finegoldia  | IschemicStroke      | Weighted mode             | 17 | 0.9952 | 0.9616 | 1.0299 | 0.7850 | 0.0007  | 0.0123 | 0.9560 | 11.5203 | 0.7149 | -138.5006  |
| log_g_Finegoldia  | LargeArteryStroke   | MR Egger                  | 16 | 0.7987 | 0.6623 | 0.9633 | 0.0339 | 0.1092  | 0.0447 | 0.0284 | 21.2467 | 0.1291 | -12.1388   |
| log_g_Finegoldia  | LargeArteryStroke   | Weighted median           | 16 | 0.9876 | 0.9167 | 1.0640 | 0.7425 | 0.1092  | 0.0447 | 0.0284 | 21.2467 | 0.1291 | -12.1388   |
| log_g_Finegoldia  | LargeArteryStroke   | Inverse variance weighted | 16 | 0.9991 | 0.9393 | 1.0627 | 0.9778 | 0.1092  | 0.0447 | 0.0284 | 21.2467 | 0.1291 | -12.1388   |
| log_g_Finegoldia  | LargeArteryStroke   | Simple mode               | 16 | 1.0038 | 0.8841 | 1.1397 | 0.9539 | 0.1092  | 0.0447 | 0.0284 | 21.2467 | 0.1291 | -12.1388   |
| log_g_Finegoldia  | LargeArteryStroke   | Weighted mode             | 16 | 0.9725 | 0.8650 | 1.0934 | 0.6480 | 0.1092  | 0.0447 | 0.0284 | 21.2467 | 0.1291 | -12.1388   |
| log_g_Finegoldia  | SmallVesselStroke   | MR Egger                  | 17 | 1.0629 | 0.9701 | 1.1645 | 0.2102 | -0.0376 | 0.0222 | 0.1118 | 14.0606 | 0.5942 | -56.5832   |
| log_g_Finegoldia  | SmallVesselStroke   | Weighted median           | 17 | 0.9914 | 0.9534 | 1.0309 | 0.6645 | -0.0376 | 0.0222 | 0.1118 | 14.0606 | 0.5942 | -56.5832   |
| log_g_Finegoldia  | SmallVesselStroke   | Inverse variance weighted | 17 | 0.9862 | 0.9589 | 1.0142 | 0.3300 | -0.0376 | 0.0222 | 0.1118 | 14.0606 | 0.5942 | -56.5832   |
| log_g_Finegoldia  | SmallVesselStroke   | Simple mode               | 17 | 0.9989 | 0.9347 | 1.0674 | 0.9734 | -0.0376 | 0.0222 | 0.1118 | 14.0606 | 0.5942 | -56.5832   |
| log_g_Finegoldia  | SmallVesselStroke   | Weighted mode             | 17 | 0.9957 | 0.9343 | 1.0610 | 0.8952 | -0.0376 | 0.0222 | 0.1118 | 14.0606 | 0.5942 | -56.5832   |
| log_g_Finegoldia  | Stroke              | MR Egger                  | 17 | 0.9828 | 0.9384 | 1.0293 | 0.4738 | 0.0073  | 0.0113 | 0.5296 | 18.0280 | 0.2612 | -139.3248  |
| log_g_Finegoldia  | Stroke              | Weighted median           | 17 | 0.9923 | 0.9729 | 1.0121 | 0.4420 | 0.0073  | 0.0113 | 0.5296 | 18.0280 | 0.2612 | -139.3248  |
| log_g_Finegoldia  | Stroke              | Inverse variance weighted | 17 | 0.9971 | 0.9830 | 1.0114 | 0.6874 | 0.0073  | 0.0113 | 0.5296 | 18.0280 | 0.2612 | -139.3248  |
| log_g_Finegoldia  | Stroke              | Simple mode               | 17 | 0.9901 | 0.9549 | 1.0266 | 0.5981 | 0.0073  | 0.0113 | 0.5296 | 18.0280 | 0.2612 | -139.3248  |
| log_g_Finegoldia  | Stroke              | Weighted mode             | 17 | 0.9890 | 0.9543 | 1.0249 | 0.5519 | 0.0073  | 0.0113 | 0.5296 | 18.0280 | 0.2612 | -139.3248  |
| log_g_Gardnerella | CardioEmbolicStroke | MR Egger                  | 4  | 0.7925 | 0.3103 | 2.0241 | 0.6750 | 0.1235  | 0.1862 | 0.5754 | 0.8405  | 0.6569 | 979.3143   |
| log_g_Gardnerella | CardioEmbolicStroke | Weighted median           | 4  | 1.0893 | 0.9186 | 1.2918 | 0.3254 | 0.1235  | 0.1862 | 0.5754 | 0.8405  | 0.6569 | 979.3143   |
| log_g_Gardnerella | CardioEmbolicStroke | Inverse variance weighted | 4  | 1.0844 | 0.9398 | 1.2513 | 0.2669 | 0.1235  | 0.1862 | 0.5754 | 0.8405  | 0.6569 | 979.3143   |
| log_g_Gardnerella | CardioEmbolicStroke | Simple mode               | 4  | 1.1307 | 0.8882 | 1.4393 | 0.3921 | 0.1235  | 0.1862 | 0.5754 | 0.8405  | 0.6569 | 979.3143   |
| log_g_Gardnerella | CardioEmbolicStroke | Weighted mode             | 4  | 1.1096 | 0.8814 | 1.3968 | 0.4413 | 0.1235  | 0.1862 | 0.5754 | 0.8405  | 0.6569 | 979.3143   |
| log_g_Gardnerella | IschemicStroke      | MR Egger                  | 5  | 1.0960 | 0.9743 | 1.2328 | 0.2243 | -0.0335 | 0.0254 | 0.2785 | 5.3810  | 0.2504 | -2511.6389 |
| log_g_Gardnerella | IschemicStroke      | Weighted median           | 5  | 0.9977 | 0.9583 | 1.0387 | 0.9103 | -0.0335 | 0.0254 | 0.2785 | 5.3810  | 0.2504 | -2511.6389 |
| log_g_Gardnerella | IschemicStroke      | Inverse variance weighted | 5  | 1.0155 | 0.9809 | 1.0512 | 0.3847 | -0.0335 | 0.0254 | 0.2785 | 5.3810  | 0.2504 | -2511.6389 |
| log_g_Gardnerella | IschemicStroke      | Simple mode               | 5  | 0.9909 | 0.9380 | 1.0468 | 0.7610 | -0.0335 | 0.0254 | 0.2785 | 5.3810  | 0.2504 | -2511.6389 |
| log_g_Gardnerella | IschemicStroke      | Weighted mode             | 5  | 0.9909 | 0.9428 | 1.0415 | 0.7380 | -0.0335 | 0.0254 | 0.2785 | 5.3810  | 0.2504 | -2511.6389 |
| log_g_Gardnerella | LargeArteryStroke   | MR Egger                  | 5  | 1.1640 | 0.7964 | 1.7011 | 0.4901 | -0.0628 | 0.0807 | 0.4933 | 1.2193  | 0.8749 | -2796.2468 |
| log_g_Gardnerella | LargeArteryStroke   | Weighted median           | 5  | 1.0047 | 0.8869 | 1.1380 | 0.9418 | -0.0628 | 0.0807 | 0.4933 | 1.2193  | 0.8749 | -2796.2468 |

|                    |                     |                           |   |        |        |        |        |         |        |        |        |        |            |
|--------------------|---------------------|---------------------------|---|--------|--------|--------|--------|---------|--------|--------|--------|--------|------------|
| log_g_Gardnerella  | LargeArteryStroke   | Inverse variance weighted | 5 | 1.0064 | 0.9121 | 1.1104 | 0.8992 | -0.0628 | 0.0807 | 0.4933 | 1.2193 | 0.8749 | -2796.2468 |
| log_g_Gardnerella  | LargeArteryStroke   | Simple mode               | 5 | 0.9690 | 0.8279 | 1.1342 | 0.7151 | -0.0628 | 0.0807 | 0.4933 | 1.2193 | 0.8749 | -2796.2468 |
| log_g_Gardnerella  | LargeArteryStroke   | Weighted mode             | 5 | 0.9734 | 0.8250 | 1.1485 | 0.7656 | -0.0628 | 0.0807 | 0.4933 | 1.2193 | 0.8749 | -2796.2468 |
| log_g_Gardnerella  | SmallVesselStroke   | MR Egger                  | 5 | 1.1344 | 0.8869 | 1.4509 | 0.3893 | -0.0427 | 0.0526 | 0.4763 | 4.2465 | 0.2360 | -1495.4377 |
| log_g_Gardnerella  | SmallVesselStroke   | Weighted median           | 5 | 1.0072 | 0.9331 | 1.0872 | 0.8541 | -0.0427 | 0.0526 | 0.4763 | 4.2465 | 0.2360 | -1495.4377 |
| log_g_Gardnerella  | SmallVesselStroke   | Inverse variance weighted | 5 | 1.0281 | 0.9666 | 1.0935 | 0.3787 | -0.0427 | 0.0526 | 0.4763 | 4.2465 | 0.2360 | -1495.4377 |
| log_g_Gardnerella  | SmallVesselStroke   | Simple mode               | 5 | 1.0045 | 0.8992 | 1.1221 | 0.9410 | -0.0427 | 0.0526 | 0.4763 | 4.2465 | 0.2360 | -1495.4377 |
| log_g_Gardnerella  | SmallVesselStroke   | Weighted mode             | 5 | 1.0054 | 0.9137 | 1.1064 | 0.9174 | -0.0427 | 0.0526 | 0.4763 | 4.2465 | 0.2360 | -1495.4377 |
| log_g_Gardnerella  | Stroke              | MR Egger                  | 5 | 1.0497 | 0.9608 | 1.1468 | 0.3613 | -0.0215 | 0.0193 | 0.3466 | 2.3209 | 0.6770 | -6591.8134 |
| log_g_Gardnerella  | Stroke              | Weighted median           | 5 | 0.9877 | 0.9560 | 1.0203 | 0.4540 | -0.0215 | 0.0193 | 0.3466 | 2.3209 | 0.6770 | -6591.8134 |
| log_g_Gardnerella  | Stroke              | Inverse variance weighted | 5 | 1.0003 | 0.9755 | 1.0257 | 0.9819 | -0.0215 | 0.0193 | 0.3466 | 2.3209 | 0.6770 | -6591.8134 |
| log_g_Gardnerella  | Stroke              | Simple mode               | 5 | 0.9862 | 0.9446 | 1.0296 | 0.5614 | -0.0215 | 0.0193 | 0.3466 | 2.3209 | 0.6770 | -6591.8134 |
| log_g_Gardnerella  | Stroke              | Weighted mode             | 5 | 0.9862 | 0.9453 | 1.0289 | 0.5557 | -0.0215 | 0.0193 | 0.3466 | 2.3209 | 0.6770 | -6591.8134 |
| log_g_Helicobacter | CardioEmbolicStroke | MR Egger                  | 3 | 0.5354 | 0.1351 | 2.1221 | 0.5373 | 0.2040  | 0.2732 | 0.5917 | 0.2066 | 0.6494 | 246.7194   |
| log_g_Helicobacter | CardioEmbolicStroke | Weighted median           | 3 | 0.9289 | 0.7648 | 1.1282 | 0.4570 | 0.2040  | 0.2732 | 0.5917 | 0.2066 | 0.6494 | 246.7194   |
| log_g_Helicobacter | CardioEmbolicStroke | Inverse variance weighted | 3 | 0.9018 | 0.7743 | 1.0503 | 0.1839 | 0.2040  | 0.2732 | 0.5917 | 0.2066 | 0.6494 | 246.7194   |
| log_g_Helicobacter | CardioEmbolicStroke | Simple mode               | 3 | 0.9493 | 0.7605 | 1.1849 | 0.6906 | 0.2040  | 0.2732 | 0.5917 | 0.2066 | 0.6494 | 246.7194   |
| log_g_Helicobacter | CardioEmbolicStroke | Weighted mode             | 3 | 0.9500 | 0.7575 | 1.1913 | 0.7002 | 0.2040  | 0.2732 | 0.5917 | 0.2066 | 0.6494 | 246.7194   |
| log_g_Helicobacter | IschemicStroke      | MR Egger                  | 5 | 0.9781 | 0.8264 | 1.1576 | 0.8131 | 0.0102  | 0.0372 | 0.8020 | 6.0612 | 0.1087 | -1435.6187 |
| log_g_Helicobacter | IschemicStroke      | Weighted median           | 5 | 1.0188 | 0.9803 | 1.0589 | 0.3436 | 0.0102  | 0.0372 | 0.8020 | 6.0612 | 0.1087 | -1435.6187 |
| log_g_Helicobacter | IschemicStroke      | Inverse variance weighted | 5 | 1.0007 | 0.9672 | 1.0354 | 0.9663 | 0.0102  | 0.0372 | 0.8020 | 6.0612 | 0.1087 | -1435.6187 |
| log_g_Helicobacter | IschemicStroke      | Simple mode               | 5 | 1.0213 | 0.9731 | 1.0719 | 0.4411 | 0.0102  | 0.0372 | 0.8020 | 6.0612 | 0.1087 | -1435.6187 |
| log_g_Helicobacter | IschemicStroke      | Weighted mode             | 5 | 1.0206 | 0.9675 | 1.0766 | 0.4970 | 0.0102  | 0.0372 | 0.8020 | 6.0612 | 0.1087 | -1435.6187 |
| log_g_Helicobacter | LargeArteryStroke   | MR Egger                  | 3 | 1.1088 | 0.3971 | 3.0959 | 0.8761 | -0.0317 | 0.2037 | 0.9017 | 0.0076 | 0.9305 | 1740.5500  |
| log_g_Helicobacter | LargeArteryStroke   | Weighted median           | 3 | 1.0181 | 0.8913 | 1.1628 | 0.7919 | -0.0317 | 0.2037 | 0.9017 | 0.0076 | 0.9305 | 1740.5500  |
| log_g_Helicobacter | LargeArteryStroke   | Inverse variance weighted | 3 | 1.0224 | 0.9124 | 1.1457 | 0.7029 | -0.0317 | 0.2037 | 0.9017 | 0.0076 | 0.9305 | 1740.5500  |
| log_g_Helicobacter | LargeArteryStroke   | Simple mode               | 3 | 1.0143 | 0.8740 | 1.1772 | 0.8688 | -0.0317 | 0.2037 | 0.9017 | 0.0076 | 0.9305 | 1740.5500  |
| log_g_Helicobacter | LargeArteryStroke   | Weighted mode             | 3 | 1.0142 | 0.8660 | 1.1879 | 0.8771 | -0.0317 | 0.2037 | 0.9017 | 0.0076 | 0.9305 | 1740.5500  |
| log_g_Helicobacter | SmallVesselStroke   | MR Egger                  | 3 | 1.0795 | 0.6114 | 1.9058 | 0.8359 | -0.0342 | 0.1128 | 0.8127 | 0.8277 | 0.3629 | 1345.7827  |
| log_g_Helicobacter | SmallVesselStroke   | Weighted median           | 3 | 1.0064 | 0.9310 | 1.0880 | 0.8717 | -0.0342 | 0.1128 | 0.8127 | 0.8277 | 0.3629 | 1345.7827  |
| log_g_Helicobacter | SmallVesselStroke   | Inverse variance weighted | 3 | 0.9892 | 0.9287 | 1.0537 | 0.7366 | -0.0342 | 0.1128 | 0.8127 | 0.8277 | 0.3629 | 1345.7827  |
| log_g_Helicobacter | SmallVesselStroke   | Simple mode               | 3 | 1.0098 | 0.9301 | 1.0963 | 0.8375 | -0.0342 | 0.1128 | 0.8127 | 0.8277 | 0.3629 | 1345.7827  |
| log_g_Helicobacter | SmallVesselStroke   | Weighted mode             | 3 | 1.0103 | 0.9261 | 1.1022 | 0.8390 | -0.0342 | 0.1128 | 0.8127 | 0.8277 | 0.3629 | 1345.7827  |
| log_g_Helicobacter | Stroke              | MR Egger                  | 5 | 0.9912 | 0.8643 | 1.1367 | 0.9074 | 0.0046  | 0.0302 | 0.8887 | 5.4483 | 0.1418 | -1519.3269 |
| log_g_Helicobacter | Stroke              | Weighted median           | 5 | 1.0065 | 0.9755 | 1.0384 | 0.6854 | 0.0046  | 0.0302 | 0.8887 | 5.4483 | 0.1418 | -1519.3269 |
| log_g_Helicobacter | Stroke              | Inverse variance weighted | 5 | 1.0015 | 0.9744 | 1.0293 | 0.9135 | 0.0046  | 0.0302 | 0.8887 | 5.4483 | 0.1418 | -1519.3269 |
| log_g_Helicobacter | Stroke              | Simple mode               | 5 | 1.0206 | 0.9756 | 1.0677 | 0.4255 | 0.0046  | 0.0302 | 0.8887 | 5.4483 | 0.1418 | -1519.3269 |
| log_g_Helicobacter | Stroke              | Weighted mode             | 5 | 1.0136 | 0.9611 | 1.0689 | 0.6447 | 0.0046  | 0.0302 | 0.8887 | 5.4483 | 0.1418 | -1519.3269 |
| log_g_Histophilus  | CardioEmbolicStroke | MR Egger                  | 6 | 2.0244 | 0.6872 | 5.9635 | 0.2699 | -0.2531 | 0.2087 | 0.2920 | 2.8542 | 0.7224 | 11050.2944 |
| log_g_Histophilus  | CardioEmbolicStroke | Weighted median           | 6 | 1.0364 | 0.9001 | 1.1933 | 0.6192 | -0.2531 | 0.2087 | 0.2920 | 2.8542 | 0.7224 | 11050.2944 |
| log_g_Histophilus  | CardioEmbolicStroke | Inverse variance weighted | 6 | 1.0412 | 0.9317 | 1.1635 | 0.4767 | -0.2531 | 0.2087 | 0.2920 | 2.8542 | 0.7224 | 11050.2944 |
| log_g_Histophilus  | CardioEmbolicStroke | Simple mode               | 6 | 1.0464 | 0.8408 | 1.3023 | 0.7012 | -0.2531 | 0.2087 | 0.2920 | 2.8542 | 0.7224 | 11050.2944 |
| log_g_Histophilus  | CardioEmbolicStroke | Weighted mode             | 6 | 1.0396 | 0.8342 | 1.2954 | 0.7437 | -0.2531 | 0.2087 | 0.2920 | 2.8542 | 0.7224 | 11050.2944 |
| log_g_Histophilus  | IschemicStroke      | MR Egger                  | 7 | 0.9801 | 0.8337 | 1.1523 | 0.8176 | 0.0060  | 0.0319 | 0.8581 | 6.0934 | 0.2972 | -1798.4933 |
| log_g_Histophilus  | IschemicStroke      | Weighted median           | 7 | 1.0017 | 0.9684 | 1.0361 | 0.9222 | 0.0060  | 0.0319 | 0.8581 | 6.0934 | 0.2972 | -1798.4933 |
| log_g_Histophilus  | IschemicStroke      | Inverse variance weighted | 7 | 0.9953 | 0.9704 | 1.0207 | 0.7121 | 0.0060  | 0.0319 | 0.8581 | 6.0934 | 0.2972 | -1798.4933 |
| log_g_Histophilus  | IschemicStroke      | Simple mode               | 7 | 1.0059 | 0.9568 | 1.0576 | 0.8249 | 0.0060  | 0.0319 | 0.8581 | 6.0934 | 0.2972 | -1798.4933 |
| log_g_Histophilus  | IschemicStroke      | Weighted mode             | 7 | 1.0018 | 0.9549 | 1.0510 | 0.9425 | 0.0060  | 0.0319 | 0.8581 | 6.0934 | 0.2972 | -1798.4933 |
| log_g_Histophilus  | LargeArteryStroke   | MR Egger                  | 6 | 0.5995 | 0.2185 | 1.6447 | 0.3766 | 0.1889  | 0.1948 | 0.3871 | 7.6223 | 0.1783 | 10651.8703 |
| log_g_Histophilus  | LargeArteryStroke   | Weighted median           | 6 | 0.9973 | 0.8954 | 1.1106 | 0.9601 | 0.1889  | 0.1948 | 0.3871 | 7.6223 | 0.1783 | 10651.8703 |
| log_g_Histophilus  | LargeArteryStroke   | Inverse variance weighted | 6 | 0.9852 | 0.8892 | 1.0915 | 0.7753 | 0.1889  | 0.1948 | 0.3871 | 7.6223 | 0.1783 | 10651.8703 |
| log_g_Histophilus  | LargeArteryStroke   | Simple mode               | 6 | 1.0575 | 0.8615 | 1.2981 | 0.6156 | 0.1889  | 0.1948 | 0.3871 | 7.6223 | 0.1783 | 10651.8703 |
| log_g_Histophilus  | LargeArteryStroke   | Weighted mode             | 6 | 1.0592 | 0.8605 | 1.3037 | 0.6106 | 0.1889  | 0.1948 | 0.3871 | 7.6223 | 0.1783 | 10651.8703 |

|                   |                     |                           |    |        |        |        |        |         |        |        |         |        |            |
|-------------------|---------------------|---------------------------|----|--------|--------|--------|--------|---------|--------|--------|---------|--------|------------|
| log_g_Histophilus | SmallVesselStroke   | MR Egger                  | 6  | 0.9535 | 0.5905 | 1.5395 | 0.8549 | 0.0195  | 0.0925 | 0.8430 | 4.4962  | 0.3430 | 31412.4709 |
| log_g_Histophilus | SmallVesselStroke   | Weighted median           | 6  | 1.0268 | 0.9691 | 1.0880 | 0.3698 | 0.0195  | 0.0925 | 0.8430 | 4.4962  | 0.3430 | 31412.4709 |
| log_g_Histophilus | SmallVesselStroke   | Inverse variance weighted | 6  | 1.0037 | 0.9584 | 1.0512 | 0.8746 | 0.0195  | 0.0925 | 0.8430 | 4.4962  | 0.3430 | 31412.4709 |
| log_g_Histophilus | SmallVesselStroke   | Simple mode               | 6  | 1.0449 | 0.9492 | 1.1502 | 0.4111 | 0.0195  | 0.0925 | 0.8430 | 4.4962  | 0.3430 | 31412.4709 |
| log_g_Histophilus | SmallVesselStroke   | Weighted mode             | 6  | 1.0443 | 0.9536 | 1.1437 | 0.3925 | 0.0195  | 0.0925 | 0.8430 | 4.4962  | 0.3430 | 31412.4709 |
| log_g_Histophilus | Stroke              | MR Egger                  | 7  | 0.9391 | 0.8216 | 1.0734 | 0.3992 | 0.0281  | 0.0266 | 0.3400 | 8.7564  | 0.1877 | -1462.9328 |
| log_g_Histophilus | Stroke              | Weighted median           | 7  | 1.0048 | 0.9762 | 1.0343 | 0.7462 | 0.0281  | 0.0266 | 0.3400 | 8.7564  | 0.1877 | -1462.9328 |
| log_g_Histophilus | Stroke              | Inverse variance weighted | 7  | 1.0078 | 0.9825 | 1.0339 | 0.5490 | 0.0281  | 0.0266 | 0.3400 | 8.7564  | 0.1877 | -1462.9328 |
| log_g_Histophilus | Stroke              | Simple mode               | 7  | 1.0079 | 0.9651 | 1.0526 | 0.7338 | 0.0281  | 0.0266 | 0.3400 | 8.7564  | 0.1877 | -1462.9328 |
| log_g_Histophilus | Stroke              | Weighted mode             | 7  | 1.0088 | 0.9693 | 1.0500 | 0.6811 | 0.0281  | 0.0266 | 0.3400 | 8.7564  | 0.1877 | -1462.9328 |
| log_g_Kingella    | CardioEmbolicStroke | MR Egger                  | 7  | 1.0009 | 0.6871 | 1.4580 | 0.9965 | 0.0290  | 0.0873 | 0.7535 | 3.9187  | 0.5612 | -214.7308  |
| log_g_Kingella    | CardioEmbolicStroke | Weighted median           | 7  | 1.0547 | 0.9276 | 1.1991 | 0.4163 | 0.0290  | 0.0873 | 0.7535 | 3.9187  | 0.5612 | -214.7308  |
| log_g_Kingella    | CardioEmbolicStroke | Inverse variance weighted | 7  | 1.0643 | 0.9644 | 1.1747 | 0.2153 | 0.0290  | 0.0873 | 0.7535 | 3.9187  | 0.5612 | -214.7308  |
| log_g_Kingella    | CardioEmbolicStroke | Simple mode               | 7  | 1.0737 | 0.8791 | 1.3115 | 0.5118 | 0.0290  | 0.0873 | 0.7535 | 3.9187  | 0.5612 | -214.7308  |
| log_g_Kingella    | CardioEmbolicStroke | Weighted mode             | 7  | 1.0480 | 0.8653 | 1.2693 | 0.6485 | 0.0290  | 0.0873 | 0.7535 | 3.9187  | 0.5612 | -214.7308  |
| log_g_Kingella    | IschemicStroke      | MR Egger                  | 9  | 0.9731 | 0.8776 | 1.0791 | 0.6210 | 0.0165  | 0.0254 | 0.5372 | 15.4446 | 0.0307 | -208.8194  |
| log_g_Kingella    | IschemicStroke      | Weighted median           | 9  | 1.0042 | 0.9747 | 1.0347 | 0.7816 | 0.0165  | 0.0254 | 0.5372 | 15.4446 | 0.0307 | -208.8194  |
| log_g_Kingella    | IschemicStroke      | Inverse variance weighted | 9  | 1.0054 | 0.9756 | 1.0360 | 0.7272 | 0.0165  | 0.0254 | 0.5372 | 15.4446 | 0.0307 | -208.8194  |
| log_g_Kingella    | IschemicStroke      | Simple mode               | 9  | 1.0276 | 0.9709 | 1.0877 | 0.3741 | 0.0165  | 0.0254 | 0.5372 | 15.4446 | 0.0307 | -208.8194  |
| log_g_Kingella    | IschemicStroke      | Weighted mode             | 9  | 1.0149 | 0.9612 | 1.0717 | 0.6076 | 0.0165  | 0.0254 | 0.5372 | 15.4446 | 0.0307 | -208.8194  |
| log_g_Kingella    | LargeArteryStroke   | MR Egger                  | 8  | 1.0205 | 0.7092 | 1.4684 | 0.9166 | -0.0019 | 0.0885 | 0.9834 | 14.4273 | 0.0252 | -68.9242   |
| log_g_Kingella    | LargeArteryStroke   | Weighted median           | 8  | 0.9500 | 0.8629 | 1.0458 | 0.2956 | -0.0019 | 0.0885 | 0.9834 | 14.4273 | 0.0252 | -68.9242   |
| log_g_Kingella    | LargeArteryStroke   | Inverse variance weighted | 8  | 1.0166 | 0.9208 | 1.1223 | 0.7448 | -0.0019 | 0.0885 | 0.9834 | 14.4273 | 0.0252 | -68.9242   |
| log_g_Kingella    | LargeArteryStroke   | Simple mode               | 8  | 0.9215 | 0.7913 | 1.0731 | 0.3278 | -0.0019 | 0.0885 | 0.9834 | 14.4273 | 0.0252 | -68.9242   |
| log_g_Kingella    | LargeArteryStroke   | Weighted mode             | 8  | 0.9257 | 0.8071 | 1.0618 | 0.3065 | -0.0019 | 0.0885 | 0.9834 | 14.4273 | 0.0252 | -68.9242   |
| log_g_Kingella    | SmallVesselStroke   | MR Egger                  | 9  | 1.0267 | 0.8661 | 1.2172 | 0.7700 | -0.0126 | 0.0418 | 0.7715 | 13.1529 | 0.0685 | -72.1836   |
| log_g_Kingella    | SmallVesselStroke   | Weighted median           | 9  | 0.9703 | 0.9227 | 1.0204 | 0.2404 | -0.0126 | 0.0418 | 0.7715 | 13.1529 | 0.0685 | -72.1836   |
| log_g_Kingella    | SmallVesselStroke   | Inverse variance weighted | 9  | 1.0014 | 0.9540 | 1.0511 | 0.9549 | -0.0126 | 0.0418 | 0.7715 | 13.1529 | 0.0685 | -72.1836   |
| log_g_Kingella    | SmallVesselStroke   | Simple mode               | 9  | 0.9597 | 0.8863 | 1.0392 | 0.3406 | -0.0126 | 0.0418 | 0.7715 | 13.1529 | 0.0685 | -72.1836   |
| log_g_Kingella    | SmallVesselStroke   | Weighted mode             | 9  | 0.9597 | 0.8965 | 1.0274 | 0.2710 | -0.0126 | 0.0418 | 0.7715 | 13.1529 | 0.0685 | -72.1836   |
| log_g_Kingella    | Stroke              | MR Egger                  | 10 | 0.9787 | 0.9042 | 1.0592 | 0.6075 | 0.0120  | 0.0196 | 0.5554 | 14.5192 | 0.0692 | -267.0103  |
| log_g_Kingella    | Stroke              | Weighted median           | 10 | 1.0099 | 0.9830 | 1.0375 | 0.4750 | 0.0120  | 0.0196 | 0.5554 | 14.5192 | 0.0692 | -267.0103  |
| log_g_Kingella    | Stroke              | Inverse variance weighted | 10 | 1.0021 | 0.9793 | 1.0254 | 0.8576 | 0.0120  | 0.0196 | 0.5554 | 14.5192 | 0.0692 | -267.0103  |
| log_g_Kingella    | Stroke              | Simple mode               | 10 | 1.0155 | 0.9693 | 1.0640 | 0.5337 | 0.0120  | 0.0196 | 0.5554 | 14.5192 | 0.0692 | -267.0103  |
| log_g_Kingella    | Stroke              | Weighted mode             | 10 | 1.0155 | 0.9751 | 1.0576 | 0.4761 | 0.0120  | 0.0196 | 0.5554 | 14.5192 | 0.0692 | -267.0103  |
| log_g_Lawsonia    | CardioEmbolicStroke | MR Egger                  | 7  | 1.4284 | 0.6746 | 3.0246 | 0.3944 | -0.1340 | 0.1598 | 0.4399 | 9.6890  | 0.0845 | -494.9708  |
| log_g_Lawsonia    | CardioEmbolicStroke | Weighted median           | 7  | 0.9643 | 0.8151 | 1.1409 | 0.6720 | -0.1340 | 0.1598 | 0.4399 | 9.6890  | 0.0845 | -494.9708  |
| log_g_Lawsonia    | CardioEmbolicStroke | Inverse variance weighted | 7  | 1.0426 | 0.9034 | 1.2033 | 0.5682 | -0.1340 | 0.1598 | 0.4399 | 9.6890  | 0.0845 | -494.9708  |
| log_g_Lawsonia    | CardioEmbolicStroke | Simple mode               | 7  | 0.9068 | 0.6692 | 1.2288 | 0.5514 | -0.1340 | 0.1598 | 0.4399 | 9.6890  | 0.0845 | -494.9708  |
| log_g_Lawsonia    | CardioEmbolicStroke | Weighted mode             | 7  | 0.9047 | 0.6682 | 1.2251 | 0.5414 | -0.1340 | 0.1598 | 0.4399 | 9.6890  | 0.0845 | -494.9708  |
| log_g_Lawsonia    | IschemicStroke      | MR Egger                  | 9  | 1.0220 | 0.9290 | 1.1244 | 0.6679 | -0.0067 | 0.0206 | 0.7549 | 5.7247  | 0.5722 | -786.1803  |
| log_g_Lawsonia    | IschemicStroke      | Weighted median           | 9  | 1.0042 | 0.9751 | 1.0342 | 0.7798 | -0.0067 | 0.0206 | 0.7549 | 5.7247  | 0.5722 | -786.1803  |
| log_g_Lawsonia    | IschemicStroke      | Inverse variance weighted | 9  | 1.0064 | 0.9847 | 1.0286 | 0.5652 | -0.0067 | 0.0206 | 0.7549 | 5.7247  | 0.5722 | -786.1803  |
| log_g_Lawsonia    | IschemicStroke      | Simple mode               | 9  | 1.0143 | 0.9685 | 1.0622 | 0.5644 | -0.0067 | 0.0206 | 0.7549 | 5.7247  | 0.5722 | -786.1803  |
| log_g_Lawsonia    | IschemicStroke      | Weighted mode             | 9  | 0.9935 | 0.9504 | 1.0386 | 0.7805 | -0.0067 | 0.0206 | 0.7549 | 5.7247  | 0.5722 | -786.1803  |
| log_g_Lawsonia    | LargeArteryStroke   | MR Egger                  | 8  | 0.9069 | 0.6618 | 1.2428 | 0.5657 | 0.0408  | 0.0691 | 0.5762 | 2.9616  | 0.8137 | -259.7517  |
| log_g_Lawsonia    | LargeArteryStroke   | Weighted median           | 8  | 1.0209 | 0.9229 | 1.1292 | 0.6886 | 0.0408  | 0.0691 | 0.5762 | 2.9616  | 0.8137 | -259.7517  |
| log_g_Lawsonia    | LargeArteryStroke   | Inverse variance weighted | 8  | 0.9945 | 0.9218 | 1.0730 | 0.8867 | 0.0408  | 0.0691 | 0.5762 | 2.9616  | 0.8137 | -259.7517  |
| log_g_Lawsonia    | LargeArteryStroke   | Simple mode               | 8  | 1.0320 | 0.8967 | 1.1877 | 0.6739 | 0.0408  | 0.0691 | 0.5762 | 2.9616  | 0.8137 | -259.7517  |
| log_g_Lawsonia    | LargeArteryStroke   | Weighted mode             | 8  | 1.0304 | 0.8928 | 1.1892 | 0.6944 | 0.0408  | 0.0691 | 0.5762 | 2.9616  | 0.8137 | -259.7517  |
| log_g_Lawsonia    | SmallVesselStroke   | MR Egger                  | 8  | 1.0167 | 0.7970 | 1.2970 | 0.8983 | -0.0037 | 0.0534 | 0.9464 | 11.6634 | 0.0699 | -314.0167  |
| log_g_Lawsonia    | SmallVesselStroke   | Weighted median           | 8  | 1.0161 | 0.9567 | 1.0792 | 0.6030 | -0.0037 | 0.0534 | 0.9464 | 11.6634 | 0.0699 | -314.0167  |
| log_g_Lawsonia    | SmallVesselStroke   | Inverse variance weighted | 8  | 1.0081 | 0.9548 | 1.0645 | 0.7701 | -0.0037 | 0.0534 | 0.9464 | 11.6634 | 0.0699 | -314.0167  |

|                       |                     |                           |    |        |        |        |        |         |        |        |         |        |            |
|-----------------------|---------------------|---------------------------|----|--------|--------|--------|--------|---------|--------|--------|---------|--------|------------|
| log_g_Lawsonia        | SmallVesselStroke   | Simple mode               | 8  | 1.0705 | 0.9420 | 1.2165 | 0.3314 | -0.0037 | 0.0534 | 0.9464 | 11.6634 | 0.0699 | -314.0167  |
| log_g_Lawsonia        | SmallVesselStroke   | Weighted mode             | 8  | 1.0694 | 0.9537 | 1.1992 | 0.2882 | -0.0037 | 0.0534 | 0.9464 | 11.6634 | 0.0699 | -314.0167  |
| log_g_Lawsonia        | Stroke              | MR Egger                  | 9  | 0.9756 | 0.8767 | 1.0855 | 0.6635 | 0.0122  | 0.0231 | 0.6132 | 12.9644 | 0.0730 | -585.3994  |
| log_g_Lawsonia        | Stroke              | Weighted median           | 9  | 0.9891 | 0.9636 | 1.0152 | 0.4102 | 0.0122  | 0.0231 | 0.6132 | 12.9644 | 0.0730 | -585.3994  |
| log_g_Lawsonia        | Stroke              | Inverse variance weighted | 9  | 1.0033 | 0.9794 | 1.0277 | 0.7907 | 0.0122  | 0.0231 | 0.6132 | 12.9644 | 0.0730 | -585.3994  |
| log_g_Lawsonia        | Stroke              | Simple mode               | 9  | 0.9746 | 0.9322 | 1.0189 | 0.2892 | 0.0122  | 0.0231 | 0.6132 | 12.9644 | 0.0730 | -585.3994  |
| log_g_Lawsonia        | Stroke              | Weighted mode             | 9  | 0.9749 | 0.9343 | 1.0174 | 0.2764 | 0.0122  | 0.0231 | 0.6132 | 12.9644 | 0.0730 | -585.3994  |
| log_g_Leuconostoc     | CardioEmbolicStroke | MR Egger                  | 9  | 1.1620 | 0.8651 | 1.5609 | 0.3519 | -0.0780 | 0.0661 | 0.2766 | 8.2541  | 0.4090 | -164.5593  |
| log_g_Leuconostoc     | CardioEmbolicStroke | Weighted median           | 9  | 0.9842 | 0.8733 | 1.1091 | 0.7934 | -0.0780 | 0.0661 | 0.2766 | 8.2541  | 0.4090 | -164.5593  |
| log_g_Leuconostoc     | CardioEmbolicStroke | Inverse variance weighted | 9  | 0.9804 | 0.8983 | 1.0701 | 0.6579 | -0.0780 | 0.0661 | 0.2766 | 8.2541  | 0.4090 | -164.5593  |
| log_g_Leuconostoc     | CardioEmbolicStroke | Simple mode               | 9  | 0.9946 | 0.8373 | 1.1816 | 0.9525 | -0.0780 | 0.0661 | 0.2766 | 8.2541  | 0.4090 | -164.5593  |
| log_g_Leuconostoc     | CardioEmbolicStroke | Weighted mode             | 9  | 1.0000 | 0.8487 | 1.1782 | 0.9999 | -0.0780 | 0.0661 | 0.2766 | 8.2541  | 0.4090 | -164.5593  |
| log_g_Leuconostoc     | IschemicStroke      | MR Egger                  | 10 | 1.0241 | 0.9580 | 1.0946 | 0.5042 | -0.0114 | 0.0149 | 0.4641 | 5.6340  | 0.6881 | -914.7198  |
| log_g_Leuconostoc     | IschemicStroke      | Weighted median           | 10 | 0.9982 | 0.9736 | 1.0234 | 0.8880 | -0.0114 | 0.0149 | 0.4641 | 5.6340  | 0.6881 | -914.7198  |
| log_g_Leuconostoc     | IschemicStroke      | Inverse variance weighted | 10 | 0.9988 | 0.9796 | 1.0183 | 0.9011 | -0.0114 | 0.0149 | 0.4641 | 5.6340  | 0.6881 | -914.7198  |
| log_g_Leuconostoc     | IschemicStroke      | Simple mode               | 10 | 1.0053 | 0.9668 | 1.0453 | 0.7965 | -0.0114 | 0.0149 | 0.4641 | 5.6340  | 0.6881 | -914.7198  |
| log_g_Leuconostoc     | IschemicStroke      | Weighted mode             | 10 | 0.9998 | 0.9627 | 1.0384 | 0.9935 | -0.0114 | 0.0149 | 0.4641 | 5.6340  | 0.6881 | -914.7198  |
| log_g_Leuconostoc     | LargeArteryStroke   | MR Egger                  | 9  | 1.0934 | 0.8781 | 1.3614 | 0.4510 | -0.0366 | 0.0492 | 0.4809 | 2.6468  | 0.9156 | -391.1159  |
| log_g_Leuconostoc     | LargeArteryStroke   | Weighted median           | 9  | 0.9978 | 0.9161 | 1.0868 | 0.9604 | -0.0366 | 0.0492 | 0.4809 | 2.6468  | 0.9156 | -391.1159  |
| log_g_Leuconostoc     | LargeArteryStroke   | Inverse variance weighted | 9  | 1.0097 | 0.9468 | 1.0768 | 0.7682 | -0.0366 | 0.0492 | 0.4809 | 2.6468  | 0.9156 | -391.1159  |
| log_g_Leuconostoc     | LargeArteryStroke   | Simple mode               | 9  | 0.9917 | 0.8718 | 1.1281 | 0.9024 | -0.0366 | 0.0492 | 0.4809 | 2.6468  | 0.9156 | -391.1159  |
| log_g_Leuconostoc     | LargeArteryStroke   | Weighted mode             | 9  | 0.9935 | 0.8752 | 1.1279 | 0.9225 | -0.0366 | 0.0492 | 0.4809 | 2.6468  | 0.9156 | -391.1159  |
| log_g_Leuconostoc     | SmallVesselStroke   | MR Egger                  | 9  | 1.0196 | 0.8996 | 1.1556 | 0.7704 | 0.0053  | 0.0281 | 0.8550 | 7.3829  | 0.3901 | -348.0225  |
| log_g_Leuconostoc     | SmallVesselStroke   | Weighted median           | 9  | 1.0296 | 0.9785 | 1.0835 | 0.2613 | 0.0053  | 0.0281 | 0.8550 | 7.3829  | 0.3901 | -348.0225  |
| log_g_Leuconostoc     | SmallVesselStroke   | Inverse variance weighted | 9  | 1.0314 | 0.9951 | 1.0691 | 0.0909 | 0.0053  | 0.0281 | 0.8550 | 7.3829  | 0.3901 | -348.0225  |
| log_g_Leuconostoc     | SmallVesselStroke   | Simple mode               | 9  | 1.0326 | 0.9559 | 1.1155 | 0.4383 | 0.0053  | 0.0281 | 0.8550 | 7.3829  | 0.3901 | -348.0225  |
| log_g_Leuconostoc     | SmallVesselStroke   | Weighted mode             | 9  | 1.0338 | 0.9648 | 1.1077 | 0.3729 | 0.0053  | 0.0281 | 0.8550 | 7.3829  | 0.3901 | -348.0225  |
| log_g_Leuconostoc     | Stroke              | MR Egger                  | 11 | 1.0045 | 0.9469 | 1.0656 | 0.8846 | -0.0048 | 0.0130 | 0.7209 | 5.8550  | 0.7543 | -1053.8658 |
| log_g_Leuconostoc     | Stroke              | Weighted median           | 11 | 0.9924 | 0.9710 | 1.0142 | 0.4913 | -0.0048 | 0.0130 | 0.7209 | 5.8550  | 0.7543 | -1053.8658 |
| log_g_Leuconostoc     | Stroke              | Inverse variance weighted | 11 | 0.9939 | 0.9776 | 1.0104 | 0.4645 | -0.0048 | 0.0130 | 0.7209 | 5.8550  | 0.7543 | -1053.8658 |
| log_g_Leuconostoc     | Stroke              | Simple mode               | 11 | 0.9899 | 0.9543 | 1.0269 | 0.6011 | -0.0048 | 0.0130 | 0.7209 | 5.8550  | 0.7543 | -1053.8658 |
| log_g_Leuconostoc     | Stroke              | Weighted mode             | 11 | 0.9849 | 0.9501 | 1.0209 | 0.4255 | -0.0048 | 0.0130 | 0.7209 | 5.8550  | 0.7543 | -1053.8658 |
| log_g_Methylobacillus | CardioEmbolicStroke | MR Egger                  | 9  | 0.8509 | 0.6115 | 1.1839 | 0.3698 | 0.0618  | 0.0799 | 0.4649 | 8.6434  | 0.2793 | -49.6229   |
| log_g_Methylobacillus | CardioEmbolicStroke | Weighted median           | 9  | 0.9583 | 0.8462 | 1.0853 | 0.5027 | 0.0618  | 0.0799 | 0.4649 | 8.6434  | 0.2793 | -49.6229   |
| log_g_Methylobacillus | CardioEmbolicStroke | Inverse variance weighted | 9  | 0.9632 | 0.8732 | 1.0625 | 0.4543 | 0.0618  | 0.0799 | 0.4649 | 8.6434  | 0.2793 | -49.6229   |
| log_g_Methylobacillus | CardioEmbolicStroke | Simple mode               | 9  | 0.9867 | 0.8069 | 1.2067 | 0.8998 | 0.0618  | 0.0799 | 0.4649 | 8.6434  | 0.2793 | -49.6229   |
| log_g_Methylobacillus | CardioEmbolicStroke | Weighted mode             | 9  | 0.9940 | 0.8207 | 1.2038 | 0.9521 | 0.0618  | 0.0799 | 0.4649 | 8.6434  | 0.2793 | -49.6229   |
| log_g_Methylobacillus | IschemicStroke      | MR Egger                  | 9  | 1.0071 | 0.9404 | 1.0785 | 0.8463 | -0.0011 | 0.0166 | 0.9480 | 6.5296  | 0.4794 | -586.8206  |
| log_g_Methylobacillus | IschemicStroke      | Weighted median           | 9  | 1.0076 | 0.9805 | 1.0355 | 0.5849 | -0.0011 | 0.0166 | 0.9480 | 6.5296  | 0.4794 | -586.8206  |
| log_g_Methylobacillus | IschemicStroke      | Inverse variance weighted | 9  | 1.0048 | 0.9840 | 1.0260 | 0.6539 | -0.0011 | 0.0166 | 0.9480 | 6.5296  | 0.4794 | -586.8206  |
| log_g_Methylobacillus | IschemicStroke      | Simple mode               | 9  | 1.0022 | 0.9604 | 1.0458 | 0.9213 | -0.0011 | 0.0166 | 0.9480 | 6.5296  | 0.4794 | -586.8206  |
| log_g_Methylobacillus | IschemicStroke      | Weighted mode             | 9  | 1.0014 | 0.9583 | 1.0465 | 0.9509 | -0.0011 | 0.0166 | 0.9480 | 6.5296  | 0.4794 | -586.8206  |
| log_g_Methylobacillus | LargeArteryStroke   | MR Egger                  | 9  | 0.9897 | 0.7929 | 1.2354 | 0.9298 | 0.0212  | 0.0538 | 0.7050 | 3.2983  | 0.8561 | -219.0857  |
| log_g_Methylobacillus | LargeArteryStroke   | Weighted median           | 9  | 1.0424 | 0.9609 | 1.1308 | 0.3179 | 0.0212  | 0.0538 | 0.7050 | 3.2983  | 0.8561 | -219.0857  |
| log_g_Methylobacillus | LargeArteryStroke   | Inverse variance weighted | 9  | 1.0327 | 0.9650 | 1.1051 | 0.3523 | 0.0212  | 0.0538 | 0.7050 | 3.2983  | 0.8561 | -219.0857  |
| log_g_Methylobacillus | LargeArteryStroke   | Simple mode               | 9  | 1.0471 | 0.9222 | 1.1889 | 0.4974 | 0.0212  | 0.0538 | 0.7050 | 3.2983  | 0.8561 | -219.0857  |
| log_g_Methylobacillus | LargeArteryStroke   | Weighted mode             | 9  | 1.0446 | 0.9261 | 1.1783 | 0.4977 | 0.0212  | 0.0538 | 0.7050 | 3.2983  | 0.8561 | -219.0857  |
| log_g_Methylobacillus | SmallVesselStroke   | MR Egger                  | 9  | 0.9969 | 0.8812 | 1.1277 | 0.9615 | -0.0032 | 0.0299 | 0.9174 | 3.2675  | 0.8592 | -355.7357  |
| log_g_Methylobacillus | SmallVesselStroke   | Weighted median           | 9  | 0.9841 | 0.9397 | 1.0307 | 0.4980 | -0.0032 | 0.0299 | 0.9174 | 3.2675  | 0.8592 | -355.7357  |
| log_g_Methylobacillus | SmallVesselStroke   | Inverse variance weighted | 9  | 0.9905 | 0.9539 | 1.0284 | 0.6176 | -0.0032 | 0.0299 | 0.9174 | 3.2675  | 0.8592 | -355.7357  |
| log_g_Methylobacillus | SmallVesselStroke   | Simple mode               | 9  | 0.9757 | 0.9065 | 1.0502 | 0.5305 | -0.0032 | 0.0299 | 0.9174 | 3.2675  | 0.8592 | -355.7357  |
| log_g_Methylobacillus | SmallVesselStroke   | Weighted mode             | 9  | 0.9739 | 0.9050 | 1.0480 | 0.4995 | -0.0032 | 0.0299 | 0.9174 | 3.2675  | 0.8592 | -355.7357  |
| log_g_Methylobacillus | Stroke              | MR Egger                  | 8  | 0.9973 | 0.9337 | 1.0652 | 0.9381 | -0.0004 | 0.0153 | 0.9825 | 4.6126  | 0.5944 | -1488.3412 |

|                         |                     |                           |    |        |        |        |        |         |        |        |        |        |            |
|-------------------------|---------------------|---------------------------|----|--------|--------|--------|--------|---------|--------|--------|--------|--------|------------|
| log_g_Methylobacillus   | Stroke              | Weighted median           | 8  | 1.0001 | 0.9769 | 1.0240 | 0.9905 | -0.0004 | 0.0153 | 0.9825 | 4.6126 | 0.5944 | -1488.3412 |
| log_g_Methylobacillus   | Stroke              | Inverse variance weighted | 8  | 0.9965 | 0.9779 | 1.0155 | 0.7187 | -0.0004 | 0.0153 | 0.9825 | 4.6126 | 0.5944 | -1488.3412 |
| log_g_Methylobacillus   | Stroke              | Simple mode               | 8  | 1.0075 | 0.9688 | 1.0477 | 0.7205 | -0.0004 | 0.0153 | 0.9825 | 4.6126 | 0.5944 | -1488.3412 |
| log_g_Methylobacillus   | Stroke              | Weighted mode             | 8  | 1.0086 | 0.9700 | 1.0488 | 0.6803 | -0.0004 | 0.0153 | 0.9825 | 4.6126 | 0.5944 | -1488.3412 |
| log_g_Olsenella         | CardioEmbolicStroke | MR Egger                  | 9  | 1.1115 | 0.8040 | 1.5365 | 0.5427 | -0.0243 | 0.0813 | 0.7737 | 4.0029 | 0.7794 | -100.8335  |
| log_g_Olsenella         | CardioEmbolicStroke | Weighted median           | 9  | 1.0615 | 0.9461 | 1.1910 | 0.3096 | -0.0243 | 0.0813 | 0.7737 | 4.0029 | 0.7794 | -100.8335  |
| log_g_Olsenella         | CardioEmbolicStroke | Inverse variance weighted | 9  | 1.0601 | 0.9669 | 1.1622 | 0.2136 | -0.0243 | 0.0813 | 0.7737 | 4.0029 | 0.7794 | -100.8335  |
| log_g_Olsenella         | CardioEmbolicStroke | Simple mode               | 9  | 1.0371 | 0.8704 | 1.2357 | 0.6944 | -0.0243 | 0.0813 | 0.7737 | 4.0029 | 0.7794 | -100.8335  |
| log_g_Olsenella         | CardioEmbolicStroke | Weighted mode             | 9  | 1.0421 | 0.8884 | 1.2224 | 0.6265 | -0.0243 | 0.0813 | 0.7737 | 4.0029 | 0.7794 | -100.8335  |
| log_g_Olsenella         | IschemicStroke      | MR Egger                  | 10 | 1.0082 | 0.9421 | 1.0789 | 0.8199 | 0.0007  | 0.0175 | 0.9709 | 8.2735 | 0.4072 | -208.5505  |
| log_g_Olsenella         | IschemicStroke      | Weighted median           | 10 | 1.0055 | 0.9780 | 1.0338 | 0.6973 | 0.0007  | 0.0175 | 0.9709 | 8.2735 | 0.4072 | -208.5505  |
| log_g_Olsenella         | IschemicStroke      | Inverse variance weighted | 10 | 1.0094 | 0.9891 | 1.0302 | 0.3671 | 0.0007  | 0.0175 | 0.9709 | 8.2735 | 0.4072 | -208.5505  |
| log_g_Olsenella         | IschemicStroke      | Simple mode               | 10 | 1.0399 | 0.9893 | 1.0931 | 0.1586 | 0.0007  | 0.0175 | 0.9709 | 8.2735 | 0.4072 | -208.5505  |
| log_g_Olsenella         | IschemicStroke      | Weighted mode             | 10 | 0.9824 | 0.9413 | 1.0253 | 0.4375 | 0.0007  | 0.0175 | 0.9709 | 8.2735 | 0.4072 | -208.5505  |
| log_g_Olsenella         | LargeArteryStroke   | MR Egger                  | 9  | 1.1509 | 0.9020 | 1.4684 | 0.2957 | -0.0798 | 0.0611 | 0.2328 | 4.9131 | 0.7668 | -144.5356  |
| log_g_Olsenella         | LargeArteryStroke   | Weighted median           | 9  | 1.0071 | 0.9217 | 1.1004 | 0.8757 | -0.0798 | 0.0611 | 0.2328 | 4.9131 | 0.7668 | -144.5356  |
| log_g_Olsenella         | LargeArteryStroke   | Inverse variance weighted | 9  | 0.9849 | 0.9193 | 1.0551 | 0.6646 | -0.0798 | 0.0611 | 0.2328 | 4.9131 | 0.7668 | -144.5356  |
| log_g_Olsenella         | LargeArteryStroke   | Simple mode               | 9  | 1.0358 | 0.8984 | 1.1943 | 0.6410 | -0.0798 | 0.0611 | 0.2328 | 4.9131 | 0.7668 | -144.5356  |
| log_g_Olsenella         | LargeArteryStroke   | Weighted mode             | 9  | 1.0348 | 0.9067 | 1.1809 | 0.6258 | -0.0798 | 0.0611 | 0.2328 | 4.9131 | 0.7668 | -144.5356  |
| log_g_Olsenella         | SmallVesselStroke   | MR Egger                  | 10 | 1.0464 | 0.9271 | 1.1809 | 0.4838 | -0.0202 | 0.0312 | 0.5352 | 6.9625 | 0.5407 | -157.0072  |
| log_g_Olsenella         | SmallVesselStroke   | Weighted median           | 10 | 1.0058 | 0.9556 | 1.0585 | 0.8251 | -0.0202 | 0.0312 | 0.5352 | 6.9625 | 0.5407 | -157.0072  |
| log_g_Olsenella         | SmallVesselStroke   | Inverse variance weighted | 10 | 1.0073 | 0.9708 | 1.0451 | 0.7007 | -0.0202 | 0.0312 | 0.5352 | 6.9625 | 0.5407 | -157.0072  |
| log_g_Olsenella         | SmallVesselStroke   | Simple mode               | 10 | 1.0495 | 0.9650 | 1.1415 | 0.2882 | -0.0202 | 0.0312 | 0.5352 | 6.9625 | 0.5407 | -157.0072  |
| log_g_Olsenella         | SmallVesselStroke   | Weighted mode             | 10 | 1.0495 | 0.9649 | 1.1416 | 0.2887 | -0.0202 | 0.0312 | 0.5352 | 6.9625 | 0.5407 | -157.0072  |
| log_g_Olsenella         | Stroke              | MR Egger                  | 11 | 0.9915 | 0.9379 | 1.0481 | 0.7690 | 0.0094  | 0.0141 | 0.5241 | 3.8098 | 0.9235 | -374.6218  |
| log_g_Olsenella         | Stroke              | Weighted median           | 11 | 1.0148 | 0.9929 | 1.0372 | 0.1873 | 0.0094  | 0.0141 | 0.5241 | 3.8098 | 0.9235 | -374.6218  |
| log_g_Olsenella         | Stroke              | Inverse variance weighted | 11 | 1.0094 | 0.9923 | 1.0267 | 0.2829 | 0.0094  | 0.0141 | 0.5241 | 3.8098 | 0.9235 | -374.6218  |
| log_g_Olsenella         | Stroke              | Simple mode               | 11 | 1.0215 | 0.9859 | 1.0583 | 0.2666 | 0.0094  | 0.0141 | 0.5241 | 3.8098 | 0.9235 | -374.6218  |
| log_g_Olsenella         | Stroke              | Weighted mode             | 11 | 1.0212 | 0.9889 | 1.0546 | 0.2294 | 0.0094  | 0.0141 | 0.5241 | 3.8098 | 0.9235 | -374.6218  |
| log_g_Ornithinibacillus | CardioEmbolicStroke | MR Egger                  | 5  | 1.0647 | 0.7169 | 1.5811 | 0.7764 | -0.0666 | 0.1171 | 0.6093 | 4.5076 | 0.2116 | -88.5666   |
| log_g_Ornithinibacillus | CardioEmbolicStroke | Weighted median           | 5  | 0.9353 | 0.8078 | 1.0830 | 0.3713 | -0.0666 | 0.1171 | 0.6093 | 4.5076 | 0.2116 | -88.5666   |
| log_g_Ornithinibacillus | CardioEmbolicStroke | Inverse variance weighted | 5  | 0.9559 | 0.8448 | 1.0816 | 0.4739 | -0.0666 | 0.1171 | 0.6093 | 4.5076 | 0.2116 | -88.5666   |
| log_g_Ornithinibacillus | CardioEmbolicStroke | Simple mode               | 5  | 0.8969 | 0.7327 | 1.0980 | 0.3513 | -0.0666 | 0.1171 | 0.6093 | 4.5076 | 0.2116 | -88.5666   |
| log_g_Ornithinibacillus | CardioEmbolicStroke | Weighted mode             | 5  | 0.9218 | 0.7615 | 1.1159 | 0.4508 | -0.0666 | 0.1171 | 0.6093 | 4.5076 | 0.2116 | -88.5666   |
| log_g_Ornithinibacillus | IschemicStroke      | MR Egger                  | 7  | 0.9859 | 0.9066 | 1.0723 | 0.7542 | 0.0049  | 0.0245 | 0.8485 | 8.9584 | 0.1107 | -129.6833  |
| log_g_Ornithinibacillus | IschemicStroke      | Weighted median           | 7  | 1.0031 | 0.9715 | 1.0358 | 0.8491 | 0.0049  | 0.0245 | 0.8485 | 8.9584 | 0.1107 | -129.6833  |
| log_g_Ornithinibacillus | IschemicStroke      | Inverse variance weighted | 7  | 0.9939 | 0.9659 | 1.0226 | 0.6722 | 0.0049  | 0.0245 | 0.8485 | 8.9584 | 0.1107 | -129.6833  |
| log_g_Ornithinibacillus | IschemicStroke      | Simple mode               | 7  | 0.9977 | 0.9587 | 1.0382 | 0.9137 | 0.0049  | 0.0245 | 0.8485 | 8.9584 | 0.1107 | -129.6833  |
| log_g_Ornithinibacillus | IschemicStroke      | Weighted mode             | 7  | 1.0032 | 0.9684 | 1.0393 | 0.8657 | 0.0049  | 0.0245 | 0.8485 | 8.9584 | 0.1107 | -129.6833  |
| log_g_Ornithinibacillus | LargeArteryStroke   | MR Egger                  | 6  | 0.8952 | 0.7185 | 1.1154 | 0.3797 | 0.0681  | 0.0676 | 0.3708 | 2.0501 | 0.8422 | -153.6334  |
| log_g_Ornithinibacillus | LargeArteryStroke   | Weighted median           | 6  | 0.9809 | 0.8894 | 1.0818 | 0.6988 | 0.0681  | 0.0676 | 0.3708 | 2.0501 | 0.8422 | -153.6334  |
| log_g_Ornithinibacillus | LargeArteryStroke   | Inverse variance weighted | 6  | 0.9949 | 0.9201 | 1.0759 | 0.8989 | 0.0681  | 0.0676 | 0.3708 | 2.0501 | 0.8422 | -153.6334  |
| log_g_Ornithinibacillus | LargeArteryStroke   | Simple mode               | 6  | 0.9511 | 0.8255 | 1.0958 | 0.5185 | 0.0681  | 0.0676 | 0.3708 | 2.0501 | 0.8422 | -153.6334  |
| log_g_Ornithinibacillus | LargeArteryStroke   | Weighted mode             | 6  | 0.9483 | 0.8212 | 1.0949 | 0.5015 | 0.0681  | 0.0676 | 0.3708 | 2.0501 | 0.8422 | -153.6334  |
| log_g_Ornithinibacillus | SmallVesselStroke   | MR Egger                  | 6  | 0.9743 | 0.8625 | 1.1006 | 0.6973 | 0.0167  | 0.0375 | 0.6791 | 1.7763 | 0.7768 | -184.6003  |
| log_g_Ornithinibacillus | SmallVesselStroke   | Weighted median           | 6  | 1.0070 | 0.9534 | 1.0636 | 0.8036 | 0.0167  | 0.0375 | 0.6791 | 1.7763 | 0.7768 | -184.6003  |
| log_g_Ornithinibacillus | SmallVesselStroke   | Inverse variance weighted | 6  | 0.9999 | 0.9574 | 1.0442 | 0.9954 | 0.0167  | 0.0375 | 0.6791 | 1.7763 | 0.7768 | -184.6003  |
| log_g_Ornithinibacillus | SmallVesselStroke   | Simple mode               | 6  | 1.0037 | 0.9369 | 1.0752 | 0.9210 | 0.0167  | 0.0375 | 0.6791 | 1.7763 | 0.7768 | -184.6003  |
| log_g_Ornithinibacillus | SmallVesselStroke   | Weighted mode             | 6  | 1.0057 | 0.9363 | 1.0802 | 0.8827 | 0.0167  | 0.0375 | 0.6791 | 1.7763 | 0.7768 | -184.6003  |
| log_g_Ornithinibacillus | Stroke              | MR Egger                  | 7  | 0.9906 | 0.9268 | 1.0589 | 0.7932 | 0.0078  | 0.0191 | 0.7000 | 7.5914 | 0.1802 | -217.3834  |
| log_g_Ornithinibacillus | Stroke              | Weighted median           | 7  | 1.0082 | 0.9817 | 1.0355 | 0.5475 | 0.0078  | 0.0191 | 0.7000 | 7.5914 | 0.1802 | -217.3834  |
| log_g_Ornithinibacillus | Stroke              | Inverse variance weighted | 7  | 1.0035 | 0.9807 | 1.0268 | 0.7657 | 0.0078  | 0.0191 | 0.7000 | 7.5914 | 0.1802 | -217.3834  |
| log_g_Ornithinibacillus | Stroke              | Simple mode               | 7  | 1.0096 | 0.9711 | 1.0496 | 0.6476 | 0.0078  | 0.0191 | 0.7000 | 7.5914 | 0.1802 | -217.3834  |

|                         |                     |                           |    |        |        |        |        |         |        |        |         |        |             |
|-------------------------|---------------------|---------------------------|----|--------|--------|--------|--------|---------|--------|--------|---------|--------|-------------|
| log_g_Ornithinibacillus | Stroke              | Weighted mode             | 7  | 1.0100 | 0.9719 | 1.0496 | 0.6289 | 0.0078  | 0.0191 | 0.7000 | 7.5914  | 0.1802 | -217.3834   |
| log_g_Paenibacillus     | CardioEmbolicStroke | MR Egger                  | 7  | 1.4081 | 0.9779 | 2.0277 | 0.1252 | -0.1425 | 0.0811 | 0.1391 | 6.3940  | 0.3805 | -183.8243   |
| log_g_Paenibacillus     | CardioEmbolicStroke | Weighted median           | 7  | 0.9588 | 0.8320 | 1.1048 | 0.5603 | -0.1425 | 0.0811 | 0.1391 | 6.3940  | 0.3805 | -183.8243   |
| log_g_Paenibacillus     | CardioEmbolicStroke | Inverse variance weighted | 7  | 1.0298 | 0.9230 | 1.1490 | 0.5986 | -0.1425 | 0.0811 | 0.1391 | 6.3940  | 0.3805 | -183.8243   |
| log_g_Paenibacillus     | CardioEmbolicStroke | Simple mode               | 7  | 0.9257 | 0.7523 | 1.1390 | 0.4929 | -0.1425 | 0.0811 | 0.1391 | 6.3940  | 0.3805 | -183.8243   |
| log_g_Paenibacillus     | CardioEmbolicStroke | Weighted mode             | 7  | 0.9268 | 0.7481 | 1.1481 | 0.5125 | -0.1425 | 0.0811 | 0.1391 | 6.3940  | 0.3805 | -183.8243   |
| log_g_Paenibacillus     | IschemicStroke      | MR Egger                  | 9  | 0.9637 | 0.9021 | 1.0294 | 0.3081 | 0.0088  | 0.0156 | 0.5882 | 5.7134  | 0.5736 | -170.1230   |
| log_g_Paenibacillus     | IschemicStroke      | Weighted median           | 9  | 0.9911 | 0.9625 | 1.0205 | 0.5482 | 0.0088  | 0.0156 | 0.5882 | 5.7134  | 0.5736 | -170.1230   |
| log_g_Paenibacillus     | IschemicStroke      | Inverse variance weighted | 9  | 0.9812 | 0.9597 | 1.0031 | 0.0924 | 0.0088  | 0.0156 | 0.5882 | 5.7134  | 0.5736 | -170.1230   |
| log_g_Paenibacillus     | IschemicStroke      | Simple mode               | 9  | 0.9921 | 0.9494 | 1.0367 | 0.7328 | 0.0088  | 0.0156 | 0.5882 | 5.7134  | 0.5736 | -170.1230   |
| log_g_Paenibacillus     | IschemicStroke      | Weighted mode             | 9  | 0.9921 | 0.9522 | 1.0337 | 0.7150 | 0.0088  | 0.0156 | 0.5882 | 5.7134  | 0.5736 | -170.1230   |
| log_g_Paenibacillus     | LargeArteryStroke   | MR Egger                  | 7  | 0.7735 | 0.5695 | 1.0507 | 0.1612 | 0.0705  | 0.0682 | 0.3488 | 7.8576  | 0.2487 | -210.6765   |
| log_g_Paenibacillus     | LargeArteryStroke   | Weighted median           | 7  | 0.9120 | 0.8139 | 1.0219 | 0.1125 | 0.0705  | 0.0682 | 0.3488 | 7.8576  | 0.2487 | -210.6765   |
| log_g_Paenibacillus     | LargeArteryStroke   | Inverse variance weighted | 7  | 0.9028 | 0.8257 | 0.9871 | 0.0248 | 0.0705  | 0.0682 | 0.3488 | 7.8576  | 0.2487 | -210.6765   |
| log_g_Paenibacillus     | LargeArteryStroke   | Simple mode               | 7  | 0.9151 | 0.7581 | 1.1045 | 0.3908 | 0.0705  | 0.0682 | 0.3488 | 7.8576  | 0.2487 | -210.6765   |
| log_g_Paenibacillus     | LargeArteryStroke   | Weighted mode             | 7  | 0.9179 | 0.7778 | 1.0833 | 0.3500 | 0.0705  | 0.0682 | 0.3488 | 7.8576  | 0.2487 | -210.6765   |
| log_g_Paenibacillus     | SmallVesselStroke   | MR Egger                  | 7  | 1.0503 | 0.9031 | 1.2216 | 0.5522 | -0.0185 | 0.0336 | 0.6053 | 3.7899  | 0.5800 | -862.4730   |
| log_g_Paenibacillus     | SmallVesselStroke   | Weighted median           | 7  | 1.0174 | 0.9617 | 1.0763 | 0.5491 | -0.0185 | 0.0336 | 0.6053 | 3.7899  | 0.5800 | -862.4730   |
| log_g_Paenibacillus     | SmallVesselStroke   | Inverse variance weighted | 7  | 1.0085 | 0.9651 | 1.0538 | 0.7063 | -0.0185 | 0.0336 | 0.6053 | 3.7899  | 0.5800 | -862.4730   |
| log_g_Paenibacillus     | SmallVesselStroke   | Simple mode               | 7  | 1.0235 | 0.9412 | 1.1130 | 0.6063 | -0.0185 | 0.0336 | 0.6053 | 3.7899  | 0.5800 | -862.4730   |
| log_g_Paenibacillus     | SmallVesselStroke   | Weighted mode             | 7  | 1.0290 | 0.9469 | 1.1182 | 0.5254 | -0.0185 | 0.0336 | 0.6053 | 3.7899  | 0.5800 | -862.4730   |
| log_g_Paenibacillus     | Stroke              | MR Egger                  | 10 | 0.9800 | 0.9282 | 1.0346 | 0.4855 | 0.0018  | 0.0127 | 0.8927 | 7.1609  | 0.5194 | -267.6289   |
| log_g_Paenibacillus     | Stroke              | Weighted median           | 10 | 0.9937 | 0.9689 | 1.0192 | 0.6261 | 0.0018  | 0.0127 | 0.8927 | 7.1609  | 0.5194 | -267.6289   |
| log_g_Paenibacillus     | Stroke              | Inverse variance weighted | 10 | 0.9835 | 0.9658 | 1.0016 | 0.0739 | 0.0018  | 0.0127 | 0.8927 | 7.1609  | 0.5194 | -267.6289   |
| log_g_Paenibacillus     | Stroke              | Simple mode               | 10 | 0.9985 | 0.9622 | 1.0361 | 0.9375 | 0.0018  | 0.0127 | 0.8927 | 7.1609  | 0.5194 | -267.6289   |
| log_g_Paenibacillus     | Stroke              | Weighted mode             | 10 | 0.9993 | 0.9627 | 1.0373 | 0.9720 | 0.0018  | 0.0127 | 0.8927 | 7.1609  | 0.5194 | -267.6289   |
| log_g_Pantoea           | CardioEmbolicStroke | MR Egger                  | 7  | 0.8618 | 0.3686 | 2.0150 | 0.7454 | 0.0364  | 0.1649 | 0.8339 | 2.8911  | 0.7168 | -33731.2267 |
| log_g_Pantoea           | CardioEmbolicStroke | Weighted median           | 7  | 0.9185 | 0.8043 | 1.0491 | 0.2101 | 0.0364  | 0.1649 | 0.8339 | 2.8911  | 0.7168 | -33731.2267 |
| log_g_Pantoea           | CardioEmbolicStroke | Inverse variance weighted | 7  | 0.9477 | 0.8548 | 1.0508 | 0.3079 | 0.0364  | 0.1649 | 0.8339 | 2.8911  | 0.7168 | -33731.2267 |
| log_g_Pantoea           | CardioEmbolicStroke | Simple mode               | 7  | 0.8849 | 0.7232 | 1.0828 | 0.2799 | 0.0364  | 0.1649 | 0.8339 | 2.8911  | 0.7168 | -33731.2267 |
| log_g_Pantoea           | CardioEmbolicStroke | Weighted mode             | 7  | 0.8901 | 0.7381 | 1.0734 | 0.2686 | 0.0364  | 0.1649 | 0.8339 | 2.8911  | 0.7168 | -33731.2267 |
| log_g_Pantoea           | IschemicStroke      | MR Egger                  | 8  | 0.9803 | 0.9039 | 1.0632 | 0.6480 | 0.0065  | 0.0172 | 0.7186 | 7.4244  | 0.2834 | -1213.8632  |
| log_g_Pantoea           | IschemicStroke      | Weighted median           | 8  | 0.9961 | 0.9678 | 1.0252 | 0.7890 | 0.0065  | 0.0172 | 0.7186 | 7.4244  | 0.2834 | -1213.8632  |
| log_g_Pantoea           | IschemicStroke      | Inverse variance weighted | 8  | 0.9951 | 0.9731 | 1.0176 | 0.6649 | 0.0065  | 0.0172 | 0.7186 | 7.4244  | 0.2834 | -1213.8632  |
| log_g_Pantoea           | IschemicStroke      | Simple mode               | 8  | 0.9878 | 0.9455 | 1.0320 | 0.5985 | 0.0065  | 0.0172 | 0.7186 | 7.4244  | 0.2834 | -1213.8632  |
| log_g_Pantoea           | IschemicStroke      | Weighted mode             | 8  | 0.9959 | 0.9560 | 1.0375 | 0.8501 | 0.0065  | 0.0172 | 0.7186 | 7.4244  | 0.2834 | -1213.8632  |
| log_g_Pantoea           | LargeArteryStroke   | MR Egger                  | 8  | 0.9983 | 0.7085 | 1.4067 | 0.9926 | -0.0060 | 0.0726 | 0.9363 | 12.3097 | 0.0554 | -136.2480   |
| log_g_Pantoea           | LargeArteryStroke   | Weighted median           | 8  | 1.0088 | 0.9159 | 1.1112 | 0.8583 | -0.0060 | 0.0726 | 0.9363 | 12.3097 | 0.0554 | -136.2480   |
| log_g_Pantoea           | LargeArteryStroke   | Inverse variance weighted | 8  | 0.9845 | 0.8977 | 1.0796 | 0.7396 | -0.0060 | 0.0726 | 0.9363 | 12.3097 | 0.0554 | -136.2480   |
| log_g_Pantoea           | LargeArteryStroke   | Simple mode               | 8  | 1.0005 | 0.8846 | 1.1315 | 0.9944 | -0.0060 | 0.0726 | 0.9363 | 12.3097 | 0.0554 | -136.2480   |
| log_g_Pantoea           | LargeArteryStroke   | Weighted mode             | 8  | 1.0151 | 0.9028 | 1.1414 | 0.8091 | -0.0060 | 0.0726 | 0.9363 | 12.3097 | 0.0554 | -136.2480   |
| log_g_Pantoea           | SmallVesselStroke   | MR Egger                  | 8  | 1.0454 | 0.9130 | 1.1970 | 0.5440 | -0.0145 | 0.0288 | 0.6323 | 6.3293  | 0.3873 | -532.2268   |
| log_g_Pantoea           | SmallVesselStroke   | Weighted median           | 8  | 0.9986 | 0.9495 | 1.0502 | 0.9568 | -0.0145 | 0.0288 | 0.6323 | 6.3293  | 0.3873 | -532.2268   |
| log_g_Pantoea           | SmallVesselStroke   | Inverse variance weighted | 8  | 1.0112 | 0.9729 | 1.0510 | 0.5717 | -0.0145 | 0.0288 | 0.6323 | 6.3293  | 0.3873 | -532.2268   |
| log_g_Pantoea           | SmallVesselStroke   | Simple mode               | 8  | 0.9836 | 0.9046 | 1.0696 | 0.7110 | -0.0145 | 0.0288 | 0.6323 | 6.3293  | 0.3873 | -532.2268   |
| log_g_Pantoea           | SmallVesselStroke   | Weighted mode             | 8  | 0.9885 | 0.9146 | 1.0685 | 0.7798 | -0.0145 | 0.0288 | 0.6323 | 6.3293  | 0.3873 | -532.2268   |
| log_g_Pantoea           | Stroke              | MR Egger                  | 9  | 0.9983 | 0.9399 | 1.0602 | 0.9566 | 0.0033  | 0.0129 | 0.8069 | 5.9311  | 0.5478 | -825.9922   |
| log_g_Pantoea           | Stroke              | Weighted median           | 9  | 1.0098 | 0.9855 | 1.0348 | 0.4327 | 0.0033  | 0.0129 | 0.8069 | 5.9311  | 0.5478 | -825.9922   |
| log_g_Pantoea           | Stroke              | Inverse variance weighted | 9  | 1.0057 | 0.9870 | 1.0247 | 0.5529 | 0.0033  | 0.0129 | 0.8069 | 5.9311  | 0.5478 | -825.9922   |
| log_g_Pantoea           | Stroke              | Simple mode               | 9  | 1.0181 | 0.9829 | 1.0545 | 0.3475 | 0.0033  | 0.0129 | 0.8069 | 5.9311  | 0.5478 | -825.9922   |
| log_g_Pantoea           | Stroke              | Weighted mode             | 9  | 1.0124 | 0.9808 | 1.0449 | 0.4684 | 0.0033  | 0.0129 | 0.8069 | 5.9311  | 0.5478 | -825.9922   |
| log_g_Pectobacterium    | CardioEmbolicStroke | MR Egger                  | 10 | 1.0118 | 0.7118 | 1.4382 | 0.9495 | -0.0105 | 0.0719 | 0.8879 | 2.7829  | 0.9472 | -420.5661   |
| log_g_Pectobacterium    | CardioEmbolicStroke | Weighted median           | 10 | 0.9903 | 0.8844 | 1.1088 | 0.8657 | -0.0105 | 0.0719 | 0.8879 | 2.7829  | 0.9472 | -420.5661   |

|                        |                     |                           |    |        |        |        |        |         |        |        |         |        |            |
|------------------------|---------------------|---------------------------|----|--------|--------|--------|--------|---------|--------|--------|---------|--------|------------|
| log_g_Pectobacterium   | CardioEmbolicStroke | Inverse variance weighted | 10 | 0.9866 | 0.9022 | 1.0789 | 0.7670 | -0.0105 | 0.0719 | 0.8879 | 2.7829  | 0.9472 | -420.5661  |
| log_g_Pectobacterium   | CardioEmbolicStroke | Simple mode               | 10 | 0.9923 | 0.8308 | 1.1853 | 0.9343 | -0.0105 | 0.0719 | 0.8879 | 2.7829  | 0.9472 | -420.5661  |
| log_g_Pectobacterium   | CardioEmbolicStroke | Weighted mode             | 10 | 0.9890 | 0.8365 | 1.1693 | 0.8999 | -0.0105 | 0.0719 | 0.8879 | 2.7829  | 0.9472 | -420.5661  |
| log_g_Pectobacterium   | IschemicStroke      | MR Egger                  | 10 | 1.0206 | 0.9314 | 1.1184 | 0.6733 | -0.0008 | 0.0187 | 0.9656 | 10.2185 | 0.2500 | -760.4186  |
| log_g_Pectobacterium   | IschemicStroke      | Weighted median           | 10 | 1.0264 | 0.9974 | 1.0562 | 0.0743 | -0.0008 | 0.0187 | 0.9656 | 10.2185 | 0.2500 | -760.4186  |
| log_g_Pectobacterium   | IschemicStroke      | Inverse variance weighted | 10 | 1.0186 | 0.9965 | 1.0412 | 0.0998 | -0.0008 | 0.0187 | 0.9656 | 10.2185 | 0.2500 | -760.4186  |
| log_g_Pectobacterium   | IschemicStroke      | Simple mode               | 10 | 1.0377 | 0.9863 | 1.0917 | 0.1870 | -0.0008 | 0.0187 | 0.9656 | 10.2185 | 0.2500 | -760.4186  |
| log_g_Pectobacterium   | IschemicStroke      | Weighted mode             | 10 | 1.0367 | 0.9870 | 1.0889 | 0.1839 | -0.0008 | 0.0187 | 0.9656 | 10.2185 | 0.2500 | -760.4186  |
| log_g_Pectobacterium   | LargeArteryStroke   | MR Egger                  | 10 | 0.8709 | 0.6698 | 1.1324 | 0.3323 | 0.0476  | 0.0537 | 0.4015 | 5.6498  | 0.6864 | -255.0722  |
| log_g_Pectobacterium   | LargeArteryStroke   | Weighted median           | 10 | 0.9758 | 0.8920 | 1.0676 | 0.5937 | 0.0476  | 0.0537 | 0.4015 | 5.6498  | 0.6864 | -255.0722  |
| log_g_Pectobacterium   | LargeArteryStroke   | Inverse variance weighted | 10 | 0.9768 | 0.9136 | 1.0444 | 0.4918 | 0.0476  | 0.0537 | 0.4015 | 5.6498  | 0.6864 | -255.0722  |
| log_g_Pectobacterium   | LargeArteryStroke   | Simple mode               | 10 | 0.9787 | 0.8433 | 1.1357 | 0.7827 | 0.0476  | 0.0537 | 0.4015 | 5.6498  | 0.6864 | -255.0722  |
| log_g_Pectobacterium   | LargeArteryStroke   | Weighted mode             | 10 | 0.9787 | 0.8491 | 1.1280 | 0.7726 | 0.0476  | 0.0537 | 0.4015 | 5.6498  | 0.6864 | -255.0722  |
| log_g_Pectobacterium   | SmallVesselStroke   | MR Egger                  | 10 | 0.9994 | 0.8511 | 1.1734 | 0.9939 | 0.0050  | 0.0329 | 0.8819 | 9.8023  | 0.2792 | -487.3862  |
| log_g_Pectobacterium   | SmallVesselStroke   | Weighted median           | 10 | 1.0179 | 0.9687 | 1.0697 | 0.4822 | 0.0050  | 0.0329 | 0.8819 | 9.8023  | 0.2792 | -487.3862  |
| log_g_Pectobacterium   | SmallVesselStroke   | Inverse variance weighted | 10 | 1.0116 | 0.9732 | 1.0515 | 0.5601 | 0.0050  | 0.0329 | 0.8819 | 9.8023  | 0.2792 | -487.3862  |
| log_g_Pectobacterium   | SmallVesselStroke   | Simple mode               | 10 | 1.0499 | 0.9657 | 1.1414 | 0.2831 | 0.0050  | 0.0329 | 0.8819 | 9.8023  | 0.2792 | -487.3862  |
| log_g_Pectobacterium   | SmallVesselStroke   | Weighted mode             | 10 | 1.0508 | 0.9684 | 1.1402 | 0.2645 | 0.0050  | 0.0329 | 0.8819 | 9.8023  | 0.2792 | -487.3862  |
| log_g_Pectobacterium   | Stroke              | MR Egger                  | 10 | 1.0279 | 0.9577 | 1.1032 | 0.4678 | -0.0040 | 0.0144 | 0.7900 | 7.4004  | 0.4941 | -1025.4382 |
| log_g_Pectobacterium   | Stroke              | Weighted median           | 10 | 1.0181 | 0.9948 | 1.0419 | 0.1293 | -0.0040 | 0.0144 | 0.7900 | 7.4004  | 0.4941 | -1025.4382 |
| log_g_Pectobacterium   | Stroke              | Inverse variance weighted | 10 | 1.0180 | 1.0003 | 1.0361 | 0.0459 | -0.0040 | 0.0144 | 0.7900 | 7.4004  | 0.4941 | -1025.4382 |
| log_g_Pectobacterium   | Stroke              | Simple mode               | 10 | 1.0155 | 0.9748 | 1.0579 | 0.4794 | -0.0040 | 0.0144 | 0.7900 | 7.4004  | 0.4941 | -1025.4382 |
| log_g_Pectobacterium   | Stroke              | Weighted mode             | 10 | 1.0125 | 0.9719 | 1.0548 | 0.5660 | -0.0040 | 0.0144 | 0.7900 | 7.4004  | 0.4941 | -1025.4382 |
| log_g_Pseudoramibacter | CardioEmbolicStroke | Inverse variance weighted | 2  | 0.8687 | 0.7047 | 1.0708 | 0.1872 | NA      | NA     | NA     | 0.2515  | 0.6160 | 177.1014   |
| log_g_Pseudoramibacter | IschemicStroke      | MR Egger                  | 3  | 0.9496 | 0.6986 | 1.2908 | 0.7971 | 0.0124  | 0.0778 | 0.8997 | 4.4758  | 0.0344 | -1882.7261 |
| log_g_Pseudoramibacter | IschemicStroke      | Weighted median           | 3  | 0.9928 | 0.9360 | 1.0530 | 0.8087 | 0.0124  | 0.0778 | 0.8997 | 4.4758  | 0.0344 | -1882.7261 |
| log_g_Pseudoramibacter | IschemicStroke      | Inverse variance weighted | 3  | 0.9725 | 0.9113 | 1.0378 | 0.4002 | 0.0124  | 0.0778 | 0.8997 | 4.4758  | 0.0344 | -1882.7261 |
| log_g_Pseudoramibacter | IschemicStroke      | Simple mode               | 3  | 1.0113 | 0.9369 | 1.0916 | 0.8003 | 0.0124  | 0.0778 | 0.8997 | 4.4758  | 0.0344 | -1882.7261 |
| log_g_Pseudoramibacter | IschemicStroke      | Weighted mode             | 3  | 1.0099 | 0.9352 | 1.0906 | 0.8249 | 0.0124  | 0.0778 | 0.8997 | 4.4758  | 0.0344 | -1882.7261 |
| log_g_Pseudoramibacter | LargeArteryStroke   | Inverse variance weighted | 2  | 0.9830 | 0.8415 | 1.1483 | 0.8288 | NA      | NA     | NA     | 0.5023  | 0.4785 | 618.8787   |
| log_g_Pseudoramibacter | SmallVesselStroke   | Inverse variance weighted | 2  | 0.9751 | 0.8942 | 1.0633 | 0.5678 | NA      | NA     | NA     | 0.2081  | 0.6483 | 1173.2681  |
| log_g_Pseudoramibacter | Stroke              | MR Egger                  | 5  | 0.9833 | 0.8599 | 1.1244 | 0.8216 | 0.0028  | 0.0349 | 0.9415 | 6.4463  | 0.0918 | -622.9270  |
| log_g_Pseudoramibacter | Stroke              | Weighted median           | 5  | 1.0061 | 0.9637 | 1.0503 | 0.7831 | 0.0028  | 0.0349 | 0.9415 | 6.4463  | 0.0918 | -622.9270  |
| log_g_Pseudoramibacter | Stroke              | Inverse variance weighted | 5  | 0.9884 | 0.9505 | 1.0278 | 0.5578 | 0.0028  | 0.0349 | 0.9415 | 6.4463  | 0.0918 | -622.9270  |
| log_g_Pseudoramibacter | Stroke              | Simple mode               | 5  | 1.0133 | 0.9583 | 1.0714 | 0.6668 | 0.0028  | 0.0349 | 0.9415 | 6.4463  | 0.0918 | -622.9270  |
| log_g_Pseudoramibacter | Stroke              | Weighted mode             | 5  | 1.0122 | 0.9559 | 1.0719 | 0.6994 | 0.0028  | 0.0349 | 0.9415 | 6.4463  | 0.0918 | -622.9270  |
| log_g_Rahnella         | CardioEmbolicStroke | MR Egger                  | 9  | 0.8182 | 0.4901 | 1.3659 | 0.4679 | 0.1088  | 0.1044 | 0.3320 | 11.3592 | 0.1822 | -223.5678  |
| log_g_Rahnella         | CardioEmbolicStroke | Weighted median           | 9  | 0.9926 | 0.8665 | 1.1371 | 0.9148 | 0.1088  | 0.1044 | 0.3320 | 11.3592 | 0.1822 | -223.5678  |
| log_g_Rahnella         | CardioEmbolicStroke | Inverse variance weighted | 9  | 1.0678 | 0.9573 | 1.1910 | 0.2394 | 0.1088  | 0.1044 | 0.3320 | 11.3592 | 0.1822 | -223.5678  |
| log_g_Rahnella         | CardioEmbolicStroke | Simple mode               | 9  | 0.9575 | 0.7492 | 1.2238 | 0.7376 | 0.1088  | 0.1044 | 0.3320 | 11.3592 | 0.1822 | -223.5678  |
| log_g_Rahnella         | CardioEmbolicStroke | Weighted mode             | 9  | 0.9575 | 0.7778 | 1.1788 | 0.6930 | 0.1088  | 0.1044 | 0.3320 | 11.3592 | 0.1822 | -223.5678  |
| log_g_Rahnella         | IschemicStroke      | MR Egger                  | 13 | 0.9803 | 0.8955 | 1.0731 | 0.6744 | 0.0139  | 0.0194 | 0.4867 | 15.7685 | 0.1499 | -328.5952  |
| log_g_Rahnella         | IschemicStroke      | Weighted median           | 13 | 1.0091 | 0.9841 | 1.0347 | 0.4793 | 0.0139  | 0.0194 | 0.4867 | 15.7685 | 0.1499 | -328.5952  |
| log_g_Rahnella         | IschemicStroke      | Inverse variance weighted | 13 | 1.0124 | 0.9910 | 1.0343 | 0.2589 | 0.0139  | 0.0194 | 0.4867 | 15.7685 | 0.1499 | -328.5952  |
| log_g_Rahnella         | IschemicStroke      | Simple mode               | 13 | 1.0098 | 0.9721 | 1.0489 | 0.6245 | 0.0139  | 0.0194 | 0.4867 | 15.7685 | 0.1499 | -328.5952  |
| log_g_Rahnella         | IschemicStroke      | Weighted mode             | 13 | 1.0093 | 0.9757 | 1.0441 | 0.6016 | 0.0139  | 0.0194 | 0.4867 | 15.7685 | 0.1499 | -328.5952  |
| log_g_Rahnella         | LargeArteryStroke   | MR Egger                  | 9  | 0.8299 | 0.6020 | 1.1442 | 0.2926 | 0.0810  | 0.0655 | 0.2557 | 5.7613  | 0.6739 | -454.2296  |
| log_g_Rahnella         | LargeArteryStroke   | Weighted median           | 9  | 1.0290 | 0.9429 | 1.1229 | 0.5219 | 0.0810  | 0.0655 | 0.2557 | 5.7613  | 0.6739 | -454.2296  |
| log_g_Rahnella         | LargeArteryStroke   | Inverse variance weighted | 9  | 1.0118 | 0.9451 | 1.0832 | 0.7364 | 0.0810  | 0.0655 | 0.2557 | 5.7613  | 0.6739 | -454.2296  |
| log_g_Rahnella         | LargeArteryStroke   | Simple mode               | 9  | 1.0635 | 0.9231 | 1.2253 | 0.4191 | 0.0810  | 0.0655 | 0.2557 | 5.7613  | 0.6739 | -454.2296  |
| log_g_Rahnella         | LargeArteryStroke   | Weighted mode             | 9  | 1.0613 | 0.9223 | 1.2211 | 0.4304 | 0.0810  | 0.0655 | 0.2557 | 5.7613  | 0.6739 | -454.2296  |
| log_g_Rahnella         | SmallVesselStroke   | MR Egger                  | 9  | 0.9089 | 0.7597 | 1.0873 | 0.3309 | 0.0418  | 0.0365 | 0.2896 | 8.0301  | 0.4305 | -991.0250  |
| log_g_Rahnella         | SmallVesselStroke   | Weighted median           | 9  | 1.0015 | 0.9528 | 1.0528 | 0.9516 | 0.0418  | 0.0365 | 0.2896 | 8.0301  | 0.4305 | -991.0250  |

|                   |                     |                           |    |        |        |        |        |         |        |        |         |        |             |
|-------------------|---------------------|---------------------------|----|--------|--------|--------|--------|---------|--------|--------|---------|--------|-------------|
| log_g_Rahnella    | SmallVesselStroke   | Inverse variance weighted | 9  | 1.0069 | 0.9692 | 1.0460 | 0.7242 | 0.0418  | 0.0365 | 0.2896 | 8.0301  | 0.4305 | -991.0250   |
| log_g_Rahnella    | SmallVesselStroke   | Simple mode               | 9  | 1.0105 | 0.9405 | 1.0856 | 0.7831 | 0.0418  | 0.0365 | 0.2896 | 8.0301  | 0.4305 | -991.0250   |
| log_g_Rahnella    | SmallVesselStroke   | Weighted mode             | 9  | 1.0105 | 0.9430 | 1.0828 | 0.7752 | 0.0418  | 0.0365 | 0.2896 | 8.0301  | 0.4305 | -991.0250   |
| log_g_Rahnella    | Stroke              | MR Egger                  | 14 | 1.0017 | 0.9348 | 1.0734 | 0.9619 | 0.0040  | 0.0149 | 0.7956 | 15.1722 | 0.2322 | -141.2309   |
| log_g_Rahnella    | Stroke              | Weighted median           | 14 | 1.0101 | 0.9882 | 1.0323 | 0.3691 | 0.0040  | 0.0149 | 0.7956 | 15.1722 | 0.2322 | -141.2309   |
| log_g_Rahnella    | Stroke              | Inverse variance weighted | 14 | 1.0108 | 0.9941 | 1.0278 | 0.2054 | 0.0040  | 0.0149 | 0.7956 | 15.1722 | 0.2322 | -141.2309   |
| log_g_Rahnella    | Stroke              | Simple mode               | 14 | 1.0120 | 0.9783 | 1.0468 | 0.5033 | 0.0040  | 0.0149 | 0.7956 | 15.1722 | 0.2322 | -141.2309   |
| log_g_Rahnella    | Stroke              | Weighted mode             | 14 | 1.0106 | 0.9788 | 1.0434 | 0.5292 | 0.0040  | 0.0149 | 0.7956 | 15.1722 | 0.2322 | -141.2309   |
| log_g_Selenomonas | CardioEmbolicStroke | MR Egger                  | 6  | 1.1780 | 0.7202 | 1.9268 | 0.5496 | -0.0671 | 0.1037 | 0.5530 | 0.8727  | 0.9722 | -3047.3961  |
| log_g_Selenomonas | CardioEmbolicStroke | Weighted median           | 6  | 0.9996 | 0.8714 | 1.1465 | 0.9949 | -0.0671 | 0.1037 | 0.5530 | 0.8727  | 0.9722 | -3047.3961  |
| log_g_Selenomonas | CardioEmbolicStroke | Inverse variance weighted | 6  | 1.0059 | 0.8975 | 1.1274 | 0.9198 | -0.0671 | 0.1037 | 0.5530 | 0.8727  | 0.9722 | -3047.3961  |
| log_g_Selenomonas | CardioEmbolicStroke | Simple mode               | 6  | 1.0063 | 0.8327 | 1.2160 | 0.9507 | -0.0671 | 0.1037 | 0.5530 | 0.8727  | 0.9722 | -3047.3961  |
| log_g_Selenomonas | CardioEmbolicStroke | Weighted mode             | 6  | 1.0015 | 0.8366 | 1.1988 | 0.9878 | -0.0671 | 0.1037 | 0.5530 | 0.8727  | 0.9722 | -3047.3961  |
| log_g_Selenomonas | IschemicStroke      | MR Egger                  | 8  | 1.0570 | 0.9590 | 1.1651 | 0.3070 | -0.0272 | 0.0220 | 0.2619 | 11.1027 | 0.1342 | -196.2991   |
| log_g_Selenomonas | IschemicStroke      | Weighted median           | 8  | 1.0097 | 0.9770 | 1.0435 | 0.5663 | -0.0272 | 0.0220 | 0.2619 | 11.1027 | 0.1342 | -196.2991   |
| log_g_Selenomonas | IschemicStroke      | Inverse variance weighted | 8  | 0.9968 | 0.9671 | 1.0274 | 0.8342 | -0.0272 | 0.0220 | 0.2619 | 11.1027 | 0.1342 | -196.2991   |
| log_g_Selenomonas | IschemicStroke      | Simple mode               | 8  | 1.0116 | 0.9592 | 1.0668 | 0.6836 | -0.0272 | 0.0220 | 0.2619 | 11.1027 | 0.1342 | -196.2991   |
| log_g_Selenomonas | IschemicStroke      | Weighted mode             | 8  | 1.0109 | 0.9645 | 1.0594 | 0.6658 | -0.0272 | 0.0220 | 0.2619 | 11.1027 | 0.1342 | -196.2991   |
| log_g_Selenomonas | LargeArteryStroke   | MR Egger                  | 7  | 0.8171 | 0.5907 | 1.1305 | 0.2771 | 0.0773  | 0.0722 | 0.3333 | 8.3883  | 0.2110 | -148.5486   |
| log_g_Selenomonas | LargeArteryStroke   | Weighted median           | 7  | 0.9894 | 0.8885 | 1.1018 | 0.8461 | 0.0773  | 0.0722 | 0.3333 | 8.3883  | 0.2110 | -148.5486   |
| log_g_Selenomonas | LargeArteryStroke   | Inverse variance weighted | 7  | 0.9685 | 0.8817 | 1.0638 | 0.5036 | 0.0773  | 0.0722 | 0.3333 | 8.3883  | 0.2110 | -148.5486   |
| log_g_Selenomonas | LargeArteryStroke   | Simple mode               | 7  | 1.0536 | 0.8689 | 1.2776 | 0.6143 | 0.0773  | 0.0722 | 0.3333 | 8.3883  | 0.2110 | -148.5486   |
| log_g_Selenomonas | LargeArteryStroke   | Weighted mode             | 7  | 1.0587 | 0.8901 | 1.2593 | 0.5428 | 0.0773  | 0.0722 | 0.3333 | 8.3883  | 0.2110 | -148.5486   |
| log_g_Selenomonas | SmallVesselStroke   | MR Egger                  | 7  | 1.2181 | 0.9781 | 1.5170 | 0.1383 | -0.0775 | 0.0487 | 0.1728 | 15.0065 | 0.0202 | -241.0961   |
| log_g_Selenomonas | SmallVesselStroke   | Weighted median           | 7  | 1.0184 | 0.9548 | 1.0863 | 0.5789 | -0.0775 | 0.0487 | 0.1728 | 15.0065 | 0.0202 | -241.0961   |
| log_g_Selenomonas | SmallVesselStroke   | Inverse variance weighted | 7  | 1.0270 | 0.9577 | 1.1014 | 0.4545 | -0.0775 | 0.0487 | 0.1728 | 15.0065 | 0.0202 | -241.0961   |
| log_g_Selenomonas | SmallVesselStroke   | Simple mode               | 7  | 1.0467 | 0.9420 | 1.1630 | 0.4289 | -0.0775 | 0.0487 | 0.1728 | 15.0065 | 0.0202 | -241.0961   |
| log_g_Selenomonas | SmallVesselStroke   | Weighted mode             | 7  | 1.0327 | 0.9439 | 1.1298 | 0.5090 | -0.0775 | 0.0487 | 0.1728 | 15.0065 | 0.0202 | -241.0961   |
| log_g_Selenomonas | Stroke              | MR Egger                  | 10 | 1.0334 | 0.9612 | 1.1110 | 0.4001 | -0.0171 | 0.0164 | 0.3265 | 10.5031 | 0.3113 | -318.4823   |
| log_g_Selenomonas | Stroke              | Weighted median           | 10 | 1.0099 | 0.9818 | 1.0387 | 0.4948 | -0.0171 | 0.0164 | 0.3265 | 10.5031 | 0.3113 | -318.4823   |
| log_g_Selenomonas | Stroke              | Inverse variance weighted | 10 | 0.9959 | 0.9750 | 1.0173 | 0.7057 | -0.0171 | 0.0164 | 0.3265 | 10.5031 | 0.3113 | -318.4823   |
| log_g_Selenomonas | Stroke              | Simple mode               | 10 | 1.0121 | 0.9686 | 1.0576 | 0.6033 | -0.0171 | 0.0164 | 0.3265 | 10.5031 | 0.3113 | -318.4823   |
| log_g_Selenomonas | Stroke              | Weighted mode             | 10 | 1.0150 | 0.9770 | 1.0544 | 0.4640 | -0.0171 | 0.0164 | 0.3265 | 10.5031 | 0.3113 | -318.4823   |
| log_g_Serratia    | CardioEmbolicStroke | MR Egger                  | 7  | 2.0322 | 0.6227 | 6.6324 | 0.2929 | -0.2989 | 0.2507 | 0.2867 | 5.3930  | 0.4945 | -3406.8904  |
| log_g_Serratia    | CardioEmbolicStroke | Weighted median           | 7  | 1.0033 | 0.8755 | 1.1499 | 0.9620 | -0.2989 | 0.2507 | 0.2867 | 5.3930  | 0.4945 | -3406.8904  |
| log_g_Serratia    | CardioEmbolicStroke | Inverse variance weighted | 7  | 0.9924 | 0.8956 | 1.0997 | 0.8843 | -0.2989 | 0.2507 | 0.2867 | 5.3930  | 0.4945 | -3406.8904  |
| log_g_Serratia    | CardioEmbolicStroke | Simple mode               | 7  | 1.0374 | 0.8516 | 1.2637 | 0.7280 | -0.2989 | 0.2507 | 0.2867 | 5.3930  | 0.4945 | -3406.8904  |
| log_g_Serratia    | CardioEmbolicStroke | Weighted mode             | 7  | 1.0067 | 0.8323 | 1.2176 | 0.9477 | -0.2989 | 0.2507 | 0.2867 | 5.3930  | 0.4945 | -3406.8904  |
| log_g_Serratia    | IschemicStroke      | MR Egger                  | 7  | 0.9210 | 0.6931 | 1.2238 | 0.5949 | 0.0254  | 0.0602 | 0.6909 | 5.4368  | 0.3649 | -15348.6513 |
| log_g_Serratia    | IschemicStroke      | Weighted median           | 7  | 0.9797 | 0.9488 | 1.0116 | 0.2097 | 0.0254  | 0.0602 | 0.6909 | 5.4368  | 0.3649 | -15348.6513 |
| log_g_Serratia    | IschemicStroke      | Inverse variance weighted | 7  | 0.9788 | 0.9559 | 1.0023 | 0.0762 | 0.0254  | 0.0602 | 0.6909 | 5.4368  | 0.3649 | -15348.6513 |
| log_g_Serratia    | IschemicStroke      | Simple mode               | 7  | 0.9934 | 0.9412 | 1.0485 | 0.8178 | 0.0254  | 0.0602 | 0.6909 | 5.4368  | 0.3649 | -15348.6513 |
| log_g_Serratia    | IschemicStroke      | Weighted mode             | 7  | 1.0006 | 0.9501 | 1.0538 | 0.9823 | 0.0254  | 0.0602 | 0.6909 | 5.4368  | 0.3649 | -15348.6513 |
| log_g_Serratia    | LargeArteryStroke   | MR Egger                  | 7  | 0.9673 | 0.3991 | 2.3443 | 0.9441 | 0.0210  | 0.1877 | 0.9153 | 2.5190  | 0.7736 | -7767.0180  |
| log_g_Serratia    | LargeArteryStroke   | Weighted median           | 7  | 1.0283 | 0.9353 | 1.1306 | 0.5633 | 0.0210  | 0.1877 | 0.9153 | 2.5190  | 0.7736 | -7767.0180  |
| log_g_Serratia    | LargeArteryStroke   | Inverse variance weighted | 7  | 1.0172 | 0.9422 | 1.0982 | 0.6628 | 0.0210  | 0.1877 | 0.9153 | 2.5190  | 0.7736 | -7767.0180  |
| log_g_Serratia    | LargeArteryStroke   | Simple mode               | 7  | 1.0344 | 0.8906 | 1.2015 | 0.6732 | 0.0210  | 0.1877 | 0.9153 | 2.5190  | 0.7736 | -7767.0180  |
| log_g_Serratia    | LargeArteryStroke   | Weighted mode             | 7  | 1.0259 | 0.8918 | 1.1801 | 0.7332 | 0.0210  | 0.1877 | 0.9153 | 2.5190  | 0.7736 | -7767.0180  |
| log_g_Serratia    | SmallVesselStroke   | MR Egger                  | 7  | 0.9382 | 0.4326 | 2.0344 | 0.8779 | 0.0319  | 0.1639 | 0.8533 | 12.3426 | 0.0304 | -6030.6427  |
| log_g_Serratia    | SmallVesselStroke   | Weighted median           | 7  | 0.9995 | 0.9383 | 1.0648 | 0.9883 | 0.0319  | 0.1639 | 0.8533 | 12.3426 | 0.0304 | -6030.6427  |
| log_g_Serratia    | SmallVesselStroke   | Inverse variance weighted | 7  | 1.0128 | 0.9525 | 1.0770 | 0.6844 | 0.0319  | 0.1639 | 0.8533 | 12.3426 | 0.0304 | -6030.6427  |
| log_g_Serratia    | SmallVesselStroke   | Simple mode               | 7  | 0.9496 | 0.8313 | 1.0847 | 0.4748 | 0.0319  | 0.1639 | 0.8533 | 12.3426 | 0.0304 | -6030.6427  |
| log_g_Serratia    | SmallVesselStroke   | Weighted mode             | 7  | 0.9452 | 0.8303 | 1.0761 | 0.4271 | 0.0319  | 0.1639 | 0.8533 | 12.3426 | 0.0304 | -6030.6427  |

|                  |                     |                           |    |        |        |        |        |         |        |        |         |        |             |
|------------------|---------------------|---------------------------|----|--------|--------|--------|--------|---------|--------|--------|---------|--------|-------------|
| log_g_Serratia   | Stroke              | MR Egger                  | 7  | 0.9303 | 0.6960 | 1.2433 | 0.6459 | 0.0253  | 0.0613 | 0.6974 | 7.8301  | 0.1659 | -17184.7525 |
| log_g_Serratia   | Stroke              | Weighted median           | 7  | 0.9720 | 0.9450 | 0.9996 | 0.0470 | 0.0253  | 0.0613 | 0.6974 | 7.8301  | 0.1659 | -17184.7525 |
| log_g_Serratia   | Stroke              | Inverse variance weighted | 7  | 0.9885 | 0.9655 | 1.0121 | 0.3364 | 0.0253  | 0.0613 | 0.6974 | 7.8301  | 0.1659 | -17184.7525 |
| log_g_Serratia   | Stroke              | Simple mode               | 7  | 0.9662 | 0.9187 | 1.0162 | 0.2298 | 0.0253  | 0.0613 | 0.6974 | 7.8301  | 0.1659 | -17184.7525 |
| log_g_Serratia   | Stroke              | Weighted mode             | 7  | 0.9652 | 0.9141 | 1.0192 | 0.2496 | 0.0253  | 0.0613 | 0.6974 | 7.8301  | 0.1659 | -17184.7525 |
| log_g_Shewanella | CardioEmbolicStroke | MR Egger                  | 6  | 0.9762 | 0.6315 | 1.5092 | 0.9190 | 0.0325  | 0.1000 | 0.7616 | 5.5450  | 0.2358 | -243.7460   |
| log_g_Shewanella | CardioEmbolicStroke | Weighted median           | 6  | 1.0573 | 0.9160 | 1.2204 | 0.4462 | 0.0325  | 0.1000 | 0.7616 | 5.5450  | 0.2358 | -243.7460   |
| log_g_Shewanella | CardioEmbolicStroke | Inverse variance weighted | 6  | 1.0459 | 0.9302 | 1.1759 | 0.4530 | 0.0325  | 0.1000 | 0.7616 | 5.5450  | 0.2358 | -243.7460   |
| log_g_Shewanella | CardioEmbolicStroke | Simple mode               | 6  | 1.0491 | 0.8229 | 1.3374 | 0.7149 | 0.0325  | 0.1000 | 0.7616 | 5.5450  | 0.2358 | -243.7460   |
| log_g_Shewanella | CardioEmbolicStroke | Weighted mode             | 6  | 1.0588 | 0.8592 | 1.3048 | 0.6147 | 0.0325  | 0.1000 | 0.7616 | 5.5450  | 0.2358 | -243.7460   |
| log_g_Shewanella | IschemicStroke      | MR Egger                  | 6  | 0.9867 | 0.8267 | 1.1776 | 0.8891 | -0.0036 | 0.0408 | 0.9334 | 17.6680 | 0.0014 | -784.5493   |
| log_g_Shewanella | IschemicStroke      | Weighted median           | 6  | 0.9978 | 0.9651 | 1.0317 | 0.8990 | -0.0036 | 0.0408 | 0.9334 | 17.6680 | 0.0014 | -784.5493   |
| log_g_Shewanella | IschemicStroke      | Inverse variance weighted | 6  | 0.9792 | 0.9336 | 1.0269 | 0.3860 | -0.0036 | 0.0408 | 0.9334 | 17.6680 | 0.0014 | -784.5493   |
| log_g_Shewanella | IschemicStroke      | Simple mode               | 6  | 1.0161 | 0.9701 | 1.0643 | 0.5291 | -0.0036 | 0.0408 | 0.9334 | 17.6680 | 0.0014 | -784.5493   |
| log_g_Shewanella | IschemicStroke      | Weighted mode             | 6  | 1.0139 | 0.9693 | 1.0606 | 0.5735 | -0.0036 | 0.0408 | 0.9334 | 17.6680 | 0.0014 | -784.5493   |
| log_g_Shewanella | LargeArteryStroke   | MR Egger                  | 6  | 0.8364 | 0.5228 | 1.3380 | 0.4974 | 0.0721  | 0.1081 | 0.5409 | 11.7545 | 0.0193 | -157.9186   |
| log_g_Shewanella | LargeArteryStroke   | Weighted median           | 6  | 0.9212 | 0.8226 | 1.0316 | 0.1553 | 0.0721  | 0.1081 | 0.5409 | 11.7545 | 0.0193 | -157.9186   |
| log_g_Shewanella | LargeArteryStroke   | Inverse variance weighted | 6  | 0.9744 | 0.8539 | 1.1120 | 0.7003 | 0.0721  | 0.1081 | 0.5409 | 11.7545 | 0.0193 | -157.9186   |
| log_g_Shewanella | LargeArteryStroke   | Simple mode               | 6  | 0.9012 | 0.7694 | 1.0554 | 0.2533 | 0.0721  | 0.1081 | 0.5409 | 11.7545 | 0.0193 | -157.9186   |
| log_g_Shewanella | LargeArteryStroke   | Weighted mode             | 6  | 0.8931 | 0.7648 | 1.0430 | 0.2126 | 0.0721  | 0.1081 | 0.5409 | 11.7545 | 0.0193 | -157.9186   |
| log_g_Shewanella | SmallVesselStroke   | MR Egger                  | 6  | 0.9321 | 0.7288 | 1.1921 | 0.6051 | 0.0088  | 0.0566 | 0.8839 | 10.3281 | 0.0352 | -365.5257   |
| log_g_Shewanella | SmallVesselStroke   | Weighted median           | 6  | 0.9716 | 0.9104 | 1.0370 | 0.3861 | 0.0088  | 0.0566 | 0.8839 | 10.3281 | 0.0352 | -365.5257   |
| log_g_Shewanella | SmallVesselStroke   | Inverse variance weighted | 6  | 0.9496 | 0.8892 | 1.0142 | 0.1234 | 0.0088  | 0.0566 | 0.8839 | 10.3281 | 0.0352 | -365.5257   |
| log_g_Shewanella | SmallVesselStroke   | Simple mode               | 6  | 0.9871 | 0.9005 | 1.0821 | 0.7929 | 0.0088  | 0.0566 | 0.8839 | 10.3281 | 0.0352 | -365.5257   |
| log_g_Shewanella | SmallVesselStroke   | Weighted mode             | 6  | 0.9805 | 0.8889 | 1.0816 | 0.7109 | 0.0088  | 0.0566 | 0.8839 | 10.3281 | 0.0352 | -365.5257   |
| log_g_Shewanella | Stroke              | MR Egger                  | 6  | 1.0085 | 0.8639 | 1.1772 | 0.9201 | -0.0080 | 0.0358 | 0.8340 | 18.9041 | 0.0008 | -910.1994   |
| log_g_Shewanella | Stroke              | Weighted median           | 6  | 1.0094 | 0.9803 | 1.0394 | 0.5298 | -0.0080 | 0.0358 | 0.8340 | 18.9041 | 0.0008 | -910.1994   |
| log_g_Shewanella | Stroke              | Inverse variance weighted | 6  | 0.9916 | 0.9509 | 1.0341 | 0.6945 | -0.0080 | 0.0358 | 0.8340 | 18.9041 | 0.0008 | -910.1994   |
| log_g_Shewanella | Stroke              | Simple mode               | 6  | 1.0178 | 0.9815 | 1.0554 | 0.3850 | -0.0080 | 0.0358 | 0.8340 | 18.9041 | 0.0008 | -910.1994   |
| log_g_Shewanella | Stroke              | Weighted mode             | 6  | 1.0125 | 0.9756 | 1.0507 | 0.5417 | -0.0080 | 0.0358 | 0.8340 | 18.9041 | 0.0008 | -910.1994   |
| log_g_Slackia    | CardioEmbolicStroke | MR Egger                  | 15 | 0.6971 | 0.5016 | 0.9687 | 0.0510 | 0.1581  | 0.0775 | 0.0623 | 22.4650 | 0.0696 | -27.6787    |
| log_g_Slackia    | CardioEmbolicStroke | Weighted median           | 15 | 0.9652 | 0.8730 | 1.0671 | 0.4888 | 0.1581  | 0.0775 | 0.0623 | 22.4650 | 0.0696 | -27.6787    |
| log_g_Slackia    | CardioEmbolicStroke | Inverse variance weighted | 15 | 0.9719 | 0.8909 | 1.0603 | 0.5216 | 0.1581  | 0.0775 | 0.0623 | 22.4650 | 0.0696 | -27.6787    |
| log_g_Slackia    | CardioEmbolicStroke | Simple mode               | 15 | 0.9332 | 0.7629 | 1.1415 | 0.5123 | 0.1581  | 0.0775 | 0.0623 | 22.4650 | 0.0696 | -27.6787    |
| log_g_Slackia    | CardioEmbolicStroke | Weighted mode             | 15 | 0.9013 | 0.7496 | 1.0836 | 0.2873 | 0.1581  | 0.0775 | 0.0623 | 22.4650 | 0.0696 | -27.6787    |
| log_g_Slackia    | IschemicStroke      | MR Egger                  | 15 | 0.9597 | 0.8976 | 1.0260 | 0.2489 | 0.0184  | 0.0157 | 0.2620 | 7.3229  | 0.9215 | -362.6366   |
| log_g_Slackia    | IschemicStroke      | Weighted median           | 15 | 0.9957 | 0.9746 | 1.0172 | 0.6908 | 0.0184  | 0.0157 | 0.2620 | 7.3229  | 0.9215 | -362.6366   |
| log_g_Slackia    | IschemicStroke      | Inverse variance weighted | 15 | 0.9977 | 0.9818 | 1.0137 | 0.7739 | 0.0184  | 0.0157 | 0.2620 | 7.3229  | 0.9215 | -362.6366   |
| log_g_Slackia    | IschemicStroke      | Simple mode               | 15 | 0.9978 | 0.9622 | 1.0347 | 0.9059 | 0.0184  | 0.0157 | 0.2620 | 7.3229  | 0.9215 | -362.6366   |
| log_g_Slackia    | IschemicStroke      | Weighted mode             | 15 | 0.9978 | 0.9642 | 1.0325 | 0.9001 | 0.0184  | 0.0157 | 0.2620 | 7.3229  | 0.9215 | -362.6366   |
| log_g_Slackia    | LargeArteryStroke   | MR Egger                  | 15 | 0.8957 | 0.7215 | 1.1118 | 0.3359 | 0.0318  | 0.0508 | 0.5414 | 10.4453 | 0.6572 | -60.4325    |
| log_g_Slackia    | LargeArteryStroke   | Weighted median           | 15 | 0.9361 | 0.8720 | 1.0050 | 0.0683 | 0.0318  | 0.0508 | 0.5414 | 10.4453 | 0.6572 | -60.4325    |
| log_g_Slackia    | LargeArteryStroke   | Inverse variance weighted | 15 | 0.9579 | 0.9096 | 1.0087 | 0.1029 | 0.0318  | 0.0508 | 0.5414 | 10.4453 | 0.6572 | -60.4325    |
| log_g_Slackia    | LargeArteryStroke   | Simple mode               | 15 | 0.9108 | 0.7921 | 1.0472 | 0.2106 | 0.0318  | 0.0508 | 0.5414 | 10.4453 | 0.6572 | -60.4325    |
| log_g_Slackia    | LargeArteryStroke   | Weighted mode             | 15 | 0.9097 | 0.7940 | 1.0424 | 0.1945 | 0.0318  | 0.0508 | 0.5414 | 10.4453 | 0.6572 | -60.4325    |
| log_g_Slackia    | SmallVesselStroke   | MR Egger                  | 15 | 1.0250 | 0.9086 | 1.1563 | 0.6945 | -0.0138 | 0.0283 | 0.6331 | 9.6221  | 0.7245 | -136.7903   |
| log_g_Slackia    | SmallVesselStroke   | Weighted median           | 15 | 1.0023 | 0.9636 | 1.0425 | 0.9094 | -0.0138 | 0.0283 | 0.6331 | 9.6221  | 0.7245 | -136.7903   |
| log_g_Slackia    | SmallVesselStroke   | Inverse variance weighted | 15 | 0.9955 | 0.9673 | 1.0246 | 0.7596 | -0.0138 | 0.0283 | 0.6331 | 9.6221  | 0.7245 | -136.7903   |
| log_g_Slackia    | SmallVesselStroke   | Simple mode               | 15 | 1.0172 | 0.9434 | 1.0967 | 0.6645 | -0.0138 | 0.0283 | 0.6331 | 9.6221  | 0.7245 | -136.7903   |
| log_g_Slackia    | SmallVesselStroke   | Weighted mode             | 15 | 1.0159 | 0.9404 | 1.0975 | 0.6941 | -0.0138 | 0.0283 | 0.6331 | 9.6221  | 0.7245 | -136.7903   |
| log_g_Slackia    | Stroke              | MR Egger                  | 16 | 0.9794 | 0.9254 | 1.0366 | 0.4846 | 0.0098  | 0.0132 | 0.4714 | 9.0051  | 0.8307 | -405.1861   |
| log_g_Slackia    | Stroke              | Weighted median           | 16 | 1.0020 | 0.9844 | 1.0199 | 0.8240 | 0.0098  | 0.0132 | 0.4714 | 9.0051  | 0.8307 | -405.1861   |
| log_g_Slackia    | Stroke              | Inverse variance weighted | 16 | 1.0000 | 0.9865 | 1.0137 | 0.9977 | 0.0098  | 0.0132 | 0.4714 | 9.0051  | 0.8307 | -405.1861   |

|                          |                     |                           |    |        |        |        |        |         |        |        |        |        |              |
|--------------------------|---------------------|---------------------------|----|--------|--------|--------|--------|---------|--------|--------|--------|--------|--------------|
| log_g_Slackia            | Stroke              | Simple mode               | 16 | 1.0101 | 0.9802 | 1.0409 | 0.5217 | 0.0098  | 0.0132 | 0.4714 | 9.0051 | 0.8307 | -405.1861    |
| log_g_Slackia            | Stroke              | Weighted mode             | 16 | 1.0104 | 0.9806 | 1.0411 | 0.5083 | 0.0098  | 0.0132 | 0.4714 | 9.0051 | 0.8307 | -405.1861    |
| log_g_Sodalis            | CardioEmbolicStroke | MR Egger                  | 5  | 0.8554 | 0.3525 | 2.0758 | 0.7527 | 0.0715  | 0.1991 | 0.7433 | 4.0316 | 0.2581 | -195456.1345 |
| log_g_Sodalis            | CardioEmbolicStroke | Weighted median           | 5  | 1.0344 | 0.8862 | 1.2074 | 0.6678 | 0.0715  | 0.1991 | 0.7433 | 4.0316 | 0.2581 | -195456.1345 |
| log_g_Sodalis            | CardioEmbolicStroke | Inverse variance weighted | 5  | 1.0045 | 0.8957 | 1.1265 | 0.9385 | 0.0715  | 0.1991 | 0.7433 | 4.0316 | 0.2581 | -195456.1345 |
| log_g_Sodalis            | CardioEmbolicStroke | Simple mode               | 5  | 1.0853 | 0.8638 | 1.3636 | 0.5210 | 0.0715  | 0.1991 | 0.7433 | 4.0316 | 0.2581 | -195456.1345 |
| log_g_Sodalis            | CardioEmbolicStroke | Weighted mode             | 5  | 1.0853 | 0.8543 | 1.3787 | 0.5393 | 0.0715  | 0.1991 | 0.7433 | 4.0316 | 0.2581 | -195456.1345 |
| log_g_Sodalis            | IschemicStroke      | MR Egger                  | 7  | 1.0414 | 0.9476 | 1.1446 | 0.4380 | -0.0233 | 0.0228 | 0.3547 | 7.4875 | 0.2781 | -313.2999    |
| log_g_Sodalis            | IschemicStroke      | Weighted median           | 7  | 1.0002 | 0.9695 | 1.0319 | 0.9889 | -0.0233 | 0.0228 | 0.3547 | 7.4875 | 0.2781 | -313.2999    |
| log_g_Sodalis            | IschemicStroke      | Inverse variance weighted | 7  | 0.9934 | 0.9677 | 1.0197 | 0.6196 | -0.0233 | 0.0228 | 0.3547 | 7.4875 | 0.2781 | -313.2999    |
| log_g_Sodalis            | IschemicStroke      | Simple mode               | 7  | 1.0179 | 0.9723 | 1.0656 | 0.4769 | -0.0233 | 0.0228 | 0.3547 | 7.4875 | 0.2781 | -313.2999    |
| log_g_Sodalis            | IschemicStroke      | Weighted mode             | 7  | 1.0056 | 0.9667 | 1.0461 | 0.7911 | -0.0233 | 0.0228 | 0.3547 | 7.4875 | 0.2781 | -313.2999    |
| log_g_Sodalis            | LargeArteryStroke   | MR Egger                  | 5  | 1.4495 | 0.6326 | 3.3214 | 0.4448 | -0.1713 | 0.1859 | 0.4247 | 8.0802 | 0.0887 | -187272.5072 |
| log_g_Sodalis            | LargeArteryStroke   | Weighted median           | 5  | 0.9513 | 0.8542 | 1.0594 | 0.3635 | -0.1713 | 0.1859 | 0.4247 | 8.0802 | 0.0887 | -187272.5072 |
| log_g_Sodalis            | LargeArteryStroke   | Inverse variance weighted | 5  | 0.9856 | 0.8749 | 1.1103 | 0.8115 | -0.1713 | 0.1859 | 0.4247 | 8.0802 | 0.0887 | -187272.5072 |
| log_g_Sodalis            | LargeArteryStroke   | Simple mode               | 5  | 0.9477 | 0.8211 | 1.0938 | 0.5033 | -0.1713 | 0.1859 | 0.4247 | 8.0802 | 0.0887 | -187272.5072 |
| log_g_Sodalis            | LargeArteryStroke   | Weighted mode             | 5  | 0.9520 | 0.8310 | 1.0908 | 0.5179 | -0.1713 | 0.1859 | 0.4247 | 8.0802 | 0.0887 | -187272.5072 |
| log_g_Sodalis            | SmallVesselStroke   | MR Egger                  | 6  | 1.0555 | 0.8400 | 1.3261 | 0.6671 | -0.0413 | 0.0528 | 0.4778 | 3.9884 | 0.4076 | -1076.0011   |
| log_g_Sodalis            | SmallVesselStroke   | Weighted median           | 6  | 0.9748 | 0.9165 | 1.0368 | 0.4180 | -0.0413 | 0.0528 | 0.4778 | 3.9884 | 0.4076 | -1076.0011   |
| log_g_Sodalis            | SmallVesselStroke   | Inverse variance weighted | 6  | 0.9652 | 0.9232 | 1.0092 | 0.1196 | -0.0413 | 0.0528 | 0.4778 | 3.9884 | 0.4076 | -1076.0011   |
| log_g_Sodalis            | SmallVesselStroke   | Simple mode               | 6  | 1.0023 | 0.9100 | 1.1038 | 0.9653 | -0.0413 | 0.0528 | 0.4778 | 3.9884 | 0.4076 | -1076.0011   |
| log_g_Sodalis            | SmallVesselStroke   | Weighted mode             | 6  | 0.9969 | 0.9114 | 1.0905 | 0.9493 | -0.0413 | 0.0528 | 0.4778 | 3.9884 | 0.4076 | -1076.0011   |
| log_g_Sodalis            | Stroke              | MR Egger                  | 8  | 1.0432 | 0.9781 | 1.1126 | 0.2456 | -0.0254 | 0.0160 | 0.1622 | 5.6756 | 0.5781 | -306.6675    |
| log_g_Sodalis            | Stroke              | Weighted median           | 8  | 0.9937 | 0.9683 | 1.0196 | 0.6289 | -0.0254 | 0.0160 | 0.1622 | 5.6756 | 0.5781 | -306.6675    |
| log_g_Sodalis            | Stroke              | Inverse variance weighted | 8  | 0.9924 | 0.9734 | 1.0117 | 0.4373 | -0.0254 | 0.0160 | 0.1622 | 5.6756 | 0.5781 | -306.6675    |
| log_g_Sodalis            | Stroke              | Simple mode               | 8  | 1.0108 | 0.9698 | 1.0537 | 0.6263 | -0.0254 | 0.0160 | 0.1622 | 5.6756 | 0.5781 | -306.6675    |
| log_g_Sodalis            | Stroke              | Weighted mode             | 8  | 0.9891 | 0.9529 | 1.0267 | 0.5839 | -0.0254 | 0.0160 | 0.1622 | 5.6756 | 0.5781 | -306.6675    |
| log_g_Thauera            | CardioEmbolicStroke | MR Egger                  | 7  | 0.5663 | 0.2180 | 1.4712 | 0.2957 | 0.1672  | 0.1998 | 0.4408 | 8.2814 | 0.1414 | -583.5192    |
| log_g_Thauera            | CardioEmbolicStroke | Weighted median           | 7  | 0.8113 | 0.6986 | 0.9422 | 0.0061 | 0.1672  | 0.1998 | 0.4408 | 8.2814 | 0.1414 | -583.5192    |
| log_g_Thauera            | CardioEmbolicStroke | Inverse variance weighted | 7  | 0.8478 | 0.7435 | 0.9668 | 0.0138 | 0.1672  | 0.1998 | 0.4408 | 8.2814 | 0.1414 | -583.5192    |
| log_g_Thauera            | CardioEmbolicStroke | Simple mode               | 7  | 0.7958 | 0.6515 | 0.9722 | 0.0667 | 0.1672  | 0.1998 | 0.4408 | 8.2814 | 0.1414 | -583.5192    |
| log_g_Thauera            | CardioEmbolicStroke | Weighted mode             | 7  | 0.7907 | 0.6449 | 0.9694 | 0.0646 | 0.1672  | 0.1998 | 0.4408 | 8.2814 | 0.1414 | -583.5192    |
| log_g_Thauera            | IschemicStroke      | MR Egger                  | 7  | 0.9450 | 0.7933 | 1.1258 | 0.5546 | 0.0195  | 0.0367 | 0.6174 | 5.2776 | 0.3830 | -8969.6941   |
| log_g_Thauera            | IschemicStroke      | Weighted median           | 7  | 0.9909 | 0.9593 | 1.0236 | 0.5826 | 0.0195  | 0.0367 | 0.6174 | 5.2776 | 0.3830 | -8969.6941   |
| log_g_Thauera            | IschemicStroke      | Inverse variance weighted | 7  | 0.9906 | 0.9668 | 1.0149 | 0.4437 | 0.0195  | 0.0367 | 0.6174 | 5.2776 | 0.3830 | -8969.6941   |
| log_g_Thauera            | IschemicStroke      | Simple mode               | 7  | 0.9896 | 0.9429 | 1.0386 | 0.6858 | 0.0195  | 0.0367 | 0.6174 | 5.2776 | 0.3830 | -8969.6941   |
| log_g_Thauera            | IschemicStroke      | Weighted mode             | 7  | 0.9893 | 0.9427 | 1.0382 | 0.6766 | 0.0195  | 0.0367 | 0.6174 | 5.2776 | 0.3830 | -8969.6941   |
| log_g_Thauera            | LargeArteryStroke   | MR Egger                  | 7  | 1.0788 | 0.4962 | 2.3455 | 0.8557 | -0.0227 | 0.1626 | 0.8943 | 9.7493 | 0.0827 | -1552.3299   |
| log_g_Thauera            | LargeArteryStroke   | Weighted median           | 7  | 1.0817 | 0.9719 | 1.2040 | 0.1504 | -0.0227 | 0.1626 | 0.8943 | 9.7493 | 0.0827 | -1552.3299   |
| log_g_Thauera            | LargeArteryStroke   | Inverse variance weighted | 7  | 1.0213 | 0.9240 | 1.1288 | 0.6805 | -0.0227 | 0.1626 | 0.8943 | 9.7493 | 0.0827 | -1552.3299   |
| log_g_Thauera            | LargeArteryStroke   | Simple mode               | 7  | 1.0940 | 0.9647 | 1.2407 | 0.2110 | -0.0227 | 0.1626 | 0.8943 | 9.7493 | 0.0827 | -1552.3299   |
| log_g_Thauera            | LargeArteryStroke   | Weighted mode             | 7  | 1.0951 | 0.9644 | 1.2434 | 0.2107 | -0.0227 | 0.1626 | 0.8943 | 9.7493 | 0.0827 | -1552.3299   |
| log_g_Thauera            | SmallVesselStroke   | MR Egger                  | 7  | 0.9469 | 0.6967 | 1.2870 | 0.7417 | 0.0258  | 0.0643 | 0.7047 | 1.5825 | 0.9034 | -7916.1145   |
| log_g_Thauera            | SmallVesselStroke   | Weighted median           | 7  | 0.9970 | 0.9443 | 1.0528 | 0.9150 | 0.0258  | 0.0643 | 0.7047 | 1.5825 | 0.9034 | -7916.1145   |
| log_g_Thauera            | SmallVesselStroke   | Inverse variance weighted | 7  | 1.0077 | 0.9646 | 1.0527 | 0.7312 | 0.0258  | 0.0643 | 0.7047 | 1.5825 | 0.9034 | -7916.1145   |
| log_g_Thauera            | SmallVesselStroke   | Simple mode               | 7  | 0.9859 | 0.9102 | 1.0680 | 0.7403 | 0.0258  | 0.0643 | 0.7047 | 1.5825 | 0.9034 | -7916.1145   |
| log_g_Thauera            | SmallVesselStroke   | Weighted mode             | 7  | 0.9894 | 0.9190 | 1.0651 | 0.7863 | 0.0258  | 0.0643 | 0.7047 | 1.5825 | 0.9034 | -7916.1145   |
| log_g_Thauera            | Stroke              | MR Egger                  | 7  | 0.9085 | 0.7790 | 1.0597 | 0.2763 | 0.0373  | 0.0323 | 0.3009 | 7.4313 | 0.2828 | -9302.2706   |
| log_g_Thauera            | Stroke              | Weighted median           | 7  | 0.9894 | 0.9601 | 1.0196 | 0.4865 | 0.0373  | 0.0323 | 0.3009 | 7.4313 | 0.2828 | -9302.2706   |
| log_g_Thauera            | Stroke              | Inverse variance weighted | 7  | 0.9937 | 0.9711 | 1.0168 | 0.5904 | 0.0373  | 0.0323 | 0.3009 | 7.4313 | 0.2828 | -9302.2706   |
| log_g_Thauera            | Stroke              | Simple mode               | 7  | 0.9825 | 0.9414 | 1.0254 | 0.4486 | 0.0373  | 0.0323 | 0.3009 | 7.4313 | 0.2828 | -9302.2706   |
| log_g_Thauera            | Stroke              | Weighted mode             | 7  | 0.9825 | 0.9418 | 1.0249 | 0.4441 | 0.0373  | 0.0323 | 0.3009 | 7.4313 | 0.2828 | -9302.2706   |
| log_g_Thermoanaerobacter | CardioEmbolicStroke | MR Egger                  | 8  | 0.8867 | 0.5718 | 1.3751 | 0.6106 | 0.0886  | 0.0896 | 0.3609 | 5.7301 | 0.4541 | -248.1924    |

|                             |                     |                           |    |        |        |        |        |         |        |        |         |        |             |
|-----------------------------|---------------------|---------------------------|----|--------|--------|--------|--------|---------|--------|--------|---------|--------|-------------|
| log_g_Thermoanaerobacter    | CardioEmbolicStroke | Weighted median           | 8  | 1.0435 | 0.9143 | 1.1911 | 0.5277 | 0.0886  | 0.0896 | 0.3609 | 5.7301  | 0.4541 | -248.1924   |
| log_g_Thermoanaerobacter    | CardioEmbolicStroke | Inverse variance weighted | 8  | 1.1003 | 0.9973 | 1.2139 | 0.0568 | 0.0886  | 0.0896 | 0.3609 | 5.7301  | 0.4541 | -248.1924   |
| log_g_Thermoanaerobacter    | CardioEmbolicStroke | Simple mode               | 8  | 1.0218 | 0.8398 | 1.2431 | 0.8357 | 0.0886  | 0.0896 | 0.3609 | 5.7301  | 0.4541 | -248.1924   |
| log_g_Thermoanaerobacter    | CardioEmbolicStroke | Weighted mode             | 8  | 1.0187 | 0.8489 | 1.2224 | 0.8479 | 0.0886  | 0.0896 | 0.3609 | 5.7301  | 0.4541 | -248.1924   |
| log_g_Thermoanaerobacter    | IschemicStroke      | MR Egger                  | 13 | 1.0529 | 0.9933 | 1.1161 | 0.1108 | -0.0146 | 0.0135 | 0.3017 | 13.4308 | 0.3385 | -82.8967    |
| log_g_Thermoanaerobacter    | IschemicStroke      | Weighted median           | 13 | 1.0181 | 0.9920 | 1.0450 | 0.1750 | -0.0146 | 0.0135 | 0.3017 | 13.4308 | 0.3385 | -82.8967    |
| log_g_Thermoanaerobacter    | IschemicStroke      | Inverse variance weighted | 13 | 1.0216 | 1.0009 | 1.0427 | 0.0410 | -0.0146 | 0.0135 | 0.3017 | 13.4308 | 0.3385 | -82.8967    |
| log_g_Thermoanaerobacter    | IschemicStroke      | Simple mode               | 13 | 1.0366 | 0.9885 | 1.0871 | 0.1637 | -0.0146 | 0.0135 | 0.3017 | 13.4308 | 0.3385 | -82.8967    |
| log_g_Thermoanaerobacter    | IschemicStroke      | Weighted mode             | 13 | 1.0053 | 0.9611 | 1.0515 | 0.8228 | -0.0146 | 0.0135 | 0.3017 | 13.4308 | 0.3385 | -82.8967    |
| log_g_Thermoanaerobacter    | LargeArteryStroke   | MR Egger                  | 12 | 1.1235 | 0.9216 | 1.3697 | 0.2760 | -0.0373 | 0.0453 | 0.4296 | 11.5129 | 0.3190 | -16.0897    |
| log_g_Thermoanaerobacter    | LargeArteryStroke   | Weighted median           | 12 | 1.0321 | 0.9436 | 1.1289 | 0.4897 | -0.0373 | 0.0453 | 0.4296 | 11.5129 | 0.3190 | -16.0897    |
| log_g_Thermoanaerobacter    | LargeArteryStroke   | Inverse variance weighted | 12 | 1.0391 | 0.9716 | 1.1113 | 0.2631 | -0.0373 | 0.0453 | 0.4296 | 11.5129 | 0.3190 | -16.0897    |
| log_g_Thermoanaerobacter    | LargeArteryStroke   | Simple mode               | 12 | 1.0429 | 0.9030 | 1.2045 | 0.5794 | -0.0373 | 0.0453 | 0.4296 | 11.5129 | 0.3190 | -16.0897    |
| log_g_Thermoanaerobacter    | LargeArteryStroke   | Weighted mode             | 12 | 1.0298 | 0.8933 | 1.1871 | 0.6936 | -0.0373 | 0.0453 | 0.4296 | 11.5129 | 0.3190 | -16.0897    |
| log_g_Thermoanaerobacter    | SmallVesselStroke   | MR Egger                  | 12 | 1.0830 | 0.9558 | 1.2273 | 0.2396 | -0.0364 | 0.0285 | 0.2301 | 16.6642 | 0.1182 | -36.4575    |
| log_g_Thermoanaerobacter    | SmallVesselStroke   | Weighted median           | 12 | 0.9790 | 0.9302 | 1.0305 | 0.4177 | -0.0364 | 0.0285 | 0.2301 | 16.6642 | 0.1182 | -36.4575    |
| log_g_Thermoanaerobacter    | SmallVesselStroke   | Inverse variance weighted | 12 | 1.0031 | 0.9602 | 1.0480 | 0.8891 | -0.0364 | 0.0285 | 0.2301 | 16.6642 | 0.1182 | -36.4575    |
| log_g_Thermoanaerobacter    | SmallVesselStroke   | Simple mode               | 12 | 0.9559 | 0.8796 | 1.0389 | 0.3109 | -0.0364 | 0.0285 | 0.2301 | 16.6642 | 0.1182 | -36.4575    |
| log_g_Thermoanaerobacter    | SmallVesselStroke   | Weighted mode             | 12 | 0.9585 | 0.8884 | 1.0341 | 0.2974 | -0.0364 | 0.0285 | 0.2301 | 16.6642 | 0.1182 | -36.4575    |
| log_g_Thermoanaerobacter    | Stroke              | MR Egger                  | 13 | 1.0346 | 0.9667 | 1.1074 | 0.3472 | -0.0073 | 0.0160 | 0.6577 | 25.2681 | 0.0083 | -67.2234    |
| log_g_Thermoanaerobacter    | Stroke              | Weighted median           | 13 | 1.0115 | 0.9859 | 1.0377 | 0.3818 | -0.0073 | 0.0160 | 0.6577 | 25.2681 | 0.0083 | -67.2234    |
| log_g_Thermoanaerobacter    | Stroke              | Inverse variance weighted | 13 | 1.0195 | 0.9956 | 1.0440 | 0.1102 | -0.0073 | 0.0160 | 0.6577 | 25.2681 | 0.0083 | -67.2234    |
| log_g_Thermoanaerobacter    | Stroke              | Simple mode               | 13 | 1.0476 | 0.9887 | 1.1099 | 0.1409 | -0.0073 | 0.0160 | 0.6577 | 25.2681 | 0.0083 | -67.2234    |
| log_g_Thermoanaerobacter    | Stroke              | Weighted mode             | 13 | 0.9838 | 0.9339 | 1.0363 | 0.5500 | -0.0073 | 0.0160 | 0.6577 | 25.2681 | 0.0083 | -67.2234    |
| log_g_Thermoanaerobacterium | CardioEmbolicStroke | MR Egger                  | 11 | 0.8728 | 0.4758 | 1.6008 | 0.6705 | 0.0531  | 0.1302 | 0.6929 | 17.7439 | 0.0383 | -82.3062    |
| log_g_Thermoanaerobacterium | CardioEmbolicStroke | Weighted median           | 11 | 1.0113 | 0.8988 | 1.1380 | 0.8516 | 0.0531  | 0.1302 | 0.6929 | 17.7439 | 0.0383 | -82.3062    |
| log_g_Thermoanaerobacterium | CardioEmbolicStroke | Inverse variance weighted | 11 | 0.9879 | 0.8837 | 1.1043 | 0.8301 | 0.0531  | 0.1302 | 0.6929 | 17.7439 | 0.0383 | -82.3062    |
| log_g_Thermoanaerobacterium | CardioEmbolicStroke | Simple mode               | 11 | 1.0001 | 0.8432 | 1.1861 | 0.9992 | 0.0531  | 0.1302 | 0.6929 | 17.7439 | 0.0383 | -82.3062    |
| log_g_Thermoanaerobacterium | CardioEmbolicStroke | Weighted mode             | 11 | 0.9817 | 0.8205 | 1.1745 | 0.8441 | 0.0531  | 0.1302 | 0.6929 | 17.7439 | 0.0383 | -82.3062    |
| log_g_Thermoanaerobacterium | IschemicStroke      | MR Egger                  | 13 | 0.9054 | 0.8552 | 0.9585 | 0.0058 | 0.0401  | 0.0132 | 0.0112 | 18.2605 | 0.1080 | -61.9290    |
| log_g_Thermoanaerobacterium | IschemicStroke      | Weighted median           | 13 | 0.9886 | 0.9636 | 1.0142 | 0.3792 | 0.0401  | 0.0132 | 0.0112 | 18.2605 | 0.1080 | -61.9290    |
| log_g_Thermoanaerobacterium | IschemicStroke      | Inverse variance weighted | 13 | 0.9850 | 0.9638 | 1.0066 | 0.1720 | 0.0401  | 0.0132 | 0.0112 | 18.2605 | 0.1080 | -61.9290    |
| log_g_Thermoanaerobacterium | IschemicStroke      | Simple mode               | 13 | 0.9986 | 0.9464 | 1.0537 | 0.9603 | 0.0401  | 0.0132 | 0.0112 | 18.2605 | 0.1080 | -61.9290    |
| log_g_Thermoanaerobacterium | IschemicStroke      | Weighted mode             | 13 | 0.9971 | 0.9529 | 1.0433 | 0.9021 | 0.0401  | 0.0132 | 0.0112 | 18.2605 | 0.1080 | -61.9290    |
| log_g_Thermoanaerobacterium | LargeArteryStroke   | MR Egger                  | 12 | 0.9411 | 0.7421 | 1.1935 | 0.6274 | 0.0382  | 0.0531 | 0.4888 | 10.8477 | 0.3695 | -64.5996    |
| log_g_Thermoanaerobacterium | LargeArteryStroke   | Weighted median           | 12 | 1.0172 | 0.9369 | 1.1044 | 0.6840 | 0.0382  | 0.0531 | 0.4888 | 10.8477 | 0.3695 | -64.5996    |
| log_g_Thermoanaerobacterium | LargeArteryStroke   | Inverse variance weighted | 12 | 1.0237 | 0.9639 | 1.0872 | 0.4454 | 0.0382  | 0.0531 | 0.4888 | 10.8477 | 0.3695 | -64.5996    |
| log_g_Thermoanaerobacterium | LargeArteryStroke   | Simple mode               | 12 | 1.1238 | 0.9548 | 1.3227 | 0.1881 | 0.0382  | 0.0531 | 0.4888 | 10.8477 | 0.3695 | -64.5996    |
| log_g_Thermoanaerobacterium | LargeArteryStroke   | Weighted mode             | 12 | 0.9362 | 0.7885 | 1.1115 | 0.4672 | 0.0382  | 0.0531 | 0.4888 | 10.8477 | 0.3695 | -64.5996    |
| log_g_Thermoanaerobacterium | SmallVesselStroke   | MR Egger                  | 12 | 0.9081 | 0.7715 | 1.0688 | 0.2731 | 0.0242  | 0.0364 | 0.5216 | 16.5218 | 0.0856 | -102.1868   |
| log_g_Thermoanaerobacterium | SmallVesselStroke   | Weighted median           | 12 | 0.9597 | 0.9150 | 1.0066 | 0.0907 | 0.0242  | 0.0364 | 0.5216 | 16.5218 | 0.0856 | -102.1868   |
| log_g_Thermoanaerobacterium | SmallVesselStroke   | Inverse variance weighted | 12 | 0.9578 | 0.9191 | 0.9982 | 0.0406 | 0.0242  | 0.0364 | 0.5216 | 16.5218 | 0.0856 | -102.1868   |
| log_g_Thermoanaerobacterium | SmallVesselStroke   | Simple mode               | 12 | 0.9351 | 0.8541 | 1.0237 | 0.1743 | 0.0242  | 0.0364 | 0.5216 | 16.5218 | 0.0856 | -102.1868   |
| log_g_Thermoanaerobacterium | SmallVesselStroke   | Weighted mode             | 12 | 0.9393 | 0.8619 | 1.0236 | 0.1812 | 0.0242  | 0.0364 | 0.5216 | 16.5218 | 0.0856 | -102.1868   |
| log_g_Thermoanaerobacterium | Stroke              | MR Egger                  | 13 | 0.9148 | 0.8634 | 0.9692 | 0.0116 | 0.0351  | 0.0132 | 0.0225 | 24.3455 | 0.0182 | -55.5125    |
| log_g_Thermoanaerobacterium | Stroke              | Weighted median           | 13 | 0.9948 | 0.9730 | 1.0170 | 0.6420 | 0.0351  | 0.0132 | 0.0225 | 24.3455 | 0.0182 | -55.5125    |
| log_g_Thermoanaerobacterium | Stroke              | Inverse variance weighted | 13 | 0.9856 | 0.9648 | 1.0069 | 0.1832 | 0.0351  | 0.0132 | 0.0225 | 24.3455 | 0.0182 | -55.5125    |
| log_g_Thermoanaerobacterium | Stroke              | Simple mode               | 13 | 0.9953 | 0.9643 | 1.0273 | 0.7755 | 0.0351  | 0.0132 | 0.0225 | 24.3455 | 0.0182 | -55.5125    |
| log_g_Thermoanaerobacterium | Stroke              | Weighted mode             | 13 | 0.9953 | 0.9632 | 1.0285 | 0.7831 | 0.0351  | 0.0132 | 0.0225 | 24.3455 | 0.0182 | -55.5125    |
| log_g_Thermosinus           | CardioEmbolicStroke | MR Egger                  | 7  | 0.8654 | 0.3636 | 2.0598 | 0.7571 | 0.0426  | 0.1700 | 0.8123 | 6.6289  | 0.2497 | -39674.2829 |
| log_g_Thermosinus           | CardioEmbolicStroke | Weighted median           | 7  | 1.0044 | 0.8687 | 1.1613 | 0.9529 | 0.0426  | 0.1700 | 0.8123 | 6.6289  | 0.2497 | -39674.2829 |
| log_g_Thermosinus           | CardioEmbolicStroke | Inverse variance weighted | 7  | 0.9658 | 0.8663 | 1.0767 | 0.5299 | 0.0426  | 0.1700 | 0.8123 | 6.6289  | 0.2497 | -39674.2829 |
| log_g_Thermosinus           | CardioEmbolicStroke | Simple mode               | 7  | 1.0535 | 0.8320 | 1.3340 | 0.6805 | 0.0426  | 0.1700 | 0.8123 | 6.6289  | 0.2497 | -39674.2829 |

|                     |                     |                           |    |        |        |        |        |         |        |        |         |        |              |
|---------------------|---------------------|---------------------------|----|--------|--------|--------|--------|---------|--------|--------|---------|--------|--------------|
| log_g_Thermosinus   | CardioEmbolicStroke | Weighted mode             | 7  | 1.0568 | 0.8446 | 1.3224 | 0.6460 | 0.0426  | 0.1700 | 0.8123 | 6.6289  | 0.2497 | -39674.2829  |
| log_g_Thermosinus   | IschemicStroke      | MR Egger                  | 8  | 0.8982 | 0.7112 | 1.1342 | 0.4018 | 0.0405  | 0.0457 | 0.4096 | 12.2796 | 0.0917 | -14935.7531  |
| log_g_Thermosinus   | IschemicStroke      | Weighted median           | 8  | 1.0037 | 0.9708 | 1.0377 | 0.8295 | 0.0405  | 0.0457 | 0.4096 | 12.2796 | 0.0917 | -14935.7531  |
| log_g_Thermosinus   | IschemicStroke      | Inverse variance weighted | 8  | 0.9972 | 0.9674 | 1.0279 | 0.8552 | 0.0405  | 0.0457 | 0.4096 | 12.2796 | 0.0917 | -14935.7531  |
| log_g_Thermosinus   | IschemicStroke      | Simple mode               | 8  | 0.9998 | 0.9531 | 1.0488 | 0.9939 | 0.0405  | 0.0457 | 0.4096 | 12.2796 | 0.0917 | -14935.7531  |
| log_g_Thermosinus   | IschemicStroke      | Weighted mode             | 8  | 1.0002 | 0.9549 | 1.0476 | 0.9937 | 0.0405  | 0.0457 | 0.4096 | 12.2796 | 0.0917 | -14935.7531  |
| log_g_Thermosinus   | LargeArteryStroke   | MR Egger                  | 7  | 1.0936 | 0.6235 | 1.9180 | 0.7676 | -0.0290 | 0.1101 | 0.8028 | 2.8147  | 0.7285 | -100899.7552 |
| log_g_Thermosinus   | LargeArteryStroke   | Weighted median           | 7  | 1.0273 | 0.9315 | 1.1329 | 0.5898 | -0.0290 | 0.1101 | 0.8028 | 2.8147  | 0.7285 | -100899.7552 |
| log_g_Thermosinus   | LargeArteryStroke   | Inverse variance weighted | 7  | 1.0148 | 0.9399 | 1.0957 | 0.7077 | -0.0290 | 0.1101 | 0.8028 | 2.8147  | 0.7285 | -100899.7552 |
| log_g_Thermosinus   | LargeArteryStroke   | Simple mode               | 7  | 1.0740 | 0.9249 | 1.2473 | 0.3853 | -0.0290 | 0.1101 | 0.8028 | 2.8147  | 0.7285 | -100899.7552 |
| log_g_Thermosinus   | LargeArteryStroke   | Weighted mode             | 7  | 1.0731 | 0.9235 | 1.2470 | 0.3926 | -0.0290 | 0.1101 | 0.8028 | 2.8147  | 0.7285 | -100899.7552 |
| log_g_Thermosinus   | SmallVesselStroke   | MR Egger                  | 7  | 0.8153 | 0.5301 | 1.2539 | 0.3951 | 0.0726  | 0.0844 | 0.4290 | 9.4728  | 0.0916 | -95351.9065  |
| log_g_Thermosinus   | SmallVesselStroke   | Weighted median           | 7  | 1.0055 | 0.9440 | 1.0709 | 0.8650 | 0.0726  | 0.0844 | 0.4290 | 9.4728  | 0.0916 | -95351.9065  |
| log_g_Thermosinus   | SmallVesselStroke   | Inverse variance weighted | 7  | 0.9831 | 0.9282 | 1.0412 | 0.5607 | 0.0726  | 0.0844 | 0.4290 | 9.4728  | 0.0916 | -95351.9065  |
| log_g_Thermosinus   | SmallVesselStroke   | Simple mode               | 7  | 0.9999 | 0.9006 | 1.1103 | 0.9992 | 0.0726  | 0.0844 | 0.4290 | 9.4728  | 0.0916 | -95351.9065  |
| log_g_Thermosinus   | SmallVesselStroke   | Weighted mode             | 7  | 1.0108 | 0.9109 | 1.1217 | 0.8465 | 0.0726  | 0.0844 | 0.4290 | 9.4728  | 0.0916 | -95351.9065  |
| log_g_Thermosinus   | Stroke              | MR Egger                  | 8  | 1.0778 | 0.8827 | 1.3160 | 0.4900 | -0.0306 | 0.0390 | 0.4621 | 10.3353 | 0.1112 | -17134.9813  |
| log_g_Thermosinus   | Stroke              | Weighted median           | 8  | 0.9807 | 0.9530 | 1.0092 | 0.1819 | -0.0306 | 0.0390 | 0.4621 | 10.3353 | 0.1112 | -17134.9813  |
| log_g_Thermosinus   | Stroke              | Inverse variance weighted | 8  | 0.9956 | 0.9708 | 1.0209 | 0.7286 | -0.0306 | 0.0390 | 0.4621 | 10.3353 | 0.1112 | -17134.9813  |
| log_g_Thermosinus   | Stroke              | Simple mode               | 8  | 0.9754 | 0.9342 | 1.0185 | 0.2962 | -0.0306 | 0.0390 | 0.4621 | 10.3353 | 0.1112 | -17134.9813  |
| log_g_Thermosinus   | Stroke              | Weighted mode             | 8  | 0.9734 | 0.9336 | 1.0148 | 0.2452 | -0.0306 | 0.0390 | 0.4621 | 10.3353 | 0.1112 | -17134.9813  |
| log_g_Yersinia      | CardioEmbolicStroke | MR Egger                  | 6  | 1.2564 | 0.8365 | 1.8871 | 0.3331 | -0.0750 | 0.0975 | 0.4845 | 1.5861  | 0.8113 | -229.4028    |
| log_g_Yersinia      | CardioEmbolicStroke | Weighted median           | 6  | 1.0583 | 0.9250 | 1.2110 | 0.4093 | -0.0750 | 0.0975 | 0.4845 | 1.5861  | 0.8113 | -229.4028    |
| log_g_Yersinia      | CardioEmbolicStroke | Inverse variance weighted | 6  | 1.0775 | 0.9642 | 1.2042 | 0.1880 | -0.0750 | 0.0975 | 0.4845 | 1.5861  | 0.8113 | -229.4028    |
| log_g_Yersinia      | CardioEmbolicStroke | Simple mode               | 6  | 1.0330 | 0.8534 | 1.2504 | 0.7527 | -0.0750 | 0.0975 | 0.4845 | 1.5861  | 0.8113 | -229.4028    |
| log_g_Yersinia      | CardioEmbolicStroke | Weighted mode             | 6  | 1.0355 | 0.8524 | 1.2580 | 0.7395 | -0.0750 | 0.0975 | 0.4845 | 1.5861  | 0.8113 | -229.4028    |
| log_g_Yersinia      | IschemicStroke      | MR Egger                  | 7  | 0.9705 | 0.8912 | 1.0567 | 0.5208 | 0.0076  | 0.0208 | 0.7302 | 3.0520  | 0.6920 | -567.2366    |
| log_g_Yersinia      | IschemicStroke      | Weighted median           | 7  | 0.9875 | 0.9567 | 1.0193 | 0.4371 | 0.0076  | 0.0208 | 0.7302 | 3.0520  | 0.6920 | -567.2366    |
| log_g_Yersinia      | IschemicStroke      | Inverse variance weighted | 7  | 0.9853 | 0.9612 | 1.0100 | 0.2407 | 0.0076  | 0.0208 | 0.7302 | 3.0520  | 0.6920 | -567.2366    |
| log_g_Yersinia      | IschemicStroke      | Simple mode               | 7  | 0.9653 | 0.9182 | 1.0147 | 0.2150 | 0.0076  | 0.0208 | 0.7302 | 3.0520  | 0.6920 | -567.2366    |
| log_g_Yersinia      | IschemicStroke      | Weighted mode             | 7  | 1.0068 | 0.9561 | 1.0603 | 0.8052 | 0.0076  | 0.0208 | 0.7302 | 3.0520  | 0.6920 | -567.2366    |
| log_g_Yersinia      | LargeArteryStroke   | MR Egger                  | 6  | 1.1517 | 0.7331 | 1.8094 | 0.5731 | -0.0642 | 0.1082 | 0.5848 | 8.7767  | 0.0669 | -231.5505    |
| log_g_Yersinia      | LargeArteryStroke   | Weighted median           | 6  | 1.0298 | 0.9208 | 1.1517 | 0.6071 | -0.0642 | 0.1082 | 0.5848 | 8.7767  | 0.0669 | -231.5505    |
| log_g_Yersinia      | LargeArteryStroke   | Inverse variance weighted | 6  | 1.0097 | 0.9004 | 1.1322 | 0.8693 | -0.0642 | 0.1082 | 0.5848 | 8.7767  | 0.0669 | -231.5505    |
| log_g_Yersinia      | LargeArteryStroke   | Simple mode               | 6  | 1.0955 | 0.8878 | 1.3517 | 0.4340 | -0.0642 | 0.1082 | 0.5848 | 8.7767  | 0.0669 | -231.5505    |
| log_g_Yersinia      | LargeArteryStroke   | Weighted mode             | 6  | 1.0993 | 0.8978 | 1.3460 | 0.4014 | -0.0642 | 0.1082 | 0.5848 | 8.7767  | 0.0669 | -231.5505    |
| log_g_Yersinia      | SmallVesselStroke   | MR Egger                  | 6  | 1.0102 | 0.7949 | 1.2838 | 0.9379 | -0.0005 | 0.0574 | 0.9939 | 8.0116  | 0.0912 | -510.3629    |
| log_g_Yersinia      | SmallVesselStroke   | Weighted median           | 6  | 1.0354 | 0.9764 | 1.0980 | 0.2447 | -0.0005 | 0.0574 | 0.9939 | 8.0116  | 0.0912 | -510.3629    |
| log_g_Yersinia      | SmallVesselStroke   | Inverse variance weighted | 6  | 1.0092 | 0.9520 | 1.0699 | 0.7578 | -0.0005 | 0.0574 | 0.9939 | 8.0116  | 0.0912 | -510.3629    |
| log_g_Yersinia      | SmallVesselStroke   | Simple mode               | 6  | 1.0441 | 0.9694 | 1.1245 | 0.3063 | -0.0005 | 0.0574 | 0.9939 | 8.0116  | 0.0912 | -510.3629    |
| log_g_Yersinia      | SmallVesselStroke   | Weighted mode             | 6  | 1.0434 | 0.9664 | 1.1266 | 0.3271 | -0.0005 | 0.0574 | 0.9939 | 8.0116  | 0.0912 | -510.3629    |
| log_g_Yersinia      | Stroke              | MR Egger                  | 7  | 0.9583 | 0.8924 | 1.0290 | 0.2934 | 0.0167  | 0.0175 | 0.3844 | 2.1824  | 0.9022 | -825.1782    |
| log_g_Yersinia      | Stroke              | Weighted median           | 7  | 0.9891 | 0.9639 | 1.0150 | 0.4060 | 0.0167  | 0.0175 | 0.3844 | 2.1824  | 0.9022 | -825.1782    |
| log_g_Yersinia      | Stroke              | Inverse variance weighted | 7  | 0.9905 | 0.9699 | 1.0115 | 0.3726 | 0.0167  | 0.0175 | 0.3844 | 2.1824  | 0.9022 | -825.1782    |
| log_g_Yersinia      | Stroke              | Simple mode               | 7  | 0.9897 | 0.9525 | 1.0283 | 0.6151 | 0.0167  | 0.0175 | 0.3844 | 2.1824  | 0.9022 | -825.1782    |
| log_g_Yersinia      | Stroke              | Weighted mode             | 7  | 0.9899 | 0.9555 | 1.0255 | 0.5935 | 0.0167  | 0.0175 | 0.3844 | 2.1824  | 0.9022 | -825.1782    |
| log_o_Aeromonadales | CardioEmbolicStroke | MR Egger                  | 10 | 1.2102 | 0.8384 | 1.7470 | 0.3381 | -0.0828 | 0.0800 | 0.3312 | 7.8531  | 0.5490 | -107.7798    |
| log_o_Aeromonadales | CardioEmbolicStroke | Weighted median           | 10 | 0.9828 | 0.8682 | 1.1124 | 0.7832 | -0.0828 | 0.0800 | 0.3312 | 7.8531  | 0.5490 | -107.7798    |
| log_o_Aeromonadales | CardioEmbolicStroke | Inverse variance weighted | 10 | 1.0026 | 0.9189 | 1.0940 | 0.9527 | -0.0828 | 0.0800 | 0.3312 | 7.8531  | 0.5490 | -107.7798    |
| log_o_Aeromonadales | CardioEmbolicStroke | Simple mode               | 10 | 0.9503 | 0.7697 | 1.1733 | 0.6469 | -0.0828 | 0.0800 | 0.3312 | 7.8531  | 0.5490 | -107.7798    |
| log_o_Aeromonadales | CardioEmbolicStroke | Weighted mode             | 10 | 0.9265 | 0.7582 | 1.1321 | 0.4744 | -0.0828 | 0.0800 | 0.3312 | 7.8531  | 0.5490 | -107.7798    |
| log_o_Aeromonadales | IschemicStroke      | MR Egger                  | 13 | 1.0002 | 0.9220 | 1.0850 | 0.9970 | -0.0037 | 0.0189 | 0.8491 | 18.6890 | 0.0669 | -157.0547    |
| log_o_Aeromonadales | IschemicStroke      | Weighted median           | 13 | 0.9821 | 0.9571 | 1.0079 | 0.1725 | -0.0037 | 0.0189 | 0.8491 | 18.6890 | 0.0669 | -157.0547    |

|                       |                     |                           |    |        |        |        |        |         |        |        |         |        |             |
|-----------------------|---------------------|---------------------------|----|--------|--------|--------|--------|---------|--------|--------|---------|--------|-------------|
| log_o_Aeromonadales   | IschemicStroke      | Inverse variance weighted | 13 | 0.9925 | 0.9700 | 1.0155 | 0.5173 | -0.0037 | 0.0189 | 0.8491 | 18.6890 | 0.0669 | -157.0547   |
| log_o_Aeromonadales   | IschemicStroke      | Simple mode               | 13 | 1.0295 | 0.9710 | 1.0916 | 0.3488 | -0.0037 | 0.0189 | 0.8491 | 18.6890 | 0.0669 | -157.0547   |
| log_o_Aeromonadales   | IschemicStroke      | Weighted mode             | 13 | 0.9650 | 0.9207 | 1.0115 | 0.1641 | -0.0037 | 0.0189 | 0.8491 | 18.6890 | 0.0669 | -157.0547   |
| log_o_Aeromonadales   | LargeArteryStroke   | MR Egger                  | 13 | 0.9916 | 0.7443 | 1.3210 | 0.9550 | -0.0030 | 0.0664 | 0.9647 | 21.8016 | 0.0260 | -28.7014    |
| log_o_Aeromonadales   | LargeArteryStroke   | Weighted median           | 13 | 0.9840 | 0.8985 | 1.0777 | 0.7286 | -0.0030 | 0.0664 | 0.9647 | 21.8016 | 0.0260 | -28.7014    |
| log_o_Aeromonadales   | LargeArteryStroke   | Inverse variance weighted | 13 | 0.9853 | 0.9092 | 1.0679 | 0.7187 | -0.0030 | 0.0664 | 0.9647 | 21.8016 | 0.0260 | -28.7014    |
| log_o_Aeromonadales   | LargeArteryStroke   | Simple mode               | 13 | 0.9740 | 0.8232 | 1.1525 | 0.7642 | -0.0030 | 0.0664 | 0.9647 | 21.8016 | 0.0260 | -28.7014    |
| log_o_Aeromonadales   | LargeArteryStroke   | Weighted mode             | 13 | 0.9841 | 0.8649 | 1.1196 | 0.8112 | -0.0030 | 0.0664 | 0.9647 | 21.8016 | 0.0260 | -28.7014    |
| log_o_Aeromonadales   | SmallVesselStroke   | MR Egger                  | 13 | 1.0120 | 0.8725 | 1.1739 | 0.8772 | -0.0011 | 0.0344 | 0.9751 | 19.0735 | 0.0598 | -49.3735    |
| log_o_Aeromonadales   | SmallVesselStroke   | Weighted median           | 13 | 0.9829 | 0.9362 | 1.0319 | 0.4879 | -0.0011 | 0.0344 | 0.9751 | 19.0735 | 0.0598 | -49.3735    |
| log_o_Aeromonadales   | SmallVesselStroke   | Inverse variance weighted | 13 | 1.0097 | 0.9685 | 1.0527 | 0.6498 | -0.0011 | 0.0344 | 0.9751 | 19.0735 | 0.0598 | -49.3735    |
| log_o_Aeromonadales   | SmallVesselStroke   | Simple mode               | 13 | 0.9906 | 0.9120 | 1.0760 | 0.8270 | -0.0011 | 0.0344 | 0.9751 | 19.0735 | 0.0598 | -49.3735    |
| log_o_Aeromonadales   | SmallVesselStroke   | Weighted mode             | 13 | 0.9835 | 0.9151 | 1.0570 | 0.6589 | -0.0011 | 0.0344 | 0.9751 | 19.0735 | 0.0598 | -49.3735    |
| log_o_Aeromonadales   | Stroke              | MR Egger                  | 13 | 1.0060 | 0.9514 | 1.0638 | 0.8368 | -0.0054 | 0.0130 | 0.6857 | 12.1735 | 0.3507 | -250.7308   |
| log_o_Aeromonadales   | Stroke              | Weighted median           | 13 | 0.9907 | 0.9689 | 1.0130 | 0.4100 | -0.0054 | 0.0130 | 0.6857 | 12.1735 | 0.3507 | -250.7308   |
| log_o_Aeromonadales   | Stroke              | Inverse variance weighted | 13 | 0.9947 | 0.9790 | 1.0107 | 0.5138 | -0.0054 | 0.0130 | 0.6857 | 12.1735 | 0.3507 | -250.7308   |
| log_o_Aeromonadales   | Stroke              | Simple mode               | 13 | 0.9845 | 0.9482 | 1.0221 | 0.4297 | -0.0054 | 0.0130 | 0.6857 | 12.1735 | 0.3507 | -250.7308   |
| log_o_Aeromonadales   | Stroke              | Weighted mode             | 13 | 0.9823 | 0.9454 | 1.0206 | 0.3775 | -0.0054 | 0.0130 | 0.6857 | 12.1735 | 0.3507 | -250.7308   |
| log_o_Alteromonadales | CardioEmbolicStroke | MR Egger                  | 5  | 1.7635 | 0.7604 | 4.0898 | 0.2780 | -0.2030 | 0.1689 | 0.3155 | 2.2699  | 0.6862 | 16330.3270  |
| log_o_Alteromonadales | CardioEmbolicStroke | Weighted median           | 5  | 1.0924 | 0.9195 | 1.2977 | 0.3146 | -0.2030 | 0.1689 | 0.3155 | 2.2699  | 0.6862 | 16330.3270  |
| log_o_Alteromonadales | CardioEmbolicStroke | Inverse variance weighted | 5  | 1.0592 | 0.9293 | 1.2074 | 0.3888 | -0.2030 | 0.1689 | 0.3155 | 2.2699  | 0.6862 | 16330.3270  |
| log_o_Alteromonadales | CardioEmbolicStroke | Simple mode               | 5  | 1.1059 | 0.8810 | 1.3882 | 0.4343 | -0.2030 | 0.1689 | 0.3155 | 2.2699  | 0.6862 | 16330.3270  |
| log_o_Alteromonadales | CardioEmbolicStroke | Weighted mode             | 5  | 1.0958 | 0.8746 | 1.3729 | 0.4709 | -0.2030 | 0.1689 | 0.3155 | 2.2699  | 0.6862 | 16330.3270  |
| log_o_Alteromonadales | IschemicStroke      | MR Egger                  | 5  | 0.9259 | 0.7636 | 1.1226 | 0.4905 | 0.0329  | 0.0387 | 0.4583 | 2.7535  | 0.4312 | 138171.6288 |
| log_o_Alteromonadales | IschemicStroke      | Weighted median           | 5  | 1.0125 | 0.9744 | 1.0521 | 0.5252 | 0.0329  | 0.0387 | 0.4583 | 2.7535  | 0.4312 | 138171.6288 |
| log_o_Alteromonadales | IschemicStroke      | Inverse variance weighted | 5  | 1.0054 | 0.9756 | 1.0362 | 0.7251 | 0.0329  | 0.0387 | 0.4583 | 2.7535  | 0.4312 | 138171.6288 |
| log_o_Alteromonadales | IschemicStroke      | Simple mode               | 5  | 1.0117 | 0.9594 | 1.0668 | 0.6898 | 0.0329  | 0.0387 | 0.4583 | 2.7535  | 0.4312 | 138171.6288 |
| log_o_Alteromonadales | IschemicStroke      | Weighted mode             | 5  | 1.0129 | 0.9638 | 1.0645 | 0.6395 | 0.0329  | 0.0387 | 0.4583 | 2.7535  | 0.4312 | 138171.6288 |
| log_o_Alteromonadales | LargeArteryStroke   | MR Egger                  | 5  | 0.7856 | 0.3476 | 1.7755 | 0.6026 | 0.1355  | 0.1635 | 0.4681 | 4.9806  | 0.1732 | 17540.4015  |
| log_o_Alteromonadales | LargeArteryStroke   | Weighted median           | 5  | 1.1085 | 0.9625 | 1.2766 | 0.1527 | 0.1355  | 0.1635 | 0.4681 | 4.9806  | 0.1732 | 17540.4015  |
| log_o_Alteromonadales | LargeArteryStroke   | Inverse variance weighted | 5  | 1.1043 | 0.9787 | 1.2461 | 0.1073 | 0.1355  | 0.1635 | 0.4681 | 4.9806  | 0.1732 | 17540.4015  |
| log_o_Alteromonadales | LargeArteryStroke   | Simple mode               | 5  | 1.0991 | 0.8853 | 1.3644 | 0.4401 | 0.1355  | 0.1635 | 0.4681 | 4.9806  | 0.1732 | 17540.4015  |
| log_o_Alteromonadales | LargeArteryStroke   | Weighted mode             | 5  | 1.1069 | 0.9007 | 1.3604 | 0.3888 | 0.1355  | 0.1635 | 0.4681 | 4.9806  | 0.1732 | 17540.4015  |
| log_o_Alteromonadales | SmallVesselStroke   | MR Egger                  | 5  | 0.8573 | 0.6043 | 1.2161 | 0.4516 | 0.0674  | 0.0702 | 0.4078 | 2.6028  | 0.6263 | 78074.4290  |
| log_o_Alteromonadales | SmallVesselStroke   | Weighted median           | 5  | 1.0173 | 0.9455 | 1.0945 | 0.6460 | 0.0674  | 0.0702 | 0.4078 | 2.6028  | 0.6263 | 78074.4290  |
| log_o_Alteromonadales | SmallVesselStroke   | Inverse variance weighted | 5  | 1.0154 | 0.9616 | 1.0721 | 0.5832 | 0.0674  | 0.0702 | 0.4078 | 2.6028  | 0.6263 | 78074.4290  |
| log_o_Alteromonadales | SmallVesselStroke   | Simple mode               | 5  | 1.0356 | 0.9326 | 1.1500 | 0.5482 | 0.0674  | 0.0702 | 0.4078 | 2.6028  | 0.6263 | 78074.4290  |
| log_o_Alteromonadales | SmallVesselStroke   | Weighted mode             | 5  | 0.9852 | 0.8894 | 1.0913 | 0.7889 | 0.0674  | 0.0702 | 0.4078 | 2.6028  | 0.6263 | 78074.4290  |
| log_o_Alteromonadales | Stroke              | MR Egger                  | 5  | 1.0085 | 0.8545 | 1.1901 | 0.9269 | 0.0008  | 0.0333 | 0.9826 | 1.0117  | 0.7984 | 194764.4367 |
| log_o_Alteromonadales | Stroke              | Weighted median           | 5  | 1.0122 | 0.9804 | 1.0450 | 0.4561 | 0.0008  | 0.0333 | 0.9826 | 1.0117  | 0.7984 | 194764.4367 |
| log_o_Alteromonadales | Stroke              | Inverse variance weighted | 5  | 1.0105 | 0.9848 | 1.0367 | 0.4275 | 0.0008  | 0.0333 | 0.9826 | 1.0117  | 0.7984 | 194764.4367 |
| log_o_Alteromonadales | Stroke              | Simple mode               | 5  | 1.0174 | 0.9753 | 1.0613 | 0.4682 | 0.0008  | 0.0333 | 0.9826 | 1.0117  | 0.7984 | 194764.4367 |
| log_o_Alteromonadales | Stroke              | Weighted mode             | 5  | 1.0156 | 0.9749 | 1.0579 | 0.4992 | 0.0008  | 0.0333 | 0.9826 | 1.0117  | 0.7984 | 194764.4367 |
| log_o_Caulobacterales | CardioEmbolicStroke | MR Egger                  | 8  | 0.9352 | 0.6350 | 1.3774 | 0.7461 | 0.0081  | 0.0886 | 0.9301 | 1.3841  | 0.9668 | -261.8437   |
| log_o_Caulobacterales | CardioEmbolicStroke | Weighted median           | 8  | 0.9747 | 0.8603 | 1.1043 | 0.6875 | 0.0081  | 0.0886 | 0.9301 | 1.3841  | 0.9668 | -261.8437   |
| log_o_Caulobacterales | CardioEmbolicStroke | Inverse variance weighted | 8  | 0.9517 | 0.8621 | 1.0506 | 0.3266 | 0.0081  | 0.0886 | 0.9301 | 1.3841  | 0.9668 | -261.8437   |
| log_o_Caulobacterales | CardioEmbolicStroke | Simple mode               | 8  | 0.9761 | 0.8171 | 1.1661 | 0.7974 | 0.0081  | 0.0886 | 0.9301 | 1.3841  | 0.9668 | -261.8437   |
| log_o_Caulobacterales | CardioEmbolicStroke | Weighted mode             | 8  | 0.9761 | 0.8199 | 1.1621 | 0.7935 | 0.0081  | 0.0886 | 0.9301 | 1.3841  | 0.9668 | -261.8437   |
| log_o_Caulobacterales | IschemicStroke      | MR Egger                  | 12 | 1.0078 | 0.9417 | 1.0785 | 0.8264 | -0.0065 | 0.0167 | 0.7077 | 8.8519  | 0.5462 | -166.1230   |
| log_o_Caulobacterales | IschemicStroke      | Weighted median           | 12 | 0.9909 | 0.9647 | 1.0180 | 0.5075 | -0.0065 | 0.0167 | 0.7077 | 8.8519  | 0.5462 | -166.1230   |
| log_o_Caulobacterales | IschemicStroke      | Inverse variance weighted | 12 | 0.9951 | 0.9751 | 1.0154 | 0.6314 | -0.0065 | 0.0167 | 0.7077 | 8.8519  | 0.5462 | -166.1230   |
| log_o_Caulobacterales | IschemicStroke      | Simple mode               | 12 | 0.9820 | 0.9394 | 1.0266 | 0.4404 | -0.0065 | 0.0167 | 0.7077 | 8.8519  | 0.5462 | -166.1230   |
| log_o_Caulobacterales | IschemicStroke      | Weighted mode             | 12 | 0.9857 | 0.9417 | 1.0319 | 0.5504 | -0.0065 | 0.0167 | 0.7077 | 8.8519  | 0.5462 | -166.1230   |

|                              |                     |                           |    |        |        |        |        |         |        |        |         |        |             |
|------------------------------|---------------------|---------------------------|----|--------|--------|--------|--------|---------|--------|--------|---------|--------|-------------|
| log_o_Caulobacterales        | LargeArteryStroke   | MR Egger                  | 10 | 0.8980 | 0.7034 | 1.1465 | 0.4131 | 0.0640  | 0.0587 | 0.3072 | 10.1299 | 0.3401 | -68.2566    |
| log_o_Caulobacterales        | LargeArteryStroke   | Weighted median           | 10 | 0.9861 | 0.8949 | 1.0867 | 0.7783 | 0.0640  | 0.0587 | 0.3072 | 10.1299 | 0.3401 | -68.2566    |
| log_o_Caulobacterales        | LargeArteryStroke   | Inverse variance weighted | 10 | 1.0224 | 0.9497 | 1.1005 | 0.5562 | 0.0640  | 0.0587 | 0.3072 | 10.1299 | 0.3401 | -68.2566    |
| log_o_Caulobacterales        | LargeArteryStroke   | Simple mode               | 10 | 0.9544 | 0.8181 | 1.1134 | 0.5674 | 0.0640  | 0.0587 | 0.3072 | 10.1299 | 0.3401 | -68.2566    |
| log_o_Caulobacterales        | LargeArteryStroke   | Weighted mode             | 10 | 0.9544 | 0.8253 | 1.1037 | 0.5447 | 0.0640  | 0.0587 | 0.3072 | 10.1299 | 0.3401 | -68.2566    |
| log_o_Caulobacterales        | SmallVesselStroke   | MR Egger                  | 10 | 1.1066 | 0.9738 | 1.2576 | 0.1591 | -0.0461 | 0.0309 | 0.1733 | 7.0481  | 0.6321 | -107.6743   |
| log_o_Caulobacterales        | SmallVesselStroke   | Weighted median           | 10 | 0.9923 | 0.9430 | 1.0441 | 0.7650 | -0.0461 | 0.0309 | 0.1733 | 7.0481  | 0.6321 | -107.6743   |
| log_o_Caulobacterales        | SmallVesselStroke   | Inverse variance weighted | 10 | 1.0083 | 0.9704 | 1.0477 | 0.6726 | -0.0461 | 0.0309 | 0.1733 | 7.0481  | 0.6321 | -107.6743   |
| log_o_Caulobacterales        | SmallVesselStroke   | Simple mode               | 10 | 0.9663 | 0.8812 | 1.0595 | 0.4838 | -0.0461 | 0.0309 | 0.1733 | 7.0481  | 0.6321 | -107.6743   |
| log_o_Caulobacterales        | SmallVesselStroke   | Weighted mode             | 10 | 0.9689 | 0.8878 | 1.0574 | 0.4966 | -0.0461 | 0.0309 | 0.1733 | 7.0481  | 0.6321 | -107.6743   |
| log_o_Caulobacterales        | Stroke              | MR Egger                  | 12 | 1.0241 | 0.9682 | 1.0833 | 0.4249 | -0.0150 | 0.0140 | 0.3095 | 9.3356  | 0.5909 | -170.5988   |
| log_o_Caulobacterales        | Stroke              | Weighted median           | 12 | 0.9933 | 0.9712 | 1.0158 | 0.5544 | -0.0150 | 0.0140 | 0.3095 | 9.3356  | 0.5909 | -170.5988   |
| log_o_Caulobacterales        | Stroke              | Inverse variance weighted | 12 | 0.9946 | 0.9780 | 1.0114 | 0.5253 | -0.0150 | 0.0140 | 0.3095 | 9.3356  | 0.5909 | -170.5988   |
| log_o_Caulobacterales        | Stroke              | Simple mode               | 12 | 0.9874 | 0.9514 | 1.0246 | 0.5149 | -0.0150 | 0.0140 | 0.3095 | 9.3356  | 0.5909 | -170.5988   |
| log_o_Caulobacterales        | Stroke              | Weighted mode             | 12 | 0.9870 | 0.9544 | 1.0206 | 0.4592 | -0.0150 | 0.0140 | 0.3095 | 9.3356  | 0.5909 | -170.5988   |
| log_o_Rhizobiales            | CardioEmbolicStroke | MR Egger                  | 4  | 1.1103 | 0.5440 | 2.2660 | 0.8008 | -0.0867 | 0.1706 | 0.6618 | 7.1399  | 0.0282 | -1553.6458  |
| log_o_Rhizobiales            | CardioEmbolicStroke | Weighted median           | 4  | 0.9401 | 0.7874 | 1.1224 | 0.4946 | -0.0867 | 0.1706 | 0.6618 | 7.1399  | 0.0282 | -1553.6458  |
| log_o_Rhizobiales            | CardioEmbolicStroke | Inverse variance weighted | 4  | 0.9323 | 0.7612 | 1.1418 | 0.4977 | -0.0867 | 0.1706 | 0.6618 | 7.1399  | 0.0282 | -1553.6458  |
| log_o_Rhizobiales            | CardioEmbolicStroke | Simple mode               | 4  | 0.8140 | 0.5703 | 1.1617 | 0.3392 | -0.0867 | 0.1706 | 0.6618 | 7.1399  | 0.0282 | -1553.6458  |
| log_o_Rhizobiales            | CardioEmbolicStroke | Weighted mode             | 4  | 1.0779 | 0.7740 | 1.5012 | 0.6871 | -0.0867 | 0.1706 | 0.6618 | 7.1399  | 0.0282 | -1553.6458  |
| log_o_Rhizobiales            | IschemicStroke      | MR Egger                  | 4  | 0.9679 | 0.8873 | 1.0558 | 0.5383 | 0.0131  | 0.0208 | 0.5928 | 0.9361  | 0.6262 | -36338.0301 |
| log_o_Rhizobiales            | IschemicStroke      | Weighted median           | 4  | 0.9858 | 0.9520 | 1.0207 | 0.4198 | 0.0131  | 0.0208 | 0.5928 | 0.9361  | 0.6262 | -36338.0301 |
| log_o_Rhizobiales            | IschemicStroke      | Inverse variance weighted | 4  | 0.9938 | 0.9659 | 1.0225 | 0.6685 | 0.0131  | 0.0208 | 0.5928 | 0.9361  | 0.6262 | -36338.0301 |
| log_o_Rhizobiales            | IschemicStroke      | Simple mode               | 4  | 0.9843 | 0.9417 | 1.0289 | 0.5346 | 0.0131  | 0.0208 | 0.5928 | 0.9361  | 0.6262 | -36338.0301 |
| log_o_Rhizobiales            | IschemicStroke      | Weighted mode             | 4  | 0.9845 | 0.9438 | 1.0270 | 0.5221 | 0.0131  | 0.0208 | 0.5928 | 0.9361  | 0.6262 | -36338.0301 |
| log_o_Rhizobiales            | LargeArteryStroke   | MR Egger                  | 4  | 1.0361 | 0.7847 | 1.3681 | 0.8260 | -0.0001 | 0.0670 | 0.9993 | 1.8281  | 0.4009 | -6685.4438  |
| log_o_Rhizobiales            | LargeArteryStroke   | Weighted median           | 4  | 1.0113 | 0.9056 | 1.1294 | 0.8419 | -0.0001 | 0.0670 | 0.9993 | 1.8281  | 0.4009 | -6685.4438  |
| log_o_Rhizobiales            | LargeArteryStroke   | Inverse variance weighted | 4  | 1.0359 | 0.9460 | 1.1345 | 0.4462 | -0.0001 | 0.0670 | 0.9993 | 1.8281  | 0.4009 | -6685.4438  |
| log_o_Rhizobiales            | LargeArteryStroke   | Simple mode               | 4  | 0.9862 | 0.8336 | 1.1668 | 0.8819 | -0.0001 | 0.0670 | 0.9993 | 1.8281  | 0.4009 | -6685.4438  |
| log_o_Rhizobiales            | LargeArteryStroke   | Weighted mode             | 4  | 0.9831 | 0.8449 | 1.1438 | 0.8392 | -0.0001 | 0.0670 | 0.9993 | 1.8281  | 0.4009 | -6685.4438  |
| log_o_Rhizobiales            | SmallVesselStroke   | MR Egger                  | 4  | 1.0648 | 0.8625 | 1.3146 | 0.6182 | -0.0283 | 0.0505 | 0.6318 | 3.6436  | 0.1617 | -12452.7397 |
| log_o_Rhizobiales            | SmallVesselStroke   | Weighted median           | 4  | 1.0239 | 0.9588 | 1.0935 | 0.4806 | -0.0283 | 0.0505 | 0.6318 | 3.6436  | 0.1617 | -12452.7397 |
| log_o_Rhizobiales            | SmallVesselStroke   | Inverse variance weighted | 4  | 1.0059 | 0.9467 | 1.0689 | 0.8484 | -0.0283 | 0.0505 | 0.6318 | 3.6436  | 0.1617 | -12452.7397 |
| log_o_Rhizobiales            | SmallVesselStroke   | Simple mode               | 4  | 1.0345 | 0.9495 | 1.1270 | 0.4947 | -0.0283 | 0.0505 | 0.6318 | 3.6436  | 0.1617 | -12452.7397 |
| log_o_Rhizobiales            | SmallVesselStroke   | Weighted mode             | 4  | 1.0287 | 0.9491 | 1.1150 | 0.5401 | -0.0283 | 0.0505 | 0.6318 | 3.6436  | 0.1617 | -12452.7397 |
| log_o_Rhizobiales            | Stroke              | MR Egger                  | 4  | 0.9828 | 0.9101 | 1.0614 | 0.7016 | 0.0045  | 0.0182 | 0.8258 | 0.3117  | 0.8557 | -53986.1013 |
| log_o_Rhizobiales            | Stroke              | Weighted median           | 4  | 0.9891 | 0.9614 | 1.0176 | 0.4498 | 0.0045  | 0.0182 | 0.8258 | 0.3117  | 0.8557 | -53986.1013 |
| log_o_Rhizobiales            | Stroke              | Inverse variance weighted | 4  | 0.9920 | 0.9674 | 1.0171 | 0.5280 | 0.0045  | 0.0182 | 0.8258 | 0.3117  | 0.8557 | -53986.1013 |
| log_o_Rhizobiales            | Stroke              | Simple mode               | 4  | 0.9878 | 0.9525 | 1.0244 | 0.5553 | 0.0045  | 0.0182 | 0.8258 | 0.3117  | 0.8557 | -53986.1013 |
| log_o_Rhizobiales            | Stroke              | Weighted mode             | 4  | 0.9884 | 0.9526 | 1.0254 | 0.5772 | 0.0045  | 0.0182 | 0.8258 | 0.3117  | 0.8557 | -53986.1013 |
| log_o_Thermoanaerobacterales | CardioEmbolicStroke | MR Egger                  | 5  | 0.3001 | 0.0518 | 1.7401 | 0.2721 | 0.4306  | 0.3577 | 0.3150 | 5.5002  | 0.2397 | 1623.0125   |
| log_o_Thermoanaerobacterales | CardioEmbolicStroke | Weighted median           | 5  | 0.9528 | 0.8017 | 1.1322 | 0.5825 | 0.4306  | 0.3577 | 0.3150 | 5.5002  | 0.2397 | 1623.0125   |
| log_o_Thermoanaerobacterales | CardioEmbolicStroke | Inverse variance weighted | 5  | 0.8802 | 0.7601 | 1.0191 | 0.0879 | 0.4306  | 0.3577 | 0.3150 | 5.5002  | 0.2397 | 1623.0125   |
| log_o_Thermoanaerobacterales | CardioEmbolicStroke | Simple mode               | 5  | 0.9610 | 0.7684 | 1.2020 | 0.7451 | 0.4306  | 0.3577 | 0.3150 | 5.5002  | 0.2397 | 1623.0125   |
| log_o_Thermoanaerobacterales | CardioEmbolicStroke | Weighted mode             | 5  | 0.9652 | 0.7817 | 1.1919 | 0.7588 | 0.4306  | 0.3577 | 0.3150 | 5.5002  | 0.2397 | 1623.0125   |
| log_o_Thermoanaerobacterales | IschemicStroke      | MR Egger                  | 11 | 1.0690 | 0.9819 | 1.1637 | 0.1582 | -0.0244 | 0.0220 | 0.2970 | 24.2497 | 0.0070 | -39.4388    |
| log_o_Thermoanaerobacterales | IschemicStroke      | Weighted median           | 11 | 1.0162 | 0.9853 | 1.0480 | 0.3075 | -0.0244 | 0.0220 | 0.2970 | 24.2497 | 0.0070 | -39.4388    |
| log_o_Thermoanaerobacterales | IschemicStroke      | Inverse variance weighted | 11 | 1.0227 | 0.9894 | 1.0571 | 0.1842 | -0.0244 | 0.0220 | 0.2970 | 24.2497 | 0.0070 | -39.4388    |
| log_o_Thermoanaerobacterales | IschemicStroke      | Simple mode               | 11 | 1.0189 | 0.9678 | 1.0727 | 0.4913 | -0.0244 | 0.0220 | 0.2970 | 24.2497 | 0.0070 | -39.4388    |
| log_o_Thermoanaerobacterales | IschemicStroke      | Weighted mode             | 11 | 1.0148 | 0.9718 | 1.0597 | 0.5216 | -0.0244 | 0.0220 | 0.2970 | 24.2497 | 0.0070 | -39.4388    |
| log_o_Thermoanaerobacterales | LargeArteryStroke   | MR Egger                  | 9  | 1.1871 | 0.9619 | 1.4650 | 0.1540 | -0.0809 | 0.0518 | 0.1622 | 9.0257  | 0.3401 | -21.8115    |
| log_o_Thermoanaerobacterales | LargeArteryStroke   | Weighted median           | 9  | 0.9907 | 0.9018 | 1.0883 | 0.8449 | -0.0809 | 0.0518 | 0.1622 | 9.0257  | 0.3401 | -21.8115    |
| log_o_Thermoanaerobacterales | LargeArteryStroke   | Inverse variance weighted | 9  | 1.0147 | 0.9380 | 1.0975 | 0.7165 | -0.0809 | 0.0518 | 0.1622 | 9.0257  | 0.3401 | -21.8115    |

|                              |                     |                           |    |        |        |        |        |         |        |        |         |        |              |
|------------------------------|---------------------|---------------------------|----|--------|--------|--------|--------|---------|--------|--------|---------|--------|--------------|
| log_o_Thermoanaerobacterales | LargeArteryStroke   | Simple mode               | 9  | 1.0002 | 0.8516 | 1.1748 | 0.9977 | -0.0809 | 0.0518 | 0.1622 | 9.0257  | 0.3401 | -21.8115     |
| log_o_Thermoanaerobacterales | LargeArteryStroke   | Weighted mode             | 9  | 0.9925 | 0.8688 | 1.1338 | 0.9144 | -0.0809 | 0.0518 | 0.1622 | 9.0257  | 0.3401 | -21.8115     |
| log_o_Thermoanaerobacterales | SmallVesselStroke   | MR Egger                  | 9  | 1.0519 | 0.8929 | 1.2393 | 0.5641 | 0.0013  | 0.0406 | 0.9759 | 14.5414 | 0.0423 | -36.3670     |
| log_o_Thermoanaerobacterales | SmallVesselStroke   | Weighted median           | 9  | 1.0501 | 0.9880 | 1.1162 | 0.1158 | 0.0013  | 0.0406 | 0.9759 | 14.5414 | 0.0423 | -36.3670     |
| log_o_Thermoanaerobacterales | SmallVesselStroke   | Inverse variance weighted | 9  | 1.0545 | 0.9984 | 1.1138 | 0.0572 | 0.0013  | 0.0406 | 0.9759 | 14.5414 | 0.0423 | -36.3670     |
| log_o_Thermoanaerobacterales | SmallVesselStroke   | Simple mode               | 9  | 1.0613 | 0.9635 | 1.1691 | 0.2623 | 0.0013  | 0.0406 | 0.9759 | 14.5414 | 0.0423 | -36.3670     |
| log_o_Thermoanaerobacterales | SmallVesselStroke   | Weighted mode             | 9  | 1.0493 | 0.9658 | 1.1399 | 0.2881 | 0.0013  | 0.0406 | 0.9759 | 14.5414 | 0.0423 | -36.3670     |
| log_o_Thermoanaerobacterales | Stroke              | MR Egger                  | 11 | 1.0485 | 0.9807 | 1.1209 | 0.1982 | -0.0157 | 0.0175 | 0.3932 | 19.9887 | 0.0294 | -67.9115     |
| log_o_Thermoanaerobacterales | Stroke              | Weighted median           | 11 | 1.0099 | 0.9843 | 1.0362 | 0.4533 | -0.0157 | 0.0175 | 0.3932 | 19.9887 | 0.0294 | -67.9115     |
| log_o_Thermoanaerobacterales | Stroke              | Inverse variance weighted | 11 | 1.0193 | 0.9938 | 1.0454 | 0.1388 | -0.0157 | 0.0175 | 0.3932 | 19.9887 | 0.0294 | -67.9115     |
| log_o_Thermoanaerobacterales | Stroke              | Simple mode               | 11 | 1.0085 | 0.9674 | 1.0514 | 0.6981 | -0.0157 | 0.0175 | 0.3932 | 19.9887 | 0.0294 | -67.9115     |
| log_o_Thermoanaerobacterales | Stroke              | Weighted mode             | 11 | 1.0096 | 0.9680 | 1.0530 | 0.6656 | -0.0157 | 0.0175 | 0.3932 | 19.9887 | 0.0294 | -67.9115     |
| log_p_Chloroflexi            | CardioEmbolicStroke | MR Egger                  | 13 | 1.1321 | 0.7593 | 1.6879 | 0.5550 | -0.0302 | 0.0886 | 0.7394 | 10.2294 | 0.5099 | -55.8548     |
| log_p_Chloroflexi            | CardioEmbolicStroke | Weighted median           | 13 | 1.0857 | 0.9801 | 1.2027 | 0.1152 | -0.0302 | 0.0886 | 0.7394 | 10.2294 | 0.5099 | -55.8548     |
| log_p_Chloroflexi            | CardioEmbolicStroke | Inverse variance weighted | 13 | 1.0574 | 0.9813 | 1.1393 | 0.1430 | -0.0302 | 0.0886 | 0.7394 | 10.2294 | 0.5099 | -55.8548     |
| log_p_Chloroflexi            | CardioEmbolicStroke | Simple mode               | 13 | 1.0790 | 0.9131 | 1.2751 | 0.3896 | -0.0302 | 0.0886 | 0.7394 | 10.2294 | 0.5099 | -55.8548     |
| log_p_Chloroflexi            | CardioEmbolicStroke | Weighted mode             | 13 | 1.0979 | 0.9402 | 1.2821 | 0.2608 | -0.0302 | 0.0886 | 0.7394 | 10.2294 | 0.5099 | -55.8548     |
| log_p_Chloroflexi            | IschemicStroke      | MR Egger                  | 13 | 1.0889 | 0.9604 | 1.2345 | 0.2106 | -0.0335 | 0.0279 | 0.2547 | 23.1772 | 0.0263 | -283.1346    |
| log_p_Chloroflexi            | IschemicStroke      | Weighted median           | 13 | 1.0156 | 0.9903 | 1.0415 | 0.2302 | -0.0335 | 0.0279 | 0.2547 | 23.1772 | 0.0263 | -283.1346    |
| log_p_Chloroflexi            | IschemicStroke      | Inverse variance weighted | 13 | 1.0096 | 0.9858 | 1.0340 | 0.4335 | -0.0335 | 0.0279 | 0.2547 | 23.1772 | 0.0263 | -283.1346    |
| log_p_Chloroflexi            | IschemicStroke      | Simple mode               | 13 | 1.0169 | 0.9725 | 1.0633 | 0.4767 | -0.0335 | 0.0279 | 0.2547 | 23.1772 | 0.0263 | -283.1346    |
| log_p_Chloroflexi            | IschemicStroke      | Weighted mode             | 13 | 1.0169 | 0.9809 | 1.0542 | 0.3807 | -0.0335 | 0.0279 | 0.2547 | 23.1772 | 0.0263 | -283.1346    |
| log_p_Chloroflexi            | LargeArteryStroke   | MR Egger                  | 13 | 0.8899 | 0.5975 | 1.3255 | 0.5777 | 0.0555  | 0.0882 | 0.5421 | 19.2325 | 0.0570 | -72.0653     |
| log_p_Chloroflexi            | LargeArteryStroke   | Weighted median           | 13 | 1.0383 | 0.9552 | 1.1287 | 0.3771 | 0.0555  | 0.0882 | 0.5421 | 19.2325 | 0.0570 | -72.0653     |
| log_p_Chloroflexi            | LargeArteryStroke   | Inverse variance weighted | 13 | 1.0091 | 0.9388 | 1.0846 | 0.8061 | 0.0555  | 0.0882 | 0.5421 | 19.2325 | 0.0570 | -72.0653     |
| log_p_Chloroflexi            | LargeArteryStroke   | Simple mode               | 13 | 1.0981 | 0.9292 | 1.2977 | 0.2938 | 0.0555  | 0.0882 | 0.5421 | 19.2325 | 0.0570 | -72.0653     |
| log_p_Chloroflexi            | LargeArteryStroke   | Weighted mode             | 13 | 1.0981 | 0.9240 | 1.3050 | 0.3090 | 0.0555  | 0.0882 | 0.5421 | 19.2325 | 0.0570 | -72.0653     |
| log_p_Chloroflexi            | SmallVesselStroke   | MR Egger                  | 13 | 1.1201 | 0.8741 | 1.4352 | 0.3892 | -0.0524 | 0.0550 | 0.3611 | 26.5315 | 0.0090 | -148.3917    |
| log_p_Chloroflexi            | SmallVesselStroke   | Weighted median           | 13 | 0.9970 | 0.9522 | 1.0438 | 0.8970 | -0.0524 | 0.0550 | 0.3611 | 26.5315 | 0.0090 | -148.3917    |
| log_p_Chloroflexi            | SmallVesselStroke   | Inverse variance weighted | 13 | 0.9950 | 0.9501 | 1.0420 | 0.8313 | -0.0524 | 0.0550 | 0.3611 | 26.5315 | 0.0090 | -148.3917    |
| log_p_Chloroflexi            | SmallVesselStroke   | Simple mode               | 13 | 0.9935 | 0.9314 | 1.0597 | 0.8454 | -0.0524 | 0.0550 | 0.3611 | 26.5315 | 0.0090 | -148.3917    |
| log_p_Chloroflexi            | SmallVesselStroke   | Weighted mode             | 13 | 1.0010 | 0.9463 | 1.0589 | 0.9727 | -0.0524 | 0.0550 | 0.3611 | 26.5315 | 0.0090 | -148.3917    |
| log_p_Chloroflexi            | Stroke              | MR Egger                  | 13 | 1.0542 | 0.9456 | 1.1753 | 0.3618 | -0.0185 | 0.0241 | 0.4576 | 20.5833 | 0.0380 | -290.3061    |
| log_p_Chloroflexi            | Stroke              | Weighted median           | 13 | 1.0142 | 0.9923 | 1.0366 | 0.2060 | -0.0185 | 0.0241 | 0.4576 | 20.5833 | 0.0380 | -290.3061    |
| log_p_Chloroflexi            | Stroke              | Inverse variance weighted | 13 | 1.0109 | 0.9909 | 1.0312 | 0.2869 | -0.0185 | 0.0241 | 0.4576 | 20.5833 | 0.0380 | -290.3061    |
| log_p_Chloroflexi            | Stroke              | Simple mode               | 13 | 1.0164 | 0.9778 | 1.0566 | 0.4259 | -0.0185 | 0.0241 | 0.4576 | 20.5833 | 0.0380 | -290.3061    |
| log_p_Chloroflexi            | Stroke              | Weighted mode             | 13 | 1.0168 | 0.9851 | 1.0496 | 0.3220 | -0.0185 | 0.0241 | 0.4576 | 20.5833 | 0.0380 | -290.3061    |
| log_p_Cyanobacteria          | CardioEmbolicStroke | MR Egger                  | 5  | 0.6844 | 0.3104 | 1.5088 | 0.4164 | 0.1278  | 0.1503 | 0.4575 | 8.0206  | 0.0908 | -22514.9369  |
| log_p_Cyanobacteria          | CardioEmbolicStroke | Weighted median           | 5  | 1.0267 | 0.8266 | 1.2754 | 0.8114 | 0.1278  | 0.1503 | 0.4575 | 8.0206  | 0.0908 | -22514.9369  |
| log_p_Cyanobacteria          | CardioEmbolicStroke | Inverse variance weighted | 5  | 0.9537 | 0.7855 | 1.1579 | 0.6317 | 0.1278  | 0.1503 | 0.4575 | 8.0206  | 0.0908 | -22514.9369  |
| log_p_Cyanobacteria          | CardioEmbolicStroke | Simple mode               | 5  | 1.0605 | 0.7741 | 1.4529 | 0.7329 | 0.1278  | 0.1503 | 0.4575 | 8.0206  | 0.0908 | -22514.9369  |
| log_p_Cyanobacteria          | CardioEmbolicStroke | Weighted mode             | 5  | 1.0518 | 0.7725 | 1.4320 | 0.7646 | 0.1278  | 0.1503 | 0.4575 | 8.0206  | 0.0908 | -22514.9369  |
| log_p_Cyanobacteria          | IschemicStroke      | MR Egger                  | 5  | 0.9968 | 0.8846 | 1.1233 | 0.9619 | 0.0013  | 0.0228 | 0.9596 | 1.8682  | 0.6002 | -565167.1018 |
| log_p_Cyanobacteria          | IschemicStroke      | Weighted median           | 5  | 1.0021 | 0.9632 | 1.0425 | 0.9180 | 0.0013  | 0.0228 | 0.9596 | 1.8682  | 0.6002 | -565167.1018 |
| log_p_Cyanobacteria          | IschemicStroke      | Inverse variance weighted | 5  | 1.0001 | 0.9695 | 1.0316 | 0.9959 | 0.0013  | 0.0228 | 0.9596 | 1.8682  | 0.6002 | -565167.1018 |
| log_p_Cyanobacteria          | IschemicStroke      | Simple mode               | 5  | 1.0023 | 0.9503 | 1.0571 | 0.9375 | 0.0013  | 0.0228 | 0.9596 | 1.8682  | 0.6002 | -565167.1018 |
| log_p_Cyanobacteria          | IschemicStroke      | Weighted mode             | 5  | 1.0023 | 0.9522 | 1.0550 | 0.9351 | 0.0013  | 0.0228 | 0.9596 | 1.8682  | 0.6002 | -565167.1018 |
| log_p_Cyanobacteria          | LargeArteryStroke   | MR Egger                  | 5  | 1.1263 | 0.6197 | 2.0470 | 0.7226 | -0.0532 | 0.1143 | 0.6736 | 7.1450  | 0.0674 | -50908.8557  |
| log_p_Cyanobacteria          | LargeArteryStroke   | Weighted median           | 5  | 1.0580 | 0.9292 | 1.2046 | 0.3946 | -0.0532 | 0.1143 | 0.6736 | 7.1450  | 0.0674 | -50908.8557  |
| log_p_Cyanobacteria          | LargeArteryStroke   | Inverse variance weighted | 5  | 0.9822 | 0.8537 | 1.1300 | 0.8019 | -0.0532 | 0.1143 | 0.6736 | 7.1450  | 0.0674 | -50908.8557  |
| log_p_Cyanobacteria          | LargeArteryStroke   | Simple mode               | 5  | 1.0663 | 0.9113 | 1.2478 | 0.4678 | -0.0532 | 0.1143 | 0.6736 | 7.1450  | 0.0674 | -50908.8557  |
| log_p_Cyanobacteria          | LargeArteryStroke   | Weighted mode             | 5  | 1.0674 | 0.9139 | 1.2467 | 0.4565 | -0.0532 | 0.1143 | 0.6736 | 7.1450  | 0.0674 | -50908.8557  |
| log_p_Cyanobacteria          | SmallVesselStroke   | MR Egger                  | 5  | 1.1463 | 0.9130 | 1.4393 | 0.3245 | -0.0575 | 0.0436 | 0.2783 | 5.3339  | 0.2547 | -116199.5070 |

|                     |                     |                           |    |        |        |        |        |         |        |        |        |        |              |
|---------------------|---------------------|---------------------------|----|--------|--------|--------|--------|---------|--------|--------|--------|--------|--------------|
| log_p_Cyanobacteria | SmallVesselStroke   | Weighted median           | 5  | 0.9614 | 0.8908 | 1.0375 | 0.3111 | -0.0575 | 0.0436 | 0.2783 | 5.3339 | 0.2547 | -116199.5070 |
| log_p_Cyanobacteria | SmallVesselStroke   | Inverse variance weighted | 5  | 0.9886 | 0.9265 | 1.0548 | 0.7286 | -0.0575 | 0.0436 | 0.2783 | 5.3339 | 0.2547 | -116199.5070 |
| log_p_Cyanobacteria | SmallVesselStroke   | Simple mode               | 5  | 0.9345 | 0.8199 | 1.0650 | 0.3672 | -0.0575 | 0.0436 | 0.2783 | 5.3339 | 0.2547 | -116199.5070 |
| log_p_Cyanobacteria | SmallVesselStroke   | Weighted mode             | 5  | 0.9345 | 0.8236 | 1.0603 | 0.3523 | -0.0575 | 0.0436 | 0.2783 | 5.3339 | 0.2547 | -116199.5070 |
| log_p_Cyanobacteria | Stroke              | MR Egger                  | 6  | 0.9810 | 0.8967 | 1.0732 | 0.6968 | 0.0065  | 0.0177 | 0.7329 | 1.9092 | 0.7525 | -10946.6508  |
| log_p_Cyanobacteria | Stroke              | Weighted median           | 6  | 0.9918 | 0.9623 | 1.0221 | 0.5911 | 0.0065  | 0.0177 | 0.7329 | 1.9092 | 0.7525 | -10946.6508  |
| log_p_Cyanobacteria | Stroke              | Inverse variance weighted | 6  | 0.9969 | 0.9725 | 1.0219 | 0.8080 | 0.0065  | 0.0177 | 0.7329 | 1.9092 | 0.7525 | -10946.6508  |
| log_p_Cyanobacteria | Stroke              | Simple mode               | 6  | 0.9923 | 0.9498 | 1.0367 | 0.7428 | 0.0065  | 0.0177 | 0.7329 | 1.9092 | 0.7525 | -10946.6508  |
| log_p_Cyanobacteria | Stroke              | Weighted mode             | 6  | 0.9911 | 0.9521 | 1.0316 | 0.6792 | 0.0065  | 0.0177 | 0.7329 | 1.9092 | 0.7525 | -10946.6508  |
| log_p_Euryarchaeota | CardioEmbolicStroke | MR Egger                  | 7  | 1.2019 | 0.8154 | 1.7715 | 0.3956 | -0.0748 | 0.0855 | 0.4214 | 2.5016 | 0.8683 | -442.7399    |
| log_p_Euryarchaeota | CardioEmbolicStroke | Weighted median           | 7  | 1.0134 | 0.8887 | 1.1557 | 0.8425 | -0.0748 | 0.0855 | 0.4214 | 2.5016 | 0.8683 | -442.7399    |
| log_p_Euryarchaeota | CardioEmbolicStroke | Inverse variance weighted | 7  | 1.0172 | 0.9157 | 1.1300 | 0.7501 | -0.0748 | 0.0855 | 0.4214 | 2.5016 | 0.8683 | -442.7399    |
| log_p_Euryarchaeota | CardioEmbolicStroke | Simple mode               | 7  | 1.0932 | 0.8914 | 1.3406 | 0.4251 | -0.0748 | 0.0855 | 0.4214 | 2.5016 | 0.8683 | -442.7399    |
| log_p_Euryarchaeota | CardioEmbolicStroke | Weighted mode             | 7  | 1.0955 | 0.8927 | 1.3445 | 0.4160 | -0.0748 | 0.0855 | 0.4214 | 2.5016 | 0.8683 | -442.7399    |
| log_p_Euryarchaeota | IschemicStroke      | MR Egger                  | 8  | 0.9931 | 0.9149 | 1.0780 | 0.8748 | 0.0053  | 0.0189 | 0.7907 | 7.7061 | 0.2604 | -319.4677    |
| log_p_Euryarchaeota | IschemicStroke      | Weighted median           | 8  | 1.0031 | 0.9735 | 1.0335 | 0.8418 | 0.0053  | 0.0189 | 0.7907 | 7.7061 | 0.2604 | -319.4677    |
| log_p_Euryarchaeota | IschemicStroke      | Inverse variance weighted | 8  | 1.0041 | 0.9803 | 1.0286 | 0.7362 | 0.0053  | 0.0189 | 0.7907 | 7.7061 | 0.2604 | -319.4677    |
| log_p_Euryarchaeota | IschemicStroke      | Simple mode               | 8  | 1.0058 | 0.9592 | 1.0546 | 0.8187 | 0.0053  | 0.0189 | 0.7907 | 7.7061 | 0.2604 | -319.4677    |
| log_p_Euryarchaeota | IschemicStroke      | Weighted mode             | 8  | 1.0053 | 0.9600 | 1.0528 | 0.8274 | 0.0053  | 0.0189 | 0.7907 | 7.7061 | 0.2604 | -319.4677    |
| log_p_Euryarchaeota | LargeArteryStroke   | MR Egger                  | 8  | 0.8993 | 0.7098 | 1.1396 | 0.4135 | 0.0718  | 0.0546 | 0.2360 | 3.7833 | 0.8044 | -110.4524    |
| log_p_Euryarchaeota | LargeArteryStroke   | Weighted median           | 8  | 1.0603 | 0.9655 | 1.1643 | 0.2204 | 0.0718  | 0.0546 | 0.2360 | 3.7833 | 0.8044 | -110.4524    |
| log_p_Euryarchaeota | LargeArteryStroke   | Inverse variance weighted | 8  | 1.0459 | 0.9711 | 1.1265 | 0.2358 | 0.0718  | 0.0546 | 0.2360 | 3.7833 | 0.8044 | -110.4524    |
| log_p_Euryarchaeota | LargeArteryStroke   | Simple mode               | 8  | 1.0584 | 0.9343 | 1.1990 | 0.4018 | 0.0718  | 0.0546 | 0.2360 | 3.7833 | 0.8044 | -110.4524    |
| log_p_Euryarchaeota | LargeArteryStroke   | Weighted mode             | 8  | 1.0592 | 0.9311 | 1.2050 | 0.4110 | 0.0718  | 0.0546 | 0.2360 | 3.7833 | 0.8044 | -110.4524    |
| log_p_Euryarchaeota | SmallVesselStroke   | MR Egger                  | 8  | 0.9776 | 0.8580 | 1.1138 | 0.7451 | 0.0106  | 0.0301 | 0.7382 | 5.3994 | 0.4937 | -403.5437    |
| log_p_Euryarchaeota | SmallVesselStroke   | Weighted median           | 8  | 0.9897 | 0.9394 | 1.0427 | 0.6964 | 0.0106  | 0.0301 | 0.7382 | 5.3994 | 0.4937 | -403.5437    |
| log_p_Euryarchaeota | SmallVesselStroke   | Inverse variance weighted | 8  | 0.9995 | 0.9593 | 1.0413 | 0.9794 | 0.0106  | 0.0301 | 0.7382 | 5.3994 | 0.4937 | -403.5437    |
| log_p_Euryarchaeota | SmallVesselStroke   | Simple mode               | 8  | 0.9900 | 0.9158 | 1.0703 | 0.8084 | 0.0106  | 0.0301 | 0.7382 | 5.3994 | 0.4937 | -403.5437    |
| log_p_Euryarchaeota | SmallVesselStroke   | Weighted mode             | 8  | 0.9888 | 0.9182 | 1.0649 | 0.7753 | 0.0106  | 0.0301 | 0.7382 | 5.3994 | 0.4937 | -403.5437    |
| log_p_Euryarchaeota | Stroke              | MR Egger                  | 8  | 1.0075 | 0.9386 | 1.0814 | 0.8433 | -0.0023 | 0.0164 | 0.8931 | 8.0940 | 0.2313 | -363.4919    |
| log_p_Euryarchaeota | Stroke              | Weighted median           | 8  | 1.0089 | 0.9836 | 1.0348 | 0.4932 | -0.0023 | 0.0164 | 0.8931 | 8.0940 | 0.2313 | -363.4919    |
| log_p_Euryarchaeota | Stroke              | Inverse variance weighted | 8  | 1.0027 | 0.9820 | 1.0237 | 0.8025 | -0.0023 | 0.0164 | 0.8931 | 8.0940 | 0.2313 | -363.4919    |
| log_p_Euryarchaeota | Stroke              | Simple mode               | 8  | 1.0146 | 0.9752 | 1.0556 | 0.4958 | -0.0023 | 0.0164 | 0.8931 | 8.0940 | 0.2313 | -363.4919    |
| log_p_Euryarchaeota | Stroke              | Weighted mode             | 8  | 1.0158 | 0.9784 | 1.0546 | 0.4392 | -0.0023 | 0.0164 | 0.8931 | 8.0940 | 0.2313 | -363.4919    |
| log_p_Fibrobacteres | CardioEmbolicStroke | MR Egger                  | 9  | 1.0320 | 0.7460 | 1.4277 | 0.8545 | -0.0296 | 0.0711 | 0.6898 | 5.6455 | 0.5817 | -206.7046    |
| log_p_Fibrobacteres | CardioEmbolicStroke | Weighted median           | 9  | 0.9709 | 0.8699 | 1.0837 | 0.5986 | -0.0296 | 0.0711 | 0.6898 | 5.6455 | 0.5817 | -206.7046    |
| log_p_Fibrobacteres | CardioEmbolicStroke | Inverse variance weighted | 9  | 0.9656 | 0.8873 | 1.0507 | 0.4166 | -0.0296 | 0.0711 | 0.6898 | 5.6455 | 0.5817 | -206.7046    |
| log_p_Fibrobacteres | CardioEmbolicStroke | Simple mode               | 9  | 0.9597 | 0.8126 | 1.1334 | 0.6407 | -0.0296 | 0.0711 | 0.6898 | 5.6455 | 0.5817 | -206.7046    |
| log_p_Fibrobacteres | CardioEmbolicStroke | Weighted mode             | 9  | 0.9546 | 0.8173 | 1.1151 | 0.5743 | -0.0296 | 0.0711 | 0.6898 | 5.6455 | 0.5817 | -206.7046    |
| log_p_Fibrobacteres | IschemicStroke      | MR Egger                  | 10 | 0.9855 | 0.9321 | 1.0418 | 0.6196 | 0.0020  | 0.0128 | 0.8812 | 5.4566 | 0.7078 | -362.1545    |
| log_p_Fibrobacteres | IschemicStroke      | Weighted median           | 10 | 0.9880 | 0.9645 | 1.0121 | 0.3256 | 0.0020  | 0.0128 | 0.8812 | 5.4566 | 0.7078 | -362.1545    |
| log_p_Fibrobacteres | IschemicStroke      | Inverse variance weighted | 10 | 0.9895 | 0.9714 | 1.0080 | 0.2650 | 0.0020  | 0.0128 | 0.8812 | 5.4566 | 0.7078 | -362.1545    |
| log_p_Fibrobacteres | IschemicStroke      | Simple mode               | 10 | 0.9827 | 0.9451 | 1.0219 | 0.4059 | 0.0020  | 0.0128 | 0.8812 | 5.4566 | 0.7078 | -362.1545    |
| log_p_Fibrobacteres | IschemicStroke      | Weighted mode             | 10 | 0.9851 | 0.9477 | 1.0239 | 0.4649 | 0.0020  | 0.0128 | 0.8812 | 5.4566 | 0.7078 | -362.1545    |
| log_p_Fibrobacteres | LargeArteryStroke   | MR Egger                  | 10 | 0.9584 | 0.8005 | 1.1474 | 0.6556 | 0.0187  | 0.0415 | 0.6650 | 5.8213 | 0.6672 | -59.4049     |
| log_p_Fibrobacteres | LargeArteryStroke   | Weighted median           | 10 | 1.0134 | 0.9330 | 1.1007 | 0.7527 | 0.0187  | 0.0415 | 0.6650 | 5.8213 | 0.6672 | -59.4049     |
| log_p_Fibrobacteres | LargeArteryStroke   | Inverse variance weighted | 10 | 0.9964 | 0.9384 | 1.0580 | 0.9060 | 0.0187  | 0.0415 | 0.6650 | 5.8213 | 0.6672 | -59.4049     |
| log_p_Fibrobacteres | LargeArteryStroke   | Simple mode               | 10 | 1.0462 | 0.9165 | 1.1942 | 0.5205 | 0.0187  | 0.0415 | 0.6650 | 5.8213 | 0.6672 | -59.4049     |
| log_p_Fibrobacteres | LargeArteryStroke   | Weighted mode             | 10 | 1.0422 | 0.9161 | 1.1856 | 0.5456 | 0.0187  | 0.0415 | 0.6650 | 5.8213 | 0.6672 | -59.4049     |
| log_p_Fibrobacteres | SmallVesselStroke   | MR Egger                  | 10 | 1.0169 | 0.9205 | 1.1234 | 0.7503 | -0.0055 | 0.0230 | 0.8159 | 5.4644 | 0.7070 | -193.8612    |
| log_p_Fibrobacteres | SmallVesselStroke   | Weighted median           | 10 | 1.0039 | 0.9602 | 1.0497 | 0.8628 | -0.0055 | 0.0230 | 0.8159 | 5.4644 | 0.7070 | -193.8612    |
| log_p_Fibrobacteres | SmallVesselStroke   | Inverse variance weighted | 10 | 1.0052 | 0.9724 | 1.0392 | 0.7585 | -0.0055 | 0.0230 | 0.8159 | 5.4644 | 0.7070 | -193.8612    |
| log_p_Fibrobacteres | SmallVesselStroke   | Simple mode               | 10 | 1.0003 | 0.9347 | 1.0705 | 0.9924 | -0.0055 | 0.0230 | 0.8159 | 5.4644 | 0.7070 | -193.8612    |

|                             |                     |                           |    |        |        |        |        |         |        |        |         |        |            |
|-----------------------------|---------------------|---------------------------|----|--------|--------|--------|--------|---------|--------|--------|---------|--------|------------|
| log_p_Fibrobacteres         | SmallVesselStroke   | Weighted mode             | 10 | 1.0003 | 0.9394 | 1.0653 | 0.9918 | -0.0055 | 0.0230 | 0.8159 | 5.4644  | 0.7070 | -193.8612  |
| log_p_Fibrobacteres         | Stroke              | MR Egger                  | 10 | 0.9969 | 0.9493 | 1.0470 | 0.9055 | -0.0001 | 0.0112 | 0.9943 | 4.9618  | 0.7617 | -601.1841  |
| log_p_Fibrobacteres         | Stroke              | Weighted median           | 10 | 0.9996 | 0.9782 | 1.0215 | 0.9699 | -0.0001 | 0.0112 | 0.9943 | 4.9618  | 0.7617 | -601.1841  |
| log_p_Fibrobacteres         | Stroke              | Inverse variance weighted | 10 | 0.9968 | 0.9809 | 1.0129 | 0.6940 | -0.0001 | 0.0112 | 0.9943 | 4.9618  | 0.7617 | -601.1841  |
| log_p_Fibrobacteres         | Stroke              | Simple mode               | 10 | 1.0087 | 0.9741 | 1.0446 | 0.6370 | -0.0001 | 0.0112 | 0.9943 | 4.9618  | 0.7617 | -601.1841  |
| log_p_Fibrobacteres         | Stroke              | Weighted mode             | 10 | 1.0068 | 0.9720 | 1.0428 | 0.7140 | -0.0001 | 0.0112 | 0.9943 | 4.9618  | 0.7617 | -601.1841  |
| log_p_Tenericutes           | CardioEmbolicStroke | MR Egger                  | 6  | 0.9921 | 0.5896 | 1.6695 | 0.9777 | 0.0229  | 0.1102 | 0.8455 | 2.2222  | 0.6950 | -1668.1269 |
| log_p_Tenericutes           | CardioEmbolicStroke | Weighted median           | 6  | 1.0969 | 0.9584 | 1.2555 | 0.1793 | 0.0229  | 0.1102 | 0.8455 | 2.2222  | 0.6950 | -1668.1269 |
| log_p_Tenericutes           | CardioEmbolicStroke | Inverse variance weighted | 6  | 1.0470 | 0.9352 | 1.1723 | 0.4252 | 0.0229  | 0.1102 | 0.8455 | 2.2222  | 0.6950 | -1668.1269 |
| log_p_Tenericutes           | CardioEmbolicStroke | Simple mode               | 6  | 1.1011 | 0.9098 | 1.3325 | 0.3680 | 0.0229  | 0.1102 | 0.8455 | 2.2222  | 0.6950 | -1668.1269 |
| log_p_Tenericutes           | CardioEmbolicStroke | Weighted mode             | 6  | 1.1026 | 0.9147 | 1.3292 | 0.3525 | 0.0229  | 0.1102 | 0.8455 | 2.2222  | 0.6950 | -1668.1269 |
| log_p_Tenericutes           | IschemicStroke      | MR Egger                  | 9  | 0.9786 | 0.9134 | 1.0485 | 0.5583 | 0.0090  | 0.0163 | 0.6003 | 5.2951  | 0.6240 | -189.8541  |
| log_p_Tenericutes           | IschemicStroke      | Weighted median           | 9  | 1.0022 | 0.9732 | 1.0321 | 0.8824 | 0.0090  | 0.0163 | 0.6003 | 5.2951  | 0.6240 | -189.8541  |
| log_p_Tenericutes           | IschemicStroke      | Inverse variance weighted | 9  | 0.9967 | 0.9747 | 1.0191 | 0.7683 | 0.0090  | 0.0163 | 0.6003 | 5.2951  | 0.6240 | -189.8541  |
| log_p_Tenericutes           | IschemicStroke      | Simple mode               | 9  | 1.0053 | 0.9667 | 1.0454 | 0.7979 | 0.0090  | 0.0163 | 0.6003 | 5.2951  | 0.6240 | -189.8541  |
| log_p_Tenericutes           | IschemicStroke      | Weighted mode             | 9  | 1.0057 | 0.9671 | 1.0458 | 0.7842 | 0.0090  | 0.0163 | 0.6003 | 5.2951  | 0.6240 | -189.8541  |
| log_p_Tenericutes           | LargeArteryStroke   | MR Egger                  | 8  | 1.0000 | 0.6390 | 1.5650 | 0.9999 | 0.0153  | 0.1039 | 0.8874 | 20.8699 | 0.0019 | -20.3769   |
| log_p_Tenericutes           | LargeArteryStroke   | Weighted median           | 8  | 1.0640 | 0.9522 | 1.1889 | 0.2737 | 0.0153  | 0.1039 | 0.8874 | 20.8699 | 0.0019 | -20.3769   |
| log_p_Tenericutes           | LargeArteryStroke   | Inverse variance weighted | 8  | 1.0326 | 0.9075 | 1.1750 | 0.6266 | 0.0153  | 0.1039 | 0.8874 | 20.8699 | 0.0019 | -20.3769   |
| log_p_Tenericutes           | LargeArteryStroke   | Simple mode               | 8  | 1.1467 | 0.9339 | 1.4079 | 0.2324 | 0.0153  | 0.1039 | 0.8874 | 20.8699 | 0.0019 | -20.3769   |
| log_p_Tenericutes           | LargeArteryStroke   | Weighted mode             | 8  | 1.1237 | 0.9320 | 1.3548 | 0.2613 | 0.0153  | 0.1039 | 0.8874 | 20.8699 | 0.0019 | -20.3769   |
| log_p_Tenericutes           | SmallVesselStroke   | MR Egger                  | 9  | 0.9829 | 0.8648 | 1.1171 | 0.7994 | 0.0067  | 0.0303 | 0.8304 | 7.4298  | 0.3855 | -141.5676  |
| log_p_Tenericutes           | SmallVesselStroke   | Weighted median           | 9  | 0.9672 | 0.9150 | 1.0223 | 0.2382 | 0.0067  | 0.0303 | 0.8304 | 7.4298  | 0.3855 | -141.5676  |
| log_p_Tenericutes           | SmallVesselStroke   | Inverse variance weighted | 9  | 0.9965 | 0.9573 | 1.0373 | 0.8641 | 0.0067  | 0.0303 | 0.8304 | 7.4298  | 0.3855 | -141.5676  |
| log_p_Tenericutes           | SmallVesselStroke   | Simple mode               | 9  | 0.9520 | 0.8673 | 1.0448 | 0.3302 | 0.0067  | 0.0303 | 0.8304 | 7.4298  | 0.3855 | -141.5676  |
| log_p_Tenericutes           | SmallVesselStroke   | Weighted mode             | 9  | 0.9525 | 0.8655 | 1.0482 | 0.3480 | 0.0067  | 0.0303 | 0.8304 | 7.4298  | 0.3855 | -141.5676  |
| log_p_Tenericutes           | Stroke              | MR Egger                  | 12 | 1.0188 | 0.9551 | 1.0866 | 0.5846 | -0.0051 | 0.0156 | 0.7523 | 13.8829 | 0.1784 | -69.3557   |
| log_p_Tenericutes           | Stroke              | Weighted median           | 12 | 1.0136 | 0.9889 | 1.0389 | 0.2847 | -0.0051 | 0.0156 | 0.7523 | 13.8829 | 0.1784 | -69.3557   |
| log_p_Tenericutes           | Stroke              | Inverse variance weighted | 12 | 1.0085 | 0.9885 | 1.0289 | 0.4058 | -0.0051 | 0.0156 | 0.7523 | 13.8829 | 0.1784 | -69.3557   |
| log_p_Tenericutes           | Stroke              | Simple mode               | 12 | 1.0155 | 0.9783 | 1.0542 | 0.4361 | -0.0051 | 0.0156 | 0.7523 | 13.8829 | 0.1784 | -69.3557   |
| log_p_Tenericutes           | Stroke              | Weighted mode             | 12 | 1.0151 | 0.9847 | 1.0465 | 0.3546 | -0.0051 | 0.0156 | 0.7523 | 13.8829 | 0.1784 | -69.3557   |
| log_s_Abiotrophia_defectiva | CardioEmbolicStroke | MR Egger                  | 8  | 1.3794 | 0.7952 | 2.3926 | 0.2960 | -0.1263 | 0.1123 | 0.3034 | 7.1302  | 0.4155 | -550.3984  |
| log_s_Abiotrophia_defectiva | CardioEmbolicStroke | Weighted median           | 8  | 1.0485 | 0.9252 | 1.1883 | 0.4579 | -0.1263 | 0.1123 | 0.3034 | 7.1302  | 0.4155 | -550.3984  |
| log_s_Abiotrophia_defectiva | CardioEmbolicStroke | Inverse variance weighted | 8  | 1.0106 | 0.9141 | 1.1173 | 0.8368 | -0.1263 | 0.1123 | 0.3034 | 7.1302  | 0.4155 | -550.3984  |
| log_s_Abiotrophia_defectiva | CardioEmbolicStroke | Simple mode               | 8  | 1.0558 | 0.8829 | 1.2627 | 0.5704 | -0.1263 | 0.1123 | 0.3034 | 7.1302  | 0.4155 | -550.3984  |
| log_s_Abiotrophia_defectiva | CardioEmbolicStroke | Weighted mode             | 8  | 1.0745 | 0.8997 | 1.2833 | 0.4535 | -0.1263 | 0.1123 | 0.3034 | 7.1302  | 0.4155 | -550.3984  |
| log_s_Abiotrophia_defectiva | IschemicStroke      | MR Egger                  | 9  | 1.0925 | 1.0072 | 1.1850 | 0.0704 | -0.0393 | 0.0173 | 0.0577 | 11.8903 | 0.1562 | -281.5181  |
| log_s_Abiotrophia_defectiva | IschemicStroke      | Weighted median           | 9  | 1.0024 | 0.9719 | 1.0340 | 0.8782 | -0.0393 | 0.0173 | 0.0577 | 11.8903 | 0.1562 | -281.5181  |
| log_s_Abiotrophia_defectiva | IschemicStroke      | Inverse variance weighted | 9  | 0.9978 | 0.9718 | 1.0246 | 0.8721 | -0.0393 | 0.0173 | 0.0577 | 11.8903 | 0.1562 | -281.5181  |
| log_s_Abiotrophia_defectiva | IschemicStroke      | Simple mode               | 9  | 1.0011 | 0.9449 | 1.0606 | 0.9717 | -0.0393 | 0.0173 | 0.0577 | 11.8903 | 0.1562 | -281.5181  |
| log_s_Abiotrophia_defectiva | IschemicStroke      | Weighted mode             | 9  | 1.0024 | 0.9477 | 1.0603 | 0.9347 | -0.0393 | 0.0173 | 0.0577 | 11.8903 | 0.1562 | -281.5181  |
| log_s_Abiotrophia_defectiva | LargeArteryStroke   | MR Egger                  | 8  | 0.8680 | 0.5782 | 1.3029 | 0.5200 | 0.0312  | 0.0830 | 0.7201 | 5.0777  | 0.5339 | -557.2491  |
| log_s_Abiotrophia_defectiva | LargeArteryStroke   | Weighted median           | 8  | 0.9268 | 0.8398 | 1.0228 | 0.1307 | 0.0312  | 0.0830 | 0.7201 | 5.0777  | 0.5339 | -557.2491  |
| log_s_Abiotrophia_defectiva | LargeArteryStroke   | Inverse variance weighted | 8  | 0.9371 | 0.8704 | 1.0088 | 0.0843 | 0.0312  | 0.0830 | 0.7201 | 5.0777  | 0.5339 | -557.2491  |
| log_s_Abiotrophia_defectiva | LargeArteryStroke   | Simple mode               | 8  | 0.9021 | 0.7622 | 1.0677 | 0.2698 | 0.0312  | 0.0830 | 0.7201 | 5.0777  | 0.5339 | -557.2491  |
| log_s_Abiotrophia_defectiva | LargeArteryStroke   | Weighted mode             | 8  | 0.8911 | 0.7649 | 1.0380 | 0.1822 | 0.0312  | 0.0830 | 0.7201 | 5.0777  | 0.5339 | -557.2491  |
| log_s_Abiotrophia_defectiva | SmallVesselStroke   | MR Egger                  | 8  | 1.0595 | 0.8028 | 1.3983 | 0.6973 | -0.0360 | 0.0566 | 0.5482 | 8.8863  | 0.1801 | -1010.5851 |
| log_s_Abiotrophia_defectiva | SmallVesselStroke   | Weighted median           | 8  | 0.9859 | 0.9300 | 1.0451 | 0.6330 | -0.0360 | 0.0566 | 0.5482 | 8.8863  | 0.1801 | -1010.5851 |
| log_s_Abiotrophia_defectiva | SmallVesselStroke   | Inverse variance weighted | 8  | 0.9697 | 0.9243 | 1.0173 | 0.2080 | -0.0360 | 0.0566 | 0.5482 | 8.8863  | 0.1801 | -1010.5851 |
| log_s_Abiotrophia_defectiva | SmallVesselStroke   | Simple mode               | 8  | 1.0122 | 0.9181 | 1.1160 | 0.8146 | -0.0360 | 0.0566 | 0.5482 | 8.8863  | 0.1801 | -1010.5851 |
| log_s_Abiotrophia_defectiva | SmallVesselStroke   | Weighted mode             | 8  | 1.0147 | 0.9254 | 1.1126 | 0.7649 | -0.0360 | 0.0566 | 0.5482 | 8.8863  | 0.1801 | -1010.5851 |
| log_s_Abiotrophia_defectiva | Stroke              | MR Egger                  | 9  | 1.0902 | 1.0142 | 1.1718 | 0.0517 | -0.0374 | 0.0155 | 0.0467 | 15.0418 | 0.0583 | -311.1555  |
| log_s_Abiotrophia_defectiva | Stroke              | Weighted median           | 9  | 1.0005 | 0.9740 | 1.0278 | 0.9696 | -0.0374 | 0.0155 | 0.0467 | 15.0418 | 0.0583 | -311.1555  |

|                                  |                     |                           |   |        |        |        |        |         |        |        |         |        |            |
|----------------------------------|---------------------|---------------------------|---|--------|--------|--------|--------|---------|--------|--------|---------|--------|------------|
| log_s_Abiotrophia_defectiva      | Stroke              | Inverse variance weighted | 9 | 1.0009 | 0.9761 | 1.0264 | 0.9434 | -0.0374 | 0.0155 | 0.0467 | 15.0418 | 0.0583 | -311.1555  |
| log_s_Abiotrophia_defectiva      | Stroke              | Simple mode               | 9 | 1.0064 | 0.9616 | 1.0532 | 0.7918 | -0.0374 | 0.0155 | 0.0467 | 15.0418 | 0.0583 | -311.1555  |
| log_s_Abiotrophia_defectiva      | Stroke              | Weighted mode             | 9 | 1.0096 | 0.9676 | 1.0535 | 0.6703 | -0.0374 | 0.0155 | 0.0467 | 15.0418 | 0.0583 | -311.1555  |
| log_s_Acidaminococcus_intestini  | CardioEmbolicStroke | MR Egger                  | 8 | 2.0330 | 0.9616 | 4.2982 | 0.1126 | -0.3024 | 0.1520 | 0.0937 | 8.6892  | 0.2757 | -505.2738  |
| log_s_Acidaminococcus_intestini  | CardioEmbolicStroke | Weighted median           | 8 | 0.9660 | 0.8291 | 1.1255 | 0.6573 | -0.3024 | 0.1520 | 0.0937 | 8.6892  | 0.2757 | -505.2738  |
| log_s_Acidaminococcus_intestini  | CardioEmbolicStroke | Inverse variance weighted | 8 | 0.9584 | 0.8490 | 1.0819 | 0.4918 | -0.3024 | 0.1520 | 0.0937 | 8.6892  | 0.2757 | -505.2738  |
| log_s_Acidaminococcus_intestini  | CardioEmbolicStroke | Simple mode               | 8 | 1.0994 | 0.8416 | 1.4363 | 0.5094 | -0.3024 | 0.1520 | 0.0937 | 8.6892  | 0.2757 | -505.2738  |
| log_s_Acidaminococcus_intestini  | CardioEmbolicStroke | Weighted mode             | 8 | 1.0900 | 0.8379 | 1.4179 | 0.5414 | -0.3024 | 0.1520 | 0.0937 | 8.6892  | 0.2757 | -505.2738  |
| log_s_Acidaminococcus_intestini  | IschemicStroke      | MR Egger                  | 8 | 1.0845 | 0.9153 | 1.2850 | 0.3849 | -0.0379 | 0.0345 | 0.3140 | 6.2341  | 0.5127 | -3096.4504 |
| log_s_Acidaminococcus_intestini  | IschemicStroke      | Weighted median           | 8 | 0.9894 | 0.9579 | 1.0219 | 0.5184 | -0.0379 | 0.0345 | 0.3140 | 6.2341  | 0.5127 | -3096.4504 |
| log_s_Acidaminococcus_intestini  | IschemicStroke      | Inverse variance weighted | 8 | 0.9871 | 0.9627 | 1.0122 | 0.3110 | -0.0379 | 0.0345 | 0.3140 | 6.2341  | 0.5127 | -3096.4504 |
| log_s_Acidaminococcus_intestini  | IschemicStroke      | Simple mode               | 8 | 0.9936 | 0.9466 | 1.0430 | 0.8026 | -0.0379 | 0.0345 | 0.3140 | 6.2341  | 0.5127 | -3096.4504 |
| log_s_Acidaminococcus_intestini  | IschemicStroke      | Weighted mode             | 8 | 0.9945 | 0.9482 | 1.0430 | 0.8262 | -0.0379 | 0.0345 | 0.3140 | 6.2341  | 0.5127 | -3096.4504 |
| log_s_Acidaminococcus_intestini  | LargeArteryStroke   | MR Egger                  | 8 | 1.4773 | 0.8413 | 2.5939 | 0.2232 | -0.1545 | 0.1140 | 0.2242 | 4.7934  | 0.6852 | -1016.6648 |
| log_s_Acidaminococcus_intestini  | LargeArteryStroke   | Weighted median           | 8 | 1.0195 | 0.9173 | 1.1331 | 0.7199 | -0.1545 | 0.1140 | 0.2242 | 4.7934  | 0.6852 | -1016.6648 |
| log_s_Acidaminococcus_intestini  | LargeArteryStroke   | Inverse variance weighted | 8 | 1.0051 | 0.9264 | 1.0905 | 0.9023 | -0.1545 | 0.1140 | 0.2242 | 4.7934  | 0.6852 | -1016.6648 |
| log_s_Acidaminococcus_intestini  | LargeArteryStroke   | Simple mode               | 8 | 1.0208 | 0.8679 | 1.2007 | 0.8104 | -0.1545 | 0.1140 | 0.2242 | 4.7934  | 0.6852 | -1016.6648 |
| log_s_Acidaminococcus_intestini  | LargeArteryStroke   | Weighted mode             | 8 | 1.0208 | 0.8747 | 1.1915 | 0.8011 | -0.1545 | 0.1140 | 0.2242 | 4.7934  | 0.6852 | -1016.6648 |
| log_s_Acidaminococcus_intestini  | SmallVesselStroke   | MR Egger                  | 8 | 0.9931 | 0.7296 | 1.3517 | 0.9663 | -0.0048 | 0.0626 | 0.9410 | 5.1731  | 0.5218 | -1970.6208 |
| log_s_Acidaminococcus_intestini  | SmallVesselStroke   | Weighted median           | 8 | 0.9921 | 0.9339 | 1.0541 | 0.7984 | -0.0048 | 0.0626 | 0.9410 | 5.1731  | 0.5218 | -1970.6208 |
| log_s_Acidaminococcus_intestini  | SmallVesselStroke   | Inverse variance weighted | 8 | 0.9812 | 0.9379 | 1.0266 | 0.4111 | -0.0048 | 0.0626 | 0.9410 | 5.1731  | 0.5218 | -1970.6208 |
| log_s_Acidaminococcus_intestini  | SmallVesselStroke   | Simple mode               | 8 | 1.0311 | 0.9346 | 1.1377 | 0.5604 | -0.0048 | 0.0626 | 0.9410 | 5.1731  | 0.5218 | -1970.6208 |
| log_s_Acidaminococcus_intestini  | SmallVesselStroke   | Weighted mode             | 8 | 1.0251 | 0.9298 | 1.1301 | 0.6340 | -0.0048 | 0.0626 | 0.9410 | 5.1731  | 0.5218 | -1970.6208 |
| log_s_Acidaminococcus_intestini  | Stroke              | MR Egger                  | 9 | 0.9556 | 0.8252 | 1.1067 | 0.5636 | 0.0138  | 0.0303 | 0.6629 | 9.0619  | 0.2482 | -1138.4691 |
| log_s_Acidaminococcus_intestini  | Stroke              | Weighted median           | 9 | 0.9829 | 0.9567 | 1.0099 | 0.2121 | 0.0138  | 0.0303 | 0.6629 | 9.0619  | 0.2482 | -1138.4691 |
| log_s_Acidaminococcus_intestini  | Stroke              | Inverse variance weighted | 9 | 0.9883 | 0.9667 | 1.0105 | 0.2988 | 0.0138  | 0.0303 | 0.6629 | 9.0619  | 0.2482 | -1138.4691 |
| log_s_Acidaminococcus_intestini  | Stroke              | Simple mode               | 9 | 0.9829 | 0.9403 | 1.0275 | 0.4683 | 0.0138  | 0.0303 | 0.6629 | 9.0619  | 0.2482 | -1138.4691 |
| log_s_Acidaminococcus_intestini  | Stroke              | Weighted mode             | 9 | 0.9829 | 0.9436 | 1.0239 | 0.4323 | 0.0138  | 0.0303 | 0.6629 | 9.0619  | 0.2482 | -1138.4691 |
| log_s_Acinetobacter_haemolyticus | CardioEmbolicStroke | MR Egger                  | 4 | 0.9932 | 0.1471 | 6.7046 | 0.9951 | -0.0098 | 0.3594 | 0.9808 | 2.4338  | 0.2961 | 444.5297   |
| log_s_Acinetobacter_haemolyticus | CardioEmbolicStroke | Weighted median           | 4 | 0.9573 | 0.8144 | 1.1254 | 0.5971 | -0.0098 | 0.3594 | 0.9808 | 2.4338  | 0.2961 | 444.5297   |
| log_s_Acinetobacter_haemolyticus | CardioEmbolicStroke | Inverse variance weighted | 4 | 0.9674 | 0.8382 | 1.1165 | 0.6502 | -0.0098 | 0.3594 | 0.9808 | 2.4338  | 0.2961 | 444.5297   |
| log_s_Acinetobacter_haemolyticus | CardioEmbolicStroke | Simple mode               | 4 | 0.8922 | 0.6786 | 1.1731 | 0.4739 | -0.0098 | 0.3594 | 0.9808 | 2.4338  | 0.2961 | 444.5297   |
| log_s_Acinetobacter_haemolyticus | CardioEmbolicStroke | Weighted mode             | 4 | 0.8893 | 0.6870 | 1.1512 | 0.4387 | -0.0098 | 0.3594 | 0.9808 | 2.4338  | 0.2961 | 444.5297   |
| log_s_Acinetobacter_haemolyticus | IschemicStroke      | MR Egger                  | 5 | 0.9479 | 0.8728 | 1.0296 | 0.2940 | 0.0264  | 0.0176 | 0.2303 | 3.7509  | 0.4408 | -1216.1422 |
| log_s_Acinetobacter_haemolyticus | IschemicStroke      | Weighted median           | 5 | 1.0015 | 0.9649 | 1.0396 | 0.9364 | 0.0264  | 0.0176 | 0.2303 | 3.7509  | 0.4408 | -1216.1422 |
| log_s_Acinetobacter_haemolyticus | IschemicStroke      | Inverse variance weighted | 5 | 1.0059 | 0.9774 | 1.0351 | 0.6892 | 0.0264  | 0.0176 | 0.2303 | 3.7509  | 0.4408 | -1216.1422 |
| log_s_Acinetobacter_haemolyticus | IschemicStroke      | Simple mode               | 5 | 1.0031 | 0.9505 | 1.0586 | 0.9164 | 0.0264  | 0.0176 | 0.2303 | 3.7509  | 0.4408 | -1216.1422 |
| log_s_Acinetobacter_haemolyticus | IschemicStroke      | Weighted mode             | 5 | 0.9995 | 0.9490 | 1.0527 | 0.9865 | 0.0264  | 0.0176 | 0.2303 | 3.7509  | 0.4408 | -1216.1422 |
| log_s_Acinetobacter_haemolyticus | LargeArteryStroke   | MR Egger                  | 5 | 1.0694 | 0.8205 | 1.3937 | 0.6536 | -0.0213 | 0.0566 | 0.7321 | 2.0961  | 0.5527 | -543.7707  |
| log_s_Acinetobacter_haemolyticus | LargeArteryStroke   | Weighted median           | 5 | 1.0092 | 0.9003 | 1.1313 | 0.8749 | -0.0213 | 0.0566 | 0.7321 | 2.0961  | 0.5527 | -543.7707  |
| log_s_Acinetobacter_haemolyticus | LargeArteryStroke   | Inverse variance weighted | 5 | 1.0197 | 0.9294 | 1.1189 | 0.6797 | -0.0213 | 0.0566 | 0.7321 | 2.0961  | 0.5527 | -543.7707  |
| log_s_Acinetobacter_haemolyticus | LargeArteryStroke   | Simple mode               | 5 | 1.0135 | 0.8681 | 1.1834 | 0.8731 | -0.0213 | 0.0566 | 0.7321 | 2.0961  | 0.5527 | -543.7707  |
| log_s_Acinetobacter_haemolyticus | LargeArteryStroke   | Weighted mode             | 5 | 1.0150 | 0.8802 | 1.1704 | 0.8477 | -0.0213 | 0.0566 | 0.7321 | 2.0961  | 0.5527 | -543.7707  |
| log_s_Acinetobacter_haemolyticus | SmallVesselStroke   | MR Egger                  | 5 | 0.9332 | 0.8037 | 1.0836 | 0.4316 | 0.0265  | 0.0318 | 0.4658 | 2.0612  | 0.5598 | -850.1439  |
| log_s_Acinetobacter_haemolyticus | SmallVesselStroke   | Weighted median           | 5 | 0.9805 | 0.9153 | 1.0505 | 0.5759 | 0.0265  | 0.0318 | 0.4658 | 2.0612  | 0.5598 | -850.1439  |
| log_s_Acinetobacter_haemolyticus | SmallVesselStroke   | Inverse variance weighted | 5 | 0.9905 | 0.9406 | 1.0432 | 0.7191 | 0.0265  | 0.0318 | 0.4658 | 2.0612  | 0.5598 | -850.1439  |
| log_s_Acinetobacter_haemolyticus | SmallVesselStroke   | Simple mode               | 5 | 0.9811 | 0.8928 | 1.0780 | 0.7112 | 0.0265  | 0.0318 | 0.4658 | 2.0612  | 0.5598 | -850.1439  |
| log_s_Acinetobacter_haemolyticus | SmallVesselStroke   | Weighted mode             | 5 | 0.9763 | 0.8925 | 1.0679 | 0.6277 | 0.0265  | 0.0318 | 0.4658 | 2.0612  | 0.5598 | -850.1439  |
| log_s_Acinetobacter_haemolyticus | Stroke              | MR Egger                  | 5 | 0.9577 | 0.8956 | 1.0242 | 0.2965 | 0.0242  | 0.0145 | 0.1927 | 4.6497  | 0.3252 | -1570.6371 |
| log_s_Acinetobacter_haemolyticus | Stroke              | Weighted median           | 5 | 1.0089 | 0.9778 | 1.0410 | 0.5799 | 0.0242  | 0.0145 | 0.1927 | 4.6497  | 0.3252 | -1570.6371 |
| log_s_Acinetobacter_haemolyticus | Stroke              | Inverse variance weighted | 5 | 1.0104 | 0.9844 | 1.0370 | 0.4386 | 0.0242  | 0.0145 | 0.1927 | 4.6497  | 0.3252 | -1570.6371 |
| log_s_Acinetobacter_haemolyticus | Stroke              | Simple mode               | 5 | 1.0154 | 0.9672 | 1.0659 | 0.5711 | 0.0242  | 0.0145 | 0.1927 | 4.6497  | 0.3252 | -1570.6371 |
| log_s_Acinetobacter_haemolyticus | Stroke              | Weighted mode             | 5 | 0.9916 | 0.9457 | 1.0398 | 0.7454 | 0.0242  | 0.0145 | 0.1927 | 4.6497  | 0.3252 | -1570.6371 |

|                                   |                     |                           |    |        |        |        |        |         |        |        |         |        |           |
|-----------------------------------|---------------------|---------------------------|----|--------|--------|--------|--------|---------|--------|--------|---------|--------|-----------|
| log_s_Aggregatibacter_aphrophilus | CardioEmbolicStroke | MR Egger                  | 9  | 1.1798 | 0.6190 | 2.2487 | 0.6308 | -0.0636 | 0.1510 | 0.6864 | 3.4586  | 0.8396 | -327.4988 |
| log_s_Aggregatibacter_aphrophilus | CardioEmbolicStroke | Weighted median           | 9  | 0.9922 | 0.8885 | 1.1080 | 0.8896 | -0.0636 | 0.1510 | 0.6864 | 3.4586  | 0.8396 | -327.4988 |
| log_s_Aggregatibacter_aphrophilus | CardioEmbolicStroke | Inverse variance weighted | 9  | 1.0284 | 0.9438 | 1.1205 | 0.5225 | -0.0636 | 0.1510 | 0.6864 | 3.4586  | 0.8396 | -327.4988 |
| log_s_Aggregatibacter_aphrophilus | CardioEmbolicStroke | Simple mode               | 9  | 0.9858 | 0.8304 | 1.1703 | 0.8739 | -0.0636 | 0.1510 | 0.6864 | 3.4586  | 0.8396 | -327.4988 |
| log_s_Aggregatibacter_aphrophilus | CardioEmbolicStroke | Weighted mode             | 9  | 0.9834 | 0.8367 | 1.1559 | 0.8445 | -0.0636 | 0.1510 | 0.6864 | 3.4586  | 0.8396 | -327.4988 |
| log_s_Aggregatibacter_aphrophilus | IschemicStroke      | MR Egger                  | 12 | 1.0018 | 0.9326 | 1.0761 | 0.9615 | -0.0004 | 0.0181 | 0.9825 | 8.6013  | 0.5703 | -126.9067 |
| log_s_Aggregatibacter_aphrophilus | IschemicStroke      | Weighted median           | 12 | 1.0045 | 0.9815 | 1.0280 | 0.7049 | -0.0004 | 0.0181 | 0.9825 | 8.6013  | 0.5703 | -126.9067 |
| log_s_Aggregatibacter_aphrophilus | IschemicStroke      | Inverse variance weighted | 12 | 1.0010 | 0.9832 | 1.0191 | 0.9119 | -0.0004 | 0.0181 | 0.9825 | 8.6013  | 0.5703 | -126.9067 |
| log_s_Aggregatibacter_aphrophilus | IschemicStroke      | Simple mode               | 12 | 1.0091 | 0.9744 | 1.0450 | 0.6219 | -0.0004 | 0.0181 | 0.9825 | 8.6013  | 0.5703 | -126.9067 |
| log_s_Aggregatibacter_aphrophilus | IschemicStroke      | Weighted mode             | 12 | 1.0099 | 0.9762 | 1.0448 | 0.5810 | -0.0004 | 0.0181 | 0.9825 | 8.6013  | 0.5703 | -126.9067 |
| log_s_Aggregatibacter_aphrophilus | LargeArteryStroke   | MR Egger                  | 10 | 0.7869 | 0.5506 | 1.1245 | 0.2246 | 0.0950  | 0.0853 | 0.2977 | 3.2532  | 0.9534 | -122.8243 |
| log_s_Aggregatibacter_aphrophilus | LargeArteryStroke   | Weighted median           | 10 | 0.9568 | 0.8841 | 1.0354 | 0.2727 | 0.0950  | 0.0853 | 0.2977 | 3.2532  | 0.9534 | -122.8243 |
| log_s_Aggregatibacter_aphrophilus | LargeArteryStroke   | Inverse variance weighted | 10 | 0.9608 | 0.9027 | 1.0227 | 0.2095 | 0.0950  | 0.0853 | 0.2977 | 3.2532  | 0.9534 | -122.8243 |
| log_s_Aggregatibacter_aphrophilus | LargeArteryStroke   | Simple mode               | 10 | 0.9591 | 0.8489 | 1.0836 | 0.5191 | 0.0950  | 0.0853 | 0.2977 | 3.2532  | 0.9534 | -122.8243 |
| log_s_Aggregatibacter_aphrophilus | LargeArteryStroke   | Weighted mode             | 10 | 0.9569 | 0.8490 | 1.0786 | 0.4894 | 0.0950  | 0.0853 | 0.2977 | 3.2532  | 0.9534 | -122.8243 |
| log_s_Aggregatibacter_aphrophilus | SmallVesselStroke   | MR Egger                  | 10 | 0.9245 | 0.7593 | 1.1256 | 0.4570 | 0.0365  | 0.0471 | 0.4600 | 5.0803  | 0.7490 | -207.9397 |
| log_s_Aggregatibacter_aphrophilus | SmallVesselStroke   | Weighted median           | 10 | 1.0127 | 0.9687 | 1.0587 | 0.5776 | 0.0365  | 0.0471 | 0.4600 | 5.0803  | 0.7490 | -207.9397 |
| log_s_Aggregatibacter_aphrophilus | SmallVesselStroke   | Inverse variance weighted | 10 | 0.9983 | 0.9642 | 1.0335 | 0.9213 | 0.0365  | 0.0471 | 0.4600 | 5.0803  | 0.7490 | -207.9397 |
| log_s_Aggregatibacter_aphrophilus | SmallVesselStroke   | Simple mode               | 10 | 1.0156 | 0.9487 | 1.0871 | 0.6671 | 0.0365  | 0.0471 | 0.4600 | 5.0803  | 0.7490 | -207.9397 |
| log_s_Aggregatibacter_aphrophilus | SmallVesselStroke   | Weighted mode             | 10 | 1.0165 | 0.9543 | 1.0827 | 0.6237 | 0.0365  | 0.0471 | 0.4600 | 5.0803  | 0.7490 | -207.9397 |
| log_s_Aggregatibacter_aphrophilus | Stroke              | MR Egger                  | 13 | 1.0121 | 0.9552 | 1.0724 | 0.6908 | -0.0011 | 0.0146 | 0.9431 | 5.7523  | 0.8894 | -167.9321 |
| log_s_Aggregatibacter_aphrophilus | Stroke              | Weighted median           | 13 | 1.0124 | 0.9923 | 1.0329 | 0.2284 | -0.0011 | 0.0146 | 0.9431 | 5.7523  | 0.8894 | -167.9321 |
| log_s_Aggregatibacter_aphrophilus | Stroke              | Inverse variance weighted | 13 | 1.0100 | 0.9950 | 1.0253 | 0.1927 | -0.0011 | 0.0146 | 0.9431 | 5.7523  | 0.8894 | -167.9321 |
| log_s_Aggregatibacter_aphrophilus | Stroke              | Simple mode               | 13 | 1.0164 | 0.9846 | 1.0493 | 0.3358 | -0.0011 | 0.0146 | 0.9431 | 5.7523  | 0.8894 | -167.9321 |
| log_s_Aggregatibacter_aphrophilus | Stroke              | Weighted mode             | 13 | 1.0167 | 0.9863 | 1.0480 | 0.3060 | -0.0011 | 0.0146 | 0.9431 | 5.7523  | 0.8894 | -167.9321 |
| log_s_Bifidobacterium_angulatum   | CardioEmbolicStroke | MR Egger                  | 7  | 0.6187 | 0.2483 | 1.5415 | 0.3499 | 0.1739  | 0.1879 | 0.3970 | 10.5156 | 0.1046 | -166.3569 |
| log_s_Bifidobacterium_angulatum   | CardioEmbolicStroke | Weighted median           | 7  | 0.9915 | 0.8664 | 1.1347 | 0.9018 | 0.1739  | 0.1879 | 0.3970 | 10.5156 | 0.1046 | -166.3569 |
| log_s_Bifidobacterium_angulatum   | CardioEmbolicStroke | Inverse variance weighted | 7  | 0.9471 | 0.8216 | 1.0919 | 0.4540 | 0.1739  | 0.1879 | 0.3970 | 10.5156 | 0.1046 | -166.3569 |
| log_s_Bifidobacterium_angulatum   | CardioEmbolicStroke | Simple mode               | 7  | 0.9984 | 0.8413 | 1.1848 | 0.9860 | 0.1739  | 0.1879 | 0.3970 | 10.5156 | 0.1046 | -166.3569 |
| log_s_Bifidobacterium_angulatum   | CardioEmbolicStroke | Weighted mode             | 7  | 0.9901 | 0.8536 | 1.1484 | 0.8998 | 0.1739  | 0.1879 | 0.3970 | 10.5156 | 0.1046 | -166.3569 |
| log_s_Bifidobacterium_angulatum   | IschemicStroke      | MR Egger                  | 9  | 1.0158 | 0.9489 | 1.0873 | 0.6661 | -0.0054 | 0.0156 | 0.7379 | 1.3793  | 0.9862 | -823.3826 |
| log_s_Bifidobacterium_angulatum   | IschemicStroke      | Weighted median           | 9  | 1.0048 | 0.9786 | 1.0316 | 0.7240 | -0.0054 | 0.0156 | 0.7379 | 1.3793  | 0.9862 | -823.3826 |
| log_s_Bifidobacterium_angulatum   | IschemicStroke      | Inverse variance weighted | 9  | 1.0042 | 0.9828 | 1.0260 | 0.7043 | -0.0054 | 0.0156 | 0.7379 | 1.3793  | 0.9862 | -823.3826 |
| log_s_Bifidobacterium_angulatum   | IschemicStroke      | Simple mode               | 9  | 1.0082 | 0.9674 | 1.0506 | 0.7086 | -0.0054 | 0.0156 | 0.7379 | 1.3793  | 0.9862 | -823.3826 |
| log_s_Bifidobacterium_angulatum   | IschemicStroke      | Weighted mode             | 9  | 1.0071 | 0.9694 | 1.0462 | 0.7270 | -0.0054 | 0.0156 | 0.7379 | 1.3793  | 0.9862 | -823.3826 |
| log_s_Bifidobacterium_angulatum   | LargeArteryStroke   | MR Egger                  | 9  | 0.8293 | 0.6633 | 1.0369 | 0.1445 | 0.0892  | 0.0511 | 0.1242 | 5.7523  | 0.6750 | -59.0639  |
| log_s_Bifidobacterium_angulatum   | LargeArteryStroke   | Weighted median           | 9  | 1.0005 | 0.9132 | 1.0961 | 0.9916 | 0.0892  | 0.0511 | 0.1242 | 5.7523  | 0.6750 | -59.0639  |
| log_s_Bifidobacterium_angulatum   | LargeArteryStroke   | Inverse variance weighted | 9  | 1.0018 | 0.9340 | 1.0746 | 0.9599 | 0.0892  | 0.0511 | 0.1242 | 5.7523  | 0.6750 | -59.0639  |
| log_s_Bifidobacterium_angulatum   | LargeArteryStroke   | Simple mode               | 9  | 1.0323 | 0.8960 | 1.1894 | 0.6714 | 0.0892  | 0.0511 | 0.1242 | 5.7523  | 0.6750 | -59.0639  |
| log_s_Bifidobacterium_angulatum   | LargeArteryStroke   | Weighted mode             | 9  | 1.0247 | 0.8907 | 1.1789 | 0.7418 | 0.0892  | 0.0511 | 0.1242 | 5.7523  | 0.6750 | -59.0639  |
| log_s_Bifidobacterium_angulatum   | SmallVesselStroke   | MR Egger                  | 9  | 1.0154 | 0.8609 | 1.1975 | 0.8615 | -0.0027 | 0.0378 | 0.9458 | 12.4478 | 0.0868 | -145.9222 |
| log_s_Bifidobacterium_angulatum   | SmallVesselStroke   | Weighted median           | 9  | 1.0209 | 0.9689 | 1.0757 | 0.4389 | -0.0027 | 0.0378 | 0.9458 | 12.4478 | 0.0868 | -145.9222 |
| log_s_Bifidobacterium_angulatum   | SmallVesselStroke   | Inverse variance weighted | 9  | 1.0097 | 0.9618 | 1.0599 | 0.6981 | -0.0027 | 0.0378 | 0.9458 | 12.4478 | 0.0868 | -145.9222 |
| log_s_Bifidobacterium_angulatum   | SmallVesselStroke   | Simple mode               | 9  | 1.0351 | 0.9556 | 1.1212 | 0.4224 | -0.0027 | 0.0378 | 0.9458 | 12.4478 | 0.0868 | -145.9222 |
| log_s_Bifidobacterium_angulatum   | SmallVesselStroke   | Weighted mode             | 9  | 1.0304 | 0.9603 | 1.1055 | 0.4289 | -0.0027 | 0.0378 | 0.9458 | 12.4478 | 0.0868 | -145.9222 |
| log_s_Bifidobacterium_angulatum   | Stroke              | MR Egger                  | 9  | 1.0408 | 0.9821 | 1.1031 | 0.2191 | -0.0190 | 0.0134 | 0.1999 | 4.4598  | 0.8134 | -498.2992 |
| log_s_Bifidobacterium_angulatum   | Stroke              | Weighted median           | 9  | 1.0000 | 0.9753 | 1.0254 | 0.9973 | -0.0190 | 0.0134 | 0.1999 | 4.4598  | 0.8134 | -498.2992 |
| log_s_Bifidobacterium_angulatum   | Stroke              | Inverse variance weighted | 9  | 1.0002 | 0.9819 | 1.0189 | 0.9801 | -0.0190 | 0.0134 | 0.1999 | 4.4598  | 0.8134 | -498.2992 |
| log_s_Bifidobacterium_angulatum   | Stroke              | Simple mode               | 9  | 1.0117 | 0.9704 | 1.0548 | 0.5988 | -0.0190 | 0.0134 | 0.1999 | 4.4598  | 0.8134 | -498.2992 |
| log_s_Bifidobacterium_angulatum   | Stroke              | Weighted mode             | 9  | 0.9833 | 0.9443 | 1.0240 | 0.4393 | -0.0190 | 0.0134 | 0.1999 | 4.4598  | 0.8134 | -498.2992 |
| log_s_Bifidobacterium_dentium     | CardioEmbolicStroke | MR Egger                  | 6  | 1.0684 | 0.8444 | 1.3519 | 0.6109 | -0.0717 | 0.0621 | 0.3123 | 2.3545  | 0.7982 | -155.6622 |
| log_s_Bifidobacterium_dentium     | CardioEmbolicStroke | Weighted median           | 6  | 0.9196 | 0.8188 | 1.0328 | 0.1569 | -0.0717 | 0.0621 | 0.3123 | 2.3545  | 0.7982 | -155.6622 |
| log_s_Bifidobacterium_dentium     | CardioEmbolicStroke | Inverse variance weighted | 6  | 0.9409 | 0.8562 | 1.0340 | 0.2057 | -0.0717 | 0.0621 | 0.3123 | 2.3545  | 0.7982 | -155.6622 |

|                                |                     |                           |   |        |        |         |        |         |        |        |         |        |            |
|--------------------------------|---------------------|---------------------------|---|--------|--------|---------|--------|---------|--------|--------|---------|--------|------------|
| log_s_Bifidobacterium_dentium  | CardioEmbolicStroke | Simple mode               | 6 | 0.9159 | 0.7612 | 1.1021  | 0.3950 | -0.0717 | 0.0621 | 0.3123 | 2.3545  | 0.7982 | -155.6622  |
| log_s_Bifidobacterium_dentium  | CardioEmbolicStroke | Weighted mode             | 6 | 0.9149 | 0.7750 | 1.0800  | 0.3413 | -0.0717 | 0.0621 | 0.3123 | 2.3545  | 0.7982 | -155.6622  |
| log_s_Bifidobacterium_dentium  | IschemicStroke      | MR Egger                  | 7 | 1.0268 | 0.9759 | 1.0804  | 0.3545 | -0.0134 | 0.0137 | 0.3715 | 4.5089  | 0.6082 | -234.1651  |
| log_s_Bifidobacterium_dentium  | IschemicStroke      | Weighted median           | 7 | 1.0069 | 0.9798 | 1.0347  | 0.6231 | -0.0134 | 0.0137 | 0.3715 | 4.5089  | 0.6082 | -234.1651  |
| log_s_Bifidobacterium_dentium  | IschemicStroke      | Inverse variance weighted | 7 | 1.0033 | 0.9824 | 1.0247  | 0.7590 | -0.0134 | 0.0137 | 0.3715 | 4.5089  | 0.6082 | -234.1651  |
| log_s_Bifidobacterium_dentium  | IschemicStroke      | Simple mode               | 7 | 1.0104 | 0.9683 | 1.0544  | 0.6501 | -0.0134 | 0.0137 | 0.3715 | 4.5089  | 0.6082 | -234.1651  |
| log_s_Bifidobacterium_dentium  | IschemicStroke      | Weighted mode             | 7 | 1.0141 | 0.9788 | 1.0507  | 0.4675 | -0.0134 | 0.0137 | 0.3715 | 4.5089  | 0.6082 | -234.1651  |
| log_s_Bifidobacterium_dentium  | LargeArteryStroke   | MR Egger                  | 6 | 0.9940 | 0.8350 | 1.1833  | 0.9492 | 0.0218  | 0.0461 | 0.6617 | 3.6034  | 0.4623 | -241.7855  |
| log_s_Bifidobacterium_dentium  | LargeArteryStroke   | Weighted median           | 6 | 1.0434 | 0.9545 | 1.1406  | 0.3495 | 0.0218  | 0.0461 | 0.6617 | 3.6034  | 0.4623 | -241.7855  |
| log_s_Bifidobacterium_dentium  | LargeArteryStroke   | Inverse variance weighted | 6 | 1.0329 | 0.9629 | 1.1080  | 0.3663 | 0.0218  | 0.0461 | 0.6617 | 3.6034  | 0.4623 | -241.7855  |
| log_s_Bifidobacterium_dentium  | LargeArteryStroke   | Simple mode               | 6 | 1.0791 | 0.9353 | 1.2450  | 0.3445 | 0.0218  | 0.0461 | 0.6617 | 3.6034  | 0.4623 | -241.7855  |
| log_s_Bifidobacterium_dentium  | LargeArteryStroke   | Weighted mode             | 6 | 1.0482 | 0.9295 | 1.1821  | 0.4776 | 0.0218  | 0.0461 | 0.6617 | 3.6034  | 0.4623 | -241.7855  |
| log_s_Bifidobacterium_dentium  | SmallVesselStroke   | MR Egger                  | 6 | 1.0230 | 0.9290 | 1.1264  | 0.6682 | -0.0097 | 0.0255 | 0.7223 | 2.4989  | 0.6448 | -596.1307  |
| log_s_Bifidobacterium_dentium  | SmallVesselStroke   | Weighted median           | 6 | 1.0158 | 0.9692 | 1.0648  | 0.5124 | -0.0097 | 0.0255 | 0.7223 | 2.4989  | 0.6448 | -596.1307  |
| log_s_Bifidobacterium_dentium  | SmallVesselStroke   | Inverse variance weighted | 6 | 1.0056 | 0.9673 | 1.0453  | 0.7796 | -0.0097 | 0.0255 | 0.7223 | 2.4989  | 0.6448 | -596.1307  |
| log_s_Bifidobacterium_dentium  | SmallVesselStroke   | Simple mode               | 6 | 1.0038 | 0.9369 | 1.0755  | 0.9179 | -0.0097 | 0.0255 | 0.7223 | 2.4989  | 0.6448 | -596.1307  |
| log_s_Bifidobacterium_dentium  | SmallVesselStroke   | Weighted mode             | 6 | 1.0115 | 0.9519 | 1.0747  | 0.7278 | -0.0097 | 0.0255 | 0.7223 | 2.4989  | 0.6448 | -596.1307  |
| log_s_Bifidobacterium_dentium  | Stroke              | MR Egger                  | 8 | 1.0079 | 0.9637 | 1.0541  | 0.7422 | -0.0070 | 0.0119 | 0.5786 | 4.4929  | 0.6103 | -304.4779  |
| log_s_Bifidobacterium_dentium  | Stroke              | Weighted median           | 8 | 1.0038 | 0.9800 | 1.0282  | 0.7573 | -0.0070 | 0.0119 | 0.5786 | 4.4929  | 0.6103 | -304.4779  |
| log_s_Bifidobacterium_dentium  | Stroke              | Inverse variance weighted | 8 | 0.9956 | 0.9779 | 1.0136  | 0.6298 | -0.0070 | 0.0119 | 0.5786 | 4.4929  | 0.6103 | -304.4779  |
| log_s_Bifidobacterium_dentium  | Stroke              | Simple mode               | 8 | 0.9872 | 0.9544 | 1.0211  | 0.4794 | -0.0070 | 0.0119 | 0.5786 | 4.4929  | 0.6103 | -304.4779  |
| log_s_Bifidobacterium_dentium  | Stroke              | Weighted mode             | 8 | 1.0026 | 0.9750 | 1.0310  | 0.8600 | -0.0070 | 0.0119 | 0.5786 | 4.4929  | 0.6103 | -304.4779  |
| log_s_Brucella_melitensis      | CardioEmbolicStroke | MR Egger                  | 8 | 1.5601 | 0.8575 | 2.8385  | 0.1955 | -0.2291 | 0.1342 | 0.1388 | 7.2141  | 0.4069 | -296.8732  |
| log_s_Brucella_melitensis      | CardioEmbolicStroke | Weighted median           | 8 | 0.9373 | 0.8215 | 1.0694  | 0.3359 | -0.2291 | 0.1342 | 0.1388 | 7.2141  | 0.4069 | -296.8732  |
| log_s_Brucella_melitensis      | CardioEmbolicStroke | Inverse variance weighted | 8 | 0.9329 | 0.8451 | 1.0297  | 0.1679 | -0.2291 | 0.1342 | 0.1388 | 7.2141  | 0.4069 | -296.8732  |
| log_s_Brucella_melitensis      | CardioEmbolicStroke | Simple mode               | 8 | 1.0189 | 0.8202 | 1.2658  | 0.8703 | -0.2291 | 0.1342 | 0.1388 | 7.2141  | 0.4069 | -296.8732  |
| log_s_Brucella_melitensis      | CardioEmbolicStroke | Weighted mode             | 8 | 0.9797 | 0.8057 | 1.1912  | 0.8428 | -0.2291 | 0.1342 | 0.1388 | 7.2141  | 0.4069 | -296.8732  |
| log_s_Brucella_melitensis      | IschemicStroke      | MR Egger                  | 8 | 1.0973 | 0.9565 | 1.2588  | 0.2332 | -0.0387 | 0.0308 | 0.2559 | 6.8166  | 0.4482 | -1984.7804 |
| log_s_Brucella_melitensis      | IschemicStroke      | Weighted median           | 8 | 1.0103 | 0.9796 | 1.0419  | 0.5163 | -0.0387 | 0.0308 | 0.2559 | 6.8166  | 0.4482 | -1984.7804 |
| log_s_Brucella_melitensis      | IschemicStroke      | Inverse variance weighted | 8 | 1.0061 | 0.9838 | 1.0289  | 0.5962 | -0.0387 | 0.0308 | 0.2559 | 6.8166  | 0.4482 | -1984.7804 |
| log_s_Brucella_melitensis      | IschemicStroke      | Simple mode               | 8 | 1.0125 | 0.9629 | 1.0645  | 0.6429 | -0.0387 | 0.0308 | 0.2559 | 6.8166  | 0.4482 | -1984.7804 |
| log_s_Brucella_melitensis      | IschemicStroke      | Weighted mode             | 8 | 1.0146 | 0.9665 | 1.0651  | 0.5780 | -0.0387 | 0.0308 | 0.2559 | 6.8166  | 0.4482 | -1984.7804 |
| log_s_Brucella_melitensis      | LargeArteryStroke   | MR Egger                  | 8 | 0.9432 | 0.5102 | 1.7435  | 0.8581 | 0.0377  | 0.1378 | 0.7937 | 11.4619 | 0.0751 | -239.4679  |
| log_s_Brucella_melitensis      | LargeArteryStroke   | Weighted median           | 8 | 1.0475 | 0.9543 | 1.1499  | 0.3291 | 0.0377  | 0.1378 | 0.7937 | 11.4619 | 0.0751 | -239.4679  |
| log_s_Brucella_melitensis      | LargeArteryStroke   | Inverse variance weighted | 8 | 1.0264 | 0.9345 | 1.1272  | 0.5862 | 0.0377  | 0.1378 | 0.7937 | 11.4619 | 0.0751 | -239.4679  |
| log_s_Brucella_melitensis      | LargeArteryStroke   | Simple mode               | 8 | 1.0460 | 0.9251 | 1.1826  | 0.4961 | 0.0377  | 0.1378 | 0.7937 | 11.4619 | 0.0751 | -239.4679  |
| log_s_Brucella_melitensis      | LargeArteryStroke   | Weighted mode             | 8 | 1.0473 | 0.9371 | 1.1704  | 0.4421 | 0.0377  | 0.1378 | 0.7937 | 11.4619 | 0.0751 | -239.4679  |
| log_s_Brucella_melitensis      | SmallVesselStroke   | MR Egger                  | 8 | 1.1353 | 0.8875 | 1.4523  | 0.3515 | -0.0527 | 0.0553 | 0.3775 | 4.2327  | 0.7526 | -1405.5640 |
| log_s_Brucella_melitensis      | SmallVesselStroke   | Weighted median           | 8 | 0.9948 | 0.9436 | 1.0487  | 0.8452 | -0.0527 | 0.0553 | 0.3775 | 4.2327  | 0.7526 | -1405.5640 |
| log_s_Brucella_melitensis      | SmallVesselStroke   | Inverse variance weighted | 8 | 1.0088 | 0.9690 | 1.0503  | 0.6690 | -0.0527 | 0.0553 | 0.3775 | 4.2327  | 0.7526 | -1405.5640 |
| log_s_Brucella_melitensis      | SmallVesselStroke   | Simple mode               | 8 | 0.9767 | 0.9009 | 1.0588  | 0.5846 | -0.0527 | 0.0553 | 0.3775 | 4.2327  | 0.7526 | -1405.5640 |
| log_s_Brucella_melitensis      | SmallVesselStroke   | Weighted mode             | 8 | 0.9786 | 0.9010 | 1.0629  | 0.6240 | -0.0527 | 0.0553 | 0.3775 | 4.2327  | 0.7526 | -1405.5640 |
| log_s_Brucella_melitensis      | Stroke              | MR Egger                  | 8 | 1.0781 | 0.9578 | 1.2135  | 0.2594 | -0.0339 | 0.0265 | 0.2481 | 6.6255  | 0.4689 | -2705.2205 |
| log_s_Brucella_melitensis      | Stroke              | Weighted median           | 8 | 1.0030 | 0.9773 | 1.0294  | 0.8213 | -0.0339 | 0.0265 | 0.2481 | 6.6255  | 0.4689 | -2705.2205 |
| log_s_Brucella_melitensis      | Stroke              | Inverse variance weighted | 8 | 0.9990 | 0.9801 | 1.0182  | 0.9154 | -0.0339 | 0.0265 | 0.2481 | 6.6255  | 0.4689 | -2705.2205 |
| log_s_Brucella_melitensis      | Stroke              | Simple mode               | 8 | 1.0118 | 0.9662 | 1.0596  | 0.6329 | -0.0339 | 0.0265 | 0.2481 | 6.6255  | 0.4689 | -2705.2205 |
| log_s_Brucella_melitensis      | Stroke              | Weighted mode             | 8 | 1.0145 | 0.9716 | 1.0592  | 0.5350 | -0.0339 | 0.0265 | 0.2481 | 6.6255  | 0.4689 | -2705.2205 |
| log_s_Burkholderia_multivorans | CardioEmbolicStroke | MR Egger                  | 3 | 2.4058 | 0.2191 | 26.4132 | 0.6035 | -0.3522 | 0.4643 | 0.5869 | 1.5724  | 0.2099 | 267.4401   |
| log_s_Burkholderia_multivorans | CardioEmbolicStroke | Weighted median           | 3 | 1.0120 | 0.8106 | 1.2633  | 0.9163 | -0.3522 | 0.4643 | 0.5869 | 1.5724  | 0.2099 | 267.4401   |
| log_s_Burkholderia_multivorans | CardioEmbolicStroke | Inverse variance weighted | 3 | 0.9556 | 0.7853 | 1.1629  | 0.6502 | -0.3522 | 0.4643 | 0.5869 | 1.5724  | 0.2099 | 267.4401   |
| log_s_Burkholderia_multivorans | CardioEmbolicStroke | Simple mode               | 3 | 1.0730 | 0.7931 | 1.4515  | 0.6926 | -0.3522 | 0.4643 | 0.5869 | 1.5724  | 0.2099 | 267.4401   |
| log_s_Burkholderia_multivorans | CardioEmbolicStroke | Weighted mode             | 3 | 1.0715 | 0.7766 | 1.4783  | 0.7150 | -0.3522 | 0.4643 | 0.5869 | 1.5724  | 0.2099 | 267.4401   |
| log_s_Burkholderia_multivorans | IschemicStroke      | MR Egger                  | 3 | 1.2224 | 0.7765 | 1.9244  | 0.5452 | -0.0858 | 0.0878 | 0.5071 | 1.1499  | 0.5627 | 1562.9805  |

|                                |                     |                           |    |        |        |        |        |         |        |        |         |        |           |
|--------------------------------|---------------------|---------------------------|----|--------|--------|--------|--------|---------|--------|--------|---------|--------|-----------|
| log_s_Burkholderia_multivorans | IschemicStroke      | Weighted median           | 3  | 0.9679 | 0.9185 | 1.0199 | 0.2219 | -0.0858 | 0.0878 | 0.5071 | 1.1499  | 0.5627 | 1562.9805 |
| log_s_Burkholderia_multivorans | IschemicStroke      | Inverse variance weighted | 3  | 0.9756 | 0.9362 | 1.0166 | 0.2396 | -0.0858 | 0.0878 | 0.5071 | 1.1499  | 0.5627 | 1562.9805 |
| log_s_Burkholderia_multivorans | IschemicStroke      | Simple mode               | 3  | 0.9646 | 0.9096 | 1.0229 | 0.3522 | -0.0858 | 0.0878 | 0.5071 | 1.1499  | 0.5627 | 1562.9805 |
| log_s_Burkholderia_multivorans | IschemicStroke      | Weighted mode             | 3  | 0.9649 | 0.9138 | 1.0188 | 0.3261 | -0.0858 | 0.0878 | 0.5071 | 1.1499  | 0.5627 | 1562.9805 |
| log_s_Burkholderia_multivorans | LargeArteryStroke   | MR Egger                  | 3  | 0.4569 | 0.1077 | 1.9375 | 0.4806 | 0.2969  | 0.2798 | 0.4810 | 1.2173  | 0.5441 | 399.3071  |
| log_s_Burkholderia_multivorans | LargeArteryStroke   | Weighted median           | 3  | 1.0103 | 0.8530 | 1.1966 | 0.9056 | 0.2969  | 0.2798 | 0.4810 | 1.2173  | 0.5441 | 399.3071  |
| log_s_Burkholderia_multivorans | LargeArteryStroke   | Inverse variance weighted | 3  | 0.9957 | 0.8721 | 1.1369 | 0.9498 | 0.2969  | 0.2798 | 0.4810 | 1.2173  | 0.5441 | 399.3071  |
| log_s_Burkholderia_multivorans | LargeArteryStroke   | Simple mode               | 3  | 1.0142 | 0.8390 | 1.2261 | 0.8974 | 0.2969  | 0.2798 | 0.4810 | 1.2173  | 0.5441 | 399.3071  |
| log_s_Burkholderia_multivorans | LargeArteryStroke   | Weighted mode             | 3  | 1.0244 | 0.8535 | 1.2296 | 0.8198 | 0.2969  | 0.2798 | 0.4810 | 1.2173  | 0.5441 | 399.3071  |
| log_s_Burkholderia_multivorans | SmallVesselStroke   | MR Egger                  | 3  | 1.1764 | 0.5210 | 2.6565 | 0.7627 | -0.0633 | 0.1575 | 0.7567 | 0.1682  | 0.9193 | 2604.0071 |
| log_s_Burkholderia_multivorans | SmallVesselStroke   | Weighted median           | 3  | 0.9924 | 0.9117 | 1.0802 | 0.8597 | -0.0633 | 0.1575 | 0.7567 | 0.1682  | 0.9193 | 2604.0071 |
| log_s_Burkholderia_multivorans | SmallVesselStroke   | Inverse variance weighted | 3  | 0.9962 | 0.9251 | 1.0727 | 0.9195 | -0.0633 | 0.1575 | 0.7567 | 0.1682  | 0.9193 | 2604.0071 |
| log_s_Burkholderia_multivorans | SmallVesselStroke   | Simple mode               | 3  | 0.9905 | 0.8981 | 1.0925 | 0.8664 | -0.0633 | 0.1575 | 0.7567 | 0.1682  | 0.9193 | 2604.0071 |
| log_s_Burkholderia_multivorans | SmallVesselStroke   | Weighted mode             | 3  | 0.9895 | 0.8919 | 1.0978 | 0.8609 | -0.0633 | 0.1575 | 0.7567 | 0.1682  | 0.9193 | 2604.0071 |
| log_s_Burkholderia_multivorans | Stroke              | MR Egger                  | 3  | 1.1993 | 0.7716 | 1.8640 | 0.5675 | -0.0776 | 0.0859 | 0.5323 | 1.5320  | 0.2158 | 1416.7811 |
| log_s_Burkholderia_multivorans | Stroke              | Weighted median           | 3  | 0.9818 | 0.9386 | 1.0270 | 0.4235 | -0.0776 | 0.0859 | 0.5323 | 1.5320  | 0.2158 | 1416.7811 |
| log_s_Burkholderia_multivorans | Stroke              | Inverse variance weighted | 3  | 0.9796 | 0.9409 | 1.0199 | 0.3168 | -0.0776 | 0.0859 | 0.5323 | 1.5320  | 0.2158 | 1416.7811 |
| log_s_Burkholderia_multivorans | Stroke              | Simple mode               | 3  | 0.9928 | 0.9356 | 1.0535 | 0.8344 | -0.0776 | 0.0859 | 0.5323 | 1.5320  | 0.2158 | 1416.7811 |
| log_s_Burkholderia_multivorans | Stroke              | Weighted mode             | 3  | 0.9837 | 0.9277 | 1.0431 | 0.6381 | -0.0776 | 0.0859 | 0.5323 | 1.5320  | 0.2158 | 1416.7811 |
| log_s_Campylobacter_conciscus  | CardioEmbolicStroke | MR Egger                  | 5  | 0.9726 | 0.3651 | 2.5907 | 0.9592 | 0.0089  | 0.1932 | 0.9663 | 0.8301  | 0.8423 | 5917.8437 |
| log_s_Campylobacter_conciscus  | CardioEmbolicStroke | Weighted median           | 5  | 0.9814 | 0.8488 | 1.1346 | 0.7994 | 0.0089  | 0.1932 | 0.9663 | 0.8301  | 0.8423 | 5917.8437 |
| log_s_Campylobacter_conciscus  | CardioEmbolicStroke | Inverse variance weighted | 5  | 0.9950 | 0.8816 | 1.1229 | 0.9349 | 0.0089  | 0.1932 | 0.9663 | 0.8301  | 0.8423 | 5917.8437 |
| log_s_Campylobacter_conciscus  | CardioEmbolicStroke | Simple mode               | 5  | 0.9683 | 0.7981 | 1.1748 | 0.7605 | 0.0089  | 0.1932 | 0.9663 | 0.8301  | 0.8423 | 5917.8437 |
| log_s_Campylobacter_conciscus  | CardioEmbolicStroke | Weighted mode             | 5  | 0.9664 | 0.7987 | 1.1694 | 0.7433 | 0.0089  | 0.1932 | 0.9663 | 0.8301  | 0.8423 | 5917.8437 |
| log_s_Campylobacter_conciscus  | IschemicStroke      | MR Egger                  | 7  | 1.0381 | 0.9395 | 1.1470 | 0.4960 | -0.0236 | 0.0217 | 0.3281 | 9.3842  | 0.1531 | -545.6620 |
| log_s_Campylobacter_conciscus  | IschemicStroke      | Weighted median           | 7  | 0.9994 | 0.9651 | 1.0350 | 0.9740 | -0.0236 | 0.0217 | 0.3281 | 9.3842  | 0.1531 | -545.6620 |
| log_s_Campylobacter_conciscus  | IschemicStroke      | Inverse variance weighted | 7  | 0.9850 | 0.9548 | 1.0161 | 0.3409 | -0.0236 | 0.0217 | 0.3281 | 9.3842  | 0.1531 | -545.6620 |
| log_s_Campylobacter_conciscus  | IschemicStroke      | Simple mode               | 7  | 1.0075 | 0.9611 | 1.0561 | 0.7673 | -0.0236 | 0.0217 | 0.3281 | 9.3842  | 0.1531 | -545.6620 |
| log_s_Campylobacter_conciscus  | IschemicStroke      | Weighted mode             | 7  | 1.0096 | 0.9592 | 1.0627 | 0.7269 | -0.0236 | 0.0217 | 0.3281 | 9.3842  | 0.1531 | -545.6620 |
| log_s_Campylobacter_conciscus  | LargeArteryStroke   | MR Egger                  | 6  | 0.9176 | 0.6319 | 1.3326 | 0.6750 | 0.0320  | 0.0771 | 0.6997 | 4.1696  | 0.3835 | -666.2906 |
| log_s_Campylobacter_conciscus  | LargeArteryStroke   | Weighted median           | 6  | 0.9481 | 0.8489 | 1.0588 | 0.3438 | 0.0320  | 0.0771 | 0.6997 | 4.1696  | 0.3835 | -666.2906 |
| log_s_Campylobacter_conciscus  | LargeArteryStroke   | Inverse variance weighted | 6  | 0.9908 | 0.9098 | 1.0792 | 0.8327 | 0.0320  | 0.0771 | 0.6997 | 4.1696  | 0.3835 | -666.2906 |
| log_s_Campylobacter_conciscus  | LargeArteryStroke   | Simple mode               | 6  | 0.9369 | 0.8016 | 1.0950 | 0.4496 | 0.0320  | 0.0771 | 0.6997 | 4.1696  | 0.3835 | -666.2906 |
| log_s_Campylobacter_conciscus  | LargeArteryStroke   | Weighted mode             | 6  | 0.9341 | 0.8037 | 1.0856 | 0.4147 | 0.0320  | 0.0771 | 0.6997 | 4.1696  | 0.3835 | -666.2906 |
| log_s_Campylobacter_conciscus  | SmallVesselStroke   | MR Egger                  | 6  | 0.9674 | 0.7763 | 1.2055 | 0.7825 | -0.0012 | 0.0456 | 0.9807 | 4.8717  | 0.3007 | -447.0422 |
| log_s_Campylobacter_conciscus  | SmallVesselStroke   | Weighted median           | 6  | 0.9769 | 0.9173 | 1.0404 | 0.4669 | -0.0012 | 0.0456 | 0.9807 | 4.8717  | 0.3007 | -447.0422 |
| log_s_Campylobacter_conciscus  | SmallVesselStroke   | Inverse variance weighted | 6  | 0.9647 | 0.9200 | 1.0116 | 0.1376 | -0.0012 | 0.0456 | 0.9807 | 4.8717  | 0.3007 | -447.0422 |
| log_s_Campylobacter_conciscus  | SmallVesselStroke   | Simple mode               | 6  | 0.9231 | 0.8325 | 1.0235 | 0.1893 | -0.0012 | 0.0456 | 0.9807 | 4.8717  | 0.3007 | -447.0422 |
| log_s_Campylobacter_conciscus  | SmallVesselStroke   | Weighted mode             | 6  | 0.9276 | 0.8387 | 1.0259 | 0.2037 | -0.0012 | 0.0456 | 0.9807 | 4.8717  | 0.3007 | -447.0422 |
| log_s_Campylobacter_conciscus  | Stroke              | MR Egger                  | 7  | 0.9816 | 0.9073 | 1.0620 | 0.6637 | -0.0002 | 0.0174 | 0.9896 | 7.4922  | 0.1865 | -353.9325 |
| log_s_Campylobacter_conciscus  | Stroke              | Weighted median           | 7  | 0.9881 | 0.9594 | 1.0176 | 0.4253 | -0.0002 | 0.0174 | 0.9896 | 7.4922  | 0.1865 | -353.9325 |
| log_s_Campylobacter_conciscus  | Stroke              | Inverse variance weighted | 7  | 0.9811 | 0.9584 | 1.0043 | 0.1097 | -0.0002 | 0.0174 | 0.9896 | 7.4922  | 0.1865 | -353.9325 |
| log_s_Campylobacter_conciscus  | Stroke              | Simple mode               | 7  | 1.0030 | 0.9529 | 1.0557 | 0.9128 | -0.0002 | 0.0174 | 0.9896 | 7.4922  | 0.1865 | -353.9325 |
| log_s_Campylobacter_conciscus  | Stroke              | Weighted mode             | 7  | 1.0056 | 0.9567 | 1.0569 | 0.8337 | -0.0002 | 0.0174 | 0.9896 | 7.4922  | 0.1865 | -353.9325 |
| log_s_Citrobacter_rodentium    | CardioEmbolicStroke | MR Egger                  | 9  | 0.6670 | 0.4474 | 0.9945 | 0.0873 | 0.1835  | 0.0931 | 0.0894 | 8.7715  | 0.3619 | -100.5709 |
| log_s_Citrobacter_rodentium    | CardioEmbolicStroke | Weighted median           | 9  | 0.9897 | 0.8680 | 1.1285 | 0.8772 | 0.1835  | 0.0931 | 0.0894 | 8.7715  | 0.3619 | -100.5709 |
| log_s_Citrobacter_rodentium    | CardioEmbolicStroke | Inverse variance weighted | 9  | 0.9859 | 0.8950 | 1.0861 | 0.7733 | 0.1835  | 0.0931 | 0.0894 | 8.7715  | 0.3619 | -100.5709 |
| log_s_Citrobacter_rodentium    | CardioEmbolicStroke | Simple mode               | 9  | 0.9654 | 0.7987 | 1.1668 | 0.7249 | 0.1835  | 0.0931 | 0.0894 | 8.7715  | 0.3619 | -100.5709 |
| log_s_Citrobacter_rodentium    | CardioEmbolicStroke | Weighted mode             | 9  | 0.9654 | 0.7929 | 1.1753 | 0.7346 | 0.1835  | 0.0931 | 0.0894 | 8.7715  | 0.3619 | -100.5709 |
| log_s_Citrobacter_rodentium    | IschemicStroke      | MR Egger                  | 11 | 0.9418 | 0.8706 | 1.0188 | 0.1691 | 0.0245  | 0.0191 | 0.2319 | 11.4199 | 0.3258 | -250.3227 |
| log_s_Citrobacter_rodentium    | IschemicStroke      | Weighted median           | 11 | 0.9996 | 0.9720 | 1.0280 | 0.9782 | 0.0245  | 0.0191 | 0.2319 | 11.4199 | 0.3258 | -250.3227 |
| log_s_Citrobacter_rodentium    | IschemicStroke      | Inverse variance weighted | 11 | 0.9897 | 0.9688 | 1.0110 | 0.3407 | 0.0245  | 0.0191 | 0.2319 | 11.4199 | 0.3258 | -250.3227 |
| log_s_Citrobacter_rodentium    | IschemicStroke      | Simple mode               | 11 | 0.9976 | 0.9497 | 1.0480 | 0.9265 | 0.0245  | 0.0191 | 0.2319 | 11.4199 | 0.3258 | -250.3227 |

|                             |                     |                           |    |        |        |        |        |         |        |        |         |        |           |
|-----------------------------|---------------------|---------------------------|----|--------|--------|--------|--------|---------|--------|--------|---------|--------|-----------|
| log_s_Citrobacter_rodentium | IschemicStroke      | Weighted mode             | 11 | 0.9986 | 0.9560 | 1.0432 | 0.9518 | 0.0245  | 0.0191 | 0.2319 | 11.4199 | 0.3258 | -250.3227 |
| log_s_Citrobacter_rodentium | LargeArteryStroke   | MR Egger                  | 10 | 1.0835 | 0.8027 | 1.4626 | 0.6145 | -0.0199 | 0.0724 | 0.7899 | 11.2498 | 0.1879 | -60.4195  |
| log_s_Citrobacter_rodentium | LargeArteryStroke   | Weighted median           | 10 | 0.9977 | 0.9098 | 1.0941 | 0.9611 | -0.0199 | 0.0724 | 0.7899 | 11.2498 | 0.1879 | -60.4195  |
| log_s_Citrobacter_rodentium | LargeArteryStroke   | Inverse variance weighted | 10 | 1.0403 | 0.9658 | 1.1205 | 0.2972 | -0.0199 | 0.0724 | 0.7899 | 11.2498 | 0.1879 | -60.4195  |
| log_s_Citrobacter_rodentium | LargeArteryStroke   | Simple mode               | 10 | 0.9872 | 0.8470 | 1.1506 | 0.8728 | -0.0199 | 0.0724 | 0.7899 | 11.2498 | 0.1879 | -60.4195  |
| log_s_Citrobacter_rodentium | LargeArteryStroke   | Weighted mode             | 10 | 0.9872 | 0.8502 | 1.1463 | 0.8696 | -0.0199 | 0.0724 | 0.7899 | 11.2498 | 0.1879 | -60.4195  |
| log_s_Citrobacter_rodentium | SmallVesselStroke   | MR Egger                  | 10 | 0.9876 | 0.8588 | 1.1356 | 0.8650 | 0.0030  | 0.0337 | 0.9323 | 6.7167  | 0.5675 | -187.2010 |
| log_s_Citrobacter_rodentium | SmallVesselStroke   | Weighted median           | 10 | 1.0106 | 0.9617 | 1.0620 | 0.6763 | 0.0030  | 0.0337 | 0.9323 | 6.7167  | 0.5675 | -187.2010 |
| log_s_Citrobacter_rodentium | SmallVesselStroke   | Inverse variance weighted | 10 | 0.9935 | 0.9579 | 1.0305 | 0.7277 | 0.0030  | 0.0337 | 0.9323 | 6.7167  | 0.5675 | -187.2010 |
| log_s_Citrobacter_rodentium | SmallVesselStroke   | Simple mode               | 10 | 1.0204 | 0.9462 | 1.1004 | 0.6123 | 0.0030  | 0.0337 | 0.9323 | 6.7167  | 0.5675 | -187.2010 |
| log_s_Citrobacter_rodentium | SmallVesselStroke   | Weighted mode             | 10 | 1.0222 | 0.9558 | 1.0931 | 0.5379 | 0.0030  | 0.0337 | 0.9323 | 6.7167  | 0.5675 | -187.2010 |
| log_s_Citrobacter_rodentium | Stroke              | MR Egger                  | 12 | 0.9995 | 0.9385 | 1.0644 | 0.9874 | -0.0023 | 0.0155 | 0.8871 | 6.6045  | 0.7622 | -275.6075 |
| log_s_Citrobacter_rodentium | Stroke              | Weighted median           | 12 | 0.9921 | 0.9709 | 1.0138 | 0.4731 | -0.0023 | 0.0155 | 0.8871 | 6.6045  | 0.7622 | -275.6075 |
| log_s_Citrobacter_rodentium | Stroke              | Inverse variance weighted | 12 | 0.9950 | 0.9786 | 1.0116 | 0.5521 | -0.0023 | 0.0155 | 0.8871 | 6.6045  | 0.7622 | -275.6075 |
| log_s_Citrobacter_rodentium | Stroke              | Simple mode               | 12 | 0.9923 | 0.9614 | 1.0242 | 0.6408 | -0.0023 | 0.0155 | 0.8871 | 6.6045  | 0.7622 | -275.6075 |
| log_s_Citrobacter_rodentium | Stroke              | Weighted mode             | 12 | 0.9928 | 0.9641 | 1.0222 | 0.6361 | -0.0023 | 0.0155 | 0.8871 | 6.6045  | 0.7622 | -275.6075 |
| log_s_Clostridium_butyricum | CardioEmbolicStroke | MR Egger                  | 7  | 0.9661 | 0.6155 | 1.5164 | 0.8866 | 0.0282  | 0.1274 | 0.8339 | 4.4549  | 0.4859 | -102.6318 |
| log_s_Clostridium_butyricum | CardioEmbolicStroke | Weighted median           | 7  | 1.0631 | 0.9364 | 1.2069 | 0.3447 | 0.0282  | 0.1274 | 0.8339 | 4.4549  | 0.4859 | -102.6318 |
| log_s_Clostridium_butyricum | CardioEmbolicStroke | Inverse variance weighted | 7  | 1.0151 | 0.9161 | 1.1248 | 0.7748 | 0.0282  | 0.1274 | 0.8339 | 4.4549  | 0.4859 | -102.6318 |
| log_s_Clostridium_butyricum | CardioEmbolicStroke | Simple mode               | 7  | 1.0573 | 0.8594 | 1.3008 | 0.6172 | 0.0282  | 0.1274 | 0.8339 | 4.4549  | 0.4859 | -102.6318 |
| log_s_Clostridium_butyricum | CardioEmbolicStroke | Weighted mode             | 7  | 1.0809 | 0.9161 | 1.2753 | 0.3922 | 0.0282  | 0.1274 | 0.8339 | 4.4549  | 0.4859 | -102.6318 |
| log_s_Clostridium_butyricum | IschemicStroke      | MR Egger                  | 7  | 1.0742 | 0.9683 | 1.1917 | 0.2345 | -0.0469 | 0.0294 | 0.1714 | 6.2223  | 0.3988 | -589.6530 |
| log_s_Clostridium_butyricum | IschemicStroke      | Weighted median           | 7  | 0.9956 | 0.9639 | 1.0284 | 0.7917 | -0.0469 | 0.0294 | 0.1714 | 6.2223  | 0.3988 | -589.6530 |
| log_s_Clostridium_butyricum | IschemicStroke      | Inverse variance weighted | 7  | 0.9893 | 0.9658 | 1.0134 | 0.3810 | -0.0469 | 0.0294 | 0.1714 | 6.2223  | 0.3988 | -589.6530 |
| log_s_Clostridium_butyricum | IschemicStroke      | Simple mode               | 7  | 1.0047 | 0.9548 | 1.0572 | 0.8624 | -0.0469 | 0.0294 | 0.1714 | 6.2223  | 0.3988 | -589.6530 |
| log_s_Clostridium_butyricum | IschemicStroke      | Weighted mode             | 7  | 1.0060 | 0.9622 | 1.0519 | 0.8001 | -0.0469 | 0.0294 | 0.1714 | 6.2223  | 0.3988 | -589.6530 |
| log_s_Clostridium_butyricum | LargeArteryStroke   | MR Egger                  | 7  | 0.9664 | 0.6909 | 1.3517 | 0.8496 | 0.0245  | 0.0949 | 0.8067 | 1.8978  | 0.8631 | -226.0591 |
| log_s_Clostridium_butyricum | LargeArteryStroke   | Weighted median           | 7  | 1.0169 | 0.9256 | 1.1172 | 0.7269 | 0.0245  | 0.0949 | 0.8067 | 1.8978  | 0.8631 | -226.0591 |
| log_s_Clostridium_butyricum | LargeArteryStroke   | Inverse variance weighted | 7  | 1.0089 | 0.9346 | 1.0890 | 0.8210 | 0.0245  | 0.0949 | 0.8067 | 1.8978  | 0.8631 | -226.0591 |
| log_s_Clostridium_butyricum | LargeArteryStroke   | Simple mode               | 7  | 1.0188 | 0.8914 | 1.1644 | 0.7941 | 0.0245  | 0.0949 | 0.8067 | 1.8978  | 0.8631 | -226.0591 |
| log_s_Clostridium_butyricum | LargeArteryStroke   | Weighted mode             | 7  | 1.0365 | 0.9120 | 1.1780 | 0.6027 | 0.0245  | 0.0949 | 0.8067 | 1.8978  | 0.8631 | -226.0591 |
| log_s_Clostridium_butyricum | SmallVesselStroke   | MR Egger                  | 7  | 1.1610 | 0.9647 | 1.3971 | 0.1749 | -0.0795 | 0.0525 | 0.1904 | 5.6704  | 0.4611 | -321.0495 |
| log_s_Clostridium_butyricum | SmallVesselStroke   | Weighted median           | 7  | 1.0207 | 0.9667 | 1.0777 | 0.4606 | -0.0795 | 0.0525 | 0.1904 | 5.6704  | 0.4611 | -321.0495 |
| log_s_Clostridium_butyricum | SmallVesselStroke   | Inverse variance weighted | 7  | 1.0100 | 0.9683 | 1.0536 | 0.6427 | -0.0795 | 0.0525 | 0.1904 | 5.6704  | 0.4611 | -321.0495 |
| log_s_Clostridium_butyricum | SmallVesselStroke   | Simple mode               | 7  | 1.0381 | 0.9554 | 1.1279 | 0.4111 | -0.0795 | 0.0525 | 0.1904 | 5.6704  | 0.4611 | -321.0495 |
| log_s_Clostridium_butyricum | SmallVesselStroke   | Weighted mode             | 7  | 1.0366 | 0.9587 | 1.1208 | 0.4022 | -0.0795 | 0.0525 | 0.1904 | 5.6704  | 0.4611 | -321.0495 |
| log_s_Clostridium_butyricum | Stroke              | MR Egger                  | 8  | 0.9839 | 0.9026 | 1.0727 | 0.7260 | 0.0061  | 0.0236 | 0.8057 | 6.9168  | 0.3286 | -561.7394 |
| log_s_Clostridium_butyricum | Stroke              | Weighted median           | 8  | 0.9908 | 0.9646 | 1.0178 | 0.5014 | 0.0061  | 0.0236 | 0.8057 | 6.9168  | 0.3286 | -561.7394 |
| log_s_Clostridium_butyricum | Stroke              | Inverse variance weighted | 8  | 0.9948 | 0.9752 | 1.0148 | 0.6084 | 0.0061  | 0.0236 | 0.8057 | 6.9168  | 0.3286 | -561.7394 |
| log_s_Clostridium_butyricum | Stroke              | Simple mode               | 8  | 0.9781 | 0.9423 | 1.0153 | 0.2829 | 0.0061  | 0.0236 | 0.8057 | 6.9168  | 0.3286 | -561.7394 |
| log_s_Clostridium_butyricum | Stroke              | Weighted mode             | 8  | 0.9834 | 0.9481 | 1.0200 | 0.3999 | 0.0061  | 0.0236 | 0.8057 | 6.9168  | 0.3286 | -561.7394 |
| log_s_Clostridium_hiranonis | CardioEmbolicStroke | MR Egger                  | 8  | 1.0991 | 0.8561 | 1.4110 | 0.4865 | -0.0794 | 0.0673 | 0.2827 | 6.9449  | 0.4346 | -36.2551  |
| log_s_Clostridium_hiranonis | CardioEmbolicStroke | Weighted median           | 8  | 0.9837 | 0.8640 | 1.1200 | 0.8039 | -0.0794 | 0.0673 | 0.2827 | 6.9449  | 0.4346 | -36.2551  |
| log_s_Clostridium_hiranonis | CardioEmbolicStroke | Inverse variance weighted | 8  | 0.9565 | 0.8693 | 1.0524 | 0.3615 | -0.0794 | 0.0673 | 0.2827 | 6.9449  | 0.4346 | -36.2551  |
| log_s_Clostridium_hiranonis | CardioEmbolicStroke | Simple mode               | 8  | 0.8768 | 0.7000 | 1.0984 | 0.2904 | -0.0794 | 0.0673 | 0.2827 | 6.9449  | 0.4346 | -36.2551  |
| log_s_Clostridium_hiranonis | CardioEmbolicStroke | Weighted mode             | 8  | 1.0048 | 0.8314 | 1.2143 | 0.9622 | -0.0794 | 0.0673 | 0.2827 | 6.9449  | 0.4346 | -36.2551  |
| log_s_Clostridium_hiranonis | IschemicStroke      | MR Egger                  | 8  | 1.0598 | 1.0007 | 1.1225 | 0.0946 | -0.0324 | 0.0155 | 0.0812 | 10.2867 | 0.1729 | -329.1344 |
| log_s_Clostridium_hiranonis | IschemicStroke      | Weighted median           | 8  | 1.0216 | 0.9940 | 1.0501 | 0.1267 | -0.0324 | 0.0155 | 0.0812 | 10.2867 | 0.1729 | -329.1344 |
| log_s_Clostridium_hiranonis | IschemicStroke      | Inverse variance weighted | 8  | 1.0014 | 0.9751 | 1.0284 | 0.9174 | -0.0324 | 0.0155 | 0.0812 | 10.2867 | 0.1729 | -329.1344 |
| log_s_Clostridium_hiranonis | IschemicStroke      | Simple mode               | 8  | 1.0203 | 0.9718 | 1.0713 | 0.4453 | -0.0324 | 0.0155 | 0.0812 | 10.2867 | 0.1729 | -329.1344 |
| log_s_Clostridium_hiranonis | IschemicStroke      | Weighted mode             | 8  | 1.0239 | 0.9879 | 1.0613 | 0.2371 | -0.0324 | 0.0155 | 0.0812 | 10.2867 | 0.1729 | -329.1344 |
| log_s_Clostridium_hiranonis | LargeArteryStroke   | MR Egger                  | 8  | 1.0370 | 0.8605 | 1.2497 | 0.7160 | -0.0222 | 0.0502 | 0.6746 | 3.3327  | 0.7661 | -108.6584 |
| log_s_Clostridium_hiranonis | LargeArteryStroke   | Weighted median           | 8  | 0.9800 | 0.8961 | 1.0719 | 0.6590 | -0.0222 | 0.0502 | 0.6746 | 3.3327  | 0.7661 | -108.6584 |

|                             |                     |                           |    |        |        |        |        |         |        |        |         |        |             |
|-----------------------------|---------------------|---------------------------|----|--------|--------|--------|--------|---------|--------|--------|---------|--------|-------------|
| log_s_Clostridium_hiranonis | LargeArteryStroke   | Inverse variance weighted | 8  | 0.9975 | 0.9288 | 1.0714 | 0.9458 | -0.0222 | 0.0502 | 0.6746 | 3.3327  | 0.7661 | -108.6584   |
| log_s_Clostridium_hiranonis | LargeArteryStroke   | Simple mode               | 8  | 0.9535 | 0.8159 | 1.1142 | 0.5676 | -0.0222 | 0.0502 | 0.6746 | 3.3327  | 0.7661 | -108.6584   |
| log_s_Clostridium_hiranonis | LargeArteryStroke   | Weighted mode             | 8  | 0.9556 | 0.8308 | 1.0993 | 0.5456 | -0.0222 | 0.0502 | 0.6746 | 3.3327  | 0.7661 | -108.6584   |
| log_s_Clostridium_hiranonis | SmallVesselStroke   | MR Egger                  | 8  | 1.1019 | 0.9935 | 1.2222 | 0.1158 | -0.0482 | 0.0279 | 0.1355 | 4.3825  | 0.7348 | -260.3189   |
| log_s_Clostridium_hiranonis | SmallVesselStroke   | Weighted median           | 8  | 1.0291 | 0.9763 | 1.0847 | 0.2865 | -0.0482 | 0.0279 | 0.1355 | 4.3825  | 0.7348 | -260.3189   |
| log_s_Clostridium_hiranonis | SmallVesselStroke   | Inverse variance weighted | 8  | 1.0130 | 0.9737 | 1.0539 | 0.5226 | -0.0482 | 0.0279 | 0.1355 | 4.3825  | 0.7348 | -260.3189   |
| log_s_Clostridium_hiranonis | SmallVesselStroke   | Simple mode               | 8  | 1.0250 | 0.9568 | 1.0981 | 0.5047 | -0.0482 | 0.0279 | 0.1355 | 4.3825  | 0.7348 | -260.3189   |
| log_s_Clostridium_hiranonis | SmallVesselStroke   | Weighted mode             | 8  | 1.0333 | 0.9685 | 1.1023 | 0.3546 | -0.0482 | 0.0279 | 0.1355 | 4.3825  | 0.7348 | -260.3189   |
| log_s_Clostridium_hiranonis | Stroke              | MR Egger                  | 9  | 1.0375 | 0.9886 | 1.0888 | 0.1790 | -0.0168 | 0.0131 | 0.2396 | 4.1356  | 0.8447 | -423.7244   |
| log_s_Clostridium_hiranonis | Stroke              | Weighted median           | 9  | 1.0101 | 0.9855 | 1.0354 | 0.4249 | -0.0168 | 0.0131 | 0.2396 | 4.1356  | 0.8447 | -423.7244   |
| log_s_Clostridium_hiranonis | Stroke              | Inverse variance weighted | 9  | 1.0076 | 0.9892 | 1.0263 | 0.4234 | -0.0168 | 0.0131 | 0.2396 | 4.1356  | 0.8447 | -423.7244   |
| log_s_Clostridium_hiranonis | Stroke              | Simple mode               | 9  | 0.9968 | 0.9609 | 1.0339 | 0.8663 | -0.0168 | 0.0131 | 0.2396 | 4.1356  | 0.8447 | -423.7244   |
| log_s_Clostridium_hiranonis | Stroke              | Weighted mode             | 9  | 1.0216 | 0.9860 | 1.0584 | 0.2725 | -0.0168 | 0.0131 | 0.2396 | 4.1356  | 0.8447 | -423.7244   |
| log_s_Clostridium_hylemonae | CardioEmbolicStroke | MR Egger                  | 5  | 1.4784 | 0.8226 | 2.6568 | 0.2823 | -0.1681 | 0.1274 | 0.2787 | 1.9359  | 0.7475 | -17051.2809 |
| log_s_Clostridium_hylemonae | CardioEmbolicStroke | Weighted median           | 5  | 1.0113 | 0.8611 | 1.1878 | 0.8909 | -0.1681 | 0.1274 | 0.2787 | 1.9359  | 0.7475 | -17051.2809 |
| log_s_Clostridium_hylemonae | CardioEmbolicStroke | Inverse variance weighted | 5  | 1.0059 | 0.8847 | 1.1437 | 0.9283 | -0.1681 | 0.1274 | 0.2787 | 1.9359  | 0.7475 | -17051.2809 |
| log_s_Clostridium_hylemonae | CardioEmbolicStroke | Simple mode               | 5  | 1.0308 | 0.8341 | 1.2740 | 0.7926 | -0.1681 | 0.1274 | 0.2787 | 1.9359  | 0.7475 | -17051.2809 |
| log_s_Clostridium_hylemonae | CardioEmbolicStroke | Weighted mode             | 5  | 1.0322 | 0.8268 | 1.2887 | 0.7934 | -0.1681 | 0.1274 | 0.2787 | 1.9359  | 0.7475 | -17051.2809 |
| log_s_Clostridium_hylemonae | IschemicStroke      | MR Egger                  | 10 | 1.0448 | 0.9288 | 1.1753 | 0.4864 | -0.0246 | 0.0280 | 0.4053 | 12.6276 | 0.1253 | -160.4641   |
| log_s_Clostridium_hylemonae | IschemicStroke      | Weighted median           | 10 | 1.0053 | 0.9728 | 1.0390 | 0.7509 | -0.0246 | 0.0280 | 0.4053 | 12.6276 | 0.1253 | -160.4641   |
| log_s_Clostridium_hylemonae | IschemicStroke      | Inverse variance weighted | 10 | 0.9927 | 0.9646 | 1.0217 | 0.6185 | -0.0246 | 0.0280 | 0.4053 | 12.6276 | 0.1253 | -160.4641   |
| log_s_Clostridium_hylemonae | IschemicStroke      | Simple mode               | 10 | 1.0163 | 0.9687 | 1.0662 | 0.5259 | -0.0246 | 0.0280 | 0.4053 | 12.6276 | 0.1253 | -160.4641   |
| log_s_Clostridium_hylemonae | IschemicStroke      | Weighted mode             | 10 | 1.0104 | 0.9682 | 1.0544 | 0.6465 | -0.0246 | 0.0280 | 0.4053 | 12.6276 | 0.1253 | -160.4641   |
| log_s_Clostridium_hylemonae | LargeArteryStroke   | MR Egger                  | 7  | 0.9818 | 0.6993 | 1.3783 | 0.9194 | 0.0062  | 0.0781 | 0.9393 | 2.1440  | 0.8289 | -300.4377   |
| log_s_Clostridium_hylemonae | LargeArteryStroke   | Weighted median           | 7  | 1.0246 | 0.9200 | 1.1412 | 0.6578 | 0.0062  | 0.0781 | 0.9393 | 2.1440  | 0.8289 | -300.4377   |
| log_s_Clostridium_hylemonae | LargeArteryStroke   | Inverse variance weighted | 7  | 0.9950 | 0.9117 | 1.0859 | 0.9103 | 0.0062  | 0.0781 | 0.9393 | 2.1440  | 0.8289 | -300.4377   |
| log_s_Clostridium_hylemonae | LargeArteryStroke   | Simple mode               | 7  | 1.0348 | 0.8877 | 1.2062 | 0.6774 | 0.0062  | 0.0781 | 0.9393 | 2.1440  | 0.8289 | -300.4377   |
| log_s_Clostridium_hylemonae | LargeArteryStroke   | Weighted mode             | 7  | 1.0327 | 0.9115 | 1.1701 | 0.6311 | 0.0062  | 0.0781 | 0.9393 | 2.1440  | 0.8289 | -300.4377   |
| log_s_Clostridium_hylemonae | SmallVesselStroke   | MR Egger                  | 7  | 0.9159 | 0.6531 | 1.2843 | 0.6321 | 0.0272  | 0.0780 | 0.7419 | 16.5891 | 0.0053 | -140.8366   |
| log_s_Clostridium_hylemonae | SmallVesselStroke   | Weighted median           | 7  | 0.9979 | 0.9328 | 1.0675 | 0.9502 | 0.0272  | 0.0780 | 0.7419 | 16.5891 | 0.0053 | -140.8366   |
| log_s_Clostridium_hylemonae | SmallVesselStroke   | Inverse variance weighted | 7  | 0.9705 | 0.8949 | 1.0526 | 0.4705 | 0.0272  | 0.0780 | 0.7419 | 16.5891 | 0.0053 | -140.8366   |
| log_s_Clostridium_hylemonae | SmallVesselStroke   | Simple mode               | 7  | 0.9921 | 0.9105 | 1.0810 | 0.8625 | 0.0272  | 0.0780 | 0.7419 | 16.5891 | 0.0053 | -140.8366   |
| log_s_Clostridium_hylemonae | SmallVesselStroke   | Weighted mode             | 7  | 1.0010 | 0.9299 | 1.0775 | 0.9797 | 0.0272  | 0.0780 | 0.7419 | 16.5891 | 0.0053 | -140.8366   |
| log_s_Clostridium_hylemonae | Stroke              | MR Egger                  | 10 | 1.0182 | 0.9217 | 1.1248 | 0.7323 | -0.0138 | 0.0239 | 0.5798 | 13.1039 | 0.1083 | -212.3160   |
| log_s_Clostridium_hylemonae | Stroke              | Weighted median           | 10 | 0.9916 | 0.9648 | 1.0192 | 0.5473 | -0.0138 | 0.0239 | 0.5798 | 13.1039 | 0.1083 | -212.3160   |
| log_s_Clostridium_hylemonae | Stroke              | Inverse variance weighted | 10 | 0.9897 | 0.9665 | 1.0134 | 0.3892 | -0.0138 | 0.0239 | 0.5798 | 13.1039 | 0.1083 | -212.3160   |
| log_s_Clostridium_hylemonae | Stroke              | Simple mode               | 10 | 0.9994 | 0.9617 | 1.0386 | 0.9773 | -0.0138 | 0.0239 | 0.5798 | 13.1039 | 0.1083 | -212.3160   |
| log_s_Clostridium_hylemonae | Stroke              | Weighted mode             | 10 | 0.9976 | 0.9621 | 1.0344 | 0.9006 | -0.0138 | 0.0239 | 0.5798 | 13.1039 | 0.1083 | -212.3160   |
| log_s_Clostridium_kluyveri  | CardioEmbolicStroke | MR Egger                  | 6  | 0.7564 | 0.4827 | 1.1854 | 0.2902 | 0.1759  | 0.1039 | 0.1657 | 8.9717  | 0.1102 | -246.7375   |
| log_s_Clostridium_kluyveri  | CardioEmbolicStroke | Weighted median           | 6  | 1.0992 | 0.9411 | 1.2839 | 0.2324 | 0.1759  | 0.1039 | 0.1657 | 8.9717  | 0.1102 | -246.7375   |
| log_s_Clostridium_kluyveri  | CardioEmbolicStroke | Inverse variance weighted | 6  | 1.0984 | 0.9504 | 1.2695 | 0.2038 | 0.1759  | 0.1039 | 0.1657 | 8.9717  | 0.1102 | -246.7375   |
| log_s_Clostridium_kluyveri  | CardioEmbolicStroke | Simple mode               | 6  | 1.1140 | 0.8746 | 1.4189 | 0.4217 | 0.1759  | 0.1039 | 0.1657 | 8.9717  | 0.1102 | -246.7375   |
| log_s_Clostridium_kluyveri  | CardioEmbolicStroke | Weighted mode             | 6  | 1.0962 | 0.8858 | 1.3565 | 0.4370 | 0.1759  | 0.1039 | 0.1657 | 8.9717  | 0.1102 | -246.7375   |
| log_s_Clostridium_kluyveri  | IschemicStroke      | MR Egger                  | 7  | 1.0611 | 0.9777 | 1.1516 | 0.2147 | -0.0359 | 0.0195 | 0.1254 | 7.9549  | 0.2414 | -536.5304   |
| log_s_Clostridium_kluyveri  | IschemicStroke      | Weighted median           | 7  | 0.9788 | 0.9468 | 1.0118 | 0.2044 | -0.0359 | 0.0195 | 0.1254 | 7.9549  | 0.2414 | -536.5304   |
| log_s_Clostridium_kluyveri  | IschemicStroke      | Inverse variance weighted | 7  | 0.9860 | 0.9593 | 1.0134 | 0.3126 | -0.0359 | 0.0195 | 0.1254 | 7.9549  | 0.2414 | -536.5304   |
| log_s_Clostridium_kluyveri  | IschemicStroke      | Simple mode               | 7  | 0.9633 | 0.9089 | 1.0211 | 0.2554 | -0.0359 | 0.0195 | 0.1254 | 7.9549  | 0.2414 | -536.5304   |
| log_s_Clostridium_kluyveri  | IschemicStroke      | Weighted mode             | 7  | 0.9663 | 0.9120 | 1.0238 | 0.2894 | -0.0359 | 0.0195 | 0.1254 | 7.9549  | 0.2414 | -536.5304   |
| log_s_Clostridium_kluyveri  | LargeArteryStroke   | MR Egger                  | 7  | 1.1700 | 0.8964 | 1.5270 | 0.3002 | -0.1259 | 0.0634 | 0.1038 | 7.4430  | 0.2818 | -170.3184   |
| log_s_Clostridium_kluyveri  | LargeArteryStroke   | Weighted median           | 7  | 0.9430 | 0.8453 | 1.0521 | 0.2934 | -0.1259 | 0.0634 | 0.1038 | 7.4430  | 0.2818 | -170.3184   |
| log_s_Clostridium_kluyveri  | LargeArteryStroke   | Inverse variance weighted | 7  | 0.9039 | 0.8289 | 0.9856 | 0.0222 | -0.1259 | 0.0634 | 0.1038 | 7.4430  | 0.2818 | -170.3184   |
| log_s_Clostridium_kluyveri  | LargeArteryStroke   | Simple mode               | 7  | 0.9803 | 0.8371 | 1.1479 | 0.8130 | -0.1259 | 0.0634 | 0.1038 | 7.4430  | 0.2818 | -170.3184   |
| log_s_Clostridium_kluyveri  | LargeArteryStroke   | Weighted mode             | 7  | 0.9589 | 0.8218 | 1.1188 | 0.6128 | -0.1259 | 0.0634 | 0.1038 | 7.4430  | 0.2818 | -170.3184   |

|                                   |                     |                           |    |        |        |        |        |         |        |        |         |        |            |
|-----------------------------------|---------------------|---------------------------|----|--------|--------|--------|--------|---------|--------|--------|---------|--------|------------|
| log_s_Clostridium_kluyveri        | SmallVesselStroke   | MR Egger                  | 7  | 1.1262 | 0.9727 | 1.3038 | 0.1727 | -0.0718 | 0.0350 | 0.0955 | 7.1865  | 0.3039 | -273.4936  |
| log_s_Clostridium_kluyveri        | SmallVesselStroke   | Weighted median           | 7  | 0.9555 | 0.9020 | 1.0123 | 0.1224 | -0.0718 | 0.0350 | 0.0955 | 7.1865  | 0.3039 | -273.4936  |
| log_s_Clostridium_kluyveri        | SmallVesselStroke   | Inverse variance weighted | 7  | 0.9726 | 0.9280 | 1.0193 | 0.2457 | -0.0718 | 0.0350 | 0.0955 | 7.1865  | 0.3039 | -273.4936  |
| log_s_Clostridium_kluyveri        | SmallVesselStroke   | Simple mode               | 7  | 0.9398 | 0.8690 | 1.0163 | 0.1708 | -0.0718 | 0.0350 | 0.0955 | 7.1865  | 0.3039 | -273.4936  |
| log_s_Clostridium_kluyveri        | SmallVesselStroke   | Weighted mode             | 7  | 0.9428 | 0.8657 | 1.0267 | 0.2244 | -0.0718 | 0.0350 | 0.0955 | 7.1865  | 0.3039 | -273.4936  |
| log_s_Clostridium_kluyveri        | Stroke              | MR Egger                  | 8  | 1.0280 | 0.9607 | 1.1000 | 0.4548 | -0.0180 | 0.0163 | 0.3128 | 6.8399  | 0.4457 | -423.4080  |
| log_s_Clostridium_kluyveri        | Stroke              | Weighted median           | 8  | 0.9953 | 0.9696 | 1.0218 | 0.7268 | -0.0180 | 0.0163 | 0.3128 | 6.8399  | 0.4457 | -423.4080  |
| log_s_Clostridium_kluyveri        | Stroke              | Inverse variance weighted | 8  | 0.9913 | 0.9717 | 1.0112 | 0.3876 | -0.0180 | 0.0163 | 0.3128 | 6.8399  | 0.4457 | -423.4080  |
| log_s_Clostridium_kluyveri        | Stroke              | Simple mode               | 8  | 0.9888 | 0.9499 | 1.0292 | 0.5984 | -0.0180 | 0.0163 | 0.3128 | 6.8399  | 0.4457 | -423.4080  |
| log_s_Clostridium_kluyveri        | Stroke              | Weighted mode             | 8  | 0.9958 | 0.9600 | 1.0329 | 0.8263 | -0.0180 | 0.0163 | 0.3128 | 6.8399  | 0.4457 | -423.4080  |
| log_s_Clostridium_phytofermentans | CardioEmbolicStroke | MR Egger                  | 4  | 0.4283 | 0.1734 | 1.0582 | 0.2075 | 0.3419  | 0.1992 | 0.2283 | 3.2796  | 0.3505 | 1517.4294  |
| log_s_Clostridium_phytofermentans | CardioEmbolicStroke | Weighted median           | 4  | 0.9334 | 0.7962 | 1.0941 | 0.3950 | 0.3419  | 0.1992 | 0.2283 | 3.2796  | 0.3505 | 1517.4294  |
| log_s_Clostridium_phytofermentans | CardioEmbolicStroke | Inverse variance weighted | 4  | 0.9382 | 0.8226 | 1.0702 | 0.3423 | 0.3419  | 0.1992 | 0.2283 | 3.2796  | 0.3505 | 1517.4294  |
| log_s_Clostridium_phytofermentans | CardioEmbolicStroke | Simple mode               | 4  | 0.9384 | 0.7472 | 1.1785 | 0.6225 | 0.3419  | 0.1992 | 0.2283 | 3.2796  | 0.3505 | 1517.4294  |
| log_s_Clostridium_phytofermentans | CardioEmbolicStroke | Weighted mode             | 4  | 0.9105 | 0.7398 | 1.1205 | 0.4411 | 0.3419  | 0.1992 | 0.2283 | 3.2796  | 0.3505 | 1517.4294  |
| log_s_Clostridium_phytofermentans | IschemicStroke      | MR Egger                  | 5  | 1.0889 | 0.9582 | 1.2374 | 0.2827 | -0.0433 | 0.0298 | 0.2422 | 4.7479  | 0.3142 | -7972.4705 |
| log_s_Clostridium_phytofermentans | IschemicStroke      | Weighted median           | 5  | 0.9823 | 0.9487 | 1.0172 | 0.3157 | -0.0433 | 0.0298 | 0.2422 | 4.7479  | 0.3142 | -7972.4705 |
| log_s_Clostridium_phytofermentans | IschemicStroke      | Inverse variance weighted | 5  | 0.9925 | 0.9641 | 1.0218 | 0.6127 | -0.0433 | 0.0298 | 0.2422 | 4.7479  | 0.3142 | -7972.4705 |
| log_s_Clostridium_phytofermentans | IschemicStroke      | Simple mode               | 5  | 0.9682 | 0.9144 | 1.0251 | 0.3296 | -0.0433 | 0.0298 | 0.2422 | 4.7479  | 0.3142 | -7972.4705 |
| log_s_Clostridium_phytofermentans | IschemicStroke      | Weighted mode             | 5  | 0.9676 | 0.9147 | 1.0235 | 0.3141 | -0.0433 | 0.0298 | 0.2422 | 4.7479  | 0.3142 | -7972.4705 |
| log_s_Clostridium_phytofermentans | LargeArteryStroke   | MR Egger                  | 5  | 0.9579 | 0.6243 | 1.4698 | 0.8564 | 0.0155  | 0.0993 | 0.8858 | 1.8037  | 0.6141 | -4437.8221 |
| log_s_Clostridium_phytofermentans | LargeArteryStroke   | Weighted median           | 5  | 0.9892 | 0.8897 | 1.0997 | 0.8401 | 0.0155  | 0.0993 | 0.8858 | 1.8037  | 0.6141 | -4437.8221 |
| log_s_Clostridium_phytofermentans | LargeArteryStroke   | Inverse variance weighted | 5  | 0.9904 | 0.9081 | 1.0803 | 0.8282 | 0.0155  | 0.0993 | 0.8858 | 1.8037  | 0.6141 | -4437.8221 |
| log_s_Clostridium_phytofermentans | LargeArteryStroke   | Simple mode               | 5  | 0.9875 | 0.8459 | 1.1529 | 0.8816 | 0.0155  | 0.0993 | 0.8858 | 1.8037  | 0.6141 | -4437.8221 |
| log_s_Clostridium_phytofermentans | LargeArteryStroke   | Weighted mode             | 5  | 0.9875 | 0.8462 | 1.1525 | 0.8813 | 0.0155  | 0.0993 | 0.8858 | 1.8037  | 0.6141 | -4437.8221 |
| log_s_Clostridium_phytofermentans | SmallVesselStroke   | MR Egger                  | 5  | 1.2398 | 0.9820 | 1.5652 | 0.1685 | -0.0981 | 0.0542 | 0.1679 | 4.4865  | 0.3441 | -4463.6519 |
| log_s_Clostridium_phytofermentans | SmallVesselStroke   | Weighted median           | 5  | 1.0280 | 0.9662 | 1.0937 | 0.3833 | -0.0981 | 0.0542 | 0.1679 | 4.4865  | 0.3441 | -4463.6519 |
| log_s_Clostridium_phytofermentans | SmallVesselStroke   | Inverse variance weighted | 5  | 1.0042 | 0.9544 | 1.0566 | 0.8709 | -0.0981 | 0.0542 | 0.1679 | 4.4865  | 0.3441 | -4463.6519 |
| log_s_Clostridium_phytofermentans | SmallVesselStroke   | Simple mode               | 5  | 1.0405 | 0.9550 | 1.1336 | 0.4154 | -0.0981 | 0.0542 | 0.1679 | 4.4865  | 0.3441 | -4463.6519 |
| log_s_Clostridium_phytofermentans | SmallVesselStroke   | Weighted mode             | 5  | 1.0371 | 0.9570 | 1.1238 | 0.4250 | -0.0981 | 0.0542 | 0.1679 | 4.4865  | 0.3441 | -4463.6519 |
| log_s_Clostridium_phytofermentans | Stroke              | MR Egger                  | 5  | 1.0488 | 0.9012 | 1.2206 | 0.5814 | -0.0268 | 0.0354 | 0.5039 | 6.2084  | 0.1019 | -7672.4187 |
| log_s_Clostridium_phytofermentans | Stroke              | Weighted median           | 5  | 1.0013 | 0.9697 | 1.0340 | 0.9364 | -0.0268 | 0.0354 | 0.5039 | 6.2084  | 0.1019 | -7672.4187 |
| log_s_Clostridium_phytofermentans | Stroke              | Inverse variance weighted | 5  | 0.9905 | 0.9605 | 1.0213 | 0.5409 | -0.0268 | 0.0354 | 0.5039 | 6.2084  | 0.1019 | -7672.4187 |
| log_s_Clostridium_phytofermentans | Stroke              | Simple mode               | 5  | 1.0056 | 0.9593 | 1.0541 | 0.8281 | -0.0268 | 0.0354 | 0.5039 | 6.2084  | 0.1019 | -7672.4187 |
| log_s_Clostridium_phytofermentans | Stroke              | Weighted mode             | 5  | 1.0074 | 0.9642 | 1.0525 | 0.7594 | -0.0268 | 0.0354 | 0.5039 | 6.2084  | 0.1019 | -7672.4187 |
| log_s_Collinsella_stercoris       | CardioEmbolicStroke | MR Egger                  | 11 | 1.0511 | 0.7931 | 1.3929 | 0.7368 | -0.0205 | 0.0686 | 0.7724 | 6.4594  | 0.6932 | -39.9256   |
| log_s_Collinsella_stercoris       | CardioEmbolicStroke | Weighted median           | 11 | 1.0313 | 0.9248 | 1.1502 | 0.5795 | -0.0205 | 0.0686 | 0.7724 | 6.4594  | 0.6932 | -39.9256   |
| log_s_Collinsella_stercoris       | CardioEmbolicStroke | Inverse variance weighted | 11 | 1.0090 | 0.9265 | 1.0989 | 0.8364 | -0.0205 | 0.0686 | 0.7724 | 6.4594  | 0.6932 | -39.9256   |
| log_s_Collinsella_stercoris       | CardioEmbolicStroke | Simple mode               | 11 | 1.0442 | 0.8933 | 1.2205 | 0.5992 | -0.0205 | 0.0686 | 0.7724 | 6.4594  | 0.6932 | -39.9256   |
| log_s_Collinsella_stercoris       | CardioEmbolicStroke | Weighted mode             | 11 | 1.0412 | 0.8986 | 1.2064 | 0.6030 | -0.0205 | 0.0686 | 0.7724 | 6.4594  | 0.6932 | -39.9256   |
| log_s_Collinsella_stercoris       | IschemicStroke      | MR Egger                  | 13 | 1.0159 | 0.9435 | 1.0938 | 0.6844 | -0.0051 | 0.0185 | 0.7860 | 16.5893 | 0.1206 | -167.0104  |
| log_s_Collinsella_stercoris       | IschemicStroke      | Weighted median           | 13 | 1.0112 | 0.9848 | 1.0383 | 0.4074 | -0.0051 | 0.0185 | 0.7860 | 16.5893 | 0.1206 | -167.0104  |
| log_s_Collinsella_stercoris       | IschemicStroke      | Inverse variance weighted | 13 | 1.0058 | 0.9839 | 1.0282 | 0.6080 | -0.0051 | 0.0185 | 0.7860 | 16.5893 | 0.1206 | -167.0104  |
| log_s_Collinsella_stercoris       | IschemicStroke      | Simple mode               | 13 | 1.0257 | 0.9844 | 1.0688 | 0.2489 | -0.0051 | 0.0185 | 0.7860 | 16.5893 | 0.1206 | -167.0104  |
| log_s_Collinsella_stercoris       | IschemicStroke      | Weighted mode             | 13 | 1.0143 | 0.9770 | 1.0530 | 0.4722 | -0.0051 | 0.0185 | 0.7860 | 16.5893 | 0.1206 | -167.0104  |
| log_s_Collinsella_stercoris       | LargeArteryStroke   | MR Egger                  | 13 | 1.2838 | 1.0612 | 1.5532 | 0.0260 | -0.1263 | 0.0480 | 0.0234 | 17.3863 | 0.1356 | -21.3421   |
| log_s_Collinsella_stercoris       | LargeArteryStroke   | Weighted median           | 13 | 0.9773 | 0.8960 | 1.0658 | 0.6032 | -0.1263 | 0.0480 | 0.0234 | 17.3863 | 0.1356 | -21.3421   |
| log_s_Collinsella_stercoris       | LargeArteryStroke   | Inverse variance weighted | 13 | 1.0073 | 0.9372 | 1.0826 | 0.8436 | -0.1263 | 0.0480 | 0.0234 | 17.3863 | 0.1356 | -21.3421   |
| log_s_Collinsella_stercoris       | LargeArteryStroke   | Simple mode               | 13 | 0.9461 | 0.8031 | 1.1146 | 0.5204 | -0.1263 | 0.0480 | 0.0234 | 17.3863 | 0.1356 | -21.3421   |
| log_s_Collinsella_stercoris       | LargeArteryStroke   | Weighted mode             | 13 | 0.9587 | 0.8205 | 1.1201 | 0.6048 | -0.1263 | 0.0480 | 0.0234 | 17.3863 | 0.1356 | -21.3421   |
| log_s_Collinsella_stercoris       | SmallVesselStroke   | MR Egger                  | 13 | 1.0502 | 0.9427 | 1.1700 | 0.3926 | -0.0220 | 0.0271 | 0.4340 | 8.9468  | 0.6268 | -79.6513   |
| log_s_Collinsella_stercoris       | SmallVesselStroke   | Weighted median           | 13 | 1.0117 | 0.9654 | 1.0602 | 0.6270 | -0.0220 | 0.0271 | 0.4340 | 8.9468  | 0.6268 | -79.6513   |
| log_s_Collinsella_stercoris       | SmallVesselStroke   | Inverse variance weighted | 13 | 1.0065 | 0.9732 | 1.0410 | 0.7044 | -0.0220 | 0.0271 | 0.4340 | 8.9468  | 0.6268 | -79.6513   |

|                                    |                     |                           |    |        |        |        |        |         |        |        |         |        |           |
|------------------------------------|---------------------|---------------------------|----|--------|--------|--------|--------|---------|--------|--------|---------|--------|-----------|
| log_s_Collinsella_stercoris        | SmallVesselStroke   | Simple mode               | 13 | 1.0347 | 0.9618 | 1.1133 | 0.3782 | -0.0220 | 0.0271 | 0.4340 | 8.9468  | 0.6268 | -79.6513  |
| log_s_Collinsella_stercoris        | SmallVesselStroke   | Weighted mode             | 13 | 1.0161 | 0.9455 | 1.0920 | 0.6713 | -0.0220 | 0.0271 | 0.4340 | 8.9468  | 0.6268 | -79.6513  |
| log_s_Collinsella_stercoris        | Stroke              | MR Egger                  | 13 | 1.0153 | 0.9541 | 1.0805 | 0.6407 | -0.0078 | 0.0155 | 0.6238 | 16.0123 | 0.1407 | -215.8284 |
| log_s_Collinsella_stercoris        | Stroke              | Weighted median           | 13 | 1.0003 | 0.9778 | 1.0233 | 0.9797 | -0.0078 | 0.0155 | 0.6238 | 16.0123 | 0.1407 | -215.8284 |
| log_s_Collinsella_stercoris        | Stroke              | Inverse variance weighted | 13 | 1.0000 | 0.9817 | 1.0186 | 0.9990 | -0.0078 | 0.0155 | 0.6238 | 16.0123 | 0.1407 | -215.8284 |
| log_s_Collinsella_stercoris        | Stroke              | Simple mode               | 13 | 1.0058 | 0.9695 | 1.0434 | 0.7643 | -0.0078 | 0.0155 | 0.6238 | 16.0123 | 0.1407 | -215.8284 |
| log_s_Collinsella_stercoris        | Stroke              | Weighted mode             | 13 | 1.0021 | 0.9694 | 1.0360 | 0.9035 | -0.0078 | 0.0155 | 0.6238 | 16.0123 | 0.1407 | -215.8284 |
| log_s_Corynebacterium_glucuronolyt | CardioEmbolicStroke | MR Egger                  | 11 | 0.9694 | 0.6831 | 1.3756 | 0.8657 | 0.0394  | 0.0897 | 0.6706 | 5.0851  | 0.8268 | -71.4415  |
| log_s_Corynebacterium_glucuronolyt | CardioEmbolicStroke | Weighted median           | 11 | 1.0603 | 0.9504 | 1.1829 | 0.2943 | 0.0394  | 0.0897 | 0.6706 | 5.0851  | 0.8268 | -71.4415  |
| log_s_Corynebacterium_glucuronolyt | CardioEmbolicStroke | Inverse variance weighted | 11 | 1.0464 | 0.9653 | 1.1343 | 0.2709 | 0.0394  | 0.0897 | 0.6706 | 5.0851  | 0.8268 | -71.4415  |
| log_s_Corynebacterium_glucuronolyt | CardioEmbolicStroke | Simple mode               | 11 | 1.0718 | 0.9129 | 1.2583 | 0.4170 | 0.0394  | 0.0897 | 0.6706 | 5.0851  | 0.8268 | -71.4415  |
| log_s_Corynebacterium_glucuronolyt | CardioEmbolicStroke | Weighted mode             | 11 | 1.0279 | 0.8922 | 1.1842 | 0.7113 | 0.0394  | 0.0897 | 0.6706 | 5.0851  | 0.8268 | -71.4415  |
| log_s_Corynebacterium_glucuronolyt | IschemicStroke      | MR Egger                  | 12 | 0.9959 | 0.8987 | 1.1036 | 0.9390 | -0.0041 | 0.0264 | 0.8792 | 16.7409 | 0.0803 | -168.2199 |
| log_s_Corynebacterium_glucuronolyt | IschemicStroke      | Weighted median           | 12 | 0.9741 | 0.9489 | 1.0000 | 0.0502 | -0.0041 | 0.0264 | 0.8792 | 16.7409 | 0.0803 | -168.2199 |
| log_s_Corynebacterium_glucuronolyt | IschemicStroke      | Inverse variance weighted | 12 | 0.9880 | 0.9657 | 1.0108 | 0.3004 | -0.0041 | 0.0264 | 0.8792 | 16.7409 | 0.0803 | -168.2199 |
| log_s_Corynebacterium_glucuronolyt | IschemicStroke      | Simple mode               | 12 | 0.9696 | 0.9286 | 1.0123 | 0.1883 | -0.0041 | 0.0264 | 0.8792 | 16.7409 | 0.0803 | -168.2199 |
| log_s_Corynebacterium_glucuronolyt | IschemicStroke      | Weighted mode             | 12 | 0.9667 | 0.9353 | 0.9991 | 0.0692 | -0.0041 | 0.0264 | 0.8792 | 16.7409 | 0.0803 | -168.2199 |
| log_s_Corynebacterium_glucuronolyt | LargeArteryStroke   | MR Egger                  | 11 | 1.1639 | 0.8942 | 1.5149 | 0.2884 | -0.0891 | 0.0674 | 0.2189 | 10.6107 | 0.3886 | -76.1407  |
| log_s_Corynebacterium_glucuronolyt | LargeArteryStroke   | Weighted median           | 11 | 0.9993 | 0.9171 | 1.0888 | 0.9868 | -0.0891 | 0.0674 | 0.2189 | 10.6107 | 0.3886 | -76.1407  |
| log_s_Corynebacterium_glucuronolyt | LargeArteryStroke   | Inverse variance weighted | 11 | 0.9789 | 0.9200 | 1.0416 | 0.5012 | -0.0891 | 0.0674 | 0.2189 | 10.6107 | 0.3886 | -76.1407  |
| log_s_Corynebacterium_glucuronolyt | LargeArteryStroke   | Simple mode               | 11 | 1.0159 | 0.8822 | 1.1698 | 0.8313 | -0.0891 | 0.0674 | 0.2189 | 10.6107 | 0.3886 | -76.1407  |
| log_s_Corynebacterium_glucuronolyt | LargeArteryStroke   | Weighted mode             | 11 | 1.0174 | 0.9036 | 1.1455 | 0.7816 | -0.0891 | 0.0674 | 0.2189 | 10.6107 | 0.3886 | -76.1407  |
| log_s_Corynebacterium_glucuronolyt | SmallVesselStroke   | MR Egger                  | 11 | 1.0046 | 0.8680 | 1.1627 | 0.9523 | -0.0118 | 0.0374 | 0.7588 | 7.2466  | 0.6115 | -197.3979 |
| log_s_Corynebacterium_glucuronolyt | SmallVesselStroke   | Weighted median           | 11 | 0.9764 | 0.9322 | 1.0228 | 0.3143 | -0.0118 | 0.0374 | 0.7588 | 7.2466  | 0.6115 | -197.3979 |
| log_s_Corynebacterium_glucuronolyt | SmallVesselStroke   | Inverse variance weighted | 11 | 0.9818 | 0.9494 | 1.0153 | 0.2832 | -0.0118 | 0.0374 | 0.7588 | 7.2466  | 0.6115 | -197.3979 |
| log_s_Corynebacterium_glucuronolyt | SmallVesselStroke   | Simple mode               | 11 | 0.9947 | 0.9267 | 1.0677 | 0.8860 | -0.0118 | 0.0374 | 0.7588 | 7.2466  | 0.6115 | -197.3979 |
| log_s_Corynebacterium_glucuronolyt | SmallVesselStroke   | Weighted mode             | 11 | 0.9857 | 0.9246 | 1.0509 | 0.6696 | -0.0118 | 0.0374 | 0.7588 | 7.2466  | 0.6115 | -197.3979 |
| log_s_Corynebacterium_glucuronolyt | Stroke              | MR Egger                  | 12 | 1.0050 | 0.9213 | 1.0964 | 0.9119 | -0.0067 | 0.0223 | 0.7713 | 16.4559 | 0.0873 | -243.0464 |
| log_s_Corynebacterium_glucuronolyt | Stroke              | Weighted median           | 12 | 0.9806 | 0.9586 | 1.0030 | 0.0898 | -0.0067 | 0.0223 | 0.7713 | 16.4559 | 0.0873 | -243.0464 |
| log_s_Corynebacterium_glucuronolyt | Stroke              | Inverse variance weighted | 12 | 0.9922 | 0.9732 | 1.0116 | 0.4262 | -0.0067 | 0.0223 | 0.7713 | 16.4559 | 0.0873 | -243.0464 |
| log_s_Corynebacterium_glucuronolyt | Stroke              | Simple mode               | 12 | 0.9754 | 0.9409 | 1.0111 | 0.2019 | -0.0067 | 0.0223 | 0.7713 | 16.4559 | 0.0873 | -243.0464 |
| log_s_Corynebacterium_glucuronolyt | Stroke              | Weighted mode             | 12 | 0.9719 | 0.9417 | 1.0031 | 0.1046 | -0.0067 | 0.0223 | 0.7713 | 16.4559 | 0.0873 | -243.0464 |
| log_s_Desulfovibrio_alaskensis     | CardioEmbolicStroke | MR Egger                  | 9  | 1.0520 | 0.6475 | 1.7092 | 0.8436 | -0.0120 | 0.1053 | 0.9125 | 8.0966  | 0.3242 | -211.9063 |
| log_s_Desulfovibrio_alaskensis     | CardioEmbolicStroke | Weighted median           | 9  | 1.0121 | 0.8913 | 1.1492 | 0.8530 | -0.0120 | 0.1053 | 0.9125 | 8.0966  | 0.3242 | -211.9063 |
| log_s_Desulfovibrio_alaskensis     | CardioEmbolicStroke | Inverse variance weighted | 9  | 1.0234 | 0.9326 | 1.1229 | 0.6259 | -0.0120 | 0.1053 | 0.9125 | 8.0966  | 0.3242 | -211.9063 |
| log_s_Desulfovibrio_alaskensis     | CardioEmbolicStroke | Simple mode               | 9  | 0.9525 | 0.7803 | 1.1627 | 0.6453 | -0.0120 | 0.1053 | 0.9125 | 8.0966  | 0.3242 | -211.9063 |
| log_s_Desulfovibrio_alaskensis     | CardioEmbolicStroke | Weighted mode             | 9  | 0.9726 | 0.8053 | 1.1748 | 0.7807 | -0.0120 | 0.1053 | 0.9125 | 8.0966  | 0.3242 | -211.9063 |
| log_s_Desulfovibrio_alaskensis     | IschemicStroke      | MR Egger                  | 10 | 1.0900 | 1.0016 | 1.1862 | 0.0808 | -0.0287 | 0.0188 | 0.1660 | 10.9699 | 0.2778 | -255.3788 |
| log_s_Desulfovibrio_alaskensis     | IschemicStroke      | Weighted median           | 10 | 1.0090 | 0.9791 | 1.0398 | 0.5603 | -0.0287 | 0.0188 | 0.1660 | 10.9699 | 0.2778 | -255.3788 |
| log_s_Desulfovibrio_alaskensis     | IschemicStroke      | Inverse variance weighted | 10 | 1.0228 | 0.9998 | 1.0463 | 0.0517 | -0.0287 | 0.0188 | 0.1660 | 10.9699 | 0.2778 | -255.3788 |
| log_s_Desulfovibrio_alaskensis     | IschemicStroke      | Simple mode               | 10 | 1.0027 | 0.9504 | 1.0579 | 0.9230 | -0.0287 | 0.0188 | 0.1660 | 10.9699 | 0.2778 | -255.3788 |
| log_s_Desulfovibrio_alaskensis     | IschemicStroke      | Weighted mode             | 10 | 1.0004 | 0.9574 | 1.0453 | 0.9864 | -0.0287 | 0.0188 | 0.1660 | 10.9699 | 0.2778 | -255.3788 |
| log_s_Desulfovibrio_alaskensis     | LargeArteryStroke   | MR Egger                  | 9  | 1.2185 | 0.8714 | 1.7039 | 0.2858 | -0.0908 | 0.0728 | 0.2524 | 5.2928  | 0.7259 | -397.7475 |
| log_s_Desulfovibrio_alaskensis     | LargeArteryStroke   | Weighted median           | 9  | 0.9837 | 0.9000 | 1.0752 | 0.7175 | -0.0908 | 0.0728 | 0.2524 | 5.2928  | 0.7259 | -397.7475 |
| log_s_Desulfovibrio_alaskensis     | LargeArteryStroke   | Inverse variance weighted | 9  | 0.9889 | 0.9232 | 1.0593 | 0.7496 | -0.0908 | 0.0728 | 0.2524 | 5.2928  | 0.7259 | -397.7475 |
| log_s_Desulfovibrio_alaskensis     | LargeArteryStroke   | Simple mode               | 9  | 0.9835 | 0.8421 | 1.1487 | 0.8391 | -0.0908 | 0.0728 | 0.2524 | 5.2928  | 0.7259 | -397.7475 |
| log_s_Desulfovibrio_alaskensis     | LargeArteryStroke   | Weighted mode             | 9  | 0.9876 | 0.8572 | 1.1377 | 0.8669 | -0.0908 | 0.0728 | 0.2524 | 5.2928  | 0.7259 | -397.7475 |
| log_s_Desulfovibrio_alaskensis     | SmallVesselStroke   | MR Egger                  | 9  | 1.2919 | 1.0613 | 1.5726 | 0.0380 | -0.0975 | 0.0425 | 0.0556 | 13.0776 | 0.1092 | -331.4222 |
| log_s_Desulfovibrio_alaskensis     | SmallVesselStroke   | Weighted median           | 9  | 1.0411 | 0.9832 | 1.1024 | 0.1678 | -0.0975 | 0.0425 | 0.0556 | 13.0776 | 0.1092 | -331.4222 |
| log_s_Desulfovibrio_alaskensis     | SmallVesselStroke   | Inverse variance weighted | 9  | 1.0314 | 0.9819 | 1.0833 | 0.2178 | -0.0975 | 0.0425 | 0.0556 | 13.0776 | 0.1092 | -331.4222 |
| log_s_Desulfovibrio_alaskensis     | SmallVesselStroke   | Simple mode               | 9  | 1.0585 | 0.9591 | 1.1683 | 0.2912 | -0.0975 | 0.0425 | 0.0556 | 13.0776 | 0.1092 | -331.4222 |
| log_s_Desulfovibrio_alaskensis     | SmallVesselStroke   | Weighted mode             | 9  | 1.0605 | 0.9597 | 1.1719 | 0.2825 | -0.0975 | 0.0425 | 0.0556 | 13.0776 | 0.1092 | -331.4222 |
| log_s_Desulfovibrio_alaskensis     | Stroke              | MR Egger                  | 12 | 1.0585 | 0.9777 | 1.1459 | 0.1909 | -0.0164 | 0.0179 | 0.3808 | 14.0950 | 0.1687 | -182.1094 |

|                                 |                     |                           |    |        |        |        |        |         |        |        |         |        |           |
|---------------------------------|---------------------|---------------------------|----|--------|--------|--------|--------|---------|--------|--------|---------|--------|-----------|
| log_s_Desulfovibrio_alaskensis  | Stroke              | Weighted median           | 12 | 1.0116 | 0.9865 | 1.0374 | 0.3673 | -0.0164 | 0.0179 | 0.3808 | 14.0950 | 0.1687 | -182.1094 |
| log_s_Desulfovibrio_alaskensis  | Stroke              | Inverse variance weighted | 12 | 1.0211 | 1.0008 | 1.0419 | 0.0412 | -0.0164 | 0.0179 | 0.3808 | 14.0950 | 0.1687 | -182.1094 |
| log_s_Desulfovibrio_alaskensis  | Stroke              | Simple mode               | 12 | 1.0087 | 0.9659 | 1.0534 | 0.7031 | -0.0164 | 0.0179 | 0.3808 | 14.0950 | 0.1687 | -182.1094 |
| log_s_Desulfovibrio_alaskensis  | Stroke              | Weighted mode             | 12 | 1.0101 | 0.9684 | 1.0535 | 0.6503 | -0.0164 | 0.0179 | 0.3808 | 14.0950 | 0.1687 | -182.1094 |
| log_s_Enterobacter_asburiae     | CardioEmbolicStroke | MR Egger                  | 14 | 1.0865 | 0.7580 | 1.5575 | 0.6595 | -0.0644 | 0.0767 | 0.4174 | 13.9739 | 0.3024 | -48.3071  |
| log_s_Enterobacter_asburiae     | CardioEmbolicStroke | Weighted median           | 14 | 0.9785 | 0.8764 | 1.0925 | 0.6989 | -0.0644 | 0.0767 | 0.4174 | 13.9739 | 0.3024 | -48.3071  |
| log_s_Enterobacter_asburiae     | CardioEmbolicStroke | Inverse variance weighted | 14 | 0.9349 | 0.8627 | 1.0132 | 0.1008 | -0.0644 | 0.0767 | 0.4174 | 13.9739 | 0.3024 | -48.3071  |
| log_s_Enterobacter_asburiae     | CardioEmbolicStroke | Simple mode               | 14 | 0.9907 | 0.8094 | 1.2126 | 0.9289 | -0.0644 | 0.0767 | 0.4174 | 13.9739 | 0.3024 | -48.3071  |
| log_s_Enterobacter_asburiae     | CardioEmbolicStroke | Weighted mode             | 14 | 0.9907 | 0.8294 | 1.1832 | 0.9191 | -0.0644 | 0.0767 | 0.4174 | 13.9739 | 0.3024 | -48.3071  |
| log_s_Enterobacter_asburiae     | IschemicStroke      | MR Egger                  | 15 | 1.0208 | 0.9425 | 1.1056 | 0.6211 | -0.0067 | 0.0174 | 0.7061 | 18.4337 | 0.1417 | -244.8747 |
| log_s_Enterobacter_asburiae     | IschemicStroke      | Weighted median           | 15 | 1.0078 | 0.9838 | 1.0323 | 0.5280 | -0.0067 | 0.0174 | 0.7061 | 18.4337 | 0.1417 | -244.8747 |
| log_s_Enterobacter_asburiae     | IschemicStroke      | Inverse variance weighted | 15 | 1.0054 | 0.9862 | 1.0251 | 0.5832 | -0.0067 | 0.0174 | 0.7061 | 18.4337 | 0.1417 | -244.8747 |
| log_s_Enterobacter_asburiae     | IschemicStroke      | Simple mode               | 15 | 1.0115 | 0.9704 | 1.0543 | 0.5986 | -0.0067 | 0.0174 | 0.7061 | 18.4337 | 0.1417 | -244.8747 |
| log_s_Enterobacter_asburiae     | IschemicStroke      | Weighted mode             | 15 | 1.0099 | 0.9715 | 1.0498 | 0.6260 | -0.0067 | 0.0174 | 0.7061 | 18.4337 | 0.1417 | -244.8747 |
| log_s_Enterobacter_asburiae     | LargeArteryStroke   | MR Egger                  | 15 | 0.9869 | 0.7728 | 1.2603 | 0.9174 | 0.0105  | 0.0532 | 0.8471 | 16.0366 | 0.2472 | -62.1881  |
| log_s_Enterobacter_asburiae     | LargeArteryStroke   | Weighted median           | 15 | 1.0337 | 0.9546 | 1.1193 | 0.4145 | 0.0105  | 0.0532 | 0.8471 | 16.0366 | 0.2472 | -62.1881  |
| log_s_Enterobacter_asburiae     | LargeArteryStroke   | Inverse variance weighted | 15 | 1.0106 | 0.9530 | 1.0717 | 0.7240 | 0.0105  | 0.0532 | 0.8471 | 16.0366 | 0.2472 | -62.1881  |
| log_s_Enterobacter_asburiae     | LargeArteryStroke   | Simple mode               | 15 | 1.0351 | 0.9075 | 1.1807 | 0.6153 | 0.0105  | 0.0532 | 0.8471 | 16.0366 | 0.2472 | -62.1881  |
| log_s_Enterobacter_asburiae     | LargeArteryStroke   | Weighted mode             | 15 | 1.0199 | 0.9000 | 1.1557 | 0.7624 | 0.0105  | 0.0532 | 0.8471 | 16.0366 | 0.2472 | -62.1881  |
| log_s_Enterobacter_asburiae     | SmallVesselStroke   | MR Egger                  | 15 | 0.9947 | 0.8686 | 1.1392 | 0.9403 | 0.0040  | 0.0295 | 0.8941 | 16.1929 | 0.2389 | -132.1861 |
| log_s_Enterobacter_asburiae     | SmallVesselStroke   | Weighted median           | 15 | 1.0029 | 0.9611 | 1.0466 | 0.8942 | 0.0040  | 0.0295 | 0.8941 | 16.1929 | 0.2389 | -132.1861 |
| log_s_Enterobacter_asburiae     | SmallVesselStroke   | Inverse variance weighted | 15 | 1.0038 | 0.9716 | 1.0371 | 0.8190 | 0.0040  | 0.0295 | 0.8941 | 16.1929 | 0.2389 | -132.1861 |
| log_s_Enterobacter_asburiae     | SmallVesselStroke   | Simple mode               | 15 | 0.9790 | 0.9191 | 1.0427 | 0.5195 | 0.0040  | 0.0295 | 0.8941 | 16.1929 | 0.2389 | -132.1861 |
| log_s_Enterobacter_asburiae     | SmallVesselStroke   | Weighted mode             | 15 | 1.0008 | 0.9431 | 1.0620 | 0.9805 | 0.0040  | 0.0295 | 0.8941 | 16.1929 | 0.2389 | -132.1861 |
| log_s_Enterobacter_asburiae     | Stroke              | MR Egger                  | 15 | 1.0118 | 0.9521 | 1.0752 | 0.7122 | -0.0025 | 0.0132 | 0.8525 | 14.1532 | 0.3631 | -293.9865 |
| log_s_Enterobacter_asburiae     | Stroke              | Weighted median           | 15 | 1.0031 | 0.9822 | 1.0245 | 0.7714 | -0.0025 | 0.0132 | 0.8525 | 14.1532 | 0.3631 | -293.9865 |
| log_s_Enterobacter_asburiae     | Stroke              | Inverse variance weighted | 15 | 1.0060 | 0.9916 | 1.0206 | 0.4158 | -0.0025 | 0.0132 | 0.8525 | 14.1532 | 0.3631 | -293.9865 |
| log_s_Enterobacter_asburiae     | Stroke              | Simple mode               | 15 | 1.0091 | 0.9722 | 1.0475 | 0.6406 | -0.0025 | 0.0132 | 0.8525 | 14.1532 | 0.3631 | -293.9865 |
| log_s_Enterobacter_asburiae     | Stroke              | Weighted mode             | 15 | 1.0062 | 0.9723 | 1.0413 | 0.7295 | -0.0025 | 0.0132 | 0.8525 | 14.1532 | 0.3631 | -293.9865 |
| log_s_Enterobacter_cancerogenus | CardioEmbolicStroke | MR Egger                  | 9  | 0.9909 | 0.6302 | 1.5581 | 0.9695 | 0.0168  | 0.0997 | 0.8706 | 2.7361  | 0.9083 | -387.6317 |
| log_s_Enterobacter_cancerogenus | CardioEmbolicStroke | Weighted median           | 9  | 1.0440 | 0.9320 | 1.1694 | 0.4574 | 0.0168  | 0.0997 | 0.8706 | 2.7361  | 0.9083 | -387.6317 |
| log_s_Enterobacter_cancerogenus | CardioEmbolicStroke | Inverse variance weighted | 9  | 1.0295 | 0.9427 | 1.1244 | 0.5172 | 0.0168  | 0.0997 | 0.8706 | 2.7361  | 0.9083 | -387.6317 |
| log_s_Enterobacter_cancerogenus | CardioEmbolicStroke | Simple mode               | 9  | 1.0802 | 0.8993 | 1.2975 | 0.4334 | 0.0168  | 0.0997 | 0.8706 | 2.7361  | 0.9083 | -387.6317 |
| log_s_Enterobacter_cancerogenus | CardioEmbolicStroke | Weighted mode             | 9  | 1.0813 | 0.9152 | 1.2774 | 0.3852 | 0.0168  | 0.0997 | 0.8706 | 2.7361  | 0.9083 | -387.6317 |
| log_s_Enterobacter_cancerogenus | IschemicStroke      | MR Egger                  | 10 | 0.9833 | 0.8748 | 1.1051 | 0.7842 | 0.0059  | 0.0263 | 0.8280 | 14.0417 | 0.0807 | -363.1046 |
| log_s_Enterobacter_cancerogenus | IschemicStroke      | Weighted median           | 10 | 0.9907 | 0.9629 | 1.0194 | 0.5232 | 0.0059  | 0.0263 | 0.8280 | 14.0417 | 0.0807 | -363.1046 |
| log_s_Enterobacter_cancerogenus | IschemicStroke      | Inverse variance weighted | 10 | 0.9962 | 0.9717 | 1.0213 | 0.7620 | 0.0059  | 0.0263 | 0.8280 | 14.0417 | 0.0807 | -363.1046 |
| log_s_Enterobacter_cancerogenus | IschemicStroke      | Simple mode               | 10 | 0.9918 | 0.9451 | 1.0408 | 0.7450 | 0.0059  | 0.0263 | 0.8280 | 14.0417 | 0.0807 | -363.1046 |
| log_s_Enterobacter_cancerogenus | IschemicStroke      | Weighted mode             | 10 | 0.9969 | 0.9557 | 1.0399 | 0.8880 | 0.0059  | 0.0263 | 0.8280 | 14.0417 | 0.0807 | -363.1046 |
| log_s_Enterobacter_cancerogenus | LargeArteryStroke   | MR Egger                  | 9  | 0.9700 | 0.6870 | 1.3694 | 0.8673 | 0.0077  | 0.0758 | 0.9218 | 7.0478  | 0.4239 | -309.0502 |
| log_s_Enterobacter_cancerogenus | LargeArteryStroke   | Weighted median           | 9  | 1.0197 | 0.9318 | 1.1158 | 0.6714 | 0.0077  | 0.0758 | 0.9218 | 7.0478  | 0.4239 | -309.0502 |
| log_s_Enterobacter_cancerogenus | LargeArteryStroke   | Inverse variance weighted | 9  | 0.9871 | 0.9240 | 1.0546 | 0.7012 | 0.0077  | 0.0758 | 0.9218 | 7.0478  | 0.4239 | -309.0502 |
| log_s_Enterobacter_cancerogenus | LargeArteryStroke   | Simple mode               | 9  | 1.0423 | 0.8998 | 1.2074 | 0.5960 | 0.0077  | 0.0758 | 0.9218 | 7.0478  | 0.4239 | -309.0502 |
| log_s_Enterobacter_cancerogenus | LargeArteryStroke   | Weighted mode             | 9  | 1.0411 | 0.9191 | 1.1793 | 0.5442 | 0.0077  | 0.0758 | 0.9218 | 7.0478  | 0.4239 | -309.0502 |
| log_s_Enterobacter_cancerogenus | SmallVesselStroke   | MR Egger                  | 10 | 1.0278 | 0.8734 | 1.2094 | 0.7500 | -0.0133 | 0.0366 | 0.7264 | 8.4445  | 0.3913 | -273.8068 |
| log_s_Enterobacter_cancerogenus | SmallVesselStroke   | Weighted median           | 10 | 1.0020 | 0.9523 | 1.0542 | 0.9393 | -0.0133 | 0.0366 | 0.7264 | 8.4445  | 0.3913 | -273.8068 |
| log_s_Enterobacter_cancerogenus | SmallVesselStroke   | Inverse variance weighted | 10 | 0.9981 | 0.9631 | 1.0344 | 0.9159 | -0.0133 | 0.0366 | 0.7264 | 8.4445  | 0.3913 | -273.8068 |
| log_s_Enterobacter_cancerogenus | SmallVesselStroke   | Simple mode               | 10 | 1.0051 | 0.9214 | 1.0963 | 0.9117 | -0.0133 | 0.0366 | 0.7264 | 8.4445  | 0.3913 | -273.8068 |
| log_s_Enterobacter_cancerogenus | SmallVesselStroke   | Weighted mode             | 10 | 0.9954 | 0.9120 | 1.0864 | 0.9199 | -0.0133 | 0.0366 | 0.7264 | 8.4445  | 0.3913 | -273.8068 |
| log_s_Enterobacter_cancerogenus | Stroke              | MR Egger                  | 10 | 0.9556 | 0.8656 | 1.0550 | 0.3948 | 0.0218  | 0.0224 | 0.3595 | 17.0257 | 0.0483 | -337.1924 |
| log_s_Enterobacter_cancerogenus | Stroke              | Weighted median           | 10 | 1.0055 | 0.9802 | 1.0315 | 0.6739 | 0.0218  | 0.0224 | 0.3595 | 17.0257 | 0.0483 | -337.1924 |
| log_s_Enterobacter_cancerogenus | Stroke              | Inverse variance weighted | 10 | 1.0023 | 0.9794 | 1.0258 | 0.8450 | 0.0218  | 0.0224 | 0.3595 | 17.0257 | 0.0483 | -337.1924 |
| log_s_Enterobacter_cancerogenus | Stroke              | Simple mode               | 10 | 1.0156 | 0.9668 | 1.0669 | 0.5521 | 0.0218  | 0.0224 | 0.3595 | 17.0257 | 0.0483 | -337.1924 |

|                                  |                     |                           |    |        |        |        |        |         |        |        |         |        |             |
|----------------------------------|---------------------|---------------------------|----|--------|--------|--------|--------|---------|--------|--------|---------|--------|-------------|
| log_s_Enterobacter_cancerogenus  | Stroke              | Weighted mode             | 10 | 1.0138 | 0.9674 | 1.0624 | 0.5802 | 0.0218  | 0.0224 | 0.3595 | 17.0257 | 0.0483 | -337.1924   |
| log_s_Escherichia_albertii       | CardioEmbolicStroke | MR Egger                  | 9  | 1.0061 | 0.5556 | 1.8221 | 0.9845 | -0.0191 | 0.1225 | 0.8806 | 5.9493  | 0.5457 | -503.7204   |
| log_s_Escherichia_albertii       | CardioEmbolicStroke | Weighted median           | 9  | 0.9741 | 0.8610 | 1.1021 | 0.6771 | -0.0191 | 0.1225 | 0.8806 | 5.9493  | 0.5457 | -503.7204   |
| log_s_Escherichia_albertii       | CardioEmbolicStroke | Inverse variance weighted | 9  | 0.9603 | 0.8754 | 1.0534 | 0.3909 | -0.0191 | 0.1225 | 0.8806 | 5.9493  | 0.5457 | -503.7204   |
| log_s_Escherichia_albertii       | CardioEmbolicStroke | Simple mode               | 9  | 0.9968 | 0.8294 | 1.1980 | 0.9734 | -0.0191 | 0.1225 | 0.8806 | 5.9493  | 0.5457 | -503.7204   |
| log_s_Escherichia_albertii       | CardioEmbolicStroke | Weighted mode             | 9  | 1.0011 | 0.8278 | 1.2107 | 0.9913 | -0.0191 | 0.1225 | 0.8806 | 5.9493  | 0.5457 | -503.7204   |
| log_s_Escherichia_albertii       | IschemicStroke      | MR Egger                  | 11 | 0.8897 | 0.7992 | 0.9904 | 0.0614 | 0.0444  | 0.0227 | 0.0827 | 18.4669 | 0.0476 | -420.2240   |
| log_s_Escherichia_albertii       | IschemicStroke      | Weighted median           | 11 | 0.9829 | 0.9559 | 1.0107 | 0.2266 | 0.0444  | 0.0227 | 0.0827 | 18.4669 | 0.0476 | -420.2240   |
| log_s_Escherichia_albertii       | IschemicStroke      | Inverse variance weighted | 11 | 0.9874 | 0.9615 | 1.0141 | 0.3519 | 0.0444  | 0.0227 | 0.0827 | 18.4669 | 0.0476 | -420.2240   |
| log_s_Escherichia_albertii       | IschemicStroke      | Simple mode               | 11 | 0.9741 | 0.9290 | 1.0214 | 0.3042 | 0.0444  | 0.0227 | 0.0827 | 18.4669 | 0.0476 | -420.2240   |
| log_s_Escherichia_albertii       | IschemicStroke      | Weighted mode             | 11 | 0.9724 | 0.9325 | 1.0141 | 0.2205 | 0.0444  | 0.0227 | 0.0827 | 18.4669 | 0.0476 | -420.2240   |
| log_s_Escherichia_albertii       | LargeArteryStroke   | MR Egger                  | 10 | 0.7727 | 0.5354 | 1.1154 | 0.2058 | 0.0826  | 0.0786 | 0.3241 | 13.6527 | 0.1352 | -98.9925    |
| log_s_Escherichia_albertii       | LargeArteryStroke   | Weighted median           | 10 | 0.9179 | 0.8390 | 1.0043 | 0.0618 | 0.0826  | 0.0786 | 0.3241 | 13.6527 | 0.1352 | -98.9925    |
| log_s_Escherichia_albertii       | LargeArteryStroke   | Inverse variance weighted | 10 | 0.9363 | 0.8637 | 1.0150 | 0.1097 | 0.0826  | 0.0786 | 0.3241 | 13.6527 | 0.1352 | -98.9925    |
| log_s_Escherichia_albertii       | LargeArteryStroke   | Simple mode               | 10 | 0.8837 | 0.7642 | 1.0218 | 0.1294 | 0.0826  | 0.0786 | 0.3241 | 13.6527 | 0.1352 | -98.9925    |
| log_s_Escherichia_albertii       | LargeArteryStroke   | Weighted mode             | 10 | 0.8860 | 0.7693 | 1.0204 | 0.1274 | 0.0826  | 0.0786 | 0.3241 | 13.6527 | 0.1352 | -98.9925    |
| log_s_Escherichia_albertii       | SmallVesselStroke   | MR Egger                  | 10 | 1.0098 | 0.8559 | 1.1913 | 0.9109 | -0.0043 | 0.0355 | 0.9063 | 6.9927  | 0.5374 | -463.5593   |
| log_s_Escherichia_albertii       | SmallVesselStroke   | Weighted median           | 10 | 1.0054 | 0.9575 | 1.0557 | 0.8278 | -0.0043 | 0.0355 | 0.9063 | 6.9927  | 0.5374 | -463.5593   |
| log_s_Escherichia_albertii       | SmallVesselStroke   | Inverse variance weighted | 10 | 0.9997 | 0.9640 | 1.0368 | 0.9891 | -0.0043 | 0.0355 | 0.9063 | 6.9927  | 0.5374 | -463.5593   |
| log_s_Escherichia_albertii       | SmallVesselStroke   | Simple mode               | 10 | 1.0437 | 0.9623 | 1.1321 | 0.3289 | -0.0043 | 0.0355 | 0.9063 | 6.9927  | 0.5374 | -463.5593   |
| log_s_Escherichia_albertii       | SmallVesselStroke   | Weighted mode             | 10 | 1.0419 | 0.9616 | 1.1289 | 0.3424 | -0.0043 | 0.0355 | 0.9063 | 6.9927  | 0.5374 | -463.5593   |
| log_s_Escherichia_albertii       | Stroke              | MR Egger                  | 11 | 0.9202 | 0.8530 | 0.9926 | 0.0599 | 0.0309  | 0.0160 | 0.0862 | 12.6419 | 0.2444 | -609.3669   |
| log_s_Escherichia_albertii       | Stroke              | Weighted median           | 11 | 0.9885 | 0.9658 | 1.0117 | 0.3268 | 0.0309  | 0.0160 | 0.0862 | 12.6419 | 0.2444 | -609.3669   |
| log_s_Escherichia_albertii       | Stroke              | Inverse variance weighted | 11 | 0.9895 | 0.9711 | 1.0083 | 0.2714 | 0.0309  | 0.0160 | 0.0862 | 12.6419 | 0.2444 | -609.3669   |
| log_s_Escherichia_albertii       | Stroke              | Simple mode               | 11 | 0.9901 | 0.9520 | 1.0297 | 0.6310 | 0.0309  | 0.0160 | 0.0862 | 12.6419 | 0.2444 | -609.3669   |
| log_s_Escherichia_albertii       | Stroke              | Weighted mode             | 11 | 0.9889 | 0.9524 | 1.0269 | 0.5748 | 0.0309  | 0.0160 | 0.0862 | 12.6419 | 0.2444 | -609.3669   |
| log_s_Eubacterium_cellulosolvens | CardioEmbolicStroke | MR Egger                  | 7  | 0.7089 | 0.2706 | 1.8569 | 0.5150 | 0.1615  | 0.1911 | 0.4367 | 7.0504  | 0.2169 | -7093.7494  |
| log_s_Eubacterium_cellulosolvens | CardioEmbolicStroke | Weighted median           | 7  | 1.0850 | 0.9413 | 1.2506 | 0.2606 | 0.1615  | 0.1911 | 0.4367 | 7.0504  | 0.2169 | -7093.7494  |
| log_s_Eubacterium_cellulosolvens | CardioEmbolicStroke | Inverse variance weighted | 7  | 1.0701 | 0.9493 | 1.2063 | 0.2679 | 0.1615  | 0.1911 | 0.4367 | 7.0504  | 0.2169 | -7093.7494  |
| log_s_Eubacterium_cellulosolvens | CardioEmbolicStroke | Simple mode               | 7  | 1.1494 | 0.8993 | 1.4689 | 0.3086 | 0.1615  | 0.1911 | 0.4367 | 7.0504  | 0.2169 | -7093.7494  |
| log_s_Eubacterium_cellulosolvens | CardioEmbolicStroke | Weighted mode             | 7  | 1.0914 | 0.8436 | 1.4121 | 0.5304 | 0.1615  | 0.1911 | 0.4367 | 7.0504  | 0.2169 | -7093.7494  |
| log_s_Eubacterium_cellulosolvens | IschemicStroke      | MR Egger                  | 7  | 1.1167 | 0.9147 | 1.3633 | 0.3276 | -0.0424 | 0.0396 | 0.3335 | 7.0588  | 0.3154 | -59927.6314 |
| log_s_Eubacterium_cellulosolvens | IschemicStroke      | Weighted median           | 7  | 1.0127 | 0.9810 | 1.0454 | 0.4376 | -0.0424 | 0.0396 | 0.3335 | 7.0588  | 0.3154 | -59927.6314 |
| log_s_Eubacterium_cellulosolvens | IschemicStroke      | Inverse variance weighted | 7  | 1.0024 | 0.9768 | 1.0286 | 0.8564 | -0.0424 | 0.0396 | 0.3335 | 7.0588  | 0.3154 | -59927.6314 |
| log_s_Eubacterium_cellulosolvens | IschemicStroke      | Simple mode               | 7  | 1.0195 | 0.9764 | 1.0645 | 0.4155 | -0.0424 | 0.0396 | 0.3335 | 7.0588  | 0.3154 | -59927.6314 |
| log_s_Eubacterium_cellulosolvens | IschemicStroke      | Weighted mode             | 7  | 1.0206 | 0.9807 | 1.0620 | 0.3556 | -0.0424 | 0.0396 | 0.3335 | 7.0588  | 0.3154 | -59927.6314 |
| log_s_Eubacterium_cellulosolvens | LargeArteryStroke   | MR Egger                  | 7  | 1.0186 | 0.5541 | 1.8727 | 0.9549 | -0.0267 | 0.1207 | 0.8336 | 2.0534  | 0.8417 | -19506.5743 |
| log_s_Eubacterium_cellulosolvens | LargeArteryStroke   | Weighted median           | 7  | 0.9550 | 0.8709 | 1.0473 | 0.3282 | -0.0267 | 0.1207 | 0.8336 | 2.0534  | 0.8417 | -19506.5743 |
| log_s_Eubacterium_cellulosolvens | LargeArteryStroke   | Inverse variance weighted | 7  | 0.9515 | 0.8805 | 1.0281 | 0.2084 | -0.0267 | 0.1207 | 0.8336 | 2.0534  | 0.8417 | -19506.5743 |
| log_s_Eubacterium_cellulosolvens | LargeArteryStroke   | Simple mode               | 7  | 0.9567 | 0.8306 | 1.1021 | 0.5623 | -0.0267 | 0.1207 | 0.8336 | 2.0534  | 0.8417 | -19506.5743 |
| log_s_Eubacterium_cellulosolvens | LargeArteryStroke   | Weighted mode             | 7  | 0.9567 | 0.8348 | 1.0965 | 0.5483 | -0.0267 | 0.1207 | 0.8336 | 2.0534  | 0.8417 | -19506.5743 |
| log_s_Eubacterium_cellulosolvens | SmallVesselStroke   | MR Egger                  | 7  | 1.1183 | 0.7986 | 1.5660 | 0.5438 | -0.0439 | 0.0668 | 0.5397 | 4.9065  | 0.4274 | -32931.0742 |
| log_s_Eubacterium_cellulosolvens | SmallVesselStroke   | Weighted median           | 7  | 1.0209 | 0.9687 | 1.0758 | 0.4399 | -0.0439 | 0.0668 | 0.5397 | 4.9065  | 0.4274 | -32931.0742 |
| log_s_Eubacterium_cellulosolvens | SmallVesselStroke   | Inverse variance weighted | 7  | 0.9997 | 0.9577 | 1.0436 | 0.9902 | -0.0439 | 0.0668 | 0.5397 | 4.9065  | 0.4274 | -32931.0742 |
| log_s_Eubacterium_cellulosolvens | SmallVesselStroke   | Simple mode               | 7  | 1.0312 | 0.9438 | 1.1268 | 0.5217 | -0.0439 | 0.0668 | 0.5397 | 4.9065  | 0.4274 | -32931.0742 |
| log_s_Eubacterium_cellulosolvens | SmallVesselStroke   | Weighted mode             | 7  | 1.0341 | 0.9561 | 1.1184 | 0.4344 | -0.0439 | 0.0668 | 0.5397 | 4.9065  | 0.4274 | -32931.0742 |
| log_s_Eubacterium_cellulosolvens | Stroke              | MR Egger                  | 8  | 1.0325 | 0.9366 | 1.1383 | 0.5439 | -0.0154 | 0.0203 | 0.4789 | 11.0509 | 0.0868 | -533.8571   |
| log_s_Eubacterium_cellulosolvens | Stroke              | Weighted median           | 8  | 1.0048 | 0.9791 | 1.0311 | 0.7196 | -0.0154 | 0.0203 | 0.4789 | 11.0509 | 0.0868 | -533.8571   |
| log_s_Eubacterium_cellulosolvens | Stroke              | Inverse variance weighted | 8  | 0.9958 | 0.9710 | 1.0213 | 0.7447 | -0.0154 | 0.0203 | 0.4789 | 11.0509 | 0.0868 | -533.8571   |
| log_s_Eubacterium_cellulosolvens | Stroke              | Simple mode               | 8  | 1.0056 | 0.9701 | 1.0424 | 0.7684 | -0.0154 | 0.0203 | 0.4789 | 11.0509 | 0.0868 | -533.8571   |
| log_s_Eubacterium_cellulosolvens | Stroke              | Weighted mode             | 8  | 1.0083 | 0.9712 | 1.0469 | 0.6788 | -0.0154 | 0.0203 | 0.4789 | 11.0509 | 0.0868 | -533.8571   |
| log_s_Filifactor_alocis          | CardioEmbolicStroke | MR Egger                  | 10 | 0.9555 | 0.6502 | 1.4041 | 0.8224 | 0.0351  | 0.0896 | 0.7057 | 11.4245 | 0.1788 | -73.9215    |
| log_s_Filifactor_alocis          | CardioEmbolicStroke | Weighted median           | 10 | 0.9748 | 0.8629 | 1.1012 | 0.6815 | 0.0351  | 0.0896 | 0.7057 | 11.4245 | 0.1788 | -73.9215    |

|                                   |                     |                           |    |        |        |        |        |         |        |        |         |        |           |
|-----------------------------------|---------------------|---------------------------|----|--------|--------|--------|--------|---------|--------|--------|---------|--------|-----------|
| log_s_Filifactor_alocis           | CardioEmbolicStroke | Inverse variance weighted | 10 | 1.0291 | 0.9356 | 1.1320 | 0.5549 | 0.0351  | 0.0896 | 0.7057 | 11.4245 | 0.1788 | -73.9215  |
| log_s_Filifactor_alocis           | CardioEmbolicStroke | Simple mode               | 10 | 0.9275 | 0.7433 | 1.1574 | 0.5219 | 0.0351  | 0.0896 | 0.7057 | 11.4245 | 0.1788 | -73.9215  |
| log_s_Filifactor_alocis           | CardioEmbolicStroke | Weighted mode             | 10 | 0.9384 | 0.7568 | 1.1636 | 0.5765 | 0.0351  | 0.0896 | 0.7057 | 11.4245 | 0.1788 | -73.9215  |
| log_s_Filifactor_alocis           | IschemicStroke      | MR Egger                  | 10 | 1.0213 | 0.9359 | 1.1146 | 0.6483 | -0.0048 | 0.0203 | 0.8179 | 10.9672 | 0.2036 | -493.7877 |
| log_s_Filifactor_alocis           | IschemicStroke      | Weighted median           | 10 | 0.9988 | 0.9724 | 1.0260 | 0.9323 | -0.0048 | 0.0203 | 0.8179 | 10.9672 | 0.2036 | -493.7877 |
| log_s_Filifactor_alocis           | IschemicStroke      | Inverse variance weighted | 10 | 1.0109 | 0.9895 | 1.0328 | 0.3194 | -0.0048 | 0.0203 | 0.8179 | 10.9672 | 0.2036 | -493.7877 |
| log_s_Filifactor_alocis           | IschemicStroke      | Simple mode               | 10 | 0.9929 | 0.9559 | 1.0313 | 0.7210 | -0.0048 | 0.0203 | 0.8179 | 10.9672 | 0.2036 | -493.7877 |
| log_s_Filifactor_alocis           | IschemicStroke      | Weighted mode             | 10 | 0.9947 | 0.9634 | 1.0269 | 0.7498 | -0.0048 | 0.0203 | 0.8179 | 10.9672 | 0.2036 | -493.7877 |
| log_s_Filifactor_alocis           | LargeArteryStroke   | MR Egger                  | 10 | 0.7985 | 0.6267 | 1.0175 | 0.1063 | 0.1086  | 0.0563 | 0.0899 | 7.6660  | 0.5681 | -141.3659 |
| log_s_Filifactor_alocis           | LargeArteryStroke   | Weighted median           | 10 | 0.9943 | 0.9147 | 1.0808 | 0.8931 | 0.1086  | 0.0563 | 0.0899 | 7.6660  | 0.5681 | -141.3659 |
| log_s_Filifactor_alocis           | LargeArteryStroke   | Inverse variance weighted | 10 | 1.0053 | 0.9441 | 1.0705 | 0.8685 | 0.1086  | 0.0563 | 0.0899 | 7.6660  | 0.5681 | -141.3659 |
| log_s_Filifactor_alocis           | LargeArteryStroke   | Simple mode               | 10 | 0.9846 | 0.8596 | 1.1277 | 0.8273 | 0.1086  | 0.0563 | 0.0899 | 7.6660  | 0.5681 | -141.3659 |
| log_s_Filifactor_alocis           | LargeArteryStroke   | Weighted mode             | 10 | 0.9743 | 0.8619 | 1.1012 | 0.6862 | 0.1086  | 0.0563 | 0.0899 | 7.6660  | 0.5681 | -141.3659 |
| log_s_Filifactor_alocis           | SmallVesselStroke   | MR Egger                  | 10 | 1.1424 | 0.9522 | 1.3705 | 0.1898 | -0.0598 | 0.0424 | 0.1965 | 18.5616 | 0.0292 | -196.8601 |
| log_s_Filifactor_alocis           | SmallVesselStroke   | Weighted median           | 10 | 0.9967 | 0.9491 | 1.0467 | 0.8956 | -0.0598 | 0.0424 | 0.1965 | 18.5616 | 0.0292 | -196.8601 |
| log_s_Filifactor_alocis           | SmallVesselStroke   | Inverse variance weighted | 10 | 1.0067 | 0.9578 | 1.0581 | 0.7925 | -0.0598 | 0.0424 | 0.1965 | 18.5616 | 0.0292 | -196.8601 |
| log_s_Filifactor_alocis           | SmallVesselStroke   | Simple mode               | 10 | 1.0048 | 0.9278 | 1.0882 | 0.9089 | -0.0598 | 0.0424 | 0.1965 | 18.5616 | 0.0292 | -196.8601 |
| log_s_Filifactor_alocis           | SmallVesselStroke   | Weighted mode             | 10 | 1.0031 | 0.9362 | 1.0748 | 0.9317 | -0.0598 | 0.0424 | 0.1965 | 18.5616 | 0.0292 | -196.8601 |
| log_s_Filifactor_alocis           | Stroke              | MR Egger                  | 11 | 1.0229 | 0.9639 | 1.0856 | 0.4744 | -0.0051 | 0.0139 | 0.7224 | 8.4464  | 0.4899 | -316.9496 |
| log_s_Filifactor_alocis           | Stroke              | Weighted median           | 11 | 1.0073 | 0.9842 | 1.0309 | 0.5390 | -0.0051 | 0.0139 | 0.7224 | 8.4464  | 0.4899 | -316.9496 |
| log_s_Filifactor_alocis           | Stroke              | Inverse variance weighted | 11 | 1.0120 | 0.9955 | 1.0288 | 0.1537 | -0.0051 | 0.0139 | 0.7224 | 8.4464  | 0.4899 | -316.9496 |
| log_s_Filifactor_alocis           | Stroke              | Simple mode               | 11 | 1.0061 | 0.9715 | 1.0420 | 0.7393 | -0.0051 | 0.0139 | 0.7224 | 8.4464  | 0.4899 | -316.9496 |
| log_s_Filifactor_alocis           | Stroke              | Weighted mode             | 11 | 1.0041 | 0.9710 | 1.0385 | 0.8140 | -0.0051 | 0.0139 | 0.7224 | 8.4464  | 0.4899 | -316.9496 |
| log_s_Fusobacterium_nucleatum     | CardioEmbolicStroke | MR Egger                  | 6  | 0.8967 | 0.6965 | 1.1546 | 0.4457 | 0.0679  | 0.0723 | 0.4010 | 2.9475  | 0.5666 | -98.7755  |
| log_s_Fusobacterium_nucleatum     | CardioEmbolicStroke | Weighted median           | 6  | 1.0089 | 0.8783 | 1.1589 | 0.9004 | 0.0679  | 0.0723 | 0.4010 | 2.9475  | 0.5666 | -98.7755  |
| log_s_Fusobacterium_nucleatum     | CardioEmbolicStroke | Inverse variance weighted | 6  | 1.0013 | 0.9021 | 1.1114 | 0.9806 | 0.0679  | 0.0723 | 0.4010 | 2.9475  | 0.5666 | -98.7755  |
| log_s_Fusobacterium_nucleatum     | CardioEmbolicStroke | Simple mode               | 6  | 0.9289 | 0.7656 | 1.1270 | 0.4882 | 0.0679  | 0.0723 | 0.4010 | 2.9475  | 0.5666 | -98.7755  |
| log_s_Fusobacterium_nucleatum     | CardioEmbolicStroke | Weighted mode             | 6  | 1.0269 | 0.8754 | 1.2047 | 0.7573 | 0.0679  | 0.0723 | 0.4010 | 2.9475  | 0.5666 | -98.7755  |
| log_s_Fusobacterium_nucleatum     | IschemicStroke      | MR Egger                  | 8  | 0.9676 | 0.8847 | 1.0583 | 0.4981 | 0.0108  | 0.0267 | 0.6998 | 17.0391 | 0.0091 | -72.0260  |
| log_s_Fusobacterium_nucleatum     | IschemicStroke      | Weighted median           | 8  | 0.9768 | 0.9443 | 1.0105 | 0.1754 | 0.0108  | 0.0267 | 0.6998 | 17.0391 | 0.0091 | -72.0260  |
| log_s_Fusobacterium_nucleatum     | IschemicStroke      | Inverse variance weighted | 8  | 0.9839 | 0.9495 | 1.0197 | 0.3732 | 0.0108  | 0.0267 | 0.6998 | 17.0391 | 0.0091 | -72.0260  |
| log_s_Fusobacterium_nucleatum     | IschemicStroke      | Simple mode               | 8  | 0.9623 | 0.9011 | 1.0277 | 0.2896 | 0.0108  | 0.0267 | 0.6998 | 17.0391 | 0.0091 | -72.0260  |
| log_s_Fusobacterium_nucleatum     | IschemicStroke      | Weighted mode             | 8  | 0.9705 | 0.9294 | 1.0134 | 0.2170 | 0.0108  | 0.0267 | 0.6998 | 17.0391 | 0.0091 | -72.0260  |
| log_s_Fusobacterium_nucleatum     | LargeArteryStroke   | MR Egger                  | 7  | 0.9083 | 0.7346 | 1.1229 | 0.4147 | 0.0588  | 0.0625 | 0.3897 | 8.3412  | 0.2142 | -49.4128  |
| log_s_Fusobacterium_nucleatum     | LargeArteryStroke   | Weighted median           | 7  | 0.9896 | 0.8921 | 1.0978 | 0.8437 | 0.0588  | 0.0625 | 0.3897 | 8.3412  | 0.2142 | -49.4128  |
| log_s_Fusobacterium_nucleatum     | LargeArteryStroke   | Inverse variance weighted | 7  | 0.9963 | 0.9121 | 1.0882 | 0.9336 | 0.0588  | 0.0625 | 0.3897 | 8.3412  | 0.2142 | -49.4128  |
| log_s_Fusobacterium_nucleatum     | LargeArteryStroke   | Simple mode               | 7  | 0.9669 | 0.8409 | 1.1117 | 0.6532 | 0.0588  | 0.0625 | 0.3897 | 8.3412  | 0.2142 | -49.4128  |
| log_s_Fusobacterium_nucleatum     | LargeArteryStroke   | Weighted mode             | 7  | 0.9921 | 0.8853 | 1.1119 | 0.8964 | 0.0588  | 0.0625 | 0.3897 | 8.3412  | 0.2142 | -49.4128  |
| log_s_Fusobacterium_nucleatum     | SmallVesselStroke   | MR Egger                  | 7  | 0.9484 | 0.8333 | 1.0794 | 0.4584 | 0.0063  | 0.0382 | 0.8761 | 8.8054  | 0.1171 | -62.9656  |
| log_s_Fusobacterium_nucleatum     | SmallVesselStroke   | Weighted median           | 7  | 0.9363 | 0.8844 | 0.9913 | 0.0237 | 0.0063  | 0.0382 | 0.8761 | 8.8054  | 0.1171 | -62.9656  |
| log_s_Fusobacterium_nucleatum     | SmallVesselStroke   | Inverse variance weighted | 7  | 0.9577 | 0.9112 | 1.0066 | 0.0892 | 0.0063  | 0.0382 | 0.8761 | 8.8054  | 0.1171 | -62.9656  |
| log_s_Fusobacterium_nucleatum     | SmallVesselStroke   | Simple mode               | 7  | 0.9236 | 0.8485 | 1.0053 | 0.1156 | 0.0063  | 0.0382 | 0.8761 | 8.8054  | 0.1171 | -62.9656  |
| log_s_Fusobacterium_nucleatum     | SmallVesselStroke   | Weighted mode             | 7  | 0.9290 | 0.8689 | 0.9933 | 0.0744 | 0.0063  | 0.0382 | 0.8761 | 8.8054  | 0.1171 | -62.9656  |
| log_s_Fusobacterium_nucleatum     | Stroke              | MR Egger                  | 9  | 0.9971 | 0.9451 | 1.0519 | 0.9175 | -0.0004 | 0.0162 | 0.9831 | 10.3006 | 0.1722 | -144.2299 |
| log_s_Fusobacterium_nucleatum     | Stroke              | Weighted median           | 9  | 0.9888 | 0.9635 | 1.0146 | 0.3912 | -0.0004 | 0.0162 | 0.9831 | 10.3006 | 0.1722 | -144.2299 |
| log_s_Fusobacterium_nucleatum     | Stroke              | Inverse variance weighted | 9  | 0.9965 | 0.9757 | 1.0178 | 0.7475 | -0.0004 | 0.0162 | 0.9831 | 10.3006 | 0.1722 | -144.2299 |
| log_s_Fusobacterium_nucleatum     | Stroke              | Simple mode               | 9  | 0.9831 | 0.9357 | 1.0330 | 0.5192 | -0.0004 | 0.0162 | 0.9831 | 10.3006 | 0.1722 | -144.2299 |
| log_s_Fusobacterium_nucleatum     | Stroke              | Weighted mode             | 9  | 0.9760 | 0.9447 | 1.0084 | 0.1835 | -0.0004 | 0.0162 | 0.9831 | 10.3006 | 0.1722 | -144.2299 |
| log_s_Fusobacterium_periodonticum | CardioEmbolicStroke | MR Egger                  | 9  | 0.7788 | 0.3212 | 1.8881 | 0.5973 | 0.0641  | 0.1868 | 0.7417 | 10.4971 | 0.1621 | -182.0900 |
| log_s_Fusobacterium_periodonticum | CardioEmbolicStroke | Weighted median           | 9  | 0.9949 | 0.8671 | 1.1414 | 0.9414 | 0.0641  | 0.1868 | 0.7417 | 10.4971 | 0.1621 | -182.0900 |
| log_s_Fusobacterium_periodonticum | CardioEmbolicStroke | Inverse variance weighted | 9  | 0.9080 | 0.8085 | 1.0197 | 0.1029 | 0.0641  | 0.1868 | 0.7417 | 10.4971 | 0.1621 | -182.0900 |
| log_s_Fusobacterium_periodonticum | CardioEmbolicStroke | Simple mode               | 9  | 1.0569 | 0.8131 | 1.3739 | 0.6901 | 0.0641  | 0.1868 | 0.7417 | 10.4971 | 0.1621 | -182.0900 |
| log_s_Fusobacterium_periodonticum | CardioEmbolicStroke | Weighted mode             | 9  | 1.0531 | 0.8245 | 1.3450 | 0.6896 | 0.0641  | 0.1868 | 0.7417 | 10.4971 | 0.1621 | -182.0900 |

|                                   |                     |                           |    |        |        |        |        |         |        |        |         |        |             |
|-----------------------------------|---------------------|---------------------------|----|--------|--------|--------|--------|---------|--------|--------|---------|--------|-------------|
| log_s_Fusobacterium_periodonticum | IschemicStroke      | MR Egger                  | 10 | 0.9677 | 0.8520 | 1.0991 | 0.6267 | 0.0178  | 0.0272 | 0.5320 | 7.9603  | 0.4374 | -491.4803   |
| log_s_Fusobacterium_periodonticum | IschemicStroke      | Weighted median           | 10 | 1.0096 | 0.9788 | 1.0414 | 0.5456 | 0.0178  | 0.0272 | 0.5320 | 7.9603  | 0.4374 | -491.4803   |
| log_s_Fusobacterium_periodonticum | IschemicStroke      | Inverse variance weighted | 10 | 1.0089 | 0.9860 | 1.0324 | 0.4482 | 0.0178  | 0.0272 | 0.5320 | 7.9603  | 0.4374 | -491.4803   |
| log_s_Fusobacterium_periodonticum | IschemicStroke      | Simple mode               | 10 | 1.0040 | 0.9548 | 1.0559 | 0.8787 | 0.0178  | 0.0272 | 0.5320 | 7.9603  | 0.4374 | -491.4803   |
| log_s_Fusobacterium_periodonticum | IschemicStroke      | Weighted mode             | 10 | 1.0078 | 0.9576 | 1.0607 | 0.7728 | 0.0178  | 0.0272 | 0.5320 | 7.9603  | 0.4374 | -491.4803   |
| log_s_Fusobacterium_periodonticum | LargeArteryStroke   | MR Egger                  | 9  | 0.6371 | 0.3601 | 1.1271 | 0.1653 | 0.1877  | 0.1200 | 0.1617 | 10.2042 | 0.2510 | -304.0933   |
| log_s_Fusobacterium_periodonticum | LargeArteryStroke   | Weighted median           | 9  | 1.0184 | 0.9141 | 1.1345 | 0.7410 | 0.1877  | 0.1200 | 0.1617 | 10.2042 | 0.2510 | -304.0933   |
| log_s_Fusobacterium_periodonticum | LargeArteryStroke   | Inverse variance weighted | 9  | 1.0001 | 0.9179 | 1.0897 | 0.9976 | 0.1877  | 0.1200 | 0.1617 | 10.2042 | 0.2510 | -304.0933   |
| log_s_Fusobacterium_periodonticum | LargeArteryStroke   | Simple mode               | 9  | 1.0695 | 0.8823 | 1.2963 | 0.5131 | 0.1877  | 0.1200 | 0.1617 | 10.2042 | 0.2510 | -304.0933   |
| log_s_Fusobacterium_periodonticum | LargeArteryStroke   | Weighted mode             | 9  | 1.0713 | 0.8962 | 1.2805 | 0.4712 | 0.1877  | 0.1200 | 0.1617 | 10.2042 | 0.2510 | -304.0933   |
| log_s_Fusobacterium_periodonticum | SmallVesselStroke   | MR Egger                  | 9  | 0.9369 | 0.6852 | 1.2811 | 0.6953 | 0.0215  | 0.0658 | 0.7534 | 7.2910  | 0.3992 | -1045.4561  |
| log_s_Fusobacterium_periodonticum | SmallVesselStroke   | Weighted median           | 9  | 0.9688 | 0.9164 | 1.0242 | 0.2641 | 0.0215  | 0.0658 | 0.7534 | 7.2910  | 0.3992 | -1045.4561  |
| log_s_Fusobacterium_periodonticum | SmallVesselStroke   | Inverse variance weighted | 9  | 0.9866 | 0.9457 | 1.0292 | 0.5309 | 0.0215  | 0.0658 | 0.7534 | 7.2910  | 0.3992 | -1045.4561  |
| log_s_Fusobacterium_periodonticum | SmallVesselStroke   | Simple mode               | 9  | 0.9566 | 0.8776 | 1.0427 | 0.3427 | 0.0215  | 0.0658 | 0.7534 | 7.2910  | 0.3992 | -1045.4561  |
| log_s_Fusobacterium_periodonticum | SmallVesselStroke   | Weighted mode             | 9  | 0.9573 | 0.8772 | 1.0448 | 0.3568 | 0.0215  | 0.0658 | 0.7534 | 7.2910  | 0.3992 | -1045.4561  |
| log_s_Fusobacterium_periodonticum | Stroke              | MR Egger                  | 10 | 0.9752 | 0.8767 | 1.0849 | 0.6569 | 0.0055  | 0.0229 | 0.8172 | 8.3432  | 0.4007 | -530.5328   |
| log_s_Fusobacterium_periodonticum | Stroke              | Weighted median           | 10 | 0.9936 | 0.9664 | 1.0216 | 0.6502 | 0.0055  | 0.0229 | 0.8172 | 8.3432  | 0.4007 | -530.5328   |
| log_s_Fusobacterium_periodonticum | Stroke              | Inverse variance weighted | 10 | 0.9878 | 0.9689 | 1.0070 | 0.2103 | 0.0055  | 0.0229 | 0.8172 | 8.3432  | 0.4007 | -530.5328   |
| log_s_Fusobacterium_periodonticum | Stroke              | Simple mode               | 10 | 1.0116 | 0.9617 | 1.0640 | 0.6660 | 0.0055  | 0.0229 | 0.8172 | 8.3432  | 0.4007 | -530.5328   |
| log_s_Fusobacterium_periodonticum | Stroke              | Weighted mode             | 10 | 1.0116 | 0.9636 | 1.0619 | 0.6531 | 0.0055  | 0.0229 | 0.8172 | 8.3432  | 0.4007 | -530.5328   |
| log_s_Fusobacterium_ulcerans      | CardioEmbolicStroke | MR Egger                  | 5  | 1.3415 | 0.6371 | 2.8248 | 0.4957 | -0.1338 | 0.1666 | 0.4807 | 3.4857  | 0.3226 | -11843.2903 |
| log_s_Fusobacterium_ulcerans      | CardioEmbolicStroke | Weighted median           | 5  | 1.0410 | 0.9011 | 1.2026 | 0.5852 | -0.1338 | 0.1666 | 0.4807 | 3.4857  | 0.3226 | -11843.2903 |
| log_s_Fusobacterium_ulcerans      | CardioEmbolicStroke | Inverse variance weighted | 5  | 0.9934 | 0.8776 | 1.1245 | 0.9168 | -0.1338 | 0.1666 | 0.4807 | 3.4857  | 0.3226 | -11843.2903 |
| log_s_Fusobacterium_ulcerans      | CardioEmbolicStroke | Simple mode               | 5  | 1.0442 | 0.8565 | 1.2731 | 0.6910 | -0.1338 | 0.1666 | 0.4807 | 3.4857  | 0.3226 | -11843.2903 |
| log_s_Fusobacterium_ulcerans      | CardioEmbolicStroke | Weighted mode             | 5  | 1.0516 | 0.8705 | 1.2704 | 0.6292 | -0.1338 | 0.1666 | 0.4807 | 3.4857  | 0.3226 | -11843.2903 |
| log_s_Fusobacterium_ulcerans      | IschemicStroke      | MR Egger                  | 7  | 1.1024 | 0.9911 | 1.2261 | 0.1324 | -0.0531 | 0.0252 | 0.0887 | 9.1053  | 0.1677 | -668.0409   |
| log_s_Fusobacterium_ulcerans      | IschemicStroke      | Weighted median           | 7  | 1.0149 | 0.9791 | 1.0520 | 0.4200 | -0.0531 | 0.0252 | 0.0887 | 9.1053  | 0.1677 | -668.0409   |
| log_s_Fusobacterium_ulcerans      | IschemicStroke      | Inverse variance weighted | 7  | 0.9865 | 0.9558 | 1.0181 | 0.3977 | -0.0531 | 0.0252 | 0.0887 | 9.1053  | 0.1677 | -668.0409   |
| log_s_Fusobacterium_ulcerans      | IschemicStroke      | Simple mode               | 7  | 1.0188 | 0.9558 | 1.0861 | 0.5880 | -0.0531 | 0.0252 | 0.0887 | 9.1053  | 0.1677 | -668.0409   |
| log_s_Fusobacterium_ulcerans      | IschemicStroke      | Weighted mode             | 7  | 1.0207 | 0.9629 | 1.0819 | 0.5168 | -0.0531 | 0.0252 | 0.0887 | 9.1053  | 0.1677 | -668.0409   |
| log_s_Fusobacterium_ulcerans      | LargeArteryStroke   | MR Egger                  | 6  | 1.1016 | 0.6730 | 1.8031 | 0.7200 | -0.0263 | 0.1151 | 0.8303 | 7.1670  | 0.1273 | -300.4940   |
| log_s_Fusobacterium_ulcerans      | LargeArteryStroke   | Weighted median           | 6  | 1.0211 | 0.9056 | 1.1514 | 0.7333 | -0.0263 | 0.1151 | 0.8303 | 7.1670  | 0.1273 | -300.4940   |
| log_s_Fusobacterium_ulcerans      | LargeArteryStroke   | Inverse variance weighted | 6  | 1.0416 | 0.9411 | 1.1528 | 0.4313 | -0.0263 | 0.1151 | 0.8303 | 7.1670  | 0.1273 | -300.4940   |
| log_s_Fusobacterium_ulcerans      | LargeArteryStroke   | Simple mode               | 6  | 0.9830 | 0.8089 | 1.1945 | 0.8697 | -0.0263 | 0.1151 | 0.8303 | 7.1670  | 0.1273 | -300.4940   |
| log_s_Fusobacterium_ulcerans      | LargeArteryStroke   | Weighted mode             | 6  | 1.0024 | 0.8398 | 1.1965 | 0.9797 | -0.0263 | 0.1151 | 0.8303 | 7.1670  | 0.1273 | -300.4940   |
| log_s_Fusobacterium_ulcerans      | SmallVesselStroke   | MR Egger                  | 7  | 1.0466 | 0.8631 | 1.2691 | 0.6628 | -0.0362 | 0.0455 | 0.4624 | 1.2873  | 0.9724 | -567.6813   |
| log_s_Fusobacterium_ulcerans      | SmallVesselStroke   | Weighted median           | 7  | 0.9601 | 0.9070 | 1.0163 | 0.1609 | -0.0362 | 0.0455 | 0.4624 | 1.2873  | 0.9724 | -567.6813   |
| log_s_Fusobacterium_ulcerans      | SmallVesselStroke   | Inverse variance weighted | 7  | 0.9700 | 0.9262 | 1.0160 | 0.1977 | -0.0362 | 0.0455 | 0.4624 | 1.2873  | 0.9724 | -567.6813   |
| log_s_Fusobacterium_ulcerans      | SmallVesselStroke   | Simple mode               | 7  | 0.9570 | 0.8815 | 1.0390 | 0.3353 | -0.0362 | 0.0455 | 0.4624 | 1.2873  | 0.9724 | -567.6813   |
| log_s_Fusobacterium_ulcerans      | SmallVesselStroke   | Weighted mode             | 7  | 0.9590 | 0.8907 | 1.0325 | 0.3089 | -0.0362 | 0.0455 | 0.4624 | 1.2873  | 0.9724 | -567.6813   |
| log_s_Fusobacterium_ulcerans      | Stroke              | MR Egger                  | 7  | 1.0405 | 0.9528 | 1.1362 | 0.4176 | -0.0244 | 0.0210 | 0.2974 | 5.1344  | 0.5267 | -1088.1216  |
| log_s_Fusobacterium_ulcerans      | Stroke              | Weighted median           | 7  | 0.9910 | 0.9630 | 1.0198 | 0.5366 | -0.0244 | 0.0210 | 0.2974 | 5.1344  | 0.5267 | -1088.1216  |
| log_s_Fusobacterium_ulcerans      | Stroke              | Inverse variance weighted | 7  | 0.9891 | 0.9677 | 1.0110 | 0.3281 | -0.0244 | 0.0210 | 0.2974 | 5.1344  | 0.5267 | -1088.1216  |
| log_s_Fusobacterium_ulcerans      | Stroke              | Simple mode               | 7  | 0.9969 | 0.9518 | 1.0442 | 0.9007 | -0.0244 | 0.0210 | 0.2974 | 5.1344  | 0.5267 | -1088.1216  |
| log_s_Fusobacterium_ulcerans      | Stroke              | Weighted mode             | 7  | 1.0043 | 0.9599 | 1.0508 | 0.8573 | -0.0244 | 0.0210 | 0.2974 | 5.1344  | 0.5267 | -1088.1216  |
| log_s_Fusobacterium_varium        | CardioEmbolicStroke | MR Egger                  | 13 | 1.2209 | 0.9162 | 1.6269 | 0.2003 | -0.0591 | 0.0651 | 0.3837 | 8.4336  | 0.6740 | -37.5059    |
| log_s_Fusobacterium_varium        | CardioEmbolicStroke | Weighted median           | 13 | 1.1023 | 0.9978 | 1.2177 | 0.0552 | -0.0591 | 0.0651 | 0.3837 | 8.4336  | 0.6740 | -37.5059    |
| log_s_Fusobacterium_varium        | CardioEmbolicStroke | Inverse variance weighted | 13 | 1.0737 | 0.9977 | 1.1554 | 0.0575 | -0.0591 | 0.0651 | 0.3837 | 8.4336  | 0.6740 | -37.5059    |
| log_s_Fusobacterium_varium        | CardioEmbolicStroke | Simple mode               | 13 | 1.1561 | 0.9725 | 1.3743 | 0.1261 | -0.0591 | 0.0651 | 0.3837 | 8.4336  | 0.6740 | -37.5059    |
| log_s_Fusobacterium_varium        | CardioEmbolicStroke | Weighted mode             | 13 | 1.1529 | 0.9548 | 1.3920 | 0.1648 | -0.0591 | 0.0651 | 0.3837 | 8.4336  | 0.6740 | -37.5059    |
| log_s_Fusobacterium_varium        | IschemicStroke      | MR Egger                  | 14 | 0.9643 | 0.8922 | 1.0423 | 0.3776 | 0.0167  | 0.0178 | 0.3655 | 20.0564 | 0.0938 | -158.3069   |
| log_s_Fusobacterium_varium        | IschemicStroke      | Weighted median           | 14 | 1.0105 | 0.9854 | 1.0363 | 0.4155 | 0.0167  | 0.0178 | 0.3655 | 20.0564 | 0.0938 | -158.3069   |
| log_s_Fusobacterium_varium        | IschemicStroke      | Inverse variance weighted | 14 | 0.9996 | 0.9791 | 1.0206 | 0.9701 | 0.0167  | 0.0178 | 0.3655 | 20.0564 | 0.0938 | -158.3069   |

|                                |                     |                           |    |        |        |        |        |         |        |        |         |        |           |
|--------------------------------|---------------------|---------------------------|----|--------|--------|--------|--------|---------|--------|--------|---------|--------|-----------|
| log_s_Fusobacterium_varium     | IschemicStroke      | Simple mode               | 14 | 1.0193 | 0.9725 | 1.0684 | 0.4390 | 0.0167  | 0.0178 | 0.3655 | 20.0564 | 0.0938 | -158.3069 |
| log_s_Fusobacterium_varium     | IschemicStroke      | Weighted mode             | 14 | 1.0163 | 0.9733 | 1.0611 | 0.4777 | 0.0167  | 0.0178 | 0.3655 | 20.0564 | 0.0938 | -158.3069 |
| log_s_Fusobacterium_varium     | LargeArteryStroke   | MR Egger                  | 13 | 1.0506 | 0.8187 | 1.3481 | 0.7056 | -0.0019 | 0.0567 | 0.9743 | 15.1297 | 0.1766 | -49.1168  |
| log_s_Fusobacterium_varium     | LargeArteryStroke   | Weighted median           | 13 | 1.0116 | 0.9349 | 1.0947 | 0.7743 | -0.0019 | 0.0567 | 0.9743 | 15.1297 | 0.1766 | -49.1168  |
| log_s_Fusobacterium_varium     | LargeArteryStroke   | Inverse variance weighted | 13 | 1.0463 | 0.9842 | 1.1124 | 0.1470 | -0.0019 | 0.0567 | 0.9743 | 15.1297 | 0.1766 | -49.1168  |
| log_s_Fusobacterium_varium     | LargeArteryStroke   | Simple mode               | 13 | 1.0104 | 0.8854 | 1.1531 | 0.8803 | -0.0019 | 0.0567 | 0.9743 | 15.1297 | 0.1766 | -49.1168  |
| log_s_Fusobacterium_varium     | LargeArteryStroke   | Weighted mode             | 13 | 1.0064 | 0.8882 | 1.1402 | 0.9222 | -0.0019 | 0.0567 | 0.9743 | 15.1297 | 0.1766 | -49.1168  |
| log_s_Fusobacterium_varium     | SmallVesselStroke   | MR Egger                  | 13 | 1.0102 | 0.8973 | 1.1374 | 0.8696 | -0.0018 | 0.0269 | 0.9466 | 8.6858  | 0.6509 | -154.6154 |
| log_s_Fusobacterium_varium     | SmallVesselStroke   | Weighted median           | 13 | 1.0092 | 0.9688 | 1.0513 | 0.6603 | -0.0018 | 0.0269 | 0.9466 | 8.6858  | 0.6509 | -154.6154 |
| log_s_Fusobacterium_varium     | SmallVesselStroke   | Inverse variance weighted | 13 | 1.0062 | 0.9761 | 1.0372 | 0.6911 | -0.0018 | 0.0269 | 0.9466 | 8.6858  | 0.6509 | -154.6154 |
| log_s_Fusobacterium_varium     | SmallVesselStroke   | Simple mode               | 13 | 1.0164 | 0.9448 | 1.0935 | 0.6699 | -0.0018 | 0.0269 | 0.9466 | 8.6858  | 0.6509 | -154.6154 |
| log_s_Fusobacterium_varium     | SmallVesselStroke   | Weighted mode             | 13 | 1.0111 | 0.9490 | 1.0772 | 0.7390 | -0.0018 | 0.0269 | 0.9466 | 8.6858  | 0.6509 | -154.6154 |
| log_s_Fusobacterium_varium     | Stroke              | MR Egger                  | 14 | 0.9925 | 0.9414 | 1.0464 | 0.7850 | 0.0059  | 0.0121 | 0.6374 | 12.2780 | 0.4236 | -240.0311 |
| log_s_Fusobacterium_varium     | Stroke              | Weighted median           | 14 | 1.0118 | 0.9914 | 1.0327 | 0.2574 | 0.0059  | 0.0121 | 0.6374 | 12.2780 | 0.4236 | -240.0311 |
| log_s_Fusobacterium_varium     | Stroke              | Inverse variance weighted | 14 | 1.0050 | 0.9907 | 1.0195 | 0.4924 | 0.0059  | 0.0121 | 0.6374 | 12.2780 | 0.4236 | -240.0311 |
| log_s_Fusobacterium_varium     | Stroke              | Simple mode               | 14 | 1.0171 | 0.9789 | 1.0569 | 0.4001 | 0.0059  | 0.0121 | 0.6374 | 12.2780 | 0.4236 | -240.0311 |
| log_s_Fusobacterium_varium     | Stroke              | Weighted mode             | 14 | 1.0151 | 0.9781 | 1.0535 | 0.4441 | 0.0059  | 0.0121 | 0.6374 | 12.2780 | 0.4236 | -240.0311 |
| log_s_Gemella_haemolysans      | CardioEmbolicStroke | MR Egger                  | 5  | 0.5669 | 0.3824 | 0.8403 | 0.0664 | 0.2765  | 0.0891 | 0.0531 | 10.9288 | 0.0274 | -380.4269 |
| log_s_Gemella_haemolysans      | CardioEmbolicStroke | Weighted median           | 5  | 1.0182 | 0.8477 | 1.2230 | 0.8473 | 0.2765  | 0.0891 | 0.0531 | 10.9288 | 0.0274 | -380.4269 |
| log_s_Gemella_haemolysans      | CardioEmbolicStroke | Inverse variance weighted | 5  | 1.0236 | 0.8320 | 1.2593 | 0.8252 | 0.2765  | 0.0891 | 0.0531 | 10.9288 | 0.0274 | -380.4269 |
| log_s_Gemella_haemolysans      | CardioEmbolicStroke | Simple mode               | 5  | 1.1743 | 0.8362 | 1.6492 | 0.4062 | 0.2765  | 0.0891 | 0.0531 | 10.9288 | 0.0274 | -380.4269 |
| log_s_Gemella_haemolysans      | CardioEmbolicStroke | Weighted mode             | 5  | 0.9830 | 0.6735 | 1.4346 | 0.9333 | 0.2765  | 0.0891 | 0.0531 | 10.9288 | 0.0274 | -380.4269 |
| log_s_Gemella_haemolysans      | IschemicStroke      | MR Egger                  | 6  | 1.0100 | 0.9682 | 1.0536 | 0.6694 | -0.0031 | 0.0121 | 0.8111 | 1.9256  | 0.7494 | -539.5516 |
| log_s_Gemella_haemolysans      | IschemicStroke      | Weighted median           | 6  | 1.0069 | 0.9782 | 1.0365 | 0.6393 | -0.0031 | 0.0121 | 0.8111 | 1.9256  | 0.7494 | -539.5516 |
| log_s_Gemella_haemolysans      | IschemicStroke      | Inverse variance weighted | 6  | 1.0053 | 0.9831 | 1.0279 | 0.6448 | -0.0031 | 0.0121 | 0.8111 | 1.9256  | 0.7494 | -539.5516 |
| log_s_Gemella_haemolysans      | IschemicStroke      | Simple mode               | 6  | 1.0041 | 0.9647 | 1.0450 | 0.8505 | -0.0031 | 0.0121 | 0.8111 | 1.9256  | 0.7494 | -539.5516 |
| log_s_Gemella_haemolysans      | IschemicStroke      | Weighted mode             | 6  | 1.0087 | 0.9769 | 1.0417 | 0.6180 | -0.0031 | 0.0121 | 0.8111 | 1.9256  | 0.7494 | -539.5516 |
| log_s_Gemella_haemolysans      | LargeArteryStroke   | MR Egger                  | 6  | 0.9818 | 0.8568 | 1.1252 | 0.8051 | 0.0008  | 0.0392 | 0.9846 | 1.7213  | 0.7868 | -199.0201 |
| log_s_Gemella_haemolysans      | LargeArteryStroke   | Weighted median           | 6  | 0.9879 | 0.8995 | 1.0850 | 0.7989 | 0.0008  | 0.0392 | 0.9846 | 1.7213  | 0.7868 | -199.0201 |
| log_s_Gemella_haemolysans      | LargeArteryStroke   | Inverse variance weighted | 6  | 0.9830 | 0.9144 | 1.0569 | 0.6432 | 0.0008  | 0.0392 | 0.9846 | 1.7213  | 0.7868 | -199.0201 |
| log_s_Gemella_haemolysans      | LargeArteryStroke   | Simple mode               | 6  | 0.9907 | 0.8767 | 1.1197 | 0.8874 | 0.0008  | 0.0392 | 0.9846 | 1.7213  | 0.7868 | -199.0201 |
| log_s_Gemella_haemolysans      | LargeArteryStroke   | Weighted mode             | 6  | 0.9881 | 0.8886 | 1.0987 | 0.8338 | 0.0008  | 0.0392 | 0.9846 | 1.7213  | 0.7868 | -199.0201 |
| log_s_Gemella_haemolysans      | SmallVesselStroke   | MR Egger                  | 6  | 1.0150 | 0.9390 | 1.0971 | 0.7274 | -0.0233 | 0.0224 | 0.3572 | 5.4237  | 0.3664 | -196.4495 |
| log_s_Gemella_haemolysans      | SmallVesselStroke   | Weighted median           | 6  | 0.9908 | 0.9375 | 1.0472 | 0.7441 | -0.0233 | 0.0224 | 0.3572 | 5.4237  | 0.3664 | -196.4495 |
| log_s_Gemella_haemolysans      | SmallVesselStroke   | Inverse variance weighted | 6  | 0.9801 | 0.9400 | 1.0219 | 0.3449 | -0.0233 | 0.0224 | 0.3572 | 5.4237  | 0.3664 | -196.4495 |
| log_s_Gemella_haemolysans      | SmallVesselStroke   | Simple mode               | 6  | 1.0102 | 0.9305 | 1.0967 | 0.8185 | -0.0233 | 0.0224 | 0.3572 | 5.4237  | 0.3664 | -196.4495 |
| log_s_Gemella_haemolysans      | SmallVesselStroke   | Weighted mode             | 6  | 0.9994 | 0.9410 | 1.0615 | 0.9862 | -0.0233 | 0.0224 | 0.3572 | 5.4237  | 0.3664 | -196.4495 |
| log_s_Gemella_haemolysans      | Stroke              | MR Egger                  | 6  | 1.0117 | 0.9729 | 1.0521 | 0.5898 | -0.0101 | 0.0107 | 0.3993 | 3.2334  | 0.6640 | -414.3093 |
| log_s_Gemella_haemolysans      | Stroke              | Weighted median           | 6  | 0.9969 | 0.9727 | 1.0217 | 0.8046 | -0.0101 | 0.0107 | 0.3993 | 3.2334  | 0.6640 | -414.3093 |
| log_s_Gemella_haemolysans      | Stroke              | Inverse variance weighted | 6  | 0.9955 | 0.9759 | 1.0154 | 0.6545 | -0.0101 | 0.0107 | 0.3993 | 3.2334  | 0.6640 | -414.3093 |
| log_s_Gemella_haemolysans      | Stroke              | Simple mode               | 6  | 0.9944 | 0.9557 | 1.0348 | 0.7940 | -0.0101 | 0.0107 | 0.3993 | 3.2334  | 0.6640 | -414.3093 |
| log_s_Gemella_haemolysans      | Stroke              | Weighted mode             | 6  | 1.0077 | 0.9765 | 1.0399 | 0.6542 | -0.0101 | 0.0107 | 0.3993 | 3.2334  | 0.6640 | -414.3093 |
| log_s_Lactobacillus_amylovorus | CardioEmbolicStroke | MR Egger                  | 17 | 1.1804 | 0.8116 | 1.7168 | 0.3992 | -0.0416 | 0.0800 | 0.6105 | 7.5636  | 0.9401 | -43.9712  |
| log_s_Lactobacillus_amylovorus | CardioEmbolicStroke | Weighted median           | 17 | 1.0654 | 0.9678 | 1.1728 | 0.1965 | -0.0416 | 0.0800 | 0.6105 | 7.5636  | 0.9401 | -43.9712  |
| log_s_Lactobacillus_amylovorus | CardioEmbolicStroke | Inverse variance weighted | 17 | 1.0705 | 0.9986 | 1.1476 | 0.0550 | -0.0416 | 0.0800 | 0.6105 | 7.5636  | 0.9401 | -43.9712  |
| log_s_Lactobacillus_amylovorus | CardioEmbolicStroke | Simple mode               | 17 | 1.0766 | 0.8977 | 1.2910 | 0.4377 | -0.0416 | 0.0800 | 0.6105 | 7.5636  | 0.9401 | -43.9712  |
| log_s_Lactobacillus_amylovorus | CardioEmbolicStroke | Weighted mode             | 17 | 1.0711 | 0.9101 | 1.2607 | 0.4208 | -0.0416 | 0.0800 | 0.6105 | 7.5636  | 0.9401 | -43.9712  |
| log_s_Lactobacillus_amylovorus | IschemicStroke      | MR Egger                  | 17 | 1.0293 | 0.9448 | 1.1215 | 0.5186 | -0.0061 | 0.0183 | 0.7421 | 11.4328 | 0.7214 | -305.1378 |
| log_s_Lactobacillus_amylovorus | IschemicStroke      | Weighted median           | 17 | 1.0233 | 1.0023 | 1.0448 | 0.0294 | -0.0061 | 0.0183 | 0.7421 | 11.4328 | 0.7214 | -305.1378 |
| log_s_Lactobacillus_amylovorus | IschemicStroke      | Inverse variance weighted | 17 | 1.0146 | 0.9985 | 1.0310 | 0.0753 | -0.0061 | 0.0183 | 0.7421 | 11.4328 | 0.7214 | -305.1378 |
| log_s_Lactobacillus_amylovorus | IschemicStroke      | Simple mode               | 17 | 1.0274 | 0.9882 | 1.0682 | 0.1919 | -0.0061 | 0.0183 | 0.7421 | 11.4328 | 0.7214 | -305.1378 |
| log_s_Lactobacillus_amylovorus | IschemicStroke      | Weighted mode             | 17 | 1.0271 | 0.9897 | 1.0659 | 0.1774 | -0.0061 | 0.0183 | 0.7421 | 11.4328 | 0.7214 | -305.1378 |
| log_s_Lactobacillus_amylovorus | LargeArteryStroke   | MR Egger                  | 17 | 1.2110 | 0.9137 | 1.6050 | 0.2028 | -0.0706 | 0.0601 | 0.2583 | 7.4240  | 0.9642 | -84.8752  |

|                                |                     |                           |    |        |        |        |        |         |        |        |         |        |           |
|--------------------------------|---------------------|---------------------------|----|--------|--------|--------|--------|---------|--------|--------|---------|--------|-----------|
| log_s_Lactobacillus_amylovorus | LargeArteryStroke   | Weighted median           | 17 | 1.0199 | 0.9519 | 1.0928 | 0.5759 | -0.0706 | 0.0601 | 0.2583 | 7.4240  | 0.9642 | -84.8752  |
| log_s_Lactobacillus_amylovorus | LargeArteryStroke   | Inverse variance weighted | 17 | 1.0258 | 0.9736 | 1.0808 | 0.3390 | -0.0706 | 0.0601 | 0.2583 | 7.4240  | 0.9642 | -84.8752  |
| log_s_Lactobacillus_amylovorus | LargeArteryStroke   | Simple mode               | 17 | 1.0036 | 0.8899 | 1.1318 | 0.9546 | -0.0706 | 0.0601 | 0.2583 | 7.4240  | 0.9642 | -84.8752  |
| log_s_Lactobacillus_amylovorus | LargeArteryStroke   | Weighted mode             | 17 | 1.0036 | 0.8947 | 1.1257 | 0.9525 | -0.0706 | 0.0601 | 0.2583 | 7.4240  | 0.9642 | -84.8752  |
| log_s_Lactobacillus_amylovorus | SmallVesselStroke   | MR Egger                  | 17 | 0.9810 | 0.8344 | 1.1533 | 0.8191 | 0.0148  | 0.0346 | 0.6752 | 16.3915 | 0.3565 | -141.9465 |
| log_s_Lactobacillus_amylovorus | SmallVesselStroke   | Weighted median           | 17 | 1.0226 | 0.9813 | 1.0656 | 0.2882 | 0.0148  | 0.0346 | 0.6752 | 16.3915 | 0.3565 | -141.9465 |
| log_s_Lactobacillus_amylovorus | SmallVesselStroke   | Inverse variance weighted | 17 | 1.0156 | 0.9862 | 1.0458 | 0.3023 | 0.0148  | 0.0346 | 0.6752 | 16.3915 | 0.3565 | -141.9465 |
| log_s_Lactobacillus_amylovorus | SmallVesselStroke   | Simple mode               | 17 | 1.0193 | 0.9467 | 1.0974 | 0.6195 | 0.0148  | 0.0346 | 0.6752 | 16.3915 | 0.3565 | -141.9465 |
| log_s_Lactobacillus_amylovorus | SmallVesselStroke   | Weighted mode             | 17 | 1.0170 | 0.9388 | 1.1017 | 0.6849 | 0.0148  | 0.0346 | 0.6752 | 16.3915 | 0.3565 | -141.9465 |
| log_s_Lactobacillus_amylovorus | Stroke              | MR Egger                  | 17 | 1.0294 | 0.9574 | 1.1068 | 0.4460 | -0.0060 | 0.0155 | 0.7031 | 10.1226 | 0.8120 | -371.2689 |
| log_s_Lactobacillus_amylovorus | Stroke              | Weighted median           | 17 | 1.0135 | 0.9948 | 1.0325 | 0.1573 | -0.0060 | 0.0155 | 0.7031 | 10.1226 | 0.8120 | -371.2689 |
| log_s_Lactobacillus_amylovorus | Stroke              | Inverse variance weighted | 17 | 1.0149 | 1.0013 | 1.0287 | 0.0312 | -0.0060 | 0.0155 | 0.7031 | 10.1226 | 0.8120 | -371.2689 |
| log_s_Lactobacillus_amylovorus | Stroke              | Simple mode               | 17 | 1.0163 | 0.9871 | 1.0464 | 0.2935 | -0.0060 | 0.0155 | 0.7031 | 10.1226 | 0.8120 | -371.2689 |
| log_s_Lactobacillus_amylovorus | Stroke              | Weighted mode             | 17 | 1.0163 | 0.9847 | 1.0489 | 0.3314 | -0.0060 | 0.0155 | 0.7031 | 10.1226 | 0.8120 | -371.2689 |
| log_s_Lactobacillus_casei      | CardioEmbolicStroke | MR Egger                  | 12 | 1.1267 | 0.7148 | 1.7760 | 0.6185 | -0.0568 | 0.0952 | 0.5642 | 8.1496  | 0.6142 | -152.9819 |
| log_s_Lactobacillus_casei      | CardioEmbolicStroke | Weighted median           | 12 | 1.0061 | 0.9019 | 1.1223 | 0.9137 | -0.0568 | 0.0952 | 0.5642 | 8.1496  | 0.6142 | -152.9819 |
| log_s_Lactobacillus_casei      | CardioEmbolicStroke | Inverse variance weighted | 12 | 0.9831 | 0.9080 | 1.0644 | 0.6741 | -0.0568 | 0.0952 | 0.5642 | 8.1496  | 0.6142 | -152.9819 |
| log_s_Lactobacillus_casei      | CardioEmbolicStroke | Simple mode               | 12 | 1.0282 | 0.8658 | 1.2212 | 0.7570 | -0.0568 | 0.0952 | 0.5642 | 8.1496  | 0.6142 | -152.9819 |
| log_s_Lactobacillus_casei      | CardioEmbolicStroke | Weighted mode             | 12 | 1.0428 | 0.8890 | 1.2231 | 0.6172 | -0.0568 | 0.0952 | 0.5642 | 8.1496  | 0.6142 | -152.9819 |
| log_s_Lactobacillus_casei      | IschemicStroke      | MR Egger                  | 15 | 1.0320 | 0.9363 | 1.1374 | 0.5370 | -0.0117 | 0.0209 | 0.5860 | 17.1841 | 0.1910 | -101.0313 |
| log_s_Lactobacillus_casei      | IschemicStroke      | Weighted median           | 15 | 1.0119 | 0.9880 | 1.0364 | 0.3309 | -0.0117 | 0.0209 | 0.5860 | 17.1841 | 0.1910 | -101.0313 |
| log_s_Lactobacillus_casei      | IschemicStroke      | Inverse variance weighted | 15 | 1.0044 | 0.9848 | 1.0243 | 0.6640 | -0.0117 | 0.0209 | 0.5860 | 17.1841 | 0.1910 | -101.0313 |
| log_s_Lactobacillus_casei      | IschemicStroke      | Simple mode               | 15 | 1.0147 | 0.9796 | 1.0509 | 0.4307 | -0.0117 | 0.0209 | 0.5860 | 17.1841 | 0.1910 | -101.0313 |
| log_s_Lactobacillus_casei      | IschemicStroke      | Weighted mode             | 15 | 1.0189 | 0.9847 | 1.0542 | 0.3007 | -0.0117 | 0.0209 | 0.5860 | 17.1841 | 0.1910 | -101.0313 |
| log_s_Lactobacillus_casei      | LargeArteryStroke   | MR Egger                  | 15 | 1.0918 | 0.7762 | 1.5357 | 0.6224 | -0.0403 | 0.0733 | 0.5921 | 19.8356 | 0.0994 | -15.3840  |
| log_s_Lactobacillus_casei      | LargeArteryStroke   | Weighted median           | 15 | 0.9963 | 0.9191 | 1.0800 | 0.9280 | -0.0403 | 0.0733 | 0.5921 | 19.8356 | 0.0994 | -15.3840  |
| log_s_Lactobacillus_casei      | LargeArteryStroke   | Inverse variance weighted | 15 | 0.9943 | 0.9281 | 1.0651 | 0.8699 | -0.0403 | 0.0733 | 0.5921 | 19.8356 | 0.0994 | -15.3840  |
| log_s_Lactobacillus_casei      | LargeArteryStroke   | Simple mode               | 15 | 1.0361 | 0.9196 | 1.1673 | 0.5695 | -0.0403 | 0.0733 | 0.5921 | 19.8356 | 0.0994 | -15.3840  |
| log_s_Lactobacillus_casei      | LargeArteryStroke   | Weighted mode             | 15 | 1.0177 | 0.9181 | 1.1280 | 0.7439 | -0.0403 | 0.0733 | 0.5921 | 19.8356 | 0.0994 | -15.3840  |
| log_s_Lactobacillus_casei      | SmallVesselStroke   | MR Egger                  | 15 | 0.9740 | 0.8168 | 1.1615 | 0.7740 | 0.0003  | 0.0379 | 0.9936 | 17.2814 | 0.1868 | -54.6666  |
| log_s_Lactobacillus_casei      | SmallVesselStroke   | Weighted median           | 15 | 0.9886 | 0.9449 | 1.0344 | 0.6203 | 0.0003  | 0.0379 | 0.9936 | 17.2814 | 0.1868 | -54.6666  |
| log_s_Lactobacillus_casei      | SmallVesselStroke   | Inverse variance weighted | 15 | 0.9747 | 0.9411 | 1.0096 | 0.1529 | 0.0003  | 0.0379 | 0.9936 | 17.2814 | 0.1868 | -54.6666  |
| log_s_Lactobacillus_casei      | SmallVesselStroke   | Simple mode               | 15 | 1.0203 | 0.9389 | 1.1087 | 0.6432 | 0.0003  | 0.0379 | 0.9936 | 17.2814 | 0.1868 | -54.6666  |
| log_s_Lactobacillus_casei      | SmallVesselStroke   | Weighted mode             | 15 | 1.0131 | 0.9402 | 1.0917 | 0.7374 | 0.0003  | 0.0379 | 0.9936 | 17.2814 | 0.1868 | -54.6666  |
| log_s_Lactobacillus_casei      | Stroke              | MR Egger                  | 15 | 1.0270 | 0.9587 | 1.1002 | 0.4619 | -0.0108 | 0.0149 | 0.4807 | 9.9475  | 0.6982 | -196.7866 |
| log_s_Lactobacillus_casei      | Stroke              | Weighted median           | 15 | 1.0000 | 0.9801 | 1.0204 | 0.9980 | -0.0108 | 0.0149 | 0.4807 | 9.9475  | 0.6982 | -196.7866 |
| log_s_Lactobacillus_casei      | Stroke              | Inverse variance weighted | 15 | 1.0017 | 0.9870 | 1.0167 | 0.8197 | -0.0108 | 0.0149 | 0.4807 | 9.9475  | 0.6982 | -196.7866 |
| log_s_Lactobacillus_casei      | Stroke              | Simple mode               | 15 | 0.9961 | 0.9658 | 1.0274 | 0.8086 | -0.0108 | 0.0149 | 0.4807 | 9.9475  | 0.6982 | -196.7866 |
| log_s_Lactobacillus_casei      | Stroke              | Weighted mode             | 15 | 0.9954 | 0.9638 | 1.0280 | 0.7828 | -0.0108 | 0.0149 | 0.4807 | 9.9475  | 0.6982 | -196.7866 |
| log_s_Lactobacillus_crispatus  | CardioEmbolicStroke | MR Egger                  | 10 | 0.8653 | 0.5371 | 1.3939 | 0.5683 | 0.0956  | 0.1099 | 0.4098 | 7.9402  | 0.4393 | -107.6088 |
| log_s_Lactobacillus_crispatus  | CardioEmbolicStroke | Weighted median           | 10 | 1.0889 | 0.9680 | 1.2248 | 0.1560 | 0.0956  | 0.1099 | 0.4098 | 7.9402  | 0.4393 | -107.6088 |
| log_s_Lactobacillus_crispatus  | CardioEmbolicStroke | Inverse variance weighted | 10 | 1.0655 | 0.9785 | 1.1602 | 0.1441 | 0.0956  | 0.1099 | 0.4098 | 7.9402  | 0.4393 | -107.6088 |
| log_s_Lactobacillus_crispatus  | CardioEmbolicStroke | Simple mode               | 10 | 1.0953 | 0.8919 | 1.3450 | 0.4076 | 0.0956  | 0.1099 | 0.4098 | 7.9402  | 0.4393 | -107.6088 |
| log_s_Lactobacillus_crispatus  | CardioEmbolicStroke | Weighted mode             | 10 | 1.0769 | 0.8701 | 1.3330 | 0.5129 | 0.0956  | 0.1099 | 0.4098 | 7.9402  | 0.4393 | -107.6088 |
| log_s_Lactobacillus_crispatus  | IschemicStroke      | MR Egger                  | 14 | 0.9871 | 0.9154 | 1.0643 | 0.7411 | 0.0050  | 0.0186 | 0.7934 | 25.5073 | 0.0126 | -85.8622  |
| log_s_Lactobacillus_crispatus  | IschemicStroke      | Weighted median           | 14 | 0.9831 | 0.9595 | 1.0073 | 0.1702 | 0.0050  | 0.0186 | 0.7934 | 25.5073 | 0.0126 | -85.8622  |
| log_s_Lactobacillus_crispatus  | IschemicStroke      | Inverse variance weighted | 14 | 0.9968 | 0.9740 | 1.0200 | 0.7830 | 0.0050  | 0.0186 | 0.7934 | 25.5073 | 0.0126 | -85.8622  |
| log_s_Lactobacillus_crispatus  | IschemicStroke      | Simple mode               | 14 | 0.9868 | 0.9399 | 1.0361 | 0.6019 | 0.0050  | 0.0186 | 0.7934 | 25.5073 | 0.0126 | -85.8622  |
| log_s_Lactobacillus_crispatus  | IschemicStroke      | Weighted mode             | 14 | 0.9827 | 0.9437 | 1.0234 | 0.4151 | 0.0050  | 0.0186 | 0.7934 | 25.5073 | 0.0126 | -85.8622  |
| log_s_Lactobacillus_crispatus  | LargeArteryStroke   | MR Egger                  | 12 | 1.1229 | 0.9219 | 1.3678 | 0.2762 | -0.0505 | 0.0502 | 0.3385 | 14.6582 | 0.1987 | -25.3577  |
| log_s_Lactobacillus_crispatus  | LargeArteryStroke   | Weighted median           | 12 | 1.0332 | 0.9505 | 1.1232 | 0.4426 | -0.0505 | 0.0502 | 0.3385 | 14.6582 | 0.1987 | -25.3577  |
| log_s_Lactobacillus_crispatus  | LargeArteryStroke   | Inverse variance weighted | 12 | 1.0207 | 0.9560 | 1.0897 | 0.5398 | -0.0505 | 0.0502 | 0.3385 | 14.6582 | 0.1987 | -25.3577  |
| log_s_Lactobacillus_crispatus  | LargeArteryStroke   | Simple mode               | 12 | 0.9916 | 0.8383 | 1.1729 | 0.9232 | -0.0505 | 0.0502 | 0.3385 | 14.6582 | 0.1987 | -25.3577  |

|                                 |                     |                           |    |        |        |        |        |         |        |        |         |        |           |
|---------------------------------|---------------------|---------------------------|----|--------|--------|--------|--------|---------|--------|--------|---------|--------|-----------|
| log_s_Lactobacillus_crispatus   | LargeArteryStroke   | Weighted mode             | 12 | 1.0016 | 0.8561 | 1.1718 | 0.9847 | -0.0505 | 0.0502 | 0.3385 | 14.6582 | 0.1987 | -25.3577  |
| log_s_Lactobacillus_crispatus   | SmallVesselStroke   | MR Egger                  | 12 | 0.9100 | 0.8134 | 1.0182 | 0.1308 | 0.0483  | 0.0286 | 0.1224 | 18.4273 | 0.0722 | -42.1685  |
| log_s_Lactobacillus_crispatus   | SmallVesselStroke   | Weighted median           | 12 | 1.0024 | 0.9539 | 1.0535 | 0.9234 | 0.0483  | 0.0286 | 0.1224 | 18.4273 | 0.0722 | -42.1685  |
| log_s_Lactobacillus_crispatus   | SmallVesselStroke   | Inverse variance weighted | 12 | 0.9968 | 0.9569 | 1.0382 | 0.8761 | 0.0483  | 0.0286 | 0.1224 | 18.4273 | 0.0722 | -42.1685  |
| log_s_Lactobacillus_crispatus   | SmallVesselStroke   | Simple mode               | 12 | 1.0492 | 0.9574 | 1.1498 | 0.3262 | 0.0483  | 0.0286 | 0.1224 | 18.4273 | 0.0722 | -42.1685  |
| log_s_Lactobacillus_crispatus   | SmallVesselStroke   | Weighted mode             | 12 | 1.0085 | 0.9209 | 1.1044 | 0.8582 | 0.0483  | 0.0286 | 0.1224 | 18.4273 | 0.0722 | -42.1685  |
| log_s_Lactobacillus_crispatus   | Stroke              | MR Egger                  | 14 | 0.9966 | 0.9263 | 1.0721 | 0.9278 | 0.0032  | 0.0180 | 0.8606 | 32.8555 | 0.0010 | -84.4184  |
| log_s_Lactobacillus_crispatus   | Stroke              | Weighted median           | 14 | 0.9898 | 0.9696 | 1.0103 | 0.3273 | 0.0032  | 0.0180 | 0.8606 | 32.8555 | 0.0010 | -84.4184  |
| log_s_Lactobacillus_crispatus   | Stroke              | Inverse variance weighted | 14 | 1.0029 | 0.9810 | 1.0253 | 0.7973 | 0.0032  | 0.0180 | 0.8606 | 32.8555 | 0.0010 | -84.4184  |
| log_s_Lactobacillus_crispatus   | Stroke              | Simple mode               | 14 | 0.9896 | 0.9586 | 1.0216 | 0.5318 | 0.0032  | 0.0180 | 0.8606 | 32.8555 | 0.0010 | -84.4184  |
| log_s_Lactobacillus_crispatus   | Stroke              | Weighted mode             | 14 | 0.9880 | 0.9630 | 1.0135 | 0.3690 | 0.0032  | 0.0180 | 0.8606 | 32.8555 | 0.0010 | -84.4184  |
| log_s_Lactobacillus_delbrueckii | CardioEmbolicStroke | MR Egger                  | 11 | 0.8236 | 0.5264 | 1.2885 | 0.4174 | 0.0889  | 0.0956 | 0.3763 | 7.2672  | 0.6093 | -132.5344 |
| log_s_Lactobacillus_delbrueckii | CardioEmbolicStroke | Weighted median           | 11 | 0.9906 | 0.8871 | 1.1062 | 0.8674 | 0.0889  | 0.0956 | 0.3763 | 7.2672  | 0.6093 | -132.5344 |
| log_s_Lactobacillus_delbrueckii | CardioEmbolicStroke | Inverse variance weighted | 11 | 1.0148 | 0.9335 | 1.1032 | 0.7302 | 0.0889  | 0.0956 | 0.3763 | 7.2672  | 0.6093 | -132.5344 |
| log_s_Lactobacillus_delbrueckii | CardioEmbolicStroke | Simple mode               | 11 | 1.0836 | 0.8981 | 1.3073 | 0.4216 | 0.0889  | 0.0956 | 0.3763 | 7.2672  | 0.6093 | -132.5344 |
| log_s_Lactobacillus_delbrueckii | CardioEmbolicStroke | Weighted mode             | 11 | 0.9683 | 0.8134 | 1.1528 | 0.7249 | 0.0889  | 0.0956 | 0.3763 | 7.2672  | 0.6093 | -132.5344 |
| log_s_Lactobacillus_delbrueckii | IschemicStroke      | MR Egger                  | 11 | 1.0422 | 0.9394 | 1.1562 | 0.4556 | -0.0197 | 0.0221 | 0.3961 | 8.7979  | 0.4561 | -636.6557 |
| log_s_Lactobacillus_delbrueckii | IschemicStroke      | Weighted median           | 11 | 0.9837 | 0.9579 | 1.0101 | 0.2233 | -0.0197 | 0.0221 | 0.3961 | 8.7979  | 0.4561 | -636.6557 |
| log_s_Lactobacillus_delbrueckii | IschemicStroke      | Inverse variance weighted | 11 | 0.9949 | 0.9759 | 1.0143 | 0.6051 | -0.0197 | 0.0221 | 0.3961 | 8.7979  | 0.4561 | -636.6557 |
| log_s_Lactobacillus_delbrueckii | IschemicStroke      | Simple mode               | 11 | 0.9765 | 0.9344 | 1.0204 | 0.3143 | -0.0197 | 0.0221 | 0.3961 | 8.7979  | 0.4561 | -636.6557 |
| log_s_Lactobacillus_delbrueckii | IschemicStroke      | Weighted mode             | 11 | 0.9785 | 0.9362 | 1.0226 | 0.3559 | -0.0197 | 0.0221 | 0.3961 | 8.7979  | 0.4561 | -636.6557 |
| log_s_Lactobacillus_delbrueckii | LargeArteryStroke   | MR Egger                  | 11 | 1.1925 | 0.8169 | 1.7409 | 0.3855 | -0.0609 | 0.0807 | 0.4695 | 11.4321 | 0.2472 | -142.4204 |
| log_s_Lactobacillus_delbrueckii | LargeArteryStroke   | Weighted median           | 11 | 1.0032 | 0.9178 | 1.0965 | 0.9447 | -0.0609 | 0.0807 | 0.4695 | 11.4321 | 0.2472 | -142.4204 |
| log_s_Lactobacillus_delbrueckii | LargeArteryStroke   | Inverse variance weighted | 11 | 1.0334 | 0.9648 | 1.1069 | 0.3488 | -0.0609 | 0.0807 | 0.4695 | 11.4321 | 0.2472 | -142.4204 |
| log_s_Lactobacillus_delbrueckii | LargeArteryStroke   | Simple mode               | 11 | 1.0201 | 0.8669 | 1.2003 | 0.8156 | -0.0609 | 0.0807 | 0.4695 | 11.4321 | 0.2472 | -142.4204 |
| log_s_Lactobacillus_delbrueckii | LargeArteryStroke   | Weighted mode             | 11 | 1.0142 | 0.8719 | 1.1797 | 0.8589 | -0.0609 | 0.0807 | 0.4695 | 11.4321 | 0.2472 | -142.4204 |
| log_s_Lactobacillus_delbrueckii | SmallVesselStroke   | MR Egger                  | 11 | 1.0299 | 0.8550 | 1.2406 | 0.7633 | -0.0180 | 0.0397 | 0.6604 | 5.4588  | 0.7926 | -458.8021 |
| log_s_Lactobacillus_delbrueckii | SmallVesselStroke   | Weighted median           | 11 | 0.9968 | 0.9507 | 1.0452 | 0.8950 | -0.0180 | 0.0397 | 0.6604 | 5.4588  | 0.7926 | -458.8021 |
| log_s_Lactobacillus_delbrueckii | SmallVesselStroke   | Inverse variance weighted | 11 | 0.9872 | 0.9535 | 1.0220 | 0.4658 | -0.0180 | 0.0397 | 0.6604 | 5.4588  | 0.7926 | -458.8021 |
| log_s_Lactobacillus_delbrueckii | SmallVesselStroke   | Simple mode               | 11 | 1.0107 | 0.9323 | 1.0957 | 0.8016 | -0.0180 | 0.0397 | 0.6604 | 5.4588  | 0.7926 | -458.8021 |
| log_s_Lactobacillus_delbrueckii | SmallVesselStroke   | Weighted mode             | 11 | 1.0101 | 0.9391 | 1.0865 | 0.7922 | -0.0180 | 0.0397 | 0.6604 | 5.4588  | 0.7926 | -458.8021 |
| log_s_Lactobacillus_delbrueckii | Stroke              | MR Egger                  | 10 | 1.0548 | 0.9654 | 1.1525 | 0.2714 | -0.0249 | 0.0190 | 0.2268 | 7.7082  | 0.5638 | -846.2311 |
| log_s_Lactobacillus_delbrueckii | Stroke              | Weighted median           | 10 | 0.9850 | 0.9633 | 1.0072 | 0.1834 | -0.0249 | 0.0190 | 0.2268 | 7.7082  | 0.5638 | -846.2311 |
| log_s_Lactobacillus_delbrueckii | Stroke              | Inverse variance weighted | 10 | 0.9953 | 0.9785 | 1.0124 | 0.5908 | -0.0249 | 0.0190 | 0.2268 | 7.7082  | 0.5638 | -846.2311 |
| log_s_Lactobacillus_delbrueckii | Stroke              | Simple mode               | 10 | 0.9777 | 0.9434 | 1.0132 | 0.2467 | -0.0249 | 0.0190 | 0.2268 | 7.7082  | 0.5638 | -846.2311 |
| log_s_Lactobacillus_delbrueckii | Stroke              | Weighted mode             | 10 | 0.9771 | 0.9437 | 1.0118 | 0.2252 | -0.0249 | 0.0190 | 0.2268 | 7.7082  | 0.5638 | -846.2311 |
| log_s_Lactobacillus_fermentum   | CardioEmbolicStroke | MR Egger                  | 8  | 0.7552 | 0.4288 | 1.3301 | 0.3685 | 0.0985  | 0.1152 | 0.4255 | 5.4303  | 0.4899 | -483.4112 |
| log_s_Lactobacillus_fermentum   | CardioEmbolicStroke | Weighted median           | 8  | 0.9688 | 0.8434 | 1.1128 | 0.6537 | 0.0985  | 0.1152 | 0.4255 | 5.4303  | 0.4899 | -483.4112 |
| log_s_Lactobacillus_fermentum   | CardioEmbolicStroke | Inverse variance weighted | 8  | 0.9627 | 0.8691 | 1.0664 | 0.4667 | 0.0985  | 0.1152 | 0.4255 | 5.4303  | 0.4899 | -483.4112 |
| log_s_Lactobacillus_fermentum   | CardioEmbolicStroke | Simple mode               | 8  | 0.9741 | 0.7637 | 1.2426 | 0.8389 | 0.0985  | 0.1152 | 0.4255 | 5.4303  | 0.4899 | -483.4112 |
| log_s_Lactobacillus_fermentum   | CardioEmbolicStroke | Weighted mode             | 8  | 0.9896 | 0.7963 | 1.2299 | 0.9275 | 0.0985  | 0.1152 | 0.4255 | 5.4303  | 0.4899 | -483.4112 |
| log_s_Lactobacillus_fermentum   | IschemicStroke      | MR Egger                  | 10 | 0.9701 | 0.9104 | 1.0337 | 0.3765 | 0.0115  | 0.0145 | 0.4533 | 7.2951  | 0.5052 | -390.7127 |
| log_s_Lactobacillus_fermentum   | IschemicStroke      | Weighted median           | 10 | 0.9969 | 0.9707 | 1.0239 | 0.8218 | 0.0115  | 0.0145 | 0.4533 | 7.2951  | 0.5052 | -390.7127 |
| log_s_Lactobacillus_fermentum   | IschemicStroke      | Inverse variance weighted | 10 | 0.9939 | 0.9739 | 1.0142 | 0.5531 | 0.0115  | 0.0145 | 0.4533 | 7.2951  | 0.5052 | -390.7127 |
| log_s_Lactobacillus_fermentum   | IschemicStroke      | Simple mode               | 10 | 1.0203 | 0.9722 | 1.0708 | 0.4358 | 0.0115  | 0.0145 | 0.4533 | 7.2951  | 0.5052 | -390.7127 |
| log_s_Lactobacillus_fermentum   | IschemicStroke      | Weighted mode             | 10 | 1.0195 | 0.9749 | 1.0661 | 0.4188 | 0.0115  | 0.0145 | 0.4533 | 7.2951  | 0.5052 | -390.7127 |
| log_s_Lactobacillus_fermentum   | LargeArteryStroke   | MR Egger                  | 9  | 0.6903 | 0.4994 | 0.9543 | 0.0598 | 0.1127  | 0.0702 | 0.1526 | 14.4364 | 0.0711 | -63.5448  |
| log_s_Lactobacillus_fermentum   | LargeArteryStroke   | Weighted median           | 9  | 0.8797 | 0.7946 | 0.9740 | 0.0136 | 0.1127  | 0.0702 | 0.1526 | 14.4364 | 0.0711 | -63.5448  |
| log_s_Lactobacillus_fermentum   | LargeArteryStroke   | Inverse variance weighted | 9  | 0.8913 | 0.8111 | 0.9795 | 0.0168 | 0.1127  | 0.0702 | 0.1526 | 14.4364 | 0.0711 | -63.5448  |
| log_s_Lactobacillus_fermentum   | LargeArteryStroke   | Simple mode               | 9  | 0.8401 | 0.7281 | 0.9694 | 0.0441 | 0.1127  | 0.0702 | 0.1526 | 14.4364 | 0.0711 | -63.5448  |
| log_s_Lactobacillus_fermentum   | LargeArteryStroke   | Weighted mode             | 9  | 0.8472 | 0.7305 | 0.9827 | 0.0598 | 0.1127  | 0.0702 | 0.1526 | 14.4364 | 0.0711 | -63.5448  |
| log_s_Lactobacillus_fermentum   | SmallVesselStroke   | MR Egger                  | 9  | 0.9983 | 0.8110 | 1.2290 | 0.9879 | -0.0012 | 0.0455 | 0.9803 | 15.2869 | 0.0325 | -302.7864 |
| log_s_Lactobacillus_fermentum   | SmallVesselStroke   | Weighted median           | 9  | 1.0244 | 0.9673 | 1.0848 | 0.4096 | -0.0012 | 0.0455 | 0.9803 | 15.2869 | 0.0325 | -302.7864 |

|                               |                     |                           |    |        |        |        |        |         |        |        |         |        |           |
|-------------------------------|---------------------|---------------------------|----|--------|--------|--------|--------|---------|--------|--------|---------|--------|-----------|
| log_s_Lactobacillus_fermentum | SmallVesselStroke   | Inverse variance weighted | 9  | 0.9957 | 0.9438 | 1.0505 | 0.8754 | -0.0012 | 0.0455 | 0.9803 | 15.2869 | 0.0325 | -302.7864 |
| log_s_Lactobacillus_fermentum | SmallVesselStroke   | Simple mode               | 9  | 1.0485 | 0.9388 | 1.1711 | 0.4253 | -0.0012 | 0.0455 | 0.9803 | 15.2869 | 0.0325 | -302.7864 |
| log_s_Lactobacillus_fermentum | SmallVesselStroke   | Weighted mode             | 9  | 1.0422 | 0.9482 | 1.1456 | 0.4160 | -0.0012 | 0.0455 | 0.9803 | 15.2869 | 0.0325 | -302.7864 |
| log_s_Lactobacillus_fermentum | Stroke              | MR Egger                  | 10 | 0.9602 | 0.9093 | 1.0139 | 0.1818 | 0.0161  | 0.0125 | 0.2343 | 7.6026  | 0.5746 | -437.2099 |
| log_s_Lactobacillus_fermentum | Stroke              | Weighted median           | 10 | 0.9925 | 0.9697 | 1.0159 | 0.5284 | 0.0161  | 0.0125 | 0.2343 | 7.6026  | 0.5746 | -437.2099 |
| log_s_Lactobacillus_fermentum | Stroke              | Inverse variance weighted | 10 | 0.9933 | 0.9762 | 1.0107 | 0.4460 | 0.0161  | 0.0125 | 0.2343 | 7.6026  | 0.5746 | -437.2099 |
| log_s_Lactobacillus_fermentum | Stroke              | Simple mode               | 10 | 1.0105 | 0.9685 | 1.0544 | 0.6404 | 0.0161  | 0.0125 | 0.2343 | 7.6026  | 0.5746 | -437.2099 |
| log_s_Lactobacillus_fermentum | Stroke              | Weighted mode             | 10 | 0.9754 | 0.9375 | 1.0147 | 0.2477 | 0.0161  | 0.0125 | 0.2343 | 7.6026  | 0.5746 | -437.2099 |
| log_s_Lactobacillus_gasseri   | CardioEmbolicStroke | MR Egger                  | 8  | 1.2324 | 0.8641 | 1.7578 | 0.2926 | -0.0968 | 0.0772 | 0.2562 | 4.9040  | 0.6717 | -301.0780 |
| log_s_Lactobacillus_gasseri   | CardioEmbolicStroke | Weighted median           | 8  | 0.9907 | 0.8687 | 1.1297 | 0.8886 | -0.0968 | 0.0772 | 0.2562 | 4.9040  | 0.6717 | -301.0780 |
| log_s_Lactobacillus_gasseri   | CardioEmbolicStroke | Inverse variance weighted | 8  | 0.9909 | 0.8965 | 1.0951 | 0.8575 | -0.0968 | 0.0772 | 0.2562 | 4.9040  | 0.6717 | -301.0780 |
| log_s_Lactobacillus_gasseri   | CardioEmbolicStroke | Simple mode               | 8  | 0.9109 | 0.7340 | 1.1305 | 0.4252 | -0.0968 | 0.0772 | 0.2562 | 4.9040  | 0.6717 | -301.0780 |
| log_s_Lactobacillus_gasseri   | CardioEmbolicStroke | Weighted mode             | 8  | 1.0341 | 0.8429 | 1.2686 | 0.7574 | -0.0968 | 0.0772 | 0.2562 | 4.9040  | 0.6717 | -301.0780 |
| log_s_Lactobacillus_gasseri   | IschemicStroke      | MR Egger                  | 9  | 1.0512 | 0.9849 | 1.1221 | 0.1770 | -0.0125 | 0.0150 | 0.4293 | 3.2117  | 0.9204 | -378.4456 |
| log_s_Lactobacillus_gasseri   | IschemicStroke      | Weighted median           | 9  | 1.0209 | 0.9934 | 1.0492 | 0.1383 | -0.0125 | 0.0150 | 0.4293 | 3.2117  | 0.9204 | -378.4456 |
| log_s_Lactobacillus_gasseri   | IschemicStroke      | Inverse variance weighted | 9  | 1.0239 | 1.0021 | 1.0462 | 0.0318 | -0.0125 | 0.0150 | 0.4293 | 3.2117  | 0.9204 | -378.4456 |
| log_s_Lactobacillus_gasseri   | IschemicStroke      | Simple mode               | 9  | 1.0048 | 0.9603 | 1.0514 | 0.8405 | -0.0125 | 0.0150 | 0.4293 | 3.2117  | 0.9204 | -378.4456 |
| log_s_Lactobacillus_gasseri   | IschemicStroke      | Weighted mode             | 9  | 1.0046 | 0.9630 | 1.0479 | 0.8377 | -0.0125 | 0.0150 | 0.4293 | 3.2117  | 0.9204 | -378.4456 |
| log_s_Lactobacillus_gasseri   | LargeArteryStroke   | MR Egger                  | 8  | 1.2319 | 0.9431 | 1.6093 | 0.1769 | -0.1019 | 0.0580 | 0.1293 | 4.6292  | 0.7051 | -318.9804 |
| log_s_Lactobacillus_gasseri   | LargeArteryStroke   | Weighted median           | 8  | 0.9666 | 0.8799 | 1.0617 | 0.4779 | -0.1019 | 0.0580 | 0.1293 | 4.6292  | 0.7051 | -318.9804 |
| log_s_Lactobacillus_gasseri   | LargeArteryStroke   | Inverse variance weighted | 8  | 0.9788 | 0.9082 | 1.0550 | 0.5754 | -0.1019 | 0.0580 | 0.1293 | 4.6292  | 0.7051 | -318.9804 |
| log_s_Lactobacillus_gasseri   | LargeArteryStroke   | Simple mode               | 8  | 0.9414 | 0.7970 | 1.1119 | 0.5001 | -0.1019 | 0.0580 | 0.1293 | 4.6292  | 0.7051 | -318.9804 |
| log_s_Lactobacillus_gasseri   | LargeArteryStroke   | Weighted mode             | 8  | 0.9367 | 0.7954 | 1.1030 | 0.4585 | -0.1019 | 0.0580 | 0.1293 | 4.6292  | 0.7051 | -318.9804 |
| log_s_Lactobacillus_gasseri   | SmallVesselStroke   | MR Egger                  | 8  | 1.1430 | 0.9590 | 1.3621 | 0.1861 | -0.0471 | 0.0382 | 0.2634 | 10.6691 | 0.1537 | -368.2416 |
| log_s_Lactobacillus_gasseri   | SmallVesselStroke   | Weighted median           | 8  | 1.0407 | 0.9847 | 1.0998 | 0.1573 | -0.0471 | 0.0382 | 0.2634 | 10.6691 | 0.1537 | -368.2416 |
| log_s_Lactobacillus_gasseri   | SmallVesselStroke   | Inverse variance weighted | 8  | 1.0280 | 0.9767 | 1.0821 | 0.2900 | -0.0471 | 0.0382 | 0.2634 | 10.6691 | 0.1537 | -368.2416 |
| log_s_Lactobacillus_gasseri   | SmallVesselStroke   | Simple mode               | 8  | 1.0456 | 0.9498 | 1.1510 | 0.3933 | -0.0471 | 0.0382 | 0.2634 | 10.6691 | 0.1537 | -368.2416 |
| log_s_Lactobacillus_gasseri   | SmallVesselStroke   | Weighted mode             | 8  | 1.0507 | 0.9563 | 1.1543 | 0.3374 | -0.0471 | 0.0382 | 0.2634 | 10.6691 | 0.1537 | -368.2416 |
| log_s_Lactobacillus_gasseri   | Stroke              | MR Egger                  | 9  | 1.0330 | 0.9754 | 1.0939 | 0.3043 | -0.0075 | 0.0130 | 0.5828 | 3.1175  | 0.8739 | -542.4239 |
| log_s_Lactobacillus_gasseri   | Stroke              | Weighted median           | 9  | 1.0088 | 0.9849 | 1.0333 | 0.4744 | -0.0075 | 0.0130 | 0.5828 | 3.1175  | 0.8739 | -542.4239 |
| log_s_Lactobacillus_gasseri   | Stroke              | Inverse variance weighted | 9  | 1.0166 | 0.9980 | 1.0356 | 0.0809 | -0.0075 | 0.0130 | 0.5828 | 3.1175  | 0.8739 | -542.4239 |
| log_s_Lactobacillus_gasseri   | Stroke              | Simple mode               | 9  | 1.0034 | 0.9661 | 1.0421 | 0.8665 | -0.0075 | 0.0130 | 0.5828 | 3.1175  | 0.8739 | -542.4239 |
| log_s_Lactobacillus_gasseri   | Stroke              | Weighted mode             | 9  | 1.0034 | 0.9658 | 1.0424 | 0.8674 | -0.0075 | 0.0130 | 0.5828 | 3.1175  | 0.8739 | -542.4239 |
| log_s_Lactobacillus_reuteri   | CardioEmbolicStroke | MR Egger                  | 8  | 1.1535 | 0.7559 | 1.7602 | 0.5325 | -0.0594 | 0.0945 | 0.5529 | 2.4864  | 0.8700 | -371.1542 |
| log_s_Lactobacillus_reuteri   | CardioEmbolicStroke | Weighted median           | 8  | 1.0454 | 0.9241 | 1.1827 | 0.4805 | -0.0594 | 0.0945 | 0.5529 | 2.4864  | 0.8700 | -371.1542 |
| log_s_Lactobacillus_reuteri   | CardioEmbolicStroke | Inverse variance weighted | 8  | 1.0108 | 0.9190 | 1.1118 | 0.8250 | -0.0594 | 0.0945 | 0.5529 | 2.4864  | 0.8700 | -371.1542 |
| log_s_Lactobacillus_reuteri   | CardioEmbolicStroke | Simple mode               | 8  | 1.0635 | 0.8883 | 1.2732 | 0.5241 | -0.0594 | 0.0945 | 0.5529 | 2.4864  | 0.8700 | -371.1542 |
| log_s_Lactobacillus_reuteri   | CardioEmbolicStroke | Weighted mode             | 8  | 1.0571 | 0.8897 | 1.2560 | 0.5480 | -0.0594 | 0.0945 | 0.5529 | 2.4864  | 0.8700 | -371.1542 |
| log_s_Lactobacillus_reuteri   | IschemicStroke      | MR Egger                  | 9  | 1.0312 | 0.9298 | 1.1437 | 0.5791 | -0.0091 | 0.0236 | 0.7125 | 9.9811  | 0.1896 | -431.4415 |
| log_s_Lactobacillus_reuteri   | IschemicStroke      | Weighted median           | 9  | 1.0146 | 0.9865 | 1.0435 | 0.3133 | -0.0091 | 0.0236 | 0.7125 | 9.9811  | 0.1896 | -431.4415 |
| log_s_Lactobacillus_reuteri   | IschemicStroke      | Inverse variance weighted | 9  | 1.0111 | 0.9871 | 1.0358 | 0.3674 | -0.0091 | 0.0236 | 0.7125 | 9.9811  | 0.1896 | -431.4415 |
| log_s_Lactobacillus_reuteri   | IschemicStroke      | Simple mode               | 9  | 1.0148 | 0.9715 | 1.0599 | 0.5282 | -0.0091 | 0.0236 | 0.7125 | 9.9811  | 0.1896 | -431.4415 |
| log_s_Lactobacillus_reuteri   | IschemicStroke      | Weighted mode             | 9  | 1.0167 | 0.9777 | 1.0571 | 0.4312 | -0.0091 | 0.0236 | 0.7125 | 9.9811  | 0.1896 | -431.4415 |
| log_s_Lactobacillus_reuteri   | LargeArteryStroke   | MR Egger                  | 8  | 0.7868 | 0.5728 | 1.0809 | 0.1894 | 0.1118  | 0.0709 | 0.1658 | 4.5060  | 0.7200 | -401.7972 |
| log_s_Lactobacillus_reuteri   | LargeArteryStroke   | Weighted median           | 8  | 0.9728 | 0.8864 | 1.0677 | 0.5611 | 0.1118  | 0.0709 | 0.1658 | 4.5060  | 0.7200 | -401.7972 |
| log_s_Lactobacillus_reuteri   | LargeArteryStroke   | Inverse variance weighted | 8  | 1.0093 | 0.9400 | 1.0838 | 0.7983 | 0.1118  | 0.0709 | 0.1658 | 4.5060  | 0.7200 | -401.7972 |
| log_s_Lactobacillus_reuteri   | LargeArteryStroke   | Simple mode               | 8  | 0.9584 | 0.8365 | 1.0981 | 0.5599 | 0.1118  | 0.0709 | 0.1658 | 4.5060  | 0.7200 | -401.7972 |
| log_s_Lactobacillus_reuteri   | LargeArteryStroke   | Weighted mode             | 8  | 0.9600 | 0.8377 | 1.1001 | 0.5751 | 0.1118  | 0.0709 | 0.1658 | 4.5060  | 0.7200 | -401.7972 |
| log_s_Lactobacillus_reuteri   | SmallVesselStroke   | MR Egger                  | 8  | 1.0396 | 0.8660 | 1.2482 | 0.6913 | -0.0021 | 0.0409 | 0.9600 | 6.5462  | 0.3649 | -547.8796 |
| log_s_Lactobacillus_reuteri   | SmallVesselStroke   | Weighted median           | 8  | 1.0123 | 0.9602 | 1.0672 | 0.6513 | -0.0021 | 0.0409 | 0.9600 | 6.5462  | 0.3649 | -547.8796 |
| log_s_Lactobacillus_reuteri   | SmallVesselStroke   | Inverse variance weighted | 8  | 1.0347 | 0.9946 | 1.0764 | 0.0905 | -0.0021 | 0.0409 | 0.9600 | 6.5462  | 0.3649 | -547.8796 |
| log_s_Lactobacillus_reuteri   | SmallVesselStroke   | Simple mode               | 8  | 1.0002 | 0.9235 | 1.0834 | 0.9955 | -0.0021 | 0.0409 | 0.9600 | 6.5462  | 0.3649 | -547.8796 |
| log_s_Lactobacillus_reuteri   | SmallVesselStroke   | Weighted mode             | 8  | 1.0064 | 0.9323 | 1.0863 | 0.8753 | -0.0021 | 0.0409 | 0.9600 | 6.5462  | 0.3649 | -547.8796 |

|                                |                     |                           |    |        |        |        |        |         |        |        |         |        |           |
|--------------------------------|---------------------|---------------------------|----|--------|--------|--------|--------|---------|--------|--------|---------|--------|-----------|
| log_s_Lactobacillus_reuteri    | Stroke              | MR Egger                  | 10 | 1.0238 | 0.9507 | 1.1025 | 0.5512 | -0.0046 | 0.0171 | 0.7951 | 8.7718  | 0.3619 | -474.0744 |
| log_s_Lactobacillus_reuteri    | Stroke              | Weighted median           | 10 | 1.0107 | 0.9865 | 1.0356 | 0.3878 | -0.0046 | 0.0171 | 0.7951 | 8.7718  | 0.3619 | -474.0744 |
| log_s_Lactobacillus_reuteri    | Stroke              | Inverse variance weighted | 10 | 1.0138 | 0.9958 | 1.0321 | 0.1335 | -0.0046 | 0.0171 | 0.7951 | 8.7718  | 0.3619 | -474.0744 |
| log_s_Lactobacillus_reuteri    | Stroke              | Simple mode               | 10 | 1.0138 | 0.9775 | 1.0514 | 0.4806 | -0.0046 | 0.0171 | 0.7951 | 8.7718  | 0.3619 | -474.0744 |
| log_s_Lactobacillus_reuteri    | Stroke              | Weighted mode             | 10 | 1.0106 | 0.9757 | 1.0467 | 0.5707 | -0.0046 | 0.0171 | 0.7951 | 8.7718  | 0.3619 | -474.0744 |
| log_s_Lactobacillus_vaginalis  | CardioEmbolicStroke | MR Egger                  | 10 | 0.9920 | 0.8239 | 1.1943 | 0.9343 | -0.0084 | 0.0477 | 0.8649 | 6.0901  | 0.6371 | -88.5239  |
| log_s_Lactobacillus_vaginalis  | CardioEmbolicStroke | Weighted median           | 10 | 0.9733 | 0.8739 | 1.0841 | 0.6233 | -0.0084 | 0.0477 | 0.8649 | 6.0901  | 0.6371 | -88.5239  |
| log_s_Lactobacillus_vaginalis  | CardioEmbolicStroke | Inverse variance weighted | 10 | 0.9770 | 0.9054 | 1.0544 | 0.5501 | -0.0084 | 0.0477 | 0.8649 | 6.0901  | 0.6371 | -88.5239  |
| log_s_Lactobacillus_vaginalis  | CardioEmbolicStroke | Simple mode               | 10 | 0.9476 | 0.8241 | 1.0897 | 0.4696 | -0.0084 | 0.0477 | 0.8649 | 6.0901  | 0.6371 | -88.5239  |
| log_s_Lactobacillus_vaginalis  | CardioEmbolicStroke | Weighted mode             | 10 | 0.9704 | 0.8593 | 1.0958 | 0.6392 | -0.0084 | 0.0477 | 0.8649 | 6.0901  | 0.6371 | -88.5239  |
| log_s_Lactobacillus_vaginalis  | IschemicStroke      | MR Egger                  | 11 | 0.9880 | 0.9477 | 1.0302 | 0.5859 | 0.0047  | 0.0112 | 0.6879 | 10.5996 | 0.3042 | -258.1618 |
| log_s_Lactobacillus_vaginalis  | IschemicStroke      | Weighted median           | 11 | 0.9959 | 0.9729 | 1.0195 | 0.7325 | 0.0047  | 0.0112 | 0.6879 | 10.5996 | 0.3042 | -258.1618 |
| log_s_Lactobacillus_vaginalis  | IschemicStroke      | Inverse variance weighted | 11 | 0.9960 | 0.9790 | 1.0132 | 0.6435 | 0.0047  | 0.0112 | 0.6879 | 10.5996 | 0.3042 | -258.1618 |
| log_s_Lactobacillus_vaginalis  | IschemicStroke      | Simple mode               | 11 | 1.0081 | 0.9631 | 1.0553 | 0.7353 | 0.0047  | 0.0112 | 0.6879 | 10.5996 | 0.3042 | -258.1618 |
| log_s_Lactobacillus_vaginalis  | IschemicStroke      | Weighted mode             | 11 | 0.9843 | 0.9570 | 1.0125 | 0.2982 | 0.0047  | 0.0112 | 0.6879 | 10.5996 | 0.3042 | -258.1618 |
| log_s_Lactobacillus_vaginalis  | LargeArteryStroke   | MR Egger                  | 11 | 1.0250 | 0.9056 | 1.1602 | 0.7048 | -0.0042 | 0.0334 | 0.9025 | 8.3781  | 0.4965 | -49.2598  |
| log_s_Lactobacillus_vaginalis  | LargeArteryStroke   | Weighted median           | 11 | 0.9983 | 0.9231 | 1.0795 | 0.9650 | -0.0042 | 0.0334 | 0.9025 | 8.3781  | 0.4965 | -49.2598  |
| log_s_Lactobacillus_vaginalis  | LargeArteryStroke   | Inverse variance weighted | 11 | 1.0177 | 0.9649 | 1.0734 | 0.5189 | -0.0042 | 0.0334 | 0.9025 | 8.3781  | 0.4965 | -49.2598  |
| log_s_Lactobacillus_vaginalis  | LargeArteryStroke   | Simple mode               | 11 | 0.9857 | 0.8698 | 1.1171 | 0.8265 | -0.0042 | 0.0334 | 0.9025 | 8.3781  | 0.4965 | -49.2598  |
| log_s_Lactobacillus_vaginalis  | LargeArteryStroke   | Weighted mode             | 11 | 0.9927 | 0.9073 | 1.0862 | 0.8769 | -0.0042 | 0.0334 | 0.9025 | 8.3781  | 0.4965 | -49.2598  |
| log_s_Lactobacillus_vaginalis  | SmallVesselStroke   | MR Egger                  | 11 | 0.9442 | 0.8790 | 1.0142 | 0.1500 | 0.0185  | 0.0193 | 0.3633 | 9.6692  | 0.3779 | -109.4105 |
| log_s_Lactobacillus_vaginalis  | SmallVesselStroke   | Weighted median           | 11 | 0.9689 | 0.9304 | 1.0090 | 0.1267 | 0.0185  | 0.0193 | 0.3633 | 9.6692  | 0.3779 | -109.4105 |
| log_s_Lactobacillus_vaginalis  | SmallVesselStroke   | Inverse variance weighted | 11 | 0.9745 | 0.9451 | 1.0047 | 0.0973 | 0.0185  | 0.0193 | 0.3633 | 9.6692  | 0.3779 | -109.4105 |
| log_s_Lactobacillus_vaginalis  | SmallVesselStroke   | Simple mode               | 11 | 0.9735 | 0.9159 | 1.0348 | 0.4093 | 0.0185  | 0.0193 | 0.3633 | 9.6692  | 0.3779 | -109.4105 |
| log_s_Lactobacillus_vaginalis  | SmallVesselStroke   | Weighted mode             | 11 | 0.9684 | 0.9257 | 1.0131 | 0.1933 | 0.0185  | 0.0193 | 0.3633 | 9.6692  | 0.3779 | -109.4105 |
| log_s_Lactobacillus_vaginalis  | Stroke              | MR Egger                  | 11 | 0.9833 | 0.9491 | 1.0188 | 0.3760 | 0.0049  | 0.0092 | 0.6046 | 7.5799  | 0.5770 | -339.7273 |
| log_s_Lactobacillus_vaginalis  | Stroke              | Weighted median           | 11 | 0.9862 | 0.9664 | 1.0063 | 0.1776 | 0.0049  | 0.0092 | 0.6046 | 7.5799  | 0.5770 | -339.7273 |
| log_s_Lactobacillus_vaginalis  | Stroke              | Inverse variance weighted | 11 | 0.9920 | 0.9777 | 1.0066 | 0.2822 | 0.0049  | 0.0092 | 0.6046 | 7.5799  | 0.5770 | -339.7273 |
| log_s_Lactobacillus_vaginalis  | Stroke              | Simple mode               | 11 | 1.0004 | 0.9660 | 1.0361 | 0.9810 | 0.0049  | 0.0092 | 0.6046 | 7.5799  | 0.5770 | -339.7273 |
| log_s_Lactobacillus_vaginalis  | Stroke              | Weighted mode             | 11 | 0.9776 | 0.9507 | 1.0054 | 0.1440 | 0.0049  | 0.0092 | 0.6046 | 7.5799  | 0.5770 | -339.7273 |
| log_s_Lawsonia_intracellularis | CardioEmbolicStroke | MR Egger                  | 5  | 1.1254 | 0.7732 | 1.6382 | 0.5809 | 0.0258  | 0.0933 | 0.8000 | 5.5831  | 0.1337 | -151.2948 |
| log_s_Lawsonia_intracellularis | CardioEmbolicStroke | Weighted median           | 5  | 1.1632 | 0.9978 | 1.3561 | 0.0534 | 0.0258  | 0.0933 | 0.8000 | 5.5831  | 0.1337 | -151.2948 |
| log_s_Lawsonia_intracellularis | CardioEmbolicStroke | Inverse variance weighted | 5  | 1.1816 | 1.0373 | 1.3460 | 0.0120 | 0.0258  | 0.0933 | 0.8000 | 5.5831  | 0.1337 | -151.2948 |
| log_s_Lawsonia_intracellularis | CardioEmbolicStroke | Simple mode               | 5  | 1.2633 | 0.9957 | 1.6027 | 0.1266 | 0.0258  | 0.0933 | 0.8000 | 5.5831  | 0.1337 | -151.2948 |
| log_s_Lawsonia_intracellularis | CardioEmbolicStroke | Weighted mode             | 5  | 1.1639 | 0.9734 | 1.3918 | 0.1713 | 0.0258  | 0.0933 | 0.8000 | 5.5831  | 0.1337 | -151.2948 |
| log_s_Lawsonia_intracellularis | IschemicStroke      | MR Egger                  | 7  | 1.0082 | 0.9509 | 1.0691 | 0.7948 | 0.0051  | 0.0143 | 0.7352 | 4.6158  | 0.4645 | -590.6480 |
| log_s_Lawsonia_intracellularis | IschemicStroke      | Weighted median           | 7  | 1.0206 | 0.9897 | 1.0525 | 0.1941 | 0.0051  | 0.0143 | 0.7352 | 4.6158  | 0.4645 | -590.6480 |
| log_s_Lawsonia_intracellularis | IschemicStroke      | Inverse variance weighted | 7  | 1.0182 | 0.9958 | 1.0412 | 0.1120 | 0.0051  | 0.0143 | 0.7352 | 4.6158  | 0.4645 | -590.6480 |
| log_s_Lawsonia_intracellularis | IschemicStroke      | Simple mode               | 7  | 1.0204 | 0.9788 | 1.0638 | 0.3782 | 0.0051  | 0.0143 | 0.7352 | 4.6158  | 0.4645 | -590.6480 |
| log_s_Lawsonia_intracellularis | IschemicStroke      | Weighted mode             | 7  | 1.0157 | 0.9766 | 1.0564 | 0.4659 | 0.0051  | 0.0143 | 0.7352 | 4.6158  | 0.4645 | -590.6480 |
| log_s_Lawsonia_intracellularis | LargeArteryStroke   | MR Egger                  | 6  | 1.0770 | 0.8898 | 1.3035 | 0.4887 | -0.0252 | 0.0488 | 0.6330 | 0.4320  | 0.9944 | -343.4520 |
| log_s_Lawsonia_intracellularis | LargeArteryStroke   | Weighted median           | 6  | 1.0360 | 0.9400 | 1.1418 | 0.4754 | -0.0252 | 0.0488 | 0.6330 | 0.4320  | 0.9944 | -343.4520 |
| log_s_Lawsonia_intracellularis | LargeArteryStroke   | Inverse variance weighted | 6  | 1.0287 | 0.9517 | 1.1119 | 0.4762 | -0.0252 | 0.0488 | 0.6330 | 0.4320  | 0.9944 | -343.4520 |
| log_s_Lawsonia_intracellularis | LargeArteryStroke   | Simple mode               | 6  | 1.0333 | 0.9090 | 1.1747 | 0.6374 | -0.0252 | 0.0488 | 0.6330 | 0.4320  | 0.9944 | -343.4520 |
| log_s_Lawsonia_intracellularis | LargeArteryStroke   | Weighted mode             | 6  | 1.0456 | 0.9304 | 1.1751 | 0.4878 | -0.0252 | 0.0488 | 0.6330 | 0.4320  | 0.9944 | -343.4520 |
| log_s_Lawsonia_intracellularis | SmallVesselStroke   | MR Egger                  | 6  | 1.0368 | 0.8978 | 1.1974 | 0.6483 | 0.0009  | 0.0368 | 0.9807 | 7.3945  | 0.1165 | -243.2648 |
| log_s_Lawsonia_intracellularis | SmallVesselStroke   | Weighted median           | 6  | 1.0427 | 0.9809 | 1.1085 | 0.1799 | 0.0009  | 0.0368 | 0.9807 | 7.3945  | 0.1165 | -243.2648 |
| log_s_Lawsonia_intracellularis | SmallVesselStroke   | Inverse variance weighted | 6  | 1.0386 | 0.9855 | 1.0946 | 0.1573 | 0.0009  | 0.0368 | 0.9807 | 7.3945  | 0.1165 | -243.2648 |
| log_s_Lawsonia_intracellularis | SmallVesselStroke   | Simple mode               | 6  | 1.0504 | 0.9731 | 1.1339 | 0.2628 | 0.0009  | 0.0368 | 0.9807 | 7.3945  | 0.1165 | -243.2648 |
| log_s_Lawsonia_intracellularis | SmallVesselStroke   | Weighted mode             | 6  | 1.0437 | 0.9770 | 1.1150 | 0.2603 | 0.0009  | 0.0368 | 0.9807 | 7.3945  | 0.1165 | -243.2648 |
| log_s_Lawsonia_intracellularis | Stroke              | MR Egger                  | 7  | 0.9927 | 0.9298 | 1.0598 | 0.8341 | 0.0108  | 0.0158 | 0.5251 | 7.8969  | 0.1620 | -522.9973 |
| log_s_Lawsonia_intracellularis | Stroke              | Weighted median           | 7  | 1.0141 | 0.9876 | 1.0412 | 0.3004 | 0.0108  | 0.0158 | 0.5251 | 7.8969  | 0.1620 | -522.9973 |
| log_s_Lawsonia_intracellularis | Stroke              | Inverse variance weighted | 7  | 1.0139 | 0.9907 | 1.0376 | 0.2418 | 0.0108  | 0.0158 | 0.5251 | 7.8969  | 0.1620 | -522.9973 |

|                                   |                     |                           |    |        |        |        |        |         |        |        |         |        |           |
|-----------------------------------|---------------------|---------------------------|----|--------|--------|--------|--------|---------|--------|--------|---------|--------|-----------|
| log_s_Lawsonia_intracellularis    | Stroke              | Simple mode               | 7  | 1.0204 | 0.9744 | 1.0684 | 0.4237 | 0.0108  | 0.0158 | 0.5251 | 7.8969  | 0.1620 | -522.9973 |
| log_s_Lawsonia_intracellularis    | Stroke              | Weighted mode             | 7  | 1.0134 | 0.9787 | 1.0493 | 0.4829 | 0.0108  | 0.0158 | 0.5251 | 7.8969  | 0.1620 | -522.9973 |
| log_s_Leuconostoc_mesenteroides   | CardioEmbolicStroke | MR Egger                  | 11 | 1.1063 | 0.6355 | 1.9256 | 0.7292 | -0.0483 | 0.1289 | 0.7163 | 13.5620 | 0.1388 | -79.0572  |
| log_s_Leuconostoc_mesenteroides   | CardioEmbolicStroke | Weighted median           | 11 | 1.0130 | 0.9035 | 1.1358 | 0.8250 | -0.0483 | 0.1289 | 0.7163 | 13.5620 | 0.1388 | -79.0572  |
| log_s_Leuconostoc_mesenteroides   | CardioEmbolicStroke | Inverse variance weighted | 11 | 0.9967 | 0.9062 | 1.0962 | 0.9452 | -0.0483 | 0.1289 | 0.7163 | 13.5620 | 0.1388 | -79.0572  |
| log_s_Leuconostoc_mesenteroides   | CardioEmbolicStroke | Simple mode               | 11 | 1.0179 | 0.8343 | 1.2420 | 0.8645 | -0.0483 | 0.1289 | 0.7163 | 13.5620 | 0.1388 | -79.0572  |
| log_s_Leuconostoc_mesenteroides   | CardioEmbolicStroke | Weighted mode             | 11 | 1.0145 | 0.8363 | 1.2306 | 0.8870 | -0.0483 | 0.1289 | 0.7163 | 13.5620 | 0.1388 | -79.0572  |
| log_s_Leuconostoc_mesenteroides   | IschemicStroke      | MR Egger                  | 13 | 1.0313 | 0.9612 | 1.1064 | 0.4094 | -0.0158 | 0.0171 | 0.3747 | 6.5441  | 0.8862 | -147.4519 |
| log_s_Leuconostoc_mesenteroides   | IschemicStroke      | Weighted median           | 13 | 1.0018 | 0.9787 | 1.0255 | 0.8797 | -0.0158 | 0.0171 | 0.3747 | 6.5441  | 0.8862 | -147.4519 |
| log_s_Leuconostoc_mesenteroides   | IschemicStroke      | Inverse variance weighted | 13 | 0.9986 | 0.9811 | 1.0165 | 0.8807 | -0.0158 | 0.0171 | 0.3747 | 6.5441  | 0.8862 | -147.4519 |
| log_s_Leuconostoc_mesenteroides   | IschemicStroke      | Simple mode               | 13 | 0.9993 | 0.9634 | 1.0366 | 0.9715 | -0.0158 | 0.0171 | 0.3747 | 6.5441  | 0.8862 | -147.4519 |
| log_s_Leuconostoc_mesenteroides   | IschemicStroke      | Weighted mode             | 13 | 1.0008 | 0.9671 | 1.0357 | 0.9638 | -0.0158 | 0.0171 | 0.3747 | 6.5441  | 0.8862 | -147.4519 |
| log_s_Leuconostoc_mesenteroides   | LargeArteryStroke   | MR Egger                  | 11 | 1.0600 | 0.7558 | 1.4868 | 0.7434 | -0.0185 | 0.0787 | 0.8197 | 4.2388  | 0.8950 | -224.3478 |
| log_s_Leuconostoc_mesenteroides   | LargeArteryStroke   | Weighted median           | 11 | 1.0289 | 0.9528 | 1.1110 | 0.4677 | -0.0185 | 0.0787 | 0.8197 | 4.2388  | 0.8950 | -224.3478 |
| log_s_Leuconostoc_mesenteroides   | LargeArteryStroke   | Inverse variance weighted | 11 | 1.0186 | 0.9585 | 1.0825 | 0.5526 | -0.0185 | 0.0787 | 0.8197 | 4.2388  | 0.8950 | -224.3478 |
| log_s_Leuconostoc_mesenteroides   | LargeArteryStroke   | Simple mode               | 11 | 1.0314 | 0.9098 | 1.1694 | 0.6394 | -0.0185 | 0.0787 | 0.8197 | 4.2388  | 0.8950 | -224.3478 |
| log_s_Leuconostoc_mesenteroides   | LargeArteryStroke   | Weighted mode             | 11 | 1.0382 | 0.9206 | 1.1709 | 0.5544 | -0.0185 | 0.0787 | 0.8197 | 4.2388  | 0.8950 | -224.3478 |
| log_s_Leuconostoc_mesenteroides   | SmallVesselStroke   | MR Egger                  | 11 | 1.0105 | 0.8377 | 1.2190 | 0.9153 | 0.0030  | 0.0437 | 0.9467 | 6.1219  | 0.7277 | -382.6228 |
| log_s_Leuconostoc_mesenteroides   | SmallVesselStroke   | Weighted median           | 11 | 1.0182 | 0.9754 | 1.0629 | 0.4093 | 0.0030  | 0.0437 | 0.9467 | 6.1219  | 0.7277 | -382.6228 |
| log_s_Leuconostoc_mesenteroides   | SmallVesselStroke   | Inverse variance weighted | 11 | 1.0171 | 0.9834 | 1.0519 | 0.3243 | 0.0030  | 0.0437 | 0.9467 | 6.1219  | 0.7277 | -382.6228 |
| log_s_Leuconostoc_mesenteroides   | SmallVesselStroke   | Simple mode               | 11 | 1.0060 | 0.9343 | 1.0833 | 0.8764 | 0.0030  | 0.0437 | 0.9467 | 6.1219  | 0.7277 | -382.6228 |
| log_s_Leuconostoc_mesenteroides   | SmallVesselStroke   | Weighted mode             | 11 | 1.0097 | 0.9447 | 1.0792 | 0.7822 | 0.0030  | 0.0437 | 0.9467 | 6.1219  | 0.7277 | -382.6228 |
| log_s_Leuconostoc_mesenteroides   | Stroke              | MR Egger                  | 13 | 1.0002 | 0.9417 | 1.0624 | 0.9942 | -0.0024 | 0.0147 | 0.8748 | 6.8083  | 0.8144 | -231.7837 |
| log_s_Leuconostoc_mesenteroides   | Stroke              | Weighted median           | 13 | 1.0049 | 0.9841 | 1.0260 | 0.6477 | -0.0024 | 0.0147 | 0.8748 | 6.8083  | 0.8144 | -231.7837 |
| log_s_Leuconostoc_mesenteroides   | Stroke              | Inverse variance weighted | 13 | 0.9954 | 0.9804 | 1.0108 | 0.5575 | -0.0024 | 0.0147 | 0.8748 | 6.8083  | 0.8144 | -231.7837 |
| log_s_Leuconostoc_mesenteroides   | Stroke              | Simple mode               | 13 | 1.0096 | 0.9766 | 1.0437 | 0.5833 | -0.0024 | 0.0147 | 0.8748 | 6.8083  | 0.8144 | -231.7837 |
| log_s_Leuconostoc_mesenteroides   | Stroke              | Weighted mode             | 13 | 1.0096 | 0.9784 | 1.0418 | 0.5626 | -0.0024 | 0.0147 | 0.8748 | 6.8083  | 0.8144 | -231.7837 |
| log_s_Methylobacillus_flagellatus | CardioEmbolicStroke | MR Egger                  | 12 | 0.8993 | 0.5986 | 1.3511 | 0.6205 | 0.0505  | 0.0968 | 0.6133 | 11.4524 | 0.3234 | -43.6824  |
| log_s_Methylobacillus_flagellatus | CardioEmbolicStroke | Weighted median           | 12 | 0.9976 | 0.8890 | 1.1195 | 0.9677 | 0.0505  | 0.0968 | 0.6133 | 11.4524 | 0.3234 | -43.6824  |
| log_s_Methylobacillus_flagellatus | CardioEmbolicStroke | Inverse variance weighted | 12 | 0.9995 | 0.9158 | 1.0909 | 0.9912 | 0.0505  | 0.0968 | 0.6133 | 11.4524 | 0.3234 | -43.6824  |
| log_s_Methylobacillus_flagellatus | CardioEmbolicStroke | Simple mode               | 12 | 1.0210 | 0.8484 | 1.2287 | 0.8299 | 0.0505  | 0.0968 | 0.6133 | 11.4524 | 0.3234 | -43.6824  |
| log_s_Methylobacillus_flagellatus | CardioEmbolicStroke | Weighted mode             | 12 | 1.0252 | 0.8579 | 1.2251 | 0.7892 | 0.0505  | 0.0968 | 0.6133 | 11.4524 | 0.3234 | -43.6824  |
| log_s_Methylobacillus_flagellatus | IschemicStroke      | MR Egger                  | 14 | 1.0064 | 0.9425 | 1.0747 | 0.8519 | 0.0093  | 0.0160 | 0.5738 | 11.1262 | 0.5181 | -125.5332 |
| log_s_Methylobacillus_flagellatus | IschemicStroke      | Weighted median           | 14 | 1.0143 | 0.9889 | 1.0404 | 0.2725 | 0.0093  | 0.0160 | 0.5738 | 11.1262 | 0.5181 | -125.5332 |
| log_s_Methylobacillus_flagellatus | IschemicStroke      | Inverse variance weighted | 14 | 1.0253 | 1.0071 | 1.0439 | 0.0062 | 0.0093  | 0.0160 | 0.5738 | 11.1262 | 0.5181 | -125.5332 |
| log_s_Methylobacillus_flagellatus | IschemicStroke      | Simple mode               | 14 | 1.0118 | 0.9670 | 1.0587 | 0.6191 | 0.0093  | 0.0160 | 0.5738 | 11.1262 | 0.5181 | -125.5332 |
| log_s_Methylobacillus_flagellatus | IschemicStroke      | Weighted mode             | 14 | 1.0105 | 0.9651 | 1.0580 | 0.6624 | 0.0093  | 0.0160 | 0.5738 | 11.1262 | 0.5181 | -125.5332 |
| log_s_Methylobacillus_flagellatus | LargeArteryStroke   | MR Egger                  | 13 | 0.8215 | 0.6613 | 1.0205 | 0.1033 | 0.1029  | 0.0536 | 0.0814 | 10.0315 | 0.6132 | -21.2071  |
| log_s_Methylobacillus_flagellatus | LargeArteryStroke   | Weighted median           | 13 | 0.9860 | 0.9080 | 1.0708 | 0.7382 | 0.1029  | 0.0536 | 0.0814 | 10.0315 | 0.6132 | -21.2071  |
| log_s_Methylobacillus_flagellatus | LargeArteryStroke   | Inverse variance weighted | 13 | 1.0073 | 0.9481 | 1.0702 | 0.8145 | 0.1029  | 0.0536 | 0.0814 | 10.0315 | 0.6132 | -21.2071  |
| log_s_Methylobacillus_flagellatus | LargeArteryStroke   | Simple mode               | 13 | 0.9664 | 0.8318 | 1.1228 | 0.6631 | 0.1029  | 0.0536 | 0.0814 | 10.0315 | 0.6132 | -21.2071  |
| log_s_Methylobacillus_flagellatus | LargeArteryStroke   | Weighted mode             | 13 | 0.9704 | 0.8448 | 1.1146 | 0.6781 | 0.1029  | 0.0536 | 0.0814 | 10.0315 | 0.6132 | -21.2071  |
| log_s_Methylobacillus_flagellatus | SmallVesselStroke   | MR Egger                  | 13 | 1.0337 | 0.9033 | 1.1830 | 0.6393 | -0.0084 | 0.0333 | 0.8067 | 13.6943 | 0.2504 | -61.3204  |
| log_s_Methylobacillus_flagellatus | SmallVesselStroke   | Weighted median           | 13 | 1.0070 | 0.9610 | 1.0552 | 0.7694 | -0.0084 | 0.0333 | 0.8067 | 13.6943 | 0.2504 | -61.3204  |
| log_s_Methylobacillus_flagellatus | SmallVesselStroke   | Inverse variance weighted | 13 | 1.0167 | 0.9806 | 1.0542 | 0.3690 | -0.0084 | 0.0333 | 0.8067 | 13.6943 | 0.2504 | -61.3204  |
| log_s_Methylobacillus_flagellatus | SmallVesselStroke   | Simple mode               | 13 | 1.0021 | 0.9185 | 1.0934 | 0.9623 | -0.0084 | 0.0333 | 0.8067 | 13.6943 | 0.2504 | -61.3204  |
| log_s_Methylobacillus_flagellatus | SmallVesselStroke   | Weighted mode             | 13 | 1.0040 | 0.9333 | 1.0801 | 0.9160 | -0.0084 | 0.0333 | 0.8067 | 13.6943 | 0.2504 | -61.3204  |
| log_s_Methylobacillus_flagellatus | Stroke              | MR Egger                  | 16 | 0.9836 | 0.9322 | 1.0378 | 0.5544 | 0.0175  | 0.0131 | 0.2021 | 12.1061 | 0.6710 | -133.5235 |
| log_s_Methylobacillus_flagellatus | Stroke              | Weighted median           | 16 | 1.0139 | 0.9927 | 1.0356 | 0.2015 | 0.0175  | 0.0131 | 0.2021 | 12.1061 | 0.6710 | -133.5235 |
| log_s_Methylobacillus_flagellatus | Stroke              | Inverse variance weighted | 16 | 1.0188 | 1.0040 | 1.0339 | 0.0126 | 0.0175  | 0.0131 | 0.2021 | 12.1061 | 0.6710 | -133.5235 |
| log_s_Methylobacillus_flagellatus | Stroke              | Simple mode               | 16 | 1.0119 | 0.9758 | 1.0494 | 0.5323 | 0.0175  | 0.0131 | 0.2021 | 12.1061 | 0.6710 | -133.5235 |
| log_s_Methylobacillus_flagellatus | Stroke              | Weighted mode             | 16 | 1.0093 | 0.9758 | 1.0439 | 0.5984 | 0.0175  | 0.0131 | 0.2021 | 12.1061 | 0.6710 | -133.5235 |
| log_s_Mobiluncus_mulieris         | CardioEmbolicStroke | MR Egger                  | 7  | 1.0180 | 0.7048 | 1.4705 | 0.9279 | -0.0187 | 0.0842 | 0.8332 | 6.0576  | 0.3007 | -302.7102 |

|                             |                     |                           |    |        |        |        |        |         |        |        |         |        |           |
|-----------------------------|---------------------|---------------------------|----|--------|--------|--------|--------|---------|--------|--------|---------|--------|-----------|
| log_s_Mobiluncus_mulieris   | CardioEmbolicStroke | Weighted median           | 7  | 0.9543 | 0.8288 | 1.0988 | 0.5155 | -0.0187 | 0.0842 | 0.8332 | 6.0576  | 0.3007 | -302.7102 |
| log_s_Mobiluncus_mulieris   | CardioEmbolicStroke | Inverse variance weighted | 7  | 0.9784 | 0.8831 | 1.0841 | 0.6770 | -0.0187 | 0.0842 | 0.8332 | 6.0576  | 0.3007 | -302.7102 |
| log_s_Mobiluncus_mulieris   | CardioEmbolicStroke | Simple mode               | 7  | 0.9519 | 0.7868 | 1.1516 | 0.6298 | -0.0187 | 0.0842 | 0.8332 | 6.0576  | 0.3007 | -302.7102 |
| log_s_Mobiluncus_mulieris   | CardioEmbolicStroke | Weighted mode             | 7  | 0.9505 | 0.8162 | 1.1070 | 0.5383 | -0.0187 | 0.0842 | 0.8332 | 6.0576  | 0.3007 | -302.7102 |
| log_s_Mobiluncus_mulieris   | IschemicStroke      | MR Egger                  | 10 | 1.0260 | 0.9722 | 1.0828 | 0.3781 | -0.0129 | 0.0138 | 0.3792 | 8.2718  | 0.4074 | -202.6199 |
| log_s_Mobiluncus_mulieris   | IschemicStroke      | Weighted median           | 10 | 1.0002 | 0.9725 | 1.0287 | 0.9873 | -0.0129 | 0.0138 | 0.3792 | 8.2718  | 0.4074 | -202.6199 |
| log_s_Mobiluncus_mulieris   | IschemicStroke      | Inverse variance weighted | 10 | 1.0020 | 0.9818 | 1.0225 | 0.8485 | -0.0129 | 0.0138 | 0.3792 | 8.2718  | 0.4074 | -202.6199 |
| log_s_Mobiluncus_mulieris   | IschemicStroke      | Simple mode               | 10 | 1.0043 | 0.9614 | 1.0490 | 0.8530 | -0.0129 | 0.0138 | 0.3792 | 8.2718  | 0.4074 | -202.6199 |
| log_s_Mobiluncus_mulieris   | IschemicStroke      | Weighted mode             | 10 | 1.0020 | 0.9681 | 1.0371 | 0.9113 | -0.0129 | 0.0138 | 0.3792 | 8.2718  | 0.4074 | -202.6199 |
| log_s_Mobiluncus_mulieris   | LargeArteryStroke   | MR Egger                  | 9  | 0.9679 | 0.8128 | 1.1526 | 0.7253 | 0.0115  | 0.0444 | 0.8034 | 6.0281  | 0.5365 | -115.3043 |
| log_s_Mobiluncus_mulieris   | LargeArteryStroke   | Weighted median           | 9  | 0.9742 | 0.8926 | 1.0632 | 0.5573 | 0.0115  | 0.0444 | 0.8034 | 6.0281  | 0.5365 | -115.3043 |
| log_s_Mobiluncus_mulieris   | LargeArteryStroke   | Inverse variance weighted | 9  | 0.9888 | 0.9256 | 1.0563 | 0.7381 | 0.0115  | 0.0444 | 0.8034 | 6.0281  | 0.5365 | -115.3043 |
| log_s_Mobiluncus_mulieris   | LargeArteryStroke   | Simple mode               | 9  | 0.9688 | 0.8607 | 1.0905 | 0.6141 | 0.0115  | 0.0444 | 0.8034 | 6.0281  | 0.5365 | -115.3043 |
| log_s_Mobiluncus_mulieris   | LargeArteryStroke   | Weighted mode             | 9  | 0.9726 | 0.8683 | 1.0894 | 0.6439 | 0.0115  | 0.0444 | 0.8034 | 6.0281  | 0.5365 | -115.3043 |
| log_s_Mobiluncus_mulieris   | SmallVesselStroke   | MR Egger                  | 9  | 1.1068 | 1.0041 | 1.2201 | 0.0805 | -0.0493 | 0.0247 | 0.0866 | 8.9549  | 0.3461 | -95.1100  |
| log_s_Mobiluncus_mulieris   | SmallVesselStroke   | Weighted median           | 9  | 0.9988 | 0.9487 | 1.0516 | 0.9644 | -0.0493 | 0.0247 | 0.0866 | 8.9549  | 0.3461 | -95.1100  |
| log_s_Mobiluncus_mulieris   | SmallVesselStroke   | Inverse variance weighted | 9  | 1.0099 | 0.9712 | 1.0500 | 0.6218 | -0.0493 | 0.0247 | 0.0866 | 8.9549  | 0.3461 | -95.1100  |
| log_s_Mobiluncus_mulieris   | SmallVesselStroke   | Simple mode               | 9  | 0.9807 | 0.9074 | 1.0600 | 0.6368 | -0.0493 | 0.0247 | 0.0866 | 8.9549  | 0.3461 | -95.1100  |
| log_s_Mobiluncus_mulieris   | SmallVesselStroke   | Weighted mode             | 9  | 0.9969 | 0.9313 | 1.0672 | 0.9316 | -0.0493 | 0.0247 | 0.0866 | 8.9549  | 0.3461 | -95.1100  |
| log_s_Mobiluncus_mulieris   | Stroke              | MR Egger                  | 11 | 0.9995 | 0.9535 | 1.0477 | 0.9843 | -0.0031 | 0.0118 | 0.7955 | 8.3761  | 0.4967 | -278.9058 |
| log_s_Mobiluncus_mulieris   | Stroke              | Weighted median           | 11 | 0.9935 | 0.9696 | 1.0181 | 0.6017 | -0.0031 | 0.0118 | 0.7955 | 8.3761  | 0.4967 | -278.9058 |
| log_s_Mobiluncus_mulieris   | Stroke              | Inverse variance weighted | 11 | 0.9935 | 0.9769 | 1.0105 | 0.4536 | -0.0031 | 0.0118 | 0.7955 | 8.3761  | 0.4967 | -278.9058 |
| log_s_Mobiluncus_mulieris   | Stroke              | Simple mode               | 11 | 1.0173 | 0.9761 | 1.0601 | 0.4352 | -0.0031 | 0.0118 | 0.7955 | 8.3761  | 0.4967 | -278.9058 |
| log_s_Mobiluncus_mulieris   | Stroke              | Weighted mode             | 11 | 1.0146 | 0.9749 | 1.0559 | 0.4939 | -0.0031 | 0.0118 | 0.7955 | 8.3761  | 0.4967 | -278.9058 |
| log_s_Neisseria_flavescens  | CardioEmbolicStroke | MR Egger                  | 8  | 1.1270 | 0.8558 | 1.4842 | 0.4273 | -0.0452 | 0.0621 | 0.4944 | 1.4847  | 0.9828 | -176.2344 |
| log_s_Neisseria_flavescens  | CardioEmbolicStroke | Weighted median           | 8  | 1.0412 | 0.9279 | 1.1684 | 0.4920 | -0.0452 | 0.0621 | 0.4944 | 1.4847  | 0.9828 | -176.2344 |
| log_s_Neisseria_flavescens  | CardioEmbolicStroke | Inverse variance weighted | 8  | 1.0235 | 0.9337 | 1.1220 | 0.6195 | -0.0452 | 0.0621 | 0.4944 | 1.4847  | 0.9828 | -176.2344 |
| log_s_Neisseria_flavescens  | CardioEmbolicStroke | Simple mode               | 8  | 1.0507 | 0.9026 | 1.2232 | 0.5437 | -0.0452 | 0.0621 | 0.4944 | 1.4847  | 0.9828 | -176.2344 |
| log_s_Neisseria_flavescens  | CardioEmbolicStroke | Weighted mode             | 8  | 1.0574 | 0.8950 | 1.2494 | 0.5327 | -0.0452 | 0.0621 | 0.4944 | 1.4847  | 0.9828 | -176.2344 |
| log_s_Neisseria_flavescens  | IschemicStroke      | MR Egger                  | 10 | 1.0222 | 0.9566 | 1.0924 | 0.5346 | -0.0118 | 0.0155 | 0.4680 | 10.5971 | 0.2256 | -200.7331 |
| log_s_Neisseria_flavescens  | IschemicStroke      | Weighted median           | 10 | 1.0017 | 0.9745 | 1.0296 | 0.9060 | -0.0118 | 0.0155 | 0.4680 | 10.5971 | 0.2256 | -200.7331 |
| log_s_Neisseria_flavescens  | IschemicStroke      | Inverse variance weighted | 10 | 0.9978 | 0.9755 | 1.0207 | 0.8489 | -0.0118 | 0.0155 | 0.4680 | 10.5971 | 0.2256 | -200.7331 |
| log_s_Neisseria_flavescens  | IschemicStroke      | Simple mode               | 10 | 0.9991 | 0.9529 | 1.0476 | 0.9719 | -0.0118 | 0.0155 | 0.4680 | 10.5971 | 0.2256 | -200.7331 |
| log_s_Neisseria_flavescens  | IschemicStroke      | Weighted mode             | 10 | 1.0029 | 0.9593 | 1.0485 | 0.9011 | -0.0118 | 0.0155 | 0.4680 | 10.5971 | 0.2256 | -200.7331 |
| log_s_Neisseria_flavescens  | LargeArteryStroke   | MR Egger                  | 9  | 0.9402 | 0.7667 | 1.1530 | 0.5723 | 0.0115  | 0.0477 | 0.8170 | 8.5004  | 0.2905 | -61.4373  |
| log_s_Neisseria_flavescens  | LargeArteryStroke   | Weighted median           | 9  | 0.9510 | 0.8696 | 1.0401 | 0.2716 | 0.0115  | 0.0477 | 0.8170 | 8.5004  | 0.2905 | -61.4373  |
| log_s_Neisseria_flavescens  | LargeArteryStroke   | Inverse variance weighted | 9  | 0.9625 | 0.8997 | 1.0297 | 0.2667 | 0.0115  | 0.0477 | 0.8170 | 8.5004  | 0.2905 | -61.4373  |
| log_s_Neisseria_flavescens  | LargeArteryStroke   | Simple mode               | 9  | 0.9575 | 0.8278 | 1.1076 | 0.5752 | 0.0115  | 0.0477 | 0.8170 | 8.5004  | 0.2905 | -61.4373  |
| log_s_Neisseria_flavescens  | LargeArteryStroke   | Weighted mode             | 9  | 0.9532 | 0.8337 | 1.0899 | 0.5033 | 0.0115  | 0.0477 | 0.8170 | 8.5004  | 0.2905 | -61.4373  |
| log_s_Neisseria_flavescens  | SmallVesselStroke   | MR Egger                  | 9  | 1.0988 | 0.9868 | 1.2235 | 0.1296 | -0.0382 | 0.0252 | 0.1742 | 10.4361 | 0.2357 | -101.7190 |
| log_s_Neisseria_flavescens  | SmallVesselStroke   | Weighted median           | 9  | 0.9855 | 0.9367 | 1.0369 | 0.5735 | -0.0382 | 0.0252 | 0.1742 | 10.4361 | 0.2357 | -101.7190 |
| log_s_Neisseria_flavescens  | SmallVesselStroke   | Inverse variance weighted | 9  | 1.0168 | 0.9757 | 1.0596 | 0.4278 | -0.0382 | 0.0252 | 0.1742 | 10.4361 | 0.2357 | -101.7190 |
| log_s_Neisseria_flavescens  | SmallVesselStroke   | Simple mode               | 9  | 0.9673 | 0.8856 | 1.0567 | 0.4821 | -0.0382 | 0.0252 | 0.1742 | 10.4361 | 0.2357 | -101.7190 |
| log_s_Neisseria_flavescens  | SmallVesselStroke   | Weighted mode             | 9  | 0.9673 | 0.8790 | 1.0645 | 0.5158 | -0.0382 | 0.0252 | 0.1742 | 10.4361 | 0.2357 | -101.7190 |
| log_s_Neisseria_flavescens  | Stroke              | MR Egger                  | 10 | 1.0217 | 0.9696 | 1.0765 | 0.4448 | -0.0116 | 0.0123 | 0.3708 | 9.0747  | 0.3360 | -244.7286 |
| log_s_Neisseria_flavescens  | Stroke              | Weighted median           | 10 | 0.9907 | 0.9678 | 1.0142 | 0.4352 | -0.0116 | 0.0123 | 0.3708 | 9.0747  | 0.3360 | -244.7286 |
| log_s_Neisseria_flavescens  | Stroke              | Inverse variance weighted | 10 | 0.9977 | 0.9798 | 1.0159 | 0.8055 | -0.0116 | 0.0123 | 0.3708 | 9.0747  | 0.3360 | -244.7286 |
| log_s_Neisseria_flavescens  | Stroke              | Simple mode               | 10 | 0.9838 | 0.9429 | 1.0265 | 0.4702 | -0.0116 | 0.0123 | 0.3708 | 9.0747  | 0.3360 | -244.7286 |
| log_s_Neisseria_flavescens  | Stroke              | Weighted mode             | 10 | 0.9841 | 0.9457 | 1.0241 | 0.4509 | -0.0116 | 0.0123 | 0.3708 | 9.0747  | 0.3360 | -244.7286 |
| log_s_Neisseria_gonorrhoeae | CardioEmbolicStroke | MR Egger                  | 6  | 0.8294 | 0.4495 | 1.5301 | 0.5816 | 0.0777  | 0.1267 | 0.5731 | 6.2021  | 0.1846 | -468.2769 |
| log_s_Neisseria_gonorrhoeae | CardioEmbolicStroke | Weighted median           | 6  | 0.9400 | 0.8058 | 1.0965 | 0.4311 | 0.0777  | 0.1267 | 0.5731 | 6.2021  | 0.1846 | -468.2769 |
| log_s_Neisseria_gonorrhoeae | CardioEmbolicStroke | Inverse variance weighted | 6  | 0.9989 | 0.8718 | 1.1446 | 0.9876 | 0.0777  | 0.1267 | 0.5731 | 6.2021  | 0.1846 | -468.2769 |
| log_s_Neisseria_gonorrhoeae | CardioEmbolicStroke | Simple mode               | 6  | 0.8995 | 0.7257 | 1.1148 | 0.3777 | 0.0777  | 0.1267 | 0.5731 | 6.2021  | 0.1846 | -468.2769 |

|                              |                     |                           |    |        |        |        |        |         |        |        |         |        |                |
|------------------------------|---------------------|---------------------------|----|--------|--------|--------|--------|---------|--------|--------|---------|--------|----------------|
| log_s_Neisseria_gonorrhoeae  | CardioEmbolicStroke | Weighted mode             | 6  | 0.9074 | 0.7236 | 1.1379 | 0.4386 | 0.0777  | 0.1267 | 0.5731 | 6.2021  | 0.1846 | -468.2769      |
| log_s_Neisseria_gonorrhoeae  | IschemicStroke      | MR Egger                  | 9  | 0.9585 | 0.8256 | 1.1129 | 0.5955 | 0.0322  | 0.0325 | 0.3548 | 27.4938 | 0.0006 | -253.0560      |
| log_s_Neisseria_gonorrhoeae  | IschemicStroke      | Weighted median           | 9  | 1.0179 | 0.9829 | 1.0542 | 0.3193 | 0.0322  | 0.0325 | 0.3548 | 27.4938 | 0.0006 | -253.0560      |
| log_s_Neisseria_gonorrhoeae  | IschemicStroke      | Inverse variance weighted | 9  | 1.0303 | 0.9865 | 1.0761 | 0.1785 | 0.0322  | 0.0325 | 0.3548 | 27.4938 | 0.0006 | -253.0560      |
| log_s_Neisseria_gonorrhoeae  | IschemicStroke      | Simple mode               | 9  | 1.0187 | 0.9713 | 1.0684 | 0.4674 | 0.0322  | 0.0325 | 0.3548 | 27.4938 | 0.0006 | -253.0560      |
| log_s_Neisseria_gonorrhoeae  | IschemicStroke      | Weighted mode             | 9  | 1.0233 | 0.9767 | 1.0721 | 0.3608 | 0.0322  | 0.0325 | 0.3548 | 27.4938 | 0.0006 | -253.0560      |
| log_s_Neisseria_gonorrhoeae  | LargeArteryStroke   | MR Egger                  | 7  | 1.1736 | 0.8498 | 1.6209 | 0.3757 | -0.0116 | 0.0708 | 0.8762 | 7.5380  | 0.1836 | -44.3276       |
| log_s_Neisseria_gonorrhoeae  | LargeArteryStroke   | Weighted median           | 7  | 1.0750 | 0.9554 | 1.2096 | 0.2294 | -0.0116 | 0.0708 | 0.8762 | 7.5380  | 0.1836 | -44.3276       |
| log_s_Neisseria_gonorrhoeae  | LargeArteryStroke   | Inverse variance weighted | 7  | 1.1439 | 1.0439 | 1.2535 | 0.0040 | -0.0116 | 0.0708 | 0.8762 | 7.5380  | 0.1836 | -44.3276       |
| log_s_Neisseria_gonorrhoeae  | LargeArteryStroke   | Simple mode               | 7  | 1.0442 | 0.8623 | 1.2645 | 0.6732 | -0.0116 | 0.0708 | 0.8762 | 7.5380  | 0.1836 | -44.3276       |
| log_s_Neisseria_gonorrhoeae  | LargeArteryStroke   | Weighted mode             | 7  | 1.0414 | 0.8829 | 1.2282 | 0.6472 | -0.0116 | 0.0708 | 0.8762 | 7.5380  | 0.1836 | -44.3276       |
| log_s_Neisseria_gonorrhoeae  | SmallVesselStroke   | MR Egger                  | 7  | 0.9851 | 0.7639 | 1.2704 | 0.9124 | 0.0125  | 0.0551 | 0.8300 | 13.7263 | 0.0174 | -279.0597      |
| log_s_Neisseria_gonorrhoeae  | SmallVesselStroke   | Weighted median           | 7  | 0.9823 | 0.9218 | 1.0467 | 0.5808 | 0.0125  | 0.0551 | 0.8300 | 13.7263 | 0.0174 | -279.0597      |
| log_s_Neisseria_gonorrhoeae  | SmallVesselStroke   | Inverse variance weighted | 7  | 1.0131 | 0.9451 | 1.0860 | 0.7138 | 0.0125  | 0.0551 | 0.8300 | 13.7263 | 0.0174 | -279.0597      |
| log_s_Neisseria_gonorrhoeae  | SmallVesselStroke   | Simple mode               | 7  | 0.9727 | 0.9026 | 1.0482 | 0.4951 | 0.0125  | 0.0551 | 0.8300 | 13.7263 | 0.0174 | -279.0597      |
| log_s_Neisseria_gonorrhoeae  | SmallVesselStroke   | Weighted mode             | 7  | 0.9700 | 0.8995 | 1.0461 | 0.4596 | 0.0125  | 0.0551 | 0.8300 | 13.7263 | 0.0174 | -279.0597      |
| log_s_Neisseria_gonorrhoeae  | Stroke              | MR Egger                  | 10 | 0.9500 | 0.8594 | 1.0500 | 0.3444 | 0.0332  | 0.0220 | 0.1689 | 23.7537 | 0.0047 | -299.1877      |
| log_s_Neisseria_gonorrhoeae  | Stroke              | Weighted median           | 10 | 1.0222 | 0.9944 | 1.0508 | 0.1185 | 0.0332  | 0.0220 | 0.1689 | 23.7537 | 0.0047 | -299.1877      |
| log_s_Neisseria_gonorrhoeae  | Stroke              | Inverse variance weighted | 10 | 1.0228 | 0.9912 | 1.0553 | 0.1588 | 0.0332  | 0.0220 | 0.1689 | 23.7537 | 0.0047 | -299.1877      |
| log_s_Neisseria_gonorrhoeae  | Stroke              | Simple mode               | 10 | 1.0194 | 0.9730 | 1.0679 | 0.4403 | 0.0332  | 0.0220 | 0.1689 | 23.7537 | 0.0047 | -299.1877      |
| log_s_Neisseria_gonorrhoeae  | Stroke              | Weighted mode             | 10 | 1.0225 | 0.9816 | 1.0651 | 0.3136 | 0.0332  | 0.0220 | 0.1689 | 23.7537 | 0.0047 | -299.1877      |
| log_s_Neisseria_meningitidis | CardioEmbolicStroke | MR Egger                  | 4  | 1.1582 | 0.6333 | 2.1182 | 0.6804 | -0.1029 | 0.1336 | 0.5217 | 1.3159  | 0.5179 | -96514637.5609 |
| log_s_Neisseria_meningitidis | CardioEmbolicStroke | Weighted median           | 4  | 0.9321 | 0.7854 | 1.1063 | 0.4214 | -0.1029 | 0.1336 | 0.5217 | 1.3159  | 0.5179 | -96514637.5609 |
| log_s_Neisseria_meningitidis | CardioEmbolicStroke | Inverse variance weighted | 4  | 0.9198 | 0.7971 | 1.0615 | 0.2529 | -0.1029 | 0.1336 | 0.5217 | 1.3159  | 0.5179 | -96514637.5609 |
| log_s_Neisseria_meningitidis | CardioEmbolicStroke | Simple mode               | 4  | 0.9439 | 0.7378 | 1.2076 | 0.6774 | -0.1029 | 0.1336 | 0.5217 | 1.3159  | 0.5179 | -96514637.5609 |
| log_s_Neisseria_meningitidis | CardioEmbolicStroke | Weighted mode             | 4  | 0.9426 | 0.7473 | 1.1890 | 0.6520 | -0.1029 | 0.1336 | 0.5217 | 1.3159  | 0.5179 | -96514637.5609 |
| log_s_Neisseria_meningitidis | IschemicStroke      | MR Egger                  | 5  | 1.0310 | 0.9224 | 1.1524 | 0.6280 | -0.0173 | 0.0263 | 0.5579 | 3.6738  | 0.2989 | -1539.6120     |
| log_s_Neisseria_meningitidis | IschemicStroke      | Weighted median           | 5  | 1.0104 | 0.9711 | 1.0513 | 0.6082 | -0.0173 | 0.0263 | 0.5579 | 3.6738  | 0.2989 | -1539.6120     |
| log_s_Neisseria_meningitidis | IschemicStroke      | Inverse variance weighted | 5  | 0.9950 | 0.9644 | 1.0265 | 0.7518 | -0.0173 | 0.0263 | 0.5579 | 3.6738  | 0.2989 | -1539.6120     |
| log_s_Neisseria_meningitidis | IschemicStroke      | Simple mode               | 5  | 1.0239 | 0.9598 | 1.0923 | 0.5132 | -0.0173 | 0.0263 | 0.5579 | 3.6738  | 0.2989 | -1539.6120     |
| log_s_Neisseria_meningitidis | IschemicStroke      | Weighted mode             | 5  | 1.0236 | 0.9580 | 1.0936 | 0.5287 | -0.0173 | 0.0263 | 0.5579 | 3.6738  | 0.2989 | -1539.6120     |
| log_s_Neisseria_meningitidis | LargeArteryStroke   | MR Egger                  | 5  | 1.2518 | 0.9040 | 1.7335 | 0.2692 | -0.1036 | 0.0769 | 0.2706 | 4.3413  | 0.3618 | -253.4663      |
| log_s_Neisseria_meningitidis | LargeArteryStroke   | Weighted median           | 5  | 0.9655 | 0.8486 | 1.0986 | 0.5942 | -0.1036 | 0.0769 | 0.2706 | 4.3413  | 0.3618 | -253.4663      |
| log_s_Neisseria_meningitidis | LargeArteryStroke   | Inverse variance weighted | 5  | 1.0113 | 0.9129 | 1.1203 | 0.8298 | -0.1036 | 0.0769 | 0.2706 | 4.3413  | 0.3618 | -253.4663      |
| log_s_Neisseria_meningitidis | LargeArteryStroke   | Simple mode               | 5  | 0.9426 | 0.7844 | 1.1326 | 0.5623 | -0.1036 | 0.0769 | 0.2706 | 4.3413  | 0.3618 | -253.4663      |
| log_s_Neisseria_meningitidis | LargeArteryStroke   | Weighted mode             | 5  | 0.9414 | 0.7921 | 1.1188 | 0.5305 | -0.1036 | 0.0769 | 0.2706 | 4.3413  | 0.3618 | -253.4663      |
| log_s_Neisseria_meningitidis | SmallVesselStroke   | MR Egger                  | 5  | 0.9328 | 0.7789 | 1.1170 | 0.5042 | 0.0376  | 0.0426 | 0.4427 | 1.6833  | 0.6407 | -1423.2696     |
| log_s_Neisseria_meningitidis | SmallVesselStroke   | Weighted median           | 5  | 0.9980 | 0.9300 | 1.0708 | 0.9548 | 0.0376  | 0.0426 | 0.4427 | 1.6833  | 0.6407 | -1423.2696     |
| log_s_Neisseria_meningitidis | SmallVesselStroke   | Inverse variance weighted | 5  | 1.0078 | 0.9542 | 1.0643 | 0.7814 | 0.0376  | 0.0426 | 0.4427 | 1.6833  | 0.6407 | -1423.2696     |
| log_s_Neisseria_meningitidis | SmallVesselStroke   | Simple mode               | 5  | 0.9887 | 0.9011 | 1.0848 | 0.8222 | 0.0376  | 0.0426 | 0.4427 | 1.6833  | 0.6407 | -1423.2696     |
| log_s_Neisseria_meningitidis | SmallVesselStroke   | Weighted mode             | 5  | 0.9863 | 0.8981 | 1.0831 | 0.7864 | 0.0376  | 0.0426 | 0.4427 | 1.6833  | 0.6407 | -1423.2696     |
| log_s_Neisseria_meningitidis | Stroke              | MR Egger                  | 6  | 1.0361 | 0.9405 | 1.1414 | 0.5120 | -0.0214 | 0.0234 | 0.4115 | 5.7069  | 0.2221 | -875.0922      |
| log_s_Neisseria_meningitidis | Stroke              | Weighted median           | 6  | 1.0116 | 0.9781 | 1.0463 | 0.5027 | -0.0214 | 0.0234 | 0.4115 | 5.7069  | 0.2221 | -875.0922      |
| log_s_Neisseria_meningitidis | Stroke              | Inverse variance weighted | 6  | 0.9924 | 0.9641 | 1.0216 | 0.6074 | -0.0214 | 0.0234 | 0.4115 | 5.7069  | 0.2221 | -875.0922      |
| log_s_Neisseria_meningitidis | Stroke              | Simple mode               | 6  | 1.0197 | 0.9662 | 1.0762 | 0.5091 | -0.0214 | 0.0234 | 0.4115 | 5.7069  | 0.2221 | -875.0922      |
| log_s_Neisseria_meningitidis | Stroke              | Weighted mode             | 6  | 1.0177 | 0.9607 | 1.0782 | 0.5762 | -0.0214 | 0.0234 | 0.4115 | 5.7069  | 0.2221 | -875.0922      |
| log_s_Neisseria_mucosa       | CardioEmbolicStroke | MR Egger                  | 10 | 0.9740 | 0.6940 | 1.3669 | 0.8826 | 0.0133  | 0.0727 | 0.8595 | 6.1593  | 0.6294 | -146.4619      |
| log_s_Neisseria_mucosa       | CardioEmbolicStroke | Weighted median           | 10 | 0.9707 | 0.8659 | 1.0882 | 0.6102 | 0.0133  | 0.0727 | 0.8595 | 6.1593  | 0.6294 | -146.4619      |
| log_s_Neisseria_mucosa       | CardioEmbolicStroke | Inverse variance weighted | 10 | 1.0042 | 0.9218 | 1.0940 | 0.9230 | 0.0133  | 0.0727 | 0.8595 | 6.1593  | 0.6294 | -146.4619      |
| log_s_Neisseria_mucosa       | CardioEmbolicStroke | Simple mode               | 10 | 0.9251 | 0.7606 | 1.1252 | 0.4558 | 0.0133  | 0.0727 | 0.8595 | 6.1593  | 0.6294 | -146.4619      |
| log_s_Neisseria_mucosa       | CardioEmbolicStroke | Weighted mode             | 10 | 0.9304 | 0.7724 | 1.1208 | 0.4670 | 0.0133  | 0.0727 | 0.8595 | 6.1593  | 0.6294 | -146.4619      |
| log_s_Neisseria_mucosa       | IschemicStroke      | MR Egger                  | 12 | 1.0086 | 0.9470 | 1.0741 | 0.7956 | -0.0092 | 0.0141 | 0.5313 | 10.6477 | 0.3856 | -202.5333      |
| log_s_Neisseria_mucosa       | IschemicStroke      | Weighted median           | 12 | 0.9963 | 0.9703 | 1.0231 | 0.7859 | -0.0092 | 0.0141 | 0.5313 | 10.6477 | 0.3856 | -202.5333      |

|                                   |                     |                           |    |        |        |        |        |         |        |        |         |        |           |
|-----------------------------------|---------------------|---------------------------|----|--------|--------|--------|--------|---------|--------|--------|---------|--------|-----------|
| log_s_Neisseria_mucosa            | IschemicStroke      | Inverse variance weighted | 12 | 0.9888 | 0.9704 | 1.0074 | 0.2368 | -0.0092 | 0.0141 | 0.5313 | 10.6477 | 0.3856 | -202.5333 |
| log_s_Neisseria_mucosa            | IschemicStroke      | Simple mode               | 12 | 1.0006 | 0.9624 | 1.0403 | 0.9771 | -0.0092 | 0.0141 | 0.5313 | 10.6477 | 0.3856 | -202.5333 |
| log_s_Neisseria_mucosa            | IschemicStroke      | Weighted mode             | 12 | 1.0002 | 0.9621 | 1.0399 | 0.9915 | -0.0092 | 0.0141 | 0.5313 | 10.6477 | 0.3856 | -202.5333 |
| log_s_Neisseria_mucosa            | LargeArteryStroke   | MR Egger                  | 12 | 1.0060 | 0.8256 | 1.2257 | 0.9542 | -0.0070 | 0.0443 | 0.8785 | 3.9292  | 0.9505 | -67.3506  |
| log_s_Neisseria_mucosa            | LargeArteryStroke   | Weighted median           | 12 | 1.0143 | 0.9364 | 1.0987 | 0.7276 | -0.0070 | 0.0443 | 0.8785 | 3.9292  | 0.9505 | -67.3506  |
| log_s_Neisseria_mucosa            | LargeArteryStroke   | Inverse variance weighted | 12 | 0.9909 | 0.9329 | 1.0525 | 0.7670 | -0.0070 | 0.0443 | 0.8785 | 3.9292  | 0.9505 | -67.3506  |
| log_s_Neisseria_mucosa            | LargeArteryStroke   | Simple mode               | 12 | 1.0268 | 0.9120 | 1.1560 | 0.6706 | -0.0070 | 0.0443 | 0.8785 | 3.9292  | 0.9505 | -67.3506  |
| log_s_Neisseria_mucosa            | LargeArteryStroke   | Weighted mode             | 12 | 1.0300 | 0.9214 | 1.1515 | 0.6130 | -0.0070 | 0.0443 | 0.8785 | 3.9292  | 0.9505 | -67.3506  |
| log_s_Neisseria_mucosa            | SmallVesselStroke   | MR Egger                  | 12 | 1.0184 | 0.9129 | 1.1360 | 0.7506 | -0.0140 | 0.0246 | 0.5806 | 8.2273  | 0.6066 | -91.7529  |
| log_s_Neisseria_mucosa            | SmallVesselStroke   | Weighted median           | 12 | 0.9842 | 0.9409 | 1.0295 | 0.4878 | -0.0140 | 0.0246 | 0.5806 | 8.2273  | 0.6066 | -91.7529  |
| log_s_Neisseria_mucosa            | SmallVesselStroke   | Inverse variance weighted | 12 | 0.9880 | 0.9554 | 1.0216 | 0.4790 | -0.0140 | 0.0246 | 0.5806 | 8.2273  | 0.6066 | -91.7529  |
| log_s_Neisseria_mucosa            | SmallVesselStroke   | Simple mode               | 12 | 0.9784 | 0.9076 | 1.0548 | 0.5812 | -0.0140 | 0.0246 | 0.5806 | 8.2273  | 0.6066 | -91.7529  |
| log_s_Neisseria_mucosa            | SmallVesselStroke   | Weighted mode             | 12 | 0.9860 | 0.9172 | 1.0600 | 0.7107 | -0.0140 | 0.0246 | 0.5806 | 8.2273  | 0.6066 | -91.7529  |
| log_s_Neisseria_mucosa            | Stroke              | MR Egger                  | 12 | 1.0018 | 0.9526 | 1.0536 | 0.9451 | -0.0049 | 0.0114 | 0.6740 | 9.0284  | 0.5294 | -312.0880 |
| log_s_Neisseria_mucosa            | Stroke              | Weighted median           | 12 | 0.9914 | 0.9700 | 1.0133 | 0.4375 | -0.0049 | 0.0114 | 0.6740 | 9.0284  | 0.5294 | -312.0880 |
| log_s_Neisseria_mucosa            | Stroke              | Inverse variance weighted | 12 | 0.9913 | 0.9757 | 1.0071 | 0.2766 | -0.0049 | 0.0114 | 0.6740 | 9.0284  | 0.5294 | -312.0880 |
| log_s_Neisseria_mucosa            | Stroke              | Simple mode               | 12 | 0.9868 | 0.9521 | 1.0228 | 0.4828 | -0.0049 | 0.0114 | 0.6740 | 9.0284  | 0.5294 | -312.0880 |
| log_s_Neisseria_mucosa            | Stroke              | Weighted mode             | 12 | 0.9889 | 0.9569 | 1.0219 | 0.5184 | -0.0049 | 0.0114 | 0.6740 | 9.0284  | 0.5294 | -312.0880 |
| log_s_Neisseria_subflava          | CardioEmbolicStroke | MR Egger                  | 12 | 0.7986 | 0.5410 | 1.1788 | 0.2841 | 0.1058  | 0.0904 | 0.2691 | 21.0093 | 0.0333 | -32.6691  |
| log_s_Neisseria_subflava          | CardioEmbolicStroke | Weighted median           | 12 | 0.9561 | 0.8597 | 1.0634 | 0.4080 | 0.1058  | 0.0904 | 0.2691 | 21.0093 | 0.0333 | -32.6691  |
| log_s_Neisseria_subflava          | CardioEmbolicStroke | Inverse variance weighted | 12 | 0.9997 | 0.9030 | 1.1068 | 0.9960 | 0.1058  | 0.0904 | 0.2691 | 21.0093 | 0.0333 | -32.6691  |
| log_s_Neisseria_subflava          | CardioEmbolicStroke | Simple mode               | 12 | 0.9804 | 0.8298 | 1.1583 | 0.8201 | 0.1058  | 0.0904 | 0.2691 | 21.0093 | 0.0333 | -32.6691  |
| log_s_Neisseria_subflava          | CardioEmbolicStroke | Weighted mode             | 12 | 0.9628 | 0.8179 | 1.1334 | 0.6576 | 0.1058  | 0.0904 | 0.2691 | 21.0093 | 0.0333 | -32.6691  |
| log_s_Neisseria_subflava          | IschemicStroke      | MR Egger                  | 12 | 1.0136 | 0.9465 | 1.0855 | 0.7067 | -0.0050 | 0.0158 | 0.7584 | 8.0635  | 0.6226 | -569.4210 |
| log_s_Neisseria_subflava          | IschemicStroke      | Weighted median           | 12 | 0.9959 | 0.9737 | 1.0186 | 0.7208 | -0.0050 | 0.0158 | 0.7584 | 8.0635  | 0.6226 | -569.4210 |
| log_s_Neisseria_subflava          | IschemicStroke      | Inverse variance weighted | 12 | 1.0028 | 0.9857 | 1.0203 | 0.7469 | -0.0050 | 0.0158 | 0.7584 | 8.0635  | 0.6226 | -569.4210 |
| log_s_Neisseria_subflava          | IschemicStroke      | Simple mode               | 12 | 0.9904 | 0.9572 | 1.0247 | 0.5895 | -0.0050 | 0.0158 | 0.7584 | 8.0635  | 0.6226 | -569.4210 |
| log_s_Neisseria_subflava          | IschemicStroke      | Weighted mode             | 12 | 0.9940 | 0.9618 | 1.0273 | 0.7261 | -0.0050 | 0.0158 | 0.7584 | 8.0635  | 0.6226 | -569.4210 |
| log_s_Neisseria_subflava          | LargeArteryStroke   | MR Egger                  | 12 | 0.8943 | 0.7165 | 1.1162 | 0.3465 | 0.0744  | 0.0510 | 0.1756 | 7.5830  | 0.7501 | -114.2626 |
| log_s_Neisseria_subflava          | LargeArteryStroke   | Weighted median           | 12 | 1.0240 | 0.9492 | 1.1047 | 0.5392 | 0.0744  | 0.0510 | 0.1756 | 7.5830  | 0.7501 | -114.2626 |
| log_s_Neisseria_subflava          | LargeArteryStroke   | Inverse variance weighted | 12 | 1.0490 | 0.9920 | 1.1093 | 0.0936 | 0.0744  | 0.0510 | 0.1756 | 7.5830  | 0.7501 | -114.2626 |
| log_s_Neisseria_subflava          | LargeArteryStroke   | Simple mode               | 12 | 1.0120 | 0.9032 | 1.1340 | 0.8408 | 0.0744  | 0.0510 | 0.1756 | 7.5830  | 0.7501 | -114.2626 |
| log_s_Neisseria_subflava          | LargeArteryStroke   | Weighted mode             | 12 | 1.0130 | 0.9075 | 1.1306 | 0.8227 | 0.0744  | 0.0510 | 0.1756 | 7.5830  | 0.7501 | -114.2626 |
| log_s_Neisseria_subflava          | SmallVesselStroke   | MR Egger                  | 12 | 1.0795 | 0.9546 | 1.2208 | 0.2505 | -0.0406 | 0.0283 | 0.1826 | 9.4173  | 0.5834 | -239.3739 |
| log_s_Neisseria_subflava          | SmallVesselStroke   | Weighted median           | 12 | 0.9895 | 0.9475 | 1.0334 | 0.6328 | -0.0406 | 0.0283 | 0.1826 | 9.4173  | 0.5834 | -239.3739 |
| log_s_Neisseria_subflava          | SmallVesselStroke   | Inverse variance weighted | 12 | 0.9897 | 0.9594 | 1.0208 | 0.5110 | -0.0406 | 0.0283 | 0.1826 | 9.4173  | 0.5834 | -239.3739 |
| log_s_Neisseria_subflava          | SmallVesselStroke   | Simple mode               | 12 | 0.9788 | 0.9084 | 1.0547 | 0.5857 | -0.0406 | 0.0283 | 0.1826 | 9.4173  | 0.5834 | -239.3739 |
| log_s_Neisseria_subflava          | SmallVesselStroke   | Weighted mode             | 12 | 0.9852 | 0.9221 | 1.0527 | 0.6682 | -0.0406 | 0.0283 | 0.1826 | 9.4173  | 0.5834 | -239.3739 |
| log_s_Neisseria_subflava          | Stroke              | MR Egger                  | 12 | 1.0477 | 0.9868 | 1.1123 | 0.1581 | -0.0173 | 0.0137 | 0.2338 | 11.6029 | 0.3942 | -496.7987 |
| log_s_Neisseria_subflava          | Stroke              | Weighted median           | 12 | 1.0032 | 0.9821 | 1.0247 | 0.7711 | -0.0173 | 0.0137 | 0.2338 | 11.6029 | 0.3942 | -496.7987 |
| log_s_Neisseria_subflava          | Stroke              | Inverse variance weighted | 12 | 1.0092 | 0.9938 | 1.0248 | 0.2453 | -0.0173 | 0.0137 | 0.2338 | 11.6029 | 0.3942 | -496.7987 |
| log_s_Neisseria_subflava          | Stroke              | Simple mode               | 12 | 1.0028 | 0.9684 | 1.0383 | 0.8790 | -0.0173 | 0.0137 | 0.2338 | 11.6029 | 0.3942 | -496.7987 |
| log_s_Neisseria_subflava          | Stroke              | Weighted mode             | 12 | 1.0028 | 0.9714 | 1.0351 | 0.8675 | -0.0173 | 0.0137 | 0.2338 | 11.6029 | 0.3942 | -496.7987 |
| log_s_Oscillibacter_valericigenes | CardioEmbolicStroke | MR Egger                  | 9  | 0.7061 | 0.4132 | 1.2067 | 0.2438 | 0.1619  | 0.1158 | 0.2049 | 9.1007  | 0.3339 | -225.6962 |
| log_s_Oscillibacter_valericigenes | CardioEmbolicStroke | Weighted median           | 9  | 1.0586 | 0.9327 | 1.2014 | 0.3782 | 0.1619  | 0.1158 | 0.2049 | 9.1007  | 0.3339 | -225.6962 |
| log_s_Oscillibacter_valericigenes | CardioEmbolicStroke | Inverse variance weighted | 9  | 1.0288 | 0.9331 | 1.1344 | 0.5684 | 0.1619  | 0.1158 | 0.2049 | 9.1007  | 0.3339 | -225.6962 |
| log_s_Oscillibacter_valericigenes | CardioEmbolicStroke | Simple mode               | 9  | 1.0970 | 0.9070 | 1.3268 | 0.3679 | 0.1619  | 0.1158 | 0.2049 | 9.1007  | 0.3339 | -225.6962 |
| log_s_Oscillibacter_valericigenes | CardioEmbolicStroke | Weighted mode             | 9  | 1.0810 | 0.9094 | 1.2850 | 0.4028 | 0.1619  | 0.1158 | 0.2049 | 9.1007  | 0.3339 | -225.6962 |
| log_s_Oscillibacter_valericigenes | IschemicStroke      | MR Egger                  | 11 | 0.9792 | 0.8822 | 1.0869 | 0.7027 | 0.0075  | 0.0237 | 0.7574 | 18.2004 | 0.0329 | -76.7277  |
| log_s_Oscillibacter_valericigenes | IschemicStroke      | Weighted median           | 11 | 0.9983 | 0.9680 | 1.0296 | 0.9136 | 0.0075  | 0.0237 | 0.7574 | 18.2004 | 0.0329 | -76.7277  |
| log_s_Oscillibacter_valericigenes | IschemicStroke      | Inverse variance weighted | 11 | 0.9953 | 0.9688 | 1.0227 | 0.7356 | 0.0075  | 0.0237 | 0.7574 | 18.2004 | 0.0329 | -76.7277  |
| log_s_Oscillibacter_valericigenes | IschemicStroke      | Simple mode               | 11 | 0.9653 | 0.9124 | 1.0212 | 0.2468 | 0.0075  | 0.0237 | 0.7574 | 18.2004 | 0.0329 | -76.7277  |
| log_s_Oscillibacter_valericigenes | IschemicStroke      | Weighted mode             | 11 | 1.0151 | 0.9598 | 1.0735 | 0.6118 | 0.0075  | 0.0237 | 0.7574 | 18.2004 | 0.0329 | -76.7277  |

|                                   |                     |                           |    |        |        |           |        |         |        |        |         |        |           |
|-----------------------------------|---------------------|---------------------------|----|--------|--------|-----------|--------|---------|--------|--------|---------|--------|-----------|
| log_s_Oscillibacter_valericigenes | LargeArteryStroke   | MR Egger                  | 10 | 0.8756 | 0.6171 | 1.2423    | 0.4779 | 0.0582  | 0.0770 | 0.4711 | 9.4914  | 0.3026 | -101.0780 |
| log_s_Oscillibacter_valericigenes | LargeArteryStroke   | Weighted median           | 10 | 1.0124 | 0.9179 | 1.1165    | 0.8055 | 0.0582  | 0.0770 | 0.4711 | 9.4914  | 0.3026 | -101.0780 |
| log_s_Oscillibacter_valericigenes | LargeArteryStroke   | Inverse variance weighted | 10 | 0.9992 | 0.9304 | 1.0730    | 0.9816 | 0.0582  | 0.0770 | 0.4711 | 9.4914  | 0.3026 | -101.0780 |
| log_s_Oscillibacter_valericigenes | LargeArteryStroke   | Simple mode               | 10 | 1.0616 | 0.9040 | 1.2467    | 0.4844 | 0.0582  | 0.0770 | 0.4711 | 9.4914  | 0.3026 | -101.0780 |
| log_s_Oscillibacter_valericigenes | LargeArteryStroke   | Weighted mode             | 10 | 1.0825 | 0.9291 | 1.2613    | 0.3358 | 0.0582  | 0.0770 | 0.4711 | 9.4914  | 0.3026 | -101.0780 |
| log_s_Oscillibacter_valericigenes | SmallVesselStroke   | MR Egger                  | 10 | 1.0167 | 0.8320 | 1.2424    | 0.8755 | 0.0004  | 0.0441 | 0.9931 | 10.0776 | 0.2596 | -128.6445 |
| log_s_Oscillibacter_valericigenes | SmallVesselStroke   | Weighted median           | 10 | 1.0222 | 0.9720 | 1.0750    | 0.3928 | 0.0004  | 0.0441 | 0.9931 | 10.0776 | 0.2596 | -128.6445 |
| log_s_Oscillibacter_valericigenes | SmallVesselStroke   | Inverse variance weighted | 10 | 1.0176 | 0.9783 | 1.0584    | 0.3849 | 0.0004  | 0.0441 | 0.9931 | 10.0776 | 0.2596 | -128.6445 |
| log_s_Oscillibacter_valericigenes | SmallVesselStroke   | Simple mode               | 10 | 1.0310 | 0.9553 | 1.1127    | 0.4525 | 0.0004  | 0.0441 | 0.9931 | 10.0776 | 0.2596 | -128.6445 |
| log_s_Oscillibacter_valericigenes | SmallVesselStroke   | Weighted mode             | 10 | 1.0301 | 0.9581 | 1.1076    | 0.4429 | 0.0004  | 0.0441 | 0.9931 | 10.0776 | 0.2596 | -128.6445 |
| log_s_Oscillibacter_valericigenes | Stroke              | MR Egger                  | 13 | 1.0267 | 0.9646 | 1.0927    | 0.4256 | -0.0135 | 0.0140 | 0.3550 | 12.3895 | 0.3351 | -121.3433 |
| log_s_Oscillibacter_valericigenes | Stroke              | Weighted median           | 13 | 1.0013 | 0.9781 | 1.0251    | 0.9123 | -0.0135 | 0.0140 | 0.3550 | 12.3895 | 0.3351 | -121.3433 |
| log_s_Oscillibacter_valericigenes | Stroke              | Inverse variance weighted | 13 | 0.9968 | 0.9797 | 1.0143    | 0.7197 | -0.0135 | 0.0140 | 0.3550 | 12.3895 | 0.3351 | -121.3433 |
| log_s_Oscillibacter_valericigenes | Stroke              | Simple mode               | 13 | 1.0021 | 0.9612 | 1.0448    | 0.9233 | -0.0135 | 0.0140 | 0.3550 | 12.3895 | 0.3351 | -121.3433 |
| log_s_Oscillibacter_valericigenes | Stroke              | Weighted mode             | 13 | 0.9993 | 0.9604 | 1.0398    | 0.9739 | -0.0135 | 0.0140 | 0.3550 | 12.3895 | 0.3351 | -121.3433 |
| log_s_Pantoea_ananatis            | CardioEmbolicStroke | MR Egger                  | 3  | 0.0253 | 0.0000 | 451.8377  | 0.5961 | 1.1961  | 1.6715 | 0.6046 | 0.5204  | 0.7709 | 154.0594  |
| log_s_Pantoea_ananatis            | CardioEmbolicStroke | Weighted median           | 3  | 0.9367 | 0.7629 | 1.1501    | 0.5322 | 1.1961  | 1.6715 | 0.6046 | 0.5204  | 0.7709 | 154.0594  |
| log_s_Pantoea_ananatis            | CardioEmbolicStroke | Inverse variance weighted | 3  | 0.9031 | 0.7650 | 1.0662    | 0.2288 | 1.1961  | 1.6715 | 0.6046 | 0.5204  | 0.7709 | 154.0594  |
| log_s_Pantoea_ananatis            | CardioEmbolicStroke | Simple mode               | 3  | 0.9450 | 0.7473 | 1.1950    | 0.6831 | 1.1961  | 1.6715 | 0.6046 | 0.5204  | 0.7709 | 154.0594  |
| log_s_Pantoea_ananatis            | CardioEmbolicStroke | Weighted mode             | 3  | 0.9450 | 0.7388 | 1.2087    | 0.6964 | 1.1961  | 1.6715 | 0.6046 | 0.5204  | 0.7709 | 154.0594  |
| log_s_Pantoea_ananatis            | IschemicStroke      | MR Egger                  | 3  | 2.6856 | 0.2762 | 26.1169   | 0.5511 | -0.3223 | 0.3884 | 0.5591 | 1.0204  | 0.3124 | 639.6794  |
| log_s_Pantoea_ananatis            | IschemicStroke      | Weighted median           | 3  | 1.0398 | 0.9881 | 1.0941    | 0.1339 | -0.3223 | 0.3884 | 0.5591 | 1.0204  | 0.3124 | 639.6794  |
| log_s_Pantoea_ananatis            | IschemicStroke      | Inverse variance weighted | 3  | 1.0255 | 0.9870 | 1.0654    | 0.1966 | -0.3223 | 0.3884 | 0.5591 | 1.0204  | 0.3124 | 639.6794  |
| log_s_Pantoea_ananatis            | IschemicStroke      | Simple mode               | 3  | 1.0439 | 0.9821 | 1.1095    | 0.3014 | -0.3223 | 0.3884 | 0.5591 | 1.0204  | 0.3124 | 639.6794  |
| log_s_Pantoea_ananatis            | IschemicStroke      | Weighted mode             | 3  | 1.0437 | 0.9831 | 1.1081    | 0.2962 | -0.3223 | 0.3884 | 0.5591 | 1.0204  | 0.3124 | 639.6794  |
| log_s_Pantoea_ananatis            | LargeArteryStroke   | MR Egger                  | 3  | 0.9443 | 0.0001 | 7985.3168 | 0.9921 | 0.0559  | 1.5442 | 0.9769 | 1.5281  | 0.2164 | 129.3987  |
| log_s_Pantoea_ananatis            | LargeArteryStroke   | Weighted median           | 3  | 1.1279 | 0.8286 | 1.5354    | 0.4442 | 0.0559  | 1.5442 | 0.9769 | 1.5281  | 0.2164 | 129.3987  |
| log_s_Pantoea_ananatis            | LargeArteryStroke   | Inverse variance weighted | 3  | 1.1161 | 0.9860 | 1.2634    | 0.0825 | 0.0559  | 1.5442 | 0.9769 | 1.5281  | 0.2164 | 129.3987  |
| log_s_Pantoea_ananatis            | LargeArteryStroke   | Simple mode               | 3  | 1.1611 | 0.9494 | 1.4201    | 0.2831 | 0.0559  | 1.5442 | 0.9769 | 1.5281  | 0.2164 | 129.3987  |
| log_s_Pantoea_ananatis            | LargeArteryStroke   | Weighted mode             | 3  | 1.1556 | 0.9378 | 1.4239    | 0.3076 | 0.0559  | 1.5442 | 0.9769 | 1.5281  | 0.2164 | 129.3987  |
| log_s_Pantoea_ananatis            | SmallVesselStroke   | MR Egger                  | 3  | 0.3485 | 0.0059 | 20.4980   | 0.7012 | 0.3624  | 0.6957 | 0.6943 | 0.1373  | 0.7110 | 630.7767  |
| log_s_Pantoea_ananatis            | SmallVesselStroke   | Weighted median           | 3  | 1.0314 | 0.9453 | 1.1253    | 0.4870 | 0.3624  | 0.6957 | 0.6943 | 0.1373  | 0.7110 | 630.7767  |
| log_s_Pantoea_ananatis            | SmallVesselStroke   | Inverse variance weighted | 3  | 1.0288 | 0.9602 | 1.1023    | 0.4196 | 0.3624  | 0.6957 | 0.6943 | 0.1373  | 0.7110 | 630.7767  |
| log_s_Pantoea_ananatis            | SmallVesselStroke   | Simple mode               | 3  | 1.0395 | 0.9387 | 1.1510    | 0.5344 | 0.3624  | 0.6957 | 0.6943 | 0.1373  | 0.7110 | 630.7767  |
| log_s_Pantoea_ananatis            | SmallVesselStroke   | Weighted mode             | 3  | 1.0380 | 0.9457 | 1.1394    | 0.5143 | 0.3624  | 0.6957 | 0.6943 | 0.1373  | 0.7110 | 630.7767  |
| log_s_Pantoea_ananatis            | Stroke              | MR Egger                  | 4  | 0.7379 | 0.4383 | 1.2421    | 0.3711 | 0.1121  | 0.0906 | 0.3413 | 2.3026  | 0.5120 | 1457.1818 |
| log_s_Pantoea_ananatis            | Stroke              | Weighted median           | 4  | 1.0266 | 0.9870 | 1.0679    | 0.1911 | 0.1121  | 0.0906 | 0.3413 | 2.3026  | 0.5120 | 1457.1818 |
| log_s_Pantoea_ananatis            | Stroke              | Inverse variance weighted | 4  | 1.0247 | 0.9936 | 1.0568    | 0.1207 | 0.1121  | 0.0906 | 0.3413 | 2.3026  | 0.5120 | 1457.1818 |
| log_s_Pantoea_ananatis            | Stroke              | Simple mode               | 4  | 1.0284 | 0.9818 | 1.0771    | 0.3216 | 0.1121  | 0.0906 | 0.3413 | 2.3026  | 0.5120 | 1457.1818 |
| log_s_Pantoea_ananatis            | Stroke              | Weighted mode             | 4  | 1.0284 | 0.9836 | 1.0752    | 0.3059 | 0.1121  | 0.0906 | 0.3413 | 2.3026  | 0.5120 | 1457.1818 |
| log_s_Peptoniphilus_duerdenii     | CardioEmbolicStroke | MR Egger                  | 7  | 0.8638 | 0.5629 | 1.3256    | 0.5327 | 0.0666  | 0.0938 | 0.5092 | 1.7810  | 0.8785 | -608.3589 |
| log_s_Peptoniphilus_duerdenii     | CardioEmbolicStroke | Weighted median           | 7  | 0.9741 | 0.8490 | 1.1177    | 0.7088 | 0.0666  | 0.0938 | 0.5092 | 1.7810  | 0.8785 | -608.3589 |
| log_s_Peptoniphilus_duerdenii     | CardioEmbolicStroke | Inverse variance weighted | 7  | 1.0037 | 0.8995 | 1.1200    | 0.9474 | 0.0666  | 0.0938 | 0.5092 | 1.7810  | 0.8785 | -608.3589 |
| log_s_Peptoniphilus_duerdenii     | CardioEmbolicStroke | Simple mode               | 7  | 0.9643 | 0.7887 | 1.1789    | 0.7350 | 0.0666  | 0.0938 | 0.5092 | 1.7810  | 0.8785 | -608.3589 |
| log_s_Peptoniphilus_duerdenii     | CardioEmbolicStroke | Weighted mode             | 7  | 0.9665 | 0.7896 | 1.1829    | 0.7521 | 0.0666  | 0.0938 | 0.5092 | 1.7810  | 0.8785 | -608.3589 |
| log_s_Peptoniphilus_duerdenii     | IschemicStroke      | MR Egger                  | 10 | 0.9328 | 0.8841 | 0.9843    | 0.0348 | 0.0167  | 0.0136 | 0.2558 | 8.6550  | 0.4697 | -78.1122  |
| log_s_Peptoniphilus_duerdenii     | IschemicStroke      | Weighted median           | 10 | 0.9598 | 0.9324 | 0.9880    | 0.0054 | 0.0167  | 0.0136 | 0.2558 | 8.6550  | 0.4697 | -78.1122  |
| log_s_Peptoniphilus_duerdenii     | IschemicStroke      | Inverse variance weighted | 10 | 0.9621 | 0.9423 | 0.9824    | 0.0003 | 0.0167  | 0.0136 | 0.2558 | 8.6550  | 0.4697 | -78.1122  |
| log_s_Peptoniphilus_duerdenii     | IschemicStroke      | Simple mode               | 10 | 0.9450 | 0.8966 | 0.9960    | 0.0642 | 0.0167  | 0.0136 | 0.2558 | 8.6550  | 0.4697 | -78.1122  |
| log_s_Peptoniphilus_duerdenii     | IschemicStroke      | Weighted mode             | 10 | 0.9470 | 0.8987 | 0.9979    | 0.0721 | 0.0167  | 0.0136 | 0.2558 | 8.6550  | 0.4697 | -78.1122  |
| log_s_Peptoniphilus_duerdenii     | LargeArteryStroke   | MR Egger                  | 9  | 0.9731 | 0.8115 | 1.1669    | 0.7771 | -0.0202 | 0.0450 | 0.6669 | 6.1136  | 0.5265 | -54.1897  |
| log_s_Peptoniphilus_duerdenii     | LargeArteryStroke   | Weighted median           | 9  | 0.9438 | 0.8594 | 1.0365    | 0.2264 | -0.0202 | 0.0450 | 0.6669 | 6.1136  | 0.5265 | -54.1897  |
| log_s_Peptoniphilus_duerdenii     | LargeArteryStroke   | Inverse variance weighted | 9  | 0.9365 | 0.8725 | 1.0052    | 0.0694 | -0.0202 | 0.0450 | 0.6669 | 6.1136  | 0.5265 | -54.1897  |

|                                  |                     |                           |    |        |        |        |        |         |        |        |         |        |            |
|----------------------------------|---------------------|---------------------------|----|--------|--------|--------|--------|---------|--------|--------|---------|--------|------------|
| log_s_Peptoniphilus_duerdenii    | LargeArteryStroke   | Simple mode               | 9  | 0.9379 | 0.8270 | 1.0637 | 0.3471 | -0.0202 | 0.0450 | 0.6669 | 6.1136  | 0.5265 | -54.1897   |
| log_s_Peptoniphilus_duerdenii    | LargeArteryStroke   | Weighted mode             | 9  | 0.9407 | 0.8312 | 1.0647 | 0.3618 | -0.0202 | 0.0450 | 0.6669 | 6.1136  | 0.5265 | -54.1897   |
| log_s_Peptoniphilus_duerdenii    | SmallVesselStroke   | MR Egger                  | 9  | 0.9236 | 0.8313 | 1.0262 | 0.1827 | 0.0200  | 0.0262 | 0.4692 | 7.7195  | 0.3580 | -49.5588   |
| log_s_Peptoniphilus_duerdenii    | SmallVesselStroke   | Weighted median           | 9  | 0.9745 | 0.9241 | 1.0276 | 0.3401 | 0.0200  | 0.0262 | 0.4692 | 7.7195  | 0.3580 | -49.5588   |
| log_s_Peptoniphilus_duerdenii    | SmallVesselStroke   | Inverse variance weighted | 9  | 0.9592 | 0.9215 | 0.9985 | 0.0421 | 0.0200  | 0.0262 | 0.4692 | 7.7195  | 0.3580 | -49.5588   |
| log_s_Peptoniphilus_duerdenii    | SmallVesselStroke   | Simple mode               | 9  | 0.9825 | 0.8956 | 1.0779 | 0.7190 | 0.0200  | 0.0262 | 0.4692 | 7.7195  | 0.3580 | -49.5588   |
| log_s_Peptoniphilus_duerdenii    | SmallVesselStroke   | Weighted mode             | 9  | 0.9818 | 0.8981 | 1.0734 | 0.6975 | 0.0200  | 0.0262 | 0.4692 | 7.7195  | 0.3580 | -49.5588   |
| log_s_Peptoniphilus_duerdenii    | Stroke              | MR Egger                  | 10 | 0.9828 | 0.9305 | 1.0379 | 0.5498 | 0.0036  | 0.0134 | 0.7956 | 4.9818  | 0.7595 | -172.7982  |
| log_s_Peptoniphilus_duerdenii    | Stroke              | Weighted median           | 10 | 0.9901 | 0.9666 | 1.0141 | 0.4153 | 0.0036  | 0.0134 | 0.7956 | 4.9818  | 0.7595 | -172.7982  |
| log_s_Peptoniphilus_duerdenii    | Stroke              | Inverse variance weighted | 10 | 0.9897 | 0.9717 | 1.0080 | 0.2688 | 0.0036  | 0.0134 | 0.7956 | 4.9818  | 0.7595 | -172.7982  |
| log_s_Peptoniphilus_duerdenii    | Stroke              | Simple mode               | 10 | 0.9806 | 0.9463 | 1.0161 | 0.3084 | 0.0036  | 0.0134 | 0.7956 | 4.9818  | 0.7595 | -172.7982  |
| log_s_Peptoniphilus_duerdenii    | Stroke              | Weighted mode             | 10 | 0.9936 | 0.9577 | 1.0309 | 0.7420 | 0.0036  | 0.0134 | 0.7956 | 4.9818  | 0.7595 | -172.7982  |
| log_s_Peptoniphilus_harei        | CardioEmbolicStroke | MR Egger                  | 4  | 1.4227 | 0.2201 | 9.1942 | 0.7467 | -0.2017 | 0.4145 | 0.6746 | 7.4590  | 0.0240 | 1877.8108  |
| log_s_Peptoniphilus_harei        | CardioEmbolicStroke | Weighted median           | 4  | 0.9741 | 0.7966 | 1.1910 | 0.7978 | -0.2017 | 0.4145 | 0.6746 | 7.4590  | 0.0240 | 1877.8108  |
| log_s_Peptoniphilus_harei        | CardioEmbolicStroke | Inverse variance weighted | 4  | 0.9002 | 0.7011 | 1.1560 | 0.4100 | -0.2017 | 0.4145 | 0.6746 | 7.4590  | 0.0240 | 1877.8108  |
| log_s_Peptoniphilus_harei        | CardioEmbolicStroke | Simple mode               | 4  | 1.0727 | 0.7835 | 1.4688 | 0.6910 | -0.2017 | 0.4145 | 0.6746 | 7.4590  | 0.0240 | 1877.8108  |
| log_s_Peptoniphilus_harei        | CardioEmbolicStroke | Weighted mode             | 4  | 1.0532 | 0.8036 | 1.3803 | 0.7324 | -0.2017 | 0.4145 | 0.6746 | 7.4590  | 0.0240 | 1877.8108  |
| log_s_Peptoniphilus_harei        | IschemicStroke      | MR Egger                  | 6  | 0.8994 | 0.7896 | 1.0245 | 0.1859 | 0.0500  | 0.0300 | 0.1708 | 5.9210  | 0.3140 | -1873.1581 |
| log_s_Peptoniphilus_harei        | IschemicStroke      | Weighted median           | 6  | 1.0039 | 0.9673 | 1.0418 | 0.8384 | 0.0500  | 0.0300 | 0.1708 | 5.9210  | 0.3140 | -1873.1581 |
| log_s_Peptoniphilus_harei        | IschemicStroke      | Inverse variance weighted | 6  | 1.0021 | 0.9714 | 1.0338 | 0.8941 | 0.0500  | 0.0300 | 0.1708 | 5.9210  | 0.3140 | -1873.1581 |
| log_s_Peptoniphilus_harei        | IschemicStroke      | Simple mode               | 6  | 1.0021 | 0.9497 | 1.0574 | 0.9414 | 0.0500  | 0.0300 | 0.1708 | 5.9210  | 0.3140 | -1873.1581 |
| log_s_Peptoniphilus_harei        | IschemicStroke      | Weighted mode             | 6  | 1.0031 | 0.9556 | 1.0529 | 0.9067 | 0.0500  | 0.0300 | 0.1708 | 5.9210  | 0.3140 | -1873.1581 |
| log_s_Peptoniphilus_harei        | LargeArteryStroke   | MR Egger                  | 5  | 0.8084 | 0.5248 | 1.2454 | 0.4059 | 0.0815  | 0.1026 | 0.4848 | 1.5372  | 0.8200 | -1014.5297 |
| log_s_Peptoniphilus_harei        | LargeArteryStroke   | Weighted median           | 5  | 0.9820 | 0.8726 | 1.1051 | 0.7630 | 0.0815  | 0.1026 | 0.4848 | 1.5372  | 0.8200 | -1014.5297 |
| log_s_Peptoniphilus_harei        | LargeArteryStroke   | Inverse variance weighted | 5  | 0.9587 | 0.8675 | 1.0595 | 0.4080 | 0.0815  | 0.1026 | 0.4848 | 1.5372  | 0.8200 | -1014.5297 |
| log_s_Peptoniphilus_harei        | LargeArteryStroke   | Simple mode               | 5  | 0.9901 | 0.8367 | 1.1716 | 0.9132 | 0.0815  | 0.1026 | 0.4848 | 1.5372  | 0.8200 | -1014.5297 |
| log_s_Peptoniphilus_harei        | LargeArteryStroke   | Weighted mode             | 5  | 0.9936 | 0.8448 | 1.1687 | 0.9421 | 0.0815  | 0.1026 | 0.4848 | 1.5372  | 0.8200 | -1014.5297 |
| log_s_Peptoniphilus_harei        | SmallVesselStroke   | MR Egger                  | 5  | 1.0063 | 0.7894 | 1.2828 | 0.9627 | -0.0058 | 0.0575 | 0.9257 | 0.9085  | 0.8234 | -3904.5933 |
| log_s_Peptoniphilus_harei        | SmallVesselStroke   | Weighted median           | 5  | 0.9789 | 0.9144 | 1.0479 | 0.5394 | -0.0058 | 0.0575 | 0.9257 | 0.9085  | 0.8234 | -3904.5933 |
| log_s_Peptoniphilus_harei        | SmallVesselStroke   | Inverse variance weighted | 5  | 0.9941 | 0.9402 | 1.0510 | 0.8348 | -0.0058 | 0.0575 | 0.9257 | 0.9085  | 0.8234 | -3904.5933 |
| log_s_Peptoniphilus_harei        | SmallVesselStroke   | Simple mode               | 5  | 0.9760 | 0.8968 | 1.0622 | 0.6036 | -0.0058 | 0.0575 | 0.9257 | 0.9085  | 0.8234 | -3904.5933 |
| log_s_Peptoniphilus_harei        | SmallVesselStroke   | Weighted mode             | 5  | 0.9765 | 0.8946 | 1.0659 | 0.6228 | -0.0058 | 0.0575 | 0.9257 | 0.9085  | 0.8234 | -3904.5933 |
| log_s_Peptoniphilus_harei        | Stroke              | MR Egger                  | 6  | 0.9341 | 0.8079 | 1.0799 | 0.4091 | 0.0366  | 0.0335 | 0.3364 | 9.1563  | 0.1030 | -1936.7155 |
| log_s_Peptoniphilus_harei        | Stroke              | Weighted median           | 6  | 1.0218 | 0.9889 | 1.0558 | 0.1968 | 0.0366  | 0.0335 | 0.3364 | 9.1563  | 0.1030 | -1936.7155 |
| log_s_Peptoniphilus_harei        | Stroke              | Inverse variance weighted | 6  | 1.0107 | 0.9784 | 1.0441 | 0.5209 | 0.0366  | 0.0335 | 0.3364 | 9.1563  | 0.1030 | -1936.7155 |
| log_s_Peptoniphilus_harei        | Stroke              | Simple mode               | 6  | 1.0280 | 0.9817 | 1.0763 | 0.2930 | 0.0366  | 0.0335 | 0.3364 | 9.1563  | 0.1030 | -1936.7155 |
| log_s_Peptoniphilus_harei        | Stroke              | Weighted mode             | 6  | 1.0259 | 0.9877 | 1.0655 | 0.2434 | 0.0366  | 0.0335 | 0.3364 | 9.1563  | 0.1030 | -1936.7155 |
| log_s_Porphyromonas_endodontalis | CardioEmbolicStroke | MR Egger                  | 9  | 1.3187 | 0.7047 | 2.4675 | 0.4155 | -0.1095 | 0.1228 | 0.4023 | 8.6149  | 0.2815 | -484.3654  |
| log_s_Porphyromonas_endodontalis | CardioEmbolicStroke | Weighted median           | 9  | 0.9714 | 0.8487 | 1.1117 | 0.6731 | -0.1095 | 0.1228 | 0.4023 | 8.6149  | 0.2815 | -484.3654  |
| log_s_Porphyromonas_endodontalis | CardioEmbolicStroke | Inverse variance weighted | 9  | 0.9955 | 0.8992 | 1.1022 | 0.9313 | -0.1095 | 0.1228 | 0.4023 | 8.6149  | 0.2815 | -484.3654  |
| log_s_Porphyromonas_endodontalis | CardioEmbolicStroke | Simple mode               | 9  | 0.9432 | 0.7584 | 1.1730 | 0.6134 | -0.1095 | 0.1228 | 0.4023 | 8.6149  | 0.2815 | -484.3654  |
| log_s_Porphyromonas_endodontalis | CardioEmbolicStroke | Weighted mode             | 9  | 0.9490 | 0.7638 | 1.1790 | 0.6489 | -0.1095 | 0.1228 | 0.4023 | 8.6149  | 0.2815 | -484.3654  |
| log_s_Porphyromonas_endodontalis | IschemicStroke      | MR Egger                  | 9  | 0.8000 | 0.6899 | 0.9278 | 0.0214 | 0.0873  | 0.0290 | 0.0198 | 20.7237 | 0.0079 | -2238.3008 |
| log_s_Porphyromonas_endodontalis | IschemicStroke      | Weighted median           | 9  | 1.0029 | 0.9719 | 1.0349 | 0.8559 | 0.0873  | 0.0290 | 0.0198 | 20.7237 | 0.0079 | -2238.3008 |
| log_s_Porphyromonas_endodontalis | IschemicStroke      | Inverse variance weighted | 9  | 1.0011 | 0.9671 | 1.0363 | 0.9500 | 0.0873  | 0.0290 | 0.0198 | 20.7237 | 0.0079 | -2238.3008 |
| log_s_Porphyromonas_endodontalis | IschemicStroke      | Simple mode               | 9  | 1.0015 | 0.9492 | 1.0567 | 0.9569 | 0.0873  | 0.0290 | 0.0198 | 20.7237 | 0.0079 | -2238.3008 |
| log_s_Porphyromonas_endodontalis | IschemicStroke      | Weighted mode             | 9  | 0.9995 | 0.9501 | 1.0516 | 0.9860 | 0.0873  | 0.0290 | 0.0198 | 20.7237 | 0.0079 | -2238.3008 |
| log_s_Porphyromonas_endodontalis | LargeArteryStroke   | MR Egger                  | 9  | 1.0098 | 0.6640 | 1.5356 | 0.9650 | -0.0052 | 0.0822 | 0.9509 | 5.9271  | 0.5483 | -1261.3904 |
| log_s_Porphyromonas_endodontalis | LargeArteryStroke   | Weighted median           | 9  | 1.0036 | 0.9143 | 1.1016 | 0.9401 | -0.0052 | 0.0822 | 0.9509 | 5.9271  | 0.5483 | -1261.3904 |
| log_s_Porphyromonas_endodontalis | LargeArteryStroke   | Inverse variance weighted | 9  | 0.9963 | 0.9296 | 1.0678 | 0.9162 | -0.0052 | 0.0822 | 0.9509 | 5.9271  | 0.5483 | -1261.3904 |
| log_s_Porphyromonas_endodontalis | LargeArteryStroke   | Simple mode               | 9  | 1.0673 | 0.9207 | 1.2372 | 0.4127 | -0.0052 | 0.0822 | 0.9509 | 5.9271  | 0.5483 | -1261.3904 |
| log_s_Porphyromonas_endodontalis | LargeArteryStroke   | Weighted mode             | 9  | 1.0625 | 0.9125 | 1.2370 | 0.4575 | -0.0052 | 0.0822 | 0.9509 | 5.9271  | 0.5483 | -1261.3904 |
| log_s_Porphyromonas_endodontalis | SmallVesselStroke   | MR Egger                  | 9  | 0.8212 | 0.5974 | 1.1287 | 0.2641 | 0.0757  | 0.0623 | 0.2638 | 15.5430 | 0.0494 | -1218.0630 |

|                                  |                     |                           |    |        |        |        |        |         |        |        |         |        |            |
|----------------------------------|---------------------|---------------------------|----|--------|--------|--------|--------|---------|--------|--------|---------|--------|------------|
| log_s_Porphyromonas_endodontalis | SmallVesselStroke   | Weighted median           | 9  | 1.0038 | 0.9497 | 1.0611 | 0.8924 | 0.0757  | 0.0623 | 0.2638 | 15.5430 | 0.0494 | -1218.0630 |
| log_s_Porphyromonas_endodontalis | SmallVesselStroke   | Inverse variance weighted | 9  | 0.9975 | 0.9451 | 1.0528 | 0.9267 | 0.0757  | 0.0623 | 0.2638 | 15.5430 | 0.0494 | -1218.0630 |
| log_s_Porphyromonas_endodontalis | SmallVesselStroke   | Simple mode               | 9  | 0.9993 | 0.9226 | 1.0824 | 0.9869 | 0.0757  | 0.0623 | 0.2638 | 15.5430 | 0.0494 | -1218.0630 |
| log_s_Porphyromonas_endodontalis | SmallVesselStroke   | Weighted mode             | 9  | 0.9993 | 0.9323 | 1.0711 | 0.9850 | 0.0757  | 0.0623 | 0.2638 | 15.5430 | 0.0494 | -1218.0630 |
| log_s_Porphyromonas_endodontalis | Stroke              | MR Egger                  | 9  | 0.8654 | 0.7612 | 0.9838 | 0.0629 | 0.0548  | 0.0251 | 0.0654 | 15.6126 | 0.0483 | -3056.0668 |
| log_s_Porphyromonas_endodontalis | Stroke              | Weighted median           | 9  | 1.0073 | 0.9792 | 1.0363 | 0.6126 | 0.0548  | 0.0251 | 0.0654 | 15.6126 | 0.0483 | -3056.0668 |
| log_s_Porphyromonas_endodontalis | Stroke              | Inverse variance weighted | 9  | 0.9963 | 0.9711 | 1.0222 | 0.7776 | 0.0548  | 0.0251 | 0.0654 | 15.6126 | 0.0483 | -3056.0668 |
| log_s_Porphyromonas_endodontalis | Stroke              | Simple mode               | 9  | 1.0139 | 0.9717 | 1.0579 | 0.5430 | 0.0548  | 0.0251 | 0.0654 | 15.6126 | 0.0483 | -3056.0668 |
| log_s_Porphyromonas_endodontalis | Stroke              | Weighted mode             | 9  | 1.0130 | 0.9710 | 1.0568 | 0.5672 | 0.0548  | 0.0251 | 0.0654 | 15.6126 | 0.0483 | -3056.0668 |
| log_s_Porphyromonas_gingivalis   | CardioEmbolicStroke | MR Egger                  | 3  | 1.1361 | 0.3318 | 3.8897 | 0.8724 | -0.0780 | 0.2786 | 0.8262 | 4.2656  | 0.0389 | 1941.3900  |
| log_s_Porphyromonas_gingivalis   | CardioEmbolicStroke | Weighted median           | 3  | 1.0324 | 0.8292 | 1.2854 | 0.7757 | -0.0780 | 0.2786 | 0.8262 | 4.2656  | 0.0389 | 1941.3900  |
| log_s_Porphyromonas_gingivalis   | CardioEmbolicStroke | Inverse variance weighted | 3  | 0.9605 | 0.7348 | 1.2553 | 0.7677 | -0.0780 | 0.2786 | 0.8262 | 4.2656  | 0.0389 | 1941.3900  |
| log_s_Porphyromonas_gingivalis   | CardioEmbolicStroke | Simple mode               | 3  | 1.0643 | 0.8010 | 1.4142 | 0.7092 | -0.0780 | 0.2786 | 0.8262 | 4.2656  | 0.0389 | 1941.3900  |
| log_s_Porphyromonas_gingivalis   | CardioEmbolicStroke | Weighted mode             | 3  | 1.0592 | 0.8290 | 1.3533 | 0.6906 | -0.0780 | 0.2786 | 0.8262 | 4.2656  | 0.0389 | 1941.3900  |
| log_s_Porphyromonas_gingivalis   | IschemicStroke      | MR Egger                  | 4  | 1.0316 | 0.9557 | 1.1135 | 0.5086 | -0.0113 | 0.0201 | 0.6305 | 1.3766  | 0.5024 | -425.2915  |
| log_s_Porphyromonas_gingivalis   | IschemicStroke      | Weighted median           | 4  | 1.0066 | 0.9652 | 1.0497 | 0.7595 | -0.0113 | 0.0201 | 0.6305 | 1.3766  | 0.5024 | -425.2915  |
| log_s_Porphyromonas_gingivalis   | IschemicStroke      | Inverse variance weighted | 4  | 1.0115 | 0.9778 | 1.0464 | 0.5075 | -0.0113 | 0.0201 | 0.6305 | 1.3766  | 0.5024 | -425.2915  |
| log_s_Porphyromonas_gingivalis   | IschemicStroke      | Simple mode               | 4  | 0.9956 | 0.9380 | 1.0567 | 0.8934 | -0.0113 | 0.0201 | 0.6305 | 1.3766  | 0.5024 | -425.2915  |
| log_s_Porphyromonas_gingivalis   | IschemicStroke      | Weighted mode             | 4  | 0.9950 | 0.9364 | 1.0574 | 0.8824 | -0.0113 | 0.0201 | 0.6305 | 1.3766  | 0.5024 | -425.2915  |
| log_s_Porphyromonas_gingivalis   | LargeArteryStroke   | MR Egger                  | 3  | 1.0174 | 0.6505 | 1.5912 | 0.9521 | 0.0174  | 0.1010 | 0.8913 | 0.2366  | 0.6267 | 7365.6536  |
| log_s_Porphyromonas_gingivalis   | LargeArteryStroke   | Weighted median           | 3  | 1.0414 | 0.8867 | 1.2232 | 0.6207 | 0.0174  | 0.1010 | 0.8913 | 0.2366  | 0.6267 | 7365.6536  |
| log_s_Porphyromonas_gingivalis   | LargeArteryStroke   | Inverse variance weighted | 3  | 1.0563 | 0.9257 | 1.2054 | 0.4160 | 0.0174  | 0.1010 | 0.8913 | 0.2366  | 0.6267 | 7365.6536  |
| log_s_Porphyromonas_gingivalis   | LargeArteryStroke   | Simple mode               | 3  | 1.0371 | 0.8721 | 1.2332 | 0.7202 | 0.0174  | 0.1010 | 0.8913 | 0.2366  | 0.6267 | 7365.6536  |
| log_s_Porphyromonas_gingivalis   | LargeArteryStroke   | Weighted mode             | 3  | 1.0371 | 0.8735 | 1.2313 | 0.7178 | 0.0174  | 0.1010 | 0.8913 | 0.2366  | 0.6267 | 7365.6536  |
| log_s_Porphyromonas_gingivalis   | SmallVesselStroke   | MR Egger                  | 4  | 1.0350 | 0.9028 | 1.1867 | 0.6705 | 0.0115  | 0.0361 | 0.7800 | 0.6858  | 0.7097 | -234.5894  |
| log_s_Porphyromonas_gingivalis   | SmallVesselStroke   | Weighted median           | 4  | 1.0580 | 0.9818 | 1.1402 | 0.1392 | 0.0115  | 0.0361 | 0.7800 | 0.6858  | 0.7097 | -234.5894  |
| log_s_Porphyromonas_gingivalis   | SmallVesselStroke   | Inverse variance weighted | 4  | 1.0558 | 0.9934 | 1.1223 | 0.0808 | 0.0115  | 0.0361 | 0.7800 | 0.6858  | 0.7097 | -234.5894  |
| log_s_Porphyromonas_gingivalis   | SmallVesselStroke   | Simple mode               | 4  | 1.0614 | 0.9593 | 1.1745 | 0.3318 | 0.0115  | 0.0361 | 0.7800 | 0.6858  | 0.7097 | -234.5894  |
| log_s_Porphyromonas_gingivalis   | SmallVesselStroke   | Weighted mode             | 4  | 1.0660 | 0.9693 | 1.1723 | 0.2794 | 0.0115  | 0.0361 | 0.7800 | 0.6858  | 0.7097 | -234.5894  |
| log_s_Porphyromonas_gingivalis   | Stroke              | MR Egger                  | 6  | 1.0090 | 0.9472 | 1.0748 | 0.7953 | -0.0037 | 0.0159 | 0.8257 | 1.5709  | 0.8140 | -642.9330  |
| log_s_Porphyromonas_gingivalis   | Stroke              | Weighted median           | 6  | 1.0044 | 0.9727 | 1.0371 | 0.7900 | -0.0037 | 0.0159 | 0.8257 | 1.5709  | 0.8140 | -642.9330  |
| log_s_Porphyromonas_gingivalis   | Stroke              | Inverse variance weighted | 6  | 1.0020 | 0.9762 | 1.0286 | 0.8786 | -0.0037 | 0.0159 | 0.8257 | 1.5709  | 0.8140 | -642.9330  |
| log_s_Porphyromonas_gingivalis   | Stroke              | Simple mode               | 6  | 1.0063 | 0.9633 | 1.0512 | 0.7890 | -0.0037 | 0.0159 | 0.8257 | 1.5709  | 0.8140 | -642.9330  |
| log_s_Porphyromonas_gingivalis   | Stroke              | Weighted mode             | 6  | 1.0131 | 0.9716 | 1.0565 | 0.5683 | -0.0037 | 0.0159 | 0.8257 | 1.5709  | 0.8140 | -642.9330  |
| log_s_Porphyromonas_uenonis      | CardioEmbolicStroke | MR Egger                  | 12 | 1.0006 | 0.7478 | 1.3388 | 0.9969 | 0.0141  | 0.0668 | 0.8367 | 10.0407 | 0.4369 | -75.5671   |
| log_s_Porphyromonas_uenonis      | CardioEmbolicStroke | Weighted median           | 12 | 1.0118 | 0.9087 | 1.1266 | 0.8304 | 0.0141  | 0.0668 | 0.8367 | 10.0407 | 0.4369 | -75.5671   |
| log_s_Porphyromonas_uenonis      | CardioEmbolicStroke | Inverse variance weighted | 12 | 1.0314 | 0.9555 | 1.1133 | 0.4279 | 0.0141  | 0.0668 | 0.8367 | 10.0407 | 0.4369 | -75.5671   |
| log_s_Porphyromonas_uenonis      | CardioEmbolicStroke | Simple mode               | 12 | 1.0090 | 0.8432 | 1.2075 | 0.9235 | 0.0141  | 0.0668 | 0.8367 | 10.0407 | 0.4369 | -75.5671   |
| log_s_Porphyromonas_uenonis      | CardioEmbolicStroke | Weighted mode             | 12 | 1.0057 | 0.8597 | 1.1763 | 0.9451 | 0.0141  | 0.0668 | 0.8367 | 10.0407 | 0.4369 | -75.5671   |
| log_s_Porphyromonas_uenonis      | IschemicStroke      | MR Egger                  | 13 | 0.9522 | 0.8912 | 1.0174 | 0.1749 | 0.0188  | 0.0153 | 0.2447 | 7.8096  | 0.7998 | -336.0579  |
| log_s_Porphyromonas_uenonis      | IschemicStroke      | Weighted median           | 13 | 0.9887 | 0.9654 | 1.0127 | 0.3532 | 0.0188  | 0.0153 | 0.2447 | 7.8096  | 0.7998 | -336.0579  |
| log_s_Porphyromonas_uenonis      | IschemicStroke      | Inverse variance weighted | 13 | 0.9911 | 0.9740 | 1.0085 | 0.3132 | 0.0188  | 0.0153 | 0.2447 | 7.8096  | 0.7998 | -336.0579  |
| log_s_Porphyromonas_uenonis      | IschemicStroke      | Simple mode               | 13 | 0.9880 | 0.9526 | 1.0247 | 0.5282 | 0.0188  | 0.0153 | 0.2447 | 7.8096  | 0.7998 | -336.0579  |
| log_s_Porphyromonas_uenonis      | IschemicStroke      | Weighted mode             | 13 | 0.9892 | 0.9545 | 1.0251 | 0.5614 | 0.0188  | 0.0153 | 0.2447 | 7.8096  | 0.7998 | -336.0579  |
| log_s_Porphyromonas_uenonis      | LargeArteryStroke   | MR Egger                  | 12 | 0.9932 | 0.7715 | 1.2786 | 0.9588 | 0.0068  | 0.0580 | 0.9086 | 13.5992 | 0.1921 | -97.2057   |
| log_s_Porphyromonas_uenonis      | LargeArteryStroke   | Weighted median           | 12 | 1.0159 | 0.9392 | 1.0987 | 0.6943 | 0.0068  | 0.0580 | 0.9086 | 13.5992 | 0.1921 | -97.2057   |
| log_s_Porphyromonas_uenonis      | LargeArteryStroke   | Inverse variance weighted | 12 | 1.0078 | 0.9457 | 1.0740 | 0.8099 | 0.0068  | 0.0580 | 0.9086 | 13.5992 | 0.1921 | -97.2057   |
| log_s_Porphyromonas_uenonis      | LargeArteryStroke   | Simple mode               | 12 | 1.0264 | 0.9122 | 1.1548 | 0.6738 | 0.0068  | 0.0580 | 0.9086 | 13.5992 | 0.1921 | -97.2057   |
| log_s_Porphyromonas_uenonis      | LargeArteryStroke   | Weighted mode             | 12 | 0.9947 | 0.8913 | 1.1100 | 0.9255 | 0.0068  | 0.0580 | 0.9086 | 13.5992 | 0.1921 | -97.2057   |
| log_s_Porphyromonas_uenonis      | SmallVesselStroke   | MR Egger                  | 12 | 0.8755 | 0.7780 | 0.9852 | 0.0517 | 0.0592  | 0.0272 | 0.0546 | 10.2613 | 0.5071 | -169.0946  |
| log_s_Porphyromonas_uenonis      | SmallVesselStroke   | Weighted median           | 12 | 1.0034 | 0.9611 | 1.0476 | 0.8769 | 0.0592  | 0.0272 | 0.0546 | 10.2613 | 0.5071 | -169.0946  |
| log_s_Porphyromonas_uenonis      | SmallVesselStroke   | Inverse variance weighted | 12 | 0.9933 | 0.9625 | 1.0251 | 0.6769 | 0.0592  | 0.0272 | 0.0546 | 10.2613 | 0.5071 | -169.0946  |
| log_s_Porphyromonas_uenonis      | SmallVesselStroke   | Simple mode               | 12 | 1.0125 | 0.9436 | 1.0864 | 0.7362 | 0.0592  | 0.0272 | 0.0546 | 10.2613 | 0.5071 | -169.0946  |

|                             |                     |                           |    |        |        |        |        |         |        |        |         |        |            |
|-----------------------------|---------------------|---------------------------|----|--------|--------|--------|--------|---------|--------|--------|---------|--------|------------|
| log_s_Porphyromonas_uenonis | SmallVesselStroke   | Weighted mode             | 12 | 1.0049 | 0.9311 | 1.0844 | 0.9030 | 0.0592  | 0.0272 | 0.0546 | 10.2613 | 0.5071 | -169.0946  |
| log_s_Porphyromonas_uenonis | Stroke              | MR Egger                  | 14 | 0.9544 | 0.9019 | 1.0099 | 0.1313 | 0.0176  | 0.0131 | 0.2031 | 8.0122  | 0.8428 | -290.2378  |
| log_s_Porphyromonas_uenonis | Stroke              | Weighted median           | 14 | 0.9880 | 0.9688 | 1.0075 | 0.2247 | 0.0176  | 0.0131 | 0.2031 | 8.0122  | 0.8428 | -290.2378  |
| log_s_Porphyromonas_uenonis | Stroke              | Inverse variance weighted | 14 | 0.9908 | 0.9764 | 1.0055 | 0.2186 | 0.0176  | 0.0131 | 0.2031 | 8.0122  | 0.8428 | -290.2378  |
| log_s_Porphyromonas_uenonis | Stroke              | Simple mode               | 14 | 0.9890 | 0.9576 | 1.0214 | 0.5140 | 0.0176  | 0.0131 | 0.2031 | 8.0122  | 0.8428 | -290.2378  |
| log_s_Porphyromonas_uenonis | Stroke              | Weighted mode             | 14 | 0.9888 | 0.9581 | 1.0204 | 0.4949 | 0.0176  | 0.0131 | 0.2031 | 8.0122  | 0.8428 | -290.2378  |
| log_s_Prevotella_amnii      | CardioEmbolicStroke | MR Egger                  | 5  | 0.8454 | 0.1873 | 3.8163 | 0.8411 | 0.0932  | 0.2953 | 0.7731 | 0.8990  | 0.8257 | 2355.9972  |
| log_s_Prevotella_amnii      | CardioEmbolicStroke | Weighted median           | 5  | 1.0941 | 0.9420 | 1.2708 | 0.2391 | 0.0932  | 0.2953 | 0.7731 | 0.8990  | 0.8257 | 2355.9972  |
| log_s_Prevotella_amnii      | CardioEmbolicStroke | Inverse variance weighted | 5  | 1.0765 | 0.9500 | 1.2200 | 0.2477 | 0.0932  | 0.2953 | 0.7731 | 0.8990  | 0.8257 | 2355.9972  |
| log_s_Prevotella_amnii      | CardioEmbolicStroke | Simple mode               | 5  | 1.1111 | 0.9125 | 1.3529 | 0.3536 | 0.0932  | 0.2953 | 0.7731 | 0.8990  | 0.8257 | 2355.9972  |
| log_s_Prevotella_amnii      | CardioEmbolicStroke | Weighted mode             | 5  | 1.1080 | 0.9112 | 1.3473 | 0.3620 | 0.0932  | 0.2953 | 0.7731 | 0.8990  | 0.8257 | 2355.9972  |
| log_s_Prevotella_amnii      | IschemicStroke      | MR Egger                  | 5  | 0.8398 | 0.5931 | 1.1892 | 0.3979 | 0.0691  | 0.0682 | 0.3853 | 2.2336  | 0.6929 | 11679.1173 |
| log_s_Prevotella_amnii      | IschemicStroke      | Weighted median           | 5  | 1.0154 | 0.9787 | 1.0534 | 0.4158 | 0.0691  | 0.0682 | 0.3853 | 2.2336  | 0.6929 | 11679.1173 |
| log_s_Prevotella_amnii      | IschemicStroke      | Inverse variance weighted | 5  | 1.0048 | 0.9761 | 1.0343 | 0.7474 | 0.0691  | 0.0682 | 0.3853 | 2.2336  | 0.6929 | 11679.1173 |
| log_s_Prevotella_amnii      | IschemicStroke      | Simple mode               | 5  | 1.0177 | 0.9713 | 1.0664 | 0.5011 | 0.0691  | 0.0682 | 0.3853 | 2.2336  | 0.6929 | 11679.1173 |
| log_s_Prevotella_amnii      | IschemicStroke      | Weighted mode             | 5  | 1.0174 | 0.9704 | 1.0667 | 0.5141 | 0.0691  | 0.0682 | 0.3853 | 2.2336  | 0.6929 | 11679.1173 |
| log_s_Prevotella_amnii      | LargeArteryStroke   | MR Egger                  | 5  | 0.4272 | 0.1389 | 1.3140 | 0.2346 | 0.2960  | 0.2201 | 0.2714 | 3.3785  | 0.4966 | 1616.3573  |
| log_s_Prevotella_amnii      | LargeArteryStroke   | Weighted median           | 5  | 0.8915 | 0.7872 | 1.0097 | 0.0705 | 0.2960  | 0.2201 | 0.2714 | 3.3785  | 0.4966 | 1616.3573  |
| log_s_Prevotella_amnii      | LargeArteryStroke   | Inverse variance weighted | 5  | 0.9210 | 0.8387 | 1.0114 | 0.0848 | 0.2960  | 0.2201 | 0.2714 | 3.3785  | 0.4966 | 1616.3573  |
| log_s_Prevotella_amnii      | LargeArteryStroke   | Simple mode               | 5  | 0.8821 | 0.7484 | 1.0398 | 0.2092 | 0.2960  | 0.2201 | 0.2714 | 3.3785  | 0.4966 | 1616.3573  |
| log_s_Prevotella_amnii      | LargeArteryStroke   | Weighted mode             | 5  | 0.8860 | 0.7542 | 1.0409 | 0.2148 | 0.2960  | 0.2201 | 0.2714 | 3.3785  | 0.4966 | 1616.3573  |
| log_s_Prevotella_amnii      | SmallVesselStroke   | MR Egger                  | 5  | 0.8313 | 0.4153 | 1.6639 | 0.6378 | 0.0701  | 0.1360 | 0.6418 | 3.6946  | 0.2964 | 4465.9879  |
| log_s_Prevotella_amnii      | SmallVesselStroke   | Weighted median           | 5  | 0.9880 | 0.9193 | 1.0619 | 0.7432 | 0.0701  | 0.1360 | 0.6418 | 3.6946  | 0.2964 | 4465.9879  |
| log_s_Prevotella_amnii      | SmallVesselStroke   | Inverse variance weighted | 5  | 0.9971 | 0.9464 | 1.0504 | 0.9128 | 0.0701  | 0.1360 | 0.6418 | 3.6946  | 0.2964 | 4465.9879  |
| log_s_Prevotella_amnii      | SmallVesselStroke   | Simple mode               | 5  | 0.9956 | 0.8957 | 1.1067 | 0.9394 | 0.0701  | 0.1360 | 0.6418 | 3.6946  | 0.2964 | 4465.9879  |
| log_s_Prevotella_amnii      | SmallVesselStroke   | Weighted mode             | 5  | 1.0015 | 0.9060 | 1.1071 | 0.9782 | 0.0701  | 0.1360 | 0.6418 | 3.6946  | 0.2964 | 4465.9879  |
| log_s_Prevotella_amnii      | Stroke              | MR Egger                  | 5  | 1.0610 | 0.7873 | 1.4299 | 0.7232 | -0.0202 | 0.0584 | 0.7526 | 0.5485  | 0.9081 | 21949.6358 |
| log_s_Prevotella_amnii      | Stroke              | Weighted median           | 5  | 1.0064 | 0.9758 | 1.0381 | 0.6841 | -0.0202 | 0.0584 | 0.7526 | 0.5485  | 0.9081 | 21949.6358 |
| log_s_Prevotella_amnii      | Stroke              | Inverse variance weighted | 5  | 1.0069 | 0.9821 | 1.0322 | 0.5902 | -0.0202 | 0.0584 | 0.7526 | 0.5485  | 0.9081 | 21949.6358 |
| log_s_Prevotella_amnii      | Stroke              | Simple mode               | 5  | 1.0057 | 0.9663 | 1.0467 | 0.7937 | -0.0202 | 0.0584 | 0.7526 | 0.5485  | 0.9081 | 21949.6358 |
| log_s_Prevotella_amnii      | Stroke              | Weighted mode             | 5  | 1.0062 | 0.9664 | 1.0477 | 0.7779 | -0.0202 | 0.0584 | 0.7526 | 0.5485  | 0.9081 | 21949.6358 |
| log_s_Prevotella_bryantii   | CardioEmbolicStroke | MR Egger                  | 11 | 1.0212 | 0.5314 | 1.9625 | 0.9512 | -0.0382 | 0.1310 | 0.7774 | 14.9491 | 0.0923 | -91.1063   |
| log_s_Prevotella_bryantii   | CardioEmbolicStroke | Weighted median           | 11 | 0.9226 | 0.8134 | 1.0464 | 0.2097 | -0.0382 | 0.1310 | 0.7774 | 14.9491 | 0.0923 | -91.1063   |
| log_s_Prevotella_bryantii   | CardioEmbolicStroke | Inverse variance weighted | 11 | 0.9280 | 0.8350 | 1.0314 | 0.1655 | -0.0382 | 0.1310 | 0.7774 | 14.9491 | 0.0923 | -91.1063   |
| log_s_Prevotella_bryantii   | CardioEmbolicStroke | Simple mode               | 11 | 0.8920 | 0.7066 | 1.1261 | 0.3592 | -0.0382 | 0.1310 | 0.7774 | 14.9491 | 0.0923 | -91.1063   |
| log_s_Prevotella_bryantii   | CardioEmbolicStroke | Weighted mode             | 11 | 0.9023 | 0.7252 | 1.1227 | 0.3783 | -0.0382 | 0.1310 | 0.7774 | 14.9491 | 0.0923 | -91.1063   |
| log_s_Prevotella_bryantii   | IschemicStroke      | MR Egger                  | 11 | 0.9564 | 0.8507 | 1.0751 | 0.4740 | 0.0164  | 0.0235 | 0.5038 | 8.2991  | 0.5043 | -963.2186  |
| log_s_Prevotella_bryantii   | IschemicStroke      | Weighted median           | 11 | 0.9946 | 0.9691 | 1.0209 | 0.6864 | 0.0164  | 0.0235 | 0.5038 | 8.2991  | 0.5043 | -963.2186  |
| log_s_Prevotella_bryantii   | IschemicStroke      | Inverse variance weighted | 11 | 0.9964 | 0.9768 | 1.0164 | 0.7196 | 0.0164  | 0.0235 | 0.5038 | 8.2991  | 0.5043 | -963.2186  |
| log_s_Prevotella_bryantii   | IschemicStroke      | Simple mode               | 11 | 0.9914 | 0.9494 | 1.0352 | 0.7029 | 0.0164  | 0.0235 | 0.5038 | 8.2991  | 0.5043 | -963.2186  |
| log_s_Prevotella_bryantii   | IschemicStroke      | Weighted mode             | 11 | 0.9918 | 0.9519 | 1.0333 | 0.7007 | 0.0164  | 0.0235 | 0.5038 | 8.2991  | 0.5043 | -963.2186  |
| log_s_Prevotella_bryantii   | LargeArteryStroke   | MR Egger                  | 11 | 1.0899 | 0.7474 | 1.5893 | 0.6654 | -0.0303 | 0.0757 | 0.6987 | 8.1824  | 0.5159 | -215.3648  |
| log_s_Prevotella_bryantii   | LargeArteryStroke   | Weighted median           | 11 | 0.9926 | 0.9123 | 1.0801 | 0.8637 | -0.0303 | 0.0757 | 0.6987 | 8.1824  | 0.5159 | -215.3648  |
| log_s_Prevotella_bryantii   | LargeArteryStroke   | Inverse variance weighted | 11 | 1.0103 | 0.9474 | 1.0773 | 0.7547 | -0.0303 | 0.0757 | 0.6987 | 8.1824  | 0.5159 | -215.3648  |
| log_s_Prevotella_bryantii   | LargeArteryStroke   | Simple mode               | 11 | 1.1092 | 0.9572 | 1.2854 | 0.1982 | -0.0303 | 0.0757 | 0.6987 | 8.1824  | 0.5159 | -215.3648  |
| log_s_Prevotella_bryantii   | LargeArteryStroke   | Weighted mode             | 11 | 0.9706 | 0.8373 | 1.1252 | 0.7008 | -0.0303 | 0.0757 | 0.6987 | 8.1824  | 0.5159 | -215.3648  |
| log_s_Prevotella_bryantii   | SmallVesselStroke   | MR Egger                  | 11 | 0.9867 | 0.7997 | 1.2174 | 0.9033 | 0.0124  | 0.0422 | 0.7749 | 5.1867  | 0.8177 | -646.7370  |
| log_s_Prevotella_bryantii   | SmallVesselStroke   | Weighted median           | 11 | 1.0195 | 0.9715 | 1.0699 | 0.4328 | 0.0124  | 0.0422 | 0.7749 | 5.1867  | 0.8177 | -646.7370  |
| log_s_Prevotella_bryantii   | SmallVesselStroke   | Inverse variance weighted | 11 | 1.0179 | 0.9821 | 1.0549 | 0.3310 | 0.0124  | 0.0422 | 0.7749 | 5.1867  | 0.8177 | -646.7370  |
| log_s_Prevotella_bryantii   | SmallVesselStroke   | Simple mode               | 11 | 1.0190 | 0.9502 | 1.0926 | 0.6096 | 0.0124  | 0.0422 | 0.7749 | 5.1867  | 0.8177 | -646.7370  |
| log_s_Prevotella_bryantii   | SmallVesselStroke   | Weighted mode             | 11 | 1.0156 | 0.9480 | 1.0881 | 0.6684 | 0.0124  | 0.0422 | 0.7749 | 5.1867  | 0.8177 | -646.7370  |
| log_s_Prevotella_bryantii   | Stroke              | MR Egger                  | 11 | 0.9725 | 0.8802 | 1.0745 | 0.5971 | 0.0094  | 0.0201 | 0.6516 | 9.6440  | 0.3801 | -1026.0559 |
| log_s_Prevotella_bryantii   | Stroke              | Weighted median           | 11 | 0.9950 | 0.9726 | 1.0179 | 0.6672 | 0.0094  | 0.0201 | 0.6516 | 9.6440  | 0.3801 | -1026.0559 |

|                                 |                     |                           |    |        |        |        |        |         |        |        |         |        |             |
|---------------------------------|---------------------|---------------------------|----|--------|--------|--------|--------|---------|--------|--------|---------|--------|-------------|
| log_s_Prevotella_bryantii       | Stroke              | Inverse variance weighted | 11 | 0.9955 | 0.9789 | 1.0125 | 0.6026 | 0.0094  | 0.0201 | 0.6516 | 9.6440  | 0.3801 | -1026.0559  |
| log_s_Prevotella_bryantii       | Stroke              | Simple mode               | 11 | 0.9931 | 0.9557 | 1.0319 | 0.7293 | 0.0094  | 0.0201 | 0.6516 | 9.6440  | 0.3801 | -1026.0559  |
| log_s_Prevotella_bryantii       | Stroke              | Weighted mode             | 11 | 0.9934 | 0.9594 | 1.0287 | 0.7177 | 0.0094  | 0.0201 | 0.6516 | 9.6440  | 0.3801 | -1026.0559  |
| log_s_Prevotella_dentalis       | CardioEmbolicStroke | MR Egger                  | 6  | 1.1019 | 0.4896 | 2.4803 | 0.8261 | 0.0014  | 0.1624 | 0.9937 | 2.7364  | 0.6029 | -18597.0596 |
| log_s_Prevotella_dentalis       | CardioEmbolicStroke | Weighted median           | 6  | 1.0713 | 0.9106 | 1.2603 | 0.4062 | 0.0014  | 0.1624 | 0.9937 | 2.7364  | 0.6029 | -18597.0596 |
| log_s_Prevotella_dentalis       | CardioEmbolicStroke | Inverse variance weighted | 6  | 1.1057 | 0.9699 | 1.2606 | 0.1328 | 0.0014  | 0.1624 | 0.9937 | 2.7364  | 0.6029 | -18597.0596 |
| log_s_Prevotella_dentalis       | CardioEmbolicStroke | Simple mode               | 6  | 1.0528 | 0.8216 | 1.3492 | 0.7009 | 0.0014  | 0.1624 | 0.9937 | 2.7364  | 0.6029 | -18597.0596 |
| log_s_Prevotella_dentalis       | CardioEmbolicStroke | Weighted mode             | 6  | 1.0558 | 0.8522 | 1.3082 | 0.6402 | 0.0014  | 0.1624 | 0.9937 | 2.7364  | 0.6029 | -18597.0596 |
| log_s_Prevotella_dentalis       | IschemicStroke      | MR Egger                  | 7  | 0.9706 | 0.7709 | 1.2220 | 0.8095 | 0.0093  | 0.0476 | 0.8537 | 11.3989 | 0.0440 | -3044.8744  |
| log_s_Prevotella_dentalis       | IschemicStroke      | Weighted median           | 7  | 0.9920 | 0.9516 | 1.0341 | 0.7044 | 0.0093  | 0.0476 | 0.8537 | 11.3989 | 0.0440 | -3044.8744  |
| log_s_Prevotella_dentalis       | IschemicStroke      | Inverse variance weighted | 7  | 0.9926 | 0.9548 | 1.0319 | 0.7074 | 0.0093  | 0.0476 | 0.8537 | 11.3989 | 0.0440 | -3044.8744  |
| log_s_Prevotella_dentalis       | IschemicStroke      | Simple mode               | 7  | 1.0255 | 0.9586 | 1.0971 | 0.4919 | 0.0093  | 0.0476 | 0.8537 | 11.3989 | 0.0440 | -3044.8744  |
| log_s_Prevotella_dentalis       | IschemicStroke      | Weighted mode             | 7  | 0.9973 | 0.9397 | 1.0583 | 0.9311 | 0.0093  | 0.0476 | 0.8537 | 11.3989 | 0.0440 | -3044.8744  |
| log_s_Prevotella_dentalis       | LargeArteryStroke   | MR Egger                  | 6  | 0.7151 | 0.2793 | 1.8307 | 0.5229 | 0.1305  | 0.1883 | 0.5265 | 9.7041  | 0.0457 | -15012.6455 |
| log_s_Prevotella_dentalis       | LargeArteryStroke   | Weighted median           | 6  | 0.9876 | 0.8645 | 1.1282 | 0.8545 | 0.1305  | 0.1883 | 0.5265 | 9.7041  | 0.0457 | -15012.6455 |
| log_s_Prevotella_dentalis       | LargeArteryStroke   | Inverse variance weighted | 6  | 0.9926 | 0.8592 | 1.1468 | 0.9198 | 0.1305  | 0.1883 | 0.5265 | 9.7041  | 0.0457 | -15012.6455 |
| log_s_Prevotella_dentalis       | LargeArteryStroke   | Simple mode               | 6  | 0.9706 | 0.7821 | 1.2045 | 0.7974 | 0.1305  | 0.1883 | 0.5265 | 9.7041  | 0.0457 | -15012.6455 |
| log_s_Prevotella_dentalis       | LargeArteryStroke   | Weighted mode             | 6  | 0.9870 | 0.8236 | 1.1828 | 0.8926 | 0.1305  | 0.1883 | 0.5265 | 9.7041  | 0.0457 | -15012.6455 |
| log_s_Prevotella_dentalis       | SmallVesselStroke   | MR Egger                  | 6  | 1.1667 | 0.7714 | 1.7644 | 0.5056 | -0.0516 | 0.0828 | 0.5669 | 6.0796  | 0.1933 | -36924.2161 |
| log_s_Prevotella_dentalis       | SmallVesselStroke   | Weighted median           | 6  | 1.0282 | 0.9557 | 1.1063 | 0.4557 | -0.0516 | 0.0828 | 0.5669 | 6.0796  | 0.1933 | -36924.2161 |
| log_s_Prevotella_dentalis       | SmallVesselStroke   | Inverse variance weighted | 6  | 1.0247 | 0.9625 | 1.0908 | 0.4455 | -0.0516 | 0.0828 | 0.5669 | 6.0796  | 0.1933 | -36924.2161 |
| log_s_Prevotella_dentalis       | SmallVesselStroke   | Simple mode               | 6  | 1.0500 | 0.9415 | 1.1709 | 0.4208 | -0.0516 | 0.0828 | 0.5669 | 6.0796  | 0.1933 | -36924.2161 |
| log_s_Prevotella_dentalis       | SmallVesselStroke   | Weighted mode             | 6  | 1.0340 | 0.9348 | 1.1438 | 0.5445 | -0.0516 | 0.0828 | 0.5669 | 6.0796  | 0.1933 | -36924.2161 |
| log_s_Prevotella_dentalis       | Stroke              | MR Egger                  | 8  | 0.8896 | 0.7396 | 1.0700 | 0.2606 | 0.0449  | 0.0381 | 0.2832 | 16.9007 | 0.0180 | -2008.5453  |
| log_s_Prevotella_dentalis       | Stroke              | Weighted median           | 8  | 0.9917 | 0.9602 | 1.0241 | 0.6111 | 0.0449  | 0.0381 | 0.2832 | 16.9007 | 0.0180 | -2008.5453  |
| log_s_Prevotella_dentalis       | Stroke              | Inverse variance weighted | 8  | 0.9922 | 0.9582 | 1.0274 | 0.6584 | 0.0449  | 0.0381 | 0.2832 | 16.9007 | 0.0180 | -2008.5453  |
| log_s_Prevotella_dentalis       | Stroke              | Simple mode               | 8  | 0.9866 | 0.9403 | 1.0352 | 0.5996 | 0.0449  | 0.0381 | 0.2832 | 16.9007 | 0.0180 | -2008.5453  |
| log_s_Prevotella_dentalis       | Stroke              | Weighted mode             | 8  | 0.9894 | 0.9503 | 1.0301 | 0.6204 | 0.0449  | 0.0381 | 0.2832 | 16.9007 | 0.0180 | -2008.5453  |
| log_s_Prevotella_melaninogenica | CardioEmbolicStroke | MR Egger                  | 9  | 1.1697 | 0.7206 | 1.8986 | 0.5461 | -0.0556 | 0.1052 | 0.6131 | 11.6355 | 0.1132 | -151.7101   |
| log_s_Prevotella_melaninogenica | CardioEmbolicStroke | Weighted median           | 9  | 1.0472 | 0.9234 | 1.1875 | 0.4727 | -0.0556 | 0.1052 | 0.6131 | 11.6355 | 0.1132 | -151.7101   |
| log_s_Prevotella_melaninogenica | CardioEmbolicStroke | Inverse variance weighted | 9  | 1.0299 | 0.9260 | 1.1455 | 0.5866 | -0.0556 | 0.1052 | 0.6131 | 11.6355 | 0.1132 | -151.7101   |
| log_s_Prevotella_melaninogenica | CardioEmbolicStroke | Simple mode               | 9  | 0.9022 | 0.7192 | 1.1318 | 0.3995 | -0.0556 | 0.1052 | 0.6131 | 11.6355 | 0.1132 | -151.7101   |
| log_s_Prevotella_melaninogenica | CardioEmbolicStroke | Weighted mode             | 9  | 1.1175 | 0.8703 | 1.4348 | 0.4092 | -0.0556 | 0.1052 | 0.6131 | 11.6355 | 0.1132 | -151.7101   |
| log_s_Prevotella_melaninogenica | IschemicStroke      | MR Egger                  | 10 | 1.0688 | 0.9922 | 1.1512 | 0.1176 | -0.0319 | 0.0165 | 0.0895 | 11.1681 | 0.2644 | -351.5596   |
| log_s_Prevotella_melaninogenica | IschemicStroke      | Weighted median           | 10 | 0.9864 | 0.9595 | 1.0141 | 0.3332 | -0.0319 | 0.0165 | 0.0895 | 11.1681 | 0.2644 | -351.5596   |
| log_s_Prevotella_melaninogenica | IschemicStroke      | Inverse variance weighted | 10 | 0.9958 | 0.9745 | 1.0175 | 0.7018 | -0.0319 | 0.0165 | 0.0895 | 11.1681 | 0.2644 | -351.5596   |
| log_s_Prevotella_melaninogenica | IschemicStroke      | Simple mode               | 10 | 0.9816 | 0.9333 | 1.0324 | 0.4891 | -0.0319 | 0.0165 | 0.0895 | 11.1681 | 0.2644 | -351.5596   |
| log_s_Prevotella_melaninogenica | IschemicStroke      | Weighted mode             | 10 | 0.9816 | 0.9366 | 1.0287 | 0.4578 | -0.0319 | 0.0165 | 0.0895 | 11.1681 | 0.2644 | -351.5596   |
| log_s_Prevotella_melaninogenica | LargeArteryStroke   | MR Egger                  | 10 | 1.0496 | 0.8036 | 1.3709 | 0.7316 | -0.0105 | 0.0592 | 0.8641 | 9.6438  | 0.2909 | -51.4217    |
| log_s_Prevotella_melaninogenica | LargeArteryStroke   | Weighted median           | 10 | 1.0290 | 0.9447 | 1.1208 | 0.5118 | -0.0105 | 0.0592 | 0.8641 | 9.6438  | 0.2909 | -51.4217    |
| log_s_Prevotella_melaninogenica | LargeArteryStroke   | Inverse variance weighted | 10 | 1.0255 | 0.9606 | 1.0947 | 0.4509 | -0.0105 | 0.0592 | 0.8641 | 9.6438  | 0.2909 | -51.4217    |
| log_s_Prevotella_melaninogenica | LargeArteryStroke   | Simple mode               | 10 | 0.9742 | 0.8482 | 1.1189 | 0.7201 | -0.0105 | 0.0592 | 0.8641 | 9.6438  | 0.2909 | -51.4217    |
| log_s_Prevotella_melaninogenica | LargeArteryStroke   | Weighted mode             | 10 | 0.9933 | 0.8743 | 1.1285 | 0.9197 | -0.0105 | 0.0592 | 0.8641 | 9.6438  | 0.2909 | -51.4217    |
| log_s_Prevotella_melaninogenica | SmallVesselStroke   | MR Egger                  | 10 | 1.1278 | 0.9757 | 1.3036 | 0.1423 | -0.0531 | 0.0322 | 0.1376 | 12.5605 | 0.1835 | -186.2778   |
| log_s_Prevotella_melaninogenica | SmallVesselStroke   | Weighted median           | 10 | 1.0007 | 0.9507 | 1.0532 | 0.9799 | -0.0531 | 0.0322 | 0.1376 | 12.5605 | 0.1835 | -186.2778   |
| log_s_Prevotella_melaninogenica | SmallVesselStroke   | Inverse variance weighted | 10 | 1.0026 | 0.9620 | 1.0449 | 0.9020 | -0.0531 | 0.0322 | 0.1376 | 12.5605 | 0.1835 | -186.2778   |
| log_s_Prevotella_melaninogenica | SmallVesselStroke   | Simple mode               | 10 | 0.9883 | 0.9028 | 1.0819 | 0.8049 | -0.0531 | 0.0322 | 0.1376 | 12.5605 | 0.1835 | -186.2778   |
| log_s_Prevotella_melaninogenica | SmallVesselStroke   | Weighted mode             | 10 | 0.9851 | 0.8955 | 1.0837 | 0.7650 | -0.0531 | 0.0322 | 0.1376 | 12.5605 | 0.1835 | -186.2778   |
| log_s_Prevotella_melaninogenica | Stroke              | MR Egger                  | 10 | 1.0666 | 1.0010 | 1.1364 | 0.0816 | -0.0295 | 0.0141 | 0.0692 | 9.8420  | 0.3634 | -340.4093   |
| log_s_Prevotella_melaninogenica | Stroke              | Weighted median           | 10 | 0.9911 | 0.9688 | 1.0140 | 0.4447 | -0.0295 | 0.0141 | 0.0692 | 9.8420  | 0.3634 | -340.4093   |
| log_s_Prevotella_melaninogenica | Stroke              | Inverse variance weighted | 10 | 0.9990 | 0.9817 | 1.0165 | 0.9082 | -0.0295 | 0.0141 | 0.0692 | 9.8420  | 0.3634 | -340.4093   |
| log_s_Prevotella_melaninogenica | Stroke              | Simple mode               | 10 | 0.9858 | 0.9479 | 1.0251 | 0.4911 | -0.0295 | 0.0141 | 0.0692 | 9.8420  | 0.3634 | -340.4093   |
| log_s_Prevotella_melaninogenica | Stroke              | Weighted mode             | 10 | 0.9864 | 0.9500 | 1.0242 | 0.4944 | -0.0295 | 0.0141 | 0.0692 | 9.8420  | 0.3634 | -340.4093   |

|                                    |                     |                           |   |        |        |           |        |         |        |        |         |        |            |
|------------------------------------|---------------------|---------------------------|---|--------|--------|-----------|--------|---------|--------|--------|---------|--------|------------|
| log_s_Prevotella_multiformis       | CardioEmbolicStroke | MR Egger                  | 7 | 1.1861 | 0.7620 | 1.8463    | 0.4837 | -0.1075 | 0.1156 | 0.3951 | 5.2277  | 0.3887 | -84.9575   |
| log_s_Prevotella_multiformis       | CardioEmbolicStroke | Weighted median           | 7 | 0.9697 | 0.8379 | 1.1224    | 0.6804 | -0.1075 | 0.1156 | 0.3951 | 5.2277  | 0.3887 | -84.9575   |
| log_s_Prevotella_multiformis       | CardioEmbolicStroke | Inverse variance weighted | 7 | 0.9686 | 0.8637 | 1.0862    | 0.5852 | -0.1075 | 0.1156 | 0.3951 | 5.2277  | 0.3887 | -84.9575   |
| log_s_Prevotella_multiformis       | CardioEmbolicStroke | Simple mode               | 7 | 0.9317 | 0.7509 | 1.1560    | 0.5441 | -0.1075 | 0.1156 | 0.3951 | 5.2277  | 0.3887 | -84.9575   |
| log_s_Prevotella_multiformis       | CardioEmbolicStroke | Weighted mode             | 7 | 0.9695 | 0.8033 | 1.1700    | 0.7577 | -0.1075 | 0.1156 | 0.3951 | 5.2277  | 0.3887 | -84.9575   |
| log_s_Prevotella_multiformis       | IschemicStroke      | MR Egger                  | 7 | 0.9343 | 0.8117 | 1.0754    | 0.3871 | 0.0363  | 0.0367 | 0.3673 | 11.7101 | 0.0688 | -445.5789  |
| log_s_Prevotella_multiformis       | IschemicStroke      | Weighted median           | 7 | 0.9759 | 0.9400 | 1.0132    | 0.2026 | 0.0363  | 0.0367 | 0.3673 | 11.7101 | 0.0688 | -445.5789  |
| log_s_Prevotella_multiformis       | IschemicStroke      | Inverse variance weighted | 7 | 1.0007 | 0.9647 | 1.0380    | 0.9714 | 0.0363  | 0.0367 | 0.3673 | 11.7101 | 0.0688 | -445.5789  |
| log_s_Prevotella_multiformis       | IschemicStroke      | Simple mode               | 7 | 0.9699 | 0.9238 | 1.0182    | 0.2637 | 0.0363  | 0.0367 | 0.3673 | 11.7101 | 0.0688 | -445.5789  |
| log_s_Prevotella_multiformis       | IschemicStroke      | Weighted mode             | 7 | 0.9703 | 0.9217 | 1.0215    | 0.2947 | 0.0363  | 0.0367 | 0.3673 | 11.7101 | 0.0688 | -445.5789  |
| log_s_Prevotella_multiformis       | LargeArteryStroke   | MR Egger                  | 7 | 0.9169 | 0.6583 | 1.2772    | 0.6298 | 0.0615  | 0.0865 | 0.5087 | 5.2068  | 0.3912 | -114.5691  |
| log_s_Prevotella_multiformis       | LargeArteryStroke   | Weighted median           | 7 | 1.0247 | 0.9148 | 1.1478    | 0.6730 | 0.0615  | 0.0865 | 0.5087 | 5.2068  | 0.3912 | -114.5691  |
| log_s_Prevotella_multiformis       | LargeArteryStroke   | Inverse variance weighted | 7 | 1.0297 | 0.9454 | 1.1216    | 0.5016 | 0.0615  | 0.0865 | 0.5087 | 5.2068  | 0.3912 | -114.5691  |
| log_s_Prevotella_multiformis       | LargeArteryStroke   | Simple mode               | 7 | 1.0128 | 0.8615 | 1.1907    | 0.8824 | 0.0615  | 0.0865 | 0.5087 | 5.2068  | 0.3912 | -114.5691  |
| log_s_Prevotella_multiformis       | LargeArteryStroke   | Weighted mode             | 7 | 1.0032 | 0.8605 | 1.1695    | 0.9691 | 0.0615  | 0.0865 | 0.5087 | 5.2068  | 0.3912 | -114.5691  |
| log_s_Prevotella_multiformis       | SmallVesselStroke   | MR Egger                  | 7 | 0.9632 | 0.7254 | 1.2790    | 0.8059 | 0.0451  | 0.0740 | 0.5693 | 12.2641 | 0.0313 | -225.3917  |
| log_s_Prevotella_multiformis       | SmallVesselStroke   | Weighted median           | 7 | 1.0157 | 0.9461 | 1.0903    | 0.6678 | 0.0451  | 0.0740 | 0.5693 | 12.2641 | 0.0313 | -225.3917  |
| log_s_Prevotella_multiformis       | SmallVesselStroke   | Inverse variance weighted | 7 | 1.0486 | 0.9775 | 1.1250    | 0.1851 | 0.0451  | 0.0740 | 0.5693 | 12.2641 | 0.0313 | -225.3917  |
| log_s_Prevotella_multiformis       | SmallVesselStroke   | Simple mode               | 7 | 0.9815 | 0.8809 | 1.0936    | 0.7465 | 0.0451  | 0.0740 | 0.5693 | 12.2641 | 0.0313 | -225.3917  |
| log_s_Prevotella_multiformis       | SmallVesselStroke   | Weighted mode             | 7 | 0.9960 | 0.9145 | 1.0849    | 0.9304 | 0.0451  | 0.0740 | 0.5693 | 12.2641 | 0.0313 | -225.3917  |
| log_s_Prevotella_multiformis       | Stroke              | MR Egger                  | 7 | 0.9595 | 0.8715 | 1.0565    | 0.4385 | 0.0203  | 0.0251 | 0.4553 | 6.3313  | 0.2753 | -945.2499  |
| log_s_Prevotella_multiformis       | Stroke              | Weighted median           | 7 | 0.9923 | 0.9618 | 1.0237    | 0.6263 | 0.0203  | 0.0251 | 0.4553 | 6.3313  | 0.2753 | -945.2499  |
| log_s_Prevotella_multiformis       | Stroke              | Inverse variance weighted | 7 | 0.9971 | 0.9734 | 1.0213    | 0.8116 | 0.0203  | 0.0251 | 0.4553 | 6.3313  | 0.2753 | -945.2499  |
| log_s_Prevotella_multiformis       | Stroke              | Simple mode               | 7 | 0.9861 | 0.9394 | 1.0352    | 0.5934 | 0.0203  | 0.0251 | 0.4553 | 6.3313  | 0.2753 | -945.2499  |
| log_s_Prevotella_multiformis       | Stroke              | Weighted mode             | 7 | 0.9833 | 0.9375 | 1.0313    | 0.5145 | 0.0203  | 0.0251 | 0.4553 | 6.3313  | 0.2753 | -945.2499  |
| log_s_Prevotella_multisaccharivora | CardioEmbolicStroke | Inverse variance weighted | 2 | 1.1305 | 0.9516 | 1.3431    | 0.1628 | NA      | NA     | NA     | 0.4307  | 0.5117 | 248.8977   |
| log_s_Prevotella_multisaccharivora | IschemicStroke      | Inverse variance weighted | 2 | 0.9755 | 0.9303 | 1.0229    | 0.3060 | NA      | NA     | NA     | 1.4012  | 0.2365 | 1325.8323  |
| log_s_Prevotella_multisaccharivora | LargeArteryStroke   | Inverse variance weighted | 2 | 0.9158 | 0.8049 | 1.0420    | 0.1816 | NA      | NA     | NA     | 0.0256  | 0.8728 | 516.5811   |
| log_s_Prevotella_multisaccharivora | SmallVesselStroke   | Inverse variance weighted | 2 | 0.9804 | 0.9124 | 1.0535    | 0.5898 | NA      | NA     | NA     | 0.9461  | 0.3307 | 1517.9110  |
| log_s_Prevotella_multisaccharivora | Stroke              | MR Egger                  | 4 | 0.9550 | 0.8313 | 1.0971    | 0.5821 | 0.0190  | 0.0356 | 0.6460 | 3.5285  | 0.1713 | -1670.1630 |
| log_s_Prevotella_multisaccharivora | Stroke              | Weighted median           | 4 | 1.0081 | 0.9701 | 1.0476    | 0.6796 | 0.0190  | 0.0356 | 0.6460 | 3.5285  | 0.1713 | -1670.1630 |
| log_s_Prevotella_multisaccharivora | Stroke              | Inverse variance weighted | 4 | 0.9903 | 0.9563 | 1.0255    | 0.5838 | 0.0190  | 0.0356 | 0.6460 | 3.5285  | 0.1713 | -1670.1630 |
| log_s_Prevotella_multisaccharivora | Stroke              | Simple mode               | 4 | 1.0140 | 0.9516 | 1.0805    | 0.6973 | 0.0190  | 0.0356 | 0.6460 | 3.5285  | 0.1713 | -1670.1630 |
| log_s_Prevotella_multisaccharivora | Stroke              | Weighted mode             | 4 | 1.0127 | 0.9559 | 1.0729    | 0.6969 | 0.0190  | 0.0356 | 0.6460 | 3.5285  | 0.1713 | -1670.1630 |
| log_s_Prevotella_nigrescens        | CardioEmbolicStroke | MR Egger                  | 3 | 4.6077 | 0.0075 | 2833.5105 | 0.7222 | -0.5798 | 1.1782 | 0.7089 | 0.2565  | 0.6125 | 241.6220   |
| log_s_Prevotella_nigrescens        | CardioEmbolicStroke | Weighted median           | 3 | 0.9316 | 0.7673 | 1.1311    | 0.4743 | -0.5798 | 1.1782 | 0.7089 | 0.2565  | 0.6125 | 241.6220   |
| log_s_Prevotella_nigrescens        | CardioEmbolicStroke | Inverse variance weighted | 3 | 0.9193 | 0.7869 | 1.0741    | 0.2893 | -0.5798 | 1.1782 | 0.7089 | 0.2565  | 0.6125 | 241.6220   |
| log_s_Prevotella_nigrescens        | CardioEmbolicStroke | Simple mode               | 3 | 0.9423 | 0.7649 | 1.1607    | 0.6324 | -0.5798 | 1.1782 | 0.7089 | 0.2565  | 0.6125 | 241.6220   |
| log_s_Prevotella_nigrescens        | CardioEmbolicStroke | Weighted mode             | 3 | 0.9462 | 0.7644 | 1.1713    | 0.6622 | -0.5798 | 1.1782 | 0.7089 | 0.2565  | 0.6125 | 241.6220   |
| log_s_Prevotella_nigrescens        | IschemicStroke      | MR Egger                  | 4 | 1.1391 | 0.9259 | 1.4015    | 0.3432 | -0.0624 | 0.0396 | 0.2564 | 2.5389  | 0.4683 | 57739.2391 |
| log_s_Prevotella_nigrescens        | IschemicStroke      | Weighted median           | 4 | 0.9606 | 0.9223 | 1.0004    | 0.0525 | -0.0624 | 0.0396 | 0.2564 | 2.5389  | 0.4683 | 57739.2391 |
| log_s_Prevotella_nigrescens        | IschemicStroke      | Inverse variance weighted | 4 | 0.9667 | 0.9345 | 1.0001    | 0.0506 | -0.0624 | 0.0396 | 0.2564 | 2.5389  | 0.4683 | 57739.2391 |
| log_s_Prevotella_nigrescens        | IschemicStroke      | Simple mode               | 4 | 0.9598 | 0.9110 | 1.0113    | 0.2213 | -0.0624 | 0.0396 | 0.2564 | 2.5389  | 0.4683 | 57739.2391 |
| log_s_Prevotella_nigrescens        | IschemicStroke      | Weighted mode             | 4 | 0.9598 | 0.9176 | 1.0040    | 0.1722 | -0.0624 | 0.0396 | 0.2564 | 2.5389  | 0.4683 | 57739.2391 |
| log_s_Prevotella_nigrescens        | LargeArteryStroke   | MR Egger                  | 3 | 8.4534 | 0.0702 | 1017.8554 | 0.5430 | -0.7700 | 0.8790 | 0.5420 | 0.7929  | 0.6727 | 523.0772   |
| log_s_Prevotella_nigrescens        | LargeArteryStroke   | Weighted median           | 3 | 0.9613 | 0.8296 | 1.1138    | 0.5990 | -0.7700 | 0.8790 | 0.5420 | 0.7929  | 0.6727 | 523.0772   |
| log_s_Prevotella_nigrescens        | LargeArteryStroke   | Inverse variance weighted | 3 | 0.9939 | 0.8850 | 1.1163    | 0.9179 | -0.7700 | 0.8790 | 0.5420 | 0.7929  | 0.6727 | 523.0772   |
| log_s_Prevotella_nigrescens        | LargeArteryStroke   | Simple mode               | 3 | 0.9559 | 0.8134 | 1.1234    | 0.6390 | -0.7700 | 0.8790 | 0.5420 | 0.7929  | 0.6727 | 523.0772   |
| log_s_Prevotella_nigrescens        | LargeArteryStroke   | Weighted mode             | 3 | 0.9559 | 0.8063 | 1.1332    | 0.6552 | -0.7700 | 0.8790 | 0.5420 | 0.7929  | 0.6727 | 523.0772   |
| log_s_Prevotella_nigrescens        | SmallVesselStroke   | MR Egger                  | 3 | 0.5937 | 0.0415 | 8.4841    | 0.7664 | 0.1683  | 0.4880 | 0.7886 | 0.2412  | 0.6234 | 479.0910   |
| log_s_Prevotella_nigrescens        | SmallVesselStroke   | Weighted median           | 3 | 0.9402 | 0.8698 | 1.0163    | 0.1203 | 0.1683  | 0.4880 | 0.7886 | 0.2412  | 0.6234 | 479.0910   |
| log_s_Prevotella_nigrescens        | SmallVesselStroke   | Inverse variance weighted | 3 | 0.9478 | 0.8887 | 1.0108    | 0.1027 | 0.1683  | 0.4880 | 0.7886 | 0.2412  | 0.6234 | 479.0910   |
| log_s_Prevotella_nigrescens        | SmallVesselStroke   | Simple mode               | 3 | 0.9355 | 0.8546 | 1.0240    | 0.2852 | 0.1683  | 0.4880 | 0.7886 | 0.2412  | 0.6234 | 479.0910   |

|                             |                     |                           |    |        |        |        |        |         |        |        |         |        |             |
|-----------------------------|---------------------|---------------------------|----|--------|--------|--------|--------|---------|--------|--------|---------|--------|-------------|
| log_s_Prevotella_nigrescens | SmallVesselStroke   | Weighted mode             | 3  | 0.9351 | 0.8550 | 1.0226 | 0.2794 | 0.1683  | 0.4880 | 0.7886 | 0.2412  | 0.6234 | 479.0910    |
| log_s_Prevotella_nigrescens | Stroke              | MR Egger                  | 4  | 1.2654 | 1.0646 | 1.5041 | 0.1163 | -0.0995 | 0.0332 | 0.0955 | 9.7291  | 0.0210 | 29816.6229  |
| log_s_Prevotella_nigrescens | Stroke              | Weighted median           | 4  | 0.9612 | 0.9268 | 0.9968 | 0.0331 | -0.0995 | 0.0332 | 0.0955 | 9.7291  | 0.0210 | 29816.6229  |
| log_s_Prevotella_nigrescens | Stroke              | Inverse variance weighted | 4  | 0.9751 | 0.9250 | 1.0280 | 0.3495 | -0.0995 | 0.0332 | 0.0955 | 9.7291  | 0.0210 | 29816.6229  |
| log_s_Prevotella_nigrescens | Stroke              | Simple mode               | 4  | 0.9518 | 0.9108 | 0.9946 | 0.1150 | -0.0995 | 0.0332 | 0.0955 | 9.7291  | 0.0210 | 29816.6229  |
| log_s_Prevotella_nigrescens | Stroke              | Weighted mode             | 4  | 0.9545 | 0.9142 | 0.9966 | 0.1248 | -0.0995 | 0.0332 | 0.0955 | 9.7291  | 0.0210 | 29816.6229  |
| log_s_Prevotella_pallens    | CardioEmbolicStroke | MR Egger                  | 10 | 1.3377 | 0.7119 | 2.5136 | 0.3924 | -0.1154 | 0.1285 | 0.3954 | 15.8706 | 0.0696 | -162.2947   |
| log_s_Prevotella_pallens    | CardioEmbolicStroke | Weighted median           | 10 | 1.0466 | 0.9133 | 1.1994 | 0.5119 | -0.1154 | 0.1285 | 0.3954 | 15.8706 | 0.0696 | -162.2947   |
| log_s_Prevotella_pallens    | CardioEmbolicStroke | Inverse variance weighted | 10 | 1.0071 | 0.8964 | 1.1314 | 0.9057 | -0.1154 | 0.1285 | 0.3954 | 15.8706 | 0.0696 | -162.2947   |
| log_s_Prevotella_pallens    | CardioEmbolicStroke | Simple mode               | 10 | 1.1398 | 0.8925 | 1.4556 | 0.3218 | -0.1154 | 0.1285 | 0.3954 | 15.8706 | 0.0696 | -162.2947   |
| log_s_Prevotella_pallens    | CardioEmbolicStroke | Weighted mode             | 10 | 1.1398 | 0.8978 | 1.4470 | 0.3105 | -0.1154 | 0.1285 | 0.3954 | 15.8706 | 0.0696 | -162.2947   |
| log_s_Prevotella_pallens    | IschemicStroke      | MR Egger                  | 13 | 1.0097 | 0.9158 | 1.1133 | 0.8496 | -0.0039 | 0.0207 | 0.8539 | 15.6849 | 0.1532 | -218.7895   |
| log_s_Prevotella_pallens    | IschemicStroke      | Weighted median           | 13 | 1.0001 | 0.9724 | 1.0285 | 0.9971 | -0.0039 | 0.0207 | 0.8539 | 15.6849 | 0.1532 | -218.7895   |
| log_s_Prevotella_pallens    | IschemicStroke      | Inverse variance weighted | 13 | 1.0005 | 0.9789 | 1.0227 | 0.9616 | -0.0039 | 0.0207 | 0.8539 | 15.6849 | 0.1532 | -218.7895   |
| log_s_Prevotella_pallens    | IschemicStroke      | Simple mode               | 13 | 0.9987 | 0.9503 | 1.0496 | 0.9612 | -0.0039 | 0.0207 | 0.8539 | 15.6849 | 0.1532 | -218.7895   |
| log_s_Prevotella_pallens    | IschemicStroke      | Weighted mode             | 13 | 0.9933 | 0.9478 | 1.0411 | 0.7847 | -0.0039 | 0.0207 | 0.8539 | 15.6849 | 0.1532 | -218.7895   |
| log_s_Prevotella_pallens    | LargeArteryStroke   | MR Egger                  | 11 | 0.7860 | 0.5865 | 1.0532 | 0.1413 | 0.0919  | 0.0608 | 0.1652 | 4.2364  | 0.9361 | -135.0289   |
| log_s_Prevotella_pallens    | LargeArteryStroke   | Weighted median           | 11 | 0.9673 | 0.8931 | 1.0478 | 0.4151 | 0.0919  | 0.0608 | 0.1652 | 4.2364  | 0.9361 | -135.0289   |
| log_s_Prevotella_pallens    | LargeArteryStroke   | Inverse variance weighted | 11 | 0.9795 | 0.9190 | 1.0440 | 0.5250 | 0.0919  | 0.0608 | 0.1652 | 4.2364  | 0.9361 | -135.0289   |
| log_s_Prevotella_pallens    | LargeArteryStroke   | Simple mode               | 11 | 0.9596 | 0.8371 | 1.1000 | 0.5668 | 0.0919  | 0.0608 | 0.1652 | 4.2364  | 0.9361 | -135.0289   |
| log_s_Prevotella_pallens    | LargeArteryStroke   | Weighted mode             | 11 | 0.9569 | 0.8364 | 1.0947 | 0.5352 | 0.0919  | 0.0608 | 0.1652 | 4.2364  | 0.9361 | -135.0289   |
| log_s_Prevotella_pallens    | SmallVesselStroke   | MR Egger                  | 11 | 1.0366 | 0.8500 | 1.2641 | 0.7311 | -0.0062 | 0.0412 | 0.8845 | 13.5124 | 0.1408 | -124.7091   |
| log_s_Prevotella_pallens    | SmallVesselStroke   | Weighted median           | 11 | 1.0142 | 0.9637 | 1.0674 | 0.5874 | -0.0062 | 0.0412 | 0.8845 | 13.5124 | 0.1408 | -124.7091   |
| log_s_Prevotella_pallens    | SmallVesselStroke   | Inverse variance weighted | 11 | 1.0214 | 0.9800 | 1.0645 | 0.3164 | -0.0062 | 0.0412 | 0.8845 | 13.5124 | 0.1408 | -124.7091   |
| log_s_Prevotella_pallens    | SmallVesselStroke   | Simple mode               | 11 | 1.0149 | 0.9366 | 1.0998 | 0.7256 | -0.0062 | 0.0412 | 0.8845 | 13.5124 | 0.1408 | -124.7091   |
| log_s_Prevotella_pallens    | SmallVesselStroke   | Weighted mode             | 11 | 1.0100 | 0.9345 | 1.0916 | 0.8071 | -0.0062 | 0.0412 | 0.8845 | 13.5124 | 0.1408 | -124.7091   |
| log_s_Prevotella_pallens    | Stroke              | MR Egger                  | 13 | 1.0486 | 0.9809 | 1.1210 | 0.1910 | -0.0182 | 0.0143 | 0.2272 | 9.5121  | 0.6587 | -245.3575   |
| log_s_Prevotella_pallens    | Stroke              | Weighted median           | 13 | 1.0008 | 0.9784 | 1.0237 | 0.9476 | -0.0182 | 0.0143 | 0.2272 | 9.5121  | 0.6587 | -245.3575   |
| log_s_Prevotella_pallens    | Stroke              | Inverse variance weighted | 13 | 1.0052 | 0.9892 | 1.0215 | 0.5280 | -0.0182 | 0.0143 | 0.2272 | 9.5121  | 0.6587 | -245.3575   |
| log_s_Prevotella_pallens    | Stroke              | Simple mode               | 13 | 0.9967 | 0.9608 | 1.0339 | 0.8620 | -0.0182 | 0.0143 | 0.2272 | 9.5121  | 0.6587 | -245.3575   |
| log_s_Prevotella_pallens    | Stroke              | Weighted mode             | 13 | 0.9959 | 0.9607 | 1.0324 | 0.8267 | -0.0182 | 0.0143 | 0.2272 | 9.5121  | 0.6587 | -245.3575   |
| log_s_Prevotella_salivae    | CardioEmbolicStroke | MR Egger                  | 5  | 0.9099 | 0.4490 | 1.8441 | 0.8103 | 0.0865  | 0.1593 | 0.6249 | 4.3701  | 0.2242 | -4625.8670  |
| log_s_Prevotella_salivae    | CardioEmbolicStroke | Weighted median           | 5  | 1.0909 | 0.9171 | 1.2978 | 0.3257 | 0.0865  | 0.1593 | 0.6249 | 4.3701  | 0.2242 | -4625.8670  |
| log_s_Prevotella_salivae    | CardioEmbolicStroke | Inverse variance weighted | 5  | 1.1017 | 0.9615 | 1.2622 | 0.1631 | 0.0865  | 0.1593 | 0.6249 | 4.3701  | 0.2242 | -4625.8670  |
| log_s_Prevotella_salivae    | CardioEmbolicStroke | Simple mode               | 5  | 1.1832 | 0.9202 | 1.5214 | 0.2599 | 0.0865  | 0.1593 | 0.6249 | 4.3701  | 0.2242 | -4625.8670  |
| log_s_Prevotella_salivae    | CardioEmbolicStroke | Weighted mode             | 5  | 1.1426 | 0.8850 | 1.4751 | 0.3643 | 0.0865  | 0.1593 | 0.6249 | 4.3701  | 0.2242 | -4625.8670  |
| log_s_Prevotella_salivae    | IschemicStroke      | MR Egger                  | 5  | 1.0756 | 0.9395 | 1.2315 | 0.3684 | -0.0217 | 0.0305 | 0.5292 | 2.3615  | 0.5008 | -25443.1518 |
| log_s_Prevotella_salivae    | IschemicStroke      | Weighted median           | 5  | 1.0373 | 1.0012 | 1.0747 | 0.0430 | -0.0217 | 0.0305 | 0.5292 | 2.3615  | 0.5008 | -25443.1518 |
| log_s_Prevotella_salivae    | IschemicStroke      | Inverse variance weighted | 5  | 1.0254 | 0.9963 | 1.0553 | 0.0876 | -0.0217 | 0.0305 | 0.5292 | 2.3615  | 0.5008 | -25443.1518 |
| log_s_Prevotella_salivae    | IschemicStroke      | Simple mode               | 5  | 1.0444 | 0.9899 | 1.1019 | 0.1871 | -0.0217 | 0.0305 | 0.5292 | 2.3615  | 0.5008 | -25443.1518 |
| log_s_Prevotella_salivae    | IschemicStroke      | Weighted mode             | 5  | 1.0447 | 0.9899 | 1.1025 | 0.1871 | -0.0217 | 0.0305 | 0.5292 | 2.3615  | 0.5008 | -25443.1518 |
| log_s_Prevotella_salivae    | LargeArteryStroke   | MR Egger                  | 5  | 1.0758 | 0.6934 | 1.6692 | 0.7657 | -0.0376 | 0.0991 | 0.7296 | 0.4770  | 0.9239 | -22912.6699 |
| log_s_Prevotella_salivae    | LargeArteryStroke   | Weighted median           | 5  | 0.9832 | 0.8816 | 1.0964 | 0.7605 | -0.0376 | 0.0991 | 0.7296 | 0.4770  | 0.9239 | -22912.6699 |
| log_s_Prevotella_salivae    | LargeArteryStroke   | Inverse variance weighted | 5  | 0.9900 | 0.9021 | 1.0866 | 0.8331 | -0.0376 | 0.0991 | 0.7296 | 0.4770  | 0.9239 | -22912.6699 |
| log_s_Prevotella_salivae    | LargeArteryStroke   | Simple mode               | 5  | 0.9658 | 0.8411 | 1.1090 | 0.6476 | -0.0376 | 0.0991 | 0.7296 | 0.4770  | 0.9239 | -22912.6699 |
| log_s_Prevotella_salivae    | LargeArteryStroke   | Weighted mode             | 5  | 0.9690 | 0.8367 | 1.1223 | 0.6960 | -0.0376 | 0.0991 | 0.7296 | 0.4770  | 0.9239 | -22912.6699 |
| log_s_Prevotella_salivae    | SmallVesselStroke   | MR Egger                  | 5  | 1.0907 | 0.8562 | 1.3895 | 0.5328 | -0.0160 | 0.0548 | 0.7897 | 0.6802  | 0.8779 | -14819.9726 |
| log_s_Prevotella_salivae    | SmallVesselStroke   | Weighted median           | 5  | 1.0529 | 0.9842 | 1.1263 | 0.1341 | -0.0160 | 0.0548 | 0.7897 | 0.6802  | 0.8779 | -14819.9726 |
| log_s_Prevotella_salivae    | SmallVesselStroke   | Inverse variance weighted | 5  | 1.0530 | 1.0001 | 1.1088 | 0.0497 | -0.0160 | 0.0548 | 0.7897 | 0.6802  | 0.8779 | -14819.9726 |
| log_s_Prevotella_salivae    | SmallVesselStroke   | Simple mode               | 5  | 1.0416 | 0.9646 | 1.1247 | 0.3574 | -0.0160 | 0.0548 | 0.7897 | 0.6802  | 0.8779 | -14819.9726 |
| log_s_Prevotella_salivae    | SmallVesselStroke   | Weighted mode             | 5  | 1.0403 | 0.9557 | 1.1324 | 0.4130 | -0.0160 | 0.0548 | 0.7897 | 0.6802  | 0.8779 | -14819.9726 |
| log_s_Prevotella_salivae    | Stroke              | MR Egger                  | 5  | 1.0211 | 0.8450 | 1.2337 | 0.8430 | -0.0057 | 0.0389 | 0.8934 | 3.5970  | 0.3084 | 23615.0315  |
| log_s_Prevotella_salivae    | Stroke              | Weighted median           | 5  | 1.0072 | 0.9759 | 1.0395 | 0.6569 | -0.0057 | 0.0389 | 0.8934 | 3.5970  | 0.3084 | 23615.0315  |

|                            |                     |                           |   |        |        |         |        |         |        |        |         |        |            |
|----------------------------|---------------------|---------------------------|---|--------|--------|---------|--------|---------|--------|--------|---------|--------|------------|
| log_s_Prevotella_salivae   | Stroke              | Inverse variance weighted | 5 | 1.0070 | 0.9803 | 1.0343  | 0.6117 | -0.0057 | 0.0389 | 0.8934 | 3.5970  | 0.3084 | 23615.0315 |
| log_s_Prevotella_salivae   | Stroke              | Simple mode               | 5 | 1.0069 | 0.9661 | 1.0494  | 0.7602 | -0.0057 | 0.0389 | 0.8934 | 3.5970  | 0.3084 | 23615.0315 |
| log_s_Prevotella_salivae   | Stroke              | Weighted mode             | 5 | 1.0069 | 0.9680 | 1.0474  | 0.7489 | -0.0057 | 0.0389 | 0.8934 | 3.5970  | 0.3084 | 23615.0315 |
| log_s_Prevotella_veroralis | CardioEmbolicStroke | MR Egger                  | 4 | 1.3469 | 0.6198 | 2.9272  | 0.5305 | -0.1693 | 0.1559 | 0.3911 | 2.0365  | 0.5649 | 670.4645   |
| log_s_Prevotella_veroralis | CardioEmbolicStroke | Weighted median           | 4 | 0.9142 | 0.7688 | 1.0871  | 0.3100 | -0.1693 | 0.1559 | 0.3911 | 2.0365  | 0.5649 | 670.4645   |
| log_s_Prevotella_veroralis | CardioEmbolicStroke | Inverse variance weighted | 4 | 0.8822 | 0.7685 | 1.0127  | 0.0749 | -0.1693 | 0.1559 | 0.3911 | 2.0365  | 0.5649 | 670.4645   |
| log_s_Prevotella_veroralis | CardioEmbolicStroke | Simple mode               | 4 | 0.9173 | 0.7266 | 1.1580  | 0.5203 | -0.1693 | 0.1559 | 0.3911 | 2.0365  | 0.5649 | 670.4645   |
| log_s_Prevotella_veroralis | CardioEmbolicStroke | Weighted mode             | 4 | 0.9361 | 0.7565 | 1.1583  | 0.5864 | -0.1693 | 0.1559 | 0.3911 | 2.0365  | 0.5649 | 670.4645   |
| log_s_Prevotella_veroralis | IschemicStroke      | MR Egger                  | 7 | 0.9267 | 0.8362 | 1.0271  | 0.2065 | 0.0377  | 0.0223 | 0.1518 | 9.6759  | 0.1390 | -744.1600  |
| log_s_Prevotella_veroralis | IschemicStroke      | Weighted median           | 7 | 1.0260 | 0.9908 | 1.0625  | 0.1490 | 0.0377  | 0.0223 | 0.1518 | 9.6759  | 0.1390 | -744.1600  |
| log_s_Prevotella_veroralis | IschemicStroke      | Inverse variance weighted | 7 | 1.0091 | 0.9768 | 1.0425  | 0.5837 | 0.0377  | 0.0223 | 0.1518 | 9.6759  | 0.1390 | -744.1600  |
| log_s_Prevotella_veroralis | IschemicStroke      | Simple mode               | 7 | 1.0321 | 0.9831 | 1.0835  | 0.2501 | 0.0377  | 0.0223 | 0.1518 | 9.6759  | 0.1390 | -744.1600  |
| log_s_Prevotella_veroralis | IschemicStroke      | Weighted mode             | 7 | 1.0343 | 0.9844 | 1.0867  | 0.2298 | 0.0377  | 0.0223 | 0.1518 | 9.6759  | 0.1390 | -744.1600  |
| log_s_Prevotella_veroralis | LargeArteryStroke   | MR Egger                  | 4 | 1.1295 | 0.6340 | 2.0124  | 0.7195 | -0.0413 | 0.1162 | 0.7561 | 1.6247  | 0.4438 | 1621.9704  |
| log_s_Prevotella_veroralis | LargeArteryStroke   | Weighted median           | 4 | 1.0214 | 0.9030 | 1.1555  | 0.7360 | -0.0413 | 0.1162 | 0.7561 | 1.6247  | 0.4438 | 1621.9704  |
| log_s_Prevotella_veroralis | LargeArteryStroke   | Inverse variance weighted | 4 | 1.0188 | 0.9192 | 1.1293  | 0.7223 | -0.0413 | 0.1162 | 0.7561 | 1.6247  | 0.4438 | 1621.9704  |
| log_s_Prevotella_veroralis | LargeArteryStroke   | Simple mode               | 4 | 1.0166 | 0.8486 | 1.2179  | 0.8692 | -0.0413 | 0.1162 | 0.7561 | 1.6247  | 0.4438 | 1621.9704  |
| log_s_Prevotella_veroralis | LargeArteryStroke   | Weighted mode             | 4 | 1.0177 | 0.8697 | 1.1910  | 0.8406 | -0.0413 | 0.1162 | 0.7561 | 1.6247  | 0.4438 | 1621.9704  |
| log_s_Prevotella_veroralis | SmallVesselStroke   | MR Egger                  | 4 | 0.9199 | 0.6683 | 1.2662  | 0.6594 | 0.0373  | 0.0643 | 0.6204 | 1.8424  | 0.3980 | 3507.7633  |
| log_s_Prevotella_veroralis | SmallVesselStroke   | Weighted median           | 4 | 0.9898 | 0.9231 | 1.0614  | 0.7743 | 0.0373  | 0.0643 | 0.6204 | 1.8424  | 0.3980 | 3507.7633  |
| log_s_Prevotella_veroralis | SmallVesselStroke   | Inverse variance weighted | 4 | 1.0096 | 0.9536 | 1.0689  | 0.7425 | 0.0373  | 0.0643 | 0.6204 | 1.8424  | 0.3980 | 3507.7633  |
| log_s_Prevotella_veroralis | SmallVesselStroke   | Simple mode               | 4 | 0.9846 | 0.8948 | 1.0834  | 0.7710 | 0.0373  | 0.0643 | 0.6204 | 1.8424  | 0.3980 | 3507.7633  |
| log_s_Prevotella_veroralis | SmallVesselStroke   | Weighted mode             | 4 | 0.9839 | 0.9004 | 1.0751  | 0.7431 | 0.0373  | 0.0643 | 0.6204 | 1.8424  | 0.3980 | 3507.7633  |
| log_s_Prevotella_veroralis | Stroke              | MR Egger                  | 8 | 0.9837 | 0.8900 | 1.0873  | 0.7589 | 0.0178  | 0.0218 | 0.4447 | 9.9692  | 0.1260 | -384.2754  |
| log_s_Prevotella_veroralis | Stroke              | Weighted median           | 8 | 1.0248 | 0.9968 | 1.0535  | 0.0836 | 0.0178  | 0.0218 | 0.4447 | 9.9692  | 0.1260 | -384.2754  |
| log_s_Prevotella_veroralis | Stroke              | Inverse variance weighted | 8 | 1.0240 | 0.9970 | 1.0518  | 0.0821 | 0.0178  | 0.0218 | 0.4447 | 9.9692  | 0.1260 | -384.2754  |
| log_s_Prevotella_veroralis | Stroke              | Simple mode               | 8 | 1.0252 | 0.9856 | 1.0664  | 0.2551 | 0.0178  | 0.0218 | 0.4447 | 9.9692  | 0.1260 | -384.2754  |
| log_s_Prevotella_veroralis | Stroke              | Weighted mode             | 8 | 1.0279 | 0.9889 | 1.0684  | 0.2054 | 0.0178  | 0.0218 | 0.4447 | 9.9692  | 0.1260 | -384.2754  |
| log_s_Pseudomonas_stutzeri | CardioEmbolicStroke | MR Egger                  | 5 | 1.1984 | 0.1433 | 10.0250 | 0.8780 | -0.0919 | 0.4740 | 0.8586 | 10.5822 | 0.0142 | 55217.7424 |
| log_s_Pseudomonas_stutzeri | CardioEmbolicStroke | Weighted median           | 5 | 1.0604 | 0.9023 | 1.2461  | 0.4764 | -0.0919 | 0.4740 | 0.8586 | 10.5822 | 0.0142 | 55217.7424 |
| log_s_Pseudomonas_stutzeri | CardioEmbolicStroke | Inverse variance weighted | 5 | 0.9724 | 0.8007 | 1.1810  | 0.7779 | -0.0919 | 0.4740 | 0.8586 | 10.5822 | 0.0142 | 55217.7424 |
| log_s_Pseudomonas_stutzeri | CardioEmbolicStroke | Simple mode               | 5 | 1.0612 | 0.8870 | 1.2696  | 0.5517 | -0.0919 | 0.4740 | 0.8586 | 10.5822 | 0.0142 | 55217.7424 |
| log_s_Pseudomonas_stutzeri | CardioEmbolicStroke | Weighted mode             | 5 | 1.0743 | 0.9027 | 1.2785  | 0.4647 | -0.0919 | 0.4740 | 0.8586 | 10.5822 | 0.0142 | 55217.7424 |
| log_s_Pseudomonas_stutzeri | IschemicStroke      | MR Egger                  | 8 | 1.1456 | 1.0334 | 1.2700  | 0.0416 | -0.0696 | 0.0250 | 0.0319 | 11.2317 | 0.1288 | -200.9593  |
| log_s_Pseudomonas_stutzeri | IschemicStroke      | Weighted median           | 8 | 0.9781 | 0.9488 | 1.0082  | 0.1525 | -0.0696 | 0.0250 | 0.0319 | 11.2317 | 0.1288 | -200.9593  |
| log_s_Pseudomonas_stutzeri | IschemicStroke      | Inverse variance weighted | 8 | 0.9935 | 0.9642 | 1.0236  | 0.6677 | -0.0696 | 0.0250 | 0.0319 | 11.2317 | 0.1288 | -200.9593  |
| log_s_Pseudomonas_stutzeri | IschemicStroke      | Simple mode               | 8 | 0.9748 | 0.9321 | 1.0195  | 0.3013 | -0.0696 | 0.0250 | 0.0319 | 11.2317 | 0.1288 | -200.9593  |
| log_s_Pseudomonas_stutzeri | IschemicStroke      | Weighted mode             | 8 | 0.9767 | 0.9401 | 1.0147  | 0.2653 | -0.0696 | 0.0250 | 0.0319 | 11.2317 | 0.1288 | -200.9593  |
| log_s_Pseudomonas_stutzeri | LargeArteryStroke   | MR Egger                  | 6 | 0.8589 | 0.3892 | 1.8953  | 0.7255 | 0.0374  | 0.1830 | 0.8479 | 9.6978  | 0.0458 | -523.2995  |
| log_s_Pseudomonas_stutzeri | LargeArteryStroke   | Weighted median           | 6 | 0.9912 | 0.8803 | 1.1162  | 0.8843 | 0.0374  | 0.1830 | 0.8479 | 9.6978  | 0.0458 | -523.2995  |
| log_s_Pseudomonas_stutzeri | LargeArteryStroke   | Inverse variance weighted | 6 | 0.9318 | 0.8290 | 1.0473  | 0.2362 | 0.0374  | 0.1830 | 0.8479 | 9.6978  | 0.0458 | -523.2995  |
| log_s_Pseudomonas_stutzeri | LargeArteryStroke   | Simple mode               | 6 | 1.0412 | 0.8409 | 1.2892  | 0.7265 | 0.0374  | 0.1830 | 0.8479 | 9.6978  | 0.0458 | -523.2995  |
| log_s_Pseudomonas_stutzeri | LargeArteryStroke   | Weighted mode             | 6 | 1.0456 | 0.8627 | 1.2671  | 0.6687 | 0.0374  | 0.1830 | 0.8479 | 9.6978  | 0.0458 | -523.2995  |
| log_s_Pseudomonas_stutzeri | SmallVesselStroke   | MR Egger                  | 7 | 1.1135 | 0.9195 | 1.3484  | 0.3213 | -0.0552 | 0.0460 | 0.2842 | 4.8010  | 0.5696 | -327.5069  |
| log_s_Pseudomonas_stutzeri | SmallVesselStroke   | Weighted median           | 7 | 0.9982 | 0.9419 | 1.0578  | 0.9504 | -0.0552 | 0.0460 | 0.2842 | 4.8010  | 0.5696 | -327.5069  |
| log_s_Pseudomonas_stutzeri | SmallVesselStroke   | Inverse variance weighted | 7 | 0.9935 | 0.9508 | 1.0382  | 0.7720 | -0.0552 | 0.0460 | 0.2842 | 4.8010  | 0.5696 | -327.5069  |
| log_s_Pseudomonas_stutzeri | SmallVesselStroke   | Simple mode               | 7 | 1.0300 | 0.9396 | 1.1292  | 0.5514 | -0.0552 | 0.0460 | 0.2842 | 4.8010  | 0.5696 | -327.5069  |
| log_s_Pseudomonas_stutzeri | SmallVesselStroke   | Weighted mode             | 7 | 1.0196 | 0.9260 | 1.1226  | 0.7067 | -0.0552 | 0.0460 | 0.2842 | 4.8010  | 0.5696 | -327.5069  |
| log_s_Pseudomonas_stutzeri | Stroke              | MR Egger                  | 8 | 1.1065 | 1.0152 | 1.2061  | 0.0609 | -0.0529 | 0.0210 | 0.0457 | 7.9076  | 0.3408 | -399.0728  |
| log_s_Pseudomonas_stutzeri | Stroke              | Weighted median           | 8 | 0.9929 | 0.9667 | 1.0199  | 0.6044 | -0.0529 | 0.0210 | 0.0457 | 7.9076  | 0.3408 | -399.0728  |
| log_s_Pseudomonas_stutzeri | Stroke              | Inverse variance weighted | 8 | 0.9938 | 0.9728 | 1.0152  | 0.5678 | -0.0529 | 0.0210 | 0.0457 | 7.9076  | 0.3408 | -399.0728  |
| log_s_Pseudomonas_stutzeri | Stroke              | Simple mode               | 8 | 0.9821 | 0.9400 | 1.0261  | 0.4462 | -0.0529 | 0.0210 | 0.0457 | 7.9076  | 0.3408 | -399.0728  |
| log_s_Pseudomonas_stutzeri | Stroke              | Weighted mode             | 8 | 0.9865 | 0.9469 | 1.0279  | 0.5384 | -0.0529 | 0.0210 | 0.0457 | 7.9076  | 0.3408 | -399.0728  |

|                                 |                     |                           |    |        |        |        |        |         |        |        |         |        |            |
|---------------------------------|---------------------|---------------------------|----|--------|--------|--------|--------|---------|--------|--------|---------|--------|------------|
| log_s_Ruminococcus_flavefaciens | CardioEmbolicStroke | MR Egger                  | 13 | 0.7913 | 0.5207 | 1.2023 | 0.2961 | 0.0924  | 0.0979 | 0.3657 | 19.3759 | 0.0799 | -23.8019   |
| log_s_Ruminococcus_flavefaciens | CardioEmbolicStroke | Weighted median           | 13 | 0.9549 | 0.8563 | 1.0648 | 0.4064 | 0.0924  | 0.0979 | 0.3657 | 19.3759 | 0.0799 | -23.8019   |
| log_s_Ruminococcus_flavefaciens | CardioEmbolicStroke | Inverse variance weighted | 13 | 0.9629 | 0.8777 | 1.0564 | 0.4240 | 0.0924  | 0.0979 | 0.3657 | 19.3759 | 0.0799 | -23.8019   |
| log_s_Ruminococcus_flavefaciens | CardioEmbolicStroke | Simple mode               | 13 | 0.9315 | 0.7440 | 1.1663 | 0.5476 | 0.0924  | 0.0979 | 0.3657 | 19.3759 | 0.0799 | -23.8019   |
| log_s_Ruminococcus_flavefaciens | CardioEmbolicStroke | Weighted mode             | 13 | 0.9467 | 0.7619 | 1.1762 | 0.6297 | 0.0924  | 0.0979 | 0.3657 | 19.3759 | 0.0799 | -23.8019   |
| log_s_Ruminococcus_flavefaciens | IschemicStroke      | MR Egger                  | 15 | 1.0187 | 0.9395 | 1.1046 | 0.6611 | -0.0052 | 0.0187 | 0.7876 | 17.0159 | 0.1986 | -152.6727  |
| log_s_Ruminococcus_flavefaciens | IschemicStroke      | Weighted median           | 15 | 1.0126 | 0.9895 | 1.0363 | 0.2875 | -0.0052 | 0.0187 | 0.7876 | 17.0159 | 0.1986 | -152.6727  |
| log_s_Ruminococcus_flavefaciens | IschemicStroke      | Inverse variance weighted | 15 | 1.0075 | 0.9897 | 1.0256 | 0.4122 | -0.0052 | 0.0187 | 0.7876 | 17.0159 | 0.1986 | -152.6727  |
| log_s_Ruminococcus_flavefaciens | IschemicStroke      | Simple mode               | 15 | 1.0123 | 0.9726 | 1.0535 | 0.5593 | -0.0052 | 0.0187 | 0.7876 | 17.0159 | 0.1986 | -152.6727  |
| log_s_Ruminococcus_flavefaciens | IschemicStroke      | Weighted mode             | 15 | 1.0106 | 0.9698 | 1.0531 | 0.6240 | -0.0052 | 0.0187 | 0.7876 | 17.0159 | 0.1986 | -152.6727  |
| log_s_Ruminococcus_flavefaciens | LargeArteryStroke   | MR Egger                  | 14 | 1.0894 | 0.8550 | 1.3883 | 0.5016 | -0.0395 | 0.0570 | 0.5008 | 12.2632 | 0.4248 | -42.2920   |
| log_s_Ruminococcus_flavefaciens | LargeArteryStroke   | Weighted median           | 14 | 1.0285 | 0.9554 | 1.1072 | 0.4547 | -0.0395 | 0.0570 | 0.5008 | 12.2632 | 0.4248 | -42.2920   |
| log_s_Ruminococcus_flavefaciens | LargeArteryStroke   | Inverse variance weighted | 14 | 1.0020 | 0.9493 | 1.0577 | 0.9410 | -0.0395 | 0.0570 | 0.5008 | 12.2632 | 0.4248 | -42.2920   |
| log_s_Ruminococcus_flavefaciens | LargeArteryStroke   | Simple mode               | 14 | 1.0396 | 0.9073 | 1.1913 | 0.5854 | -0.0395 | 0.0570 | 0.5008 | 12.2632 | 0.4248 | -42.2920   |
| log_s_Ruminococcus_flavefaciens | LargeArteryStroke   | Weighted mode             | 14 | 1.0422 | 0.9199 | 1.1807 | 0.5281 | -0.0395 | 0.0570 | 0.5008 | 12.2632 | 0.4248 | -42.2920   |
| log_s_Ruminococcus_flavefaciens | SmallVesselStroke   | MR Egger                  | 14 | 1.0172 | 0.8912 | 1.1610 | 0.8047 | -0.0050 | 0.0311 | 0.8752 | 10.2889 | 0.5906 | -109.7464  |
| log_s_Ruminococcus_flavefaciens | SmallVesselStroke   | Weighted median           | 14 | 1.0037 | 0.9629 | 1.0462 | 0.8614 | -0.0050 | 0.0311 | 0.8752 | 10.2889 | 0.5906 | -109.7464  |
| log_s_Ruminococcus_flavefaciens | SmallVesselStroke   | Inverse variance weighted | 14 | 1.0065 | 0.9768 | 1.0371 | 0.6699 | -0.0050 | 0.0311 | 0.8752 | 10.2889 | 0.5906 | -109.7464  |
| log_s_Ruminococcus_flavefaciens | SmallVesselStroke   | Simple mode               | 14 | 1.0022 | 0.9342 | 1.0753 | 0.9511 | -0.0050 | 0.0311 | 0.8752 | 10.2889 | 0.5906 | -109.7464  |
| log_s_Ruminococcus_flavefaciens | SmallVesselStroke   | Weighted mode             | 14 | 0.9997 | 0.9317 | 1.0726 | 0.9936 | -0.0050 | 0.0311 | 0.8752 | 10.2889 | 0.5906 | -109.7464  |
| log_s_Ruminococcus_flavefaciens | Stroke              | MR Egger                  | 15 | 0.9919 | 0.9198 | 1.0697 | 0.8355 | 0.0050  | 0.0174 | 0.7774 | 20.8775 | 0.0754 | -171.4755  |
| log_s_Ruminococcus_flavefaciens | Stroke              | Weighted median           | 15 | 1.0114 | 0.9910 | 1.0322 | 0.2749 | 0.0050  | 0.0174 | 0.7774 | 20.8775 | 0.0754 | -171.4755  |
| log_s_Ruminococcus_flavefaciens | Stroke              | Inverse variance weighted | 15 | 1.0027 | 0.9859 | 1.0197 | 0.7575 | 0.0050  | 0.0174 | 0.7774 | 20.8775 | 0.0754 | -171.4755  |
| log_s_Ruminococcus_flavefaciens | Stroke              | Simple mode               | 15 | 1.0212 | 0.9869 | 1.0568 | 0.2481 | 0.0050  | 0.0174 | 0.7774 | 20.8775 | 0.0754 | -171.4755  |
| log_s_Ruminococcus_flavefaciens | Stroke              | Weighted mode             | 15 | 1.0195 | 0.9866 | 1.0534 | 0.2678 | 0.0050  | 0.0174 | 0.7774 | 20.8775 | 0.0754 | -171.4755  |
| log_s_Serratia_odorifera        | CardioEmbolicStroke | MR Egger                  | 9  | 1.3750 | 0.4531 | 4.1727 | 0.5915 | -0.1357 | 0.2301 | 0.5740 | 2.1139  | 0.9533 | -1184.4792 |
| log_s_Serratia_odorifera        | CardioEmbolicStroke | Weighted median           | 9  | 0.9690 | 0.8626 | 1.0887 | 0.5964 | -0.1357 | 0.2301 | 0.5740 | 2.1139  | 0.9533 | -1184.4792 |
| log_s_Serratia_odorifera        | CardioEmbolicStroke | Inverse variance weighted | 9  | 0.9857 | 0.8977 | 1.0824 | 0.7634 | -0.1357 | 0.2301 | 0.5740 | 2.1139  | 0.9533 | -1184.4792 |
| log_s_Serratia_odorifera        | CardioEmbolicStroke | Simple mode               | 9  | 0.9556 | 0.8119 | 1.1248 | 0.6002 | -0.1357 | 0.2301 | 0.5740 | 2.1139  | 0.9533 | -1184.4792 |
| log_s_Serratia_odorifera        | CardioEmbolicStroke | Weighted mode             | 9  | 0.9602 | 0.8116 | 1.1360 | 0.6486 | -0.1357 | 0.2301 | 0.5740 | 2.1139  | 0.9533 | -1184.4792 |
| log_s_Serratia_odorifera        | IschemicStroke      | MR Egger                  | 9  | 0.8191 | 0.6160 | 1.0890 | 0.2121 | 0.0736  | 0.0591 | 0.2531 | 10.6407 | 0.2229 | -2435.3138 |
| log_s_Serratia_odorifera        | IschemicStroke      | Weighted median           | 9  | 0.9793 | 0.9500 | 1.0096 | 0.1783 | 0.0736  | 0.0591 | 0.2531 | 10.6407 | 0.2229 | -2435.3138 |
| log_s_Serratia_odorifera        | IschemicStroke      | Inverse variance weighted | 9  | 0.9810 | 0.9569 | 1.0056 | 0.1291 | 0.0736  | 0.0591 | 0.2531 | 10.6407 | 0.2229 | -2435.3138 |
| log_s_Serratia_odorifera        | IschemicStroke      | Simple mode               | 9  | 0.9610 | 0.9073 | 1.0178 | 0.2117 | 0.0736  | 0.0591 | 0.2531 | 10.6407 | 0.2229 | -2435.3138 |
| log_s_Serratia_odorifera        | IschemicStroke      | Weighted mode             | 9  | 0.9642 | 0.9161 | 1.0149 | 0.2008 | 0.0736  | 0.0591 | 0.2531 | 10.6407 | 0.2229 | -2435.3138 |
| log_s_Serratia_odorifera        | LargeArteryStroke   | MR Egger                  | 9  | 0.9720 | 0.4239 | 2.2288 | 0.9483 | 0.0082  | 0.1720 | 0.9635 | 6.2261  | 0.5136 | -874.6194  |
| log_s_Serratia_odorifera        | LargeArteryStroke   | Weighted median           | 9  | 1.0367 | 0.9416 | 1.1415 | 0.4625 | 0.0082  | 0.1720 | 0.9635 | 6.2261  | 0.5136 | -874.6194  |
| log_s_Serratia_odorifera        | LargeArteryStroke   | Inverse variance weighted | 9  | 0.9916 | 0.9247 | 1.0635 | 0.8139 | 0.0082  | 0.1720 | 0.9635 | 6.2261  | 0.5136 | -874.6194  |
| log_s_Serratia_odorifera        | LargeArteryStroke   | Simple mode               | 9  | 1.0674 | 0.9217 | 1.2360 | 0.4090 | 0.0082  | 0.1720 | 0.9635 | 6.2261  | 0.5136 | -874.6194  |
| log_s_Serratia_odorifera        | LargeArteryStroke   | Weighted mode             | 9  | 1.0650 | 0.9212 | 1.2314 | 0.4196 | 0.0082  | 0.1720 | 0.9635 | 6.2261  | 0.5136 | -874.6194  |
| log_s_Serratia_odorifera        | SmallVesselStroke   | MR Egger                  | 9  | 0.9941 | 0.5357 | 1.8447 | 0.9854 | 0.0071  | 0.1282 | 0.9572 | 12.5695 | 0.0833 | -1050.8614 |
| log_s_Serratia_odorifera        | SmallVesselStroke   | Weighted median           | 9  | 0.9888 | 0.9348 | 1.0458 | 0.6926 | 0.0071  | 0.1282 | 0.9572 | 12.5695 | 0.0833 | -1050.8614 |
| log_s_Serratia_odorifera        | SmallVesselStroke   | Inverse variance weighted | 9  | 1.0116 | 0.9635 | 1.0621 | 0.6427 | 0.0071  | 0.1282 | 0.9572 | 12.5695 | 0.0833 | -1050.8614 |
| log_s_Serratia_odorifera        | SmallVesselStroke   | Simple mode               | 9  | 0.9749 | 0.8915 | 1.0662 | 0.5936 | 0.0071  | 0.1282 | 0.9572 | 12.5695 | 0.0833 | -1050.8614 |
| log_s_Serratia_odorifera        | SmallVesselStroke   | Weighted mode             | 9  | 0.9710 | 0.8919 | 1.0571 | 0.5164 | 0.0071  | 0.1282 | 0.9572 | 12.5695 | 0.0833 | -1050.8614 |
| log_s_Serratia_odorifera        | Stroke              | MR Egger                  | 9  | 0.8056 | 0.6255 | 1.0376 | 0.1380 | 0.0825  | 0.0525 | 0.1603 | 12.7651 | 0.1202 | -2803.5682 |
| log_s_Serratia_odorifera        | Stroke              | Weighted median           | 9  | 0.9828 | 0.9561 | 1.0103 | 0.2186 | 0.0825  | 0.0525 | 0.1603 | 12.7651 | 0.1202 | -2803.5682 |
| log_s_Serratia_odorifera        | Stroke              | Inverse variance weighted | 9  | 0.9860 | 0.9634 | 1.0091 | 0.2317 | 0.0825  | 0.0525 | 0.1603 | 12.7651 | 0.1202 | -2803.5682 |
| log_s_Serratia_odorifera        | Stroke              | Simple mode               | 9  | 1.0195 | 0.9687 | 1.0729 | 0.4796 | 0.0825  | 0.0525 | 0.1603 | 12.7651 | 0.1202 | -2803.5682 |
| log_s_Serratia_odorifera        | Stroke              | Weighted mode             | 9  | 0.9666 | 0.9220 | 1.0134 | 0.1967 | 0.0825  | 0.0525 | 0.1603 | 12.7651 | 0.1202 | -2803.5682 |
| log_s_Shewanella_putrefaciens   | CardioEmbolicStroke | MR Egger                  | 8  | 0.9939 | 0.5356 | 1.8442 | 0.9851 | -0.0274 | 0.1261 | 0.8351 | 3.4299  | 0.7533 | -806.0883  |
| log_s_Shewanella_putrefaciens   | CardioEmbolicStroke | Weighted median           | 8  | 0.9708 | 0.8593 | 1.0968 | 0.6344 | -0.0274 | 0.1261 | 0.8351 | 3.4299  | 0.7533 | -806.0883  |
| log_s_Shewanella_putrefaciens   | CardioEmbolicStroke | Inverse variance weighted | 8  | 0.9288 | 0.8410 | 1.0259 | 0.1454 | -0.0274 | 0.1261 | 0.8351 | 3.4299  | 0.7533 | -806.0883  |

|                               |                     |                           |    |        |        |        |        |         |        |        |         |        |            |
|-------------------------------|---------------------|---------------------------|----|--------|--------|--------|--------|---------|--------|--------|---------|--------|------------|
| log_s_Shewanella_putrefaciens | CardioEmbolicStroke | Simple mode               | 8  | 0.9900 | 0.8155 | 1.2019 | 0.9221 | -0.0274 | 0.1261 | 0.8351 | 3.4299  | 0.7533 | -806.0883  |
| log_s_Shewanella_putrefaciens | CardioEmbolicStroke | Weighted mode             | 8  | 0.9865 | 0.8086 | 1.2036 | 0.8974 | -0.0274 | 0.1261 | 0.8351 | 3.4299  | 0.7533 | -806.0883  |
| log_s_Shewanella_putrefaciens | IschemicStroke      | MR Egger                  | 12 | 1.0705 | 0.9709 | 1.1802 | 0.2014 | -0.0294 | 0.0215 | 0.2009 | 17.9715 | 0.0822 | -181.2876  |
| log_s_Shewanella_putrefaciens | IschemicStroke      | Weighted median           | 12 | 0.9966 | 0.9659 | 1.0283 | 0.8321 | -0.0294 | 0.0215 | 0.2009 | 17.9715 | 0.0822 | -181.2876  |
| log_s_Shewanella_putrefaciens | IschemicStroke      | Inverse variance weighted | 12 | 1.0023 | 0.9762 | 1.0291 | 0.8660 | -0.0294 | 0.0215 | 0.2009 | 17.9715 | 0.0822 | -181.2876  |
| log_s_Shewanella_putrefaciens | IschemicStroke      | Simple mode               | 12 | 0.9916 | 0.9341 | 1.0526 | 0.7868 | -0.0294 | 0.0215 | 0.2009 | 17.9715 | 0.0822 | -181.2876  |
| log_s_Shewanella_putrefaciens | IschemicStroke      | Weighted mode             | 12 | 0.9875 | 0.9349 | 1.0430 | 0.6612 | -0.0294 | 0.0215 | 0.2009 | 17.9715 | 0.0822 | -181.2876  |
| log_s_Shewanella_putrefaciens | LargeArteryStroke   | MR Egger                  | 10 | 1.1648 | 0.8398 | 1.6156 | 0.3873 | -0.0492 | 0.0696 | 0.4999 | 7.2369  | 0.5113 | -107.5644  |
| log_s_Shewanella_putrefaciens | LargeArteryStroke   | Weighted median           | 10 | 1.0100 | 0.9208 | 1.1079 | 0.8332 | -0.0492 | 0.0696 | 0.4999 | 7.2369  | 0.5113 | -107.5644  |
| log_s_Shewanella_putrefaciens | LargeArteryStroke   | Inverse variance weighted | 10 | 1.0380 | 0.9684 | 1.1127 | 0.2919 | -0.0492 | 0.0696 | 0.4999 | 7.2369  | 0.5113 | -107.5644  |
| log_s_Shewanella_putrefaciens | LargeArteryStroke   | Simple mode               | 10 | 0.9935 | 0.8706 | 1.1338 | 0.9254 | -0.0492 | 0.0696 | 0.4999 | 7.2369  | 0.5113 | -107.5644  |
| log_s_Shewanella_putrefaciens | LargeArteryStroke   | Weighted mode             | 10 | 1.0040 | 0.8838 | 1.1406 | 0.9522 | -0.0492 | 0.0696 | 0.4999 | 7.2369  | 0.5113 | -107.5644  |
| log_s_Shewanella_putrefaciens | SmallVesselStroke   | MR Egger                  | 10 | 1.1189 | 0.8965 | 1.3965 | 0.3493 | -0.0416 | 0.0471 | 0.4027 | 11.7412 | 0.1631 | -232.2986  |
| log_s_Shewanella_putrefaciens | SmallVesselStroke   | Weighted median           | 10 | 1.0241 | 0.9665 | 1.0851 | 0.4197 | -0.0416 | 0.0471 | 0.4027 | 11.7412 | 0.1631 | -232.2986  |
| log_s_Shewanella_putrefaciens | SmallVesselStroke   | Inverse variance weighted | 10 | 1.0149 | 0.9687 | 1.0633 | 0.5338 | -0.0416 | 0.0471 | 0.4027 | 11.7412 | 0.1631 | -232.2986  |
| log_s_Shewanella_putrefaciens | SmallVesselStroke   | Simple mode               | 10 | 0.9741 | 0.8745 | 1.0851 | 0.6452 | -0.0416 | 0.0471 | 0.4027 | 11.7412 | 0.1631 | -232.2986  |
| log_s_Shewanella_putrefaciens | SmallVesselStroke   | Weighted mode             | 10 | 1.0144 | 0.9139 | 1.1259 | 0.7943 | -0.0416 | 0.0471 | 0.4027 | 11.7412 | 0.1631 | -232.2986  |
| log_s_Shewanella_putrefaciens | Stroke              | MR Egger                  | 13 | 1.0512 | 0.9751 | 1.1331 | 0.2194 | -0.0209 | 0.0167 | 0.2376 | 17.0992 | 0.1459 | -158.3063  |
| log_s_Shewanella_putrefaciens | Stroke              | Weighted median           | 13 | 1.0059 | 0.9804 | 1.0321 | 0.6533 | -0.0209 | 0.0167 | 0.2376 | 17.0992 | 0.1459 | -158.3063  |
| log_s_Shewanella_putrefaciens | Stroke              | Inverse variance weighted | 13 | 1.0038 | 0.9835 | 1.0245 | 0.7178 | -0.0209 | 0.0167 | 0.2376 | 17.0992 | 0.1459 | -158.3063  |
| log_s_Shewanella_putrefaciens | Stroke              | Simple mode               | 13 | 0.9975 | 0.9539 | 1.0431 | 0.9141 | -0.0209 | 0.0167 | 0.2376 | 17.0992 | 0.1459 | -158.3063  |
| log_s_Shewanella_putrefaciens | Stroke              | Weighted mode             | 13 | 0.9980 | 0.9558 | 1.0420 | 0.9276 | -0.0209 | 0.0167 | 0.2376 | 17.0992 | 0.1459 | -158.3063  |
| log_s_Slackia_exigua          | CardioEmbolicStroke | MR Egger                  | 7  | 1.3367 | 0.9338 | 1.9134 | 0.1737 | -0.0931 | 0.0803 | 0.2988 | 3.9329  | 0.6858 | -152.4011  |
| log_s_Slackia_exigua          | CardioEmbolicStroke | Weighted median           | 7  | 1.1440 | 0.9994 | 1.3094 | 0.0509 | -0.0931 | 0.0803 | 0.2988 | 3.9329  | 0.6858 | -152.4011  |
| log_s_Slackia_exigua          | CardioEmbolicStroke | Inverse variance weighted | 7  | 1.0915 | 0.9818 | 1.2134 | 0.1052 | -0.0931 | 0.0803 | 0.2988 | 3.9329  | 0.6858 | -152.4011  |
| log_s_Slackia_exigua          | CardioEmbolicStroke | Simple mode               | 7  | 1.1482 | 0.9313 | 1.4157 | 0.2434 | -0.0931 | 0.0803 | 0.2988 | 3.9329  | 0.6858 | -152.4011  |
| log_s_Slackia_exigua          | CardioEmbolicStroke | Weighted mode             | 7  | 1.1450 | 0.9553 | 1.3723 | 0.1931 | -0.0931 | 0.0803 | 0.2988 | 3.9329  | 0.6858 | -152.4011  |
| log_s_Slackia_exigua          | IschemicStroke      | MR Egger                  | 11 | 0.9972 | 0.9333 | 1.0655 | 0.9361 | 0.0002  | 0.0169 | 0.9898 | 13.9874 | 0.1228 | -73.2825   |
| log_s_Slackia_exigua          | IschemicStroke      | Weighted median           | 11 | 1.0065 | 0.9774 | 1.0365 | 0.6630 | 0.0002  | 0.0169 | 0.9898 | 13.9874 | 0.1228 | -73.2825   |
| log_s_Slackia_exigua          | IschemicStroke      | Inverse variance weighted | 11 | 0.9976 | 0.9740 | 1.0218 | 0.8459 | 0.0002  | 0.0169 | 0.9898 | 13.9874 | 0.1228 | -73.2825   |
| log_s_Slackia_exigua          | IschemicStroke      | Simple mode               | 11 | 0.9957 | 0.9448 | 1.0494 | 0.8754 | 0.0002  | 0.0169 | 0.9898 | 13.9874 | 0.1228 | -73.2825   |
| log_s_Slackia_exigua          | IschemicStroke      | Weighted mode             | 11 | 1.0030 | 0.9521 | 1.0567 | 0.9114 | 0.0002  | 0.0169 | 0.9898 | 13.9874 | 0.1228 | -73.2825   |
| log_s_Slackia_exigua          | LargeArteryStroke   | MR Egger                  | 11 | 0.9785 | 0.8105 | 1.1814 | 0.8265 | 0.0051  | 0.0484 | 0.9186 | 10.7652 | 0.2922 | -22.4245   |
| log_s_Slackia_exigua          | LargeArteryStroke   | Weighted median           | 11 | 0.9650 | 0.8789 | 1.0595 | 0.4548 | 0.0051  | 0.0484 | 0.9186 | 10.7652 | 0.2922 | -22.4245   |
| log_s_Slackia_exigua          | LargeArteryStroke   | Inverse variance weighted | 11 | 0.9877 | 0.9228 | 1.0572 | 0.7218 | 0.0051  | 0.0484 | 0.9186 | 10.7652 | 0.2922 | -22.4245   |
| log_s_Slackia_exigua          | LargeArteryStroke   | Simple mode               | 11 | 0.9541 | 0.8088 | 1.1256 | 0.5898 | 0.0051  | 0.0484 | 0.9186 | 10.7652 | 0.2922 | -22.4245   |
| log_s_Slackia_exigua          | LargeArteryStroke   | Weighted mode             | 11 | 0.9609 | 0.8296 | 1.1129 | 0.6059 | 0.0051  | 0.0484 | 0.9186 | 10.7652 | 0.2922 | -22.4245   |
| log_s_Slackia_exigua          | SmallVesselStroke   | MR Egger                  | 11 | 1.0204 | 0.9263 | 1.1240 | 0.6920 | -0.0121 | 0.0247 | 0.6350 | 5.4966  | 0.7890 | -64.7454   |
| log_s_Slackia_exigua          | SmallVesselStroke   | Weighted median           | 11 | 0.9932 | 0.9452 | 1.0435 | 0.7859 | -0.0121 | 0.0247 | 0.6350 | 5.4966  | 0.7890 | -64.7454   |
| log_s_Slackia_exigua          | SmallVesselStroke   | Inverse variance weighted | 11 | 0.9978 | 0.9619 | 1.0350 | 0.9043 | -0.0121 | 0.0247 | 0.6350 | 5.4966  | 0.7890 | -64.7454   |
| log_s_Slackia_exigua          | SmallVesselStroke   | Simple mode               | 11 | 0.9901 | 0.9146 | 1.0718 | 0.8109 | -0.0121 | 0.0247 | 0.6350 | 5.4966  | 0.7890 | -64.7454   |
| log_s_Slackia_exigua          | SmallVesselStroke   | Weighted mode             | 11 | 0.9912 | 0.9181 | 1.0701 | 0.8252 | -0.0121 | 0.0247 | 0.6350 | 5.4966  | 0.7890 | -64.7454   |
| log_s_Slackia_exigua          | Stroke              | MR Egger                  | 12 | 1.0062 | 0.9595 | 1.0551 | 0.8049 | -0.0001 | 0.0128 | 0.9912 | 14.8655 | 0.1370 | -75.8777   |
| log_s_Slackia_exigua          | Stroke              | Weighted median           | 12 | 1.0034 | 0.9804 | 1.0269 | 0.7772 | -0.0001 | 0.0128 | 0.9912 | 14.8655 | 0.1370 | -75.8777   |
| log_s_Slackia_exigua          | Stroke              | Inverse variance weighted | 12 | 1.0059 | 0.9871 | 1.0251 | 0.5402 | -0.0001 | 0.0128 | 0.9912 | 14.8655 | 0.1370 | -75.8777   |
| log_s_Slackia_exigua          | Stroke              | Simple mode               | 12 | 0.9973 | 0.9557 | 1.0408 | 0.9048 | -0.0001 | 0.0128 | 0.9912 | 14.8655 | 0.1370 | -75.8777   |
| log_s_Slackia_exigua          | Stroke              | Weighted mode             | 12 | 0.9965 | 0.9557 | 1.0389 | 0.8707 | -0.0001 | 0.0128 | 0.9912 | 14.8655 | 0.1370 | -75.8777   |
| log_s_Staphylococcus_aureus   | CardioEmbolicStroke | MR Egger                  | 4  | 0.7183 | 0.4122 | 1.2519 | 0.3634 | 0.1480  | 0.1143 | 0.3248 | 2.4229  | 0.4894 | 3665.5197  |
| log_s_Staphylococcus_aureus   | CardioEmbolicStroke | Weighted median           | 4  | 0.9998 | 0.8470 | 1.1801 | 0.9982 | 0.1480  | 0.1143 | 0.3248 | 2.4229  | 0.4894 | 3665.5197  |
| log_s_Staphylococcus_aureus   | CardioEmbolicStroke | Inverse variance weighted | 4  | 1.0256 | 0.8977 | 1.1718 | 0.7098 | 0.1480  | 0.1143 | 0.3248 | 2.4229  | 0.4894 | 3665.5197  |
| log_s_Staphylococcus_aureus   | CardioEmbolicStroke | Simple mode               | 4  | 0.9628 | 0.7591 | 1.2211 | 0.7749 | 0.1480  | 0.1143 | 0.3248 | 2.4229  | 0.4894 | 3665.5197  |
| log_s_Staphylococcus_aureus   | CardioEmbolicStroke | Weighted mode             | 4  | 0.9501 | 0.7656 | 1.1790 | 0.6736 | 0.1480  | 0.1143 | 0.3248 | 2.4229  | 0.4894 | 3665.5197  |
| log_s_Staphylococcus_aureus   | IschemicStroke      | MR Egger                  | 4  | 1.0090 | 0.8862 | 1.1489 | 0.9044 | -0.0166 | 0.0267 | 0.5977 | 0.7001  | 0.7046 | 16017.6635 |

|                                  |                     |                           |    |        |        |        |        |         |        |        |         |        |             |
|----------------------------------|---------------------|---------------------------|----|--------|--------|--------|--------|---------|--------|--------|---------|--------|-------------|
| log_s_Staphylococcus_aureus      | IschemicStroke      | Weighted median           | 4  | 0.9737 | 0.9382 | 1.0105 | 0.1595 | -0.0166 | 0.0267 | 0.5977 | 0.7001  | 0.7046 | 16017.6635  |
| log_s_Staphylococcus_aureus      | IschemicStroke      | Inverse variance weighted | 4  | 0.9695 | 0.9399 | 1.0000 | 0.0498 | -0.0166 | 0.0267 | 0.5977 | 0.7001  | 0.7046 | 16017.6635  |
| log_s_Staphylococcus_aureus      | IschemicStroke      | Simple mode               | 4  | 0.9767 | 0.9300 | 1.0259 | 0.4165 | -0.0166 | 0.0267 | 0.5977 | 0.7001  | 0.7046 | 16017.6635  |
| log_s_Staphylococcus_aureus      | IschemicStroke      | Weighted mode             | 4  | 0.9798 | 0.9304 | 1.0319 | 0.4964 | -0.0166 | 0.0267 | 0.5977 | 0.7001  | 0.7046 | 16017.6635  |
| log_s_Staphylococcus_aureus      | LargeArteryStroke   | MR Egger                  | 4  | 1.2776 | 0.8145 | 2.0041 | 0.3978 | -0.1517 | 0.0923 | 0.2419 | 5.3978  | 0.1449 | 2330.7444   |
| log_s_Staphylococcus_aureus      | LargeArteryStroke   | Weighted median           | 4  | 0.8953 | 0.7842 | 1.0220 | 0.1015 | -0.1517 | 0.0923 | 0.2419 | 5.3978  | 0.1449 | 2330.7444   |
| log_s_Staphylococcus_aureus      | LargeArteryStroke   | Inverse variance weighted | 4  | 0.8853 | 0.7745 | 1.0120 | 0.0742 | -0.1517 | 0.0923 | 0.2419 | 5.3978  | 0.1449 | 2330.7444   |
| log_s_Staphylococcus_aureus      | LargeArteryStroke   | Simple mode               | 4  | 0.9042 | 0.7378 | 1.1080 | 0.4030 | -0.1517 | 0.0923 | 0.2419 | 5.3978  | 0.1449 | 2330.7444   |
| log_s_Staphylococcus_aureus      | LargeArteryStroke   | Weighted mode             | 4  | 0.9106 | 0.7633 | 1.0863 | 0.3746 | -0.1517 | 0.0923 | 0.2419 | 5.3978  | 0.1449 | 2330.7444   |
| log_s_Staphylococcus_aureus      | SmallVesselStroke   | MR Egger                  | 4  | 1.0744 | 0.8375 | 1.3784 | 0.6292 | -0.0366 | 0.0512 | 0.5496 | 2.2952  | 0.3174 | 10273.4782  |
| log_s_Staphylococcus_aureus      | SmallVesselStroke   | Weighted median           | 4  | 1.0060 | 0.9399 | 1.0767 | 0.8629 | -0.0366 | 0.0512 | 0.5496 | 2.2952  | 0.3174 | 10273.4782  |
| log_s_Staphylococcus_aureus      | SmallVesselStroke   | Inverse variance weighted | 4  | 0.9839 | 0.9307 | 1.0401 | 0.5661 | -0.0366 | 0.0512 | 0.5496 | 2.2952  | 0.3174 | 10273.4782  |
| log_s_Staphylococcus_aureus      | SmallVesselStroke   | Simple mode               | 4  | 1.0144 | 0.9280 | 1.1089 | 0.7736 | -0.0366 | 0.0512 | 0.5496 | 2.2952  | 0.3174 | 10273.4782  |
| log_s_Staphylococcus_aureus      | SmallVesselStroke   | Weighted mode             | 4  | 1.0144 | 0.9337 | 1.1020 | 0.7575 | -0.0366 | 0.0512 | 0.5496 | 2.2952  | 0.3174 | 10273.4782  |
| log_s_Staphylococcus_aureus      | Stroke              | MR Egger                  | 5  | 1.0100 | 0.8936 | 1.1416 | 0.8835 | -0.0102 | 0.0251 | 0.7116 | 3.5798  | 0.3106 | 380954.0510 |
| log_s_Staphylococcus_aureus      | Stroke              | Weighted median           | 5  | 0.9847 | 0.9558 | 1.0145 | 0.3114 | -0.0102 | 0.0251 | 0.7116 | 3.5798  | 0.3106 | 380954.0510 |
| log_s_Staphylococcus_aureus      | Stroke              | Inverse variance weighted | 5  | 0.9853 | 0.9602 | 1.0112 | 0.2635 | -0.0102 | 0.0251 | 0.7116 | 3.5798  | 0.3106 | 380954.0510 |
| log_s_Staphylococcus_aureus      | Stroke              | Simple mode               | 5  | 0.9852 | 0.9486 | 1.0232 | 0.4839 | -0.0102 | 0.0251 | 0.7116 | 3.5798  | 0.3106 | 380954.0510 |
| log_s_Staphylococcus_aureus      | Stroke              | Weighted mode             | 5  | 0.9858 | 0.9554 | 1.0172 | 0.4226 | -0.0102 | 0.0251 | 0.7116 | 3.5798  | 0.3106 | 380954.0510 |
| log_s_Streptococcus_constellatus | CardioEmbolicStroke | MR Egger                  | 9  | 1.1730 | 0.6761 | 2.0350 | 0.5881 | -0.0882 | 0.1109 | 0.4522 | 8.0336  | 0.3296 | -344.9878   |
| log_s_Streptococcus_constellatus | CardioEmbolicStroke | Weighted median           | 9  | 0.9897 | 0.8579 | 1.1419 | 0.8875 | -0.0882 | 0.1109 | 0.4522 | 8.0336  | 0.3296 | -344.9878   |
| log_s_Streptococcus_constellatus | CardioEmbolicStroke | Inverse variance weighted | 9  | 0.9415 | 0.8514 | 1.0411 | 0.2402 | -0.0882 | 0.1109 | 0.4522 | 8.0336  | 0.3296 | -344.9878   |
| log_s_Streptococcus_constellatus | CardioEmbolicStroke | Simple mode               | 9  | 1.0143 | 0.8040 | 1.2798 | 0.9073 | -0.0882 | 0.1109 | 0.4522 | 8.0336  | 0.3296 | -344.9878   |
| log_s_Streptococcus_constellatus | CardioEmbolicStroke | Weighted mode             | 9  | 1.0328 | 0.8313 | 1.2831 | 0.7781 | -0.0882 | 0.1109 | 0.4522 | 8.0336  | 0.3296 | -344.9878   |
| log_s_Streptococcus_constellatus | IschemicStroke      | MR Egger                  | 10 | 0.9999 | 0.9006 | 1.1101 | 0.9984 | -0.0011 | 0.0214 | 0.9590 | 4.6704  | 0.7922 | -1371.4952  |
| log_s_Streptococcus_constellatus | IschemicStroke      | Weighted median           | 10 | 0.9929 | 0.9664 | 1.0201 | 0.6039 | -0.0011 | 0.0214 | 0.9590 | 4.6704  | 0.7922 | -1371.4952  |
| log_s_Streptococcus_constellatus | IschemicStroke      | Inverse variance weighted | 10 | 0.9971 | 0.9760 | 1.0187 | 0.7924 | -0.0011 | 0.0214 | 0.9590 | 4.6704  | 0.7922 | -1371.4952  |
| log_s_Streptococcus_constellatus | IschemicStroke      | Simple mode               | 10 | 0.9858 | 0.9441 | 1.0295 | 0.5346 | -0.0011 | 0.0214 | 0.9590 | 4.6704  | 0.7922 | -1371.4952  |
| log_s_Streptococcus_constellatus | IschemicStroke      | Weighted mode             | 10 | 0.9868 | 0.9410 | 1.0347 | 0.5949 | -0.0011 | 0.0214 | 0.9590 | 4.6704  | 0.7922 | -1371.4952  |
| log_s_Streptococcus_constellatus | LargeArteryStroke   | MR Egger                  | 10 | 1.3098 | 0.9342 | 1.8363 | 0.1561 | -0.1052 | 0.0692 | 0.1670 | 10.2997 | 0.3268 | -192.1902   |
| log_s_Streptococcus_constellatus | LargeArteryStroke   | Weighted median           | 10 | 1.0111 | 0.9211 | 1.1099 | 0.8165 | -0.1052 | 0.0692 | 0.1670 | 10.2997 | 0.3268 | -192.1902   |
| log_s_Streptococcus_constellatus | LargeArteryStroke   | Inverse variance weighted | 10 | 1.0135 | 0.9409 | 1.0917 | 0.7238 | -0.1052 | 0.0692 | 0.1670 | 10.2997 | 0.3268 | -192.1902   |
| log_s_Streptococcus_constellatus | LargeArteryStroke   | Simple mode               | 10 | 1.0283 | 0.8667 | 1.2201 | 0.7563 | -0.1052 | 0.0692 | 0.1670 | 10.2997 | 0.3268 | -192.1902   |
| log_s_Streptococcus_constellatus | LargeArteryStroke   | Weighted mode             | 10 | 1.0468 | 0.8920 | 1.2285 | 0.5890 | -0.1052 | 0.0692 | 0.1670 | 10.2997 | 0.3268 | -192.1902   |
| log_s_Streptococcus_constellatus | SmallVesselStroke   | MR Egger                  | 10 | 0.8784 | 0.7274 | 1.0607 | 0.2148 | 0.0449  | 0.0386 | 0.2779 | 5.7933  | 0.7604 | -577.2940   |
| log_s_Streptococcus_constellatus | SmallVesselStroke   | Weighted median           | 10 | 0.9872 | 0.9386 | 1.0383 | 0.6165 | 0.0449  | 0.0386 | 0.2779 | 5.7933  | 0.7604 | -577.2940   |
| log_s_Streptococcus_constellatus | SmallVesselStroke   | Inverse variance weighted | 10 | 0.9802 | 0.9429 | 1.0189 | 0.3110 | 0.0449  | 0.0386 | 0.2779 | 5.7933  | 0.7604 | -577.2940   |
| log_s_Streptococcus_constellatus | SmallVesselStroke   | Simple mode               | 10 | 0.9924 | 0.9158 | 1.0753 | 0.8559 | 0.0449  | 0.0386 | 0.2779 | 5.7933  | 0.7604 | -577.2940   |
| log_s_Streptococcus_constellatus | SmallVesselStroke   | Weighted mode             | 10 | 0.9930 | 0.9196 | 1.0723 | 0.8617 | 0.0449  | 0.0386 | 0.2779 | 5.7933  | 0.7604 | -577.2940   |
| log_s_Streptococcus_constellatus | Stroke              | MR Egger                  | 10 | 0.9900 | 0.9078 | 1.0798 | 0.8268 | 0.0039  | 0.0179 | 0.8327 | 6.3582  | 0.6072 | -1772.7376  |
| log_s_Streptococcus_constellatus | Stroke              | Weighted median           | 10 | 0.9986 | 0.9741 | 1.0237 | 0.9133 | 0.0039  | 0.0179 | 0.8327 | 6.3582  | 0.6072 | -1772.7376  |
| log_s_Streptococcus_constellatus | Stroke              | Inverse variance weighted | 10 | 0.9994 | 0.9816 | 1.0176 | 0.9518 | 0.0039  | 0.0179 | 0.8327 | 6.3582  | 0.6072 | -1772.7376  |
| log_s_Streptococcus_constellatus | Stroke              | Simple mode               | 10 | 0.9998 | 0.9608 | 1.0405 | 0.9939 | 0.0039  | 0.0179 | 0.8327 | 6.3582  | 0.6072 | -1772.7376  |
| log_s_Streptococcus_constellatus | Stroke              | Weighted mode             | 10 | 0.9970 | 0.9596 | 1.0359 | 0.8802 | 0.0039  | 0.0179 | 0.8327 | 6.3582  | 0.6072 | -1772.7376  |
| log_s_Streptococcus_cristatus    | CardioEmbolicStroke | MR Egger                  | 6  | 0.8403 | 0.6188 | 1.1412 | 0.3276 | 0.0920  | 0.0787 | 0.3073 | 2.4563  | 0.7831 | -316.1466   |
| log_s_Streptococcus_cristatus    | CardioEmbolicStroke | Weighted median           | 6  | 0.9990 | 0.8783 | 1.1363 | 0.9877 | 0.0920  | 0.0787 | 0.3073 | 2.4563  | 0.7831 | -316.1466   |
| log_s_Streptococcus_cristatus    | CardioEmbolicStroke | Inverse variance weighted | 6  | 0.9974 | 0.8978 | 1.1081 | 0.9615 | 0.0920  | 0.0787 | 0.3073 | 2.4563  | 0.7831 | -316.1466   |
| log_s_Streptococcus_cristatus    | CardioEmbolicStroke | Simple mode               | 6  | 1.0693 | 0.8790 | 1.3007 | 0.5324 | 0.0920  | 0.0787 | 0.3073 | 2.4563  | 0.7831 | -316.1466   |
| log_s_Streptococcus_cristatus    | CardioEmbolicStroke | Weighted mode             | 6  | 0.9308 | 0.7813 | 1.1089 | 0.4587 | 0.0920  | 0.0787 | 0.3073 | 2.4563  | 0.7831 | -316.1466   |
| log_s_Streptococcus_cristatus    | IschemicStroke      | MR Egger                  | 7  | 0.9606 | 0.9011 | 1.0241 | 0.2734 | 0.0218  | 0.0172 | 0.2609 | 5.5416  | 0.4764 | -606.1993   |
| log_s_Streptococcus_cristatus    | IschemicStroke      | Weighted median           | 7  | 0.9879 | 0.9569 | 1.0199 | 0.4546 | 0.0218  | 0.0172 | 0.2609 | 5.5416  | 0.4764 | -606.1993   |
| log_s_Streptococcus_cristatus    | IschemicStroke      | Inverse variance weighted | 7  | 0.9985 | 0.9761 | 1.0214 | 0.8987 | 0.0218  | 0.0172 | 0.2609 | 5.5416  | 0.4764 | -606.1993   |
| log_s_Streptococcus_cristatus    | IschemicStroke      | Simple mode               | 7  | 0.9862 | 0.9389 | 1.0358 | 0.5981 | 0.0218  | 0.0172 | 0.2609 | 5.5416  | 0.4764 | -606.1993   |

|                                    |                     |                           |    |        |        |        |        |         |        |        |         |        |           |
|------------------------------------|---------------------|---------------------------|----|--------|--------|--------|--------|---------|--------|--------|---------|--------|-----------|
| log_s_Streptococcus_cristatus      | IschemicStroke      | Weighted mode             | 7  | 0.9817 | 0.9416 | 1.0234 | 0.4174 | 0.0218  | 0.0172 | 0.2609 | 5.5416  | 0.4764 | -606.1993 |
| log_s_Streptococcus_cristatus      | LargeArteryStroke   | MR Egger                  | 7  | 1.0453 | 0.8021 | 1.3622 | 0.7563 | 0.0098  | 0.0706 | 0.8949 | 7.9368  | 0.1598 | -94.6191  |
| log_s_Streptococcus_cristatus      | LargeArteryStroke   | Weighted median           | 7  | 1.0496 | 0.9446 | 1.1662 | 0.3681 | 0.0098  | 0.0706 | 0.8949 | 7.9368  | 0.1598 | -94.6191  |
| log_s_Streptococcus_cristatus      | LargeArteryStroke   | Inverse variance weighted | 7  | 1.0638 | 0.9768 | 1.1586 | 0.1554 | 0.0098  | 0.0706 | 0.8949 | 7.9368  | 0.1598 | -94.6191  |
| log_s_Streptococcus_cristatus      | LargeArteryStroke   | Simple mode               | 7  | 1.1705 | 0.9737 | 1.4071 | 0.1446 | 0.0098  | 0.0706 | 0.8949 | 7.9368  | 0.1598 | -94.6191  |
| log_s_Streptococcus_cristatus      | LargeArteryStroke   | Weighted mode             | 7  | 1.0125 | 0.8893 | 1.1527 | 0.8575 | 0.0098  | 0.0706 | 0.8949 | 7.9368  | 0.1598 | -94.6191  |
| log_s_Streptococcus_cristatus      | SmallVesselStroke   | MR Egger                  | 7  | 0.9154 | 0.8012 | 1.0459 | 0.2503 | 0.0579  | 0.0358 | 0.1664 | 10.0889 | 0.1210 | -249.7968 |
| log_s_Streptococcus_cristatus      | SmallVesselStroke   | Weighted median           | 7  | 0.9802 | 0.9247 | 1.0391 | 0.5020 | 0.0579  | 0.0358 | 0.1664 | 10.0889 | 0.1210 | -249.7968 |
| log_s_Streptococcus_cristatus      | SmallVesselStroke   | Inverse variance weighted | 7  | 1.0147 | 0.9622 | 1.0700 | 0.5913 | 0.0579  | 0.0358 | 0.1664 | 10.0889 | 0.1210 | -249.7968 |
| log_s_Streptococcus_cristatus      | SmallVesselStroke   | Simple mode               | 7  | 0.9847 | 0.8906 | 1.0888 | 0.7739 | 0.0579  | 0.0358 | 0.1664 | 10.0889 | 0.1210 | -249.7968 |
| log_s_Streptococcus_cristatus      | SmallVesselStroke   | Weighted mode             | 7  | 0.9695 | 0.9023 | 1.0417 | 0.4298 | 0.0579  | 0.0358 | 0.1664 | 10.0889 | 0.1210 | -249.7968 |
| log_s_Streptococcus_cristatus      | Stroke              | MR Egger                  | 8  | 0.9810 | 0.9207 | 1.0452 | 0.5749 | 0.0108  | 0.0168 | 0.5447 | 7.6122  | 0.2679 | -461.5509 |
| log_s_Streptococcus_cristatus      | Stroke              | Weighted median           | 8  | 0.9881 | 0.9626 | 1.0144 | 0.3715 | 0.0108  | 0.0168 | 0.5447 | 7.6122  | 0.2679 | -461.5509 |
| log_s_Streptococcus_cristatus      | Stroke              | Inverse variance weighted | 8  | 1.0003 | 0.9797 | 1.0214 | 0.9759 | 0.0108  | 0.0168 | 0.5447 | 7.6122  | 0.2679 | -461.5509 |
| log_s_Streptococcus_cristatus      | Stroke              | Simple mode               | 8  | 0.9860 | 0.9447 | 1.0291 | 0.5396 | 0.0108  | 0.0168 | 0.5447 | 7.6122  | 0.2679 | -461.5509 |
| log_s_Streptococcus_cristatus      | Stroke              | Weighted mode             | 8  | 0.9819 | 0.9491 | 1.0158 | 0.3272 | 0.0108  | 0.0168 | 0.5447 | 7.6122  | 0.2679 | -461.5509 |
| log_s_Streptococcus_peroris        | CardioEmbolicStroke | MR Egger                  | 11 | 0.9929 | 0.6121 | 1.6105 | 0.9776 | 0.0090  | 0.1000 | 0.9304 | 7.2098  | 0.6153 | -182.3592 |
| log_s_Streptococcus_peroris        | CardioEmbolicStroke | Weighted median           | 11 | 0.9920 | 0.8874 | 1.1089 | 0.8871 | 0.0090  | 0.1000 | 0.9304 | 7.2098  | 0.6153 | -182.3592 |
| log_s_Streptococcus_peroris        | CardioEmbolicStroke | Inverse variance weighted | 11 | 1.0148 | 0.9333 | 1.1034 | 0.7309 | 0.0090  | 0.1000 | 0.9304 | 7.2098  | 0.6153 | -182.3592 |
| log_s_Streptococcus_peroris        | CardioEmbolicStroke | Simple mode               | 11 | 0.9614 | 0.7993 | 1.1564 | 0.6848 | 0.0090  | 0.1000 | 0.9304 | 7.2098  | 0.6153 | -182.3592 |
| log_s_Streptococcus_peroris        | CardioEmbolicStroke | Weighted mode             | 11 | 0.9673 | 0.8161 | 1.1466 | 0.7098 | 0.0090  | 0.1000 | 0.9304 | 7.2098  | 0.6153 | -182.3592 |
| log_s_Streptococcus_peroris        | IschemicStroke      | MR Egger                  | 12 | 0.9448 | 0.8671 | 1.0296 | 0.2244 | 0.0130  | 0.0183 | 0.4947 | 11.8551 | 0.2949 | -125.4960 |
| log_s_Streptococcus_peroris        | IschemicStroke      | Weighted median           | 12 | 0.9799 | 0.9557 | 1.0048 | 0.1123 | 0.0130  | 0.0183 | 0.4947 | 11.8551 | 0.2949 | -125.4960 |
| log_s_Streptococcus_peroris        | IschemicStroke      | Inverse variance weighted | 12 | 0.9738 | 0.9547 | 0.9933 | 0.0086 | 0.0130  | 0.0183 | 0.4947 | 11.8551 | 0.2949 | -125.4960 |
| log_s_Streptococcus_peroris        | IschemicStroke      | Simple mode               | 12 | 0.9899 | 0.9475 | 1.0342 | 0.6597 | 0.0130  | 0.0183 | 0.4947 | 11.8551 | 0.2949 | -125.4960 |
| log_s_Streptococcus_peroris        | IschemicStroke      | Weighted mode             | 12 | 0.9904 | 0.9512 | 1.0313 | 0.6507 | 0.0130  | 0.0183 | 0.4947 | 11.8551 | 0.2949 | -125.4960 |
| log_s_Streptococcus_peroris        | LargeArteryStroke   | MR Egger                  | 12 | 0.8302 | 0.6461 | 1.0668 | 0.1765 | 0.0779  | 0.0537 | 0.1774 | 5.9753  | 0.8750 | -62.5594  |
| log_s_Streptococcus_peroris        | LargeArteryStroke   | Weighted median           | 12 | 1.0156 | 0.9355 | 1.1026 | 0.7114 | 0.0779  | 0.0537 | 0.1774 | 5.9753  | 0.8750 | -62.5594  |
| log_s_Streptococcus_peroris        | LargeArteryStroke   | Inverse variance weighted | 12 | 0.9942 | 0.9360 | 1.0559 | 0.8493 | 0.0779  | 0.0537 | 0.1774 | 5.9753  | 0.8750 | -62.5594  |
| log_s_Streptococcus_peroris        | LargeArteryStroke   | Simple mode               | 12 | 1.0398 | 0.9194 | 1.1760 | 0.5469 | 0.0779  | 0.0537 | 0.1774 | 5.9753  | 0.8750 | -62.5594  |
| log_s_Streptococcus_peroris        | LargeArteryStroke   | Weighted mode             | 12 | 1.0366 | 0.9197 | 1.1684 | 0.5677 | 0.0779  | 0.0537 | 0.1774 | 5.9753  | 0.8750 | -62.5594  |
| log_s_Streptococcus_peroris        | SmallVesselStroke   | MR Egger                  | 12 | 1.0089 | 0.8781 | 1.1593 | 0.9025 | -0.0170 | 0.0297 | 0.5808 | 5.5479  | 0.8517 | -200.1287 |
| log_s_Streptococcus_peroris        | SmallVesselStroke   | Weighted median           | 12 | 0.9768 | 0.9358 | 1.0196 | 0.2830 | -0.0170 | 0.0297 | 0.5808 | 5.5479  | 0.8517 | -200.1287 |
| log_s_Streptococcus_peroris        | SmallVesselStroke   | Inverse variance weighted | 12 | 0.9701 | 0.9382 | 1.0031 | 0.0756 | -0.0170 | 0.0297 | 0.5808 | 5.5479  | 0.8517 | -200.1287 |
| log_s_Streptococcus_peroris        | SmallVesselStroke   | Simple mode               | 12 | 0.9803 | 0.9173 | 1.0476 | 0.5689 | -0.0170 | 0.0297 | 0.5808 | 5.5479  | 0.8517 | -200.1287 |
| log_s_Streptococcus_peroris        | SmallVesselStroke   | Weighted mode             | 12 | 0.9809 | 0.9183 | 1.0477 | 0.5772 | -0.0170 | 0.0297 | 0.5808 | 5.5479  | 0.8517 | -200.1287 |
| log_s_Streptococcus_peroris        | Stroke              | MR Egger                  | 12 | 0.9638 | 0.9044 | 1.0271 | 0.2830 | 0.0102  | 0.0137 | 0.4719 | 8.3525  | 0.5945 | -232.4039 |
| log_s_Streptococcus_peroris        | Stroke              | Weighted median           | 12 | 0.9846 | 0.9643 | 1.0053 | 0.1431 | 0.0102  | 0.0137 | 0.4719 | 8.3525  | 0.5945 | -232.4039 |
| log_s_Streptococcus_peroris        | Stroke              | Inverse variance weighted | 12 | 0.9868 | 0.9713 | 1.0025 | 0.0988 | 0.0102  | 0.0137 | 0.4719 | 8.3525  | 0.5945 | -232.4039 |
| log_s_Streptococcus_peroris        | Stroke              | Simple mode               | 12 | 0.9851 | 0.9505 | 1.0209 | 0.4278 | 0.0102  | 0.0137 | 0.4719 | 8.3525  | 0.5945 | -232.4039 |
| log_s_Streptococcus_peroris        | Stroke              | Weighted mode             | 12 | 0.9861 | 0.9545 | 1.0188 | 0.4192 | 0.0102  | 0.0137 | 0.4719 | 8.3525  | 0.5945 | -232.4039 |
| log_s_Streptococcus_pseudopneumoni | CardioEmbolicStroke | MR Egger                  | 3  | 0.5836 | 0.0465 | 7.3209 | 0.7483 | 0.2321  | 0.5034 | 0.7250 | 1.0456  | 0.3065 | 316.1559  |
| log_s_Streptococcus_pseudopneumoni | CardioEmbolicStroke | Weighted median           | 3  | 1.0790 | 0.8745 | 1.3313 | 0.4783 | 0.2321  | 0.5034 | 0.7250 | 1.0456  | 0.3065 | 316.1559  |
| log_s_Streptococcus_pseudopneumoni | CardioEmbolicStroke | Inverse variance weighted | 3  | 1.0564 | 0.8895 | 1.2546 | 0.5315 | 0.2321  | 0.5034 | 0.7250 | 1.0456  | 0.3065 | 316.1559  |
| log_s_Streptococcus_pseudopneumoni | CardioEmbolicStroke | Simple mode               | 3  | 1.0917 | 0.8369 | 1.4240 | 0.5840 | 0.2321  | 0.5034 | 0.7250 | 1.0456  | 0.3065 | 316.1559  |
| log_s_Streptococcus_pseudopneumoni | CardioEmbolicStroke | Weighted mode             | 3  | 1.1113 | 0.8616 | 1.4333 | 0.5019 | 0.2321  | 0.5034 | 0.7250 | 1.0456  | 0.3065 | 316.1559  |
| log_s_Streptococcus_pseudopneumoni | IschemicStroke      | MR Egger                  | 6  | 1.0344 | 0.9567 | 1.1184 | 0.4437 | -0.0256 | 0.0194 | 0.2584 | 4.2169  | 0.5186 | -546.6591 |
| log_s_Streptococcus_pseudopneumoni | IschemicStroke      | Weighted median           | 6  | 0.9792 | 0.9443 | 1.0154 | 0.2564 | -0.0256 | 0.0194 | 0.2584 | 4.2169  | 0.5186 | -546.6591 |
| log_s_Streptococcus_pseudopneumoni | IschemicStroke      | Inverse variance weighted | 6  | 0.9851 | 0.9575 | 1.0135 | 0.3001 | -0.0256 | 0.0194 | 0.2584 | 4.2169  | 0.5186 | -546.6591 |
| log_s_Streptococcus_pseudopneumoni | IschemicStroke      | Simple mode               | 6  | 0.9796 | 0.9238 | 1.0388 | 0.5215 | -0.0256 | 0.0194 | 0.2584 | 4.2169  | 0.5186 | -546.6591 |
| log_s_Streptococcus_pseudopneumoni | IschemicStroke      | Weighted mode             | 6  | 0.9785 | 0.9186 | 1.0423 | 0.5295 | -0.0256 | 0.0194 | 0.2584 | 4.2169  | 0.5186 | -546.6591 |
| log_s_Streptococcus_pseudopneumoni | LargeArteryStroke   | MR Egger                  | 5  | 1.1190 | 0.8040 | 1.5575 | 0.5527 | -0.0961 | 0.0822 | 0.3272 | 7.4027  | 0.1161 | -165.5113 |
| log_s_Streptococcus_pseudopneumoni | LargeArteryStroke   | Weighted median           | 5  | 1.0037 | 0.8709 | 1.1567 | 0.9595 | -0.0961 | 0.0822 | 0.3272 | 7.4027  | 0.1161 | -165.5113 |

|                                                     |                           |   |        |        |        |        |         |        |        |         |        |            |
|-----------------------------------------------------|---------------------------|---|--------|--------|--------|--------|---------|--------|--------|---------|--------|------------|
| log_s_Streptococcus_pseudopneumoniLargeArteryStroke | Inverse variance weighted | 5 | 0.9325 | 0.8181 | 1.0629 | 0.2954 | -0.0961 | 0.0822 | 0.3272 | 7.4027  | 0.1161 | -165.5113  |
| log_s_Streptococcus_pseudopneumoniLargeArteryStroke | Simple mode               | 5 | 1.0414 | 0.8364 | 1.2968 | 0.7350 | -0.0961 | 0.0822 | 0.3272 | 7.4027  | 0.1161 | -165.5113  |
| log_s_Streptococcus_pseudopneumoniLargeArteryStroke | Weighted mode             | 5 | 1.0429 | 0.8460 | 1.2855 | 0.7142 | -0.0961 | 0.0822 | 0.3272 | 7.4027  | 0.1161 | -165.5113  |
| log_s_Streptococcus_pseudopneumoniSmallVesselStroke | MR Egger                  | 5 | 1.0495 | 0.8762 | 1.2571 | 0.6360 | -0.0437 | 0.0448 | 0.4020 | 6.4624  | 0.1672 | -320.1452  |
| log_s_Streptococcus_pseudopneumoniSmallVesselStroke | Weighted median           | 5 | 0.9658 | 0.8916 | 1.0462 | 0.3935 | -0.0437 | 0.0448 | 0.4020 | 6.4624  | 0.1672 | -320.1452  |
| log_s_Streptococcus_pseudopneumoniSmallVesselStroke | Inverse variance weighted | 5 | 0.9659 | 0.9025 | 1.0339 | 0.3175 | -0.0437 | 0.0448 | 0.4020 | 6.4624  | 0.1672 | -320.1452  |
| log_s_Streptococcus_pseudopneumoniSmallVesselStroke | Simple mode               | 5 | 0.9482 | 0.8332 | 1.0791 | 0.4653 | -0.0437 | 0.0448 | 0.4020 | 6.4624  | 0.1672 | -320.1452  |
| log_s_Streptococcus_pseudopneumoniSmallVesselStroke | Weighted mode             | 5 | 1.0215 | 0.8991 | 1.1606 | 0.7605 | -0.0437 | 0.0448 | 0.4020 | 6.4624  | 0.1672 | -320.1452  |
| log_s_Streptococcus_pseudopneumoniStroke            | MR Egger                  | 6 | 1.0335 | 0.9669 | 1.1047 | 0.3866 | -0.0258 | 0.0164 | 0.1919 | 5.3781  | 0.3715 | -520.3823  |
| log_s_Streptococcus_pseudopneumoniStroke            | Weighted median           | 6 | 0.9792 | 0.9499 | 1.0095 | 0.1761 | -0.0258 | 0.0164 | 0.1919 | 5.3781  | 0.3715 | -520.3823  |
| log_s_Streptococcus_pseudopneumoniStroke            | Inverse variance weighted | 6 | 0.9833 | 0.9595 | 1.0077 | 0.1776 | -0.0258 | 0.0164 | 0.1919 | 5.3781  | 0.3715 | -520.3823  |
| log_s_Streptococcus_pseudopneumoniStroke            | Simple mode               | 6 | 0.9791 | 0.9364 | 1.0237 | 0.3958 | -0.0258 | 0.0164 | 0.1919 | 5.3781  | 0.3715 | -520.3823  |
| log_s_Streptococcus_pseudopneumoniStroke            | Weighted mode             | 6 | 0.9793 | 0.9317 | 1.0294 | 0.4487 | -0.0258 | 0.0164 | 0.1919 | 5.3781  | 0.3715 | -520.3823  |
| log_s_Succinatimonas_hippei_CardioEmbolicStroke     | MR Egger                  | 9 | 1.2256 | 0.6554 | 2.2916 | 0.5444 | -0.0944 | 0.1291 | 0.4883 | 10.3351 | 0.1704 | -230.7455  |
| log_s_Succinatimonas_hippei_CardioEmbolicStroke     | Weighted median           | 9 | 0.9689 | 0.8518 | 1.1020 | 0.6302 | -0.0944 | 0.1291 | 0.4883 | 10.3351 | 0.1704 | -230.7455  |
| log_s_Succinatimonas_hippei_CardioEmbolicStroke     | Inverse variance weighted | 9 | 0.9742 | 0.8715 | 1.0889 | 0.6448 | -0.0944 | 0.1291 | 0.4883 | 10.3351 | 0.1704 | -230.7455  |
| log_s_Succinatimonas_hippei_CardioEmbolicStroke     | Simple mode               | 9 | 1.0044 | 0.8221 | 1.2272 | 0.9666 | -0.0944 | 0.1291 | 0.4883 | 10.3351 | 0.1704 | -230.7455  |
| log_s_Succinatimonas_hippei_CardioEmbolicStroke     | Weighted mode             | 9 | 1.0020 | 0.8372 | 1.1994 | 0.9828 | -0.0944 | 0.1291 | 0.4883 | 10.3351 | 0.1704 | -230.7455  |
| log_s_Succinatimonas_hippei_IschemicStroke          | MR Egger                  | 9 | 1.1032 | 0.9802 | 1.2415 | 0.1474 | -0.0371 | 0.0244 | 0.1718 | 5.5739  | 0.6948 | -2248.0052 |
| log_s_Succinatimonas_hippei_IschemicStroke          | Weighted median           | 9 | 1.0145 | 0.9850 | 1.0449 | 0.3398 | -0.0371 | 0.0244 | 0.1718 | 5.5739  | 0.6948 | -2248.0052 |
| log_s_Succinatimonas_hippei_IschemicStroke          | Inverse variance weighted | 9 | 1.0080 | 0.9864 | 1.0301 | 0.4707 | -0.0371 | 0.0244 | 0.1718 | 5.5739  | 0.6948 | -2248.0052 |
| log_s_Succinatimonas_hippei_IschemicStroke          | Simple mode               | 9 | 1.0181 | 0.9717 | 1.0667 | 0.4729 | -0.0371 | 0.0244 | 0.1718 | 5.5739  | 0.6948 | -2248.0052 |
| log_s_Succinatimonas_hippei_IschemicStroke          | Weighted mode             | 9 | 1.0191 | 0.9732 | 1.0672 | 0.4440 | -0.0371 | 0.0244 | 0.1718 | 5.5739  | 0.6948 | -2248.0052 |
| log_s_Succinatimonas_hippei_LargeArteryStroke       | MR Egger                  | 9 | 1.3046 | 0.8350 | 2.0384 | 0.2811 | -0.1087 | 0.0921 | 0.2762 | 11.4106 | 0.1795 | -412.6927  |
| log_s_Succinatimonas_hippei_LargeArteryStroke       | Weighted median           | 9 | 0.9835 | 0.8904 | 1.0864 | 0.7438 | -0.1087 | 0.0921 | 0.2762 | 11.4106 | 0.1795 | -412.6927  |
| log_s_Succinatimonas_hippei_LargeArteryStroke       | Inverse variance weighted | 9 | 1.0016 | 0.9210 | 1.0892 | 0.9700 | -0.1087 | 0.0921 | 0.2762 | 11.4106 | 0.1795 | -412.6927  |
| log_s_Succinatimonas_hippei_LargeArteryStroke       | Simple mode               | 9 | 0.9214 | 0.7522 | 1.1287 | 0.4519 | -0.1087 | 0.0921 | 0.2762 | 11.4106 | 0.1795 | -412.6927  |
| log_s_Succinatimonas_hippei_LargeArteryStroke       | Weighted mode             | 9 | 0.9229 | 0.7636 | 1.1154 | 0.4305 | -0.1087 | 0.0921 | 0.2762 | 11.4106 | 0.1795 | -412.6927  |
| log_s_Succinatimonas_hippei_SmallVesselStroke       | MR Egger                  | 9 | 1.1009 | 0.8893 | 1.3630 | 0.4066 | -0.0430 | 0.0440 | 0.3614 | 6.5925  | 0.5812 | -1421.0302 |
| log_s_Succinatimonas_hippei_SmallVesselStroke       | Weighted median           | 9 | 0.9930 | 0.9445 | 1.0439 | 0.7827 | -0.0430 | 0.0440 | 0.3614 | 6.5925  | 0.5812 | -1421.0302 |
| log_s_Succinatimonas_hippei_SmallVesselStroke       | Inverse variance weighted | 9 | 0.9916 | 0.9536 | 1.0312 | 0.6743 | -0.0430 | 0.0440 | 0.3614 | 6.5925  | 0.5812 | -1421.0302 |
| log_s_Succinatimonas_hippei_SmallVesselStroke       | Simple mode               | 9 | 0.9986 | 0.9208 | 1.0829 | 0.9735 | -0.0430 | 0.0440 | 0.3614 | 6.5925  | 0.5812 | -1421.0302 |
| log_s_Succinatimonas_hippei_SmallVesselStroke       | Weighted mode             | 9 | 1.0071 | 0.9309 | 1.0896 | 0.8639 | -0.0430 | 0.0440 | 0.3614 | 6.5925  | 0.5812 | -1421.0302 |
| log_s_Succinatimonas_hippei_Stroke                  | MR Egger                  | 9 | 1.0529 | 0.9507 | 1.1661 | 0.3555 | -0.0190 | 0.0210 | 0.3965 | 6.1685  | 0.5202 | -2520.7184 |
| log_s_Succinatimonas_hippei_Stroke                  | Weighted median           | 9 | 1.0093 | 0.9835 | 1.0357 | 0.4831 | -0.0190 | 0.0210 | 0.3965 | 6.1685  | 0.5202 | -2520.7184 |
| log_s_Succinatimonas_hippei_Stroke                  | Inverse variance weighted | 9 | 1.0053 | 0.9868 | 1.0242 | 0.5779 | -0.0190 | 0.0210 | 0.3965 | 6.1685  | 0.5202 | -2520.7184 |
| log_s_Succinatimonas_hippei_Stroke                  | Simple mode               | 9 | 1.0095 | 0.9701 | 1.0506 | 0.6538 | -0.0190 | 0.0210 | 0.3965 | 6.1685  | 0.5202 | -2520.7184 |
| log_s_Succinatimonas_hippei_Stroke                  | Weighted mode             | 9 | 1.0109 | 0.9722 | 1.0510 | 0.6015 | -0.0190 | 0.0210 | 0.3965 | 6.1685  | 0.5202 | -2520.7184 |
| log_s_Turicibacter_sanguinis_CardioEmbolicStroke    | MR Egger                  | 7 | 0.9778 | 0.5648 | 1.6927 | 0.9392 | 0.0005  | 0.1242 | 0.9970 | 3.7954  | 0.5792 | -629.2253  |
| log_s_Turicibacter_sanguinis_CardioEmbolicStroke    | Weighted median           | 7 | 1.0105 | 0.8799 | 1.1604 | 0.8827 | 0.0005  | 0.1242 | 0.9970 | 3.7954  | 0.5792 | -629.2253  |
| log_s_Turicibacter_sanguinis_CardioEmbolicStroke    | Inverse variance weighted | 7 | 0.9789 | 0.8810 | 1.0876 | 0.6909 | 0.0005  | 0.1242 | 0.9970 | 3.7954  | 0.5792 | -629.2253  |
| log_s_Turicibacter_sanguinis_CardioEmbolicStroke    | Simple mode               | 7 | 1.0485 | 0.8516 | 1.2908 | 0.6710 | 0.0005  | 0.1242 | 0.9970 | 3.7954  | 0.5792 | -629.2253  |
| log_s_Turicibacter_sanguinis_CardioEmbolicStroke    | Weighted mode             | 7 | 1.0528 | 0.8483 | 1.3066 | 0.6572 | 0.0005  | 0.1242 | 0.9970 | 3.7954  | 0.5792 | -629.2253  |
| log_s_Turicibacter_sanguinis_IschemicStroke         | MR Egger                  | 8 | 1.0045 | 0.9404 | 1.0730 | 0.8981 | 0.0039  | 0.0164 | 0.8207 | 2.4759  | 0.8712 | -626.5936  |
| log_s_Turicibacter_sanguinis_IschemicStroke         | Weighted median           | 8 | 1.0178 | 0.9895 | 1.0468 | 0.2199 | 0.0039  | 0.0164 | 0.8207 | 2.4759  | 0.8712 | -626.5936  |
| log_s_Turicibacter_sanguinis_IschemicStroke         | Inverse variance weighted | 8 | 1.0121 | 0.9902 | 1.0344 | 0.2806 | 0.0039  | 0.0164 | 0.8207 | 2.4759  | 0.8712 | -626.5936  |
| log_s_Turicibacter_sanguinis_IschemicStroke         | Simple mode               | 8 | 1.0244 | 0.9836 | 1.0670 | 0.2830 | 0.0039  | 0.0164 | 0.8207 | 2.4759  | 0.8712 | -626.5936  |
| log_s_Turicibacter_sanguinis_IschemicStroke         | Weighted mode             | 8 | 1.0237 | 0.9814 | 1.0679 | 0.3126 | 0.0039  | 0.0164 | 0.8207 | 2.4759  | 0.8712 | -626.5936  |
| log_s_Turicibacter_sanguinis_LargeArteryStroke      | MR Egger                  | 8 | 0.9948 | 0.7213 | 1.3719 | 0.9755 | 0.0349  | 0.0803 | 0.6790 | 14.1736 | 0.0278 | -68.5502   |
| log_s_Turicibacter_sanguinis_LargeArteryStroke      | Weighted median           | 8 | 0.9924 | 0.8958 | 1.0994 | 0.8835 | 0.0349  | 0.0803 | 0.6790 | 14.1736 | 0.0278 | -68.5502   |
| log_s_Turicibacter_sanguinis_LargeArteryStroke      | Inverse variance weighted | 8 | 1.0639 | 0.9613 | 1.1774 | 0.2312 | 0.0349  | 0.0803 | 0.6790 | 14.1736 | 0.0278 | -68.5502   |
| log_s_Turicibacter_sanguinis_LargeArteryStroke      | Simple mode               | 8 | 0.9640 | 0.8337 | 1.1146 | 0.6356 | 0.0349  | 0.0803 | 0.6790 | 14.1736 | 0.0278 | -68.5502   |
| log_s_Turicibacter_sanguinis_LargeArteryStroke      | Weighted mode             | 8 | 0.9718 | 0.8517 | 1.1090 | 0.6842 | 0.0349  | 0.0803 | 0.6790 | 14.1736 | 0.0278 | -68.5502   |

|                              |                     |                           |    |        |        |        |        |         |        |        |         |        |            |
|------------------------------|---------------------|---------------------------|----|--------|--------|--------|--------|---------|--------|--------|---------|--------|------------|
| log_s_Turicibacter_sanguinis | SmallVesselStroke   | MR Egger                  | 8  | 1.1175 | 0.9986 | 1.2505 | 0.1012 | -0.0325 | 0.0282 | 0.2934 | 6.0241  | 0.5369 | -111.2219  |
| log_s_Turicibacter_sanguinis | SmallVesselStroke   | Weighted median           | 8  | 1.0554 | 1.0016 | 1.1121 | 0.0435 | -0.0325 | 0.0282 | 0.2934 | 6.0241  | 0.5369 | -111.2219  |
| log_s_Turicibacter_sanguinis | SmallVesselStroke   | Inverse variance weighted | 8  | 1.0502 | 1.0104 | 1.0917 | 0.0131 | -0.0325 | 0.0282 | 0.2934 | 6.0241  | 0.5369 | -111.2219  |
| log_s_Turicibacter_sanguinis | SmallVesselStroke   | Simple mode               | 8  | 1.0616 | 0.9710 | 1.1608 | 0.2306 | -0.0325 | 0.0282 | 0.2934 | 6.0241  | 0.5369 | -111.2219  |
| log_s_Turicibacter_sanguinis | SmallVesselStroke   | Weighted mode             | 8  | 1.0634 | 0.9739 | 1.1612 | 0.2129 | -0.0325 | 0.0282 | 0.2934 | 6.0241  | 0.5369 | -111.2219  |
| log_s_Turicibacter_sanguinis | Stroke              | MR Egger                  | 9  | 0.9877 | 0.9330 | 1.0455 | 0.6815 | 0.0110  | 0.0140 | 0.4590 | 4.3431  | 0.7395 | -454.7911  |
| log_s_Turicibacter_sanguinis | Stroke              | Weighted median           | 9  | 1.0208 | 0.9959 | 1.0463 | 0.1022 | 0.0110  | 0.0140 | 0.4590 | 4.3431  | 0.7395 | -454.7911  |
| log_s_Turicibacter_sanguinis | Stroke              | Inverse variance weighted | 9  | 1.0091 | 0.9908 | 1.0279 | 0.3315 | 0.0110  | 0.0140 | 0.4590 | 4.3431  | 0.7395 | -454.7911  |
| log_s_Turicibacter_sanguinis | Stroke              | Simple mode               | 9  | 1.0216 | 0.9830 | 1.0617 | 0.3091 | 0.0110  | 0.0140 | 0.4590 | 4.3431  | 0.7395 | -454.7911  |
| log_s_Turicibacter_sanguinis | Stroke              | Weighted mode             | 9  | 1.0216 | 0.9831 | 1.0615 | 0.3074 | 0.0110  | 0.0140 | 0.4590 | 4.3431  | 0.7395 | -454.7911  |
| log_s_Vibrio_cholerae        | CardioEmbolicStroke | MR Egger                  | 11 | 1.1484 | 0.7971 | 1.6545 | 0.4766 | -0.0822 | 0.0837 | 0.3516 | 5.9220  | 0.8218 | -62.1558   |
| log_s_Vibrio_cholerae        | CardioEmbolicStroke | Weighted median           | 11 | 0.9820 | 0.8763 | 1.1006 | 0.7553 | -0.0822 | 0.0837 | 0.3516 | 5.9220  | 0.8218 | -62.1558   |
| log_s_Vibrio_cholerae        | CardioEmbolicStroke | Inverse variance weighted | 11 | 0.9614 | 0.8813 | 1.0488 | 0.3750 | -0.0822 | 0.0837 | 0.3516 | 5.9220  | 0.8218 | -62.1558   |
| log_s_Vibrio_cholerae        | CardioEmbolicStroke | Simple mode               | 11 | 0.9929 | 0.8280 | 1.1906 | 0.9399 | -0.0822 | 0.0837 | 0.3516 | 5.9220  | 0.8218 | -62.1558   |
| log_s_Vibrio_cholerae        | CardioEmbolicStroke | Weighted mode             | 11 | 0.9851 | 0.8186 | 1.1855 | 0.8770 | -0.0822 | 0.0837 | 0.3516 | 5.9220  | 0.8218 | -62.1558   |
| log_s_Vibrio_cholerae        | IschemicStroke      | MR Egger                  | 11 | 1.0257 | 0.9231 | 1.1396 | 0.6486 | -0.0030 | 0.0242 | 0.9038 | 13.7833 | 0.1302 | -285.7273  |
| log_s_Vibrio_cholerae        | IschemicStroke      | Weighted median           | 11 | 1.0222 | 0.9929 | 1.0524 | 0.1382 | -0.0030 | 0.0242 | 0.9038 | 13.7833 | 0.1302 | -285.7273  |
| log_s_Vibrio_cholerae        | IschemicStroke      | Inverse variance weighted | 11 | 1.0190 | 0.9952 | 1.0435 | 0.1192 | -0.0030 | 0.0242 | 0.9038 | 13.7833 | 0.1302 | -285.7273  |
| log_s_Vibrio_cholerae        | IschemicStroke      | Simple mode               | 11 | 1.0283 | 0.9783 | 1.0807 | 0.2980 | -0.0030 | 0.0242 | 0.9038 | 13.7833 | 0.1302 | -285.7273  |
| log_s_Vibrio_cholerae        | IschemicStroke      | Weighted mode             | 11 | 1.0283 | 0.9783 | 1.0808 | 0.2983 | -0.0030 | 0.0242 | 0.9038 | 13.7833 | 0.1302 | -285.7273  |
| log_s_Vibrio_cholerae        | LargeArteryStroke   | MR Egger                  | 11 | 1.1155 | 0.8516 | 1.4611 | 0.4478 | -0.0175 | 0.0619 | 0.7840 | 7.7582  | 0.5587 | -61.7187   |
| log_s_Vibrio_cholerae        | LargeArteryStroke   | Weighted median           | 11 | 1.1100 | 1.0146 | 1.2143 | 0.0228 | -0.0175 | 0.0619 | 0.7840 | 7.7582  | 0.5587 | -61.7187   |
| log_s_Vibrio_cholerae        | LargeArteryStroke   | Inverse variance weighted | 11 | 1.0742 | 1.0067 | 1.1462 | 0.0307 | -0.0175 | 0.0619 | 0.7840 | 7.7582  | 0.5587 | -61.7187   |
| log_s_Vibrio_cholerae        | LargeArteryStroke   | Simple mode               | 11 | 1.1344 | 1.0037 | 1.2821 | 0.0711 | -0.0175 | 0.0619 | 0.7840 | 7.7582  | 0.5587 | -61.7187   |
| log_s_Vibrio_cholerae        | LargeArteryStroke   | Weighted mode             | 11 | 1.1344 | 0.9929 | 1.2960 | 0.0932 | -0.0175 | 0.0619 | 0.7840 | 7.7582  | 0.5587 | -61.7187   |
| log_s_Vibrio_cholerae        | SmallVesselStroke   | MR Egger                  | 11 | 0.9999 | 0.8410 | 1.1888 | 0.9992 | 0.0112  | 0.0397 | 0.7833 | 11.6710 | 0.2325 | -217.1341  |
| log_s_Vibrio_cholerae        | SmallVesselStroke   | Weighted median           | 11 | 1.0171 | 0.9658 | 1.0712 | 0.5199 | 0.0112  | 0.0397 | 0.7833 | 11.6710 | 0.2325 | -217.1341  |
| log_s_Vibrio_cholerae        | SmallVesselStroke   | Inverse variance weighted | 11 | 1.0245 | 0.9850 | 1.0656 | 0.2275 | 0.0112  | 0.0397 | 0.7833 | 11.6710 | 0.2325 | -217.1341  |
| log_s_Vibrio_cholerae        | SmallVesselStroke   | Simple mode               | 11 | 1.0185 | 0.9391 | 1.1046 | 0.6680 | 0.0112  | 0.0397 | 0.7833 | 11.6710 | 0.2325 | -217.1341  |
| log_s_Vibrio_cholerae        | SmallVesselStroke   | Weighted mode             | 11 | 1.0095 | 0.9311 | 1.0945 | 0.8237 | 0.0112  | 0.0397 | 0.7833 | 11.6710 | 0.2325 | -217.1341  |
| log_s_Vibrio_cholerae        | Stroke              | MR Egger                  | 12 | 1.0187 | 0.9401 | 1.1039 | 0.6606 | -0.0055 | 0.0183 | 0.7700 | 12.6841 | 0.2419 | -414.4706  |
| log_s_Vibrio_cholerae        | Stroke              | Weighted median           | 12 | 1.0064 | 0.9828 | 1.0306 | 0.5989 | -0.0055 | 0.0183 | 0.7700 | 12.6841 | 0.2419 | -414.4706  |
| log_s_Vibrio_cholerae        | Stroke              | Inverse variance weighted | 12 | 1.0066 | 0.9885 | 1.0250 | 0.4777 | -0.0055 | 0.0183 | 0.7700 | 12.6841 | 0.2419 | -414.4706  |
| log_s_Vibrio_cholerae        | Stroke              | Simple mode               | 12 | 1.0060 | 0.9614 | 1.0527 | 0.7995 | -0.0055 | 0.0183 | 0.7700 | 12.6841 | 0.2419 | -414.4706  |
| log_s_Vibrio_cholerae        | Stroke              | Weighted mode             | 12 | 1.0077 | 0.9678 | 1.0492 | 0.7174 | -0.0055 | 0.0183 | 0.7700 | 12.6841 | 0.2419 | -414.4706  |
| log_s_Vibrio_furnissii       | CardioEmbolicStroke | MR Egger                  | 5  | 1.1112 | 0.2140 | 5.7693 | 0.9081 | -0.0470 | 0.3180 | 0.8919 | 2.1044  | 0.5510 | 2545.1234  |
| log_s_Vibrio_furnissii       | CardioEmbolicStroke | Weighted median           | 5  | 0.9891 | 0.8436 | 1.1596 | 0.8921 | -0.0470 | 0.3180 | 0.8919 | 2.1044  | 0.5510 | 2545.1234  |
| log_s_Vibrio_furnissii       | CardioEmbolicStroke | Inverse variance weighted | 5  | 0.9817 | 0.8665 | 1.1123 | 0.7725 | -0.0470 | 0.3180 | 0.8919 | 2.1044  | 0.5510 | 2545.1234  |
| log_s_Vibrio_furnissii       | CardioEmbolicStroke | Simple mode               | 5  | 0.9527 | 0.7561 | 1.2005 | 0.7025 | -0.0470 | 0.3180 | 0.8919 | 2.1044  | 0.5510 | 2545.1234  |
| log_s_Vibrio_furnissii       | CardioEmbolicStroke | Weighted mode             | 5  | 0.9479 | 0.7616 | 1.1798 | 0.6567 | -0.0470 | 0.3180 | 0.8919 | 2.1044  | 0.5510 | 2545.1234  |
| log_s_Vibrio_furnissii       | IschemicStroke      | MR Egger                  | 5  | 1.0659 | 0.7288 | 1.5588 | 0.7638 | -0.0186 | 0.0734 | 0.8163 | 1.5484  | 0.6712 | 12075.4112 |
| log_s_Vibrio_furnissii       | IschemicStroke      | Weighted median           | 5  | 1.0147 | 0.9769 | 1.0541 | 0.4507 | -0.0186 | 0.0734 | 0.8163 | 1.5484  | 0.6712 | 12075.4112 |
| log_s_Vibrio_furnissii       | IschemicStroke      | Inverse variance weighted | 5  | 1.0149 | 0.9861 | 1.0446 | 0.3140 | -0.0186 | 0.0734 | 0.8163 | 1.5484  | 0.6712 | 12075.4112 |
| log_s_Vibrio_furnissii       | IschemicStroke      | Simple mode               | 5  | 1.0061 | 0.9576 | 1.0570 | 0.8213 | -0.0186 | 0.0734 | 0.8163 | 1.5484  | 0.6712 | 12075.4112 |
| log_s_Vibrio_furnissii       | IschemicStroke      | Weighted mode             | 5  | 1.0033 | 0.9545 | 1.0546 | 0.9034 | -0.0186 | 0.0734 | 0.8163 | 1.5484  | 0.6712 | 12075.4112 |
| log_s_Vibrio_furnissii       | LargeArteryStroke   | MR Egger                  | 5  | 1.1602 | 0.2093 | 6.4322 | 0.8758 | -0.0658 | 0.3307 | 0.8551 | 5.8368  | 0.1198 | 1784.5289  |
| log_s_Vibrio_furnissii       | LargeArteryStroke   | Weighted median           | 5  | 1.0404 | 0.9132 | 1.1853 | 0.5518 | -0.0658 | 0.3307 | 0.8551 | 5.8368  | 0.1198 | 1784.5289  |
| log_s_Vibrio_furnissii       | LargeArteryStroke   | Inverse variance weighted | 5  | 0.9756 | 0.8709 | 1.0929 | 0.6700 | -0.0658 | 0.3307 | 0.8551 | 5.8368  | 0.1198 | 1784.5289  |
| log_s_Vibrio_furnissii       | LargeArteryStroke   | Simple mode               | 5  | 1.0642 | 0.8668 | 1.3064 | 0.5843 | -0.0658 | 0.3307 | 0.8551 | 5.8368  | 0.1198 | 1784.5289  |
| log_s_Vibrio_furnissii       | LargeArteryStroke   | Weighted mode             | 5  | 1.0656 | 0.8873 | 1.2798 | 0.5336 | -0.0658 | 0.3307 | 0.8551 | 5.8368  | 0.1198 | 1784.5289  |
| log_s_Vibrio_furnissii       | SmallVesselStroke   | MR Egger                  | 5  | 0.9025 | 0.4551 | 1.7897 | 0.7881 | 0.0538  | 0.1322 | 0.7115 | 0.1382  | 0.9869 | 6673.4242  |
| log_s_Vibrio_furnissii       | SmallVesselStroke   | Weighted median           | 5  | 1.0334 | 0.9689 | 1.1021 | 0.3179 | 0.0538  | 0.1322 | 0.7115 | 0.1382  | 0.9869 | 6673.4242  |
| log_s_Vibrio_furnissii       | SmallVesselStroke   | Inverse variance weighted | 5  | 1.0398 | 0.9871 | 1.0953 | 0.1411 | 0.0538  | 0.1322 | 0.7115 | 0.1382  | 0.9869 | 6673.4242  |

|                                    |                     |                           |    |        |        |        |        |         |        |        |         |        |              |
|------------------------------------|---------------------|---------------------------|----|--------|--------|--------|--------|---------|--------|--------|---------|--------|--------------|
| log_s_Vibrio_furnissii             | SmallVesselStroke   | Simple mode               | 5  | 1.0266 | 0.9453 | 1.1149 | 0.5662 | 0.0538  | 0.1322 | 0.7115 | 0.1382  | 0.9869 | 6673.4242    |
| log_s_Vibrio_furnissii             | SmallVesselStroke   | Weighted mode             | 5  | 1.0268 | 0.9462 | 1.1142 | 0.5611 | 0.0538  | 0.1322 | 0.7115 | 0.1382  | 0.9869 | 6673.4242    |
| log_s_Vibrio_furnissii             | Stroke              | MR Egger                  | 6  | 0.9923 | 0.7505 | 1.3118 | 0.9591 | 0.0081  | 0.0545 | 0.8894 | 0.7065  | 0.9505 | 1008827.4526 |
| log_s_Vibrio_furnissii             | Stroke              | Weighted median           | 6  | 1.0097 | 0.9793 | 1.0411 | 0.5347 | 0.0081  | 0.0545 | 0.8894 | 0.7065  | 0.9505 | 1008827.4526 |
| log_s_Vibrio_furnissii             | Stroke              | Inverse variance weighted | 6  | 1.0133 | 0.9893 | 1.0379 | 0.2788 | 0.0081  | 0.0545 | 0.8894 | 0.7065  | 0.9505 | 1008827.4526 |
| log_s_Vibrio_furnissii             | Stroke              | Simple mode               | 6  | 1.0096 | 0.9713 | 1.0494 | 0.6497 | 0.0081  | 0.0545 | 0.8894 | 0.7065  | 0.9505 | 1008827.4526 |
| log_s_Vibrio_furnissii             | Stroke              | Weighted mode             | 6  | 1.0089 | 0.9730 | 1.0461 | 0.6523 | 0.0081  | 0.0545 | 0.8894 | 0.7065  | 0.9505 | 1008827.4526 |
| log_s_unclassified_Streptococcus_o | CardioEmbolicStroke | MR Egger                  | 6  | 1.3280 | 0.6025 | 2.9270 | 0.5206 | -0.1108 | 0.1780 | 0.5674 | 13.3546 | 0.0097 | -526.3825    |
| log_s_unclassified_Streptococcus_o | CardioEmbolicStroke | Weighted median           | 6  | 0.9544 | 0.8112 | 1.1227 | 0.5731 | -0.1108 | 0.1780 | 0.5674 | 13.3546 | 0.0097 | -526.3825    |
| log_s_unclassified_Streptococcus_o | CardioEmbolicStroke | Inverse variance weighted | 6  | 1.0412 | 0.8683 | 1.2484 | 0.6633 | -0.1108 | 0.1780 | 0.5674 | 13.3546 | 0.0097 | -526.3825    |
| log_s_unclassified_Streptococcus_o | CardioEmbolicStroke | Simple mode               | 6  | 0.9281 | 0.7490 | 1.1500 | 0.5256 | -0.1108 | 0.1780 | 0.5674 | 13.3546 | 0.0097 | -526.3825    |
| log_s_unclassified_Streptococcus_o | CardioEmbolicStroke | Weighted mode             | 6  | 0.9324 | 0.7509 | 1.1578 | 0.5543 | -0.1108 | 0.1780 | 0.5674 | 13.3546 | 0.0097 | -526.3825    |
| log_s_unclassified_Streptococcus_o | IschemicStroke      | MR Egger                  | 9  | 0.9908 | 0.9370 | 1.0477 | 0.7548 | 0.0072  | 0.0152 | 0.6486 | 9.7161  | 0.2052 | -253.4563    |
| log_s_unclassified_Streptococcus_o | IschemicStroke      | Weighted median           | 9  | 1.0042 | 0.9766 | 1.0325 | 0.7683 | 0.0072  | 0.0152 | 0.6486 | 9.7161  | 0.2052 | -253.4563    |
| log_s_unclassified_Streptococcus_o | IschemicStroke      | Inverse variance weighted | 9  | 1.0031 | 0.9813 | 1.0254 | 0.7823 | 0.0072  | 0.0152 | 0.6486 | 9.7161  | 0.2052 | -253.4563    |
| log_s_unclassified_Streptococcus_o | IschemicStroke      | Simple mode               | 9  | 1.0093 | 0.9658 | 1.0547 | 0.6924 | 0.0072  | 0.0152 | 0.6486 | 9.7161  | 0.2052 | -253.4563    |
| log_s_unclassified_Streptococcus_o | IschemicStroke      | Weighted mode             | 9  | 1.0068 | 0.9646 | 1.0509 | 0.7645 | 0.0072  | 0.0152 | 0.6486 | 9.7161  | 0.2052 | -253.4563    |
| log_s_unclassified_Streptococcus_o | LargeArteryStroke   | MR Egger                  | 9  | 0.9638 | 0.8241 | 1.1272 | 0.6584 | 0.0562  | 0.0422 | 0.2254 | 8.4959  | 0.3866 | -34.4181     |
| log_s_unclassified_Streptococcus_o | LargeArteryStroke   | Weighted median           | 9  | 1.0527 | 0.9632 | 1.1504 | 0.2572 | 0.0562  | 0.0422 | 0.2254 | 8.4959  | 0.3866 | -34.4181     |
| log_s_unclassified_Streptococcus_o | LargeArteryStroke   | Inverse variance weighted | 9  | 1.0619 | 0.9943 | 1.1342 | 0.0736 | 0.0562  | 0.0422 | 0.2254 | 8.4959  | 0.3866 | -34.4181     |
| log_s_unclassified_Streptococcus_o | LargeArteryStroke   | Simple mode               | 9  | 1.0494 | 0.9074 | 1.2135 | 0.5341 | 0.0562  | 0.0422 | 0.2254 | 8.4959  | 0.3866 | -34.4181     |
| log_s_unclassified_Streptococcus_o | LargeArteryStroke   | Weighted mode             | 9  | 1.0451 | 0.9241 | 1.1820 | 0.5022 | 0.0562  | 0.0422 | 0.2254 | 8.4959  | 0.3866 | -34.4181     |
| log_s_unclassified_Streptococcus_o | SmallVesselStroke   | MR Egger                  | 9  | 0.8901 | 0.8166 | 0.9701 | 0.0329 | 0.0489  | 0.0234 | 0.0745 | 8.9027  | 0.3506 | -57.3518     |
| log_s_unclassified_Streptococcus_o | SmallVesselStroke   | Weighted median           | 9  | 0.9617 | 0.9156 | 1.0101 | 0.1188 | 0.0489  | 0.0234 | 0.0745 | 8.9027  | 0.3506 | -57.3518     |
| log_s_unclassified_Streptococcus_o | SmallVesselStroke   | Inverse variance weighted | 9  | 0.9680 | 0.9325 | 1.0048 | 0.0871 | 0.0489  | 0.0234 | 0.0745 | 8.9027  | 0.3506 | -57.3518     |
| log_s_unclassified_Streptococcus_o | SmallVesselStroke   | Simple mode               | 9  | 0.9572 | 0.8854 | 1.0348 | 0.3037 | 0.0489  | 0.0234 | 0.0745 | 8.9027  | 0.3506 | -57.3518     |
| log_s_unclassified_Streptococcus_o | SmallVesselStroke   | Weighted mode             | 9  | 0.9572 | 0.8914 | 1.0279 | 0.2635 | 0.0489  | 0.0234 | 0.0745 | 8.9027  | 0.3506 | -57.3518     |
| log_s_unclassified_Streptococcus_o | Stroke              | MR Egger                  | 9  | 0.9538 | 0.9004 | 1.0103 | 0.1509 | 0.0264  | 0.0155 | 0.1329 | 18.9691 | 0.0150 | -160.1974    |
| log_s_unclassified_Streptococcus_o | Stroke              | Weighted median           | 9  | 0.9842 | 0.9586 | 1.0105 | 0.2376 | 0.0264  | 0.0155 | 0.1329 | 18.9691 | 0.0150 | -160.1974    |
| log_s_unclassified_Streptococcus_o | Stroke              | Inverse variance weighted | 9  | 0.9982 | 0.9724 | 1.0247 | 0.8930 | 0.0264  | 0.0155 | 0.1329 | 18.9691 | 0.0150 | -160.1974    |
| log_s_unclassified_Streptococcus_o | Stroke              | Simple mode               | 9  | 0.9786 | 0.9385 | 1.0205 | 0.3418 | 0.0264  | 0.0155 | 0.1329 | 18.9691 | 0.0150 | -160.1974    |
| log_s_unclassified_Streptococcus_o | Stroke              | Weighted mode             | 9  | 0.9771 | 0.9436 | 1.0119 | 0.2304 | 0.0264  | 0.0155 | 0.1329 | 18.9691 | 0.0150 | -160.1974    |
| o_Actinomycetales                  | CardioEmbolicStroke | MR Egger                  | 15 | 1.8280 | 0.8609 | 3.8815 | 0.1404 | -0.1117 | 0.0692 | 0.1306 | 28.1064 | 0.0138 | 150.7671     |
| o_Actinomycetales                  | CardioEmbolicStroke | Weighted median           | 15 | 0.9444 | 0.7179 | 1.2425 | 0.6828 | -0.1117 | 0.0692 | 0.1306 | 28.1064 | 0.0138 | 150.7671     |
| o_Actinomycetales                  | CardioEmbolicStroke | Inverse variance weighted | 15 | 1.0145 | 0.7912 | 1.3008 | 0.9096 | -0.1117 | 0.0692 | 0.1306 | 28.1064 | 0.0138 | 150.7671     |
| o_Actinomycetales                  | CardioEmbolicStroke | Simple mode               | 15 | 1.0412 | 0.6559 | 1.6530 | 0.8664 | -0.1117 | 0.0692 | 0.1306 | 28.1064 | 0.0138 | 150.7671     |
| o_Actinomycetales                  | CardioEmbolicStroke | Weighted mode             | 15 | 0.9654 | 0.6509 | 1.4318 | 0.8635 | -0.1117 | 0.0692 | 0.1306 | 28.1064 | 0.0138 | 150.7671     |
| o_Actinomycetales                  | IschemicStroke      | MR Egger                  | 20 | 0.9405 | 0.8709 | 1.0157 | 0.1355 | 0.0098  | 0.0081 | 0.2400 | 18.2780 | 0.5039 | -223.9098    |
| o_Actinomycetales                  | IschemicStroke      | Weighted median           | 20 | 0.9751 | 0.9291 | 1.0235 | 0.3081 | 0.0098  | 0.0081 | 0.2400 | 18.2780 | 0.5039 | -223.9098    |
| o_Actinomycetales                  | IschemicStroke      | Inverse variance weighted | 20 | 0.9813 | 0.9476 | 1.0162 | 0.2904 | 0.0098  | 0.0081 | 0.2400 | 18.2780 | 0.5039 | -223.9098    |
| o_Actinomycetales                  | IschemicStroke      | Simple mode               | 20 | 0.9382 | 0.8553 | 1.0291 | 0.1923 | 0.0098  | 0.0081 | 0.2400 | 18.2780 | 0.5039 | -223.9098    |
| o_Actinomycetales                  | IschemicStroke      | Weighted mode             | 20 | 0.9596 | 0.8875 | 1.0376 | 0.3138 | 0.0098  | 0.0081 | 0.2400 | 18.2780 | 0.5039 | -223.9098    |
| o_Actinomycetales                  | LargeArteryStroke   | MR Egger                  | 17 | 1.3590 | 0.9728 | 1.8986 | 0.0923 | -0.0553 | 0.0324 | 0.1083 | 13.4760 | 0.6377 | -2167.5202   |
| o_Actinomycetales                  | LargeArteryStroke   | Weighted median           | 17 | 1.0646 | 0.9023 | 1.2561 | 0.4581 | -0.0553 | 0.0324 | 0.1083 | 13.4760 | 0.6377 | -2167.5202   |
| o_Actinomycetales                  | LargeArteryStroke   | Inverse variance weighted | 17 | 1.0369 | 0.9159 | 1.1738 | 0.5671 | -0.0553 | 0.0324 | 0.1083 | 13.4760 | 0.6377 | -2167.5202   |
| o_Actinomycetales                  | LargeArteryStroke   | Simple mode               | 17 | 1.0291 | 0.7746 | 1.3672 | 0.8455 | -0.0553 | 0.0324 | 0.1083 | 13.4760 | 0.6377 | -2167.5202   |
| o_Actinomycetales                  | LargeArteryStroke   | Weighted mode             | 17 | 1.0387 | 0.7910 | 1.3638 | 0.7883 | -0.0553 | 0.0324 | 0.1083 | 13.4760 | 0.6377 | -2167.5202   |
| o_Actinomycetales                  | SmallVesselStroke   | MR Egger                  | 18 | 0.8534 | 0.7002 | 1.0400 | 0.1357 | 0.0259  | 0.0193 | 0.1979 | 21.2499 | 0.2153 | -1160.0559   |
| o_Actinomycetales                  | SmallVesselStroke   | Weighted median           | 18 | 0.9258 | 0.8375 | 1.0234 | 0.1315 | 0.0259  | 0.0193 | 0.1979 | 21.2499 | 0.2153 | -1160.0559   |
| o_Actinomycetales                  | SmallVesselStroke   | Inverse variance weighted | 18 | 0.9676 | 0.8965 | 1.0443 | 0.3969 | 0.0259  | 0.0193 | 0.1979 | 21.2499 | 0.2153 | -1160.0559   |
| o_Actinomycetales                  | SmallVesselStroke   | Simple mode               | 18 | 0.9023 | 0.7585 | 1.0734 | 0.2619 | 0.0259  | 0.0193 | 0.1979 | 21.2499 | 0.2153 | -1160.0559   |
| o_Actinomycetales                  | SmallVesselStroke   | Weighted mode             | 18 | 0.9138 | 0.7822 | 1.0675 | 0.2716 | 0.0259  | 0.0193 | 0.1979 | 21.2499 | 0.2153 | -1160.0559   |
| o_Actinomycetales                  | Stroke              | MR Egger                  | 23 | 0.9089 | 0.8345 | 0.9899 | 0.0397 | 0.0178  | 0.0084 | 0.0467 | 28.9337 | 0.1468 | -323.4832    |

|                     |                     |                           |    |        |        |        |        |         |        |        |         |        |           |
|---------------------|---------------------|---------------------------|----|--------|--------|--------|--------|---------|--------|--------|---------|--------|-----------|
| o_Actinomycetales   | Stroke              | Weighted median           | 23 | 0.9845 | 0.9396 | 1.0315 | 0.5103 | 0.0178  | 0.0084 | 0.0467 | 28.9337 | 0.1468 | -323.4832 |
| o_Actinomycetales   | Stroke              | Inverse variance weighted | 23 | 0.9893 | 0.9547 | 1.0253 | 0.5561 | 0.0178  | 0.0084 | 0.0467 | 28.9337 | 0.1468 | -323.4832 |
| o_Actinomycetales   | Stroke              | Simple mode               | 23 | 1.0647 | 0.9646 | 1.1751 | 0.2264 | 0.0178  | 0.0084 | 0.0467 | 28.9337 | 0.1468 | -323.4832 |
| o_Actinomycetales   | Stroke              | Weighted mode             | 23 | 0.9353 | 0.8554 | 1.0227 | 0.1565 | 0.0178  | 0.0084 | 0.0467 | 28.9337 | 0.1468 | -323.4832 |
| o_Bacillales        | CardioEmbolicStroke | MR Egger                  | 10 | 1.0267 | 0.5802 | 1.8166 | 0.9302 | 0.0194  | 0.0511 | 0.7135 | 4.7752  | 0.7813 | 140.4017  |
| o_Bacillales        | CardioEmbolicStroke | Weighted median           | 10 | 1.1816 | 0.8871 | 1.5739 | 0.2538 | 0.0194  | 0.0511 | 0.7135 | 4.7752  | 0.7813 | 140.4017  |
| o_Bacillales        | CardioEmbolicStroke | Inverse variance weighted | 10 | 1.1373 | 0.9143 | 1.4147 | 0.2478 | 0.0194  | 0.0511 | 0.7135 | 4.7752  | 0.7813 | 140.4017  |
| o_Bacillales        | CardioEmbolicStroke | Simple mode               | 10 | 1.2020 | 0.7779 | 1.8573 | 0.4288 | 0.0194  | 0.0511 | 0.7135 | 4.7752  | 0.7813 | 140.4017  |
| o_Bacillales        | CardioEmbolicStroke | Weighted mode             | 10 | 1.2504 | 0.8097 | 1.9309 | 0.3399 | 0.0194  | 0.0511 | 0.7135 | 4.7752  | 0.7813 | 140.4017  |
| o_Bacillales        | IschemicStroke      | MR Egger                  | 17 | 1.0299 | 0.9494 | 1.1171 | 0.4894 | -0.0087 | 0.0087 | 0.3354 | 6.4348  | 0.9827 | -544.7717 |
| o_Bacillales        | IschemicStroke      | Weighted median           | 17 | 0.9938 | 0.9399 | 1.0509 | 0.8284 | -0.0087 | 0.0087 | 0.3354 | 6.4348  | 0.9827 | -544.7717 |
| o_Bacillales        | IschemicStroke      | Inverse variance weighted | 17 | 0.9936 | 0.9542 | 1.0347 | 0.7571 | -0.0087 | 0.0087 | 0.3354 | 6.4348  | 0.9827 | -544.7717 |
| o_Bacillales        | IschemicStroke      | Simple mode               | 17 | 0.9920 | 0.9072 | 1.0847 | 0.8621 | -0.0087 | 0.0087 | 0.3354 | 6.4348  | 0.9827 | -544.7717 |
| o_Bacillales        | IschemicStroke      | Weighted mode             | 17 | 0.9882 | 0.9072 | 1.0766 | 0.7901 | -0.0087 | 0.0087 | 0.3354 | 6.4348  | 0.9827 | -544.7717 |
| o_Bacillales        | LargeArteryStroke   | MR Egger                  | 13 | 1.1202 | 0.7861 | 1.5962 | 0.5427 | -0.0369 | 0.0349 | 0.3134 | 15.2176 | 0.2298 | -901.5003 |
| o_Bacillales        | LargeArteryStroke   | Weighted median           | 13 | 0.9921 | 0.8060 | 1.2213 | 0.9406 | -0.0369 | 0.0349 | 0.3134 | 15.2176 | 0.2298 | -901.5003 |
| o_Bacillales        | LargeArteryStroke   | Inverse variance weighted | 13 | 0.9455 | 0.8029 | 1.1134 | 0.5017 | -0.0369 | 0.0349 | 0.3134 | 15.2176 | 0.2298 | -901.5003 |
| o_Bacillales        | LargeArteryStroke   | Simple mode               | 13 | 0.8554 | 0.6021 | 1.2152 | 0.4004 | -0.0369 | 0.0349 | 0.3134 | 15.2176 | 0.2298 | -901.5003 |
| o_Bacillales        | LargeArteryStroke   | Weighted mode             | 13 | 0.9830 | 0.7499 | 1.2885 | 0.9033 | -0.0369 | 0.0349 | 0.3134 | 15.2176 | 0.2298 | -901.5003 |
| o_Bacillales        | SmallVesselStroke   | MR Egger                  | 15 | 1.0788 | 0.9255 | 1.2576 | 0.3498 | -0.0194 | 0.0160 | 0.2474 | 13.8219 | 0.4631 | -237.2974 |
| o_Bacillales        | SmallVesselStroke   | Weighted median           | 15 | 0.9994 | 0.9060 | 1.1024 | 0.9908 | -0.0194 | 0.0160 | 0.2474 | 13.8219 | 0.4631 | -237.2974 |
| o_Bacillales        | SmallVesselStroke   | Inverse variance weighted | 15 | 0.9933 | 0.9214 | 1.0709 | 0.8618 | -0.0194 | 0.0160 | 0.2474 | 13.8219 | 0.4631 | -237.2974 |
| o_Bacillales        | SmallVesselStroke   | Simple mode               | 15 | 0.9744 | 0.8299 | 1.1440 | 0.7560 | -0.0194 | 0.0160 | 0.2474 | 13.8219 | 0.4631 | -237.2974 |
| o_Bacillales        | SmallVesselStroke   | Weighted mode             | 15 | 0.9885 | 0.8640 | 1.1310 | 0.8688 | -0.0194 | 0.0160 | 0.2474 | 13.8219 | 0.4631 | -237.2974 |
| o_Bacillales        | Stroke              | MR Egger                  | 16 | 0.9954 | 0.9269 | 1.0689 | 0.9004 | -0.0033 | 0.0079 | 0.6791 | 6.7849  | 0.9427 | -553.9067 |
| o_Bacillales        | Stroke              | Weighted median           | 16 | 0.9674 | 0.9240 | 1.0128 | 0.1566 | -0.0033 | 0.0079 | 0.6791 | 6.7849  | 0.9427 | -553.9067 |
| o_Bacillales        | Stroke              | Inverse variance weighted | 16 | 0.9822 | 0.9480 | 1.0176 | 0.3205 | -0.0033 | 0.0079 | 0.6791 | 6.7849  | 0.9427 | -553.9067 |
| o_Bacillales        | Stroke              | Simple mode               | 16 | 0.9570 | 0.8770 | 1.0444 | 0.3403 | -0.0033 | 0.0079 | 0.6791 | 6.7849  | 0.9427 | -553.9067 |
| o_Bacillales        | Stroke              | Weighted mode             | 16 | 0.9570 | 0.8839 | 1.0363 | 0.2962 | -0.0033 | 0.0079 | 0.6791 | 6.7849  | 0.9427 | -553.9067 |
| o_Campylobacterales | CardioEmbolicStroke | MR Egger                  | 13 | 0.7251 | 0.5845 | 0.8995 | 0.0138 | 0.0698  | 0.0394 | 0.1039 | 18.5319 | 0.1005 | -16.2600  |
| o_Campylobacterales | CardioEmbolicStroke | Weighted median           | 13 | 0.8644 | 0.7310 | 1.0223 | 0.0887 | 0.0698  | 0.0394 | 0.1039 | 18.5319 | 0.1005 | -16.2600  |
| o_Campylobacterales | CardioEmbolicStroke | Inverse variance weighted | 13 | 0.8498 | 0.7418 | 0.9735 | 0.0189 | 0.0698  | 0.0394 | 0.1039 | 18.5319 | 0.1005 | -16.2600  |
| o_Campylobacterales | CardioEmbolicStroke | Simple mode               | 13 | 1.0269 | 0.7699 | 1.3698 | 0.8595 | 0.0698  | 0.0394 | 0.1039 | 18.5319 | 0.1005 | -16.2600  |
| o_Campylobacterales | CardioEmbolicStroke | Weighted mode             | 13 | 0.7812 | 0.6547 | 0.9321 | 0.0179 | 0.0698  | 0.0394 | 0.1039 | 18.5319 | 0.1005 | -16.2600  |
| o_Campylobacterales | IschemicStroke      | MR Egger                  | 20 | 0.9910 | 0.9588 | 1.0243 | 0.5977 | 0.0025  | 0.0075 | 0.7403 | 20.5136 | 0.3047 | -32.0720  |
| o_Campylobacterales | IschemicStroke      | Weighted median           | 20 | 0.9986 | 0.9702 | 1.0278 | 0.9240 | 0.0025  | 0.0075 | 0.7403 | 20.5136 | 0.3047 | -32.0720  |
| o_Campylobacterales | IschemicStroke      | Inverse variance weighted | 20 | 0.9954 | 0.9756 | 1.0156 | 0.6524 | 0.0025  | 0.0075 | 0.7403 | 20.5136 | 0.3047 | -32.0720  |
| o_Campylobacterales | IschemicStroke      | Simple mode               | 20 | 1.0174 | 0.9681 | 1.0692 | 0.5041 | 0.0025  | 0.0075 | 0.7403 | 20.5136 | 0.3047 | -32.0720  |
| o_Campylobacterales | IschemicStroke      | Weighted mode             | 20 | 1.0037 | 0.9743 | 1.0339 | 0.8123 | 0.0025  | 0.0075 | 0.7403 | 20.5136 | 0.3047 | -32.0720  |
| o_Campylobacterales | LargeArteryStroke   | MR Egger                  | 17 | 0.9927 | 0.8908 | 1.1063 | 0.8969 | 0.0250  | 0.0235 | 0.3029 | 16.4704 | 0.4206 | -20.9182  |
| o_Campylobacterales | LargeArteryStroke   | Weighted median           | 17 | 1.0013 | 0.9095 | 1.1024 | 0.9790 | 0.0250  | 0.0235 | 0.3029 | 16.4704 | 0.4206 | -20.9182  |
| o_Campylobacterales | LargeArteryStroke   | Inverse variance weighted | 17 | 1.0399 | 0.9723 | 1.1121 | 0.2538 | 0.0250  | 0.0235 | 0.3029 | 16.4704 | 0.4206 | -20.9182  |
| o_Campylobacterales | LargeArteryStroke   | Simple mode               | 17 | 1.1100 | 0.9274 | 1.3286 | 0.2719 | 0.0250  | 0.0235 | 0.3029 | 16.4704 | 0.4206 | -20.9182  |
| o_Campylobacterales | LargeArteryStroke   | Weighted mode             | 17 | 0.9995 | 0.9076 | 1.1007 | 0.9922 | 0.0250  | 0.0235 | 0.3029 | 16.4704 | 0.4206 | -20.9182  |
| o_Campylobacterales | SmallVesselStroke   | MR Egger                  | 17 | 0.9564 | 0.8869 | 1.0314 | 0.2655 | 0.0135  | 0.0166 | 0.4286 | 25.0545 | 0.0492 | -24.7415  |
| o_Campylobacterales | SmallVesselStroke   | Weighted median           | 17 | 0.9701 | 0.9186 | 1.0246 | 0.2765 | 0.0135  | 0.0166 | 0.4286 | 25.0545 | 0.0492 | -24.7415  |
| o_Campylobacterales | SmallVesselStroke   | Inverse variance weighted | 17 | 0.9802 | 0.9359 | 1.0267 | 0.3983 | 0.0135  | 0.0166 | 0.4286 | 25.0545 | 0.0492 | -24.7415  |
| o_Campylobacterales | SmallVesselStroke   | Simple mode               | 17 | 0.9559 | 0.8717 | 1.0483 | 0.3524 | 0.0135  | 0.0166 | 0.4286 | 25.0545 | 0.0492 | -24.7415  |
| o_Campylobacterales | SmallVesselStroke   | Weighted mode             | 17 | 0.9639 | 0.9121 | 1.0187 | 0.2110 | 0.0135  | 0.0166 | 0.4286 | 25.0545 | 0.0492 | -24.7415  |
| o_Campylobacterales | Stroke              | MR Egger                  | 22 | 0.9955 | 0.9641 | 1.0278 | 0.7826 | -0.0010 | 0.0067 | 0.8807 | 23.8493 | 0.2490 | -34.7600  |
| o_Campylobacterales | Stroke              | Weighted median           | 22 | 0.9978 | 0.9697 | 1.0266 | 0.8781 | -0.0010 | 0.0067 | 0.8807 | 23.8493 | 0.2490 | -34.7600  |
| o_Campylobacterales | Stroke              | Inverse variance weighted | 22 | 0.9935 | 0.9750 | 1.0123 | 0.4945 | -0.0010 | 0.0067 | 0.8807 | 23.8493 | 0.2490 | -34.7600  |
| o_Campylobacterales | Stroke              | Simple mode               | 22 | 0.9948 | 0.9494 | 1.0424 | 0.8293 | -0.0010 | 0.0067 | 0.8807 | 23.8493 | 0.2490 | -34.7600  |

|                      |                     |                           |    |        |        |        |        |         |        |        |         |        |            |
|----------------------|---------------------|---------------------------|----|--------|--------|--------|--------|---------|--------|--------|---------|--------|------------|
| o_Campylobacterales  | Stroke              | Weighted mode             | 22 | 0.9967 | 0.9704 | 1.0236 | 0.8084 | -0.0010 | 0.0067 | 0.8807 | 23.8493 | 0.2490 | -34.7600   |
| o_Clostridiales      | CardioEmbolicStroke | MR Egger                  | 11 | 0.8061 | 0.3259 | 1.9936 | 0.6518 | 0.0243  | 0.0662 | 0.7221 | 8.8372  | 0.4524 | 23.2601    |
| o_Clostridiales      | CardioEmbolicStroke | Weighted median           | 11 | 0.8906 | 0.6333 | 1.2525 | 0.5055 | 0.0243  | 0.0662 | 0.7221 | 8.8372  | 0.4524 | 23.2601    |
| o_Clostridiales      | CardioEmbolicStroke | Inverse variance weighted | 11 | 0.9483 | 0.7326 | 1.2276 | 0.6870 | 0.0243  | 0.0662 | 0.7221 | 8.8372  | 0.4524 | 23.2601    |
| o_Clostridiales      | CardioEmbolicStroke | Simple mode               | 11 | 0.8447 | 0.4556 | 1.5661 | 0.6039 | 0.0243  | 0.0662 | 0.7221 | 8.8372  | 0.4524 | 23.2601    |
| o_Clostridiales      | CardioEmbolicStroke | Weighted mode             | 11 | 0.8157 | 0.4696 | 1.4166 | 0.4860 | 0.0243  | 0.0662 | 0.7221 | 8.8372  | 0.4524 | 23.2601    |
| o_Clostridiales      | IschemicStroke      | MR Egger                  | 15 | 1.0222 | 0.9048 | 1.1549 | 0.7300 | -0.0044 | 0.0103 | 0.6761 | 7.7509  | 0.8594 | 4953.4319  |
| o_Clostridiales      | IschemicStroke      | Weighted median           | 15 | 0.9951 | 0.9329 | 1.0615 | 0.8822 | -0.0044 | 0.0103 | 0.6761 | 7.7509  | 0.8594 | 4953.4319  |
| o_Clostridiales      | IschemicStroke      | Inverse variance weighted | 15 | 0.9976 | 0.9494 | 1.0484 | 0.9258 | -0.0044 | 0.0103 | 0.6761 | 7.7509  | 0.8594 | 4953.4319  |
| o_Clostridiales      | IschemicStroke      | Simple mode               | 15 | 0.9911 | 0.8957 | 1.0968 | 0.8657 | -0.0044 | 0.0103 | 0.6761 | 7.7509  | 0.8594 | 4953.4319  |
| o_Clostridiales      | IschemicStroke      | Weighted mode             | 15 | 0.9953 | 0.9077 | 1.0914 | 0.9219 | -0.0044 | 0.0103 | 0.6761 | 7.7509  | 0.8594 | 4953.4319  |
| o_Clostridiales      | LargeArteryStroke   | MR Egger                  | 15 | 1.1187 | 0.7512 | 1.6661 | 0.5902 | 0.0067  | 0.0335 | 0.8457 | 11.4336 | 0.5745 | 498.8323   |
| o_Clostridiales      | LargeArteryStroke   | Weighted median           | 15 | 1.1548 | 0.9270 | 1.4385 | 0.1992 | 0.0067  | 0.0335 | 0.8457 | 11.4336 | 0.5745 | 498.8323   |
| o_Clostridiales      | LargeArteryStroke   | Inverse variance weighted | 15 | 1.1608 | 0.9875 | 1.3645 | 0.0708 | 0.0067  | 0.0335 | 0.8457 | 11.4336 | 0.5745 | 498.8323   |
| o_Clostridiales      | LargeArteryStroke   | Simple mode               | 15 | 1.2224 | 0.8536 | 1.7505 | 0.2916 | 0.0067  | 0.0335 | 0.8457 | 11.4336 | 0.5745 | 498.8323   |
| o_Clostridiales      | LargeArteryStroke   | Weighted mode             | 15 | 1.1814 | 0.8431 | 1.6554 | 0.3493 | 0.0067  | 0.0335 | 0.8457 | 11.4336 | 0.5745 | 498.8323   |
| o_Clostridiales      | SmallVesselStroke   | MR Egger                  | 15 | 1.1314 | 0.9091 | 1.4081 | 0.2886 | -0.0325 | 0.0185 | 0.1018 | 8.5874  | 0.8565 | 2330.0941  |
| o_Clostridiales      | SmallVesselStroke   | Weighted median           | 15 | 0.9439 | 0.8424 | 1.0576 | 0.3199 | -0.0325 | 0.0185 | 0.1018 | 8.5874  | 0.8565 | 2330.0941  |
| o_Clostridiales      | SmallVesselStroke   | Inverse variance weighted | 15 | 0.9457 | 0.8649 | 1.0340 | 0.2202 | -0.0325 | 0.0185 | 0.1018 | 8.5874  | 0.8565 | 2330.0941  |
| o_Clostridiales      | SmallVesselStroke   | Simple mode               | 15 | 0.9563 | 0.7741 | 1.1812 | 0.6845 | -0.0325 | 0.0185 | 0.1018 | 8.5874  | 0.8565 | 2330.0941  |
| o_Clostridiales      | SmallVesselStroke   | Weighted mode             | 15 | 0.9531 | 0.7991 | 1.1368 | 0.6016 | -0.0325 | 0.0185 | 0.1018 | 8.5874  | 0.8565 | 2330.0941  |
| o_Clostridiales      | Stroke              | MR Egger                  | 16 | 1.0345 | 0.9153 | 1.1691 | 0.5957 | -0.0050 | 0.0101 | 0.6303 | 17.0294 | 0.2546 | 3054.0354  |
| o_Clostridiales      | Stroke              | Weighted median           | 16 | 1.0121 | 0.9542 | 1.0734 | 0.6894 | -0.0050 | 0.0101 | 0.6303 | 17.0294 | 0.2546 | 3054.0354  |
| o_Clostridiales      | Stroke              | Inverse variance weighted | 16 | 1.0056 | 0.9598 | 1.0537 | 0.8132 | -0.0050 | 0.0101 | 0.6303 | 17.0294 | 0.2546 | 3054.0354  |
| o_Clostridiales      | Stroke              | Simple mode               | 16 | 1.0089 | 0.9176 | 1.1094 | 0.8566 | -0.0050 | 0.0101 | 0.6303 | 17.0294 | 0.2546 | 3054.0354  |
| o_Clostridiales      | Stroke              | Weighted mode             | 16 | 1.0132 | 0.9278 | 1.1065 | 0.7741 | -0.0050 | 0.0101 | 0.6303 | 17.0294 | 0.2546 | 3054.0354  |
| o_Erysipelotrichales | CardioEmbolicStroke | MR Egger                  | 12 | 0.8240 | 0.4178 | 1.6253 | 0.5888 | 0.0369  | 0.0563 | 0.5271 | 9.2172  | 0.5116 | 61.8925    |
| o_Erysipelotrichales | CardioEmbolicStroke | Weighted median           | 12 | 0.9752 | 0.7359 | 1.2923 | 0.8612 | 0.0369  | 0.0563 | 0.5271 | 9.2172  | 0.5116 | 61.8925    |
| o_Erysipelotrichales | CardioEmbolicStroke | Inverse variance weighted | 12 | 1.0223 | 0.8260 | 1.2652 | 0.8393 | 0.0369  | 0.0563 | 0.5271 | 9.2172  | 0.5116 | 61.8925    |
| o_Erysipelotrichales | CardioEmbolicStroke | Simple mode               | 12 | 0.9746 | 0.6174 | 1.5384 | 0.9140 | 0.0369  | 0.0563 | 0.5271 | 9.2172  | 0.5116 | 61.8925    |
| o_Erysipelotrichales | CardioEmbolicStroke | Weighted mode             | 12 | 0.9647 | 0.6592 | 1.4117 | 0.8564 | 0.0369  | 0.0563 | 0.5271 | 9.2172  | 0.5116 | 61.8925    |
| o_Erysipelotrichales | IschemicStroke      | MR Egger                  | 24 | 1.0916 | 0.9998 | 1.1919 | 0.0634 | -0.0139 | 0.0095 | 0.1595 | 35.3453 | 0.0480 | -104.6950  |
| o_Erysipelotrichales | IschemicStroke      | Weighted median           | 24 | 1.0473 | 0.9958 | 1.1015 | 0.0725 | -0.0139 | 0.0095 | 0.1595 | 35.3453 | 0.0480 | -104.6950  |
| o_Erysipelotrichales | IschemicStroke      | Inverse variance weighted | 24 | 1.0310 | 0.9870 | 1.0769 | 0.1697 | -0.0139 | 0.0095 | 0.1595 | 35.3453 | 0.0480 | -104.6950  |
| o_Erysipelotrichales | IschemicStroke      | Simple mode               | 24 | 1.0430 | 0.9565 | 1.1373 | 0.3504 | -0.0139 | 0.0095 | 0.1595 | 35.3453 | 0.0480 | -104.6950  |
| o_Erysipelotrichales | IschemicStroke      | Weighted mode             | 24 | 1.0534 | 0.9786 | 1.1339 | 0.1797 | -0.0139 | 0.0095 | 0.1595 | 35.3453 | 0.0480 | -104.6950  |
| o_Erysipelotrichales | LargeArteryStroke   | MR Egger                  | 16 | 0.7668 | 0.5415 | 1.0859 | 0.1569 | 0.0281  | 0.0333 | 0.4128 | 17.5896 | 0.2261 | -2431.1174 |
| o_Erysipelotrichales | LargeArteryStroke   | Weighted median           | 16 | 0.9111 | 0.7549 | 1.0996 | 0.3318 | 0.0281  | 0.0333 | 0.4128 | 17.5896 | 0.2261 | -2431.1174 |
| o_Erysipelotrichales | LargeArteryStroke   | Inverse variance weighted | 16 | 0.8778 | 0.7566 | 1.0184 | 0.0855 | 0.0281  | 0.0333 | 0.4128 | 17.5896 | 0.2261 | -2431.1174 |
| o_Erysipelotrichales | LargeArteryStroke   | Simple mode               | 16 | 1.0173 | 0.6944 | 1.4905 | 0.9310 | 0.0281  | 0.0333 | 0.4128 | 17.5896 | 0.2261 | -2431.1174 |
| o_Erysipelotrichales | LargeArteryStroke   | Weighted mode             | 16 | 0.7540 | 0.5545 | 1.0253 | 0.0919 | 0.0281  | 0.0333 | 0.4128 | 17.5896 | 0.2261 | -2431.1174 |
| o_Erysipelotrichales | SmallVesselStroke   | MR Egger                  | 18 | 1.0542 | 0.9061 | 1.2265 | 0.5041 | -0.0135 | 0.0152 | 0.3886 | 13.0895 | 0.6662 | -394.9599  |
| o_Erysipelotrichales | SmallVesselStroke   | Weighted median           | 18 | 1.0284 | 0.9316 | 1.1352 | 0.5785 | -0.0135 | 0.0152 | 0.3886 | 13.0895 | 0.6662 | -394.9599  |
| o_Erysipelotrichales | SmallVesselStroke   | Inverse variance weighted | 18 | 0.9921 | 0.9251 | 1.0639 | 0.8241 | -0.0135 | 0.0152 | 0.3886 | 13.0895 | 0.6662 | -394.9599  |
| o_Erysipelotrichales | SmallVesselStroke   | Simple mode               | 18 | 1.0323 | 0.8767 | 1.2154 | 0.7079 | -0.0135 | 0.0152 | 0.3886 | 13.0895 | 0.6662 | -394.9599  |
| o_Erysipelotrichales | SmallVesselStroke   | Weighted mode             | 18 | 1.0402 | 0.9074 | 1.1924 | 0.5794 | -0.0135 | 0.0152 | 0.3886 | 13.0895 | 0.6662 | -394.9599  |
| o_Erysipelotrichales | Stroke              | MR Egger                  | 23 | 1.0535 | 0.9758 | 1.1374 | 0.1967 | -0.0078 | 0.0081 | 0.3480 | 30.0360 | 0.1176 | -162.6520  |
| o_Erysipelotrichales | Stroke              | Weighted median           | 23 | 1.0220 | 0.9772 | 1.0689 | 0.3406 | -0.0078 | 0.0081 | 0.3480 | 30.0360 | 0.1176 | -162.6520  |
| o_Erysipelotrichales | Stroke              | Inverse variance weighted | 23 | 1.0192 | 0.9831 | 1.0568 | 0.3014 | -0.0078 | 0.0081 | 0.3480 | 30.0360 | 0.1176 | -162.6520  |
| o_Erysipelotrichales | Stroke              | Simple mode               | 23 | 1.0449 | 0.9479 | 1.1518 | 0.3864 | -0.0078 | 0.0081 | 0.3480 | 30.0360 | 0.1176 | -162.6520  |
| o_Erysipelotrichales | Stroke              | Weighted mode             | 23 | 1.0487 | 0.9731 | 1.1301 | 0.2261 | -0.0078 | 0.0081 | 0.3480 | 30.0360 | 0.1176 | -162.6520  |
| o_Pasteurellales     | CardioEmbolicStroke | MR Egger                  | 5  | 1.1642 | 0.8167 | 1.6596 | 0.4623 | -0.0505 | 0.0878 | 0.6059 | 2.0342  | 0.5653 | -731.6076  |
| o_Pasteurellales     | CardioEmbolicStroke | Weighted median           | 5  | 1.0747 | 0.9212 | 1.2537 | 0.3598 | -0.0505 | 0.0878 | 0.6059 | 2.0342  | 0.5653 | -731.6076  |

|                   |                     |                           |    |        |        |        |        |         |        |        |         |        |            |
|-------------------|---------------------|---------------------------|----|--------|--------|--------|--------|---------|--------|--------|---------|--------|------------|
| o_Pasteurellales  | CardioEmbolicStroke | Inverse variance weighted | 5  | 1.0561 | 0.9339 | 1.1942 | 0.3841 | -0.0505 | 0.0878 | 0.6059 | 2.0342  | 0.5653 | -731.6076  |
| o_Pasteurellales  | CardioEmbolicStroke | Simple mode               | 5  | 1.0753 | 0.8805 | 1.3133 | 0.5157 | -0.0505 | 0.0878 | 0.6059 | 2.0342  | 0.5653 | -731.6076  |
| o_Pasteurellales  | CardioEmbolicStroke | Weighted mode             | 5  | 1.0727 | 0.8950 | 1.2855 | 0.4899 | -0.0505 | 0.0878 | 0.6059 | 2.0342  | 0.5653 | -731.6076  |
| o_Pasteurellales  | IschemicStroke      | MR Egger                  | 8  | 1.0038 | 0.9624 | 1.0470 | 0.8659 | -0.0118 | 0.0129 | 0.3956 | 2.5939  | 0.9199 | -241.8911  |
| o_Pasteurellales  | IschemicStroke      | Weighted median           | 8  | 0.9953 | 0.9672 | 1.0243 | 0.7490 | -0.0118 | 0.0129 | 0.3956 | 2.5939  | 0.9199 | -241.8911  |
| o_Pasteurellales  | IschemicStroke      | Inverse variance weighted | 8  | 0.9869 | 0.9661 | 1.0081 | 0.2238 | -0.0118 | 0.0129 | 0.3956 | 2.5939  | 0.9199 | -241.8911  |
| o_Pasteurellales  | IschemicStroke      | Simple mode               | 8  | 0.9802 | 0.9368 | 1.0256 | 0.4156 | -0.0118 | 0.0129 | 0.3956 | 2.5939  | 0.9199 | -241.8911  |
| o_Pasteurellales  | IschemicStroke      | Weighted mode             | 8  | 0.9945 | 0.9621 | 1.0280 | 0.7521 | -0.0118 | 0.0129 | 0.3956 | 2.5939  | 0.9199 | -241.8911  |
| o_Pasteurellales  | LargeArteryStroke   | MR Egger                  | 7  | 1.0315 | 0.7866 | 1.3527 | 0.8315 | -0.0342 | 0.0697 | 0.6441 | 6.0297  | 0.3033 | -99.8593   |
| o_Pasteurellales  | LargeArteryStroke   | Weighted median           | 7  | 0.9397 | 0.8454 | 1.0444 | 0.2483 | -0.0342 | 0.0697 | 0.6441 | 6.0297  | 0.3033 | -99.8593   |
| o_Pasteurellales  | LargeArteryStroke   | Inverse variance weighted | 7  | 0.9676 | 0.8881 | 1.0543 | 0.4521 | -0.0342 | 0.0697 | 0.6441 | 6.0297  | 0.3033 | -99.8593   |
| o_Pasteurellales  | LargeArteryStroke   | Simple mode               | 7  | 0.9383 | 0.8209 | 1.0725 | 0.3865 | -0.0342 | 0.0697 | 0.6441 | 6.0297  | 0.3033 | -99.8593   |
| o_Pasteurellales  | LargeArteryStroke   | Weighted mode             | 7  | 0.9383 | 0.8330 | 1.0569 | 0.3348 | -0.0342 | 0.0697 | 0.6441 | 6.0297  | 0.3033 | -99.8593   |
| o_Pasteurellales  | SmallVesselStroke   | MR Egger                  | 8  | 0.9451 | 0.8740 | 1.0220 | 0.2067 | 0.0095  | 0.0237 | 0.7006 | 3.5430  | 0.7382 | -58.2303   |
| o_Pasteurellales  | SmallVesselStroke   | Weighted median           | 8  | 0.9609 | 0.9128 | 1.0116 | 0.1282 | 0.0095  | 0.0237 | 0.7006 | 3.5430  | 0.7382 | -58.2303   |
| o_Pasteurellales  | SmallVesselStroke   | Inverse variance weighted | 8  | 0.9584 | 0.9219 | 0.9963 | 0.0319 | 0.0095  | 0.0237 | 0.7006 | 3.5430  | 0.7382 | -58.2303   |
| o_Pasteurellales  | SmallVesselStroke   | Simple mode               | 8  | 0.9307 | 0.8634 | 1.0032 | 0.1026 | 0.0095  | 0.0237 | 0.7006 | 3.5430  | 0.7382 | -58.2303   |
| o_Pasteurellales  | SmallVesselStroke   | Weighted mode             | 8  | 0.9588 | 0.9006 | 1.0207 | 0.2286 | 0.0095  | 0.0237 | 0.7006 | 3.5430  | 0.7382 | -58.2303   |
| o_Pasteurellales  | Stroke              | MR Egger                  | 9  | 1.0140 | 0.9519 | 1.0801 | 0.6796 | -0.0156 | 0.0155 | 0.3471 | 3.7792  | 0.8765 | -639.0668  |
| o_Pasteurellales  | Stroke              | Weighted median           | 9  | 0.9812 | 0.9546 | 1.0086 | 0.1764 | -0.0156 | 0.0155 | 0.3471 | 3.7792  | 0.8765 | -639.0668  |
| o_Pasteurellales  | Stroke              | Inverse variance weighted | 9  | 0.9835 | 0.9625 | 1.0050 | 0.1309 | -0.0156 | 0.0155 | 0.3471 | 3.7792  | 0.8765 | -639.0668  |
| o_Pasteurellales  | Stroke              | Simple mode               | 9  | 0.9737 | 0.9335 | 1.0156 | 0.2505 | -0.0156 | 0.0155 | 0.3471 | 3.7792  | 0.8765 | -639.0668  |
| o_Pasteurellales  | Stroke              | Weighted mode             | 9  | 0.9725 | 0.9366 | 1.0098 | 0.1843 | -0.0156 | 0.0155 | 0.3471 | 3.7792  | 0.8765 | -639.0668  |
| o_Pseudomonadales | CardioEmbolicStroke | MR Egger                  | 10 | 0.9751 | 0.7195 | 1.3215 | 0.8747 | 0.0299  | 0.0666 | 0.6657 | 4.4354  | 0.8159 | -171.8313  |
| o_Pseudomonadales | CardioEmbolicStroke | Weighted median           | 10 | 1.0142 | 0.9076 | 1.1332 | 0.8040 | 0.0299  | 0.0666 | 0.6657 | 4.4354  | 0.8159 | -171.8313  |
| o_Pseudomonadales | CardioEmbolicStroke | Inverse variance weighted | 10 | 1.0425 | 0.9589 | 1.1334 | 0.3287 | 0.0299  | 0.0666 | 0.6657 | 4.4354  | 0.8159 | -171.8313  |
| o_Pseudomonadales | CardioEmbolicStroke | Simple mode               | 10 | 1.0056 | 0.8543 | 1.1836 | 0.9484 | 0.0299  | 0.0666 | 0.6657 | 4.4354  | 0.8159 | -171.8313  |
| o_Pseudomonadales | CardioEmbolicStroke | Weighted mode             | 10 | 0.9965 | 0.8425 | 1.1787 | 0.9682 | 0.0299  | 0.0666 | 0.6657 | 4.4354  | 0.8159 | -171.8313  |
| o_Pseudomonadales | IschemicStroke      | MR Egger                  | 15 | 0.9888 | 0.9501 | 1.0291 | 0.5896 | 0.0015  | 0.0100 | 0.8795 | 4.7357  | 0.9806 | -86.9550   |
| o_Pseudomonadales | IschemicStroke      | Weighted median           | 15 | 0.9889 | 0.9686 | 1.0095 | 0.2884 | 0.0015  | 0.0100 | 0.8795 | 4.7357  | 0.9806 | -86.9550   |
| o_Pseudomonadales | IschemicStroke      | Inverse variance weighted | 15 | 0.9916 | 0.9754 | 1.0082 | 0.3197 | 0.0015  | 0.0100 | 0.8795 | 4.7357  | 0.9806 | -86.9550   |
| o_Pseudomonadales | IschemicStroke      | Simple mode               | 15 | 0.9839 | 0.9510 | 1.0180 | 0.3662 | 0.0015  | 0.0100 | 0.8795 | 4.7357  | 0.9806 | -86.9550   |
| o_Pseudomonadales | IschemicStroke      | Weighted mode             | 15 | 0.9848 | 0.9484 | 1.0226 | 0.4377 | 0.0015  | 0.0100 | 0.8795 | 4.7357  | 0.9806 | -86.9550   |
| o_Pseudomonadales | LargeArteryStroke   | MR Egger                  | 11 | 0.9500 | 0.7633 | 1.1824 | 0.6569 | 0.0238  | 0.0485 | 0.6363 | 5.0538  | 0.8296 | -152.9446  |
| o_Pseudomonadales | LargeArteryStroke   | Weighted median           | 11 | 0.9835 | 0.9074 | 1.0661 | 0.6864 | 0.0238  | 0.0485 | 0.6363 | 5.0538  | 0.8296 | -152.9446  |
| o_Pseudomonadales | LargeArteryStroke   | Inverse variance weighted | 11 | 1.0012 | 0.9416 | 1.0645 | 0.9705 | 0.0238  | 0.0485 | 0.6363 | 5.0538  | 0.8296 | -152.9446  |
| o_Pseudomonadales | LargeArteryStroke   | Simple mode               | 11 | 0.9488 | 0.8398 | 1.0720 | 0.4186 | 0.0238  | 0.0485 | 0.6363 | 5.0538  | 0.8296 | -152.9446  |
| o_Pseudomonadales | LargeArteryStroke   | Weighted mode             | 11 | 0.9565 | 0.8480 | 1.0789 | 0.4856 | 0.0238  | 0.0485 | 0.6363 | 5.0538  | 0.8296 | -152.9446  |
| o_Pseudomonadales | SmallVesselStroke   | MR Egger                  | 11 | 0.9976 | 0.8837 | 1.1262 | 0.9697 | -0.0095 | 0.0269 | 0.7326 | 1.0631  | 0.9993 | -444.5192  |
| o_Pseudomonadales | SmallVesselStroke   | Weighted median           | 11 | 0.9796 | 0.9402 | 1.0207 | 0.3258 | -0.0095 | 0.0269 | 0.7326 | 1.0631  | 0.9993 | -444.5192  |
| o_Pseudomonadales | SmallVesselStroke   | Inverse variance weighted | 11 | 0.9769 | 0.9442 | 1.0107 | 0.1784 | -0.0095 | 0.0269 | 0.7326 | 1.0631  | 0.9993 | -444.5192  |
| o_Pseudomonadales | SmallVesselStroke   | Simple mode               | 11 | 0.9867 | 0.9253 | 1.0522 | 0.6911 | -0.0095 | 0.0269 | 0.7326 | 1.0631  | 0.9993 | -444.5192  |
| o_Pseudomonadales | SmallVesselStroke   | Weighted mode             | 11 | 0.9893 | 0.9325 | 1.0496 | 0.7298 | -0.0095 | 0.0269 | 0.7326 | 1.0631  | 0.9993 | -444.5192  |
| o_Pseudomonadales | Stroke              | MR Egger                  | 16 | 1.0074 | 0.9709 | 1.0453 | 0.7006 | -0.0067 | 0.0090 | 0.4723 | 7.2663  | 0.9240 | -96.1017   |
| o_Pseudomonadales | Stroke              | Weighted median           | 16 | 1.0011 | 0.9826 | 1.0200 | 0.9052 | -0.0067 | 0.0090 | 0.4723 | 7.2663  | 0.9240 | -96.1017   |
| o_Pseudomonadales | Stroke              | Inverse variance weighted | 16 | 0.9946 | 0.9805 | 1.0089 | 0.4556 | -0.0067 | 0.0090 | 0.4723 | 7.2663  | 0.9240 | -96.1017   |
| o_Pseudomonadales | Stroke              | Simple mode               | 16 | 1.0047 | 0.9747 | 1.0358 | 0.7645 | -0.0067 | 0.0090 | 0.4723 | 7.2663  | 0.9240 | -96.1017   |
| o_Pseudomonadales | Stroke              | Weighted mode             | 16 | 1.0045 | 0.9764 | 1.0334 | 0.7613 | -0.0067 | 0.0090 | 0.4723 | 7.2663  | 0.9240 | -96.1017   |
| o_Spirochaetales  | CardioEmbolicStroke | MR Egger                  | 9  | 0.8460 | 0.4854 | 1.4743 | 0.5736 | 0.0801  | 0.0842 | 0.3728 | 11.0756 | 0.1975 | -2675.7342 |
| o_Spirochaetales  | CardioEmbolicStroke | Weighted median           | 9  | 1.0085 | 0.8126 | 1.2516 | 0.9387 | 0.0801  | 0.0842 | 0.3728 | 11.0756 | 0.1975 | -2675.7342 |
| o_Spirochaetales  | CardioEmbolicStroke | Inverse variance weighted | 9  | 1.0898 | 0.9009 | 1.3183 | 0.3758 | 0.0801  | 0.0842 | 0.3728 | 11.0756 | 0.1975 | -2675.7342 |
| o_Spirochaetales  | CardioEmbolicStroke | Simple mode               | 9  | 1.0685 | 0.7511 | 1.5200 | 0.7220 | 0.0801  | 0.0842 | 0.3728 | 11.0756 | 0.1975 | -2675.7342 |
| o_Spirochaetales  | CardioEmbolicStroke | Weighted mode             | 9  | 1.0279 | 0.7784 | 1.3572 | 0.8512 | 0.0801  | 0.0842 | 0.3728 | 11.0756 | 0.1975 | -2675.7342 |

|                  |                     |                           |    |        |        |        |        |         |        |        |         |        |           |
|------------------|---------------------|---------------------------|----|--------|--------|--------|--------|---------|--------|--------|---------|--------|-----------|
| o_Spirochaetales | IschemicStroke      | MR Egger                  | 22 | 0.9961 | 0.9585 | 1.0351 | 0.8441 | -0.0020 | 0.0084 | 0.8155 | 16.6113 | 0.6781 | -43.6415  |
| o_Spirochaetales | IschemicStroke      | Weighted median           | 22 | 0.9982 | 0.9660 | 1.0314 | 0.9128 | -0.0020 | 0.0084 | 0.8155 | 16.6113 | 0.6781 | -43.6415  |
| o_Spirochaetales | IschemicStroke      | Inverse variance weighted | 22 | 0.9923 | 0.9709 | 1.0141 | 0.4862 | -0.0020 | 0.0084 | 0.8155 | 16.6113 | 0.6781 | -43.6415  |
| o_Spirochaetales | IschemicStroke      | Simple mode               | 22 | 0.9953 | 0.9491 | 1.0436 | 0.8463 | -0.0020 | 0.0084 | 0.8155 | 16.6113 | 0.6781 | -43.6415  |
| o_Spirochaetales | IschemicStroke      | Weighted mode             | 22 | 0.9974 | 0.9600 | 1.0363 | 0.8959 | -0.0020 | 0.0084 | 0.8155 | 16.6113 | 0.6781 | -43.6415  |
| o_Spirochaetales | LargeArteryStroke   | MR Egger                  | 13 | 0.8941 | 0.7323 | 1.0916 | 0.2952 | 0.0480  | 0.0414 | 0.2712 | 22.0835 | 0.0366 | -16.0136  |
| o_Spirochaetales | LargeArteryStroke   | Weighted median           | 13 | 0.9110 | 0.8009 | 1.0362 | 0.1561 | 0.0480  | 0.0414 | 0.2712 | 22.0835 | 0.0366 | -16.0136  |
| o_Spirochaetales | LargeArteryStroke   | Inverse variance weighted | 13 | 0.9861 | 0.8808 | 1.1040 | 0.8078 | 0.0480  | 0.0414 | 0.2712 | 22.0835 | 0.0366 | -16.0136  |
| o_Spirochaetales | LargeArteryStroke   | Simple mode               | 13 | 0.8957 | 0.6864 | 1.1689 | 0.4333 | 0.0480  | 0.0414 | 0.2712 | 22.0835 | 0.0366 | -16.0136  |
| o_Spirochaetales | LargeArteryStroke   | Weighted mode             | 13 | 0.8822 | 0.7648 | 1.0177 | 0.1113 | 0.0480  | 0.0414 | 0.2712 | 22.0835 | 0.0366 | -16.0136  |
| o_Spirochaetales | SmallVesselStroke   | MR Egger                  | 15 | 1.0264 | 0.9442 | 1.1159 | 0.5507 | -0.0099 | 0.0174 | 0.5780 | 10.1421 | 0.6823 | -42.7653  |
| o_Spirochaetales | SmallVesselStroke   | Weighted median           | 15 | 1.0160 | 0.9527 | 1.0834 | 0.6290 | -0.0099 | 0.0174 | 0.5780 | 10.1421 | 0.6823 | -42.7653  |
| o_Spirochaetales | SmallVesselStroke   | Inverse variance weighted | 15 | 1.0057 | 0.9611 | 1.0524 | 0.8058 | -0.0099 | 0.0174 | 0.5780 | 10.1421 | 0.6823 | -42.7653  |
| o_Spirochaetales | SmallVesselStroke   | Simple mode               | 15 | 0.9871 | 0.8925 | 1.0917 | 0.8041 | -0.0099 | 0.0174 | 0.5780 | 10.1421 | 0.6823 | -42.7653  |
| o_Spirochaetales | SmallVesselStroke   | Weighted mode             | 15 | 1.0264 | 0.9482 | 1.1111 | 0.5299 | -0.0099 | 0.0174 | 0.5780 | 10.1421 | 0.6823 | -42.7653  |
| o_Spirochaetales | Stroke              | MR Egger                  | 23 | 1.0124 | 0.9736 | 1.0527 | 0.5432 | -0.0084 | 0.0078 | 0.2957 | 22.7102 | 0.4182 | -32.2679  |
| o_Spirochaetales | Stroke              | Weighted median           | 23 | 1.0099 | 0.9801 | 1.0406 | 0.5186 | -0.0084 | 0.0078 | 0.2957 | 22.7102 | 0.4182 | -32.2679  |
| o_Spirochaetales | Stroke              | Inverse variance weighted | 23 | 0.9942 | 0.9738 | 1.0151 | 0.5841 | -0.0084 | 0.0078 | 0.2957 | 22.7102 | 0.4182 | -32.2679  |
| o_Spirochaetales | Stroke              | Simple mode               | 23 | 1.0025 | 0.9562 | 1.0511 | 0.9174 | -0.0084 | 0.0078 | 0.2957 | 22.7102 | 0.4182 | -32.2679  |
| o_Spirochaetales | Stroke              | Weighted mode             | 23 | 1.0084 | 0.9743 | 1.0437 | 0.6381 | -0.0084 | 0.0078 | 0.2957 | 22.7102 | 0.4182 | -32.2679  |
| p_Lentisphaerae  | CardioEmbolicStroke | MR Egger                  | 9  | 1.0240 | 0.7813 | 1.3421 | 0.8687 | -0.0511 | 0.0842 | 0.5628 | 5.1552  | 0.6410 | -37.5760  |
| p_Lentisphaerae  | CardioEmbolicStroke | Weighted median           | 9  | 0.9416 | 0.8552 | 1.0367 | 0.2203 | -0.0511 | 0.0842 | 0.5628 | 5.1552  | 0.6410 | -37.5760  |
| p_Lentisphaerae  | CardioEmbolicStroke | Inverse variance weighted | 9  | 0.9446 | 0.8780 | 1.0162 | 0.1263 | -0.0511 | 0.0842 | 0.5628 | 5.1552  | 0.6410 | -37.5760  |
| p_Lentisphaerae  | CardioEmbolicStroke | Simple mode               | 9  | 0.9210 | 0.7952 | 1.0666 | 0.3036 | -0.0511 | 0.0842 | 0.5628 | 5.1552  | 0.6410 | -37.5760  |
| p_Lentisphaerae  | CardioEmbolicStroke | Weighted mode             | 9  | 0.9240 | 0.8009 | 1.0659 | 0.3097 | -0.0511 | 0.0842 | 0.5628 | 5.1552  | 0.6410 | -37.5760  |
| p_Lentisphaerae  | IschemicStroke      | MR Egger                  | 14 | 1.0066 | 0.9673 | 1.0476 | 0.7505 | -0.0017 | 0.0141 | 0.9056 | 13.2107 | 0.3539 | -36.1372  |
| p_Lentisphaerae  | IschemicStroke      | Weighted median           | 14 | 1.0066 | 0.9872 | 1.0264 | 0.5065 | -0.0017 | 0.0141 | 0.9056 | 13.2107 | 0.3539 | -36.1372  |
| p_Lentisphaerae  | IschemicStroke      | Inverse variance weighted | 14 | 1.0043 | 0.9902 | 1.0187 | 0.5494 | -0.0017 | 0.0141 | 0.9056 | 13.2107 | 0.3539 | -36.1372  |
| p_Lentisphaerae  | IschemicStroke      | Simple mode               | 14 | 1.0066 | 0.9756 | 1.0386 | 0.6865 | -0.0017 | 0.0141 | 0.9056 | 13.2107 | 0.3539 | -36.1372  |
| p_Lentisphaerae  | IschemicStroke      | Weighted mode             | 14 | 1.0026 | 0.9761 | 1.0298 | 0.8509 | -0.0017 | 0.0141 | 0.9056 | 13.2107 | 0.3539 | -36.1372  |
| p_Lentisphaerae  | LargeArteryStroke   | MR Egger                  | 12 | 1.0393 | 0.9148 | 1.1807 | 0.5670 | -0.0130 | 0.0444 | 0.7750 | 7.9423  | 0.6345 | -10.2090  |
| p_Lentisphaerae  | LargeArteryStroke   | Weighted median           | 12 | 0.9981 | 0.9359 | 1.0645 | 0.9535 | -0.0130 | 0.0444 | 0.7750 | 7.9423  | 0.6345 | -10.2090  |
| p_Lentisphaerae  | LargeArteryStroke   | Inverse variance weighted | 12 | 1.0210 | 0.9739 | 1.0704 | 0.3890 | -0.0130 | 0.0444 | 0.7750 | 7.9423  | 0.6345 | -10.2090  |
| p_Lentisphaerae  | LargeArteryStroke   | Simple mode               | 12 | 0.9956 | 0.9075 | 1.0923 | 0.9277 | -0.0130 | 0.0444 | 0.7750 | 7.9423  | 0.6345 | -10.2090  |
| p_Lentisphaerae  | LargeArteryStroke   | Weighted mode             | 12 | 0.9922 | 0.9130 | 1.0781 | 0.8560 | -0.0130 | 0.0444 | 0.7750 | 7.9423  | 0.6345 | -10.2090  |
| p_Lentisphaerae  | SmallVesselStroke   | MR Egger                  | 13 | 0.9939 | 0.9280 | 1.0646 | 0.8652 | 0.0097  | 0.0243 | 0.6982 | 8.3164  | 0.6847 | -29.1027  |
| p_Lentisphaerae  | SmallVesselStroke   | Weighted median           | 13 | 1.0004 | 0.9669 | 1.0351 | 0.9803 | 0.0097  | 0.0243 | 0.6982 | 8.3164  | 0.6847 | -29.1027  |
| p_Lentisphaerae  | SmallVesselStroke   | Inverse variance weighted | 13 | 1.0069 | 0.9813 | 1.0331 | 0.6014 | 0.0097  | 0.0243 | 0.6982 | 8.3164  | 0.6847 | -29.1027  |
| p_Lentisphaerae  | SmallVesselStroke   | Simple mode               | 13 | 0.9874 | 0.9312 | 1.0470 | 0.6798 | 0.0097  | 0.0243 | 0.6982 | 8.3164  | 0.6847 | -29.1027  |
| p_Lentisphaerae  | SmallVesselStroke   | Weighted mode             | 13 | 0.9854 | 0.9369 | 1.0363 | 0.5766 | 0.0097  | 0.0243 | 0.6982 | 8.3164  | 0.6847 | -29.1027  |
| p_Lentisphaerae  | Stroke              | MR Egger                  | 16 | 1.0155 | 0.9790 | 1.0535 | 0.4234 | -0.0093 | 0.0130 | 0.4866 | 18.9353 | 0.1674 | -38.8262  |
| p_Lentisphaerae  | Stroke              | Weighted median           | 16 | 1.0010 | 0.9843 | 1.0179 | 0.9086 | -0.0093 | 0.0130 | 0.4866 | 18.9353 | 0.1674 | -38.8262  |
| p_Lentisphaerae  | Stroke              | Inverse variance weighted | 16 | 1.0030 | 0.9899 | 1.0163 | 0.6575 | -0.0093 | 0.0130 | 0.4866 | 18.9353 | 0.1674 | -38.8262  |
| p_Lentisphaerae  | Stroke              | Simple mode               | 16 | 1.0021 | 0.9767 | 1.0282 | 0.8744 | -0.0093 | 0.0130 | 0.4866 | 18.9353 | 0.1674 | -38.8262  |
| p_Lentisphaerae  | Stroke              | Weighted mode             | 16 | 0.9993 | 0.9754 | 1.0237 | 0.9552 | -0.0093 | 0.0130 | 0.4866 | 18.9353 | 0.1674 | -38.8262  |
| p_Proteobacteria | CardioEmbolicStroke | MR Egger                  | 15 | 0.5904 | 0.4099 | 0.8505 | 0.0142 | 0.1348  | 0.0492 | 0.0168 | 23.0318 | 0.0598 | -103.2246 |
| p_Proteobacteria | CardioEmbolicStroke | Weighted median           | 15 | 0.8595 | 0.7008 | 1.0542 | 0.1462 | 0.1348  | 0.0492 | 0.0168 | 23.0318 | 0.0598 | -103.2246 |
| p_Proteobacteria | CardioEmbolicStroke | Inverse variance weighted | 15 | 0.9425 | 0.7899 | 1.1247 | 0.5116 | 0.1348  | 0.0492 | 0.0168 | 23.0318 | 0.0598 | -103.2246 |
| p_Proteobacteria | CardioEmbolicStroke | Simple mode               | 15 | 0.8514 | 0.5897 | 1.2291 | 0.4049 | 0.1348  | 0.0492 | 0.0168 | 23.0318 | 0.0598 | -103.2246 |
| p_Proteobacteria | CardioEmbolicStroke | Weighted mode             | 15 | 0.8218 | 0.6403 | 1.0547 | 0.1455 | 0.1348  | 0.0492 | 0.0168 | 23.0318 | 0.0598 | -103.2246 |
| p_Proteobacteria | IschemicStroke      | MR Egger                  | 24 | 1.0056 | 0.9448 | 1.0703 | 0.8619 | -0.0056 | 0.0095 | 0.5609 | 23.4593 | 0.3762 | -109.6829 |
| p_Proteobacteria | IschemicStroke      | Weighted median           | 24 | 1.0024 | 0.9628 | 1.0437 | 0.9063 | -0.0056 | 0.0095 | 0.5609 | 23.4593 | 0.3762 | -109.6829 |
| p_Proteobacteria | IschemicStroke      | Inverse variance weighted | 24 | 0.9888 | 0.9624 | 1.0160 | 0.4154 | -0.0056 | 0.0095 | 0.5609 | 23.4593 | 0.3762 | -109.6829 |

|                   |                     |                           |    |        |        |        |        |         |        |        |         |        |           |
|-------------------|---------------------|---------------------------|----|--------|--------|--------|--------|---------|--------|--------|---------|--------|-----------|
| p_Proteobacteria  | IschemicStroke      | Simple mode               | 24 | 1.0235 | 0.9545 | 1.0974 | 0.5207 | -0.0056 | 0.0095 | 0.5609 | 23.4593 | 0.3762 | -109.6829 |
| p_Proteobacteria  | IschemicStroke      | Weighted mode             | 24 | 1.0146 | 0.9640 | 1.0680 | 0.5835 | -0.0056 | 0.0095 | 0.5609 | 23.4593 | 0.3762 | -109.6829 |
| p_Proteobacteria  | LargeArteryStroke   | MR Egger                  | 21 | 1.0071 | 0.7936 | 1.2782 | 0.9539 | -0.0084 | 0.0351 | 0.8126 | 24.1674 | 0.1898 | -31.2701  |
| p_Proteobacteria  | LargeArteryStroke   | Weighted median           | 21 | 0.9011 | 0.7863 | 1.0328 | 0.1347 | -0.0084 | 0.0351 | 0.8126 | 24.1674 | 0.1898 | -31.2701  |
| p_Proteobacteria  | LargeArteryStroke   | Inverse variance weighted | 21 | 0.9809 | 0.8884 | 1.0829 | 0.7018 | -0.0084 | 0.0351 | 0.8126 | 24.1674 | 0.1898 | -31.2701  |
| p_Proteobacteria  | LargeArteryStroke   | Simple mode               | 21 | 0.8245 | 0.6270 | 1.0842 | 0.1824 | -0.0084 | 0.0351 | 0.8126 | 24.1674 | 0.1898 | -31.2701  |
| p_Proteobacteria  | LargeArteryStroke   | Weighted mode             | 21 | 0.8394 | 0.6855 | 1.0279 | 0.1059 | -0.0084 | 0.0351 | 0.8126 | 24.1674 | 0.1898 | -31.2701  |
| p_Proteobacteria  | SmallVesselStroke   | MR Egger                  | 21 | 1.0675 | 0.9490 | 1.2008 | 0.2900 | -0.0139 | 0.0173 | 0.4323 | 17.1784 | 0.5778 | -98.2560  |
| p_Proteobacteria  | SmallVesselStroke   | Weighted median           | 21 | 1.0537 | 0.9797 | 1.1332 | 0.1592 | -0.0139 | 0.0173 | 0.4323 | 17.1784 | 0.5778 | -98.2560  |
| p_Proteobacteria  | SmallVesselStroke   | Inverse variance weighted | 21 | 1.0220 | 0.9721 | 1.0744 | 0.3941 | -0.0139 | 0.0173 | 0.4323 | 17.1784 | 0.5778 | -98.2560  |
| p_Proteobacteria  | SmallVesselStroke   | Simple mode               | 21 | 1.0841 | 0.9533 | 1.2327 | 0.2326 | -0.0139 | 0.0173 | 0.4323 | 17.1784 | 0.5778 | -98.2560  |
| p_Proteobacteria  | SmallVesselStroke   | Weighted mode             | 21 | 1.0678 | 0.9829 | 1.1600 | 0.1364 | -0.0139 | 0.0173 | 0.4323 | 17.1784 | 0.5778 | -98.2560  |
| p_Proteobacteria  | Stroke              | MR Egger                  | 24 | 1.0009 | 0.9450 | 1.0600 | 0.9762 | -0.0044 | 0.0085 | 0.6131 | 23.3155 | 0.3841 | -135.6333 |
| p_Proteobacteria  | Stroke              | Weighted median           | 24 | 0.9923 | 0.9574 | 1.0285 | 0.6737 | -0.0044 | 0.0085 | 0.6131 | 23.3155 | 0.3841 | -135.6333 |
| p_Proteobacteria  | Stroke              | Inverse variance weighted | 24 | 0.9873 | 0.9642 | 1.0110 | 0.2911 | -0.0044 | 0.0085 | 0.6131 | 23.3155 | 0.3841 | -135.6333 |
| p_Proteobacteria  | Stroke              | Simple mode               | 24 | 0.9761 | 0.9176 | 1.0383 | 0.4505 | -0.0044 | 0.0085 | 0.6131 | 23.3155 | 0.3841 | -135.6333 |
| p_Proteobacteria  | Stroke              | Weighted mode             | 24 | 0.9987 | 0.9521 | 1.0475 | 0.9574 | -0.0044 | 0.0085 | 0.6131 | 23.3155 | 0.3841 | -135.6333 |
| p_Synergistetes   | CardioEmbolicStroke | MR Egger                  | 7  | 0.5605 | 0.2483 | 1.2656 | 0.2224 | 0.2421  | 0.2023 | 0.2851 | 14.2643 | 0.0268 | -88.7284  |
| p_Synergistetes   | CardioEmbolicStroke | Weighted median           | 7  | 0.9009 | 0.7885 | 1.0294 | 0.1249 | 0.2421  | 0.2023 | 0.2851 | 14.2643 | 0.0268 | -88.7284  |
| p_Synergistetes   | CardioEmbolicStroke | Inverse variance weighted | 7  | 0.9147 | 0.7905 | 1.0584 | 0.2311 | 0.2421  | 0.2023 | 0.2851 | 14.2643 | 0.0268 | -88.7284  |
| p_Synergistetes   | CardioEmbolicStroke | Simple mode               | 7  | 0.8940 | 0.7462 | 1.0710 | 0.2698 | 0.2421  | 0.2023 | 0.2851 | 14.2643 | 0.0268 | -88.7284  |
| p_Synergistetes   | CardioEmbolicStroke | Weighted mode             | 7  | 0.9043 | 0.7639 | 1.0705 | 0.2867 | 0.2421  | 0.2023 | 0.2851 | 14.2643 | 0.0268 | -88.7284  |
| p_Synergistetes   | IschemicStroke      | MR Egger                  | 12 | 0.9734 | 0.9385 | 1.0097 | 0.1799 | 0.0106  | 0.0116 | 0.3801 | 9.4044  | 0.4942 | -60.1699  |
| p_Synergistetes   | IschemicStroke      | Weighted median           | 12 | 0.9771 | 0.9555 | 0.9991 | 0.0418 | 0.0106  | 0.0116 | 0.3801 | 9.4044  | 0.4942 | -60.1699  |
| p_Synergistetes   | IschemicStroke      | Inverse variance weighted | 12 | 0.9885 | 0.9727 | 1.0046 | 0.1613 | 0.0106  | 0.0116 | 0.3801 | 9.4044  | 0.4942 | -60.1699  |
| p_Synergistetes   | IschemicStroke      | Simple mode               | 12 | 0.9697 | 0.9276 | 1.0138 | 0.2021 | 0.0106  | 0.0116 | 0.3801 | 9.4044  | 0.4942 | -60.1699  |
| p_Synergistetes   | IschemicStroke      | Weighted mode             | 12 | 0.9683 | 0.9293 | 1.0089 | 0.1529 | 0.0106  | 0.0116 | 0.3801 | 9.4044  | 0.4942 | -60.1699  |
| p_Synergistetes   | LargeArteryStroke   | MR Egger                  | 8  | 1.0085 | 0.8404 | 1.2101 | 0.9308 | 0.0144  | 0.0507 | 0.7862 | 4.8011  | 0.5696 | -103.2439 |
| p_Synergistetes   | LargeArteryStroke   | Weighted median           | 8  | 1.0507 | 0.9665 | 1.1423 | 0.2456 | 0.0144  | 0.0507 | 0.7862 | 4.8011  | 0.5696 | -103.2439 |
| p_Synergistetes   | LargeArteryStroke   | Inverse variance weighted | 8  | 1.0338 | 0.9720 | 1.0996 | 0.2907 | 0.0144  | 0.0507 | 0.7862 | 4.8011  | 0.5696 | -103.2439 |
| p_Synergistetes   | LargeArteryStroke   | Simple mode               | 8  | 1.0888 | 0.9564 | 1.2395 | 0.2393 | 0.0144  | 0.0507 | 0.7862 | 4.8011  | 0.5696 | -103.2439 |
| p_Synergistetes   | LargeArteryStroke   | Weighted mode             | 8  | 1.0827 | 0.9562 | 1.2259 | 0.2504 | 0.0144  | 0.0507 | 0.7862 | 4.8011  | 0.5696 | -103.2439 |
| p_Synergistetes   | SmallVesselStroke   | MR Egger                  | 9  | 0.9710 | 0.8966 | 1.0516 | 0.4933 | 0.0288  | 0.0234 | 0.2581 | 5.1183  | 0.7449 | -85.7487  |
| p_Synergistetes   | SmallVesselStroke   | Weighted median           | 9  | 1.0190 | 0.9757 | 1.0642 | 0.3959 | 0.0288  | 0.0234 | 0.2581 | 5.1183  | 0.7449 | -85.7487  |
| p_Synergistetes   | SmallVesselStroke   | Inverse variance weighted | 9  | 1.0166 | 0.9844 | 1.0497 | 0.3160 | 0.0288  | 0.0234 | 0.2581 | 5.1183  | 0.7449 | -85.7487  |
| p_Synergistetes   | SmallVesselStroke   | Simple mode               | 9  | 1.0259 | 0.9579 | 1.0988 | 0.4858 | 0.0288  | 0.0234 | 0.2581 | 5.1183  | 0.7449 | -85.7487  |
| p_Synergistetes   | SmallVesselStroke   | Weighted mode             | 9  | 1.0287 | 0.9537 | 1.1096 | 0.4843 | 0.0288  | 0.0234 | 0.2581 | 5.1183  | 0.7449 | -85.7487  |
| p_Synergistetes   | Stroke              | MR Egger                  | 17 | 0.9892 | 0.9610 | 1.0181 | 0.4704 | 0.0040  | 0.0093 | 0.6744 | 12.6068 | 0.6326 | -55.9224  |
| p_Synergistetes   | Stroke              | Weighted median           | 17 | 0.9946 | 0.9762 | 1.0133 | 0.5707 | 0.0040  | 0.0093 | 0.6744 | 12.6068 | 0.6326 | -55.9224  |
| p_Synergistetes   | Stroke              | Inverse variance weighted | 17 | 0.9948 | 0.9821 | 1.0076 | 0.4221 | 0.0040  | 0.0093 | 0.6744 | 12.6068 | 0.6326 | -55.9224  |
| p_Synergistetes   | Stroke              | Simple mode               | 17 | 0.9830 | 0.9467 | 1.0208 | 0.3861 | 0.0040  | 0.0093 | 0.6744 | 12.6068 | 0.6326 | -55.9224  |
| p_Synergistetes   | Stroke              | Weighted mode             | 17 | 0.9767 | 0.9415 | 1.0131 | 0.2245 | 0.0040  | 0.0093 | 0.6744 | 12.6068 | 0.6326 | -55.9224  |
| p_Verrucomicrobia | CardioEmbolicStroke | MR Egger                  | 10 | 1.0671 | 0.9277 | 1.2273 | 0.3898 | -0.0514 | 0.0476 | 0.3117 | 8.2595  | 0.5082 | -39.8694  |
| p_Verrucomicrobia | CardioEmbolicStroke | Weighted median           | 10 | 0.9989 | 0.9320 | 1.0707 | 0.9758 | -0.0514 | 0.0476 | 0.3117 | 8.2595  | 0.5082 | -39.8694  |
| p_Verrucomicrobia | CardioEmbolicStroke | Inverse variance weighted | 10 | 0.9933 | 0.9432 | 1.0462 | 0.8003 | -0.0514 | 0.0476 | 0.3117 | 8.2595  | 0.5082 | -39.8694  |
| p_Verrucomicrobia | CardioEmbolicStroke | Simple mode               | 10 | 0.9329 | 0.8216 | 1.0593 | 0.3119 | -0.0514 | 0.0476 | 0.3117 | 8.2595  | 0.5082 | -39.8694  |
| p_Verrucomicrobia | CardioEmbolicStroke | Weighted mode             | 10 | 1.0251 | 0.9286 | 1.1315 | 0.6354 | -0.0514 | 0.0476 | 0.3117 | 8.2595  | 0.5082 | -39.8694  |
| p_Verrucomicrobia | IschemicStroke      | MR Egger                  | 14 | 0.9962 | 0.9707 | 1.0225 | 0.7815 | 0.0015  | 0.0098 | 0.8824 | 13.5760 | 0.3286 | -63.4670  |
| p_Verrucomicrobia | IschemicStroke      | Weighted median           | 14 | 0.9939 | 0.9784 | 1.0096 | 0.4444 | 0.0015  | 0.0098 | 0.8824 | 13.5760 | 0.3286 | -63.4670  |
| p_Verrucomicrobia | IschemicStroke      | Inverse variance weighted | 14 | 0.9980 | 0.9873 | 1.0089 | 0.7238 | 0.0015  | 0.0098 | 0.8824 | 13.5760 | 0.3286 | -63.4670  |
| p_Verrucomicrobia | IschemicStroke      | Simple mode               | 14 | 0.9864 | 0.9644 | 1.0090 | 0.2577 | 0.0015  | 0.0098 | 0.8824 | 13.5760 | 0.3286 | -63.4670  |
| p_Verrucomicrobia | IschemicStroke      | Weighted mode             | 14 | 0.9901 | 0.9704 | 1.0101 | 0.3460 | 0.0015  | 0.0098 | 0.8824 | 13.5760 | 0.3286 | -63.4670  |
| p_Verrucomicrobia | LargeArteryStroke   | MR Egger                  | 13 | 0.9664 | 0.8902 | 1.0492 | 0.4326 | 0.0090  | 0.0304 | 0.7719 | 7.8525  | 0.7265 | -24.3714  |

|                              |                     |                           |    |        |        |        |        |         |        |        |         |        |            |
|------------------------------|---------------------|---------------------------|----|--------|--------|--------|--------|---------|--------|--------|---------|--------|------------|
| p_Verrucomicrobia            | LargeArteryStroke   | Weighted median           | 13 | 0.9717 | 0.9245 | 1.0213 | 0.2587 | 0.0090  | 0.0304 | 0.7719 | 7.8525  | 0.7265 | -24.3714   |
| p_Verrucomicrobia            | LargeArteryStroke   | Inverse variance weighted | 13 | 0.9774 | 0.9438 | 1.0122 | 0.1998 | 0.0090  | 0.0304 | 0.7719 | 7.8525  | 0.7265 | -24.3714   |
| p_Verrucomicrobia            | LargeArteryStroke   | Simple mode               | 13 | 0.9434 | 0.8707 | 1.0220 | 0.1792 | 0.0090  | 0.0304 | 0.7719 | 7.8525  | 0.7265 | -24.3714   |
| p_Verrucomicrobia            | LargeArteryStroke   | Weighted mode             | 13 | 0.9586 | 0.8949 | 1.0269 | 0.2520 | 0.0090  | 0.0304 | 0.7719 | 7.8525  | 0.7265 | -24.3714   |
| p_Verrucomicrobia            | SmallVesselStroke   | MR Egger                  | 14 | 1.0069 | 0.9495 | 1.0678 | 0.8218 | -0.0066 | 0.0220 | 0.7697 | 21.3166 | 0.0459 | -20.7929   |
| p_Verrucomicrobia            | SmallVesselStroke   | Weighted median           | 14 | 1.0036 | 0.9751 | 1.0329 | 0.8064 | -0.0066 | 0.0220 | 0.7697 | 21.3166 | 0.0459 | -20.7929   |
| p_Verrucomicrobia            | SmallVesselStroke   | Inverse variance weighted | 14 | 0.9988 | 0.9746 | 1.0236 | 0.9240 | -0.0066 | 0.0220 | 0.7697 | 21.3166 | 0.0459 | -20.7929   |
| p_Verrucomicrobia            | SmallVesselStroke   | Simple mode               | 14 | 1.0120 | 0.9642 | 1.0622 | 0.6374 | -0.0066 | 0.0220 | 0.7697 | 21.3166 | 0.0459 | -20.7929   |
| p_Verrucomicrobia            | SmallVesselStroke   | Weighted mode             | 14 | 1.0067 | 0.9678 | 1.0471 | 0.7449 | -0.0066 | 0.0220 | 0.7697 | 21.3166 | 0.0459 | -20.7929   |
| p_Verrucomicrobia            | Stroke              | MR Egger                  | 14 | 1.0059 | 0.9821 | 1.0303 | 0.6380 | -0.0059 | 0.0089 | 0.5229 | 14.7938 | 0.2529 | -74.3782   |
| p_Verrucomicrobia            | Stroke              | Weighted median           | 14 | 0.9966 | 0.9834 | 1.0100 | 0.6166 | -0.0059 | 0.0089 | 0.5229 | 14.7938 | 0.2529 | -74.3782   |
| p_Verrucomicrobia            | Stroke              | Inverse variance weighted | 14 | 0.9986 | 0.9887 | 1.0086 | 0.7856 | -0.0059 | 0.0089 | 0.5229 | 14.7938 | 0.2529 | -74.3782   |
| p_Verrucomicrobia            | Stroke              | Simple mode               | 14 | 0.9975 | 0.9768 | 1.0188 | 0.8222 | -0.0059 | 0.0089 | 0.5229 | 14.7938 | 0.2529 | -74.3782   |
| p_Verrucomicrobia            | Stroke              | Weighted mode             | 14 | 0.9966 | 0.9784 | 1.0151 | 0.7215 | -0.0059 | 0.0089 | 0.5229 | 14.7938 | 0.2529 | -74.3782   |
| s_Acidaminococcus_fermentans | CardioEmbolicStroke | MR Egger                  | 14 | 1.0466 | 0.8570 | 1.2780 | 0.6633 | 0.0114  | 0.0380 | 0.7701 | 9.4935  | 0.6603 | -43.0848   |
| s_Acidaminococcus_fermentans | CardioEmbolicStroke | Weighted median           | 14 | 1.0894 | 0.9610 | 1.2351 | 0.1808 | 0.0114  | 0.0380 | 0.7701 | 9.4935  | 0.6603 | -43.0848   |
| s_Acidaminococcus_fermentans | CardioEmbolicStroke | Inverse variance weighted | 14 | 1.0757 | 0.9864 | 1.1731 | 0.0990 | 0.0114  | 0.0380 | 0.7701 | 9.4935  | 0.6603 | -43.0848   |
| s_Acidaminococcus_fermentans | CardioEmbolicStroke | Simple mode               | 14 | 1.1384 | 0.9180 | 1.4118 | 0.2589 | 0.0114  | 0.0380 | 0.7701 | 9.4935  | 0.6603 | -43.0848   |
| s_Acidaminococcus_fermentans | CardioEmbolicStroke | Weighted mode             | 14 | 1.1249 | 0.9380 | 1.3490 | 0.2266 | 0.0114  | 0.0380 | 0.7701 | 9.4935  | 0.6603 | -43.0848   |
| s_Acidaminococcus_fermentans | IschemicStroke      | MR Egger                  | 24 | 0.9970 | 0.9691 | 1.0258 | 0.8401 | -0.0007 | 0.0070 | 0.9174 | 27.4125 | 0.1960 | -21.6237   |
| s_Acidaminococcus_fermentans | IschemicStroke      | Weighted median           | 24 | 0.9926 | 0.9704 | 1.0154 | 0.5216 | -0.0007 | 0.0070 | 0.9174 | 27.4125 | 0.1960 | -21.6237   |
| s_Acidaminococcus_fermentans | IschemicStroke      | Inverse variance weighted | 24 | 0.9958 | 0.9798 | 1.0121 | 0.6132 | -0.0007 | 0.0070 | 0.9174 | 27.4125 | 0.1960 | -21.6237   |
| s_Acidaminococcus_fermentans | IschemicStroke      | Simple mode               | 24 | 0.9796 | 0.9398 | 1.0211 | 0.3413 | -0.0007 | 0.0070 | 0.9174 | 27.4125 | 0.1960 | -21.6237   |
| s_Acidaminococcus_fermentans | IschemicStroke      | Weighted mode             | 24 | 0.9824 | 0.9494 | 1.0165 | 0.3182 | -0.0007 | 0.0070 | 0.9174 | 27.4125 | 0.1960 | -21.6237   |
| s_Acidaminococcus_fermentans | LargeArteryStroke   | MR Egger                  | 16 | 1.0287 | 0.8997 | 1.1762 | 0.6855 | -0.0139 | 0.0270 | 0.6151 | 16.2626 | 0.2976 | -17.5684   |
| s_Acidaminococcus_fermentans | LargeArteryStroke   | Weighted median           | 16 | 1.0302 | 0.9450 | 1.1232 | 0.4992 | -0.0139 | 0.0270 | 0.6151 | 16.2626 | 0.2976 | -17.5684   |
| s_Acidaminococcus_fermentans | LargeArteryStroke   | Inverse variance weighted | 16 | 0.9975 | 0.9362 | 1.0628 | 0.9392 | -0.0139 | 0.0270 | 0.6151 | 16.2626 | 0.2976 | -17.5684   |
| s_Acidaminococcus_fermentans | LargeArteryStroke   | Simple mode               | 16 | 1.0262 | 0.8706 | 1.2096 | 0.7620 | -0.0139 | 0.0270 | 0.6151 | 16.2626 | 0.2976 | -17.5684   |
| s_Acidaminococcus_fermentans | LargeArteryStroke   | Weighted mode             | 16 | 1.0198 | 0.8845 | 1.1757 | 0.7913 | -0.0139 | 0.0270 | 0.6151 | 16.2626 | 0.2976 | -17.5684   |
| s_Acidaminococcus_fermentans | SmallVesselStroke   | MR Egger                  | 17 | 0.9790 | 0.9214 | 1.0402 | 0.5034 | 0.0084  | 0.0130 | 0.5275 | 12.0246 | 0.6772 | -32.6004   |
| s_Acidaminococcus_fermentans | SmallVesselStroke   | Weighted median           | 17 | 0.9931 | 0.9488 | 1.0394 | 0.7644 | 0.0084  | 0.0130 | 0.5275 | 12.0246 | 0.6772 | -32.6004   |
| s_Acidaminococcus_fermentans | SmallVesselStroke   | Inverse variance weighted | 17 | 0.9959 | 0.9650 | 1.0278 | 0.7979 | 0.0084  | 0.0130 | 0.5275 | 12.0246 | 0.6772 | -32.6004   |
| s_Acidaminococcus_fermentans | SmallVesselStroke   | Simple mode               | 17 | 0.9808 | 0.9070 | 1.0607 | 0.6343 | 0.0084  | 0.0130 | 0.5275 | 12.0246 | 0.6772 | -32.6004   |
| s_Acidaminococcus_fermentans | SmallVesselStroke   | Weighted mode             | 17 | 0.9879 | 0.9249 | 1.0553 | 0.7230 | 0.0084  | 0.0130 | 0.5275 | 12.0246 | 0.6772 | -32.6004   |
| s_Acidaminococcus_fermentans | Stroke              | MR Egger                  | 24 | 0.9958 | 0.9713 | 1.0210 | 0.7466 | 0.0011  | 0.0060 | 0.8520 | 26.5737 | 0.2279 | -20.1052   |
| s_Acidaminococcus_fermentans | Stroke              | Weighted median           | 24 | 0.9909 | 0.9720 | 1.0101 | 0.3503 | 0.0011  | 0.0060 | 0.8520 | 26.5737 | 0.2279 | -20.1052   |
| s_Acidaminococcus_fermentans | Stroke              | Inverse variance weighted | 24 | 0.9978 | 0.9837 | 1.0121 | 0.7605 | 0.0011  | 0.0060 | 0.8520 | 26.5737 | 0.2279 | -20.1052   |
| s_Acidaminococcus_fermentans | Stroke              | Simple mode               | 24 | 0.9854 | 0.9531 | 1.0188 | 0.3968 | 0.0011  | 0.0060 | 0.8520 | 26.5737 | 0.2279 | -20.1052   |
| s_Acidaminococcus_fermentans | Stroke              | Weighted mode             | 24 | 0.9843 | 0.9572 | 1.0121 | 0.2767 | 0.0011  | 0.0060 | 0.8520 | 26.5737 | 0.2279 | -20.1052   |
| s_Actinomyces_odontolyticus  | CardioEmbolicStroke | MR Egger                  | 12 | 0.7984 | 0.4137 | 1.5409 | 0.5174 | 0.0418  | 0.0868 | 0.6408 | 12.5582 | 0.2494 | -3349.3416 |
| s_Actinomyces_odontolyticus  | CardioEmbolicStroke | Weighted median           | 12 | 0.9572 | 0.7941 | 1.1539 | 0.6464 | 0.0418  | 0.0868 | 0.6408 | 12.5582 | 0.2494 | -3349.3416 |
| s_Actinomyces_odontolyticus  | CardioEmbolicStroke | Inverse variance weighted | 12 | 0.9343 | 0.8091 | 1.0789 | 0.3546 | 0.0418  | 0.0868 | 0.6408 | 12.5582 | 0.2494 | -3349.3416 |
| s_Actinomyces_odontolyticus  | CardioEmbolicStroke | Simple mode               | 12 | 0.9634 | 0.6813 | 1.3625 | 0.8370 | 0.0418  | 0.0868 | 0.6408 | 12.5582 | 0.2494 | -3349.3416 |
| s_Actinomyces_odontolyticus  | CardioEmbolicStroke | Weighted mode             | 12 | 0.9853 | 0.7047 | 1.3776 | 0.9326 | 0.0418  | 0.0868 | 0.6408 | 12.5582 | 0.2494 | -3349.3416 |
| s_Actinomyces_odontolyticus  | IschemicStroke      | MR Egger                  | 22 | 1.0058 | 0.9714 | 1.0415 | 0.7472 | 0.0006  | 0.0066 | 0.9332 | 15.6185 | 0.7400 | -50.2120   |
| s_Actinomyces_odontolyticus  | IschemicStroke      | Weighted median           | 22 | 1.0170 | 0.9881 | 1.0467 | 0.2517 | 0.0006  | 0.0066 | 0.9332 | 15.6185 | 0.7400 | -50.2120   |
| s_Actinomyces_odontolyticus  | IschemicStroke      | Inverse variance weighted | 22 | 1.0071 | 0.9867 | 1.0278 | 0.4990 | 0.0006  | 0.0066 | 0.9332 | 15.6185 | 0.7400 | -50.2120   |
| s_Actinomyces_odontolyticus  | IschemicStroke      | Simple mode               | 22 | 1.0197 | 0.9706 | 1.0713 | 0.4464 | 0.0006  | 0.0066 | 0.9332 | 15.6185 | 0.7400 | -50.2120   |
| s_Actinomyces_odontolyticus  | IschemicStroke      | Weighted mode             | 22 | 1.0248 | 0.9798 | 1.0718 | 0.2969 | 0.0006  | 0.0066 | 0.9332 | 15.6185 | 0.7400 | -50.2120   |
| s_Actinomyces_odontolyticus  | LargeArteryStroke   | MR Egger                  | 16 | 1.0082 | 0.8815 | 1.1532 | 0.9069 | 0.0116  | 0.0232 | 0.6262 | 6.9407  | 0.9370 | -39.1747   |
| s_Actinomyces_odontolyticus  | LargeArteryStroke   | Weighted median           | 16 | 1.0263 | 0.9316 | 1.1306 | 0.5993 | 0.0116  | 0.0232 | 0.6262 | 6.9407  | 0.9370 | -39.1747   |
| s_Actinomyces_odontolyticus  | LargeArteryStroke   | Inverse variance weighted | 16 | 1.0373 | 0.9630 | 1.1173 | 0.3340 | 0.0116  | 0.0232 | 0.6262 | 6.9407  | 0.9370 | -39.1747   |
| s_Actinomyces_odontolyticus  | LargeArteryStroke   | Simple mode               | 16 | 1.0649 | 0.8935 | 1.2691 | 0.4932 | 0.0116  | 0.0232 | 0.6262 | 6.9407  | 0.9370 | -39.1747   |

|                             |                     |                           |    |        |        |        |        |         |        |        |         |        |           |
|-----------------------------|---------------------|---------------------------|----|--------|--------|--------|--------|---------|--------|--------|---------|--------|-----------|
| s_Actinomyces_odontolyticus | LargeArteryStroke   | Weighted mode             | 16 | 1.0212 | 0.9005 | 1.1581 | 0.7481 | 0.0116  | 0.0232 | 0.6262 | 6.9407  | 0.9370 | -39.1747  |
| s_Actinomyces_odontolyticus | SmallVesselStroke   | MR Egger                  | 18 | 1.0183 | 0.9549 | 1.0860 | 0.5876 | -0.0078 | 0.0120 | 0.5224 | 16.0336 | 0.4506 | -25.7394  |
| s_Actinomyces_odontolyticus | SmallVesselStroke   | Weighted median           | 18 | 0.9869 | 0.9358 | 1.0408 | 0.6274 | -0.0078 | 0.0120 | 0.5224 | 16.0336 | 0.4506 | -25.7394  |
| s_Actinomyces_odontolyticus | SmallVesselStroke   | Inverse variance weighted | 18 | 1.0009 | 0.9635 | 1.0397 | 0.9640 | -0.0078 | 0.0120 | 0.5224 | 16.0336 | 0.4506 | -25.7394  |
| s_Actinomyces_odontolyticus | SmallVesselStroke   | Simple mode               | 18 | 0.9634 | 0.8669 | 1.0706 | 0.4976 | -0.0078 | 0.0120 | 0.5224 | 16.0336 | 0.4506 | -25.7394  |
| s_Actinomyces_odontolyticus | SmallVesselStroke   | Weighted mode             | 18 | 1.0277 | 0.9535 | 1.1077 | 0.4848 | -0.0078 | 0.0120 | 0.5224 | 16.0336 | 0.4506 | -25.7394  |
| s_Actinomyces_odontolyticus | Stroke              | MR Egger                  | 21 | 0.9636 | 0.9051 | 1.0259 | 0.2601 | 0.0101  | 0.0094 | 0.2972 | 12.5430 | 0.8961 | -198.7427 |
| s_Actinomyces_odontolyticus | Stroke              | Weighted median           | 21 | 0.9892 | 0.9606 | 1.0187 | 0.4698 | 0.0101  | 0.0094 | 0.2972 | 12.5430 | 0.8961 | -198.7427 |
| s_Actinomyces_odontolyticus | Stroke              | Inverse variance weighted | 21 | 0.9951 | 0.9738 | 1.0168 | 0.6537 | 0.0101  | 0.0094 | 0.2972 | 12.5430 | 0.8961 | -198.7427 |
| s_Actinomyces_odontolyticus | Stroke              | Simple mode               | 21 | 0.9705 | 0.9165 | 1.0278 | 0.3190 | 0.0101  | 0.0094 | 0.2972 | 12.5430 | 0.8961 | -198.7427 |
| s_Actinomyces_odontolyticus | Stroke              | Weighted mode             | 21 | 0.9705 | 0.9191 | 1.0249 | 0.2950 | 0.0101  | 0.0094 | 0.2972 | 12.5430 | 0.8961 | -198.7427 |
| s_Actinomyces_viscosus      | CardioEmbolicStroke | MR Egger                  | 8  | 0.8006 | 0.3298 | 1.9436 | 0.6406 | 0.0816  | 0.1221 | 0.5291 | 1.9374  | 0.9254 | 793.0458  |
| s_Actinomyces_viscosus      | CardioEmbolicStroke | Weighted median           | 8  | 1.0706 | 0.8580 | 1.3359 | 0.5457 | 0.0816  | 0.1221 | 0.5291 | 1.9374  | 0.9254 | 793.0458  |
| s_Actinomyces_viscosus      | CardioEmbolicStroke | Inverse variance weighted | 8  | 1.0769 | 0.9063 | 1.2796 | 0.3998 | 0.0816  | 0.1221 | 0.5291 | 1.9374  | 0.9254 | 793.0458  |
| s_Actinomyces_viscosus      | CardioEmbolicStroke | Simple mode               | 8  | 1.0791 | 0.7920 | 1.4703 | 0.6442 | 0.0816  | 0.1221 | 0.5291 | 1.9374  | 0.9254 | 793.0458  |
| s_Actinomyces_viscosus      | CardioEmbolicStroke | Weighted mode             | 8  | 1.0808 | 0.7931 | 1.4729 | 0.6376 | 0.0816  | 0.1221 | 0.5291 | 1.9374  | 0.9254 | 793.0458  |
| s_Actinomyces_viscosus      | IschemicStroke      | MR Egger                  | 18 | 1.0374 | 0.9891 | 1.0881 | 0.1508 | -0.0132 | 0.0095 | 0.1834 | 13.4467 | 0.7058 | -50.9256  |
| s_Actinomyces_viscosus      | IschemicStroke      | Weighted median           | 18 | 1.0063 | 0.9692 | 1.0448 | 0.7436 | -0.0132 | 0.0095 | 0.1834 | 13.4467 | 0.7058 | -50.9256  |
| s_Actinomyces_viscosus      | IschemicStroke      | Inverse variance weighted | 18 | 1.0082 | 0.9827 | 1.0343 | 0.5322 | -0.0132 | 0.0095 | 0.1834 | 13.4467 | 0.7058 | -50.9256  |
| s_Actinomyces_viscosus      | IschemicStroke      | Simple mode               | 18 | 1.0049 | 0.9422 | 1.0718 | 0.8833 | -0.0132 | 0.0095 | 0.1834 | 13.4467 | 0.7058 | -50.9256  |
| s_Actinomyces_viscosus      | IschemicStroke      | Weighted mode             | 18 | 1.0171 | 0.9674 | 1.0694 | 0.5161 | -0.0132 | 0.0095 | 0.1834 | 13.4467 | 0.7058 | -50.9256  |
| s_Actinomyces_viscosus      | LargeArteryStroke   | MR Egger                  | 12 | 1.0941 | 0.7375 | 1.6232 | 0.6645 | -0.0421 | 0.0591 | 0.4929 | 5.3099  | 0.8695 | -162.0239 |
| s_Actinomyces_viscosus      | LargeArteryStroke   | Weighted median           | 12 | 0.9553 | 0.8204 | 1.1126 | 0.5567 | -0.0421 | 0.0591 | 0.4929 | 5.3099  | 0.8695 | -162.0239 |
| s_Actinomyces_viscosus      | LargeArteryStroke   | Inverse variance weighted | 12 | 0.9539 | 0.8508 | 1.0695 | 0.4190 | -0.0421 | 0.0591 | 0.4929 | 5.3099  | 0.8695 | -162.0239 |
| s_Actinomyces_viscosus      | LargeArteryStroke   | Simple mode               | 12 | 0.9387 | 0.7397 | 1.1914 | 0.6134 | -0.0421 | 0.0591 | 0.4929 | 5.3099  | 0.8695 | -162.0239 |
| s_Actinomyces_viscosus      | LargeArteryStroke   | Weighted mode             | 12 | 0.9442 | 0.7439 | 1.1984 | 0.6463 | -0.0421 | 0.0591 | 0.4929 | 5.3099  | 0.8695 | -162.0239 |
| s_Actinomyces_viscosus      | SmallVesselStroke   | MR Egger                  | 14 | 1.1012 | 0.9796 | 1.2378 | 0.1322 | -0.0165 | 0.0214 | 0.4560 | 16.5038 | 0.1692 | -31.4678  |
| s_Actinomyces_viscosus      | SmallVesselStroke   | Weighted median           | 14 | 1.0976 | 1.0162 | 1.1855 | 0.0178 | -0.0165 | 0.0214 | 0.4560 | 16.5038 | 0.1692 | -31.4678  |
| s_Actinomyces_viscosus      | SmallVesselStroke   | Inverse variance weighted | 14 | 1.0586 | 0.9978 | 1.1231 | 0.0591 | -0.0165 | 0.0214 | 0.4560 | 16.5038 | 0.1692 | -31.4678  |
| s_Actinomyces_viscosus      | SmallVesselStroke   | Simple mode               | 14 | 1.1182 | 0.9958 | 1.2556 | 0.0814 | -0.0165 | 0.0214 | 0.4560 | 16.5038 | 0.1692 | -31.4678  |
| s_Actinomyces_viscosus      | SmallVesselStroke   | Weighted mode             | 14 | 1.1112 | 1.0215 | 1.2089 | 0.0290 | -0.0165 | 0.0214 | 0.4560 | 16.5038 | 0.1692 | -31.4678  |
| s_Actinomyces_viscosus      | Stroke              | MR Egger                  | 18 | 1.0149 | 0.9672 | 1.0650 | 0.5554 | -0.0058 | 0.0089 | 0.5220 | 15.5694 | 0.4834 | -58.4613  |
| s_Actinomyces_viscosus      | Stroke              | Weighted median           | 18 | 1.0101 | 0.9778 | 1.0435 | 0.5429 | -0.0058 | 0.0089 | 0.5220 | 15.5694 | 0.4834 | -58.4613  |
| s_Actinomyces_viscosus      | Stroke              | Inverse variance weighted | 18 | 1.0007 | 0.9777 | 1.0243 | 0.9515 | -0.0058 | 0.0089 | 0.5220 | 15.5694 | 0.4834 | -58.4613  |
| s_Actinomyces_viscosus      | Stroke              | Simple mode               | 18 | 1.0101 | 0.9561 | 1.0671 | 0.7250 | -0.0058 | 0.0089 | 0.5220 | 15.5694 | 0.4834 | -58.4613  |
| s_Actinomyces_viscosus      | Stroke              | Weighted mode             | 18 | 1.0198 | 0.9757 | 1.0658 | 0.3966 | -0.0058 | 0.0089 | 0.5220 | 15.5694 | 0.4834 | -58.4613  |
| s_Alistipes_shahii          | CardioEmbolicStroke | MR Egger                  | 7  | 0.6939 | 0.2620 | 1.8379 | 0.4952 | 0.1895  | 0.1774 | 0.3341 | 9.3921  | 0.1527 | -312.0169 |
| s_Alistipes_shahii          | CardioEmbolicStroke | Weighted median           | 7  | 1.0701 | 0.8861 | 1.2924 | 0.4816 | 0.1895  | 0.1774 | 0.3341 | 9.3921  | 0.1527 | -312.0169 |
| s_Alistipes_shahii          | CardioEmbolicStroke | Inverse variance weighted | 7  | 1.1710 | 0.9898 | 1.3853 | 0.0657 | 0.1895  | 0.1774 | 0.3341 | 9.3921  | 0.1527 | -312.0169 |
| s_Alistipes_shahii          | CardioEmbolicStroke | Simple mode               | 7  | 1.0102 | 0.7627 | 1.3380 | 0.9460 | 0.1895  | 0.1774 | 0.3341 | 9.3921  | 0.1527 | -312.0169 |
| s_Alistipes_shahii          | CardioEmbolicStroke | Weighted mode             | 7  | 1.0273 | 0.7668 | 1.3762 | 0.8629 | 0.1895  | 0.1774 | 0.3341 | 9.3921  | 0.1527 | -312.0169 |
| s_Alistipes_shahii          | IschemicStroke      | MR Egger                  | 12 | 1.0200 | 0.9714 | 1.0711 | 0.4455 | -0.0096 | 0.0130 | 0.4768 | 18.6232 | 0.0453 | -72.3118  |
| s_Alistipes_shahii          | IschemicStroke      | Weighted median           | 12 | 1.0078 | 0.9779 | 1.0385 | 0.6134 | -0.0096 | 0.0130 | 0.4768 | 18.6232 | 0.0453 | -72.3118  |
| s_Alistipes_shahii          | IschemicStroke      | Inverse variance weighted | 12 | 1.0045 | 0.9781 | 1.0317 | 0.7407 | -0.0096 | 0.0130 | 0.4768 | 18.6232 | 0.0453 | -72.3118  |
| s_Alistipes_shahii          | IschemicStroke      | Simple mode               | 12 | 1.0001 | 0.9539 | 1.0485 | 0.9974 | -0.0096 | 0.0130 | 0.4768 | 18.6232 | 0.0453 | -72.3118  |
| s_Alistipes_shahii          | IschemicStroke      | Weighted mode             | 12 | 1.0089 | 0.9762 | 1.0426 | 0.6089 | -0.0096 | 0.0130 | 0.4768 | 18.6232 | 0.0453 | -72.3118  |
| s_Alistipes_shahii          | LargeArteryStroke   | MR Egger                  | 10 | 1.0571 | 0.9124 | 1.2247 | 0.4805 | -0.0219 | 0.0360 | 0.5604 | 9.3971  | 0.3099 | -22.2324  |
| s_Alistipes_shahii          | LargeArteryStroke   | Weighted median           | 10 | 1.0117 | 0.9107 | 1.1238 | 0.8287 | -0.0219 | 0.0360 | 0.5604 | 9.3971  | 0.3099 | -22.2324  |
| s_Alistipes_shahii          | LargeArteryStroke   | Inverse variance weighted | 10 | 1.0168 | 0.9440 | 1.0953 | 0.6597 | -0.0219 | 0.0360 | 0.5604 | 9.3971  | 0.3099 | -22.2324  |
| s_Alistipes_shahii          | LargeArteryStroke   | Simple mode               | 10 | 1.0356 | 0.8856 | 1.2109 | 0.6717 | -0.0219 | 0.0360 | 0.5604 | 9.3971  | 0.3099 | -22.2324  |
| s_Alistipes_shahii          | LargeArteryStroke   | Weighted mode             | 10 | 1.0196 | 0.9222 | 1.1274 | 0.7132 | -0.0219 | 0.0360 | 0.5604 | 9.3971  | 0.3099 | -22.2324  |
| s_Alistipes_shahii          | SmallVesselStroke   | MR Egger                  | 11 | 1.0260 | 0.9264 | 1.1362 | 0.6344 | -0.0197 | 0.0258 | 0.4640 | 19.0453 | 0.0248 | -22.7557  |
| s_Alistipes_shahii          | SmallVesselStroke   | Weighted median           | 11 | 1.0150 | 0.9577 | 1.0758 | 0.6153 | -0.0197 | 0.0258 | 0.4640 | 19.0453 | 0.0248 | -22.7557  |

|                      |                     |                           |    |        |        |        |        |         |        |        |         |        |           |
|----------------------|---------------------|---------------------------|----|--------|--------|--------|--------|---------|--------|--------|---------|--------|-----------|
| s_Alistipes_shahii   | SmallVesselStroke   | Inverse variance weighted | 11 | 0.9922 | 0.9399 | 1.0474 | 0.7762 | -0.0197 | 0.0258 | 0.4640 | 19.0453 | 0.0248 | -22.7557  |
| s_Alistipes_shahii   | SmallVesselStroke   | Simple mode               | 11 | 1.0323 | 0.9356 | 1.1391 | 0.5404 | -0.0197 | 0.0258 | 0.4640 | 19.0453 | 0.0248 | -22.7557  |
| s_Alistipes_shahii   | SmallVesselStroke   | Weighted mode             | 11 | 1.0206 | 0.9576 | 1.0876 | 0.5450 | -0.0197 | 0.0258 | 0.4640 | 19.0453 | 0.0248 | -22.7557  |
| s_Alistipes_shahii   | Stroke              | MR Egger                  | 13 | 1.0441 | 0.9845 | 1.1074 | 0.1780 | -0.0204 | 0.0131 | 0.1472 | 21.8178 | 0.0396 | -73.7559  |
| s_Alistipes_shahii   | Stroke              | Weighted median           | 13 | 1.0089 | 0.9783 | 1.0405 | 0.5734 | -0.0204 | 0.0131 | 0.1472 | 21.8178 | 0.0396 | -73.7559  |
| s_Alistipes_shahii   | Stroke              | Inverse variance weighted | 13 | 1.0010 | 0.9745 | 1.0282 | 0.9439 | -0.0204 | 0.0131 | 0.1472 | 21.8178 | 0.0396 | -73.7559  |
| s_Alistipes_shahii   | Stroke              | Simple mode               | 13 | 1.0156 | 0.9520 | 1.0835 | 0.6477 | -0.0204 | 0.0131 | 0.1472 | 21.8178 | 0.0396 | -73.7559  |
| s_Alistipes_shahii   | Stroke              | Weighted mode             | 13 | 1.0187 | 0.9673 | 1.0729 | 0.4956 | -0.0204 | 0.0131 | 0.1472 | 21.8178 | 0.0396 | -73.7559  |
| s_Bacteroides_caccae | CardioEmbolicStroke | MR Egger                  | 13 | 0.9308 | 0.7920 | 1.0940 | 0.4030 | 0.0648  | 0.0438 | 0.1669 | 9.4604  | 0.6632 | -12.7919  |
| s_Bacteroides_caccae | CardioEmbolicStroke | Weighted median           | 13 | 1.0380 | 0.9369 | 1.1501 | 0.4751 | 0.0648  | 0.0438 | 0.1669 | 9.4604  | 0.6632 | -12.7919  |
| s_Bacteroides_caccae | CardioEmbolicStroke | Inverse variance weighted | 13 | 1.0377 | 0.9642 | 1.1166 | 0.3235 | 0.0648  | 0.0438 | 0.1669 | 9.4604  | 0.6632 | -12.7919  |
| s_Bacteroides_caccae | CardioEmbolicStroke | Simple mode               | 13 | 1.0535 | 0.8905 | 1.2464 | 0.5544 | 0.0648  | 0.0438 | 0.1669 | 9.4604  | 0.6632 | -12.7919  |
| s_Bacteroides_caccae | CardioEmbolicStroke | Weighted mode             | 13 | 1.0453 | 0.9212 | 1.1861 | 0.5048 | 0.0648  | 0.0438 | 0.1669 | 9.4604  | 0.6632 | -12.7919  |
| s_Bacteroides_caccae | IschemicStroke      | MR Egger                  | 15 | 0.9806 | 0.9377 | 1.0254 | 0.4050 | 0.0119  | 0.0122 | 0.3487 | 20.0580 | 0.1283 | -74.5449  |
| s_Bacteroides_caccae | IschemicStroke      | Weighted median           | 15 | 0.9978 | 0.9737 | 1.0224 | 0.8579 | 0.0119  | 0.0122 | 0.3487 | 20.0580 | 0.1283 | -74.5449  |
| s_Bacteroides_caccae | IschemicStroke      | Inverse variance weighted | 15 | 1.0002 | 0.9804 | 1.0204 | 0.9846 | 0.0119  | 0.0122 | 0.3487 | 20.0580 | 0.1283 | -74.5449  |
| s_Bacteroides_caccae | IschemicStroke      | Simple mode               | 15 | 0.9989 | 0.9602 | 1.0391 | 0.9575 | 0.0119  | 0.0122 | 0.3487 | 20.0580 | 0.1283 | -74.5449  |
| s_Bacteroides_caccae | IschemicStroke      | Weighted mode             | 15 | 0.9976 | 0.9705 | 1.0255 | 0.8660 | 0.0119  | 0.0122 | 0.3487 | 20.0580 | 0.1283 | -74.5449  |
| s_Bacteroides_caccae | LargeArteryStroke   | MR Egger                  | 14 | 1.0527 | 0.9345 | 1.1858 | 0.4147 | -0.0274 | 0.0326 | 0.4171 | 10.9453 | 0.5336 | -30.9454  |
| s_Bacteroides_caccae | LargeArteryStroke   | Weighted median           | 14 | 0.9876 | 0.9151 | 1.0659 | 0.7487 | -0.0274 | 0.0326 | 0.4171 | 10.9453 | 0.5336 | -30.9454  |
| s_Bacteroides_caccae | LargeArteryStroke   | Inverse variance weighted | 14 | 1.0058 | 0.9530 | 1.0616 | 0.8327 | -0.0274 | 0.0326 | 0.4171 | 10.9453 | 0.5336 | -30.9454  |
| s_Bacteroides_caccae | LargeArteryStroke   | Simple mode               | 14 | 0.9726 | 0.8583 | 1.1022 | 0.6709 | -0.0274 | 0.0326 | 0.4171 | 10.9453 | 0.5336 | -30.9454  |
| s_Bacteroides_caccae | LargeArteryStroke   | Weighted mode             | 14 | 0.9726 | 0.8844 | 1.0696 | 0.5770 | -0.0274 | 0.0326 | 0.4171 | 10.9453 | 0.5336 | -30.9454  |
| s_Bacteroides_caccae | SmallVesselStroke   | MR Egger                  | 14 | 0.9273 | 0.8419 | 1.0213 | 0.1513 | 0.0380  | 0.0263 | 0.1743 | 29.5970 | 0.0054 | -42.3992  |
| s_Bacteroides_caccae | SmallVesselStroke   | Weighted median           | 14 | 0.9821 | 0.9394 | 1.0267 | 0.4245 | 0.0380  | 0.0263 | 0.1743 | 29.5970 | 0.0054 | -42.3992  |
| s_Bacteroides_caccae | SmallVesselStroke   | Inverse variance weighted | 14 | 0.9881 | 0.9442 | 1.0339 | 0.6037 | 0.0380  | 0.0263 | 0.1743 | 29.5970 | 0.0054 | -42.3992  |
| s_Bacteroides_caccae | SmallVesselStroke   | Simple mode               | 14 | 0.9675 | 0.9028 | 1.0368 | 0.3660 | 0.0380  | 0.0263 | 0.1743 | 29.5970 | 0.0054 | -42.3992  |
| s_Bacteroides_caccae | SmallVesselStroke   | Weighted mode             | 14 | 0.9743 | 0.9323 | 1.0181 | 0.2664 | 0.0380  | 0.0263 | 0.1743 | 29.5970 | 0.0054 | -42.3992  |
| s_Bacteroides_caccae | Stroke              | MR Egger                  | 15 | 0.9865 | 0.9288 | 1.0478 | 0.6663 | 0.0067  | 0.0144 | 0.6502 | 16.5436 | 0.2210 | -137.6981 |
| s_Bacteroides_caccae | Stroke              | Weighted median           | 15 | 0.9981 | 0.9738 | 1.0230 | 0.8801 | 0.0067  | 0.0144 | 0.6502 | 16.5436 | 0.2210 | -137.6981 |
| s_Bacteroides_caccae | Stroke              | Inverse variance weighted | 15 | 1.0000 | 0.9820 | 1.0183 | 0.9997 | 0.0067  | 0.0144 | 0.6502 | 16.5436 | 0.2210 | -137.6981 |
| s_Bacteroides_caccae | Stroke              | Simple mode               | 15 | 1.0327 | 0.9859 | 1.0817 | 0.1951 | 0.0067  | 0.0144 | 0.6502 | 16.5436 | 0.2210 | -137.6981 |
| s_Bacteroides_caccae | Stroke              | Weighted mode             | 15 | 0.9968 | 0.9612 | 1.0338 | 0.8670 | 0.0067  | 0.0144 | 0.6502 | 16.5436 | 0.2210 | -137.6981 |
| s_Bacteroides_clarus | CardioEmbolicStroke | MR Egger                  | 6  | 0.8287 | 0.5468 | 1.2558 | 0.4257 | 0.0385  | 0.0984 | 0.7154 | 12.3259 | 0.0151 | -29.0364  |
| s_Bacteroides_clarus | CardioEmbolicStroke | Weighted median           | 6  | 0.9075 | 0.7617 | 1.0813 | 0.2777 | 0.0385  | 0.0984 | 0.7154 | 12.3259 | 0.0151 | -29.0364  |
| s_Bacteroides_clarus | CardioEmbolicStroke | Inverse variance weighted | 6  | 0.8907 | 0.7385 | 1.0743 | 0.2261 | 0.0385  | 0.0984 | 0.7154 | 12.3259 | 0.0151 | -29.0364  |
| s_Bacteroides_clarus | CardioEmbolicStroke | Simple mode               | 6  | 1.0508 | 0.7380 | 1.4962 | 0.7944 | 0.0385  | 0.0984 | 0.7154 | 12.3259 | 0.0151 | -29.0364  |
| s_Bacteroides_clarus | CardioEmbolicStroke | Weighted mode             | 6  | 0.8810 | 0.7016 | 1.1062 | 0.3250 | 0.0385  | 0.0984 | 0.7154 | 12.3259 | 0.0151 | -29.0364  |
| s_Bacteroides_clarus | IschemicStroke      | MR Egger                  | 12 | 0.9933 | 0.9590 | 1.0287 | 0.7137 | 0.0052  | 0.0104 | 0.6251 | 9.0155  | 0.5306 | -36.0477  |
| s_Bacteroides_clarus | IschemicStroke      | Weighted median           | 12 | 0.9957 | 0.9700 | 1.0220 | 0.7444 | 0.0052  | 0.0104 | 0.6251 | 9.0155  | 0.5306 | -36.0477  |
| s_Bacteroides_clarus | IschemicStroke      | Inverse variance weighted | 12 | 1.0007 | 0.9809 | 1.0208 | 0.9483 | 0.0052  | 0.0104 | 0.6251 | 9.0155  | 0.5306 | -36.0477  |
| s_Bacteroides_clarus | IschemicStroke      | Simple mode               | 12 | 0.9940 | 0.9629 | 1.0262 | 0.7197 | 0.0052  | 0.0104 | 0.6251 | 9.0155  | 0.5306 | -36.0477  |
| s_Bacteroides_clarus | IschemicStroke      | Weighted mode             | 12 | 0.9970 | 0.9691 | 1.0258 | 0.8409 | 0.0052  | 0.0104 | 0.6251 | 9.0155  | 0.5306 | -36.0477  |
| s_Bacteroides_clarus | LargeArteryStroke   | MR Egger                  | 9  | 0.9533 | 0.8516 | 1.0672 | 0.4337 | 0.0140  | 0.0337 | 0.6904 | 2.0496  | 0.9570 | -37.3773  |
| s_Bacteroides_clarus | LargeArteryStroke   | Weighted median           | 9  | 0.9733 | 0.8972 | 1.0558 | 0.5140 | 0.0140  | 0.0337 | 0.6904 | 2.0496  | 0.9570 | -37.3773  |
| s_Bacteroides_clarus | LargeArteryStroke   | Inverse variance weighted | 9  | 0.9718 | 0.9087 | 1.0393 | 0.4037 | 0.0140  | 0.0337 | 0.6904 | 2.0496  | 0.9570 | -37.3773  |
| s_Bacteroides_clarus | LargeArteryStroke   | Simple mode               | 9  | 0.9975 | 0.8851 | 1.1243 | 0.9689 | 0.0140  | 0.0337 | 0.6904 | 2.0496  | 0.9570 | -37.3773  |
| s_Bacteroides_clarus | LargeArteryStroke   | Weighted mode             | 9  | 0.9782 | 0.8766 | 1.0916 | 0.7045 | 0.0140  | 0.0337 | 0.6904 | 2.0496  | 0.9570 | -37.3773  |
| s_Bacteroides_clarus | SmallVesselStroke   | MR Egger                  | 10 | 1.0328 | 0.9695 | 1.1003 | 0.3459 | -0.0147 | 0.0188 | 0.4582 | 8.0852  | 0.4252 | -18.1903  |
| s_Bacteroides_clarus | SmallVesselStroke   | Weighted median           | 10 | 1.0208 | 0.9716 | 1.0725 | 0.4130 | -0.0147 | 0.0188 | 0.4582 | 8.0852  | 0.4252 | -18.1903  |
| s_Bacteroides_clarus | SmallVesselStroke   | Inverse variance weighted | 10 | 1.0121 | 0.9752 | 1.0504 | 0.5260 | -0.0147 | 0.0188 | 0.4582 | 8.0852  | 0.4252 | -18.1903  |
| s_Bacteroides_clarus | SmallVesselStroke   | Simple mode               | 10 | 1.0267 | 0.9625 | 1.0951 | 0.4447 | -0.0147 | 0.0188 | 0.4582 | 8.0852  | 0.4252 | -18.1903  |
| s_Bacteroides_clarus | SmallVesselStroke   | Weighted mode             | 10 | 1.0254 | 0.9733 | 1.0802 | 0.3708 | -0.0147 | 0.0188 | 0.4582 | 8.0852  | 0.4252 | -18.1903  |

|                           |                     |                           |    |        |        |        |        |         |        |        |         |        |            |
|---------------------------|---------------------|---------------------------|----|--------|--------|--------|--------|---------|--------|--------|---------|--------|------------|
| s_Bacteroides_clarus      | Stroke              | MR Egger                  | 10 | 0.9833 | 0.9390 | 1.0297 | 0.4950 | 0.0070  | 0.0112 | 0.5511 | 5.8292  | 0.6664 | -198.3295  |
| s_Bacteroides_clarus      | Stroke              | Weighted median           | 10 | 1.0031 | 0.9765 | 1.0304 | 0.8210 | 0.0070  | 0.0112 | 0.5511 | 5.8292  | 0.6664 | -198.3295  |
| s_Bacteroides_clarus      | Stroke              | Inverse variance weighted | 10 | 0.9962 | 0.9753 | 1.0175 | 0.7241 | 0.0070  | 0.0112 | 0.5511 | 5.8292  | 0.6664 | -198.3295  |
| s_Bacteroides_clarus      | Stroke              | Simple mode               | 10 | 1.0079 | 0.9672 | 1.0503 | 0.7171 | 0.0070  | 0.0112 | 0.5511 | 5.8292  | 0.6664 | -198.3295  |
| s_Bacteroides_clarus      | Stroke              | Weighted mode             | 10 | 1.0058 | 0.9731 | 1.0397 | 0.7377 | 0.0070  | 0.0112 | 0.5511 | 5.8292  | 0.6664 | -198.3295  |
| s_Bacteroides_coprocola   | CardioEmbolicStroke | MR Egger                  | 8  | 1.2490 | 0.6187 | 2.5215 | 0.5578 | -0.0923 | 0.1333 | 0.5143 | 6.0610  | 0.4164 | -1429.5021 |
| s_Bacteroides_coprocola   | CardioEmbolicStroke | Weighted median           | 8  | 0.9093 | 0.7830 | 1.0559 | 0.2126 | -0.0923 | 0.1333 | 0.5143 | 6.0610  | 0.4164 | -1429.5021 |
| s_Bacteroides_coprocola   | CardioEmbolicStroke | Inverse variance weighted | 8  | 0.9774 | 0.8749 | 1.0919 | 0.6860 | -0.0923 | 0.1333 | 0.5143 | 6.0610  | 0.4164 | -1429.5021 |
| s_Bacteroides_coprocola   | CardioEmbolicStroke | Simple mode               | 8  | 0.8859 | 0.6949 | 1.1293 | 0.3605 | -0.0923 | 0.1333 | 0.5143 | 6.0610  | 0.4164 | -1429.5021 |
| s_Bacteroides_coprocola   | CardioEmbolicStroke | Weighted mode             | 8  | 0.8832 | 0.6950 | 1.1225 | 0.3437 | -0.0923 | 0.1333 | 0.5143 | 6.0610  | 0.4164 | -1429.5021 |
| s_Bacteroides_coprocola   | IschemicStroke      | MR Egger                  | 13 | 0.9514 | 0.8765 | 1.0328 | 0.2596 | 0.0153  | 0.0171 | 0.3912 | 13.6443 | 0.2533 | -207.5026  |
| s_Bacteroides_coprocola   | IschemicStroke      | Weighted median           | 13 | 0.9830 | 0.9548 | 1.0121 | 0.2491 | 0.0153  | 0.0171 | 0.3912 | 13.6443 | 0.2533 | -207.5026  |
| s_Bacteroides_coprocola   | IschemicStroke      | Inverse variance weighted | 13 | 0.9862 | 0.9641 | 1.0088 | 0.2303 | 0.0153  | 0.0171 | 0.3912 | 13.6443 | 0.2533 | -207.5026  |
| s_Bacteroides_coprocola   | IschemicStroke      | Simple mode               | 13 | 0.9926 | 0.9402 | 1.0479 | 0.7923 | 0.0153  | 0.0171 | 0.3912 | 13.6443 | 0.2533 | -207.5026  |
| s_Bacteroides_coprocola   | IschemicStroke      | Weighted mode             | 13 | 0.9766 | 0.9281 | 1.0276 | 0.3793 | 0.0153  | 0.0171 | 0.3912 | 13.6443 | 0.2533 | -207.5026  |
| s_Bacteroides_coprocola   | LargeArteryStroke   | MR Egger                  | 9  | 0.8441 | 0.4150 | 1.7169 | 0.6541 | 0.0652  | 0.1365 | 0.6475 | 18.2953 | 0.0107 | -150.1878  |
| s_Bacteroides_coprocola   | LargeArteryStroke   | Weighted median           | 9  | 1.0819 | 0.9560 | 1.2243 | 0.2123 | 0.0652  | 0.1365 | 0.6475 | 18.2953 | 0.0107 | -150.1878  |
| s_Bacteroides_coprocola   | LargeArteryStroke   | Inverse variance weighted | 9  | 1.0005 | 0.8826 | 1.1342 | 0.9937 | 0.0652  | 0.1365 | 0.6475 | 18.2953 | 0.0107 | -150.1878  |
| s_Bacteroides_coprocola   | LargeArteryStroke   | Simple mode               | 9  | 1.1108 | 0.8907 | 1.3854 | 0.3782 | 0.0652  | 0.1365 | 0.6475 | 18.2953 | 0.0107 | -150.1878  |
| s_Bacteroides_coprocola   | LargeArteryStroke   | Weighted mode             | 9  | 1.1317 | 0.9469 | 1.3526 | 0.2108 | 0.0652  | 0.1365 | 0.6475 | 18.2953 | 0.0107 | -150.1878  |
| s_Bacteroides_coprocola   | SmallVesselStroke   | MR Egger                  | 9  | 0.8911 | 0.6991 | 1.1358 | 0.3825 | 0.0358  | 0.0467 | 0.4683 | 1.6323  | 0.9903 | -1126.5217 |
| s_Bacteroides_coprocola   | SmallVesselStroke   | Weighted median           | 9  | 0.9741 | 0.9185 | 1.0332 | 0.3827 | 0.0358  | 0.0467 | 0.4683 | 1.6323  | 0.9903 | -1126.5217 |
| s_Bacteroides_coprocola   | SmallVesselStroke   | Inverse variance weighted | 9  | 0.9782 | 0.9351 | 1.0233 | 0.3372 | 0.0358  | 0.0467 | 0.4683 | 1.6323  | 0.9903 | -1126.5217 |
| s_Bacteroides_coprocola   | SmallVesselStroke   | Simple mode               | 9  | 0.9629 | 0.8871 | 1.0452 | 0.3931 | 0.0358  | 0.0467 | 0.4683 | 1.6323  | 0.9903 | -1126.5217 |
| s_Bacteroides_coprocola   | SmallVesselStroke   | Weighted mode             | 9  | 0.9641 | 0.8905 | 1.0438 | 0.3931 | 0.0358  | 0.0467 | 0.4683 | 1.6323  | 0.9903 | -1126.5217 |
| s_Bacteroides_coprocola   | Stroke              | MR Egger                  | 15 | 0.9737 | 0.9082 | 1.0439 | 0.4659 | 0.0104  | 0.0144 | 0.4809 | 17.3892 | 0.1821 | -192.8118  |
| s_Bacteroides_coprocola   | Stroke              | Weighted median           | 15 | 0.9879 | 0.9628 | 1.0137 | 0.3540 | 0.0104  | 0.0144 | 0.4809 | 17.3892 | 0.1821 | -192.8118  |
| s_Bacteroides_coprocola   | Stroke              | Inverse variance weighted | 15 | 0.9980 | 0.9789 | 1.0175 | 0.8428 | 0.0104  | 0.0144 | 0.4809 | 17.3892 | 0.1821 | -192.8118  |
| s_Bacteroides_coprocola   | Stroke              | Simple mode               | 15 | 0.9784 | 0.9337 | 1.0253 | 0.3759 | 0.0104  | 0.0144 | 0.4809 | 17.3892 | 0.1821 | -192.8118  |
| s_Bacteroides_coprocola   | Stroke              | Weighted mode             | 15 | 0.9755 | 0.9332 | 1.0197 | 0.2905 | 0.0104  | 0.0144 | 0.4809 | 17.3892 | 0.1821 | -192.8118  |
| s_Bacteroides_coprophilus | CardioEmbolicStroke | MR Egger                  | 5  | 1.0072 | 0.2809 | 3.6111 | 0.9919 | 0.0118  | 0.2250 | 0.9615 | 9.5262  | 0.0231 | 204.8405   |
| s_Bacteroides_coprophilus | CardioEmbolicStroke | Weighted median           | 5  | 0.9152 | 0.7445 | 1.1251 | 0.4004 | 0.0118  | 0.2250 | 0.9615 | 9.5262  | 0.0231 | 204.8405   |
| s_Bacteroides_coprophilus | CardioEmbolicStroke | Inverse variance weighted | 5  | 1.0413 | 0.8147 | 1.3309 | 0.7466 | 0.0118  | 0.2250 | 0.9615 | 9.5262  | 0.0231 | 204.8405   |
| s_Bacteroides_coprophilus | CardioEmbolicStroke | Simple mode               | 5  | 0.9049 | 0.7158 | 1.1440 | 0.4505 | 0.0118  | 0.2250 | 0.9615 | 9.5262  | 0.0231 | 204.8405   |
| s_Bacteroides_coprophilus | CardioEmbolicStroke | Weighted mode             | 5  | 0.9065 | 0.7242 | 1.1347 | 0.4398 | 0.0118  | 0.2250 | 0.9615 | 9.5262  | 0.0231 | 204.8405   |
| s_Bacteroides_coprophilus | IschemicStroke      | MR Egger                  | 16 | 0.9885 | 0.9510 | 1.0275 | 0.5685 | 0.0002  | 0.0103 | 0.9877 | 14.3097 | 0.4269 | -46.0788   |
| s_Bacteroides_coprophilus | IschemicStroke      | Weighted median           | 16 | 0.9819 | 0.9536 | 1.0110 | 0.2192 | 0.0002  | 0.0103 | 0.9877 | 14.3097 | 0.4269 | -46.0788   |
| s_Bacteroides_coprophilus | IschemicStroke      | Inverse variance weighted | 16 | 0.9888 | 0.9688 | 1.0092 | 0.2804 | 0.0002  | 0.0103 | 0.9877 | 14.3097 | 0.4269 | -46.0788   |
| s_Bacteroides_coprophilus | IschemicStroke      | Simple mode               | 16 | 0.9927 | 0.9514 | 1.0358 | 0.7410 | 0.0002  | 0.0103 | 0.9877 | 14.3097 | 0.4269 | -46.0788   |
| s_Bacteroides_coprophilus | IschemicStroke      | Weighted mode             | 16 | 0.9800 | 0.9411 | 1.0205 | 0.3439 | 0.0002  | 0.0103 | 0.9877 | 14.3097 | 0.4269 | -46.0788   |
| s_Bacteroides_coprophilus | LargeArteryStroke   | MR Egger                  | 9  | 1.1841 | 0.9103 | 1.5402 | 0.2482 | -0.0641 | 0.0545 | 0.2776 | 6.9936  | 0.5373 | -66.4890   |
| s_Bacteroides_coprophilus | LargeArteryStroke   | Weighted median           | 9  | 0.9955 | 0.8809 | 1.1250 | 0.9424 | -0.0641 | 0.0545 | 0.2776 | 6.9936  | 0.5373 | -66.4890   |
| s_Bacteroides_coprophilus | LargeArteryStroke   | Inverse variance weighted | 9  | 1.0218 | 0.9298 | 1.1230 | 0.6540 | -0.0641 | 0.0545 | 0.2776 | 6.9936  | 0.5373 | -66.4890   |
| s_Bacteroides_coprophilus | LargeArteryStroke   | Simple mode               | 9  | 0.9578 | 0.7905 | 1.1606 | 0.6717 | -0.0641 | 0.0545 | 0.2776 | 6.9936  | 0.5373 | -66.4890   |
| s_Bacteroides_coprophilus | LargeArteryStroke   | Weighted mode             | 9  | 0.9731 | 0.8166 | 1.1597 | 0.7684 | -0.0641 | 0.0545 | 0.2776 | 6.9936  | 0.5373 | -66.4890   |
| s_Bacteroides_coprophilus | SmallVesselStroke   | MR Egger                  | 10 | 0.8788 | 0.7668 | 1.0072 | 0.1004 | 0.0447  | 0.0290 | 0.1615 | 7.5955  | 0.5754 | -121.3338  |
| s_Bacteroides_coprophilus | SmallVesselStroke   | Weighted median           | 10 | 0.9589 | 0.8956 | 1.0266 | 0.2278 | 0.0447  | 0.0290 | 0.1615 | 7.5955  | 0.5754 | -121.3338  |
| s_Bacteroides_coprophilus | SmallVesselStroke   | Inverse variance weighted | 10 | 0.9708 | 0.9227 | 1.0215 | 0.2539 | 0.0447  | 0.0290 | 0.1615 | 7.5955  | 0.5754 | -121.3338  |
| s_Bacteroides_coprophilus | SmallVesselStroke   | Simple mode               | 10 | 0.9331 | 0.8266 | 1.0532 | 0.2911 | 0.0447  | 0.0290 | 0.1615 | 7.5955  | 0.5754 | -121.3338  |
| s_Bacteroides_coprophilus | SmallVesselStroke   | Weighted mode             | 10 | 0.9312 | 0.8385 | 1.0342 | 0.2156 | 0.0447  | 0.0290 | 0.1615 | 7.5955  | 0.5754 | -121.3338  |
| s_Bacteroides_coprophilus | Stroke              | MR Egger                  | 16 | 1.0075 | 0.9631 | 1.0539 | 0.7513 | -0.0030 | 0.0106 | 0.7798 | 15.1593 | 0.3673 | -70.7598   |
| s_Bacteroides_coprophilus | Stroke              | Weighted median           | 16 | 1.0013 | 0.9734 | 1.0300 | 0.9273 | -0.0030 | 0.0106 | 0.7798 | 15.1593 | 0.3673 | -70.7598   |
| s_Bacteroides_coprophilus | Stroke              | Inverse variance weighted | 16 | 1.0016 | 0.9815 | 1.0222 | 0.8750 | -0.0030 | 0.0106 | 0.7798 | 15.1593 | 0.3673 | -70.7598   |

|                           |                     |                           |    |        |        |        |        |         |        |        |         |        |           |
|---------------------------|---------------------|---------------------------|----|--------|--------|--------|--------|---------|--------|--------|---------|--------|-----------|
| s_Bacteroides_coprophilus | Stroke              | Simple mode               | 16 | 1.0182 | 0.9727 | 1.0659 | 0.4509 | -0.0030 | 0.0106 | 0.7798 | 15.1593 | 0.3673 | -70.7598  |
| s_Bacteroides_coprophilus | Stroke              | Weighted mode             | 16 | 0.9925 | 0.9532 | 1.0335 | 0.7210 | -0.0030 | 0.0106 | 0.7798 | 15.1593 | 0.3673 | -70.7598  |
| s_Bacteroides_dorei       | CardioEmbolicStroke | MR Egger                  | 7  | 0.6040 | 0.3040 | 1.2001 | 0.2096 | 0.0754  | 0.1101 | 0.5241 | 12.4355 | 0.0293 | 264.3595  |
| s_Bacteroides_dorei       | CardioEmbolicStroke | Weighted median           | 7  | 0.6901 | 0.5529 | 0.8614 | 0.0010 | 0.0754  | 0.1101 | 0.5241 | 12.4355 | 0.0293 | 264.3595  |
| s_Bacteroides_dorei       | CardioEmbolicStroke | Inverse variance weighted | 7  | 0.7552 | 0.5954 | 0.9580 | 0.0207 | 0.0754  | 0.1101 | 0.5241 | 12.4355 | 0.0293 | 264.3595  |
| s_Bacteroides_dorei       | CardioEmbolicStroke | Simple mode               | 7  | 0.7053 | 0.5238 | 0.9498 | 0.0612 | 0.0754  | 0.1101 | 0.5241 | 12.4355 | 0.0293 | 264.3595  |
| s_Bacteroides_dorei       | CardioEmbolicStroke | Weighted mode             | 7  | 0.6983 | 0.5453 | 0.8943 | 0.0294 | 0.0754  | 0.1101 | 0.5241 | 12.4355 | 0.0293 | 264.3595  |
| s_Bacteroides_dorei       | IschemicStroke      | MR Egger                  | 12 | 1.0127 | 0.9516 | 1.0776 | 0.6995 | -0.0063 | 0.0118 | 0.6048 | 10.4775 | 0.3996 | -192.8664 |
| s_Bacteroides_dorei       | IschemicStroke      | Weighted median           | 12 | 1.0007 | 0.9599 | 1.0431 | 0.9751 | -0.0063 | 0.0118 | 0.6048 | 10.4775 | 0.3996 | -192.8664 |
| s_Bacteroides_dorei       | IschemicStroke      | Inverse variance weighted | 12 | 0.9978 | 0.9689 | 1.0275 | 0.8815 | -0.0063 | 0.0118 | 0.6048 | 10.4775 | 0.3996 | -192.8664 |
| s_Bacteroides_dorei       | IschemicStroke      | Simple mode               | 12 | 0.9864 | 0.9281 | 1.0485 | 0.6690 | -0.0063 | 0.0118 | 0.6048 | 10.4775 | 0.3996 | -192.8664 |
| s_Bacteroides_dorei       | IschemicStroke      | Weighted mode             | 12 | 0.9912 | 0.9443 | 1.0404 | 0.7269 | -0.0063 | 0.0118 | 0.6048 | 10.4775 | 0.3996 | -192.8664 |
| s_Bacteroides_dorei       | LargeArteryStroke   | MR Egger                  | 9  | 0.7045 | 0.5688 | 0.8727 | 0.0149 | 0.1216  | 0.0410 | 0.0209 | 20.1787 | 0.0097 | -31.6766  |
| s_Bacteroides_dorei       | LargeArteryStroke   | Weighted median           | 9  | 0.9734 | 0.8333 | 1.1371 | 0.7339 | 0.1216  | 0.0410 | 0.0209 | 20.1787 | 0.0097 | -31.6766  |
| s_Bacteroides_dorei       | LargeArteryStroke   | Inverse variance weighted | 9  | 0.9311 | 0.7989 | 1.0852 | 0.3609 | 0.1216  | 0.0410 | 0.0209 | 20.1787 | 0.0097 | -31.6766  |
| s_Bacteroides_dorei       | LargeArteryStroke   | Simple mode               | 9  | 1.0547 | 0.8222 | 1.3529 | 0.6864 | 0.1216  | 0.0410 | 0.0209 | 20.1787 | 0.0097 | -31.6766  |
| s_Bacteroides_dorei       | LargeArteryStroke   | Weighted mode             | 9  | 1.0299 | 0.8235 | 1.2880 | 0.8026 | 0.1216  | 0.0410 | 0.0209 | 20.1787 | 0.0097 | -31.6766  |
| s_Bacteroides_dorei       | SmallVesselStroke   | MR Egger                  | 10 | 0.9982 | 0.8920 | 1.1171 | 0.9763 | 0.0184  | 0.0210 | 0.4070 | 4.8410  | 0.7744 | -235.8742 |
| s_Bacteroides_dorei       | SmallVesselStroke   | Weighted median           | 10 | 1.0331 | 0.9630 | 1.1084 | 0.3637 | 0.0184  | 0.0210 | 0.4070 | 4.8410  | 0.7744 | -235.8742 |
| s_Bacteroides_dorei       | SmallVesselStroke   | Inverse variance weighted | 10 | 1.0430 | 0.9873 | 1.1018 | 0.1327 | 0.0184  | 0.0210 | 0.4070 | 4.8410  | 0.7744 | -235.8742 |
| s_Bacteroides_dorei       | SmallVesselStroke   | Simple mode               | 10 | 1.0488 | 0.9460 | 1.1628 | 0.3885 | 0.0184  | 0.0210 | 0.4070 | 4.8410  | 0.7744 | -235.8742 |
| s_Bacteroides_dorei       | SmallVesselStroke   | Weighted mode             | 10 | 1.0410 | 0.9589 | 1.1301 | 0.3628 | 0.0184  | 0.0210 | 0.4070 | 4.8410  | 0.7744 | -235.8742 |
| s_Bacteroides_dorei       | Stroke              | MR Egger                  | 13 | 1.0233 | 0.9597 | 1.0910 | 0.4965 | -0.0083 | 0.0117 | 0.4944 | 16.0046 | 0.1410 | -168.6924 |
| s_Bacteroides_dorei       | Stroke              | Weighted median           | 13 | 1.0068 | 0.9704 | 1.0446 | 0.7184 | -0.0083 | 0.0117 | 0.4944 | 16.0046 | 0.1410 | -168.6924 |
| s_Bacteroides_dorei       | Stroke              | Inverse variance weighted | 13 | 1.0027 | 0.9731 | 1.0331 | 0.8606 | -0.0083 | 0.0117 | 0.4944 | 16.0046 | 0.1410 | -168.6924 |
| s_Bacteroides_dorei       | Stroke              | Simple mode               | 13 | 0.9906 | 0.9293 | 1.0560 | 0.7772 | -0.0083 | 0.0117 | 0.4944 | 16.0046 | 0.1410 | -168.6924 |
| s_Bacteroides_dorei       | Stroke              | Weighted mode             | 13 | 0.9837 | 0.9358 | 1.0340 | 0.5300 | -0.0083 | 0.0117 | 0.4944 | 16.0046 | 0.1410 | -168.6924 |
| s_Bacteroides_eggerthii   | CardioEmbolicStroke | MR Egger                  | 7  | 0.8451 | 0.6115 | 1.1680 | 0.3548 | 0.0184  | 0.0714 | 0.8072 | 8.6193  | 0.1252 | -62.6845  |
| s_Bacteroides_eggerthii   | CardioEmbolicStroke | Weighted median           | 7  | 0.9298 | 0.7794 | 1.1092 | 0.4189 | 0.0184  | 0.0714 | 0.8072 | 8.6193  | 0.1252 | -62.6845  |
| s_Bacteroides_eggerthii   | CardioEmbolicStroke | Inverse variance weighted | 7  | 0.8771 | 0.7595 | 1.0129 | 0.0741 | 0.0184  | 0.0714 | 0.8072 | 8.6193  | 0.1252 | -62.6845  |
| s_Bacteroides_eggerthii   | CardioEmbolicStroke | Simple mode               | 7  | 1.0271 | 0.7531 | 1.4008 | 0.8715 | 0.0184  | 0.0714 | 0.8072 | 8.6193  | 0.1252 | -62.6845  |
| s_Bacteroides_eggerthii   | CardioEmbolicStroke | Weighted mode             | 7  | 0.9951 | 0.8119 | 1.2197 | 0.9638 | 0.0184  | 0.0714 | 0.8072 | 8.6193  | 0.1252 | -62.6845  |
| s_Bacteroides_eggerthii   | IschemicStroke      | MR Egger                  | 14 | 1.0042 | 0.9549 | 1.0560 | 0.8735 | -0.0043 | 0.0125 | 0.7365 | 14.2346 | 0.2860 | -45.6360  |
| s_Bacteroides_eggerthii   | IschemicStroke      | Weighted median           | 14 | 0.9855 | 0.9524 | 1.0197 | 0.4021 | -0.0043 | 0.0125 | 0.7365 | 14.2346 | 0.2860 | -45.6360  |
| s_Bacteroides_eggerthii   | IschemicStroke      | Inverse variance weighted | 14 | 0.9965 | 0.9724 | 1.0213 | 0.7822 | -0.0043 | 0.0125 | 0.7365 | 14.2346 | 0.2860 | -45.6360  |
| s_Bacteroides_eggerthii   | IschemicStroke      | Simple mode               | 14 | 0.9705 | 0.9176 | 1.0264 | 0.3134 | -0.0043 | 0.0125 | 0.7365 | 14.2346 | 0.2860 | -45.6360  |
| s_Bacteroides_eggerthii   | IschemicStroke      | Weighted mode             | 14 | 0.9806 | 0.9440 | 1.0186 | 0.3305 | -0.0043 | 0.0125 | 0.7365 | 14.2346 | 0.2860 | -45.6360  |
| s_Bacteroides_eggerthii   | LargeArteryStroke   | MR Egger                  | 9  | 1.0429 | 0.8781 | 1.2385 | 0.6470 | -0.0414 | 0.0397 | 0.3316 | 4.6476  | 0.7945 | -83.6121  |
| s_Bacteroides_eggerthii   | LargeArteryStroke   | Weighted median           | 9  | 0.9805 | 0.8773 | 1.0959 | 0.7292 | -0.0414 | 0.0397 | 0.3316 | 4.6476  | 0.7945 | -83.6121  |
| s_Bacteroides_eggerthii   | LargeArteryStroke   | Inverse variance weighted | 9  | 0.9628 | 0.8853 | 1.0472 | 0.3771 | -0.0414 | 0.0397 | 0.3316 | 4.6476  | 0.7945 | -83.6121  |
| s_Bacteroides_eggerthii   | LargeArteryStroke   | Simple mode               | 9  | 0.9898 | 0.8523 | 1.1495 | 0.8963 | -0.0414 | 0.0397 | 0.3316 | 4.6476  | 0.7945 | -83.6121  |
| s_Bacteroides_eggerthii   | LargeArteryStroke   | Weighted mode             | 9  | 0.9841 | 0.8717 | 1.1109 | 0.8022 | -0.0414 | 0.0397 | 0.3316 | 4.6476  | 0.7945 | -83.6121  |
| s_Bacteroides_eggerthii   | SmallVesselStroke   | MR Egger                  | 10 | 0.9832 | 0.9013 | 1.0726 | 0.7133 | 0.0183  | 0.0210 | 0.4077 | 4.8513  | 0.7733 | -96.5632  |
| s_Bacteroides_eggerthii   | SmallVesselStroke   | Weighted median           | 10 | 1.0226 | 0.9662 | 1.0822 | 0.4403 | 0.0183  | 0.0210 | 0.4077 | 4.8513  | 0.7733 | -96.5632  |
| s_Bacteroides_eggerthii   | SmallVesselStroke   | Inverse variance weighted | 10 | 1.0166 | 0.9725 | 1.0627 | 0.4661 | 0.0183  | 0.0210 | 0.4077 | 4.8513  | 0.7733 | -96.5632  |
| s_Bacteroides_eggerthii   | SmallVesselStroke   | Simple mode               | 10 | 1.0312 | 0.9421 | 1.1287 | 0.5223 | 0.0183  | 0.0210 | 0.4077 | 4.8513  | 0.7733 | -96.5632  |
| s_Bacteroides_eggerthii   | SmallVesselStroke   | Weighted mode             | 10 | 1.0182 | 0.9417 | 1.1009 | 0.6613 | 0.0183  | 0.0210 | 0.4077 | 4.8513  | 0.7733 | -96.5632  |
| s_Bacteroides_eggerthii   | Stroke              | MR Egger                  | 13 | 0.9794 | 0.9309 | 1.0304 | 0.4385 | 0.0042  | 0.0120 | 0.7321 | 15.4105 | 0.1645 | -97.0408  |
| s_Bacteroides_eggerthii   | Stroke              | Weighted median           | 13 | 0.9816 | 0.9519 | 1.0123 | 0.2375 | 0.0042  | 0.0120 | 0.7321 | 15.4105 | 0.1645 | -97.0408  |
| s_Bacteroides_eggerthii   | Stroke              | Inverse variance weighted | 13 | 0.9872 | 0.9637 | 1.0112 | 0.2930 | 0.0042  | 0.0120 | 0.7321 | 15.4105 | 0.1645 | -97.0408  |
| s_Bacteroides_eggerthii   | Stroke              | Simple mode               | 13 | 0.9827 | 0.9370 | 1.0305 | 0.4847 | 0.0042  | 0.0120 | 0.7321 | 15.4105 | 0.1645 | -97.0408  |
| s_Bacteroides_eggerthii   | Stroke              | Weighted mode             | 13 | 0.9802 | 0.9461 | 1.0155 | 0.2899 | 0.0042  | 0.0120 | 0.7321 | 15.4105 | 0.1645 | -97.0408  |
| s_Bacteroides_finegoldii  | CardioEmbolicStroke | MR Egger                  | 9  | 0.5540 | 0.2730 | 1.1244 | 0.1460 | 0.1425  | 0.0915 | 0.1632 | 6.3099  | 0.6126 | 725.3163  |

|                          |                     |                           |    |        |        |        |        |         |        |        |         |        |            |
|--------------------------|---------------------|---------------------------|----|--------|--------|--------|--------|---------|--------|--------|---------|--------|------------|
| s_Bacteroides_finegoldii | CardioEmbolicStroke | Weighted median           | 9  | 0.9824 | 0.8044 | 1.2000 | 0.8622 | 0.1425  | 0.0915 | 0.1632 | 6.3099  | 0.6126 | 725.3163   |
| s_Bacteroides_finegoldii | CardioEmbolicStroke | Inverse variance weighted | 9  | 0.9599 | 0.8252 | 1.1165 | 0.5953 | 0.1425  | 0.0915 | 0.1632 | 6.3099  | 0.6126 | 725.3163   |
| s_Bacteroides_finegoldii | CardioEmbolicStroke | Simple mode               | 9  | 0.9682 | 0.7151 | 1.3110 | 0.8397 | 0.1425  | 0.0915 | 0.1632 | 6.3099  | 0.6126 | 725.3163   |
| s_Bacteroides_finegoldii | CardioEmbolicStroke | Weighted mode             | 9  | 0.9658 | 0.7006 | 1.3312 | 0.8368 | 0.1425  | 0.0915 | 0.1632 | 6.3099  | 0.6126 | 725.3163   |
| s_Bacteroides_finegoldii | IschemicStroke      | MR Egger                  | 11 | 0.9993 | 0.8840 | 1.1296 | 0.9911 | -0.0022 | 0.0171 | 0.9003 | 15.5469 | 0.0770 | -394.0135  |
| s_Bacteroides_finegoldii | IschemicStroke      | Weighted median           | 11 | 0.9761 | 0.9336 | 1.0205 | 0.2864 | -0.0022 | 0.0171 | 0.9003 | 15.5469 | 0.0770 | -394.0135  |
| s_Bacteroides_finegoldii | IschemicStroke      | Inverse variance weighted | 11 | 0.9917 | 0.9530 | 1.0321 | 0.6834 | -0.0022 | 0.0171 | 0.9003 | 15.5469 | 0.0770 | -394.0135  |
| s_Bacteroides_finegoldii | IschemicStroke      | Simple mode               | 11 | 0.9460 | 0.8784 | 1.0188 | 0.1731 | -0.0022 | 0.0171 | 0.9003 | 15.5469 | 0.0770 | -394.0135  |
| s_Bacteroides_finegoldii | IschemicStroke      | Weighted mode             | 11 | 0.9474 | 0.8786 | 1.0216 | 0.1907 | -0.0022 | 0.0171 | 0.9003 | 15.5469 | 0.0770 | -394.0135  |
| s_Bacteroides_finegoldii | LargeArteryStroke   | MR Egger                  | 9  | 0.7327 | 0.4369 | 1.2289 | 0.2771 | 0.0695  | 0.0672 | 0.3354 | 4.6399  | 0.7953 | 1127.3721  |
| s_Bacteroides_finegoldii | LargeArteryStroke   | Weighted median           | 9  | 0.9263 | 0.7949 | 1.0793 | 0.3262 | 0.0695  | 0.0672 | 0.3354 | 4.6399  | 0.7953 | 1127.3721  |
| s_Bacteroides_finegoldii | LargeArteryStroke   | Inverse variance weighted | 9  | 0.9564 | 0.8547 | 1.0702 | 0.4369 | 0.0695  | 0.0672 | 0.3354 | 4.6399  | 0.7953 | 1127.3721  |
| s_Bacteroides_finegoldii | LargeArteryStroke   | Simple mode               | 9  | 0.9187 | 0.7309 | 1.1547 | 0.4881 | 0.0695  | 0.0672 | 0.3354 | 4.6399  | 0.7953 | 1127.3721  |
| s_Bacteroides_finegoldii | LargeArteryStroke   | Weighted mode             | 9  | 0.9155 | 0.7323 | 1.1447 | 0.4610 | 0.0695  | 0.0672 | 0.3354 | 4.6399  | 0.7953 | 1127.3721  |
| s_Bacteroides_finegoldii | SmallVesselStroke   | MR Egger                  | 9  | 1.1001 | 0.7841 | 1.5434 | 0.5981 | -0.0257 | 0.0438 | 0.5759 | 9.3313  | 0.2297 | 3080.1298  |
| s_Bacteroides_finegoldii | SmallVesselStroke   | Weighted median           | 9  | 1.0098 | 0.9253 | 1.1019 | 0.8270 | -0.0257 | 0.0438 | 0.5759 | 9.3313  | 0.2297 | 3080.1298  |
| s_Bacteroides_finegoldii | SmallVesselStroke   | Inverse variance weighted | 9  | 0.9964 | 0.9295 | 1.0681 | 0.9184 | -0.0257 | 0.0438 | 0.5759 | 9.3313  | 0.2297 | 3080.1298  |
| s_Bacteroides_finegoldii | SmallVesselStroke   | Simple mode               | 9  | 1.0260 | 0.8933 | 1.1785 | 0.7257 | -0.0257 | 0.0438 | 0.5759 | 9.3313  | 0.2297 | 3080.1298  |
| s_Bacteroides_finegoldii | SmallVesselStroke   | Weighted mode             | 9  | 1.0238 | 0.8940 | 1.1724 | 0.7426 | -0.0257 | 0.0438 | 0.5759 | 9.3313  | 0.2297 | 3080.1298  |
| s_Bacteroides_finegoldii | Stroke              | MR Egger                  | 11 | 0.9432 | 0.8355 | 1.0648 | 0.3689 | 0.0148  | 0.0164 | 0.3893 | 12.5298 | 0.1851 | -1798.2567 |
| s_Bacteroides_finegoldii | Stroke              | Weighted median           | 11 | 0.9773 | 0.9412 | 1.0147 | 0.2310 | 0.0148  | 0.0164 | 0.3893 | 12.5298 | 0.1851 | -1798.2567 |
| s_Bacteroides_finegoldii | Stroke              | Inverse variance weighted | 11 | 0.9953 | 0.9629 | 1.0288 | 0.7794 | 0.0148  | 0.0164 | 0.3893 | 12.5298 | 0.1851 | -1798.2567 |
| s_Bacteroides_finegoldii | Stroke              | Simple mode               | 11 | 0.9689 | 0.9096 | 1.0320 | 0.3493 | 0.0148  | 0.0164 | 0.3893 | 12.5298 | 0.1851 | -1798.2567 |
| s_Bacteroides_finegoldii | Stroke              | Weighted mode             | 11 | 0.9695 | 0.9132 | 1.0292 | 0.3339 | 0.0148  | 0.0164 | 0.3893 | 12.5298 | 0.1851 | -1798.2567 |
| s_Bacteroides_fluxus     | CardioEmbolicStroke | MR Egger                  | 6  | 0.7254 | 0.2299 | 2.2881 | 0.6130 | 0.0472  | 0.1427 | 0.7577 | 4.1477  | 0.3864 | 58.4933    |
| s_Bacteroides_fluxus     | CardioEmbolicStroke | Weighted median           | 6  | 0.8118 | 0.6236 | 1.0567 | 0.1211 | 0.0472  | 0.1427 | 0.7577 | 4.1477  | 0.3864 | 58.4933    |
| s_Bacteroides_fluxus     | CardioEmbolicStroke | Inverse variance weighted | 6  | 0.8775 | 0.7141 | 1.0782 | 0.2137 | 0.0472  | 0.1427 | 0.7577 | 4.1477  | 0.3864 | 58.4933    |
| s_Bacteroides_fluxus     | CardioEmbolicStroke | Simple mode               | 6  | 0.7357 | 0.4663 | 1.1605 | 0.2441 | 0.0472  | 0.1427 | 0.7577 | 4.1477  | 0.3864 | 58.4933    |
| s_Bacteroides_fluxus     | CardioEmbolicStroke | Weighted mode             | 6  | 0.7429 | 0.4832 | 1.1421 | 0.2336 | 0.0472  | 0.1427 | 0.7577 | 4.1477  | 0.3864 | 58.4933    |
| s_Bacteroides_fluxus     | IschemicStroke      | MR Egger                  | 9  | 1.1010 | 0.8938 | 1.3562 | 0.3958 | -0.0319 | 0.0274 | 0.2819 | 10.3714 | 0.2399 | 27554.6391 |
| s_Bacteroides_fluxus     | IschemicStroke      | Weighted median           | 9  | 0.9858 | 0.9289 | 1.0462 | 0.6377 | -0.0319 | 0.0274 | 0.2819 | 10.3714 | 0.2399 | 27554.6391 |
| s_Bacteroides_fluxus     | IschemicStroke      | Inverse variance weighted | 9  | 0.9758 | 0.9293 | 1.0247 | 0.3256 | -0.0319 | 0.0274 | 0.2819 | 10.3714 | 0.2399 | 27554.6391 |
| s_Bacteroides_fluxus     | IschemicStroke      | Simple mode               | 9  | 0.9930 | 0.9001 | 1.0955 | 0.8924 | -0.0319 | 0.0274 | 0.2819 | 10.3714 | 0.2399 | 27554.6391 |
| s_Bacteroides_fluxus     | IschemicStroke      | Weighted mode             | 9  | 0.9960 | 0.9053 | 1.0958 | 0.9368 | -0.0319 | 0.0274 | 0.2819 | 10.3714 | 0.2399 | 27554.6391 |
| s_Bacteroides_fluxus     | LargeArteryStroke   | MR Egger                  | 7  | 0.9990 | 0.3991 | 2.5010 | 0.9984 | -0.0096 | 0.1158 | 0.9370 | 6.8779  | 0.2299 | 112.6359   |
| s_Bacteroides_fluxus     | LargeArteryStroke   | Weighted median           | 7  | 1.0715 | 0.8828 | 1.3006 | 0.4849 | -0.0096 | 0.1158 | 0.9370 | 6.8779  | 0.2299 | 112.6359   |
| s_Bacteroides_fluxus     | LargeArteryStroke   | Inverse variance weighted | 7  | 0.9616 | 0.8201 | 1.1276 | 0.6298 | -0.0096 | 0.1158 | 0.9370 | 6.8779  | 0.2299 | 112.6359   |
| s_Bacteroides_fluxus     | LargeArteryStroke   | Simple mode               | 7  | 1.1073 | 0.8260 | 1.4844 | 0.5208 | -0.0096 | 0.1158 | 0.9370 | 6.8779  | 0.2299 | 112.6359   |
| s_Bacteroides_fluxus     | LargeArteryStroke   | Weighted mode             | 7  | 1.0985 | 0.8405 | 1.4357 | 0.5173 | -0.0096 | 0.1158 | 0.9370 | 6.8779  | 0.2299 | 112.6359   |
| s_Bacteroides_fluxus     | SmallVesselStroke   | MR Egger                  | 7  | 1.2744 | 0.6339 | 2.5620 | 0.5265 | -0.0825 | 0.0884 | 0.3931 | 15.7071 | 0.0154 | 213.3616   |
| s_Bacteroides_fluxus     | SmallVesselStroke   | Weighted median           | 7  | 0.9501 | 0.8407 | 1.0737 | 0.4120 | -0.0825 | 0.0884 | 0.3931 | 15.7071 | 0.0154 | 213.3616   |
| s_Bacteroides_fluxus     | SmallVesselStroke   | Inverse variance weighted | 7  | 0.9193 | 0.8048 | 1.0500 | 0.2145 | -0.0825 | 0.0884 | 0.3931 | 15.7071 | 0.0154 | 213.3616   |
| s_Bacteroides_fluxus     | SmallVesselStroke   | Simple mode               | 7  | 0.8008 | 0.6243 | 1.0272 | 0.1309 | -0.0825 | 0.0884 | 0.3931 | 15.7071 | 0.0154 | 213.3616   |
| s_Bacteroides_fluxus     | SmallVesselStroke   | Weighted mode             | 7  | 1.0463 | 0.8504 | 1.2875 | 0.6836 | -0.0825 | 0.0884 | 0.3931 | 15.7071 | 0.0154 | 213.3616   |
| s_Bacteroides_fluxus     | Stroke              | MR Egger                  | 11 | 0.9789 | 0.8949 | 1.0707 | 0.6516 | 0.0002  | 0.0130 | 0.9875 | 7.1534  | 0.6211 | -712.7865  |
| s_Bacteroides_fluxus     | Stroke              | Weighted median           | 11 | 0.9741 | 0.9323 | 1.0177 | 0.2405 | 0.0002  | 0.0130 | 0.9875 | 7.1534  | 0.6211 | -712.7865  |
| s_Bacteroides_fluxus     | Stroke              | Inverse variance weighted | 11 | 0.9795 | 0.9485 | 1.0116 | 0.2080 | 0.0002  | 0.0130 | 0.9875 | 7.1534  | 0.6211 | -712.7865  |
| s_Bacteroides_fluxus     | Stroke              | Simple mode               | 11 | 0.9746 | 0.9107 | 1.0430 | 0.4741 | 0.0002  | 0.0130 | 0.9875 | 7.1534  | 0.6211 | -712.7865  |
| s_Bacteroides_fluxus     | Stroke              | Weighted mode             | 11 | 0.9770 | 0.9187 | 1.0391 | 0.4770 | 0.0002  | 0.0130 | 0.9875 | 7.1534  | 0.6211 | -712.7865  |
| s_Bacteroides_fragilis   | CardioEmbolicStroke | MR Egger                  | 8  | 0.7857 | 0.3198 | 1.9301 | 0.6178 | 0.0220  | 0.1437 | 0.8832 | 13.4278 | 0.0367 | 4844.3026  |
| s_Bacteroides_fragilis   | CardioEmbolicStroke | Weighted median           | 8  | 0.8961 | 0.7288 | 1.1020 | 0.2986 | 0.0220  | 0.1437 | 0.8832 | 13.4278 | 0.0367 | 4844.3026  |
| s_Bacteroides_fragilis   | CardioEmbolicStroke | Inverse variance weighted | 8  | 0.8415 | 0.6997 | 1.0119 | 0.0666 | 0.0220  | 0.1437 | 0.8832 | 13.4278 | 0.0367 | 4844.3026  |
| s_Bacteroides_fragilis   | CardioEmbolicStroke | Simple mode               | 8  | 0.9397 | 0.6555 | 1.3472 | 0.7451 | 0.0220  | 0.1437 | 0.8832 | 13.4278 | 0.0367 | 4844.3026  |

|                            |                     |                           |    |        |        |        |        |         |        |        |         |        |            |
|----------------------------|---------------------|---------------------------|----|--------|--------|--------|--------|---------|--------|--------|---------|--------|------------|
| s_Bacteroides_fragilis     | CardioEmbolicStroke | Weighted mode             | 8  | 0.9397 | 0.6893 | 1.2811 | 0.7059 | 0.0220  | 0.1437 | 0.8832 | 13.4278 | 0.0367 | 4844.3026  |
| s_Bacteroides_fragilis     | IschemicStroke      | MR Egger                  | 13 | 0.9738 | 0.8899 | 1.0656 | 0.5748 | 0.0106  | 0.0162 | 0.5261 | 15.6554 | 0.1544 | -161.6098  |
| s_Bacteroides_fragilis     | IschemicStroke      | Weighted median           | 13 | 1.0036 | 0.9668 | 1.0419 | 0.8493 | 0.0106  | 0.0162 | 0.5261 | 15.6554 | 0.1544 | -161.6098  |
| s_Bacteroides_fragilis     | IschemicStroke      | Inverse variance weighted | 13 | 1.0016 | 0.9707 | 1.0334 | 0.9226 | 0.0106  | 0.0162 | 0.5261 | 15.6554 | 0.1544 | -161.6098  |
| s_Bacteroides_fragilis     | IschemicStroke      | Simple mode               | 13 | 1.0051 | 0.9523 | 1.0608 | 0.8561 | 0.0106  | 0.0162 | 0.5261 | 15.6554 | 0.1544 | -161.6098  |
| s_Bacteroides_fragilis     | IschemicStroke      | Weighted mode             | 13 | 1.0071 | 0.9587 | 1.0580 | 0.7831 | 0.0106  | 0.0162 | 0.5261 | 15.6554 | 0.1544 | -161.6098  |
| s_Bacteroides_fragilis     | LargeArteryStroke   | MR Egger                  | 9  | 0.7759 | 0.5825 | 1.0335 | 0.1263 | 0.0857  | 0.0490 | 0.1235 | 8.3002  | 0.4047 | -217.5734  |
| s_Bacteroides_fragilis     | LargeArteryStroke   | Weighted median           | 9  | 0.9159 | 0.8044 | 1.0428 | 0.1845 | 0.0857  | 0.0490 | 0.1235 | 8.3002  | 0.4047 | -217.5734  |
| s_Bacteroides_fragilis     | LargeArteryStroke   | Inverse variance weighted | 9  | 0.9883 | 0.8984 | 1.0872 | 0.8088 | 0.0857  | 0.0490 | 0.1235 | 8.3002  | 0.4047 | -217.5734  |
| s_Bacteroides_fragilis     | LargeArteryStroke   | Simple mode               | 9  | 0.8920 | 0.7061 | 1.1268 | 0.3657 | 0.0857  | 0.0490 | 0.1235 | 8.3002  | 0.4047 | -217.5734  |
| s_Bacteroides_fragilis     | LargeArteryStroke   | Weighted mode             | 9  | 0.8952 | 0.7245 | 1.1061 | 0.3349 | 0.0857  | 0.0490 | 0.1235 | 8.3002  | 0.4047 | -217.5734  |
| s_Bacteroides_fragilis     | SmallVesselStroke   | MR Egger                  | 10 | 1.0426 | 0.8992 | 1.2089 | 0.5955 | -0.0037 | 0.0258 | 0.8892 | 6.1175  | 0.6341 | -192.7906  |
| s_Bacteroides_fragilis     | SmallVesselStroke   | Weighted median           | 10 | 1.0425 | 0.9738 | 1.1160 | 0.2312 | -0.0037 | 0.0258 | 0.8892 | 6.1175  | 0.6341 | -192.7906  |
| s_Bacteroides_fragilis     | SmallVesselStroke   | Inverse variance weighted | 10 | 1.0320 | 0.9810 | 1.0857 | 0.2229 | -0.0037 | 0.0258 | 0.8892 | 6.1175  | 0.6341 | -192.7906  |
| s_Bacteroides_fragilis     | SmallVesselStroke   | Simple mode               | 10 | 1.0386 | 0.9409 | 1.1464 | 0.4717 | -0.0037 | 0.0258 | 0.8892 | 6.1175  | 0.6341 | -192.7906  |
| s_Bacteroides_fragilis     | SmallVesselStroke   | Weighted mode             | 10 | 1.0365 | 0.9496 | 1.1314 | 0.4431 | -0.0037 | 0.0258 | 0.8892 | 6.1175  | 0.6341 | -192.7906  |
| s_Bacteroides_fragilis     | Stroke              | MR Egger                  | 14 | 1.0035 | 0.9340 | 1.0782 | 0.9253 | -0.0005 | 0.0130 | 0.9699 | 15.0625 | 0.2380 | -100.6297  |
| s_Bacteroides_fragilis     | Stroke              | Weighted median           | 14 | 0.9991 | 0.9660 | 1.0333 | 0.9575 | -0.0005 | 0.0130 | 0.9699 | 15.0625 | 0.2380 | -100.6297  |
| s_Bacteroides_fragilis     | Stroke              | Inverse variance weighted | 14 | 1.0022 | 0.9778 | 1.0272 | 0.8616 | -0.0005 | 0.0130 | 0.9699 | 15.0625 | 0.2380 | -100.6297  |
| s_Bacteroides_fragilis     | Stroke              | Simple mode               | 14 | 0.9915 | 0.9393 | 1.0466 | 0.7619 | -0.0005 | 0.0130 | 0.9699 | 15.0625 | 0.2380 | -100.6297  |
| s_Bacteroides_fragilis     | Stroke              | Weighted mode             | 14 | 0.9896 | 0.9426 | 1.0391 | 0.6823 | -0.0005 | 0.0130 | 0.9699 | 15.0625 | 0.2380 | -100.6297  |
| s_Bacteroides_helcogenes   | CardioEmbolicStroke | MR Egger                  | 11 | 1.3007 | 0.6748 | 2.5069 | 0.4525 | -0.1011 | 0.0973 | 0.3257 | 10.9755 | 0.3594 | -5512.8570 |
| s_Bacteroides_helcogenes   | CardioEmbolicStroke | Weighted median           | 11 | 0.9059 | 0.7618 | 1.0771 | 0.2630 | -0.1011 | 0.0973 | 0.3257 | 10.9755 | 0.3594 | -5512.8570 |
| s_Bacteroides_helcogenes   | CardioEmbolicStroke | Inverse variance weighted | 11 | 0.9249 | 0.8109 | 1.0548 | 0.2444 | -0.1011 | 0.0973 | 0.3257 | 10.9755 | 0.3594 | -5512.8570 |
| s_Bacteroides_helcogenes   | CardioEmbolicStroke | Simple mode               | 11 | 0.8981 | 0.6633 | 1.2159 | 0.5026 | -0.1011 | 0.0973 | 0.3257 | 10.9755 | 0.3594 | -5512.8570 |
| s_Bacteroides_helcogenes   | CardioEmbolicStroke | Weighted mode             | 11 | 0.9128 | 0.6682 | 1.2470 | 0.5792 | -0.1011 | 0.0973 | 0.3257 | 10.9755 | 0.3594 | -5512.8570 |
| s_Bacteroides_helcogenes   | IschemicStroke      | MR Egger                  | 17 | 1.0115 | 0.9710 | 1.0537 | 0.5911 | 0.0000  | 0.0080 | 0.9957 | 14.7948 | 0.4663 | -72.9716   |
| s_Bacteroides_helcogenes   | IschemicStroke      | Weighted median           | 17 | 1.0138 | 0.9844 | 1.0442 | 0.3615 | 0.0000  | 0.0080 | 0.9957 | 14.7948 | 0.4663 | -72.9716   |
| s_Bacteroides_helcogenes   | IschemicStroke      | Inverse variance weighted | 17 | 1.0114 | 0.9901 | 1.0332 | 0.2956 | 0.0000  | 0.0080 | 0.9957 | 14.7948 | 0.4663 | -72.9716   |
| s_Bacteroides_helcogenes   | IschemicStroke      | Simple mode               | 17 | 1.0150 | 0.9670 | 1.0652 | 0.5558 | 0.0000  | 0.0080 | 0.9957 | 14.7948 | 0.4663 | -72.9716   |
| s_Bacteroides_helcogenes   | IschemicStroke      | Weighted mode             | 17 | 1.0114 | 0.9705 | 1.0541 | 0.5977 | 0.0000  | 0.0080 | 0.9957 | 14.7948 | 0.4663 | -72.9716   |
| s_Bacteroides_helcogenes   | LargeArteryStroke   | MR Egger                  | 13 | 1.1624 | 0.7452 | 1.8133 | 0.5207 | -0.0413 | 0.0712 | 0.5734 | 27.3098 | 0.0041 | -70.9361   |
| s_Bacteroides_helcogenes   | LargeArteryStroke   | Weighted median           | 13 | 1.0687 | 0.9415 | 1.2131 | 0.3040 | -0.0413 | 0.0712 | 0.5734 | 27.3098 | 0.0041 | -70.9361   |
| s_Bacteroides_helcogenes   | LargeArteryStroke   | Inverse variance weighted | 13 | 1.0254 | 0.8990 | 1.1696 | 0.7083 | -0.0413 | 0.0712 | 0.5734 | 27.3098 | 0.0041 | -70.9361   |
| s_Bacteroides_helcogenes   | LargeArteryStroke   | Simple mode               | 13 | 1.1111 | 0.9081 | 1.3595 | 0.3264 | -0.0413 | 0.0712 | 0.5734 | 27.3098 | 0.0041 | -70.9361   |
| s_Bacteroides_helcogenes   | LargeArteryStroke   | Weighted mode             | 13 | 1.1264 | 0.9521 | 1.3325 | 0.1904 | -0.0413 | 0.0712 | 0.5734 | 27.3098 | 0.0041 | -70.9361   |
| s_Bacteroides_helcogenes   | SmallVesselStroke   | MR Egger                  | 13 | 1.1466 | 0.9800 | 1.3415 | 0.1158 | -0.0300 | 0.0251 | 0.2575 | 12.0313 | 0.4432 | -201.0292  |
| s_Bacteroides_helcogenes   | SmallVesselStroke   | Weighted median           | 13 | 1.0665 | 0.9982 | 1.1394 | 0.0564 | -0.0300 | 0.0251 | 0.2575 | 12.0313 | 0.4432 | -201.0292  |
| s_Bacteroides_helcogenes   | SmallVesselStroke   | Inverse variance weighted | 13 | 1.0467 | 0.9978 | 1.0979 | 0.0613 | -0.0300 | 0.0251 | 0.2575 | 12.0313 | 0.4432 | -201.0292  |
| s_Bacteroides_helcogenes   | SmallVesselStroke   | Simple mode               | 13 | 1.1165 | 0.9769 | 1.2761 | 0.1317 | -0.0300 | 0.0251 | 0.2575 | 12.0313 | 0.4432 | -201.0292  |
| s_Bacteroides_helcogenes   | SmallVesselStroke   | Weighted mode             | 13 | 1.1083 | 0.9800 | 1.2533 | 0.1274 | -0.0300 | 0.0251 | 0.2575 | 12.0313 | 0.4432 | -201.0292  |
| s_Bacteroides_helcogenes   | Stroke              | MR Egger                  | 18 | 1.0287 | 0.9866 | 1.0725 | 0.2033 | -0.0046 | 0.0078 | 0.5616 | 18.9677 | 0.2703 | -75.7921   |
| s_Bacteroides_helcogenes   | Stroke              | Weighted median           | 18 | 1.0191 | 0.9907 | 1.0483 | 0.1900 | -0.0046 | 0.0078 | 0.5616 | 18.9677 | 0.2703 | -75.7921   |
| s_Bacteroides_helcogenes   | Stroke              | Inverse variance weighted | 18 | 1.0173 | 0.9974 | 1.0377 | 0.0881 | -0.0046 | 0.0078 | 0.5616 | 18.9677 | 0.2703 | -75.7921   |
| s_Bacteroides_helcogenes   | Stroke              | Simple mode               | 18 | 1.0224 | 0.9754 | 1.0717 | 0.3696 | -0.0046 | 0.0078 | 0.5616 | 18.9677 | 0.2703 | -75.7921   |
| s_Bacteroides_helcogenes   | Stroke              | Weighted mode             | 18 | 1.0242 | 0.9842 | 1.0658 | 0.2562 | -0.0046 | 0.0078 | 0.5616 | 18.9677 | 0.2703 | -75.7921   |
| s_Bacteroides_intestinalis | CardioEmbolicStroke | MR Egger                  | 8  | 0.9662 | 0.6991 | 1.3353 | 0.8418 | 0.0022  | 0.0662 | 0.9741 | 11.6310 | 0.0707 | -110.5766  |
| s_Bacteroides_intestinalis | CardioEmbolicStroke | Weighted median           | 8  | 0.9973 | 0.8572 | 1.1603 | 0.9717 | 0.0022  | 0.0662 | 0.9741 | 11.6310 | 0.0707 | -110.5766  |
| s_Bacteroides_intestinalis | CardioEmbolicStroke | Inverse variance weighted | 8  | 0.9710 | 0.8474 | 1.1126 | 0.6718 | 0.0022  | 0.0662 | 0.9741 | 11.6310 | 0.0707 | -110.5766  |
| s_Bacteroides_intestinalis | CardioEmbolicStroke | Simple mode               | 8  | 0.9811 | 0.7552 | 1.2746 | 0.8905 | 0.0022  | 0.0662 | 0.9741 | 11.6310 | 0.0707 | -110.5766  |
| s_Bacteroides_intestinalis | CardioEmbolicStroke | Weighted mode             | 8  | 1.0041 | 0.8336 | 1.2096 | 0.9666 | 0.0022  | 0.0662 | 0.9741 | 11.6310 | 0.0707 | -110.5766  |
| s_Bacteroides_intestinalis | IschemicStroke      | MR Egger                  | 16 | 0.9863 | 0.9464 | 1.0279 | 0.5241 | 0.0081  | 0.0098 | 0.4206 | 9.3339  | 0.8091 | -138.0270  |
| s_Bacteroides_intestinalis | IschemicStroke      | Weighted median           | 16 | 0.9954 | 0.9683 | 1.0233 | 0.7422 | 0.0081  | 0.0098 | 0.4206 | 9.3339  | 0.8091 | -138.0270  |

|                             |                     |                           |    |        |        |        |        |         |        |        |         |        |              |
|-----------------------------|---------------------|---------------------------|----|--------|--------|--------|--------|---------|--------|--------|---------|--------|--------------|
| s_Bacteroides_intestinalis  | IschemicStroke      | Inverse variance weighted | 16 | 1.0017 | 0.9826 | 1.0212 | 0.8633 | 0.0081  | 0.0098 | 0.4206 | 9.3339  | 0.8091 | -138.0270    |
| s_Bacteroides_intestinalis  | IschemicStroke      | Simple mode               | 16 | 0.9865 | 0.9429 | 1.0322 | 0.5658 | 0.0081  | 0.0098 | 0.4206 | 9.3339  | 0.8091 | -138.0270    |
| s_Bacteroides_intestinalis  | IschemicStroke      | Weighted mode             | 16 | 0.9912 | 0.9599 | 1.0235 | 0.5957 | 0.0081  | 0.0098 | 0.4206 | 9.3339  | 0.8091 | -138.0270    |
| s_Bacteroides_intestinalis  | LargeArteryStroke   | MR Egger                  | 14 | 0.8638 | 0.7441 | 1.0027 | 0.0784 | 0.0853  | 0.0349 | 0.0309 | 21.3024 | 0.0672 | -11.8966     |
| s_Bacteroides_intestinalis  | LargeArteryStroke   | Weighted median           | 14 | 0.9896 | 0.9005 | 1.0876 | 0.8282 | 0.0853  | 0.0349 | 0.0309 | 21.3024 | 0.0672 | -11.8966     |
| s_Bacteroides_intestinalis  | LargeArteryStroke   | Inverse variance weighted | 14 | 1.0180 | 0.9376 | 1.1053 | 0.6704 | 0.0853  | 0.0349 | 0.0309 | 21.3024 | 0.0672 | -11.8966     |
| s_Bacteroides_intestinalis  | LargeArteryStroke   | Simple mode               | 14 | 1.0227 | 0.8631 | 1.2119 | 0.7991 | 0.0853  | 0.0349 | 0.0309 | 21.3024 | 0.0672 | -11.8966     |
| s_Bacteroides_intestinalis  | LargeArteryStroke   | Weighted mode             | 14 | 0.9909 | 0.8856 | 1.1087 | 0.8753 | 0.0853  | 0.0349 | 0.0309 | 21.3024 | 0.0672 | -11.8966     |
| s_Bacteroides_intestinalis  | SmallVesselStroke   | MR Egger                  | 16 | 0.9962 | 0.9231 | 1.0750 | 0.9232 | 0.0101  | 0.0181 | 0.5836 | 14.5955 | 0.4064 | -38.6636     |
| s_Bacteroides_intestinalis  | SmallVesselStroke   | Weighted median           | 16 | 1.0467 | 0.9954 | 1.1006 | 0.0751 | 0.0101  | 0.0181 | 0.5836 | 14.5955 | 0.4064 | -38.6636     |
| s_Bacteroides_intestinalis  | SmallVesselStroke   | Inverse variance weighted | 16 | 1.0156 | 0.9808 | 1.0516 | 0.3841 | 0.0101  | 0.0181 | 0.5836 | 14.5955 | 0.4064 | -38.6636     |
| s_Bacteroides_intestinalis  | SmallVesselStroke   | Simple mode               | 16 | 1.0622 | 0.9763 | 1.1558 | 0.1812 | 0.0101  | 0.0181 | 0.5836 | 14.5955 | 0.4064 | -38.6636     |
| s_Bacteroides_intestinalis  | SmallVesselStroke   | Weighted mode             | 16 | 1.0593 | 0.9893 | 1.1342 | 0.1192 | 0.0101  | 0.0181 | 0.5836 | 14.5955 | 0.4064 | -38.6636     |
| s_Bacteroides_intestinalis  | Stroke              | MR Egger                  | 17 | 0.9911 | 0.9557 | 1.0278 | 0.6373 | 0.0070  | 0.0085 | 0.4216 | 7.5262  | 0.9414 | -157.5489    |
| s_Bacteroides_intestinalis  | Stroke              | Weighted median           | 17 | 0.9992 | 0.9771 | 1.0217 | 0.9415 | 0.0070  | 0.0085 | 0.4216 | 7.5262  | 0.9414 | -157.5489    |
| s_Bacteroides_intestinalis  | Stroke              | Inverse variance weighted | 17 | 1.0047 | 0.9879 | 1.0217 | 0.5893 | 0.0070  | 0.0085 | 0.4216 | 7.5262  | 0.9414 | -157.5489    |
| s_Bacteroides_intestinalis  | Stroke              | Simple mode               | 17 | 1.0038 | 0.9680 | 1.0410 | 0.8396 | 0.0070  | 0.0085 | 0.4216 | 7.5262  | 0.9414 | -157.5489    |
| s_Bacteroides_intestinalis  | Stroke              | Weighted mode             | 17 | 0.9996 | 0.9676 | 1.0326 | 0.9793 | 0.0070  | 0.0085 | 0.4216 | 7.5262  | 0.9414 | -157.5489    |
| s_Bacteroides_ovatus        | CardioEmbolicStroke | MR Egger                  | 8  | 1.0279 | 0.5594 | 1.8889 | 0.9322 | 0.0109  | 0.0736 | 0.8874 | 9.6929  | 0.1382 | 311.8138     |
| s_Bacteroides_ovatus        | CardioEmbolicStroke | Weighted median           | 8  | 1.0477 | 0.8014 | 1.3697 | 0.7333 | 0.0109  | 0.0736 | 0.8874 | 9.6929  | 0.1382 | 311.8138     |
| s_Bacteroides_ovatus        | CardioEmbolicStroke | Inverse variance weighted | 8  | 1.0720 | 0.8538 | 1.3459 | 0.5494 | 0.0109  | 0.0736 | 0.8874 | 9.6929  | 0.1382 | 311.8138     |
| s_Bacteroides_ovatus        | CardioEmbolicStroke | Simple mode               | 8  | 1.0685 | 0.7222 | 1.5808 | 0.7499 | 0.0109  | 0.0736 | 0.8874 | 9.6929  | 0.1382 | 311.8138     |
| s_Bacteroides_ovatus        | CardioEmbolicStroke | Weighted mode             | 8  | 1.0447 | 0.7725 | 1.4127 | 0.7848 | 0.0109  | 0.0736 | 0.8874 | 9.6929  | 0.1382 | 311.8138     |
| s_Bacteroides_ovatus        | IschemicStroke      | MR Egger                  | 13 | 0.9888 | 0.9284 | 1.0532 | 0.7336 | -0.0015 | 0.0093 | 0.8704 | 5.3175  | 0.9148 | -350.9824    |
| s_Bacteroides_ovatus        | IschemicStroke      | Weighted median           | 13 | 0.9884 | 0.9461 | 1.0325 | 0.6002 | -0.0015 | 0.0093 | 0.8704 | 5.3175  | 0.9148 | -350.9824    |
| s_Bacteroides_ovatus        | IschemicStroke      | Inverse variance weighted | 13 | 0.9843 | 0.9521 | 1.0176 | 0.3522 | -0.0015 | 0.0093 | 0.8704 | 5.3175  | 0.9148 | -350.9824    |
| s_Bacteroides_ovatus        | IschemicStroke      | Simple mode               | 13 | 0.9990 | 0.9387 | 1.0632 | 0.9747 | -0.0015 | 0.0093 | 0.8704 | 5.3175  | 0.9148 | -350.9824    |
| s_Bacteroides_ovatus        | IschemicStroke      | Weighted mode             | 13 | 0.9984 | 0.9450 | 1.0547 | 0.9543 | -0.0015 | 0.0093 | 0.8704 | 5.3175  | 0.9148 | -350.9824    |
| s_Bacteroides_ovatus        | LargeArteryStroke   | MR Egger                  | 9  | 0.6788 | 0.4717 | 0.9770 | 0.0755 | 0.0657  | 0.0442 | 0.1810 | 6.9773  | 0.5391 | 502.9954     |
| s_Bacteroides_ovatus        | LargeArteryStroke   | Weighted median           | 9  | 0.8121 | 0.6687 | 0.9863 | 0.0358 | 0.0657  | 0.0442 | 0.1810 | 6.9773  | 0.5391 | 502.9954     |
| s_Bacteroides_ovatus        | LargeArteryStroke   | Inverse variance weighted | 9  | 0.8750 | 0.7587 | 1.0093 | 0.0668 | 0.0657  | 0.0442 | 0.1810 | 6.9773  | 0.5391 | 502.9954     |
| s_Bacteroides_ovatus        | LargeArteryStroke   | Simple mode               | 9  | 0.8154 | 0.5824 | 1.1415 | 0.2685 | 0.0657  | 0.0442 | 0.1810 | 6.9773  | 0.5391 | 502.9954     |
| s_Bacteroides_ovatus        | LargeArteryStroke   | Weighted mode             | 9  | 0.7775 | 0.5745 | 1.0522 | 0.1417 | 0.0657  | 0.0442 | 0.1810 | 6.9773  | 0.5391 | 502.9954     |
| s_Bacteroides_ovatus        | SmallVesselStroke   | MR Egger                  | 10 | 0.9911 | 0.8224 | 1.1943 | 0.9271 | -0.0103 | 0.0254 | 0.6955 | 13.3965 | 0.0989 | -462.5611    |
| s_Bacteroides_ovatus        | SmallVesselStroke   | Weighted median           | 10 | 0.9343 | 0.8403 | 1.0389 | 0.2093 | -0.0103 | 0.0254 | 0.6955 | 13.3965 | 0.0989 | -462.5611    |
| s_Bacteroides_ovatus        | SmallVesselStroke   | Inverse variance weighted | 10 | 0.9582 | 0.8789 | 1.0446 | 0.3319 | -0.0103 | 0.0254 | 0.6955 | 13.3965 | 0.0989 | -462.5611    |
| s_Bacteroides_ovatus        | SmallVesselStroke   | Simple mode               | 10 | 0.8459 | 0.6909 | 1.0356 | 0.1394 | -0.0103 | 0.0254 | 0.6955 | 13.3965 | 0.0989 | -462.5611    |
| s_Bacteroides_ovatus        | SmallVesselStroke   | Weighted mode             | 10 | 0.8964 | 0.7582 | 1.0597 | 0.2322 | -0.0103 | 0.0254 | 0.6955 | 13.3965 | 0.0989 | -462.5611    |
| s_Bacteroides_ovatus        | Stroke              | MR Egger                  | 11 | 0.9229 | 0.8414 | 1.0122 | 0.1228 | 0.0130  | 0.0112 | 0.2751 | 8.1619  | 0.6130 | -191328.8103 |
| s_Bacteroides_ovatus        | Stroke              | Weighted median           | 11 | 0.9768 | 0.9304 | 1.0257 | 0.3463 | 0.0130  | 0.0112 | 0.2751 | 8.1619  | 0.6130 | -191328.8103 |
| s_Bacteroides_ovatus        | Stroke              | Inverse variance weighted | 11 | 0.9708 | 0.9370 | 1.0057 | 0.1003 | 0.0130  | 0.0112 | 0.2751 | 8.1619  | 0.6130 | -191328.8103 |
| s_Bacteroides_ovatus        | Stroke              | Simple mode               | 11 | 0.9932 | 0.9227 | 1.0691 | 0.8596 | 0.0130  | 0.0112 | 0.2751 | 8.1619  | 0.6130 | -191328.8103 |
| s_Bacteroides_ovatus        | Stroke              | Weighted mode             | 11 | 0.9804 | 0.9202 | 1.0446 | 0.5550 | 0.0130  | 0.0112 | 0.2751 | 8.1619  | 0.6130 | -191328.8103 |
| s_Bacteroides_pectinophilus | CardioEmbolicStroke | MR Egger                  | 11 | 0.6942 | 0.5028 | 0.9583 | 0.0536 | 0.0099  | 0.0381 | 0.8016 | 5.6252  | 0.7768 | -1162.6111   |
| s_Bacteroides_pectinophilus | CardioEmbolicStroke | Weighted median           | 11 | 0.6803 | 0.5374 | 0.8613 | 0.0014 | 0.0099  | 0.0381 | 0.8016 | 5.6252  | 0.7768 | -1162.6111   |
| s_Bacteroides_pectinophilus | CardioEmbolicStroke | Inverse variance weighted | 11 | 0.7205 | 0.6158 | 0.8429 | 0.0000 | 0.0099  | 0.0381 | 0.8016 | 5.6252  | 0.7768 | -1162.6111   |
| s_Bacteroides_pectinophilus | CardioEmbolicStroke | Simple mode               | 11 | 0.6343 | 0.4389 | 0.9166 | 0.0358 | 0.0099  | 0.0381 | 0.8016 | 5.6252  | 0.7768 | -1162.6111   |
| s_Bacteroides_pectinophilus | CardioEmbolicStroke | Weighted mode             | 11 | 0.6674 | 0.4963 | 0.8977 | 0.0233 | 0.0099  | 0.0381 | 0.8016 | 5.6252  | 0.7768 | -1162.6111   |
| s_Bacteroides_pectinophilus | IschemicStroke      | MR Egger                  | 23 | 0.9836 | 0.9459 | 1.0228 | 0.4153 | -0.0071 | 0.0066 | 0.2954 | 16.7987 | 0.7744 | -43.2843     |
| s_Bacteroides_pectinophilus | IschemicStroke      | Weighted median           | 23 | 0.9589 | 0.9270 | 0.9919 | 0.0150 | -0.0071 | 0.0066 | 0.2954 | 16.7987 | 0.7744 | -43.2843     |
| s_Bacteroides_pectinophilus | IschemicStroke      | Inverse variance weighted | 23 | 0.9669 | 0.9444 | 0.9900 | 0.0052 | -0.0071 | 0.0066 | 0.2954 | 16.7987 | 0.7744 | -43.2843     |
| s_Bacteroides_pectinophilus | IschemicStroke      | Simple mode               | 23 | 0.9504 | 0.9002 | 1.0035 | 0.0801 | -0.0071 | 0.0066 | 0.2954 | 16.7987 | 0.7744 | -43.2843     |
| s_Bacteroides_pectinophilus | IschemicStroke      | Weighted mode             | 23 | 0.9580 | 0.9164 | 1.0014 | 0.0711 | -0.0071 | 0.0066 | 0.2954 | 16.7987 | 0.7744 | -43.2843     |

|                             |                     |                           |    |        |        |        |        |         |        |        |         |        |           |
|-----------------------------|---------------------|---------------------------|----|--------|--------|--------|--------|---------|--------|--------|---------|--------|-----------|
| s_Bacteroides_pectinophilus | LargeArteryStroke   | MR Egger                  | 18 | 1.0071 | 0.8361 | 1.2132 | 0.9414 | -0.0086 | 0.0279 | 0.7626 | 24.3630 | 0.0819 | -10.8159  |
| s_Bacteroides_pectinophilus | LargeArteryStroke   | Weighted median           | 18 | 1.0194 | 0.8898 | 1.1680 | 0.7815 | -0.0086 | 0.0279 | 0.7626 | 24.3630 | 0.0819 | -10.8159  |
| s_Bacteroides_pectinophilus | LargeArteryStroke   | Inverse variance weighted | 18 | 0.9835 | 0.8850 | 1.0930 | 0.7576 | -0.0086 | 0.0279 | 0.7626 | 24.3630 | 0.0819 | -10.8159  |
| s_Bacteroides_pectinophilus | LargeArteryStroke   | Simple mode               | 18 | 1.0387 | 0.7896 | 1.3665 | 0.7892 | -0.0086 | 0.0279 | 0.7626 | 24.3630 | 0.0819 | -10.8159  |
| s_Bacteroides_pectinophilus | LargeArteryStroke   | Weighted mode             | 18 | 1.0848 | 0.8432 | 1.3956 | 0.5351 | -0.0086 | 0.0279 | 0.7626 | 24.3630 | 0.0819 | -10.8159  |
| s_Bacteroides_pectinophilus | SmallVesselStroke   | MR Egger                  | 18 | 0.8829 | 0.8131 | 0.9586 | 0.0091 | 0.0135  | 0.0126 | 0.2990 | 13.0941 | 0.7299 | -27.9026  |
| s_Bacteroides_pectinophilus | SmallVesselStroke   | Weighted median           | 18 | 0.9068 | 0.8497 | 0.9676 | 0.0031 | 0.0135  | 0.0126 | 0.2990 | 13.0941 | 0.7299 | -27.9026  |
| s_Bacteroides_pectinophilus | SmallVesselStroke   | Inverse variance weighted | 18 | 0.9157 | 0.8725 | 0.9610 | 0.0003 | 0.0135  | 0.0126 | 0.2990 | 13.0941 | 0.7299 | -27.9026  |
| s_Bacteroides_pectinophilus | SmallVesselStroke   | Simple mode               | 18 | 0.9008 | 0.8174 | 0.9927 | 0.0503 | 0.0135  | 0.0126 | 0.2990 | 13.0941 | 0.7299 | -27.9026  |
| s_Bacteroides_pectinophilus | SmallVesselStroke   | Weighted mode             | 18 | 0.9008 | 0.8255 | 0.9830 | 0.0314 | 0.0135  | 0.0126 | 0.2990 | 13.0941 | 0.7299 | -27.9026  |
| s_Bacteroides_pectinophilus | Stroke              | MR Egger                  | 21 | 0.9964 | 0.9557 | 1.0388 | 0.8660 | -0.0073 | 0.0062 | 0.2532 | 17.9582 | 0.5902 | -72.7342  |
| s_Bacteroides_pectinophilus | Stroke              | Weighted median           | 21 | 0.9719 | 0.9407 | 1.0041 | 0.0868 | -0.0073 | 0.0062 | 0.2532 | 17.9582 | 0.5902 | -72.7342  |
| s_Bacteroides_pectinophilus | Stroke              | Inverse variance weighted | 21 | 0.9759 | 0.9534 | 0.9989 | 0.0403 | -0.0073 | 0.0062 | 0.2532 | 17.9582 | 0.5902 | -72.7342  |
| s_Bacteroides_pectinophilus | Stroke              | Simple mode               | 21 | 0.9689 | 0.9197 | 1.0208 | 0.2491 | -0.0073 | 0.0062 | 0.2532 | 17.9582 | 0.5902 | -72.7342  |
| s_Bacteroides_pectinophilus | Stroke              | Weighted mode             | 21 | 0.9689 | 0.9258 | 1.0141 | 0.1895 | -0.0073 | 0.0062 | 0.2532 | 17.9582 | 0.5902 | -72.7342  |
| s_Bacteroides_plebeius      | CardioEmbolicStroke | MR Egger                  | 14 | 0.9151 | 0.8298 | 1.0092 | 0.1008 | 0.0535  | 0.0368 | 0.1720 | 17.8074 | 0.1650 | -10.5606  |
| s_Bacteroides_plebeius      | CardioEmbolicStroke | Weighted median           | 14 | 0.9231 | 0.8546 | 0.9971 | 0.0419 | 0.0535  | 0.0368 | 0.1720 | 17.8074 | 0.1650 | -10.5606  |
| s_Bacteroides_plebeius      | CardioEmbolicStroke | Inverse variance weighted | 14 | 0.9713 | 0.9166 | 1.0293 | 0.3255 | 0.0535  | 0.0368 | 0.1720 | 17.8074 | 0.1650 | -10.5606  |
| s_Bacteroides_plebeius      | CardioEmbolicStroke | Simple mode               | 14 | 1.1083 | 0.9156 | 1.3415 | 0.3106 | 0.0535  | 0.0368 | 0.1720 | 17.8074 | 0.1650 | -10.5606  |
| s_Bacteroides_plebeius      | CardioEmbolicStroke | Weighted mode             | 14 | 0.9019 | 0.8301 | 0.9799 | 0.0298 | 0.0535  | 0.0368 | 0.1720 | 17.8074 | 0.1650 | -10.5606  |
| s_Bacteroides_plebeius      | IschemicStroke      | MR Egger                  | 16 | 0.9981 | 0.9797 | 1.0168 | 0.8450 | 0.0061  | 0.0074 | 0.4254 | 14.7730 | 0.3938 | -51.5752  |
| s_Bacteroides_plebeius      | IschemicStroke      | Weighted median           | 16 | 1.0000 | 0.9852 | 1.0151 | 0.9959 | 0.0061  | 0.0074 | 0.4254 | 14.7730 | 0.3938 | -51.5752  |
| s_Bacteroides_plebeius      | IschemicStroke      | Inverse variance weighted | 16 | 1.0045 | 0.9939 | 1.0152 | 0.4092 | 0.0061  | 0.0074 | 0.4254 | 14.7730 | 0.3938 | -51.5752  |
| s_Bacteroides_plebeius      | IschemicStroke      | Simple mode               | 16 | 1.0107 | 0.9827 | 1.0395 | 0.4683 | 0.0061  | 0.0074 | 0.4254 | 14.7730 | 0.3938 | -51.5752  |
| s_Bacteroides_plebeius      | IschemicStroke      | Weighted mode             | 16 | 1.0008 | 0.9880 | 1.0138 | 0.9049 | 0.0061  | 0.0074 | 0.4254 | 14.7730 | 0.3938 | -51.5752  |
| s_Bacteroides_plebeius      | LargeArteryStroke   | MR Egger                  | 15 | 1.0272 | 0.9658 | 1.0926 | 0.4091 | -0.0014 | 0.0240 | 0.9537 | 12.9306 | 0.4532 | -16.1902  |
| s_Bacteroides_plebeius      | LargeArteryStroke   | Weighted median           | 15 | 1.0318 | 0.9786 | 1.0879 | 0.2465 | -0.0014 | 0.0240 | 0.9537 | 12.9306 | 0.4532 | -16.1902  |
| s_Bacteroides_plebeius      | LargeArteryStroke   | Inverse variance weighted | 15 | 1.0256 | 0.9901 | 1.0624 | 0.1591 | -0.0014 | 0.0240 | 0.9537 | 12.9306 | 0.4532 | -16.1902  |
| s_Bacteroides_plebeius      | LargeArteryStroke   | Simple mode               | 15 | 1.0367 | 0.9553 | 1.1250 | 0.4025 | -0.0014 | 0.0240 | 0.9537 | 12.9306 | 0.4532 | -16.1902  |
| s_Bacteroides_plebeius      | LargeArteryStroke   | Weighted mode             | 15 | 1.0326 | 0.9825 | 1.0853 | 0.2269 | -0.0014 | 0.0240 | 0.9537 | 12.9306 | 0.4532 | -16.1902  |
| s_Bacteroides_plebeius      | SmallVesselStroke   | MR Egger                  | 16 | 1.0099 | 0.9696 | 1.0518 | 0.6422 | 0.0036  | 0.0162 | 0.8296 | 21.4984 | 0.0895 | -23.6691  |
| s_Bacteroides_plebeius      | SmallVesselStroke   | Weighted median           | 16 | 1.0073 | 0.9816 | 1.0336 | 0.5824 | 0.0036  | 0.0162 | 0.8296 | 21.4984 | 0.0895 | -23.6691  |
| s_Bacteroides_plebeius      | SmallVesselStroke   | Inverse variance weighted | 16 | 1.0137 | 0.9909 | 1.0369 | 0.2407 | 0.0036  | 0.0162 | 0.8296 | 21.4984 | 0.0895 | -23.6691  |
| s_Bacteroides_plebeius      | SmallVesselStroke   | Simple mode               | 16 | 1.0005 | 0.9417 | 1.0630 | 0.9881 | 0.0036  | 0.0162 | 0.8296 | 21.4984 | 0.0895 | -23.6691  |
| s_Bacteroides_plebeius      | SmallVesselStroke   | Weighted mode             | 16 | 1.0060 | 0.9788 | 1.0340 | 0.6731 | 0.0036  | 0.0162 | 0.8296 | 21.4984 | 0.0895 | -23.6691  |
| s_Bacteroides_plebeius      | Stroke              | MR Egger                  | 16 | 0.9957 | 0.9794 | 1.0123 | 0.6201 | 0.0064  | 0.0065 | 0.3447 | 15.3176 | 0.3568 | -62.6964  |
| s_Bacteroides_plebeius      | Stroke              | Weighted median           | 16 | 0.9993 | 0.9869 | 1.0120 | 0.9182 | 0.0064  | 0.0065 | 0.3447 | 15.3176 | 0.3568 | -62.6964  |
| s_Bacteroides_plebeius      | Stroke              | Inverse variance weighted | 16 | 1.0025 | 0.9930 | 1.0120 | 0.6089 | 0.0064  | 0.0065 | 0.3447 | 15.3176 | 0.3568 | -62.6964  |
| s_Bacteroides_plebeius      | Stroke              | Simple mode               | 16 | 1.0075 | 0.9812 | 1.0344 | 0.5874 | 0.0064  | 0.0065 | 0.3447 | 15.3176 | 0.3568 | -62.6964  |
| s_Bacteroides_plebeius      | Stroke              | Weighted mode             | 16 | 0.9967 | 0.9840 | 1.0096 | 0.6193 | 0.0064  | 0.0065 | 0.3447 | 15.3176 | 0.3568 | -62.6964  |
| s_Bacteroides_salanitronis  | CardioEmbolicStroke | MR Egger                  | 9  | 0.9456 | 0.5729 | 1.5610 | 0.8333 | 0.0206  | 0.0609 | 0.7453 | 4.9764  | 0.6628 | 8424.5189 |
| s_Bacteroides_salanitronis  | CardioEmbolicStroke | Weighted median           | 9  | 1.0259 | 0.8064 | 1.3052 | 0.8350 | 0.0206  | 0.0609 | 0.7453 | 4.9764  | 0.6628 | 8424.5189 |
| s_Bacteroides_salanitronis  | CardioEmbolicStroke | Inverse variance weighted | 9  | 1.0250 | 0.8555 | 1.2282 | 0.7887 | 0.0206  | 0.0609 | 0.7453 | 4.9764  | 0.6628 | 8424.5189 |
| s_Bacteroides_salanitronis  | CardioEmbolicStroke | Simple mode               | 9  | 1.0214 | 0.6902 | 1.5115 | 0.9182 | 0.0206  | 0.0609 | 0.7453 | 4.9764  | 0.6628 | 8424.5189 |
| s_Bacteroides_salanitronis  | CardioEmbolicStroke | Weighted mode             | 9  | 1.0073 | 0.7027 | 1.4439 | 0.9695 | 0.0206  | 0.0609 | 0.7453 | 4.9764  | 0.6628 | 8424.5189 |
| s_Bacteroides_salanitronis  | IschemicStroke      | MR Egger                  | 15 | 0.9674 | 0.8922 | 1.0489 | 0.4362 | 0.0116  | 0.0106 | 0.2955 | 11.4406 | 0.6511 | -275.3352 |
| s_Bacteroides_salanitronis  | IschemicStroke      | Weighted median           | 15 | 1.0172 | 0.9706 | 1.0662 | 0.4757 | 0.0116  | 0.0106 | 0.2955 | 11.4406 | 0.6511 | -275.3352 |
| s_Bacteroides_salanitronis  | IschemicStroke      | Inverse variance weighted | 15 | 1.0076 | 0.9738 | 1.0427 | 0.6626 | 0.0116  | 0.0106 | 0.2955 | 11.4406 | 0.6511 | -275.3352 |
| s_Bacteroides_salanitronis  | IschemicStroke      | Simple mode               | 15 | 1.0234 | 0.9406 | 1.1134 | 0.6001 | 0.0116  | 0.0106 | 0.2955 | 11.4406 | 0.6511 | -275.3352 |
| s_Bacteroides_salanitronis  | IschemicStroke      | Weighted mode             | 15 | 1.0234 | 0.9496 | 1.1029 | 0.5551 | 0.0116  | 0.0106 | 0.2955 | 11.4406 | 0.6511 | -275.3352 |
| s_Bacteroides_salanitronis  | LargeArteryStroke   | MR Egger                  | 12 | 0.9147 | 0.6893 | 1.2139 | 0.5508 | 0.0364  | 0.0380 | 0.3609 | 9.5694  | 0.4790 | -102.1027 |
| s_Bacteroides_salanitronis  | LargeArteryStroke   | Weighted median           | 12 | 1.0729 | 0.9125 | 1.2615 | 0.3945 | 0.0364  | 0.0380 | 0.3609 | 9.5694  | 0.4790 | -102.1027 |
| s_Bacteroides_salanitronis  | LargeArteryStroke   | Inverse variance weighted | 12 | 1.0370 | 0.9207 | 1.1679 | 0.5496 | 0.0364  | 0.0380 | 0.3609 | 9.5694  | 0.4790 | -102.1027 |

|                                |                     |                           |    |        |        |        |        |         |        |        |         |        |            |
|--------------------------------|---------------------|---------------------------|----|--------|--------|--------|--------|---------|--------|--------|---------|--------|------------|
| s_Bacteroides_salanitronis     | LargeArteryStroke   | Simple mode               | 12 | 1.0579 | 0.8080 | 1.3849 | 0.6902 | 0.0364  | 0.0380 | 0.3609 | 9.5694  | 0.4790 | -102.1027  |
| s_Bacteroides_salanitronis     | LargeArteryStroke   | Weighted mode             | 12 | 1.0516 | 0.8158 | 1.3555 | 0.7053 | 0.0364  | 0.0380 | 0.3609 | 9.5694  | 0.4790 | -102.1027  |
| s_Bacteroides_salanitronis     | SmallVesselStroke   | MR Egger                  | 13 | 1.0504 | 0.9020 | 1.2231 | 0.5400 | -0.0119 | 0.0208 | 0.5783 | 9.0118  | 0.6208 | -148.2722  |
| s_Bacteroides_salanitronis     | SmallVesselStroke   | Weighted median           | 13 | 1.0058 | 0.9243 | 1.0945 | 0.8933 | -0.0119 | 0.0208 | 0.5783 | 9.0118  | 0.6208 | -148.2722  |
| s_Bacteroides_salanitronis     | SmallVesselStroke   | Inverse variance weighted | 13 | 1.0089 | 0.9459 | 1.0761 | 0.7887 | -0.0119 | 0.0208 | 0.5783 | 9.0118  | 0.6208 | -148.2722  |
| s_Bacteroides_salanitronis     | SmallVesselStroke   | Simple mode               | 13 | 1.0092 | 0.8876 | 1.1476 | 0.8910 | -0.0119 | 0.0208 | 0.5783 | 9.0118  | 0.6208 | -148.2722  |
| s_Bacteroides_salanitronis     | SmallVesselStroke   | Weighted mode             | 13 | 1.0121 | 0.9017 | 1.1360 | 0.8418 | -0.0119 | 0.0208 | 0.5783 | 9.0118  | 0.6208 | -148.2722  |
| s_Bacteroides_salanitronis     | Stroke              | MR Egger                  | 17 | 0.9951 | 0.9296 | 1.0653 | 0.8898 | 0.0070  | 0.0090 | 0.4501 | 6.3701  | 0.9728 | -276.4694  |
| s_Bacteroides_salanitronis     | Stroke              | Weighted median           | 17 | 1.0074 | 0.9707 | 1.0456 | 0.6965 | 0.0070  | 0.0090 | 0.4501 | 6.3701  | 0.9728 | -276.4694  |
| s_Bacteroides_salanitronis     | Stroke              | Inverse variance weighted | 17 | 1.0197 | 0.9906 | 1.0496 | 0.1860 | 0.0070  | 0.0090 | 0.4501 | 6.3701  | 0.9728 | -276.4694  |
| s_Bacteroides_salanitronis     | Stroke              | Simple mode               | 17 | 0.9964 | 0.9353 | 1.0615 | 0.9134 | 0.0070  | 0.0090 | 0.4501 | 6.3701  | 0.9728 | -276.4694  |
| s_Bacteroides_salanitronis     | Stroke              | Weighted mode             | 17 | 0.9970 | 0.9379 | 1.0597 | 0.9234 | 0.0070  | 0.0090 | 0.4501 | 6.3701  | 0.9728 | -276.4694  |
| s_Bacteroides_stercoris        | CardioEmbolicStroke | MR Egger                  | 11 | 1.2478 | 0.7418 | 2.0991 | 0.4256 | -0.1010 | 0.1079 | 0.3737 | 8.1135  | 0.5227 | -117.5442  |
| s_Bacteroides_stercoris        | CardioEmbolicStroke | Weighted median           | 11 | 0.9024 | 0.7943 | 1.0252 | 0.1148 | -0.1010 | 0.1079 | 0.3737 | 8.1135  | 0.5227 | -117.5442  |
| s_Bacteroides_stercoris        | CardioEmbolicStroke | Inverse variance weighted | 11 | 0.9773 | 0.8905 | 1.0725 | 0.6283 | -0.1010 | 0.1079 | 0.3737 | 8.1135  | 0.5227 | -117.5442  |
| s_Bacteroides_stercoris        | CardioEmbolicStroke | Simple mode               | 11 | 0.8989 | 0.7186 | 1.1246 | 0.3730 | -0.1010 | 0.1079 | 0.3737 | 8.1135  | 0.5227 | -117.5442  |
| s_Bacteroides_stercoris        | CardioEmbolicStroke | Weighted mode             | 11 | 0.8888 | 0.7472 | 1.0572 | 0.2126 | -0.1010 | 0.1079 | 0.3737 | 8.1135  | 0.5227 | -117.5442  |
| s_Bacteroides_stercoris        | IschemicStroke      | MR Egger                  | 12 | 0.9900 | 0.9332 | 1.0502 | 0.7460 | 0.0021  | 0.0131 | 0.8779 | 5.4764  | 0.8572 | -180.7227  |
| s_Bacteroides_stercoris        | IschemicStroke      | Weighted median           | 12 | 1.0046 | 0.9788 | 1.0312 | 0.7275 | 0.0021  | 0.0131 | 0.8779 | 5.4764  | 0.8572 | -180.7227  |
| s_Bacteroides_stercoris        | IschemicStroke      | Inverse variance weighted | 12 | 0.9945 | 0.9748 | 1.0145 | 0.5842 | 0.0021  | 0.0131 | 0.8779 | 5.4764  | 0.8572 | -180.7227  |
| s_Bacteroides_stercoris        | IschemicStroke      | Simple mode               | 12 | 1.0050 | 0.9630 | 1.0490 | 0.8221 | 0.0021  | 0.0131 | 0.8779 | 5.4764  | 0.8572 | -180.7227  |
| s_Bacteroides_stercoris        | IschemicStroke      | Weighted mode             | 12 | 1.0044 | 0.9660 | 1.0443 | 0.8303 | 0.0021  | 0.0131 | 0.8779 | 5.4764  | 0.8572 | -180.7227  |
| s_Bacteroides_stercoris        | LargeArteryStroke   | MR Egger                  | 11 | 1.2340 | 0.8364 | 1.8206 | 0.3169 | -0.1011 | 0.0806 | 0.2417 | 7.5653  | 0.6712 | -176.1873  |
| s_Bacteroides_stercoris        | LargeArteryStroke   | Weighted median           | 11 | 0.9984 | 0.9088 | 1.0969 | 0.9737 | -0.1011 | 0.0806 | 0.2417 | 7.5653  | 0.6712 | -176.1873  |
| s_Bacteroides_stercoris        | LargeArteryStroke   | Inverse variance weighted | 11 | 0.9662 | 0.9013 | 1.0357 | 0.3320 | -0.1011 | 0.0806 | 0.2417 | 7.5653  | 0.6712 | -176.1873  |
| s_Bacteroides_stercoris        | LargeArteryStroke   | Simple mode               | 11 | 0.9662 | 0.8298 | 1.1250 | 0.6669 | -0.1011 | 0.0806 | 0.2417 | 7.5653  | 0.6712 | -176.1873  |
| s_Bacteroides_stercoris        | LargeArteryStroke   | Weighted mode             | 11 | 0.9886 | 0.8591 | 1.1376 | 0.8756 | -0.1011 | 0.0806 | 0.2417 | 7.5653  | 0.6712 | -176.1873  |
| s_Bacteroides_stercoris        | SmallVesselStroke   | MR Egger                  | 11 | 0.9955 | 0.7830 | 1.2658 | 0.9717 | 0.0111  | 0.0498 | 0.8291 | 11.2356 | 0.2599 | -421.1655  |
| s_Bacteroides_stercoris        | SmallVesselStroke   | Weighted median           | 11 | 1.0079 | 0.9531 | 1.0659 | 0.7831 | 0.0111  | 0.0498 | 0.8291 | 11.2356 | 0.2599 | -421.1655  |
| s_Bacteroides_stercoris        | SmallVesselStroke   | Inverse variance weighted | 11 | 1.0226 | 0.9814 | 1.0655 | 0.2874 | 0.0111  | 0.0498 | 0.8291 | 11.2356 | 0.2599 | -421.1655  |
| s_Bacteroides_stercoris        | SmallVesselStroke   | Simple mode               | 11 | 0.9851 | 0.8843 | 1.0975 | 0.7912 | 0.0111  | 0.0498 | 0.8291 | 11.2356 | 0.2599 | -421.1655  |
| s_Bacteroides_stercoris        | SmallVesselStroke   | Weighted mode             | 11 | 1.0815 | 0.9712 | 1.2045 | 0.1839 | 0.0111  | 0.0498 | 0.8291 | 11.2356 | 0.2599 | -421.1655  |
| s_Bacteroides_stercoris        | Stroke              | MR Egger                  | 11 | 0.9638 | 0.8718 | 1.0656 | 0.4901 | 0.0139  | 0.0208 | 0.5216 | 2.1828  | 0.9882 | -1995.8949 |
| s_Bacteroides_stercoris        | Stroke              | Weighted median           | 11 | 0.9931 | 0.9709 | 1.0160 | 0.5527 | 0.0139  | 0.0208 | 0.5216 | 2.1828  | 0.9882 | -1995.8949 |
| s_Bacteroides_stercoris        | Stroke              | Inverse variance weighted | 11 | 0.9967 | 0.9787 | 1.0151 | 0.7259 | 0.0139  | 0.0208 | 0.5216 | 2.1828  | 0.9882 | -1995.8949 |
| s_Bacteroides_stercoris        | Stroke              | Simple mode               | 11 | 0.9873 | 0.9531 | 1.0228 | 0.4955 | 0.0139  | 0.0208 | 0.5216 | 2.1828  | 0.9882 | -1995.8949 |
| s_Bacteroides_stercoris        | Stroke              | Weighted mode             | 11 | 0.9900 | 0.9561 | 1.0251 | 0.5832 | 0.0139  | 0.0208 | 0.5216 | 2.1828  | 0.9882 | -1995.8949 |
| s_Bacteroides_thetaiotaomicron | CardioEmbolicStroke | MR Egger                  | 14 | 0.4216 | 0.2124 | 0.8368 | 0.0295 | 0.1846  | 0.0765 | 0.0328 | 9.2125  | 0.7567 | 755.8837   |
| s_Bacteroides_thetaiotaomicron | CardioEmbolicStroke | Weighted median           | 14 | 0.9364 | 0.7609 | 1.1522 | 0.5345 | 0.1846  | 0.0765 | 0.0328 | 9.2125  | 0.7567 | 755.8837   |
| s_Bacteroides_thetaiotaomicron | CardioEmbolicStroke | Inverse variance weighted | 14 | 0.9596 | 0.8243 | 1.1171 | 0.5951 | 0.1846  | 0.0765 | 0.0328 | 9.2125  | 0.7567 | 755.8837   |
| s_Bacteroides_thetaiotaomicron | CardioEmbolicStroke | Simple mode               | 14 | 0.9632 | 0.6806 | 1.3631 | 0.8355 | 0.1846  | 0.0765 | 0.0328 | 9.2125  | 0.7567 | 755.8837   |
| s_Bacteroides_thetaiotaomicron | CardioEmbolicStroke | Weighted mode             | 14 | 0.9298 | 0.6542 | 1.3214 | 0.6913 | 0.1846  | 0.0765 | 0.0328 | 9.2125  | 0.7567 | 755.8837   |
| s_Bacteroides_thetaiotaomicron | IschemicStroke      | MR Egger                  | 23 | 1.0247 | 0.9718 | 1.0805 | 0.3768 | -0.0172 | 0.0077 | 0.0359 | 20.2486 | 0.5675 | -129.1198  |
| s_Bacteroides_thetaiotaomicron | IschemicStroke      | Weighted median           | 23 | 1.0024 | 0.9658 | 1.0404 | 0.8993 | -0.0172 | 0.0077 | 0.0359 | 20.2486 | 0.5675 | -129.1198  |
| s_Bacteroides_thetaiotaomicron | IschemicStroke      | Inverse variance weighted | 23 | 0.9718 | 0.9471 | 0.9970 | 0.0287 | -0.0172 | 0.0077 | 0.0359 | 20.2486 | 0.5675 | -129.1198  |
| s_Bacteroides_thetaiotaomicron | IschemicStroke      | Simple mode               | 23 | 0.9947 | 0.9287 | 1.0654 | 0.8798 | -0.0172 | 0.0077 | 0.0359 | 20.2486 | 0.5675 | -129.1198  |
| s_Bacteroides_thetaiotaomicron | IschemicStroke      | Weighted mode             | 23 | 1.0019 | 0.9562 | 1.0499 | 0.9366 | -0.0172 | 0.0077 | 0.0359 | 20.2486 | 0.5675 | -129.1198  |
| s_Bacteroides_thetaiotaomicron | LargeArteryStroke   | MR Egger                  | 21 | 1.0671 | 0.8890 | 1.2808 | 0.4943 | -0.0179 | 0.0263 | 0.5060 | 21.5526 | 0.3071 | -13.8680   |
| s_Bacteroides_thetaiotaomicron | LargeArteryStroke   | Weighted median           | 21 | 0.9737 | 0.8572 | 1.1061 | 0.6822 | -0.0179 | 0.0263 | 0.5060 | 21.5526 | 0.3071 | -13.8680   |
| s_Bacteroides_thetaiotaomicron | LargeArteryStroke   | Inverse variance weighted | 21 | 1.0099 | 0.9245 | 1.1033 | 0.8264 | -0.0179 | 0.0263 | 0.5060 | 21.5526 | 0.3071 | -13.8680   |
| s_Bacteroides_thetaiotaomicron | LargeArteryStroke   | Simple mode               | 21 | 0.9340 | 0.7574 | 1.1518 | 0.5304 | -0.0179 | 0.0263 | 0.5060 | 21.5526 | 0.3071 | -13.8680   |
| s_Bacteroides_thetaiotaomicron | LargeArteryStroke   | Weighted mode             | 21 | 0.9582 | 0.8249 | 1.1131 | 0.5830 | -0.0179 | 0.0263 | 0.5060 | 21.5526 | 0.3071 | -13.8680   |
| s_Bacteroides_thetaiotaomicron | SmallVesselStroke   | MR Egger                  | 22 | 1.0308 | 0.9321 | 1.1401 | 0.5612 | -0.0235 | 0.0145 | 0.1202 | 24.9505 | 0.2493 | -30.8011   |

|                                |                     |                           |    |        |        |        |        |         |        |        |         |        |             |
|--------------------------------|---------------------|---------------------------|----|--------|--------|--------|--------|---------|--------|--------|---------|--------|-------------|
| s_Bacteroides_thetaiotaomicron | SmallVesselStroke   | Weighted median           | 22 | 0.9924 | 0.9229 | 1.0672 | 0.8377 | -0.0235 | 0.0145 | 0.1202 | 24.9505 | 0.2493 | -30.8011    |
| s_Bacteroides_thetaiotaomicron | SmallVesselStroke   | Inverse variance weighted | 22 | 0.9584 | 0.9108 | 1.0084 | 0.1016 | -0.0235 | 0.0145 | 0.1202 | 24.9505 | 0.2493 | -30.8011    |
| s_Bacteroides_thetaiotaomicron | SmallVesselStroke   | Simple mode               | 22 | 1.0200 | 0.9135 | 1.1388 | 0.7287 | -0.0235 | 0.0145 | 0.1202 | 24.9505 | 0.2493 | -30.8011    |
| s_Bacteroides_thetaiotaomicron | SmallVesselStroke   | Weighted mode             | 22 | 0.9979 | 0.9182 | 1.0844 | 0.9602 | -0.0235 | 0.0145 | 0.1202 | 24.9505 | 0.2493 | -30.8011    |
| s_Bacteroides_thetaiotaomicron | Stroke              | MR Egger                  | 22 | 1.0108 | 0.9609 | 1.0633 | 0.6818 | -0.0134 | 0.0070 | 0.0692 | 18.5843 | 0.6118 | -185.8623   |
| s_Bacteroides_thetaiotaomicron | Stroke              | Weighted median           | 22 | 0.9814 | 0.9485 | 1.0153 | 0.2785 | -0.0134 | 0.0070 | 0.0692 | 18.5843 | 0.6118 | -185.8623   |
| s_Bacteroides_thetaiotaomicron | Stroke              | Inverse variance weighted | 22 | 0.9671 | 0.9452 | 0.9894 | 0.0040 | -0.0134 | 0.0070 | 0.0692 | 18.5843 | 0.6118 | -185.8623   |
| s_Bacteroides_thetaiotaomicron | Stroke              | Simple mode               | 22 | 0.9729 | 0.9082 | 1.0423 | 0.4435 | -0.0134 | 0.0070 | 0.0692 | 18.5843 | 0.6118 | -185.8623   |
| s_Bacteroides_thetaiotaomicron | Stroke              | Weighted mode             | 22 | 0.9927 | 0.9463 | 1.0415 | 0.7687 | -0.0134 | 0.0070 | 0.0692 | 18.5843 | 0.6118 | -185.8623   |
| s_Bacteroides_uniformis        | CardioEmbolicStroke | MR Egger                  | 7  | 1.3009 | 0.4239 | 3.9925 | 0.6650 | -0.0518 | 0.1421 | 0.7305 | 4.5809  | 0.4691 | 211.0043    |
| s_Bacteroides_uniformis        | CardioEmbolicStroke | Weighted median           | 7  | 1.0793 | 0.8403 | 1.3863 | 0.5502 | -0.0518 | 0.1421 | 0.7305 | 4.5809  | 0.4691 | 211.0043    |
| s_Bacteroides_uniformis        | CardioEmbolicStroke | Inverse variance weighted | 7  | 1.0592 | 0.8765 | 1.2801 | 0.5514 | -0.0518 | 0.1421 | 0.7305 | 4.5809  | 0.4691 | 211.0043    |
| s_Bacteroides_uniformis        | CardioEmbolicStroke | Simple mode               | 7  | 1.1841 | 0.7908 | 1.7732 | 0.4434 | -0.0518 | 0.1421 | 0.7305 | 4.5809  | 0.4691 | 211.0043    |
| s_Bacteroides_uniformis        | CardioEmbolicStroke | Weighted mode             | 7  | 1.2196 | 0.8135 | 1.8284 | 0.3738 | -0.0518 | 0.1421 | 0.7305 | 4.5809  | 0.4691 | 211.0043    |
| s_Bacteroides_uniformis        | IschemicStroke      | MR Egger                  | 18 | 0.9898 | 0.9521 | 1.0289 | 0.6099 | 0.0019  | 0.0090 | 0.8337 | 20.5444 | 0.1967 | -26.6617    |
| s_Bacteroides_uniformis        | IschemicStroke      | Weighted median           | 18 | 0.9995 | 0.9687 | 1.0312 | 0.9732 | 0.0019  | 0.0090 | 0.8337 | 20.5444 | 0.1967 | -26.6617    |
| s_Bacteroides_uniformis        | IschemicStroke      | Inverse variance weighted | 18 | 0.9930 | 0.9697 | 1.0169 | 0.5622 | 0.0019  | 0.0090 | 0.8337 | 20.5444 | 0.1967 | -26.6617    |
| s_Bacteroides_uniformis        | IschemicStroke      | Simple mode               | 18 | 0.9992 | 0.9506 | 1.0502 | 0.9749 | 0.0019  | 0.0090 | 0.8337 | 20.5444 | 0.1967 | -26.6617    |
| s_Bacteroides_uniformis        | IschemicStroke      | Weighted mode             | 18 | 1.0060 | 0.9692 | 1.0442 | 0.7561 | 0.0019  | 0.0090 | 0.8337 | 20.5444 | 0.1967 | -26.6617    |
| s_Bacteroides_uniformis        | LargeArteryStroke   | MR Egger                  | 12 | 1.0100 | 0.8856 | 1.1520 | 0.8846 | 0.0093  | 0.0272 | 0.7398 | 3.6669  | 0.9611 | -37.9043    |
| s_Bacteroides_uniformis        | LargeArteryStroke   | Weighted median           | 12 | 1.0364 | 0.9287 | 1.1566 | 0.5227 | 0.0093  | 0.0272 | 0.7398 | 3.6669  | 0.9611 | -37.9043    |
| s_Bacteroides_uniformis        | LargeArteryStroke   | Inverse variance weighted | 12 | 1.0282 | 0.9465 | 1.1170 | 0.5104 | 0.0093  | 0.0272 | 0.7398 | 3.6669  | 0.9611 | -37.9043    |
| s_Bacteroides_uniformis        | LargeArteryStroke   | Simple mode               | 12 | 1.0188 | 0.8746 | 1.1867 | 0.8154 | 0.0093  | 0.0272 | 0.7398 | 3.6669  | 0.9611 | -37.9043    |
| s_Bacteroides_uniformis        | LargeArteryStroke   | Weighted mode             | 12 | 1.0396 | 0.9204 | 1.1743 | 0.5443 | 0.0093  | 0.0272 | 0.7398 | 3.6669  | 0.9611 | -37.9043    |
| s_Bacteroides_uniformis        | SmallVesselStroke   | MR Egger                  | 14 | 1.0077 | 0.9451 | 1.0745 | 0.8181 | -0.0111 | 0.0145 | 0.4576 | 8.5064  | 0.7444 | -32.8551    |
| s_Bacteroides_uniformis        | SmallVesselStroke   | Weighted median           | 14 | 1.0158 | 0.9612 | 1.0735 | 0.5787 | -0.0111 | 0.0145 | 0.4576 | 8.5064  | 0.7444 | -32.8551    |
| s_Bacteroides_uniformis        | SmallVesselStroke   | Inverse variance weighted | 14 | 0.9886 | 0.9485 | 1.0304 | 0.5875 | -0.0111 | 0.0145 | 0.4576 | 8.5064  | 0.7444 | -32.8551    |
| s_Bacteroides_uniformis        | SmallVesselStroke   | Simple mode               | 14 | 1.0132 | 0.9367 | 1.0959 | 0.7490 | -0.0111 | 0.0145 | 0.4576 | 8.5064  | 0.7444 | -32.8551    |
| s_Bacteroides_uniformis        | SmallVesselStroke   | Weighted mode             | 14 | 1.0148 | 0.9547 | 1.0787 | 0.6446 | -0.0111 | 0.0145 | 0.4576 | 8.5064  | 0.7444 | -32.8551    |
| s_Bacteroides_uniformis        | Stroke              | MR Egger                  | 18 | 0.9763 | 0.9417 | 1.0121 | 0.2104 | 0.0048  | 0.0075 | 0.5281 | 14.9858 | 0.5257 | -50.2442    |
| s_Bacteroides_uniformis        | Stroke              | Weighted median           | 18 | 0.9937 | 0.9648 | 1.0236 | 0.6770 | 0.0048  | 0.0075 | 0.5281 | 14.9858 | 0.5257 | -50.2442    |
| s_Bacteroides_uniformis        | Stroke              | Inverse variance weighted | 18 | 0.9858 | 0.9656 | 1.0065 | 0.1765 | 0.0048  | 0.0075 | 0.5281 | 14.9858 | 0.5257 | -50.2442    |
| s_Bacteroides_uniformis        | Stroke              | Simple mode               | 18 | 0.9986 | 0.9485 | 1.0513 | 0.9572 | 0.0048  | 0.0075 | 0.5281 | 14.9858 | 0.5257 | -50.2442    |
| s_Bacteroides_uniformis        | Stroke              | Weighted mode             | 18 | 1.0010 | 0.9588 | 1.0451 | 0.9651 | 0.0048  | 0.0075 | 0.5281 | 14.9858 | 0.5257 | -50.2442    |
| s_Bacteroides_xylanisolvans    | CardioEmbolicStroke | MR Egger                  | 5  | 0.4169 | 0.2030 | 0.8562 | 0.0974 | 0.1909  | 0.1079 | 0.1751 | 6.6939  | 0.1530 | 66.4837     |
| s_Bacteroides_xylanisolvans    | CardioEmbolicStroke | Weighted median           | 5  | 0.7654 | 0.5779 | 1.0138 | 0.0623 | 0.1909  | 0.1079 | 0.1751 | 6.6939  | 0.1530 | 66.4837     |
| s_Bacteroides_xylanisolvans    | CardioEmbolicStroke | Inverse variance weighted | 5  | 0.7746 | 0.5932 | 1.0117 | 0.0608 | 0.1909  | 0.1079 | 0.1751 | 6.6939  | 0.1530 | 66.4837     |
| s_Bacteroides_xylanisolvans    | CardioEmbolicStroke | Simple mode               | 5  | 0.7799 | 0.5199 | 1.1699 | 0.2958 | 0.1909  | 0.1079 | 0.1751 | 6.6939  | 0.1530 | 66.4837     |
| s_Bacteroides_xylanisolvans    | CardioEmbolicStroke | Weighted mode             | 5  | 0.7781 | 0.5341 | 1.1337 | 0.2615 | 0.1909  | 0.1079 | 0.1751 | 6.6939  | 0.1530 | 66.4837     |
| s_Bacteroides_xylanisolvans    | IschemicStroke      | MR Egger                  | 7  | 0.9613 | 0.8498 | 1.0874 | 0.5575 | 0.0121  | 0.0202 | 0.5751 | 5.3314  | 0.3768 | -18110.9076 |
| s_Bacteroides_xylanisolvans    | IschemicStroke      | Weighted median           | 7  | 0.9711 | 0.9215 | 1.0233 | 0.2722 | 0.0121  | 0.0202 | 0.5751 | 5.3314  | 0.3768 | -18110.9076 |
| s_Bacteroides_xylanisolvans    | IschemicStroke      | Inverse variance weighted | 7  | 0.9958 | 0.9545 | 1.0388 | 0.8436 | 0.0121  | 0.0202 | 0.5751 | 5.3314  | 0.3768 | -18110.9076 |
| s_Bacteroides_xylanisolvans    | IschemicStroke      | Simple mode               | 7  | 0.9746 | 0.9065 | 1.0478 | 0.5123 | 0.0121  | 0.0202 | 0.5751 | 5.3314  | 0.3768 | -18110.9076 |
| s_Bacteroides_xylanisolvans    | IschemicStroke      | Weighted mode             | 7  | 0.9712 | 0.9109 | 1.0355 | 0.4055 | 0.0121  | 0.0202 | 0.5751 | 5.3314  | 0.3768 | -18110.9076 |
| s_Bacteroides_xylanisolvans    | LargeArteryStroke   | MR Egger                  | 7  | 0.9289 | 0.6041 | 1.4283 | 0.7505 | 0.0224  | 0.0703 | 0.7630 | 6.0860  | 0.2979 | -2971.0482  |
| s_Bacteroides_xylanisolvans    | LargeArteryStroke   | Weighted median           | 7  | 0.9992 | 0.8298 | 1.2032 | 0.9936 | 0.0224  | 0.0703 | 0.7630 | 6.0860  | 0.2979 | -2971.0482  |
| s_Bacteroides_xylanisolvans    | LargeArteryStroke   | Inverse variance weighted | 7  | 0.9916 | 0.8615 | 1.1414 | 0.9068 | 0.0224  | 0.0703 | 0.7630 | 6.0860  | 0.2979 | -2971.0482  |
| s_Bacteroides_xylanisolvans    | LargeArteryStroke   | Simple mode               | 7  | 1.1613 | 0.8777 | 1.5366 | 0.3354 | 0.0224  | 0.0703 | 0.7630 | 6.0860  | 0.2979 | -2971.0482  |
| s_Bacteroides_xylanisolvans    | LargeArteryStroke   | Weighted mode             | 7  | 1.0265 | 0.7994 | 1.3181 | 0.8442 | 0.0224  | 0.0703 | 0.7630 | 6.0860  | 0.2979 | -2971.0482  |
| s_Bacteroides_xylanisolvans    | SmallVesselStroke   | MR Egger                  | 7  | 0.9589 | 0.7728 | 1.1899 | 0.7188 | 0.0308  | 0.0353 | 0.4240 | 3.5812  | 0.6111 | -10734.8598 |
| s_Bacteroides_xylanisolvans    | SmallVesselStroke   | Weighted median           | 7  | 1.0549 | 0.9583 | 1.1613 | 0.2753 | 0.0308  | 0.0353 | 0.4240 | 3.5812  | 0.6111 | -10734.8598 |
| s_Bacteroides_xylanisolvans    | SmallVesselStroke   | Inverse variance weighted | 7  | 1.0488 | 0.9717 | 1.1321 | 0.2214 | 0.0308  | 0.0353 | 0.4240 | 3.5812  | 0.6111 | -10734.8598 |
| s_Bacteroides_xylanisolvans    | SmallVesselStroke   | Simple mode               | 7  | 1.0532 | 0.9082 | 1.2215 | 0.5182 | 0.0308  | 0.0353 | 0.4240 | 3.5812  | 0.6111 | -10734.8598 |

|                                |                     |                           |    |        |        |        |        |         |        |        |         |        |             |
|--------------------------------|---------------------|---------------------------|----|--------|--------|--------|--------|---------|--------|--------|---------|--------|-------------|
| s_Bacteroides_xylanisolvens    | SmallVesselStroke   | Weighted mode             | 7  | 1.0560 | 0.9254 | 1.2050 | 0.4492 | 0.0308  | 0.0353 | 0.4240 | 3.5812  | 0.6111 | -10734.8598 |
| s_Bacteroides_xylanisolvens    | Stroke              | MR Egger                  | 8  | 0.9715 | 0.8765 | 1.0767 | 0.6012 | 0.0087  | 0.0168 | 0.6227 | 4.2832  | 0.6384 | -7278.4578  |
| s_Bacteroides_xylanisolvens    | Stroke              | Weighted median           | 8  | 0.9838 | 0.9399 | 1.0298 | 0.4842 | 0.0087  | 0.0168 | 0.6227 | 4.2832  | 0.6384 | -7278.4578  |
| s_Bacteroides_xylanisolvens    | Stroke              | Inverse variance weighted | 8  | 0.9965 | 0.9610 | 1.0334 | 0.8506 | 0.0087  | 0.0168 | 0.6227 | 4.2832  | 0.6384 | -7278.4578  |
| s_Bacteroides_xylanisolvens    | Stroke              | Simple mode               | 8  | 0.9815 | 0.9141 | 1.0540 | 0.6236 | 0.0087  | 0.0168 | 0.6227 | 4.2832  | 0.6384 | -7278.4578  |
| s_Bacteroides_xylanisolvens    | Stroke              | Weighted mode             | 8  | 0.9717 | 0.9138 | 1.0332 | 0.3894 | 0.0087  | 0.0168 | 0.6227 | 4.2832  | 0.6384 | -7278.4578  |
| s_Bifidobacterium_adolescentis | CardioEmbolicStroke | MR Egger                  | 5  | 1.0526 | 0.8109 | 1.3663 | 0.7258 | -0.0053 | 0.0904 | 0.9571 | 3.5444  | 0.3150 | -124.4047   |
| s_Bifidobacterium_adolescentis | CardioEmbolicStroke | Weighted median           | 5  | 1.0591 | 0.9520 | 1.1784 | 0.2913 | -0.0053 | 0.0904 | 0.9571 | 3.5444  | 0.3150 | -124.4047   |
| s_Bifidobacterium_adolescentis | CardioEmbolicStroke | Inverse variance weighted | 5  | 1.0449 | 0.9621 | 1.1350 | 0.2970 | -0.0053 | 0.0904 | 0.9571 | 3.5444  | 0.3150 | -124.4047   |
| s_Bifidobacterium_adolescentis | CardioEmbolicStroke | Simple mode               | 5  | 1.0580 | 0.9149 | 1.2234 | 0.4895 | -0.0053 | 0.0904 | 0.9571 | 3.5444  | 0.3150 | -124.4047   |
| s_Bifidobacterium_adolescentis | CardioEmbolicStroke | Weighted mode             | 5  | 1.0563 | 0.9266 | 1.2041 | 0.4588 | -0.0053 | 0.0904 | 0.9571 | 3.5444  | 0.3150 | -124.4047   |
| s_Bifidobacterium_adolescentis | IschemicStroke      | MR Egger                  | 7  | 0.9631 | 0.9146 | 1.0142 | 0.2132 | 0.0319  | 0.0184 | 0.1442 | 7.1554  | 0.3067 | -162.0032   |
| s_Bifidobacterium_adolescentis | IschemicStroke      | Weighted median           | 7  | 0.9989 | 0.9746 | 1.0239 | 0.9313 | 0.0319  | 0.0184 | 0.1442 | 7.1554  | 0.3067 | -162.0032   |
| s_Bifidobacterium_adolescentis | IschemicStroke      | Inverse variance weighted | 7  | 1.0052 | 0.9856 | 1.0251 | 0.6078 | 0.0319  | 0.0184 | 0.1442 | 7.1554  | 0.3067 | -162.0032   |
| s_Bifidobacterium_adolescentis | IschemicStroke      | Simple mode               | 7  | 1.0104 | 0.9727 | 1.0496 | 0.6122 | 0.0319  | 0.0184 | 0.1442 | 7.1554  | 0.3067 | -162.0032   |
| s_Bifidobacterium_adolescentis | IschemicStroke      | Weighted mode             | 7  | 0.9906 | 0.9621 | 1.0200 | 0.5500 | 0.0319  | 0.0184 | 0.1442 | 7.1554  | 0.3067 | -162.0032   |
| s_Bifidobacterium_adolescentis | LargeArteryStroke   | MR Egger                  | 6  | 0.8613 | 0.7252 | 1.0229 | 0.1641 | 0.0852  | 0.0608 | 0.2337 | 4.8800  | 0.4307 | -82.4952    |
| s_Bifidobacterium_adolescentis | LargeArteryStroke   | Weighted median           | 6  | 0.9576 | 0.8870 | 1.0339 | 0.2679 | 0.0852  | 0.0608 | 0.2337 | 4.8800  | 0.4307 | -82.4952    |
| s_Bifidobacterium_adolescentis | LargeArteryStroke   | Inverse variance weighted | 6  | 0.9667 | 0.9112 | 1.0257 | 0.2626 | 0.0852  | 0.0608 | 0.2337 | 4.8800  | 0.4307 | -82.4952    |
| s_Bifidobacterium_adolescentis | LargeArteryStroke   | Simple mode               | 6  | 0.9576 | 0.8632 | 1.0623 | 0.4504 | 0.0852  | 0.0608 | 0.2337 | 4.8800  | 0.4307 | -82.4952    |
| s_Bifidobacterium_adolescentis | LargeArteryStroke   | Weighted mode             | 6  | 0.9581 | 0.8743 | 1.0500 | 0.4021 | 0.0852  | 0.0608 | 0.2337 | 4.8800  | 0.4307 | -82.4952    |
| s_Bifidobacterium_adolescentis | SmallVesselStroke   | MR Egger                  | 6  | 0.9506 | 0.8579 | 1.0532 | 0.3874 | 0.0371  | 0.0362 | 0.3640 | 5.7813  | 0.3281 | -214.5793   |
| s_Bifidobacterium_adolescentis | SmallVesselStroke   | Weighted median           | 6  | 0.9934 | 0.9525 | 1.0360 | 0.7556 | 0.0371  | 0.0362 | 0.3640 | 5.7813  | 0.3281 | -214.5793   |
| s_Bifidobacterium_adolescentis | SmallVesselStroke   | Inverse variance weighted | 6  | 0.9996 | 0.9648 | 1.0356 | 0.9813 | 0.0371  | 0.0362 | 0.3640 | 5.7813  | 0.3281 | -214.5793   |
| s_Bifidobacterium_adolescentis | SmallVesselStroke   | Simple mode               | 6  | 0.9848 | 0.9289 | 1.0440 | 0.6286 | 0.0371  | 0.0362 | 0.3640 | 5.7813  | 0.3281 | -214.5793   |
| s_Bifidobacterium_adolescentis | SmallVesselStroke   | Weighted mode             | 6  | 0.9832 | 0.9368 | 1.0320 | 0.5243 | 0.0371  | 0.0362 | 0.3640 | 5.7813  | 0.3281 | -214.5793   |
| s_Bifidobacterium_adolescentis | Stroke              | MR Egger                  | 8  | 0.9804 | 0.9386 | 1.0241 | 0.4074 | 0.0182  | 0.0157 | 0.2918 | 7.8808  | 0.3432 | -123.8555   |
| s_Bifidobacterium_adolescentis | Stroke              | Weighted median           | 8  | 0.9941 | 0.9731 | 1.0155 | 0.5856 | 0.0182  | 0.0157 | 0.2918 | 7.8808  | 0.3432 | -123.8555   |
| s_Bifidobacterium_adolescentis | Stroke              | Inverse variance weighted | 8  | 1.0042 | 0.9881 | 1.0205 | 0.6132 | 0.0182  | 0.0157 | 0.2918 | 7.8808  | 0.3432 | -123.8555   |
| s_Bifidobacterium_adolescentis | Stroke              | Simple mode               | 8  | 0.9983 | 0.9642 | 1.0337 | 0.9284 | 0.0182  | 0.0157 | 0.2918 | 7.8808  | 0.3432 | -123.8555   |
| s_Bifidobacterium_adolescentis | Stroke              | Weighted mode             | 8  | 0.9908 | 0.9677 | 1.0144 | 0.4669 | 0.0182  | 0.0157 | 0.2918 | 7.8808  | 0.3432 | -123.8555   |
| s_Bifidobacterium_bifidum      | CardioEmbolicStroke | MR Egger                  | 8  | 1.1055 | 0.5329 | 2.2931 | 0.7967 | -0.0298 | 0.1752 | 0.8706 | 2.1314  | 0.9072 | -471.1839   |
| s_Bifidobacterium_bifidum      | CardioEmbolicStroke | Weighted median           | 8  | 1.0354 | 0.9312 | 1.1512 | 0.5208 | -0.0298 | 0.1752 | 0.8706 | 2.1314  | 0.9072 | -471.1839   |
| s_Bifidobacterium_bifidum      | CardioEmbolicStroke | Inverse variance weighted | 8  | 1.0381 | 0.9522 | 1.1318 | 0.3962 | -0.0298 | 0.1752 | 0.8706 | 2.1314  | 0.9072 | -471.1839   |
| s_Bifidobacterium_bifidum      | CardioEmbolicStroke | Simple mode               | 8  | 1.0881 | 0.9260 | 1.2787 | 0.3391 | -0.0298 | 0.1752 | 0.8706 | 2.1314  | 0.9072 | -471.1839   |
| s_Bifidobacterium_bifidum      | CardioEmbolicStroke | Weighted mode             | 8  | 1.0935 | 0.9239 | 1.2942 | 0.3332 | -0.0298 | 0.1752 | 0.8706 | 2.1314  | 0.9072 | -471.1839   |
| s_Bifidobacterium_bifidum      | IschemicStroke      | MR Egger                  | 16 | 0.9998 | 0.9786 | 1.0215 | 0.9876 | 0.0019  | 0.0081 | 0.8152 | 16.6462 | 0.2755 | -44.7580    |
| s_Bifidobacterium_bifidum      | IschemicStroke      | Weighted median           | 16 | 1.0040 | 0.9880 | 1.0203 | 0.6270 | 0.0019  | 0.0081 | 0.8152 | 16.6462 | 0.2755 | -44.7580    |
| s_Bifidobacterium_bifidum      | IschemicStroke      | Inverse variance weighted | 16 | 1.0020 | 0.9899 | 1.0141 | 0.7514 | 0.0019  | 0.0081 | 0.8152 | 16.6462 | 0.2755 | -44.7580    |
| s_Bifidobacterium_bifidum      | IschemicStroke      | Simple mode               | 16 | 1.0020 | 0.9747 | 1.0301 | 0.8890 | 0.0019  | 0.0081 | 0.8152 | 16.6462 | 0.2755 | -44.7580    |
| s_Bifidobacterium_bifidum      | IschemicStroke      | Weighted mode             | 16 | 1.0028 | 0.9824 | 1.0235 | 0.7952 | 0.0019  | 0.0081 | 0.8152 | 16.6462 | 0.2755 | -44.7580    |
| s_Bifidobacterium_bifidum      | LargeArteryStroke   | MR Egger                  | 11 | 1.0533 | 0.9424 | 1.1772 | 0.3841 | -0.0541 | 0.0390 | 0.1985 | 23.1352 | 0.0103 | -12.1399    |
| s_Bifidobacterium_bifidum      | LargeArteryStroke   | Weighted median           | 11 | 1.0084 | 0.9487 | 1.0718 | 0.7884 | -0.0541 | 0.0390 | 0.1985 | 23.1352 | 0.0103 | -12.1399    |
| s_Bifidobacterium_bifidum      | LargeArteryStroke   | Inverse variance weighted | 11 | 0.9866 | 0.9247 | 1.0526 | 0.6834 | -0.0541 | 0.0390 | 0.1985 | 23.1352 | 0.0103 | -12.1399    |
| s_Bifidobacterium_bifidum      | LargeArteryStroke   | Simple mode               | 11 | 1.0183 | 0.9276 | 1.1179 | 0.7107 | -0.0541 | 0.0390 | 0.1985 | 23.1352 | 0.0103 | -12.1399    |
| s_Bifidobacterium_bifidum      | LargeArteryStroke   | Weighted mode             | 11 | 1.0183 | 0.9564 | 1.0843 | 0.5829 | -0.0541 | 0.0390 | 0.1985 | 23.1352 | 0.0103 | -12.1399    |
| s_Bifidobacterium_bifidum      | SmallVesselStroke   | MR Egger                  | 11 | 0.9526 | 0.9127 | 0.9943 | 0.0534 | 0.0247  | 0.0150 | 0.1325 | 9.4697  | 0.4882 | -33.5494    |
| s_Bifidobacterium_bifidum      | SmallVesselStroke   | Weighted median           | 11 | 0.9722 | 0.9395 | 1.0061 | 0.1073 | 0.0247  | 0.0150 | 0.1325 | 9.4697  | 0.4882 | -33.5494    |
| s_Bifidobacterium_bifidum      | SmallVesselStroke   | Inverse variance weighted | 11 | 0.9817 | 0.9587 | 1.0053 | 0.1276 | 0.0247  | 0.0150 | 0.1325 | 9.4697  | 0.4882 | -33.5494    |
| s_Bifidobacterium_bifidum      | SmallVesselStroke   | Simple mode               | 11 | 0.9590 | 0.9029 | 1.0185 | 0.2023 | 0.0247  | 0.0150 | 0.1325 | 9.4697  | 0.4882 | -33.5494    |
| s_Bifidobacterium_bifidum      | SmallVesselStroke   | Weighted mode             | 11 | 0.9626 | 0.9239 | 1.0029 | 0.0986 | 0.0247  | 0.0150 | 0.1325 | 9.4697  | 0.4882 | -33.5494    |
| s_Bifidobacterium_bifidum      | Stroke              | MR Egger                  | 15 | 1.0017 | 0.9801 | 1.0237 | 0.8839 | 0.0026  | 0.0076 | 0.7367 | 16.3179 | 0.2324 | -52.4956    |
| s_Bifidobacterium_bifidum      | Stroke              | Weighted median           | 15 | 1.0006 | 0.9850 | 1.0164 | 0.9416 | 0.0026  | 0.0076 | 0.7367 | 16.3179 | 0.2324 | -52.4956    |

|                                   |                     |                           |    |        |        |        |        |         |        |        |         |        |          |
|-----------------------------------|---------------------|---------------------------|----|--------|--------|--------|--------|---------|--------|--------|---------|--------|----------|
| s_Bifidobacterium_bifidum         | Stroke              | Inverse variance weighted | 15 | 1.0049 | 0.9934 | 1.0164 | 0.4055 | 0.0026  | 0.0076 | 0.7367 | 16.3179 | 0.2324 | -52.4956 |
| s_Bifidobacterium_bifidum         | Stroke              | Simple mode               | 15 | 0.9933 | 0.9669 | 1.0205 | 0.6346 | 0.0026  | 0.0076 | 0.7367 | 16.3179 | 0.2324 | -52.4956 |
| s_Bifidobacterium_bifidum         | Stroke              | Weighted mode             | 15 | 0.9971 | 0.9764 | 1.0183 | 0.7937 | 0.0026  | 0.0076 | 0.7367 | 16.3179 | 0.2324 | -52.4956 |
| s_Bifidobacterium_breve           | CardioEmbolicStroke | MR Egger                  | 17 | 1.0564 | 0.7672 | 1.4546 | 0.7415 | -0.0064 | 0.0649 | 0.9222 | 21.9683 | 0.1086 | -21.0787 |
| s_Bifidobacterium_breve           | CardioEmbolicStroke | Weighted median           | 17 | 1.0612 | 0.9521 | 1.1827 | 0.2832 | -0.0064 | 0.0649 | 0.9222 | 21.9683 | 0.1086 | -21.0787 |
| s_Bifidobacterium_breve           | CardioEmbolicStroke | Inverse variance weighted | 17 | 1.0401 | 0.9481 | 1.1411 | 0.4051 | -0.0064 | 0.0649 | 0.9222 | 21.9683 | 0.1086 | -21.0787 |
| s_Bifidobacterium_breve           | CardioEmbolicStroke | Simple mode               | 17 | 1.0377 | 0.8567 | 1.2570 | 0.7100 | -0.0064 | 0.0649 | 0.9222 | 21.9683 | 0.1086 | -21.0787 |
| s_Bifidobacterium_breve           | CardioEmbolicStroke | Weighted mode             | 17 | 1.0429 | 0.8888 | 1.2237 | 0.6134 | -0.0064 | 0.0649 | 0.9222 | 21.9683 | 0.1086 | -21.0787 |
| s_Bifidobacterium_breve           | IschemicStroke      | MR Egger                  | 23 | 1.0181 | 0.9701 | 1.0685 | 0.4755 | -0.0057 | 0.0104 | 0.5897 | 19.0480 | 0.5821 | -71.6936 |
| s_Bifidobacterium_breve           | IschemicStroke      | Weighted median           | 23 | 1.0017 | 0.9784 | 1.0256 | 0.8855 | -0.0057 | 0.0104 | 0.5897 | 19.0480 | 0.5821 | -71.6936 |
| s_Bifidobacterium_breve           | IschemicStroke      | Inverse variance weighted | 23 | 1.0052 | 0.9889 | 1.0219 | 0.5337 | -0.0057 | 0.0104 | 0.5897 | 19.0480 | 0.5821 | -71.6936 |
| s_Bifidobacterium_breve           | IschemicStroke      | Simple mode               | 23 | 0.9941 | 0.9500 | 1.0402 | 0.8001 | -0.0057 | 0.0104 | 0.5897 | 19.0480 | 0.5821 | -71.6936 |
| s_Bifidobacterium_breve           | IschemicStroke      | Weighted mode             | 23 | 1.0023 | 0.9608 | 1.0455 | 0.9167 | -0.0057 | 0.0104 | 0.5897 | 19.0480 | 0.5821 | -71.6936 |
| s_Bifidobacterium_breve           | LargeArteryStroke   | MR Egger                  | 19 | 1.0288 | 0.7559 | 1.4003 | 0.8588 | -0.0223 | 0.0635 | 0.7295 | 47.1825 | 0.0001 | -13.9839 |
| s_Bifidobacterium_breve           | LargeArteryStroke   | Weighted median           | 19 | 0.9615 | 0.8770 | 1.0542 | 0.4031 | -0.0223 | 0.0635 | 0.7295 | 47.1825 | 0.0001 | -13.9839 |
| s_Bifidobacterium_breve           | LargeArteryStroke   | Inverse variance weighted | 19 | 0.9762 | 0.8889 | 1.0719 | 0.6132 | -0.0223 | 0.0635 | 0.7295 | 47.1825 | 0.0001 | -13.9839 |
| s_Bifidobacterium_breve           | LargeArteryStroke   | Simple mode               | 19 | 1.0401 | 0.8876 | 1.2188 | 0.6330 | -0.0223 | 0.0635 | 0.7295 | 47.1825 | 0.0001 | -13.9839 |
| s_Bifidobacterium_breve           | LargeArteryStroke   | Weighted mode             | 19 | 0.9666 | 0.8467 | 1.1035 | 0.6212 | -0.0223 | 0.0635 | 0.7295 | 47.1825 | 0.0001 | -13.9839 |
| s_Bifidobacterium_breve           | SmallVesselStroke   | MR Egger                  | 19 | 1.0389 | 0.9323 | 1.1576 | 0.4989 | -0.0168 | 0.0223 | 0.4604 | 18.4590 | 0.3605 | -43.8646 |
| s_Bifidobacterium_breve           | SmallVesselStroke   | Weighted median           | 19 | 0.9900 | 0.9469 | 1.0350 | 0.6572 | -0.0168 | 0.0223 | 0.4604 | 18.4590 | 0.3605 | -43.8646 |
| s_Bifidobacterium_breve           | SmallVesselStroke   | Inverse variance weighted | 19 | 0.9985 | 0.9661 | 1.0320 | 0.9284 | -0.0168 | 0.0223 | 0.4604 | 18.4590 | 0.3605 | -43.8646 |
| s_Bifidobacterium_breve           | SmallVesselStroke   | Simple mode               | 19 | 0.9954 | 0.9142 | 1.0839 | 0.9173 | -0.0168 | 0.0223 | 0.4604 | 18.4590 | 0.3605 | -43.8646 |
| s_Bifidobacterium_breve           | SmallVesselStroke   | Weighted mode             | 19 | 0.9954 | 0.9265 | 1.0695 | 0.9020 | -0.0168 | 0.0223 | 0.4604 | 18.4590 | 0.3605 | -43.8646 |
| s_Bifidobacterium_breve           | Stroke              | MR Egger                  | 24 | 1.0352 | 0.9950 | 1.0770 | 0.1012 | -0.0091 | 0.0086 | 0.3037 | 15.4901 | 0.8762 | -75.5442 |
| s_Bifidobacterium_breve           | Stroke              | Weighted median           | 24 | 1.0090 | 0.9899 | 1.0285 | 0.3600 | -0.0091 | 0.0086 | 0.3037 | 15.4901 | 0.8762 | -75.5442 |
| s_Bifidobacterium_breve           | Stroke              | Inverse variance weighted | 24 | 1.0147 | 1.0008 | 1.0288 | 0.0375 | -0.0091 | 0.0086 | 0.3037 | 15.4901 | 0.8762 | -75.5442 |
| s_Bifidobacterium_breve           | Stroke              | Simple mode               | 24 | 1.0011 | 0.9635 | 1.0401 | 0.9568 | -0.0091 | 0.0086 | 0.3037 | 15.4901 | 0.8762 | -75.5442 |
| s_Bifidobacterium_breve           | Stroke              | Weighted mode             | 24 | 1.0029 | 0.9681 | 1.0391 | 0.8725 | -0.0091 | 0.0086 | 0.3037 | 15.4901 | 0.8762 | -75.5442 |
| s_Bifidobacterium_catenuatum-Bifi | CardioEmbolicStroke | MR Egger                  | 14 | 1.0059 | 0.8266 | 1.2240 | 0.9543 | 0.0138  | 0.0409 | 0.7419 | 9.9026  | 0.6245 | -56.2419 |
| s_Bifidobacterium_catenuatum-Bifi | CardioEmbolicStroke | Weighted median           | 14 | 1.0111 | 0.9085 | 1.1253 | 0.8400 | 0.0138  | 0.0409 | 0.7419 | 9.9026  | 0.6245 | -56.2419 |
| s_Bifidobacterium_catenuatum-Bifi | CardioEmbolicStroke | Inverse variance weighted | 14 | 1.0377 | 0.9622 | 1.1191 | 0.3372 | 0.0138  | 0.0409 | 0.7419 | 9.9026  | 0.6245 | -56.2419 |
| s_Bifidobacterium_catenuatum-Bifi | CardioEmbolicStroke | Simple mode               | 14 | 1.0156 | 0.8582 | 1.2019 | 0.8595 | 0.0138  | 0.0409 | 0.7419 | 9.9026  | 0.6245 | -56.2419 |
| s_Bifidobacterium_catenuatum-Bifi | CardioEmbolicStroke | Weighted mode             | 14 | 1.0175 | 0.8703 | 1.1895 | 0.8312 | 0.0138  | 0.0409 | 0.7419 | 9.9026  | 0.6245 | -56.2419 |
| s_Bifidobacterium_catenuatum-Bifi | IschemicStroke      | MR Egger                  | 23 | 1.0003 | 0.9709 | 1.0306 | 0.9847 | 0.0014  | 0.0076 | 0.8595 | 28.8590 | 0.1174 | -31.6512 |
| s_Bifidobacterium_catenuatum-Bifi | IschemicStroke      | Weighted median           | 23 | 1.0001 | 0.9804 | 1.0203 | 0.9893 | 0.0014  | 0.0076 | 0.8595 | 28.8590 | 0.1174 | -31.6512 |
| s_Bifidobacterium_catenuatum-Bifi | IschemicStroke      | Inverse variance weighted | 23 | 1.0026 | 0.9874 | 1.0181 | 0.7374 | 0.0014  | 0.0076 | 0.8595 | 28.8590 | 0.1174 | -31.6512 |
| s_Bifidobacterium_catenuatum-Bifi | IschemicStroke      | Simple mode               | 23 | 1.0239 | 0.9860 | 1.0632 | 0.2333 | 0.0014  | 0.0076 | 0.8595 | 28.8590 | 0.1174 | -31.6512 |
| s_Bifidobacterium_catenuatum-Bifi | IschemicStroke      | Weighted mode             | 23 | 0.9952 | 0.9688 | 1.0222 | 0.7267 | 0.0014  | 0.0076 | 0.8595 | 28.8590 | 0.1174 | -31.6512 |
| s_Bifidobacterium_catenuatum-Bifi | LargeArteryStroke   | MR Egger                  | 18 | 1.0377 | 0.9440 | 1.1407 | 0.4550 | 0.0058  | 0.0230 | 0.8053 | 16.0136 | 0.4520 | -19.3942 |
| s_Bifidobacterium_catenuatum-Bifi | LargeArteryStroke   | Weighted median           | 18 | 1.0221 | 0.9567 | 1.0918 | 0.5174 | 0.0058  | 0.0230 | 0.8053 | 16.0136 | 0.4520 | -19.3942 |
| s_Bifidobacterium_catenuatum-Bifi | LargeArteryStroke   | Inverse variance weighted | 18 | 1.0486 | 1.0003 | 1.0993 | 0.0486 | 0.0058  | 0.0230 | 0.8053 | 16.0136 | 0.4520 | -19.3942 |
| s_Bifidobacterium_catenuatum-Bifi | LargeArteryStroke   | Simple mode               | 18 | 1.0396 | 0.9322 | 1.1593 | 0.4950 | 0.0058  | 0.0230 | 0.8053 | 16.0136 | 0.4520 | -19.3942 |
| s_Bifidobacterium_catenuatum-Bifi | LargeArteryStroke   | Weighted mode             | 18 | 1.0261 | 0.9430 | 1.1165 | 0.5576 | 0.0058  | 0.0230 | 0.8053 | 16.0136 | 0.4520 | -19.3942 |
| s_Bifidobacterium_catenuatum-Bifi | SmallVesselStroke   | MR Egger                  | 18 | 1.0123 | 0.9467 | 1.0824 | 0.7249 | -0.0038 | 0.0163 | 0.8187 | 25.9053 | 0.0554 | -38.4325 |
| s_Bifidobacterium_catenuatum-Bifi | SmallVesselStroke   | Weighted median           | 18 | 0.9970 | 0.9604 | 1.0350 | 0.8757 | -0.0038 | 0.0163 | 0.8187 | 25.9053 | 0.0554 | -38.4325 |
| s_Bifidobacterium_catenuatum-Bifi | SmallVesselStroke   | Inverse variance weighted | 18 | 1.0054 | 0.9732 | 1.0385 | 0.7472 | -0.0038 | 0.0163 | 0.8187 | 25.9053 | 0.0554 | -38.4325 |
| s_Bifidobacterium_catenuatum-Bifi | SmallVesselStroke   | Simple mode               | 18 | 0.9996 | 0.9367 | 1.0668 | 0.9912 | -0.0038 | 0.0163 | 0.8187 | 25.9053 | 0.0554 | -38.4325 |
| s_Bifidobacterium_catenuatum-Bifi | SmallVesselStroke   | Weighted mode             | 18 | 0.9935 | 0.9471 | 1.0422 | 0.7926 | -0.0038 | 0.0163 | 0.8187 | 25.9053 | 0.0554 | -38.4325 |
| s_Bifidobacterium_catenuatum-Bifi | Stroke              | MR Egger                  | 22 | 1.0083 | 0.9773 | 1.0402 | 0.6098 | -0.0046 | 0.0076 | 0.5528 | 32.2693 | 0.0405 | -36.7036 |
| s_Bifidobacterium_catenuatum-Bifi | Stroke              | Weighted median           | 22 | 1.0052 | 0.9879 | 1.0228 | 0.5602 | -0.0046 | 0.0076 | 0.5528 | 32.2693 | 0.0405 | -36.7036 |
| s_Bifidobacterium_catenuatum-Bifi | Stroke              | Inverse variance weighted | 22 | 0.9999 | 0.9850 | 1.0150 | 0.9859 | -0.0046 | 0.0076 | 0.5528 | 32.2693 | 0.0405 | -36.7036 |
| s_Bifidobacterium_catenuatum-Bifi | Stroke              | Simple mode               | 22 | 1.0203 | 0.9902 | 1.0514 | 0.2026 | -0.0046 | 0.0076 | 0.5528 | 32.2693 | 0.0405 | -36.7036 |
| s_Bifidobacterium_catenuatum-Bifi | Stroke              | Weighted mode             | 22 | 1.0144 | 0.9902 | 1.0393 | 0.2592 | -0.0046 | 0.0076 | 0.5528 | 32.2693 | 0.0405 | -36.7036 |

|                          |                     |                           |    |        |        |        |        |         |        |        |         |        |            |
|--------------------------|---------------------|---------------------------|----|--------|--------|--------|--------|---------|--------|--------|---------|--------|------------|
| s_Bifidobacterium_longum | CardioEmbolicStroke | MR Egger                  | 4  | 0.7967 | 0.4253 | 1.4926 | 0.5515 | 0.0720  | 0.1474 | 0.6733 | 5.3027  | 0.0706 | -9648.9030 |
| s_Bifidobacterium_longum | CardioEmbolicStroke | Weighted median           | 4  | 0.9274 | 0.7554 | 1.1386 | 0.4713 | 0.0720  | 0.1474 | 0.6733 | 5.3027  | 0.0706 | -9648.9030 |
| s_Bifidobacterium_longum | CardioEmbolicStroke | Inverse variance weighted | 4  | 0.9204 | 0.7455 | 1.1362 | 0.4400 | 0.0720  | 0.1474 | 0.6733 | 5.3027  | 0.0706 | -9648.9030 |
| s_Bifidobacterium_longum | CardioEmbolicStroke | Simple mode               | 4  | 1.0999 | 0.7717 | 1.5677 | 0.6348 | 0.0720  | 0.1474 | 0.6733 | 5.3027  | 0.0706 | -9648.9030 |
| s_Bifidobacterium_longum | CardioEmbolicStroke | Weighted mode             | 4  | 0.8775 | 0.7055 | 1.0915 | 0.3252 | 0.0720  | 0.1474 | 0.6733 | 5.3027  | 0.0706 | -9648.9030 |
| s_Bifidobacterium_longum | IschemicStroke      | MR Egger                  | 13 | 0.9830 | 0.9373 | 1.0308 | 0.4931 | 0.0028  | 0.0138 | 0.8439 | 7.9130  | 0.7211 | -49.5311   |
| s_Bifidobacterium_longum | IschemicStroke      | Weighted median           | 13 | 0.9942 | 0.9650 | 1.0242 | 0.7005 | 0.0028  | 0.0138 | 0.8439 | 7.9130  | 0.7211 | -49.5311   |
| s_Bifidobacterium_longum | IschemicStroke      | Inverse variance weighted | 13 | 0.9872 | 0.9649 | 1.0100 | 0.2684 | 0.0028  | 0.0138 | 0.8439 | 7.9130  | 0.7211 | -49.5311   |
| s_Bifidobacterium_longum | IschemicStroke      | Simple mode               | 13 | 0.9898 | 0.9472 | 1.0342 | 0.6540 | 0.0028  | 0.0138 | 0.8439 | 7.9130  | 0.7211 | -49.5311   |
| s_Bifidobacterium_longum | IschemicStroke      | Weighted mode             | 13 | 0.9954 | 0.9599 | 1.0321 | 0.8057 | 0.0028  | 0.0138 | 0.8439 | 7.9130  | 0.7211 | -49.5311   |
| s_Bifidobacterium_longum | LargeArteryStroke   | MR Egger                  | 7  | 1.0543 | 0.8066 | 1.3781 | 0.7147 | -0.0535 | 0.0656 | 0.4516 | 2.7764  | 0.7344 | -122.8610  |
| s_Bifidobacterium_longum | LargeArteryStroke   | Weighted median           | 7  | 0.9802 | 0.8558 | 1.1225 | 0.7721 | -0.0535 | 0.0656 | 0.4516 | 2.7764  | 0.7344 | -122.8610  |
| s_Bifidobacterium_longum | LargeArteryStroke   | Inverse variance weighted | 7  | 0.9510 | 0.8588 | 1.0531 | 0.3342 | -0.0535 | 0.0656 | 0.4516 | 2.7764  | 0.7344 | -122.8610  |
| s_Bifidobacterium_longum | LargeArteryStroke   | Simple mode               | 7  | 0.8831 | 0.7049 | 1.1063 | 0.3210 | -0.0535 | 0.0656 | 0.4516 | 2.7764  | 0.7344 | -122.8610  |
| s_Bifidobacterium_longum | LargeArteryStroke   | Weighted mode             | 7  | 0.9968 | 0.8601 | 1.1553 | 0.9673 | -0.0535 | 0.0656 | 0.4516 | 2.7764  | 0.7344 | -122.8610  |
| s_Bifidobacterium_longum | SmallVesselStroke   | MR Egger                  | 8  | 0.8901 | 0.7792 | 1.0167 | 0.1371 | 0.0499  | 0.0341 | 0.1942 | 6.3081  | 0.5043 | -84.2322   |
| s_Bifidobacterium_longum | SmallVesselStroke   | Weighted median           | 8  | 0.9825 | 0.9143 | 1.0557 | 0.6303 | 0.0499  | 0.0341 | 0.1942 | 6.3081  | 0.5043 | -84.2322   |
| s_Bifidobacterium_longum | SmallVesselStroke   | Inverse variance weighted | 8  | 0.9748 | 0.9245 | 1.0280 | 0.3465 | 0.0499  | 0.0341 | 0.1942 | 6.3081  | 0.5043 | -84.2322   |
| s_Bifidobacterium_longum | SmallVesselStroke   | Simple mode               | 8  | 0.9319 | 0.8335 | 1.0418 | 0.2547 | 0.0499  | 0.0341 | 0.1942 | 6.3081  | 0.5043 | -84.2322   |
| s_Bifidobacterium_longum | SmallVesselStroke   | Weighted mode             | 8  | 0.9748 | 0.9019 | 1.0535 | 0.5394 | 0.0499  | 0.0341 | 0.1942 | 6.3081  | 0.5043 | -84.2322   |
| s_Bifidobacterium_longum | Stroke              | MR Egger                  | 12 | 0.9845 | 0.9346 | 1.0371 | 0.5692 | 0.0012  | 0.0138 | 0.9340 | 8.7146  | 0.5594 | -99.1165   |
| s_Bifidobacterium_longum | Stroke              | Weighted median           | 12 | 0.9901 | 0.9610 | 1.0200 | 0.5109 | 0.0012  | 0.0138 | 0.9340 | 8.7146  | 0.5594 | -99.1165   |
| s_Bifidobacterium_longum | Stroke              | Inverse variance weighted | 12 | 0.9865 | 0.9653 | 1.0081 | 0.2198 | 0.0012  | 0.0138 | 0.9340 | 8.7146  | 0.5594 | -99.1165   |
| s_Bifidobacterium_longum | Stroke              | Simple mode               | 12 | 0.9891 | 0.9474 | 1.0328 | 0.6299 | 0.0012  | 0.0138 | 0.9340 | 8.7146  | 0.5594 | -99.1165   |
| s_Bifidobacterium_longum | Stroke              | Weighted mode             | 12 | 0.9912 | 0.9543 | 1.0296 | 0.6574 | 0.0012  | 0.0138 | 0.9340 | 8.7146  | 0.5594 | -99.1165   |
| s_Bilophila_wadsworthia  | CardioEmbolicStroke | MR Egger                  | 11 | 1.1384 | 0.7002 | 1.8508 | 0.6139 | -0.0774 | 0.1021 | 0.4677 | 18.2062 | 0.0329 | -21.4319   |
| s_Bilophila_wadsworthia  | CardioEmbolicStroke | Weighted median           | 11 | 1.0120 | 0.8647 | 1.1844 | 0.8818 | -0.0774 | 0.1021 | 0.4677 | 18.2062 | 0.0329 | -21.4319   |
| s_Bilophila_wadsworthia  | CardioEmbolicStroke | Inverse variance weighted | 11 | 0.9517 | 0.8235 | 1.0999 | 0.5025 | -0.0774 | 0.1021 | 0.4677 | 18.2062 | 0.0329 | -21.4319   |
| s_Bilophila_wadsworthia  | CardioEmbolicStroke | Simple mode               | 11 | 1.0417 | 0.7806 | 1.3902 | 0.7870 | -0.0774 | 0.1021 | 0.4677 | 18.2062 | 0.0329 | -21.4319   |
| s_Bilophila_wadsworthia  | CardioEmbolicStroke | Weighted mode             | 11 | 1.0278 | 0.7744 | 1.3642 | 0.8531 | -0.0774 | 0.1021 | 0.4677 | 18.2062 | 0.0329 | -21.4319   |
| s_Bilophila_wadsworthia  | IschemicStroke      | MR Egger                  | 43 | 1.0006 | 0.9829 | 1.0185 | 0.9515 | -0.0079 | 0.0073 | 0.2826 | 42.7389 | 0.4393 | -8.8279    |
| s_Bilophila_wadsworthia  | IschemicStroke      | Weighted median           | 43 | 0.9995 | 0.9844 | 1.0149 | 0.9537 | -0.0079 | 0.0073 | 0.2826 | 42.7389 | 0.4393 | -8.8279    |
| s_Bilophila_wadsworthia  | IschemicStroke      | Inverse variance weighted | 43 | 0.9925 | 0.9823 | 1.0028 | 0.1521 | -0.0079 | 0.0073 | 0.2826 | 42.7389 | 0.4393 | -8.8279    |
| s_Bilophila_wadsworthia  | IschemicStroke      | Simple mode               | 43 | 0.9989 | 0.9732 | 1.0253 | 0.9357 | -0.0079 | 0.0073 | 0.2826 | 42.7389 | 0.4393 | -8.8279    |
| s_Bilophila_wadsworthia  | IschemicStroke      | Weighted mode             | 43 | 1.0016 | 0.9828 | 1.0207 | 0.8693 | -0.0079 | 0.0073 | 0.2826 | 42.7389 | 0.4393 | -8.8279    |
| s_Bilophila_wadsworthia  | LargeArteryStroke   | MR Egger                  | 23 | 1.0173 | 0.9322 | 1.1103 | 0.7042 | -0.0135 | 0.0292 | 0.6474 | 26.1540 | 0.2006 | -3.2643    |
| s_Bilophila_wadsworthia  | LargeArteryStroke   | Weighted median           | 23 | 1.0264 | 0.9618 | 1.0952 | 0.4323 | -0.0135 | 0.0292 | 0.6474 | 26.1540 | 0.2006 | -3.2643    |
| s_Bilophila_wadsworthia  | LargeArteryStroke   | Inverse variance weighted | 23 | 1.0001 | 0.9529 | 1.0496 | 0.9980 | -0.0135 | 0.0292 | 0.6474 | 26.1540 | 0.2006 | -3.2643    |
| s_Bilophila_wadsworthia  | LargeArteryStroke   | Simple mode               | 23 | 0.9972 | 0.8980 | 1.1075 | 0.9593 | -0.0135 | 0.0292 | 0.6474 | 26.1540 | 0.2006 | -3.2643    |
| s_Bilophila_wadsworthia  | LargeArteryStroke   | Weighted mode             | 23 | 1.0189 | 0.9444 | 1.0993 | 0.6334 | -0.0135 | 0.0292 | 0.6474 | 26.1540 | 0.2006 | -3.2643    |
| s_Bilophila_wadsworthia  | SmallVesselStroke   | MR Egger                  | 27 | 1.0205 | 0.9844 | 1.0580 | 0.2798 | -0.0123 | 0.0135 | 0.3700 | 23.6034 | 0.5424 | -9.1586    |
| s_Bilophila_wadsworthia  | SmallVesselStroke   | Weighted median           | 27 | 1.0087 | 0.9788 | 1.0396 | 0.5721 | -0.0123 | 0.0135 | 0.3700 | 23.6034 | 0.5424 | -9.1586    |
| s_Bilophila_wadsworthia  | SmallVesselStroke   | Inverse variance weighted | 27 | 1.0068 | 0.9856 | 1.0285 | 0.5332 | -0.0123 | 0.0135 | 0.3700 | 23.6034 | 0.5424 | -9.1586    |
| s_Bilophila_wadsworthia  | SmallVesselStroke   | Simple mode               | 27 | 1.0026 | 0.9570 | 1.0503 | 0.9150 | -0.0123 | 0.0135 | 0.3700 | 23.6034 | 0.5424 | -9.1586    |
| s_Bilophila_wadsworthia  | SmallVesselStroke   | Weighted mode             | 27 | 1.0075 | 0.9703 | 1.0462 | 0.6988 | -0.0123 | 0.0135 | 0.3700 | 23.6034 | 0.5424 | -9.1586    |
| s_Bilophila_wadsworthia  | Stroke              | MR Egger                  | 40 | 0.9844 | 0.9604 | 1.0090 | 0.2198 | 0.0018  | 0.0083 | 0.8272 | 48.9228 | 0.1104 | -10.1642   |
| s_Bilophila_wadsworthia  | Stroke              | Weighted median           | 40 | 0.9918 | 0.9749 | 1.0090 | 0.3467 | 0.0018  | 0.0083 | 0.8272 | 48.9228 | 0.1104 | -10.1642   |
| s_Bilophila_wadsworthia  | Stroke              | Inverse variance weighted | 40 | 0.9868 | 0.9747 | 0.9990 | 0.0344 | 0.0018  | 0.0083 | 0.8272 | 48.9228 | 0.1104 | -10.1642   |
| s_Bilophila_wadsworthia  | Stroke              | Simple mode               | 40 | 1.0140 | 0.9772 | 1.0522 | 0.4642 | 0.0018  | 0.0083 | 0.8272 | 48.9228 | 0.1104 | -10.1642   |
| s_Bilophila_wadsworthia  | Stroke              | Weighted mode             | 40 | 1.0107 | 0.9736 | 1.0492 | 0.5799 | 0.0018  | 0.0083 | 0.8272 | 48.9228 | 0.1104 | -10.1642   |
| s_Blautia_hansenii       | CardioEmbolicStroke | MR Egger                  | 11 | 0.9424 | 0.6013 | 1.4769 | 0.8016 | 0.0328  | 0.0429 | 0.4635 | 7.1022  | 0.6265 | 670.7243   |
| s_Blautia_hansenii       | CardioEmbolicStroke | Weighted median           | 11 | 1.1281 | 0.8551 | 1.4884 | 0.3938 | 0.0328  | 0.0429 | 0.4635 | 7.1022  | 0.6265 | 670.7243   |
| s_Blautia_hansenii       | CardioEmbolicStroke | Inverse variance weighted | 11 | 1.1016 | 0.8971 | 1.3527 | 0.3556 | 0.0328  | 0.0429 | 0.4635 | 7.1022  | 0.6265 | 670.7243   |

|                             |                     |                           |    |        |        |        |        |         |        |        |         |        |            |
|-----------------------------|---------------------|---------------------------|----|--------|--------|--------|--------|---------|--------|--------|---------|--------|------------|
| s_Blautia_hansenii          | CardioEmbolicStroke | Simple mode               | 11 | 1.1388 | 0.7277 | 1.7821 | 0.5820 | 0.0328  | 0.0429 | 0.4635 | 7.1022  | 0.6265 | 670.7243   |
| s_Blautia_hansenii          | CardioEmbolicStroke | Weighted mode             | 11 | 1.1031 | 0.7252 | 1.6780 | 0.6563 | 0.0328  | 0.0429 | 0.4635 | 7.1022  | 0.6265 | 670.7243   |
| s_Blautia_hansenii          | IschemicStroke      | MR Egger                  | 21 | 1.0356 | 0.9680 | 1.1079 | 0.3228 | -0.0125 | 0.0084 | 0.1538 | 26.3092 | 0.1558 | -51.3157   |
| s_Blautia_hansenii          | IschemicStroke      | Weighted median           | 21 | 0.9859 | 0.9354 | 1.0392 | 0.5974 | -0.0125 | 0.0084 | 0.1538 | 26.3092 | 0.1558 | -51.3157   |
| s_Blautia_hansenii          | IschemicStroke      | Inverse variance weighted | 21 | 0.9929 | 0.9544 | 1.0330 | 0.7244 | -0.0125 | 0.0084 | 0.1538 | 26.3092 | 0.1558 | -51.3157   |
| s_Blautia_hansenii          | IschemicStroke      | Simple mode               | 21 | 0.9817 | 0.8997 | 1.0713 | 0.6834 | -0.0125 | 0.0084 | 0.1538 | 26.3092 | 0.1558 | -51.3157   |
| s_Blautia_hansenii          | IschemicStroke      | Weighted mode             | 21 | 0.9771 | 0.8955 | 1.0662 | 0.6088 | -0.0125 | 0.0084 | 0.1538 | 26.3092 | 0.1558 | -51.3157   |
| s_Blautia_hansenii          | LargeArteryStroke   | MR Egger                  | 17 | 0.9330 | 0.7570 | 1.1499 | 0.5252 | 0.0033  | 0.0249 | 0.8977 | 9.4725  | 0.8515 | -41.2596   |
| s_Blautia_hansenii          | LargeArteryStroke   | Weighted median           | 17 | 0.9978 | 0.8416 | 1.1831 | 0.9800 | 0.0033  | 0.0249 | 0.8977 | 9.4725  | 0.8515 | -41.2596   |
| s_Blautia_hansenii          | LargeArteryStroke   | Inverse variance weighted | 17 | 0.9438 | 0.8387 | 1.0621 | 0.3369 | 0.0033  | 0.0249 | 0.8977 | 9.4725  | 0.8515 | -41.2596   |
| s_Blautia_hansenii          | LargeArteryStroke   | Simple mode               | 17 | 1.0579 | 0.7878 | 1.4204 | 0.7132 | 0.0033  | 0.0249 | 0.8977 | 9.4725  | 0.8515 | -41.2596   |
| s_Blautia_hansenii          | LargeArteryStroke   | Weighted mode             | 17 | 1.0551 | 0.7947 | 1.4009 | 0.7156 | 0.0033  | 0.0249 | 0.8977 | 9.4725  | 0.8515 | -41.2596   |
| s_Blautia_hansenii          | SmallVesselStroke   | MR Egger                  | 17 | 1.0487 | 0.9346 | 1.1769 | 0.4311 | -0.0213 | 0.0138 | 0.1429 | 16.1044 | 0.4457 | -127.0824  |
| s_Blautia_hansenii          | SmallVesselStroke   | Weighted median           | 17 | 0.9937 | 0.9073 | 1.0883 | 0.8919 | -0.0213 | 0.0138 | 0.1429 | 16.1044 | 0.4457 | -127.0824  |
| s_Blautia_hansenii          | SmallVesselStroke   | Inverse variance weighted | 17 | 0.9730 | 0.9114 | 1.0388 | 0.4120 | -0.0213 | 0.0138 | 0.1429 | 16.1044 | 0.4457 | -127.0824  |
| s_Blautia_hansenii          | SmallVesselStroke   | Simple mode               | 17 | 1.0079 | 0.8777 | 1.1574 | 0.9129 | -0.0213 | 0.0138 | 0.1429 | 16.1044 | 0.4457 | -127.0824  |
| s_Blautia_hansenii          | SmallVesselStroke   | Weighted mode             | 17 | 1.0100 | 0.8917 | 1.1439 | 0.8776 | -0.0213 | 0.0138 | 0.1429 | 16.1044 | 0.4457 | -127.0824  |
| s_Blautia_hansenii          | Stroke              | MR Egger                  | 19 | 0.9963 | 0.9252 | 1.0729 | 0.9231 | -0.0023 | 0.0083 | 0.7818 | 21.5884 | 0.2011 | -218.8300  |
| s_Blautia_hansenii          | Stroke              | Weighted median           | 19 | 0.9984 | 0.9504 | 1.0489 | 0.9505 | -0.0023 | 0.0083 | 0.7818 | 21.5884 | 0.2011 | -218.8300  |
| s_Blautia_hansenii          | Stroke              | Inverse variance weighted | 19 | 0.9872 | 0.9516 | 1.0242 | 0.4931 | -0.0023 | 0.0083 | 0.7818 | 21.5884 | 0.2011 | -218.8300  |
| s_Blautia_hansenii          | Stroke              | Simple mode               | 19 | 1.0428 | 0.9507 | 1.1438 | 0.3858 | -0.0023 | 0.0083 | 0.7818 | 21.5884 | 0.2011 | -218.8300  |
| s_Blautia_hansenii          | Stroke              | Weighted mode             | 19 | 1.0024 | 0.9273 | 1.0835 | 0.9531 | -0.0023 | 0.0083 | 0.7818 | 21.5884 | 0.2011 | -218.8300  |
| s_Blautia_hydrogenotrophica | CardioEmbolicStroke | MR Egger                  | 5  | 1.1073 | 0.3082 | 3.9784 | 0.8858 | -0.0022 | 0.1178 | 0.9862 | 5.4681  | 0.1406 | 14.8977    |
| s_Blautia_hydrogenotrophica | CardioEmbolicStroke | Weighted median           | 5  | 1.1898 | 0.7980 | 1.7739 | 0.3937 | -0.0022 | 0.1178 | 0.9862 | 5.4681  | 0.1406 | 14.8977    |
| s_Blautia_hydrogenotrophica | CardioEmbolicStroke | Inverse variance weighted | 5  | 1.0944 | 0.7884 | 1.5191 | 0.5897 | -0.0022 | 0.1178 | 0.9862 | 5.4681  | 0.1406 | 14.8977    |
| s_Blautia_hydrogenotrophica | CardioEmbolicStroke | Simple mode               | 5  | 1.3264 | 0.6896 | 2.5510 | 0.4450 | -0.0022 | 0.1178 | 0.9862 | 5.4681  | 0.1406 | 14.8977    |
| s_Blautia_hydrogenotrophica | CardioEmbolicStroke | Weighted mode             | 5  | 1.3629 | 0.7298 | 2.5450 | 0.3863 | -0.0022 | 0.1178 | 0.9862 | 5.4681  | 0.1406 | 14.8977    |
| s_Blautia_hydrogenotrophica | IschemicStroke      | MR Egger                  | 11 | 0.9999 | 0.9074 | 1.1018 | 0.9983 | -0.0052 | 0.0114 | 0.6585 | 5.9677  | 0.7431 | -2154.0984 |
| s_Blautia_hydrogenotrophica | IschemicStroke      | Weighted median           | 11 | 1.0180 | 0.9576 | 1.0822 | 0.5669 | -0.0052 | 0.0114 | 0.6585 | 5.9677  | 0.7431 | -2154.0984 |
| s_Blautia_hydrogenotrophica | IschemicStroke      | Inverse variance weighted | 11 | 0.9801 | 0.9366 | 1.0256 | 0.3850 | -0.0052 | 0.0114 | 0.6585 | 5.9677  | 0.7431 | -2154.0984 |
| s_Blautia_hydrogenotrophica | IschemicStroke      | Simple mode               | 11 | 1.0230 | 0.9277 | 1.1280 | 0.6587 | -0.0052 | 0.0114 | 0.6585 | 5.9677  | 0.7431 | -2154.0984 |
| s_Blautia_hydrogenotrophica | IschemicStroke      | Weighted mode             | 11 | 1.0225 | 0.9385 | 1.1140 | 0.6218 | -0.0052 | 0.0114 | 0.6585 | 5.9677  | 0.7431 | -2154.0984 |
| s_Blautia_hydrogenotrophica | LargeArteryStroke   | MR Egger                  | 9  | 0.8518 | 0.5767 | 1.2580 | 0.4466 | 0.0638  | 0.0460 | 0.2085 | 13.1716 | 0.1061 | -323.0130  |
| s_Blautia_hydrogenotrophica | LargeArteryStroke   | Weighted median           | 9  | 1.0231 | 0.8276 | 1.2648 | 0.8327 | 0.0638  | 0.0460 | 0.2085 | 13.1716 | 0.1061 | -323.0130  |
| s_Blautia_hydrogenotrophica | LargeArteryStroke   | Inverse variance weighted | 9  | 1.0831 | 0.8852 | 1.3253 | 0.4379 | 0.0638  | 0.0460 | 0.2085 | 13.1716 | 0.1061 | -323.0130  |
| s_Blautia_hydrogenotrophica | LargeArteryStroke   | Simple mode               | 9  | 0.9998 | 0.7160 | 1.3962 | 0.9992 | 0.0638  | 0.0460 | 0.2085 | 13.1716 | 0.1061 | -323.0130  |
| s_Blautia_hydrogenotrophica | LargeArteryStroke   | Weighted mode             | 9  | 0.9925 | 0.7377 | 1.3354 | 0.9615 | 0.0638  | 0.0460 | 0.2085 | 13.1716 | 0.1061 | -323.0130  |
| s_Blautia_hydrogenotrophica | SmallVesselStroke   | MR Egger                  | 9  | 1.0551 | 0.8109 | 1.3727 | 0.7017 | -0.0073 | 0.0313 | 0.8217 | 15.6200 | 0.0288 | -899.9278  |
| s_Blautia_hydrogenotrophica | SmallVesselStroke   | Weighted median           | 9  | 1.0815 | 0.9542 | 1.2259 | 0.2199 | -0.0073 | 0.0313 | 0.8217 | 15.6200 | 0.0288 | -899.9278  |
| s_Blautia_hydrogenotrophica | SmallVesselStroke   | Inverse variance weighted | 9  | 1.0266 | 0.9095 | 1.1587 | 0.6713 | -0.0073 | 0.0313 | 0.8217 | 15.6200 | 0.0288 | -899.9278  |
| s_Blautia_hydrogenotrophica | SmallVesselStroke   | Simple mode               | 9  | 1.1125 | 0.9269 | 1.3352 | 0.2852 | -0.0073 | 0.0313 | 0.8217 | 15.6200 | 0.0288 | -899.9278  |
| s_Blautia_hydrogenotrophica | SmallVesselStroke   | Weighted mode             | 9  | 1.1125 | 0.9390 | 1.3181 | 0.2527 | -0.0073 | 0.0313 | 0.8217 | 15.6200 | 0.0288 | -899.9278  |
| s_Blautia_hydrogenotrophica | Stroke              | MR Egger                  | 11 | 1.0152 | 0.9313 | 1.1067 | 0.7397 | -0.0112 | 0.0099 | 0.2897 | 5.6448  | 0.8442 | -3293.8852 |
| s_Blautia_hydrogenotrophica | Stroke              | Weighted median           | 11 | 0.9851 | 0.9338 | 1.0391 | 0.5809 | -0.0112 | 0.0099 | 0.2897 | 5.6448  | 0.8442 | -3293.8852 |
| s_Blautia_hydrogenotrophica | Stroke              | Inverse variance weighted | 11 | 0.9715 | 0.9337 | 1.0108 | 0.1532 | -0.0112 | 0.0099 | 0.2897 | 5.6448  | 0.8442 | -3293.8852 |
| s_Blautia_hydrogenotrophica | Stroke              | Simple mode               | 11 | 0.9931 | 0.9107 | 1.0831 | 0.8795 | -0.0112 | 0.0099 | 0.2897 | 5.6448  | 0.8442 | -3293.8852 |
| s_Blautia_hydrogenotrophica | Stroke              | Weighted mode             | 11 | 1.0033 | 0.9277 | 1.0851 | 0.9360 | -0.0112 | 0.0099 | 0.2897 | 5.6448  | 0.8442 | -3293.8852 |
| s_Butyriivibrio_crossotus   | CardioEmbolicStroke | MR Egger                  | 10 | 0.7696 | 0.2673 | 2.2159 | 0.6405 | 0.0601  | 0.1086 | 0.5950 | 6.4055  | 0.6019 | 105.8956   |
| s_Butyriivibrio_crossotus   | CardioEmbolicStroke | Weighted median           | 10 | 1.0574 | 0.8422 | 1.3275 | 0.6307 | 0.0601  | 0.1086 | 0.5950 | 6.4055  | 0.6019 | 105.8956   |
| s_Butyriivibrio_crossotus   | CardioEmbolicStroke | Inverse variance weighted | 10 | 1.0331 | 0.8656 | 1.2331 | 0.7181 | 0.0601  | 0.1086 | 0.5950 | 6.4055  | 0.6019 | 105.8956   |
| s_Butyriivibrio_crossotus   | CardioEmbolicStroke | Simple mode               | 10 | 0.9142 | 0.6263 | 1.3346 | 0.6533 | 0.0601  | 0.1086 | 0.5950 | 6.4055  | 0.6019 | 105.8956   |
| s_Butyriivibrio_crossotus   | CardioEmbolicStroke | Weighted mode             | 10 | 0.9263 | 0.6391 | 1.3426 | 0.6954 | 0.0601  | 0.1086 | 0.5950 | 6.4055  | 0.6019 | 105.8956   |
| s_Butyriivibrio_crossotus   | IschemicStroke      | MR Egger                  | 17 | 0.9444 | 0.8797 | 1.0138 | 0.1348 | 0.0116  | 0.0091 | 0.2186 | 9.3477  | 0.8984 | -190.7448  |

|                          |                     |                           |    |        |        |        |        |         |        |        |         |        |            |
|--------------------------|---------------------|---------------------------|----|--------|--------|--------|--------|---------|--------|--------|---------|--------|------------|
| s_Butyrivibrio_crossotus | IschemicStroke      | Weighted median           | 17 | 0.9821 | 0.9414 | 1.0245 | 0.4018 | 0.0116  | 0.0091 | 0.2186 | 9.3477  | 0.8984 | -190.7448  |
| s_Butyrivibrio_crossotus | IschemicStroke      | Inverse variance weighted | 17 | 0.9845 | 0.9538 | 1.0162 | 0.3335 | 0.0116  | 0.0091 | 0.2186 | 9.3477  | 0.8984 | -190.7448  |
| s_Butyrivibrio_crossotus | IschemicStroke      | Simple mode               | 17 | 0.9910 | 0.9248 | 1.0620 | 0.8012 | 0.0116  | 0.0091 | 0.2186 | 9.3477  | 0.8984 | -190.7448  |
| s_Butyrivibrio_crossotus | IschemicStroke      | Weighted mode             | 17 | 0.9743 | 0.9156 | 1.0368 | 0.4239 | 0.0116  | 0.0091 | 0.2186 | 9.3477  | 0.8984 | -190.7448  |
| s_Butyrivibrio_crossotus | LargeArteryStroke   | MR Egger                  | 15 | 0.7750 | 0.6020 | 0.9977 | 0.0696 | 0.0288  | 0.0311 | 0.3711 | 8.6610  | 0.8521 | -36.0823   |
| s_Butyrivibrio_crossotus | LargeArteryStroke   | Weighted median           | 15 | 0.8589 | 0.7445 | 0.9909 | 0.0370 | 0.0288  | 0.0311 | 0.3711 | 8.6610  | 0.8521 | -36.0823   |
| s_Butyrivibrio_crossotus | LargeArteryStroke   | Inverse variance weighted | 15 | 0.8635 | 0.7759 | 0.9611 | 0.0072 | 0.0288  | 0.0311 | 0.3711 | 8.6610  | 0.8521 | -36.0823   |
| s_Butyrivibrio_crossotus | LargeArteryStroke   | Simple mode               | 15 | 0.8342 | 0.6380 | 1.0908 | 0.2064 | 0.0288  | 0.0311 | 0.3711 | 8.6610  | 0.8521 | -36.0823   |
| s_Butyrivibrio_crossotus | LargeArteryStroke   | Weighted mode             | 15 | 0.8065 | 0.6269 | 1.0376 | 0.1166 | 0.0288  | 0.0311 | 0.3711 | 8.6610  | 0.8521 | -36.0823   |
| s_Butyrivibrio_crossotus | SmallVesselStroke   | MR Egger                  | 15 | 0.8831 | 0.7658 | 1.0183 | 0.1108 | 0.0126  | 0.0175 | 0.4843 | 12.0974 | 0.5197 | -121.2523  |
| s_Butyrivibrio_crossotus | SmallVesselStroke   | Weighted median           | 15 | 0.9185 | 0.8439 | 0.9996 | 0.0490 | 0.0126  | 0.0175 | 0.4843 | 12.0974 | 0.5197 | -121.2523  |
| s_Butyrivibrio_crossotus | SmallVesselStroke   | Inverse variance weighted | 15 | 0.9260 | 0.8722 | 0.9832 | 0.0119 | 0.0126  | 0.0175 | 0.4843 | 12.0974 | 0.5197 | -121.2523  |
| s_Butyrivibrio_crossotus | SmallVesselStroke   | Simple mode               | 15 | 0.9530 | 0.8266 | 1.0987 | 0.5179 | 0.0126  | 0.0175 | 0.4843 | 12.0974 | 0.5197 | -121.2523  |
| s_Butyrivibrio_crossotus | SmallVesselStroke   | Weighted mode             | 15 | 0.8931 | 0.7855 | 1.0156 | 0.1067 | 0.0126  | 0.0175 | 0.4843 | 12.0974 | 0.5197 | -121.2523  |
| s_Butyrivibrio_crossotus | Stroke              | MR Egger                  | 16 | 0.9596 | 0.8956 | 1.0282 | 0.2617 | 0.0081  | 0.0085 | 0.3565 | 6.8209  | 0.9624 | -437.6595  |
| s_Butyrivibrio_crossotus | Stroke              | Weighted median           | 16 | 0.9870 | 0.9516 | 1.0236 | 0.4801 | 0.0081  | 0.0085 | 0.3565 | 6.8209  | 0.9624 | -437.6595  |
| s_Butyrivibrio_crossotus | Stroke              | Inverse variance weighted | 16 | 0.9895 | 0.9622 | 1.0177 | 0.4630 | 0.0081  | 0.0085 | 0.3565 | 6.8209  | 0.9624 | -437.6595  |
| s_Butyrivibrio_crossotus | Stroke              | Simple mode               | 16 | 0.9777 | 0.9210 | 1.0380 | 0.4723 | 0.0081  | 0.0085 | 0.3565 | 6.8209  | 0.9624 | -437.6595  |
| s_Butyrivibrio_crossotus | Stroke              | Weighted mode             | 16 | 0.9818 | 0.9235 | 1.0438 | 0.5658 | 0.0081  | 0.0085 | 0.3565 | 6.8209  | 0.9624 | -437.6595  |
| s_Campylobacter_jejuni   | CardioEmbolicStroke | MR Egger                  | 12 | 1.1477 | 0.7925 | 1.6621 | 0.4827 | -0.0456 | 0.0528 | 0.4077 | 5.3235  | 0.9145 | -1732.5798 |
| s_Campylobacter_jejuni   | CardioEmbolicStroke | Weighted median           | 12 | 1.0148 | 0.8614 | 1.1955 | 0.8604 | -0.0456 | 0.0528 | 0.4077 | 5.3235  | 0.9145 | -1732.5798 |
| s_Campylobacter_jejuni   | CardioEmbolicStroke | Inverse variance weighted | 12 | 0.9842 | 0.8682 | 1.1158 | 0.8041 | -0.0456 | 0.0528 | 0.4077 | 5.3235  | 0.9145 | -1732.5798 |
| s_Campylobacter_jejuni   | CardioEmbolicStroke | Simple mode               | 12 | 1.0461 | 0.7969 | 1.3732 | 0.7514 | -0.0456 | 0.0528 | 0.4077 | 5.3235  | 0.9145 | -1732.5798 |
| s_Campylobacter_jejuni   | CardioEmbolicStroke | Weighted mode             | 12 | 1.0350 | 0.8170 | 1.3113 | 0.7807 | -0.0456 | 0.0528 | 0.4077 | 5.3235  | 0.9145 | -1732.5798 |
| s_Campylobacter_jejuni   | IschemicStroke      | MR Egger                  | 22 | 1.0079 | 0.9586 | 1.0597 | 0.7622 | -0.0030 | 0.0084 | 0.7221 | 24.0370 | 0.2408 | -40.9721   |
| s_Campylobacter_jejuni   | IschemicStroke      | Weighted median           | 22 | 1.0059 | 0.9748 | 1.0380 | 0.7135 | -0.0030 | 0.0084 | 0.7221 | 24.0370 | 0.2408 | -40.9721   |
| s_Campylobacter_jejuni   | IschemicStroke      | Inverse variance weighted | 22 | 0.9998 | 0.9762 | 1.0239 | 0.9856 | -0.0030 | 0.0084 | 0.7221 | 24.0370 | 0.2408 | -40.9721   |
| s_Campylobacter_jejuni   | IschemicStroke      | Simple mode               | 22 | 1.0138 | 0.9645 | 1.0656 | 0.5956 | -0.0030 | 0.0084 | 0.7221 | 24.0370 | 0.2408 | -40.9721   |
| s_Campylobacter_jejuni   | IschemicStroke      | Weighted mode             | 22 | 1.0023 | 0.9623 | 1.0440 | 0.9134 | -0.0030 | 0.0084 | 0.7221 | 24.0370 | 0.2408 | -40.9721   |
| s_Campylobacter_jejuni   | LargeArteryStroke   | MR Egger                  | 18 | 1.0352 | 0.8069 | 1.3280 | 0.7890 | 0.0022  | 0.0391 | 0.9551 | 22.3027 | 0.1337 | -24.0143   |
| s_Campylobacter_jejuni   | LargeArteryStroke   | Weighted median           | 18 | 0.9562 | 0.8441 | 1.0832 | 0.4816 | 0.0022  | 0.0391 | 0.9551 | 22.3027 | 0.1337 | -24.0143   |
| s_Campylobacter_jejuni   | LargeArteryStroke   | Inverse variance weighted | 18 | 1.0421 | 0.9493 | 1.1441 | 0.3858 | 0.0022  | 0.0391 | 0.9551 | 22.3027 | 0.1337 | -24.0143   |
| s_Campylobacter_jejuni   | LargeArteryStroke   | Simple mode               | 18 | 0.9368 | 0.7502 | 1.1698 | 0.5721 | 0.0022  | 0.0391 | 0.9551 | 22.3027 | 0.1337 | -24.0143   |
| s_Campylobacter_jejuni   | LargeArteryStroke   | Weighted mode             | 18 | 0.9391 | 0.7992 | 1.1035 | 0.4557 | 0.0022  | 0.0391 | 0.9551 | 22.3027 | 0.1337 | -24.0143   |
| s_Campylobacter_jejuni   | SmallVesselStroke   | MR Egger                  | 18 | 0.9674 | 0.8573 | 1.0916 | 0.5982 | -0.0005 | 0.0189 | 0.9807 | 16.7139 | 0.4043 | -55.2698   |
| s_Campylobacter_jejuni   | SmallVesselStroke   | Weighted median           | 18 | 0.9457 | 0.8859 | 1.0095 | 0.0939 | -0.0005 | 0.0189 | 0.9807 | 16.7139 | 0.4043 | -55.2698   |
| s_Campylobacter_jejuni   | SmallVesselStroke   | Inverse variance weighted | 18 | 0.9661 | 0.9232 | 1.0108 | 0.1353 | -0.0005 | 0.0189 | 0.9807 | 16.7139 | 0.4043 | -55.2698   |
| s_Campylobacter_jejuni   | SmallVesselStroke   | Simple mode               | 18 | 0.9417 | 0.8365 | 1.0602 | 0.3345 | -0.0005 | 0.0189 | 0.9807 | 16.7139 | 0.4043 | -55.2698   |
| s_Campylobacter_jejuni   | SmallVesselStroke   | Weighted mode             | 18 | 0.9417 | 0.8487 | 1.0450 | 0.2737 | -0.0005 | 0.0189 | 0.9807 | 16.7139 | 0.4043 | -55.2698   |
| s_Campylobacter_jejuni   | Stroke              | MR Egger                  | 23 | 0.9921 | 0.9342 | 1.0536 | 0.7984 | 0.0016  | 0.0092 | 0.8672 | 29.7437 | 0.0973 | -36.5461   |
| s_Campylobacter_jejuni   | Stroke              | Weighted median           | 23 | 1.0082 | 0.9799 | 1.0373 | 0.5736 | 0.0016  | 0.0092 | 0.8672 | 29.7437 | 0.0973 | -36.5461   |
| s_Campylobacter_jejuni   | Stroke              | Inverse variance weighted | 23 | 0.9968 | 0.9736 | 1.0206 | 0.7914 | 0.0016  | 0.0092 | 0.8672 | 29.7437 | 0.0973 | -36.5461   |
| s_Campylobacter_jejuni   | Stroke              | Simple mode               | 23 | 1.0157 | 0.9671 | 1.0668 | 0.5395 | 0.0016  | 0.0092 | 0.8672 | 29.7437 | 0.0973 | -36.5461   |
| s_Campylobacter_jejuni   | Stroke              | Weighted mode             | 23 | 1.0148 | 0.9711 | 1.0606 | 0.5189 | 0.0016  | 0.0092 | 0.8672 | 29.7437 | 0.0973 | -36.5461   |
| s_Citrobacter_koseri     | CardioEmbolicStroke | MR Egger                  | 10 | 0.7887 | 0.4516 | 1.3773 | 0.4282 | 0.1032  | 0.1164 | 0.4014 | 7.3945  | 0.4947 | -162.8850  |
| s_Citrobacter_koseri     | CardioEmbolicStroke | Weighted median           | 10 | 1.0115 | 0.8800 | 1.1626 | 0.8724 | 0.1032  | 0.1164 | 0.4014 | 7.3945  | 0.4947 | -162.8850  |
| s_Citrobacter_koseri     | CardioEmbolicStroke | Inverse variance weighted | 10 | 1.0101 | 0.9087 | 1.1229 | 0.8518 | 0.1032  | 0.1164 | 0.4014 | 7.3945  | 0.4947 | -162.8850  |
| s_Citrobacter_koseri     | CardioEmbolicStroke | Simple mode               | 10 | 1.0195 | 0.8043 | 1.2923 | 0.8765 | 0.1032  | 0.1164 | 0.4014 | 7.3945  | 0.4947 | -162.8850  |
| s_Citrobacter_koseri     | CardioEmbolicStroke | Weighted mode             | 10 | 1.0130 | 0.8105 | 1.2661 | 0.9119 | 0.1032  | 0.1164 | 0.4014 | 7.3945  | 0.4947 | -162.8850  |
| s_Citrobacter_koseri     | IschemicStroke      | MR Egger                  | 13 | 1.0325 | 0.9769 | 1.0914 | 0.2817 | -0.0121 | 0.0129 | 0.3661 | 8.3442  | 0.6822 | -105.0473  |
| s_Citrobacter_koseri     | IschemicStroke      | Weighted median           | 13 | 1.0080 | 0.9798 | 1.0371 | 0.5813 | -0.0121 | 0.0129 | 0.3661 | 8.3442  | 0.6822 | -105.0473  |
| s_Citrobacter_koseri     | IschemicStroke      | Inverse variance weighted | 13 | 1.0073 | 0.9867 | 1.0284 | 0.4904 | -0.0121 | 0.0129 | 0.3661 | 8.3442  | 0.6822 | -105.0473  |
| s_Citrobacter_koseri     | IschemicStroke      | Simple mode               | 13 | 1.0019 | 0.9558 | 1.0502 | 0.9378 | -0.0121 | 0.0129 | 0.3661 | 8.3442  | 0.6822 | -105.0473  |

|                                 |                     |                           |    |        |        |        |        |         |        |        |         |        |           |
|---------------------------------|---------------------|---------------------------|----|--------|--------|--------|--------|---------|--------|--------|---------|--------|-----------|
| s_Citrobacter_koseri            | IschemicStroke      | Weighted mode             | 13 | 1.0254 | 0.9829 | 1.0697 | 0.2686 | -0.0121 | 0.0129 | 0.3661 | 8.3442  | 0.6822 | -105.0473 |
| s_Citrobacter_koseri            | LargeArteryStroke   | MR Egger                  | 10 | 0.8305 | 0.5481 | 1.2584 | 0.4066 | 0.0680  | 0.0869 | 0.4561 | 7.6124  | 0.4722 | -190.3736 |
| s_Citrobacter_koseri            | LargeArteryStroke   | Weighted median           | 10 | 0.9465 | 0.8499 | 1.0539 | 0.3159 | 0.0680  | 0.0869 | 0.4561 | 7.6124  | 0.4722 | -190.3736 |
| s_Citrobacter_koseri            | LargeArteryStroke   | Inverse variance weighted | 10 | 0.9776 | 0.9036 | 1.0577 | 0.5728 | 0.0680  | 0.0869 | 0.4561 | 7.6124  | 0.4722 | -190.3736 |
| s_Citrobacter_koseri            | LargeArteryStroke   | Simple mode               | 10 | 0.8880 | 0.7281 | 1.0829 | 0.2706 | 0.0680  | 0.0869 | 0.4561 | 7.6124  | 0.4722 | -190.3736 |
| s_Citrobacter_koseri            | LargeArteryStroke   | Weighted mode             | 10 | 0.8973 | 0.7412 | 1.0863 | 0.2953 | 0.0680  | 0.0869 | 0.4561 | 7.6124  | 0.4722 | -190.3736 |
| s_Citrobacter_koseri            | SmallVesselStroke   | MR Egger                  | 10 | 1.2379 | 0.9577 | 1.6001 | 0.1418 | -0.0790 | 0.0536 | 0.1789 | 12.5500 | 0.1840 | -388.1531 |
| s_Citrobacter_koseri            | SmallVesselStroke   | Weighted median           | 10 | 1.0146 | 0.9521 | 1.0812 | 0.6549 | -0.0790 | 0.0536 | 0.1789 | 12.5500 | 0.1840 | -388.1531 |
| s_Citrobacter_koseri            | SmallVesselStroke   | Inverse variance weighted | 10 | 1.0243 | 0.9726 | 1.0788 | 0.3640 | -0.0790 | 0.0536 | 0.1789 | 12.5500 | 0.1840 | -388.1531 |
| s_Citrobacter_koseri            | SmallVesselStroke   | Simple mode               | 10 | 1.0748 | 0.9550 | 1.2097 | 0.2622 | -0.0790 | 0.0536 | 0.1789 | 12.5500 | 0.1840 | -388.1531 |
| s_Citrobacter_koseri            | SmallVesselStroke   | Weighted mode             | 10 | 0.9697 | 0.8609 | 1.0922 | 0.6243 | -0.0790 | 0.0536 | 0.1789 | 12.5500 | 0.1840 | -388.1531 |
| s_Citrobacter_koseri            | Stroke              | MR Egger                  | 13 | 1.0258 | 0.9364 | 1.1237 | 0.5949 | -0.0113 | 0.0189 | 0.5622 | 10.0528 | 0.5256 | -344.6523 |
| s_Citrobacter_koseri            | Stroke              | Weighted median           | 13 | 1.0037 | 0.9778 | 1.0302 | 0.7819 | -0.0113 | 0.0189 | 0.5622 | 10.0528 | 0.5256 | -344.6523 |
| s_Citrobacter_koseri            | Stroke              | Inverse variance weighted | 13 | 0.9983 | 0.9793 | 1.0176 | 0.8620 | -0.0113 | 0.0189 | 0.5622 | 10.0528 | 0.5256 | -344.6523 |
| s_Citrobacter_koseri            | Stroke              | Simple mode               | 13 | 1.0023 | 0.9546 | 1.0523 | 0.9289 | -0.0113 | 0.0189 | 0.5622 | 10.0528 | 0.5256 | -344.6523 |
| s_Citrobacter_koseri            | Stroke              | Weighted mode             | 13 | 1.0057 | 0.9594 | 1.0542 | 0.8183 | -0.0113 | 0.0189 | 0.5622 | 10.0528 | 0.5256 | -344.6523 |
| s_Citrobacter_youngae           | CardioEmbolicStroke | MR Egger                  | 14 | 1.0509 | 0.9081 | 1.2161 | 0.5181 | -0.0177 | 0.0410 | 0.6740 | 18.0085 | 0.1154 | -20.8060  |
| s_Citrobacter_youngae           | CardioEmbolicStroke | Weighted median           | 14 | 1.0520 | 0.9637 | 1.1483 | 0.2572 | -0.0177 | 0.0410 | 0.6740 | 18.0085 | 0.1154 | -20.8060  |
| s_Citrobacter_youngae           | CardioEmbolicStroke | Inverse variance weighted | 14 | 1.0214 | 0.9567 | 1.0904 | 0.5268 | -0.0177 | 0.0410 | 0.6740 | 18.0085 | 0.1154 | -20.8060  |
| s_Citrobacter_youngae           | CardioEmbolicStroke | Simple mode               | 14 | 1.0321 | 0.8882 | 1.1994 | 0.6869 | -0.0177 | 0.0410 | 0.6740 | 18.0085 | 0.1154 | -20.8060  |
| s_Citrobacter_youngae           | CardioEmbolicStroke | Weighted mode             | 14 | 1.0494 | 0.9559 | 1.1520 | 0.3301 | -0.0177 | 0.0410 | 0.6740 | 18.0085 | 0.1154 | -20.8060  |
| s_Citrobacter_youngae           | IschemicStroke      | MR Egger                  | 16 | 0.9886 | 0.9595 | 1.0185 | 0.4623 | 0.0048  | 0.0084 | 0.5784 | 17.3219 | 0.2394 | -131.8617 |
| s_Citrobacter_youngae           | IschemicStroke      | Weighted median           | 16 | 0.9943 | 0.9754 | 1.0135 | 0.5569 | 0.0048  | 0.0084 | 0.5784 | 17.3219 | 0.2394 | -131.8617 |
| s_Citrobacter_youngae           | IschemicStroke      | Inverse variance weighted | 16 | 0.9962 | 0.9829 | 1.0097 | 0.5777 | 0.0048  | 0.0084 | 0.5784 | 17.3219 | 0.2394 | -131.8617 |
| s_Citrobacter_youngae           | IschemicStroke      | Simple mode               | 16 | 1.0035 | 0.9734 | 1.0345 | 0.8253 | 0.0048  | 0.0084 | 0.5784 | 17.3219 | 0.2394 | -131.8617 |
| s_Citrobacter_youngae           | IschemicStroke      | Weighted mode             | 16 | 0.9949 | 0.9753 | 1.0148 | 0.6183 | 0.0048  | 0.0084 | 0.5784 | 17.3219 | 0.2394 | -131.8617 |
| s_Citrobacter_youngae           | LargeArteryStroke   | MR Egger                  | 15 | 0.8837 | 0.7937 | 0.9839 | 0.0419 | 0.0671  | 0.0309 | 0.0490 | 29.0436 | 0.0103 | -14.5789  |
| s_Citrobacter_youngae           | LargeArteryStroke   | Weighted median           | 15 | 0.9644 | 0.9055 | 1.0271 | 0.2589 | 0.0671  | 0.0309 | 0.0490 | 29.0436 | 0.0103 | -14.5789  |
| s_Citrobacter_youngae           | LargeArteryStroke   | Inverse variance weighted | 15 | 0.9812 | 0.9263 | 1.0392 | 0.5165 | 0.0671  | 0.0309 | 0.0490 | 29.0436 | 0.0103 | -14.5789  |
| s_Citrobacter_youngae           | LargeArteryStroke   | Simple mode               | 15 | 1.0274 | 0.9021 | 1.1701 | 0.6900 | 0.0671  | 0.0309 | 0.0490 | 29.0436 | 0.0103 | -14.5789  |
| s_Citrobacter_youngae           | LargeArteryStroke   | Weighted mode             | 15 | 0.9487 | 0.8854 | 1.0167 | 0.1580 | 0.0671  | 0.0309 | 0.0490 | 29.0436 | 0.0103 | -14.5789  |
| s_Citrobacter_youngae           | SmallVesselStroke   | MR Egger                  | 15 | 0.9877 | 0.9394 | 1.0384 | 0.6355 | 0.0034  | 0.0142 | 0.8136 | 13.9448 | 0.3777 | -70.0375  |
| s_Citrobacter_youngae           | SmallVesselStroke   | Weighted median           | 15 | 0.9914 | 0.9600 | 1.0238 | 0.5977 | 0.0034  | 0.0142 | 0.8136 | 13.9448 | 0.3777 | -70.0375  |
| s_Citrobacter_youngae           | SmallVesselStroke   | Inverse variance weighted | 15 | 0.9931 | 0.9709 | 1.0157 | 0.5454 | 0.0034  | 0.0142 | 0.8136 | 13.9448 | 0.3777 | -70.0375  |
| s_Citrobacter_youngae           | SmallVesselStroke   | Simple mode               | 15 | 1.0014 | 0.9502 | 1.0554 | 0.9592 | 0.0034  | 0.0142 | 0.8136 | 13.9448 | 0.3777 | -70.0375  |
| s_Citrobacter_youngae           | SmallVesselStroke   | Weighted mode             | 15 | 0.9931 | 0.9609 | 1.0264 | 0.6857 | 0.0034  | 0.0142 | 0.8136 | 13.9448 | 0.3777 | -70.0375  |
| s_Citrobacter_youngae           | Stroke              | MR Egger                  | 17 | 0.9921 | 0.9636 | 1.0215 | 0.6033 | 0.0034  | 0.0080 | 0.6799 | 19.9527 | 0.1738 | -54.1039  |
| s_Citrobacter_youngae           | Stroke              | Weighted median           | 17 | 0.9901 | 0.9739 | 1.0065 | 0.2350 | 0.0034  | 0.0080 | 0.6799 | 19.9527 | 0.1738 | -54.1039  |
| s_Citrobacter_youngae           | Stroke              | Inverse variance weighted | 17 | 0.9977 | 0.9856 | 1.0101 | 0.7191 | 0.0034  | 0.0080 | 0.6799 | 19.9527 | 0.1738 | -54.1039  |
| s_Citrobacter_youngae           | Stroke              | Simple mode               | 17 | 1.0026 | 0.9760 | 1.0299 | 0.8523 | 0.0034  | 0.0080 | 0.6799 | 19.9527 | 0.1738 | -54.1039  |
| s_Citrobacter_youngae           | Stroke              | Weighted mode             | 17 | 0.9915 | 0.9733 | 1.0101 | 0.3817 | 0.0034  | 0.0080 | 0.6799 | 19.9527 | 0.1738 | -54.1039  |
| s_Clostridiales_genomosp._BVAB3 | CardioEmbolicStroke | MR Egger                  | 11 | 1.0878 | 0.6880 | 1.7199 | 0.7270 | -0.0352 | 0.0985 | 0.7288 | 8.4796  | 0.4866 | -140.6954 |
| s_Clostridiales_genomosp._BVAB3 | CardioEmbolicStroke | Weighted median           | 11 | 1.0174 | 0.9104 | 1.1370 | 0.7609 | -0.0352 | 0.0985 | 0.7288 | 8.4796  | 0.4866 | -140.6954 |
| s_Clostridiales_genomosp._BVAB3 | CardioEmbolicStroke | Inverse variance weighted | 11 | 1.0019 | 0.9233 | 1.0872 | 0.9635 | -0.0352 | 0.0985 | 0.7288 | 8.4796  | 0.4866 | -140.6954 |
| s_Clostridiales_genomosp._BVAB3 | CardioEmbolicStroke | Simple mode               | 11 | 1.0420 | 0.8711 | 1.2465 | 0.6622 | -0.0352 | 0.0985 | 0.7288 | 8.4796  | 0.4866 | -140.6954 |
| s_Clostridiales_genomosp._BVAB3 | CardioEmbolicStroke | Weighted mode             | 11 | 1.0330 | 0.8643 | 1.2346 | 0.7289 | -0.0352 | 0.0985 | 0.7288 | 8.4796  | 0.4866 | -140.6954 |
| s_Clostridiales_genomosp._BVAB3 | IschemicStroke      | MR Egger                  | 11 | 1.0318 | 0.9095 | 1.1706 | 0.6384 | -0.0196 | 0.0271 | 0.4888 | 12.6416 | 0.1795 | -675.9597 |
| s_Clostridiales_genomosp._BVAB3 | IschemicStroke      | Weighted median           | 11 | 0.9784 | 0.9529 | 1.0045 | 0.1039 | -0.0196 | 0.0271 | 0.4888 | 12.6416 | 0.1795 | -675.9597 |
| s_Clostridiales_genomosp._BVAB3 | IschemicStroke      | Inverse variance weighted | 11 | 0.9857 | 0.9644 | 1.0074 | 0.1954 | -0.0196 | 0.0271 | 0.4888 | 12.6416 | 0.1795 | -675.9597 |
| s_Clostridiales_genomosp._BVAB3 | IschemicStroke      | Simple mode               | 11 | 0.9710 | 0.9288 | 1.0152 | 0.2243 | -0.0196 | 0.0271 | 0.4888 | 12.6416 | 0.1795 | -675.9597 |
| s_Clostridiales_genomosp._BVAB3 | IschemicStroke      | Weighted mode             | 11 | 0.9706 | 0.9290 | 1.0139 | 0.2101 | -0.0196 | 0.0271 | 0.4888 | 12.6416 | 0.1795 | -675.9597 |
| s_Clostridiales_genomosp._BVAB3 | LargeArteryStroke   | MR Egger                  | 11 | 1.1315 | 0.8037 | 1.5929 | 0.4970 | -0.0706 | 0.0735 | 0.3624 | 7.4271  | 0.5927 | -209.0316 |
| s_Clostridiales_genomosp._BVAB3 | LargeArteryStroke   | Weighted median           | 11 | 0.9415 | 0.8641 | 1.0258 | 0.1684 | -0.0706 | 0.0735 | 0.3624 | 7.4271  | 0.5927 | -209.0316 |

|                                 |                     |                           |    |        |        |        |        |         |        |        |         |        |           |
|---------------------------------|---------------------|---------------------------|----|--------|--------|--------|--------|---------|--------|--------|---------|--------|-----------|
| s_Clostridiales_genomosp._BVAB3 | LargeArteryStroke   | Inverse variance weighted | 11 | 0.9596 | 0.9028 | 1.0200 | 0.1854 | -0.0706 | 0.0735 | 0.3624 | 7.4271  | 0.5927 | -209.0316 |
| s_Clostridiales_genomosp._BVAB3 | LargeArteryStroke   | Simple mode               | 11 | 0.9326 | 0.8185 | 1.0627 | 0.3196 | -0.0706 | 0.0735 | 0.3624 | 7.4271  | 0.5927 | -209.0316 |
| s_Clostridiales_genomosp._BVAB3 | LargeArteryStroke   | Weighted mode             | 11 | 0.9338 | 0.8160 | 1.0685 | 0.3427 | -0.0706 | 0.0735 | 0.3624 | 7.4271  | 0.5927 | -209.0316 |
| s_Clostridiales_genomosp._BVAB3 | SmallVesselStroke   | MR Egger                  | 11 | 0.9697 | 0.7495 | 1.2546 | 0.8201 | 0.0136  | 0.0554 | 0.8115 | 16.5174 | 0.0568 | -285.0175 |
| s_Clostridiales_genomosp._BVAB3 | SmallVesselStroke   | Weighted median           | 11 | 0.9945 | 0.9464 | 1.0449 | 0.8257 | 0.0136  | 0.0554 | 0.8115 | 16.5174 | 0.0568 | -285.0175 |
| s_Clostridiales_genomosp._BVAB3 | SmallVesselStroke   | Inverse variance weighted | 11 | 1.0010 | 0.9581 | 1.0458 | 0.9648 | 0.0136  | 0.0554 | 0.8115 | 16.5174 | 0.0568 | -285.0175 |
| s_Clostridiales_genomosp._BVAB3 | SmallVesselStroke   | Simple mode               | 11 | 0.9771 | 0.8840 | 1.0800 | 0.6599 | 0.0136  | 0.0554 | 0.8115 | 16.5174 | 0.0568 | -285.0175 |
| s_Clostridiales_genomosp._BVAB3 | SmallVesselStroke   | Weighted mode             | 11 | 0.9615 | 0.8824 | 1.0478 | 0.3918 | 0.0136  | 0.0554 | 0.8115 | 16.5174 | 0.0568 | -285.0175 |
| s_Clostridiales_genomosp._BVAB3 | Stroke              | MR Egger                  | 11 | 1.0461 | 0.9509 | 1.1508 | 0.3791 | -0.0245 | 0.0204 | 0.2610 | 11.2670 | 0.3371 | -894.2934 |
| s_Clostridiales_genomosp._BVAB3 | Stroke              | Weighted median           | 11 | 0.9917 | 0.9684 | 1.0155 | 0.4886 | -0.0245 | 0.0204 | 0.2610 | 11.2670 | 0.3371 | -894.2934 |
| s_Clostridiales_genomosp._BVAB3 | Stroke              | Inverse variance weighted | 11 | 0.9876 | 0.9708 | 1.0048 | 0.1572 | -0.0245 | 0.0204 | 0.2610 | 11.2670 | 0.3371 | -894.2934 |
| s_Clostridiales_genomosp._BVAB3 | Stroke              | Simple mode               | 11 | 0.9945 | 0.9567 | 1.0338 | 0.7870 | -0.0245 | 0.0204 | 0.2610 | 11.2670 | 0.3371 | -894.2934 |
| s_Clostridiales_genomosp._BVAB3 | Stroke              | Weighted mode             | 11 | 0.9938 | 0.9547 | 1.0345 | 0.7665 | -0.0245 | 0.0204 | 0.2610 | 11.2670 | 0.3371 | -894.2934 |
| s_Clostridium_bartlettii        | CardioEmbolicStroke | MR Egger                  | 8  | 0.8144 | 0.4233 | 1.5666 | 0.5611 | 0.0536  | 0.0809 | 0.5320 | 4.0185  | 0.6742 | 302.4930  |
| s_Clostridium_bartlettii        | CardioEmbolicStroke | Weighted median           | 8  | 0.9713 | 0.7738 | 1.2193 | 0.8019 | 0.0536  | 0.0809 | 0.5320 | 4.0185  | 0.6742 | 302.4930  |
| s_Clostridium_bartlettii        | CardioEmbolicStroke | Inverse variance weighted | 8  | 1.0080 | 0.8472 | 1.1994 | 0.9282 | 0.0536  | 0.0809 | 0.5320 | 4.0185  | 0.6742 | 302.4930  |
| s_Clostridium_bartlettii        | CardioEmbolicStroke | Simple mode               | 8  | 1.0030 | 0.6932 | 1.4513 | 0.9876 | 0.0536  | 0.0809 | 0.5320 | 4.0185  | 0.6742 | 302.4930  |
| s_Clostridium_bartlettii        | CardioEmbolicStroke | Weighted mode             | 8  | 0.9109 | 0.6401 | 1.2963 | 0.6202 | 0.0536  | 0.0809 | 0.5320 | 4.0185  | 0.6742 | 302.4930  |
| s_Clostridium_bartlettii        | IschemicStroke      | MR Egger                  | 16 | 1.0310 | 0.9679 | 1.0981 | 0.3593 | -0.0065 | 0.0112 | 0.5716 | 23.4928 | 0.0527 | -40.3348  |
| s_Clostridium_bartlettii        | IschemicStroke      | Weighted median           | 16 | 1.0177 | 0.9819 | 1.0549 | 0.3360 | -0.0065 | 0.0112 | 0.5716 | 23.4928 | 0.0527 | -40.3348  |
| s_Clostridium_bartlettii        | IschemicStroke      | Inverse variance weighted | 16 | 1.0149 | 0.9818 | 1.0492 | 0.3823 | -0.0065 | 0.0112 | 0.5716 | 23.4928 | 0.0527 | -40.3348  |
| s_Clostridium_bartlettii        | IschemicStroke      | Simple mode               | 16 | 1.0167 | 0.9693 | 1.0664 | 0.5079 | -0.0065 | 0.0112 | 0.5716 | 23.4928 | 0.0527 | -40.3348  |
| s_Clostridium_bartlettii        | IschemicStroke      | Weighted mode             | 16 | 1.0210 | 0.9766 | 1.0674 | 0.3734 | -0.0065 | 0.0112 | 0.5716 | 23.4928 | 0.0527 | -40.3348  |
| s_Clostridium_bartlettii        | LargeArteryStroke   | MR Egger                  | 12 | 1.1447 | 0.9292 | 1.4103 | 0.2327 | -0.0393 | 0.0326 | 0.2559 | 9.5767  | 0.5688 | -68.7985  |
| s_Clostridium_bartlettii        | LargeArteryStroke   | Weighted median           | 12 | 1.0129 | 0.8793 | 1.1667 | 0.8594 | -0.0393 | 0.0326 | 0.2559 | 9.5767  | 0.5688 | -68.7985  |
| s_Clostridium_bartlettii        | LargeArteryStroke   | Inverse variance weighted | 12 | 1.0224 | 0.9265 | 1.1282 | 0.6597 | -0.0393 | 0.0326 | 0.2559 | 9.5767  | 0.5688 | -68.7985  |
| s_Clostridium_bartlettii        | LargeArteryStroke   | Simple mode               | 12 | 0.9255 | 0.7217 | 1.1870 | 0.5545 | -0.0393 | 0.0326 | 0.2559 | 9.5767  | 0.5688 | -68.7985  |
| s_Clostridium_bartlettii        | LargeArteryStroke   | Weighted mode             | 12 | 1.1562 | 0.9234 | 1.4478 | 0.2320 | -0.0393 | 0.0326 | 0.2559 | 9.5767  | 0.5688 | -68.7985  |
| s_Clostridium_bartlettii        | SmallVesselStroke   | MR Egger                  | 12 | 1.0267 | 0.8836 | 1.1931 | 0.7378 | -0.0162 | 0.0236 | 0.5082 | 17.1894 | 0.0703 | -136.5370 |
| s_Clostridium_bartlettii        | SmallVesselStroke   | Weighted median           | 12 | 1.0283 | 0.9502 | 1.1127 | 0.4889 | -0.0162 | 0.0236 | 0.5082 | 17.1894 | 0.0703 | -136.5370 |
| s_Clostridium_bartlettii        | SmallVesselStroke   | Inverse variance weighted | 12 | 0.9803 | 0.9144 | 1.0509 | 0.5752 | -0.0162 | 0.0236 | 0.5082 | 17.1894 | 0.0703 | -136.5370 |
| s_Clostridium_bartlettii        | SmallVesselStroke   | Simple mode               | 12 | 1.0260 | 0.9045 | 1.1638 | 0.6973 | -0.0162 | 0.0236 | 0.5082 | 17.1894 | 0.0703 | -136.5370 |
| s_Clostridium_bartlettii        | SmallVesselStroke   | Weighted mode             | 12 | 1.0301 | 0.9260 | 1.1458 | 0.5967 | -0.0162 | 0.0236 | 0.5082 | 17.1894 | 0.0703 | -136.5370 |
| s_Clostridium_bartlettii        | Stroke              | MR Egger                  | 14 | 0.9886 | 0.9178 | 1.0648 | 0.7675 | 0.0070  | 0.0115 | 0.5550 | 21.9772 | 0.0378 | -89.6812  |
| s_Clostridium_bartlettii        | Stroke              | Weighted median           | 14 | 1.0171 | 0.9819 | 1.0536 | 0.3458 | 0.0070  | 0.0115 | 0.5550 | 21.9772 | 0.0378 | -89.6812  |
| s_Clostridium_bartlettii        | Stroke              | Inverse variance weighted | 14 | 1.0089 | 0.9749 | 1.0440 | 0.6135 | 0.0070  | 0.0115 | 0.5550 | 21.9772 | 0.0378 | -89.6812  |
| s_Clostridium_bartlettii        | Stroke              | Simple mode               | 14 | 1.0245 | 0.9745 | 1.0771 | 0.3604 | 0.0070  | 0.0115 | 0.5550 | 21.9772 | 0.0378 | -89.6812  |
| s_Clostridium_bartlettii        | Stroke              | Weighted mode             | 14 | 1.0227 | 0.9774 | 1.0702 | 0.3492 | 0.0070  | 0.0115 | 0.5550 | 21.9772 | 0.0378 | -89.6812  |
| s_Clostridium_bolteae           | CardioEmbolicStroke | MR Egger                  | 11 | 0.9414 | 0.5520 | 1.6055 | 0.8294 | 0.0107  | 0.0887 | 0.9065 | 14.0053 | 0.1221 | -157.5025 |
| s_Clostridium_bolteae           | CardioEmbolicStroke | Weighted median           | 11 | 0.9260 | 0.7728 | 1.1095 | 0.4046 | 0.0107  | 0.0887 | 0.9065 | 14.0053 | 0.1221 | -157.5025 |
| s_Clostridium_bolteae           | CardioEmbolicStroke | Inverse variance weighted | 11 | 0.9714 | 0.8343 | 1.1310 | 0.7084 | 0.0107  | 0.0887 | 0.9065 | 14.0053 | 0.1221 | -157.5025 |
| s_Clostridium_bolteae           | CardioEmbolicStroke | Simple mode               | 11 | 0.9193 | 0.6985 | 1.2100 | 0.5617 | 0.0107  | 0.0887 | 0.9065 | 14.0053 | 0.1221 | -157.5025 |
| s_Clostridium_bolteae           | CardioEmbolicStroke | Weighted mode             | 11 | 0.9101 | 0.6949 | 1.1919 | 0.5092 | 0.0107  | 0.0887 | 0.9065 | 14.0053 | 0.1221 | -157.5025 |
| s_Clostridium_bolteae           | IschemicStroke      | MR Egger                  | 15 | 1.0381 | 0.9790 | 1.1008 | 0.2330 | -0.0098 | 0.0117 | 0.4178 | 18.2207 | 0.1493 | -26.2062  |
| s_Clostridium_bolteae           | IschemicStroke      | Weighted median           | 15 | 1.0247 | 0.9880 | 1.0628 | 0.1896 | -0.0098 | 0.0117 | 0.4178 | 18.2207 | 0.1493 | -26.2062  |
| s_Clostridium_bolteae           | IschemicStroke      | Inverse variance weighted | 15 | 1.0157 | 0.9872 | 1.0450 | 0.2824 | -0.0098 | 0.0117 | 0.4178 | 18.2207 | 0.1493 | -26.2062  |
| s_Clostridium_bolteae           | IschemicStroke      | Simple mode               | 15 | 1.0448 | 0.9715 | 1.1236 | 0.2576 | -0.0098 | 0.0117 | 0.4178 | 18.2207 | 0.1493 | -26.2062  |
| s_Clostridium_bolteae           | IschemicStroke      | Weighted mode             | 15 | 1.0480 | 0.9753 | 1.1262 | 0.2220 | -0.0098 | 0.0117 | 0.4178 | 18.2207 | 0.1493 | -26.2062  |
| s_Clostridium_bolteae           | LargeArteryStroke   | MR Egger                  | 11 | 0.9375 | 0.6817 | 1.2893 | 0.7008 | -0.0061 | 0.0530 | 0.9112 | 4.6223  | 0.8659 | -305.4952 |
| s_Clostridium_bolteae           | LargeArteryStroke   | Weighted median           | 11 | 0.9130 | 0.8086 | 1.0309 | 0.1418 | -0.0061 | 0.0530 | 0.9112 | 4.6223  | 0.8659 | -305.4952 |
| s_Clostridium_bolteae           | LargeArteryStroke   | Inverse variance weighted | 11 | 0.9210 | 0.8369 | 1.0135 | 0.0920 | -0.0061 | 0.0530 | 0.9112 | 4.6223  | 0.8659 | -305.4952 |
| s_Clostridium_bolteae           | LargeArteryStroke   | Simple mode               | 11 | 0.9105 | 0.7565 | 1.0959 | 0.3450 | -0.0061 | 0.0530 | 0.9112 | 4.6223  | 0.8659 | -305.4952 |
| s_Clostridium_bolteae           | LargeArteryStroke   | Weighted mode             | 11 | 0.9105 | 0.7690 | 1.0781 | 0.3022 | -0.0061 | 0.0530 | 0.9112 | 4.6223  | 0.8659 | -305.4952 |

|                         |                     |                           |    |        |        |        |        |         |        |        |         |        |            |
|-------------------------|---------------------|---------------------------|----|--------|--------|--------|--------|---------|--------|--------|---------|--------|------------|
| s_Clostridium_bolteae   | SmallVesselStroke   | MR Egger                  | 12 | 1.0520 | 0.9319 | 1.1876 | 0.4314 | -0.0069 | 0.0218 | 0.7576 | 7.9131  | 0.6373 | -95.0635   |
| s_Clostridium_bolteae   | SmallVesselStroke   | Weighted median           | 12 | 1.0234 | 0.9567 | 1.0947 | 0.5006 | -0.0069 | 0.0218 | 0.7576 | 7.9131  | 0.6373 | -95.0635   |
| s_Clostridium_bolteae   | SmallVesselStroke   | Inverse variance weighted | 12 | 1.0333 | 0.9838 | 1.0853 | 0.1904 | -0.0069 | 0.0218 | 0.7576 | 7.9131  | 0.6373 | -95.0635   |
| s_Clostridium_bolteae   | SmallVesselStroke   | Simple mode               | 12 | 1.0276 | 0.9208 | 1.1468 | 0.6362 | -0.0069 | 0.0218 | 0.7576 | 7.9131  | 0.6373 | -95.0635   |
| s_Clostridium_bolteae   | SmallVesselStroke   | Weighted mode             | 12 | 1.0204 | 0.9273 | 1.1228 | 0.6874 | -0.0069 | 0.0218 | 0.7576 | 7.9131  | 0.6373 | -95.0635   |
| s_Clostridium_bolteae   | Stroke              | MR Egger                  | 16 | 1.0131 | 0.9696 | 1.0584 | 0.5709 | -0.0024 | 0.0089 | 0.7900 | 17.4185 | 0.2346 | -35.7205   |
| s_Clostridium_bolteae   | Stroke              | Weighted median           | 16 | 1.0090 | 0.9789 | 1.0401 | 0.5611 | -0.0024 | 0.0089 | 0.7900 | 17.4185 | 0.2346 | -35.7205   |
| s_Clostridium_bolteae   | Stroke              | Inverse variance weighted | 16 | 1.0078 | 0.9864 | 1.0296 | 0.4798 | -0.0024 | 0.0089 | 0.7900 | 17.4185 | 0.2346 | -35.7205   |
| s_Clostridium_bolteae   | Stroke              | Simple mode               | 16 | 1.0294 | 0.9730 | 1.0891 | 0.3292 | -0.0024 | 0.0089 | 0.7900 | 17.4185 | 0.2346 | -35.7205   |
| s_Clostridium_bolteae   | Stroke              | Weighted mode             | 16 | 1.0037 | 0.9538 | 1.0562 | 0.8892 | -0.0024 | 0.0089 | 0.7900 | 17.4185 | 0.2346 | -35.7205   |
| s_Clostridium_difficile | CardioEmbolicStroke | MR Egger                  | 7  | 1.0468 | 0.4141 | 2.6459 | 0.9268 | -0.0196 | 0.0642 | 0.7724 | 4.9731  | 0.4192 | 25.8954    |
| s_Clostridium_difficile | CardioEmbolicStroke | Weighted median           | 7  | 0.8951 | 0.5430 | 1.4756 | 0.6640 | -0.0196 | 0.0642 | 0.7724 | 4.9731  | 0.4192 | 25.8954    |
| s_Clostridium_difficile | CardioEmbolicStroke | Inverse variance weighted | 7  | 0.9165 | 0.6376 | 1.3174 | 0.6375 | -0.0196 | 0.0642 | 0.7724 | 4.9731  | 0.4192 | 25.8954    |
| s_Clostridium_difficile | CardioEmbolicStroke | Simple mode               | 7  | 1.1508 | 0.5818 | 2.2762 | 0.7004 | -0.0196 | 0.0642 | 0.7724 | 4.9731  | 0.4192 | 25.8954    |
| s_Clostridium_difficile | CardioEmbolicStroke | Weighted mode             | 7  | 0.9893 | 0.5100 | 1.9190 | 0.9756 | -0.0196 | 0.0642 | 0.7724 | 4.9731  | 0.4192 | 25.8954    |
| s_Clostridium_difficile | IschemicStroke      | MR Egger                  | 14 | 0.8953 | 0.8123 | 0.9869 | 0.0459 | 0.0165  | 0.0095 | 0.1075 | 10.7353 | 0.6330 | -464.9833  |
| s_Clostridium_difficile | IschemicStroke      | Weighted median           | 14 | 0.9290 | 0.8592 | 1.0044 | 0.0644 | 0.0165  | 0.0095 | 0.1075 | 10.7353 | 0.6330 | -464.9833  |
| s_Clostridium_difficile | IschemicStroke      | Inverse variance weighted | 14 | 0.9607 | 0.9080 | 1.0164 | 0.1629 | 0.0165  | 0.0095 | 0.1075 | 10.7353 | 0.6330 | -464.9833  |
| s_Clostridium_difficile | IschemicStroke      | Simple mode               | 14 | 0.9145 | 0.7995 | 1.0460 | 0.2148 | 0.0165  | 0.0095 | 0.1075 | 10.7353 | 0.6330 | -464.9833  |
| s_Clostridium_difficile | IschemicStroke      | Weighted mode             | 14 | 0.9109 | 0.8100 | 1.0243 | 0.1430 | 0.0165  | 0.0095 | 0.1075 | 10.7353 | 0.6330 | -464.9833  |
| s_Clostridium_difficile | LargeArteryStroke   | MR Egger                  | 9  | 0.9592 | 0.5576 | 1.6499 | 0.8846 | 0.0034  | 0.0451 | 0.9418 | 12.0493 | 0.0989 | 140.3752   |
| s_Clostridium_difficile | LargeArteryStroke   | Weighted median           | 9  | 0.8431 | 0.6142 | 1.1572 | 0.2908 | 0.0034  | 0.0451 | 0.9418 | 12.0493 | 0.0989 | 140.3752   |
| s_Clostridium_difficile | LargeArteryStroke   | Inverse variance weighted | 9  | 0.9763 | 0.7446 | 1.2801 | 0.8624 | 0.0034  | 0.0451 | 0.9418 | 12.0493 | 0.0989 | 140.3752   |
| s_Clostridium_difficile | LargeArteryStroke   | Simple mode               | 9  | 0.8091 | 0.4837 | 1.3534 | 0.4430 | 0.0034  | 0.0451 | 0.9418 | 12.0493 | 0.0989 | 140.3752   |
| s_Clostridium_difficile | LargeArteryStroke   | Weighted mode             | 9  | 0.7733 | 0.5035 | 1.1876 | 0.2739 | 0.0034  | 0.0451 | 0.9418 | 12.0493 | 0.0989 | 140.3752   |
| s_Clostridium_difficile | SmallVesselStroke   | MR Egger                  | 11 | 0.8138 | 0.6526 | 1.0148 | 0.1006 | 0.0247  | 0.0201 | 0.2510 | 13.4649 | 0.1988 | -3303.7232 |
| s_Clostridium_difficile | SmallVesselStroke   | Weighted median           | 11 | 0.9735 | 0.8371 | 1.1321 | 0.7270 | 0.0247  | 0.0201 | 0.2510 | 13.4649 | 0.1988 | -3303.7232 |
| s_Clostridium_difficile | SmallVesselStroke   | Inverse variance weighted | 11 | 0.9122 | 0.8028 | 1.0364 | 0.1581 | 0.0247  | 0.0201 | 0.2510 | 13.4649 | 0.1988 | -3303.7232 |
| s_Clostridium_difficile | SmallVesselStroke   | Simple mode               | 11 | 1.0132 | 0.7804 | 1.3155 | 0.9235 | 0.0247  | 0.0201 | 0.2510 | 13.4649 | 0.1988 | -3303.7232 |
| s_Clostridium_difficile | SmallVesselStroke   | Weighted mode             | 11 | 0.9767 | 0.7854 | 1.2145 | 0.8363 | 0.0247  | 0.0201 | 0.2510 | 13.4649 | 0.1988 | -3303.7232 |
| s_Clostridium_difficile | Stroke              | MR Egger                  | 13 | 0.9623 | 0.8709 | 1.0634 | 0.4670 | 0.0048  | 0.0088 | 0.5956 | 10.3112 | 0.5026 | -2694.4299 |
| s_Clostridium_difficile | Stroke              | Weighted median           | 13 | 0.9829 | 0.9161 | 1.0545 | 0.6304 | 0.0048  | 0.0088 | 0.5956 | 10.3112 | 0.5026 | -2694.4299 |
| s_Clostridium_difficile | Stroke              | Inverse variance weighted | 13 | 0.9853 | 0.9342 | 1.0391 | 0.5852 | 0.0048  | 0.0088 | 0.5956 | 10.3112 | 0.5026 | -2694.4299 |
| s_Clostridium_difficile | Stroke              | Simple mode               | 13 | 0.9968 | 0.8822 | 1.1263 | 0.9598 | 0.0048  | 0.0088 | 0.5956 | 10.3112 | 0.5026 | -2694.4299 |
| s_Clostridium_difficile | Stroke              | Weighted mode             | 13 | 1.0003 | 0.8897 | 1.1247 | 0.9960 | 0.0048  | 0.0088 | 0.5956 | 10.3112 | 0.5026 | -2694.4299 |
| s_Clostridium_leptum    | CardioEmbolicStroke | MR Egger                  | 5  | 1.2658 | 0.5753 | 2.7850 | 0.5991 | -0.1073 | 0.1318 | 0.4752 | 4.2552  | 0.2352 | 485.6333   |
| s_Clostridium_leptum    | CardioEmbolicStroke | Weighted median           | 5  | 0.8307 | 0.6523 | 1.0578 | 0.1325 | -0.1073 | 0.1318 | 0.4752 | 4.2552  | 0.2352 | 485.6333   |
| s_Clostridium_leptum    | CardioEmbolicStroke | Inverse variance weighted | 5  | 0.9238 | 0.7514 | 1.1357 | 0.4520 | -0.1073 | 0.1318 | 0.4752 | 4.2552  | 0.2352 | 485.6333   |
| s_Clostridium_leptum    | CardioEmbolicStroke | Simple mode               | 5  | 0.8158 | 0.5795 | 1.1486 | 0.3083 | -0.1073 | 0.1318 | 0.4752 | 4.2552  | 0.2352 | 485.6333   |
| s_Clostridium_leptum    | CardioEmbolicStroke | Weighted mode             | 5  | 0.8178 | 0.5986 | 1.1174 | 0.2753 | -0.1073 | 0.1318 | 0.4752 | 4.2552  | 0.2352 | 485.6333   |
| s_Clostridium_leptum    | IschemicStroke      | MR Egger                  | 11 | 1.0070 | 0.9608 | 1.0555 | 0.7765 | -0.0052 | 0.0118 | 0.6668 | 3.4315  | 0.9447 | -159.0643  |
| s_Clostridium_leptum    | IschemicStroke      | Weighted median           | 11 | 0.9927 | 0.9563 | 1.0306 | 0.7019 | -0.0052 | 0.0118 | 0.6668 | 3.4315  | 0.9447 | -159.0643  |
| s_Clostridium_leptum    | IschemicStroke      | Inverse variance weighted | 11 | 0.9981 | 0.9727 | 1.0241 | 0.8845 | -0.0052 | 0.0118 | 0.6668 | 3.4315  | 0.9447 | -159.0643  |
| s_Clostridium_leptum    | IschemicStroke      | Simple mode               | 11 | 0.9900 | 0.9408 | 1.0418 | 0.7075 | -0.0052 | 0.0118 | 0.6668 | 3.4315  | 0.9447 | -159.0643  |
| s_Clostridium_leptum    | IschemicStroke      | Weighted mode             | 11 | 0.9912 | 0.9546 | 1.0291 | 0.6530 | -0.0052 | 0.0118 | 0.6668 | 3.4315  | 0.9447 | -159.0643  |
| s_Clostridium_leptum    | LargeArteryStroke   | MR Egger                  | 7  | 1.1206 | 0.9559 | 1.3137 | 0.2194 | -0.0573 | 0.0380 | 0.1924 | 5.5691  | 0.4732 | -86.7908   |
| s_Clostridium_leptum    | LargeArteryStroke   | Weighted median           | 7  | 1.0337 | 0.9091 | 1.1753 | 0.6130 | -0.0573 | 0.0380 | 0.1924 | 5.5691  | 0.4732 | -86.7908   |
| s_Clostridium_leptum    | LargeArteryStroke   | Inverse variance weighted | 7  | 1.0135 | 0.9258 | 1.1095 | 0.7714 | -0.0573 | 0.0380 | 0.1924 | 5.5691  | 0.4732 | -86.7908   |
| s_Clostridium_leptum    | LargeArteryStroke   | Simple mode               | 7  | 1.1140 | 0.9166 | 1.3540 | 0.3197 | -0.0573 | 0.0380 | 0.1924 | 5.5691  | 0.4732 | -86.7908   |
| s_Clostridium_leptum    | LargeArteryStroke   | Weighted mode             | 7  | 1.0547 | 0.9246 | 1.2032 | 0.4578 | -0.0573 | 0.0380 | 0.1924 | 5.5691  | 0.4732 | -86.7908   |
| s_Clostridium_leptum    | SmallVesselStroke   | MR Egger                  | 10 | 0.9821 | 0.8984 | 1.0736 | 0.7018 | 0.0080  | 0.0221 | 0.7280 | 8.8101  | 0.3586 | -46.6982   |
| s_Clostridium_leptum    | SmallVesselStroke   | Weighted median           | 10 | 1.0066 | 0.9434 | 1.0740 | 0.8427 | 0.0080  | 0.0221 | 0.7280 | 8.8101  | 0.3586 | -46.6982   |
| s_Clostridium_leptum    | SmallVesselStroke   | Inverse variance weighted | 10 | 0.9956 | 0.9498 | 1.0436 | 0.8543 | 0.0080  | 0.0221 | 0.7280 | 8.8101  | 0.3586 | -46.6982   |

|                              |                     |                           |    |        |        |        |        |         |        |        |         |        |           |
|------------------------------|---------------------|---------------------------|----|--------|--------|--------|--------|---------|--------|--------|---------|--------|-----------|
| s_Clostridium_leptum         | SmallVesselStroke   | Simple mode               | 10 | 1.0391 | 0.9391 | 1.1497 | 0.4764 | 0.0080  | 0.0221 | 0.7280 | 8.8101  | 0.3586 | -46.6982  |
| s_Clostridium_leptum         | SmallVesselStroke   | Weighted mode             | 10 | 1.0067 | 0.9382 | 1.0802 | 0.8578 | 0.0080  | 0.0221 | 0.7280 | 8.8101  | 0.3586 | -46.6982  |
| s_Clostridium_leptum         | Stroke              | MR Egger                  | 10 | 1.0204 | 0.9512 | 1.0946 | 0.5889 | -0.0052 | 0.0143 | 0.7256 | 2.0868  | 0.9782 | -471.0478 |
| s_Clostridium_leptum         | Stroke              | Weighted median           | 10 | 1.0161 | 0.9820 | 1.0513 | 0.3604 | -0.0052 | 0.0143 | 0.7256 | 2.0868  | 0.9782 | -471.0478 |
| s_Clostridium_leptum         | Stroke              | Inverse variance weighted | 10 | 1.0082 | 0.9810 | 1.0361 | 0.5580 | -0.0052 | 0.0143 | 0.7256 | 2.0868  | 0.9782 | -471.0478 |
| s_Clostridium_leptum         | Stroke              | Simple mode               | 10 | 1.0190 | 0.9696 | 1.0708 | 0.4771 | -0.0052 | 0.0143 | 0.7256 | 2.0868  | 0.9782 | -471.0478 |
| s_Clostridium_leptum         | Stroke              | Weighted mode             | 10 | 1.0202 | 0.9662 | 1.0771 | 0.4897 | -0.0052 | 0.0143 | 0.7256 | 2.0868  | 0.9782 | -471.0478 |
| s_Clostridium_methylpentosum | CardioEmbolicStroke | MR Egger                  | 10 | 0.9946 | 0.4211 | 2.3492 | 0.9905 | 0.0023  | 0.1192 | 0.9848 | 15.0355 | 0.0585 | 2916.3947 |
| s_Clostridium_methylpentosum | CardioEmbolicStroke | Weighted median           | 10 | 0.9135 | 0.7452 | 1.1199 | 0.3842 | 0.0023  | 0.1192 | 0.9848 | 15.0355 | 0.0585 | 2916.3947 |
| s_Clostridium_methylpentosum | CardioEmbolicStroke | Inverse variance weighted | 10 | 1.0030 | 0.8337 | 1.2067 | 0.9745 | 0.0023  | 0.1192 | 0.9848 | 15.0355 | 0.0585 | 2916.3947 |
| s_Clostridium_methylpentosum | CardioEmbolicStroke | Simple mode               | 10 | 0.8741 | 0.6230 | 1.2263 | 0.4558 | 0.0023  | 0.1192 | 0.9848 | 15.0355 | 0.0585 | 2916.3947 |
| s_Clostridium_methylpentosum | CardioEmbolicStroke | Weighted mode             | 10 | 0.8772 | 0.6314 | 1.2187 | 0.4547 | 0.0023  | 0.1192 | 0.9848 | 15.0355 | 0.0585 | 2916.3947 |
| s_Clostridium_methylpentosum | IschemicStroke      | MR Egger                  | 15 | 0.9666 | 0.9163 | 1.0197 | 0.2354 | 0.0099  | 0.0093 | 0.3082 | 9.2161  | 0.8170 | -147.9695 |
| s_Clostridium_methylpentosum | IschemicStroke      | Weighted median           | 15 | 0.9783 | 0.9440 | 1.0139 | 0.2291 | 0.0099  | 0.0093 | 0.3082 | 9.2161  | 0.8170 | -147.9695 |
| s_Clostridium_methylpentosum | IschemicStroke      | Inverse variance weighted | 15 | 0.9915 | 0.9665 | 1.0172 | 0.5130 | 0.0099  | 0.0093 | 0.3082 | 9.2161  | 0.8170 | -147.9695 |
| s_Clostridium_methylpentosum | IschemicStroke      | Simple mode               | 15 | 0.9832 | 0.9332 | 1.0359 | 0.5347 | 0.0099  | 0.0093 | 0.3082 | 9.2161  | 0.8170 | -147.9695 |
| s_Clostridium_methylpentosum | IschemicStroke      | Weighted mode             | 15 | 0.9746 | 0.9308 | 1.0205 | 0.2920 | 0.0099  | 0.0093 | 0.3082 | 9.2161  | 0.8170 | -147.9695 |
| s_Clostridium_methylpentosum | LargeArteryStroke   | MR Egger                  | 13 | 1.0081 | 0.8308 | 1.2232 | 0.9366 | -0.0207 | 0.0322 | 0.5325 | 7.5700  | 0.7512 | -47.0261  |
| s_Clostridium_methylpentosum | LargeArteryStroke   | Weighted median           | 13 | 0.9846 | 0.8753 | 1.1076 | 0.7961 | -0.0207 | 0.0322 | 0.5325 | 7.5700  | 0.7512 | -47.0261  |
| s_Clostridium_methylpentosum | LargeArteryStroke   | Inverse variance weighted | 13 | 0.9524 | 0.8728 | 1.0393 | 0.2741 | -0.0207 | 0.0322 | 0.5325 | 7.5700  | 0.7512 | -47.0261  |
| s_Clostridium_methylpentosum | LargeArteryStroke   | Simple mode               | 13 | 0.9625 | 0.8046 | 1.1515 | 0.6836 | -0.0207 | 0.0322 | 0.5325 | 7.5700  | 0.7512 | -47.0261  |
| s_Clostridium_methylpentosum | LargeArteryStroke   | Weighted mode             | 13 | 0.9900 | 0.8596 | 1.1402 | 0.8916 | -0.0207 | 0.0322 | 0.5325 | 7.5700  | 0.7512 | -47.0261  |
| s_Clostridium_methylpentosum | SmallVesselStroke   | MR Egger                  | 13 | 0.9336 | 0.8415 | 1.0356 | 0.2206 | 0.0236  | 0.0175 | 0.2042 | 9.4623  | 0.6630 | -119.4204 |
| s_Clostridium_methylpentosum | SmallVesselStroke   | Weighted median           | 13 | 0.9692 | 0.9068 | 1.0359 | 0.3564 | 0.0236  | 0.0175 | 0.2042 | 9.4623  | 0.6630 | -119.4204 |
| s_Clostridium_methylpentosum | SmallVesselStroke   | Inverse variance weighted | 13 | 0.9946 | 0.9481 | 1.0435 | 0.8257 | 0.0236  | 0.0175 | 0.2042 | 9.4623  | 0.6630 | -119.4204 |
| s_Clostridium_methylpentosum | SmallVesselStroke   | Simple mode               | 13 | 0.9950 | 0.8994 | 1.1008 | 0.9244 | 0.0236  | 0.0175 | 0.2042 | 9.4623  | 0.6630 | -119.4204 |
| s_Clostridium_methylpentosum | SmallVesselStroke   | Weighted mode             | 13 | 0.9751 | 0.8957 | 1.0614 | 0.5706 | 0.0236  | 0.0175 | 0.2042 | 9.4623  | 0.6630 | -119.4204 |
| s_Clostridium_methylpentosum | Stroke              | MR Egger                  | 15 | 0.9616 | 0.9151 | 1.0104 | 0.1453 | 0.0099  | 0.0084 | 0.2558 | 10.7387 | 0.7064 | -132.3617 |
| s_Clostridium_methylpentosum | Stroke              | Weighted median           | 15 | 0.9760 | 0.9469 | 1.0060 | 0.1161 | 0.0099  | 0.0084 | 0.2558 | 10.7387 | 0.7064 | -132.3617 |
| s_Clostridium_methylpentosum | Stroke              | Inverse variance weighted | 15 | 0.9877 | 0.9657 | 1.0101 | 0.2803 | 0.0099  | 0.0084 | 0.2558 | 10.7387 | 0.7064 | -132.3617 |
| s_Clostridium_methylpentosum | Stroke              | Simple mode               | 15 | 0.9733 | 0.9300 | 1.0186 | 0.2632 | 0.0099  | 0.0084 | 0.2558 | 10.7387 | 0.7064 | -132.3617 |
| s_Clostridium_methylpentosum | Stroke              | Weighted mode             | 15 | 0.9713 | 0.9287 | 1.0159 | 0.2243 | 0.0099  | 0.0084 | 0.2558 | 10.7387 | 0.7064 | -132.3617 |
| s_Clostridium_perfringens    | CardioEmbolicStroke | MR Egger                  | 10 | 1.2613 | 0.6878 | 2.3129 | 0.4745 | -0.0938 | 0.1144 | 0.4358 | 15.2853 | 0.0538 | -211.8484 |
| s_Clostridium_perfringens    | CardioEmbolicStroke | Weighted median           | 10 | 1.0115 | 0.8866 | 1.1540 | 0.8651 | -0.0938 | 0.1144 | 0.4358 | 15.2853 | 0.0538 | -211.8484 |
| s_Clostridium_perfringens    | CardioEmbolicStroke | Inverse variance weighted | 10 | 0.9842 | 0.8682 | 1.1157 | 0.8035 | -0.0938 | 0.1144 | 0.4358 | 15.2853 | 0.0538 | -211.8484 |
| s_Clostridium_perfringens    | CardioEmbolicStroke | Simple mode               | 10 | 1.0264 | 0.8489 | 1.2411 | 0.7939 | -0.0938 | 0.1144 | 0.4358 | 15.2853 | 0.0538 | -211.8484 |
| s_Clostridium_perfringens    | CardioEmbolicStroke | Weighted mode             | 10 | 1.0240 | 0.8635 | 1.2143 | 0.7911 | -0.0938 | 0.1144 | 0.4358 | 15.2853 | 0.0538 | -211.8484 |
| s_Clostridium_perfringens    | IschemicStroke      | MR Egger                  | 16 | 1.0262 | 0.9884 | 1.0655 | 0.1979 | -0.0165 | 0.0086 | 0.0747 | 16.5151 | 0.3487 | -60.2398  |
| s_Clostridium_perfringens    | IschemicStroke      | Weighted median           | 16 | 1.0136 | 0.9880 | 1.0398 | 0.3016 | -0.0165 | 0.0086 | 0.0747 | 16.5151 | 0.3487 | -60.2398  |
| s_Clostridium_perfringens    | IschemicStroke      | Inverse variance weighted | 16 | 0.9931 | 0.9754 | 1.0112 | 0.4535 | -0.0165 | 0.0086 | 0.0747 | 16.5151 | 0.3487 | -60.2398  |
| s_Clostridium_perfringens    | IschemicStroke      | Simple mode               | 16 | 1.0145 | 0.9689 | 1.0622 | 0.5494 | -0.0165 | 0.0086 | 0.0747 | 16.5151 | 0.3487 | -60.2398  |
| s_Clostridium_perfringens    | IschemicStroke      | Weighted mode             | 16 | 1.0193 | 0.9846 | 1.0552 | 0.2970 | -0.0165 | 0.0086 | 0.0747 | 16.5151 | 0.3487 | -60.2398  |
| s_Clostridium_perfringens    | LargeArteryStroke   | MR Egger                  | 12 | 1.1225 | 0.8377 | 1.5041 | 0.4568 | -0.0279 | 0.0575 | 0.6378 | 14.4467 | 0.1536 | -32.8556  |
| s_Clostridium_perfringens    | LargeArteryStroke   | Weighted median           | 12 | 1.0903 | 0.9967 | 1.1928 | 0.0592 | -0.0279 | 0.0575 | 0.6378 | 14.4467 | 0.1536 | -32.8556  |
| s_Clostridium_perfringens    | LargeArteryStroke   | Inverse variance weighted | 12 | 1.0469 | 0.9699 | 1.1300 | 0.2401 | -0.0279 | 0.0575 | 0.6378 | 14.4467 | 0.1536 | -32.8556  |
| s_Clostridium_perfringens    | LargeArteryStroke   | Simple mode               | 12 | 1.1320 | 0.9608 | 1.3336 | 0.1665 | -0.0279 | 0.0575 | 0.6378 | 14.4467 | 0.1536 | -32.8556  |
| s_Clostridium_perfringens    | LargeArteryStroke   | Weighted mode             | 12 | 1.1158 | 0.9567 | 1.3013 | 0.1903 | -0.0279 | 0.0575 | 0.6378 | 14.4467 | 0.1536 | -32.8556  |
| s_Clostridium_perfringens    | SmallVesselStroke   | MR Egger                  | 14 | 1.0716 | 0.9362 | 1.2265 | 0.3355 | -0.0273 | 0.0272 | 0.3362 | 17.5028 | 0.1773 | -55.7658  |
| s_Clostridium_perfringens    | SmallVesselStroke   | Weighted median           | 14 | 0.9974 | 0.9468 | 1.0506 | 0.9207 | -0.0273 | 0.0272 | 0.3362 | 17.5028 | 0.1773 | -55.7658  |
| s_Clostridium_perfringens    | SmallVesselStroke   | Inverse variance weighted | 14 | 1.0034 | 0.9630 | 1.0454 | 0.8723 | -0.0273 | 0.0272 | 0.3362 | 17.5028 | 0.1773 | -55.7658  |
| s_Clostridium_perfringens    | SmallVesselStroke   | Simple mode               | 14 | 0.9973 | 0.9118 | 1.0909 | 0.9545 | -0.0273 | 0.0272 | 0.3362 | 17.5028 | 0.1773 | -55.7658  |
| s_Clostridium_perfringens    | SmallVesselStroke   | Weighted mode             | 14 | 0.9984 | 0.9240 | 1.0788 | 0.9683 | -0.0273 | 0.0272 | 0.3362 | 17.5028 | 0.1773 | -55.7658  |
| s_Clostridium_perfringens    | Stroke              | MR Egger                  | 14 | 1.0205 | 0.9623 | 1.0822 | 0.5105 | -0.0112 | 0.0117 | 0.3608 | 9.8069  | 0.7096 | -234.9618 |

|                               |                     |                           |    |        |        |        |        |         |        |        |         |        |             |
|-------------------------------|---------------------|---------------------------|----|--------|--------|--------|--------|---------|--------|--------|---------|--------|-------------|
| s_Clostridium_perfringens     | Stroke              | Weighted median           | 14 | 0.9952 | 0.9724 | 1.0186 | 0.6879 | -0.0112 | 0.0117 | 0.3608 | 9.8069  | 0.7096 | -234.9618   |
| s_Clostridium_perfringens     | Stroke              | Inverse variance weighted | 14 | 0.9931 | 0.9765 | 1.0100 | 0.4201 | -0.0112 | 0.0117 | 0.3608 | 9.8069  | 0.7096 | -234.9618   |
| s_Clostridium_perfringens     | Stroke              | Simple mode               | 14 | 0.9696 | 0.9314 | 1.0093 | 0.1550 | -0.0112 | 0.0117 | 0.3608 | 9.8069  | 0.7096 | -234.9618   |
| s_Clostridium_perfringens     | Stroke              | Weighted mode             | 14 | 1.0050 | 0.9670 | 1.0444 | 0.8044 | -0.0112 | 0.0117 | 0.3608 | 9.8069  | 0.7096 | -234.9618   |
| s_Clostridium_amosum          | CardioEmbolicStroke | MR Egger                  | 10 | 1.1436 | 0.7513 | 1.7408 | 0.5487 | -0.0392 | 0.0824 | 0.6467 | 12.8055 | 0.1187 | -117.2311   |
| s_Clostridium_amosum          | CardioEmbolicStroke | Weighted median           | 10 | 1.0475 | 0.8990 | 1.2205 | 0.5521 | -0.0392 | 0.0824 | 0.6467 | 12.8055 | 0.1187 | -117.2311   |
| s_Clostridium_amosum          | CardioEmbolicStroke | Inverse variance weighted | 10 | 1.0382 | 0.9134 | 1.1801 | 0.5663 | -0.0392 | 0.0824 | 0.6467 | 12.8055 | 0.1187 | -117.2311   |
| s_Clostridium_amosum          | CardioEmbolicStroke | Simple mode               | 10 | 1.0169 | 0.7919 | 1.3060 | 0.8982 | -0.0392 | 0.0824 | 0.6467 | 12.8055 | 0.1187 | -117.2311   |
| s_Clostridium_amosum          | CardioEmbolicStroke | Weighted mode             | 10 | 1.0782 | 0.8875 | 1.3098 | 0.4678 | -0.0392 | 0.0824 | 0.6467 | 12.8055 | 0.1187 | -117.2311   |
| s_Clostridium_amosum          | IschemicStroke      | MR Egger                  | 17 | 0.9935 | 0.9593 | 1.0289 | 0.7197 | 0.0143  | 0.0093 | 0.1464 | 21.6755 | 0.1540 | -47.0881    |
| s_Clostridium_amosum          | IschemicStroke      | Weighted median           | 17 | 1.0084 | 0.9832 | 1.0342 | 0.5174 | 0.0143  | 0.0093 | 0.1464 | 21.6755 | 0.1540 | -47.0881    |
| s_Clostridium_amosum          | IschemicStroke      | Inverse variance weighted | 17 | 1.0165 | 0.9965 | 1.0369 | 0.1070 | 0.0143  | 0.0093 | 0.1464 | 21.6755 | 0.1540 | -47.0881    |
| s_Clostridium_amosum          | IschemicStroke      | Simple mode               | 17 | 1.0131 | 0.9698 | 1.0583 | 0.5677 | 0.0143  | 0.0093 | 0.1464 | 21.6755 | 0.1540 | -47.0881    |
| s_Clostridium_amosum          | IschemicStroke      | Weighted mode             | 17 | 1.0025 | 0.9706 | 1.0355 | 0.8799 | 0.0143  | 0.0093 | 0.1464 | 21.6755 | 0.1540 | -47.0881    |
| s_Clostridium_amosum          | LargeArteryStroke   | MR Egger                  | 12 | 0.9808 | 0.8518 | 1.1294 | 0.7932 | 0.0367  | 0.0335 | 0.2998 | 14.1635 | 0.2241 | -21.4921    |
| s_Clostridium_amosum          | LargeArteryStroke   | Weighted median           | 12 | 1.0667 | 0.9695 | 1.1737 | 0.1852 | 0.0367  | 0.0335 | 0.2998 | 14.1635 | 0.2241 | -21.4921    |
| s_Clostridium_amosum          | LargeArteryStroke   | Inverse variance weighted | 12 | 1.0495 | 0.9760 | 1.1285 | 0.1919 | 0.0367  | 0.0335 | 0.2998 | 14.1635 | 0.2241 | -21.4921    |
| s_Clostridium_amosum          | LargeArteryStroke   | Simple mode               | 12 | 1.1283 | 0.9337 | 1.3634 | 0.2373 | 0.0367  | 0.0335 | 0.2998 | 14.1635 | 0.2241 | -21.4921    |
| s_Clostridium_amosum          | LargeArteryStroke   | Weighted mode             | 12 | 1.1302 | 0.9463 | 1.3497 | 0.2039 | 0.0367  | 0.0335 | 0.2998 | 14.1635 | 0.2241 | -21.4921    |
| s_Clostridium_amosum          | SmallVesselStroke   | MR Egger                  | 15 | 0.9919 | 0.9263 | 1.0621 | 0.8193 | 0.0100  | 0.0174 | 0.5727 | 16.1325 | 0.2420 | -31.0475    |
| s_Clostridium_amosum          | SmallVesselStroke   | Weighted median           | 15 | 1.0198 | 0.9701 | 1.0721 | 0.4419 | 0.0100  | 0.0174 | 0.5727 | 16.1325 | 0.2420 | -31.0475    |
| s_Clostridium_amosum          | SmallVesselStroke   | Inverse variance weighted | 15 | 1.0090 | 0.9737 | 1.0456 | 0.6227 | 0.0100  | 0.0174 | 0.5727 | 16.1325 | 0.2420 | -31.0475    |
| s_Clostridium_amosum          | SmallVesselStroke   | Simple mode               | 15 | 1.0168 | 0.9399 | 1.0999 | 0.6843 | 0.0100  | 0.0174 | 0.5727 | 16.1325 | 0.2420 | -31.0475    |
| s_Clostridium_amosum          | SmallVesselStroke   | Weighted mode             | 15 | 1.0179 | 0.9512 | 1.0893 | 0.6165 | 0.0100  | 0.0174 | 0.5727 | 16.1325 | 0.2420 | -31.0475    |
| s_Clostridium_amosum          | Stroke              | MR Egger                  | 17 | 1.0083 | 0.9699 | 1.0482 | 0.6819 | 0.0038  | 0.0087 | 0.6661 | 14.2043 | 0.5101 | -85.4720    |
| s_Clostridium_amosum          | Stroke              | Weighted median           | 17 | 1.0120 | 0.9880 | 1.0367 | 0.3297 | 0.0038  | 0.0087 | 0.6661 | 14.2043 | 0.5101 | -85.4720    |
| s_Clostridium_amosum          | Stroke              | Inverse variance weighted | 17 | 1.0162 | 0.9989 | 1.0339 | 0.0674 | 0.0038  | 0.0087 | 0.6661 | 14.2043 | 0.5101 | -85.4720    |
| s_Clostridium_amosum          | Stroke              | Simple mode               | 17 | 1.0131 | 0.9729 | 1.0549 | 0.5380 | 0.0038  | 0.0087 | 0.6661 | 14.2043 | 0.5101 | -85.4720    |
| s_Clostridium_amosum          | Stroke              | Weighted mode             | 17 | 1.0135 | 0.9779 | 1.0503 | 0.4738 | 0.0038  | 0.0087 | 0.6661 | 14.2043 | 0.5101 | -85.4720    |
| s_Clostridium_saccharolyticum | CardioEmbolicStroke | MR Egger                  | 8  | 1.5618 | 0.5286 | 4.6138 | 0.4507 | -0.0647 | 0.0913 | 0.5054 | 10.4889 | 0.1055 | 20.2820     |
| s_Clostridium_saccharolyticum | CardioEmbolicStroke | Weighted median           | 8  | 1.0715 | 0.7522 | 1.5263 | 0.7020 | -0.0647 | 0.0913 | 0.5054 | 10.4889 | 0.1055 | 20.2820     |
| s_Clostridium_saccharolyticum | CardioEmbolicStroke | Inverse variance weighted | 8  | 1.0750 | 0.7867 | 1.4689 | 0.6499 | -0.0647 | 0.0913 | 0.5054 | 10.4889 | 0.1055 | 20.2820     |
| s_Clostridium_saccharolyticum | CardioEmbolicStroke | Simple mode               | 8  | 1.3620 | 0.8063 | 2.3007 | 0.2859 | -0.0647 | 0.0913 | 0.5054 | 10.4889 | 0.1055 | 20.2820     |
| s_Clostridium_saccharolyticum | CardioEmbolicStroke | Weighted mode             | 8  | 1.1484 | 0.7122 | 1.8517 | 0.5881 | -0.0647 | 0.0913 | 0.5054 | 10.4889 | 0.1055 | 20.2820     |
| s_Clostridium_saccharolyticum | IschemicStroke      | MR Egger                  | 15 | 0.9862 | 0.8848 | 1.0992 | 0.8052 | 0.0005  | 0.0108 | 0.9670 | 8.2674  | 0.8258 | -1250.2247  |
| s_Clostridium_saccharolyticum | IschemicStroke      | Weighted median           | 15 | 0.9991 | 0.9429 | 1.0586 | 0.9749 | 0.0005  | 0.0108 | 0.9670 | 8.2674  | 0.8258 | -1250.2247  |
| s_Clostridium_saccharolyticum | IschemicStroke      | Inverse variance weighted | 15 | 0.9883 | 0.9453 | 1.0332 | 0.6028 | 0.0005  | 0.0108 | 0.9670 | 8.2674  | 0.8258 | -1250.2247  |
| s_Clostridium_saccharolyticum | IschemicStroke      | Simple mode               | 15 | 1.0020 | 0.9209 | 1.0904 | 0.9632 | 0.0005  | 0.0108 | 0.9670 | 8.2674  | 0.8258 | -1250.2247  |
| s_Clostridium_saccharolyticum | IschemicStroke      | Weighted mode             | 15 | 1.0072 | 0.9260 | 1.0956 | 0.8689 | 0.0005  | 0.0108 | 0.9670 | 8.2674  | 0.8258 | -1250.2247  |
| s_Clostridium_saccharolyticum | LargeArteryStroke   | MR Egger                  | 11 | 0.8332 | 0.5614 | 1.2366 | 0.3887 | 0.0314  | 0.0378 | 0.4277 | 7.3818  | 0.5974 | 609.3400    |
| s_Clostridium_saccharolyticum | LargeArteryStroke   | Weighted median           | 11 | 1.0329 | 0.8398 | 1.2704 | 0.7590 | 0.0314  | 0.0378 | 0.4277 | 7.3818  | 0.5974 | 609.3400    |
| s_Clostridium_saccharolyticum | LargeArteryStroke   | Inverse variance weighted | 11 | 0.9718 | 0.8324 | 1.1347 | 0.7178 | 0.0314  | 0.0378 | 0.4277 | 7.3818  | 0.5974 | 609.3400    |
| s_Clostridium_saccharolyticum | LargeArteryStroke   | Simple mode               | 11 | 1.0142 | 0.7263 | 1.4163 | 0.9356 | 0.0314  | 0.0378 | 0.4277 | 7.3818  | 0.5974 | 609.3400    |
| s_Clostridium_saccharolyticum | LargeArteryStroke   | Weighted mode             | 11 | 1.0259 | 0.7464 | 1.4099 | 0.8781 | 0.0314  | 0.0378 | 0.4277 | 7.3818  | 0.5974 | 609.3400    |
| s_Clostridium_saccharolyticum | SmallVesselStroke   | MR Egger                  | 12 | 1.0821 | 0.8815 | 1.3282 | 0.4682 | -0.0172 | 0.0201 | 0.4118 | 5.5182  | 0.8540 | 959144.3120 |
| s_Clostridium_saccharolyticum | SmallVesselStroke   | Weighted median           | 12 | 0.9991 | 0.8910 | 1.1203 | 0.9876 | -0.0172 | 0.0201 | 0.4118 | 5.5182  | 0.8540 | 959144.3120 |
| s_Clostridium_saccharolyticum | SmallVesselStroke   | Inverse variance weighted | 12 | 0.9971 | 0.9169 | 1.0843 | 0.9464 | -0.0172 | 0.0201 | 0.4118 | 5.5182  | 0.8540 | 959144.3120 |
| s_Clostridium_saccharolyticum | SmallVesselStroke   | Simple mode               | 12 | 1.0138 | 0.8522 | 1.2061 | 0.8799 | -0.0172 | 0.0201 | 0.4118 | 5.5182  | 0.8540 | 959144.3120 |
| s_Clostridium_saccharolyticum | SmallVesselStroke   | Weighted mode             | 12 | 0.9964 | 0.8432 | 1.1774 | 0.9666 | -0.0172 | 0.0201 | 0.4118 | 5.5182  | 0.8540 | 959144.3120 |
| s_Clostridium_saccharolyticum | Stroke              | MR Egger                  | 15 | 1.0020 | 0.9071 | 1.1068 | 0.9694 | -0.0047 | 0.0100 | 0.6480 | 15.2785 | 0.2903 | -1456.0695  |
| s_Clostridium_saccharolyticum | Stroke              | Weighted median           | 15 | 0.9938 | 0.9445 | 1.0456 | 0.8101 | -0.0047 | 0.0100 | 0.6480 | 15.2785 | 0.2903 | -1456.0695  |
| s_Clostridium_saccharolyticum | Stroke              | Inverse variance weighted | 15 | 0.9806 | 0.9418 | 1.0210 | 0.3419 | -0.0047 | 0.0100 | 0.6480 | 15.2785 | 0.2903 | -1456.0695  |
| s_Clostridium_saccharolyticum | Stroke              | Simple mode               | 15 | 1.0206 | 0.9321 | 1.1174 | 0.6662 | -0.0047 | 0.0100 | 0.6480 | 15.2785 | 0.2903 | -1456.0695  |

|                               |                     |                           |    |        |        |        |        |         |        |        |         |        |            |
|-------------------------------|---------------------|---------------------------|----|--------|--------|--------|--------|---------|--------|--------|---------|--------|------------|
| s_Clostridium_saccharolyticum | Stroke              | Weighted mode             | 15 | 1.0181 | 0.9372 | 1.1059 | 0.6783 | -0.0047 | 0.0100 | 0.6480 | 15.2785 | 0.2903 | -1456.0695 |
| s_Clostridium_spiroforme      | CardioEmbolicStroke | MR Egger                  | 6  | 1.3277 | 0.7689 | 2.2927 | 0.3667 | -0.0814 | 0.0839 | 0.3867 | 4.7247  | 0.3167 | 683.0238   |
| s_Clostridium_spiroforme      | CardioEmbolicStroke | Weighted median           | 6  | 1.0129 | 0.8169 | 1.2559 | 0.9070 | -0.0814 | 0.0839 | 0.3867 | 4.7247  | 0.3167 | 683.0238   |
| s_Clostridium_spiroforme      | CardioEmbolicStroke | Inverse variance weighted | 6  | 1.0278 | 0.8625 | 1.2246 | 0.7594 | -0.0814 | 0.0839 | 0.3867 | 4.7247  | 0.3167 | 683.0238   |
| s_Clostridium_spiroforme      | CardioEmbolicStroke | Simple mode               | 6  | 0.9696 | 0.6898 | 1.3628 | 0.8658 | -0.0814 | 0.0839 | 0.3867 | 4.7247  | 0.3167 | 683.0238   |
| s_Clostridium_spiroforme      | CardioEmbolicStroke | Weighted mode             | 6  | 1.0148 | 0.7468 | 1.3789 | 0.9289 | -0.0814 | 0.0839 | 0.3867 | 4.7247  | 0.3167 | 683.0238   |
| s_Clostridium_spiroforme      | IschemicStroke      | MR Egger                  | 12 | 1.0431 | 0.9662 | 1.1261 | 0.3051 | -0.0189 | 0.0142 | 0.2133 | 17.4402 | 0.0955 | -67.3183   |
| s_Clostridium_spiroforme      | IschemicStroke      | Weighted median           | 12 | 1.0243 | 0.9808 | 1.0698 | 0.2785 | -0.0189 | 0.0142 | 0.2133 | 17.4402 | 0.0955 | -67.3183   |
| s_Clostridium_spiroforme      | IschemicStroke      | Inverse variance weighted | 12 | 0.9963 | 0.9603 | 1.0336 | 0.8413 | -0.0189 | 0.0142 | 0.2133 | 17.4402 | 0.0955 | -67.3183   |
| s_Clostridium_spiroforme      | IschemicStroke      | Simple mode               | 12 | 1.0313 | 0.9574 | 1.1108 | 0.4340 | -0.0189 | 0.0142 | 0.2133 | 17.4402 | 0.0955 | -67.3183   |
| s_Clostridium_spiroforme      | IschemicStroke      | Weighted mode             | 12 | 1.0304 | 0.9730 | 1.0911 | 0.3277 | -0.0189 | 0.0142 | 0.2133 | 17.4402 | 0.0955 | -67.3183   |
| s_Clostridium_spiroforme      | LargeArteryStroke   | MR Egger                  | 7  | 1.1125 | 0.7632 | 1.6216 | 0.6032 | -0.0130 | 0.0599 | 0.8369 | 6.5042  | 0.2602 | -2074.6225 |
| s_Clostridium_spiroforme      | LargeArteryStroke   | Weighted median           | 7  | 1.0461 | 0.8890 | 1.2311 | 0.5870 | -0.0130 | 0.0599 | 0.8369 | 6.5042  | 0.2602 | -2074.6225 |
| s_Clostridium_spiroforme      | LargeArteryStroke   | Inverse variance weighted | 7  | 1.0699 | 0.9478 | 1.2076 | 0.2743 | -0.0130 | 0.0599 | 0.8369 | 6.5042  | 0.2602 | -2074.6225 |
| s_Clostridium_spiroforme      | LargeArteryStroke   | Simple mode               | 7  | 1.2387 | 0.9459 | 1.6220 | 0.1707 | -0.0130 | 0.0599 | 0.8369 | 6.5042  | 0.2602 | -2074.6225 |
| s_Clostridium_spiroforme      | LargeArteryStroke   | Weighted mode             | 7  | 1.0229 | 0.8262 | 1.2663 | 0.8424 | -0.0130 | 0.0599 | 0.8369 | 6.5042  | 0.2602 | -2074.6225 |
| s_Clostridium_spiroforme      | SmallVesselStroke   | MR Egger                  | 8  | 1.1178 | 0.9541 | 1.3096 | 0.2171 | -0.0327 | 0.0262 | 0.2591 | 4.2099  | 0.7553 | -420.0617  |
| s_Clostridium_spiroforme      | SmallVesselStroke   | Weighted median           | 8  | 1.0184 | 0.9422 | 1.1008 | 0.6456 | -0.0327 | 0.0262 | 0.2591 | 4.2099  | 0.7553 | -420.0617  |
| s_Clostridium_spiroforme      | SmallVesselStroke   | Inverse variance weighted | 8  | 1.0188 | 0.9581 | 1.0832 | 0.5529 | -0.0327 | 0.0262 | 0.2591 | 4.2099  | 0.7553 | -420.0617  |
| s_Clostridium_spiroforme      | SmallVesselStroke   | Simple mode               | 8  | 1.0100 | 0.8991 | 1.1346 | 0.8713 | -0.0327 | 0.0262 | 0.2591 | 4.2099  | 0.7553 | -420.0617  |
| s_Clostridium_spiroforme      | SmallVesselStroke   | Weighted mode             | 8  | 1.0270 | 0.9231 | 1.1426 | 0.6395 | -0.0327 | 0.0262 | 0.2591 | 4.2099  | 0.7553 | -420.0617  |
| s_Clostridium_spiroforme      | Stroke              | MR Egger                  | 13 | 1.0240 | 0.9737 | 1.0768 | 0.3760 | -0.0127 | 0.0100 | 0.2284 | 15.2769 | 0.2266 | -75.9531   |
| s_Clostridium_spiroforme      | Stroke              | Weighted median           | 13 | 1.0128 | 0.9801 | 1.0465 | 0.4482 | -0.0127 | 0.0100 | 0.2284 | 15.2769 | 0.2266 | -75.9531   |
| s_Clostridium_spiroforme      | Stroke              | Inverse variance weighted | 13 | 0.9956 | 0.9696 | 1.0222 | 0.7420 | -0.0127 | 0.0100 | 0.2284 | 15.2769 | 0.2266 | -75.9531   |
| s_Clostridium_spiroforme      | Stroke              | Simple mode               | 13 | 1.0202 | 0.9672 | 1.0760 | 0.4769 | -0.0127 | 0.0100 | 0.2284 | 15.2769 | 0.2266 | -75.9531   |
| s_Clostridium_spiroforme      | Stroke              | Weighted mode             | 13 | 1.0162 | 0.9713 | 1.0631 | 0.4993 | -0.0127 | 0.0100 | 0.2284 | 15.2769 | 0.2266 | -75.9531   |
| s_Collinsella_aerofaciens     | CardioEmbolicStroke | MR Egger                  | 14 | 0.9402 | 0.8669 | 1.0196 | 0.1620 | 0.0488  | 0.0298 | 0.1275 | 12.8042 | 0.4630 | -19.4674   |
| s_Collinsella_aerofaciens     | CardioEmbolicStroke | Weighted median           | 14 | 0.9692 | 0.9151 | 1.0266 | 0.2863 | 0.0488  | 0.0298 | 0.1275 | 12.8042 | 0.4630 | -19.4674   |
| s_Collinsella_aerofaciens     | CardioEmbolicStroke | Inverse variance weighted | 14 | 0.9953 | 0.9526 | 1.0400 | 0.8340 | 0.0488  | 0.0298 | 0.1275 | 12.8042 | 0.4630 | -19.4674   |
| s_Collinsella_aerofaciens     | CardioEmbolicStroke | Simple mode               | 14 | 0.9916 | 0.9077 | 1.0832 | 0.8539 | 0.0488  | 0.0298 | 0.1275 | 12.8042 | 0.4630 | -19.4674   |
| s_Collinsella_aerofaciens     | CardioEmbolicStroke | Weighted mode             | 14 | 0.9738 | 0.9166 | 1.0346 | 0.4064 | 0.0488  | 0.0298 | 0.1275 | 12.8042 | 0.4630 | -19.4674   |
| s_Collinsella_aerofaciens     | IschemicStroke      | MR Egger                  | 18 | 1.0111 | 0.9929 | 1.0297 | 0.2520 | -0.0089 | 0.0066 | 0.1932 | 13.2021 | 0.7226 | -56.8852   |
| s_Collinsella_aerofaciens     | IschemicStroke      | Weighted median           | 18 | 1.0042 | 0.9903 | 1.0183 | 0.5572 | -0.0089 | 0.0066 | 0.1932 | 13.2021 | 0.7226 | -56.8852   |
| s_Collinsella_aerofaciens     | IschemicStroke      | Inverse variance weighted | 18 | 1.0004 | 0.9907 | 1.0101 | 0.9414 | -0.0089 | 0.0066 | 0.1932 | 13.2021 | 0.7226 | -56.8852   |
| s_Collinsella_aerofaciens     | IschemicStroke      | Simple mode               | 18 | 0.9792 | 0.9558 | 1.0033 | 0.1082 | -0.0089 | 0.0066 | 0.1932 | 13.2021 | 0.7226 | -56.8852   |
| s_Collinsella_aerofaciens     | IschemicStroke      | Weighted mode             | 18 | 1.0060 | 0.9910 | 1.0213 | 0.4451 | -0.0089 | 0.0066 | 0.1932 | 13.2021 | 0.7226 | -56.8852   |
| s_Collinsella_aerofaciens     | LargeArteryStroke   | MR Egger                  | 15 | 1.0267 | 0.9666 | 1.0904 | 0.4076 | -0.0190 | 0.0222 | 0.4087 | 7.5362  | 0.8724 | -16.3804   |
| s_Collinsella_aerofaciens     | LargeArteryStroke   | Weighted median           | 15 | 1.0100 | 0.9651 | 1.0569 | 0.6689 | -0.0190 | 0.0222 | 0.4087 | 7.5362  | 0.8724 | -16.3804   |
| s_Collinsella_aerofaciens     | LargeArteryStroke   | Inverse variance weighted | 15 | 1.0042 | 0.9721 | 1.0374 | 0.7994 | -0.0190 | 0.0222 | 0.4087 | 7.5362  | 0.8724 | -16.3804   |
| s_Collinsella_aerofaciens     | LargeArteryStroke   | Simple mode               | 15 | 0.9638 | 0.8970 | 1.0355 | 0.3305 | -0.0190 | 0.0222 | 0.4087 | 7.5362  | 0.8724 | -16.3804   |
| s_Collinsella_aerofaciens     | LargeArteryStroke   | Weighted mode             | 15 | 1.0070 | 0.9610 | 1.0551 | 0.7755 | -0.0190 | 0.0222 | 0.4087 | 7.5362  | 0.8724 | -16.3804   |
| s_Collinsella_aerofaciens     | SmallVesselStroke   | MR Egger                  | 15 | 1.0059 | 0.9728 | 1.0402 | 0.7345 | 0.0008  | 0.0123 | 0.9508 | 8.5452  | 0.8064 | -50.8208   |
| s_Collinsella_aerofaciens     | SmallVesselStroke   | Weighted median           | 15 | 1.0105 | 0.9863 | 1.0353 | 0.3975 | 0.0008  | 0.0123 | 0.9508 | 8.5452  | 0.8064 | -50.8208   |
| s_Collinsella_aerofaciens     | SmallVesselStroke   | Inverse variance weighted | 15 | 1.0068 | 0.9888 | 1.0252 | 0.4595 | 0.0008  | 0.0123 | 0.9508 | 8.5452  | 0.8064 | -50.8208   |
| s_Collinsella_aerofaciens     | SmallVesselStroke   | Simple mode               | 15 | 1.0160 | 0.9773 | 1.0563 | 0.4359 | 0.0008  | 0.0123 | 0.9508 | 8.5452  | 0.8064 | -50.8208   |
| s_Collinsella_aerofaciens     | SmallVesselStroke   | Weighted mode             | 15 | 1.0118 | 0.9871 | 1.0371 | 0.3667 | 0.0008  | 0.0123 | 0.9508 | 8.5452  | 0.8064 | -50.8208   |
| s_Collinsella_aerofaciens     | Stroke              | MR Egger                  | 19 | 1.0142 | 0.9974 | 1.0314 | 0.1166 | -0.0150 | 0.0059 | 0.0215 | 24.9588 | 0.1261 | -64.2177   |
| s_Collinsella_aerofaciens     | Stroke              | Weighted median           | 19 | 1.0042 | 0.9914 | 1.0173 | 0.5194 | -0.0150 | 0.0059 | 0.0215 | 24.9588 | 0.1261 | -64.2177   |
| s_Collinsella_aerofaciens     | Stroke              | Inverse variance weighted | 19 | 0.9958 | 0.9858 | 1.0058 | 0.4083 | -0.0150 | 0.0059 | 0.0215 | 24.9588 | 0.1261 | -64.2177   |
| s_Collinsella_aerofaciens     | Stroke              | Simple mode               | 19 | 0.9940 | 0.9743 | 1.0142 | 0.5666 | -0.0150 | 0.0059 | 0.0215 | 24.9588 | 0.1261 | -64.2177   |
| s_Collinsella_aerofaciens     | Stroke              | Weighted mode             | 19 | 1.0036 | 0.9909 | 1.0164 | 0.5908 | -0.0150 | 0.0059 | 0.0215 | 24.9588 | 0.1261 | -64.2177   |
| s_Coproccoccus_catus          | CardioEmbolicStroke | MR Egger                  | 16 | 0.9910 | 0.7532 | 1.3040 | 0.9495 | 0.0247  | 0.0348 | 0.4906 | 26.6725 | 0.0212 | -20.2000   |
| s_Coproccoccus_catus          | CardioEmbolicStroke | Weighted median           | 16 | 1.1354 | 0.9248 | 1.3939 | 0.2250 | 0.0247  | 0.0348 | 0.4906 | 26.6725 | 0.0212 | -20.2000   |

|                        |                     |                           |    |        |        |        |        |         |        |        |         |        |            |
|------------------------|---------------------|---------------------------|----|--------|--------|--------|--------|---------|--------|--------|---------|--------|------------|
| s_Coprococcus_catus    | CardioEmbolicStroke | Inverse variance weighted | 16 | 1.0715 | 0.9073 | 1.2653 | 0.4158 | 0.0247  | 0.0348 | 0.4906 | 26.6725 | 0.0212 | -20.2000   |
| s_Coprococcus_catus    | CardioEmbolicStroke | Simple mode               | 16 | 1.2385 | 0.8573 | 1.7893 | 0.2723 | 0.0247  | 0.0348 | 0.4906 | 26.6725 | 0.0212 | -20.2000   |
| s_Coprococcus_catus    | CardioEmbolicStroke | Weighted mode             | 16 | 1.2385 | 0.9684 | 1.5840 | 0.1090 | 0.0247  | 0.0348 | 0.4906 | 26.6725 | 0.0212 | -20.2000   |
| s_Coprococcus_catus    | IschemicStroke      | MR Egger                  | 22 | 0.9743 | 0.9290 | 1.0219 | 0.2979 | 0.0059  | 0.0064 | 0.3651 | 24.8933 | 0.2055 | -85.1100   |
| s_Coprococcus_catus    | IschemicStroke      | Weighted median           | 22 | 0.9885 | 0.9498 | 1.0289 | 0.5717 | 0.0059  | 0.0064 | 0.3651 | 24.8933 | 0.2055 | -85.1100   |
| s_Coprococcus_catus    | IschemicStroke      | Inverse variance weighted | 22 | 0.9919 | 0.9635 | 1.0211 | 0.5818 | 0.0059  | 0.0064 | 0.3651 | 24.8933 | 0.2055 | -85.1100   |
| s_Coprococcus_catus    | IschemicStroke      | Simple mode               | 22 | 0.9518 | 0.8945 | 1.0128 | 0.1340 | 0.0059  | 0.0064 | 0.3651 | 24.8933 | 0.2055 | -85.1100   |
| s_Coprococcus_catus    | IschemicStroke      | Weighted mode             | 22 | 0.9873 | 0.9441 | 1.0325 | 0.5815 | 0.0059  | 0.0064 | 0.3651 | 24.8933 | 0.2055 | -85.1100   |
| s_Coprococcus_catus    | LargeArteryStroke   | MR Egger                  | 19 | 1.0695 | 0.9118 | 1.2545 | 0.4206 | -0.0036 | 0.0202 | 0.8610 | 18.9620 | 0.3307 | -30.3495   |
| s_Coprococcus_catus    | LargeArteryStroke   | Weighted median           | 19 | 1.0992 | 0.9618 | 1.2562 | 0.1650 | -0.0036 | 0.0202 | 0.8610 | 18.9620 | 0.3307 | -30.3495   |
| s_Coprococcus_catus    | LargeArteryStroke   | Inverse variance weighted | 19 | 1.0572 | 0.9632 | 1.1603 | 0.2415 | -0.0036 | 0.0202 | 0.8610 | 18.9620 | 0.3307 | -30.3495   |
| s_Coprococcus_catus    | LargeArteryStroke   | Simple mode               | 19 | 1.2324 | 0.9638 | 1.5757 | 0.1130 | -0.0036 | 0.0202 | 0.8610 | 18.9620 | 0.3307 | -30.3495   |
| s_Coprococcus_catus    | LargeArteryStroke   | Weighted mode             | 19 | 1.0829 | 0.9192 | 1.2757 | 0.3537 | -0.0036 | 0.0202 | 0.8610 | 18.9620 | 0.3307 | -30.3495   |
| s_Coprococcus_catus    | SmallVesselStroke   | MR Egger                  | 20 | 0.9303 | 0.8512 | 1.0168 | 0.1288 | 0.0170  | 0.0117 | 0.1649 | 25.6132 | 0.1413 | -59.8828   |
| s_Coprococcus_catus    | SmallVesselStroke   | Weighted median           | 20 | 0.9851 | 0.9075 | 1.0695 | 0.7208 | 0.0170  | 0.0117 | 0.1649 | 25.6132 | 0.1413 | -59.8828   |
| s_Coprococcus_catus    | SmallVesselStroke   | Inverse variance weighted | 20 | 0.9800 | 0.9269 | 1.0363 | 0.4786 | 0.0170  | 0.0117 | 0.1649 | 25.6132 | 0.1413 | -59.8828   |
| s_Coprococcus_catus    | SmallVesselStroke   | Simple mode               | 20 | 1.0644 | 0.8804 | 1.2867 | 0.5271 | 0.0170  | 0.0117 | 0.1649 | 25.6132 | 0.1413 | -59.8828   |
| s_Coprococcus_catus    | SmallVesselStroke   | Weighted mode             | 20 | 0.8909 | 0.7542 | 1.0522 | 0.1896 | 0.0170  | 0.0117 | 0.1649 | 25.6132 | 0.1413 | -59.8828   |
| s_Coprococcus_catus    | Stroke              | MR Egger                  | 21 | 0.9535 | 0.9068 | 1.0026 | 0.0789 | 0.0104  | 0.0059 | 0.0925 | 25.9999 | 0.1658 | -166.7701  |
| s_Coprococcus_catus    | Stroke              | Weighted median           | 21 | 0.9777 | 0.9396 | 1.0174 | 0.2666 | 0.0104  | 0.0059 | 0.0925 | 25.9999 | 0.1658 | -166.7701  |
| s_Coprococcus_catus    | Stroke              | Inverse variance weighted | 21 | 0.9901 | 0.9612 | 1.0198 | 0.5093 | 0.0104  | 0.0059 | 0.0925 | 25.9999 | 0.1658 | -166.7701  |
| s_Coprococcus_catus    | Stroke              | Simple mode               | 21 | 0.9639 | 0.9061 | 1.0254 | 0.2574 | 0.0104  | 0.0059 | 0.0925 | 25.9999 | 0.1658 | -166.7701  |
| s_Coprococcus_catus    | Stroke              | Weighted mode             | 21 | 0.9719 | 0.9272 | 1.0187 | 0.2483 | 0.0104  | 0.0059 | 0.0925 | 25.9999 | 0.1658 | -166.7701  |
| s_Coprococcus_eutactus | CardioEmbolicStroke | MR Egger                  | 10 | 1.5902 | 0.9522 | 2.6558 | 0.1142 | -0.1461 | 0.0817 | 0.1114 | 7.0741  | 0.6294 | -3374.9118 |
| s_Coprococcus_eutactus | CardioEmbolicStroke | Weighted median           | 10 | 1.0164 | 0.8696 | 1.1880 | 0.8381 | -0.1461 | 0.0817 | 0.1114 | 7.0741  | 0.6294 | -3374.9118 |
| s_Coprococcus_eutactus | CardioEmbolicStroke | Inverse variance weighted | 10 | 1.0079 | 0.8973 | 1.1321 | 0.8946 | -0.1461 | 0.0817 | 0.1114 | 7.0741  | 0.6294 | -3374.9118 |
| s_Coprococcus_eutactus | CardioEmbolicStroke | Simple mode               | 10 | 0.9784 | 0.7532 | 1.2709 | 0.8734 | -0.1461 | 0.0817 | 0.1114 | 7.0741  | 0.6294 | -3374.9118 |
| s_Coprococcus_eutactus | CardioEmbolicStroke | Weighted mode             | 10 | 1.0148 | 0.7867 | 1.3089 | 0.9126 | -0.1461 | 0.0817 | 0.1114 | 7.0741  | 0.6294 | -3374.9118 |
| s_Coprococcus_eutactus | IschemicStroke      | MR Egger                  | 19 | 1.0167 | 0.9628 | 1.0735 | 0.5592 | -0.0101 | 0.0112 | 0.3808 | 30.6521 | 0.0316 | -29.1592   |
| s_Coprococcus_eutactus | IschemicStroke      | Weighted median           | 19 | 0.9857 | 0.9568 | 1.0155 | 0.3428 | -0.0101 | 0.0112 | 0.3808 | 30.6521 | 0.0316 | -29.1592   |
| s_Coprococcus_eutactus | IschemicStroke      | Inverse variance weighted | 19 | 0.9946 | 0.9692 | 1.0208 | 0.6840 | -0.0101 | 0.0112 | 0.3808 | 30.6521 | 0.0316 | -29.1592   |
| s_Coprococcus_eutactus | IschemicStroke      | Simple mode               | 19 | 0.9800 | 0.9306 | 1.0321 | 0.4543 | -0.0101 | 0.0112 | 0.3808 | 30.6521 | 0.0316 | -29.1592   |
| s_Coprococcus_eutactus | IschemicStroke      | Weighted mode             | 19 | 0.9800 | 0.9400 | 1.0217 | 0.3547 | -0.0101 | 0.0112 | 0.3808 | 30.6521 | 0.0316 | -29.1592   |
| s_Coprococcus_eutactus | LargeArteryStroke   | MR Egger                  | 15 | 1.1403 | 0.9532 | 1.3641 | 0.1747 | -0.0346 | 0.0338 | 0.3245 | 15.7211 | 0.3307 | -14.3918   |
| s_Coprococcus_eutactus | LargeArteryStroke   | Weighted median           | 15 | 1.0691 | 0.9684 | 1.1802 | 0.1858 | -0.0346 | 0.0338 | 0.3245 | 15.7211 | 0.3307 | -14.3918   |
| s_Coprococcus_eutactus | LargeArteryStroke   | Inverse variance weighted | 15 | 1.0474 | 0.9713 | 1.1295 | 0.2290 | -0.0346 | 0.0338 | 0.3245 | 15.7211 | 0.3307 | -14.3918   |
| s_Coprococcus_eutactus | LargeArteryStroke   | Simple mode               | 15 | 1.0622 | 0.9120 | 1.2371 | 0.4508 | -0.0346 | 0.0338 | 0.3245 | 15.7211 | 0.3307 | -14.3918   |
| s_Coprococcus_eutactus | LargeArteryStroke   | Weighted mode             | 15 | 1.0577 | 0.9162 | 1.2210 | 0.4566 | -0.0346 | 0.0338 | 0.3245 | 15.7211 | 0.3307 | -14.3918   |
| s_Coprococcus_eutactus | SmallVesselStroke   | MR Egger                  | 16 | 0.9685 | 0.8767 | 1.0700 | 0.5395 | 0.0009  | 0.0196 | 0.9657 | 20.0948 | 0.1272 | -16.8413   |
| s_Coprococcus_eutactus | SmallVesselStroke   | Weighted median           | 16 | 0.9710 | 0.9201 | 1.0247 | 0.2836 | 0.0009  | 0.0196 | 0.9657 | 20.0948 | 0.1272 | -16.8413   |
| s_Coprococcus_eutactus | SmallVesselStroke   | Inverse variance weighted | 16 | 0.9705 | 0.9289 | 1.0139 | 0.1794 | 0.0009  | 0.0196 | 0.9657 | 20.0948 | 0.1272 | -16.8413   |
| s_Coprococcus_eutactus | SmallVesselStroke   | Simple mode               | 16 | 0.9845 | 0.8928 | 1.0856 | 0.7579 | 0.0009  | 0.0196 | 0.9657 | 20.0948 | 0.1272 | -16.8413   |
| s_Coprococcus_eutactus | SmallVesselStroke   | Weighted mode             | 16 | 0.9751 | 0.8921 | 1.0658 | 0.5864 | 0.0009  | 0.0196 | 0.9657 | 20.0948 | 0.1272 | -16.8413   |
| s_Coprococcus_eutactus | Stroke              | MR Egger                  | 20 | 1.0087 | 0.9631 | 1.0564 | 0.7186 | -0.0080 | 0.0097 | 0.4191 | 32.1564 | 0.0211 | -34.4199   |
| s_Coprococcus_eutactus | Stroke              | Weighted median           | 20 | 1.0013 | 0.9762 | 1.0271 | 0.9207 | -0.0080 | 0.0097 | 0.4191 | 32.1564 | 0.0211 | -34.4199   |
| s_Coprococcus_eutactus | Stroke              | Inverse variance weighted | 20 | 0.9916 | 0.9698 | 1.0139 | 0.4589 | -0.0080 | 0.0097 | 0.4191 | 32.1564 | 0.0211 | -34.4199   |
| s_Coprococcus_eutactus | Stroke              | Simple mode               | 20 | 1.0041 | 0.9588 | 1.0516 | 0.8630 | -0.0080 | 0.0097 | 0.4191 | 32.1564 | 0.0211 | -34.4199   |
| s_Coprococcus_eutactus | Stroke              | Weighted mode             | 20 | 1.0010 | 0.9602 | 1.0434 | 0.9639 | -0.0080 | 0.0097 | 0.4191 | 32.1564 | 0.0211 | -34.4199   |
| s_Desulfovibrio_piger  | CardioEmbolicStroke | MR Egger                  | 11 | 0.9404 | 0.8564 | 1.0326 | 0.2299 | 0.0435  | 0.0387 | 0.2896 | 11.1008 | 0.3497 | -16.9826   |
| s_Desulfovibrio_piger  | CardioEmbolicStroke | Weighted median           | 11 | 0.9808 | 0.9175 | 1.0484 | 0.5683 | 0.0435  | 0.0387 | 0.2896 | 11.1008 | 0.3497 | -16.9826   |
| s_Desulfovibrio_piger  | CardioEmbolicStroke | Inverse variance weighted | 11 | 0.9842 | 0.9360 | 1.0349 | 0.5343 | 0.0435  | 0.0387 | 0.2896 | 11.1008 | 0.3497 | -16.9826   |
| s_Desulfovibrio_piger  | CardioEmbolicStroke | Simple mode               | 11 | 0.9643 | 0.8775 | 1.0597 | 0.4679 | 0.0435  | 0.0387 | 0.2896 | 11.1008 | 0.3497 | -16.9826   |
| s_Desulfovibrio_piger  | CardioEmbolicStroke | Weighted mode             | 11 | 0.9711 | 0.9007 | 1.0470 | 0.4624 | 0.0435  | 0.0387 | 0.2896 | 11.1008 | 0.3497 | -16.9826   |

|                         |                     |                           |    |        |        |        |        |         |        |        |         |        |           |
|-------------------------|---------------------|---------------------------|----|--------|--------|--------|--------|---------|--------|--------|---------|--------|-----------|
| s_Desulfovibrio_piger   | IschemicStroke      | MR Egger                  | 22 | 1.0042 | 0.9905 | 1.0181 | 0.5526 | -0.0015 | 0.0073 | 0.8351 | 23.5481 | 0.2627 | -15.9259  |
| s_Desulfovibrio_piger   | IschemicStroke      | Weighted median           | 22 | 1.0034 | 0.9912 | 1.0156 | 0.5888 | -0.0015 | 0.0073 | 0.8351 | 23.5481 | 0.2627 | -15.9259  |
| s_Desulfovibrio_piger   | IschemicStroke      | Inverse variance weighted | 22 | 1.0031 | 0.9948 | 1.0115 | 0.4695 | -0.0015 | 0.0073 | 0.8351 | 23.5481 | 0.2627 | -15.9259  |
| s_Desulfovibrio_piger   | IschemicStroke      | Simple mode               | 22 | 1.0059 | 0.9853 | 1.0269 | 0.5829 | -0.0015 | 0.0073 | 0.8351 | 23.5481 | 0.2627 | -15.9259  |
| s_Desulfovibrio_piger   | IschemicStroke      | Weighted mode             | 22 | 1.0036 | 0.9895 | 1.0180 | 0.6214 | -0.0015 | 0.0073 | 0.8351 | 23.5481 | 0.2627 | -15.9259  |
| s_Desulfovibrio_piger   | LargeArteryStroke   | MR Egger                  | 12 | 0.9861 | 0.9380 | 1.0366 | 0.5947 | 0.0043  | 0.0238 | 0.8591 | 2.9647  | 0.9822 | -28.4304  |
| s_Desulfovibrio_piger   | LargeArteryStroke   | Weighted median           | 12 | 0.9971 | 0.9576 | 1.0382 | 0.8873 | 0.0043  | 0.0238 | 0.8591 | 2.9647  | 0.9822 | -28.4304  |
| s_Desulfovibrio_piger   | LargeArteryStroke   | Inverse variance weighted | 12 | 0.9897 | 0.9599 | 1.0205 | 0.5080 | 0.0043  | 0.0238 | 0.8591 | 2.9647  | 0.9822 | -28.4304  |
| s_Desulfovibrio_piger   | LargeArteryStroke   | Simple mode               | 12 | 0.9881 | 0.9317 | 1.0480 | 0.6983 | 0.0043  | 0.0238 | 0.8591 | 2.9647  | 0.9822 | -28.4304  |
| s_Desulfovibrio_piger   | LargeArteryStroke   | Weighted mode             | 12 | 0.9937 | 0.9468 | 1.0429 | 0.8024 | 0.0043  | 0.0238 | 0.8591 | 2.9647  | 0.9822 | -28.4304  |
| s_Desulfovibrio_piger   | SmallVesselStroke   | MR Egger                  | 15 | 0.9879 | 0.9640 | 1.0124 | 0.3482 | 0.0215  | 0.0127 | 0.1139 | 14.6582 | 0.4019 | -13.6167  |
| s_Desulfovibrio_piger   | SmallVesselStroke   | Weighted median           | 15 | 0.9952 | 0.9739 | 1.0170 | 0.6633 | 0.0215  | 0.0127 | 0.1139 | 14.6582 | 0.4019 | -13.6167  |
| s_Desulfovibrio_piger   | SmallVesselStroke   | Inverse variance weighted | 15 | 1.0043 | 0.9885 | 1.0203 | 0.5995 | 0.0215  | 0.0127 | 0.1139 | 14.6582 | 0.4019 | -13.6167  |
| s_Desulfovibrio_piger   | SmallVesselStroke   | Simple mode               | 15 | 1.0175 | 0.9839 | 1.0522 | 0.3285 | 0.0215  | 0.0127 | 0.1139 | 14.6582 | 0.4019 | -13.6167  |
| s_Desulfovibrio_piger   | SmallVesselStroke   | Weighted mode             | 15 | 0.9947 | 0.9696 | 1.0205 | 0.6914 | 0.0215  | 0.0127 | 0.1139 | 14.6582 | 0.4019 | -13.6167  |
| s_Desulfovibrio_piger   | Stroke              | MR Egger                  | 23 | 1.0030 | 0.9881 | 1.0182 | 0.6970 | -0.0018 | 0.0075 | 0.8122 | 34.4569 | 0.0324 | -13.4809  |
| s_Desulfovibrio_piger   | Stroke              | Weighted median           | 23 | 0.9996 | 0.9889 | 1.0104 | 0.9417 | -0.0018 | 0.0075 | 0.8122 | 34.4569 | 0.0324 | -13.4809  |
| s_Desulfovibrio_piger   | Stroke              | Inverse variance weighted | 23 | 1.0016 | 0.9927 | 1.0105 | 0.7314 | -0.0018 | 0.0075 | 0.8122 | 34.4569 | 0.0324 | -13.4809  |
| s_Desulfovibrio_piger   | Stroke              | Simple mode               | 23 | 0.9985 | 0.9789 | 1.0185 | 0.8835 | -0.0018 | 0.0075 | 0.8122 | 34.4569 | 0.0324 | -13.4809  |
| s_Desulfovibrio_piger   | Stroke              | Weighted mode             | 23 | 1.0005 | 0.9863 | 1.0149 | 0.9500 | -0.0018 | 0.0075 | 0.8122 | 34.4569 | 0.0324 | -13.4809  |
| s_Dorea_formicigenerans | CardioEmbolicStroke | MR Egger                  | 12 | 0.9371 | 0.5642 | 1.5564 | 0.8070 | -0.0024 | 0.0502 | 0.9623 | 6.0307  | 0.8127 | 200.8958  |
| s_Dorea_formicigenerans | CardioEmbolicStroke | Weighted median           | 12 | 0.9581 | 0.7416 | 1.2379 | 0.7434 | -0.0024 | 0.0502 | 0.9623 | 6.0307  | 0.8127 | 200.8958  |
| s_Dorea_formicigenerans | CardioEmbolicStroke | Inverse variance weighted | 12 | 0.9262 | 0.7754 | 1.1062 | 0.3975 | -0.0024 | 0.0502 | 0.9623 | 6.0307  | 0.8127 | 200.8958  |
| s_Dorea_formicigenerans | CardioEmbolicStroke | Simple mode               | 12 | 0.9103 | 0.6246 | 1.3267 | 0.6344 | -0.0024 | 0.0502 | 0.9623 | 6.0307  | 0.8127 | 200.8958  |
| s_Dorea_formicigenerans | CardioEmbolicStroke | Weighted mode             | 12 | 0.9287 | 0.6879 | 1.2538 | 0.6385 | -0.0024 | 0.0502 | 0.9623 | 6.0307  | 0.8127 | 200.8958  |
| s_Dorea_formicigenerans | IschemicStroke      | MR Egger                  | 18 | 0.9741 | 0.9148 | 1.0372 | 0.4250 | 0.0094  | 0.0077 | 0.2386 | 13.6884 | 0.6890 | -281.1058 |
| s_Dorea_formicigenerans | IschemicStroke      | Weighted median           | 18 | 0.9971 | 0.9555 | 1.0405 | 0.8936 | 0.0094  | 0.0077 | 0.2386 | 13.6884 | 0.6890 | -281.1058 |
| s_Dorea_formicigenerans | IschemicStroke      | Inverse variance weighted | 18 | 1.0076 | 0.9761 | 1.0402 | 0.6399 | 0.0094  | 0.0077 | 0.2386 | 13.6884 | 0.6890 | -281.1058 |
| s_Dorea_formicigenerans | IschemicStroke      | Simple mode               | 18 | 0.9891 | 0.9190 | 1.0646 | 0.7742 | 0.0094  | 0.0077 | 0.2386 | 13.6884 | 0.6890 | -281.1058 |
| s_Dorea_formicigenerans | IschemicStroke      | Weighted mode             | 18 | 0.9977 | 0.9390 | 1.0599 | 0.9403 | 0.0094  | 0.0077 | 0.2386 | 13.6884 | 0.6890 | -281.1058 |
| s_Dorea_formicigenerans | LargeArteryStroke   | MR Egger                  | 16 | 0.9488 | 0.7374 | 1.2207 | 0.6888 | 0.0200  | 0.0293 | 0.5066 | 16.3806 | 0.2907 | -62.0150  |
| s_Dorea_formicigenerans | LargeArteryStroke   | Weighted median           | 16 | 0.9477 | 0.8018 | 1.1201 | 0.5284 | 0.0200  | 0.0293 | 0.5066 | 16.3806 | 0.2907 | -62.0150  |
| s_Dorea_formicigenerans | LargeArteryStroke   | Inverse variance weighted | 16 | 1.0251 | 0.9125 | 1.1516 | 0.6762 | 0.0200  | 0.0293 | 0.5066 | 16.3806 | 0.2907 | -62.0150  |
| s_Dorea_formicigenerans | LargeArteryStroke   | Simple mode               | 16 | 0.9493 | 0.7015 | 1.2847 | 0.7409 | 0.0200  | 0.0293 | 0.5066 | 16.3806 | 0.2907 | -62.0150  |
| s_Dorea_formicigenerans | LargeArteryStroke   | Weighted mode             | 16 | 0.9423 | 0.7513 | 1.1819 | 0.6147 | 0.0200  | 0.0293 | 0.5066 | 16.3806 | 0.2907 | -62.0150  |
| s_Dorea_formicigenerans | SmallVesselStroke   | MR Egger                  | 16 | 1.0755 | 0.9454 | 1.2235 | 0.2872 | -0.0043 | 0.0150 | 0.7775 | 8.7074  | 0.8493 | -281.1335 |
| s_Dorea_formicigenerans | SmallVesselStroke   | Weighted median           | 16 | 1.0611 | 0.9771 | 1.1523 | 0.1584 | -0.0043 | 0.0150 | 0.7775 | 8.7074  | 0.8493 | -281.1335 |
| s_Dorea_formicigenerans | SmallVesselStroke   | Inverse variance weighted | 16 | 1.0577 | 0.9954 | 1.1238 | 0.0702 | -0.0043 | 0.0150 | 0.7775 | 8.7074  | 0.8493 | -281.1335 |
| s_Dorea_formicigenerans | SmallVesselStroke   | Simple mode               | 16 | 1.1377 | 1.0023 | 1.2914 | 0.0644 | -0.0043 | 0.0150 | 0.7775 | 8.7074  | 0.8493 | -281.1335 |
| s_Dorea_formicigenerans | SmallVesselStroke   | Weighted mode             | 16 | 1.0874 | 0.9706 | 1.2182 | 0.1688 | -0.0043 | 0.0150 | 0.7775 | 8.7074  | 0.8493 | -281.1335 |
| s_Dorea_formicigenerans | Stroke              | MR Egger                  | 18 | 0.9819 | 0.9199 | 1.0481 | 0.5912 | 0.0057  | 0.0074 | 0.4520 | 13.7598 | 0.6166 | -540.9294 |
| s_Dorea_formicigenerans | Stroke              | Weighted median           | 18 | 1.0063 | 0.9623 | 1.0522 | 0.7843 | 0.0057  | 0.0074 | 0.4520 | 13.7598 | 0.6166 | -540.9294 |
| s_Dorea_formicigenerans | Stroke              | Inverse variance weighted | 18 | 1.0046 | 0.9753 | 1.0349 | 0.7607 | 0.0057  | 0.0074 | 0.4520 | 13.7598 | 0.6166 | -540.9294 |
| s_Dorea_formicigenerans | Stroke              | Simple mode               | 18 | 1.0032 | 0.9328 | 1.0789 | 0.9327 | 0.0057  | 0.0074 | 0.4520 | 13.7598 | 0.6166 | -540.9294 |
| s_Dorea_formicigenerans | Stroke              | Weighted mode             | 18 | 1.0177 | 0.9549 | 1.0846 | 0.5973 | 0.0057  | 0.0074 | 0.4520 | 13.7598 | 0.6166 | -540.9294 |
| s_Dorea_longicatena     | CardioEmbolicStroke | MR Egger                  | 16 | 0.9921 | 0.7052 | 1.3958 | 0.9644 | -0.0035 | 0.0420 | 0.9347 | 10.2746 | 0.7418 | -335.5782 |
| s_Dorea_longicatena     | CardioEmbolicStroke | Weighted median           | 16 | 0.9823 | 0.8238 | 1.1713 | 0.8421 | -0.0035 | 0.0420 | 0.9347 | 10.2746 | 0.7418 | -335.5782 |
| s_Dorea_longicatena     | CardioEmbolicStroke | Inverse variance weighted | 16 | 0.9789 | 0.8606 | 1.1133 | 0.7449 | -0.0035 | 0.0420 | 0.9347 | 10.2746 | 0.7418 | -335.5782 |
| s_Dorea_longicatena     | CardioEmbolicStroke | Simple mode               | 16 | 0.9166 | 0.6851 | 1.2263 | 0.5663 | -0.0035 | 0.0420 | 0.9347 | 10.2746 | 0.7418 | -335.5782 |
| s_Dorea_longicatena     | CardioEmbolicStroke | Weighted mode             | 16 | 0.9888 | 0.7664 | 1.2759 | 0.9323 | -0.0035 | 0.0420 | 0.9347 | 10.2746 | 0.7418 | -335.5782 |
| s_Dorea_longicatena     | IschemicStroke      | MR Egger                  | 19 | 1.0490 | 0.9552 | 1.1519 | 0.3308 | -0.0143 | 0.0120 | 0.2475 | 32.6261 | 0.0185 | -206.6017 |
| s_Dorea_longicatena     | IschemicStroke      | Weighted median           | 19 | 0.9830 | 0.9431 | 1.0247 | 0.4195 | -0.0143 | 0.0120 | 0.2475 | 32.6261 | 0.0185 | -206.6017 |
| s_Dorea_longicatena     | IschemicStroke      | Inverse variance weighted | 19 | 0.9954 | 0.9584 | 1.0338 | 0.8108 | -0.0143 | 0.0120 | 0.2475 | 32.6261 | 0.0185 | -206.6017 |

|                          |                     |                           |    |        |        |        |        |         |        |        |         |        |           |
|--------------------------|---------------------|---------------------------|----|--------|--------|--------|--------|---------|--------|--------|---------|--------|-----------|
| s_Dorea_longicatena      | IschemicStroke      | Simple mode               | 19 | 0.9518 | 0.8818 | 1.0273 | 0.2205 | -0.0143 | 0.0120 | 0.2475 | 32.6261 | 0.0185 | -206.6017 |
| s_Dorea_longicatena      | IschemicStroke      | Weighted mode             | 19 | 0.9920 | 0.9302 | 1.0579 | 0.8102 | -0.0143 | 0.0120 | 0.2475 | 32.6261 | 0.0185 | -206.6017 |
| s_Dorea_longicatena      | LargeArteryStroke   | MR Egger                  | 16 | 1.0666 | 0.8287 | 1.3728 | 0.6244 | -0.0203 | 0.0312 | 0.5257 | 10.3016 | 0.7398 | -402.3803 |
| s_Dorea_longicatena      | LargeArteryStroke   | Weighted median           | 16 | 1.0245 | 0.8978 | 1.1691 | 0.7192 | -0.0203 | 0.0312 | 0.5257 | 10.3016 | 0.7398 | -402.3803 |
| s_Dorea_longicatena      | LargeArteryStroke   | Inverse variance weighted | 16 | 0.9870 | 0.8968 | 1.0864 | 0.7899 | -0.0203 | 0.0312 | 0.5257 | 10.3016 | 0.7398 | -402.3803 |
| s_Dorea_longicatena      | LargeArteryStroke   | Simple mode               | 16 | 1.0220 | 0.8306 | 1.2574 | 0.8398 | -0.0203 | 0.0312 | 0.5257 | 10.3016 | 0.7398 | -402.3803 |
| s_Dorea_longicatena      | LargeArteryStroke   | Weighted mode             | 16 | 1.0357 | 0.8534 | 1.2570 | 0.7273 | -0.0203 | 0.0312 | 0.5257 | 10.3016 | 0.7398 | -402.3803 |
| s_Dorea_longicatena      | SmallVesselStroke   | MR Egger                  | 16 | 1.0732 | 0.9275 | 1.2418 | 0.3589 | -0.0188 | 0.0180 | 0.3150 | 16.2852 | 0.3634 | -893.7603 |
| s_Dorea_longicatena      | SmallVesselStroke   | Weighted median           | 16 | 0.9754 | 0.9033 | 1.0533 | 0.5251 | -0.0188 | 0.0180 | 0.3150 | 16.2852 | 0.3634 | -893.7603 |
| s_Dorea_longicatena      | SmallVesselStroke   | Inverse variance weighted | 16 | 0.9988 | 0.9449 | 1.0559 | 0.9673 | -0.0188 | 0.0180 | 0.3150 | 16.2852 | 0.3634 | -893.7603 |
| s_Dorea_longicatena      | SmallVesselStroke   | Simple mode               | 16 | 0.9257 | 0.8049 | 1.0645 | 0.2957 | -0.0188 | 0.0180 | 0.3150 | 16.2852 | 0.3634 | -893.7603 |
| s_Dorea_longicatena      | SmallVesselStroke   | Weighted mode             | 16 | 0.9579 | 0.8565 | 1.0713 | 0.4626 | -0.0188 | 0.0180 | 0.3150 | 16.2852 | 0.3634 | -893.7603 |
| s_Dorea_longicatena      | Stroke              | MR Egger                  | 20 | 1.0392 | 0.9575 | 1.1279 | 0.3696 | -0.0098 | 0.0103 | 0.3532 | 32.0423 | 0.0309 | -265.5480 |
| s_Dorea_longicatena      | Stroke              | Weighted median           | 20 | 0.9995 | 0.9644 | 1.0359 | 0.9788 | -0.0098 | 0.0103 | 0.3532 | 32.0423 | 0.0309 | -265.5480 |
| s_Dorea_longicatena      | Stroke              | Inverse variance weighted | 20 | 1.0017 | 0.9707 | 1.0336 | 0.9164 | -0.0098 | 0.0103 | 0.3532 | 32.0423 | 0.0309 | -265.5480 |
| s_Dorea_longicatena      | Stroke              | Simple mode               | 20 | 0.9644 | 0.9009 | 1.0323 | 0.3092 | -0.0098 | 0.0103 | 0.3532 | 32.0423 | 0.0309 | -265.5480 |
| s_Dorea_longicatena      | Stroke              | Weighted mode             | 20 | 1.0081 | 0.9506 | 1.0690 | 0.7915 | -0.0098 | 0.0103 | 0.3532 | 32.0423 | 0.0309 | -265.5480 |
| s_Eggerthella_lenta      | CardioEmbolicStroke | MR Egger                  | 8  | 1.1560 | 0.8650 | 1.5450 | 0.3649 | -0.0548 | 0.0614 | 0.4062 | 3.6370  | 0.8205 | -330.8910 |
| s_Eggerthella_lenta      | CardioEmbolicStroke | Weighted median           | 8  | 1.0312 | 0.9077 | 1.1715 | 0.6368 | -0.0548 | 0.0614 | 0.4062 | 3.6370  | 0.8205 | -330.8910 |
| s_Eggerthella_lenta      | CardioEmbolicStroke | Inverse variance weighted | 8  | 1.0215 | 0.9227 | 1.1309 | 0.6821 | -0.0548 | 0.0614 | 0.4062 | 3.6370  | 0.8205 | -330.8910 |
| s_Eggerthella_lenta      | CardioEmbolicStroke | Simple mode               | 8  | 0.9435 | 0.7736 | 1.1507 | 0.5841 | -0.0548 | 0.0614 | 0.4062 | 3.6370  | 0.8205 | -330.8910 |
| s_Eggerthella_lenta      | CardioEmbolicStroke | Weighted mode             | 8  | 1.0632 | 0.8803 | 1.2840 | 0.5447 | -0.0548 | 0.0614 | 0.4062 | 3.6370  | 0.8205 | -330.8910 |
| s_Eggerthella_lenta      | IschemicStroke      | MR Egger                  | 15 | 1.0372 | 0.9947 | 1.0815 | 0.1111 | -0.0110 | 0.0105 | 0.3151 | 11.6399 | 0.6352 | -53.7253  |
| s_Eggerthella_lenta      | IschemicStroke      | Weighted median           | 15 | 1.0124 | 0.9864 | 1.0391 | 0.3522 | -0.0110 | 0.0105 | 0.3151 | 11.6399 | 0.6352 | -53.7253  |
| s_Eggerthella_lenta      | IschemicStroke      | Inverse variance weighted | 15 | 1.0167 | 0.9978 | 1.0359 | 0.0836 | -0.0110 | 0.0105 | 0.3151 | 11.6399 | 0.6352 | -53.7253  |
| s_Eggerthella_lenta      | IschemicStroke      | Simple mode               | 15 | 1.0273 | 0.9814 | 1.0755 | 0.2672 | -0.0110 | 0.0105 | 0.3151 | 11.6399 | 0.6352 | -53.7253  |
| s_Eggerthella_lenta      | IschemicStroke      | Weighted mode             | 15 | 1.0160 | 0.9821 | 1.0511 | 0.3737 | -0.0110 | 0.0105 | 0.3151 | 11.6399 | 0.6352 | -53.7253  |
| s_Eggerthella_lenta      | LargeArteryStroke   | MR Egger                  | 11 | 1.0660 | 0.8910 | 1.2755 | 0.5025 | -0.0170 | 0.0422 | 0.6969 | 11.4722 | 0.2447 | -24.4867  |
| s_Eggerthella_lenta      | LargeArteryStroke   | Weighted median           | 11 | 1.0341 | 0.9407 | 1.1369 | 0.4874 | -0.0170 | 0.0422 | 0.6969 | 11.4722 | 0.2447 | -24.4867  |
| s_Eggerthella_lenta      | LargeArteryStroke   | Inverse variance weighted | 11 | 1.0309 | 0.9597 | 1.1075 | 0.4041 | -0.0170 | 0.0422 | 0.6969 | 11.4722 | 0.2447 | -24.4867  |
| s_Eggerthella_lenta      | LargeArteryStroke   | Simple mode               | 11 | 1.0187 | 0.8969 | 1.1569 | 0.7816 | -0.0170 | 0.0422 | 0.6969 | 11.4722 | 0.2447 | -24.4867  |
| s_Eggerthella_lenta      | LargeArteryStroke   | Weighted mode             | 11 | 1.0335 | 0.9180 | 1.1636 | 0.5975 | -0.0170 | 0.0422 | 0.6969 | 11.4722 | 0.2447 | -24.4867  |
| s_Eggerthella_lenta      | SmallVesselStroke   | MR Egger                  | 13 | 1.0066 | 0.9310 | 1.0883 | 0.8719 | 0.0005  | 0.0193 | 0.9798 | 8.0502  | 0.7088 | -70.2730  |
| s_Eggerthella_lenta      | SmallVesselStroke   | Weighted median           | 13 | 1.0119 | 0.9659 | 1.0602 | 0.6171 | 0.0005  | 0.0193 | 0.9798 | 8.0502  | 0.7088 | -70.2730  |
| s_Eggerthella_lenta      | SmallVesselStroke   | Inverse variance weighted | 13 | 1.0075 | 0.9732 | 1.0431 | 0.6719 | 0.0005  | 0.0193 | 0.9798 | 8.0502  | 0.7088 | -70.2730  |
| s_Eggerthella_lenta      | SmallVesselStroke   | Simple mode               | 13 | 1.0042 | 0.9343 | 1.0794 | 0.9104 | 0.0005  | 0.0193 | 0.9798 | 8.0502  | 0.7088 | -70.2730  |
| s_Eggerthella_lenta      | SmallVesselStroke   | Weighted mode             | 13 | 1.0117 | 0.9518 | 1.0754 | 0.7149 | 0.0005  | 0.0193 | 0.9798 | 8.0502  | 0.7088 | -70.2730  |
| s_Eggerthella_lenta      | Stroke              | MR Egger                  | 15 | 1.0393 | 1.0018 | 1.0781 | 0.0605 | -0.0123 | 0.0091 | 0.2014 | 9.6807  | 0.7851 | -66.7074  |
| s_Eggerthella_lenta      | Stroke              | Weighted median           | 15 | 1.0128 | 0.9902 | 1.0358 | 0.2690 | -0.0123 | 0.0091 | 0.2014 | 9.6807  | 0.7851 | -66.7074  |
| s_Eggerthella_lenta      | Stroke              | Inverse variance weighted | 15 | 1.0161 | 0.9996 | 1.0328 | 0.0560 | -0.0123 | 0.0091 | 0.2014 | 9.6807  | 0.7851 | -66.7074  |
| s_Eggerthella_lenta      | Stroke              | Simple mode               | 15 | 1.0188 | 0.9803 | 1.0588 | 0.3588 | -0.0123 | 0.0091 | 0.2014 | 9.6807  | 0.7851 | -66.7074  |
| s_Eggerthella_lenta      | Stroke              | Weighted mode             | 15 | 1.0136 | 0.9791 | 1.0494 | 0.4577 | -0.0123 | 0.0091 | 0.2014 | 9.6807  | 0.7851 | -66.7074  |
| s_Enterobacter_aerogenes | CardioEmbolicStroke | MR Egger                  | 9  | 1.0040 | 0.8542 | 1.1801 | 0.9624 | 0.0280  | 0.0555 | 0.6293 | 3.7272  | 0.8106 | -35.5846  |
| s_Enterobacter_aerogenes | CardioEmbolicStroke | Weighted median           | 9  | 1.0203 | 0.9252 | 1.1252 | 0.6873 | 0.0280  | 0.0555 | 0.6293 | 3.7272  | 0.8106 | -35.5846  |
| s_Enterobacter_aerogenes | CardioEmbolicStroke | Inverse variance weighted | 9  | 1.0419 | 0.9679 | 1.1216 | 0.2749 | 0.0280  | 0.0555 | 0.6293 | 3.7272  | 0.8106 | -35.5846  |
| s_Enterobacter_aerogenes | CardioEmbolicStroke | Simple mode               | 9  | 1.0131 | 0.8846 | 1.1603 | 0.8552 | 0.0280  | 0.0555 | 0.6293 | 3.7272  | 0.8106 | -35.5846  |
| s_Enterobacter_aerogenes | CardioEmbolicStroke | Weighted mode             | 9  | 1.0173 | 0.8980 | 1.1523 | 0.7948 | 0.0280  | 0.0555 | 0.6293 | 3.7272  | 0.8106 | -35.5846  |
| s_Enterobacter_aerogenes | IschemicStroke      | MR Egger                  | 13 | 1.0029 | 0.9724 | 1.0344 | 0.8564 | -0.0063 | 0.0116 | 0.6015 | 10.7784 | 0.4620 | -32.6618  |
| s_Enterobacter_aerogenes | IschemicStroke      | Weighted median           | 13 | 0.9898 | 0.9694 | 1.0107 | 0.3353 | -0.0063 | 0.0116 | 0.6015 | 10.7784 | 0.4620 | -32.6618  |
| s_Enterobacter_aerogenes | IschemicStroke      | Inverse variance weighted | 13 | 0.9955 | 0.9807 | 1.0106 | 0.5580 | -0.0063 | 0.0116 | 0.6015 | 10.7784 | 0.4620 | -32.6618  |
| s_Enterobacter_aerogenes | IschemicStroke      | Simple mode               | 13 | 1.0133 | 0.9731 | 1.0551 | 0.5353 | -0.0063 | 0.0116 | 0.6015 | 10.7784 | 0.4620 | -32.6618  |
| s_Enterobacter_aerogenes | IschemicStroke      | Weighted mode             | 13 | 0.9781 | 0.9475 | 1.0098 | 0.1981 | -0.0063 | 0.0116 | 0.6015 | 10.7784 | 0.4620 | -32.6618  |
| s_Enterobacter_aerogenes | LargeArteryStroke   | MR Egger                  | 9  | 0.9422 | 0.8348 | 1.0633 | 0.3666 | 0.0417  | 0.0415 | 0.3491 | 5.1923  | 0.7368 | -31.1768  |

|                          |                     |                           |    |        |        |        |        |         |        |        |         |        |           |
|--------------------------|---------------------|---------------------------|----|--------|--------|--------|--------|---------|--------|--------|---------|--------|-----------|
| s_Enterobacter_aerogenes | LargeArteryStroke   | Weighted median           | 9  | 0.9703 | 0.9020 | 1.0437 | 0.4172 | 0.0417  | 0.0415 | 0.3491 | 5.1923  | 0.7368 | -31.1768  |
| s_Enterobacter_aerogenes | LargeArteryStroke   | Inverse variance weighted | 9  | 0.9956 | 0.9423 | 1.0519 | 0.8751 | 0.0417  | 0.0415 | 0.3491 | 5.1923  | 0.7368 | -31.1768  |
| s_Enterobacter_aerogenes | LargeArteryStroke   | Simple mode               | 9  | 0.9733 | 0.8653 | 1.0948 | 0.6642 | 0.0417  | 0.0415 | 0.3491 | 5.1923  | 0.7368 | -31.1768  |
| s_Enterobacter_aerogenes | LargeArteryStroke   | Weighted mode             | 9  | 0.9555 | 0.8739 | 1.0447 | 0.3464 | 0.0417  | 0.0415 | 0.3491 | 5.1923  | 0.7368 | -31.1768  |
| s_Enterobacter_aerogenes | SmallVesselStroke   | MR Egger                  | 10 | 0.9761 | 0.9119 | 1.0447 | 0.5043 | 0.0012  | 0.0235 | 0.9615 | 5.4969  | 0.7034 | -47.7488  |
| s_Enterobacter_aerogenes | SmallVesselStroke   | Weighted median           | 10 | 0.9772 | 0.9374 | 1.0188 | 0.2787 | 0.0012  | 0.0235 | 0.9615 | 5.4969  | 0.7034 | -47.7488  |
| s_Enterobacter_aerogenes | SmallVesselStroke   | Inverse variance weighted | 10 | 0.9776 | 0.9486 | 1.0075 | 0.1398 | 0.0012  | 0.0235 | 0.9615 | 5.4969  | 0.7034 | -47.7488  |
| s_Enterobacter_aerogenes | SmallVesselStroke   | Simple mode               | 10 | 0.9714 | 0.9153 | 1.0308 | 0.3627 | 0.0012  | 0.0235 | 0.9615 | 5.4969  | 0.7034 | -47.7488  |
| s_Enterobacter_aerogenes | SmallVesselStroke   | Weighted mode             | 10 | 0.9746 | 0.9278 | 1.0238 | 0.3324 | 0.0012  | 0.0235 | 0.9615 | 5.4969  | 0.7034 | -47.7488  |
| s_Enterobacter_aerogenes | Stroke              | MR Egger                  | 14 | 0.9950 | 0.9677 | 1.0232 | 0.7323 | -0.0024 | 0.0101 | 0.8165 | 4.9671  | 0.9591 | -65.7468  |
| s_Enterobacter_aerogenes | Stroke              | Weighted median           | 14 | 0.9886 | 0.9718 | 1.0056 | 0.1864 | -0.0024 | 0.0101 | 0.8165 | 4.9671  | 0.9591 | -65.7468  |
| s_Enterobacter_aerogenes | Stroke              | Inverse variance weighted | 14 | 0.9921 | 0.9792 | 1.0051 | 0.2307 | -0.0024 | 0.0101 | 0.8165 | 4.9671  | 0.9591 | -65.7468  |
| s_Enterobacter_aerogenes | Stroke              | Simple mode               | 14 | 0.9955 | 0.9675 | 1.0243 | 0.7604 | -0.0024 | 0.0101 | 0.8165 | 4.9671  | 0.9591 | -65.7468  |
| s_Enterobacter_aerogenes | Stroke              | Weighted mode             | 14 | 0.9818 | 0.9570 | 1.0071 | 0.1807 | -0.0024 | 0.0101 | 0.8165 | 4.9671  | 0.9591 | -65.7468  |
| s_Enterobacter_cloacae   | CardioEmbolicStroke | MR Egger                  | 10 | 0.9559 | 0.7750 | 1.1789 | 0.6843 | 0.0622  | 0.0599 | 0.3294 | 10.7823 | 0.2909 | -24.0157  |
| s_Enterobacter_cloacae   | CardioEmbolicStroke | Weighted median           | 10 | 0.9954 | 0.8901 | 1.1132 | 0.9358 | 0.0622  | 0.0599 | 0.3294 | 10.7823 | 0.2909 | -24.0157  |
| s_Enterobacter_cloacae   | CardioEmbolicStroke | Inverse variance weighted | 10 | 1.0583 | 0.9724 | 1.1518 | 0.1897 | 0.0622  | 0.0599 | 0.3294 | 10.7823 | 0.2909 | -24.0157  |
| s_Enterobacter_cloacae   | CardioEmbolicStroke | Simple mode               | 10 | 0.9781 | 0.8196 | 1.1673 | 0.8119 | 0.0622  | 0.0599 | 0.3294 | 10.7823 | 0.2909 | -24.0157  |
| s_Enterobacter_cloacae   | CardioEmbolicStroke | Weighted mode             | 10 | 0.9781 | 0.8606 | 1.1117 | 0.7428 | 0.0622  | 0.0599 | 0.3294 | 10.7823 | 0.2909 | -24.0157  |
| s_Enterobacter_cloacae   | IschemicStroke      | MR Egger                  | 16 | 0.9973 | 0.9627 | 1.0332 | 0.8841 | -0.0005 | 0.0111 | 0.9623 | 8.2012  | 0.8786 | -47.7149  |
| s_Enterobacter_cloacae   | IschemicStroke      | Weighted median           | 16 | 0.9891 | 0.9678 | 1.0110 | 0.3265 | -0.0005 | 0.0111 | 0.9623 | 8.2012  | 0.8786 | -47.7149  |
| s_Enterobacter_cloacae   | IschemicStroke      | Inverse variance weighted | 16 | 0.9966 | 0.9810 | 1.0123 | 0.6661 | -0.0005 | 0.0111 | 0.9623 | 8.2012  | 0.8786 | -47.7149  |
| s_Enterobacter_cloacae   | IschemicStroke      | Simple mode               | 16 | 0.9972 | 0.9617 | 1.0340 | 0.8825 | -0.0005 | 0.0111 | 0.9623 | 8.2012  | 0.8786 | -47.7149  |
| s_Enterobacter_cloacae   | IschemicStroke      | Weighted mode             | 16 | 0.9873 | 0.9590 | 1.0164 | 0.4024 | -0.0005 | 0.0111 | 0.9623 | 8.2012  | 0.8786 | -47.7149  |
| s_Enterobacter_cloacae   | LargeArteryStroke   | MR Egger                  | 12 | 1.0553 | 0.9169 | 1.2145 | 0.4703 | -0.0078 | 0.0407 | 0.8527 | 5.7964  | 0.8321 | -29.3799  |
| s_Enterobacter_cloacae   | LargeArteryStroke   | Weighted median           | 12 | 1.0456 | 0.9699 | 1.1273 | 0.2450 | -0.0078 | 0.0407 | 0.8527 | 5.7964  | 0.8321 | -29.3799  |
| s_Enterobacter_cloacae   | LargeArteryStroke   | Inverse variance weighted | 12 | 1.0421 | 0.9854 | 1.1021 | 0.1483 | -0.0078 | 0.0407 | 0.8527 | 5.7964  | 0.8321 | -29.3799  |
| s_Enterobacter_cloacae   | LargeArteryStroke   | Simple mode               | 12 | 1.0439 | 0.9327 | 1.1685 | 0.4702 | -0.0078 | 0.0407 | 0.8527 | 5.7964  | 0.8321 | -29.3799  |
| s_Enterobacter_cloacae   | LargeArteryStroke   | Weighted mode             | 12 | 1.0499 | 0.9626 | 1.1451 | 0.2952 | -0.0078 | 0.0407 | 0.8527 | 5.7964  | 0.8321 | -29.3799  |
| s_Enterobacter_cloacae   | SmallVesselStroke   | MR Egger                  | 13 | 1.0432 | 0.9594 | 1.1344 | 0.3434 | -0.0270 | 0.0246 | 0.2953 | 15.0647 | 0.2379 | -42.1812  |
| s_Enterobacter_cloacae   | SmallVesselStroke   | Weighted median           | 13 | 1.0012 | 0.9580 | 1.0463 | 0.9579 | -0.0270 | 0.0246 | 0.2953 | 15.0647 | 0.2379 | -42.1812  |
| s_Enterobacter_cloacae   | SmallVesselStroke   | Inverse variance weighted | 13 | 0.9993 | 0.9659 | 1.0339 | 0.9688 | -0.0270 | 0.0246 | 0.2953 | 15.0647 | 0.2379 | -42.1812  |
| s_Enterobacter_cloacae   | SmallVesselStroke   | Simple mode               | 13 | 0.9923 | 0.9253 | 1.0641 | 0.8321 | -0.0270 | 0.0246 | 0.2953 | 15.0647 | 0.2379 | -42.1812  |
| s_Enterobacter_cloacae   | SmallVesselStroke   | Weighted mode             | 13 | 0.9968 | 0.9432 | 1.0534 | 0.9119 | -0.0270 | 0.0246 | 0.2953 | 15.0647 | 0.2379 | -42.1812  |
| s_Enterobacter_cloacae   | Stroke              | MR Egger                  | 18 | 0.9980 | 0.9708 | 1.0260 | 0.8890 | 0.0003  | 0.0088 | 0.9719 | 14.2834 | 0.5776 | -37.4288  |
| s_Enterobacter_cloacae   | Stroke              | Weighted median           | 18 | 0.9903 | 0.9728 | 1.0081 | 0.2851 | 0.0003  | 0.0088 | 0.9719 | 14.2834 | 0.5776 | -37.4288  |
| s_Enterobacter_cloacae   | Stroke              | Inverse variance weighted | 18 | 0.9984 | 0.9859 | 1.0112 | 0.8105 | 0.0003  | 0.0088 | 0.9719 | 14.2834 | 0.5776 | -37.4288  |
| s_Enterobacter_cloacae   | Stroke              | Simple mode               | 18 | 1.0208 | 0.9841 | 1.0589 | 0.2854 | 0.0003  | 0.0088 | 0.9719 | 14.2834 | 0.5776 | -37.4288  |
| s_Enterobacter_cloacae   | Stroke              | Weighted mode             | 18 | 1.0201 | 0.9883 | 1.0529 | 0.2356 | 0.0003  | 0.0088 | 0.9719 | 14.2834 | 0.5776 | -37.4288  |
| s_Enterococcus_faecalis  | CardioEmbolicStroke | MR Egger                  | 12 | 0.9704 | 0.5018 | 1.8764 | 0.9306 | 0.0031  | 0.0610 | 0.9602 | 11.2453 | 0.3387 | 157.9154  |
| s_Enterococcus_faecalis  | CardioEmbolicStroke | Weighted median           | 12 | 1.0173 | 0.7948 | 1.3021 | 0.8916 | 0.0031  | 0.0610 | 0.9602 | 11.2453 | 0.3387 | 157.9154  |
| s_Enterococcus_faecalis  | CardioEmbolicStroke | Inverse variance weighted | 12 | 0.9864 | 0.8140 | 1.1954 | 0.8891 | 0.0031  | 0.0610 | 0.9602 | 11.2453 | 0.3387 | 157.9154  |
| s_Enterococcus_faecalis  | CardioEmbolicStroke | Simple mode               | 12 | 0.9927 | 0.6649 | 1.4821 | 0.9720 | 0.0031  | 0.0610 | 0.9602 | 11.2453 | 0.3387 | 157.9154  |
| s_Enterococcus_faecalis  | CardioEmbolicStroke | Weighted mode             | 12 | 0.9927 | 0.6627 | 1.4870 | 0.9722 | 0.0031  | 0.0610 | 0.9602 | 11.2453 | 0.3387 | 157.9154  |
| s_Enterococcus_faecalis  | IschemicStroke      | MR Egger                  | 20 | 0.9511 | 0.8776 | 1.0308 | 0.2376 | 0.0108  | 0.0087 | 0.2313 | 12.4020 | 0.8677 | -135.6968 |
| s_Enterococcus_faecalis  | IschemicStroke      | Weighted median           | 20 | 1.0148 | 0.9651 | 1.0671 | 0.5652 | 0.0108  | 0.0087 | 0.2313 | 12.4020 | 0.8677 | -135.6968 |
| s_Enterococcus_faecalis  | IschemicStroke      | Inverse variance weighted | 20 | 0.9952 | 0.9595 | 1.0322 | 0.7950 | 0.0108  | 0.0087 | 0.2313 | 12.4020 | 0.8677 | -135.6968 |
| s_Enterococcus_faecalis  | IschemicStroke      | Simple mode               | 20 | 1.0311 | 0.9448 | 1.1252 | 0.5004 | 0.0108  | 0.0087 | 0.2313 | 12.4020 | 0.8677 | -135.6968 |
| s_Enterococcus_faecalis  | IschemicStroke      | Weighted mode             | 20 | 1.0311 | 0.9525 | 1.1161 | 0.4582 | 0.0108  | 0.0087 | 0.2313 | 12.4020 | 0.8677 | -135.6968 |
| s_Enterococcus_faecalis  | LargeArteryStroke   | MR Egger                  | 13 | 1.1730 | 0.7087 | 1.9415 | 0.5475 | -0.0256 | 0.0478 | 0.6030 | 15.4773 | 0.1617 | 221.3145  |
| s_Enterococcus_faecalis  | LargeArteryStroke   | Weighted median           | 13 | 1.0338 | 0.8476 | 1.2610 | 0.7427 | -0.0256 | 0.0478 | 0.6030 | 15.4773 | 0.1617 | 221.3145  |
| s_Enterococcus_faecalis  | LargeArteryStroke   | Inverse variance weighted | 13 | 1.0298 | 0.8788 | 1.2066 | 0.7168 | -0.0256 | 0.0478 | 0.6030 | 15.4773 | 0.1617 | 221.3145  |
| s_Enterococcus_faecalis  | LargeArteryStroke   | Simple mode               | 13 | 0.9671 | 0.6621 | 1.4127 | 0.8656 | -0.0256 | 0.0478 | 0.6030 | 15.4773 | 0.1617 | 221.3145  |

|                         |                     |                           |    |        |        |        |        |         |        |        |         |        |            |
|-------------------------|---------------------|---------------------------|----|--------|--------|--------|--------|---------|--------|--------|---------|--------|------------|
| s_Enterococcus_faecalis | LargeArteryStroke   | Weighted mode             | 13 | 0.9706 | 0.6574 | 1.4330 | 0.8831 | -0.0256 | 0.0478 | 0.6030 | 15.4773 | 0.1617 | 221.3145   |
| s_Enterococcus_faecalis | SmallVesselStroke   | MR Egger                  | 15 | 0.8797 | 0.7297 | 1.0605 | 0.2018 | 0.0188  | 0.0186 | 0.3310 | 8.0501  | 0.8867 | -496.5267  |
| s_Enterococcus_faecalis | SmallVesselStroke   | Weighted median           | 15 | 0.9443 | 0.8588 | 1.0383 | 0.2369 | 0.0188  | 0.0186 | 0.3310 | 8.0501  | 0.8867 | -496.5267  |
| s_Enterococcus_faecalis | SmallVesselStroke   | Inverse variance weighted | 15 | 0.9613 | 0.8940 | 1.0337 | 0.2869 | 0.0188  | 0.0186 | 0.3310 | 8.0501  | 0.8867 | -496.5267  |
| s_Enterococcus_faecalis | SmallVesselStroke   | Simple mode               | 15 | 0.9383 | 0.8080 | 1.0897 | 0.4180 | 0.0188  | 0.0186 | 0.3310 | 8.0501  | 0.8867 | -496.5267  |
| s_Enterococcus_faecalis | SmallVesselStroke   | Weighted mode             | 15 | 0.9396 | 0.8177 | 1.0795 | 0.3937 | 0.0188  | 0.0186 | 0.3310 | 8.0501  | 0.8867 | -496.5267  |
| s_Enterococcus_faecalis | Stroke              | MR Egger                  | 21 | 0.9720 | 0.9027 | 1.0466 | 0.4604 | 0.0086  | 0.0079 | 0.2902 | 10.8474 | 0.9501 | -230.3770  |
| s_Enterococcus_faecalis | Stroke              | Weighted median           | 21 | 1.0165 | 0.9737 | 1.0612 | 0.4554 | 0.0086  | 0.0079 | 0.2902 | 10.8474 | 0.9501 | -230.3770  |
| s_Enterococcus_faecalis | Stroke              | Inverse variance weighted | 21 | 1.0087 | 0.9774 | 1.0411 | 0.5886 | 0.0086  | 0.0079 | 0.2902 | 10.8474 | 0.9501 | -230.3770  |
| s_Enterococcus_faecalis | Stroke              | Simple mode               | 21 | 1.0270 | 0.9576 | 1.1015 | 0.4636 | 0.0086  | 0.0079 | 0.2902 | 10.8474 | 0.9501 | -230.3770  |
| s_Enterococcus_faecalis | Stroke              | Weighted mode             | 21 | 1.0219 | 0.9508 | 1.0984 | 0.5626 | 0.0086  | 0.0079 | 0.2902 | 10.8474 | 0.9501 | -230.3770  |
| s_Enterococcus_faecium  | CardioEmbolicStroke | MR Egger                  | 13 | 0.6971 | 0.3116 | 1.5596 | 0.3986 | 0.0579  | 0.0811 | 0.4901 | 21.4696 | 0.0288 | 320.2393   |
| s_Enterococcus_faecium  | CardioEmbolicStroke | Weighted median           | 13 | 0.9876 | 0.7555 | 1.2911 | 0.9274 | 0.0579  | 0.0811 | 0.4901 | 21.4696 | 0.0288 | 320.2393   |
| s_Enterococcus_faecium  | CardioEmbolicStroke | Inverse variance weighted | 13 | 0.9199 | 0.7113 | 1.1896 | 0.5243 | 0.0579  | 0.0811 | 0.4901 | 21.4696 | 0.0288 | 320.2393   |
| s_Enterococcus_faecium  | CardioEmbolicStroke | Simple mode               | 13 | 1.0735 | 0.6990 | 1.6487 | 0.7515 | 0.0579  | 0.0811 | 0.4901 | 21.4696 | 0.0288 | 320.2393   |
| s_Enterococcus_faecium  | CardioEmbolicStroke | Weighted mode             | 13 | 1.0458 | 0.6933 | 1.5774 | 0.8345 | 0.0579  | 0.0811 | 0.4901 | 21.4696 | 0.0288 | 320.2393   |
| s_Enterococcus_faecium  | IschemicStroke      | MR Egger                  | 24 | 1.0056 | 0.9590 | 1.0545 | 0.8183 | -0.0033 | 0.0069 | 0.6367 | 13.6630 | 0.9130 | -46.6646   |
| s_Enterococcus_faecium  | IschemicStroke      | Weighted median           | 24 | 1.0035 | 0.9634 | 1.0454 | 0.8650 | -0.0033 | 0.0069 | 0.6367 | 13.6630 | 0.9130 | -46.6646   |
| s_Enterococcus_faecium  | IschemicStroke      | Inverse variance weighted | 24 | 0.9964 | 0.9683 | 1.0252 | 0.8027 | -0.0033 | 0.0069 | 0.6367 | 13.6630 | 0.9130 | -46.6646   |
| s_Enterococcus_faecium  | IschemicStroke      | Simple mode               | 24 | 0.9794 | 0.9222 | 1.0401 | 0.5041 | -0.0033 | 0.0069 | 0.6367 | 13.6630 | 0.9130 | -46.6646   |
| s_Enterococcus_faecium  | IschemicStroke      | Weighted mode             | 24 | 1.0023 | 0.9593 | 1.0472 | 0.9204 | -0.0033 | 0.0069 | 0.6367 | 13.6630 | 0.9130 | -46.6646   |
| s_Enterococcus_faecium  | LargeArteryStroke   | MR Egger                  | 14 | 0.7802 | 0.5211 | 1.1681 | 0.2513 | 0.0356  | 0.0415 | 0.4081 | 11.5758 | 0.4803 | 55644.4297 |
| s_Enterococcus_faecium  | LargeArteryStroke   | Weighted median           | 14 | 0.9076 | 0.7490 | 1.0999 | 0.3228 | 0.0356  | 0.0415 | 0.4081 | 11.5758 | 0.4803 | 55644.4297 |
| s_Enterococcus_faecium  | LargeArteryStroke   | Inverse variance weighted | 14 | 0.9211 | 0.8029 | 1.0566 | 0.2405 | 0.0356  | 0.0415 | 0.4081 | 11.5758 | 0.4803 | 55644.4297 |
| s_Enterococcus_faecium  | LargeArteryStroke   | Simple mode               | 14 | 0.8200 | 0.5813 | 1.1568 | 0.2788 | 0.0356  | 0.0415 | 0.4081 | 11.5758 | 0.4803 | 55644.4297 |
| s_Enterococcus_faecium  | LargeArteryStroke   | Weighted mode             | 14 | 0.8282 | 0.5913 | 1.1601 | 0.2929 | 0.0356  | 0.0415 | 0.4081 | 11.5758 | 0.4803 | 55644.4297 |
| s_Enterococcus_faecium  | SmallVesselStroke   | MR Egger                  | 16 | 0.9775 | 0.8229 | 1.1610 | 0.7990 | 0.0064  | 0.0189 | 0.7389 | 9.4071  | 0.8041 | -418.3602  |
| s_Enterococcus_faecium  | SmallVesselStroke   | Weighted median           | 16 | 1.0285 | 0.9374 | 1.1286 | 0.5525 | 0.0064  | 0.0189 | 0.7389 | 9.4071  | 0.8041 | -418.3602  |
| s_Enterococcus_faecium  | SmallVesselStroke   | Inverse variance weighted | 16 | 1.0044 | 0.9356 | 1.0783 | 0.9032 | 0.0064  | 0.0189 | 0.7389 | 9.4071  | 0.8041 | -418.3602  |
| s_Enterococcus_faecium  | SmallVesselStroke   | Simple mode               | 16 | 1.0441 | 0.8912 | 1.2232 | 0.6014 | 0.0064  | 0.0189 | 0.7389 | 9.4071  | 0.8041 | -418.3602  |
| s_Enterococcus_faecium  | SmallVesselStroke   | Weighted mode             | 16 | 1.0526 | 0.9190 | 1.2056 | 0.4710 | 0.0064  | 0.0189 | 0.7389 | 9.4071  | 0.8041 | -418.3602  |
| s_Enterococcus_faecium  | Stroke              | MR Egger                  | 25 | 0.9926 | 0.9346 | 1.0542 | 0.8105 | -0.0018 | 0.0074 | 0.8126 | 20.5459 | 0.6088 | -67.9110   |
| s_Enterococcus_faecium  | Stroke              | Weighted median           | 25 | 0.9713 | 0.9299 | 1.0146 | 0.1906 | -0.0018 | 0.0074 | 0.8126 | 20.5459 | 0.6088 | -67.9110   |
| s_Enterococcus_faecium  | Stroke              | Inverse variance weighted | 25 | 0.9862 | 0.9583 | 1.0148 | 0.3408 | -0.0018 | 0.0074 | 0.8126 | 20.5459 | 0.6088 | -67.9110   |
| s_Enterococcus_faecium  | Stroke              | Simple mode               | 25 | 0.9654 | 0.8998 | 1.0358 | 0.3364 | -0.0018 | 0.0074 | 0.8126 | 20.5459 | 0.6088 | -67.9110   |
| s_Enterococcus_faecium  | Stroke              | Weighted mode             | 25 | 0.9665 | 0.9050 | 1.0322 | 0.3200 | -0.0018 | 0.0074 | 0.8126 | 20.5459 | 0.6088 | -67.9110   |
| s_Escherichia_coli      | CardioEmbolicStroke | MR Egger                  | 10 | 0.7815 | 0.6229 | 0.9805 | 0.0658 | 0.0789  | 0.0498 | 0.1516 | 7.4759  | 0.5877 | -35.7104   |
| s_Escherichia_coli      | CardioEmbolicStroke | Weighted median           | 10 | 0.9574 | 0.8393 | 1.0920 | 0.5165 | 0.0789  | 0.0498 | 0.1516 | 7.4759  | 0.5877 | -35.7104   |
| s_Escherichia_coli      | CardioEmbolicStroke | Inverse variance weighted | 10 | 0.9230 | 0.8390 | 1.0155 | 0.1003 | 0.0789  | 0.0498 | 0.1516 | 7.4759  | 0.5877 | -35.7104   |
| s_Escherichia_coli      | CardioEmbolicStroke | Simple mode               | 10 | 0.9922 | 0.7861 | 1.2522 | 0.9487 | 0.0789  | 0.0498 | 0.1516 | 7.4759  | 0.5877 | -35.7104   |
| s_Escherichia_coli      | CardioEmbolicStroke | Weighted mode             | 10 | 0.8352 | 0.6698 | 1.0414 | 0.1442 | 0.0789  | 0.0498 | 0.1516 | 7.4759  | 0.5877 | -35.7104   |
| s_Escherichia_coli      | IschemicStroke      | MR Egger                  | 17 | 1.0049 | 0.9681 | 1.0432 | 0.7994 | -0.0029 | 0.0098 | 0.7742 | 17.3117 | 0.3006 | -49.3289   |
| s_Escherichia_coli      | IschemicStroke      | Weighted median           | 17 | 1.0053 | 0.9803 | 1.0310 | 0.6795 | -0.0029 | 0.0098 | 0.7742 | 17.3117 | 0.3006 | -49.3289   |
| s_Escherichia_coli      | IschemicStroke      | Inverse variance weighted | 17 | 1.0001 | 0.9824 | 1.0181 | 0.9925 | -0.0029 | 0.0098 | 0.7742 | 17.3117 | 0.3006 | -49.3289   |
| s_Escherichia_coli      | IschemicStroke      | Simple mode               | 17 | 1.0062 | 0.9606 | 1.0541 | 0.7965 | -0.0029 | 0.0098 | 0.7742 | 17.3117 | 0.3006 | -49.3289   |
| s_Escherichia_coli      | IschemicStroke      | Weighted mode             | 17 | 1.0068 | 0.9790 | 1.0354 | 0.6411 | -0.0029 | 0.0098 | 0.7742 | 17.3117 | 0.3006 | -49.3289   |
| s_Escherichia_coli      | LargeArteryStroke   | MR Egger                  | 14 | 1.0748 | 0.9539 | 1.2110 | 0.2591 | -0.0352 | 0.0303 | 0.2688 | 9.5248  | 0.7323 | -23.6504   |
| s_Escherichia_coli      | LargeArteryStroke   | Weighted median           | 14 | 1.0236 | 0.9407 | 1.1139 | 0.5876 | -0.0352 | 0.0303 | 0.2688 | 9.5248  | 0.7323 | -23.6504   |
| s_Escherichia_coli      | LargeArteryStroke   | Inverse variance weighted | 14 | 1.0106 | 0.9533 | 1.0714 | 0.7229 | -0.0352 | 0.0303 | 0.2688 | 9.5248  | 0.7323 | -23.6504   |
| s_Escherichia_coli      | LargeArteryStroke   | Simple mode               | 14 | 1.0155 | 0.8999 | 1.1460 | 0.8066 | -0.0352 | 0.0303 | 0.2688 | 9.5248  | 0.7323 | -23.6504   |
| s_Escherichia_coli      | LargeArteryStroke   | Weighted mode             | 14 | 1.0293 | 0.9347 | 1.1334 | 0.5675 | -0.0352 | 0.0303 | 0.2688 | 9.5248  | 0.7323 | -23.6504   |
| s_Escherichia_coli      | SmallVesselStroke   | MR Egger                  | 15 | 1.0109 | 0.9370 | 1.0907 | 0.7835 | 0.0080  | 0.0195 | 0.6897 | 17.4046 | 0.1815 | -30.9186   |
| s_Escherichia_coli      | SmallVesselStroke   | Weighted median           | 15 | 1.0340 | 0.9865 | 1.0838 | 0.1635 | 0.0080  | 0.0195 | 0.6897 | 17.4046 | 0.1815 | -30.9186   |

|                            |                     |                           |    |        |        |        |        |         |        |        |         |        |           |
|----------------------------|---------------------|---------------------------|----|--------|--------|--------|--------|---------|--------|--------|---------|--------|-----------|
| s_Escherichia_coli         | SmallVesselStroke   | Inverse variance weighted | 15 | 1.0250 | 0.9886 | 1.0627 | 0.1812 | 0.0080  | 0.0195 | 0.6897 | 17.4046 | 0.1815 | -30.9186  |
| s_Escherichia_coli         | SmallVesselStroke   | Simple mode               | 15 | 1.0331 | 0.9679 | 1.1026 | 0.3441 | 0.0080  | 0.0195 | 0.6897 | 17.4046 | 0.1815 | -30.9186  |
| s_Escherichia_coli         | SmallVesselStroke   | Weighted mode             | 15 | 1.0341 | 0.9841 | 1.0867 | 0.2056 | 0.0080  | 0.0195 | 0.6897 | 17.4046 | 0.1815 | -30.9186  |
| s_Escherichia_coli         | Stroke              | MR Egger                  | 17 | 1.0104 | 0.9777 | 1.0443 | 0.5468 | -0.0033 | 0.0082 | 0.6938 | 9.3927  | 0.8561 | -136.7194 |
| s_Escherichia_coli         | Stroke              | Weighted median           | 17 | 1.0042 | 0.9828 | 1.0260 | 0.7041 | -0.0033 | 0.0082 | 0.6938 | 9.3927  | 0.8561 | -136.7194 |
| s_Escherichia_coli         | Stroke              | Inverse variance weighted | 17 | 1.0044 | 0.9892 | 1.0198 | 0.5730 | -0.0033 | 0.0082 | 0.6938 | 9.3927  | 0.8561 | -136.7194 |
| s_Escherichia_coli         | Stroke              | Simple mode               | 17 | 0.9865 | 0.9516 | 1.0226 | 0.4683 | -0.0033 | 0.0082 | 0.6938 | 9.3927  | 0.8561 | -136.7194 |
| s_Escherichia_coli         | Stroke              | Weighted mode             | 17 | 0.9989 | 0.9709 | 1.0277 | 0.9403 | -0.0033 | 0.0082 | 0.6938 | 9.3927  | 0.8561 | -136.7194 |
| s_Eubacterium_biforme      | CardioEmbolicStroke | MR Egger                  | 13 | 1.2252 | 0.8117 | 1.8493 | 0.3544 | -0.0674 | 0.0718 | 0.3678 | 8.2469  | 0.6910 | -145.2395 |
| s_Eubacterium_biforme      | CardioEmbolicStroke | Weighted median           | 13 | 0.9830 | 0.8593 | 1.1245 | 0.8024 | -0.0674 | 0.0718 | 0.3678 | 8.2469  | 0.6910 | -145.2395 |
| s_Eubacterium_biforme      | CardioEmbolicStroke | Inverse variance weighted | 13 | 1.0119 | 0.9150 | 1.1189 | 0.8184 | -0.0674 | 0.0718 | 0.3678 | 8.2469  | 0.6910 | -145.2395 |
| s_Eubacterium_biforme      | CardioEmbolicStroke | Simple mode               | 13 | 0.9515 | 0.7642 | 1.1846 | 0.6645 | -0.0674 | 0.0718 | 0.3678 | 8.2469  | 0.6910 | -145.2395 |
| s_Eubacterium_biforme      | CardioEmbolicStroke | Weighted mode             | 13 | 0.9533 | 0.7596 | 1.1964 | 0.6873 | -0.0674 | 0.0718 | 0.3678 | 8.2469  | 0.6910 | -145.2395 |
| s_Eubacterium_biforme      | IschemicStroke      | MR Egger                  | 23 | 1.0041 | 0.9854 | 1.0231 | 0.6768 | -0.0048 | 0.0058 | 0.4208 | 20.5238 | 0.4883 | -31.2368  |
| s_Eubacterium_biforme      | IschemicStroke      | Weighted median           | 23 | 0.9984 | 0.9809 | 1.0162 | 0.8563 | -0.0048 | 0.0058 | 0.4208 | 20.5238 | 0.4883 | -31.2368  |
| s_Eubacterium_biforme      | IschemicStroke      | Inverse variance weighted | 23 | 0.9981 | 0.9859 | 1.0103 | 0.7569 | -0.0048 | 0.0058 | 0.4208 | 20.5238 | 0.4883 | -31.2368  |
| s_Eubacterium_biforme      | IschemicStroke      | Simple mode               | 23 | 1.0196 | 0.9885 | 1.0517 | 0.2323 | -0.0048 | 0.0058 | 0.4208 | 20.5238 | 0.4883 | -31.2368  |
| s_Eubacterium_biforme      | IschemicStroke      | Weighted mode             | 23 | 1.0002 | 0.9824 | 1.0182 | 0.9852 | -0.0048 | 0.0058 | 0.4208 | 20.5238 | 0.4883 | -31.2368  |
| s_Eubacterium_biforme      | LargeArteryStroke   | MR Egger                  | 19 | 0.9998 | 0.9287 | 1.0764 | 0.9960 | -0.0139 | 0.0222 | 0.5410 | 23.2834 | 0.1403 | -6.5450   |
| s_Eubacterium_biforme      | LargeArteryStroke   | Weighted median           | 19 | 0.9947 | 0.9372 | 1.0558 | 0.8623 | -0.0139 | 0.0222 | 0.5410 | 23.2834 | 0.1403 | -6.5450   |
| s_Eubacterium_biforme      | LargeArteryStroke   | Inverse variance weighted | 19 | 0.9822 | 0.9366 | 1.0301 | 0.4609 | -0.0139 | 0.0222 | 0.5410 | 23.2834 | 0.1403 | -6.5450   |
| s_Eubacterium_biforme      | LargeArteryStroke   | Simple mode               | 19 | 0.9559 | 0.8554 | 1.0682 | 0.4366 | -0.0139 | 0.0222 | 0.5410 | 23.2834 | 0.1403 | -6.5450   |
| s_Eubacterium_biforme      | LargeArteryStroke   | Weighted mode             | 19 | 1.0070 | 0.9490 | 1.0687 | 0.8196 | -0.0139 | 0.0222 | 0.5410 | 23.2834 | 0.1403 | -6.5450   |
| s_Eubacterium_biforme      | SmallVesselStroke   | MR Egger                  | 19 | 0.9857 | 0.9503 | 1.0225 | 0.4533 | 0.0004  | 0.0110 | 0.9737 | 18.5814 | 0.3531 | -31.6505  |
| s_Eubacterium_biforme      | SmallVesselStroke   | Weighted median           | 19 | 0.9798 | 0.9496 | 1.0109 | 0.2008 | 0.0004  | 0.0110 | 0.9737 | 18.5814 | 0.3531 | -31.6505  |
| s_Eubacterium_biforme      | SmallVesselStroke   | Inverse variance weighted | 19 | 0.9862 | 0.9634 | 1.0095 | 0.2445 | 0.0004  | 0.0110 | 0.9737 | 18.5814 | 0.3531 | -31.6505  |
| s_Eubacterium_biforme      | SmallVesselStroke   | Simple mode               | 19 | 0.9870 | 0.9372 | 1.0394 | 0.6264 | 0.0004  | 0.0110 | 0.9737 | 18.5814 | 0.3531 | -31.6505  |
| s_Eubacterium_biforme      | SmallVesselStroke   | Weighted mode             | 19 | 0.9801 | 0.9502 | 1.0109 | 0.2188 | 0.0004  | 0.0110 | 0.9737 | 18.5814 | 0.3531 | -31.6505  |
| s_Eubacterium_biforme      | Stroke              | MR Egger                  | 22 | 1.0038 | 0.9836 | 1.0244 | 0.7199 | -0.0019 | 0.0054 | 0.7236 | 19.9393 | 0.4617 | -38.5509  |
| s_Eubacterium_biforme      | Stroke              | Weighted median           | 22 | 1.0014 | 0.9827 | 1.0204 | 0.8866 | -0.0019 | 0.0054 | 0.7236 | 19.9393 | 0.4617 | -38.5509  |
| s_Eubacterium_biforme      | Stroke              | Inverse variance weighted | 22 | 1.0008 | 0.9885 | 1.0133 | 0.8959 | -0.0019 | 0.0054 | 0.7236 | 19.9393 | 0.4617 | -38.5509  |
| s_Eubacterium_biforme      | Stroke              | Simple mode               | 22 | 1.0245 | 0.9899 | 1.0604 | 0.1819 | -0.0019 | 0.0054 | 0.7236 | 19.9393 | 0.4617 | -38.5509  |
| s_Eubacterium_biforme      | Stroke              | Weighted mode             | 22 | 1.0023 | 0.9828 | 1.0221 | 0.8235 | -0.0019 | 0.0054 | 0.7236 | 19.9393 | 0.4617 | -38.5509  |
| s_Eubacterium_cylindroides | CardioEmbolicStroke | MR Egger                  | 11 | 0.6636 | 0.2026 | 2.1737 | 0.5151 | 0.0801  | 0.1032 | 0.4577 | 11.1183 | 0.2677 | 35.2723   |
| s_Eubacterium_cylindroides | CardioEmbolicStroke | Weighted median           | 11 | 1.0512 | 0.7865 | 1.4050 | 0.7360 | 0.0801  | 0.1032 | 0.4577 | 11.1183 | 0.2677 | 35.2723   |
| s_Eubacterium_cylindroides | CardioEmbolicStroke | Inverse variance weighted | 11 | 1.0512 | 0.8307 | 1.3301 | 0.6778 | 0.0801  | 0.1032 | 0.4577 | 11.1183 | 0.2677 | 35.2723   |
| s_Eubacterium_cylindroides | CardioEmbolicStroke | Simple mode               | 11 | 0.7363 | 0.4087 | 1.3268 | 0.3323 | 0.0801  | 0.1032 | 0.4577 | 11.1183 | 0.2677 | 35.2723   |
| s_Eubacterium_cylindroides | CardioEmbolicStroke | Weighted mode             | 11 | 0.7363 | 0.4095 | 1.3241 | 0.3307 | 0.0801  | 0.1032 | 0.4577 | 11.1183 | 0.2677 | 35.2723   |
| s_Eubacterium_cylindroides | IschemicStroke      | MR Egger                  | 19 | 0.9048 | 0.7945 | 1.0303 | 0.1496 | 0.0204  | 0.0130 | 0.1360 | 33.8385 | 0.0132 | -227.4268 |
| s_Eubacterium_cylindroides | IschemicStroke      | Weighted median           | 19 | 0.9764 | 0.9192 | 1.0372 | 0.4379 | 0.0204  | 0.0130 | 0.1360 | 33.8385 | 0.0132 | -227.4268 |
| s_Eubacterium_cylindroides | IschemicStroke      | Inverse variance weighted | 19 | 0.9952 | 0.9432 | 1.0500 | 0.8597 | 0.0204  | 0.0130 | 0.1360 | 33.8385 | 0.0132 | -227.4268 |
| s_Eubacterium_cylindroides | IschemicStroke      | Simple mode               | 19 | 0.9677 | 0.8689 | 1.0776 | 0.5569 | 0.0204  | 0.0130 | 0.1360 | 33.8385 | 0.0132 | -227.4268 |
| s_Eubacterium_cylindroides | IschemicStroke      | Weighted mode             | 19 | 0.9707 | 0.8803 | 1.0703 | 0.5580 | 0.0204  | 0.0130 | 0.1360 | 33.8385 | 0.0132 | -227.4268 |
| s_Eubacterium_cylindroides | LargeArteryStroke   | MR Egger                  | 13 | 0.8144 | 0.4480 | 1.4805 | 0.5147 | 0.0209  | 0.0550 | 0.7105 | 13.0339 | 0.2911 | 193.8327  |
| s_Eubacterium_cylindroides | LargeArteryStroke   | Weighted median           | 13 | 1.0354 | 0.8413 | 1.2742 | 0.7429 | 0.0209  | 0.0550 | 0.7105 | 13.0339 | 0.2911 | 193.8327  |
| s_Eubacterium_cylindroides | LargeArteryStroke   | Inverse variance weighted | 13 | 0.9107 | 0.7780 | 1.0660 | 0.2442 | 0.0209  | 0.0550 | 0.7105 | 13.0339 | 0.2911 | 193.8327  |
| s_Eubacterium_cylindroides | LargeArteryStroke   | Simple mode               | 13 | 1.1022 | 0.7354 | 1.6519 | 0.6460 | 0.0209  | 0.0550 | 0.7105 | 13.0339 | 0.2911 | 193.8327  |
| s_Eubacterium_cylindroides | LargeArteryStroke   | Weighted mode             | 13 | 1.0735 | 0.7502 | 1.5360 | 0.7049 | 0.0209  | 0.0550 | 0.7105 | 13.0339 | 0.2911 | 193.8327  |
| s_Eubacterium_cylindroides | SmallVesselStroke   | MR Egger                  | 13 | 0.8140 | 0.5551 | 1.1938 | 0.3148 | 0.0344  | 0.0352 | 0.3493 | 18.6634 | 0.0970 | 515.9282  |
| s_Eubacterium_cylindroides | SmallVesselStroke   | Weighted median           | 13 | 1.0280 | 0.9134 | 1.1569 | 0.6471 | 0.0344  | 0.0352 | 0.3493 | 18.6634 | 0.0970 | 515.9282  |
| s_Eubacterium_cylindroides | SmallVesselStroke   | Inverse variance weighted | 13 | 0.9782 | 0.8815 | 1.0856 | 0.6786 | 0.0344  | 0.0352 | 0.3493 | 18.6634 | 0.0970 | 515.9282  |
| s_Eubacterium_cylindroides | SmallVesselStroke   | Simple mode               | 13 | 1.0547 | 0.8796 | 1.2647 | 0.5761 | 0.0344  | 0.0352 | 0.3493 | 18.6634 | 0.0970 | 515.9282  |
| s_Eubacterium_cylindroides | SmallVesselStroke   | Weighted mode             | 13 | 1.0451 | 0.8701 | 1.2552 | 0.6456 | 0.0344  | 0.0352 | 0.3493 | 18.6634 | 0.0970 | 515.9282  |

|                            |                     |                           |    |        |        |        |        |         |        |        |         |        |            |
|----------------------------|---------------------|---------------------------|----|--------|--------|--------|--------|---------|--------|--------|---------|--------|------------|
| s_Eubacterium_cylindroides | Stroke              | MR Egger                  | 19 | 0.8978 | 0.7886 | 1.0220 | 0.1213 | 0.0182  | 0.0125 | 0.1627 | 28.5362 | 0.0544 | -2090.5592 |
| s_Eubacterium_cylindroides | Stroke              | Weighted median           | 19 | 0.9822 | 0.9341 | 1.0326 | 0.4813 | 0.0182  | 0.0125 | 0.1627 | 28.5362 | 0.0544 | -2090.5592 |
| s_Eubacterium_cylindroides | Stroke              | Inverse variance weighted | 19 | 0.9836 | 0.9421 | 1.0270 | 0.4536 | 0.0182  | 0.0125 | 0.1627 | 28.5362 | 0.0544 | -2090.5592 |
| s_Eubacterium_cylindroides | Stroke              | Simple mode               | 19 | 0.9460 | 0.8578 | 1.0431 | 0.2802 | 0.0182  | 0.0125 | 0.1627 | 28.5362 | 0.0544 | -2090.5592 |
| s_Eubacterium_cylindroides | Stroke              | Weighted mode             | 19 | 0.9558 | 0.8775 | 1.0412 | 0.3142 | 0.0182  | 0.0125 | 0.1627 | 28.5362 | 0.0544 | -2090.5592 |
| s_Eubacterium_dolichum     | CardioEmbolicStroke | MR Egger                  | 10 | 0.8625 | 0.4744 | 1.5682 | 0.6408 | 0.0588  | 0.0658 | 0.3973 | 4.9246  | 0.8408 | 311.7298   |
| s_Eubacterium_dolichum     | CardioEmbolicStroke | Weighted median           | 10 | 1.0892 | 0.8483 | 1.3984 | 0.5030 | 0.0588  | 0.0658 | 0.3973 | 4.9246  | 0.8408 | 311.7298   |
| s_Eubacterium_dolichum     | CardioEmbolicStroke | Inverse variance weighted | 10 | 1.1173 | 0.9254 | 1.3490 | 0.2486 | 0.0588  | 0.0658 | 0.3973 | 4.9246  | 0.8408 | 311.7298   |
| s_Eubacterium_dolichum     | CardioEmbolicStroke | Simple mode               | 10 | 1.0989 | 0.7614 | 1.5859 | 0.6266 | 0.0588  | 0.0658 | 0.3973 | 4.9246  | 0.8408 | 311.7298   |
| s_Eubacterium_dolichum     | CardioEmbolicStroke | Weighted mode             | 10 | 1.0727 | 0.7514 | 1.5313 | 0.7081 | 0.0588  | 0.0658 | 0.3973 | 4.9246  | 0.8408 | 311.7298   |
| s_Eubacterium_dolichum     | IschemicStroke      | MR Egger                  | 19 | 0.9458 | 0.8720 | 1.0259 | 0.1967 | 0.0208  | 0.0107 | 0.0688 | 15.9209 | 0.5981 | -219.5711  |
| s_Eubacterium_dolichum     | IschemicStroke      | Weighted median           | 19 | 1.0148 | 0.9651 | 1.0670 | 0.5661 | 0.0208  | 0.0107 | 0.0688 | 15.9209 | 0.5981 | -219.5711  |
| s_Eubacterium_dolichum     | IschemicStroke      | Inverse variance weighted | 19 | 1.0176 | 0.9835 | 1.0528 | 0.3154 | 0.0208  | 0.0107 | 0.0688 | 15.9209 | 0.5981 | -219.5711  |
| s_Eubacterium_dolichum     | IschemicStroke      | Simple mode               | 19 | 1.0151 | 0.9206 | 1.1193 | 0.7673 | 0.0208  | 0.0107 | 0.0688 | 15.9209 | 0.5981 | -219.5711  |
| s_Eubacterium_dolichum     | IschemicStroke      | Weighted mode             | 19 | 1.0176 | 0.9331 | 1.1097 | 0.6980 | 0.0208  | 0.0107 | 0.0688 | 15.9209 | 0.5981 | -219.5711  |
| s_Eubacterium_dolichum     | LargeArteryStroke   | MR Egger                  | 15 | 0.9278 | 0.6961 | 1.2364 | 0.6174 | -0.0073 | 0.0363 | 0.8435 | 6.0874  | 0.9429 | -128.3935  |
| s_Eubacterium_dolichum     | LargeArteryStroke   | Weighted median           | 15 | 0.9500 | 0.8140 | 1.1088 | 0.5157 | -0.0073 | 0.0363 | 0.8435 | 6.0874  | 0.9429 | -128.3935  |
| s_Eubacterium_dolichum     | LargeArteryStroke   | Inverse variance weighted | 15 | 0.9031 | 0.8033 | 1.0153 | 0.0880 | -0.0073 | 0.0363 | 0.8435 | 6.0874  | 0.9429 | -128.3935  |
| s_Eubacterium_dolichum     | LargeArteryStroke   | Simple mode               | 15 | 0.9872 | 0.7601 | 1.2823 | 0.9247 | -0.0073 | 0.0363 | 0.8435 | 6.0874  | 0.9429 | -128.3935  |
| s_Eubacterium_dolichum     | LargeArteryStroke   | Weighted mode             | 15 | 1.0027 | 0.7957 | 1.2637 | 0.9818 | -0.0073 | 0.0363 | 0.8435 | 6.0874  | 0.9429 | -128.3935  |
| s_Eubacterium_dolichum     | SmallVesselStroke   | MR Egger                  | 16 | 0.8980 | 0.7686 | 1.0492 | 0.1968 | 0.0414  | 0.0201 | 0.0584 | 18.8112 | 0.2224 | -230.9481  |
| s_Eubacterium_dolichum     | SmallVesselStroke   | Weighted median           | 16 | 1.0162 | 0.9279 | 1.1128 | 0.7295 | 0.0414  | 0.0201 | 0.0584 | 18.8112 | 0.2224 | -230.9481  |
| s_Eubacterium_dolichum     | SmallVesselStroke   | Inverse variance weighted | 16 | 1.0422 | 0.9706 | 1.1190 | 0.2553 | 0.0414  | 0.0201 | 0.0584 | 18.8112 | 0.2224 | -230.9481  |
| s_Eubacterium_dolichum     | SmallVesselStroke   | Simple mode               | 16 | 1.0133 | 0.8614 | 1.1920 | 0.8752 | 0.0414  | 0.0201 | 0.0584 | 18.8112 | 0.2224 | -230.9481  |
| s_Eubacterium_dolichum     | SmallVesselStroke   | Weighted mode             | 16 | 0.9874 | 0.8691 | 1.1218 | 0.8482 | 0.0414  | 0.0201 | 0.0584 | 18.8112 | 0.2224 | -230.9481  |
| s_Eubacterium_dolichum     | Stroke              | MR Egger                  | 21 | 0.9785 | 0.9144 | 1.0472 | 0.5380 | 0.0091  | 0.0091 | 0.3289 | 12.1307 | 0.9115 | -264.4013  |
| s_Eubacterium_dolichum     | Stroke              | Weighted median           | 21 | 0.9981 | 0.9585 | 1.0393 | 0.9264 | 0.0091  | 0.0091 | 0.3289 | 12.1307 | 0.9115 | -264.4013  |
| s_Eubacterium_dolichum     | Stroke              | Inverse variance weighted | 21 | 1.0098 | 0.9814 | 1.0390 | 0.5022 | 0.0091  | 0.0091 | 0.3289 | 12.1307 | 0.9115 | -264.4013  |
| s_Eubacterium_dolichum     | Stroke              | Simple mode               | 21 | 0.9910 | 0.9165 | 1.0716 | 0.8231 | 0.0091  | 0.0091 | 0.3289 | 12.1307 | 0.9115 | -264.4013  |
| s_Eubacterium_dolichum     | Stroke              | Weighted mode             | 21 | 0.9873 | 0.9226 | 1.0564 | 0.7143 | 0.0091  | 0.0091 | 0.3289 | 12.1307 | 0.9115 | -264.4013  |
| s_Eubacterium_eligens      | CardioEmbolicStroke | MR Egger                  | 10 | 0.9556 | 0.7906 | 1.1550 | 0.6508 | -0.0167 | 0.0652 | 0.8037 | 18.9042 | 0.0154 | -8.8468    |
| s_Eubacterium_eligens      | CardioEmbolicStroke | Weighted median           | 10 | 0.9526 | 0.8512 | 1.0661 | 0.3979 | -0.0167 | 0.0652 | 0.8037 | 18.9042 | 0.0154 | -8.8468    |
| s_Eubacterium_eligens      | CardioEmbolicStroke | Inverse variance weighted | 10 | 0.9357 | 0.8496 | 1.0306 | 0.1776 | -0.0167 | 0.0652 | 0.8037 | 18.9042 | 0.0154 | -8.8468    |
| s_Eubacterium_eligens      | CardioEmbolicStroke | Simple mode               | 10 | 0.9432 | 0.7592 | 1.1718 | 0.6103 | -0.0167 | 0.0652 | 0.8037 | 18.9042 | 0.0154 | -8.8468    |
| s_Eubacterium_eligens      | CardioEmbolicStroke | Weighted mode             | 10 | 0.9665 | 0.7962 | 1.1732 | 0.7381 | -0.0167 | 0.0652 | 0.8037 | 18.9042 | 0.0154 | -8.8468    |
| s_Eubacterium_eligens      | IschemicStroke      | MR Egger                  | 12 | 0.9907 | 0.9652 | 1.0168 | 0.4960 | 0.0055  | 0.0095 | 0.5733 | 7.4786  | 0.6796 | -73.0865   |
| s_Eubacterium_eligens      | IschemicStroke      | Weighted median           | 12 | 0.9887 | 0.9689 | 1.0089 | 0.2719 | 0.0055  | 0.0095 | 0.5733 | 7.4786  | 0.6796 | -73.0865   |
| s_Eubacterium_eligens      | IschemicStroke      | Inverse variance weighted | 12 | 0.9971 | 0.9829 | 1.0115 | 0.6889 | 0.0055  | 0.0095 | 0.5733 | 7.4786  | 0.6796 | -73.0865   |
| s_Eubacterium_eligens      | IschemicStroke      | Simple mode               | 12 | 0.9860 | 0.9507 | 1.0226 | 0.4631 | 0.0055  | 0.0095 | 0.5733 | 7.4786  | 0.6796 | -73.0865   |
| s_Eubacterium_eligens      | IschemicStroke      | Weighted mode             | 12 | 0.9829 | 0.9517 | 1.0151 | 0.3159 | 0.0055  | 0.0095 | 0.5733 | 7.4786  | 0.6796 | -73.0865   |
| s_Eubacterium_eligens      | LargeArteryStroke   | MR Egger                  | 12 | 0.9408 | 0.8365 | 1.0581 | 0.3325 | 0.0375  | 0.0427 | 0.4008 | 20.7142 | 0.0365 | -6.2245    |
| s_Eubacterium_eligens      | LargeArteryStroke   | Weighted median           | 12 | 1.0015 | 0.9263 | 1.0828 | 0.9699 | 0.0375  | 0.0427 | 0.4008 | 20.7142 | 0.0365 | -6.2245    |
| s_Eubacterium_eligens      | LargeArteryStroke   | Inverse variance weighted | 12 | 0.9831 | 0.9224 | 1.0478 | 0.5999 | 0.0375  | 0.0427 | 0.4008 | 20.7142 | 0.0365 | -6.2245    |
| s_Eubacterium_eligens      | LargeArteryStroke   | Simple mode               | 12 | 1.0780 | 0.9391 | 1.2374 | 0.3087 | 0.0375  | 0.0427 | 0.4008 | 20.7142 | 0.0365 | -6.2245    |
| s_Eubacterium_eligens      | LargeArteryStroke   | Weighted mode             | 12 | 1.0603 | 0.9448 | 1.1900 | 0.3410 | 0.0375  | 0.0427 | 0.4008 | 20.7142 | 0.0365 | -6.2245    |
| s_Eubacterium_eligens      | SmallVesselStroke   | MR Egger                  | 12 | 0.9763 | 0.9320 | 1.0228 | 0.3363 | 0.0139  | 0.0170 | 0.4342 | 7.9654  | 0.6322 | -29.3092   |
| s_Eubacterium_eligens      | SmallVesselStroke   | Weighted median           | 12 | 0.9966 | 0.9605 | 1.0342 | 0.8577 | 0.0139  | 0.0170 | 0.4342 | 7.9654  | 0.6322 | -29.3092   |
| s_Eubacterium_eligens      | SmallVesselStroke   | Inverse variance weighted | 12 | 0.9922 | 0.9671 | 1.0179 | 0.5490 | 0.0139  | 0.0170 | 0.4342 | 7.9654  | 0.6322 | -29.3092   |
| s_Eubacterium_eligens      | SmallVesselStroke   | Simple mode               | 12 | 1.0257 | 0.9579 | 1.0982 | 0.4831 | 0.0139  | 0.0170 | 0.4342 | 7.9654  | 0.6322 | -29.3092   |
| s_Eubacterium_eligens      | SmallVesselStroke   | Weighted mode             | 12 | 0.9556 | 0.8889 | 1.0273 | 0.2446 | 0.0139  | 0.0170 | 0.4342 | 7.9654  | 0.6322 | -29.3092   |
| s_Eubacterium_eligens      | Stroke              | MR Egger                  | 13 | 0.9936 | 0.9698 | 1.0179 | 0.6117 | 0.0020  | 0.0084 | 0.8192 | 9.4723  | 0.5784 | -48.4561   |
| s_Eubacterium_eligens      | Stroke              | Weighted median           | 13 | 0.9964 | 0.9777 | 1.0154 | 0.7053 | 0.0020  | 0.0084 | 0.8192 | 9.4723  | 0.5784 | -48.4561   |
| s_Eubacterium_eligens      | Stroke              | Inverse variance weighted | 13 | 0.9960 | 0.9831 | 1.0091 | 0.5455 | 0.0020  | 0.0084 | 0.8192 | 9.4723  | 0.5784 | -48.4561   |

|                       |                     |                           |    |        |        |        |        |         |        |        |         |        |            |
|-----------------------|---------------------|---------------------------|----|--------|--------|--------|--------|---------|--------|--------|---------|--------|------------|
| s_Eubacterium_eligens | Stroke              | Simple mode               | 13 | 0.9994 | 0.9692 | 1.0305 | 0.9679 | 0.0020  | 0.0084 | 0.8192 | 9.4723  | 0.5784 | -48.4561   |
| s_Eubacterium_eligens | Stroke              | Weighted mode             | 13 | 0.9979 | 0.9683 | 1.0284 | 0.8937 | 0.0020  | 0.0084 | 0.8192 | 9.4723  | 0.5784 | -48.4561   |
| s_Eubacterium_hallii  | CardioEmbolicStroke | MR Egger                  | 12 | 1.1415 | 0.7269 | 1.7925 | 0.5781 | -0.0389 | 0.0586 | 0.5218 | 11.2205 | 0.3406 | 4418.6762  |
| s_Eubacterium_hallii  | CardioEmbolicStroke | Weighted median           | 12 | 0.9658 | 0.8050 | 1.1588 | 0.7083 | -0.0389 | 0.0586 | 0.5218 | 11.2205 | 0.3406 | 4418.6762  |
| s_Eubacterium_hallii  | CardioEmbolicStroke | Inverse variance weighted | 12 | 0.9868 | 0.8638 | 1.1273 | 0.8446 | -0.0389 | 0.0586 | 0.5218 | 11.2205 | 0.3406 | 4418.6762  |
| s_Eubacterium_hallii  | CardioEmbolicStroke | Simple mode               | 12 | 0.9259 | 0.6817 | 1.2577 | 0.6321 | -0.0389 | 0.0586 | 0.5218 | 11.2205 | 0.3406 | 4418.6762  |
| s_Eubacterium_hallii  | CardioEmbolicStroke | Weighted mode             | 12 | 0.9643 | 0.7688 | 1.2094 | 0.7588 | -0.0389 | 0.0586 | 0.5218 | 11.2205 | 0.3406 | 4418.6762  |
| s_Eubacterium_hallii  | IschemicStroke      | MR Egger                  | 17 | 1.0359 | 0.9514 | 1.1279 | 0.4291 | -0.0124 | 0.0125 | 0.3374 | 33.5587 | 0.0062 | -112.2787  |
| s_Eubacterium_hallii  | IschemicStroke      | Weighted median           | 17 | 1.0161 | 0.9769 | 1.0569 | 0.4264 | -0.0124 | 0.0125 | 0.3374 | 33.5587 | 0.0062 | -112.2787  |
| s_Eubacterium_hallii  | IschemicStroke      | Inverse variance weighted | 17 | 0.9967 | 0.9601 | 1.0346 | 0.8606 | -0.0124 | 0.0125 | 0.3374 | 33.5587 | 0.0062 | -112.2787  |
| s_Eubacterium_hallii  | IschemicStroke      | Simple mode               | 17 | 1.0159 | 0.9491 | 1.0874 | 0.6561 | -0.0124 | 0.0125 | 0.3374 | 33.5587 | 0.0062 | -112.2787  |
| s_Eubacterium_hallii  | IschemicStroke      | Weighted mode             | 17 | 1.0124 | 0.9574 | 1.0706 | 0.6703 | -0.0124 | 0.0125 | 0.3374 | 33.5587 | 0.0062 | -112.2787  |
| s_Eubacterium_hallii  | LargeArteryStroke   | MR Egger                  | 15 | 1.1276 | 0.8705 | 1.4605 | 0.3796 | -0.0275 | 0.0353 | 0.4490 | 10.6814 | 0.6375 | -80.9634   |
| s_Eubacterium_hallii  | LargeArteryStroke   | Weighted median           | 15 | 0.9943 | 0.8760 | 1.1285 | 0.9292 | -0.0275 | 0.0353 | 0.4490 | 10.6814 | 0.6375 | -80.9634   |
| s_Eubacterium_hallii  | LargeArteryStroke   | Inverse variance weighted | 15 | 1.0238 | 0.9351 | 1.1210 | 0.6107 | -0.0275 | 0.0353 | 0.4490 | 10.6814 | 0.6375 | -80.9634   |
| s_Eubacterium_hallii  | LargeArteryStroke   | Simple mode               | 15 | 0.9321 | 0.7574 | 1.1470 | 0.5171 | -0.0275 | 0.0353 | 0.4490 | 10.6814 | 0.6375 | -80.9634   |
| s_Eubacterium_hallii  | LargeArteryStroke   | Weighted mode             | 15 | 0.9384 | 0.7790 | 1.1305 | 0.5145 | -0.0275 | 0.0353 | 0.4490 | 10.6814 | 0.6375 | -80.9634   |
| s_Eubacterium_hallii  | SmallVesselStroke   | MR Egger                  | 15 | 1.1177 | 0.9240 | 1.3520 | 0.2724 | -0.0333 | 0.0260 | 0.2218 | 25.8250 | 0.0272 | -237.1246  |
| s_Eubacterium_hallii  | SmallVesselStroke   | Weighted median           | 15 | 1.0259 | 0.9540 | 1.1033 | 0.4902 | -0.0333 | 0.0260 | 0.2218 | 25.8250 | 0.0272 | -237.1246  |
| s_Eubacterium_hallii  | SmallVesselStroke   | Inverse variance weighted | 15 | 0.9946 | 0.9290 | 1.0649 | 0.8764 | -0.0333 | 0.0260 | 0.2218 | 25.8250 | 0.0272 | -237.1246  |
| s_Eubacterium_hallii  | SmallVesselStroke   | Simple mode               | 15 | 1.0222 | 0.9184 | 1.1377 | 0.6941 | -0.0333 | 0.0260 | 0.2218 | 25.8250 | 0.0272 | -237.1246  |
| s_Eubacterium_hallii  | SmallVesselStroke   | Weighted mode             | 15 | 1.0154 | 0.9261 | 1.1134 | 0.7495 | -0.0333 | 0.0260 | 0.2218 | 25.8250 | 0.0272 | -237.1246  |
| s_Eubacterium_hallii  | Stroke              | MR Egger                  | 16 | 1.0502 | 0.9804 | 1.1251 | 0.1847 | -0.0113 | 0.0095 | 0.2544 | 14.1412 | 0.5148 | -324.0334  |
| s_Eubacterium_hallii  | Stroke              | Weighted median           | 16 | 1.0307 | 0.9946 | 1.0682 | 0.0967 | -0.0113 | 0.0095 | 0.2544 | 14.1412 | 0.5148 | -324.0334  |
| s_Eubacterium_hallii  | Stroke              | Inverse variance weighted | 16 | 1.0101 | 0.9855 | 1.0353 | 0.4257 | -0.0113 | 0.0095 | 0.2544 | 14.1412 | 0.5148 | -324.0334  |
| s_Eubacterium_hallii  | Stroke              | Simple mode               | 16 | 1.0283 | 0.9728 | 1.0871 | 0.3394 | -0.0113 | 0.0095 | 0.2544 | 14.1412 | 0.5148 | -324.0334  |
| s_Eubacterium_hallii  | Stroke              | Weighted mode             | 16 | 1.0338 | 0.9845 | 1.0856 | 0.2026 | -0.0113 | 0.0095 | 0.2544 | 14.1412 | 0.5148 | -324.0334  |
| s_Eubacterium_limosum | CardioEmbolicStroke | MR Egger                  | 5  | 0.2831 | 0.0394 | 2.0336 | 0.2985 | 0.2450  | 0.1987 | 0.3054 | 6.2589  | 0.1806 | 10.8772    |
| s_Eubacterium_limosum | CardioEmbolicStroke | Weighted median           | 5  | 1.0000 | 0.7250 | 1.3794 | 0.9999 | 0.2450  | 0.1987 | 0.3054 | 6.2589  | 0.1806 | 10.8772    |
| s_Eubacterium_limosum | CardioEmbolicStroke | Inverse variance weighted | 5  | 0.9641 | 0.6971 | 1.3335 | 0.8252 | 0.2450  | 0.1987 | 0.3054 | 6.2589  | 0.1806 | 10.8772    |
| s_Eubacterium_limosum | CardioEmbolicStroke | Simple mode               | 5  | 1.0075 | 0.6587 | 1.5412 | 0.9740 | 0.2450  | 0.1987 | 0.3054 | 6.2589  | 0.1806 | 10.8772    |
| s_Eubacterium_limosum | CardioEmbolicStroke | Weighted mode             | 5  | 1.0044 | 0.6963 | 1.4487 | 0.9825 | 0.2450  | 0.1987 | 0.3054 | 6.2589  | 0.1806 | 10.8772    |
| s_Eubacterium_limosum | IschemicStroke      | MR Egger                  | 12 | 1.0434 | 0.9725 | 1.1195 | 0.2638 | -0.0101 | 0.0103 | 0.3512 | 4.5596  | 0.9506 | -316.7132  |
| s_Eubacterium_limosum | IschemicStroke      | Weighted median           | 12 | 1.0036 | 0.9578 | 1.0516 | 0.8802 | -0.0101 | 0.0103 | 0.3512 | 4.5596  | 0.9506 | -316.7132  |
| s_Eubacterium_limosum | IschemicStroke      | Inverse variance weighted | 12 | 1.0124 | 0.9766 | 1.0495 | 0.5016 | -0.0101 | 0.0103 | 0.3512 | 4.5596  | 0.9506 | -316.7132  |
| s_Eubacterium_limosum | IschemicStroke      | Simple mode               | 12 | 1.0259 | 0.9541 | 1.1032 | 0.5038 | -0.0101 | 0.0103 | 0.3512 | 4.5596  | 0.9506 | -316.7132  |
| s_Eubacterium_limosum | IschemicStroke      | Weighted mode             | 12 | 1.0124 | 0.9521 | 1.0766 | 0.7014 | -0.0101 | 0.0103 | 0.3512 | 4.5596  | 0.9506 | -316.7132  |
| s_Eubacterium_limosum | LargeArteryStroke   | MR Egger                  | 8  | 1.2661 | 0.8928 | 1.7955 | 0.2337 | -0.0701 | 0.0442 | 0.1636 | 3.1809  | 0.8678 | -2068.5326 |
| s_Eubacterium_limosum | LargeArteryStroke   | Weighted median           | 8  | 0.9247 | 0.7639 | 1.1192 | 0.4213 | -0.0701 | 0.0442 | 0.1636 | 3.1809  | 0.8678 | -2068.5326 |
| s_Eubacterium_limosum | LargeArteryStroke   | Inverse variance weighted | 8  | 0.9799 | 0.8451 | 1.1364 | 0.7886 | -0.0701 | 0.0442 | 0.1636 | 3.1809  | 0.8678 | -2068.5326 |
| s_Eubacterium_limosum | LargeArteryStroke   | Simple mode               | 8  | 0.8780 | 0.6616 | 1.1653 | 0.3976 | -0.0701 | 0.0442 | 0.1636 | 3.1809  | 0.8678 | -2068.5326 |
| s_Eubacterium_limosum | LargeArteryStroke   | Weighted mode             | 8  | 0.8809 | 0.6582 | 1.1788 | 0.4218 | -0.0701 | 0.0442 | 0.1636 | 3.1809  | 0.8678 | -2068.5326 |
| s_Eubacterium_limosum | SmallVesselStroke   | MR Egger                  | 8  | 1.1345 | 0.9358 | 1.3754 | 0.2462 | -0.0303 | 0.0244 | 0.2611 | 6.0869  | 0.5296 | -4149.1386 |
| s_Eubacterium_limosum | SmallVesselStroke   | Weighted median           | 8  | 1.0393 | 0.9322 | 1.1588 | 0.4874 | -0.0303 | 0.0244 | 0.2611 | 6.0869  | 0.5296 | -4149.1386 |
| s_Eubacterium_limosum | SmallVesselStroke   | Inverse variance weighted | 8  | 1.0161 | 0.9362 | 1.1028 | 0.7027 | -0.0303 | 0.0244 | 0.2611 | 6.0869  | 0.5296 | -4149.1386 |
| s_Eubacterium_limosum | SmallVesselStroke   | Simple mode               | 8  | 1.0821 | 0.9184 | 1.2750 | 0.3770 | -0.0303 | 0.0244 | 0.2611 | 6.0869  | 0.5296 | -4149.1386 |
| s_Eubacterium_limosum | SmallVesselStroke   | Weighted mode             | 8  | 1.0576 | 0.9115 | 1.2272 | 0.4843 | -0.0303 | 0.0244 | 0.2611 | 6.0869  | 0.5296 | -4149.1386 |
| s_Eubacterium_limosum | Stroke              | MR Egger                  | 11 | 1.0874 | 1.0015 | 1.1805 | 0.0770 | -0.0185 | 0.0108 | 0.1206 | 6.0999  | 0.8068 | -767.6206  |
| s_Eubacterium_limosum | Stroke              | Weighted median           | 11 | 1.0075 | 0.9615 | 1.0557 | 0.7538 | -0.0185 | 0.0108 | 0.1206 | 6.0999  | 0.8068 | -767.6206  |
| s_Eubacterium_limosum | Stroke              | Inverse variance weighted | 11 | 1.0186 | 0.9841 | 1.0543 | 0.2940 | -0.0185 | 0.0108 | 0.1206 | 6.0999  | 0.8068 | -767.6206  |
| s_Eubacterium_limosum | Stroke              | Simple mode               | 11 | 0.9858 | 0.9181 | 1.0584 | 0.7013 | -0.0185 | 0.0108 | 0.1206 | 6.0999  | 0.8068 | -767.6206  |
| s_Eubacterium_limosum | Stroke              | Weighted mode             | 11 | 0.9948 | 0.9312 | 1.0628 | 0.8813 | -0.0185 | 0.0108 | 0.1206 | 6.0999  | 0.8068 | -767.6206  |
| s_Eubacterium_rectale | CardioEmbolicStroke | MR Egger                  | 11 | 1.2303 | 1.0082 | 1.5013 | 0.0717 | -0.0764 | 0.0342 | 0.0525 | 8.9787  | 0.5341 | -55.7554   |

|                         |                     |                           |    |        |        |        |        |         |        |        |         |        |           |
|-------------------------|---------------------|---------------------------|----|--------|--------|--------|--------|---------|--------|--------|---------|--------|-----------|
| s_Eubacterium_rectale   | CardioEmbolicStroke | Weighted median           | 11 | 0.9782 | 0.8405 | 1.1384 | 0.7753 | -0.0764 | 0.0342 | 0.0525 | 8.9787  | 0.5341 | -55.7554  |
| s_Eubacterium_rectale   | CardioEmbolicStroke | Inverse variance weighted | 11 | 1.0156 | 0.9133 | 1.1294 | 0.7747 | -0.0764 | 0.0342 | 0.0525 | 8.9787  | 0.5341 | -55.7554  |
| s_Eubacterium_rectale   | CardioEmbolicStroke | Simple mode               | 11 | 0.9085 | 0.6804 | 1.2131 | 0.5302 | -0.0764 | 0.0342 | 0.0525 | 8.9787  | 0.5341 | -55.7554  |
| s_Eubacterium_rectale   | CardioEmbolicStroke | Weighted mode             | 11 | 1.1905 | 0.9944 | 1.4252 | 0.0868 | -0.0764 | 0.0342 | 0.0525 | 8.9787  | 0.5341 | -55.7554  |
| s_Eubacterium_rectale   | IschemicStroke      | MR Egger                  | 17 | 1.0108 | 0.9632 | 1.0608 | 0.6694 | -0.0096 | 0.0096 | 0.3302 | 29.3443 | 0.0217 | -59.4676  |
| s_Eubacterium_rectale   | IschemicStroke      | Weighted median           | 17 | 0.9931 | 0.9629 | 1.0243 | 0.6597 | -0.0096 | 0.0096 | 0.3302 | 29.3443 | 0.0217 | -59.4676  |
| s_Eubacterium_rectale   | IschemicStroke      | Inverse variance weighted | 17 | 0.9905 | 0.9633 | 1.0186 | 0.5046 | -0.0096 | 0.0096 | 0.3302 | 29.3443 | 0.0217 | -59.4676  |
| s_Eubacterium_rectale   | IschemicStroke      | Simple mode               | 17 | 0.9802 | 0.9335 | 1.0292 | 0.4324 | -0.0096 | 0.0096 | 0.3302 | 29.3443 | 0.0217 | -59.4676  |
| s_Eubacterium_rectale   | IschemicStroke      | Weighted mode             | 17 | 0.9924 | 0.9595 | 1.0265 | 0.6651 | -0.0096 | 0.0096 | 0.3302 | 29.3443 | 0.0217 | -59.4676  |
| s_Eubacterium_rectale   | LargeArteryStroke   | MR Egger                  | 15 | 0.9863 | 0.8707 | 1.1171 | 0.8311 | -0.0116 | 0.0236 | 0.6333 | 11.3767 | 0.5793 | -35.1781  |
| s_Eubacterium_rectale   | LargeArteryStroke   | Weighted median           | 15 | 1.0083 | 0.9096 | 1.1178 | 0.8745 | -0.0116 | 0.0236 | 0.6333 | 11.3767 | 0.5793 | -35.1781  |
| s_Eubacterium_rectale   | LargeArteryStroke   | Inverse variance weighted | 15 | 0.9612 | 0.8963 | 1.0309 | 0.2680 | -0.0116 | 0.0236 | 0.6333 | 11.3767 | 0.5793 | -35.1781  |
| s_Eubacterium_rectale   | LargeArteryStroke   | Simple mode               | 15 | 0.9907 | 0.8283 | 1.1849 | 0.9200 | -0.0116 | 0.0236 | 0.6333 | 11.3767 | 0.5793 | -35.1781  |
| s_Eubacterium_rectale   | LargeArteryStroke   | Weighted mode             | 15 | 1.0034 | 0.8919 | 1.1288 | 0.9560 | -0.0116 | 0.0236 | 0.6333 | 11.3767 | 0.5793 | -35.1781  |
| s_Eubacterium_rectale   | SmallVesselStroke   | MR Egger                  | 15 | 0.9172 | 0.8426 | 0.9983 | 0.0668 | 0.0325  | 0.0165 | 0.0700 | 27.5574 | 0.0163 | -32.6947  |
| s_Eubacterium_rectale   | SmallVesselStroke   | Weighted median           | 15 | 0.9545 | 0.9016 | 1.0105 | 0.1091 | 0.0325  | 0.0165 | 0.0700 | 27.5574 | 0.0163 | -32.6947  |
| s_Eubacterium_rectale   | SmallVesselStroke   | Inverse variance weighted | 15 | 0.9836 | 0.9326 | 1.0375 | 0.5440 | 0.0325  | 0.0165 | 0.0700 | 27.5574 | 0.0163 | -32.6947  |
| s_Eubacterium_rectale   | SmallVesselStroke   | Simple mode               | 15 | 0.9914 | 0.8862 | 1.1091 | 0.8825 | 0.0325  | 0.0165 | 0.0700 | 27.5574 | 0.0163 | -32.6947  |
| s_Eubacterium_rectale   | SmallVesselStroke   | Weighted mode             | 15 | 0.9421 | 0.8837 | 1.0043 | 0.0890 | 0.0325  | 0.0165 | 0.0700 | 27.5574 | 0.0163 | -32.6947  |
| s_Eubacterium_rectale   | Stroke              | MR Egger                  | 18 | 1.0026 | 0.9665 | 1.0400 | 0.8917 | -0.0033 | 0.0070 | 0.6400 | 20.3452 | 0.2051 | -76.0706  |
| s_Eubacterium_rectale   | Stroke              | Weighted median           | 18 | 0.9906 | 0.9641 | 1.0178 | 0.4936 | -0.0033 | 0.0070 | 0.6400 | 20.3452 | 0.2051 | -76.0706  |
| s_Eubacterium_rectale   | Stroke              | Inverse variance weighted | 18 | 0.9952 | 0.9755 | 1.0153 | 0.6385 | -0.0033 | 0.0070 | 0.6400 | 20.3452 | 0.2051 | -76.0706  |
| s_Eubacterium_rectale   | Stroke              | Simple mode               | 18 | 1.0062 | 0.9610 | 1.0535 | 0.7951 | -0.0033 | 0.0070 | 0.6400 | 20.3452 | 0.2051 | -76.0706  |
| s_Eubacterium_rectale   | Stroke              | Weighted mode             | 18 | 0.9929 | 0.9644 | 1.0223 | 0.6394 | -0.0033 | 0.0070 | 0.6400 | 20.3452 | 0.2051 | -76.0706  |
| s_Eubacterium_saburreum | CardioEmbolicStroke | MR Egger                  | 10 | 0.9703 | 0.6460 | 1.4572 | 0.8879 | 0.0175  | 0.0685 | 0.8042 | 7.4987  | 0.4839 | -213.1049 |
| s_Eubacterium_saburreum | CardioEmbolicStroke | Weighted median           | 10 | 1.0438 | 0.8694 | 1.2533 | 0.6459 | 0.0175  | 0.0685 | 0.8042 | 7.4987  | 0.4839 | -213.1049 |
| s_Eubacterium_saburreum | CardioEmbolicStroke | Inverse variance weighted | 10 | 1.0202 | 0.8918 | 1.1671 | 0.7710 | 0.0175  | 0.0685 | 0.8042 | 7.4987  | 0.4839 | -213.1049 |
| s_Eubacterium_saburreum | CardioEmbolicStroke | Simple mode               | 10 | 1.1863 | 0.8579 | 1.6404 | 0.3286 | 0.0175  | 0.0685 | 0.8042 | 7.4987  | 0.4839 | -213.1049 |
| s_Eubacterium_saburreum | CardioEmbolicStroke | Weighted mode             | 10 | 1.1916 | 0.8447 | 1.6808 | 0.3441 | 0.0175  | 0.0685 | 0.8042 | 7.4987  | 0.4839 | -213.1049 |
| s_Eubacterium_saburreum | IschemicStroke      | MR Egger                  | 21 | 0.9910 | 0.9592 | 1.0239 | 0.5951 | 0.0112  | 0.0078 | 0.1670 | 16.4059 | 0.6911 | -36.5548  |
| s_Eubacterium_saburreum | IschemicStroke      | Weighted median           | 21 | 0.9958 | 0.9685 | 1.0239 | 0.7669 | 0.0112  | 0.0078 | 0.1670 | 16.4059 | 0.6911 | -36.5548  |
| s_Eubacterium_saburreum | IschemicStroke      | Inverse variance weighted | 21 | 1.0105 | 0.9915 | 1.0299 | 0.2808 | 0.0112  | 0.0078 | 0.1670 | 16.4059 | 0.6911 | -36.5548  |
| s_Eubacterium_saburreum | IschemicStroke      | Simple mode               | 21 | 1.0272 | 0.9764 | 1.0806 | 0.3122 | 0.0112  | 0.0078 | 0.1670 | 16.4059 | 0.6911 | -36.5548  |
| s_Eubacterium_saburreum | IschemicStroke      | Weighted mode             | 21 | 0.9915 | 0.9535 | 1.0309 | 0.6708 | 0.0112  | 0.0078 | 0.1670 | 16.4059 | 0.6911 | -36.5548  |
| s_Eubacterium_saburreum | LargeArteryStroke   | MR Egger                  | 14 | 0.9028 | 0.7121 | 1.1446 | 0.4149 | 0.0410  | 0.0476 | 0.4055 | 21.5051 | 0.0435 | -11.7474  |
| s_Eubacterium_saburreum | LargeArteryStroke   | Weighted median           | 14 | 1.0552 | 0.9307 | 1.1964 | 0.4017 | 0.0410  | 0.0476 | 0.4055 | 21.5051 | 0.0435 | -11.7474  |
| s_Eubacterium_saburreum | LargeArteryStroke   | Inverse variance weighted | 14 | 0.9906 | 0.8894 | 1.1032 | 0.8631 | 0.0410  | 0.0476 | 0.4055 | 21.5051 | 0.0435 | -11.7474  |
| s_Eubacterium_saburreum | LargeArteryStroke   | Simple mode               | 14 | 1.0654 | 0.8261 | 1.3740 | 0.6337 | 0.0410  | 0.0476 | 0.4055 | 21.5051 | 0.0435 | -11.7474  |
| s_Eubacterium_saburreum | LargeArteryStroke   | Weighted mode             | 14 | 1.0972 | 0.8649 | 1.3919 | 0.4584 | 0.0410  | 0.0476 | 0.4055 | 21.5051 | 0.0435 | -11.7474  |
| s_Eubacterium_saburreum | SmallVesselStroke   | MR Egger                  | 15 | 1.0442 | 0.9237 | 1.1803 | 0.5019 | 0.0013  | 0.0253 | 0.9591 | 22.4926 | 0.0482 | -22.9307  |
| s_Eubacterium_saburreum | SmallVesselStroke   | Weighted median           | 15 | 1.0369 | 0.9706 | 1.1077 | 0.2823 | 0.0013  | 0.0253 | 0.9591 | 22.4926 | 0.0482 | -22.9307  |
| s_Eubacterium_saburreum | SmallVesselStroke   | Inverse variance weighted | 15 | 1.0472 | 0.9908 | 1.1068 | 0.1028 | 0.0013  | 0.0253 | 0.9591 | 22.4926 | 0.0482 | -22.9307  |
| s_Eubacterium_saburreum | SmallVesselStroke   | Simple mode               | 15 | 1.0394 | 0.9204 | 1.1739 | 0.5429 | 0.0013  | 0.0253 | 0.9591 | 22.4926 | 0.0482 | -22.9307  |
| s_Eubacterium_saburreum | SmallVesselStroke   | Weighted mode             | 15 | 1.0275 | 0.9297 | 1.1356 | 0.6035 | 0.0013  | 0.0253 | 0.9591 | 22.4926 | 0.0482 | -22.9307  |
| s_Eubacterium_saburreum | Stroke              | MR Egger                  | 19 | 1.0085 | 0.9711 | 1.0473 | 0.6667 | 0.0036  | 0.0078 | 0.6512 | 14.5597 | 0.6272 | -64.2542  |
| s_Eubacterium_saburreum | Stroke              | Weighted median           | 19 | 1.0218 | 0.9946 | 1.0497 | 0.1165 | 0.0036  | 0.0078 | 0.6512 | 14.5597 | 0.6272 | -64.2542  |
| s_Eubacterium_saburreum | Stroke              | Inverse variance weighted | 19 | 1.0163 | 0.9973 | 1.0356 | 0.0934 | 0.0036  | 0.0078 | 0.6512 | 14.5597 | 0.6272 | -64.2542  |
| s_Eubacterium_saburreum | Stroke              | Simple mode               | 19 | 1.0235 | 0.9725 | 1.0771 | 0.3850 | 0.0036  | 0.0078 | 0.6512 | 14.5597 | 0.6272 | -64.2542  |
| s_Eubacterium_saburreum | Stroke              | Weighted mode             | 19 | 1.0240 | 0.9753 | 1.0752 | 0.3526 | 0.0036  | 0.0078 | 0.6512 | 14.5597 | 0.6272 | -64.2542  |
| s_Eubacterium_siraeum   | CardioEmbolicStroke | MR Egger                  | 5  | 1.3109 | 0.4724 | 3.6375 | 0.6391 | -0.1189 | 0.1715 | 0.5379 | 3.5133  | 0.3190 | 904.6643  |
| s_Eubacterium_siraeum   | CardioEmbolicStroke | Weighted median           | 5  | 0.9690 | 0.7845 | 1.1967 | 0.7697 | -0.1189 | 0.1715 | 0.5379 | 3.5133  | 0.3190 | 904.6643  |
| s_Eubacterium_siraeum   | CardioEmbolicStroke | Inverse variance weighted | 5  | 0.9186 | 0.7777 | 1.0850 | 0.3177 | -0.1189 | 0.1715 | 0.5379 | 3.5133  | 0.3190 | 904.6643  |
| s_Eubacterium_siraeum   | CardioEmbolicStroke | Simple mode               | 5  | 1.0205 | 0.7312 | 1.4242 | 0.9107 | -0.1189 | 0.1715 | 0.5379 | 3.5133  | 0.3190 | 904.6643  |

|                                |                     |                           |    |        |        |        |        |         |        |        |         |        |           |
|--------------------------------|---------------------|---------------------------|----|--------|--------|--------|--------|---------|--------|--------|---------|--------|-----------|
| s_Eubacterium_siraeum          | CardioEmbolicStroke | Weighted mode             | 5  | 1.0417 | 0.7485 | 1.4496 | 0.8205 | -0.1189 | 0.1715 | 0.5379 | 3.5133  | 0.3190 | 904.6643  |
| s_Eubacterium_siraeum          | IschemicStroke      | MR Egger                  | 20 | 1.0034 | 0.9730 | 1.0348 | 0.8292 | 0.0030  | 0.0097 | 0.7618 | 14.8493 | 0.6723 | -22.5401  |
| s_Eubacterium_siraeum          | IschemicStroke      | Weighted median           | 20 | 1.0108 | 0.9849 | 1.0374 | 0.4155 | 0.0030  | 0.0097 | 0.7618 | 14.8493 | 0.6723 | -22.5401  |
| s_Eubacterium_siraeum          | IschemicStroke      | Inverse variance weighted | 20 | 1.0074 | 0.9898 | 1.0254 | 0.4099 | 0.0030  | 0.0097 | 0.7618 | 14.8493 | 0.6723 | -22.5401  |
| s_Eubacterium_siraeum          | IschemicStroke      | Simple mode               | 20 | 1.0035 | 0.9558 | 1.0536 | 0.8894 | 0.0030  | 0.0097 | 0.7618 | 14.8493 | 0.6723 | -22.5401  |
| s_Eubacterium_siraeum          | IschemicStroke      | Weighted mode             | 20 | 1.0068 | 0.9608 | 1.0550 | 0.7792 | 0.0030  | 0.0097 | 0.7618 | 14.8493 | 0.6723 | -22.5401  |
| s_Eubacterium_siraeum          | LargeArteryStroke   | MR Egger                  | 12 | 0.9443 | 0.7831 | 1.1387 | 0.5619 | 0.0009  | 0.0475 | 0.9851 | 16.5432 | 0.0851 | -6.2431   |
| s_Eubacterium_siraeum          | LargeArteryStroke   | Weighted median           | 12 | 0.9833 | 0.8772 | 1.1023 | 0.7730 | 0.0009  | 0.0475 | 0.9851 | 16.5432 | 0.0851 | -6.2431   |
| s_Eubacterium_siraeum          | LargeArteryStroke   | Inverse variance weighted | 12 | 0.9458 | 0.8629 | 1.0367 | 0.2338 | 0.0009  | 0.0475 | 0.9851 | 16.5432 | 0.0851 | -6.2431   |
| s_Eubacterium_siraeum          | LargeArteryStroke   | Simple mode               | 12 | 0.9782 | 0.8025 | 1.1924 | 0.8314 | 0.0009  | 0.0475 | 0.9851 | 16.5432 | 0.0851 | -6.2431   |
| s_Eubacterium_siraeum          | LargeArteryStroke   | Weighted mode             | 12 | 0.9828 | 0.7980 | 1.2104 | 0.8733 | 0.0009  | 0.0475 | 0.9851 | 16.5432 | 0.0851 | -6.2431   |
| s_Eubacterium_siraeum          | SmallVesselStroke   | MR Egger                  | 14 | 1.0044 | 0.9299 | 1.0849 | 0.9129 | 0.0001  | 0.0217 | 0.9978 | 16.3189 | 0.1771 | -16.5621  |
| s_Eubacterium_siraeum          | SmallVesselStroke   | Weighted median           | 14 | 1.0049 | 0.9520 | 1.0608 | 0.8591 | 0.0001  | 0.0217 | 0.9978 | 16.3189 | 0.1771 | -16.5621  |
| s_Eubacterium_siraeum          | SmallVesselStroke   | Inverse variance weighted | 14 | 1.0045 | 0.9640 | 1.0467 | 0.8310 | 0.0001  | 0.0217 | 0.9978 | 16.3189 | 0.1771 | -16.5621  |
| s_Eubacterium_siraeum          | SmallVesselStroke   | Simple mode               | 14 | 1.0273 | 0.9340 | 1.1299 | 0.5890 | 0.0001  | 0.0217 | 0.9978 | 16.3189 | 0.1771 | -16.5621  |
| s_Eubacterium_siraeum          | SmallVesselStroke   | Weighted mode             | 14 | 1.0093 | 0.9260 | 1.1002 | 0.8356 | 0.0001  | 0.0217 | 0.9978 | 16.3189 | 0.1771 | -16.5621  |
| s_Eubacterium_siraeum          | Stroke              | MR Egger                  | 20 | 1.0057 | 0.9762 | 1.0362 | 0.7112 | 0.0012  | 0.0084 | 0.8885 | 13.9817 | 0.7303 | -33.2124  |
| s_Eubacterium_siraeum          | Stroke              | Weighted median           | 20 | 1.0116 | 0.9882 | 1.0356 | 0.3326 | 0.0012  | 0.0084 | 0.8885 | 13.9817 | 0.7303 | -33.2124  |
| s_Eubacterium_siraeum          | Stroke              | Inverse variance weighted | 20 | 1.0075 | 0.9910 | 1.0244 | 0.3737 | 0.0012  | 0.0084 | 0.8885 | 13.9817 | 0.7303 | -33.2124  |
| s_Eubacterium_siraeum          | Stroke              | Simple mode               | 20 | 1.0098 | 0.9679 | 1.0535 | 0.6561 | 0.0012  | 0.0084 | 0.8885 | 13.9817 | 0.7303 | -33.2124  |
| s_Eubacterium_siraeum          | Stroke              | Weighted mode             | 20 | 1.0187 | 0.9820 | 1.0568 | 0.3341 | 0.0012  | 0.0084 | 0.8885 | 13.9817 | 0.7303 | -33.2124  |
| s_Eubacterium_ventriosum       | CardioEmbolicStroke | MR Egger                  | 11 | 0.6779 | 0.3192 | 1.4397 | 0.3382 | 0.0388  | 0.0904 | 0.6777 | 8.7622  | 0.4595 | 97.2424   |
| s_Eubacterium_ventriosum       | CardioEmbolicStroke | Weighted median           | 11 | 0.8554 | 0.6875 | 1.0644 | 0.1614 | 0.0388  | 0.0904 | 0.6777 | 8.7622  | 0.4595 | 97.2424   |
| s_Eubacterium_ventriosum       | CardioEmbolicStroke | Inverse variance weighted | 11 | 0.7968 | 0.6844 | 0.9278 | 0.0034 | 0.0388  | 0.0904 | 0.6777 | 8.7622  | 0.4595 | 97.2424   |
| s_Eubacterium_ventriosum       | CardioEmbolicStroke | Simple mode               | 11 | 0.9058 | 0.6640 | 1.2358 | 0.5465 | 0.0388  | 0.0904 | 0.6777 | 8.7622  | 0.4595 | 97.2424   |
| s_Eubacterium_ventriosum       | CardioEmbolicStroke | Weighted mode             | 11 | 0.9154 | 0.6894 | 1.2154 | 0.5545 | 0.0388  | 0.0904 | 0.6777 | 8.7622  | 0.4595 | 97.2424   |
| s_Eubacterium_ventriosum       | IschemicStroke      | MR Egger                  | 17 | 1.0271 | 0.9493 | 1.1112 | 0.5160 | -0.0144 | 0.0110 | 0.2092 | 14.7065 | 0.5462 | -234.3898 |
| s_Eubacterium_ventriosum       | IschemicStroke      | Weighted median           | 17 | 0.9823 | 0.9440 | 1.0221 | 0.3772 | -0.0144 | 0.0110 | 0.2092 | 14.7065 | 0.5462 | -234.3898 |
| s_Eubacterium_ventriosum       | IschemicStroke      | Inverse variance weighted | 17 | 0.9780 | 0.9500 | 1.0068 | 0.1331 | -0.0144 | 0.0110 | 0.2092 | 14.7065 | 0.5462 | -234.3898 |
| s_Eubacterium_ventriosum       | IschemicStroke      | Simple mode               | 17 | 0.9888 | 0.9159 | 1.0675 | 0.7770 | -0.0144 | 0.0110 | 0.2092 | 14.7065 | 0.5462 | -234.3898 |
| s_Eubacterium_ventriosum       | IschemicStroke      | Weighted mode             | 17 | 0.9896 | 0.9295 | 1.0535 | 0.7467 | -0.0144 | 0.0110 | 0.2092 | 14.7065 | 0.5462 | -234.3898 |
| s_Eubacterium_ventriosum       | LargeArteryStroke   | MR Egger                  | 15 | 0.9107 | 0.6896 | 1.2028 | 0.5215 | 0.0459  | 0.0376 | 0.2436 | 9.8840  | 0.7706 | -81.5117  |
| s_Eubacterium_ventriosum       | LargeArteryStroke   | Weighted median           | 15 | 1.0904 | 0.9521 | 1.2487 | 0.2113 | 0.0459  | 0.0376 | 0.2436 | 9.8840  | 0.7706 | -81.5117  |
| s_Eubacterium_ventriosum       | LargeArteryStroke   | Inverse variance weighted | 15 | 1.0712 | 0.9714 | 1.1812 | 0.1679 | 0.0459  | 0.0376 | 0.2436 | 9.8840  | 0.7706 | -81.5117  |
| s_Eubacterium_ventriosum       | LargeArteryStroke   | Simple mode               | 15 | 1.1129 | 0.9040 | 1.3701 | 0.3302 | 0.0459  | 0.0376 | 0.2436 | 9.8840  | 0.7706 | -81.5117  |
| s_Eubacterium_ventriosum       | LargeArteryStroke   | Weighted mode             | 15 | 1.0923 | 0.8978 | 1.3290 | 0.3923 | 0.0459  | 0.0376 | 0.2436 | 9.8840  | 0.7706 | -81.5117  |
| s_Eubacterium_ventriosum       | SmallVesselStroke   | MR Egger                  | 16 | 0.9905 | 0.8579 | 1.1436 | 0.8981 | 0.0076  | 0.0199 | 0.7097 | 9.6289  | 0.7888 | -131.8743 |
| s_Eubacterium_ventriosum       | SmallVesselStroke   | Weighted median           | 16 | 1.0104 | 0.9371 | 1.0894 | 0.7883 | 0.0076  | 0.0199 | 0.7097 | 9.6289  | 0.7888 | -131.8743 |
| s_Eubacterium_ventriosum       | SmallVesselStroke   | Inverse variance weighted | 16 | 1.0165 | 0.9641 | 1.0717 | 0.5449 | 0.0076  | 0.0199 | 0.7097 | 9.6289  | 0.7888 | -131.8743 |
| s_Eubacterium_ventriosum       | SmallVesselStroke   | Simple mode               | 16 | 1.0108 | 0.8928 | 1.1444 | 0.8676 | 0.0076  | 0.0199 | 0.7097 | 9.6289  | 0.7888 | -131.8743 |
| s_Eubacterium_ventriosum       | SmallVesselStroke   | Weighted mode             | 16 | 1.0072 | 0.8992 | 1.1282 | 0.9026 | 0.0076  | 0.0199 | 0.7097 | 9.6289  | 0.7888 | -131.8743 |
| s_Eubacterium_ventriosum       | Stroke              | MR Egger                  | 17 | 1.0336 | 0.9583 | 1.1148 | 0.4056 | -0.0139 | 0.0105 | 0.2055 | 21.4547 | 0.1617 | -262.5224 |
| s_Eubacterium_ventriosum       | Stroke              | Weighted median           | 17 | 1.0075 | 0.9725 | 1.0438 | 0.6775 | -0.0139 | 0.0105 | 0.2055 | 21.4547 | 0.1617 | -262.5224 |
| s_Eubacterium_ventriosum       | Stroke              | Inverse variance weighted | 17 | 0.9857 | 0.9578 | 1.0144 | 0.3245 | -0.0139 | 0.0105 | 0.2055 | 21.4547 | 0.1617 | -262.5224 |
| s_Eubacterium_ventriosum       | Stroke              | Simple mode               | 17 | 1.0210 | 0.9598 | 1.0860 | 0.5194 | -0.0139 | 0.0105 | 0.2055 | 21.4547 | 0.1617 | -262.5224 |
| s_Eubacterium_ventriosum       | Stroke              | Weighted mode             | 17 | 1.0172 | 0.9634 | 1.0739 | 0.5476 | -0.0139 | 0.0105 | 0.2055 | 21.4547 | 0.1617 | -262.5224 |
| s_Faecalibacterium_prausnitzii | CardioEmbolicStroke | MR Egger                  | 10 | 1.1479 | 0.7871 | 1.6740 | 0.4941 | -0.0261 | 0.0627 | 0.6882 | 3.8415  | 0.8711 | -501.8796 |
| s_Faecalibacterium_prausnitzii | CardioEmbolicStroke | Weighted median           | 10 | 1.1178 | 0.9355 | 1.3357 | 0.2201 | -0.0261 | 0.0627 | 0.6882 | 3.8415  | 0.8711 | -501.8796 |
| s_Faecalibacterium_prausnitzii | CardioEmbolicStroke | Inverse variance weighted | 10 | 1.0650 | 0.9326 | 1.2161 | 0.3529 | -0.0261 | 0.0627 | 0.6882 | 3.8415  | 0.8711 | -501.8796 |
| s_Faecalibacterium_prausnitzii | CardioEmbolicStroke | Simple mode               | 10 | 1.1678 | 0.8719 | 1.5640 | 0.3254 | -0.0261 | 0.0627 | 0.6882 | 3.8415  | 0.8711 | -501.8796 |
| s_Faecalibacterium_prausnitzii | CardioEmbolicStroke | Weighted mode             | 10 | 1.1810 | 0.8728 | 1.5980 | 0.3090 | -0.0261 | 0.0627 | 0.6882 | 3.8415  | 0.8711 | -501.8796 |
| s_Faecalibacterium_prausnitzii | IschemicStroke      | MR Egger                  | 30 | 0.9981 | 0.9673 | 1.0299 | 0.9048 | -0.0027 | 0.0086 | 0.7592 | 32.9541 | 0.2374 | -17.6006  |
| s_Faecalibacterium_prausnitzii | IschemicStroke      | Weighted median           | 30 | 1.0020 | 0.9784 | 1.0261 | 0.8722 | -0.0027 | 0.0086 | 0.7592 | 32.9541 | 0.2374 | -17.6006  |

|                                |                     |                           |    |        |        |        |        |         |        |        |         |        |           |
|--------------------------------|---------------------|---------------------------|----|--------|--------|--------|--------|---------|--------|--------|---------|--------|-----------|
| s_Faecalibacterium_prausnitzii | IschemicStroke      | Inverse variance weighted | 30 | 0.9940 | 0.9769 | 1.0114 | 0.4949 | -0.0027 | 0.0086 | 0.7592 | 32.9541 | 0.2374 | -17.6006  |
| s_Faecalibacterium_prausnitzii | IschemicStroke      | Simple mode               | 30 | 0.9859 | 0.9453 | 1.0281 | 0.5116 | -0.0027 | 0.0086 | 0.7592 | 32.9541 | 0.2374 | -17.6006  |
| s_Faecalibacterium_prausnitzii | IschemicStroke      | Weighted mode             | 30 | 0.9933 | 0.9616 | 1.0261 | 0.6884 | -0.0027 | 0.0086 | 0.7592 | 32.9541 | 0.2374 | -17.6006  |
| s_Faecalibacterium_prausnitzii | LargeArteryStroke   | MR Egger                  | 19 | 0.9512 | 0.8341 | 1.0847 | 0.4653 | 0.0247  | 0.0328 | 0.4610 | 24.9798 | 0.0952 | -6.0361   |
| s_Faecalibacterium_prausnitzii | LargeArteryStroke   | Weighted median           | 19 | 1.0107 | 0.9239 | 1.1056 | 0.8166 | 0.0247  | 0.0328 | 0.4610 | 24.9798 | 0.0952 | -6.0361   |
| s_Faecalibacterium_prausnitzii | LargeArteryStroke   | Inverse variance weighted | 19 | 0.9920 | 0.9230 | 1.0661 | 0.8275 | 0.0247  | 0.0328 | 0.4610 | 24.9798 | 0.0952 | -6.0361   |
| s_Faecalibacterium_prausnitzii | LargeArteryStroke   | Simple mode               | 19 | 1.0223 | 0.8725 | 1.1978 | 0.7884 | 0.0247  | 0.0328 | 0.4610 | 24.9798 | 0.0952 | -6.0361   |
| s_Faecalibacterium_prausnitzii | LargeArteryStroke   | Weighted mode             | 19 | 1.0345 | 0.9102 | 1.1756 | 0.6100 | 0.0247  | 0.0328 | 0.4610 | 24.9798 | 0.0952 | -6.0361   |
| s_Faecalibacterium_prausnitzii | SmallVesselStroke   | MR Egger                  | 22 | 1.0061 | 0.9447 | 1.0714 | 0.8527 | -0.0080 | 0.0157 | 0.6170 | 21.8539 | 0.3485 | -16.4630  |
| s_Faecalibacterium_prausnitzii | SmallVesselStroke   | Weighted median           | 22 | 0.9877 | 0.9423 | 1.0353 | 0.6057 | -0.0080 | 0.0157 | 0.6170 | 21.8539 | 0.3485 | -16.4630  |
| s_Faecalibacterium_prausnitzii | SmallVesselStroke   | Inverse variance weighted | 22 | 0.9924 | 0.9594 | 1.0266 | 0.6593 | -0.0080 | 0.0157 | 0.6170 | 21.8539 | 0.3485 | -16.4630  |
| s_Faecalibacterium_prausnitzii | SmallVesselStroke   | Simple mode               | 22 | 0.9809 | 0.9027 | 1.0660 | 0.6547 | -0.0080 | 0.0157 | 0.6170 | 21.8539 | 0.3485 | -16.4630  |
| s_Faecalibacterium_prausnitzii | SmallVesselStroke   | Weighted mode             | 22 | 0.9873 | 0.9266 | 1.0519 | 0.6962 | -0.0080 | 0.0157 | 0.6170 | 21.8539 | 0.3485 | -16.4630  |
| s_Faecalibacterium_prausnitzii | Stroke              | MR Egger                  | 28 | 0.9934 | 0.9649 | 1.0228 | 0.6597 | -0.0026 | 0.0072 | 0.7195 | 23.8273 | 0.5858 | -29.5601  |
| s_Faecalibacterium_prausnitzii | Stroke              | Weighted median           | 28 | 0.9916 | 0.9696 | 1.0141 | 0.4634 | -0.0026 | 0.0072 | 0.7195 | 23.8273 | 0.5858 | -29.5601  |
| s_Faecalibacterium_prausnitzii | Stroke              | Inverse variance weighted | 28 | 0.9889 | 0.9736 | 1.0044 | 0.1605 | -0.0026 | 0.0072 | 0.7195 | 23.8273 | 0.5858 | -29.5601  |
| s_Faecalibacterium_prausnitzii | Stroke              | Simple mode               | 28 | 0.9782 | 0.9361 | 1.0222 | 0.3358 | -0.0026 | 0.0072 | 0.7195 | 23.8273 | 0.5858 | -29.5601  |
| s_Faecalibacterium_prausnitzii | Stroke              | Weighted mode             | 28 | 0.9999 | 0.9659 | 1.0351 | 0.9953 | -0.0026 | 0.0072 | 0.7195 | 23.8273 | 0.5858 | -29.5601  |
| s_Gemella_sanguinis            | CardioEmbolicStroke | MR Egger                  | 9  | 1.0539 | 0.4787 | 2.3200 | 0.8999 | 0.0160  | 0.1131 | 0.8913 | 8.6834  | 0.2762 | 2428.2380 |
| s_Gemella_sanguinis            | CardioEmbolicStroke | Weighted median           | 9  | 1.0884 | 0.8839 | 1.3402 | 0.4248 | 0.0160  | 0.1131 | 0.8913 | 8.6834  | 0.2762 | 2428.2380 |
| s_Gemella_sanguinis            | CardioEmbolicStroke | Inverse variance weighted | 9  | 1.1142 | 0.9483 | 1.3092 | 0.1885 | 0.0160  | 0.1131 | 0.8913 | 8.6834  | 0.2762 | 2428.2380 |
| s_Gemella_sanguinis            | CardioEmbolicStroke | Simple mode               | 9  | 1.0191 | 0.7326 | 1.4175 | 0.9135 | 0.0160  | 0.1131 | 0.8913 | 8.6834  | 0.2762 | 2428.2380 |
| s_Gemella_sanguinis            | CardioEmbolicStroke | Weighted mode             | 9  | 1.0441 | 0.7665 | 1.4222 | 0.7913 | 0.0160  | 0.1131 | 0.8913 | 8.6834  | 0.2762 | 2428.2380 |
| s_Gemella_sanguinis            | IschemicStroke      | MR Egger                  | 21 | 0.9630 | 0.9180 | 1.0102 | 0.1389 | 0.0133  | 0.0097 | 0.1862 | 24.2465 | 0.2318 | -25.8174  |
| s_Gemella_sanguinis            | IschemicStroke      | Weighted median           | 21 | 1.0142 | 0.9802 | 1.0494 | 0.4179 | 0.0133  | 0.0097 | 0.1862 | 24.2465 | 0.2318 | -25.8174  |
| s_Gemella_sanguinis            | IschemicStroke      | Inverse variance weighted | 21 | 0.9911 | 0.9666 | 1.0162 | 0.4834 | 0.0133  | 0.0097 | 0.1862 | 24.2465 | 0.2318 | -25.8174  |
| s_Gemella_sanguinis            | IschemicStroke      | Simple mode               | 21 | 1.0255 | 0.9592 | 1.0964 | 0.4687 | 0.0133  | 0.0097 | 0.1862 | 24.2465 | 0.2318 | -25.8174  |
| s_Gemella_sanguinis            | IschemicStroke      | Weighted mode             | 21 | 1.0351 | 0.9659 | 1.1093 | 0.3403 | 0.0133  | 0.0097 | 0.1862 | 24.2465 | 0.2318 | -25.8174  |
| s_Gemella_sanguinis            | LargeArteryStroke   | MR Egger                  | 15 | 1.0268 | 0.7995 | 1.3185 | 0.8393 | -0.0298 | 0.0421 | 0.4910 | 13.9431 | 0.3779 | -20.7510  |
| s_Gemella_sanguinis            | LargeArteryStroke   | Weighted median           | 15 | 0.9553 | 0.8386 | 1.0882 | 0.4914 | -0.0298 | 0.0421 | 0.4910 | 13.9431 | 0.3779 | -20.7510  |
| s_Gemella_sanguinis            | LargeArteryStroke   | Inverse variance weighted | 15 | 0.9443 | 0.8604 | 1.0363 | 0.2272 | -0.0298 | 0.0421 | 0.4910 | 13.9431 | 0.3779 | -20.7510  |
| s_Gemella_sanguinis            | LargeArteryStroke   | Simple mode               | 15 | 0.9611 | 0.7767 | 1.1892 | 0.7202 | -0.0298 | 0.0421 | 0.4910 | 13.9431 | 0.3779 | -20.7510  |
| s_Gemella_sanguinis            | LargeArteryStroke   | Weighted mode             | 15 | 0.9696 | 0.8053 | 1.1674 | 0.7494 | -0.0298 | 0.0421 | 0.4910 | 13.9431 | 0.3779 | -20.7510  |
| s_Gemella_sanguinis            | SmallVesselStroke   | MR Egger                  | 15 | 1.0720 | 0.9371 | 1.2263 | 0.3297 | -0.0251 | 0.0227 | 0.2881 | 13.0795 | 0.5203 | -71.9517  |
| s_Gemella_sanguinis            | SmallVesselStroke   | Weighted median           | 15 | 0.9881 | 0.9205 | 1.0607 | 0.7403 | -0.0251 | 0.0227 | 0.2881 | 13.0795 | 0.5203 | -71.9517  |
| s_Gemella_sanguinis            | SmallVesselStroke   | Inverse variance weighted | 15 | 0.9991 | 0.9496 | 1.0513 | 0.9735 | -0.0251 | 0.0227 | 0.2881 | 13.0795 | 0.5203 | -71.9517  |
| s_Gemella_sanguinis            | SmallVesselStroke   | Simple mode               | 15 | 0.9402 | 0.8137 | 1.0863 | 0.4166 | -0.0251 | 0.0227 | 0.2881 | 13.0795 | 0.5203 | -71.9517  |
| s_Gemella_sanguinis            | SmallVesselStroke   | Weighted mode             | 15 | 0.9413 | 0.8124 | 1.0907 | 0.4344 | -0.0251 | 0.0227 | 0.2881 | 13.0795 | 0.5203 | -71.9517  |
| s_Gemella_sanguinis            | Stroke              | MR Egger                  | 19 | 0.9915 | 0.9429 | 1.0426 | 0.7440 | 0.0037  | 0.0093 | 0.6911 | 17.2626 | 0.4367 | -97.7565  |
| s_Gemella_sanguinis            | Stroke              | Weighted median           | 19 | 1.0173 | 0.9873 | 1.0483 | 0.2613 | 0.0037  | 0.0093 | 0.6911 | 17.2626 | 0.4367 | -97.7565  |
| s_Gemella_sanguinis            | Stroke              | Inverse variance weighted | 19 | 1.0008 | 0.9795 | 1.0227 | 0.9396 | 0.0037  | 0.0093 | 0.6911 | 17.2626 | 0.4367 | -97.7565  |
| s_Gemella_sanguinis            | Stroke              | Simple mode               | 19 | 1.0212 | 0.9645 | 1.0812 | 0.4808 | 0.0037  | 0.0093 | 0.6911 | 17.2626 | 0.4367 | -97.7565  |
| s_Gemella_sanguinis            | Stroke              | Weighted mode             | 19 | 1.0225 | 0.9694 | 1.0785 | 0.4237 | 0.0037  | 0.0093 | 0.6911 | 17.2626 | 0.4367 | -97.7565  |
| s_Granulicatella_adiacens      | CardioEmbolicStroke | MR Egger                  | 7  | 0.7654 | 0.4007 | 1.4621 | 0.4550 | 0.1013  | 0.0785 | 0.2536 | 8.4371  | 0.2078 | 256.5217  |
| s_Granulicatella_adiacens      | CardioEmbolicStroke | Weighted median           | 7  | 1.0397 | 0.7829 | 1.3808 | 0.7878 | 0.1013  | 0.0785 | 0.2536 | 8.4371  | 0.2078 | 256.5217  |
| s_Granulicatella_adiacens      | CardioEmbolicStroke | Inverse variance weighted | 7  | 1.1400 | 0.8958 | 1.4509 | 0.2868 | 0.1013  | 0.0785 | 0.2536 | 8.4371  | 0.2078 | 256.5217  |
| s_Granulicatella_adiacens      | CardioEmbolicStroke | Simple mode               | 7  | 0.9750 | 0.5940 | 1.6004 | 0.9236 | 0.1013  | 0.0785 | 0.2536 | 8.4371  | 0.2078 | 256.5217  |
| s_Granulicatella_adiacens      | CardioEmbolicStroke | Weighted mode             | 7  | 0.9590 | 0.6222 | 1.4782 | 0.8559 | 0.1013  | 0.0785 | 0.2536 | 8.4371  | 0.2078 | 256.5217  |
| s_Granulicatella_adiacens      | IschemicStroke      | MR Egger                  | 16 | 0.9899 | 0.9206 | 1.0645 | 0.7890 | 0.0068  | 0.0108 | 0.5384 | 16.4480 | 0.2868 | -102.5786 |
| s_Granulicatella_adiacens      | IschemicStroke      | Weighted median           | 16 | 1.0158 | 0.9693 | 1.0644 | 0.5123 | 0.0068  | 0.0108 | 0.5384 | 16.4480 | 0.2868 | -102.5786 |
| s_Granulicatella_adiacens      | IschemicStroke      | Inverse variance weighted | 16 | 1.0104 | 0.9762 | 1.0458 | 0.5563 | 0.0068  | 0.0108 | 0.5384 | 16.4480 | 0.2868 | -102.5786 |
| s_Granulicatella_adiacens      | IschemicStroke      | Simple mode               | 16 | 1.0192 | 0.9325 | 1.1139 | 0.6810 | 0.0068  | 0.0108 | 0.5384 | 16.4480 | 0.2868 | -102.5786 |
| s_Granulicatella_adiacens      | IschemicStroke      | Weighted mode             | 16 | 1.0137 | 0.9278 | 1.1075 | 0.7675 | 0.0068  | 0.0108 | 0.5384 | 16.4480 | 0.2868 | -102.5786 |

|                                |                     |                           |    |        |        |        |        |         |        |        |         |        |             |
|--------------------------------|---------------------|---------------------------|----|--------|--------|--------|--------|---------|--------|--------|---------|--------|-------------|
| s_Granulicatella_adiacens      | LargeArteryStroke   | MR Egger                  | 13 | 0.8806 | 0.6723 | 1.1535 | 0.3758 | 0.0108  | 0.0403 | 0.7944 | 13.3699 | 0.2698 | -17.0443    |
| s_Granulicatella_adiacens      | LargeArteryStroke   | Weighted median           | 13 | 0.8941 | 0.7541 | 1.0601 | 0.1977 | 0.0108  | 0.0403 | 0.7944 | 13.3699 | 0.2698 | -17.0443    |
| s_Granulicatella_adiacens      | LargeArteryStroke   | Inverse variance weighted | 13 | 0.9096 | 0.8040 | 1.0290 | 0.1322 | 0.0108  | 0.0403 | 0.7944 | 13.3699 | 0.2698 | -17.0443    |
| s_Granulicatella_adiacens      | LargeArteryStroke   | Simple mode               | 13 | 0.8437 | 0.6351 | 1.1208 | 0.2636 | 0.0108  | 0.0403 | 0.7944 | 13.3699 | 0.2698 | -17.0443    |
| s_Granulicatella_adiacens      | LargeArteryStroke   | Weighted mode             | 13 | 0.8970 | 0.7110 | 1.1317 | 0.3773 | 0.0108  | 0.0403 | 0.7944 | 13.3699 | 0.2698 | -17.0443    |
| s_Granulicatella_adiacens      | SmallVesselStroke   | MR Egger                  | 13 | 0.9175 | 0.7827 | 1.0755 | 0.3109 | 0.0401  | 0.0238 | 0.1193 | 18.8854 | 0.0913 | -41.4081    |
| s_Granulicatella_adiacens      | SmallVesselStroke   | Weighted median           | 13 | 1.0210 | 0.9264 | 1.1253 | 0.6748 | 0.0401  | 0.0238 | 0.1193 | 18.8854 | 0.0913 | -41.4081    |
| s_Granulicatella_adiacens      | SmallVesselStroke   | Inverse variance weighted | 13 | 1.0349 | 0.9543 | 1.1224 | 0.4065 | 0.0401  | 0.0238 | 0.1193 | 18.8854 | 0.0913 | -41.4081    |
| s_Granulicatella_adiacens      | SmallVesselStroke   | Simple mode               | 13 | 1.0723 | 0.8962 | 1.2830 | 0.4603 | 0.0401  | 0.0238 | 0.1193 | 18.8854 | 0.0913 | -41.4081    |
| s_Granulicatella_adiacens      | SmallVesselStroke   | Weighted mode             | 13 | 1.0420 | 0.8864 | 1.2248 | 0.6272 | 0.0401  | 0.0238 | 0.1193 | 18.8854 | 0.0913 | -41.4081    |
| s_Granulicatella_adiacens      | Stroke              | MR Egger                  | 15 | 1.0349 | 0.9661 | 1.1085 | 0.3466 | -0.0050 | 0.0096 | 0.6119 | 10.6080 | 0.6436 | NA          |
| s_Granulicatella_adiacens      | Stroke              | Weighted median           | 15 | 1.0326 | 0.9914 | 1.0756 | 0.1226 | -0.0050 | 0.0096 | 0.6119 | 10.6080 | 0.6436 | NA          |
| s_Granulicatella_adiacens      | Stroke              | Inverse variance weighted | 15 | 1.0180 | 0.9881 | 1.0488 | 0.2416 | -0.0050 | 0.0096 | 0.6119 | 10.6080 | 0.6436 | NA          |
| s_Granulicatella_adiacens      | Stroke              | Simple mode               | 15 | 1.0431 | 0.9757 | 1.1152 | 0.2356 | -0.0050 | 0.0096 | 0.6119 | 10.6080 | 0.6436 | NA          |
| s_Granulicatella_adiacens      | Stroke              | Weighted mode             | 15 | 1.0431 | 0.9840 | 1.1058 | 0.1778 | -0.0050 | 0.0096 | 0.6119 | 10.6080 | 0.6436 | NA          |
| s_Haemophilus_influenzae       | CardioEmbolicStroke | MR Egger                  | 11 | 1.0475 | 0.7694 | 1.4260 | 0.7749 | -0.0386 | 0.0710 | 0.6001 | 3.6022  | 0.9356 | NA          |
| s_Haemophilus_influenzae       | CardioEmbolicStroke | Weighted median           | 11 | 0.9882 | 0.8868 | 1.1012 | 0.8296 | -0.0386 | 0.0710 | 0.6001 | 3.6022  | 0.9356 | NA          |
| s_Haemophilus_influenzae       | CardioEmbolicStroke | Inverse variance weighted | 11 | 0.9647 | 0.8870 | 1.0493 | 0.4026 | -0.0386 | 0.0710 | 0.6001 | 3.6022  | 0.9356 | NA          |
| s_Haemophilus_influenzae       | CardioEmbolicStroke | Simple mode               | 11 | 1.0065 | 0.8472 | 1.1957 | 0.9429 | -0.0386 | 0.0710 | 0.6001 | 3.6022  | 0.9356 | NA          |
| s_Haemophilus_influenzae       | CardioEmbolicStroke | Weighted mode             | 11 | 1.0160 | 0.8597 | 1.2007 | 0.8561 | -0.0386 | 0.0710 | 0.6001 | 3.6022  | 0.9356 | NA          |
| s_butyrate-producing_bacterium | CardioEmbolicStroke | MR Egger                  | 10 | 1.0025 | 0.5447 | 1.8449 | 0.9938 | -0.0372 | 0.0872 | 0.6806 | 4.8831  | 0.7700 | -79920.9491 |
| s_butyrate-producing_bacterium | CardioEmbolicStroke | Weighted median           | 10 | 0.8266 | 0.6975 | 0.9797 | 0.0280 | -0.0372 | 0.0872 | 0.6806 | 4.8831  | 0.7700 | -79920.9491 |
| s_butyrate-producing_bacterium | CardioEmbolicStroke | Inverse variance weighted | 10 | 0.8803 | 0.7753 | 0.9995 | 0.0491 | -0.0372 | 0.0872 | 0.6806 | 4.8831  | 0.7700 | -79920.9491 |
| s_butyrate-producing_bacterium | CardioEmbolicStroke | Simple mode               | 10 | 0.8058 | 0.6159 | 1.0541 | 0.1496 | -0.0372 | 0.0872 | 0.6806 | 4.8831  | 0.7700 | -79920.9491 |
| s_butyrate-producing_bacterium | CardioEmbolicStroke | Weighted mode             | 10 | 0.8058 | 0.5957 | 1.0899 | 0.1947 | -0.0372 | 0.0872 | 0.6806 | 4.8831  | 0.7700 | -79920.9491 |
| s_butyrate-producing_bacterium | IschemicStroke      | MR Egger                  | 13 | 0.9583 | 0.8931 | 1.0282 | 0.2606 | 0.0047  | 0.0112 | 0.6826 | 10.4495 | 0.4905 | -84.6917    |
| s_butyrate-producing_bacterium | IschemicStroke      | Weighted median           | 13 | 0.9745 | 0.9404 | 1.0097 | 0.1540 | 0.0047  | 0.0112 | 0.6826 | 10.4495 | 0.4905 | -84.6917    |
| s_butyrate-producing_bacterium | IschemicStroke      | Inverse variance weighted | 13 | 0.9718 | 0.9468 | 0.9975 | 0.0315 | 0.0047  | 0.0112 | 0.6826 | 10.4495 | 0.4905 | -84.6917    |
| s_butyrate-producing_bacterium | IschemicStroke      | Simple mode               | 13 | 0.9728 | 0.9235 | 1.0247 | 0.3194 | 0.0047  | 0.0112 | 0.6826 | 10.4495 | 0.4905 | -84.6917    |
| s_butyrate-producing_bacterium | IschemicStroke      | Weighted mode             | 13 | 0.9714 | 0.9216 | 1.0239 | 0.3010 | 0.0047  | 0.0112 | 0.6826 | 10.4495 | 0.4905 | -84.6917    |
| s_butyrate-producing_bacterium | LargeArteryStroke   | MR Egger                  | 13 | 0.9196 | 0.7310 | 1.1567 | 0.4887 | 0.0000  | 0.0363 | 0.9991 | 4.6088  | 0.9486 | -38.7258    |
| s_butyrate-producing_bacterium | LargeArteryStroke   | Weighted median           | 13 | 0.9086 | 0.8122 | 1.0164 | 0.0939 | 0.0000  | 0.0363 | 0.9991 | 4.6088  | 0.9486 | -38.7258    |
| s_butyrate-producing_bacterium | LargeArteryStroke   | Inverse variance weighted | 13 | 0.9194 | 0.8450 | 1.0004 | 0.0512 | 0.0000  | 0.0363 | 0.9991 | 4.6088  | 0.9486 | -38.7258    |
| s_butyrate-producing_bacterium | LargeArteryStroke   | Simple mode               | 13 | 0.8972 | 0.7542 | 1.0674 | 0.2444 | 0.0000  | 0.0363 | 0.9991 | 4.6088  | 0.9486 | -38.7258    |
| s_butyrate-producing_bacterium | LargeArteryStroke   | Weighted mode             | 13 | 0.9012 | 0.7589 | 1.0702 | 0.2583 | 0.0000  | 0.0363 | 0.9991 | 4.6088  | 0.9486 | -38.7258    |
| s_butyrate-producing_bacterium | SmallVesselStroke   | MR Egger                  | 13 | 0.9812 | 0.8653 | 1.1127 | 0.7734 | 0.0041  | 0.0200 | 0.8410 | 8.2215  | 0.6933 | -59.1534    |
| s_butyrate-producing_bacterium | SmallVesselStroke   | Weighted median           | 13 | 0.9905 | 0.9325 | 1.0521 | 0.7564 | 0.0041  | 0.0200 | 0.8410 | 8.2215  | 0.6933 | -59.1534    |
| s_butyrate-producing_bacterium | SmallVesselStroke   | Inverse variance weighted | 13 | 0.9933 | 0.9479 | 1.0410 | 0.7793 | 0.0041  | 0.0200 | 0.8410 | 8.2215  | 0.6933 | -59.1534    |
| s_butyrate-producing_bacterium | SmallVesselStroke   | Simple mode               | 13 | 0.9957 | 0.9139 | 1.0847 | 0.9222 | 0.0041  | 0.0200 | 0.8410 | 8.2215  | 0.6933 | -59.1534    |
| s_butyrate-producing_bacterium | SmallVesselStroke   | Weighted mode             | 13 | 0.9833 | 0.8986 | 1.0759 | 0.7197 | 0.0041  | 0.0200 | 0.8410 | 8.2215  | 0.6933 | -59.1534    |
| s_butyrate-producing_bacterium | Stroke              | MR Egger                  | 12 | 1.0101 | 0.9327 | 1.0941 | 0.8093 | -0.0048 | 0.0120 | 0.6993 | 4.0876  | 0.9433 | -969.4301   |
| s_butyrate-producing_bacterium | Stroke              | Weighted median           | 12 | 0.9890 | 0.9600 | 1.0189 | 0.4666 | -0.0048 | 0.0120 | 0.6993 | 4.0876  | 0.9433 | -969.4301   |
| s_butyrate-producing_bacterium | Stroke              | Inverse variance weighted | 12 | 0.9946 | 0.9717 | 1.0181 | 0.6507 | -0.0048 | 0.0120 | 0.6993 | 4.0876  | 0.9433 | -969.4301   |
| s_butyrate-producing_bacterium | Stroke              | Simple mode               | 12 | 0.9885 | 0.9422 | 1.0370 | 0.6449 | -0.0048 | 0.0120 | 0.6993 | 4.0876  | 0.9433 | -969.4301   |
| s_butyrate-producing_bacterium | Stroke              | Weighted mode             | 12 | 0.9873 | 0.9413 | 1.0355 | 0.6088 | -0.0048 | 0.0120 | 0.6993 | 4.0876  | 0.9433 | -969.4301   |
| MF0057                         | CardioEmbolicStroke | Wald ratio                | 1  | 1.1827 | 0.5997 | 2.3325 | 0.6282 | NA      | NA     | NA     | NA      | NA     | NA          |

Table.S3. Mendelian Randomization result for gut microbiome to stoke in EU

| exposure                             | outcome             | method                    | nsnp | OR      | lower 95CI | upper 95CI | pval   | egger intercept | pleio se | pleio p Q | Q pval | sensitivity ratio |         |
|--------------------------------------|---------------------|---------------------------|------|---------|------------|------------|--------|-----------------|----------|-----------|--------|-------------------|---------|
| class. Actinobacteria. id. 419       | CardioEmbolicStroke | MR Egger                  | 7    | 0.4462  | 0.1589     | 1.2529     | 0.1861 | 0.0690          | 0.0412   | 0.1547    | 9.3612 | 0.1543            | 8.6779  |
| class. Actinobacteria. id. 419       | CardioEmbolicStroke | Weighted median           | 7    | 0.9898  | 0.7108     | 1.3783     | 0.9518 | 0.0690          | 0.0412   | 0.1547    | 9.3612 | 0.1543            | 8.6779  |
| class. Actinobacteria. id. 419       | CardioEmbolicStroke | Inverse variance weighted | 7    | 1.0502  | 0.7879     | 1.3999     | 0.7381 | 0.0690          | 0.0412   | 0.1547    | 9.3612 | 0.1543            | 8.6779  |
| class. Actinobacteria. id. 419       | CardioEmbolicStroke | Simple mode               | 7    | 0.9318  | 0.5663     | 1.5332     | 0.7903 | 0.0690          | 0.0412   | 0.1547    | 9.3612 | 0.1543            | 8.6779  |
| class. Actinobacteria. id. 419       | CardioEmbolicStroke | Weighted mode             | 7    | 0.9636  | 0.6169     | 1.5051     | 0.8759 | 0.0690          | 0.0412   | 0.1547    | 9.3612 | 0.1543            | 8.6779  |
| class. Actinobacteria. id. 419       | IschemicStroke      | MR Egger                  | 7    | 0.6513  | 0.4331     | 0.9796     | 0.0945 | 0.0357          | 0.0163   | 0.0805    | 8.8681 | 0.1811            | 27.2030 |
| class. Actinobacteria. id. 419       | IschemicStroke      | Weighted median           | 7    | 0.9947  | 0.8648     | 1.1441     | 0.9411 | 0.0357          | 0.0163   | 0.0805    | 8.8681 | 0.1811            | 27.2030 |
| class. Actinobacteria. id. 419       | IschemicStroke      | Inverse variance weighted | 7    | 1.0123  | 0.8954     | 1.1445     | 0.8448 | 0.0357          | 0.0163   | 0.0805    | 8.8681 | 0.1811            | 27.2030 |
| class. Actinobacteria. id. 419       | IschemicStroke      | Simple mode               | 7    | 0.9443  | 0.7651     | 1.1655     | 0.6127 | 0.0357          | 0.0163   | 0.0805    | 8.8681 | 0.1811            | 27.2030 |
| class. Actinobacteria. id. 419       | IschemicStroke      | Weighted mode             | 7    | 0.9711  | 0.7995     | 1.1795     | 0.7775 | 0.0357          | 0.0163   | 0.0805    | 8.8681 | 0.1811            | 27.2030 |
| class. Actinobacteria. id. 419       | LargeArteryStroke   | MR Egger                  | 6    | 0.4555  | 0.1059     | 1.9589     | 0.3503 | 0.0545          | 0.0568   | 0.3912    | 4.9712 | 0.2903            | 5.2681  |
| class. Actinobacteria. id. 419       | LargeArteryStroke   | Weighted median           | 6    | 0.7768  | 0.5123     | 1.1778     | 0.2342 | 0.0545          | 0.0568   | 0.3912    | 4.9712 | 0.2903            | 5.2681  |
| class. Actinobacteria. id. 419       | LargeArteryStroke   | Inverse variance weighted | 6    | 0.9110  | 0.6395     | 1.2977     | 0.6057 | 0.0545          | 0.0568   | 0.3912    | 4.9712 | 0.2903            | 5.2681  |
| class. Actinobacteria. id. 419       | LargeArteryStroke   | Simple mode               | 6    | 0.6568  | 0.3148     | 1.3701     | 0.3134 | 0.0545          | 0.0568   | 0.3912    | 4.9712 | 0.2903            | 5.2681  |
| class. Actinobacteria. id. 419       | LargeArteryStroke   | Weighted mode             | 6    | 0.6635  | 0.3293     | 1.3366     | 0.3029 | 0.0545          | 0.0568   | 0.3912    | 4.9712 | 0.2903            | 5.2681  |
| class. Actinobacteria. id. 419       | SmallVesselStroke   | MR Egger                  | 7    | 0.5992  | 0.1839     | 1.9522     | 0.4341 | 0.0533          | 0.0475   | 0.3132    | 3.5584 | 0.7362            | 11.6537 |
| class. Actinobacteria. id. 419       | SmallVesselStroke   | Weighted median           | 7    | 1.1980  | 0.8308     | 1.7275     | 0.3334 | 0.0533          | 0.0475   | 0.3132    | 3.5584 | 0.7362            | 11.6537 |
| class. Actinobacteria. id. 419       | SmallVesselStroke   | Inverse variance weighted | 7    | 1.1541  | 0.8673     | 1.5359     | 0.3255 | 0.0533          | 0.0475   | 0.3132    | 3.5584 | 0.7362            | 11.6537 |
| class. Actinobacteria. id. 419       | SmallVesselStroke   | Simple mode               | 7    | 1.3122  | 0.7318     | 2.3529     | 0.3970 | 0.0533          | 0.0475   | 0.3132    | 3.5584 | 0.7362            | 11.6537 |
| class. Actinobacteria. id. 419       | SmallVesselStroke   | Weighted mode             | 7    | 1.3122  | 0.7588     | 2.2692     | 0.3685 | 0.0533          | 0.0475   | 0.3132    | 3.5584 | 0.7362            | 11.6537 |
| class. Actinobacteria. id. 419       | Stroke              | MR Egger                  | 7    | 0.6059  | 0.4158     | 0.8829     | 0.0478 | 0.0403          | 0.0150   | 0.0435    | 9.0504 | 0.1708            | 31.4272 |
| class. Actinobacteria. id. 419       | Stroke              | Weighted median           | 7    | 0.9376  | 0.8189     | 1.0736     | 0.3512 | 0.0403          | 0.0150   | 0.0435    | 9.0504 | 0.1708            | 31.4272 |
| class. Actinobacteria. id. 419       | Stroke              | Inverse variance weighted | 7    | 0.9985  | 0.8896     | 1.1207     | 0.9794 | 0.0403          | 0.0150   | 0.0435    | 9.0504 | 0.1708            | 31.4272 |
| class. Actinobacteria. id. 419       | Stroke              | Simple mode               | 7    | 0.9331  | 0.7690     | 1.1322     | 0.5092 | 0.0403          | 0.0150   | 0.0435    | 9.0504 | 0.1708            | 31.4272 |
| class. Actinobacteria. id. 419       | Stroke              | Weighted mode             | 7    | 0.9331  | 0.7852     | 1.1089     | 0.4617 | 0.0403          | 0.0150   | 0.0435    | 9.0504 | 0.1708            | 31.4272 |
| class. Alphaproteobacteria. id. 2379 | CardioEmbolicStroke | MR Egger                  | 3    | 1.2091  | 0.2205     | 6.6288     | 0.8629 | -0.0159         | 0.0708   | 0.8594    | 0.2632 | 0.6080            | 46.3075 |
| class. Alphaproteobacteria. id. 2379 | CardioEmbolicStroke | Weighted median           | 3    | 0.9947  | 0.7049     | 1.4037     | 0.9758 | -0.0159         | 0.0708   | 0.8594    | 0.2632 | 0.6080            | 46.3075 |
| class. Alphaproteobacteria. id. 2379 | CardioEmbolicStroke | Inverse variance weighted | 3    | 0.9978  | 0.7464     | 1.3340     | 0.9883 | -0.0159         | 0.0708   | 0.8594    | 0.2632 | 0.6080            | 46.3075 |
| class. Alphaproteobacteria. id. 2379 | CardioEmbolicStroke | Simple mode               | 3    | 0.9907  | 0.6508     | 1.5079     | 0.9690 | -0.0159         | 0.0708   | 0.8594    | 0.2632 | 0.6080            | 46.3075 |
| class. Alphaproteobacteria. id. 2379 | CardioEmbolicStroke | Weighted mode             | 3    | 0.9856  | 0.6626     | 1.4660     | 0.9495 | -0.0159         | 0.0708   | 0.8594    | 0.2632 | 0.6080            | 46.3075 |
| class. Alphaproteobacteria. id. 2379 | IschemicStroke      | MR Egger                  | 3    | 1.3238  | 0.6456     | 2.7145     | 0.5840 | -0.0190         | 0.0301   | 0.6408    | 0.4081 | 0.8154            | 45.4310 |
| class. Alphaproteobacteria. id. 2379 | IschemicStroke      | Weighted median           | 3    | 1.0559  | 0.9085     | 1.2273     | 0.4782 | -0.0190         | 0.0301   | 0.6408    | 0.4081 | 0.8154            | 45.4310 |
| class. Alphaproteobacteria. id. 2379 | IschemicStroke      | Inverse variance weighted | 3    | 1.0535  | 0.9313     | 1.1917     | 0.4074 | -0.0190         | 0.0301   | 0.6408    | 0.4081 | 0.8154            | 45.4310 |
| class. Alphaproteobacteria. id. 2379 | IschemicStroke      | Simple mode               | 3    | 1.0605  | 0.8886     | 1.2655     | 0.5819 | -0.0190         | 0.0301   | 0.6408    | 0.4081 | 0.8154            | 45.4310 |
| class. Alphaproteobacteria. id. 2379 | IschemicStroke      | Weighted mode             | 3    | 1.0663  | 0.9004     | 1.2626     | 0.5345 | -0.0190         | 0.0301   | 0.6408    | 0.4081 | 0.8154            | 45.4310 |
| class. Alphaproteobacteria. id. 2379 | LargeArteryStroke   | MR Egger                  | 3    | 0.1071  | 0.0015     | 7.6135     | 0.4915 | 0.1809          | 0.1787   | 0.4961    | 7.5230 | 0.0232            | 2.7762  |
| class. Alphaproteobacteria. id. 2379 | LargeArteryStroke   | Weighted median           | 3    | 1.0273  | 0.5530     | 1.9085     | 0.9321 | 0.1809          | 0.1787   | 0.4961    | 7.5230 | 0.0232            | 2.7762  |
| class. Alphaproteobacteria. id. 2379 | LargeArteryStroke   | Inverse variance weighted | 3    | 0.9367  | 0.4446     | 1.9737     | 0.8635 | 0.1809          | 0.1787   | 0.4961    | 7.5230 | 0.0232            | 2.7762  |
| class. Alphaproteobacteria. id. 2379 | LargeArteryStroke   | Simple mode               | 3    | 1.2493  | 0.5261     | 2.9667     | 0.6641 | 0.1809          | 0.1787   | 0.4961    | 7.5230 | 0.0232            | 2.7762  |
| class. Alphaproteobacteria. id. 2379 | LargeArteryStroke   | Weighted mode             | 3    | 1.1711  | 0.4870     | 2.8161     | 0.7579 | 0.1809          | 0.1787   | 0.4961    | 7.5230 | 0.0232            | 2.7762  |
| class. Alphaproteobacteria. id. 2379 | SmallVesselStroke   | MR Egger                  | 3    | 2.0900  | 0.2591     | 16.8555    | 0.6146 | -0.0612         | 0.0873   | 0.6106    | 0.5293 | 0.7675            | 23.8700 |
| class. Alphaproteobacteria. id. 2379 | SmallVesselStroke   | Weighted median           | 3    | 1.0359  | 0.6699     | 1.6019     | 0.8741 | -0.0612         | 0.0873   | 0.6106    | 0.5293 | 0.7675            | 23.8700 |
| class. Alphaproteobacteria. id. 2379 | SmallVesselStroke   | Inverse variance weighted | 3    | 1.0013  | 0.6996     | 1.4331     | 0.9944 | -0.0612         | 0.0873   | 0.6106    | 0.5293 | 0.7675            | 23.8700 |
| class. Alphaproteobacteria. id. 2379 | SmallVesselStroke   | Simple mode               | 3    | 1.0646  | 0.6540     | 1.7331     | 0.8247 | -0.0612         | 0.0873   | 0.6106    | 0.5293 | 0.7675            | 23.8700 |
| class. Alphaproteobacteria. id. 2379 | SmallVesselStroke   | Weighted mode             | 3    | 1.0731  | 0.6394     | 1.8010     | 0.8143 | -0.0612         | 0.0873   | 0.6106    | 0.5293 | 0.7675            | 23.8700 |
| class. Alphaproteobacteria. id. 2379 | Stroke              | MR Egger                  | 3    | 1.5515  | 0.7982     | 3.0160     | 0.4186 | -0.0331         | 0.0278   | 0.4446    | 1.7190 | 0.4234            | 35.6814 |
| class. Alphaproteobacteria. id. 2379 | Stroke              | Weighted median           | 3    | 1.0778  | 0.9300     | 1.2491     | 0.3197 | -0.0331         | 0.0278   | 0.4446    | 1.7190 | 0.4234            | 35.6814 |
| class. Alphaproteobacteria. id. 2379 | Stroke              | Inverse variance weighted | 3    | 1.0421  | 0.9303     | 1.1674     | 0.4760 | -0.0331         | 0.0278   | 0.4446    | 1.7190 | 0.4234            | 35.6814 |
| class. Alphaproteobacteria. id. 2379 | Stroke              | Simple mode               | 3    | 1.0948  | 0.9121     | 1.3141     | 0.4333 | -0.0331         | 0.0278   | 0.4446    | 1.7190 | 0.4234            | 35.6814 |
| class. Alphaproteobacteria. id. 2379 | Stroke              | Weighted mode             | 3    | 1.0966  | 0.9208     | 1.3059     | 0.4096 | -0.0331         | 0.0278   | 0.4446    | 1.7190 | 0.4234            | 35.6814 |
| class. Bacilli. id. 1673             | CardioEmbolicStroke | MR Egger                  | 4    | 17.3805 | 0.9210     | 327.9863   | 0.1971 | -0.2918         | 0.1433   | 0.1787    | 6.1231 | 0.1058            | 6.0265  |

|                                     |                     |                           |   |        |        |         |        |         |        |        |        |        |         |
|-------------------------------------|---------------------|---------------------------|---|--------|--------|---------|--------|---------|--------|--------|--------|--------|---------|
| class. Bacilli. id. 1673            | CardioEmbolicStroke | Weighted median           | 4 | 0.9987 | 0.6559 | 1.5207  | 0.9952 | -0.2918 | 0.1433 | 0.1787 | 6.1231 | 0.1058 | 6.0265  |
| class. Bacilli. id. 1673            | CardioEmbolicStroke | Inverse variance weighted | 4 | 0.8372 | 0.5285 | 1.3262  | 0.4491 | -0.2918 | 0.1433 | 0.1787 | 6.1231 | 0.1058 | 6.0265  |
| class. Bacilli. id. 1673            | CardioEmbolicStroke | Simple mode               | 4 | 1.0596 | 0.6150 | 1.8255  | 0.8482 | -0.2918 | 0.1433 | 0.1787 | 6.1231 | 0.1058 | 6.0265  |
| class. Bacilli. id. 1673            | CardioEmbolicStroke | Weighted mode             | 4 | 1.0736 | 0.6825 | 1.6887  | 0.7788 | -0.2918 | 0.1433 | 0.1787 | 6.1231 | 0.1058 | 6.0265  |
| class. Bacilli. id. 1673            | IschemicStroke      | MR Egger                  | 4 | 1.0035 | 0.1808 | 5.5703  | 0.9971 | -0.0043 | 0.0843 | 0.9636 | 3.4814 | 0.1754 | 25.3999 |
| class. Bacilli. id. 1673            | IschemicStroke      | Weighted median           | 4 | 0.9453 | 0.7895 | 1.1318  | 0.5403 | -0.0043 | 0.0843 | 0.9636 | 3.4814 | 0.1754 | 25.3999 |
| class. Bacilli. id. 1673            | IschemicStroke      | Inverse variance weighted | 4 | 0.9596 | 0.8252 | 1.1158  | 0.5916 | -0.0043 | 0.0843 | 0.9636 | 3.4814 | 0.1754 | 25.3999 |
| class. Bacilli. id. 1673            | IschemicStroke      | Simple mode               | 4 | 0.8893 | 0.6781 | 1.1663  | 0.4588 | -0.0043 | 0.0843 | 0.9636 | 3.4814 | 0.1754 | 25.3999 |
| class. Bacilli. id. 1673            | IschemicStroke      | Weighted mode             | 4 | 0.8925 | 0.6670 | 1.1942  | 0.4996 | -0.0043 | 0.0843 | 0.9636 | 3.4814 | 0.1754 | 25.3999 |
| class. Bacilli. id. 1673            | LargeArteryStroke   | MR Egger                  | 4 | 0.1022 | 0.0024 | 4.3166  | 0.3548 | 0.1793  | 0.1811 | 0.4265 | 1.6002 | 0.6594 | 4.0978  |
| class. Bacilli. id. 1673            | LargeArteryStroke   | Weighted median           | 4 | 0.6792 | 0.4051 | 1.1388  | 0.1424 | 0.1793  | 0.1811 | 0.4265 | 1.6002 | 0.6594 | 4.0978  |
| class. Bacilli. id. 1673            | LargeArteryStroke   | Inverse variance weighted | 4 | 0.6688 | 0.4382 | 1.0206  | 0.0621 | 0.1793  | 0.1811 | 0.4265 | 1.6002 | 0.6594 | 4.0978  |
| class. Bacilli. id. 1673            | LargeArteryStroke   | Simple mode               | 4 | 0.6779 | 0.3343 | 1.3747  | 0.3601 | 0.1793  | 0.1811 | 0.4265 | 1.6002 | 0.6594 | 4.0978  |
| class. Bacilli. id. 1673            | LargeArteryStroke   | Weighted mode             | 4 | 0.6887 | 0.3328 | 1.4250  | 0.3888 | 0.1793  | 0.1811 | 0.4265 | 1.6002 | 0.6594 | 4.0978  |
| class. Bacilli. id. 1673            | SmallVesselStroke   | MR Egger                  | 4 | 0.1257 | 0.0033 | 4.7323  | 0.3791 | 0.2279  | 0.1762 | 0.3251 | 1.6914 | 0.6389 | 7.2417  |
| class. Bacilli. id. 1673            | SmallVesselStroke   | Weighted median           | 4 | 1.2143 | 0.7431 | 1.9842  | 0.4384 | 0.2279  | 0.1762 | 0.3251 | 1.6914 | 0.6389 | 7.2417  |
| class. Bacilli. id. 1673            | SmallVesselStroke   | Inverse variance weighted | 4 | 1.3573 | 0.9036 | 2.0387  | 0.1411 | 0.2279  | 0.1762 | 0.3251 | 1.6914 | 0.6389 | 7.2417  |
| class. Bacilli. id. 1673            | SmallVesselStroke   | Simple mode               | 4 | 1.1475 | 0.6096 | 2.1599  | 0.6986 | 0.2279  | 0.1762 | 0.3251 | 1.6914 | 0.6389 | 7.2417  |
| class. Bacilli. id. 1673            | SmallVesselStroke   | Weighted mode             | 4 | 1.1534 | 0.6116 | 2.1750  | 0.6891 | 0.2279  | 0.1762 | 0.3251 | 1.6914 | 0.6389 | 7.2417  |
| class. Bacilli. id. 1673            | Stroke              | MR Egger                  | 4 | 1.0502 | 0.1516 | 7.2740  | 0.9649 | -0.0103 | 0.0952 | 0.9234 | 5.2272 | 0.0733 | 21.0836 |
| class. Bacilli. id. 1673            | Stroke              | Weighted median           | 4 | 0.9499 | 0.8012 | 1.1262  | 0.5540 | -0.0103 | 0.0952 | 0.9234 | 5.2272 | 0.0733 | 21.0836 |
| class. Bacilli. id. 1673            | Stroke              | Inverse variance weighted | 4 | 0.9440 | 0.7958 | 1.1199  | 0.5086 | -0.0103 | 0.0952 | 0.9234 | 5.2272 | 0.0733 | 21.0836 |
| class. Bacilli. id. 1673            | Stroke              | Simple mode               | 4 | 0.8549 | 0.6335 | 1.1536  | 0.3807 | -0.0103 | 0.0952 | 0.9234 | 5.2272 | 0.0733 | 21.0836 |
| class. Bacilli. id. 1673            | Stroke              | Weighted mode             | 4 | 1.0381 | 0.7864 | 1.3704  | 0.8089 | -0.0103 | 0.0952 | 0.9234 | 5.2272 | 0.0733 | 21.0836 |
| class. Bacteroidia. id. 912         | CardioEmbolicStroke | MR Egger                  | 3 | 1.6236 | 0.5736 | 4.5958  | 0.5289 | -0.0358 | 0.0365 | 0.5062 | 1.2936 | 0.5237 | 11.4267 |
| class. Bacteroidia. id. 912         | CardioEmbolicStroke | Weighted median           | 3 | 0.9580 | 0.6079 | 1.5097  | 0.8531 | -0.0358 | 0.0365 | 0.5062 | 1.2936 | 0.5237 | 11.4267 |
| class. Bacteroidia. id. 912         | CardioEmbolicStroke | Inverse variance weighted | 3 | 0.9970 | 0.6926 | 1.4351  | 0.9871 | -0.0358 | 0.0365 | 0.5062 | 1.2936 | 0.5237 | 11.4267 |
| class. Bacteroidia. id. 912         | CardioEmbolicStroke | Simple mode               | 3 | 0.8904 | 0.5043 | 1.5721  | 0.7277 | -0.0358 | 0.0365 | 0.5062 | 1.2936 | 0.5237 | 11.4267 |
| class. Bacteroidia. id. 912         | CardioEmbolicStroke | Weighted mode             | 3 | 0.8904 | 0.5201 | 1.5244  | 0.7133 | -0.0358 | 0.0365 | 0.5062 | 1.2936 | 0.5237 | 11.4267 |
| class. Bacteroidia. id. 912         | IschemicStroke      | MR Egger                  | 3 | 1.3098 | 0.6695 | 2.5626  | 0.5751 | -0.0059 | 0.0240 | 0.8467 | 2.3192 | 0.1278 | 11.2137 |
| class. Bacteroidia. id. 912         | IschemicStroke      | Weighted median           | 3 | 1.2486 | 1.0138 | 1.5378  | 0.0367 | -0.0059 | 0.0240 | 0.8467 | 2.3192 | 0.1278 | 11.2137 |
| class. Bacteroidia. id. 912         | IschemicStroke      | Inverse variance weighted | 3 | 1.2111 | 1.0153 | 1.4446  | 0.0333 | -0.0059 | 0.0240 | 0.8467 | 2.3192 | 0.1278 | 11.2137 |
| class. Bacteroidia. id. 912         | IschemicStroke      | Simple mode               | 3 | 1.3252 | 0.9993 | 1.7574  | 0.1898 | -0.0059 | 0.0240 | 0.8467 | 2.3192 | 0.1278 | 11.2137 |
| class. Bacteroidia. id. 912         | IschemicStroke      | Weighted mode             | 3 | 1.3168 | 0.9890 | 1.7532  | 0.2002 | -0.0059 | 0.0240 | 0.8467 | 2.3192 | 0.1278 | 11.2137 |
| class. Bacteroidia. id. 912         | LargeArteryStroke   | MR Egger                  | 3 | 2.8821 | 0.3788 | 21.9275 | 0.4929 | -0.0759 | 0.0709 | 0.4782 | 4.4724 | 0.1069 | 4.3292  |
| class. Bacteroidia. id. 912         | LargeArteryStroke   | Weighted median           | 3 | 1.3762 | 0.7127 | 2.6572  | 0.3415 | -0.0759 | 0.0709 | 0.4782 | 4.4724 | 0.1069 | 4.3292  |
| class. Bacteroidia. id. 912         | LargeArteryStroke   | Inverse variance weighted | 3 | 1.0195 | 0.4896 | 2.1229  | 0.9588 | -0.0759 | 0.0709 | 0.4782 | 4.4724 | 0.1069 | 4.3292  |
| class. Bacteroidia. id. 912         | LargeArteryStroke   | Simple mode               | 3 | 1.4401 | 0.6316 | 3.2832  | 0.4772 | -0.0759 | 0.0709 | 0.4782 | 4.4724 | 0.1069 | 4.3292  |
| class. Bacteroidia. id. 912         | LargeArteryStroke   | Weighted mode             | 3 | 1.4457 | 0.6367 | 3.2824  | 0.4712 | -0.0759 | 0.0709 | 0.4782 | 4.4724 | 0.1069 | 4.3292  |
| class. Bacteroidia. id. 912         | SmallVesselStroke   | MR Egger                  | 3 | 1.9860 | 0.4305 | 9.1626  | 0.5407 | -0.0484 | 0.0532 | 0.5300 | 1.3205 | 0.2505 | 5.5711  |
| class. Bacteroidia. id. 912         | SmallVesselStroke   | Weighted median           | 3 | 1.1022 | 0.5871 | 2.0694  | 0.7620 | -0.0484 | 0.0532 | 0.5300 | 1.3205 | 0.2505 | 5.5711  |
| class. Bacteroidia. id. 912         | SmallVesselStroke   | Inverse variance weighted | 3 | 1.0199 | 0.6163 | 1.6879  | 0.9389 | -0.0484 | 0.0532 | 0.5300 | 1.3205 | 0.2505 | 5.5711  |
| class. Bacteroidia. id. 912         | SmallVesselStroke   | Simple mode               | 3 | 1.1952 | 0.5388 | 2.6512  | 0.7038 | -0.0484 | 0.0532 | 0.5300 | 1.3205 | 0.2505 | 5.5711  |
| class. Bacteroidia. id. 912         | SmallVesselStroke   | Weighted mode             | 3 | 1.2213 | 0.5462 | 2.7311  | 0.6744 | -0.0484 | 0.0532 | 0.5300 | 1.3205 | 0.2505 | 5.5711  |
| class. Bacteroidia. id. 912         | Stroke              | MR Egger                  | 3 | 1.1137 | 0.6883 | 1.8021  | 0.7368 | 0.0005  | 0.0172 | 0.9821 | 1.4058 | 0.2358 | 23.7656 |
| class. Bacteroidia. id. 912         | Stroke              | Weighted median           | 3 | 1.1247 | 0.9327 | 1.3564  | 0.2185 | 0.0005  | 0.0172 | 0.9821 | 1.4058 | 0.2358 | 23.7656 |
| class. Bacteroidia. id. 912         | Stroke              | Inverse variance weighted | 3 | 1.1209 | 0.9684 | 1.2973  | 0.1260 | 0.0005  | 0.0172 | 0.9821 | 1.4058 | 0.2358 | 23.7656 |
| class. Bacteroidia. id. 912         | Stroke              | Simple mode               | 3 | 1.1668 | 0.9276 | 1.4677  | 0.3183 | 0.0005  | 0.0172 | 0.9821 | 1.4058 | 0.2358 | 23.7656 |
| class. Bacteroidia. id. 912         | Stroke              | Weighted mode             | 3 | 1.1456 | 0.9303 | 1.4108  | 0.3290 | 0.0005  | 0.0172 | 0.9821 | 1.4058 | 0.2358 | 23.7656 |
| class. Betaproteobacteria. id. 2867 | CardioEmbolicStroke | MR Egger                  | 3 | 1.1455 | 0.4588 | 2.8599  | 0.8198 | -0.0046 | 0.0320 | 0.9084 | 0.0329 | 0.8560 | 38.7029 |
| class. Betaproteobacteria. id. 2867 | CardioEmbolicStroke | Weighted median           | 3 | 1.0947 | 0.7422 | 1.6148  | 0.6481 | -0.0046 | 0.0320 | 0.9084 | 0.0329 | 0.8560 | 38.7029 |
| class. Betaproteobacteria. id. 2867 | CardioEmbolicStroke | Inverse variance weighted | 3 | 1.0757 | 0.7669 | 1.5088  | 0.6726 | -0.0046 | 0.0320 | 0.9084 | 0.0329 | 0.8560 | 38.7029 |
| class. Betaproteobacteria. id. 2867 | CardioEmbolicStroke | Simple mode               | 3 | 1.1037 | 0.7139 | 1.7063  | 0.7006 | -0.0046 | 0.0320 | 0.9084 | 0.0329 | 0.8560 | 38.7029 |
| class. Betaproteobacteria. id. 2867 | CardioEmbolicStroke | Weighted mode             | 3 | 1.1023 | 0.6892 | 1.7631  | 0.7238 | -0.0046 | 0.0320 | 0.9084 | 0.0329 | 0.8560 | 38.7029 |

|                                     |                     |                           |   |        |        |         |        |         |        |        |        |        |         |
|-------------------------------------|---------------------|---------------------------|---|--------|--------|---------|--------|---------|--------|--------|--------|--------|---------|
| class. Betaproteobacteria. id. 2867 | IschemicStroke      | MR Egger                  | 3 | 1.0594 | 0.7128 | 1.5744  | 0.8230 | 0.0009  | 0.0139 | 0.9592 | 0.3564 | 0.5505 | 43.4135 |
| class. Betaproteobacteria. id. 2867 | IschemicStroke      | Weighted median           | 3 | 1.0798 | 0.9042 | 1.2896  | 0.3964 | 0.0009  | 0.0139 | 0.9592 | 0.3564 | 0.5505 | 43.4135 |
| class. Betaproteobacteria. id. 2867 | IschemicStroke      | Inverse variance weighted | 3 | 1.0722 | 0.9252 | 1.2426  | 0.3540 | 0.0009  | 0.0139 | 0.9592 | 0.3564 | 0.5505 | 43.4135 |
| class. Betaproteobacteria. id. 2867 | IschemicStroke      | Simple mode               | 3 | 1.0988 | 0.8936 | 1.3512  | 0.4659 | 0.0009  | 0.0139 | 0.9592 | 0.3564 | 0.5505 | 43.4135 |
| class. Betaproteobacteria. id. 2867 | IschemicStroke      | Weighted mode             | 3 | 1.0917 | 0.9031 | 1.3199  | 0.4603 | 0.0009  | 0.0139 | 0.9592 | 0.3564 | 0.5505 | 43.4135 |
| class. Betaproteobacteria. id. 2867 | LargeArteryStroke   | MR Egger                  | 3 | 0.4132 | 0.1231 | 1.3872  | 0.3884 | 0.0505  | 0.0423 | 0.4437 | 2.3422 | 0.3100 | 3.4816  |
| class. Betaproteobacteria. id. 2867 | LargeArteryStroke   | Weighted median           | 3 | 0.8864 | 0.4928 | 1.5945  | 0.6873 | 0.0505  | 0.0423 | 0.4437 | 2.3422 | 0.3100 | 3.4816  |
| class. Betaproteobacteria. id. 2867 | LargeArteryStroke   | Inverse variance weighted | 3 | 0.8208 | 0.5066 | 1.3298  | 0.4224 | 0.0505  | 0.0423 | 0.4437 | 2.3422 | 0.3100 | 3.4816  |
| class. Betaproteobacteria. id. 2867 | LargeArteryStroke   | Simple mode               | 3 | 0.9930 | 0.4711 | 2.0934  | 0.9870 | 0.0505  | 0.0423 | 0.4437 | 2.3422 | 0.3100 | 3.4816  |
| class. Betaproteobacteria. id. 2867 | LargeArteryStroke   | Weighted mode             | 3 | 0.9981 | 0.4543 | 2.1927  | 0.9966 | 0.0505  | 0.0423 | 0.4437 | 2.3422 | 0.3100 | 3.4816  |
| class. Betaproteobacteria. id. 2867 | SmallVesselStroke   | MR Egger                  | 3 | 0.9258 | 0.2825 | 3.0338  | 0.9194 | -0.0050 | 0.0407 | 0.9228 | 0.0825 | 0.7739 | 21.5944 |
| class. Betaproteobacteria. id. 2867 | SmallVesselStroke   | Weighted median           | 3 | 0.8725 | 0.5361 | 1.4201  | 0.5831 | -0.0050 | 0.0407 | 0.9228 | 0.0825 | 0.7739 | 21.5944 |
| class. Betaproteobacteria. id. 2867 | SmallVesselStroke   | Inverse variance weighted | 3 | 0.8642 | 0.5646 | 1.3230  | 0.5018 | -0.0050 | 0.0407 | 0.9228 | 0.0825 | 0.7739 | 21.5944 |
| class. Betaproteobacteria. id. 2867 | SmallVesselStroke   | Simple mode               | 3 | 0.8846 | 0.4883 | 1.6025  | 0.7251 | -0.0050 | 0.0407 | 0.9228 | 0.0825 | 0.7739 | 21.5944 |
| class. Betaproteobacteria. id. 2867 | SmallVesselStroke   | Weighted mode             | 3 | 0.8846 | 0.5099 | 1.5347  | 0.7053 | -0.0050 | 0.0407 | 0.9228 | 0.0825 | 0.7739 | 21.5944 |
| class. Betaproteobacteria. id. 2867 | Stroke              | MR Egger                  | 3 | 0.9492 | 0.6538 | 1.3780  | 0.8296 | 0.0087  | 0.0131 | 0.6273 | 1.0365 | 0.3086 | 50.7902 |
| class. Betaproteobacteria. id. 2867 | Stroke              | Weighted median           | 3 | 1.0344 | 0.8678 | 1.2329  | 0.7061 | 0.0087  | 0.0131 | 0.6273 | 1.0365 | 0.3086 | 50.7902 |
| class. Betaproteobacteria. id. 2867 | Stroke              | Inverse variance weighted | 3 | 1.0671 | 0.9316 | 1.2223  | 0.3485 | 0.0087  | 0.0131 | 0.6273 | 1.0365 | 0.3086 | 50.7902 |
| class. Betaproteobacteria. id. 2867 | Stroke              | Simple mode               | 3 | 1.0125 | 0.8244 | 1.2434  | 0.9167 | 0.0087  | 0.0131 | 0.6273 | 1.0365 | 0.3086 | 50.7902 |
| class. Betaproteobacteria. id. 2867 | Stroke              | Weighted mode             | 3 | 1.0159 | 0.8231 | 1.2538  | 0.8968 | 0.0087  | 0.0131 | 0.6273 | 1.0365 | 0.3086 | 50.7902 |
| class. Clostridia. id. 1859         | CardioEmbolicStroke | MR Egger                  | 4 | 0.9175 | 0.0893 | 9.4261  | 0.9489 | 0.0035  | 0.0671 | 0.9633 | 3.9545 | 0.1384 | 8.0612  |
| class. Clostridia. id. 1859         | CardioEmbolicStroke | Weighted median           | 4 | 0.8709 | 0.5513 | 1.3757  | 0.5534 | 0.0035  | 0.0671 | 0.9633 | 3.9545 | 0.1384 | 8.0612  |
| class. Clostridia. id. 1859         | CardioEmbolicStroke | Inverse variance weighted | 4 | 0.9745 | 0.6427 | 1.4778  | 0.9033 | 0.0035  | 0.0671 | 0.9633 | 3.9545 | 0.1384 | 8.0612  |
| class. Clostridia. id. 1859         | CardioEmbolicStroke | Simple mode               | 4 | 0.7977 | 0.3968 | 1.6038  | 0.5710 | 0.0035  | 0.0671 | 0.9633 | 3.9545 | 0.1384 | 8.0612  |
| class. Clostridia. id. 1859         | CardioEmbolicStroke | Weighted mode             | 4 | 0.7977 | 0.3954 | 1.6093  | 0.5727 | 0.0035  | 0.0671 | 0.9633 | 3.9545 | 0.1384 | 8.0612  |
| class. Clostridia. id. 1859         | IschemicStroke      | MR Egger                  | 4 | 0.7735 | 0.3768 | 1.5880  | 0.5565 | 0.0051  | 0.0207 | 0.8283 | 0.1335 | 0.9354 | 14.2378 |
| class. Clostridia. id. 1859         | IschemicStroke      | Weighted median           | 4 | 0.8483 | 0.7061 | 1.0190  | 0.0786 | 0.0051  | 0.0207 | 0.8283 | 0.1335 | 0.9354 | 14.2378 |
| class. Clostridia. id. 1859         | IschemicStroke      | Inverse variance weighted | 4 | 0.8450 | 0.7230 | 0.9875  | 0.0342 | 0.0051  | 0.0207 | 0.8283 | 0.1335 | 0.9354 | 14.2378 |
| class. Clostridia. id. 1859         | IschemicStroke      | Simple mode               | 4 | 0.8178 | 0.6353 | 1.0527  | 0.2164 | 0.0051  | 0.0207 | 0.8283 | 0.1335 | 0.9354 | 14.2378 |
| class. Clostridia. id. 1859         | IschemicStroke      | Weighted mode             | 4 | 0.8703 | 0.6821 | 1.1105  | 0.3454 | 0.0051  | 0.0207 | 0.8283 | 0.1335 | 0.9354 | 14.2378 |
| class. Clostridia. id. 1859         | LargeArteryStroke   | MR Egger                  | 4 | 3.4183 | 0.3708 | 31.5165 | 0.3915 | -0.0714 | 0.0642 | 0.3818 | 1.6889 | 0.6394 | 5.2394  |
| class. Clostridia. id. 1859         | LargeArteryStroke   | Weighted median           | 4 | 0.8900 | 0.4959 | 1.5974  | 0.6961 | -0.0714 | 0.0642 | 0.3818 | 1.6889 | 0.6394 | 5.2394  |
| class. Clostridia. id. 1859         | LargeArteryStroke   | Inverse variance weighted | 4 | 1.0000 | 0.6112 | 1.6361  | 0.9998 | -0.0714 | 0.0642 | 0.3818 | 1.6889 | 0.6394 | 5.2394  |
| class. Clostridia. id. 1859         | LargeArteryStroke   | Simple mode               | 4 | 0.8027 | 0.3501 | 1.8404  | 0.6395 | -0.0714 | 0.0642 | 0.3818 | 1.6889 | 0.6394 | 5.2394  |
| class. Clostridia. id. 1859         | LargeArteryStroke   | Weighted mode             | 4 | 0.7858 | 0.3567 | 1.7308  | 0.5917 | -0.0714 | 0.0642 | 0.3818 | 1.6889 | 0.6394 | 5.2394  |
| class. Clostridia. id. 1859         | SmallVesselStroke   | MR Egger                  | 4 | 2.9151 | 0.3036 | 27.9922 | 0.4518 | -0.0909 | 0.0652 | 0.2983 | 4.8042 | 0.1867 | 2.7878  |
| class. Clostridia. id. 1859         | SmallVesselStroke   | Weighted median           | 4 | 0.6886 | 0.3828 | 1.2388  | 0.2130 | -0.0909 | 0.0652 | 0.2983 | 4.8042 | 0.1867 | 2.7878  |
| class. Clostridia. id. 1859         | SmallVesselStroke   | Inverse variance weighted | 4 | 0.6075 | 0.3439 | 1.0733  | 0.0861 | -0.0909 | 0.0652 | 0.2983 | 4.8042 | 0.1867 | 2.7878  |
| class. Clostridia. id. 1859         | SmallVesselStroke   | Simple mode               | 4 | 0.8758 | 0.3283 | 2.3368  | 0.8083 | -0.0909 | 0.0652 | 0.2983 | 4.8042 | 0.1867 | 2.7878  |
| class. Clostridia. id. 1859         | SmallVesselStroke   | Weighted mode             | 4 | 0.8950 | 0.3663 | 2.1866  | 0.8233 | -0.0909 | 0.0652 | 0.2983 | 4.8042 | 0.1867 | 2.7878  |
| class. Clostridia. id. 1859         | Stroke              | MR Egger                  | 4 | 0.8653 | 0.4478 | 1.6722  | 0.7088 | -0.0022 | 0.0190 | 0.9195 | 0.2467 | 0.8840 | 14.7923 |
| class. Clostridia. id. 1859         | Stroke              | Weighted median           | 4 | 0.8330 | 0.7055 | 0.9835  | 0.0311 | -0.0022 | 0.0190 | 0.9195 | 0.2467 | 0.8840 | 14.7923 |
| class. Clostridia. id. 1859         | Stroke              | Inverse variance weighted | 4 | 0.8335 | 0.7217 | 0.9625  | 0.0131 | -0.0022 | 0.0190 | 0.9195 | 0.2467 | 0.8840 | 14.7923 |
| class. Clostridia. id. 1859         | Stroke              | Simple mode               | 4 | 0.8191 | 0.6540 | 1.0258  | 0.1806 | -0.0022 | 0.0190 | 0.9195 | 0.2467 | 0.8840 | 14.7923 |
| class. Clostridia. id. 1859         | Stroke              | Weighted mode             | 4 | 0.8235 | 0.6623 | 1.0240  | 0.1790 | -0.0022 | 0.0190 | 0.9195 | 0.2467 | 0.8840 | 14.7923 |
| class. Coriobacteriia. id. 809      | CardioEmbolicStroke | MR Egger                  | 4 | 0.3803 | 0.0776 | 1.8624  | 0.3553 | 0.0758  | 0.0677 | 0.3790 | 1.9272 | 0.5877 | 11.8413 |
| class. Coriobacteriia. id. 809      | CardioEmbolicStroke | Weighted median           | 4 | 0.8838 | 0.5946 | 1.3136  | 0.5412 | 0.0758  | 0.0677 | 0.3790 | 1.9272 | 0.5877 | 11.8413 |
| class. Coriobacteriia. id. 809      | CardioEmbolicStroke | Inverse variance weighted | 4 | 0.9244 | 0.6640 | 1.2868  | 0.6413 | 0.0758  | 0.0677 | 0.3790 | 1.9272 | 0.5877 | 11.8413 |
| class. Coriobacteriia. id. 809      | CardioEmbolicStroke | Simple mode               | 4 | 0.8390 | 0.4787 | 1.4705  | 0.5832 | 0.0758  | 0.0677 | 0.3790 | 1.9272 | 0.5877 | 11.8413 |
| class. Coriobacteriia. id. 809      | CardioEmbolicStroke | Weighted mode             | 4 | 0.8463 | 0.4817 | 1.4867  | 0.6022 | 0.0758  | 0.0677 | 0.3790 | 1.9272 | 0.5877 | 11.8413 |
| class. Coriobacteriia. id. 809      | IschemicStroke      | MR Egger                  | 4 | 1.1748 | 0.3547 | 3.8912  | 0.8167 | -0.0155 | 0.0511 | 0.7904 | 5.9981 | 0.0498 | 16.1116 |
| class. Coriobacteriia. id. 809      | IschemicStroke      | Weighted median           | 4 | 0.9805 | 0.8076 | 1.1904  | 0.8426 | -0.0155 | 0.0511 | 0.7904 | 5.9981 | 0.0498 | 16.1116 |
| class. Coriobacteriia. id. 809      | IschemicStroke      | Inverse variance weighted | 4 | 0.9802 | 0.7945 | 1.2093  | 0.8519 | -0.0155 | 0.0511 | 0.7904 | 5.9981 | 0.0498 | 16.1116 |
| class. Coriobacteriia. id. 809      | IschemicStroke      | Simple mode               | 4 | 0.9703 | 0.7001 | 1.3448  | 0.8679 | -0.0155 | 0.0511 | 0.7904 | 5.9981 | 0.0498 | 16.1116 |

|                                   |                     |                           |   |        |        |           |        |         |        |        |        |        |         |
|-----------------------------------|---------------------|---------------------------|---|--------|--------|-----------|--------|---------|--------|--------|--------|--------|---------|
| class.Coriobacteriia.id.809       | IschemicStroke      | Weighted mode             | 4 | 0.9783 | 0.7156 | 1.3376    | 0.8995 | -0.0155 | 0.0511 | 0.7904 | 5.9981 | 0.0498 | 16.1116 |
| class.Coriobacteriia.id.809       | LargeArteryStroke   | MR Egger                  | 4 | 2.3036 | 0.2502 | 21.2109   | 0.5380 | -0.0637 | 0.0948 | 0.5708 | 2.0279 | 0.3628 | 5.8616  |
| class.Coriobacteriia.id.809       | LargeArteryStroke   | Weighted median           | 4 | 1.0872 | 0.6348 | 1.8619    | 0.7608 | -0.0637 | 0.0948 | 0.5708 | 2.0279 | 0.3628 | 5.8616  |
| class.Coriobacteriia.id.809       | LargeArteryStroke   | Inverse variance weighted | 4 | 1.0936 | 0.6956 | 1.7193    | 0.6984 | -0.0637 | 0.0948 | 0.5708 | 2.0279 | 0.3628 | 5.8616  |
| class.Coriobacteriia.id.809       | LargeArteryStroke   | Simple mode               | 4 | 1.0989 | 0.4993 | 2.4187    | 0.8298 | -0.0637 | 0.0948 | 0.5708 | 2.0279 | 0.3628 | 5.8616  |
| class.Coriobacteriia.id.809       | LargeArteryStroke   | Weighted mode             | 4 | 1.0989 | 0.5108 | 2.3643    | 0.8249 | -0.0637 | 0.0948 | 0.5708 | 2.0279 | 0.3628 | 5.8616  |
| class.Coriobacteriia.id.809       | SmallVesselStroke   | MR Egger                  | 4 | 1.8133 | 0.2532 | 12.9886   | 0.6136 | -0.0733 | 0.0833 | 0.4718 | 0.8258 | 0.8433 | 10.3831 |
| class.Coriobacteriia.id.809       | SmallVesselStroke   | Weighted median           | 4 | 0.7899 | 0.4942 | 1.2626    | 0.3244 | -0.0733 | 0.0833 | 0.4718 | 0.8258 | 0.8433 | 10.3831 |
| class.Coriobacteriia.id.809       | SmallVesselStroke   | Inverse variance weighted | 4 | 0.7642 | 0.5059 | 1.1543    | 0.2012 | -0.0733 | 0.0833 | 0.4718 | 0.8258 | 0.8433 | 10.3831 |
| class.Coriobacteriia.id.809       | SmallVesselStroke   | Simple mode               | 4 | 0.8208 | 0.4283 | 1.5730    | 0.5937 | -0.0733 | 0.0833 | 0.4718 | 0.8258 | 0.8433 | 10.3831 |
| class.Coriobacteriia.id.809       | SmallVesselStroke   | Weighted mode             | 4 | 0.8386 | 0.4438 | 1.5846    | 0.6254 | -0.0733 | 0.0833 | 0.4718 | 0.8258 | 0.8433 | 10.3831 |
| class.Coriobacteriia.id.809       | Stroke              | MR Egger                  | 4 | 1.1884 | 0.2890 | 4.8869    | 0.8332 | -0.0145 | 0.0600 | 0.8313 | 9.8865 | 0.0071 | 12.7061 |
| class.Coriobacteriia.id.809       | Stroke              | Weighted median           | 4 | 0.9793 | 0.8172 | 1.1735    | 0.8208 | -0.0145 | 0.0600 | 0.8313 | 9.8865 | 0.0071 | 12.7061 |
| class.Coriobacteriia.id.809       | Stroke              | Inverse variance weighted | 4 | 1.0019 | 0.7830 | 1.2820    | 0.9879 | -0.0145 | 0.0600 | 0.8313 | 9.8865 | 0.0071 | 12.7061 |
| class.Coriobacteriia.id.809       | Stroke              | Simple mode               | 4 | 0.9037 | 0.6215 | 1.3141    | 0.6329 | -0.0145 | 0.0600 | 0.8313 | 9.8865 | 0.0071 | 12.7061 |
| class.Coriobacteriia.id.809       | Stroke              | Weighted mode             | 4 | 0.9300 | 0.6700 | 1.2909    | 0.6937 | -0.0145 | 0.0600 | 0.8313 | 9.8865 | 0.0071 | 12.7061 |
| class.Deltaproteobacteria.id.3087 | CardioEmbolicStroke | MR Egger                  | 4 | 0.1581 | 0.0249 | 1.0028    | 0.1895 | 0.0913  | 0.0557 | 0.2427 | 3.6842 | 0.2976 | 3.4062  |
| class.Deltaproteobacteria.id.3087 | CardioEmbolicStroke | Weighted median           | 4 | 0.7424 | 0.4969 | 1.1091    | 0.1459 | 0.0913  | 0.0557 | 0.2427 | 3.6842 | 0.2976 | 3.4062  |
| class.Deltaproteobacteria.id.3087 | CardioEmbolicStroke | Inverse variance weighted | 4 | 0.7268 | 0.5239 | 1.0083    | 0.0561 | 0.0913  | 0.0557 | 0.2427 | 3.6842 | 0.2976 | 3.4062  |
| class.Deltaproteobacteria.id.3087 | CardioEmbolicStroke | Simple mode               | 4 | 0.7406 | 0.4116 | 1.3324    | 0.3901 | 0.0913  | 0.0557 | 0.2427 | 3.6842 | 0.2976 | 3.4062  |
| class.Deltaproteobacteria.id.3087 | CardioEmbolicStroke | Weighted mode             | 4 | 0.7561 | 0.4203 | 1.3604    | 0.4197 | 0.0913  | 0.0557 | 0.2427 | 3.6842 | 0.2976 | 3.4062  |
| class.Deltaproteobacteria.id.3087 | IschemicStroke      | MR Egger                  | 4 | 0.1499 | 0.0201 | 1.1177    | 0.2053 | 0.1066  | 0.0609 | 0.2220 | #####  | 0.0000 | 4.1400  |
| class.Deltaproteobacteria.id.3087 | IschemicStroke      | Weighted median           | 4 | 0.9094 | 0.7375 | 1.1215    | 0.3747 | 0.1066  | 0.0609 | 0.2220 | #####  | 0.0000 | 4.1400  |
| class.Deltaproteobacteria.id.3087 | IschemicStroke      | Inverse variance weighted | 4 | 0.8808 | 0.5740 | 1.3514    | 0.5611 | 0.1066  | 0.0609 | 0.2220 | #####  | 0.0000 | 4.1400  |
| class.Deltaproteobacteria.id.3087 | IschemicStroke      | Simple mode               | 4 | 0.8455 | 0.5489 | 1.3024    | 0.5019 | 0.1066  | 0.0609 | 0.2220 | #####  | 0.0000 | 4.1400  |
| class.Deltaproteobacteria.id.3087 | IschemicStroke      | Weighted mode             | 4 | 0.9118 | 0.6549 | 1.2693    | 0.6223 | 0.1066  | 0.0609 | 0.2220 | #####  | 0.0000 | 4.1400  |
| class.Deltaproteobacteria.id.3087 | LargeArteryStroke   | MR Egger                  | 4 | 1.0776 | 0.0369 | 31.5006   | 0.9693 | -0.0033 | 0.1017 | 0.9772 | 3.7326 | 0.1547 | 5.9028  |
| class.Deltaproteobacteria.id.3087 | LargeArteryStroke   | Weighted median           | 4 | 1.1068 | 0.6626 | 1.8486    | 0.6984 | -0.0033 | 0.1017 | 0.9772 | 3.7326 | 0.1547 | 5.9028  |
| class.Deltaproteobacteria.id.3087 | LargeArteryStroke   | Inverse variance weighted | 4 | 1.0202 | 0.6567 | 1.5850    | 0.9291 | -0.0033 | 0.1017 | 0.9772 | 3.7326 | 0.1547 | 5.9028  |
| class.Deltaproteobacteria.id.3087 | LargeArteryStroke   | Simple mode               | 4 | 1.1845 | 0.6007 | 2.3359    | 0.6585 | -0.0033 | 0.1017 | 0.9772 | 3.7326 | 0.1547 | 5.9028  |
| class.Deltaproteobacteria.id.3087 | LargeArteryStroke   | Weighted mode             | 4 | 1.1679 | 0.6118 | 2.2296    | 0.6701 | -0.0033 | 0.1017 | 0.9772 | 3.7326 | 0.1547 | 5.9028  |
| class.Deltaproteobacteria.id.3087 | SmallVesselStroke   | MR Egger                  | 4 | 0.1584 | 0.0013 | 19.7612   | 0.5323 | 0.1125  | 0.1453 | 0.5198 | #####  | 0.0105 | 2.5678  |
| class.Deltaproteobacteria.id.3087 | SmallVesselStroke   | Weighted median           | 4 | 0.7831 | 0.4851 | 1.2640    | 0.3168 | 0.1125  | 0.1453 | 0.5198 | #####  | 0.0105 | 2.5678  |
| class.Deltaproteobacteria.id.3087 | SmallVesselStroke   | Inverse variance weighted | 4 | 1.0399 | 0.5080 | 2.1285    | 0.9148 | 0.1125  | 0.1453 | 0.5198 | #####  | 0.0105 | 2.5678  |
| class.Deltaproteobacteria.id.3087 | SmallVesselStroke   | Simple mode               | 4 | 0.7319 | 0.3997 | 1.3401    | 0.3863 | 0.1125  | 0.1453 | 0.5198 | #####  | 0.0105 | 2.5678  |
| class.Deltaproteobacteria.id.3087 | SmallVesselStroke   | Weighted mode             | 4 | 0.7197 | 0.4294 | 1.2064    | 0.3006 | 0.1125  | 0.1453 | 0.5198 | #####  | 0.0105 | 2.5678  |
| class.Deltaproteobacteria.id.3087 | Stroke              | MR Egger                  | 4 | 0.1671 | 0.0270 | 1.0326    | 0.1940 | 0.1003  | 0.0552 | 0.2109 | #####  | 0.0000 | 4.5584  |
| class.Deltaproteobacteria.id.3087 | Stroke              | Weighted median           | 4 | 0.9114 | 0.7489 | 1.1093    | 0.3548 | 0.1003  | 0.0552 | 0.2109 | #####  | 0.0000 | 4.5584  |
| class.Deltaproteobacteria.id.3087 | Stroke              | Inverse variance weighted | 4 | 0.8835 | 0.5936 | 1.3149    | 0.5414 | 0.1003  | 0.0552 | 0.2109 | #####  | 0.0000 | 4.5584  |
| class.Deltaproteobacteria.id.3087 | Stroke              | Simple mode               | 4 | 0.8678 | 0.6051 | 1.2445    | 0.4970 | 0.1003  | 0.0552 | 0.2109 | #####  | 0.0000 | 4.5584  |
| class.Deltaproteobacteria.id.3087 | Stroke              | Weighted mode             | 4 | 0.9126 | 0.6711 | 1.2409    | 0.6006 | 0.1003  | 0.0552 | 0.2109 | #####  | 0.0000 | 4.5584  |
| class.Erysipelotrichia.id.2147    | CardioEmbolicStroke | MR Egger                  | 3 | 1.1245 | 0.0237 | 53.4169   | 0.9621 | 0.0214  | 0.1615 | 0.9162 | 3.5596 | 0.0592 | 3.7278  |
| class.Erysipelotrichia.id.2147    | CardioEmbolicStroke | Weighted median           | 3 | 1.4138 | 0.8399 | 2.3796    | 0.1924 | 0.0214  | 0.1615 | 0.9162 | 3.5596 | 0.0592 | 3.7278  |
| class.Erysipelotrichia.id.2147    | CardioEmbolicStroke | Inverse variance weighted | 3 | 1.4537 | 0.8923 | 2.3683    | 0.1330 | 0.0214  | 0.1615 | 0.9162 | 3.5596 | 0.0592 | 3.7278  |
| class.Erysipelotrichia.id.2147    | CardioEmbolicStroke | Simple mode               | 3 | 1.4355 | 0.7408 | 2.7820    | 0.3963 | 0.0214  | 0.1615 | 0.9162 | 3.5596 | 0.0592 | 3.7278  |
| class.Erysipelotrichia.id.2147    | CardioEmbolicStroke | Weighted mode             | 3 | 1.4275 | 0.7579 | 2.6887    | 0.3854 | 0.0214  | 0.1615 | 0.9162 | 3.5596 | 0.0592 | 3.7278  |
| class.Erysipelotrichia.id.2147    | IschemicStroke      | MR Egger                  | 3 | 1.1424 | 0.4704 | 2.7742    | 0.8179 | -0.0082 | 0.0374 | 0.8618 | 0.0491 | 0.8246 | 80.9974 |
| class.Erysipelotrichia.id.2147    | IschemicStroke      | Weighted median           | 3 | 1.0310 | 0.8494 | 1.2514    | 0.7574 | -0.0082 | 0.0374 | 0.8618 | 0.0491 | 0.8246 | 80.9974 |
| class.Erysipelotrichia.id.2147    | IschemicStroke      | Inverse variance weighted | 3 | 1.0354 | 0.8850 | 1.2113    | 0.6639 | -0.0082 | 0.0374 | 0.8618 | 0.0491 | 0.8246 | 80.9974 |
| class.Erysipelotrichia.id.2147    | IschemicStroke      | Simple mode               | 3 | 1.0247 | 0.8353 | 1.2570    | 0.8366 | -0.0082 | 0.0374 | 0.8618 | 0.0491 | 0.8246 | 80.9974 |
| class.Erysipelotrichia.id.2147    | IschemicStroke      | Weighted mode             | 3 | 1.0217 | 0.8177 | 1.2767    | 0.8674 | -0.0082 | 0.0374 | 0.8618 | 0.0491 | 0.8246 | 80.9974 |
| class.Erysipelotrichia.id.2147    | LargeArteryStroke   | MR Egger                  | 3 | 3.9301 | 0.0147 | 1049.3888 | 0.7150 | -0.1245 | 0.2331 | 0.6877 | 3.8991 | 0.0483 | 2.1701  |
| class.Erysipelotrichia.id.2147    | LargeArteryStroke   | Weighted median           | 3 | 0.6865 | 0.3687 | 1.2783    | 0.2357 | -0.1245 | 0.2331 | 0.6877 | 3.8991 | 0.0483 | 2.1701  |
| class.Erysipelotrichia.id.2147    | LargeArteryStroke   | Inverse variance weighted | 3 | 0.8776 | 0.4018 | 1.9169    | 0.7433 | -0.1245 | 0.2331 | 0.6877 | 3.8991 | 0.0483 | 2.1701  |

|                                |                     |                           |   |        |        |         |        |         |        |        |        |        |          |
|--------------------------------|---------------------|---------------------------|---|--------|--------|---------|--------|---------|--------|--------|--------|--------|----------|
| class.Erysipelotrichia.id.2147 | LargeArteryStroke   | Simple mode               | 3 | 0.6439 | 0.3106 | 1.3350  | 0.3583 | -0.1245 | 0.2331 | 0.6877 | 3.8991 | 0.0483 | 2.1701   |
| class.Erysipelotrichia.id.2147 | LargeArteryStroke   | Weighted mode             | 3 | 0.6474 | 0.3206 | 1.3075  | 0.3491 | -0.1245 | 0.2331 | 0.6877 | 3.8991 | 0.0483 | 2.1701   |
| class.Erysipelotrichia.id.2147 | SmallVesselStroke   | MR Egger                  | 3 | 0.9585 | 0.0723 | 12.7034 | 0.9796 | -0.0152 | 0.1078 | 0.9107 | 0.0530 | 0.8179 | 13.1813  |
| class.Erysipelotrichia.id.2147 | SmallVesselStroke   | Weighted median           | 3 | 0.7748 | 0.4650 | 1.2909  | 0.3272 | -0.0152 | 0.1078 | 0.9107 | 0.0530 | 0.8179 | 13.1813  |
| class.Erysipelotrichia.id.2147 | SmallVesselStroke   | Inverse variance weighted | 3 | 0.7981 | 0.5076 | 1.2547  | 0.3286 | -0.0152 | 0.1078 | 0.9107 | 0.0530 | 0.8179 | 13.1813  |
| class.Erysipelotrichia.id.2147 | SmallVesselStroke   | Simple mode               | 3 | 0.7705 | 0.4184 | 1.4187  | 0.4906 | -0.0152 | 0.1078 | 0.9107 | 0.0530 | 0.8179 | 13.1813  |
| class.Erysipelotrichia.id.2147 | SmallVesselStroke   | Weighted mode             | 3 | 0.7709 | 0.4136 | 1.4366  | 0.4987 | -0.0152 | 0.1078 | 0.9107 | 0.0530 | 0.8179 | 13.1813  |
| class.Erysipelotrichia.id.2147 | Stroke              | MR Egger                  | 3 | 1.3852 | 0.6104 | 3.1434  | 0.5786 | -0.0251 | 0.0345 | 0.5998 | 0.3773 | 0.5391 | 47.1640  |
| class.Erysipelotrichia.id.2147 | Stroke              | Weighted median           | 3 | 1.0235 | 0.8592 | 1.2191  | 0.7951 | -0.0251 | 0.0345 | 0.5998 | 0.3773 | 0.5391 | 47.1640  |
| class.Erysipelotrichia.id.2147 | Stroke              | Inverse variance weighted | 3 | 1.0270 | 0.8883 | 1.1874  | 0.7186 | -0.0251 | 0.0345 | 0.5998 | 0.3773 | 0.5391 | 47.1640  |
| class.Erysipelotrichia.id.2147 | Stroke              | Simple mode               | 3 | 1.0210 | 0.8165 | 1.2768  | 0.8720 | -0.0251 | 0.0345 | 0.5998 | 0.3773 | 0.5391 | 47.1640  |
| class.Erysipelotrichia.id.2147 | Stroke              | Weighted mode             | 3 | 1.0023 | 0.8251 | 1.2177  | 0.9834 | -0.0251 | 0.0345 | 0.5998 | 0.3773 | 0.5391 | 47.1640  |
| class.Lentisphaeria.id.2250    | CardioEmbolicStroke | MR Egger                  | 3 | 0.7191 | 0.2112 | 2.4484  | 0.6910 | 0.0318  | 0.0835 | 0.7682 | 2.5165 | 0.1127 | 25.0237  |
| class.Lentisphaeria.id.2250    | CardioEmbolicStroke | Weighted median           | 3 | 0.9455 | 0.7108 | 1.2577  | 0.7001 | 0.0318  | 0.0835 | 0.7682 | 2.5165 | 0.1127 | 25.0237  |
| class.Lentisphaeria.id.2250    | CardioEmbolicStroke | Inverse variance weighted | 3 | 0.9046 | 0.7051 | 1.1605  | 0.4301 | 0.0318  | 0.0835 | 0.7682 | 2.5165 | 0.1127 | 25.0237  |
| class.Lentisphaeria.id.2250    | CardioEmbolicStroke | Simple mode               | 3 | 0.9784 | 0.6919 | 1.3835  | 0.9131 | 0.0318  | 0.0835 | 0.7682 | 2.5165 | 0.1127 | 25.0237  |
| class.Lentisphaeria.id.2250    | CardioEmbolicStroke | Weighted mode             | 3 | 0.9917 | 0.6947 | 1.4157  | 0.9677 | 0.0318  | 0.0835 | 0.7682 | 2.5165 | 0.1127 | 25.0237  |
| class.Lentisphaeria.id.2250    | IschemicStroke      | MR Egger                  | 3 | 0.8805 | 0.6333 | 1.2243  | 0.5877 | 0.0020  | 0.0228 | 0.9430 | 0.0009 | 0.9757 | 44.1998  |
| class.Lentisphaeria.id.2250    | IschemicStroke      | Weighted median           | 3 | 0.8920 | 0.7961 | 0.9995  | 0.0489 | 0.0020  | 0.0228 | 0.9430 | 0.0009 | 0.9757 | 44.1998  |
| class.Lentisphaeria.id.2250    | IschemicStroke      | Inverse variance weighted | 3 | 0.8934 | 0.8172 | 0.9768  | 0.0133 | 0.0020  | 0.0228 | 0.9430 | 0.0009 | 0.9757 | 44.1998  |
| class.Lentisphaeria.id.2250    | IschemicStroke      | Simple mode               | 3 | 0.8909 | 0.7877 | 1.0076  | 0.2072 | 0.0020  | 0.0228 | 0.9430 | 0.0009 | 0.9757 | 44.1998  |
| class.Lentisphaeria.id.2250    | IschemicStroke      | Weighted mode             | 3 | 0.8909 | 0.7910 | 1.0034  | 0.1971 | 0.0020  | 0.0228 | 0.9430 | 0.0009 | 0.9757 | 44.1998  |
| class.Lentisphaeria.id.2250    | LargeArteryStroke   | Inverse variance weighted | 2 | 1.1046 | 0.7876 | 1.5491  | 0.5644 | NA      | NA     | NA     | 0.0020 | 0.9646 | 34.4299  |
| class.Lentisphaeria.id.2250    | SmallVesselStroke   | MR Egger                  | 3 | 1.1919 | 0.3321 | 4.2776  | 0.8326 | -0.0439 | 0.0865 | 0.7009 | 1.7063 | 0.1915 | 23.6678  |
| class.Lentisphaeria.id.2250    | SmallVesselStroke   | Weighted median           | 3 | 0.8648 | 0.6016 | 1.2430  | 0.4325 | -0.0439 | 0.0865 | 0.7009 | 1.7063 | 0.1915 | 23.6678  |
| class.Lentisphaeria.id.2250    | SmallVesselStroke   | Inverse variance weighted | 3 | 0.8663 | 0.6611 | 1.1353  | 0.2983 | -0.0439 | 0.0865 | 0.7009 | 1.7063 | 0.1915 | 23.6678  |
| class.Lentisphaeria.id.2250    | SmallVesselStroke   | Simple mode               | 3 | 0.8348 | 0.5346 | 1.3035  | 0.5103 | -0.0439 | 0.0865 | 0.7009 | 1.7063 | 0.1915 | 23.6678  |
| class.Lentisphaeria.id.2250    | SmallVesselStroke   | Weighted mode             | 3 | 0.8323 | 0.5369 | 1.2902  | 0.4981 | -0.0439 | 0.0865 | 0.7009 | 1.7063 | 0.1915 | 23.6678  |
| class.Lentisphaeria.id.2250    | Stroke              | MR Egger                  | 3 | 0.9466 | 0.7008 | 1.2787  | 0.7814 | -0.0033 | 0.0209 | 0.9012 | 0.0149 | 0.9029 | 74.4347  |
| class.Lentisphaeria.id.2250    | Stroke              | Weighted median           | 3 | 0.9218 | 0.8347 | 1.0180  | 0.1078 | -0.0033 | 0.0209 | 0.9012 | 0.0149 | 0.9029 | 74.4347  |
| class.Lentisphaeria.id.2250    | Stroke              | Inverse variance weighted | 3 | 0.9250 | 0.8519 | 1.0044  | 0.0635 | -0.0033 | 0.0209 | 0.9012 | 0.0149 | 0.9029 | 74.4347  |
| class.Lentisphaeria.id.2250    | Stroke              | Simple mode               | 3 | 0.9195 | 0.8229 | 1.0276  | 0.2770 | -0.0033 | 0.0209 | 0.9012 | 0.0149 | 0.9029 | 74.4347  |
| class.Lentisphaeria.id.2250    | Stroke              | Weighted mode             | 3 | 0.9195 | 0.8186 | 1.0327  | 0.2922 | -0.0033 | 0.0209 | 0.9012 | 0.0149 | 0.9029 | 74.4347  |
| class.Melainabacteria.id.1589  | CardioEmbolicStroke | Inverse variance weighted | 2 | 0.8963 | 0.6991 | 1.1492  | 0.3880 | NA      | NA     | NA     | 0.0600 | 0.8065 | 27.1499  |
| class.Melainabacteria.id.1589  | IschemicStroke      | Inverse variance weighted | 2 | 0.9840 | 0.8847 | 1.0944  | 0.7659 | NA      | NA     | NA     | 0.1347 | 0.7136 | 207.2260 |
| class.Melainabacteria.id.1589  | LargeArteryStroke   | Inverse variance weighted | 2 | 0.9345 | 0.5165 | 1.6909  | 0.8229 | NA      | NA     | NA     | 3.2625 | 0.0709 | 7.6248   |
| class.Melainabacteria.id.1589  | SmallVesselStroke   | Inverse variance weighted | 2 | 1.0298 | 0.6864 | 1.5452  | 0.8871 | NA      | NA     | NA     | 1.7353 | 0.1877 | 13.6692  |
| class.Melainabacteria.id.1589  | Stroke              | Inverse variance weighted | 2 | 0.9881 | 0.8959 | 1.0899  | 0.8110 | NA      | NA     | NA     | 0.0025 | 0.9600 | 319.0549 |
| class.Methanobacteria.id.119   | CardioEmbolicStroke | MR Egger                  | 3 | 0.7778 | 0.3269 | 1.8506  | 0.6711 | 0.0403  | 0.0563 | 0.6043 | 0.5282 | 0.7679 | 67.1615  |
| class.Methanobacteria.id.119   | CardioEmbolicStroke | Weighted median           | 3 | 1.0846 | 0.8696 | 1.3527  | 0.4712 | 0.0403  | 0.0563 | 0.6043 | 0.5282 | 0.7679 | 67.1615  |
| class.Methanobacteria.id.119   | CardioEmbolicStroke | Inverse variance weighted | 3 | 1.0608 | 0.8900 | 1.2643  | 0.5100 | 0.0403  | 0.0563 | 0.6043 | 0.5282 | 0.7679 | 67.1615  |
| class.Methanobacteria.id.119   | CardioEmbolicStroke | Simple mode               | 3 | 1.1074 | 0.8578 | 1.4295  | 0.5157 | 0.0403  | 0.0563 | 0.6043 | 0.5282 | 0.7679 | 67.1615  |
| class.Methanobacteria.id.119   | CardioEmbolicStroke | Weighted mode             | 3 | 1.1074 | 0.8572 | 1.4306  | 0.5168 | 0.0403  | 0.0563 | 0.6043 | 0.5282 | 0.7679 | 67.1615  |
| class.Methanobacteria.id.119   | IschemicStroke      | MR Egger                  | 3 | 0.8841 | 0.5716 | 1.3672  | 0.6779 | 0.0317  | 0.0280 | 0.4608 | 2.6254 | 0.2691 | 37.8629  |
| class.Methanobacteria.id.119   | IschemicStroke      | Weighted median           | 3 | 1.1019 | 0.9895 | 1.2270  | 0.0770 | 0.0317  | 0.0280 | 0.4608 | 2.6254 | 0.2691 | 37.8629  |
| class.Methanobacteria.id.119   | IschemicStroke      | Inverse variance weighted | 3 | 1.1317 | 1.0339 | 1.2387  | 0.0073 | 0.0317  | 0.0280 | 0.4608 | 2.6254 | 0.2691 | 37.8629  |
| class.Methanobacteria.id.119   | IschemicStroke      | Simple mode               | 3 | 1.0846 | 0.9579 | 1.2282  | 0.3286 | 0.0317  | 0.0280 | 0.4608 | 2.6254 | 0.2691 | 37.8629  |
| class.Methanobacteria.id.119   | IschemicStroke      | Weighted mode             | 3 | 1.0876 | 0.9620 | 1.2296  | 0.3118 | 0.0317  | 0.0280 | 0.4608 | 2.6254 | 0.2691 | 37.8629  |
| class.Methanobacteria.id.119   | LargeArteryStroke   | MR Egger                  | 3 | 0.7024 | 0.0789 | 6.2495  | 0.8047 | 0.0425  | 0.1429 | 0.8160 | 3.8602 | 0.0494 | 18.8003  |
| class.Methanobacteria.id.119   | LargeArteryStroke   | Weighted median           | 3 | 0.9002 | 0.6464 | 1.2535  | 0.5337 | 0.0425  | 0.1429 | 0.8160 | 3.8602 | 0.0494 | 18.8003  |
| class.Methanobacteria.id.119   | LargeArteryStroke   | Inverse variance weighted | 3 | 0.9716 | 0.6971 | 1.3542  | 0.8649 | 0.0425  | 0.1429 | 0.8160 | 3.8602 | 0.0494 | 18.8003  |
| class.Methanobacteria.id.119   | LargeArteryStroke   | Simple mode               | 3 | 0.8443 | 0.5755 | 1.2387  | 0.4780 | 0.0425  | 0.1429 | 0.8160 | 3.8602 | 0.0494 | 18.8003  |
| class.Methanobacteria.id.119   | LargeArteryStroke   | Weighted mode             | 3 | 0.8443 | 0.5690 | 1.2529  | 0.4891 | 0.0425  | 0.1429 | 0.8160 | 3.8602 | 0.0494 | 18.8003  |
| class.Methanobacteria.id.119   | SmallVesselStroke   | MR Egger                  | 3 | 1.5653 | 0.4303 | 5.6932  | 0.6198 | -0.0505 | 0.0832 | 0.6529 | 1.3394 | 0.2471 | 23.1298  |

|                                   |                     |                           |   |         |        |           |        |         |        |        |        |        |          |
|-----------------------------------|---------------------|---------------------------|---|---------|--------|-----------|--------|---------|--------|--------|--------|--------|----------|
| class.Methanobacteria.id.119      | SmallVesselStroke   | Weighted median           | 3 | 1.1314  | 0.8427 | 1.5189    | 0.4115 | -0.0505 | 0.0832 | 0.6529 | 1.3394 | 0.2471 | 23.1298  |
| class.Methanobacteria.id.119      | SmallVesselStroke   | Inverse variance weighted | 3 | 1.0579  | 0.8489 | 1.3183    | 0.6164 | -0.0505 | 0.0832 | 0.6529 | 1.3394 | 0.2471 | 23.1298  |
| class.Methanobacteria.id.119      | SmallVesselStroke   | Simple mode               | 3 | 1.1878  | 0.8278 | 1.7043    | 0.4487 | -0.0505 | 0.0832 | 0.6529 | 1.3394 | 0.2471 | 23.1298  |
| class.Methanobacteria.id.119      | SmallVesselStroke   | Weighted mode             | 3 | 1.1864  | 0.8329 | 1.6899    | 0.4435 | -0.0505 | 0.0832 | 0.6529 | 1.3394 | 0.2471 | 23.1298  |
| class.Methanobacteria.id.119      | Stroke              | MR Egger                  | 3 | 0.8113  | 0.5413 | 1.2160    | 0.4960 | 0.0400  | 0.0261 | 0.3687 | 3.9526 | 0.1386 | 44.8865  |
| class.Methanobacteria.id.119      | Stroke              | Weighted median           | 3 | 1.0823  | 0.9753 | 1.2010    | 0.1364 | 0.0400  | 0.0261 | 0.3687 | 3.9526 | 0.1386 | 44.8865  |
| class.Methanobacteria.id.119      | Stroke              | Inverse variance weighted | 3 | 1.1057  | 0.9976 | 1.2255    | 0.0555 | 0.0400  | 0.0261 | 0.3687 | 3.9526 | 0.1386 | 44.8865  |
| class.Methanobacteria.id.119      | Stroke              | Simple mode               | 3 | 1.0712  | 0.9392 | 1.2219    | 0.4131 | 0.0400  | 0.0261 | 0.3687 | 3.9526 | 0.1386 | 44.8865  |
| class.Methanobacteria.id.119      | Stroke              | Weighted mode             | 3 | 1.0687  | 0.9469 | 1.2062    | 0.3942 | 0.0400  | 0.0261 | 0.3687 | 3.9526 | 0.1386 | 44.8865  |
| class.Mollicutes.id.3920          | CardioEmbolicStroke | Inverse variance weighted | 2 | 1.0704  | 0.5843 | 1.9611    | 0.8256 | NA      | NA     | NA     | 2.8254 | 0.0928 | 6.2196   |
| class.Mollicutes.id.3920          | IschemicStroke      | Inverse variance weighted | 2 | 0.9628  | 0.8231 | 1.1263    | 0.6360 | NA      | NA     | NA     | 0.0134 | 0.9080 | 71.9594  |
| class.Mollicutes.id.3920          | LargeArteryStroke   | Inverse variance weighted | 2 | 0.8008  | 0.4972 | 1.2899    | 0.3611 | NA      | NA     | NA     | 0.2219 | 0.6376 | 8.4920   |
| class.Mollicutes.id.3920          | SmallVesselStroke   | Inverse variance weighted | 2 | 1.0100  | 0.5755 | 1.7724    | 0.9724 | NA      | NA     | NA     | 1.6009 | 0.2058 | 7.0688   |
| class.Mollicutes.id.3920          | Stroke              | Inverse variance weighted | 2 | 1.0093  | 0.8730 | 1.1668    | 0.9009 | NA      | NA     | NA     | 0.0365 | 0.8485 | 173.7966 |
| class.Negativicutes.id.2164       | CardioEmbolicStroke | Inverse variance weighted | 2 | 0.8361  | 0.2518 | 2.7769    | 0.7701 | NA      | NA     | NA     | 6.6083 | 0.0102 | 3.7744   |
| class.Negativicutes.id.2164       | IschemicStroke      | Inverse variance weighted | 2 | 0.8851  | 0.5198 | 1.5073    | 0.6532 | NA      | NA     | NA     | 7.3599 | 0.0067 | 13.0342  |
| class.Negativicutes.id.2164       | LargeArteryStroke   | Inverse variance weighted | 2 | 0.4603  | 0.2477 | 0.8556    | 0.0142 | NA      | NA     | NA     | 0.2611 | 0.6093 | 1.2842   |
| class.Negativicutes.id.2164       | SmallVesselStroke   | Inverse variance weighted | 2 | 0.8355  | 0.4191 | 1.6659    | 0.6098 | NA      | NA     | NA     | 1.3770 | 0.2406 | 9.3744   |
| class.Negativicutes.id.2164       | Stroke              | Inverse variance weighted | 2 | 0.9044  | 0.5397 | 1.5154    | 0.7028 | NA      | NA     | NA     | 8.1287 | 0.0044 | 13.2528  |
| family.Acidaminococcaceae.id.2166 | CardioEmbolicStroke | MR Egger                  | 3 | 0.1914  | 0.0001 | 326.4896  | 0.7385 | 0.1092  | 0.2355 | 0.7236 | 0.2150 | 0.8981 | 21.7111  |
| family.Acidaminococcaceae.id.2166 | CardioEmbolicStroke | Weighted median           | 3 | 1.1038  | 0.7327 | 1.6628    | 0.6367 | 0.1092  | 0.2355 | 0.7236 | 0.2150 | 0.8981 | 21.7111  |
| family.Acidaminococcaceae.id.2166 | CardioEmbolicStroke | Inverse variance weighted | 3 | 1.1108  | 0.7908 | 1.5603    | 0.5445 | 0.1092  | 0.2355 | 0.7236 | 0.2150 | 0.8981 | 21.7111  |
| family.Acidaminococcaceae.id.2166 | CardioEmbolicStroke | Simple mode               | 3 | 1.0799  | 0.6820 | 1.7098    | 0.7742 | 0.1092  | 0.2355 | 0.7236 | 0.2150 | 0.8981 | 21.7111  |
| family.Acidaminococcaceae.id.2166 | CardioEmbolicStroke | Weighted mode             | 3 | 1.0812  | 0.6595 | 1.7724    | 0.7863 | 0.1092  | 0.2355 | 0.7236 | 0.2150 | 0.8981 | 21.7111  |
| family.Acidaminococcaceae.id.2166 | IschemicStroke      | MR Egger                  | 3 | 0.0654  | 0.0026 | 1.6429    | 0.3455 | 0.1682  | 0.1022 | 0.3475 | 3.5924 | 0.1659 | 18.2753  |
| family.Acidaminococcaceae.id.2166 | IschemicStroke      | Weighted median           | 3 | 0.9075  | 0.7421 | 1.1098    | 0.3446 | 0.1682  | 0.1022 | 0.3475 | 3.5924 | 0.1659 | 18.2753  |
| family.Acidaminococcaceae.id.2166 | IschemicStroke      | Inverse variance weighted | 3 | 0.9777  | 0.8032 | 1.1901    | 0.8220 | 0.1682  | 0.1022 | 0.3475 | 3.5924 | 0.1659 | 18.2753  |
| family.Acidaminococcaceae.id.2166 | IschemicStroke      | Simple mode               | 3 | 0.8797  | 0.6871 | 1.1262    | 0.4161 | 0.1682  | 0.1022 | 0.3475 | 3.5924 | 0.1659 | 18.2753  |
| family.Acidaminococcaceae.id.2166 | IschemicStroke      | Weighted mode             | 3 | 0.8805  | 0.6862 | 1.1299    | 0.4226 | 0.1682  | 0.1022 | 0.3475 | 3.5924 | 0.1659 | 18.2753  |
| family.Acidaminococcaceae.id.2166 | LargeArteryStroke   | MR Egger                  | 3 | 58.6319 | 0.0031 | #####     | 0.5663 | -0.2471 | 0.3110 | 0.5726 | 0.2011 | 0.6538 | 9.7628   |
| family.Acidaminococcaceae.id.2166 | LargeArteryStroke   | Weighted median           | 3 | 1.1845  | 0.6812 | 2.0598    | 0.5485 | -0.2471 | 0.3110 | 0.5726 | 0.2011 | 0.6538 | 9.7628   |
| family.Acidaminococcaceae.id.2166 | LargeArteryStroke   | Inverse variance weighted | 3 | 1.0902  | 0.6937 | 1.7133    | 0.7081 | -0.2471 | 0.3110 | 0.5726 | 0.2011 | 0.6538 | 9.7628   |
| family.Acidaminococcaceae.id.2166 | LargeArteryStroke   | Simple mode               | 3 | 1.2907  | 0.6744 | 2.4704    | 0.5216 | -0.2471 | 0.3110 | 0.5726 | 0.2011 | 0.6538 | 9.7628   |
| family.Acidaminococcaceae.id.2166 | LargeArteryStroke   | Weighted mode             | 3 | 1.2868  | 0.6499 | 2.5479    | 0.5445 | -0.2471 | 0.3110 | 0.5726 | 0.2011 | 0.6538 | 9.7628   |
| family.Acidaminococcaceae.id.2166 | SmallVesselStroke   | MR Egger                  | 3 | 0.0811  | 0.0000 | 815.3309  | 0.6876 | 0.1434  | 0.2917 | 0.7092 | 0.4014 | 0.5264 | 7.8946   |
| family.Acidaminococcaceae.id.2166 | SmallVesselStroke   | Weighted median           | 3 | 0.8508  | 0.5009 | 1.4451    | 0.5500 | 0.1434  | 0.2917 | 0.7092 | 0.4014 | 0.5264 | 7.8946   |
| family.Acidaminococcaceae.id.2166 | SmallVesselStroke   | Inverse variance weighted | 3 | 0.8155  | 0.5349 | 1.2431    | 0.3429 | 0.1434  | 0.2917 | 0.7092 | 0.4014 | 0.5264 | 7.8946   |
| family.Acidaminococcaceae.id.2166 | SmallVesselStroke   | Simple mode               | 3 | 0.9004  | 0.5031 | 1.6115    | 0.7577 | 0.1434  | 0.2917 | 0.7092 | 0.4014 | 0.5264 | 7.8946   |
| family.Acidaminococcaceae.id.2166 | SmallVesselStroke   | Weighted mode             | 3 | 0.8886  | 0.5185 | 1.5228    | 0.7092 | 0.1434  | 0.2917 | 0.7092 | 0.4014 | 0.5264 | 7.8946   |
| family.Acidaminococcaceae.id.2166 | Stroke              | MR Egger                  | 3 | 0.1861  | 0.0024 | 14.3807   | 0.5871 | 0.1065  | 0.1379 | 0.5813 | 2.1280 | 0.1446 | 20.8505  |
| family.Acidaminococcaceae.id.2166 | Stroke              | Weighted median           | 3 | 1.0211  | 0.8407 | 1.2401    | 0.8336 | 0.1065  | 0.1379 | 0.5813 | 2.1280 | 0.1446 | 20.8505  |
| family.Acidaminococcaceae.id.2166 | Stroke              | Inverse variance weighted | 3 | 1.0306  | 0.8634 | 1.2302    | 0.7387 | 0.1065  | 0.1379 | 0.5813 | 2.1280 | 0.1446 | 20.8505  |
| family.Acidaminococcaceae.id.2166 | Stroke              | Simple mode               | 3 | 0.9887  | 0.7626 | 1.2818    | 0.9395 | 0.1065  | 0.1379 | 0.5813 | 2.1280 | 0.1446 | 20.8505  |
| family.Acidaminococcaceae.id.2166 | Stroke              | Weighted mode             | 3 | 1.0063  | 0.7949 | 1.2740    | 0.9629 | 0.1065  | 0.1379 | 0.5813 | 2.1280 | 0.1446 | 20.8505  |
| family.Alcaligenaceae.id.2875     | CardioEmbolicStroke | MR Egger                  | 3 | 43.2971 | 0.3569 | 5252.7913 | 0.3668 | -0.2411 | 0.1447 | 0.3442 | 2.8400 | 0.2417 | 4.6043   |
| family.Alcaligenaceae.id.2875     | CardioEmbolicStroke | Weighted median           | 3 | 0.6304  | 0.3968 | 1.0016    | 0.0508 | -0.2411 | 0.1447 | 0.3442 | 2.8400 | 0.2417 | 4.6043   |
| family.Alcaligenaceae.id.2875     | CardioEmbolicStroke | Inverse variance weighted | 3 | 0.7412  | 0.4913 | 1.1183    | 0.1535 | -0.2411 | 0.1447 | 0.3442 | 2.8400 | 0.2417 | 4.6043   |
| family.Alcaligenaceae.id.2875     | CardioEmbolicStroke | Simple mode               | 3 | 0.5989  | 0.3198 | 1.1216    | 0.2504 | -0.2411 | 0.1447 | 0.3442 | 2.8400 | 0.2417 | 4.6043   |
| family.Alcaligenaceae.id.2875     | CardioEmbolicStroke | Weighted mode             | 3 | 0.5966  | 0.3122 | 1.1401    | 0.2584 | -0.2411 | 0.1447 | 0.3442 | 2.8400 | 0.2417 | 4.6043   |
| family.Alcaligenaceae.id.2875     | IschemicStroke      | MR Egger                  | 3 | 1.2192  | 0.1490 | 9.9724    | 0.8837 | -0.0128 | 0.0634 | 0.8728 | 0.3275 | 0.5672 | 63.8596  |
| family.Alcaligenaceae.id.2875     | IschemicStroke      | Weighted median           | 3 | 0.9969  | 0.8306 | 1.1965    | 0.9735 | -0.0128 | 0.0634 | 0.8728 | 0.3275 | 0.5672 | 63.8596  |
| family.Alcaligenaceae.id.2875     | IschemicStroke      | Inverse variance weighted | 3 | 0.9817  | 0.8446 | 1.1411    | 0.8097 | -0.0128 | 0.0634 | 0.8728 | 0.3275 | 0.5672 | 63.8596  |
| family.Alcaligenaceae.id.2875     | IschemicStroke      | Simple mode               | 3 | 1.0184  | 0.8297 | 1.2500    | 0.8777 | -0.0128 | 0.0634 | 0.8728 | 0.3275 | 0.5672 | 63.8596  |
| family.Alcaligenaceae.id.2875     | IschemicStroke      | Weighted mode             | 3 | 1.0169  | 0.8258 | 1.2523    | 0.8888 | -0.0128 | 0.0634 | 0.8728 | 0.3275 | 0.5672 | 63.8596  |

|                                            |                     |                           |   |        |        |            |        |         |        |        |        |        |          |
|--------------------------------------------|---------------------|---------------------------|---|--------|--------|------------|--------|---------|--------|--------|--------|--------|----------|
| family. Alcaligenaceae. id. 2875           | LargeArteryStroke   | MR Egger                  | 3 | 4.1187 | 0.0007 | 24442.8858 | 0.8032 | -0.0775 | 0.2626 | 0.8173 | 1.8759 | 0.1708 | 5.7210   |
| family. Alcaligenaceae. id. 2875           | LargeArteryStroke   | Weighted median           | 3 | 1.2525 | 0.6963 | 2.2531     | 0.4523 | -0.0775 | 0.2626 | 0.8173 | 1.8759 | 0.1708 | 5.7210   |
| family. Alcaligenaceae. id. 2875           | LargeArteryStroke   | Inverse variance weighted | 3 | 1.1167 | 0.7009 | 1.7791     | 0.6424 | -0.0775 | 0.2626 | 0.8173 | 1.8759 | 0.1708 | 5.7210   |
| family. Alcaligenaceae. id. 2875           | LargeArteryStroke   | Simple mode               | 3 | 1.3621 | 0.6482 | 2.8624     | 0.5004 | -0.0775 | 0.2626 | 0.8173 | 1.8759 | 0.1708 | 5.7210   |
| family. Alcaligenaceae. id. 2875           | LargeArteryStroke   | Weighted mode             | 3 | 1.3621 | 0.6652 | 2.7891     | 0.4870 | -0.0775 | 0.2626 | 0.8173 | 1.8759 | 0.1708 | 5.7210   |
| family. Alcaligenaceae. id. 2875           | SmallVesselStroke   | MR Egger                  | 3 | 0.5607 | 0.0016 | 200.5225   | 0.8787 | 0.0328  | 0.1773 | 0.8833 | 0.2720 | 0.6020 | 22.0800  |
| family. Alcaligenaceae. id. 2875           | SmallVesselStroke   | Weighted median           | 3 | 0.9315 | 0.5571 | 1.5577     | 0.7869 | 0.0328  | 0.1773 | 0.8833 | 0.2720 | 0.6020 | 22.0800  |
| family. Alcaligenaceae. id. 2875           | SmallVesselStroke   | Inverse variance weighted | 3 | 0.9761 | 0.6392 | 1.4907     | 0.9109 | 0.0328  | 0.1773 | 0.8833 | 0.2720 | 0.6020 | 22.0800  |
| family. Alcaligenaceae. id. 2875           | SmallVesselStroke   | Simple mode               | 3 | 0.9042 | 0.5118 | 1.5975     | 0.7619 | 0.0328  | 0.1773 | 0.8833 | 0.2720 | 0.6020 | 22.0800  |
| family. Alcaligenaceae. id. 2875           | SmallVesselStroke   | Weighted mode             | 3 | 0.9042 | 0.5156 | 1.5859     | 0.7590 | 0.0328  | 0.1773 | 0.8833 | 0.2720 | 0.6020 | 22.0800  |
| family. Alcaligenaceae. id. 2875           | Stroke              | MR Egger                  | 3 | 1.0209 | 0.1224 | 8.5114     | 0.9879 | -0.0030 | 0.0640 | 0.9702 | 1.2001 | 0.2733 | 35.6707  |
| family. Alcaligenaceae. id. 2875           | Stroke              | Weighted median           | 3 | 0.9718 | 0.8218 | 1.1491     | 0.7381 | -0.0030 | 0.0640 | 0.9702 | 1.2001 | 0.2733 | 35.6707  |
| family. Alcaligenaceae. id. 2875           | Stroke              | Inverse variance weighted | 3 | 0.9706 | 0.8445 | 1.1155     | 0.6740 | -0.0030 | 0.0640 | 0.9702 | 1.2001 | 0.2733 | 35.6707  |
| family. Alcaligenaceae. id. 2875           | Stroke              | Simple mode               | 3 | 0.9964 | 0.8100 | 1.2258     | 0.9762 | -0.0030 | 0.0640 | 0.9702 | 1.2001 | 0.2733 | 35.6707  |
| family. Alcaligenaceae. id. 2875           | Stroke              | Weighted mode             | 3 | 0.9717 | 0.7972 | 1.1842     | 0.8025 | -0.0030 | 0.0640 | 0.9702 | 1.2001 | 0.2733 | 35.6707  |
| family. BacteroidalesS24.7group. id. 11173 | CardioEmbolicStroke | Inverse variance weighted | 2 | 0.9777 | 0.7060 | 1.3540     | 0.8919 | NA      | NA     | NA     | 0.0013 | 0.9710 | 139.1586 |
| family. BacteroidalesS24.7group. id. 11173 | IschemicStroke      | Inverse variance weighted | 2 | 1.0358 | 0.8945 | 1.1993     | 0.6385 | NA      | NA     | NA     | 0.9298 | 0.3349 | 34.6132  |
| family. BacteroidalesS24.7group. id. 11173 | LargeArteryStroke   | Inverse variance weighted | 2 | 1.0180 | 0.6562 | 1.5793     | 0.9366 | NA      | NA     | NA     | 0.3918 | 0.5314 | 19.8075  |
| family. BacteroidalesS24.7group. id. 11173 | SmallVesselStroke   | Inverse variance weighted | 2 | 0.9113 | 0.6085 | 1.3646     | 0.6519 | NA      | NA     | NA     | 0.2881 | 0.5914 | 29.4101  |
| family. BacteroidalesS24.7group. id. 11173 | Stroke              | Inverse variance weighted | 2 | 1.0213 | 0.8926 | 1.1686     | 0.7593 | NA      | NA     | NA     | 0.0557 | 0.8134 | 112.8845 |
| family. Bifidobacteriaceae. id. 433        | CardioEmbolicStroke | MR Egger                  | 4 | 0.9312 | 0.1220 | 7.1081     | 0.9515 | -0.0128 | 0.0992 | 0.9091 | 3.4180 | 0.1810 | 7.0283   |
| family. Bifidobacteriaceae. id. 433        | CardioEmbolicStroke | Weighted median           | 4 | 0.9282 | 0.6585 | 1.3083     | 0.6705 | -0.0128 | 0.0992 | 0.9091 | 3.4180 | 0.1810 | 7.0283   |
| family. Bifidobacteriaceae. id. 433        | CardioEmbolicStroke | Inverse variance weighted | 4 | 0.8163 | 0.6073 | 1.0973     | 0.1788 | -0.0128 | 0.0992 | 0.9091 | 3.4180 | 0.1810 | 7.0283   |
| family. Bifidobacteriaceae. id. 433        | CardioEmbolicStroke | Simple mode               | 4 | 0.6239 | 0.3597 | 1.0823     | 0.1918 | -0.0128 | 0.0992 | 0.9091 | 3.4180 | 0.1810 | 7.0283   |
| family. Bifidobacteriaceae. id. 433        | CardioEmbolicStroke | Weighted mode             | 4 | 1.0019 | 0.6107 | 1.6437     | 0.9946 | -0.0128 | 0.0992 | 0.9091 | 3.4180 | 0.1810 | 7.0283   |
| family. Bifidobacteriaceae. id. 433        | IschemicStroke      | MR Egger                  | 4 | 1.3535 | 0.6843 | 2.6768     | 0.4761 | -0.0378 | 0.0334 | 0.3750 | 2.9372 | 0.4014 | 27.8269  |
| family. Bifidobacteriaceae. id. 433        | IschemicStroke      | Weighted median           | 4 | 0.9321 | 0.8006 | 1.0852     | 0.3648 | -0.0378 | 0.0334 | 0.3750 | 2.9372 | 0.4014 | 27.8269  |
| family. Bifidobacteriaceae. id. 433        | IschemicStroke      | Inverse variance weighted | 4 | 0.9183 | 0.8149 | 1.0349     | 0.1624 | -0.0378 | 0.0334 | 0.3750 | 2.9372 | 0.4014 | 27.8269  |
| family. Bifidobacteriaceae. id. 433        | IschemicStroke      | Simple mode               | 4 | 0.9318 | 0.7451 | 1.1652     | 0.5795 | -0.0378 | 0.0334 | 0.3750 | 2.9372 | 0.4014 | 27.8269  |
| family. Bifidobacteriaceae. id. 433        | IschemicStroke      | Weighted mode             | 4 | 0.9634 | 0.7907 | 1.1737     | 0.7357 | -0.0378 | 0.0334 | 0.3750 | 2.9372 | 0.4014 | 27.8269  |
| family. Bifidobacteriaceae. id. 433        | LargeArteryStroke   | MR Egger                  | 3 | 0.1273 | 0.0142 | 1.1434     | 0.3169 | 0.1906  | 0.1033 | 0.3161 | 3.5508 | 0.1694 | 5.7744   |
| family. Bifidobacteriaceae. id. 433        | LargeArteryStroke   | Weighted median           | 3 | 1.0980 | 0.6701 | 1.7990     | 0.7107 | 0.1906  | 0.1033 | 0.3161 | 3.5508 | 0.1694 | 5.7744   |
| family. Bifidobacteriaceae. id. 433        | LargeArteryStroke   | Inverse variance weighted | 3 | 0.9702 | 0.5630 | 1.6720     | 0.9133 | 0.1906  | 0.1033 | 0.3161 | 3.5508 | 0.1694 | 5.7744   |
| family. Bifidobacteriaceae. id. 433        | LargeArteryStroke   | Simple mode               | 3 | 1.4100 | 0.6461 | 3.0771     | 0.4791 | 0.1906  | 0.1033 | 0.3161 | 3.5508 | 0.1694 | 5.7744   |
| family. Bifidobacteriaceae. id. 433        | LargeArteryStroke   | Weighted mode             | 3 | 0.6525 | 0.3766 | 1.1307     | 0.2674 | 0.1906  | 0.1033 | 0.3161 | 3.5508 | 0.1694 | 5.7744   |
| family. Bifidobacteriaceae. id. 433        | SmallVesselStroke   | MR Egger                  | 4 | 0.7204 | 0.1070 | 4.8487     | 0.7681 | 0.0313  | 0.0931 | 0.7688 | 1.7963 | 0.4073 | 12.4140  |
| family. Bifidobacteriaceae. id. 433        | SmallVesselStroke   | Weighted median           | 4 | 0.9886 | 0.6454 | 1.5142     | 0.9579 | 0.0313  | 0.0931 | 0.7688 | 1.7963 | 0.4073 | 12.4140  |
| family. Bifidobacteriaceae. id. 433        | SmallVesselStroke   | Inverse variance weighted | 4 | 0.9938 | 0.7086 | 1.3938     | 0.9711 | 0.0313  | 0.0931 | 0.7688 | 1.7963 | 0.4073 | 12.4140  |
| family. Bifidobacteriaceae. id. 433        | SmallVesselStroke   | Simple mode               | 4 | 1.2604 | 0.6998 | 2.2699     | 0.4969 | 0.0313  | 0.0931 | 0.7688 | 1.7963 | 0.4073 | 12.4140  |
| family. Bifidobacteriaceae. id. 433        | SmallVesselStroke   | Weighted mode             | 4 | 0.8299 | 0.4799 | 1.4350     | 0.5523 | 0.0313  | 0.0931 | 0.7688 | 1.7963 | 0.4073 | 12.4140  |
| family. Bifidobacteriaceae. id. 433        | Stroke              | MR Egger                  | 4 | 1.0354 | 0.5371 | 1.9962     | 0.9267 | -0.0146 | 0.0321 | 0.6941 | 2.1570 | 0.3401 | 25.2288  |
| family. Bifidobacteriaceae. id. 433        | Stroke              | Weighted median           | 4 | 0.9296 | 0.8135 | 1.0623     | 0.2835 | -0.0146 | 0.0321 | 0.6941 | 2.1570 | 0.3401 | 25.2288  |
| family. Bifidobacteriaceae. id. 433        | Stroke              | Inverse variance weighted | 4 | 0.8914 | 0.7979 | 0.9958     | 0.0419 | -0.0146 | 0.0321 | 0.6941 | 2.1570 | 0.3401 | 25.2288  |
| family. Bifidobacteriaceae. id. 433        | Stroke              | Simple mode               | 4 | 0.9363 | 0.7810 | 1.1226     | 0.5284 | -0.0146 | 0.0321 | 0.6941 | 2.1570 | 0.3401 | 25.2288  |
| family. Bifidobacteriaceae. id. 433        | Stroke              | Weighted mode             | 4 | 0.9363 | 0.7885 | 1.1119     | 0.5075 | -0.0146 | 0.0321 | 0.6941 | 2.1570 | 0.3401 | 25.2288  |
| family. Clostridiaceae. id. 1869           | CardioEmbolicStroke | MR Egger                  | 3 | 1.4564 | 0.8059 | 2.6319     | 0.4307 | -0.0445 | 0.0287 | 0.3649 | 2.8883 | 0.2359 | 18.8119  |
| family. Clostridiaceae. id. 1869           | CardioEmbolicStroke | Weighted median           | 3 | 1.0543 | 0.7053 | 1.5758     | 0.7967 | -0.0445 | 0.0287 | 0.3649 | 2.8883 | 0.2359 | 18.8119  |
| family. Clostridiaceae. id. 1869           | CardioEmbolicStroke | Inverse variance weighted | 3 | 0.9784 | 0.6730 | 1.4224     | 0.9091 | -0.0445 | 0.0287 | 0.3649 | 2.8883 | 0.2359 | 18.8119  |
| family. Clostridiaceae. id. 1869           | CardioEmbolicStroke | Simple mode               | 3 | 1.1492 | 0.7147 | 1.8477     | 0.6240 | -0.0445 | 0.0287 | 0.3649 | 2.8883 | 0.2359 | 18.8119  |
| family. Clostridiaceae. id. 1869           | CardioEmbolicStroke | Weighted mode             | 3 | 1.1006 | 0.7003 | 1.7297     | 0.7181 | -0.0445 | 0.0287 | 0.3649 | 2.8883 | 0.2359 | 18.8119  |
| family. Clostridiaceae. id. 1869           | IschemicStroke      | MR Egger                  | 3 | 1.1198 | 0.8823 | 1.4212     | 0.5231 | -0.0208 | 0.0117 | 0.3275 | 3.2362 | 0.1983 | 70.9502  |
| family. Clostridiaceae. id. 1869           | IschemicStroke      | Weighted median           | 3 | 0.9740 | 0.8349 | 1.1364     | 0.7381 | -0.0208 | 0.0117 | 0.3275 | 3.2362 | 0.1983 | 70.9502  |
| family. Clostridiaceae. id. 1869           | IschemicStroke      | Inverse variance weighted | 3 | 0.9322 | 0.7953 | 1.0926     | 0.3861 | -0.0208 | 0.0117 | 0.3275 | 3.2362 | 0.1983 | 70.9502  |
| family. Clostridiaceae. id. 1869           | IschemicStroke      | Simple mode               | 3 | 0.9825 | 0.7937 | 1.2163     | 0.8862 | -0.0208 | 0.0117 | 0.3275 | 3.2362 | 0.1983 | 70.9502  |

|                                                |                     |                           |   |        |        |         |        |         |        |        |        |        |         |
|------------------------------------------------|---------------------|---------------------------|---|--------|--------|---------|--------|---------|--------|--------|--------|--------|---------|
| family. Clostridiaceae. id. 1869               | IschemicStroke      | Weighted mode             | 3 | 0.9923 | 0.8525 | 1.1551  | 0.9298 | -0.0208 | 0.0117 | 0.3275 | 3.2362 | 0.1983 | 70.9502 |
| family. Clostridiaceae. id. 1869               | LargeArteryStroke   | Inverse variance weighted | 2 | 1.0272 | 0.5287 | 1.9957  | 0.9369 | NA      | NA     | NA     | 1.8481 | 0.1740 | 10.9262 |
| family. Clostridiaceae. id. 1869               | SmallVesselStroke   | Inverse variance weighted | 2 | 0.9376 | 0.6081 | 1.4458  | 0.7707 | NA      | NA     | NA     | 0.3053 | 0.5806 | 23.3116 |
| family. Clostridiaceae. id. 1869               | Stroke              | MR Egger                  | 3 | 1.0804 | 0.8294 | 1.4074  | 0.6686 | -0.0147 | 0.0130 | 0.4616 | 3.3542 | 0.1869 | 47.5133 |
| family. Clostridiaceae. id. 1869               | Stroke              | Weighted median           | 3 | 0.9428 | 0.8213 | 1.0822  | 0.4022 | -0.0147 | 0.0130 | 0.4616 | 3.3542 | 0.1869 | 47.5133 |
| family. Clostridiaceae. id. 1869               | Stroke              | Inverse variance weighted | 3 | 0.9490 | 0.8187 | 1.1000  | 0.4871 | -0.0147 | 0.0130 | 0.4616 | 3.3542 | 0.1869 | 47.5133 |
| family. Clostridiaceae. id. 1869               | Stroke              | Simple mode               | 3 | 0.8572 | 0.6942 | 1.0584  | 0.2883 | -0.0147 | 0.0130 | 0.4616 | 3.3542 | 0.1869 | 47.5133 |
| family. Clostridiaceae. id. 1869               | Stroke              | Weighted mode             | 3 | 1.0521 | 0.8976 | 1.2333  | 0.5949 | -0.0147 | 0.0130 | 0.4616 | 3.3542 | 0.1869 | 47.5133 |
| family. ClostridialesvadinBB60group. id. 11286 | CardioEmbolicStroke | MR Egger                  | 3 | 2.6235 | 0.7782 | 8.8442  | 0.3637 | -0.0709 | 0.0521 | 0.4037 | 1.8639 | 0.3938 | 7.4836  |
| family. ClostridialesvadinBB60group. id. 11286 | CardioEmbolicStroke | Weighted median           | 3 | 1.0197 | 0.6864 | 1.5151  | 0.9229 | -0.0709 | 0.0521 | 0.4037 | 1.8639 | 0.3938 | 7.4836  |
| family. ClostridialesvadinBB60group. id. 11286 | CardioEmbolicStroke | Inverse variance weighted | 3 | 1.1571 | 0.8657 | 1.5465  | 0.3242 | -0.0709 | 0.0521 | 0.4037 | 1.8639 | 0.3938 | 7.4836  |
| family. ClostridialesvadinBB60group. id. 11286 | CardioEmbolicStroke | Simple mode               | 3 | 0.9965 | 0.6135 | 1.6185  | 0.9899 | -0.0709 | 0.0521 | 0.4037 | 1.8639 | 0.3938 | 7.4836  |
| family. ClostridialesvadinBB60group. id. 11286 | CardioEmbolicStroke | Weighted mode             | 3 | 0.9978 | 0.6289 | 1.5831  | 0.9933 | -0.0709 | 0.0521 | 0.4037 | 1.8639 | 0.3938 | 7.4836  |
| family. ClostridialesvadinBB60group. id. 11286 | IschemicStroke      | MR Egger                  | 3 | 1.4225 | 0.8222 | 2.4610  | 0.4271 | -0.0386 | 0.0234 | 0.3477 | 2.7277 | 0.2557 | 28.7386 |
| family. ClostridialesvadinBB60group. id. 11286 | IschemicStroke      | Weighted median           | 3 | 0.8658 | 0.7310 | 1.0255  | 0.0952 | -0.0386 | 0.0234 | 0.3477 | 2.7277 | 0.2557 | 28.7386 |
| family. ClostridialesvadinBB60group. id. 11286 | IschemicStroke      | Inverse variance weighted | 3 | 0.9097 | 0.7817 | 1.0586  | 0.2211 | -0.0386 | 0.0234 | 0.3477 | 2.7277 | 0.2557 | 28.7386 |
| family. ClostridialesvadinBB60group. id. 11286 | IschemicStroke      | Simple mode               | 3 | 0.8411 | 0.6700 | 1.0559  | 0.2743 | -0.0386 | 0.0234 | 0.3477 | 2.7277 | 0.2557 | 28.7386 |
| family. ClostridialesvadinBB60group. id. 11286 | IschemicStroke      | Weighted mode             | 3 | 0.8404 | 0.6699 | 1.0542  | 0.2716 | -0.0386 | 0.0234 | 0.3477 | 2.7277 | 0.2557 | 28.7386 |
| family. ClostridialesvadinBB60group. id. 11286 | LargeArteryStroke   | MR Egger                  | 3 | 1.7199 | 0.3392 | 8.7217  | 0.6310 | -0.0477 | 0.0695 | 0.6171 | 0.5225 | 0.7701 | 19.9700 |
| family. ClostridialesvadinBB60group. id. 11286 | LargeArteryStroke   | Weighted median           | 3 | 0.9534 | 0.5943 | 1.5295  | 0.8431 | -0.0477 | 0.0695 | 0.6171 | 0.5225 | 0.7701 | 19.9700 |
| family. ClostridialesvadinBB60group. id. 11286 | LargeArteryStroke   | Inverse variance weighted | 3 | 0.9902 | 0.6733 | 1.4563  | 0.9602 | -0.0477 | 0.0695 | 0.6171 | 0.5225 | 0.7701 | 19.9700 |
| family. ClostridialesvadinBB60group. id. 11286 | LargeArteryStroke   | Simple mode               | 3 | 0.9023 | 0.5393 | 1.5095  | 0.7332 | -0.0477 | 0.0695 | 0.6171 | 0.5225 | 0.7701 | 19.9700 |
| family. ClostridialesvadinBB60group. id. 11286 | LargeArteryStroke   | Weighted mode             | 3 | 0.9059 | 0.5270 | 1.5571  | 0.7548 | -0.0477 | 0.0695 | 0.6171 | 0.5225 | 0.7701 | 19.9700 |
| family. ClostridialesvadinBB60group. id. 11286 | SmallVesselStroke   | MR Egger                  | 3 | 0.4047 | 0.0841 | 1.9469  | 0.4616 | 0.0656  | 0.0668 | 0.5060 | 0.9695 | 0.6158 | 8.0275  |
| family. ClostridialesvadinBB60group. id. 11286 | SmallVesselStroke   | Weighted median           | 3 | 0.9688 | 0.6108 | 1.5365  | 0.8928 | 0.0656  | 0.0668 | 0.5060 | 0.9695 | 0.6158 | 8.0275  |
| family. ClostridialesvadinBB60group. id. 11286 | SmallVesselStroke   | Inverse variance weighted | 3 | 0.8695 | 0.6025 | 1.2550  | 0.4552 | 0.0656  | 0.0668 | 0.5060 | 0.9695 | 0.6158 | 8.0275  |
| family. ClostridialesvadinBB60group. id. 11286 | SmallVesselStroke   | Simple mode               | 3 | 0.9892 | 0.5855 | 1.6714  | 0.9714 | 0.0656  | 0.0668 | 0.5060 | 0.9695 | 0.6158 | 8.0275  |
| family. ClostridialesvadinBB60group. id. 11286 | SmallVesselStroke   | Weighted mode             | 3 | 0.9906 | 0.5758 | 1.7043  | 0.9759 | 0.0656  | 0.0668 | 0.5060 | 0.9695 | 0.6158 | 8.0275  |
| family. ClostridialesvadinBB60group. id. 11286 | Stroke              | MR Egger                  | 3 | 1.3793 | 0.8335 | 2.2823  | 0.4292 | -0.0387 | 0.0216 | 0.3238 | 3.2246 | 0.1994 | 25.2367 |
| family. ClostridialesvadinBB60group. id. 11286 | Stroke              | Weighted median           | 3 | 0.8420 | 0.7176 | 0.9879  | 0.0349 | -0.0387 | 0.0216 | 0.3238 | 3.2246 | 0.1994 | 25.2367 |
| family. ClostridialesvadinBB60group. id. 11286 | Stroke              | Inverse variance weighted | 3 | 0.8815 | 0.7572 | 1.0262  | 0.1037 | -0.0387 | 0.0216 | 0.3238 | 3.2246 | 0.1994 | 25.2367 |
| family. ClostridialesvadinBB60group. id. 11286 | Stroke              | Simple mode               | 3 | 0.8140 | 0.6522 | 1.0160  | 0.2105 | -0.0387 | 0.0216 | 0.3238 | 3.2246 | 0.1994 | 25.2367 |
| family. ClostridialesvadinBB60group. id. 11286 | Stroke              | Weighted mode             | 3 | 0.8135 | 0.6492 | 1.0193  | 0.2147 | -0.0387 | 0.0216 | 0.3238 | 3.2246 | 0.1994 | 25.2367 |
| family. Coriobacteriaceae. id. 811             | CardioEmbolicStroke | MR Egger                  | 4 | 0.3803 | 0.0776 | 1.8624  | 0.3553 | 0.0758  | 0.0677 | 0.3790 | 1.9272 | 0.5877 | 11.8413 |
| family. Coriobacteriaceae. id. 811             | CardioEmbolicStroke | Weighted median           | 4 | 0.8838 | 0.5847 | 1.3358  | 0.5578 | 0.0758  | 0.0677 | 0.3790 | 1.9272 | 0.5877 | 11.8413 |
| family. Coriobacteriaceae. id. 811             | CardioEmbolicStroke | Inverse variance weighted | 4 | 0.9244 | 0.6640 | 1.2868  | 0.6413 | 0.0758  | 0.0677 | 0.3790 | 1.9272 | 0.5877 | 11.8413 |
| family. Coriobacteriaceae. id. 811             | CardioEmbolicStroke | Simple mode               | 4 | 0.8390 | 0.4765 | 1.4775  | 0.5862 | 0.0758  | 0.0677 | 0.3790 | 1.9272 | 0.5877 | 11.8413 |
| family. Coriobacteriaceae. id. 811             | CardioEmbolicStroke | Weighted mode             | 4 | 0.8463 | 0.4807 | 1.4898  | 0.6035 | 0.0758  | 0.0677 | 0.3790 | 1.9272 | 0.5877 | 11.8413 |
| family. Coriobacteriaceae. id. 811             | IschemicStroke      | MR Egger                  | 4 | 1.1748 | 0.3547 | 3.8912  | 0.8167 | -0.0155 | 0.0511 | 0.7904 | 5.9981 | 0.0498 | 16.1116 |
| family. Coriobacteriaceae. id. 811             | IschemicStroke      | Weighted median           | 4 | 0.9805 | 0.8066 | 1.1921  | 0.8437 | -0.0155 | 0.0511 | 0.7904 | 5.9981 | 0.0498 | 16.1116 |
| family. Coriobacteriaceae. id. 811             | IschemicStroke      | Inverse variance weighted | 4 | 0.9802 | 0.7945 | 1.2093  | 0.8519 | -0.0155 | 0.0511 | 0.7904 | 5.9981 | 0.0498 | 16.1116 |
| family. Coriobacteriaceae. id. 811             | IschemicStroke      | Simple mode               | 4 | 0.9703 | 0.7077 | 1.3303  | 0.8634 | -0.0155 | 0.0511 | 0.7904 | 5.9981 | 0.0498 | 16.1116 |
| family. Coriobacteriaceae. id. 811             | IschemicStroke      | Weighted mode             | 4 | 0.9783 | 0.7152 | 1.3383  | 0.8997 | -0.0155 | 0.0511 | 0.7904 | 5.9981 | 0.0498 | 16.1116 |
| family. Coriobacteriaceae. id. 811             | LargeArteryStroke   | MR Egger                  | 4 | 2.3036 | 0.2502 | 21.2109 | 0.5380 | -0.0637 | 0.0948 | 0.5708 | 2.0279 | 0.3628 | 5.8616  |
| family. Coriobacteriaceae. id. 811             | LargeArteryStroke   | Weighted median           | 4 | 1.0872 | 0.6223 | 1.8993  | 0.7691 | -0.0637 | 0.0948 | 0.5708 | 2.0279 | 0.3628 | 5.8616  |
| family. Coriobacteriaceae. id. 811             | LargeArteryStroke   | Inverse variance weighted | 4 | 1.0936 | 0.6956 | 1.7193  | 0.6984 | -0.0637 | 0.0948 | 0.5708 | 2.0279 | 0.3628 | 5.8616  |
| family. Coriobacteriaceae. id. 811             | LargeArteryStroke   | Simple mode               | 4 | 1.0989 | 0.4723 | 2.5568  | 0.8408 | -0.0637 | 0.0948 | 0.5708 | 2.0279 | 0.3628 | 5.8616  |
| family. Coriobacteriaceae. id. 811             | LargeArteryStroke   | Weighted mode             | 4 | 1.0989 | 0.4926 | 2.4516  | 0.8326 | -0.0637 | 0.0948 | 0.5708 | 2.0279 | 0.3628 | 5.8616  |
| family. Coriobacteriaceae. id. 811             | SmallVesselStroke   | MR Egger                  | 4 | 1.8133 | 0.2532 | 12.9886 | 0.6136 | -0.0733 | 0.0833 | 0.4718 | 0.8258 | 0.8433 | 10.3831 |
| family. Coriobacteriaceae. id. 811             | SmallVesselStroke   | Weighted median           | 4 | 0.7899 | 0.4907 | 1.2716  | 0.3316 | -0.0733 | 0.0833 | 0.4718 | 0.8258 | 0.8433 | 10.3831 |
| family. Coriobacteriaceae. id. 811             | SmallVesselStroke   | Inverse variance weighted | 4 | 0.7642 | 0.5059 | 1.1543  | 0.2012 | -0.0733 | 0.0833 | 0.4718 | 0.8258 | 0.8433 | 10.3831 |
| family. Coriobacteriaceae. id. 811             | SmallVesselStroke   | Simple mode               | 4 | 0.8208 | 0.4284 | 1.5726  | 0.5935 | -0.0733 | 0.0833 | 0.4718 | 0.8258 | 0.8433 | 10.3831 |
| family. Coriobacteriaceae. id. 811             | SmallVesselStroke   | Weighted mode             | 4 | 0.8386 | 0.4266 | 1.6484  | 0.6449 | -0.0733 | 0.0833 | 0.4718 | 0.8258 | 0.8433 | 10.3831 |
| family. Coriobacteriaceae. id. 811             | Stroke              | MR Egger                  | 4 | 1.1884 | 0.2890 | 4.8869  | 0.8332 | -0.0145 | 0.0600 | 0.8313 | 9.8865 | 0.0071 | 12.7061 |

|                                       |                     |                           |   |        |        |           |        |         |        |        |        |        |         |
|---------------------------------------|---------------------|---------------------------|---|--------|--------|-----------|--------|---------|--------|--------|--------|--------|---------|
| family. Coriobacteriaceae. id. 811    | Stroke              | Weighted median           | 4 | 0.9793 | 0.8168 | 1.1742    | 0.8213 | -0.0145 | 0.0600 | 0.8313 | 9.8865 | 0.0071 | 12.7061 |
| family. Coriobacteriaceae. id. 811    | Stroke              | Inverse variance weighted | 4 | 1.0019 | 0.7830 | 1.2820    | 0.9879 | -0.0145 | 0.0600 | 0.8313 | 9.8865 | 0.0071 | 12.7061 |
| family. Coriobacteriaceae. id. 811    | Stroke              | Simple mode               | 4 | 0.9037 | 0.6357 | 1.2847    | 0.6122 | -0.0145 | 0.0600 | 0.8313 | 9.8865 | 0.0071 | 12.7061 |
| family. Coriobacteriaceae. id. 811    | Stroke              | Weighted mode             | 4 | 0.9300 | 0.6680 | 1.2947    | 0.6963 | -0.0145 | 0.0600 | 0.8313 | 9.8865 | 0.0071 | 12.7061 |
| family. Defluviitaleaceae. id. 1924   | CardioEmbolicStroke | Inverse variance weighted | 2 | 0.9617 | 0.7039 | 1.3141    | 0.8065 | NA      | NA     | NA     | 0.0884 | 0.7662 | 53.7619 |
| family. Defluviitaleaceae. id. 1924   | IschemicStroke      | Inverse variance weighted | 2 | 1.0019 | 0.8119 | 1.2365    | 0.9857 | NA      | NA     | NA     | 2.2669 | 0.1322 | 36.8752 |
| family. Defluviitaleaceae. id. 1924   | LargeArteryStroke   | Inverse variance weighted | 2 | 0.7586 | 0.4332 | 1.3286    | 0.3340 | NA      | NA     | NA     | 1.6249 | 0.2024 | 11.3415 |
| family. Defluviitaleaceae. id. 1924   | SmallVesselStroke   | Inverse variance weighted | 2 | 1.0701 | 0.4738 | 2.4171    | 0.8705 | NA      | NA     | NA     | 4.3236 | 0.0376 | 4.5824  |
| family. Defluviitaleaceae. id. 1924   | Stroke              | Inverse variance weighted | 2 | 1.0459 | 0.8287 | 1.3200    | 0.7055 | NA      | NA     | NA     | 3.2261 | 0.0725 | 25.9960 |
| family. Desulfovibrionaceae. id. 3169 | CardioEmbolicStroke | MR Egger                  | 4 | 0.1676 | 0.0282 | 0.9981    | 0.1888 | 0.0884  | 0.0541 | 0.2437 | 3.6483 | 0.3020 | 3.4621  |
| family. Desulfovibrionaceae. id. 3169 | CardioEmbolicStroke | Weighted median           | 4 | 0.7409 | 0.5086 | 1.0793    | 0.1182 | 0.0884  | 0.0541 | 0.2437 | 3.6483 | 0.3020 | 3.4621  |
| family. Desulfovibrionaceae. id. 3169 | CardioEmbolicStroke | Inverse variance weighted | 4 | 0.7274 | 0.5263 | 1.0054    | 0.0539 | 0.0884  | 0.0541 | 0.2437 | 3.6483 | 0.3020 | 3.4621  |
| family. Desulfovibrionaceae. id. 3169 | CardioEmbolicStroke | Simple mode               | 4 | 0.7379 | 0.3972 | 1.3707    | 0.4070 | 0.0884  | 0.0541 | 0.2437 | 3.6483 | 0.3020 | 3.4621  |
| family. Desulfovibrionaceae. id. 3169 | CardioEmbolicStroke | Weighted mode             | 4 | 0.7500 | 0.4223 | 1.3322    | 0.3988 | 0.0884  | 0.0541 | 0.2437 | 3.6483 | 0.3020 | 3.4621  |
| family. Desulfovibrionaceae. id. 3169 | IschemicStroke      | MR Egger                  | 4 | 0.1454 | 0.0252 | 0.8387    | 0.1638 | 0.1090  | 0.0534 | 0.1781 | #####  | 0.0000 | 4.2068  |
| family. Desulfovibrionaceae. id. 3169 | IschemicStroke      | Weighted median           | 4 | 0.9032 | 0.7326 | 1.1135    | 0.3405 | 0.1090  | 0.0534 | 0.1781 | #####  | 0.0000 | 4.2068  |
| family. Desulfovibrionaceae. id. 3169 | IschemicStroke      | Inverse variance weighted | 4 | 0.8779 | 0.5747 | 1.3410    | 0.5468 | 0.1090  | 0.0534 | 0.1781 | #####  | 0.0000 | 4.2068  |
| family. Desulfovibrionaceae. id. 3169 | IschemicStroke      | Simple mode               | 4 | 0.8427 | 0.5475 | 1.2971    | 0.4934 | 0.1090  | 0.0534 | 0.1781 | #####  | 0.0000 | 4.2068  |
| family. Desulfovibrionaceae. id. 3169 | IschemicStroke      | Weighted mode             | 4 | 0.8988 | 0.6448 | 1.2529    | 0.5736 | 0.1090  | 0.0534 | 0.1781 | #####  | 0.0000 | 4.2068  |
| family. Desulfovibrionaceae. id. 3169 | LargeArteryStroke   | MR Egger                  | 4 | 0.9100 | 0.0350 | 23.6767   | 0.9599 | 0.0066  | 0.0988 | 0.9527 | 3.7301 | 0.1549 | 5.9954  |
| family. Desulfovibrionaceae. id. 3169 | LargeArteryStroke   | Weighted median           | 4 | 1.1003 | 0.6688 | 1.8101    | 0.7068 | 0.0066  | 0.0988 | 0.9527 | 3.7301 | 0.1549 | 5.9954  |
| family. Desulfovibrionaceae. id. 3169 | LargeArteryStroke   | Inverse variance weighted | 4 | 1.0155 | 0.6554 | 1.5735    | 0.9450 | 0.0066  | 0.0988 | 0.9527 | 3.7301 | 0.1549 | 5.9954  |
| family. Desulfovibrionaceae. id. 3169 | LargeArteryStroke   | Simple mode               | 4 | 1.1814 | 0.5685 | 2.4550    | 0.6853 | 0.0066  | 0.0988 | 0.9527 | 3.7301 | 0.1549 | 5.9954  |
| family. Desulfovibrionaceae. id. 3169 | LargeArteryStroke   | Weighted mode             | 4 | 1.1592 | 0.5804 | 2.3154    | 0.7037 | 0.0066  | 0.0988 | 0.9527 | 3.7301 | 0.1549 | 5.9954  |
| family. Desulfovibrionaceae. id. 3169 | SmallVesselStroke   | MR Egger                  | 4 | 0.1369 | 0.0015 | 12.2552   | 0.4773 | 0.1217  | 0.1362 | 0.4660 | #####  | 0.0104 | 2.6109  |
| family. Desulfovibrionaceae. id. 3169 | SmallVesselStroke   | Weighted median           | 4 | 0.7815 | 0.4775 | 1.2789    | 0.3265 | 0.1217  | 0.1362 | 0.4660 | #####  | 0.0104 | 2.6109  |
| family. Desulfovibrionaceae. id. 3169 | SmallVesselStroke   | Inverse variance weighted | 4 | 1.0323 | 0.5064 | 2.1043    | 0.9303 | 0.1217  | 0.1362 | 0.4660 | #####  | 0.0104 | 2.6109  |
| family. Desulfovibrionaceae. id. 3169 | SmallVesselStroke   | Simple mode               | 4 | 0.7332 | 0.4165 | 1.2906    | 0.3608 | 0.1217  | 0.1362 | 0.4660 | #####  | 0.0104 | 2.6109  |
| family. Desulfovibrionaceae. id. 3169 | SmallVesselStroke   | Weighted mode             | 4 | 0.7210 | 0.4249 | 1.2236    | 0.3122 | 0.1217  | 0.1362 | 0.4660 | #####  | 0.0104 | 2.6109  |
| family. Desulfovibrionaceae. id. 3169 | Stroke              | MR Egger                  | 4 | 0.1631 | 0.0334 | 0.7965    | 0.1543 | 0.1023  | 0.0484 | 0.1687 | #####  | 0.0000 | 4.6314  |
| family. Desulfovibrionaceae. id. 3169 | Stroke              | Weighted median           | 4 | 0.9071 | 0.7496 | 1.0977    | 0.3164 | 0.1023  | 0.0484 | 0.1687 | #####  | 0.0000 | 4.6314  |
| family. Desulfovibrionaceae. id. 3169 | Stroke              | Inverse variance weighted | 4 | 0.8809 | 0.5943 | 1.3056    | 0.5276 | 0.1023  | 0.0484 | 0.1687 | #####  | 0.0000 | 4.6314  |
| family. Desulfovibrionaceae. id. 3169 | Stroke              | Simple mode               | 4 | 0.8651 | 0.6022 | 1.2426    | 0.4900 | 0.1023  | 0.0484 | 0.1687 | #####  | 0.0000 | 4.6314  |
| family. Desulfovibrionaceae. id. 3169 | Stroke              | Weighted mode             | 4 | 0.9050 | 0.6754 | 1.2128    | 0.5518 | 0.1023  | 0.0484 | 0.1687 | #####  | 0.0000 | 4.6314  |
| family. Erysipelotrichaceae. id. 2149 | CardioEmbolicStroke | MR Egger                  | 3 | 1.1245 | 0.0237 | 53.4169   | 0.9621 | 0.0214  | 0.1615 | 0.9162 | 3.5596 | 0.0592 | 3.7278  |
| family. Erysipelotrichaceae. id. 2149 | CardioEmbolicStroke | Weighted median           | 3 | 1.4138 | 0.8523 | 2.3451    | 0.1799 | 0.0214  | 0.1615 | 0.9162 | 3.5596 | 0.0592 | 3.7278  |
| family. Erysipelotrichaceae. id. 2149 | CardioEmbolicStroke | Inverse variance weighted | 3 | 1.4537 | 0.8923 | 2.3683    | 0.1330 | 0.0214  | 0.1615 | 0.9162 | 3.5596 | 0.0592 | 3.7278  |
| family. Erysipelotrichaceae. id. 2149 | CardioEmbolicStroke | Simple mode               | 3 | 1.4355 | 0.7242 | 2.8456    | 0.4092 | 0.0214  | 0.1615 | 0.9162 | 3.5596 | 0.0592 | 3.7278  |
| family. Erysipelotrichaceae. id. 2149 | CardioEmbolicStroke | Weighted mode             | 3 | 1.4275 | 0.7680 | 2.6535    | 0.3773 | 0.0214  | 0.1615 | 0.9162 | 3.5596 | 0.0592 | 3.7278  |
| family. Erysipelotrichaceae. id. 2149 | IschemicStroke      | MR Egger                  | 3 | 1.1424 | 0.4704 | 2.7742    | 0.8179 | -0.0082 | 0.0374 | 0.8618 | 0.0491 | 0.8246 | 80.9974 |
| family. Erysipelotrichaceae. id. 2149 | IschemicStroke      | Weighted median           | 3 | 1.0310 | 0.8566 | 1.2410    | 0.7468 | -0.0082 | 0.0374 | 0.8618 | 0.0491 | 0.8246 | 80.9974 |
| family. Erysipelotrichaceae. id. 2149 | IschemicStroke      | Inverse variance weighted | 3 | 1.0354 | 0.8850 | 1.2113    | 0.6639 | -0.0082 | 0.0374 | 0.8618 | 0.0491 | 0.8246 | 80.9974 |
| family. Erysipelotrichaceae. id. 2149 | IschemicStroke      | Simple mode               | 3 | 1.0247 | 0.8346 | 1.2582    | 0.8373 | -0.0082 | 0.0374 | 0.8618 | 0.0491 | 0.8246 | 80.9974 |
| family. Erysipelotrichaceae. id. 2149 | IschemicStroke      | Weighted mode             | 3 | 1.0217 | 0.8278 | 1.2611    | 0.8598 | -0.0082 | 0.0374 | 0.8618 | 0.0491 | 0.8246 | 80.9974 |
| family. Erysipelotrichaceae. id. 2149 | LargeArteryStroke   | MR Egger                  | 3 | 3.9301 | 0.0147 | 1049.3888 | 0.7150 | -0.1245 | 0.2331 | 0.6877 | 3.8991 | 0.0483 | 2.1701  |
| family. Erysipelotrichaceae. id. 2149 | LargeArteryStroke   | Weighted median           | 3 | 0.6865 | 0.3605 | 1.3074    | 0.2524 | -0.1245 | 0.2331 | 0.6877 | 3.8991 | 0.0483 | 2.1701  |
| family. Erysipelotrichaceae. id. 2149 | LargeArteryStroke   | Inverse variance weighted | 3 | 0.8776 | 0.4018 | 1.9169    | 0.7433 | -0.1245 | 0.2331 | 0.6877 | 3.8991 | 0.0483 | 2.1701  |
| family. Erysipelotrichaceae. id. 2149 | LargeArteryStroke   | Simple mode               | 3 | 0.6439 | 0.2934 | 1.4132    | 0.3869 | -0.1245 | 0.2331 | 0.6877 | 3.8991 | 0.0483 | 2.1701  |
| family. Erysipelotrichaceae. id. 2149 | LargeArteryStroke   | Weighted mode             | 3 | 0.6474 | 0.3203 | 1.3088    | 0.3497 | -0.1245 | 0.2331 | 0.6877 | 3.8991 | 0.0483 | 2.1701  |
| family. Erysipelotrichaceae. id. 2149 | SmallVesselStroke   | MR Egger                  | 3 | 0.9585 | 0.0723 | 12.7034   | 0.9796 | -0.0152 | 0.1078 | 0.9107 | 0.0530 | 0.8179 | 13.1813 |
| family. Erysipelotrichaceae. id. 2149 | SmallVesselStroke   | Weighted median           | 3 | 0.7748 | 0.4604 | 1.3038    | 0.3365 | -0.0152 | 0.1078 | 0.9107 | 0.0530 | 0.8179 | 13.1813 |
| family. Erysipelotrichaceae. id. 2149 | SmallVesselStroke   | Inverse variance weighted | 3 | 0.7981 | 0.5076 | 1.2547    | 0.3286 | -0.0152 | 0.1078 | 0.9107 | 0.0530 | 0.8179 | 13.1813 |
| family. Erysipelotrichaceae. id. 2149 | SmallVesselStroke   | Simple mode               | 3 | 0.7705 | 0.4330 | 1.3710    | 0.4687 | -0.0152 | 0.1078 | 0.9107 | 0.0530 | 0.8179 | 13.1813 |
| family. Erysipelotrichaceae. id. 2149 | SmallVesselStroke   | Weighted mode             | 3 | 0.7709 | 0.4349 | 1.3663    | 0.4668 | -0.0152 | 0.1078 | 0.9107 | 0.0530 | 0.8179 | 13.1813 |

|                                       |                     |                           |   |        |        |        |        |         |        |        |        |        |          |
|---------------------------------------|---------------------|---------------------------|---|--------|--------|--------|--------|---------|--------|--------|--------|--------|----------|
| family. Erysipelotrichaceae. id. 2149 | Stroke              | MR Egger                  | 3 | 1.3852 | 0.6104 | 3.1434 | 0.5786 | -0.0251 | 0.0345 | 0.5998 | 0.3773 | 0.5391 | 47.1640  |
| family. Erysipelotrichaceae. id. 2149 | Stroke              | Weighted median           | 3 | 1.0235 | 0.8547 | 1.2255 | 0.8009 | -0.0251 | 0.0345 | 0.5998 | 0.3773 | 0.5391 | 47.1640  |
| family. Erysipelotrichaceae. id. 2149 | Stroke              | Inverse variance weighted | 3 | 1.0270 | 0.8883 | 1.1874 | 0.7186 | -0.0251 | 0.0345 | 0.5998 | 0.3773 | 0.5391 | 47.1640  |
| family. Erysipelotrichaceae. id. 2149 | Stroke              | Simple mode               | 3 | 1.0210 | 0.8177 | 1.2750 | 0.8712 | -0.0251 | 0.0345 | 0.5998 | 0.3773 | 0.5391 | 47.1640  |
| family. Erysipelotrichaceae. id. 2149 | Stroke              | Weighted mode             | 3 | 1.0023 | 0.8129 | 1.2359 | 0.9846 | -0.0251 | 0.0345 | 0.5998 | 0.3773 | 0.5391 | 47.1640  |
| family. FamilyXI. id. 1936            | CardioEmbolicStroke | Inverse variance weighted | 2 | 0.8718 | 0.6712 | 1.1322 | 0.3036 | NA      | NA     | NA     | 1.7972 | 0.1801 | 23.1198  |
| family. FamilyXI. id. 1936            | IschemicStroke      | Inverse variance weighted | 2 | 0.9637 | 0.8856 | 1.0487 | 0.3913 | NA      | NA     | NA     | 0.0042 | 0.9481 | 122.5122 |
| family. FamilyXI. id. 1936            | LargeArteryStroke   | Inverse variance weighted | 2 | 1.0850 | 0.6821 | 1.7258 | 0.7304 | NA      | NA     | NA     | 3.1310 | 0.0768 | 15.0567  |
| family. FamilyXI. id. 1936            | SmallVesselStroke   | Inverse variance weighted | 2 | 0.8847 | 0.6951 | 1.1260 | 0.3194 | NA      | NA     | NA     | 0.1381 | 0.7101 | 33.3559  |
| family. FamilyXI. id. 1936            | Stroke              | Inverse variance weighted | 2 | 0.9728 | 0.8995 | 1.0521 | 0.4904 | NA      | NA     | NA     | 0.0838 | 0.7722 | 145.0998 |
| family. FamilyXIII. id. 1957          | CardioEmbolicStroke | MR Egger                  | 4 | 0.6610 | 0.2677 | 1.6323 | 0.4641 | 0.0231  | 0.0321 | 0.5468 | 2.3668 | 0.3062 | 8.5566   |
| family. FamilyXIII. id. 1957          | CardioEmbolicStroke | Weighted median           | 4 | 0.8393 | 0.5763 | 1.2225 | 0.3614 | 0.0231  | 0.0321 | 0.5468 | 2.3668 | 0.3062 | 8.5566   |
| family. FamilyXIII. id. 1957          | CardioEmbolicStroke | Inverse variance weighted | 4 | 0.8998 | 0.6627 | 1.2216 | 0.4985 | 0.0231  | 0.0321 | 0.5468 | 2.3668 | 0.3062 | 8.5566   |
| family. FamilyXIII. id. 1957          | CardioEmbolicStroke | Simple mode               | 4 | 0.8292 | 0.4917 | 1.3983 | 0.5329 | 0.0231  | 0.0321 | 0.5468 | 2.3668 | 0.3062 | 8.5566   |
| family. FamilyXIII. id. 1957          | CardioEmbolicStroke | Weighted mode             | 4 | 0.8138 | 0.5094 | 1.3001 | 0.4521 | 0.0231  | 0.0321 | 0.5468 | 2.3668 | 0.3062 | 8.5566   |
| family. FamilyXIII. id. 1957          | IschemicStroke      | MR Egger                  | 4 | 0.7381 | 0.4826 | 1.1289 | 0.2963 | 0.0164  | 0.0150 | 0.3877 | 4.3188 | 0.2290 | 15.4079  |
| family. FamilyXIII. id. 1957          | IschemicStroke      | Weighted median           | 4 | 0.9152 | 0.7726 | 1.0840 | 0.3048 | 0.0164  | 0.0150 | 0.3877 | 4.3188 | 0.2290 | 15.4079  |
| family. FamilyXIII. id. 1957          | IschemicStroke      | Inverse variance weighted | 4 | 0.9207 | 0.7846 | 1.0805 | 0.3116 | 0.0164  | 0.0150 | 0.3877 | 4.3188 | 0.2290 | 15.4079  |
| family. FamilyXIII. id. 1957          | IschemicStroke      | Simple mode               | 4 | 0.9054 | 0.6814 | 1.2031 | 0.5425 | 0.0164  | 0.0150 | 0.3877 | 4.3188 | 0.2290 | 15.4079  |
| family. FamilyXIII. id. 1957          | IschemicStroke      | Weighted mode             | 4 | 0.8850 | 0.6955 | 1.1262 | 0.3938 | 0.0164  | 0.0150 | 0.3877 | 4.3188 | 0.2290 | 15.4079  |
| family. FamilyXIII. id. 1957          | LargeArteryStroke   | MR Egger                  | 4 | 2.0269 | 0.6147 | 6.6832 | 0.3656 | -0.0372 | 0.0416 | 0.4654 | 1.0091 | 0.6038 | 7.0002   |
| family. FamilyXIII. id. 1957          | LargeArteryStroke   | Weighted median           | 4 | 1.3981 | 0.8479 | 2.3052 | 0.1890 | -0.0372 | 0.0416 | 0.4654 | 1.0091 | 0.6038 | 7.0002   |
| family. FamilyXIII. id. 1957          | LargeArteryStroke   | Inverse variance weighted | 4 | 1.2167 | 0.8022 | 1.8456 | 0.3560 | -0.0372 | 0.0416 | 0.4654 | 1.0091 | 0.6038 | 7.0002   |
| family. FamilyXIII. id. 1957          | LargeArteryStroke   | Simple mode               | 4 | 1.4328 | 0.7342 | 2.7963 | 0.3692 | -0.0372 | 0.0416 | 0.4654 | 1.0091 | 0.6038 | 7.0002   |
| family. FamilyXIII. id. 1957          | LargeArteryStroke   | Weighted mode             | 4 | 1.4356 | 0.7667 | 2.6881 | 0.3407 | -0.0372 | 0.0416 | 0.4654 | 1.0091 | 0.6038 | 7.0002   |
| family. FamilyXIII. id. 1957          | SmallVesselStroke   | MR Egger                  | 4 | 0.8424 | 0.2200 | 3.2248 | 0.8256 | -0.0063 | 0.0463 | 0.9045 | 2.7839 | 0.2486 | 6.5138   |
| family. FamilyXIII. id. 1957          | SmallVesselStroke   | Weighted median           | 4 | 0.7145 | 0.4373 | 1.1674 | 0.1796 | -0.0063 | 0.0463 | 0.9045 | 2.7839 | 0.2486 | 6.5138   |
| family. FamilyXIII. id. 1957          | SmallVesselStroke   | Inverse variance weighted | 4 | 0.7720 | 0.5218 | 1.1421 | 0.1952 | -0.0063 | 0.0463 | 0.9045 | 2.7839 | 0.2486 | 6.5138   |
| family. FamilyXIII. id. 1957          | SmallVesselStroke   | Simple mode               | 4 | 0.6931 | 0.3420 | 1.4050 | 0.3842 | -0.0063 | 0.0463 | 0.9045 | 2.7839 | 0.2486 | 6.5138   |
| family. FamilyXIII. id. 1957          | SmallVesselStroke   | Weighted mode             | 4 | 0.6931 | 0.3473 | 1.3833 | 0.3749 | -0.0063 | 0.0463 | 0.9045 | 2.7839 | 0.2486 | 6.5138   |
| family. FamilyXIII. id. 1957          | Stroke              | MR Egger                  | 4 | 0.6844 | 0.4680 | 1.0009 | 0.1897 | 0.0226  | 0.0134 | 0.2354 | 6.0631 | 0.1086 | 13.6067  |
| family. FamilyXIII. id. 1957          | Stroke              | Weighted median           | 4 | 0.9517 | 0.8072 | 1.1221 | 0.5561 | 0.0226  | 0.0134 | 0.2354 | 6.0631 | 0.1086 | 13.6067  |
| family. FamilyXIII. id. 1957          | Stroke              | Inverse variance weighted | 4 | 0.9266 | 0.7773 | 1.1046 | 0.3954 | 0.0226  | 0.0134 | 0.2354 | 6.0631 | 0.1086 | 13.6067  |
| family. FamilyXIII. id. 1957          | Stroke              | Simple mode               | 4 | 0.9586 | 0.7272 | 1.2636 | 0.7838 | 0.0226  | 0.0134 | 0.2354 | 6.0631 | 0.1086 | 13.6067  |
| family. FamilyXIII. id. 1957          | Stroke              | Weighted mode             | 4 | 0.9463 | 0.7314 | 1.2244 | 0.7030 | 0.0226  | 0.0134 | 0.2354 | 6.0631 | 0.1086 | 13.6067  |
| family. Methanobacteriaceae. id. 121  | CardioEmbolicStroke | MR Egger                  | 3 | 0.7778 | 0.3269 | 1.8506 | 0.6711 | 0.0403  | 0.0563 | 0.6043 | 0.5282 | 0.7679 | 67.1615  |
| family. Methanobacteriaceae. id. 121  | CardioEmbolicStroke | Weighted median           | 3 | 1.0846 | 0.8742 | 1.3457 | 0.4606 | 0.0403  | 0.0563 | 0.6043 | 0.5282 | 0.7679 | 67.1615  |
| family. Methanobacteriaceae. id. 121  | CardioEmbolicStroke | Inverse variance weighted | 3 | 1.0608 | 0.8900 | 1.2643 | 0.5100 | 0.0403  | 0.0563 | 0.6043 | 0.5282 | 0.7679 | 67.1615  |
| family. Methanobacteriaceae. id. 121  | CardioEmbolicStroke | Simple mode               | 3 | 1.1074 | 0.8520 | 1.4392 | 0.5253 | 0.0403  | 0.0563 | 0.6043 | 0.5282 | 0.7679 | 67.1615  |
| family. Methanobacteriaceae. id. 121  | CardioEmbolicStroke | Weighted mode             | 3 | 1.1074 | 0.8666 | 1.4150 | 0.5005 | 0.0403  | 0.0563 | 0.6043 | 0.5282 | 0.7679 | 67.1615  |
| family. Methanobacteriaceae. id. 121  | IschemicStroke      | MR Egger                  | 3 | 0.8841 | 0.5716 | 1.3672 | 0.6779 | 0.0317  | 0.0280 | 0.4608 | 2.6254 | 0.2691 | 37.8629  |
| family. Methanobacteriaceae. id. 121  | IschemicStroke      | Weighted median           | 3 | 1.1019 | 0.9871 | 1.2300 | 0.0839 | 0.0317  | 0.0280 | 0.4608 | 2.6254 | 0.2691 | 37.8629  |
| family. Methanobacteriaceae. id. 121  | IschemicStroke      | Inverse variance weighted | 3 | 1.1317 | 1.0339 | 1.2387 | 0.0073 | 0.0317  | 0.0280 | 0.4608 | 2.6254 | 0.2691 | 37.8629  |
| family. Methanobacteriaceae. id. 121  | IschemicStroke      | Simple mode               | 3 | 1.0846 | 0.9505 | 1.2377 | 0.3510 | 0.0317  | 0.0280 | 0.4608 | 2.6254 | 0.2691 | 37.8629  |
| family. Methanobacteriaceae. id. 121  | IschemicStroke      | Weighted mode             | 3 | 1.0876 | 0.9648 | 1.2261 | 0.3032 | 0.0317  | 0.0280 | 0.4608 | 2.6254 | 0.2691 | 37.8629  |
| family. Methanobacteriaceae. id. 121  | LargeArteryStroke   | MR Egger                  | 3 | 0.7024 | 0.0789 | 6.2495 | 0.8047 | 0.0425  | 0.1429 | 0.8160 | 3.8602 | 0.0494 | 18.8003  |
| family. Methanobacteriaceae. id. 121  | LargeArteryStroke   | Weighted median           | 3 | 0.9002 | 0.6470 | 1.2525 | 0.5327 | 0.0425  | 0.1429 | 0.8160 | 3.8602 | 0.0494 | 18.8003  |
| family. Methanobacteriaceae. id. 121  | LargeArteryStroke   | Inverse variance weighted | 3 | 0.9716 | 0.6971 | 1.3542 | 0.8649 | 0.0425  | 0.1429 | 0.8160 | 3.8602 | 0.0494 | 18.8003  |
| family. Methanobacteriaceae. id. 121  | LargeArteryStroke   | Simple mode               | 3 | 0.8443 | 0.5660 | 1.2594 | 0.4940 | 0.0425  | 0.1429 | 0.8160 | 3.8602 | 0.0494 | 18.8003  |
| family. Methanobacteriaceae. id. 121  | LargeArteryStroke   | Weighted mode             | 3 | 0.8443 | 0.5661 | 1.2593 | 0.4940 | 0.0425  | 0.1429 | 0.8160 | 3.8602 | 0.0494 | 18.8003  |
| family. Methanobacteriaceae. id. 121  | SmallVesselStroke   | MR Egger                  | 3 | 1.5653 | 0.4303 | 5.6932 | 0.6198 | -0.0505 | 0.0832 | 0.6529 | 1.3394 | 0.2471 | 23.1298  |
| family. Methanobacteriaceae. id. 121  | SmallVesselStroke   | Weighted median           | 3 | 1.1314 | 0.8580 | 1.4919 | 0.3818 | -0.0505 | 0.0832 | 0.6529 | 1.3394 | 0.2471 | 23.1298  |
| family. Methanobacteriaceae. id. 121  | SmallVesselStroke   | Inverse variance weighted | 3 | 1.0579 | 0.8489 | 1.3183 | 0.6164 | -0.0505 | 0.0832 | 0.6529 | 1.3394 | 0.2471 | 23.1298  |
| family. Methanobacteriaceae. id. 121  | SmallVesselStroke   | Simple mode               | 3 | 1.1878 | 0.8297 | 1.7004 | 0.4463 | -0.0505 | 0.0832 | 0.6529 | 1.3394 | 0.2471 | 23.1298  |

|                                      |                     |                           |   |        |        |        |        |         |        |        |        |        |          |
|--------------------------------------|---------------------|---------------------------|---|--------|--------|--------|--------|---------|--------|--------|--------|--------|----------|
| family. Methanobacteriaceae. id. 121 | SmallVesselStroke   | Weighted mode             | 3 | 1.1864 | 0.8207 | 1.7152 | 0.4593 | -0.0505 | 0.0832 | 0.6529 | 1.3394 | 0.2471 | 23.1298  |
| family. Methanobacteriaceae. id. 121 | Stroke              | MR Egger                  | 3 | 0.8113 | 0.5413 | 1.2160 | 0.4960 | 0.0400  | 0.0261 | 0.3687 | 3.9526 | 0.1386 | 44.8865  |
| family. Methanobacteriaceae. id. 121 | Stroke              | Weighted median           | 3 | 1.0823 | 0.9781 | 1.1976 | 0.1258 | 0.0400  | 0.0261 | 0.3687 | 3.9526 | 0.1386 | 44.8865  |
| family. Methanobacteriaceae. id. 121 | Stroke              | Inverse variance weighted | 3 | 1.1057 | 0.9976 | 1.2255 | 0.0555 | 0.0400  | 0.0261 | 0.3687 | 3.9526 | 0.1386 | 44.8865  |
| family. Methanobacteriaceae. id. 121 | Stroke              | Simple mode               | 3 | 1.0712 | 0.9356 | 1.2266 | 0.4242 | 0.0400  | 0.0261 | 0.3687 | 3.9526 | 0.1386 | 44.8865  |
| family. Methanobacteriaceae. id. 121 | Stroke              | Weighted mode             | 3 | 1.0687 | 0.9475 | 1.2055 | 0.3925 | 0.0400  | 0.0261 | 0.3687 | 3.9526 | 0.1386 | 44.8865  |
| family. Oxalobacteraceae. id. 2966   | CardioEmbolicStroke | MR Egger                  | 4 | 1.1012 | 0.4027 | 3.0114 | 0.8683 | -0.0112 | 0.0631 | 0.8756 | 0.8950 | 0.6392 | 63.1682  |
| family. Oxalobacteraceae. id. 2966   | CardioEmbolicStroke | Weighted median           | 4 | 0.9964 | 0.8161 | 1.2165 | 0.9718 | -0.0112 | 0.0631 | 0.8756 | 0.8950 | 0.6392 | 63.1682  |
| family. Oxalobacteraceae. id. 2966   | CardioEmbolicStroke | Inverse variance weighted | 4 | 1.0068 | 0.8490 | 1.1939 | 0.9383 | -0.0112 | 0.0631 | 0.8756 | 0.8950 | 0.6392 | 63.1682  |
| family. Oxalobacteraceae. id. 2966   | CardioEmbolicStroke | Simple mode               | 4 | 0.9587 | 0.7338 | 1.2525 | 0.7773 | -0.0112 | 0.0631 | 0.8756 | 0.8950 | 0.6392 | 63.1682  |
| family. Oxalobacteraceae. id. 2966   | CardioEmbolicStroke | Weighted mode             | 4 | 0.9509 | 0.7135 | 1.2673 | 0.7538 | -0.0112 | 0.0631 | 0.8756 | 0.8950 | 0.6392 | 63.1682  |
| family. Oxalobacteraceae. id. 2966   | IschemicStroke      | MR Egger                  | 4 | 1.3217 | 0.8552 | 2.0425 | 0.3360 | -0.0376 | 0.0274 | 0.3033 | 2.3946 | 0.4946 | 87.3857  |
| family. Oxalobacteraceae. id. 2966   | IschemicStroke      | Weighted median           | 4 | 0.9635 | 0.8837 | 1.0505 | 0.3991 | -0.0376 | 0.0274 | 0.3033 | 2.3946 | 0.4946 | 87.3857  |
| family. Oxalobacteraceae. id. 2966   | IschemicStroke      | Inverse variance weighted | 4 | 0.9784 | 0.9098 | 1.0523 | 0.5570 | -0.0376 | 0.0274 | 0.3033 | 2.3946 | 0.4946 | 87.3857  |
| family. Oxalobacteraceae. id. 2966   | IschemicStroke      | Simple mode               | 4 | 0.9421 | 0.8303 | 1.0690 | 0.4231 | -0.0376 | 0.0274 | 0.3033 | 2.3946 | 0.4946 | 87.3857  |
| family. Oxalobacteraceae. id. 2966   | IschemicStroke      | Weighted mode             | 4 | 0.9435 | 0.8428 | 1.0562 | 0.3869 | -0.0376 | 0.0274 | 0.3033 | 2.3946 | 0.4946 | 87.3857  |
| family. Oxalobacteraceae. id. 2966   | LargeArteryStroke   | MR Egger                  | 4 | 0.3390 | 0.0872 | 1.3174 | 0.2587 | 0.1411  | 0.0851 | 0.2391 | 2.9238 | 0.4035 | 24.7923  |
| family. Oxalobacteraceae. id. 2966   | LargeArteryStroke   | Weighted median           | 4 | 0.9809 | 0.7364 | 1.3065 | 0.8950 | 0.1411  | 0.0851 | 0.2391 | 2.9238 | 0.4035 | 24.7923  |
| family. Oxalobacteraceae. id. 2966   | LargeArteryStroke   | Inverse variance weighted | 4 | 1.0522 | 0.8408 | 1.3168 | 0.6564 | 0.1411  | 0.0851 | 0.2391 | 2.9238 | 0.4035 | 24.7923  |
| family. Oxalobacteraceae. id. 2966   | LargeArteryStroke   | Simple mode               | 4 | 0.9569 | 0.6450 | 1.4196 | 0.8407 | 0.1411  | 0.0851 | 0.2391 | 2.9238 | 0.4035 | 24.7923  |
| family. Oxalobacteraceae. id. 2966   | LargeArteryStroke   | Weighted mode             | 4 | 0.9663 | 0.6618 | 1.4109 | 0.8704 | 0.1411  | 0.0851 | 0.2391 | 2.9238 | 0.4035 | 24.7923  |
| family. Oxalobacteraceae. id. 2966   | SmallVesselStroke   | MR Egger                  | 4 | 0.8595 | 0.2473 | 2.9872 | 0.8339 | -0.0094 | 0.0781 | 0.9151 | 0.0364 | 0.9820 | 17.7005  |
| family. Oxalobacteraceae. id. 2966   | SmallVesselStroke   | Weighted median           | 4 | 0.7946 | 0.6223 | 1.0146 | 0.0653 | -0.0094 | 0.0781 | 0.9151 | 0.0364 | 0.9820 | 17.7005  |
| family. Oxalobacteraceae. id. 2966   | SmallVesselStroke   | Inverse variance weighted | 4 | 0.7969 | 0.6480 | 0.9800 | 0.0315 | -0.0094 | 0.0781 | 0.9151 | 0.0364 | 0.9820 | 17.7005  |
| family. Oxalobacteraceae. id. 2966   | SmallVesselStroke   | Simple mode               | 4 | 0.7812 | 0.5756 | 1.0601 | 0.2111 | -0.0094 | 0.0781 | 0.9151 | 0.0364 | 0.9820 | 17.7005  |
| family. Oxalobacteraceae. id. 2966   | SmallVesselStroke   | Weighted mode             | 4 | 0.7812 | 0.5804 | 1.0514 | 0.2017 | -0.0094 | 0.0781 | 0.9151 | 0.0364 | 0.9820 | 17.7005  |
| family. Oxalobacteraceae. id. 2966   | Stroke              | MR Egger                  | 4 | 1.3179 | 0.8827 | 1.9678 | 0.3096 | -0.0346 | 0.0252 | 0.3036 | 1.9126 | 0.5907 | 111.1389 |
| family. Oxalobacteraceae. id. 2966   | Stroke              | Weighted median           | 4 | 1.0027 | 0.9262 | 1.0854 | 0.9474 | -0.0346 | 0.0252 | 0.3036 | 1.9126 | 0.5907 | 111.1389 |
| family. Oxalobacteraceae. id. 2966   | Stroke              | Inverse variance weighted | 4 | 0.9993 | 0.9344 | 1.0687 | 0.9844 | -0.0346 | 0.0252 | 0.3036 | 1.9126 | 0.5907 | 111.1389 |
| family. Oxalobacteraceae. id. 2966   | Stroke              | Simple mode               | 4 | 1.0106 | 0.9052 | 1.1282 | 0.8632 | -0.0346 | 0.0252 | 0.3036 | 1.9126 | 0.5907 | 111.1389 |
| family. Oxalobacteraceae. id. 2966   | Stroke              | Weighted mode             | 4 | 1.0063 | 0.8944 | 1.1322 | 0.9232 | -0.0346 | 0.0252 | 0.3036 | 1.9126 | 0.5907 | 111.1389 |
| family. Pasteurellaceae. id. 3689    | CardioEmbolicStroke | MR Egger                  | 4 | 1.7775 | 1.0553 | 2.9939 | 0.1631 | -0.0545 | 0.0345 | 0.2551 | 2.6468 | 0.4493 | 15.0777  |
| family. Pasteurellaceae. id. 3689    | CardioEmbolicStroke | Weighted median           | 4 | 1.2249 | 0.9422 | 1.5924 | 0.1297 | -0.0545 | 0.0345 | 0.2551 | 2.6468 | 0.4493 | 15.0777  |
| family. Pasteurellaceae. id. 3689    | CardioEmbolicStroke | Inverse variance weighted | 4 | 1.2067 | 0.9864 | 1.4762 | 0.0677 | -0.0545 | 0.0345 | 0.2551 | 2.6468 | 0.4493 | 15.0777  |
| family. Pasteurellaceae. id. 3689    | CardioEmbolicStroke | Simple mode               | 4 | 1.2371 | 0.8599 | 1.7799 | 0.3348 | -0.0545 | 0.0345 | 0.2551 | 2.6468 | 0.4493 | 15.0777  |
| family. Pasteurellaceae. id. 3689    | CardioEmbolicStroke | Weighted mode             | 4 | 1.3232 | 0.9677 | 1.8094 | 0.1777 | -0.0545 | 0.0345 | 0.2551 | 2.6468 | 0.4493 | 15.0777  |
| family. Pasteurellaceae. id. 3689    | IschemicStroke      | MR Egger                  | 4 | 0.9116 | 0.7298 | 1.1387 | 0.5004 | 0.0118  | 0.0149 | 0.5105 | 0.9936 | 0.8028 | 180.5307 |
| family. Pasteurellaceae. id. 3689    | IschemicStroke      | Weighted median           | 4 | 0.9756 | 0.8797 | 1.0820 | 0.6403 | 0.0118  | 0.0149 | 0.5105 | 0.9936 | 0.8028 | 180.5307 |
| family. Pasteurellaceae. id. 3689    | IschemicStroke      | Inverse variance weighted | 4 | 0.9903 | 0.9074 | 1.0808 | 0.8275 | 0.0118  | 0.0149 | 0.5105 | 0.9936 | 0.8028 | 180.5307 |
| family. Pasteurellaceae. id. 3689    | IschemicStroke      | Simple mode               | 4 | 0.9714 | 0.8502 | 1.1099 | 0.6981 | 0.0118  | 0.0149 | 0.5105 | 0.9936 | 0.8028 | 180.5307 |
| family. Pasteurellaceae. id. 3689    | IschemicStroke      | Weighted mode             | 4 | 0.9709 | 0.8604 | 1.0956 | 0.6648 | 0.0118  | 0.0149 | 0.5105 | 0.9936 | 0.8028 | 180.5307 |
| family. Pasteurellaceae. id. 3689    | LargeArteryStroke   | MR Egger                  | 4 | 0.7399 | 0.2958 | 1.8510 | 0.5856 | 0.0528  | 0.0605 | 0.4750 | 3.3871 | 0.1839 | 12.2083  |
| family. Pasteurellaceae. id. 3689    | LargeArteryStroke   | Weighted median           | 4 | 1.0224 | 0.7090 | 1.4743 | 0.9056 | 0.0528  | 0.0605 | 0.4750 | 3.3871 | 0.1839 | 12.2083  |
| family. Pasteurellaceae. id. 3689    | LargeArteryStroke   | Inverse variance weighted | 4 | 1.0774 | 0.7646 | 1.5183 | 0.6700 | 0.0528  | 0.0605 | 0.4750 | 3.3871 | 0.1839 | 12.2083  |
| family. Pasteurellaceae. id. 3689    | LargeArteryStroke   | Simple mode               | 4 | 1.0444 | 0.5854 | 1.8635 | 0.8924 | 0.0528  | 0.0605 | 0.4750 | 3.3871 | 0.1839 | 12.2083  |
| family. Pasteurellaceae. id. 3689    | LargeArteryStroke   | Weighted mode             | 4 | 0.9167 | 0.6421 | 1.3087 | 0.6648 | 0.0528  | 0.0605 | 0.4750 | 3.3871 | 0.1839 | 12.2083  |
| family. Pasteurellaceae. id. 3689    | SmallVesselStroke   | MR Egger                  | 4 | 1.2247 | 0.6314 | 2.3758 | 0.6096 | -0.0061 | 0.0436 | 0.9019 | 0.7548 | 0.6856 | 24.8171  |
| family. Pasteurellaceae. id. 3689    | SmallVesselStroke   | Weighted median           | 4 | 1.2288 | 0.9067 | 1.6654 | 0.1840 | -0.0061 | 0.0436 | 0.9019 | 0.7548 | 0.6856 | 24.8171  |
| family. Pasteurellaceae. id. 3689    | SmallVesselStroke   | Inverse variance weighted | 4 | 1.1726 | 0.9072 | 1.5157 | 0.2238 | -0.0061 | 0.0436 | 0.9019 | 0.7548 | 0.6856 | 24.8171  |
| family. Pasteurellaceae. id. 3689    | SmallVesselStroke   | Simple mode               | 4 | 1.2491 | 0.8253 | 1.8905 | 0.3701 | -0.0061 | 0.0436 | 0.9019 | 0.7548 | 0.6856 | 24.8171  |
| family. Pasteurellaceae. id. 3689    | SmallVesselStroke   | Weighted mode             | 4 | 1.2537 | 0.8530 | 1.8426 | 0.3332 | -0.0061 | 0.0436 | 0.9019 | 0.7548 | 0.6856 | 24.8171  |
| family. Pasteurellaceae. id. 3689    | Stroke              | MR Egger                  | 4 | 1.0036 | 0.8174 | 1.2321 | 0.9759 | -0.0034 | 0.0137 | 0.8283 | 0.0272 | 0.9865 | 346.4280 |
| family. Pasteurellaceae. id. 3689    | Stroke              | Weighted median           | 4 | 0.9760 | 0.8876 | 1.0731 | 0.6156 | -0.0034 | 0.0137 | 0.8283 | 0.0272 | 0.9865 | 346.4280 |
| family. Pasteurellaceae. id. 3689    | Stroke              | Inverse variance weighted | 4 | 0.9801 | 0.9041 | 1.0624 | 0.6246 | -0.0034 | 0.0137 | 0.8283 | 0.0272 | 0.9865 | 346.4280 |

|                                         |                     |                           |   |        |        |        |        |         |        |        |        |        |          |
|-----------------------------------------|---------------------|---------------------------|---|--------|--------|--------|--------|---------|--------|--------|--------|--------|----------|
| family. Pasteurellaceae. id. 3689       | Stroke              | Simple mode               | 4 | 0.9706 | 0.8569 | 1.0994 | 0.6709 | -0.0034 | 0.0137 | 0.8283 | 0.0272 | 0.9865 | 346.4280 |
| family. Pasteurellaceae. id. 3689       | Stroke              | Weighted mode             | 4 | 0.9930 | 0.8858 | 1.1130 | 0.9111 | -0.0034 | 0.0137 | 0.8283 | 0.0272 | 0.9865 | 346.4280 |
| family. Peptococcaceae. id. 2024        | CardioEmbolicStroke | MR Egger                  | 5 | 0.7260 | 0.5036 | 1.0466 | 0.1846 | 0.0323  | 0.0202 | 0.2082 | 3.0072 | 0.5566 | 30.2601  |
| family. Peptococcaceae. id. 2024        | CardioEmbolicStroke | Weighted median           | 5 | 0.8715 | 0.6892 | 1.1021 | 0.2509 | 0.0323  | 0.0202 | 0.2082 | 3.0072 | 0.5566 | 30.2601  |
| family. Peptococcaceae. id. 2024        | CardioEmbolicStroke | Inverse variance weighted | 5 | 0.9405 | 0.7842 | 1.1279 | 0.5080 | 0.0323  | 0.0202 | 0.2082 | 3.0072 | 0.5566 | 30.2601  |
| family. Peptococcaceae. id. 2024        | CardioEmbolicStroke | Simple mode               | 5 | 1.1316 | 0.8020 | 1.5966 | 0.5203 | 0.0323  | 0.0202 | 0.2082 | 3.0072 | 0.5566 | 30.2601  |
| family. Peptococcaceae. id. 2024        | CardioEmbolicStroke | Weighted mode             | 5 | 0.8479 | 0.6562 | 1.0958 | 0.2759 | 0.0323  | 0.0202 | 0.2082 | 3.0072 | 0.5566 | 30.2601  |
| family. Peptococcaceae. id. 2024        | IschemicStroke      | MR Egger                  | 5 | 0.7652 | 0.5942 | 0.9856 | 0.1299 | 0.0187  | 0.0137 | 0.2641 | #####  | 0.0204 | 26.0578  |
| family. Peptococcaceae. id. 2024        | IschemicStroke      | Weighted median           | 5 | 0.9015 | 0.8005 | 1.0152 | 0.0870 | 0.0187  | 0.0137 | 0.2641 | #####  | 0.0204 | 26.0578  |
| family. Peptococcaceae. id. 2024        | IschemicStroke      | Inverse variance weighted | 5 | 0.8930 | 0.7789 | 1.0237 | 0.1044 | 0.0187  | 0.0137 | 0.2641 | #####  | 0.0204 | 26.0578  |
| family. Peptococcaceae. id. 2024        | IschemicStroke      | Simple mode               | 5 | 0.9233 | 0.7609 | 1.1204 | 0.4642 | 0.0187  | 0.0137 | 0.2641 | #####  | 0.0204 | 26.0578  |
| family. Peptococcaceae. id. 2024        | IschemicStroke      | Weighted mode             | 5 | 0.8928 | 0.7759 | 1.0274 | 0.1887 | 0.0187  | 0.0137 | 0.2641 | #####  | 0.0204 | 26.0578  |
| family. Peptococcaceae. id. 2024        | LargeArteryStroke   | MR Egger                  | 5 | 0.7952 | 0.3574 | 1.7695 | 0.6137 | 0.0398  | 0.0434 | 0.4273 | 9.2991 | 0.0540 | 10.9478  |
| family. Peptococcaceae. id. 2024        | LargeArteryStroke   | Weighted median           | 5 | 1.0773 | 0.7621 | 1.5229 | 0.6731 | 0.0398  | 0.0434 | 0.4273 | 9.2991 | 0.0540 | 10.9478  |
| family. Peptococcaceae. id. 2024        | LargeArteryStroke   | Inverse variance weighted | 5 | 1.1001 | 0.7461 | 1.6222 | 0.6301 | 0.0398  | 0.0434 | 0.4273 | 9.2991 | 0.0540 | 10.9478  |
| family. Peptococcaceae. id. 2024        | LargeArteryStroke   | Simple mode               | 5 | 1.0876 | 0.6494 | 1.8215 | 0.7656 | 0.0398  | 0.0434 | 0.4273 | 9.2991 | 0.0540 | 10.9478  |
| family. Peptococcaceae. id. 2024        | LargeArteryStroke   | Weighted mode             | 5 | 1.0825 | 0.7532 | 1.5559 | 0.6903 | 0.0398  | 0.0434 | 0.4273 | 9.2991 | 0.0540 | 10.9478  |
| family. Peptococcaceae. id. 2024        | SmallVesselStroke   | MR Egger                  | 5 | 0.7926 | 0.4565 | 1.3760 | 0.4694 | 0.0277  | 0.0300 | 0.4232 | 4.2428 | 0.2364 | 21.3817  |
| family. Peptococcaceae. id. 2024        | SmallVesselStroke   | Weighted median           | 5 | 0.9692 | 0.7230 | 1.2993 | 0.8344 | 0.0277  | 0.0300 | 0.4232 | 4.2428 | 0.2364 | 21.3817  |
| family. Peptococcaceae. id. 2024        | SmallVesselStroke   | Inverse variance weighted | 5 | 0.9939 | 0.7605 | 1.2990 | 0.9643 | 0.0277  | 0.0300 | 0.4232 | 4.2428 | 0.2364 | 21.3817  |
| family. Peptococcaceae. id. 2024        | SmallVesselStroke   | Simple mode               | 5 | 0.8368 | 0.5276 | 1.3271 | 0.4910 | 0.0277  | 0.0300 | 0.4232 | 4.2428 | 0.2364 | 21.3817  |
| family. Peptococcaceae. id. 2024        | SmallVesselStroke   | Weighted mode             | 5 | 0.9473 | 0.6655 | 1.3483 | 0.7786 | 0.0277  | 0.0300 | 0.4232 | 4.2428 | 0.2364 | 21.3817  |
| family. Peptococcaceae. id. 2024        | Stroke              | MR Egger                  | 5 | 0.7707 | 0.5975 | 0.9940 | 0.1385 | 0.0188  | 0.0138 | 0.2664 | #####  | 0.0082 | 27.3277  |
| family. Peptococcaceae. id. 2024        | Stroke              | Weighted median           | 5 | 0.9102 | 0.8169 | 1.0140 | 0.0877 | 0.0188  | 0.0138 | 0.2664 | #####  | 0.0082 | 27.3277  |
| family. Peptococcaceae. id. 2024        | Stroke              | Inverse variance weighted | 5 | 0.8992 | 0.7841 | 1.0313 | 0.1287 | 0.0188  | 0.0138 | 0.2664 | #####  | 0.0082 | 27.3277  |
| family. Peptococcaceae. id. 2024        | Stroke              | Simple mode               | 5 | 0.9293 | 0.7836 | 1.1021 | 0.4467 | 0.0188  | 0.0138 | 0.2664 | #####  | 0.0082 | 27.3277  |
| family. Peptococcaceae. id. 2024        | Stroke              | Weighted mode             | 5 | 0.9013 | 0.7980 | 1.0180 | 0.1698 | 0.0188  | 0.0138 | 0.2664 | #####  | 0.0082 | 27.3277  |
| family. Peptostreptococcaceae. id. 2042 | CardioEmbolicStroke | MR Egger                  | 4 | 0.9336 | 0.5681 | 1.5343 | 0.8118 | 0.0130  | 0.0243 | 0.6463 | 0.9058 | 0.6358 | 52.3471  |
| family. Peptostreptococcaceae. id. 2042 | CardioEmbolicStroke | Weighted median           | 4 | 1.0134 | 0.7602 | 1.3509 | 0.9279 | 0.0130  | 0.0243 | 0.6463 | 0.9058 | 0.6358 | 52.3471  |
| family. Peptostreptococcaceae. id. 2042 | CardioEmbolicStroke | Inverse variance weighted | 4 | 1.0515 | 0.8282 | 1.3349 | 0.6802 | 0.0130  | 0.0243 | 0.6463 | 0.9058 | 0.6358 | 52.3471  |
| family. Peptostreptococcaceae. id. 2042 | CardioEmbolicStroke | Simple mode               | 4 | 0.9800 | 0.6713 | 1.4307 | 0.9234 | 0.0130  | 0.0243 | 0.6463 | 0.9058 | 0.6358 | 52.3471  |
| family. Peptostreptococcaceae. id. 2042 | CardioEmbolicStroke | Weighted mode             | 4 | 0.9800 | 0.7162 | 1.3410 | 0.9077 | 0.0130  | 0.0243 | 0.6463 | 0.9058 | 0.6358 | 52.3471  |
| family. Peptostreptococcaceae. id. 2042 | IschemicStroke      | MR Egger                  | 4 | 0.9892 | 0.8024 | 1.2194 | 0.9282 | -0.0014 | 0.0105 | 0.9064 | 1.3230 | 0.5161 | 134.0936 |
| family. Peptostreptococcaceae. id. 2042 | IschemicStroke      | Weighted median           | 4 | 0.9727 | 0.8596 | 1.1007 | 0.6609 | -0.0014 | 0.0105 | 0.9064 | 1.3230 | 0.5161 | 134.0936 |
| family. Peptostreptococcaceae. id. 2042 | IschemicStroke      | Inverse variance weighted | 4 | 0.9770 | 0.8816 | 1.0828 | 0.6579 | -0.0014 | 0.0105 | 0.9064 | 1.3230 | 0.5161 | 134.0936 |
| family. Peptostreptococcaceae. id. 2042 | IschemicStroke      | Simple mode               | 4 | 0.9562 | 0.8108 | 1.1276 | 0.6313 | -0.0014 | 0.0105 | 0.9064 | 1.3230 | 0.5161 | 134.0936 |
| family. Peptostreptococcaceae. id. 2042 | IschemicStroke      | Weighted mode             | 4 | 0.9708 | 0.8489 | 1.1103 | 0.6949 | -0.0014 | 0.0105 | 0.9064 | 1.3230 | 0.5161 | 134.0936 |
| family. Peptostreptococcaceae. id. 2042 | LargeArteryStroke   | MR Egger                  | 4 | 1.1060 | 0.5649 | 2.1652 | 0.7966 | 0.0016  | 0.0330 | 0.9651 | 0.7349 | 0.6925 | 29.4104  |
| family. Peptostreptococcaceae. id. 2042 | LargeArteryStroke   | Weighted median           | 4 | 1.1255 | 0.7649 | 1.6563 | 0.5485 | 0.0016  | 0.0330 | 0.9651 | 0.7349 | 0.6925 | 29.4104  |
| family. Peptostreptococcaceae. id. 2042 | LargeArteryStroke   | Inverse variance weighted | 4 | 1.1225 | 0.8125 | 1.5507 | 0.4834 | 0.0016  | 0.0330 | 0.9651 | 0.7349 | 0.6925 | 29.4104  |
| family. Peptostreptococcaceae. id. 2042 | LargeArteryStroke   | Simple mode               | 4 | 1.1133 | 0.6770 | 1.8308 | 0.7008 | 0.0016  | 0.0330 | 0.9651 | 0.7349 | 0.6925 | 29.4104  |
| family. Peptostreptococcaceae. id. 2042 | LargeArteryStroke   | Weighted mode             | 4 | 1.1133 | 0.7178 | 1.7267 | 0.6644 | 0.0016  | 0.0330 | 0.9651 | 0.7349 | 0.6925 | 29.4104  |
| family. Peptostreptococcaceae. id. 2042 | SmallVesselStroke   | MR Egger                  | 4 | 0.8133 | 0.4250 | 1.5562 | 0.5962 | -0.0041 | 0.0312 | 0.9066 | 0.6225 | 0.7325 | 16.9075  |
| family. Peptostreptococcaceae. id. 2042 | SmallVesselStroke   | Weighted median           | 4 | 0.7653 | 0.5252 | 1.1154 | 0.1640 | -0.0041 | 0.0312 | 0.9066 | 0.6225 | 0.7325 | 16.9075  |
| family. Peptostreptococcaceae. id. 2042 | SmallVesselStroke   | Inverse variance weighted | 4 | 0.7823 | 0.5765 | 1.0616 | 0.1150 | -0.0041 | 0.0312 | 0.9066 | 0.6225 | 0.7325 | 16.9075  |
| family. Peptostreptococcaceae. id. 2042 | SmallVesselStroke   | Simple mode               | 4 | 0.7221 | 0.4633 | 1.1255 | 0.2460 | -0.0041 | 0.0312 | 0.9066 | 0.6225 | 0.7325 | 16.9075  |
| family. Peptostreptococcaceae. id. 2042 | SmallVesselStroke   | Weighted mode             | 4 | 0.7604 | 0.5090 | 1.1358 | 0.2733 | -0.0041 | 0.0312 | 0.9066 | 0.6225 | 0.7325 | 16.9075  |
| family. Peptostreptococcaceae. id. 2042 | Stroke              | MR Egger                  | 4 | 1.0550 | 0.8702 | 1.2791 | 0.6402 | -0.0055 | 0.0097 | 0.6278 | 1.2051 | 0.5474 | 134.6346 |
| family. Peptostreptococcaceae. id. 2042 | Stroke              | Weighted median           | 4 | 1.0120 | 0.9073 | 1.1288 | 0.8303 | -0.0055 | 0.0097 | 0.6278 | 1.2051 | 0.5474 | 134.6346 |
| family. Peptostreptococcaceae. id. 2042 | Stroke              | Inverse variance weighted | 4 | 1.0051 | 0.9142 | 1.1051 | 0.9163 | -0.0055 | 0.0097 | 0.6278 | 1.2051 | 0.5474 | 134.6346 |
| family. Peptostreptococcaceae. id. 2042 | Stroke              | Simple mode               | 4 | 1.0163 | 0.8736 | 1.1824 | 0.8473 | -0.0055 | 0.0097 | 0.6278 | 1.2051 | 0.5474 | 134.6346 |
| family. Peptostreptococcaceae. id. 2042 | Stroke              | Weighted mode             | 4 | 1.0197 | 0.9036 | 1.1507 | 0.7722 | -0.0055 | 0.0097 | 0.6278 | 1.2051 | 0.5474 | 134.6346 |
| family. Prevotellaceae. id. 960         | CardioEmbolicStroke | Inverse variance weighted | 2 | 1.0841 | 0.6130 | 1.9174 | 0.7812 | NA      | NA     | NA     | 1.8332 | 0.1757 | 6.8493   |
| family. Prevotellaceae. id. 960         | IschemicStroke      | Inverse variance weighted | 2 | 1.1115 | 0.9187 | 1.3447 | 0.2769 | NA      | NA     | NA     | 0.1556 | 0.6933 | 24.1401  |

|                                     |                     |                           |   |        |        |          |        |         |        |        |        |        |          |
|-------------------------------------|---------------------|---------------------------|---|--------|--------|----------|--------|---------|--------|--------|--------|--------|----------|
| family. Prevotellaceae. id. 960     | LargeArteryStroke   | Inverse variance weighted | 2 | 0.6351 | 0.3668 | 1.0999   | 0.1052 | NA      | NA     | NA     | 0.3014 | 0.5830 | 3.4497   |
| family. Prevotellaceae. id. 960     | SmallVesselStroke   | Inverse variance weighted | 2 | 0.9611 | 0.5734 | 1.6107   | 0.8801 | NA      | NA     | NA     | 0.9744 | 0.3236 | 8.2626   |
| family. Prevotellaceae. id. 960     | Stroke              | Inverse variance weighted | 2 | 1.1091 | 0.9332 | 1.3180   | 0.2398 | NA      | NA     | NA     | 0.3584 | 0.5494 | 22.9802  |
| family. Rhodospirillaceae. id. 2717 | CardioEmbolicStroke | MR Egger                  | 3 | 0.4161 | 0.0265 | 6.5464   | 0.6450 | 0.0545  | 0.1182 | 0.7249 | 1.2235 | 0.2687 | 8.4955   |
| family. Rhodospirillaceae. id. 2717 | CardioEmbolicStroke | Weighted median           | 3 | 0.8792 | 0.6253 | 1.2362   | 0.4590 | 0.0545  | 0.1182 | 0.7249 | 1.2235 | 0.2687 | 8.4955   |
| family. Rhodospirillaceae. id. 2717 | CardioEmbolicStroke | Inverse variance weighted | 3 | 0.7930 | 0.6111 | 1.0292   | 0.0812 | 0.0545  | 0.1182 | 0.7249 | 1.2235 | 0.2687 | 8.4955   |
| family. Rhodospirillaceae. id. 2717 | CardioEmbolicStroke | Simple mode               | 3 | 0.8929 | 0.5724 | 1.3927   | 0.6669 | 0.0545  | 0.1182 | 0.7249 | 1.2235 | 0.2687 | 8.4955   |
| family. Rhodospirillaceae. id. 2717 | CardioEmbolicStroke | Weighted mode             | 3 | 0.8929 | 0.5974 | 1.3344   | 0.6359 | 0.0545  | 0.1182 | 0.7249 | 1.2235 | 0.2687 | 8.4955   |
| family. Rhodospirillaceae. id. 2717 | IschemicStroke      | MR Egger                  | 3 | 1.0553 | 0.3567 | 3.1219   | 0.9383 | -0.0042 | 0.0466 | 0.9422 | 0.0895 | 0.7648 | 191.5987 |
| family. Rhodospirillaceae. id. 2717 | IschemicStroke      | Weighted median           | 3 | 0.9998 | 0.8753 | 1.1419   | 0.9971 | -0.0042 | 0.0466 | 0.9422 | 0.0895 | 0.7648 | 191.5987 |
| family. Rhodospirillaceae. id. 2717 | IschemicStroke      | Inverse variance weighted | 3 | 1.0037 | 0.8965 | 1.1238   | 0.9486 | -0.0042 | 0.0466 | 0.9422 | 0.0895 | 0.7648 | 191.5987 |
| family. Rhodospirillaceae. id. 2717 | IschemicStroke      | Simple mode               | 3 | 0.9951 | 0.8570 | 1.1554   | 0.9543 | -0.0042 | 0.0466 | 0.9422 | 0.0895 | 0.7648 | 191.5987 |
| family. Rhodospirillaceae. id. 2717 | IschemicStroke      | Weighted mode             | 3 | 0.9943 | 0.8600 | 1.1496   | 0.9453 | -0.0042 | 0.0466 | 0.9422 | 0.0895 | 0.7648 | 191.5987 |
| family. Rhodospirillaceae. id. 2717 | LargeArteryStroke   | MR Egger                  | 3 | 0.8665 | 0.0304 | 24.7176  | 0.9467 | 0.0154  | 0.1438 | 0.9321 | 0.0158 | 0.8999 | 76.2845  |
| family. Rhodospirillaceae. id. 2717 | LargeArteryStroke   | Weighted median           | 3 | 1.0451 | 0.6877 | 1.5882   | 0.8364 | 0.0154  | 0.1438 | 0.9321 | 0.0158 | 0.8999 | 76.2845  |
| family. Rhodospirillaceae. id. 2717 | LargeArteryStroke   | Inverse variance weighted | 3 | 1.0394 | 0.7311 | 1.4777   | 0.8296 | 0.0154  | 0.1438 | 0.9321 | 0.0158 | 0.8999 | 76.2845  |
| family. Rhodospirillaceae. id. 2717 | LargeArteryStroke   | Simple mode               | 3 | 1.0557 | 0.6781 | 1.6434   | 0.8328 | 0.0154  | 0.1438 | 0.9321 | 0.0158 | 0.8999 | 76.2845  |
| family. Rhodospirillaceae. id. 2717 | LargeArteryStroke   | Weighted mode             | 3 | 1.0537 | 0.6793 | 1.6347   | 0.8370 | 0.0154  | 0.1438 | 0.9321 | 0.0158 | 0.8999 | 76.2845  |
| family. Rhodospirillaceae. id. 2717 | SmallVesselStroke   | MR Egger                  | 3 | 2.2137 | 0.0188 | 260.1824 | 0.7990 | -0.0750 | 0.2048 | 0.7765 | 2.3266 | 0.1272 | 8.3846   |
| family. Rhodospirillaceae. id. 2717 | SmallVesselStroke   | Weighted median           | 3 | 0.8523 | 0.5565 | 1.3052   | 0.4623 | -0.0750 | 0.2048 | 0.7765 | 2.3266 | 0.1272 | 8.3846   |
| family. Rhodospirillaceae. id. 2717 | SmallVesselStroke   | Inverse variance weighted | 3 | 0.9129 | 0.6277 | 1.3276   | 0.6334 | -0.0750 | 0.2048 | 0.7765 | 2.3266 | 0.1272 | 8.3846   |
| family. Rhodospirillaceae. id. 2717 | SmallVesselStroke   | Simple mode               | 3 | 0.7816 | 0.4455 | 1.3714   | 0.4809 | -0.0750 | 0.2048 | 0.7765 | 2.3266 | 0.1272 | 8.3846   |
| family. Rhodospirillaceae. id. 2717 | SmallVesselStroke   | Weighted mode             | 3 | 0.7786 | 0.4376 | 1.3854   | 0.4843 | -0.0750 | 0.2048 | 0.7765 | 2.3266 | 0.1272 | 8.3846   |
| family. Rhodospirillaceae. id. 2717 | Stroke              | MR Egger                  | 3 | 1.3808 | 0.5073 | 3.7590   | 0.6414 | -0.0280 | 0.0430 | 0.6324 | 0.0811 | 0.7758 | 100.3211 |
| family. Rhodospirillaceae. id. 2717 | Stroke              | Weighted median           | 3 | 1.0061 | 0.8836 | 1.1457   | 0.9267 | -0.0280 | 0.0430 | 0.6324 | 0.0811 | 0.7758 | 100.3211 |
| family. Rhodospirillaceae. id. 2717 | Stroke              | Inverse variance weighted | 3 | 0.9916 | 0.8932 | 1.1009   | 0.8748 | -0.0280 | 0.0430 | 0.6324 | 0.0811 | 0.7758 | 100.3211 |
| family. Rhodospirillaceae. id. 2717 | Stroke              | Simple mode               | 3 | 1.0156 | 0.8801 | 1.1719   | 0.8521 | -0.0280 | 0.0430 | 0.6324 | 0.0811 | 0.7758 | 100.3211 |
| family. Rhodospirillaceae. id. 2717 | Stroke              | Weighted mode             | 3 | 1.0156 | 0.8804 | 1.1715   | 0.8518 | -0.0280 | 0.0430 | 0.6324 | 0.0811 | 0.7758 | 100.3211 |
| family. Rikenellaceae. id. 967      | CardioEmbolicStroke | MR Egger                  | 4 | 0.5859 | 0.1972 | 1.7406   | 0.4374 | 0.0753  | 0.0597 | 0.3343 | 2.3145 | 0.5097 | 18.6376  |
| family. Rikenellaceae. id. 967      | CardioEmbolicStroke | Weighted median           | 4 | 1.0603 | 0.7281 | 1.5441   | 0.7602 | 0.0753  | 0.0597 | 0.3343 | 2.3145 | 0.5097 | 18.6376  |
| family. Rikenellaceae. id. 967      | CardioEmbolicStroke | Inverse variance weighted | 4 | 1.1496 | 0.8532 | 1.5490   | 0.3595 | 0.0753  | 0.0597 | 0.3343 | 2.3145 | 0.5097 | 18.6376  |
| family. Rikenellaceae. id. 967      | CardioEmbolicStroke | Simple mode               | 4 | 1.0328 | 0.6318 | 1.6883   | 0.9057 | 0.0753  | 0.0597 | 0.3343 | 2.3145 | 0.5097 | 18.6376  |
| family. Rikenellaceae. id. 967      | CardioEmbolicStroke | Weighted mode             | 4 | 1.0278 | 0.6484 | 1.6290   | 0.9146 | 0.0753  | 0.0597 | 0.3343 | 2.3145 | 0.5097 | 18.6376  |
| family. Rikenellaceae. id. 967      | IschemicStroke      | MR Egger                  | 4 | 1.0173 | 0.5405 | 1.9145   | 0.9625 | 0.0034  | 0.0346 | 0.9313 | 3.6413 | 0.1619 | 34.2200  |
| family. Rikenellaceae. id. 967      | IschemicStroke      | Weighted median           | 4 | 1.0423 | 0.8885 | 1.2227   | 0.6110 | 0.0034  | 0.0346 | 0.9313 | 3.6413 | 0.1619 | 34.2200  |
| family. Rikenellaceae. id. 967      | IschemicStroke      | Inverse variance weighted | 4 | 1.0485 | 0.9109 | 1.2069   | 0.5095 | 0.0034  | 0.0346 | 0.9313 | 3.6413 | 0.1619 | 34.2200  |
| family. Rikenellaceae. id. 967      | IschemicStroke      | Simple mode               | 4 | 0.9253 | 0.7059 | 1.2129   | 0.6133 | 0.0034  | 0.0346 | 0.9313 | 3.6413 | 0.1619 | 34.2200  |
| family. Rikenellaceae. id. 967      | IschemicStroke      | Weighted mode             | 4 | 1.1444 | 0.8902 | 1.4714   | 0.3699 | 0.0034  | 0.0346 | 0.9313 | 3.6413 | 0.1619 | 34.2200  |
| family. Rikenellaceae. id. 967      | LargeArteryStroke   | MR Egger                  | 4 | 0.6411 | 0.0451 | 9.1098   | 0.7738 | 0.0701  | 0.1418 | 0.6699 | 6.2602 | 0.0437 | 5.7379   |
| family. Rikenellaceae. id. 967      | LargeArteryStroke   | Weighted median           | 4 | 1.0957 | 0.6279 | 1.9118   | 0.7477 | 0.0701  | 0.1418 | 0.6699 | 6.2602 | 0.0437 | 5.7379   |
| family. Rikenellaceae. id. 967      | LargeArteryStroke   | Inverse variance weighted | 4 | 1.2209 | 0.6526 | 2.2844   | 0.5323 | 0.0701  | 0.1418 | 0.6699 | 6.2602 | 0.0437 | 5.7379   |
| family. Rikenellaceae. id. 967      | LargeArteryStroke   | Simple mode               | 4 | 0.8096 | 0.3467 | 1.8904   | 0.6588 | 0.0701  | 0.1418 | 0.6699 | 6.2602 | 0.0437 | 5.7379   |
| family. Rikenellaceae. id. 967      | LargeArteryStroke   | Weighted mode             | 4 | 1.0098 | 0.4753 | 2.1456   | 0.9813 | 0.0701  | 0.1418 | 0.6699 | 6.2602 | 0.0437 | 5.7379   |
| family. Rikenellaceae. id. 967      | SmallVesselStroke   | MR Egger                  | 3 | 0.9401 | 0.0600 | 14.7396  | 0.9720 | 0.0064  | 0.1418 | 0.9712 | 3.1588 | 0.0755 | 8.2250   |
| family. Rikenellaceae. id. 967      | SmallVesselStroke   | Weighted median           | 3 | 1.0641 | 0.5952 | 1.9024   | 0.8339 | 0.0064  | 0.1418 | 0.9712 | 3.1588 | 0.0755 | 8.2250   |
| family. Rikenellaceae. id. 967      | SmallVesselStroke   | Inverse variance weighted | 3 | 0.9994 | 0.5894 | 1.6945   | 0.9982 | 0.0064  | 0.1418 | 0.9712 | 3.1588 | 0.0755 | 8.2250   |
| family. Rikenellaceae. id. 967      | SmallVesselStroke   | Simple mode               | 3 | 1.1661 | 0.5741 | 2.3685   | 0.7122 | 0.0064  | 0.1418 | 0.9712 | 3.1588 | 0.0755 | 8.2250   |
| family. Rikenellaceae. id. 967      | SmallVesselStroke   | Weighted mode             | 3 | 1.1223 | 0.5918 | 2.1283   | 0.7576 | 0.0064  | 0.1418 | 0.9712 | 3.1588 | 0.0755 | 8.2250   |
| family. Rikenellaceae. id. 967      | Stroke              | MR Egger                  | 4 | 0.9818 | 0.5546 | 1.7381   | 0.9555 | 0.0082  | 0.0313 | 0.8168 | 3.5066 | 0.1732 | 40.2394  |
| family. Rikenellaceae. id. 967      | Stroke              | Weighted median           | 4 | 1.0391 | 0.8956 | 1.2057   | 0.6126 | 0.0082  | 0.0313 | 0.8168 | 3.5066 | 0.1732 | 40.2394  |
| family. Rikenellaceae. id. 967      | Stroke              | Inverse variance weighted | 4 | 1.0571 | 0.9291 | 1.2028   | 0.3991 | 0.0082  | 0.0313 | 0.8168 | 3.5066 | 0.1732 | 40.2394  |
| family. Rikenellaceae. id. 967      | Stroke              | Simple mode               | 4 | 0.9568 | 0.7520 | 1.2172   | 0.7428 | 0.0082  | 0.0313 | 0.8168 | 3.5066 | 0.1732 | 40.2394  |
| family. Rikenellaceae. id. 967      | Stroke              | Weighted mode             | 4 | 1.0094 | 0.8224 | 1.2388   | 0.9346 | 0.0082  | 0.0313 | 0.8168 | 3.5066 | 0.1732 | 40.2394  |
| family. Ruminococcaceae. id. 2050   | CardioEmbolicStroke | Inverse variance weighted | 2 | 1.7855 | 0.8728 | 3.6528   | 0.1124 | NA      | NA     | NA     | 2.2691 | 0.1320 | 1.6695   |

|                                    |                     |                           |   |        |        |        |        |        |        |        |        |        |          |
|------------------------------------|---------------------|---------------------------|---|--------|--------|--------|--------|--------|--------|--------|--------|--------|----------|
| family. Ruminococcaceae. id. 2050  | IschemicStroke      | Inverse variance weighted | 2 | 1.1085 | 0.9073 | 1.3543 | 0.3136 | NA     | NA     | NA     | 0.0003 | 0.9851 | 27.3284  |
| family. Ruminococcaceae. id. 2050  | LargeArteryStroke   | Inverse variance weighted | 2 | 1.3716 | 0.7184 | 2.6185 | 0.3382 | NA     | NA     | NA     | 0.0090 | 0.9245 | 6.9280   |
| family. Ruminococcaceae. id. 2050  | SmallVesselStroke   | Inverse variance weighted | 2 | 1.4089 | 0.5213 | 3.8080 | 0.4992 | NA     | NA     | NA     | 2.8307 | 0.0925 | 2.0053   |
| family. Ruminococcaceae. id. 2050  | Stroke              | Inverse variance weighted | 2 | 1.0379 | 0.8622 | 1.2494 | 0.6940 | NA     | NA     | NA     | 0.0930 | 0.7605 | 56.3151  |
| family. Streptococcaceae. id. 1850 | CardioEmbolicStroke | MR Egger                  | 8 | 0.5577 | 0.2614 | 1.1901 | 0.1818 | 0.0673 | 0.0319 | 0.0794 | #####  | 0.1845 | 10.0616  |
| family. Streptococcaceae. id. 1850 | CardioEmbolicStroke | Weighted median           | 8 | 1.0501 | 0.7665 | 1.4387 | 0.7609 | 0.0673 | 0.0319 | 0.0794 | #####  | 0.1845 | 10.0616  |
| family. Streptococcaceae. id. 1850 | CardioEmbolicStroke | Inverse variance weighted | 8 | 1.2144 | 0.9246 | 1.5950 | 0.1627 | 0.0673 | 0.0319 | 0.0794 | #####  | 0.1845 | 10.0616  |
| family. Streptococcaceae. id. 1850 | CardioEmbolicStroke | Simple mode               | 8 | 0.9605 | 0.5852 | 1.5766 | 0.8780 | 0.0673 | 0.0319 | 0.0794 | #####  | 0.1845 | 10.0616  |
| family. Streptococcaceae. id. 1850 | CardioEmbolicStroke | Weighted mode             | 8 | 0.9846 | 0.6322 | 1.5337 | 0.9474 | 0.0673 | 0.0319 | 0.0794 | #####  | 0.1845 | 10.0616  |
| family. Streptococcaceae. id. 1850 | IschemicStroke      | MR Egger                  | 8 | 0.7766 | 0.5586 | 1.0796 | 0.1832 | 0.0191 | 0.0139 | 0.2187 | 4.6935 | 0.6973 | 47.1450  |
| family. Streptococcaceae. id. 1850 | IschemicStroke      | Weighted median           | 8 | 0.9816 | 0.8677 | 1.1105 | 0.7683 | 0.0191 | 0.0139 | 0.2187 | 4.6935 | 0.6973 | 47.1450  |
| family. Streptococcaceae. id. 1850 | IschemicStroke      | Inverse variance weighted | 8 | 0.9681 | 0.8780 | 1.0675 | 0.5158 | 0.0191 | 0.0139 | 0.2187 | 4.6935 | 0.6973 | 47.1450  |
| family. Streptococcaceae. id. 1850 | IschemicStroke      | Simple mode               | 8 | 0.9591 | 0.7878 | 1.1677 | 0.6899 | 0.0191 | 0.0139 | 0.2187 | 4.6935 | 0.6973 | 47.1450  |
| family. Streptococcaceae. id. 1850 | IschemicStroke      | Weighted mode             | 8 | 0.9788 | 0.8149 | 1.1756 | 0.8249 | 0.0191 | 0.0139 | 0.2187 | 4.6935 | 0.6973 | 47.1450  |
| family. Streptococcaceae. id. 1850 | LargeArteryStroke   | MR Egger                  | 8 | 0.4231 | 0.1519 | 1.1781 | 0.1508 | 0.0601 | 0.0433 | 0.2148 | 3.7072 | 0.8128 | 8.6273   |
| family. Streptococcaceae. id. 1850 | LargeArteryStroke   | Weighted median           | 8 | 0.8932 | 0.5833 | 1.3677 | 0.6032 | 0.0601 | 0.0433 | 0.2148 | 3.7072 | 0.8128 | 8.6273   |
| family. Streptococcaceae. id. 1850 | LargeArteryStroke   | Inverse variance weighted | 8 | 0.8441 | 0.6192 | 1.1507 | 0.2836 | 0.0601 | 0.0433 | 0.2148 | 3.7072 | 0.8128 | 8.6273   |
| family. Streptococcaceae. id. 1850 | LargeArteryStroke   | Simple mode               | 8 | 1.0269 | 0.5247 | 2.0099 | 0.9404 | 0.0601 | 0.0433 | 0.2148 | 3.7072 | 0.8128 | 8.6273   |
| family. Streptococcaceae. id. 1850 | LargeArteryStroke   | Weighted mode             | 8 | 1.0489 | 0.5526 | 1.9909 | 0.8880 | 0.0601 | 0.0433 | 0.2148 | 3.7072 | 0.8128 | 8.6273   |
| family. Streptococcaceae. id. 1850 | SmallVesselStroke   | MR Egger                  | 7 | 0.5534 | 0.1504 | 2.0365 | 0.4142 | 0.0594 | 0.0540 | 0.3216 | #####  | 0.0873 | 6.3661   |
| family. Streptococcaceae. id. 1850 | SmallVesselStroke   | Weighted median           | 7 | 1.0871 | 0.7160 | 1.6505 | 0.6952 | 0.0594 | 0.0540 | 0.3216 | #####  | 0.0873 | 6.3661   |
| family. Streptococcaceae. id. 1850 | SmallVesselStroke   | Inverse variance weighted | 7 | 1.1098 | 0.7395 | 1.6654 | 0.6150 | 0.0594 | 0.0540 | 0.3216 | #####  | 0.0873 | 6.3661   |
| family. Streptococcaceae. id. 1850 | SmallVesselStroke   | Simple mode               | 7 | 0.7830 | 0.3688 | 1.6623 | 0.5477 | 0.0594 | 0.0540 | 0.3216 | #####  | 0.0873 | 6.3661   |
| family. Streptococcaceae. id. 1850 | SmallVesselStroke   | Weighted mode             | 7 | 0.9126 | 0.4809 | 1.7320 | 0.7891 | 0.0594 | 0.0540 | 0.3216 | #####  | 0.0873 | 6.3661   |
| family. Streptococcaceae. id. 1850 | Stroke              | MR Egger                  | 8 | 0.8235 | 0.6072 | 1.1171 | 0.2585 | 0.0123 | 0.0129 | 0.3773 | 5.2620 | 0.6280 | 38.6722  |
| family. Streptococcaceae. id. 1850 | Stroke              | Weighted median           | 8 | 0.9966 | 0.8847 | 1.1228 | 0.9556 | 0.0123 | 0.0129 | 0.3773 | 5.2620 | 0.6280 | 38.6722  |
| family. Streptococcaceae. id. 1850 | Stroke              | Inverse variance weighted | 8 | 0.9489 | 0.8678 | 1.0377 | 0.2506 | 0.0123 | 0.0129 | 0.3773 | 5.2620 | 0.6280 | 38.6722  |
| family. Streptococcaceae. id. 1850 | Stroke              | Simple mode               | 8 | 1.0090 | 0.8373 | 1.2158 | 0.9279 | 0.0123 | 0.0129 | 0.3773 | 5.2620 | 0.6280 | 38.6722  |
| family. Streptococcaceae. id. 1850 | Stroke              | Weighted mode             | 8 | 1.0103 | 0.8540 | 1.1953 | 0.9080 | 0.0123 | 0.0129 | 0.3773 | 5.2620 | 0.6280 | 38.6722  |
| family. Victivallaceae. id. 2255   | CardioEmbolicStroke | MR Egger                  | 4 | 0.7137 | 0.3271 | 1.5569 | 0.4859 | 0.0579 | 0.0566 | 0.4144 | 2.1610 | 0.5397 | 37.6242  |
| family. Victivallaceae. id. 2255   | CardioEmbolicStroke | Weighted median           | 4 | 1.1111 | 0.9094 | 1.3575 | 0.3029 | 0.0579 | 0.0566 | 0.4144 | 2.1610 | 0.5397 | 37.6242  |
| family. Victivallaceae. id. 2255   | CardioEmbolicStroke | Inverse variance weighted | 4 | 1.0621 | 0.9024 | 1.2501 | 0.4684 | 0.0579 | 0.0566 | 0.4144 | 2.1610 | 0.5397 | 37.6242  |
| family. Victivallaceae. id. 2255   | CardioEmbolicStroke | Simple mode               | 4 | 1.1189 | 0.8582 | 1.4588 | 0.4675 | 0.0579 | 0.0566 | 0.4144 | 2.1610 | 0.5397 | 37.6242  |
| family. Victivallaceae. id. 2255   | CardioEmbolicStroke | Weighted mode             | 4 | 1.1164 | 0.8481 | 1.4696 | 0.4897 | 0.0579 | 0.0566 | 0.4144 | 2.1610 | 0.5397 | 37.6242  |
| family. Victivallaceae. id. 2255   | IschemicStroke      | MR Egger                  | 4 | 0.9147 | 0.5248 | 1.5942 | 0.7828 | 0.0124 | 0.0405 | 0.7881 | 5.3744 | 0.0681 | 71.6896  |
| family. Victivallaceae. id. 2255   | IschemicStroke      | Weighted median           | 4 | 0.9826 | 0.8979 | 1.0754 | 0.7036 | 0.0124 | 0.0405 | 0.7881 | 5.3744 | 0.0681 | 71.6896  |
| family. Victivallaceae. id. 2255   | IschemicStroke      | Inverse variance weighted | 4 | 0.9959 | 0.9056 | 1.0952 | 0.9326 | 0.0124 | 0.0405 | 0.7881 | 5.3744 | 0.0681 | 71.6896  |
| family. Victivallaceae. id. 2255   | IschemicStroke      | Simple mode               | 4 | 0.9317 | 0.7901 | 1.0986 | 0.4617 | 0.0124 | 0.0405 | 0.7881 | 5.3744 | 0.0681 | 71.6896  |
| family. Victivallaceae. id. 2255   | IschemicStroke      | Weighted mode             | 4 | 0.9382 | 0.7986 | 1.1021 | 0.4940 | 0.0124 | 0.0405 | 0.7881 | 5.3744 | 0.0681 | 71.6896  |
| family. Victivallaceae. id. 2255   | LargeArteryStroke   | MR Egger                  | 4 | 0.7849 | 0.1838 | 3.3514 | 0.7747 | 0.0298 | 0.1046 | 0.8026 | 3.7651 | 0.1522 | 18.4575  |
| family. Victivallaceae. id. 2255   | LargeArteryStroke   | Weighted median           | 4 | 0.9207 | 0.6975 | 1.2153 | 0.5597 | 0.0298 | 0.1046 | 0.8026 | 3.7651 | 0.1522 | 18.4575  |
| family. Victivallaceae. id. 2255   | LargeArteryStroke   | Inverse variance weighted | 4 | 0.9645 | 0.7464 | 1.2464 | 0.7825 | 0.0298 | 0.1046 | 0.8026 | 3.7651 | 0.1522 | 18.4575  |
| family. Victivallaceae. id. 2255   | LargeArteryStroke   | Simple mode               | 4 | 0.8426 | 0.5443 | 1.3043 | 0.4982 | 0.0298 | 0.1046 | 0.8026 | 3.7651 | 0.1522 | 18.4575  |
| family. Victivallaceae. id. 2255   | LargeArteryStroke   | Weighted mode             | 4 | 0.8599 | 0.5867 | 1.2605 | 0.4956 | 0.0298 | 0.1046 | 0.8026 | 3.7651 | 0.1522 | 18.4575  |
| family. Victivallaceae. id. 2255   | SmallVesselStroke   | MR Egger                  | 4 | 0.5932 | 0.1091 | 3.2258 | 0.6070 | 0.0680 | 0.1222 | 0.6339 | 6.0372 | 0.0489 | 15.5275  |
| family. Victivallaceae. id. 2255   | SmallVesselStroke   | Weighted median           | 4 | 0.9531 | 0.7434 | 1.2220 | 0.7048 | 0.0680 | 0.1222 | 0.6339 | 6.0372 | 0.0489 | 15.5275  |
| family. Victivallaceae. id. 2255   | SmallVesselStroke   | Inverse variance weighted | 4 | 0.9493 | 0.6964 | 1.2940 | 0.7420 | 0.0680 | 0.1222 | 0.6339 | 6.0372 | 0.0489 | 15.5275  |
| family. Victivallaceae. id. 2255   | SmallVesselStroke   | Simple mode               | 4 | 1.2051 | 0.7041 | 2.0625 | 0.5450 | 0.0680 | 0.1222 | 0.6339 | 6.0372 | 0.0489 | 15.5275  |
| family. Victivallaceae. id. 2255   | SmallVesselStroke   | Weighted mode             | 4 | 1.1960 | 0.7386 | 1.9366 | 0.5194 | 0.0680 | 0.1222 | 0.6339 | 6.0372 | 0.0489 | 15.5275  |
| family. Victivallaceae. id. 2255   | Stroke              | MR Egger                  | 4 | 0.9561 | 0.7001 | 1.3058 | 0.8042 | 0.0072 | 0.0227 | 0.7827 | 1.9798 | 0.3716 | 174.1175 |
| family. Victivallaceae. id. 2255   | Stroke              | Weighted median           | 4 | 1.0192 | 0.9411 | 1.1037 | 0.6407 | 0.0072 | 0.0227 | 0.7827 | 1.9798 | 0.3716 | 174.1175 |
| family. Victivallaceae. id. 2255   | Stroke              | Inverse variance weighted | 4 | 1.0041 | 0.9420 | 1.0704 | 0.8995 | 0.0072 | 0.0227 | 0.7827 | 1.9798 | 0.3716 | 174.1175 |
| family. Victivallaceae. id. 2255   | Stroke              | Simple mode               | 4 | 1.0384 | 0.9262 | 1.1641 | 0.5644 | 0.0072 | 0.0227 | 0.7827 | 1.9798 | 0.3716 | 174.1175 |
| family. Victivallaceae. id. 2255   | Stroke              | Weighted mode             | 4 | 1.0396 | 0.9300 | 1.1622 | 0.5431 | 0.0072 | 0.0227 | 0.7827 | 1.9798 | 0.3716 | 174.1175 |

|                                                 |                     |                           |   |        |        |        |        |    |         |        |        |        |          |
|-------------------------------------------------|---------------------|---------------------------|---|--------|--------|--------|--------|----|---------|--------|--------|--------|----------|
| family. unknownfamily. id. 1000001214           | CardioEmbolicStroke | Inverse variance weighted | 2 | 0.8963 | 0.6992 | 1.1490 | 0.3877 | NA | NA      | NA     | 0.0589 | 0.8083 | 27.2532  |
| family. unknownfamily. id. 1000001214           | IschemicStroke      | Inverse variance weighted | 2 | 0.9840 | 0.8849 | 1.0943 | 0.7667 | NA | NA      | NA     | 0.1353 | 0.7130 | 207.9751 |
| family. unknownfamily. id. 1000001214           | LargeArteryStroke   | Inverse variance weighted | 2 | 0.9338 | 0.5166 | 1.6880 | 0.8207 | NA | NA      | NA     | 3.2586 | 0.0711 | 7.6561   |
| family. unknownfamily. id. 1000001214           | SmallVesselStroke   | Inverse variance weighted | 2 | 1.0304 | 0.6871 | 1.5452 | 0.8849 | NA | NA      | NA     | 1.7340 | 0.1879 | 13.7231  |
| family. unknownfamily. id. 1000001214           | Stroke              | Inverse variance weighted | 2 | 0.9881 | 0.8960 | 1.0898 | 0.8109 | NA | NA      | NA     | 0.0024 | 0.9605 | 320.2030 |
| family. unknownfamily. id. 1000006161           | CardioEmbolicStroke | MR Egger                  | 5 | 0.7764 | 0.3933 | 1.5325 | 0.5185 |    | 0.0372  | 0.0433 | 0.4534 | 1.3142 | 80.9389  |
| family. unknownfamily. id. 1000006161           | CardioEmbolicStroke | Weighted median           | 5 | 1.0179 | 0.8308 | 1.2472 | 0.8640 |    | 0.0372  | 0.0433 | 0.4534 | 1.3142 | 80.9389  |
| family. unknownfamily. id. 1000006161           | CardioEmbolicStroke | Inverse variance weighted | 5 | 1.0365 | 0.8771 | 1.2249 | 0.6738 |    | 0.0372  | 0.0433 | 0.4534 | 1.3142 | 80.9389  |
| family. unknownfamily. id. 1000006161           | CardioEmbolicStroke | Simple mode               | 5 | 0.9854 | 0.7529 | 1.2898 | 0.9200 |    | 0.0372  | 0.0433 | 0.4534 | 1.3142 | 80.9389  |
| family. unknownfamily. id. 1000006161           | CardioEmbolicStroke | Weighted mode             | 5 | 0.9867 | 0.7561 | 1.2877 | 0.9262 |    | 0.0372  | 0.0433 | 0.4534 | 1.3142 | 80.9389  |
| family. unknownfamily. id. 1000006161           | IschemicStroke      | MR Egger                  | 5 | 1.0032 | 0.7533 | 1.3360 | 0.9839 |    | 0.0032  | 0.0187 | 0.8741 | 1.2508 | 169.2646 |
| family. unknownfamily. id. 1000006161           | IschemicStroke      | Weighted median           | 5 | 1.0124 | 0.9283 | 1.1041 | 0.7810 |    | 0.0032  | 0.0187 | 0.8741 | 1.2508 | 169.2646 |
| family. unknownfamily. id. 1000006161           | IschemicStroke      | Inverse variance weighted | 5 | 1.0280 | 0.9574 | 1.1038 | 0.4472 |    | 0.0032  | 0.0187 | 0.8741 | 1.2508 | 169.2646 |
| family. unknownfamily. id. 1000006161           | IschemicStroke      | Simple mode               | 5 | 1.0034 | 0.8971 | 1.1223 | 0.9554 |    | 0.0032  | 0.0187 | 0.8741 | 1.2508 | 169.2646 |
| family. unknownfamily. id. 1000006161           | IschemicStroke      | Weighted mode             | 5 | 1.0045 | 0.8959 | 1.1264 | 0.9421 |    | 0.0032  | 0.0187 | 0.8741 | 1.2508 | 169.2646 |
| family. unknownfamily. id. 1000006161           | LargeArteryStroke   | MR Egger                  | 5 | 0.6240 | 0.2401 | 1.6215 | 0.4045 |    | 0.0661  | 0.0598 | 0.3499 | 1.5151 | 39.4107  |
| family. unknownfamily. id. 1000006161           | LargeArteryStroke   | Weighted median           | 5 | 1.0438 | 0.7829 | 1.3918 | 0.7701 |    | 0.0661  | 0.0598 | 0.3499 | 1.5151 | 39.4107  |
| family. unknownfamily. id. 1000006161           | LargeArteryStroke   | Inverse variance weighted | 5 | 1.0520 | 0.8352 | 1.3251 | 0.6667 |    | 0.0661  | 0.0598 | 0.3499 | 1.5151 | 39.4107  |
| family. unknownfamily. id. 1000006161           | LargeArteryStroke   | Simple mode               | 5 | 1.0245 | 0.6997 | 1.4999 | 0.9071 |    | 0.0661  | 0.0598 | 0.3499 | 1.5151 | 39.4107  |
| family. unknownfamily. id. 1000006161           | LargeArteryStroke   | Weighted mode             | 5 | 1.0245 | 0.7057 | 1.4871 | 0.9050 |    | 0.0661  | 0.0598 | 0.3499 | 1.5151 | 39.4107  |
| family. unknownfamily. id. 1000006161           | SmallVesselStroke   | MR Egger                  | 5 | 1.1650 | 0.4884 | 2.7790 | 0.7533 |    | 0.0170  | 0.0559 | 0.7804 | 2.7377 | 13.8224  |
| family. unknownfamily. id. 1000006161           | SmallVesselStroke   | Weighted median           | 5 | 1.2241 | 0.9267 | 1.6170 | 0.1544 |    | 0.0170  | 0.0559 | 0.7804 | 2.7377 | 13.8224  |
| family. unknownfamily. id. 1000006161           | SmallVesselStroke   | Inverse variance weighted | 5 | 1.3282 | 1.0734 | 1.6434 | 0.0090 |    | 0.0170  | 0.0559 | 0.7804 | 2.7377 | 13.8224  |
| family. unknownfamily. id. 1000006161           | SmallVesselStroke   | Simple mode               | 5 | 1.1550 | 0.7869 | 1.6951 | 0.5026 |    | 0.0170  | 0.0559 | 0.7804 | 2.7377 | 13.8224  |
| family. unknownfamily. id. 1000006161           | SmallVesselStroke   | Weighted mode             | 5 | 1.1550 | 0.7801 | 1.7100 | 0.5116 |    | 0.0170  | 0.0559 | 0.7804 | 2.7377 | 13.8224  |
| family. unknownfamily. id. 1000006161           | Stroke              | MR Egger                  | 5 | 1.0337 | 0.7950 | 1.3440 | 0.8205 |    | 0.0001  | 0.0171 | 0.9972 | 2.5476 | 107.5650 |
| family. unknownfamily. id. 1000006161           | Stroke              | Weighted median           | 5 | 1.0710 | 0.9823 | 1.1677 | 0.1199 |    | 0.0001  | 0.0171 | 0.9972 | 2.5476 | 107.5650 |
| family. unknownfamily. id. 1000006161           | Stroke              | Inverse variance weighted | 5 | 1.0342 | 0.9689 | 1.1040 | 0.3123 |    | 0.0001  | 0.0171 | 0.9972 | 2.5476 | 107.5650 |
| family. unknownfamily. id. 1000006161           | Stroke              | Simple mode               | 5 | 1.0788 | 0.9547 | 1.2190 | 0.2906 |    | 0.0001  | 0.0171 | 0.9972 | 2.5476 | 107.5650 |
| family. unknownfamily. id. 1000006161           | Stroke              | Weighted mode             | 5 | 1.0788 | 0.9615 | 1.2104 | 0.2660 |    | 0.0001  | 0.0171 | 0.9972 | 2.5476 | 107.5650 |
| genus. Eubacteriumbrachygroup. id. 11296        | CardioEmbolicStroke | MR Egger                  | 3 | 0.6465 | 0.3451 | 1.2111 | 0.4032 |    | 0.0474  | 0.0399 | 0.4455 | 1.4176 | 21.9278  |
| genus. Eubacteriumbrachygroup. id. 11296        | CardioEmbolicStroke | Weighted median           | 3 | 0.9944 | 0.7803 | 1.2671 | 0.9635 |    | 0.0474  | 0.0399 | 0.4455 | 1.4176 | 21.9278  |
| genus. Eubacteriumbrachygroup. id. 11296        | CardioEmbolicStroke | Inverse variance weighted | 3 | 0.9298 | 0.7726 | 1.1190 | 0.4412 |    | 0.0474  | 0.0399 | 0.4455 | 1.4176 | 21.9278  |
| genus. Eubacteriumbrachygroup. id. 11296        | CardioEmbolicStroke | Simple mode               | 3 | 1.0037 | 0.7563 | 1.3319 | 0.9822 |    | 0.0474  | 0.0399 | 0.4455 | 1.4176 | 21.9278  |
| genus. Eubacteriumbrachygroup. id. 11296        | CardioEmbolicStroke | Weighted mode             | 3 | 1.0029 | 0.7588 | 1.3255 | 0.9857 |    | 0.0474  | 0.0399 | 0.4455 | 1.4176 | 21.9278  |
| genus. Eubacteriumbrachygroup. id. 11296        | IschemicStroke      | MR Egger                  | 3 | 0.8062 | 0.6144 | 1.0580 | 0.3641 |    | 0.0246  | 0.0174 | 0.3910 | 2.3303 | 58.7221  |
| genus. Eubacteriumbrachygroup. id. 11296        | IschemicStroke      | Weighted median           | 3 | 0.9758 | 0.8760 | 1.0870 | 0.6560 |    | 0.0246  | 0.0174 | 0.3910 | 2.3303 | 58.7221  |
| genus. Eubacteriumbrachygroup. id. 11296        | IschemicStroke      | Inverse variance weighted | 3 | 0.9726 | 0.8906 | 1.0620 | 0.5355 |    | 0.0246  | 0.0174 | 0.3910 | 2.3303 | 58.7221  |
| genus. Eubacteriumbrachygroup. id. 11296        | IschemicStroke      | Simple mode               | 3 | 0.9724 | 0.8454 | 1.1185 | 0.7328 |    | 0.0246  | 0.0174 | 0.3910 | 2.3303 | 58.7221  |
| genus. Eubacteriumbrachygroup. id. 11296        | IschemicStroke      | Weighted mode             | 3 | 0.9799 | 0.8616 | 1.1146 | 0.7868 |    | 0.0246  | 0.0174 | 0.3910 | 2.3303 | 58.7221  |
| genus. Eubacteriumbrachygroup. id. 11296        | LargeArteryStroke   | Inverse variance weighted | 2 | 0.7689 | 0.5702 | 1.0368 | 0.0849 | NA | NA      | NA     | 0.7772 | 0.3780 | 8.6270   |
| genus. Eubacteriumbrachygroup. id. 11296        | SmallVesselStroke   | MR Egger                  | 3 | 0.6384 | 0.2458 | 1.6578 | 0.5259 |    | 0.0513  | 0.0599 | 0.5494 | 1.2380 | 22.8612  |
| genus. Eubacteriumbrachygroup. id. 11296        | SmallVesselStroke   | Weighted median           | 3 | 0.8708 | 0.6352 | 1.1937 | 0.3899 |    | 0.0513  | 0.0599 | 0.5494 | 1.2380 | 22.8612  |
| genus. Eubacteriumbrachygroup. id. 11296        | SmallVesselStroke   | Inverse variance weighted | 3 | 0.9521 | 0.7408 | 1.2236 | 0.7013 |    | 0.0513  | 0.0599 | 0.5494 | 1.2380 | 22.8612  |
| genus. Eubacteriumbrachygroup. id. 11296        | SmallVesselStroke   | Simple mode               | 3 | 0.8378 | 0.5748 | 1.2214 | 0.4547 |    | 0.0513  | 0.0599 | 0.5494 | 1.2380 | 22.8612  |
| genus. Eubacteriumbrachygroup. id. 11296        | SmallVesselStroke   | Weighted mode             | 3 | 0.8412 | 0.5760 | 1.2285 | 0.4653 |    | 0.0513  | 0.0599 | 0.5494 | 1.2380 | 22.8612  |
| genus. Eubacteriumbrachygroup. id. 11296        | Stroke              | MR Egger                  | 3 | 0.8939 | 0.6944 | 1.1506 | 0.5439 |    | 0.0090  | 0.0161 | 0.6758 | 0.5759 | 89.4834  |
| genus. Eubacteriumbrachygroup. id. 11296        | Stroke              | Weighted median           | 3 | 0.9375 | 0.8528 | 1.0305 | 0.1812 |    | 0.0090  | 0.0161 | 0.6758 | 0.5759 | 89.4834  |
| genus. Eubacteriumbrachygroup. id. 11296        | Stroke              | Inverse variance weighted | 3 | 0.9574 | 0.8875 | 1.0327 | 0.2595 |    | 0.0090  | 0.0161 | 0.6758 | 0.5759 | 89.4834  |
| genus. Eubacteriumbrachygroup. id. 11296        | Stroke              | Simple mode               | 3 | 0.9326 | 0.8309 | 1.0468 | 0.3580 |    | 0.0090  | 0.0161 | 0.6758 | 0.5759 | 89.4834  |
| genus. Eubacteriumbrachygroup. id. 11296        | Stroke              | Weighted mode             | 3 | 0.9326 | 0.8333 | 1.0437 | 0.3482 |    | 0.0090  | 0.0161 | 0.6758 | 0.5759 | 89.4834  |
| genus. Eubacteriumcoprostanoligenesgroup. id. 1 | CardioEmbolicStroke | MR Egger                  | 4 | 1.0362 | 0.2279 | 4.7105 | 0.9675 |    | -0.0112 | 0.0510 | 0.8460 | 1.0549 | 11.6054  |
| genus. Eubacteriumcoprostanoligenesgroup. id. 1 | CardioEmbolicStroke | Weighted median           | 4 | 0.8287 | 0.5538 | 1.2399 | 0.3607 |    | -0.0112 | 0.0510 | 0.8460 | 1.0549 | 11.6054  |
| genus. Eubacteriumcoprostanoligenesgroup. id. 1 | CardioEmbolicStroke | Inverse variance weighted | 4 | 0.8775 | 0.6311 | 1.2201 | 0.4370 |    | -0.0112 | 0.0510 | 0.8460 | 1.0549 | 11.6054  |

|                                               |                     |                           |   |        |        |        |        |         |        |        |        |        |          |
|-----------------------------------------------|---------------------|---------------------------|---|--------|--------|--------|--------|---------|--------|--------|--------|--------|----------|
| genus..Eubacteriumcoprostanoligenesgroup.id.1 | CardioEmbolicStroke | Simple mode               | 4 | 0.8067 | 0.4803 | 1.3551 | 0.4764 | -0.0112 | 0.0510 | 0.8460 | 1.0549 | 0.5901 | 11.6054  |
| genus..Eubacteriumcoprostanoligenesgroup.id.1 | CardioEmbolicStroke | Weighted mode             | 4 | 0.8082 | 0.4613 | 1.4159 | 0.5106 | -0.0112 | 0.0510 | 0.8460 | 1.0549 | 0.5901 | 11.6054  |
| genus..Eubacteriumcoprostanoligenesgroup.id.1 | IschemicStroke      | MR Egger                  | 4 | 1.0400 | 0.4240 | 2.5508 | 0.9395 | -0.0072 | 0.0301 | 0.8328 | 3.7382 | 0.1543 | 17.1480  |
| genus..Eubacteriumcoprostanoligenesgroup.id.1 | IschemicStroke      | Weighted median           | 4 | 0.9237 | 0.7694 | 1.1090 | 0.3950 | -0.0072 | 0.0301 | 0.8328 | 3.7382 | 0.1543 | 17.1480  |
| genus..Eubacteriumcoprostanoligenesgroup.id.1 | IschemicStroke      | Inverse variance weighted | 4 | 0.9344 | 0.7937 | 1.0999 | 0.4146 | -0.0072 | 0.0301 | 0.8328 | 3.7382 | 0.1543 | 17.1480  |
| genus..Eubacteriumcoprostanoligenesgroup.id.1 | IschemicStroke      | Simple mode               | 4 | 0.8968 | 0.6754 | 1.1909 | 0.5065 | -0.0072 | 0.0301 | 0.8328 | 3.7382 | 0.1543 | 17.1480  |
| genus..Eubacteriumcoprostanoligenesgroup.id.1 | IschemicStroke      | Weighted mode             | 4 | 0.9039 | 0.6713 | 1.2172 | 0.5534 | -0.0072 | 0.0301 | 0.8328 | 3.7382 | 0.1543 | 17.1480  |
| genus..Eubacteriumcoprostanoligenesgroup.id.1 | LargeArteryStroke   | MR Egger                  | 4 | 0.5447 | 0.0712 | 4.1673 | 0.6177 | 0.0430  | 0.0686 | 0.5946 | 0.5115 | 0.7743 | 13.4973  |
| genus..Eubacteriumcoprostanoligenesgroup.id.1 | LargeArteryStroke   | Weighted median           | 4 | 1.0012 | 0.6066 | 1.6525 | 0.9963 | 0.0430  | 0.0686 | 0.5946 | 0.5115 | 0.7743 | 13.4973  |
| genus..Eubacteriumcoprostanoligenesgroup.id.1 | LargeArteryStroke   | Inverse variance weighted | 4 | 1.0285 | 0.6612 | 1.6000 | 0.9007 | 0.0430  | 0.0686 | 0.5946 | 0.5115 | 0.7743 | 13.4973  |
| genus..Eubacteriumcoprostanoligenesgroup.id.1 | LargeArteryStroke   | Simple mode               | 4 | 0.8810 | 0.4533 | 1.7121 | 0.7335 | 0.0430  | 0.0686 | 0.5946 | 0.5115 | 0.7743 | 13.4973  |
| genus..Eubacteriumcoprostanoligenesgroup.id.1 | LargeArteryStroke   | Weighted mode             | 4 | 0.8705 | 0.4433 | 1.7096 | 0.7141 | 0.0430  | 0.0686 | 0.5946 | 0.5115 | 0.7743 | 13.4973  |
| genus..Eubacteriumcoprostanoligenesgroup.id.1 | SmallVesselStroke   | MR Egger                  | 4 | 1.1430 | 0.1727 | 7.5630 | 0.9024 | -0.0132 | 0.0638 | 0.8550 | 0.6282 | 0.7305 | 14.8744  |
| genus..Eubacteriumcoprostanoligenesgroup.id.1 | SmallVesselStroke   | Weighted median           | 4 | 0.9351 | 0.5828 | 1.5003 | 0.7807 | -0.0132 | 0.0638 | 0.8550 | 0.6282 | 0.7305 | 14.8744  |
| genus..Eubacteriumcoprostanoligenesgroup.id.1 | SmallVesselStroke   | Inverse variance weighted | 4 | 0.9405 | 0.6241 | 1.4172 | 0.7693 | -0.0132 | 0.0638 | 0.8550 | 0.6282 | 0.7305 | 14.8744  |
| genus..Eubacteriumcoprostanoligenesgroup.id.1 | SmallVesselStroke   | Simple mode               | 4 | 0.8892 | 0.4797 | 1.6486 | 0.7341 | -0.0132 | 0.0638 | 0.8550 | 0.6282 | 0.7305 | 14.8744  |
| genus..Eubacteriumcoprostanoligenesgroup.id.1 | SmallVesselStroke   | Weighted mode             | 4 | 0.9045 | 0.4743 | 1.7248 | 0.7804 | -0.0132 | 0.0638 | 0.8550 | 0.6282 | 0.7305 | 14.8744  |
| genus..Eubacteriumcoprostanoligenesgroup.id.1 | Stroke              | MR Egger                  | 4 | 0.8606 | 0.2379 | 3.1128 | 0.8402 | 0.0084  | 0.0434 | 0.8649 | 8.8225 | 0.0121 | 12.0387  |
| genus..Eubacteriumcoprostanoligenesgroup.id.1 | Stroke              | Weighted median           | 4 | 0.9894 | 0.8260 | 1.1852 | 0.9080 | 0.0084  | 0.0434 | 0.8649 | 8.8225 | 0.0121 | 12.0387  |
| genus..Eubacteriumcoprostanoligenesgroup.id.1 | Stroke              | Inverse variance weighted | 4 | 0.9736 | 0.7735 | 1.2255 | 0.8200 | 0.0084  | 0.0434 | 0.8649 | 8.8225 | 0.0121 | 12.0387  |
| genus..Eubacteriumcoprostanoligenesgroup.id.1 | Stroke              | Simple mode               | 4 | 1.0098 | 0.7595 | 1.3427 | 0.9505 | 0.0084  | 0.0434 | 0.8649 | 8.8225 | 0.0121 | 12.0387  |
| genus..Eubacteriumcoprostanoligenesgroup.id.1 | Stroke              | Weighted mode             | 4 | 1.0098 | 0.7714 | 1.3221 | 0.9477 | 0.0084  | 0.0434 | 0.8649 | 8.8225 | 0.0121 | 12.0387  |
| genus..Eubacteriumhalliigroup.id.11338        | CardioEmbolicStroke | MR Egger                  | 4 | 0.7277 | 0.3823 | 1.3850 | 0.4351 | 0.0326  | 0.0354 | 0.4542 | 3.2585 | 0.1961 | 12.9400  |
| genus..Eubacteriumhalliigroup.id.11338        | CardioEmbolicStroke | Weighted median           | 4 | 0.8676 | 0.6310 | 1.1929 | 0.3820 | 0.0326  | 0.0354 | 0.4542 | 3.2585 | 0.1961 | 12.9400  |
| genus..Eubacteriumhalliigroup.id.11338        | CardioEmbolicStroke | Inverse variance weighted | 4 | 0.9451 | 0.6892 | 1.2959 | 0.7257 | 0.0326  | 0.0354 | 0.4542 | 3.2585 | 0.1961 | 12.9400  |
| genus..Eubacteriumhalliigroup.id.11338        | CardioEmbolicStroke | Simple mode               | 4 | 1.2626 | 0.7182 | 2.2198 | 0.4772 | 0.0326  | 0.0354 | 0.4542 | 3.2585 | 0.1961 | 12.9400  |
| genus..Eubacteriumhalliigroup.id.11338        | CardioEmbolicStroke | Weighted mode             | 4 | 0.7647 | 0.4589 | 1.2744 | 0.3790 | 0.0326  | 0.0354 | 0.4542 | 3.2585 | 0.1961 | 12.9400  |
| genus..Eubacteriumhalliigroup.id.11338        | IschemicStroke      | MR Egger                  | 4 | 0.9587 | 0.7313 | 1.2568 | 0.7890 | -0.0009 | 0.0148 | 0.9586 | 3.0577 | 0.2168 | 46.6833  |
| genus..Eubacteriumhalliigroup.id.11338        | IschemicStroke      | Weighted median           | 4 | 0.9148 | 0.7975 | 1.0492 | 0.2029 | -0.0009 | 0.0148 | 0.9586 | 3.0577 | 0.2168 | 46.6833  |
| genus..Eubacteriumhalliigroup.id.11338        | IschemicStroke      | Inverse variance weighted | 4 | 0.9520 | 0.8524 | 1.0632 | 0.3830 | -0.0009 | 0.0148 | 0.9586 | 3.0577 | 0.2168 | 46.6833  |
| genus..Eubacteriumhalliigroup.id.11338        | IschemicStroke      | Simple mode               | 4 | 0.8944 | 0.7233 | 1.1058 | 0.3783 | -0.0009 | 0.0148 | 0.9586 | 3.0577 | 0.2168 | 46.6833  |
| genus..Eubacteriumhalliigroup.id.11338        | IschemicStroke      | Weighted mode             | 4 | 0.8903 | 0.7314 | 1.0837 | 0.3303 | -0.0009 | 0.0148 | 0.9586 | 3.0577 | 0.2168 | 46.6833  |
| genus..Eubacteriumhalliigroup.id.11338        | LargeArteryStroke   | MR Egger                  | 3 | 0.7049 | 0.2713 | 1.8310 | 0.6035 | 0.0190  | 0.0428 | 0.7340 | 0.1883 | 0.6643 | 14.1485  |
| genus..Eubacteriumhalliigroup.id.11338        | LargeArteryStroke   | Weighted median           | 3 | 0.8539 | 0.5028 | 1.4504 | 0.5591 | 0.0190  | 0.0428 | 0.7340 | 0.1883 | 0.6643 | 14.1485  |
| genus..Eubacteriumhalliigroup.id.11338        | LargeArteryStroke   | Inverse variance weighted | 3 | 0.8532 | 0.5451 | 1.3354 | 0.4872 | 0.0190  | 0.0428 | 0.7340 | 0.1883 | 0.6643 | 14.1485  |
| genus..Eubacteriumhalliigroup.id.11338        | LargeArteryStroke   | Simple mode               | 3 | 0.8938 | 0.4788 | 1.6687 | 0.7582 | 0.0190  | 0.0428 | 0.7340 | 0.1883 | 0.6643 | 14.1485  |
| genus..Eubacteriumhalliigroup.id.11338        | LargeArteryStroke   | Weighted mode             | 3 | 0.8569 | 0.4748 | 1.5464 | 0.6591 | 0.0190  | 0.0428 | 0.7340 | 0.1883 | 0.6643 | 14.1485  |
| genus..Eubacteriumhalliigroup.id.11338        | SmallVesselStroke   | MR Egger                  | 3 | 1.0462 | 0.4446 | 2.4617 | 0.9344 | -0.0258 | 0.0391 | 0.6289 | 0.2537 | 0.6145 | 16.3993  |
| genus..Eubacteriumhalliigroup.id.11338        | SmallVesselStroke   | Weighted median           | 3 | 0.8327 | 0.5142 | 1.3484 | 0.4565 | -0.0258 | 0.0391 | 0.6289 | 0.2537 | 0.6145 | 16.3993  |
| genus..Eubacteriumhalliigroup.id.11338        | SmallVesselStroke   | Inverse variance weighted | 3 | 0.8111 | 0.5439 | 1.2095 | 0.3044 | -0.0258 | 0.0391 | 0.6289 | 0.2537 | 0.6145 | 16.3993  |
| genus..Eubacteriumhalliigroup.id.11338        | SmallVesselStroke   | Simple mode               | 3 | 0.8433 | 0.4832 | 1.4716 | 0.6094 | -0.0258 | 0.0391 | 0.6289 | 0.2537 | 0.6145 | 16.3993  |
| genus..Eubacteriumhalliigroup.id.11338        | SmallVesselStroke   | Weighted mode             | 3 | 0.8530 | 0.4846 | 1.5014 | 0.6368 | -0.0258 | 0.0391 | 0.6289 | 0.2537 | 0.6145 | 16.3993  |
| genus..Eubacteriumhalliigroup.id.11338        | Stroke              | MR Egger                  | 4 | 1.0013 | 0.7669 | 1.3075 | 0.9931 | -0.0058 | 0.0146 | 0.7280 | 3.4661 | 0.1767 | 48.2342  |
| genus..Eubacteriumhalliigroup.id.11338        | Stroke              | Weighted median           | 4 | 0.9071 | 0.7949 | 1.0351 | 0.1477 | -0.0058 | 0.0146 | 0.7280 | 3.4661 | 0.1767 | 48.2342  |
| genus..Eubacteriumhalliigroup.id.11338        | Stroke              | Inverse variance weighted | 4 | 0.9552 | 0.8532 | 1.0695 | 0.4267 | -0.0058 | 0.0146 | 0.7280 | 3.4661 | 0.1767 | 48.2342  |
| genus..Eubacteriumhalliigroup.id.11338        | Stroke              | Simple mode               | 4 | 0.8894 | 0.7290 | 1.0850 | 0.3315 | -0.0058 | 0.0146 | 0.7280 | 3.4661 | 0.1767 | 48.2342  |
| genus..Eubacteriumhalliigroup.id.11338        | Stroke              | Weighted mode             | 4 | 0.8925 | 0.7372 | 1.0805 | 0.3277 | -0.0058 | 0.0146 | 0.7280 | 3.4661 | 0.1767 | 48.2342  |
| genus..Eubacteriummodatumgroup.id.11297       | CardioEmbolicStroke | MR Egger                  | 3 | 0.0200 | 0.0004 | 1.0437 | 0.3032 | 0.6193  | 0.3271 | 0.3094 | 3.9813 | 0.1366 | 23.2555  |
| genus..Eubacteriummodatumgroup.id.11297       | CardioEmbolicStroke | Weighted median           | 3 | 0.9213 | 0.7354 | 1.1541 | 0.4756 | 0.6193  | 0.3271 | 0.3094 | 3.9813 | 0.1366 | 23.2555  |
| genus..Eubacteriummodatumgroup.id.11297       | CardioEmbolicStroke | Inverse variance weighted | 3 | 0.9090 | 0.7254 | 1.1391 | 0.4073 | 0.6193  | 0.3271 | 0.3094 | 3.9813 | 0.1366 | 23.2555  |
| genus..Eubacteriummodatumgroup.id.11297       | CardioEmbolicStroke | Simple mode               | 3 | 0.9281 | 0.6706 | 1.2844 | 0.6966 | 0.6193  | 0.3271 | 0.3094 | 3.9813 | 0.1366 | 23.2555  |
| genus..Eubacteriummodatumgroup.id.11297       | CardioEmbolicStroke | Weighted mode             | 3 | 0.9327 | 0.6857 | 1.2687 | 0.7005 | 0.6193  | 0.3271 | 0.3094 | 3.9813 | 0.1366 | 23.2555  |
| genus..Eubacteriummodatumgroup.id.11297       | IschemicStroke      | MR Egger                  | 3 | 0.4395 | 0.0817 | 2.3649 | 0.5138 | 0.1277  | 0.1392 | 0.5274 | 1.0691 | 0.5859 | 117.3710 |
| genus..Eubacteriummodatumgroup.id.11297       | IschemicStroke      | Weighted median           | 3 | 0.9533 | 0.8753 | 1.0382 | 0.2716 | 0.1277  | 0.1392 | 0.5274 | 1.0691 | 0.5859 | 117.3710 |

|                                               |                     |                           |   |        |        |         |        |         |        |        |        |        |          |
|-----------------------------------------------|---------------------|---------------------------|---|--------|--------|---------|--------|---------|--------|--------|--------|--------|----------|
| genus..Eubacteriumnodatumgroup.id.11297       | IschemicStroke      | Inverse variance weighted | 3 | 0.9656 | 0.9023 | 1.0334  | 0.3122 | 0.1277  | 0.1392 | 0.5274 | 1.0691 | 0.5859 | 117.3710 |
| genus..Eubacteriumnodatumgroup.id.11297       | IschemicStroke      | Simple mode               | 3 | 0.9440 | 0.8509 | 1.0472  | 0.3899 | 0.1277  | 0.1392 | 0.5274 | 1.0691 | 0.5859 | 117.3710 |
| genus..Eubacteriumnodatumgroup.id.11297       | IschemicStroke      | Weighted mode             | 3 | 0.9435 | 0.8520 | 1.0449  | 0.3803 | 0.1277  | 0.1392 | 0.5274 | 1.0691 | 0.5859 | 117.3710 |
| genus..Eubacteriumnodatumgroup.id.11297       | LargeArteryStroke   | MR Egger                  | 3 | 0.0004 | 0.0000 | 0.0700  | 0.2080 | 1.2762  | 0.4349 | 0.2091 | 9.4521 | 0.0089 | 9.8985   |
| genus..Eubacteriumnodatumgroup.id.11297       | LargeArteryStroke   | Weighted median           | 3 | 0.9607 | 0.6752 | 1.3669  | 0.8235 | 1.2762  | 0.4349 | 0.2091 | 9.4521 | 0.0089 | 9.8985   |
| genus..Eubacteriumnodatumgroup.id.11297       | LargeArteryStroke   | Inverse variance weighted | 3 | 0.9516 | 0.5961 | 1.5192  | 0.8355 | 1.2762  | 0.4349 | 0.2091 | 9.4521 | 0.0089 | 9.8985   |
| genus..Eubacteriumnodatumgroup.id.11297       | LargeArteryStroke   | Simple mode               | 3 | 0.9549 | 0.5599 | 1.6286  | 0.8810 | 1.2762  | 0.4349 | 0.2091 | 9.4521 | 0.0089 | 9.8985   |
| genus..Eubacteriumnodatumgroup.id.11297       | LargeArteryStroke   | Weighted mode             | 3 | 0.9647 | 0.5834 | 1.5952  | 0.9015 | 1.2762  | 0.4349 | 0.2091 | 9.4521 | 0.0089 | 9.8985   |
| genus..Eubacteriumnodatumgroup.id.11297       | SmallVesselStroke   | MR Egger                  | 3 | 0.1802 | 0.0012 | 27.3279 | 0.6247 | 0.2723  | 0.4146 | 0.6301 | 0.4646 | 0.7927 | 70.1573  |
| genus..Eubacteriumnodatumgroup.id.11297       | SmallVesselStroke   | Weighted median           | 3 | 0.9246 | 0.7235 | 1.1817  | 0.5314 | 0.2723  | 0.4146 | 0.6301 | 0.4646 | 0.7927 | 70.1573  |
| genus..Eubacteriumnodatumgroup.id.11297       | SmallVesselStroke   | Inverse variance weighted | 3 | 0.9681 | 0.7884 | 1.1887  | 0.7568 | 0.2723  | 0.4146 | 0.6301 | 0.4646 | 0.7927 | 70.1573  |
| genus..Eubacteriumnodatumgroup.id.11297       | SmallVesselStroke   | Simple mode               | 3 | 0.9201 | 0.7047 | 1.2013  | 0.6028 | 0.2723  | 0.4146 | 0.6301 | 0.4646 | 0.7927 | 70.1573  |
| genus..Eubacteriumnodatumgroup.id.11297       | SmallVesselStroke   | Weighted mode             | 3 | 0.9197 | 0.6867 | 1.2319  | 0.6311 | 0.2723  | 0.4146 | 0.6301 | 0.4646 | 0.7927 | 70.1573  |
| genus..Eubacteriumnodatumgroup.id.11297       | Stroke              | MR Egger                  | 3 | 0.4721 | 0.0946 | 2.3572  | 0.5283 | 0.1168  | 0.1333 | 0.5419 | 0.9638 | 0.6176 | 130.6828 |
| genus..Eubacteriumnodatumgroup.id.11297       | Stroke              | Weighted median           | 3 | 0.9564 | 0.8844 | 1.0341  | 0.2633 | 0.1168  | 0.1333 | 0.5419 | 0.9638 | 0.6176 | 130.6828 |
| genus..Eubacteriumnodatumgroup.id.11297       | Stroke              | Inverse variance weighted | 3 | 0.9682 | 0.9079 | 1.0326  | 0.3255 | 0.1168  | 0.1333 | 0.5419 | 0.9638 | 0.6176 | 130.6828 |
| genus..Eubacteriumnodatumgroup.id.11297       | Stroke              | Simple mode               | 3 | 0.9486 | 0.8625 | 1.0433  | 0.3907 | 0.1168  | 0.1333 | 0.5419 | 0.9638 | 0.6176 | 130.6828 |
| genus..Eubacteriumnodatumgroup.id.11297       | Stroke              | Weighted mode             | 3 | 0.9490 | 0.8677 | 1.0379  | 0.3702 | 0.1168  | 0.1333 | 0.5419 | 0.9638 | 0.6176 | 130.6828 |
| genus..Eubacteriumoxidoreducensgroup.id.11339 | CardioEmbolicStroke | Inverse variance weighted | 2 | 1.0096 | 0.7907 | 1.2890  | 0.9392 | NA      | NA     | NA     | 1.0335 | 0.3093 | 34.7773  |
| genus..Eubacteriumoxidoreducensgroup.id.11339 | IschemicStroke      | Inverse variance weighted | 2 | 1.0429 | 0.9364 | 1.1614  | 0.4446 | NA      | NA     | NA     | 0.1957 | 0.6583 | 86.0907  |
| genus..Eubacteriumoxidoreducensgroup.id.11339 | LargeArteryStroke   | Inverse variance weighted | 2 | 0.9883 | 0.7151 | 1.3660  | 0.9433 | NA      | NA     | NA     | 0.9408 | 0.3321 | 27.9407  |
| genus..Eubacteriumoxidoreducensgroup.id.11339 | SmallVesselStroke   | Inverse variance weighted | 2 | 1.0153 | 0.7465 | 1.3810  | 0.9229 | NA      | NA     | NA     | 0.1306 | 0.7178 | 75.3892  |
| genus..Eubacteriumoxidoreducensgroup.id.11339 | Stroke              | Inverse variance weighted | 2 | 1.0105 | 0.9144 | 1.1166  | 0.8378 | NA      | NA     | NA     | 0.2003 | 0.6545 | 185.7305 |
| genus..Eubacteriumrectalegroup.id.14374       | CardioEmbolicStroke | MR Egger                  | 3 | 0.6779 | 0.2695 | 1.7051  | 0.5604 | 0.0552  | 0.0349 | 0.3587 | 2.8273 | 0.2432 | 9.4181   |
| genus..Eubacteriumrectalegroup.id.14374       | CardioEmbolicStroke | Weighted median           | 3 | 1.3073 | 0.8147 | 2.0980  | 0.2668 | 0.0552  | 0.0349 | 0.3587 | 2.8273 | 0.2432 | 9.4181   |
| genus..Eubacteriumrectalegroup.id.14374       | CardioEmbolicStroke | Inverse variance weighted | 3 | 1.3464 | 0.8789 | 2.0625  | 0.1716 | 0.0552  | 0.0349 | 0.3587 | 2.8273 | 0.2432 | 9.4181   |
| genus..Eubacteriumrectalegroup.id.14374       | CardioEmbolicStroke | Simple mode               | 3 | 1.4459 | 0.7616 | 2.7448  | 0.3767 | 0.0552  | 0.0349 | 0.3587 | 2.8273 | 0.2432 | 9.4181   |
| genus..Eubacteriumrectalegroup.id.14374       | CardioEmbolicStroke | Weighted mode             | 3 | 1.2246 | 0.6509 | 2.3040  | 0.5940 | 0.0552  | 0.0349 | 0.3587 | 2.8273 | 0.2432 | 9.4181   |
| genus..Eubacteriumrectalegroup.id.14374       | IschemicStroke      | MR Egger                  | 3 | 0.7322 | 0.4908 | 1.0923  | 0.3690 | 0.0326  | 0.0151 | 0.2763 | 4.6566 | 0.0975 | 30.9354  |
| genus..Eubacteriumrectalegroup.id.14374       | IschemicStroke      | Weighted median           | 3 | 1.0116 | 0.8176 | 1.2517  | 0.9152 | 0.0326  | 0.0151 | 0.2763 | 4.6566 | 0.0975 | 30.9354  |
| genus..Eubacteriumrectalegroup.id.14374       | IschemicStroke      | Inverse variance weighted | 3 | 1.0994 | 0.8694 | 1.3902  | 0.4288 | 0.0326  | 0.0151 | 0.2763 | 4.6566 | 0.0975 | 30.9354  |
| genus..Eubacteriumrectalegroup.id.14374       | IschemicStroke      | Simple mode               | 3 | 0.9822 | 0.7564 | 1.2755  | 0.9054 | 0.0326  | 0.0151 | 0.2763 | 4.6566 | 0.0975 | 30.9354  |
| genus..Eubacteriumrectalegroup.id.14374       | IschemicStroke      | Weighted mode             | 3 | 0.9822 | 0.7734 | 1.2474  | 0.8967 | 0.0326  | 0.0151 | 0.2763 | 4.6566 | 0.0975 | 30.9354  |
| genus..Eubacteriumrectalegroup.id.14374       | LargeArteryStroke   | MR Egger                  | 3 | 0.6156 | 0.1795 | 2.1113  | 0.5816 | 0.0515  | 0.0464 | 0.4666 | 1.6176 | 0.4454 | 9.6104   |
| genus..Eubacteriumrectalegroup.id.14374       | LargeArteryStroke   | Weighted median           | 3 | 1.2505 | 0.6809 | 2.2967  | 0.4710 | 0.0515  | 0.0464 | 0.4666 | 1.6176 | 0.4454 | 9.6104   |
| genus..Eubacteriumrectalegroup.id.14374       | LargeArteryStroke   | Inverse variance weighted | 3 | 1.1708 | 0.7229 | 1.8961  | 0.5215 | 0.0515  | 0.0464 | 0.4666 | 1.6176 | 0.4454 | 9.6104   |
| genus..Eubacteriumrectalegroup.id.14374       | LargeArteryStroke   | Simple mode               | 3 | 1.4390 | 0.6605 | 3.1355  | 0.4564 | 0.0515  | 0.0464 | 0.4666 | 1.6176 | 0.4454 | 9.6104   |
| genus..Eubacteriumrectalegroup.id.14374       | LargeArteryStroke   | Weighted mode             | 3 | 1.4390 | 0.6436 | 3.2174  | 0.4688 | 0.0515  | 0.0464 | 0.4666 | 1.6176 | 0.4454 | 9.6104   |
| genus..Eubacteriumrectalegroup.id.14374       | SmallVesselStroke   | MR Egger                  | 3 | 0.5294 | 0.0478 | 5.8608  | 0.6955 | 0.0638  | 0.0908 | 0.6104 | 4.4387 | 0.0351 | 3.8941   |
| genus..Eubacteriumrectalegroup.id.14374       | SmallVesselStroke   | Weighted median           | 3 | 1.3488 | 0.6990 | 2.6030  | 0.3723 | 0.0638  | 0.0908 | 0.6104 | 4.4387 | 0.0351 | 3.8941   |
| genus..Eubacteriumrectalegroup.id.14374       | SmallVesselStroke   | Inverse variance weighted | 3 | 1.1704 | 0.5224 | 2.6222  | 0.7022 | 0.0638  | 0.0908 | 0.6104 | 4.4387 | 0.0351 | 3.8941   |
| genus..Eubacteriumrectalegroup.id.14374       | SmallVesselStroke   | Simple mode               | 3 | 1.6249 | 0.7438 | 3.5499  | 0.3476 | 0.0638  | 0.0908 | 0.6104 | 4.4387 | 0.0351 | 3.8941   |
| genus..Eubacteriumrectalegroup.id.14374       | SmallVesselStroke   | Weighted mode             | 3 | 1.5697 | 0.6688 | 3.6837  | 0.4091 | 0.0638  | 0.0908 | 0.6104 | 4.4387 | 0.0351 | 3.8941   |
| genus..Eubacteriumrectalegroup.id.14374       | Stroke              | MR Egger                  | 3 | 0.7731 | 0.5342 | 1.1188  | 0.4026 | 0.0269  | 0.0140 | 0.3050 | 3.7633 | 0.1523 | 40.4238  |
| genus..Eubacteriumrectalegroup.id.14374       | Stroke              | Weighted median           | 3 | 0.9939 | 0.8196 | 1.2053  | 0.9506 | 0.0269  | 0.0140 | 0.3050 | 3.7633 | 0.1523 | 40.4238  |
| genus..Eubacteriumrectalegroup.id.14374       | Stroke              | Inverse variance weighted | 3 | 1.0808 | 0.8890 | 1.3140  | 0.4357 | 0.0269  | 0.0140 | 0.3050 | 3.7633 | 0.1523 | 40.4238  |
| genus..Eubacteriumrectalegroup.id.14374       | Stroke              | Simple mode               | 3 | 0.9835 | 0.7671 | 1.2610  | 0.9078 | 0.0269  | 0.0140 | 0.3050 | 3.7633 | 0.1523 | 40.4238  |
| genus..Eubacteriumrectalegroup.id.14374       | Stroke              | Weighted mode             | 3 | 0.9835 | 0.7842 | 1.2336  | 0.8989 | 0.0269  | 0.0140 | 0.3050 | 3.7633 | 0.1523 | 40.4238  |
| genus..Eubacteriumruminantiumgroup.id.11340   | CardioEmbolicStroke | MR Egger                  | 4 | 0.9523 | 0.5186 | 1.7488  | 0.8892 | 0.0015  | 0.0345 | 0.9700 | 0.1242 | 0.9398 | 107.4572 |
| genus..Eubacteriumruminantiumgroup.id.11340   | CardioEmbolicStroke | Weighted median           | 4 | 0.9703 | 0.7704 | 1.2220  | 0.7977 | 0.0015  | 0.0345 | 0.9700 | 0.1242 | 0.9398 | 107.4572 |
| genus..Eubacteriumruminantiumgroup.id.11340   | CardioEmbolicStroke | Inverse variance weighted | 4 | 0.9642 | 0.7875 | 1.1805  | 0.7239 | 0.0015  | 0.0345 | 0.9700 | 0.1242 | 0.9398 | 107.4572 |
| genus..Eubacteriumruminantiumgroup.id.11340   | CardioEmbolicStroke | Simple mode               | 4 | 0.9873 | 0.7393 | 1.3185  | 0.9364 | 0.0015  | 0.0345 | 0.9700 | 0.1242 | 0.9398 | 107.4572 |
| genus..Eubacteriumruminantiumgroup.id.11340   | CardioEmbolicStroke | Weighted mode             | 4 | 0.9889 | 0.7497 | 1.3043  | 0.9419 | 0.0015  | 0.0345 | 0.9700 | 0.1242 | 0.9398 | 107.4572 |
| genus..Eubacteriumruminantiumgroup.id.11340   | IschemicStroke      | MR Egger                  | 4 | 1.1753 | 0.9115 | 1.5154  | 0.3391 | -0.0150 | 0.0146 | 0.4127 | 1.7762 | 0.6201 | 66.3839  |

|                                               |                     |                           |   |        |        |        |        |         |        |        |        |        |         |
|-----------------------------------------------|---------------------|---------------------------|---|--------|--------|--------|--------|---------|--------|--------|--------|--------|---------|
| genus..Eubacteriumruminantiumgroup. id. 11340 | IschemicStroke      | Weighted median           | 4 | 1.0313 | 0.9316 | 1.1418 | 0.5521 | -0.0150 | 0.0146 | 0.4127 | 1.7762 | 0.6201 | 66.3839 |
| genus..Eubacteriumruminantiumgroup. id. 11340 | IschemicStroke      | Inverse variance weighted | 4 | 1.0369 | 0.9517 | 1.1297 | 0.4073 | -0.0150 | 0.0146 | 0.4127 | 1.7762 | 0.6201 | 66.3839 |
| genus..Eubacteriumruminantiumgroup. id. 11340 | IschemicStroke      | Simple mode               | 4 | 1.0156 | 0.8792 | 1.1731 | 0.8469 | -0.0150 | 0.0146 | 0.4127 | 1.7762 | 0.6201 | 66.3839 |
| genus..Eubacteriumruminantiumgroup. id. 11340 | IschemicStroke      | Weighted mode             | 4 | 1.0247 | 0.8984 | 1.1687 | 0.7405 | -0.0150 | 0.0146 | 0.4127 | 1.7762 | 0.6201 | 66.3839 |
| genus..Eubacteriumruminantiumgroup. id. 11340 | LargeArteryStroke   | MR Egger                  | 4 | 1.9856 | 0.8521 | 4.6273 | 0.2530 | -0.0639 | 0.0474 | 0.3100 | 2.5570 | 0.4651 | 11.4783 |
| genus..Eubacteriumruminantiumgroup. id. 11340 | LargeArteryStroke   | Weighted median           | 4 | 1.1345 | 0.8104 | 1.5881 | 0.4623 | -0.0639 | 0.0474 | 0.3100 | 2.5570 | 0.4651 | 11.4783 |
| genus..Eubacteriumruminantiumgroup. id. 11340 | LargeArteryStroke   | Inverse variance weighted | 4 | 1.1456 | 0.8693 | 1.5096 | 0.3343 | -0.0639 | 0.0474 | 0.3100 | 2.5570 | 0.4651 | 11.4783 |
| genus..Eubacteriumruminantiumgroup. id. 11340 | LargeArteryStroke   | Simple mode               | 4 | 1.1523 | 0.7039 | 1.8865 | 0.6123 | -0.0639 | 0.0474 | 0.3100 | 2.5570 | 0.4651 | 11.4783 |
| genus..Eubacteriumruminantiumgroup. id. 11340 | LargeArteryStroke   | Weighted mode             | 4 | 1.1259 | 0.6761 | 1.8751 | 0.6795 | -0.0639 | 0.0474 | 0.3100 | 2.5570 | 0.4651 | 11.4783 |
| genus..Eubacteriumruminantiumgroup. id. 11340 | SmallVesselStroke   | MR Egger                  | 4 | 1.5731 | 0.7167 | 3.4530 | 0.3759 | -0.0513 | 0.0440 | 0.3641 | 1.7139 | 0.6338 | 27.8189 |
| genus..Eubacteriumruminantiumgroup. id. 11340 | SmallVesselStroke   | Weighted median           | 4 | 1.0268 | 0.7710 | 1.3674 | 0.8566 | -0.0513 | 0.0440 | 0.3641 | 1.7139 | 0.6338 | 27.8189 |
| genus..Eubacteriumruminantiumgroup. id. 11340 | SmallVesselStroke   | Inverse variance weighted | 4 | 1.0109 | 0.7839 | 1.3035 | 0.9337 | -0.0513 | 0.0440 | 0.3641 | 1.7139 | 0.6338 | 27.8189 |
| genus..Eubacteriumruminantiumgroup. id. 11340 | SmallVesselStroke   | Simple mode               | 4 | 1.1184 | 0.7210 | 1.7348 | 0.6517 | -0.0513 | 0.0440 | 0.3641 | 1.7139 | 0.6338 | 27.8189 |
| genus..Eubacteriumruminantiumgroup. id. 11340 | SmallVesselStroke   | Weighted mode             | 4 | 1.0965 | 0.7141 | 1.6838 | 0.7021 | -0.0513 | 0.0440 | 0.3641 | 1.7139 | 0.6338 | 27.8189 |
| genus..Eubacteriumruminantiumgroup. id. 11340 | Stroke              | MR Egger                  | 4 | 1.1233 | 0.8881 | 1.4208 | 0.4345 | -0.0095 | 0.0135 | 0.5533 | 0.5267 | 0.7685 | 85.3554 |
| genus..Eubacteriumruminantiumgroup. id. 11340 | Stroke              | Weighted median           | 4 | 1.0338 | 0.9465 | 1.1293 | 0.4601 | -0.0095 | 0.0135 | 0.5533 | 0.5267 | 0.7685 | 85.3554 |
| genus..Eubacteriumruminantiumgroup. id. 11340 | Stroke              | Inverse variance weighted | 4 | 1.0372 | 0.9583 | 1.1226 | 0.3653 | -0.0095 | 0.0135 | 0.5533 | 0.5267 | 0.7685 | 85.3554 |
| genus..Eubacteriumruminantiumgroup. id. 11340 | Stroke              | Simple mode               | 4 | 1.0238 | 0.9021 | 1.1619 | 0.7399 | -0.0095 | 0.0135 | 0.5533 | 0.5267 | 0.7685 | 85.3554 |
| genus..Eubacteriumruminantiumgroup. id. 11340 | Stroke              | Weighted mode             | 4 | 1.0296 | 0.9109 | 1.1637 | 0.6724 | -0.0095 | 0.0135 | 0.5533 | 0.5267 | 0.7685 | 85.3554 |
| genus..Eubacteriumventriosumgroup. id. 11341  | CardioEmbolicStroke | MR Egger                  | 4 | 0.4830 | 0.1946 | 1.1986 | 0.2571 | 0.0675  | 0.0358 | 0.1997 | 4.4968 | 0.2126 | 11.0305 |
| genus..Eubacteriumventriosumgroup. id. 11341  | CardioEmbolicStroke | Weighted median           | 4 | 1.0423 | 0.7309 | 1.4863 | 0.8191 | 0.0675  | 0.0358 | 0.1997 | 4.4968 | 0.2126 | 11.0305 |
| genus..Eubacteriumventriosumgroup. id. 11341  | CardioEmbolicStroke | Inverse variance weighted | 4 | 1.1032 | 0.7636 | 1.5938 | 0.6007 | 0.0675  | 0.0358 | 0.1997 | 4.4968 | 0.2126 | 11.0305 |
| genus..Eubacteriumventriosumgroup. id. 11341  | CardioEmbolicStroke | Simple mode               | 4 | 0.8496 | 0.4397 | 1.6415 | 0.6609 | 0.0675  | 0.0358 | 0.1997 | 4.4968 | 0.2126 | 11.0305 |
| genus..Eubacteriumventriosumgroup. id. 11341  | CardioEmbolicStroke | Weighted mode             | 4 | 0.8422 | 0.4687 | 1.5131 | 0.6058 | 0.0675  | 0.0358 | 0.1997 | 4.4968 | 0.2126 | 11.0305 |
| genus..Eubacteriumventriosumgroup. id. 11341  | IschemicStroke      | MR Egger                  | 4 | 0.6528 | 0.4445 | 0.9587 | 0.1616 | 0.0370  | 0.0154 | 0.1380 | 7.4098 | 0.0599 | 21.6026 |
| genus..Eubacteriumventriosumgroup. id. 11341  | IschemicStroke      | Weighted median           | 4 | 0.9792 | 0.8269 | 1.1596 | 0.8079 | 0.0370  | 0.0154 | 0.1380 | 7.4098 | 0.0599 | 21.6026 |
| genus..Eubacteriumventriosumgroup. id. 11341  | IschemicStroke      | Inverse variance weighted | 4 | 1.0180 | 0.8320 | 1.2457 | 0.8622 | 0.0370  | 0.0154 | 0.1380 | 7.4098 | 0.0599 | 21.6026 |
| genus..Eubacteriumventriosumgroup. id. 11341  | IschemicStroke      | Simple mode               | 4 | 0.8860 | 0.6241 | 1.2578 | 0.5468 | 0.0370  | 0.0154 | 0.1380 | 7.4098 | 0.0599 | 21.6026 |
| genus..Eubacteriumventriosumgroup. id. 11341  | IschemicStroke      | Weighted mode             | 4 | 0.8796 | 0.6854 | 1.1290 | 0.3881 | 0.0370  | 0.0154 | 0.1380 | 7.4098 | 0.0599 | 21.6026 |
| genus..Eubacteriumventriosumgroup. id. 11341  | LargeArteryStroke   | MR Egger                  | 4 | 1.0847 | 0.3134 | 3.7542 | 0.9096 | 0.0013  | 0.0483 | 0.9809 | 1.6072 | 0.4477 | 10.8021 |
| genus..Eubacteriumventriosumgroup. id. 11341  | LargeArteryStroke   | Weighted median           | 4 | 1.0539 | 0.6484 | 1.7131 | 0.8322 | 0.0013  | 0.0483 | 0.9809 | 1.6072 | 0.4477 | 10.8021 |
| genus..Eubacteriumventriosumgroup. id. 11341  | LargeArteryStroke   | Inverse variance weighted | 4 | 1.1024 | 0.7334 | 1.6570 | 0.6392 | 0.0013  | 0.0483 | 0.9809 | 1.6072 | 0.4477 | 10.8021 |
| genus..Eubacteriumventriosumgroup. id. 11341  | LargeArteryStroke   | Simple mode               | 4 | 0.9837 | 0.5009 | 1.9319 | 0.9650 | 0.0013  | 0.0483 | 0.9809 | 1.6072 | 0.4477 | 10.8021 |
| genus..Eubacteriumventriosumgroup. id. 11341  | LargeArteryStroke   | Weighted mode             | 4 | 1.0056 | 0.5588 | 1.8096 | 0.9864 | 0.0013  | 0.0483 | 0.9809 | 1.6072 | 0.4477 | 10.8021 |
| genus..Eubacteriumventriosumgroup. id. 11341  | SmallVesselStroke   | MR Egger                  | 4 | 0.5092 | 0.1559 | 1.6629 | 0.3799 | 0.0816  | 0.0459 | 0.2176 | 3.3500 | 0.3407 | 7.7038  |
| genus..Eubacteriumventriosumgroup. id. 11341  | SmallVesselStroke   | Weighted median           | 4 | 1.4295 | 0.8952 | 2.2829 | 0.1346 | 0.0816  | 0.0459 | 0.2176 | 3.3500 | 0.3407 | 7.7038  |
| genus..Eubacteriumventriosumgroup. id. 11341  | SmallVesselStroke   | Inverse variance weighted | 4 | 1.4064 | 0.9416 | 2.1007 | 0.0957 | 0.0816  | 0.0459 | 0.2176 | 3.3500 | 0.3407 | 7.7038  |
| genus..Eubacteriumventriosumgroup. id. 11341  | SmallVesselStroke   | Simple mode               | 4 | 1.4595 | 0.6593 | 3.2306 | 0.4198 | 0.0816  | 0.0459 | 0.2176 | 3.3500 | 0.3407 | 7.7038  |
| genus..Eubacteriumventriosumgroup. id. 11341  | SmallVesselStroke   | Weighted mode             | 4 | 1.4595 | 0.7337 | 2.9032 | 0.3602 | 0.0816  | 0.0459 | 0.2176 | 3.3500 | 0.3407 | 7.7038  |
| genus..Eubacteriumventriosumgroup. id. 11341  | Stroke              | MR Egger                  | 4 | 0.6739 | 0.4731 | 0.9599 | 0.1603 | 0.0318  | 0.0142 | 0.1539 | 6.9998 | 0.0719 | 20.1096 |
| genus..Eubacteriumventriosumgroup. id. 11341  | Stroke              | Weighted median           | 4 | 0.9568 | 0.8200 | 1.1165 | 0.5752 | 0.0318  | 0.0142 | 0.1539 | 6.9998 | 0.0719 | 20.1096 |
| genus..Eubacteriumventriosumgroup. id. 11341  | Stroke              | Inverse variance weighted | 4 | 0.9872 | 0.8238 | 1.1830 | 0.8887 | 0.0318  | 0.0142 | 0.1539 | 6.9998 | 0.0719 | 20.1096 |
| genus..Eubacteriumventriosumgroup. id. 11341  | Stroke              | Simple mode               | 4 | 1.1455 | 0.8375 | 1.5668 | 0.4576 | 0.0318  | 0.0142 | 0.1539 | 6.9998 | 0.0719 | 20.1096 |
| genus..Eubacteriumventriosumgroup. id. 11341  | Stroke              | Weighted mode             | 4 | 0.8767 | 0.6870 | 1.1188 | 0.3678 | 0.0318  | 0.0142 | 0.1539 | 6.9998 | 0.0719 | 20.1096 |
| genus..Ruminococcusgavreuii group. id. 11342  | CardioEmbolicStroke | Inverse variance weighted | 2 | 1.0760 | 0.6908 | 1.6759 | 0.7460 | NA      | NA     | NA     | 1.2497 | 0.2636 | 9.0242  |
| genus..Ruminococcusgavreuii group. id. 11342  | IschemicStroke      | Inverse variance weighted | 2 | 1.1329 | 0.8114 | 1.5819 | 0.4637 | NA      | NA     | NA     | 3.3744 | 0.0662 | 11.0224 |
| genus..Ruminococcusgavreuii group. id. 11342  | LargeArteryStroke   | Inverse variance weighted | 2 | 1.3401 | 0.5519 | 3.2542 | 0.5178 | NA      | NA     | NA     | 2.8511 | 0.0913 | 2.9408  |
| genus..Ruminococcusgavreuii group. id. 11342  | SmallVesselStroke   | Inverse variance weighted | 2 | 1.2722 | 0.7760 | 2.0856 | 0.3398 | NA      | NA     | NA     | 0.0687 | 0.7933 | 8.4162  |
| genus..Ruminococcusgavreuii group. id. 11342  | Stroke              | Inverse variance weighted | 2 | 1.1509 | 0.8736 | 1.5161 | 0.3176 | NA      | NA     | NA     | 2.7241 | 0.0988 | 11.7208 |
| genus..Ruminococcusgnavusgroup. id. 14376     | CardioEmbolicStroke | MR Egger                  | 3 | 0.9093 | 0.4460 | 1.8538 | 0.8371 | 0.0144  | 0.0367 | 0.7626 | 0.1807 | 0.6708 | 79.9117 |
| genus..Ruminococcusgnavusgroup. id. 14376     | CardioEmbolicStroke | Weighted median           | 3 | 1.0241 | 0.7836 | 1.3384 | 0.8618 | 0.0144  | 0.0367 | 0.7626 | 0.1807 | 0.6708 | 79.9117 |
| genus..Ruminococcusgnavusgroup. id. 14376     | CardioEmbolicStroke | Inverse variance weighted | 3 | 1.0410 | 0.8356 | 1.2968 | 0.7202 | 0.0144  | 0.0367 | 0.7626 | 0.1807 | 0.6708 | 79.9117 |
| genus..Ruminococcusgnavusgroup. id. 14376     | CardioEmbolicStroke | Simple mode               | 3 | 1.0098 | 0.7605 | 1.3407 | 0.9526 | 0.0144  | 0.0367 | 0.7626 | 0.1807 | 0.6708 | 79.9117 |
| genus..Ruminococcusgnavusgroup. id. 14376     | CardioEmbolicStroke | Weighted mode             | 3 | 1.0058 | 0.7486 | 1.3515 | 0.9726 | 0.0144  | 0.0367 | 0.7626 | 0.1807 | 0.6708 | 79.9117 |

|                                              |                     |                           |   |        |        |        |        |         |        |        |        |        |          |
|----------------------------------------------|---------------------|---------------------------|---|--------|--------|--------|--------|---------|--------|--------|--------|--------|----------|
| genus. . Ruminococcusgnavusgroup. id. 14376  | IschemicStroke      | MR Egger                  | 3 | 0.9491 | 0.3801 | 2.3700 | 0.9290 | 0.0093  | 0.0472 | 0.8764 | 8.5448 | 0.0035 | 40.6948  |
| genus. . Ruminococcusgnavusgroup. id. 14376  | IschemicStroke      | Weighted median           | 3 | 1.0120 | 0.8759 | 1.1693 | 0.8713 | 0.0093  | 0.0472 | 0.8764 | 8.5448 | 0.0035 | 40.6948  |
| genus. . Ruminococcusgnavusgroup. id. 14376  | IschemicStroke      | Inverse variance weighted | 3 | 1.0357 | 0.8454 | 1.2688 | 0.7349 | 0.0093  | 0.0472 | 0.8764 | 8.5448 | 0.0035 | 40.6948  |
| genus. . Ruminococcusgnavusgroup. id. 14376  | IschemicStroke      | Simple mode               | 3 | 0.9967 | 0.8038 | 1.2359 | 0.9788 | 0.0093  | 0.0472 | 0.8764 | 8.5448 | 0.0035 | 40.6948  |
| genus. . Ruminococcusgnavusgroup. id. 14376  | IschemicStroke      | Weighted mode             | 3 | 0.9922 | 0.8113 | 1.2134 | 0.9461 | 0.0093  | 0.0472 | 0.8764 | 8.5448 | 0.0035 | 40.6948  |
| genus. . Ruminococcusgnavusgroup. id. 14376  | LargeArteryStroke   | MR Egger                  | 3 | 0.7789 | 0.2793 | 2.1721 | 0.7163 | 0.0488  | 0.0522 | 0.5218 | 1.0583 | 0.3036 | 17.6777  |
| genus. . Ruminococcusgnavusgroup. id. 14376  | LargeArteryStroke   | Weighted median           | 3 | 1.0874 | 0.7378 | 1.6027 | 0.6720 | 0.0488  | 0.0522 | 0.5218 | 1.0583 | 0.3036 | 17.6777  |
| genus. . Ruminococcusgnavusgroup. id. 14376  | LargeArteryStroke   | Inverse variance weighted | 3 | 1.2413 | 0.9202 | 1.6743 | 0.1569 | 0.0488  | 0.0522 | 0.5218 | 1.0583 | 0.3036 | 17.6777  |
| genus. . Ruminococcusgnavusgroup. id. 14376  | LargeArteryStroke   | Simple mode               | 3 | 1.0713 | 0.6647 | 1.7264 | 0.8040 | 0.0488  | 0.0522 | 0.5218 | 1.0583 | 0.3036 | 17.6777  |
| genus. . Ruminococcusgnavusgroup. id. 14376  | LargeArteryStroke   | Weighted mode             | 3 | 1.0713 | 0.6796 | 1.6887 | 0.7949 | 0.0488  | 0.0522 | 0.5218 | 1.0583 | 0.3036 | 17.6777  |
| genus. . Ruminococcusgnavusgroup. id. 14376  | SmallVesselStroke   | MR Egger                  | 3 | 1.6642 | 0.3499 | 7.9154 | 0.6375 | -0.0262 | 0.0811 | 0.8008 | 3.2381 | 0.0719 | 6.6241   |
| genus. . Ruminococcusgnavusgroup. id. 14376  | SmallVesselStroke   | Weighted median           | 3 | 1.4440 | 0.9963 | 2.0931 | 0.0523 | -0.0262 | 0.0811 | 0.8008 | 3.2381 | 0.0719 | 6.6241   |
| genus. . Ruminococcusgnavusgroup. id. 14376  | SmallVesselStroke   | Inverse variance weighted | 3 | 1.3034 | 0.9061 | 1.8749 | 0.1532 | -0.0262 | 0.0811 | 0.8008 | 3.2381 | 0.0719 | 6.6241   |
| genus. . Ruminococcusgnavusgroup. id. 14376  | SmallVesselStroke   | Simple mode               | 3 | 1.5653 | 0.9668 | 2.5343 | 0.2100 | -0.0262 | 0.0811 | 0.8008 | 3.2381 | 0.0719 | 6.6241   |
| genus. . Ruminococcusgnavusgroup. id. 14376  | SmallVesselStroke   | Weighted mode             | 3 | 1.5562 | 0.9535 | 2.5399 | 0.2188 | -0.0262 | 0.0811 | 0.8008 | 3.2381 | 0.0719 | 6.6241   |
| genus. . Ruminococcusgnavusgroup. id. 14376  | Stroke              | MR Egger                  | 3 | 0.9741 | 0.4232 | 2.2423 | 0.9608 | 0.0092  | 0.0430 | 0.8662 | 8.4741 | 0.0036 | 40.0017  |
| genus. . Ruminococcusgnavusgroup. id. 14376  | Stroke              | Weighted median           | 3 | 1.0310 | 0.8972 | 1.1848 | 0.6666 | 0.0092  | 0.0430 | 0.8662 | 8.4741 | 0.0036 | 40.0017  |
| genus. . Ruminococcusgnavusgroup. id. 14376  | Stroke              | Inverse variance weighted | 3 | 1.0619 | 0.8816 | 1.2792 | 0.5269 | 0.0092  | 0.0430 | 0.8662 | 8.4741 | 0.0036 | 40.0017  |
| genus. . Ruminococcusgnavusgroup. id. 14376  | Stroke              | Simple mode               | 3 | 1.0195 | 0.8378 | 1.2405 | 0.8649 | 0.0092  | 0.0430 | 0.8662 | 8.4741 | 0.0036 | 40.0017  |
| genus. . Ruminococcusgnavusgroup. id. 14376  | Stroke              | Weighted mode             | 3 | 1.0089 | 0.8566 | 1.1883 | 0.9250 | 0.0092  | 0.0430 | 0.8662 | 8.4741 | 0.0036 | 40.0017  |
| genus. . Ruminococcustorquesgroup. id. 14377 | CardioEmbolicStroke | Inverse variance weighted | 2 | 0.9833 | 0.6402 | 1.5102 | 0.9386 | NA      | NA     | NA     | 0.0040 | 0.9498 | 177.5970 |
| genus. . Ruminococcustorquesgroup. id. 14377 | IschemicStroke      | Inverse variance weighted | 2 | 0.7180 | 0.4192 | 1.2298 | 0.2276 | NA      | NA     | NA     | 8.3457 | 0.0039 | 5.9740   |
| genus. . Ruminococcustorquesgroup. id. 14377 | LargeArteryStroke   | Inverse variance weighted | 2 | 0.5212 | 0.2927 | 0.9282 | 0.0269 | NA      | NA     | NA     | 0.8174 | 0.3659 | 2.5452   |
| genus. . Ruminococcustorquesgroup. id. 14377 | SmallVesselStroke   | Inverse variance weighted | 2 | 0.5897 | 0.3436 | 1.0121 | 0.0553 | NA      | NA     | NA     | 0.0133 | 0.9082 | 2.8788   |
| genus. . Ruminococcustorquesgroup. id. 14377 | Stroke              | Inverse variance weighted | 2 | 0.7398 | 0.4996 | 1.0956 | 0.1325 | NA      | NA     | NA     | 5.2952 | 0.0214 | 7.3367   |
| genus. Adlercreutzia. id. 812                | CardioEmbolicStroke | Inverse variance weighted | 2 | 0.6801 | 0.4159 | 1.1123 | 0.1246 | NA      | NA     | NA     | 1.8700 | 0.1715 | 3.1355   |
| genus. Adlercreutzia. id. 812                | IschemicStroke      | Inverse variance weighted | 2 | 1.0908 | 0.8965 | 1.3273 | 0.3851 | NA      | NA     | NA     | 1.6385 | 0.2005 | 27.8004  |
| genus. Adlercreutzia. id. 812                | LargeArteryStroke   | Inverse variance weighted | 2 | 1.3100 | 0.7930 | 2.1641 | 0.2917 | NA      | NA     | NA     | 0.1590 | 0.6901 | 6.5817   |
| genus. Adlercreutzia. id. 812                | SmallVesselStroke   | Inverse variance weighted | 2 | 1.3859 | 0.8748 | 2.1956 | 0.1645 | NA      | NA     | NA     | 0.9226 | 0.3368 | 7.2454   |
| genus. Adlercreutzia. id. 812                | Stroke              | Inverse variance weighted | 2 | 1.0286 | 0.8694 | 1.2170 | 0.7424 | NA      | NA     | NA     | 1.4350 | 0.2310 | 38.3513  |
| genus. Allisonella. id. 2174                 | CardioEmbolicStroke | Inverse variance weighted | 2 | 1.0801 | 0.8833 | 1.3207 | 0.4530 | NA      | NA     | NA     | 0.0441 | 0.8337 | 53.0061  |
| genus. Allisonella. id. 2174                 | IschemicStroke      | Inverse variance weighted | 2 | 1.0312 | 0.9451 | 1.1251 | 0.4899 | NA      | NA     | NA     | 0.3365 | 0.5619 | 114.5282 |
| genus. Allisonella. id. 2174                 | LargeArteryStroke   | Inverse variance weighted | 2 | 0.9656 | 0.7167 | 1.3011 | 0.8182 | NA      | NA     | NA     | 1.1785 | 0.2777 | 23.6791  |
| genus. Allisonella. id. 2174                 | SmallVesselStroke   | Inverse variance weighted | 2 | 1.1721 | 0.9204 | 1.4927 | 0.1978 | NA      | NA     | NA     | 0.0083 | 0.9274 | 22.4387  |
| genus. Allisonella. id. 2174                 | Stroke              | Inverse variance weighted | 2 | 1.0315 | 0.9513 | 1.1184 | 0.4525 | NA      | NA     | NA     | 0.0417 | 0.8382 | 142.8568 |
| genus. Bifidobacterium. id. 436              | CardioEmbolicStroke | MR Egger                  | 4 | 0.9698 | 0.1185 | 7.9373 | 0.9798 | -0.0166 | 0.1020 | 0.8854 | 3.4247 | 0.1804 | 6.9395   |
| genus. Bifidobacterium. id. 436              | CardioEmbolicStroke | Weighted median           | 4 | 0.9295 | 0.6494 | 1.3305 | 0.6896 | -0.0166 | 0.1020 | 0.8854 | 3.4247 | 0.1804 | 6.9395   |
| genus. Bifidobacterium. id. 436              | CardioEmbolicStroke | Inverse variance weighted | 4 | 0.8163 | 0.6056 | 1.1003 | 0.1828 | -0.0166 | 0.1020 | 0.8854 | 3.4247 | 0.1804 | 6.9395   |
| genus. Bifidobacterium. id. 436              | CardioEmbolicStroke | Simple mode               | 4 | 0.6201 | 0.3520 | 1.0924 | 0.1967 | -0.0166 | 0.1020 | 0.8854 | 3.4247 | 0.1804 | 6.9395   |
| genus. Bifidobacterium. id. 436              | CardioEmbolicStroke | Weighted mode             | 4 | 0.9995 | 0.6576 | 1.5192 | 0.9983 | -0.0166 | 0.1020 | 0.8854 | 3.4247 | 0.1804 | 6.9395   |
| genus. Bifidobacterium. id. 436              | IschemicStroke      | MR Egger                  | 4 | 1.4290 | 0.7094 | 2.8784 | 0.4230 | -0.0428 | 0.0341 | 0.3363 | 2.9879 | 0.3935 | 27.5036  |
| genus. Bifidobacterium. id. 436              | IschemicStroke      | Weighted median           | 4 | 0.9326 | 0.7990 | 1.0885 | 0.3764 | -0.0428 | 0.0341 | 0.3363 | 2.9879 | 0.3935 | 27.5036  |
| genus. Bifidobacterium. id. 436              | IschemicStroke      | Inverse variance weighted | 4 | 0.9188 | 0.8147 | 1.0363 | 0.1679 | -0.0428 | 0.0341 | 0.3363 | 2.9879 | 0.3935 | 27.5036  |
| genus. Bifidobacterium. id. 436              | IschemicStroke      | Simple mode               | 4 | 0.9346 | 0.7482 | 1.1674 | 0.5930 | -0.0428 | 0.0341 | 0.3363 | 2.9879 | 0.3935 | 27.5036  |
| genus. Bifidobacterium. id. 436              | IschemicStroke      | Weighted mode             | 4 | 0.9574 | 0.7965 | 1.1509 | 0.6749 | -0.0428 | 0.0341 | 0.3363 | 2.9879 | 0.3935 | 27.5036  |
| genus. Bifidobacterium. id. 436              | LargeArteryStroke   | MR Egger                  | 3 | 0.1007 | 0.0091 | 1.1082 | 0.3118 | 0.2104  | 0.1117 | 0.3108 | 3.5562 | 0.1690 | 5.5890   |
| genus. Bifidobacterium. id. 436              | LargeArteryStroke   | Weighted median           | 3 | 1.1418 | 0.6876 | 1.8961 | 0.6082 | 0.2104  | 0.1117 | 0.3108 | 3.5562 | 0.1690 | 5.5890   |
| genus. Bifidobacterium. id. 436              | LargeArteryStroke   | Inverse variance weighted | 3 | 0.9741 | 0.5620 | 1.6883 | 0.9254 | 0.2104  | 0.1117 | 0.3108 | 3.5562 | 0.1690 | 5.5890   |
| genus. Bifidobacterium. id. 436              | LargeArteryStroke   | Simple mode               | 3 | 1.4162 | 0.6333 | 3.1668 | 0.4860 | 0.2104  | 0.1117 | 0.3108 | 3.5562 | 0.1690 | 5.5890   |
| genus. Bifidobacterium. id. 436              | LargeArteryStroke   | Weighted mode             | 3 | 0.6481 | 0.3700 | 1.1351 | 0.2686 | 0.2104  | 0.1117 | 0.3108 | 3.5562 | 0.1690 | 5.5890   |
| genus. Bifidobacterium. id. 436              | SmallVesselStroke   | MR Egger                  | 4 | 0.8756 | 0.1220 | 6.2838 | 0.9070 | 0.0128  | 0.0957 | 0.9055 | 1.8924 | 0.3882 | 12.2633  |
| genus. Bifidobacterium. id. 436              | SmallVesselStroke   | Weighted median           | 4 | 1.0122 | 0.6720 | 1.5246 | 0.9538 | 0.0128  | 0.0957 | 0.9055 | 1.8924 | 0.3882 | 12.2633  |
| genus. Bifidobacterium. id. 436              | SmallVesselStroke   | Inverse variance weighted | 4 | 1.0001 | 0.7117 | 1.4056 | 0.9993 | 0.0128  | 0.0957 | 0.9055 | 1.8924 | 0.3882 | 12.2633  |
| genus. Bifidobacterium. id. 436              | SmallVesselStroke   | Simple mode               | 4 | 1.2517 | 0.6702 | 2.3379 | 0.5319 | 0.0128  | 0.0957 | 0.9055 | 1.8924 | 0.3882 | 12.2633  |

|                                 |                     |                           |   |        |        |        |        |         |        |        |        |        |         |
|---------------------------------|---------------------|---------------------------|---|--------|--------|--------|--------|---------|--------|--------|--------|--------|---------|
| genus. Bifidobacterium. id. 436 | SmallVesselStroke   | Weighted mode             | 4 | 0.8316 | 0.4802 | 1.4402 | 0.5575 | 0.0128  | 0.0957 | 0.9055 | 1.8924 | 0.3882 | 12.2633 |
| genus. Bifidobacterium. id. 436 | Stroke              | MR Egger                  | 4 | 1.1097 | 0.5734 | 2.1477 | 0.7866 | -0.0211 | 0.0321 | 0.5789 | 2.0699 | 0.3552 | 24.9344 |
| genus. Bifidobacterium. id. 436 | Stroke              | Weighted median           | 4 | 0.9301 | 0.8149 | 1.0617 | 0.2833 | -0.0211 | 0.0321 | 0.5789 | 2.0699 | 0.3552 | 24.9344 |
| genus. Bifidobacterium. id. 436 | Stroke              | Inverse variance weighted | 4 | 0.8924 | 0.7982 | 0.9977 | 0.0454 | -0.0211 | 0.0321 | 0.5789 | 2.0699 | 0.3552 | 24.9344 |
| genus. Bifidobacterium. id. 436 | Stroke              | Simple mode               | 4 | 0.9354 | 0.7827 | 1.1179 | 0.5158 | -0.0211 | 0.0321 | 0.5789 | 2.0699 | 0.3552 | 24.9344 |
| genus. Bifidobacterium. id. 436 | Stroke              | Weighted mode             | 4 | 0.9354 | 0.7963 | 1.0988 | 0.4758 | -0.0211 | 0.0321 | 0.5789 | 2.0699 | 0.3552 | 24.9344 |
| genus. Bilophila. id. 3170      | CardioEmbolicStroke | Inverse variance weighted | 2 | 1.0203 | 0.7052 | 1.4763 | 0.9149 | NA      | NA     | NA     | 0.9052 | 0.3414 | 12.7543 |
| genus. Bilophila. id. 3170      | IschemicStroke      | Inverse variance weighted | 2 | 0.9390 | 0.7951 | 1.1088 | 0.4578 | NA      | NA     | NA     | 0.4747 | 0.4908 | 37.4985 |
| genus. Bilophila. id. 3170      | LargeArteryStroke   | Inverse variance weighted | 2 | 0.7514 | 0.4121 | 1.3703 | 0.3512 | NA      | NA     | NA     | 1.4837 | 0.2232 | 5.4258  |
| genus. Bilophila. id. 3170      | SmallVesselStroke   | Inverse variance weighted | 2 | 1.0490 | 0.4115 | 2.6741 | 0.9202 | NA      | NA     | NA     | 4.1087 | 0.0427 | 3.5659  |
| genus. Bilophila. id. 3170      | Stroke              | Inverse variance weighted | 2 | 0.9219 | 0.7509 | 1.1318 | 0.4370 | NA      | NA     | NA     | 1.7524 | 0.1856 | 22.9243 |
| genus. Blautia. id. 1992        | CardioEmbolicStroke | MR Egger                  | 3 | 0.6449 | 0.1477 | 2.8162 | 0.6638 | 0.0791  | 0.1306 | 0.6534 | 1.8045 | 0.1792 | 22.6637 |
| genus. Blautia. id. 1992        | CardioEmbolicStroke | Weighted median           | 3 | 1.0580 | 0.7626 | 1.4677 | 0.7359 | 0.0791  | 0.1306 | 0.6534 | 1.8045 | 0.1792 | 22.6637 |
| genus. Blautia. id. 1992        | CardioEmbolicStroke | Inverse variance weighted | 3 | 1.0039 | 0.7546 | 1.3356 | 0.9786 | 0.0791  | 0.1306 | 0.6534 | 1.8045 | 0.1792 | 22.6637 |
| genus. Blautia. id. 1992        | CardioEmbolicStroke | Simple mode               | 3 | 1.1970 | 0.7445 | 1.9247 | 0.5353 | 0.0791  | 0.1306 | 0.6534 | 1.8045 | 0.1792 | 22.6637 |
| genus. Blautia. id. 1992        | CardioEmbolicStroke | Weighted mode             | 3 | 1.1858 | 0.7526 | 1.8685 | 0.5390 | 0.0791  | 0.1306 | 0.6534 | 1.8045 | 0.1792 | 22.6637 |
| genus. Blautia. id. 1992        | IschemicStroke      | MR Egger                  | 3 | 0.5958 | 0.3693 | 0.9614 | 0.2805 | 0.0971  | 0.0419 | 0.2595 | 5.6874 | 0.0582 | 43.5596 |
| genus. Blautia. id. 1992        | IschemicStroke      | Weighted median           | 3 | 0.9862 | 0.8423 | 1.1547 | 0.8630 | 0.0971  | 0.0419 | 0.2595 | 5.6874 | 0.0582 | 43.5596 |
| genus. Blautia. id. 1992        | IschemicStroke      | Inverse variance weighted | 3 | 1.0315 | 0.8498 | 1.2522 | 0.7534 | 0.0971  | 0.0419 | 0.2595 | 5.6874 | 0.0582 | 43.5596 |
| genus. Blautia. id. 1992        | IschemicStroke      | Simple mode               | 3 | 0.9688 | 0.8133 | 1.1539 | 0.7563 | 0.0971  | 0.0419 | 0.2595 | 5.6874 | 0.0582 | 43.5596 |
| genus. Blautia. id. 1992        | IschemicStroke      | Weighted mode             | 3 | 0.9688 | 0.8363 | 1.1222 | 0.7136 | 0.0971  | 0.0419 | 0.2595 | 5.6874 | 0.0582 | 43.5596 |
| genus. Blautia. id. 1992        | LargeArteryStroke   | Inverse variance weighted | 2 | 1.0598 | 0.3412 | 3.2924 | 0.9200 | NA      | NA     | NA     | 6.3520 | 0.0117 | 4.0438  |
| genus. Blautia. id. 1992        | SmallVesselStroke   | MR Egger                  | 3 | 0.6631 | 0.1694 | 2.5960 | 0.6606 | 0.0679  | 0.1190 | 0.6701 | 0.3540 | 0.8378 | 59.8304 |
| genus. Blautia. id. 1992        | SmallVesselStroke   | Weighted median           | 3 | 0.9491 | 0.6418 | 1.4037 | 0.7938 | 0.0679  | 0.1190 | 0.6701 | 0.3540 | 0.8378 | 59.8304 |
| genus. Blautia. id. 1992        | SmallVesselStroke   | Inverse variance weighted | 3 | 0.9747 | 0.7001 | 1.3569 | 0.8792 | 0.0679  | 0.1190 | 0.6701 | 0.3540 | 0.8378 | 59.8304 |
| genus. Blautia. id. 1992        | SmallVesselStroke   | Simple mode               | 3 | 0.9365 | 0.5938 | 1.4772 | 0.8044 | 0.0679  | 0.1190 | 0.6701 | 0.3540 | 0.8378 | 59.8304 |
| genus. Blautia. id. 1992        | SmallVesselStroke   | Weighted mode             | 3 | 0.9322 | 0.6158 | 1.4110 | 0.7714 | 0.0679  | 0.1190 | 0.6701 | 0.3540 | 0.8378 | 59.8304 |
| genus. Blautia. id. 1992        | Stroke              | MR Egger                  | 3 | 0.6968 | 0.4489 | 1.0817 | 0.3539 | 0.0658  | 0.0386 | 0.3381 | 2.9060 | 0.2339 | 74.1634 |
| genus. Blautia. id. 1992        | Stroke              | Weighted median           | 3 | 0.9717 | 0.8507 | 1.1100 | 0.6726 | 0.0658  | 0.0386 | 0.3381 | 2.9060 | 0.2339 | 74.1634 |
| genus. Blautia. id. 1992        | Stroke              | Inverse variance weighted | 3 | 1.0098 | 0.8897 | 1.1460 | 0.8805 | 0.0658  | 0.0386 | 0.3381 | 2.9060 | 0.2339 | 74.1634 |
| genus. Blautia. id. 1992        | Stroke              | Simple mode               | 3 | 0.9660 | 0.8312 | 1.1226 | 0.6961 | 0.0658  | 0.0386 | 0.3381 | 2.9060 | 0.2339 | 74.1634 |
| genus. Blautia. id. 1992        | Stroke              | Weighted mode             | 3 | 0.9660 | 0.8410 | 1.1097 | 0.6732 | 0.0658  | 0.0386 | 0.3381 | 2.9060 | 0.2339 | 74.1634 |
| genus. Butyrivimonas. id. 945   | CardioEmbolicStroke | MR Egger                  | 3 | 1.0704 | 0.4203 | 2.7262 | 0.9098 | -0.0017 | 0.0407 | 0.9736 | 0.6631 | 0.4155 | 32.3140 |
| genus. Butyrivimonas. id. 945   | CardioEmbolicStroke | Weighted median           | 3 | 0.9859 | 0.7119 | 1.3655 | 0.9321 | -0.0017 | 0.0407 | 0.9736 | 0.6631 | 0.4155 | 32.3140 |
| genus. Butyrivimonas. id. 945   | CardioEmbolicStroke | Inverse variance weighted | 3 | 1.0503 | 0.7972 | 1.3838 | 0.7269 | -0.0017 | 0.0407 | 0.9736 | 0.6631 | 0.4155 | 32.3140 |
| genus. Butyrivimonas. id. 945   | CardioEmbolicStroke | Simple mode               | 3 | 0.9695 | 0.6605 | 1.4231 | 0.8890 | -0.0017 | 0.0407 | 0.9736 | 0.6631 | 0.4155 | 32.3140 |
| genus. Butyrivimonas. id. 945   | CardioEmbolicStroke | Weighted mode             | 3 | 0.9712 | 0.6496 | 1.4522 | 0.9000 | -0.0017 | 0.0407 | 0.9736 | 0.6631 | 0.4155 | 32.3140 |
| genus. Butyrivimonas. id. 945   | IschemicStroke      | MR Egger                  | 3 | 1.0893 | 0.7100 | 1.6711 | 0.7624 | 0.0029  | 0.0185 | 0.9018 | 0.5653 | 0.4522 | 30.9495 |
| genus. Butyrivimonas. id. 945   | IschemicStroke      | Weighted median           | 3 | 1.0979 | 0.9372 | 1.2863 | 0.2474 | 0.0029  | 0.0185 | 0.9018 | 0.5653 | 0.4522 | 30.9495 |
| genus. Butyrivimonas. id. 945   | IschemicStroke      | Inverse variance weighted | 3 | 1.1253 | 0.9954 | 1.2721 | 0.0593 | 0.0029  | 0.0185 | 0.9018 | 0.5653 | 0.4522 | 30.9495 |
| genus. Butyrivimonas. id. 945   | IschemicStroke      | Simple mode               | 3 | 1.0873 | 0.9067 | 1.3039 | 0.4616 | 0.0029  | 0.0185 | 0.9018 | 0.5653 | 0.4522 | 30.9495 |
| genus. Butyrivimonas. id. 945   | IschemicStroke      | Weighted mode             | 3 | 1.0863 | 0.9043 | 1.3050 | 0.4696 | 0.0029  | 0.0185 | 0.9018 | 0.5653 | 0.4522 | 30.9495 |
| genus. Butyrivimonas. id. 945   | LargeArteryStroke   | MR Egger                  | 3 | 1.5780 | 0.4591 | 5.4237 | 0.6010 | -0.0101 | 0.0538 | 0.8815 | 0.2718 | 0.6021 | 5.9907  |
| genus. Butyrivimonas. id. 945   | LargeArteryStroke   | Weighted median           | 3 | 1.4540 | 0.9323 | 2.2677 | 0.0988 | -0.0101 | 0.0538 | 0.8815 | 0.2718 | 0.6021 | 5.9907  |
| genus. Butyrivimonas. id. 945   | LargeArteryStroke   | Inverse variance weighted | 3 | 1.4091 | 0.9764 | 2.0334 | 0.0669 | -0.0101 | 0.0538 | 0.8815 | 0.2718 | 0.6021 | 5.9907  |
| genus. Butyrivimonas. id. 945   | LargeArteryStroke   | Simple mode               | 3 | 1.4940 | 0.8630 | 2.5864 | 0.2880 | -0.0101 | 0.0538 | 0.8815 | 0.2718 | 0.6021 | 5.9907  |
| genus. Butyrivimonas. id. 945   | LargeArteryStroke   | Weighted mode             | 3 | 1.5024 | 0.9109 | 2.4780 | 0.2518 | -0.0101 | 0.0538 | 0.8815 | 0.2718 | 0.6021 | 5.9907  |
| genus. Butyrivimonas. id. 945   | SmallVesselStroke   | MR Egger                  | 3 | 0.4761 | 0.1504 | 1.5075 | 0.4266 | 0.0590  | 0.0502 | 0.4490 | 1.7432 | 0.4183 | 11.6911 |
| genus. Butyrivimonas. id. 945   | SmallVesselStroke   | Weighted median           | 3 | 0.8012 | 0.5157 | 1.2448 | 0.3242 | 0.0590  | 0.0502 | 0.4490 | 1.7432 | 0.4183 | 11.6911 |
| genus. Butyrivimonas. id. 945   | SmallVesselStroke   | Inverse variance weighted | 3 | 0.9211 | 0.6552 | 1.2949 | 0.6362 | 0.0590  | 0.0502 | 0.4490 | 1.7432 | 0.4183 | 11.6911 |
| genus. Butyrivimonas. id. 945   | SmallVesselStroke   | Simple mode               | 3 | 0.7918 | 0.4507 | 1.3912 | 0.5022 | 0.0590  | 0.0502 | 0.4490 | 1.7432 | 0.4183 | 11.6911 |
| genus. Butyrivimonas. id. 945   | SmallVesselStroke   | Weighted mode             | 3 | 0.7908 | 0.4848 | 1.2898 | 0.4462 | 0.0590  | 0.0502 | 0.4490 | 1.7432 | 0.4183 | 11.6911 |
| genus. Butyrivimonas. id. 945   | Stroke              | MR Egger                  | 3 | 1.0127 | 0.6862 | 1.4945 | 0.9596 | 0.0073  | 0.0168 | 0.7383 | 0.1989 | 0.6556 | 42.5094 |
| genus. Butyrivimonas. id. 945   | Stroke              | Weighted median           | 3 | 1.1105 | 0.9686 | 1.2731 | 0.1329 | 0.0073  | 0.0168 | 0.7383 | 0.1989 | 0.6556 | 42.5094 |

|                                           |                     |                           |   |        |        |         |        |         |        |        |        |        |          |
|-------------------------------------------|---------------------|---------------------------|---|--------|--------|---------|--------|---------|--------|--------|--------|--------|----------|
| genus. Butyricimonas. id. 945             | Stroke              | Inverse variance weighted | 3 | 1.1001 | 0.9824 | 1.2319  | 0.0984 | 0.0073  | 0.0168 | 0.7383 | 0.1989 | 0.6556 | 42.5094  |
| genus. Butyricimonas. id. 945             | Stroke              | Simple mode               | 3 | 1.1264 | 0.9712 | 1.3064  | 0.2561 | 0.0073  | 0.0168 | 0.7383 | 0.1989 | 0.6556 | 42.5094  |
| genus. Butyricimonas. id. 945             | Stroke              | Weighted mode             | 3 | 1.1269 | 0.9545 | 1.3306  | 0.2939 | 0.0073  | 0.0168 | 0.7383 | 0.1989 | 0.6556 | 42.5094  |
| genus. Butyrivibrio. id. 1993             | CardioEmbolicStroke | MR Egger                  | 3 | 1.8395 | 0.7222 | 4.6855  | 0.4228 | -0.0623 | 0.0633 | 0.5049 | 0.9695 | 0.6158 | 19.2429  |
| genus. Butyrivibrio. id. 1993             | CardioEmbolicStroke | Weighted median           | 3 | 1.1087 | 0.9046 | 1.3587  | 0.3201 | -0.0623 | 0.0633 | 0.5049 | 0.9695 | 0.6158 | 19.2429  |
| genus. Butyrivibrio. id. 1993             | CardioEmbolicStroke | Inverse variance weighted | 3 | 1.1580 | 0.9873 | 1.3582  | 0.0714 | -0.0623 | 0.0633 | 0.5049 | 0.9695 | 0.6158 | 19.2429  |
| genus. Butyrivibrio. id. 1993             | CardioEmbolicStroke | Simple mode               | 3 | 1.0981 | 0.8612 | 1.4002  | 0.5292 | -0.0623 | 0.0633 | 0.5049 | 0.9695 | 0.6158 | 19.2429  |
| genus. Butyrivibrio. id. 1993             | CardioEmbolicStroke | Weighted mode             | 3 | 1.0974 | 0.8716 | 1.3816  | 0.5121 | -0.0623 | 0.0633 | 0.5049 | 0.9695 | 0.6158 | 19.2429  |
| genus. Butyrivibrio. id. 1993             | IschemicStroke      | MR Egger                  | 3 | 1.0092 | 0.6048 | 1.6840  | 0.9776 | -0.0019 | 0.0346 | 0.9659 | 1.5249 | 0.2169 | 143.3599 |
| genus. Butyrivibrio. id. 1993             | IschemicStroke      | Weighted median           | 3 | 0.9877 | 0.9002 | 1.0837  | 0.7938 | -0.0019 | 0.0346 | 0.9659 | 1.5249 | 0.2169 | 143.3599 |
| genus. Butyrivibrio. id. 1993             | IschemicStroke      | Inverse variance weighted | 3 | 0.9954 | 0.9281 | 1.0676  | 0.8970 | -0.0019 | 0.0346 | 0.9659 | 1.5249 | 0.2169 | 143.3599 |
| genus. Butyrivibrio. id. 1993             | IschemicStroke      | Simple mode               | 3 | 0.9784 | 0.8727 | 1.0969  | 0.7441 | -0.0019 | 0.0346 | 0.9659 | 1.5249 | 0.2169 | 143.3599 |
| genus. Butyrivibrio. id. 1993             | IschemicStroke      | Weighted mode             | 3 | 0.9745 | 0.8744 | 1.0861  | 0.6869 | -0.0019 | 0.0346 | 0.9659 | 1.5249 | 0.2169 | 143.3599 |
| genus. Butyrivibrio. id. 1993             | LargeArteryStroke   | MR Egger                  | 3 | 3.2604 | 0.9202 | 11.5514 | 0.3182 | -0.1628 | 0.0853 | 0.3072 | 3.6690 | 0.1597 | 15.6280  |
| genus. Butyrivibrio. id. 1993             | LargeArteryStroke   | Weighted median           | 3 | 0.8550 | 0.6348 | 1.1517  | 0.3028 | -0.1628 | 0.0853 | 0.3072 | 3.6690 | 0.1597 | 15.6280  |
| genus. Butyrivibrio. id. 1993             | LargeArteryStroke   | Inverse variance weighted | 3 | 0.9679 | 0.7258 | 1.2908  | 0.8243 | -0.1628 | 0.0853 | 0.3072 | 3.6690 | 0.1597 | 15.6280  |
| genus. Butyrivibrio. id. 1993             | LargeArteryStroke   | Simple mode               | 3 | 0.8447 | 0.6042 | 1.1810  | 0.4277 | -0.1628 | 0.0853 | 0.3072 | 3.6690 | 0.1597 | 15.6280  |
| genus. Butyrivibrio. id. 1993             | LargeArteryStroke   | Weighted mode             | 3 | 0.8437 | 0.6086 | 1.1696  | 0.4150 | -0.1628 | 0.0853 | 0.3072 | 3.6690 | 0.1597 | 15.6280  |
| genus. Butyrivibrio. id. 1993             | SmallVesselStroke   | MR Egger                  | 3 | 1.1328 | 0.3533 | 3.6320  | 0.8684 | -0.0098 | 0.0787 | 0.9212 | 0.8604 | 0.3536 | 48.3403  |
| genus. Butyrivibrio. id. 1993             | SmallVesselStroke   | Weighted median           | 3 | 1.0429 | 0.8201 | 1.3263  | 0.7319 | -0.0098 | 0.0787 | 0.9212 | 0.8604 | 0.3536 | 48.3403  |
| genus. Butyrivibrio. id. 1993             | SmallVesselStroke   | Inverse variance weighted | 3 | 1.0531 | 0.8643 | 1.2832  | 0.6076 | -0.0098 | 0.0787 | 0.9212 | 0.8604 | 0.3536 | 48.3403  |
| genus. Butyrivibrio. id. 1993             | SmallVesselStroke   | Simple mode               | 3 | 1.0339 | 0.7705 | 1.3873  | 0.8448 | -0.0098 | 0.0787 | 0.9212 | 0.8604 | 0.3536 | 48.3403  |
| genus. Butyrivibrio. id. 1993             | SmallVesselStroke   | Weighted mode             | 3 | 1.0151 | 0.7545 | 1.3656  | 0.9303 | -0.0098 | 0.0787 | 0.9212 | 0.8604 | 0.3536 | 48.3403  |
| genus. Butyrivibrio. id. 1993             | Stroke              | MR Egger                  | 3 | 1.0533 | 0.7189 | 1.5432  | 0.8343 | -0.0111 | 0.0258 | 0.7414 | 0.5721 | 0.4494 | 157.9864 |
| genus. Butyrivibrio. id. 1993             | Stroke              | Weighted median           | 3 | 0.9841 | 0.9086 | 1.0658  | 0.6933 | -0.0111 | 0.0258 | 0.7414 | 0.5721 | 0.4494 | 157.9864 |
| genus. Butyrivibrio. id. 1993             | Stroke              | Inverse variance weighted | 3 | 0.9698 | 0.9093 | 1.0342  | 0.3498 | -0.0111 | 0.0258 | 0.7414 | 0.5721 | 0.4494 | 157.9864 |
| genus. Butyrivibrio. id. 1993             | Stroke              | Simple mode               | 3 | 0.9905 | 0.9030 | 1.0864  | 0.8580 | -0.0111 | 0.0258 | 0.7414 | 0.5721 | 0.4494 | 157.9864 |
| genus. Butyrivibrio. id. 1993             | Stroke              | Weighted mode             | 3 | 0.9907 | 0.8995 | 1.0912  | 0.8676 | -0.0111 | 0.0258 | 0.7414 | 0.5721 | 0.4494 | 157.9864 |
| genus. CandidatusSoleaferrea. id. 11350   | CardioEmbolicStroke | Inverse variance weighted | 2 | 0.8598 | 0.6408 | 1.1537  | 0.3140 | NA      | NA     | NA     | 0.0534 | 0.8173 | 27.0454  |
| genus. CandidatusSoleaferrea. id. 11350   | IschemicStroke      | Inverse variance weighted | 2 | 0.9076 | 0.8004 | 1.0291  | 0.1305 | NA      | NA     | NA     | 0.3077 | 0.5791 | 29.7457  |
| genus. CandidatusSoleaferrea. id. 11350   | LargeArteryStroke   | Inverse variance weighted | 2 | 0.8672 | 0.5216 | 1.4417  | 0.5826 | NA      | NA     | NA     | 1.5858 | 0.2079 | 14.9105  |
| genus. CandidatusSoleaferrea. id. 11350   | SmallVesselStroke   | Inverse variance weighted | 2 | 1.0994 | 0.7636 | 1.5830  | 0.6102 | NA      | NA     | NA     | 0.3133 | 0.5757 | 43.8961  |
| genus. CandidatusSoleaferrea. id. 11350   | Stroke              | Inverse variance weighted | 2 | 0.9293 | 0.8281 | 1.0430  | 0.2130 | NA      | NA     | NA     | 0.1641 | 0.6854 | 42.7455  |
| genus. Catenibacterium. id. 2153          | CardioEmbolicStroke | Inverse variance weighted | 2 | 1.1758 | 0.8728 | 1.5841  | 0.2868 | NA      | NA     | NA     | 2.4196 | 0.1198 | 13.1957  |
| genus. Catenibacterium. id. 2153          | IschemicStroke      | Inverse variance weighted | 2 | 1.0463 | 0.9528 | 1.1489  | 0.3436 | NA      | NA     | NA     | 1.2061 | 0.2721 | 60.3449  |
| genus. Catenibacterium. id. 2153          | LargeArteryStroke   | Inverse variance weighted | 2 | 1.0738 | 0.8339 | 1.3827  | 0.5811 | NA      | NA     | NA     | 0.4303 | 0.5119 | 30.8642  |
| genus. Catenibacterium. id. 2153          | SmallVesselStroke   | Inverse variance weighted | 2 | 1.0679 | 0.6629 | 1.7202  | 0.7872 | NA      | NA     | NA     | 3.9956 | 0.0456 | 11.2253  |
| genus. Catenibacterium. id. 2153          | Stroke              | Inverse variance weighted | 2 | 1.0398 | 0.8968 | 1.2055  | 0.6053 | NA      | NA     | NA     | 3.5145 | 0.0608 | 45.1081  |
| genus. Clostridiumsensustricto1. id. 1873 | CardioEmbolicStroke | Inverse variance weighted | 2 | 1.1253 | 0.7910 | 1.6008  | 0.5115 | NA      | NA     | NA     | 0.3544 | 0.5516 | 22.3143  |
| genus. Clostridiumsensustricto1. id. 1873 | IschemicStroke      | Inverse variance weighted | 2 | 0.9906 | 0.8609 | 1.1399  | 0.8950 | NA      | NA     | NA     | 0.2060 | 0.6500 | 147.8914 |
| genus. Clostridiumsensustricto1. id. 1873 | Stroke              | Inverse variance weighted | 2 | 0.9889 | 0.8359 | 1.1700  | 0.8968 | NA      | NA     | NA     | 1.7207 | 0.1896 | 52.0105  |
| genus. Collinsella. id. 815               | CardioEmbolicStroke | Inverse variance weighted | 2 | 0.8551 | 0.5747 | 1.2723  | 0.4400 | NA      | NA     | NA     | 0.0302 | 0.8620 | 18.0349  |
| genus. Collinsella. id. 815               | IschemicStroke      | Inverse variance weighted | 2 | 1.0000 | 0.8438 | 1.1850  | 0.9997 | NA      | NA     | NA     | 0.1732 | 0.6773 | 90.0785  |
| genus. Collinsella. id. 815               | LargeArteryStroke   | Inverse variance weighted | 2 | 1.0545 | 0.6197 | 1.7944  | 0.8448 | NA      | NA     | NA     | 0.2942 | 0.5875 | 21.1419  |
| genus. Collinsella. id. 815               | SmallVesselStroke   | Inverse variance weighted | 2 | 0.8351 | 0.5084 | 1.3718  | 0.4767 | NA      | NA     | NA     | 0.3188 | 0.5723 | 8.0322   |
| genus. Collinsella. id. 815               | Stroke              | Inverse variance weighted | 2 | 0.9790 | 0.8343 | 1.1487  | 0.7945 | NA      | NA     | NA     | 0.1834 | 0.6685 | 63.2405  |
| genus. DefluviitaleaceaeUCG011. id. 11287 | CardioEmbolicStroke | Inverse variance weighted | 2 | 0.9611 | 0.6998 | 1.3200  | 0.8066 | NA      | NA     | NA     | 0.0884 | 0.7662 | 52.0793  |
| genus. DefluviitaleaceaeUCG011. id. 11287 | IschemicStroke      | Inverse variance weighted | 2 | 1.0019 | 0.8091 | 1.2407  | 0.9860 | NA      | NA     | NA     | 2.2669 | 0.1322 | 35.7058  |
| genus. DefluviitaleaceaeUCG011. id. 11287 | LargeArteryStroke   | Inverse variance weighted | 2 | 0.7551 | 0.4273 | 1.3343  | 0.3335 | NA      | NA     | NA     | 1.6235 | 0.2026 | 10.9589  |
| genus. DefluviitaleaceaeUCG011. id. 11287 | SmallVesselStroke   | Inverse variance weighted | 2 | 1.0711 | 0.4679 | 2.4520  | 0.8709 | NA      | NA     | NA     | 4.3243 | 0.0376 | 4.4166   |
| genus. DefluviitaleaceaeUCG011. id. 11287 | Stroke              | Inverse variance weighted | 2 | 1.0466 | 0.8261 | 1.3260  | 0.7059 | NA      | NA     | NA     | 3.2271 | 0.0724 | 25.1592  |
| genus. Dialister. id. 2183                | CardioEmbolicStroke | MR Egger                  | 3 | 3.0620 | 0.6035 | 15.5369 | 0.4058 | -0.0891 | 0.0592 | 0.3734 | 2.3346 | 0.3112 | 9.1407   |
| genus. Dialister. id. 2183                | CardioEmbolicStroke | Weighted median           | 3 | 0.7960 | 0.5258 | 1.2050  | 0.2808 | -0.0891 | 0.0592 | 0.3734 | 2.3346 | 0.3112 | 9.1407   |
| genus. Dialister. id. 2183                | CardioEmbolicStroke | Inverse variance weighted | 3 | 0.9021 | 0.6368 | 1.2778  | 0.5619 | -0.0891 | 0.0592 | 0.3734 | 2.3346 | 0.3112 | 9.1407   |

|                               |                     |                           |   |        |        |         |        |         |        |        |        |        |          |
|-------------------------------|---------------------|---------------------------|---|--------|--------|---------|--------|---------|--------|--------|--------|--------|----------|
| genus.Dialister.id.2183       | CardioEmbolicStroke | Simple mode               | 3 | 0.7530 | 0.4470 | 1.2686  | 0.3981 | -0.0891 | 0.0592 | 0.3734 | 2.3346 | 0.3112 | 9.1407   |
| genus.Dialister.id.2183       | CardioEmbolicStroke | Weighted mode             | 3 | 0.7540 | 0.4477 | 1.2700  | 0.3997 | -0.0891 | 0.0592 | 0.3734 | 2.3346 | 0.3112 | 9.1407   |
| genus.Dialister.id.2183       | IschemicStroke      | MR Egger                  | 3 | 1.3240 | 0.6634 | 2.6425  | 0.5720 | -0.0221 | 0.0253 | 0.5422 | 0.9850 | 0.6111 | 50.5354  |
| genus.Dialister.id.2183       | IschemicStroke      | Weighted median           | 3 | 0.9936 | 0.8405 | 1.1747  | 0.9405 | -0.0221 | 0.0253 | 0.5422 | 0.9850 | 0.6111 | 50.5354  |
| genus.Dialister.id.2183       | IschemicStroke      | Inverse variance weighted | 3 | 0.9784 | 0.8524 | 1.1230  | 0.7562 | -0.0221 | 0.0253 | 0.5422 | 0.9850 | 0.6111 | 50.5354  |
| genus.Dialister.id.2183       | IschemicStroke      | Simple mode               | 3 | 1.0141 | 0.8351 | 1.2315  | 0.9006 | -0.0221 | 0.0253 | 0.5422 | 0.9850 | 0.6111 | 50.5354  |
| genus.Dialister.id.2183       | IschemicStroke      | Weighted mode             | 3 | 1.0172 | 0.8187 | 1.2639  | 0.8918 | -0.0221 | 0.0253 | 0.5422 | 0.9850 | 0.6111 | 50.5354  |
| genus.Dialister.id.2183       | LargeArteryStroke   | MR Egger                  | 3 | 0.6671 | 0.0745 | 5.9748  | 0.7789 | 0.0333  | 0.0797 | 0.7481 | 0.1768 | 0.9154 | 31.1738  |
| genus.Dialister.id.2183       | LargeArteryStroke   | Weighted median           | 3 | 1.1241 | 0.6690 | 1.8888  | 0.6586 | 0.0333  | 0.0797 | 0.7481 | 0.1768 | 0.9154 | 31.1738  |
| genus.Dialister.id.2183       | LargeArteryStroke   | Inverse variance weighted | 3 | 1.0544 | 0.6807 | 1.6332  | 0.8126 | 0.0333  | 0.0797 | 0.7481 | 0.1768 | 0.9154 | 31.1738  |
| genus.Dialister.id.2183       | LargeArteryStroke   | Simple mode               | 3 | 1.1267 | 0.6168 | 2.0581  | 0.7354 | 0.0333  | 0.0797 | 0.7481 | 0.1768 | 0.9154 | 31.1738  |
| genus.Dialister.id.2183       | LargeArteryStroke   | Weighted mode             | 3 | 1.1277 | 0.6111 | 2.0812  | 0.7376 | 0.0333  | 0.0797 | 0.7481 | 0.1768 | 0.9154 | 31.1738  |
| genus.Dialister.id.2183       | SmallVesselStroke   | MR Egger                  | 3 | 0.9218 | 0.1104 | 7.6976  | 0.9522 | 0.0115  | 0.0763 | 0.9048 | 1.0920 | 0.2960 | 12.5180  |
| genus.Dialister.id.2183       | SmallVesselStroke   | Weighted median           | 3 | 0.9723 | 0.6034 | 1.5667  | 0.9082 | 0.0115  | 0.0763 | 0.9048 | 1.0920 | 0.2960 | 12.5180  |
| genus.Dialister.id.2183       | SmallVesselStroke   | Inverse variance weighted | 3 | 1.0818 | 0.7324 | 1.5980  | 0.6927 | 0.0115  | 0.0763 | 0.9048 | 1.0920 | 0.2960 | 12.5180  |
| genus.Dialister.id.2183       | SmallVesselStroke   | Simple mode               | 3 | 0.9566 | 0.5590 | 1.6371  | 0.8864 | 0.0115  | 0.0763 | 0.9048 | 1.0920 | 0.2960 | 12.5180  |
| genus.Dialister.id.2183       | SmallVesselStroke   | Weighted mode             | 3 | 0.9518 | 0.5467 | 1.6571  | 0.8775 | 0.0115  | 0.0763 | 0.9048 | 1.0920 | 0.2960 | 12.5180  |
| genus.Dialister.id.2183       | Stroke              | MR Egger                  | 3 | 1.2700 | 0.6726 | 2.3981  | 0.5957 | -0.0206 | 0.0233 | 0.5396 | 0.9342 | 0.6268 | 53.9893  |
| genus.Dialister.id.2183       | Stroke              | Weighted median           | 3 | 0.9679 | 0.8237 | 1.1374  | 0.6918 | -0.0206 | 0.0233 | 0.5396 | 0.9342 | 0.6268 | 53.9893  |
| genus.Dialister.id.2183       | Stroke              | Inverse variance weighted | 3 | 0.9594 | 0.8445 | 1.0900  | 0.5247 | -0.0206 | 0.0233 | 0.5396 | 0.9342 | 0.6268 | 53.9893  |
| genus.Dialister.id.2183       | Stroke              | Simple mode               | 3 | 0.9820 | 0.8115 | 1.1883  | 0.8691 | -0.0206 | 0.0233 | 0.5396 | 0.9342 | 0.6268 | 53.9893  |
| genus.Dialister.id.2183       | Stroke              | Weighted mode             | 3 | 0.9893 | 0.8144 | 1.2016  | 0.9233 | -0.0206 | 0.0233 | 0.5396 | 0.9342 | 0.6268 | 53.9893  |
| genus.Eggerthella.id.819      | CardioEmbolicStroke | MR Egger                  | 3 | 1.5482 | 0.7029 | 3.4102  | 0.4741 | -0.0455 | 0.0418 | 0.4736 | 1.4455 | 0.4854 | 24.6676  |
| genus.Eggerthella.id.819      | CardioEmbolicStroke | Weighted median           | 3 | 1.0016 | 0.7780 | 1.2895  | 0.9900 | -0.0455 | 0.0418 | 0.4736 | 1.4455 | 0.4854 | 24.6676  |
| genus.Eggerthella.id.819      | CardioEmbolicStroke | Inverse variance weighted | 3 | 1.0152 | 0.8226 | 1.2530  | 0.8879 | -0.0455 | 0.0418 | 0.4736 | 1.4455 | 0.4854 | 24.6676  |
| genus.Eggerthella.id.819      | CardioEmbolicStroke | Simple mode               | 3 | 0.9801 | 0.7233 | 1.3280  | 0.9085 | -0.0455 | 0.0418 | 0.4736 | 1.4455 | 0.4854 | 24.6676  |
| genus.Eggerthella.id.819      | CardioEmbolicStroke | Weighted mode             | 3 | 0.9652 | 0.6952 | 1.3399  | 0.8518 | -0.0455 | 0.0418 | 0.4736 | 1.4455 | 0.4854 | 24.6676  |
| genus.Eggerthella.id.819      | IschemicStroke      | MR Egger                  | 3 | 0.9724 | 0.6607 | 1.4311  | 0.9101 | -0.0001 | 0.0205 | 0.9964 | 1.2358 | 0.2663 | 98.3031  |
| genus.Eggerthella.id.819      | IschemicStroke      | Weighted median           | 3 | 0.9671 | 0.8633 | 1.0834  | 0.5636 | -0.0001 | 0.0205 | 0.9964 | 1.2358 | 0.2663 | 98.3031  |
| genus.Eggerthella.id.819      | IschemicStroke      | Inverse variance weighted | 3 | 0.9713 | 0.8849 | 1.0662  | 0.5404 | -0.0001 | 0.0205 | 0.9964 | 1.2358 | 0.2663 | 98.3031  |
| genus.Eggerthella.id.819      | IschemicStroke      | Simple mode               | 3 | 0.9601 | 0.8417 | 1.0952  | 0.6064 | -0.0001 | 0.0205 | 0.9964 | 1.2358 | 0.2663 | 98.3031  |
| genus.Eggerthella.id.819      | IschemicStroke      | Weighted mode             | 3 | 0.9562 | 0.8308 | 1.1007  | 0.5966 | -0.0001 | 0.0205 | 0.9964 | 1.2358 | 0.2663 | 98.3031  |
| genus.Eggerthella.id.819      | LargeArteryStroke   | MR Egger                  | 3 | 2.4596 | 0.8445 | 7.1637  | 0.3469 | -0.1059 | 0.0567 | 0.3131 | 4.2851 | 0.1174 | 9.3551   |
| genus.Eggerthella.id.819      | LargeArteryStroke   | Weighted median           | 3 | 0.9105 | 0.6129 | 1.3528  | 0.6426 | -0.1059 | 0.0567 | 0.3131 | 4.2851 | 0.1174 | 9.3551   |
| genus.Eggerthella.id.819      | LargeArteryStroke   | Inverse variance weighted | 3 | 0.9220 | 0.6069 | 1.4007  | 0.7034 | -0.1059 | 0.0567 | 0.3131 | 4.2851 | 0.1174 | 9.3551   |
| genus.Eggerthella.id.819      | LargeArteryStroke   | Simple mode               | 3 | 0.8032 | 0.4704 | 1.3714  | 0.5062 | -0.1059 | 0.0567 | 0.3131 | 4.2851 | 0.1174 | 9.3551   |
| genus.Eggerthella.id.819      | LargeArteryStroke   | Weighted mode             | 3 | 0.8699 | 0.5010 | 1.5105  | 0.6696 | -0.1059 | 0.0567 | 0.3131 | 4.2851 | 0.1174 | 9.3551   |
| genus.Eggerthella.id.819      | SmallVesselStroke   | MR Egger                  | 3 | 0.3613 | 0.0687 | 1.9002  | 0.4417 | 0.0940  | 0.0869 | 0.4751 | 5.5596 | 0.0620 | 5.8188   |
| genus.Eggerthella.id.819      | SmallVesselStroke   | Weighted median           | 3 | 0.8245 | 0.5574 | 1.2196  | 0.3339 | 0.0940  | 0.0869 | 0.4751 | 5.5596 | 0.0620 | 5.8188   |
| genus.Eggerthella.id.819      | SmallVesselStroke   | Inverse variance weighted | 3 | 0.8754 | 0.5605 | 1.3670  | 0.5583 | 0.0940  | 0.0869 | 0.4751 | 5.5596 | 0.0620 | 5.8188   |
| genus.Eggerthella.id.819      | SmallVesselStroke   | Simple mode               | 3 | 0.7395 | 0.4381 | 1.2482  | 0.3758 | 0.0940  | 0.0869 | 0.4751 | 5.5596 | 0.0620 | 5.8188   |
| genus.Eggerthella.id.819      | SmallVesselStroke   | Weighted mode             | 3 | 0.7618 | 0.4650 | 1.2481  | 0.3930 | 0.0940  | 0.0869 | 0.4751 | 5.5596 | 0.0620 | 5.8188   |
| genus.Eggerthella.id.819      | Stroke              | MR Egger                  | 3 | 1.0196 | 0.6740 | 1.5423  | 0.9417 | -0.0030 | 0.0220 | 0.9129 | 1.6391 | 0.2004 | 112.2241 |
| genus.Eggerthella.id.819      | Stroke              | Weighted median           | 3 | 0.9946 | 0.8882 | 1.1137  | 0.9249 | -0.0030 | 0.0220 | 0.9129 | 1.6391 | 0.2004 | 112.2241 |
| genus.Eggerthella.id.819      | Stroke              | Inverse variance weighted | 3 | 0.9914 | 0.9090 | 1.0814  | 0.8461 | -0.0030 | 0.0220 | 0.9129 | 1.6391 | 0.2004 | 112.2241 |
| genus.Eggerthella.id.819      | Stroke              | Simple mode               | 3 | 1.0145 | 0.8928 | 1.1527  | 0.8459 | -0.0030 | 0.0220 | 0.9129 | 1.6391 | 0.2004 | 112.2241 |
| genus.Eggerthella.id.819      | Stroke              | Weighted mode             | 3 | 1.0012 | 0.8733 | 1.1479  | 0.9876 | -0.0030 | 0.0220 | 0.9129 | 1.6391 | 0.2004 | 112.2241 |
| genus.Eisenbergiella.id.11304 | CardioEmbolicStroke | MR Egger                  | 3 | 0.7681 | 0.0993 | 5.9385  | 0.8423 | 0.0339  | 0.0994 | 0.7907 | 0.4558 | 0.4996 | 30.5250  |
| genus.Eisenbergiella.id.11304 | CardioEmbolicStroke | Weighted median           | 3 | 1.0364 | 0.7986 | 1.3450  | 0.7881 | 0.0339  | 0.0994 | 0.7907 | 0.4558 | 0.4996 | 30.5250  |
| genus.Eisenbergiella.id.11304 | CardioEmbolicStroke | Inverse variance weighted | 3 | 1.0944 | 0.8836 | 1.3554  | 0.4087 | 0.0339  | 0.0994 | 0.7907 | 0.4558 | 0.4996 | 30.5250  |
| genus.Eisenbergiella.id.11304 | CardioEmbolicStroke | Simple mode               | 3 | 1.0310 | 0.7572 | 1.4039  | 0.8641 | 0.0339  | 0.0994 | 0.7907 | 0.4558 | 0.4996 | 30.5250  |
| genus.Eisenbergiella.id.11304 | CardioEmbolicStroke | Weighted mode             | 3 | 1.0315 | 0.7538 | 1.4115  | 0.8641 | 0.0339  | 0.0994 | 0.7907 | 0.4558 | 0.4996 | 30.5250  |
| genus.Eisenbergiella.id.11304 | IschemicStroke      | MR Egger                  | 3 | 0.9824 | 0.0620 | 15.5548 | 0.9920 | 0.0021  | 0.1345 | 0.9899 | 9.5077 | 0.0020 | 23.9110  |
| genus.Eisenbergiella.id.11304 | IschemicStroke      | Weighted median           | 3 | 1.0043 | 0.8594 | 1.1737  | 0.9567 | 0.0021  | 0.1345 | 0.9899 | 9.5077 | 0.0020 | 23.9110  |

|                                             |                     |                           |   |        |        |          |        |         |        |        |        |        |          |
|---------------------------------------------|---------------------|---------------------------|---|--------|--------|----------|--------|---------|--------|--------|--------|--------|----------|
| genus. Eisenbergiella. id. 11304            | IschemicStroke      | Inverse variance weighted | 3 | 1.0044 | 0.8177 | 1.2337   | 0.9665 | 0.0021  | 0.1345 | 0.9899 | 9.5077 | 0.0020 | 23.9110  |
| genus. Eisenbergiella. id. 11304            | IschemicStroke      | Simple mode               | 3 | 0.9921 | 0.7840 | 1.2556   | 0.9536 | 0.0021  | 0.1345 | 0.9899 | 9.5077 | 0.0020 | 23.9110  |
| genus. Eisenbergiella. id. 11304            | IschemicStroke      | Weighted mode             | 3 | 1.0081 | 0.8241 | 1.2331   | 0.9448 | 0.0021  | 0.1345 | 0.9899 | 9.5077 | 0.0020 | 23.9110  |
| genus. Eisenbergiella. id. 11304            | LargeArteryStroke   | MR Egger                  | 3 | 0.5275 | 0.0017 | 166.2901 | 0.8634 | 0.0589  | 0.2792 | 0.8677 | 4.3385 | 0.0373 | 9.0071   |
| genus. Eisenbergiella. id. 11304            | LargeArteryStroke   | Weighted median           | 3 | 0.8970 | 0.5918 | 1.3596   | 0.6084 | 0.0589  | 0.2792 | 0.8677 | 4.3385 | 0.0373 | 9.0071   |
| genus. Eisenbergiella. id. 11304            | LargeArteryStroke   | Inverse variance weighted | 3 | 0.9766 | 0.6341 | 1.5039   | 0.9142 | 0.0589  | 0.2792 | 0.8677 | 4.3385 | 0.0373 | 9.0071   |
| genus. Eisenbergiella. id. 11304            | LargeArteryStroke   | Simple mode               | 3 | 0.8042 | 0.4689 | 1.3793   | 0.5115 | 0.0589  | 0.2792 | 0.8677 | 4.3385 | 0.0373 | 9.0071   |
| genus. Eisenbergiella. id. 11304            | LargeArteryStroke   | Weighted mode             | 3 | 0.8149 | 0.4755 | 1.3968   | 0.5342 | 0.0589  | 0.2792 | 0.8677 | 4.3385 | 0.0373 | 9.0071   |
| genus. Eisenbergiella. id. 11304            | SmallVesselStroke   | MR Egger                  | 3 | 0.3853 | 0.0293 | 5.0695   | 0.6005 | 0.0846  | 0.1252 | 0.6216 | 0.5034 | 0.7775 | 24.0695  |
| genus. Eisenbergiella. id. 11304            | SmallVesselStroke   | Weighted median           | 3 | 0.9644 | 0.6872 | 1.3534   | 0.8340 | 0.0846  | 0.1252 | 0.6216 | 0.5034 | 0.7775 | 24.0695  |
| genus. Eisenbergiella. id. 11304            | SmallVesselStroke   | Inverse variance weighted | 3 | 0.9325 | 0.7125 | 1.2206   | 0.6110 | 0.0846  | 0.1252 | 0.6216 | 0.5034 | 0.7775 | 24.0695  |
| genus. Eisenbergiella. id. 11304            | SmallVesselStroke   | Simple mode               | 3 | 0.9912 | 0.6766 | 1.4522   | 0.9680 | 0.0846  | 0.1252 | 0.6216 | 0.5034 | 0.7775 | 24.0695  |
| genus. Eisenbergiella. id. 11304            | SmallVesselStroke   | Weighted mode             | 3 | 0.9938 | 0.6758 | 1.4614   | 0.9777 | 0.0846  | 0.1252 | 0.6216 | 0.5034 | 0.7775 | 24.0695  |
| genus. Eisenbergiella. id. 11304            | Stroke              | MR Egger                  | 3 | 0.9779 | 0.0719 | 13.2984  | 0.9893 | 0.0045  | 0.1270 | 0.9773 | 9.9662 | 0.0016 | 25.4366  |
| genus. Eisenbergiella. id. 11304            | Stroke              | Weighted median           | 3 | 1.0141 | 0.8770 | 1.1725   | 0.8504 | 0.0045  | 0.1270 | 0.9773 | 9.9662 | 0.0016 | 25.4366  |
| genus. Eisenbergiella. id. 11304            | Stroke              | Inverse variance weighted | 3 | 1.0251 | 0.8442 | 1.2446   | 0.8026 | 0.0045  | 0.1270 | 0.9773 | 9.9662 | 0.0016 | 25.4366  |
| genus. Eisenbergiella. id. 11304            | Stroke              | Simple mode               | 3 | 0.9994 | 0.8058 | 1.2395   | 0.9959 | 0.0045  | 0.1270 | 0.9773 | 9.9662 | 0.0016 | 25.4366  |
| genus. Eisenbergiella. id. 11304            | Stroke              | Weighted mode             | 3 | 1.0058 | 0.8317 | 1.2164   | 0.9578 | 0.0045  | 0.1270 | 0.9773 | 9.9662 | 0.0016 | 25.4366  |
| genus. Enterorhabdus. id. 820               | CardioEmbolicStroke | Inverse variance weighted | 2 | 1.0050 | 0.5940 | 1.7006   | 0.9851 | NA      | NA     | NA     | 2.8413 | 0.0919 | 8.1020   |
| genus. Enterorhabdus. id. 820               | IschemicStroke      | Inverse variance weighted | 2 | 0.9921 | 0.8198 | 1.2006   | 0.9349 | NA      | NA     | NA     | 1.8742 | 0.1710 | 27.6876  |
| genus. Enterorhabdus. id. 820               | LargeArteryStroke   | Inverse variance weighted | 2 | 0.5980 | 0.3951 | 0.9051   | 0.0150 | NA      | NA     | NA     | 0.0135 | 0.9074 | 3.1838   |
| genus. Enterorhabdus. id. 820               | SmallVesselStroke   | Inverse variance weighted | 2 | 0.9115 | 0.6173 | 1.3461   | 0.6414 | NA      | NA     | NA     | 0.3525 | 0.5527 | 16.6750  |
| genus. Enterorhabdus. id. 820               | Stroke              | Inverse variance weighted | 2 | 1.0110 | 0.8876 | 1.1515   | 0.8691 | NA      | NA     | NA     | 0.3471 | 0.5558 | 73.9027  |
| genus. ErysipelotrichaceaeUCG003. id. 11384 | CardioEmbolicStroke | MR Egger                  | 3 | 1.5061 | 0.3646 | 6.2213   | 0.6722 | -0.0544 | 0.0652 | 0.5570 | 1.2842 | 0.2571 | 11.9257  |
| genus. ErysipelotrichaceaeUCG003. id. 11384 | CardioEmbolicStroke | Weighted median           | 3 | 0.8818 | 0.5776 | 1.3463   | 0.5602 | -0.0544 | 0.0652 | 0.5570 | 1.2842 | 0.2571 | 11.9257  |
| genus. ErysipelotrichaceaeUCG003. id. 11384 | CardioEmbolicStroke | Inverse variance weighted | 3 | 0.8399 | 0.5999 | 1.1759   | 0.3096 | -0.0544 | 0.0652 | 0.5570 | 1.2842 | 0.2571 | 11.9257  |
| genus. ErysipelotrichaceaeUCG003. id. 11384 | CardioEmbolicStroke | Simple mode               | 3 | 0.9255 | 0.5411 | 1.5832   | 0.8041 | -0.0544 | 0.0652 | 0.5570 | 1.2842 | 0.2571 | 11.9257  |
| genus. ErysipelotrichaceaeUCG003. id. 11384 | CardioEmbolicStroke | Weighted mode             | 3 | 0.9391 | 0.5576 | 1.5816   | 0.8353 | -0.0544 | 0.0652 | 0.5570 | 1.2842 | 0.2571 | 11.9257  |
| genus. ErysipelotrichaceaeUCG003. id. 11384 | IschemicStroke      | MR Egger                  | 3 | 0.8143 | 0.4723 | 1.4039   | 0.5947 | 0.0110  | 0.0250 | 0.7356 | 0.0163 | 0.8983 | 32.1778  |
| genus. ErysipelotrichaceaeUCG003. id. 11384 | IschemicStroke      | Weighted median           | 3 | 0.9378 | 0.7913 | 1.1114   | 0.4588 | 0.0110  | 0.0250 | 0.7356 | 0.0163 | 0.8983 | 32.1778  |
| genus. ErysipelotrichaceaeUCG003. id. 11384 | IschemicStroke      | Inverse variance weighted | 3 | 0.9166 | 0.7969 | 1.0543   | 0.2228 | 0.0110  | 0.0250 | 0.7356 | 0.0163 | 0.8983 | 32.1778  |
| genus. ErysipelotrichaceaeUCG003. id. 11384 | IschemicStroke      | Simple mode               | 3 | 0.9385 | 0.7667 | 1.1489   | 0.6012 | 0.0110  | 0.0250 | 0.7356 | 0.0163 | 0.8983 | 32.1778  |
| genus. ErysipelotrichaceaeUCG003. id. 11384 | IschemicStroke      | Weighted mode             | 3 | 0.9385 | 0.7784 | 1.1316   | 0.5746 | 0.0110  | 0.0250 | 0.7356 | 0.0163 | 0.8983 | 32.1778  |
| genus. ErysipelotrichaceaeUCG003. id. 11384 | LargeArteryStroke   | MR Egger                  | 3 | 1.5934 | 0.2459 | 10.3255  | 0.7107 | -0.0842 | 0.0834 | 0.4969 | 1.0274 | 0.5983 | 6.3001   |
| genus. ErysipelotrichaceaeUCG003. id. 11384 | LargeArteryStroke   | Weighted median           | 3 | 0.5986 | 0.3355 | 1.0683   | 0.0825 | -0.0842 | 0.0834 | 0.4969 | 1.0274 | 0.5983 | 6.3001   |
| genus. ErysipelotrichaceaeUCG003. id. 11384 | LargeArteryStroke   | Inverse variance weighted | 3 | 0.6256 | 0.4006 | 0.9769   | 0.0391 | -0.0842 | 0.0834 | 0.4969 | 1.0274 | 0.5983 | 6.3001   |
| genus. ErysipelotrichaceaeUCG003. id. 11384 | LargeArteryStroke   | Simple mode               | 3 | 0.5678 | 0.2775 | 1.1620   | 0.2615 | -0.0842 | 0.0834 | 0.4969 | 1.0274 | 0.5983 | 6.3001   |
| genus. ErysipelotrichaceaeUCG003. id. 11384 | LargeArteryStroke   | Weighted mode             | 3 | 0.5678 | 0.2889 | 1.1160   | 0.2423 | -0.0842 | 0.0834 | 0.4969 | 1.0274 | 0.5983 | 6.3001   |
| genus. ErysipelotrichaceaeUCG003. id. 11384 | SmallVesselStroke   | MR Egger                  | 3 | 3.3478 | 0.6849 | 16.3640  | 0.3758 | -0.1036 | 0.0726 | 0.3891 | 2.5130 | 0.2846 | 4.9113   |
| genus. ErysipelotrichaceaeUCG003. id. 11384 | SmallVesselStroke   | Weighted median           | 3 | 0.9340 | 0.5387 | 1.6191   | 0.8077 | -0.1036 | 0.0726 | 0.3891 | 2.5130 | 0.2846 | 4.9113   |
| genus. ErysipelotrichaceaeUCG003. id. 11384 | SmallVesselStroke   | Inverse variance weighted | 3 | 1.0957 | 0.6949 | 1.7277   | 0.6941 | -0.1036 | 0.0726 | 0.3891 | 2.5130 | 0.2846 | 4.9113   |
| genus. ErysipelotrichaceaeUCG003. id. 11384 | SmallVesselStroke   | Simple mode               | 3 | 0.8721 | 0.4561 | 1.6675   | 0.7191 | -0.1036 | 0.0726 | 0.3891 | 2.5130 | 0.2846 | 4.9113   |
| genus. ErysipelotrichaceaeUCG003. id. 11384 | SmallVesselStroke   | Weighted mode             | 3 | 0.8692 | 0.4554 | 1.6588   | 0.7121 | -0.1036 | 0.0726 | 0.3891 | 2.5130 | 0.2846 | 4.9113   |
| genus. ErysipelotrichaceaeUCG003. id. 11384 | Stroke              | MR Egger                  | 3 | 1.0189 | 0.6152 | 1.6875   | 0.9537 | -0.0111 | 0.0232 | 0.7157 | 0.5934 | 0.4411 | 39.3799  |
| genus. ErysipelotrichaceaeUCG003. id. 11384 | Stroke              | Weighted median           | 3 | 0.9254 | 0.7849 | 1.0910   | 0.3559 | -0.0111 | 0.0232 | 0.7157 | 0.5934 | 0.4411 | 39.3799  |
| genus. ErysipelotrichaceaeUCG003. id. 11384 | Stroke              | Inverse variance weighted | 3 | 0.9045 | 0.7947 | 1.0294   | 0.1283 | -0.0111 | 0.0232 | 0.7157 | 0.5934 | 0.4411 | 39.3799  |
| genus. ErysipelotrichaceaeUCG003. id. 11384 | Stroke              | Simple mode               | 3 | 0.9408 | 0.7783 | 1.1372   | 0.5925 | -0.0111 | 0.0232 | 0.7157 | 0.5934 | 0.4411 | 39.3799  |
| genus. ErysipelotrichaceaeUCG003. id. 11384 | Stroke              | Weighted mode             | 3 | 0.9422 | 0.7856 | 1.1302   | 0.5870 | -0.0111 | 0.0232 | 0.7157 | 0.5934 | 0.4411 | 39.3799  |
| genus. Faecalibacterium. id. 2057           | CardioEmbolicStroke | Inverse variance weighted | 2 | 1.2532 | 0.8268 | 1.8996   | 0.2875 | NA      | NA     | NA     | 0.0273 | 0.8687 | 11.1072  |
| genus. Faecalibacterium. id. 2057           | IschemicStroke      | Inverse variance weighted | 2 | 0.9881 | 0.8276 | 1.1798   | 0.8949 | NA      | NA     | NA     | 0.1297 | 0.7188 | 129.6668 |
| genus. Faecalibacterium. id. 2057           | LargeArteryStroke   | Inverse variance weighted | 2 | 1.8144 | 0.8094 | 4.0670   | 0.1480 | NA      | NA     | NA     | 2.1103 | 0.1463 | 3.2991   |
| genus. Faecalibacterium. id. 2057           | SmallVesselStroke   | Inverse variance weighted | 2 | 1.1295 | 0.6380 | 1.9999   | 0.6760 | NA      | NA     | NA     | 1.2014 | 0.2730 | 9.9910   |
| genus. Faecalibacterium. id. 2057           | Stroke              | Inverse variance weighted | 2 | 0.9724 | 0.8244 | 1.1471   | 0.7401 | NA      | NA     | NA     | 0.0451 | 0.8319 | 96.9860  |
| genus. FamilyXIIIAD3011group. id. 11293     | CardioEmbolicStroke | MR Egger                  | 3 | 0.7935 | 0.2275 | 2.7674   | 0.7784 | 0.0389  | 0.0521 | 0.5918 | 0.2285 | 0.6327 | 14.5962  |

|                                      |                     |                           |   |        |        |         |        |         |        |        |        |        |         |
|--------------------------------------|---------------------|---------------------------|---|--------|--------|---------|--------|---------|--------|--------|--------|--------|---------|
| genus.FamilyXIIHAD301lgroup.id.11293 | CardioEmbolicStroke | Weighted median           | 3 | 1.3711 | 0.8883 | 2.1162  | 0.1541 | 0.0389  | 0.0521 | 0.5918 | 0.2285 | 0.6327 | 14.5962 |
| genus.FamilyXIIHAD301lgroup.id.11293 | CardioEmbolicStroke | Inverse variance weighted | 3 | 1.2541 | 0.8923 | 1.7624  | 0.1923 | 0.0389  | 0.0521 | 0.5918 | 0.2285 | 0.6327 | 14.5962 |
| genus.FamilyXIIHAD301lgroup.id.11293 | CardioEmbolicStroke | Simple mode               | 3 | 1.3832 | 0.8582 | 2.2294  | 0.3144 | 0.0389  | 0.0521 | 0.5918 | 0.2285 | 0.6327 | 14.5962 |
| genus.FamilyXIIHAD301lgroup.id.11293 | CardioEmbolicStroke | Weighted mode             | 3 | 1.3832 | 0.8583 | 2.2290  | 0.3142 | 0.0389  | 0.0521 | 0.5918 | 0.2285 | 0.6327 | 14.5962 |
| genus.FamilyXIIHAD301lgroup.id.11293 | IschemicStroke      | MR Egger                  | 3 | 0.7802 | 0.4168 | 1.4604  | 0.5799 | 0.0257  | 0.0271 | 0.5169 | 1.5789 | 0.2089 | 24.8167 |
| genus.FamilyXIIHAD301lgroup.id.11293 | IschemicStroke      | Weighted median           | 3 | 1.0852 | 0.8874 | 1.3272  | 0.4257 | 0.0257  | 0.0271 | 0.5169 | 1.5789 | 0.2089 | 24.8167 |
| genus.FamilyXIIHAD301lgroup.id.11293 | IschemicStroke      | Inverse variance weighted | 3 | 1.0432 | 0.8754 | 1.2432  | 0.6363 | 0.0257  | 0.0271 | 0.5169 | 1.5789 | 0.2089 | 24.8167 |
| genus.FamilyXIIHAD301lgroup.id.11293 | IschemicStroke      | Simple mode               | 3 | 1.1431 | 0.8864 | 1.4740  | 0.4110 | 0.0257  | 0.0271 | 0.5169 | 1.5789 | 0.2089 | 24.8167 |
| genus.FamilyXIIHAD301lgroup.id.11293 | IschemicStroke      | Weighted mode             | 3 | 1.1413 | 0.8872 | 1.4683  | 0.4118 | 0.0257  | 0.0271 | 0.5169 | 1.5789 | 0.2089 | 24.8167 |
| genus.FamilyXIIHAD301lgroup.id.11293 | LargeArteryStroke   | MR Egger                  | 3 | 0.6648 | 0.0220 | 20.1123 | 0.8532 | 0.0342  | 0.1419 | 0.8497 | 4.1520 | 0.0416 | 3.2472  |
| genus.FamilyXIIHAD301lgroup.id.11293 | LargeArteryStroke   | Weighted median           | 3 | 0.9109 | 0.4699 | 1.7658  | 0.7823 | 0.0342  | 0.1419 | 0.8497 | 4.1520 | 0.0416 | 3.2472  |
| genus.FamilyXIIHAD301lgroup.id.11293 | LargeArteryStroke   | Inverse variance weighted | 3 | 0.9944 | 0.5045 | 1.9600  | 0.9870 | 0.0342  | 0.1419 | 0.8497 | 4.1520 | 0.0416 | 3.2472  |
| genus.FamilyXIIHAD301lgroup.id.11293 | LargeArteryStroke   | Simple mode               | 3 | 0.7593 | 0.3243 | 1.7775  | 0.5906 | 0.0342  | 0.1419 | 0.8497 | 4.1520 | 0.0416 | 3.2472  |
| genus.FamilyXIIHAD301lgroup.id.11293 | LargeArteryStroke   | Weighted mode             | 3 | 0.8067 | 0.3470 | 1.8751  | 0.6671 | 0.0342  | 0.1419 | 0.8497 | 4.1520 | 0.0416 | 3.2472  |
| genus.FamilyXIIHAD301lgroup.id.11293 | SmallVesselStroke   | MR Egger                  | 3 | 0.7420 | 0.1629 | 3.3803  | 0.7657 | 0.0201  | 0.0637 | 0.8053 | 0.6053 | 0.4366 | 11.7869 |
| genus.FamilyXIIHAD301lgroup.id.11293 | SmallVesselStroke   | Weighted median           | 3 | 0.9384 | 0.5653 | 1.5576  | 0.8057 | 0.0201  | 0.0637 | 0.8053 | 0.6053 | 0.4366 | 11.7869 |
| genus.FamilyXIIHAD301lgroup.id.11293 | SmallVesselStroke   | Inverse variance weighted | 3 | 0.9384 | 0.6177 | 1.4257  | 0.7657 | 0.0201  | 0.0637 | 0.8053 | 0.6053 | 0.4366 | 11.7869 |
| genus.FamilyXIIHAD301lgroup.id.11293 | SmallVesselStroke   | Simple mode               | 3 | 0.9066 | 0.4949 | 1.6608  | 0.7809 | 0.0201  | 0.0637 | 0.8053 | 0.6053 | 0.4366 | 11.7869 |
| genus.FamilyXIIHAD301lgroup.id.11293 | SmallVesselStroke   | Weighted mode             | 3 | 0.9371 | 0.4958 | 1.7714  | 0.8601 | 0.0201  | 0.0637 | 0.8053 | 0.6053 | 0.4366 | 11.7869 |
| genus.FamilyXIIHAD301lgroup.id.11293 | Stroke              | MR Egger                  | 3 | 0.8148 | 0.5144 | 1.2907  | 0.5432 | 0.0204  | 0.0199 | 0.4921 | 1.5277 | 0.4659 | 41.7014 |
| genus.FamilyXIIHAD301lgroup.id.11293 | Stroke              | Weighted median           | 3 | 1.0792 | 0.9130 | 1.2755  | 0.3716 | 0.0204  | 0.0199 | 0.4921 | 1.5277 | 0.4659 | 41.7014 |
| genus.FamilyXIIHAD301lgroup.id.11293 | Stroke              | Inverse variance weighted | 3 | 1.0259 | 0.8989 | 1.1709  | 0.7041 | 0.0204  | 0.0199 | 0.4921 | 1.5277 | 0.4659 | 41.7014 |
| genus.FamilyXIIHAD301lgroup.id.11293 | Stroke              | Simple mode               | 3 | 1.0924 | 0.8926 | 1.3370  | 0.4814 | 0.0204  | 0.0199 | 0.4921 | 1.5277 | 0.4659 | 41.7014 |
| genus.FamilyXIIHAD301lgroup.id.11293 | Stroke              | Weighted mode             | 3 | 1.0924 | 0.8827 | 1.3520  | 0.5017 | 0.0204  | 0.0199 | 0.4921 | 1.5277 | 0.4659 | 41.7014 |
| genus.Fusicatzenibacter.id.11305     | CardioEmbolicStroke | MR Egger                  | 5 | 0.9180 | 0.3900 | 2.1607  | 0.8572 | 0.0005  | 0.0344 | 0.9904 | 0.1776 | 0.9811 | 40.9823 |
| genus.Fusicatzenibacter.id.11305     | CardioEmbolicStroke | Weighted median           | 5 | 0.9084 | 0.6377 | 1.2940  | 0.5945 | 0.0005  | 0.0344 | 0.9904 | 0.1776 | 0.9811 | 40.9823 |
| genus.Fusicatzenibacter.id.11305     | CardioEmbolicStroke | Inverse variance weighted | 5 | 0.9229 | 0.6874 | 1.2393  | 0.5939 | 0.0005  | 0.0344 | 0.9904 | 0.1776 | 0.9811 | 40.9823 |
| genus.Fusicatzenibacter.id.11305     | CardioEmbolicStroke | Simple mode               | 5 | 0.8933 | 0.5677 | 1.4055  | 0.6511 | 0.0005  | 0.0344 | 0.9904 | 0.1776 | 0.9811 | 40.9823 |
| genus.Fusicatzenibacter.id.11305     | CardioEmbolicStroke | Weighted mode             | 5 | 0.8870 | 0.5768 | 1.3641  | 0.6141 | 0.0005  | 0.0344 | 0.9904 | 0.1776 | 0.9811 | 40.9823 |
| genus.Fusicatzenibacter.id.11305     | IschemicStroke      | MR Egger                  | 5 | 0.9431 | 0.6564 | 1.3551  | 0.7723 | -0.0058 | 0.0147 | 0.7178 | 1.3673 | 0.7132 | 29.7053 |
| genus.Fusicatzenibacter.id.11305     | IschemicStroke      | Weighted median           | 5 | 0.8704 | 0.7475 | 1.0135  | 0.0739 | -0.0058 | 0.0147 | 0.7178 | 1.3673 | 0.7132 | 29.7053 |
| genus.Fusicatzenibacter.id.11305     | IschemicStroke      | Inverse variance weighted | 5 | 0.8802 | 0.7775 | 0.9965  | 0.0439 | -0.0058 | 0.0147 | 0.7178 | 1.3673 | 0.7132 | 29.7053 |
| genus.Fusicatzenibacter.id.11305     | IschemicStroke      | Simple mode               | 5 | 0.8694 | 0.7102 | 1.0642  | 0.2464 | -0.0058 | 0.0147 | 0.7178 | 1.3673 | 0.7132 | 29.7053 |
| genus.Fusicatzenibacter.id.11305     | IschemicStroke      | Weighted mode             | 5 | 0.8674 | 0.7131 | 1.0552  | 0.2280 | -0.0058 | 0.0147 | 0.7178 | 1.3673 | 0.7132 | 29.7053 |
| genus.Fusicatzenibacter.id.11305     | LargeArteryStroke   | MR Egger                  | 4 | 0.6341 | 0.0345 | 11.6575 | 0.7881 | 0.0421  | 0.1001 | 0.7150 | 3.9600 | 0.1381 | 2.2943  |
| genus.Fusicatzenibacter.id.11305     | LargeArteryStroke   | Weighted median           | 4 | 1.3560 | 0.7265 | 2.5312  | 0.3389 | 0.0421  | 0.1001 | 0.7150 | 3.9600 | 0.1381 | 2.2943  |
| genus.Fusicatzenibacter.id.11305     | LargeArteryStroke   | Inverse variance weighted | 4 | 1.1627 | 0.6419 | 2.1062  | 0.6189 | 0.0421  | 0.1001 | 0.7150 | 3.9600 | 0.1381 | 2.2943  |
| genus.Fusicatzenibacter.id.11305     | LargeArteryStroke   | Simple mode               | 4 | 1.5812 | 0.6966 | 3.5891  | 0.3534 | 0.0421  | 0.1001 | 0.7150 | 3.9600 | 0.1381 | 2.2943  |
| genus.Fusicatzenibacter.id.11305     | LargeArteryStroke   | Weighted mode             | 4 | 1.4949 | 0.7053 | 3.1685  | 0.3712 | 0.0421  | 0.1001 | 0.7150 | 3.9600 | 0.1381 | 2.2943  |
| genus.Fusicatzenibacter.id.11305     | SmallVesselStroke   | MR Egger                  | 5 | 0.7109 | 0.2407 | 2.0992  | 0.5805 | -0.0149 | 0.0428 | 0.7504 | 0.5257 | 0.9132 | 4.2881  |
| genus.Fusicatzenibacter.id.11305     | SmallVesselStroke   | Weighted median           | 5 | 0.6132 | 0.3862 | 0.9738  | 0.0382 | -0.0149 | 0.0428 | 0.7504 | 0.5257 | 0.9132 | 4.2881  |
| genus.Fusicatzenibacter.id.11305     | SmallVesselStroke   | Inverse variance weighted | 5 | 0.5931 | 0.4100 | 0.8580  | 0.0056 | -0.0149 | 0.0428 | 0.7504 | 0.5257 | 0.9132 | 4.2881  |
| genus.Fusicatzenibacter.id.11305     | SmallVesselStroke   | Simple mode               | 5 | 0.6547 | 0.3472 | 1.2345  | 0.2606 | -0.0149 | 0.0428 | 0.7504 | 0.5257 | 0.9132 | 4.2881  |
| genus.Fusicatzenibacter.id.11305     | SmallVesselStroke   | Weighted mode             | 5 | 0.6689 | 0.3915 | 1.1429  | 0.2152 | -0.0149 | 0.0428 | 0.7504 | 0.5257 | 0.9132 | 4.2881  |
| genus.Fusicatzenibacter.id.11305     | Stroke              | MR Egger                  | 5 | 0.9350 | 0.6695 | 1.3059  | 0.7199 | -0.0061 | 0.0135 | 0.6811 | 1.4272 | 0.6992 | 26.5049 |
| genus.Fusicatzenibacter.id.11305     | Stroke              | Weighted median           | 5 | 0.8502 | 0.7347 | 0.9838  | 0.0293 | -0.0061 | 0.0135 | 0.6811 | 1.4272 | 0.6992 | 26.5049 |
| genus.Fusicatzenibacter.id.11305     | Stroke              | Inverse variance weighted | 5 | 0.8696 | 0.7753 | 0.9753  | 0.0170 | -0.0061 | 0.0135 | 0.6811 | 1.4272 | 0.6992 | 26.5049 |
| genus.Fusicatzenibacter.id.11305     | Stroke              | Simple mode               | 5 | 0.8309 | 0.6802 | 1.0150  | 0.1438 | -0.0061 | 0.0135 | 0.6811 | 1.4272 | 0.6992 | 26.5049 |
| genus.Fusicatzenibacter.id.11305     | Stroke              | Weighted mode             | 5 | 0.8352 | 0.6807 | 1.0247  | 0.1593 | -0.0061 | 0.0135 | 0.6811 | 1.4272 | 0.6992 | 26.5049 |
| genus.Haemophilus.id.3698            | CardioEmbolicStroke | MR Egger                  | 4 | 1.7232 | 1.0360 | 2.8663  | 0.1710 | -0.0519 | 0.0321 | 0.2471 | 2.9059 | 0.4064 | 15.3762 |
| genus.Haemophilus.id.3698            | CardioEmbolicStroke | Weighted median           | 4 | 1.1877 | 0.9105 | 1.5493  | 0.2047 | -0.0519 | 0.0321 | 0.2471 | 2.9059 | 0.4064 | 15.3762 |
| genus.Haemophilus.id.3698            | CardioEmbolicStroke | Inverse variance weighted | 4 | 1.1684 | 0.9630 | 1.4178  | 0.1147 | -0.0519 | 0.0321 | 0.2471 | 2.9059 | 0.4064 | 15.3762 |
| genus.Haemophilus.id.3698            | CardioEmbolicStroke | Simple mode               | 4 | 1.1787 | 0.8181 | 1.6982  | 0.4426 | -0.0519 | 0.0321 | 0.2471 | 2.9059 | 0.4064 | 15.3762 |
| genus.Haemophilus.id.3698            | CardioEmbolicStroke | Weighted mode             | 4 | 1.2745 | 0.9227 | 1.7603  | 0.2375 | -0.0519 | 0.0321 | 0.2471 | 2.9059 | 0.4064 | 15.3762 |

|                                   |                     |                           |   |        |        |        |        |         |        |        |        |        |          |
|-----------------------------------|---------------------|---------------------------|---|--------|--------|--------|--------|---------|--------|--------|--------|--------|----------|
| genus. Haemophilus. id. 3698      | IschemicStroke      | MR Egger                  | 4 | 0.9411 | 0.7572 | 1.1696 | 0.6390 | 0.0071  | 0.0139 | 0.6625 | 0.7868 | 0.6748 | 186.2660 |
| genus. Haemophilus. id. 3698      | IschemicStroke      | Weighted median           | 4 | 0.9773 | 0.8811 | 1.0839 | 0.6637 | 0.0071  | 0.0139 | 0.6625 | 0.7868 | 0.6748 | 186.2660 |
| genus. Haemophilus. id. 3698      | IschemicStroke      | Inverse variance weighted | 4 | 0.9911 | 0.9102 | 1.0791 | 0.8363 | 0.0071  | 0.0139 | 0.6625 | 0.7868 | 0.6748 | 186.2660 |
| genus. Haemophilus. id. 3698      | IschemicStroke      | Simple mode               | 4 | 0.9714 | 0.8490 | 1.1115 | 0.7015 | 0.0071  | 0.0139 | 0.6625 | 0.7868 | 0.6748 | 186.2660 |
| genus. Haemophilus. id. 3698      | IschemicStroke      | Weighted mode             | 4 | 0.9719 | 0.8625 | 1.0952 | 0.6723 | 0.0071  | 0.0139 | 0.6625 | 0.7868 | 0.6748 | 186.2660 |
| genus. Haemophilus. id. 3698      | LargeArteryStroke   | MR Egger                  | 4 | 0.7626 | 0.3827 | 1.5199 | 0.5217 | 0.0231  | 0.0433 | 0.6474 | 1.5792 | 0.4540 | 24.9543  |
| genus. Haemophilus. id. 3698      | LargeArteryStroke   | Weighted median           | 4 | 0.9062 | 0.6508 | 1.2620 | 0.5601 | 0.0231  | 0.0433 | 0.6474 | 1.5792 | 0.4540 | 24.9543  |
| genus. Haemophilus. id. 3698      | LargeArteryStroke   | Inverse variance weighted | 4 | 0.9069 | 0.6969 | 1.1802 | 0.4672 | 0.0231  | 0.0433 | 0.6474 | 1.5792 | 0.4540 | 24.9543  |
| genus. Haemophilus. id. 3698      | LargeArteryStroke   | Simple mode               | 4 | 1.0365 | 0.6463 | 1.6623 | 0.8913 | 0.0231  | 0.0433 | 0.6474 | 1.5792 | 0.4540 | 24.9543  |
| genus. Haemophilus. id. 3698      | LargeArteryStroke   | Weighted mode             | 4 | 0.8367 | 0.5567 | 1.2577 | 0.4544 | 0.0231  | 0.0433 | 0.6474 | 1.5792 | 0.4540 | 24.9543  |
| genus. Haemophilus. id. 3698      | SmallVesselStroke   | MR Egger                  | 4 | 1.3503 | 0.7053 | 2.5852 | 0.4605 | -0.0283 | 0.0407 | 0.5588 | 1.7822 | 0.4102 | 22.6288  |
| genus. Haemophilus. id. 3698      | SmallVesselStroke   | Weighted median           | 4 | 1.2450 | 0.9208 | 1.6834 | 0.1546 | -0.0283 | 0.0407 | 0.5588 | 1.7822 | 0.4102 | 22.6288  |
| genus. Haemophilus. id. 3698      | SmallVesselStroke   | Inverse variance weighted | 4 | 1.0911 | 0.8526 | 1.3963 | 0.4885 | -0.0283 | 0.0407 | 0.5588 | 1.7822 | 0.4102 | 22.6288  |
| genus. Haemophilus. id. 3698      | SmallVesselStroke   | Simple mode               | 4 | 1.2072 | 0.7847 | 1.8571 | 0.4545 | -0.0283 | 0.0407 | 0.5588 | 1.7822 | 0.4102 | 22.6288  |
| genus. Haemophilus. id. 3698      | SmallVesselStroke   | Weighted mode             | 4 | 1.2301 | 0.8327 | 1.8171 | 0.3746 | -0.0283 | 0.0407 | 0.5588 | 1.7822 | 0.4102 | 22.6288  |
| genus. Haemophilus. id. 3698      | Stroke              | MR Egger                  | 4 | 1.0212 | 0.8353 | 1.2484 | 0.8567 | -0.0072 | 0.0129 | 0.6316 | 0.3900 | 0.8229 | 181.3286 |
| genus. Haemophilus. id. 3698      | Stroke              | Weighted median           | 4 | 0.9765 | 0.8882 | 1.0736 | 0.6231 | -0.0072 | 0.0129 | 0.6316 | 0.3900 | 0.8229 | 181.3286 |
| genus. Haemophilus. id. 3698      | Stroke              | Inverse variance weighted | 4 | 0.9686 | 0.8954 | 1.0478 | 0.4263 | -0.0072 | 0.0129 | 0.6316 | 0.3900 | 0.8229 | 181.3286 |
| genus. Haemophilus. id. 3698      | Stroke              | Simple mode               | 4 | 0.9732 | 0.8557 | 1.1069 | 0.7069 | -0.0072 | 0.0129 | 0.6316 | 0.3900 | 0.8229 | 181.3286 |
| genus. Haemophilus. id. 3698      | Stroke              | Weighted mode             | 4 | 0.9845 | 0.8874 | 1.0922 | 0.7871 | -0.0072 | 0.0129 | 0.6316 | 0.3900 | 0.8229 | 181.3286 |
| genus. Howardella. id. 2000       | CardioEmbolicStroke | MR Egger                  | 3 | 0.6631 | 0.2614 | 1.6817 | 0.5459 | 0.0425  | 0.0758 | 0.6746 | 1.2369 | 0.2661 | 24.7673  |
| genus. Howardella. id. 2000       | CardioEmbolicStroke | Weighted median           | 3 | 0.8545 | 0.6850 | 1.0659 | 0.1632 | 0.0425  | 0.0758 | 0.6746 | 1.2369 | 0.2661 | 24.7673  |
| genus. Howardella. id. 2000       | CardioEmbolicStroke | Inverse variance weighted | 3 | 0.8604 | 0.7232 | 1.0236 | 0.0898 | 0.0425  | 0.0758 | 0.6746 | 1.2369 | 0.2661 | 24.7673  |
| genus. Howardella. id. 2000       | CardioEmbolicStroke | Simple mode               | 3 | 0.8117 | 0.6111 | 1.0781 | 0.2864 | 0.0425  | 0.0758 | 0.6746 | 1.2369 | 0.2661 | 24.7673  |
| genus. Howardella. id. 2000       | CardioEmbolicStroke | Weighted mode             | 3 | 0.8256 | 0.6276 | 1.0861 | 0.3043 | 0.0425  | 0.0758 | 0.6746 | 1.2369 | 0.2661 | 24.7673  |
| genus. Howardella. id. 2000       | IschemicStroke      | MR Egger                  | 3 | 0.7690 | 0.5465 | 1.0820 | 0.3728 | 0.0360  | 0.0286 | 0.4270 | 1.6581 | 0.4365 | 76.8083  |
| genus. Howardella. id. 2000       | IschemicStroke      | Weighted median           | 3 | 0.9498 | 0.8652 | 1.0427 | 0.2792 | 0.0360  | 0.0286 | 0.4270 | 1.6581 | 0.4365 | 76.8083  |
| genus. Howardella. id. 2000       | IschemicStroke      | Inverse variance weighted | 3 | 0.9525 | 0.8823 | 1.0283 | 0.2128 | 0.0360  | 0.0286 | 0.4270 | 1.6581 | 0.4365 | 76.8083  |
| genus. Howardella. id. 2000       | IschemicStroke      | Simple mode               | 3 | 0.9435 | 0.8359 | 1.0649 | 0.4458 | 0.0360  | 0.0286 | 0.4270 | 1.6581 | 0.4365 | 76.8083  |
| genus. Howardella. id. 2000       | IschemicStroke      | Weighted mode             | 3 | 0.9292 | 0.8160 | 1.0582 | 0.3837 | 0.0360  | 0.0286 | 0.4270 | 1.6581 | 0.4365 | 76.8083  |
| genus. Howardella. id. 2000       | LargeArteryStroke   | MR Egger                  | 3 | 0.2694 | 0.0572 | 1.2680 | 0.3452 | 0.2114  | 0.1255 | 0.3410 | 6.9339 | 0.0312 | 13.0438  |
| genus. Howardella. id. 2000       | LargeArteryStroke   | Weighted median           | 3 | 0.8379 | 0.5833 | 1.2035 | 0.3383 | 0.2114  | 0.1255 | 0.3410 | 6.9339 | 0.0312 | 13.0438  |
| genus. Howardella. id. 2000       | LargeArteryStroke   | Inverse variance weighted | 3 | 0.9921 | 0.6402 | 1.5373 | 0.9716 | 0.2114  | 0.1255 | 0.3410 | 6.9339 | 0.0312 | 13.0438  |
| genus. Howardella. id. 2000       | LargeArteryStroke   | Simple mode               | 3 | 0.7854 | 0.5172 | 1.1928 | 0.3748 | 0.2114  | 0.1255 | 0.3410 | 6.9339 | 0.0312 | 13.0438  |
| genus. Howardella. id. 2000       | LargeArteryStroke   | Weighted mode             | 3 | 0.7877 | 0.5269 | 1.1776 | 0.3648 | 0.2114  | 0.1255 | 0.3410 | 6.9339 | 0.0312 | 13.0438  |
| genus. Howardella. id. 2000       | SmallVesselStroke   | MR Egger                  | 3 | 0.4735 | 0.1635 | 1.3713 | 0.3996 | 0.0989  | 0.0862 | 0.4566 | 2.2110 | 0.3310 | 15.0839  |
| genus. Howardella. id. 2000       | SmallVesselStroke   | Weighted median           | 3 | 0.9135 | 0.6769 | 1.2329 | 0.5542 | 0.0989  | 0.0862 | 0.4566 | 2.2110 | 0.3310 | 15.0839  |
| genus. Howardella. id. 2000       | SmallVesselStroke   | Inverse variance weighted | 3 | 0.8702 | 0.6901 | 1.0973 | 0.2400 | 0.0989  | 0.0862 | 0.4566 | 2.2110 | 0.3310 | 15.0839  |
| genus. Howardella. id. 2000       | SmallVesselStroke   | Simple mode               | 3 | 0.9511 | 0.6833 | 1.3238 | 0.7943 | 0.0989  | 0.0862 | 0.4566 | 2.2110 | 0.3310 | 15.0839  |
| genus. Howardella. id. 2000       | SmallVesselStroke   | Weighted mode             | 3 | 0.9462 | 0.6750 | 1.3262 | 0.7786 | 0.0989  | 0.0862 | 0.4566 | 2.2110 | 0.3310 | 15.0839  |
| genus. Howardella. id. 2000       | Stroke              | MR Egger                  | 3 | 0.7877 | 0.5731 | 1.0826 | 0.3801 | 0.0319  | 0.0266 | 0.4418 | 1.4528 | 0.4837 | 81.8365  |
| genus. Howardella. id. 2000       | Stroke              | Weighted median           | 3 | 0.9598 | 0.8764 | 1.0512 | 0.3770 | 0.0319  | 0.0266 | 0.4418 | 1.4528 | 0.4837 | 81.8365  |
| genus. Howardella. id. 2000       | Stroke              | Inverse variance weighted | 3 | 0.9527 | 0.8876 | 1.0225 | 0.1793 | 0.0319  | 0.0266 | 0.4418 | 1.4528 | 0.4837 | 81.8365  |
| genus. Howardella. id. 2000       | Stroke              | Simple mode               | 3 | 0.9728 | 0.8639 | 1.0955 | 0.6940 | 0.0319  | 0.0266 | 0.4418 | 1.4528 | 0.4837 | 81.8365  |
| genus. Howardella. id. 2000       | Stroke              | Weighted mode             | 3 | 0.9765 | 0.8716 | 1.0939 | 0.7211 | 0.0319  | 0.0266 | 0.4418 | 1.4528 | 0.4837 | 81.8365  |
| genus. Hungatella. id. 11306      | CardioEmbolicStroke | Inverse variance weighted | 2 | 1.1240 | 0.7494 | 1.6860 | 0.5719 | NA      | NA     | NA     | 2.9433 | 0.0862 | 11.4785  |
| genus. Hungatella. id. 11306      | IschemicStroke      | Inverse variance weighted | 2 | 1.0826 | 0.9821 | 1.1934 | 0.1104 | NA      | NA     | NA     | 0.4222 | 0.5158 | 47.6198  |
| genus. Hungatella. id. 11306      | LargeArteryStroke   | Inverse variance weighted | 2 | 0.9615 | 0.6897 | 1.3405 | 0.8169 | NA      | NA     | NA     | 0.0062 | 0.9372 | 104.7216 |
| genus. Hungatella. id. 11306      | SmallVesselStroke   | Inverse variance weighted | 2 | 0.9120 | 0.6820 | 1.2195 | 0.5343 | NA      | NA     | NA     | 0.0013 | 0.9718 | 43.2455  |
| genus. Hungatella. id. 11306      | Stroke              | Inverse variance weighted | 2 | 1.0760 | 0.9833 | 1.1773 | 0.1111 | NA      | NA     | NA     | 0.0959 | 0.7568 | 55.4121  |
| genus. Intestinibacter. id. 11345 | CardioEmbolicStroke | Inverse variance weighted | 2 | 0.9033 | 0.6134 | 1.3303 | 0.6066 | NA      | NA     | NA     | 0.1972 | 0.6570 | 28.8398  |
| genus. Intestinibacter. id. 11345 | IschemicStroke      | Inverse variance weighted | 2 | 0.9575 | 0.8151 | 1.1247 | 0.5968 | NA      | NA     | NA     | 0.0601 | 0.8063 | 87.5789  |
| genus. Intestinibacter. id. 11345 | LargeArteryStroke   | Inverse variance weighted | 2 | 0.9409 | 0.5619 | 1.5755 | 0.8169 | NA      | NA     | NA     | 0.2106 | 0.6463 | 27.7308  |
| genus. Intestinibacter. id. 11345 | SmallVesselStroke   | Inverse variance weighted | 2 | 1.0251 | 0.6280 | 1.6733 | 0.9210 | NA      | NA     | NA     | 0.2505 | 0.6167 | 25.4147  |

|                                              |                     |                           |   |        |        |         |        |         |        |        |        |        |         |         |
|----------------------------------------------|---------------------|---------------------------|---|--------|--------|---------|--------|---------|--------|--------|--------|--------|---------|---------|
| genus. Intestinibacter. id. 11345            | Stroke              | Inverse variance weighted | 2 | 0.9700 | 0.8240 | 1.1419  | 0.7145 | NA      | NA     | NA     | 1.1787 | 0.2776 | 44.2961 |         |
| genus. Intestinimonas. id. 2062              | CardioEmbolicStroke | MR Egger                  | 3 | 0.8909 | 0.1236 | 6.4208  | 0.9273 |         | 0.0147 | 0.0798 | 0.8839 | 2.9611 | 0.0853  | 13.0440 |
| genus. Intestinimonas. id. 2062              | CardioEmbolicStroke | Weighted median           | 3 | 0.9231 | 0.6101 | 1.3965  | 0.7048 |         | 0.0147 | 0.0798 | 0.8839 | 2.9611 | 0.0853  | 13.0440 |
| genus. Intestinimonas. id. 2062              | CardioEmbolicStroke | Inverse variance weighted | 3 | 1.0658 | 0.7338 | 1.5481  | 0.7379 |         | 0.0147 | 0.0798 | 0.8839 | 2.9611 | 0.0853  | 13.0440 |
| genus. Intestinimonas. id. 2062              | CardioEmbolicStroke | Simple mode               | 3 | 0.8791 | 0.5424 | 1.4247  | 0.6530 |         | 0.0147 | 0.0798 | 0.8839 | 2.9611 | 0.0853  | 13.0440 |
| genus. Intestinimonas. id. 2062              | CardioEmbolicStroke | Weighted mode             | 3 | 0.8812 | 0.5141 | 1.5105  | 0.6908 |         | 0.0147 | 0.0798 | 0.8839 | 2.9611 | 0.0853  | 13.0440 |
| genus. Intestinimonas. id. 2062              | IschemicStroke      | MR Egger                  | 3 | 0.9885 | 0.6132 | 1.5936  | 0.9699 | -0.0040 | 0.0196 | 0.8729 | 0.1825 | 0.6692 | 62.8816 |         |
| genus. Intestinimonas. id. 2062              | IschemicStroke      | Weighted median           | 3 | 0.9522 | 0.8134 | 1.1146  | 0.5419 | -0.0040 | 0.0196 | 0.8729 | 0.1825 | 0.6692 | 62.8816 |         |
| genus. Intestinimonas. id. 2062              | IschemicStroke      | Inverse variance weighted | 3 | 0.9427 | 0.8276 | 1.0739  | 0.3749 | -0.0040 | 0.0196 | 0.8729 | 0.1825 | 0.6692 | 62.8816 |         |
| genus. Intestinimonas. id. 2062              | IschemicStroke      | Simple mode               | 3 | 0.9616 | 0.8042 | 1.1497  | 0.7092 | -0.0040 | 0.0196 | 0.8729 | 0.1825 | 0.6692 | 62.8816 |         |
| genus. Intestinimonas. id. 2062              | IschemicStroke      | Weighted mode             | 3 | 0.9599 | 0.8077 | 1.1407  | 0.6875 | -0.0040 | 0.0196 | 0.8729 | 0.1825 | 0.6692 | 62.8816 |         |
| genus. Intestinimonas. id. 2062              | LargeArteryStroke   | MR Egger                  | 3 | 5.1531 | 0.9937 | 26.7240 | 0.3013 | -0.1467 | 0.0653 | 0.2667 | 5.0595 | 0.0797 | 3.8090  |         |
| genus. Intestinimonas. id. 2062              | LargeArteryStroke   | Weighted median           | 3 | 0.7086 | 0.3817 | 1.3154  | 0.2750 | -0.1467 | 0.0653 | 0.2667 | 5.0595 | 0.0797 | 3.8090  |         |
| genus. Intestinimonas. id. 2062              | LargeArteryStroke   | Inverse variance weighted | 3 | 0.8309 | 0.4289 | 1.6094  | 0.5828 | -0.1467 | 0.0653 | 0.2667 | 5.0595 | 0.0797 | 3.8090  |         |
| genus. Intestinimonas. id. 2062              | LargeArteryStroke   | Simple mode               | 3 | 0.6168 | 0.2969 | 1.2817  | 0.3247 | -0.1467 | 0.0653 | 0.2667 | 5.0595 | 0.0797 | 3.8090  |         |
| genus. Intestinimonas. id. 2062              | LargeArteryStroke   | Weighted mode             | 3 | 0.6207 | 0.2871 | 1.3417  | 0.3491 | -0.1467 | 0.0653 | 0.2667 | 5.0595 | 0.0797 | 3.8090  |         |
| genus. Intestinimonas. id. 2062              | SmallVesselStroke   | MR Egger                  | 3 | 1.9276 | 0.4333 | 8.5744  | 0.5472 | -0.0305 | 0.0595 | 0.6989 | 0.2388 | 0.6250 | 6.5753  |         |
| genus. Intestinimonas. id. 2062              | SmallVesselStroke   | Weighted median           | 3 | 1.4164 | 0.8838 | 2.2700  | 0.1480 | -0.0305 | 0.0595 | 0.6989 | 0.2388 | 0.6250 | 6.5753  |         |
| genus. Intestinimonas. id. 2062              | SmallVesselStroke   | Inverse variance weighted | 3 | 1.3224 | 0.9042 | 1.9342  | 0.1497 | -0.0305 | 0.0595 | 0.6989 | 0.2388 | 0.6250 | 6.5753  |         |
| genus. Intestinimonas. id. 2062              | SmallVesselStroke   | Simple mode               | 3 | 1.4574 | 0.8535 | 2.4885  | 0.3017 | -0.0305 | 0.0595 | 0.6989 | 0.2388 | 0.6250 | 6.5753  |         |
| genus. Intestinimonas. id. 2062              | SmallVesselStroke   | Weighted mode             | 3 | 1.4574 | 0.8359 | 2.5409  | 0.3155 | -0.0305 | 0.0595 | 0.6989 | 0.2388 | 0.6250 | 6.5753  |         |
| genus. Intestinimonas. id. 2062              | Stroke              | MR Egger                  | 3 | 1.0354 | 0.6641 | 1.6141  | 0.9031 | -0.0076 | 0.0182 | 0.7481 | 0.1583 | 0.6907 | 70.6674 |         |
| genus. Intestinimonas. id. 2062              | Stroke              | Weighted median           | 3 | 0.9656 | 0.8335 | 1.1186  | 0.6409 | -0.0076 | 0.0182 | 0.7481 | 0.1583 | 0.6907 | 70.6674 |         |
| genus. Intestinimonas. id. 2062              | Stroke              | Inverse variance weighted | 3 | 0.9452 | 0.8376 | 1.0667  | 0.3611 | -0.0076 | 0.0182 | 0.7481 | 0.1583 | 0.6907 | 70.6674 |         |
| genus. Intestinimonas. id. 2062              | Stroke              | Simple mode               | 3 | 0.9677 | 0.8253 | 1.1345  | 0.7247 | -0.0076 | 0.0182 | 0.7481 | 0.1583 | 0.6907 | 70.6674 |         |
| genus. Intestinimonas. id. 2062              | Stroke              | Weighted mode             | 3 | 0.9681 | 0.8210 | 1.1415  | 0.7369 | -0.0076 | 0.0182 | 0.7481 | 0.1583 | 0.6907 | 70.6674 |         |
| genus. LachnospiraceaeFCS020group. id. 11314 | CardioEmbolicStroke | MR Egger                  | 4 | 0.8752 | 0.4855 | 1.5777  | 0.7008 | 0.0037  | 0.0217 | 0.8812 | 0.1795 | 0.9142 | 36.9524 |         |
| genus. LachnospiraceaeFCS020group. id. 11314 | CardioEmbolicStroke | Weighted median           | 4 | 0.8912 | 0.6455 | 1.2305  | 0.4840 | 0.0037  | 0.0217 | 0.8812 | 0.1795 | 0.9142 | 36.9524 |         |
| genus. LachnospiraceaeFCS020group. id. 11314 | CardioEmbolicStroke | Inverse variance weighted | 4 | 0.9158 | 0.7019 | 1.1949  | 0.5171 | 0.0037  | 0.0217 | 0.8812 | 0.1795 | 0.9142 | 36.9524 |         |
| genus. LachnospiraceaeFCS020group. id. 11314 | CardioEmbolicStroke | Simple mode               | 4 | 0.8827 | 0.6093 | 1.2786  | 0.5564 | 0.0037  | 0.0217 | 0.8812 | 0.1795 | 0.9142 | 36.9524 |         |
| genus. LachnospiraceaeFCS020group. id. 11314 | CardioEmbolicStroke | Weighted mode             | 4 | 0.8909 | 0.6038 | 1.3143  | 0.6012 | 0.0037  | 0.0217 | 0.8812 | 0.1795 | 0.9142 | 36.9524 |         |
| genus. LachnospiraceaeFCS020group. id. 11314 | IschemicStroke      | MR Egger                  | 4 | 0.8285 | 0.6397 | 1.0730  | 0.2900 | 0.0004  | 0.0096 | 0.9715 | 1.2126 | 0.5454 | 19.0120 |         |
| genus. LachnospiraceaeFCS020group. id. 11314 | IschemicStroke      | Weighted median           | 4 | 0.8211 | 0.7108 | 0.9485  | 0.0074 | 0.0004  | 0.0096 | 0.9715 | 1.2126 | 0.5454 | 19.0120 |         |
| genus. LachnospiraceaeFCS020group. id. 11314 | IschemicStroke      | Inverse variance weighted | 4 | 0.8324 | 0.7402 | 0.9361  | 0.0022 | 0.0004  | 0.0096 | 0.9715 | 1.2126 | 0.5454 | 19.0120 |         |
| genus. LachnospiraceaeFCS020group. id. 11314 | IschemicStroke      | Simple mode               | 4 | 0.7925 | 0.6448 | 0.9740  | 0.1141 | 0.0004  | 0.0096 | 0.9715 | 1.2126 | 0.5454 | 19.0120 |         |
| genus. LachnospiraceaeFCS020group. id. 11314 | IschemicStroke      | Weighted mode             | 4 | 0.8150 | 0.6830 | 0.9725  | 0.1080 | 0.0004  | 0.0096 | 0.9715 | 1.2126 | 0.5454 | 19.0120 |         |
| genus. LachnospiraceaeFCS020group. id. 11314 | LargeArteryStroke   | MR Egger                  | 4 | 0.7186 | 0.3303 | 1.5633  | 0.4924 | -0.0015 | 0.0288 | 0.9628 | 0.6525 | 0.7216 | 7.7385  |         |
| genus. LachnospiraceaeFCS020group. id. 11314 | LargeArteryStroke   | Weighted median           | 4 | 0.6911 | 0.4441 | 1.0754  | 0.1015 | -0.0015 | 0.0288 | 0.9628 | 0.6525 | 0.7216 | 7.7385  |         |
| genus. LachnospiraceaeFCS020group. id. 11314 | LargeArteryStroke   | Inverse variance weighted | 4 | 0.7054 | 0.4951 | 1.0050  | 0.0533 | -0.0015 | 0.0288 | 0.9628 | 0.6525 | 0.7216 | 7.7385  |         |
| genus. LachnospiraceaeFCS020group. id. 11314 | LargeArteryStroke   | Simple mode               | 4 | 0.6157 | 0.3565 | 1.0636  | 0.1804 | -0.0015 | 0.0288 | 0.9628 | 0.6525 | 0.7216 | 7.7385  |         |
| genus. LachnospiraceaeFCS020group. id. 11314 | LargeArteryStroke   | Weighted mode             | 4 | 0.6879 | 0.4026 | 1.1754  | 0.2646 | -0.0015 | 0.0288 | 0.9628 | 0.6525 | 0.7216 | 7.7385  |         |
| genus. LachnospiraceaeFCS020group. id. 11314 | SmallVesselStroke   | MR Egger                  | 4 | 0.5222 | 0.2438 | 1.1186  | 0.2365 | 0.0183  | 0.0275 | 0.5742 | 0.7486 | 0.6878 | 4.0311  |         |
| genus. LachnospiraceaeFCS020group. id. 11314 | SmallVesselStroke   | Weighted median           | 4 | 0.5942 | 0.3905 | 0.9042  | 0.0151 | 0.0183  | 0.0275 | 0.5742 | 0.7486 | 0.6878 | 4.0311  |         |
| genus. LachnospiraceaeFCS020group. id. 11314 | SmallVesselStroke   | Inverse variance weighted | 4 | 0.6587 | 0.4710 | 0.9213  | 0.0147 | 0.0183  | 0.0275 | 0.5742 | 0.7486 | 0.6878 | 4.0311  |         |
| genus. LachnospiraceaeFCS020group. id. 11314 | SmallVesselStroke   | Simple mode               | 4 | 0.5908 | 0.3229 | 1.0809  | 0.1863 | 0.0183  | 0.0275 | 0.5742 | 0.7486 | 0.6878 | 4.0311  |         |
| genus. LachnospiraceaeFCS020group. id. 11314 | SmallVesselStroke   | Weighted mode             | 4 | 0.5845 | 0.3394 | 1.0066  | 0.1482 | 0.0183  | 0.0275 | 0.5742 | 0.7486 | 0.6878 | 4.0311  |         |
| genus. LachnospiraceaeFCS020group. id. 11314 | Stroke              | MR Egger                  | 4 | 0.8785 | 0.6927 | 1.1141  | 0.3970 | -0.0025 | 0.0088 | 0.8012 | 0.9640 | 0.6176 | 24.7965 |         |
| genus. LachnospiraceaeFCS020group. id. 11314 | Stroke              | Weighted median           | 4 | 0.8520 | 0.7434 | 0.9765  | 0.0214 | -0.0025 | 0.0088 | 0.8012 | 0.9640 | 0.6176 | 24.7965 |         |
| genus. LachnospiraceaeFCS020group. id. 11314 | Stroke              | Inverse variance weighted | 4 | 0.8516 | 0.7649 | 0.9482  | 0.0034 | -0.0025 | 0.0088 | 0.8012 | 0.9640 | 0.6176 | 24.7965 |         |
| genus. LachnospiraceaeFCS020group. id. 11314 | Stroke              | Simple mode               | 4 | 0.8064 | 0.6757 | 0.9624  | 0.0972 | -0.0025 | 0.0088 | 0.8012 | 0.9640 | 0.6176 | 24.7965 |         |
| genus. LachnospiraceaeFCS020group. id. 11314 | Stroke              | Weighted mode             | 4 | 0.8691 | 0.7376 | 1.0240  | 0.1923 | -0.0025 | 0.0088 | 0.8012 | 0.9640 | 0.6176 | 24.7965 |         |
| genus. LachnospiraceaeNC2004group. id. 11316 | CardioEmbolicStroke | Inverse variance weighted | 2 | 0.9056 | 0.6992 | 1.1730  | 0.4525 | NA      | NA     | NA     | 0.0203 | 0.8868 | 40.4217 |         |
| genus. LachnospiraceaeNC2004group. id. 11316 | IschemicStroke      | Inverse variance weighted | 2 | 0.9224 | 0.8229 | 1.0340  | 0.1655 | NA      | NA     | NA     | 0.0158 | 0.9000 | 50.2488 |         |
| genus. LachnospiraceaeNC2004group. id. 11316 | LargeArteryStroke   | Inverse variance weighted | 2 | 1.3965 | 0.9801 | 1.9898  | 0.0645 | NA      | NA     | NA     | 0.6130 | 0.4337 | 5.7600  |         |

|                                              |                     |                           |   |        |        |         |        |         |        |        |        |        |         |
|----------------------------------------------|---------------------|---------------------------|---|--------|--------|---------|--------|---------|--------|--------|--------|--------|---------|
| genus. LachnospiraceaeNC2004group. id. 11316 | SmallVesselStroke   | Inverse variance weighted | 2 | 0.9347 | 0.6782 | 1.2883  | 0.6800 | NA      | NA     | NA     | 0.6780 | 0.4103 | 20.3309 |
| genus. LachnospiraceaeNC2004group. id. 11316 | Stroke              | Inverse variance weighted | 2 | 0.9291 | 0.8376 | 1.0305  | 0.1641 | NA      | NA     | NA     | 0.0090 | 0.9242 | 55.7247 |
| genus. LachnospiraceaeUCG001. id. 11321      | CardioEmbolicStroke | MR Egger                  | 4 | 0.4861 | 0.1405 | 1.6809  | 0.3725 |         | 0.0556 | 0.0460 | 0.3502 | 2.2829 | 0.5158  |
| genus. LachnospiraceaeUCG001. id. 11321      | CardioEmbolicStroke | Weighted median           | 4 | 1.0557 | 0.7688 | 1.4496  | 0.7377 |         | 0.0556 | 0.0460 | 0.3502 | 2.2829 | 0.5158  |
| genus. LachnospiraceaeUCG001. id. 11321      | CardioEmbolicStroke | Inverse variance weighted | 4 | 1.0279 | 0.7967 | 1.3261  | 0.8323 |         | 0.0556 | 0.0460 | 0.3502 | 2.2829 | 0.5158  |
| genus. LachnospiraceaeUCG001. id. 11321      | CardioEmbolicStroke | Simple mode               | 4 | 1.0992 | 0.7007 | 1.7244  | 0.7081 |         | 0.0556 | 0.0460 | 0.3502 | 2.2829 | 0.5158  |
| genus. LachnospiraceaeUCG001. id. 11321      | CardioEmbolicStroke | Weighted mode             | 4 | 1.0933 | 0.7059 | 1.6933  | 0.7162 |         | 0.0556 | 0.0460 | 0.3502 | 2.2829 | 0.5158  |
| genus. LachnospiraceaeUCG001. id. 11321      | IschemicStroke      | MR Egger                  | 4 | 1.3100 | 0.5307 | 3.2335  | 0.6173 | -0.0172 | 0.0338 | 0.6620 | 6.1574 | 0.0460 | 24.6978 |
| genus. LachnospiraceaeUCG001. id. 11321      | IschemicStroke      | Weighted median           | 4 | 1.0757 | 0.9292 | 1.2453  | 0.3288 | -0.0172 | 0.0338 | 0.6620 | 6.1574 | 0.0460 | 24.6978 |
| genus. LachnospiraceaeUCG001. id. 11321      | IschemicStroke      | Inverse variance weighted | 4 | 1.0421 | 0.8818 | 1.2315  | 0.6285 | -0.0172 | 0.0338 | 0.6620 | 6.1574 | 0.0460 | 24.6978 |
| genus. LachnospiraceaeUCG001. id. 11321      | IschemicStroke      | Simple mode               | 4 | 1.0991 | 0.8888 | 1.3591  | 0.4475 | -0.0172 | 0.0338 | 0.6620 | 6.1574 | 0.0460 | 24.6978 |
| genus. LachnospiraceaeUCG001. id. 11321      | IschemicStroke      | Weighted mode             | 4 | 1.1009 | 0.8954 | 1.3536  | 0.4289 | -0.0172 | 0.0338 | 0.6620 | 6.1574 | 0.0460 | 24.6978 |
| genus. LachnospiraceaeUCG001. id. 11321      | LargeArteryStroke   | MR Egger                  | 4 | 0.5974 | 0.0599 | 5.9523  | 0.7034 | 0.0194  | 0.0850 | 0.8407 | 3.7953 | 0.1499 | 6.1306  |
| genus. LachnospiraceaeUCG001. id. 11321      | LargeArteryStroke   | Weighted median           | 4 | 0.6859 | 0.4437 | 1.0602  | 0.0897 | 0.0194  | 0.0850 | 0.8407 | 3.7953 | 0.1499 | 6.1306  |
| genus. LachnospiraceaeUCG001. id. 11321      | LargeArteryStroke   | Inverse variance weighted | 4 | 0.7764 | 0.5277 | 1.1423  | 0.1989 | 0.0194  | 0.0850 | 0.8407 | 3.7953 | 0.1499 | 6.1306  |
| genus. LachnospiraceaeUCG001. id. 11321      | LargeArteryStroke   | Simple mode               | 4 | 0.6073 | 0.3226 | 1.1436  | 0.2202 | 0.0194  | 0.0850 | 0.8407 | 3.7953 | 0.1499 | 6.1306  |
| genus. LachnospiraceaeUCG001. id. 11321      | LargeArteryStroke   | Weighted mode             | 4 | 0.6054 | 0.3124 | 1.1729  | 0.2336 | 0.0194  | 0.0850 | 0.8407 | 3.7953 | 0.1499 | 6.1306  |
| genus. LachnospiraceaeUCG001. id. 11321      | SmallVesselStroke   | MR Egger                  | 4 | 2.5908 | 0.5477 | 12.2556 | 0.3528 | -0.0874 | 0.0575 | 0.2681 | 2.7891 | 0.4253 | 8.4908  |
| genus. LachnospiraceaeUCG001. id. 11321      | SmallVesselStroke   | Weighted median           | 4 | 0.7824 | 0.5292 | 1.1566  | 0.2185 | -0.0874 | 0.0575 | 0.2681 | 2.7891 | 0.4253 | 8.4908  |
| genus. LachnospiraceaeUCG001. id. 11321      | SmallVesselStroke   | Inverse variance weighted | 4 | 0.7966 | 0.5809 | 1.0924  | 0.1581 | -0.0874 | 0.0575 | 0.2681 | 2.7891 | 0.4253 | 8.4908  |
| genus. LachnospiraceaeUCG001. id. 11321      | SmallVesselStroke   | Simple mode               | 4 | 0.7150 | 0.4129 | 1.2381  | 0.3170 | -0.0874 | 0.0575 | 0.2681 | 2.7891 | 0.4253 | 8.4908  |
| genus. LachnospiraceaeUCG001. id. 11321      | SmallVesselStroke   | Weighted mode             | 4 | 0.7400 | 0.4109 | 1.3330  | 0.3899 | -0.0874 | 0.0575 | 0.2681 | 2.7891 | 0.4253 | 8.4908  |
| genus. LachnospiraceaeUCG001. id. 11321      | Stroke              | MR Egger                  | 4 | 1.2059 | 0.4621 | 3.1465  | 0.7389 | -0.0134 | 0.0359 | 0.7454 | 8.2330 | 0.0163 | 26.9814 |
| genus. LachnospiraceaeUCG001. id. 11321      | Stroke              | Weighted median           | 4 | 1.0373 | 0.9043 | 1.1899  | 0.6006 | -0.0134 | 0.0359 | 0.7454 | 8.2330 | 0.0163 | 26.9814 |
| genus. LachnospiraceaeUCG001. id. 11321      | Stroke              | Inverse variance weighted | 4 | 1.0093 | 0.8486 | 1.2005  | 0.9167 | -0.0134 | 0.0359 | 0.7454 | 8.2330 | 0.0163 | 26.9814 |
| genus. LachnospiraceaeUCG001. id. 11321      | Stroke              | Simple mode               | 4 | 1.0527 | 0.8544 | 1.2972  | 0.6624 | -0.0134 | 0.0359 | 0.7454 | 8.2330 | 0.0163 | 26.9814 |
| genus. LachnospiraceaeUCG001. id. 11321      | Stroke              | Weighted mode             | 4 | 1.0509 | 0.8639 | 1.2784  | 0.6536 | -0.0134 | 0.0359 | 0.7454 | 8.2330 | 0.0163 | 26.9814 |
| genus. LachnospiraceaeUCG004. id. 11324      | CardioEmbolicStroke | MR Egger                  | 5 | 0.7747 | 0.3111 | 1.9295  | 0.6217 | 0.0143  | 0.0342 | 0.7038 | 2.2260 | 0.5269 | 13.2658 |
| genus. LachnospiraceaeUCG004. id. 11324      | CardioEmbolicStroke | Weighted median           | 5 | 1.0205 | 0.7096 | 1.4677  | 0.9129 | 0.0143  | 0.0342 | 0.7038 | 2.2260 | 0.5269 | 13.2658 |
| genus. LachnospiraceaeUCG004. id. 11324      | CardioEmbolicStroke | Inverse variance weighted | 5 | 0.9330 | 0.7102 | 1.2258  | 0.6186 | 0.0143  | 0.0342 | 0.7038 | 2.2260 | 0.5269 | 13.2658 |
| genus. LachnospiraceaeUCG004. id. 11324      | CardioEmbolicStroke | Simple mode               | 5 | 1.0832 | 0.6772 | 1.7328  | 0.7555 | 0.0143  | 0.0342 | 0.7038 | 2.2260 | 0.5269 | 13.2658 |
| genus. LachnospiraceaeUCG004. id. 11324      | CardioEmbolicStroke | Weighted mode             | 5 | 1.0806 | 0.6618 | 1.7643  | 0.7722 | 0.0143  | 0.0342 | 0.7038 | 2.2260 | 0.5269 | 13.2658 |
| genus. LachnospiraceaeUCG004. id. 11324      | IschemicStroke      | MR Egger                  | 5 | 0.9449 | 0.6303 | 1.4164  | 0.8015 | 0.0086  | 0.0151 | 0.6087 | 0.3863 | 0.9431 | 71.2462 |
| genus. LachnospiraceaeUCG004. id. 11324      | IschemicStroke      | Weighted median           | 5 | 1.0523 | 0.9047 | 1.2239  | 0.5088 | 0.0086  | 0.0151 | 0.6087 | 0.3863 | 0.9431 | 71.2462 |
| genus. LachnospiraceaeUCG004. id. 11324      | IschemicStroke      | Inverse variance weighted | 5 | 1.0572 | 0.9370 | 1.1929  | 0.3666 | 0.0086  | 0.0151 | 0.6087 | 0.3863 | 0.9431 | 71.2462 |
| genus. LachnospiraceaeUCG004. id. 11324      | IschemicStroke      | Simple mode               | 5 | 1.0512 | 0.8634 | 1.2799  | 0.6451 | 0.0086  | 0.0151 | 0.6087 | 0.3863 | 0.9431 | 71.2462 |
| genus. LachnospiraceaeUCG004. id. 11324      | IschemicStroke      | Weighted mode             | 5 | 1.0517 | 0.8638 | 1.2805  | 0.6421 | 0.0086  | 0.0151 | 0.6087 | 0.3863 | 0.9431 | 71.2462 |
| genus. LachnospiraceaeUCG004. id. 11324      | LargeArteryStroke   | MR Egger                  | 5 | 0.9717 | 0.2884 | 3.2738  | 0.9659 | 0.0150  | 0.0457 | 0.7638 | 2.1177 | 0.5483 | 11.2004 |
| genus. LachnospiraceaeUCG004. id. 11324      | LargeArteryStroke   | Weighted median           | 5 | 1.1701 | 0.7313 | 1.8720  | 0.5125 | 0.0150  | 0.0457 | 0.7638 | 2.1177 | 0.5483 | 11.2004 |
| genus. LachnospiraceaeUCG004. id. 11324      | LargeArteryStroke   | Inverse variance weighted | 5 | 1.1803 | 0.8202 | 1.6985  | 0.3721 | 0.0150  | 0.0457 | 0.7638 | 2.1177 | 0.5483 | 11.2004 |
| genus. LachnospiraceaeUCG004. id. 11324      | LargeArteryStroke   | Simple mode               | 5 | 1.0953 | 0.5843 | 2.0534  | 0.7905 | 0.0150  | 0.0457 | 0.7638 | 2.1177 | 0.5483 | 11.2004 |
| genus. LachnospiraceaeUCG004. id. 11324      | LargeArteryStroke   | Weighted mode             | 5 | 1.1246 | 0.5814 | 2.1752  | 0.7448 | 0.0150  | 0.0457 | 0.7638 | 2.1177 | 0.5483 | 11.2004 |
| genus. LachnospiraceaeUCG004. id. 11324      | SmallVesselStroke   | MR Egger                  | 5 | 0.8983 | 0.2856 | 2.8250  | 0.8661 | 0.0136  | 0.0437 | 0.7762 | 2.3131 | 0.5100 | 10.3721 |
| genus. LachnospiraceaeUCG004. id. 11324      | SmallVesselStroke   | Weighted median           | 5 | 1.1851 | 0.7638 | 1.8386  | 0.4486 | 0.0136  | 0.0437 | 0.7762 | 2.3131 | 0.5100 | 10.3721 |
| genus. LachnospiraceaeUCG004. id. 11324      | SmallVesselStroke   | Inverse variance weighted | 5 | 1.0683 | 0.7574 | 1.5068  | 0.7066 | 0.0136  | 0.0437 | 0.7762 | 2.3131 | 0.5100 | 10.3721 |
| genus. LachnospiraceaeUCG004. id. 11324      | SmallVesselStroke   | Simple mode               | 5 | 1.2920 | 0.7485 | 2.2304  | 0.4097 | 0.0136  | 0.0437 | 0.7762 | 2.3131 | 0.5100 | 10.3721 |
| genus. LachnospiraceaeUCG004. id. 11324      | SmallVesselStroke   | Weighted mode             | 5 | 1.2849 | 0.6716 | 2.4583  | 0.4910 | 0.0136  | 0.0437 | 0.7762 | 2.3131 | 0.5100 | 10.3721 |
| genus. LachnospiraceaeUCG004. id. 11324      | Stroke              | MR Egger                  | 5 | 0.8972 | 0.6179 | 1.3028  | 0.6087 | 0.0094  | 0.0140 | 0.5484 | 0.8965 | 0.9251 | 88.3361 |
| genus. LachnospiraceaeUCG004. id. 11324      | Stroke              | Weighted median           | 5 | 1.0081 | 0.8797 | 1.1552  | 0.9074 | 0.0094  | 0.0140 | 0.5484 | 0.8965 | 0.9251 | 88.3361 |
| genus. LachnospiraceaeUCG004. id. 11324      | Stroke              | Inverse variance weighted | 5 | 1.0141 | 0.9071 | 1.1337  | 0.8055 | 0.0094  | 0.0140 | 0.5484 | 0.8965 | 0.9251 | 88.3361 |
| genus. LachnospiraceaeUCG004. id. 11324      | Stroke              | Simple mode               | 5 | 1.0107 | 0.8458 | 1.2078  | 0.9121 | 0.0094  | 0.0140 | 0.5484 | 0.8965 | 0.9251 | 88.3361 |
| genus. LachnospiraceaeUCG004. id. 11324      | Stroke              | Weighted mode             | 5 | 1.0102 | 0.8394 | 1.2158  | 0.9194 | 0.0094  | 0.0140 | 0.5484 | 0.8965 | 0.9251 | 88.3361 |
| genus. LachnospiraceaeUCG008. id. 11328      | CardioEmbolicStroke | MR Egger                  | 3 | 0.3240 | 0.0018 | 57.9636 | 0.7437 | 0.1149  | 0.2268 | 0.7014 | 1.7473 | 0.1862 | 9.6621  |
| genus. LachnospiraceaeUCG008. id. 11328      | CardioEmbolicStroke | Weighted median           | 3 | 1.3366 | 0.9664 | 1.8487  | 0.0795 | 0.1149  | 0.2268 | 0.7014 | 1.7473 | 0.1862 | 9.6621  |

|                                         |                     |                           |   |        |        |           |        |         |        |        |        |        |          |
|-----------------------------------------|---------------------|---------------------------|---|--------|--------|-----------|--------|---------|--------|--------|--------|--------|----------|
| genus. LachnospiraceaeUCG008. id. 11328 | CardioEmbolicStroke | Inverse variance weighted | 3 | 1.2355 | 0.9616 | 1.5875    | 0.0982 | 0.1149  | 0.2268 | 0.7014 | 1.7473 | 0.1862 | 9.6621   |
| genus. LachnospiraceaeUCG008. id. 11328 | CardioEmbolicStroke | Simple mode               | 3 | 1.3838 | 0.9316 | 2.0557    | 0.2489 | 0.1149  | 0.2268 | 0.7014 | 1.7473 | 0.1862 | 9.6621   |
| genus. LachnospiraceaeUCG008. id. 11328 | CardioEmbolicStroke | Weighted mode             | 3 | 1.3863 | 0.9142 | 2.1024    | 0.2640 | 0.1149  | 0.2268 | 0.7014 | 1.7473 | 0.1862 | 9.6621   |
| genus. LachnospiraceaeUCG008. id. 11328 | IschemicStroke      | MR Egger                  | 3 | 1.3900 | 0.1061 | 18.2167   | 0.8435 | -0.0237 | 0.1126 | 0.8681 | 2.2202 | 0.1362 | 32.0733  |
| genus. LachnospiraceaeUCG008. id. 11328 | IschemicStroke      | Weighted median           | 3 | 1.0622 | 0.9260 | 1.2185    | 0.3886 | -0.0237 | 0.1126 | 0.8681 | 2.2202 | 0.1362 | 32.0733  |
| genus. LachnospiraceaeUCG008. id. 11328 | IschemicStroke      | Inverse variance weighted | 3 | 1.0554 | 0.9417 | 1.1827    | 0.3539 | -0.0237 | 0.1126 | 0.8681 | 2.2202 | 0.1362 | 32.0733  |
| genus. LachnospiraceaeUCG008. id. 11328 | IschemicStroke      | Simple mode               | 3 | 1.0798 | 0.9015 | 1.2933    | 0.4923 | -0.0237 | 0.1126 | 0.8681 | 2.2202 | 0.1362 | 32.0733  |
| genus. LachnospiraceaeUCG008. id. 11328 | IschemicStroke      | Weighted mode             | 3 | 1.0784 | 0.9143 | 1.2719    | 0.4649 | -0.0237 | 0.1126 | 0.8681 | 2.2202 | 0.1362 | 32.0733  |
| genus. LachnospiraceaeUCG008. id. 11328 | LargeArteryStroke   | MR Egger                  | 3 | 1.6795 | 0.0022 | 1267.8485 | 0.9031 | -0.0338 | 0.2892 | 0.9260 | 1.5882 | 0.2076 | 10.1425  |
| genus. LachnospiraceaeUCG008. id. 11328 | LargeArteryStroke   | Weighted median           | 3 | 1.1666 | 0.7535 | 1.8062    | 0.4896 | -0.0338 | 0.2892 | 0.9260 | 1.5882 | 0.2076 | 10.1425  |
| genus. LachnospiraceaeUCG008. id. 11328 | LargeArteryStroke   | Inverse variance weighted | 3 | 1.1325 | 0.8218 | 1.5606    | 0.4470 | -0.0338 | 0.2892 | 0.9260 | 1.5882 | 0.2076 | 10.1425  |
| genus. LachnospiraceaeUCG008. id. 11328 | LargeArteryStroke   | Simple mode               | 3 | 1.2401 | 0.7684 | 2.0015    | 0.4712 | -0.0338 | 0.2892 | 0.9260 | 1.5882 | 0.2076 | 10.1425  |
| genus. LachnospiraceaeUCG008. id. 11328 | LargeArteryStroke   | Weighted mode             | 3 | 1.2160 | 0.7500 | 1.9715    | 0.5108 | -0.0338 | 0.2892 | 0.9260 | 1.5882 | 0.2076 | 10.1425  |
| genus. LachnospiraceaeUCG008. id. 11328 | SmallVesselStroke   | MR Egger                  | 3 | 1.4268 | 0.0006 | 3669.7325 | 0.9437 | -0.0444 | 0.3433 | 0.9181 | 2.5282 | 0.1118 | 7.8085   |
| genus. LachnospiraceaeUCG008. id. 11328 | SmallVesselStroke   | Weighted median           | 3 | 0.8966 | 0.5923 | 1.3573    | 0.6059 | -0.0444 | 0.3433 | 0.9181 | 2.5282 | 0.1118 | 7.8085   |
| genus. LachnospiraceaeUCG008. id. 11328 | SmallVesselStroke   | Inverse variance weighted | 3 | 0.8504 | 0.6056 | 1.1941    | 0.3494 | -0.0444 | 0.3433 | 0.9181 | 2.5282 | 0.1118 | 7.8085   |
| genus. LachnospiraceaeUCG008. id. 11328 | SmallVesselStroke   | Simple mode               | 3 | 0.9413 | 0.5654 | 1.5672    | 0.8378 | -0.0444 | 0.3433 | 0.9181 | 2.5282 | 0.1118 | 7.8085   |
| genus. LachnospiraceaeUCG008. id. 11328 | SmallVesselStroke   | Weighted mode             | 3 | 0.9413 | 0.5856 | 1.5131    | 0.8262 | -0.0444 | 0.3433 | 0.9181 | 2.5282 | 0.1118 | 7.8085   |
| genus. LachnospiraceaeUCG008. id. 11328 | Stroke              | MR Egger                  | 3 | 1.0665 | 0.0845 | 13.4576   | 0.9684 | -0.0014 | 0.1110 | 0.9922 | 2.5800 | 0.1082 | 34.7324  |
| genus. LachnospiraceaeUCG008. id. 11328 | Stroke              | Weighted median           | 3 | 1.0756 | 0.9449 | 1.2244    | 0.2699 | -0.0014 | 0.1110 | 0.9922 | 2.5800 | 0.1082 | 34.7324  |
| genus. LachnospiraceaeUCG008. id. 11328 | Stroke              | Inverse variance weighted | 3 | 1.0496 | 0.9411 | 1.1706    | 0.3842 | -0.0014 | 0.1110 | 0.9922 | 2.5800 | 0.1082 | 34.7324  |
| genus. LachnospiraceaeUCG008. id. 11328 | Stroke              | Simple mode               | 3 | 1.1013 | 0.9401 | 1.2901    | 0.3547 | -0.0014 | 0.1110 | 0.9922 | 2.5800 | 0.1082 | 34.7324  |
| genus. LachnospiraceaeUCG008. id. 11328 | Stroke              | Weighted mode             | 3 | 1.0989 | 0.9473 | 1.2748    | 0.3392 | -0.0014 | 0.1110 | 0.9922 | 2.5800 | 0.1082 | 34.7324  |
| genus. LachnospiraceaeUCG010. id. 11330 | CardioEmbolicStroke | Inverse variance weighted | 2 | 1.1898 | 0.5322 | 2.6597    | 0.6720 | NA      | NA     | NA     | 7.6178 | 0.0058 | 5.9225   |
| genus. LachnospiraceaeUCG010. id. 11330 | IschemicStroke      | Inverse variance weighted | 2 | 1.0452 | 0.9098 | 1.2007    | 0.5321 | NA      | NA     | NA     | 1.0697 | 0.3010 | 53.4107  |
| genus. LachnospiraceaeUCG010. id. 11330 | LargeArteryStroke   | Inverse variance weighted | 2 | 1.4206 | 0.9579 | 2.1069    | 0.0808 | NA      | NA     | NA     | 0.3286 | 0.5665 | 9.1188   |
| genus. LachnospiraceaeUCG010. id. 11330 | SmallVesselStroke   | Inverse variance weighted | 2 | 1.2567 | 0.8468 | 1.8649    | 0.2566 | NA      | NA     | NA     | 1.0811 | 0.2984 | 9.0362   |
| genus. LachnospiraceaeUCG010. id. 11330 | Stroke              | Inverse variance weighted | 2 | 1.0235 | 0.8569 | 1.2226    | 0.7976 | NA      | NA     | NA     | 2.1197 | 0.1454 | 52.6716  |
| genus. Lactobacillus. id. 1837          | CardioEmbolicStroke | Inverse variance weighted | 2 | 0.7670 | 0.5891 | 0.9985    | 0.0487 | NA      | NA     | NA     | 0.0522 | 0.8193 | 15.2935  |
| genus. Lactobacillus. id. 1837          | IschemicStroke      | Inverse variance weighted | 2 | 0.9343 | 0.8400 | 1.0392    | 0.2108 | NA      | NA     | NA     | 1.0556 | 0.3042 | 67.3361  |
| genus. Lactobacillus. id. 1837          | LargeArteryStroke   | Inverse variance weighted | 2 | 0.9073 | 0.5362 | 1.5352    | 0.7169 | NA      | NA     | NA     | 1.7859 | 0.1814 | 14.7992  |
| genus. Lactobacillus. id. 1837          | SmallVesselStroke   | Inverse variance weighted | 2 | 0.7452 | 0.5327 | 1.0423    | 0.0858 | NA      | NA     | NA     | 0.0140 | 0.9059 | 12.9940  |
| genus. Lactobacillus. id. 1837          | Stroke              | Inverse variance weighted | 2 | 0.9476 | 0.8600 | 1.0441    | 0.2769 | NA      | NA     | NA     | 0.0732 | 0.7867 | 109.0755 |
| genus. Lactococcus. id. 1851            | CardioEmbolicStroke | MR Egger                  | 3 | 0.9362 | 0.4174 | 2.0996    | 0.8990 | -0.0077 | 0.0562 | 0.9132 | 0.5429 | 0.4613 | 33.3165  |
| genus. Lactococcus. id. 1851            | CardioEmbolicStroke | Weighted median           | 3 | 0.8700 | 0.6978 | 1.0848    | 0.2161 | -0.0077 | 0.0562 | 0.9132 | 0.5429 | 0.4613 | 33.3165  |
| genus. Lactococcus. id. 1851            | CardioEmbolicStroke | Inverse variance weighted | 3 | 0.8861 | 0.7351 | 1.0681    | 0.2044 | -0.0077 | 0.0562 | 0.9132 | 0.5429 | 0.4613 | 33.3165  |
| genus. Lactococcus. id. 1851            | CardioEmbolicStroke | Simple mode               | 3 | 0.8431 | 0.6481 | 1.0968    | 0.3314 | -0.0077 | 0.0562 | 0.9132 | 0.5429 | 0.4613 | 33.3165  |
| genus. Lactococcus. id. 1851            | CardioEmbolicStroke | Weighted mode             | 3 | 0.8446 | 0.6441 | 1.1076    | 0.3464 | -0.0077 | 0.0562 | 0.9132 | 0.5429 | 0.4613 | 33.3165  |
| genus. Lactococcus. id. 1851            | IschemicStroke      | MR Egger                  | 3 | 0.8258 | 0.5807 | 1.1742    | 0.4797 | 0.0210  | 0.0244 | 0.5482 | 0.8630 | 0.3529 | 60.7152  |
| genus. Lactococcus. id. 1851            | IschemicStroke      | Weighted median           | 3 | 0.9740 | 0.8736 | 1.0860    | 0.6355 | 0.0210  | 0.0244 | 0.5482 | 0.8630 | 0.3529 | 60.7152  |
| genus. Lactococcus. id. 1851            | IschemicStroke      | Inverse variance weighted | 3 | 0.9595 | 0.8846 | 1.0408    | 0.3195 | 0.0210  | 0.0244 | 0.5482 | 0.8630 | 0.3529 | 60.7152  |
| genus. Lactococcus. id. 1851            | IschemicStroke      | Simple mode               | 3 | 0.9846 | 0.8662 | 1.1192    | 0.8343 | 0.0210  | 0.0244 | 0.5482 | 0.8630 | 0.3529 | 60.7152  |
| genus. Lactococcus. id. 1851            | IschemicStroke      | Weighted mode             | 3 | 0.9877 | 0.8722 | 1.1185    | 0.8633 | 0.0210  | 0.0244 | 0.5482 | 0.8630 | 0.3529 | 60.7152  |
| genus. Lactococcus. id. 1851            | LargeArteryStroke   | MR Egger                  | 3 | 0.9743 | 0.3358 | 2.8267    | 0.9695 | -0.0094 | 0.0741 | 0.9198 | 0.8194 | 0.3653 | 34.4686  |
| genus. Lactococcus. id. 1851            | LargeArteryStroke   | Weighted median           | 3 | 0.9801 | 0.7153 | 1.3430    | 0.9006 | -0.0094 | 0.0741 | 0.9198 | 0.8194 | 0.3653 | 34.4686  |
| genus. Lactococcus. id. 1851            | LargeArteryStroke   | Inverse variance weighted | 3 | 0.9113 | 0.7090 | 1.1714    | 0.4683 | -0.0094 | 0.0741 | 0.9198 | 0.8194 | 0.3653 | 34.4686  |
| genus. Lactococcus. id. 1851            | LargeArteryStroke   | Simple mode               | 3 | 0.9880 | 0.6835 | 1.4281    | 0.9546 | -0.0094 | 0.0741 | 0.9198 | 0.8194 | 0.3653 | 34.4686  |
| genus. Lactococcus. id. 1851            | LargeArteryStroke   | Weighted mode             | 3 | 0.9880 | 0.6903 | 1.4141    | 0.9534 | -0.0094 | 0.0741 | 0.9198 | 0.8194 | 0.3653 | 34.4686  |
| genus. Lactococcus. id. 1851            | SmallVesselStroke   | MR Egger                  | 3 | 0.8502 | 0.2619 | 2.7595    | 0.8320 | -0.0110 | 0.0812 | 0.9145 | 1.4083 | 0.2353 | 12.8356  |
| genus. Lactococcus. id. 1851            | SmallVesselStroke   | Weighted median           | 3 | 0.7530 | 0.5637 | 1.0059    | 0.0548 | -0.0110 | 0.0812 | 0.9145 | 1.4083 | 0.2353 | 12.8356  |
| genus. Lactococcus. id. 1851            | SmallVesselStroke   | Inverse variance weighted | 3 | 0.7856 | 0.6255 | 0.9868    | 0.0381 | -0.0110 | 0.0812 | 0.9145 | 1.4083 | 0.2353 | 12.8356  |
| genus. Lactococcus. id. 1851            | SmallVesselStroke   | Simple mode               | 3 | 0.7107 | 0.4963 | 1.0178    | 0.2034 | -0.0110 | 0.0812 | 0.9145 | 1.4083 | 0.2353 | 12.8356  |
| genus. Lactococcus. id. 1851            | SmallVesselStroke   | Weighted mode             | 3 | 0.7117 | 0.4935 | 1.0264    | 0.2103 | -0.0110 | 0.0812 | 0.9145 | 1.4083 | 0.2353 | 12.8356  |
| genus. Lactococcus. id. 1851            | Stroke              | MR Egger                  | 3 | 0.7216 | 0.5213 | 0.9989    | 0.2995 | 0.0414  | 0.0226 | 0.3180 | 4.3453 | 0.1139 | 44.8918  |

|                                 |                     |                           |   |        |        |        |        |         |        |        |        |        |          |
|---------------------------------|---------------------|---------------------------|---|--------|--------|--------|--------|---------|--------|--------|--------|--------|----------|
| genus. Lactococcus. id. 1851    | Stroke              | Weighted median           | 3 | 1.0248 | 0.9209 | 1.1403 | 0.6537 | 0.0414  | 0.0226 | 0.3180 | 4.3453 | 0.1139 | 44.8918  |
| genus. Lactococcus. id. 1851    | Stroke              | Inverse variance weighted | 3 | 0.9699 | 0.8681 | 1.0837 | 0.5897 | 0.0414  | 0.0226 | 0.3180 | 4.3453 | 0.1139 | 44.8918  |
| genus. Lactococcus. id. 1851    | Stroke              | Simple mode               | 3 | 1.0266 | 0.9048 | 1.1648 | 0.7230 | 0.0414  | 0.0226 | 0.3180 | 4.3453 | 0.1139 | 44.8918  |
| genus. Lactococcus. id. 1851    | Stroke              | Weighted mode             | 3 | 1.0266 | 0.9118 | 1.1558 | 0.7065 | 0.0414  | 0.0226 | 0.3180 | 4.3453 | 0.1139 | 44.8918  |
| genus. Marvinbryantia. id. 2005 | CardioEmbolicStroke | Inverse variance weighted | 2 | 0.7569 | 0.4909 | 1.1670 | 0.2073 | NA      | NA     | NA     | 1.4064 | 0.2357 | 4.8425   |
| genus. Marvinbryantia. id. 2005 | IschemicStroke      | Inverse variance weighted | 2 | 0.9542 | 0.8122 | 1.1211 | 0.5689 | NA      | NA     | NA     | 0.0673 | 0.7954 | 54.9681  |
| genus. Marvinbryantia. id. 2005 | LargeArteryStroke   | Inverse variance weighted | 2 | 0.8527 | 0.3411 | 2.1316 | 0.7332 | NA      | NA     | NA     | 3.6847 | 0.0549 | 3.1723   |
| genus. Marvinbryantia. id. 2005 | SmallVesselStroke   | Inverse variance weighted | 2 | 0.7316 | 0.4660 | 1.1487 | 0.1745 | NA      | NA     | NA     | 0.6732 | 0.4119 | 4.7123   |
| genus. Marvinbryantia. id. 2005 | Stroke              | Inverse variance weighted | 2 | 0.9667 | 0.8310 | 1.1247 | 0.6612 | NA      | NA     | NA     | 0.0416 | 0.8384 | 97.5294  |
| genus. Odoribacter. id. 952     | CardioEmbolicStroke | Inverse variance weighted | 2 | 0.8521 | 0.5641 | 1.2870 | 0.4467 | NA      | NA     | NA     | 0.2550 | 0.6136 | 16.1308  |
| genus. Odoribacter. id. 952     | IschemicStroke      | Inverse variance weighted | 2 | 0.9205 | 0.7699 | 1.1006 | 0.3638 | NA      | NA     | NA     | 0.1375 | 0.7107 | 39.7360  |
| genus. Odoribacter. id. 952     | LargeArteryStroke   | Inverse variance weighted | 2 | 0.6902 | 0.3220 | 1.4796 | 0.3406 | NA      | NA     | NA     | 1.7898 | 0.1810 | 3.5705   |
| genus. Odoribacter. id. 952     | SmallVesselStroke   | Inverse variance weighted | 2 | 1.5961 | 0.9432 | 2.7007 | 0.0815 | NA      | NA     | NA     | 0.1854 | 0.6667 | 4.3185   |
| genus. Odoribacter. id. 952     | Stroke              | Inverse variance weighted | 2 | 0.9547 | 0.8112 | 1.1235 | 0.5764 | NA      | NA     | NA     | 0.0062 | 0.9373 | 77.9839  |
| genus. Olsenella. id. 822       | CardioEmbolicStroke | Inverse variance weighted | 2 | 1.0043 | 0.7987 | 1.2627 | 0.9708 | NA      | NA     | NA     | 0.0075 | 0.9308 | 670.5703 |
| genus. Olsenella. id. 822       | IschemicStroke      | Inverse variance weighted | 2 | 1.0220 | 0.9308 | 1.1221 | 0.6482 | NA      | NA     | NA     | 0.0981 | 0.7541 | 291.1117 |
| genus. Olsenella. id. 822       | LargeArteryStroke   | Inverse variance weighted | 2 | 1.3906 | 1.0077 | 1.9190 | 0.0448 | NA      | NA     | NA     | 0.0182 | 0.8926 | 10.4654  |
| genus. Olsenella. id. 822       | SmallVesselStroke   | Inverse variance weighted | 2 | 1.0415 | 0.7787 | 1.3929 | 0.7841 | NA      | NA     | NA     | 0.7811 | 0.3768 | 40.0176  |
| genus. Olsenella. id. 822       | Stroke              | Inverse variance weighted | 2 | 1.0271 | 0.9418 | 1.1201 | 0.5457 | NA      | NA     | NA     | 0.5777 | 0.4472 | 170.0190 |
| genus. Oscillibacter. id. 2063  | CardioEmbolicStroke | MR Egger                  | 5 | 1.4436 | 0.5907 | 3.5276 | 0.4795 | -0.0078 | 0.0388 | 0.8538 | 4.9929 | 0.1723 | 9.2561   |
| genus. Oscillibacter. id. 2063  | CardioEmbolicStroke | Weighted median           | 5 | 1.1423 | 0.8418 | 1.5501 | 0.3931 | -0.0078 | 0.0388 | 0.8538 | 4.9929 | 0.1723 | 9.2561   |
| genus. Oscillibacter. id. 2063  | CardioEmbolicStroke | Inverse variance weighted | 5 | 1.3237 | 1.0329 | 1.6963 | 0.0267 | -0.0078 | 0.0388 | 0.8538 | 4.9929 | 0.1723 | 9.2561   |
| genus. Oscillibacter. id. 2063  | CardioEmbolicStroke | Simple mode               | 5 | 1.1299 | 0.7466 | 1.7101 | 0.5944 | -0.0078 | 0.0388 | 0.8538 | 4.9929 | 0.1723 | 9.2561   |
| genus. Oscillibacter. id. 2063  | CardioEmbolicStroke | Weighted mode             | 5 | 1.1226 | 0.7772 | 1.6216 | 0.5709 | -0.0078 | 0.0388 | 0.8538 | 4.9929 | 0.1723 | 9.2561   |
| genus. Oscillibacter. id. 2063  | IschemicStroke      | MR Egger                  | 5 | 1.0477 | 0.6209 | 1.7681 | 0.8725 | 0.0024  | 0.0226 | 0.9232 | 9.0326 | 0.0289 | 30.6849  |
| genus. Oscillibacter. id. 2063  | IschemicStroke      | Weighted median           | 5 | 0.9855 | 0.8557 | 1.1351 | 0.8398 | 0.0024  | 0.0226 | 0.9232 | 9.0326 | 0.0289 | 30.6849  |
| genus. Oscillibacter. id. 2063  | IschemicStroke      | Inverse variance weighted | 5 | 1.0760 | 0.9342 | 1.2392 | 0.3097 | 0.0024  | 0.0226 | 0.9232 | 9.0326 | 0.0289 | 30.6849  |
| genus. Oscillibacter. id. 2063  | IschemicStroke      | Simple mode               | 5 | 0.9605 | 0.7866 | 1.1727 | 0.7122 | 0.0024  | 0.0226 | 0.9232 | 9.0326 | 0.0289 | 30.6849  |
| genus. Oscillibacter. id. 2063  | IschemicStroke      | Weighted mode             | 5 | 0.9655 | 0.8007 | 1.1642 | 0.7316 | 0.0024  | 0.0226 | 0.9232 | 9.0326 | 0.0289 | 30.6849  |
| genus. Oscillibacter. id. 2063  | LargeArteryStroke   | MR Egger                  | 4 | 0.9961 | 0.3144 | 3.1554 | 0.9953 | 0.0047  | 0.0500 | 0.9331 | 2.6759 | 0.2624 | 12.0712  |
| genus. Oscillibacter. id. 2063  | LargeArteryStroke   | Weighted median           | 4 | 1.1443 | 0.7765 | 1.6862 | 0.4956 | 0.0047  | 0.0500 | 0.9331 | 2.6759 | 0.2624 | 12.0712  |
| genus. Oscillibacter. id. 2063  | LargeArteryStroke   | Inverse variance weighted | 4 | 1.0501 | 0.7623 | 1.4465 | 0.7649 | 0.0047  | 0.0500 | 0.9331 | 2.6759 | 0.2624 | 12.0712  |
| genus. Oscillibacter. id. 2063  | LargeArteryStroke   | Simple mode               | 4 | 1.2705 | 0.7248 | 2.2272 | 0.4645 | 0.0047  | 0.0500 | 0.9331 | 2.6759 | 0.2624 | 12.0712  |
| genus. Oscillibacter. id. 2063  | LargeArteryStroke   | Weighted mode             | 4 | 1.2780 | 0.7079 | 2.3075 | 0.4753 | 0.0047  | 0.0500 | 0.9331 | 2.6759 | 0.2624 | 12.0712  |
| genus. Oscillibacter. id. 2063  | SmallVesselStroke   | MR Egger                  | 3 | 0.4606 | 0.0614 | 3.4530 | 0.5886 | 0.0728  | 0.0773 | 0.5190 | 0.9418 | 0.6244 | 12.3805  |
| genus. Oscillibacter. id. 2063  | SmallVesselStroke   | Weighted median           | 3 | 1.2302 | 0.8053 | 1.8792 | 0.3379 | 0.0728  | 0.0773 | 0.5190 | 0.9418 | 0.6244 | 12.3805  |
| genus. Oscillibacter. id. 2063  | SmallVesselStroke   | Inverse variance weighted | 3 | 1.1960 | 0.8510 | 1.6810 | 0.3026 | 0.0728  | 0.0773 | 0.5190 | 0.9418 | 0.6244 | 12.3805  |
| genus. Oscillibacter. id. 2063  | SmallVesselStroke   | Simple mode               | 3 | 1.3124 | 0.7919 | 2.1748 | 0.4021 | 0.0728  | 0.0773 | 0.5190 | 0.9418 | 0.6244 | 12.3805  |
| genus. Oscillibacter. id. 2063  | SmallVesselStroke   | Weighted mode             | 3 | 1.3026 | 0.7879 | 2.1533 | 0.4110 | 0.0728  | 0.0773 | 0.5190 | 0.9418 | 0.6244 | 12.3805  |
| genus. Oscillibacter. id. 2063  | Stroke              | MR Egger                  | 5 | 1.0824 | 0.7241 | 1.6180 | 0.7252 | 0.0014  | 0.0172 | 0.9383 | 6.1109 | 0.1063 | 35.9393  |
| genus. Oscillibacter. id. 2063  | Stroke              | Weighted median           | 5 | 1.0133 | 0.8921 | 1.1509 | 0.8390 | 0.0014  | 0.0172 | 0.9383 | 6.1109 | 0.1063 | 35.9393  |
| genus. Oscillibacter. id. 2063  | Stroke              | Inverse variance weighted | 5 | 1.1003 | 0.9889 | 1.2243 | 0.0792 | 0.0014  | 0.0172 | 0.9383 | 6.1109 | 0.1063 | 35.9393  |
| genus. Oscillibacter. id. 2063  | Stroke              | Simple mode               | 5 | 1.0059 | 0.8469 | 1.1946 | 0.9502 | 0.0014  | 0.0172 | 0.9383 | 6.1109 | 0.1063 | 35.9393  |
| genus. Oscillibacter. id. 2063  | Stroke              | Weighted mode             | 5 | 1.0072 | 0.8484 | 1.1958 | 0.9383 | 0.0014  | 0.0172 | 0.9383 | 6.1109 | 0.1063 | 35.9393  |
| genus. Oscillospira. id. 2064   | CardioEmbolicStroke | Inverse variance weighted | 2 | 0.9350 | 0.6298 | 1.3881 | 0.7389 | NA      | NA     | NA     | 0.2170 | 0.6413 | 20.6477  |
| genus. Oscillospira. id. 2064   | IschemicStroke      | Inverse variance weighted | 2 | 1.0213 | 0.8694 | 1.1997 | 0.7979 | NA      | NA     | NA     | 0.0006 | 0.9811 | 158.1746 |
| genus. Oscillospira. id. 2064   | LargeArteryStroke   | Inverse variance weighted | 2 | 0.8900 | 0.3715 | 2.1322 | 0.7937 | NA      | NA     | NA     | 2.5025 | 0.1137 | 3.3378   |
| genus. Oscillospira. id. 2064   | SmallVesselStroke   | Inverse variance weighted | 2 | 1.3996 | 0.8618 | 2.2730 | 0.1742 | NA      | NA     | NA     | 0.0009 | 0.9757 | 6.2992   |
| genus. Oscillospira. id. 2064   | Stroke              | Inverse variance weighted | 2 | 1.0634 | 0.9165 | 1.2338 | 0.4178 | NA      | NA     | NA     | 0.0810 | 0.7759 | 50.3221  |
| genus. Oxalobacter. id. 2978    | CardioEmbolicStroke | MR Egger                  | 6 | 0.8099 | 0.4452 | 1.4734 | 0.5278 | 0.0251  | 0.0441 | 0.6002 | 1.1189 | 0.8913 | 90.5430  |
| genus. Oxalobacter. id. 2978    | CardioEmbolicStroke | Weighted median           | 6 | 0.9458 | 0.8101 | 1.1043 | 0.4810 | 0.0251  | 0.0441 | 0.6002 | 1.1189 | 0.8913 | 90.5430  |
| genus. Oxalobacter. id. 2978    | CardioEmbolicStroke | Inverse variance weighted | 6 | 0.9592 | 0.8403 | 1.0949 | 0.5374 | 0.0251  | 0.0441 | 0.6002 | 1.1189 | 0.8913 | 90.5430  |
| genus. Oxalobacter. id. 2978    | CardioEmbolicStroke | Simple mode               | 6 | 0.9398 | 0.7420 | 1.1902 | 0.6282 | 0.0251  | 0.0441 | 0.6002 | 1.1189 | 0.8913 | 90.5430  |
| genus. Oxalobacter. id. 2978    | CardioEmbolicStroke | Weighted mode             | 6 | 0.9457 | 0.7586 | 1.1790 | 0.6407 | 0.0251  | 0.0441 | 0.6002 | 1.1189 | 0.8913 | 90.5430  |

|                                 |                     |                           |   |        |        |        |        |         |        |        |        |        |         |
|---------------------------------|---------------------|---------------------------|---|--------|--------|--------|--------|---------|--------|--------|--------|--------|---------|
| genus. Oxalobacter. id. 2978    | IschemicStroke      | MR Egger                  | 6 | 1.0404 | 0.7622 | 1.4203 | 0.8152 | -0.0122 | 0.0229 | 0.6211 | 5.6924 | 0.2233 | 92.7348 |
| genus. Oxalobacter. id. 2978    | IschemicStroke      | Weighted median           | 6 | 0.9586 | 0.8932 | 1.0288 | 0.2413 | -0.0122 | 0.0229 | 0.6211 | 5.6924 | 0.2233 | 92.7348 |
| genus. Oxalobacter. id. 2978    | IschemicStroke      | Inverse variance weighted | 6 | 0.9577 | 0.8992 | 1.0199 | 0.1784 | -0.0122 | 0.0229 | 0.6211 | 5.6924 | 0.2233 | 92.7348 |
| genus. Oxalobacter. id. 2978    | IschemicStroke      | Simple mode               | 6 | 0.9573 | 0.8552 | 1.0717 | 0.4831 | -0.0122 | 0.0229 | 0.6211 | 5.6924 | 0.2233 | 92.7348 |
| genus. Oxalobacter. id. 2978    | IschemicStroke      | Weighted mode             | 6 | 0.9526 | 0.8605 | 1.0545 | 0.3918 | -0.0122 | 0.0229 | 0.6211 | 5.6924 | 0.2233 | 92.7348 |
| genus. Oxalobacter. id. 2978    | LargeArteryStroke   | MR Egger                  | 6 | 0.4653 | 0.1997 | 1.0843 | 0.1510 | 0.1098  | 0.0618 | 0.1504 | 7.6839 | 0.1745 | 21.9973 |
| genus. Oxalobacter. id. 2978    | LargeArteryStroke   | Weighted median           | 6 | 0.9840 | 0.7734 | 1.2520 | 0.8959 | 0.1098  | 0.0618 | 0.1504 | 7.6839 | 0.1745 | 21.9973 |
| genus. Oxalobacter. id. 2978    | LargeArteryStroke   | Inverse variance weighted | 6 | 0.9833 | 0.7894 | 1.2247 | 0.8802 | 0.1098  | 0.0618 | 0.1504 | 7.6839 | 0.1745 | 21.9973 |
| genus. Oxalobacter. id. 2978    | LargeArteryStroke   | Simple mode               | 6 | 0.9835 | 0.6750 | 1.4330 | 0.9345 | 0.1098  | 0.0618 | 0.1504 | 7.6839 | 0.1745 | 21.9973 |
| genus. Oxalobacter. id. 2978    | LargeArteryStroke   | Weighted mode             | 6 | 0.9934 | 0.6792 | 1.4528 | 0.9739 | 0.1098  | 0.0618 | 0.1504 | 7.6839 | 0.1745 | 21.9973 |
| genus. Oxalobacter. id. 2978    | SmallVesselStroke   | MR Egger                  | 6 | 1.3286 | 0.5312 | 3.3228 | 0.5764 | -0.0640 | 0.0671 | 0.3940 | 7.3440 | 0.1963 | 18.9834 |
| genus. Oxalobacter. id. 2978    | SmallVesselStroke   | Weighted median           | 6 | 0.8108 | 0.6548 | 1.0040 | 0.0545 | -0.0640 | 0.0671 | 0.3940 | 7.3440 | 0.1963 | 18.9834 |
| genus. Oxalobacter. id. 2978    | SmallVesselStroke   | Inverse variance weighted | 6 | 0.8594 | 0.7056 | 1.0467 | 0.1321 | -0.0640 | 0.0671 | 0.3940 | 7.3440 | 0.1963 | 18.9834 |
| genus. Oxalobacter. id. 2978    | SmallVesselStroke   | Simple mode               | 6 | 0.8107 | 0.6058 | 1.0848 | 0.2169 | -0.0640 | 0.0671 | 0.3940 | 7.3440 | 0.1963 | 18.9834 |
| genus. Oxalobacter. id. 2978    | SmallVesselStroke   | Weighted mode             | 6 | 0.8092 | 0.6058 | 1.0808 | 0.2111 | -0.0640 | 0.0671 | 0.3940 | 7.3440 | 0.1963 | 18.9834 |
| genus. Oxalobacter. id. 2978    | Stroke              | MR Egger                  | 6 | 0.9833 | 0.7121 | 1.3577 | 0.9234 | -0.0024 | 0.0237 | 0.9246 | 7.1955 | 0.1259 | 94.5934 |
| genus. Oxalobacter. id. 2978    | Stroke              | Weighted median           | 6 | 0.9891 | 0.9270 | 1.0554 | 0.7402 | -0.0024 | 0.0237 | 0.9246 | 7.1955 | 0.1259 | 94.5934 |
| genus. Oxalobacter. id. 2978    | Stroke              | Inverse variance weighted | 6 | 0.9675 | 0.9082 | 1.0307 | 0.3061 | -0.0024 | 0.0237 | 0.9246 | 7.1955 | 0.1259 | 94.5934 |
| genus. Oxalobacter. id. 2978    | Stroke              | Simple mode               | 6 | 0.9989 | 0.9084 | 1.0984 | 0.9832 | -0.0024 | 0.0237 | 0.9246 | 7.1955 | 0.1259 | 94.5934 |
| genus. Oxalobacter. id. 2978    | Stroke              | Weighted mode             | 6 | 0.9972 | 0.9159 | 1.0857 | 0.9502 | -0.0024 | 0.0237 | 0.9246 | 7.1955 | 0.1259 | 94.5934 |
| genus. Paraprevotella. id. 962  | CardioEmbolicStroke | Inverse variance weighted | 2 | 0.8851 | 0.6603 | 1.1866 | 0.4146 | NA      | NA     | NA     | 0.0003 | 0.9862 | 25.0164 |
| genus. Paraprevotella. id. 962  | IschemicStroke      | Inverse variance weighted | 2 | 1.0126 | 0.8900 | 1.1520 | 0.8493 | NA      | NA     | NA     | 0.4145 | 0.5197 | 67.3843 |
| genus. Paraprevotella. id. 962  | LargeArteryStroke   | Inverse variance weighted | 2 | 1.1438 | 0.7280 | 1.7973 | 0.5600 | NA      | NA     | NA     | 1.3006 | 0.2541 | 6.3841  |
| genus. Paraprevotella. id. 962  | SmallVesselStroke   | Inverse variance weighted | 2 | 1.0858 | 0.7504 | 1.5711 | 0.6624 | NA      | NA     | NA     | 0.9067 | 0.3410 | 10.2368 |
| genus. Paraprevotella. id. 962  | Stroke              | Inverse variance weighted | 2 | 1.0235 | 0.9078 | 1.1538 | 0.7046 | NA      | NA     | NA     | 0.6342 | 0.4258 | 52.3367 |
| genus. Parasutterella. id. 2892 | CardioEmbolicStroke | MR Egger                  | 5 | 0.6658 | 0.2871 | 1.5437 | 0.4130 | 0.0228  | 0.0334 | 0.5448 | 1.5461 | 0.6717 | 11.2773 |
| genus. Parasutterella. id. 2892 | CardioEmbolicStroke | Weighted median           | 5 | 0.9594 | 0.7099 | 1.2964 | 0.7871 | 0.0228  | 0.0334 | 0.5448 | 1.5461 | 0.6717 | 11.2773 |
| genus. Parasutterella. id. 2892 | CardioEmbolicStroke | Inverse variance weighted | 5 | 0.8813 | 0.6965 | 1.1151 | 0.2926 | 0.0228  | 0.0334 | 0.5448 | 1.5461 | 0.6717 | 11.2773 |
| genus. Parasutterella. id. 2892 | CardioEmbolicStroke | Simple mode               | 5 | 1.0130 | 0.6780 | 1.5134 | 0.9528 | 0.0228  | 0.0334 | 0.5448 | 1.5461 | 0.6717 | 11.2773 |
| genus. Parasutterella. id. 2892 | CardioEmbolicStroke | Weighted mode             | 5 | 1.0090 | 0.6871 | 1.4816 | 0.9658 | 0.0228  | 0.0334 | 0.5448 | 1.5461 | 0.6717 | 11.2773 |
| genus. Parasutterella. id. 2892 | IschemicStroke      | MR Egger                  | 5 | 1.1724 | 0.8002 | 1.7177 | 0.4742 | -0.0090 | 0.0151 | 0.5925 | 1.6768 | 0.6421 | 45.1425 |
| genus. Parasutterella. id. 2892 | IschemicStroke      | Weighted median           | 5 | 1.0228 | 0.8902 | 1.1751 | 0.7504 | -0.0090 | 0.0151 | 0.5925 | 1.6768 | 0.6421 | 45.1425 |
| genus. Parasutterella. id. 2892 | IschemicStroke      | Inverse variance weighted | 5 | 1.0481 | 0.9451 | 1.1624 | 0.3734 | -0.0090 | 0.0151 | 0.5925 | 1.6768 | 0.6421 | 45.1425 |
| genus. Parasutterella. id. 2892 | IschemicStroke      | Simple mode               | 5 | 1.0258 | 0.8509 | 1.2366 | 0.8026 | -0.0090 | 0.0151 | 0.5925 | 1.6768 | 0.6421 | 45.1425 |
| genus. Parasutterella. id. 2892 | IschemicStroke      | Weighted mode             | 5 | 1.0268 | 0.8623 | 1.2228 | 0.7813 | -0.0090 | 0.0151 | 0.5925 | 1.6768 | 0.6421 | 45.1425 |
| genus. Parasutterella. id. 2892 | LargeArteryStroke   | MR Egger                  | 5 | 0.7249 | 0.2088 | 2.5160 | 0.6472 | 0.0600  | 0.0491 | 0.3091 | 5.4769 | 0.2418 | 3.8426  |
| genus. Parasutterella. id. 2892 | LargeArteryStroke   | Weighted median           | 5 | 1.3765 | 0.8893 | 2.1307 | 0.1516 | 0.0600  | 0.0491 | 0.3091 | 5.4769 | 0.2418 | 3.8426  |
| genus. Parasutterella. id. 2892 | LargeArteryStroke   | Inverse variance weighted | 5 | 1.5257 | 1.0528 | 2.2110 | 0.0256 | 0.0600  | 0.0491 | 0.3091 | 5.4769 | 0.2418 | 3.8426  |
| genus. Parasutterella. id. 2892 | LargeArteryStroke   | Simple mode               | 5 | 1.3581 | 0.6927 | 2.6627 | 0.4232 | 0.0600  | 0.0491 | 0.3091 | 5.4769 | 0.2418 | 3.8426  |
| genus. Parasutterella. id. 2892 | LargeArteryStroke   | Weighted mode             | 5 | 1.2824 | 0.6788 | 2.4227 | 0.4862 | 0.0600  | 0.0491 | 0.3091 | 5.4769 | 0.2418 | 3.8426  |
| genus. Parasutterella. id. 2892 | SmallVesselStroke   | MR Egger                  | 5 | 1.3384 | 0.4609 | 3.8870 | 0.6292 | -0.0378 | 0.0421 | 0.4362 | 1.7793 | 0.6194 | 16.9402 |
| genus. Parasutterella. id. 2892 | SmallVesselStroke   | Weighted median           | 5 | 0.9376 | 0.6426 | 1.3681 | 0.7382 | -0.0378 | 0.0421 | 0.4362 | 1.7793 | 0.6194 | 16.9402 |
| genus. Parasutterella. id. 2892 | SmallVesselStroke   | Inverse variance weighted | 5 | 0.8379 | 0.6231 | 1.1268 | 0.2420 | -0.0378 | 0.0421 | 0.4362 | 1.7793 | 0.6194 | 16.9402 |
| genus. Parasutterella. id. 2892 | SmallVesselStroke   | Simple mode               | 5 | 0.9644 | 0.5861 | 1.5867 | 0.8934 | -0.0378 | 0.0421 | 0.4362 | 1.7793 | 0.6194 | 16.9402 |
| genus. Parasutterella. id. 2892 | SmallVesselStroke   | Weighted mode             | 5 | 0.9762 | 0.5928 | 1.6075 | 0.9292 | -0.0378 | 0.0421 | 0.4362 | 1.7793 | 0.6194 | 16.9402 |
| genus. Parasutterella. id. 2892 | Stroke              | MR Egger                  | 5 | 1.0398 | 0.7369 | 1.4671 | 0.8386 | 0.0004  | 0.0137 | 0.9768 | 1.0928 | 0.7788 | 79.9977 |
| genus. Parasutterella. id. 2892 | Stroke              | Weighted median           | 5 | 1.0383 | 0.9199 | 1.1720 | 0.5426 | 0.0004  | 0.0137 | 0.9768 | 1.0928 | 0.7788 | 79.9977 |
| genus. Parasutterella. id. 2892 | Stroke              | Inverse variance weighted | 5 | 1.0453 | 0.9518 | 1.1480 | 0.3537 | 0.0004  | 0.0137 | 0.9768 | 1.0928 | 0.7788 | 79.9977 |
| genus. Parasutterella. id. 2892 | Stroke              | Simple mode               | 5 | 1.0135 | 0.8765 | 1.1719 | 0.8653 | 0.0004  | 0.0137 | 0.9768 | 1.0928 | 0.7788 | 79.9977 |
| genus. Parasutterella. id. 2892 | Stroke              | Weighted mode             | 5 | 1.0170 | 0.8713 | 1.1872 | 0.8410 | 0.0004  | 0.0137 | 0.9768 | 1.0928 | 0.7788 | 79.9977 |
| genus. Peptococcus. id. 2037    | CardioEmbolicStroke | MR Egger                  | 6 | 1.0381 | 0.5511 | 1.9555 | 0.9133 | -0.0087 | 0.0408 | 0.8417 | 1.1779 | 0.8817 | 60.3574 |
| genus. Peptococcus. id. 2037    | CardioEmbolicStroke | Weighted median           | 6 | 0.9500 | 0.7873 | 1.1464 | 0.5928 | -0.0087 | 0.0408 | 0.8417 | 1.1779 | 0.8817 | 60.3574 |
| genus. Peptococcus. id. 2037    | CardioEmbolicStroke | Inverse variance weighted | 6 | 0.9710 | 0.8356 | 1.1284 | 0.7011 | -0.0087 | 0.0408 | 0.8417 | 1.1779 | 0.8817 | 60.3574 |
| genus. Peptococcus. id. 2037    | CardioEmbolicStroke | Simple mode               | 6 | 0.9466 | 0.7306 | 1.2265 | 0.6954 | -0.0087 | 0.0408 | 0.8417 | 1.1779 | 0.8817 | 60.3574 |

|                                            |                     |                           |   |        |        |         |        |         |        |        |        |        |          |
|--------------------------------------------|---------------------|---------------------------|---|--------|--------|---------|--------|---------|--------|--------|--------|--------|----------|
| genus. Peptococcus. id. 2037               | CardioEmbolicStroke | Weighted mode             | 6 | 0.9466 | 0.7279 | 1.2311  | 0.6994 | -0.0087 | 0.0408 | 0.8417 | 1.1779 | 0.8817 | 60.3574  |
| genus. Peptococcus. id. 2037               | IschemicStroke      | MR Egger                  | 6 | 0.9962 | 0.7594 | 1.3070  | 0.9796 | 0.0007  | 0.0177 | 0.9721 | 1.3597 | 0.8512 | 192.2997 |
| genus. Peptococcus. id. 2037               | IschemicStroke      | Weighted median           | 6 | 1.0086 | 0.9311 | 1.0926  | 0.8330 | 0.0007  | 0.0177 | 0.9721 | 1.3597 | 0.8512 | 192.2997 |
| genus. Peptococcus. id. 2037               | IschemicStroke      | Inverse variance weighted | 6 | 1.0012 | 0.9383 | 1.0684  | 0.9700 | 0.0007  | 0.0177 | 0.9721 | 1.3597 | 0.8512 | 192.2997 |
| genus. Peptococcus. id. 2037               | IschemicStroke      | Simple mode               | 6 | 1.0197 | 0.9064 | 1.1470  | 0.7589 | 0.0007  | 0.0177 | 0.9721 | 1.3597 | 0.8512 | 192.2997 |
| genus. Peptococcus. id. 2037               | IschemicStroke      | Weighted mode             | 6 | 1.0171 | 0.9129 | 1.1333  | 0.7705 | 0.0007  | 0.0177 | 0.9721 | 1.3597 | 0.8512 | 192.2997 |
| genus. Peptococcus. id. 2037               | LargeArteryStroke   | MR Egger                  | 6 | 1.0677 | 0.4477 | 2.5464  | 0.8896 | -0.0111 | 0.0557 | 0.8525 | 1.5069 | 0.8254 | 35.0646  |
| genus. Peptococcus. id. 2037               | LargeArteryStroke   | Weighted median           | 6 | 0.9723 | 0.7631 | 1.2388  | 0.8201 | -0.0111 | 0.0557 | 0.8525 | 1.5069 | 0.8254 | 35.0646  |
| genus. Peptococcus. id. 2037               | LargeArteryStroke   | Inverse variance weighted | 6 | 0.9802 | 0.8000 | 1.2011  | 0.8474 | -0.0111 | 0.0557 | 0.8525 | 1.5069 | 0.8254 | 35.0646  |
| genus. Peptococcus. id. 2037               | LargeArteryStroke   | Simple mode               | 6 | 0.9616 | 0.6949 | 1.3307  | 0.8228 | -0.0111 | 0.0557 | 0.8525 | 1.5069 | 0.8254 | 35.0646  |
| genus. Peptococcus. id. 2037               | LargeArteryStroke   | Weighted mode             | 6 | 0.9490 | 0.6818 | 1.3209  | 0.7687 | -0.0111 | 0.0557 | 0.8525 | 1.5069 | 0.8254 | 35.0646  |
| genus. Peptococcus. id. 2037               | SmallVesselStroke   | MR Egger                  | 6 | 0.7957 | 0.2743 | 2.3080  | 0.6957 | 0.0265  | 0.0683 | 0.7182 | 7.2188 | 0.1248 | 14.4574  |
| genus. Peptococcus. id. 2037               | SmallVesselStroke   | Weighted median           | 6 | 0.9702 | 0.7670 | 1.2273  | 0.8008 | 0.0265  | 0.0683 | 0.7182 | 7.2188 | 0.1248 | 14.4574  |
| genus. Peptococcus. id. 2037               | SmallVesselStroke   | Inverse variance weighted | 6 | 0.9764 | 0.7767 | 1.2273  | 0.8376 | 0.0265  | 0.0683 | 0.7182 | 7.2188 | 0.1248 | 14.4574  |
| genus. Peptococcus. id. 2037               | SmallVesselStroke   | Simple mode               | 6 | 0.8130 | 0.5314 | 1.2438  | 0.3837 | 0.0265  | 0.0683 | 0.7182 | 7.2188 | 0.1248 | 14.4574  |
| genus. Peptococcus. id. 2037               | SmallVesselStroke   | Weighted mode             | 6 | 0.8477 | 0.5647 | 1.2727  | 0.4617 | 0.0265  | 0.0683 | 0.7182 | 7.2188 | 0.1248 | 14.4574  |
| genus. Peptococcus. id. 2037               | Stroke              | MR Egger                  | 6 | 0.9901 | 0.7699 | 1.2733  | 0.9421 | -0.0011 | 0.0164 | 0.9519 | 1.8893 | 0.7561 | 192.3105 |
| genus. Peptococcus. id. 2037               | Stroke              | Weighted median           | 6 | 0.9768 | 0.9082 | 1.0504  | 0.5262 | -0.0011 | 0.0164 | 0.9519 | 1.8893 | 0.7561 | 192.3105 |
| genus. Peptococcus. id. 2037               | Stroke              | Inverse variance weighted | 6 | 0.9822 | 0.9251 | 1.0429  | 0.5577 | -0.0011 | 0.0164 | 0.9519 | 1.8893 | 0.7561 | 192.3105 |
| genus. Peptococcus. id. 2037               | Stroke              | Simple mode               | 6 | 0.9675 | 0.8733 | 1.0720  | 0.5555 | -0.0011 | 0.0164 | 0.9519 | 1.8893 | 0.7561 | 192.3105 |
| genus. Peptococcus. id. 2037               | Stroke              | Weighted mode             | 6 | 0.9632 | 0.8659 | 1.0714  | 0.5203 | -0.0011 | 0.0164 | 0.9519 | 1.8893 | 0.7561 | 192.3105 |
| genus. Prevotella7. id. 11182              | CardioEmbolicStroke | MR Egger                  | 3 | 0.7021 | 0.3198 | 1.5413  | 0.5400 | 0.0495  | 0.0591 | 0.5557 | 1.3456 | 0.2461 | 31.6029  |
| genus. Prevotella7. id. 11182              | CardioEmbolicStroke | Weighted median           | 3 | 0.9844 | 0.7839 | 1.2361  | 0.8922 | 0.0495  | 0.0591 | 0.5557 | 1.3456 | 0.2461 | 31.6029  |
| genus. Prevotella7. id. 11182              | CardioEmbolicStroke | Inverse variance weighted | 3 | 0.9726 | 0.8119 | 1.1651  | 0.7630 | 0.0495  | 0.0591 | 0.5557 | 1.3456 | 0.2461 | 31.6029  |
| genus. Prevotella7. id. 11182              | CardioEmbolicStroke | Simple mode               | 3 | 1.0106 | 0.7460 | 1.3692  | 0.9518 | 0.0495  | 0.0591 | 0.5557 | 1.3456 | 0.2461 | 31.6029  |
| genus. Prevotella7. id. 11182              | CardioEmbolicStroke | Weighted mode             | 3 | 1.0204 | 0.7591 | 1.3715  | 0.9060 | 0.0495  | 0.0591 | 0.5557 | 1.3456 | 0.2461 | 31.6029  |
| genus. Prevotella7. id. 11182              | IschemicStroke      | MR Egger                  | 3 | 0.7179 | 0.5375 | 0.9588  | 0.2668 | 0.0513  | 0.0220 | 0.2581 | 5.4472 | 0.0656 | 61.2085  |
| genus. Prevotella7. id. 11182              | IschemicStroke      | Weighted median           | 3 | 1.0119 | 0.9068 | 1.1292  | 0.8325 | 0.0513  | 0.0220 | 0.2581 | 5.4472 | 0.0656 | 61.2085  |
| genus. Prevotella7. id. 11182              | IschemicStroke      | Inverse variance weighted | 3 | 1.0012 | 0.8869 | 1.1304  | 0.9841 | 0.0513  | 0.0220 | 0.2581 | 5.4472 | 0.0656 | 61.2085  |
| genus. Prevotella7. id. 11182              | IschemicStroke      | Simple mode               | 3 | 1.0562 | 0.9140 | 1.2204  | 0.5359 | 0.0513  | 0.0220 | 0.2581 | 5.4472 | 0.0656 | 61.2085  |
| genus. Prevotella7. id. 11182              | IschemicStroke      | Weighted mode             | 3 | 1.0369 | 0.8878 | 1.2110  | 0.6926 | 0.0513  | 0.0220 | 0.2581 | 5.4472 | 0.0656 | 61.2085  |
| genus. Prevotella7. id. 11182              | LargeArteryStroke   | MR Egger                  | 3 | 0.4049 | 0.1255 | 1.3063  | 0.3718 | 0.1241  | 0.0881 | 0.3930 | 4.8480 | 0.0886 | 10.5694  |
| genus. Prevotella7. id. 11182              | LargeArteryStroke   | Weighted median           | 3 | 1.0468 | 0.7509 | 1.4592  | 0.7873 | 0.1241  | 0.0881 | 0.3930 | 4.8480 | 0.0886 | 10.5694  |
| genus. Prevotella7. id. 11182              | LargeArteryStroke   | Inverse variance weighted | 3 | 0.9148 | 0.6397 | 1.3083  | 0.6257 | 0.1241  | 0.0881 | 0.3930 | 4.8480 | 0.0886 | 10.5694  |
| genus. Prevotella7. id. 11182              | LargeArteryStroke   | Simple mode               | 3 | 1.1052 | 0.7406 | 1.6494  | 0.6728 | 0.1241  | 0.0881 | 0.3930 | 4.8480 | 0.0886 | 10.5694  |
| genus. Prevotella7. id. 11182              | LargeArteryStroke   | Weighted mode             | 3 | 1.1111 | 0.7326 | 1.6853  | 0.6691 | 0.1241  | 0.0881 | 0.3930 | 4.8480 | 0.0886 | 10.5694  |
| genus. Prevotella7. id. 11182              | SmallVesselStroke   | MR Egger                  | 3 | 0.7045 | 0.2767 | 1.7934  | 0.5966 | 0.0557  | 0.0698 | 0.5709 | 1.1350 | 0.2867 | 44.7275  |
| genus. Prevotella7. id. 11182              | SmallVesselStroke   | Weighted median           | 3 | 0.9624 | 0.7251 | 1.2774  | 0.7907 | 0.0557  | 0.0698 | 0.5709 | 1.1350 | 0.2867 | 44.7275  |
| genus. Prevotella7. id. 11182              | SmallVesselStroke   | Inverse variance weighted | 3 | 1.0190 | 0.8216 | 1.2639  | 0.8638 | 0.0557  | 0.0698 | 0.5709 | 1.1350 | 0.2867 | 44.7275  |
| genus. Prevotella7. id. 11182              | SmallVesselStroke   | Simple mode               | 3 | 0.9304 | 0.6673 | 1.2973  | 0.7120 | 0.0557  | 0.0698 | 0.5709 | 1.1350 | 0.2867 | 44.7275  |
| genus. Prevotella7. id. 11182              | SmallVesselStroke   | Weighted mode             | 3 | 0.9287 | 0.6936 | 1.2434  | 0.6685 | 0.0557  | 0.0698 | 0.5709 | 1.1350 | 0.2867 | 44.7275  |
| genus. Prevotella7. id. 11182              | Stroke              | MR Egger                  | 3 | 0.7470 | 0.5710 | 0.9771  | 0.2795 | 0.0454  | 0.0205 | 0.2697 | 5.0242 | 0.0811 | 69.3382  |
| genus. Prevotella7. id. 11182              | Stroke              | Weighted median           | 3 | 1.0191 | 0.9264 | 1.1210  | 0.6972 | 0.0454  | 0.0205 | 0.2697 | 5.0242 | 0.0811 | 69.3382  |
| genus. Prevotella7. id. 11182              | Stroke              | Inverse variance weighted | 3 | 1.0023 | 0.9007 | 1.1153  | 0.9667 | 0.0454  | 0.0205 | 0.2697 | 5.0242 | 0.0811 | 69.3382  |
| genus. Prevotella7. id. 11182              | Stroke              | Simple mode               | 3 | 1.0637 | 0.9305 | 1.2161  | 0.4611 | 0.0454  | 0.0205 | 0.2697 | 5.0242 | 0.0811 | 69.3382  |
| genus. Prevotella7. id. 11182              | Stroke              | Weighted mode             | 3 | 1.0560 | 0.9298 | 1.1993  | 0.4896 | 0.0454  | 0.0205 | 0.2697 | 5.0242 | 0.0811 | 69.3382  |
| genus. RikenellaceaeRC9gutgroup. id. 11191 | CardioEmbolicStroke | MR Egger                  | 4 | 1.3648 | 0.1775 | 10.4934 | 0.7933 | -0.0277 | 0.1260 | 0.8463 | 4.7948 | 0.0910 | 21.5410  |
| genus. RikenellaceaeRC9gutgroup. id. 11191 | CardioEmbolicStroke | Weighted median           | 4 | 1.0129 | 0.8452 | 1.2139  | 0.8896 | -0.0277 | 0.1260 | 0.8463 | 4.7948 | 0.0910 | 21.5410  |
| genus. RikenellaceaeRC9gutgroup. id. 11191 | CardioEmbolicStroke | Inverse variance weighted | 4 | 1.0871 | 0.8995 | 1.3137  | 0.3876 | -0.0277 | 0.1260 | 0.8463 | 4.7948 | 0.0910 | 21.5410  |
| genus. RikenellaceaeRC9gutgroup. id. 11191 | CardioEmbolicStroke | Simple mode               | 4 | 0.9701 | 0.7553 | 1.2460  | 0.8277 | -0.0277 | 0.1260 | 0.8463 | 4.7948 | 0.0910 | 21.5410  |
| genus. RikenellaceaeRC9gutgroup. id. 11191 | CardioEmbolicStroke | Weighted mode             | 4 | 0.9719 | 0.7751 | 1.2187  | 0.8211 | -0.0277 | 0.1260 | 0.8463 | 4.7948 | 0.0910 | 21.5410  |
| genus. RikenellaceaeRC9gutgroup. id. 11191 | IschemicStroke      | MR Egger                  | 4 | 0.8034 | 0.4396 | 1.4683  | 0.5506 | 0.0239  | 0.0371 | 0.5848 | 1.6501 | 0.4382 | 91.5437  |
| genus. RikenellaceaeRC9gutgroup. id. 11191 | IschemicStroke      | Weighted median           | 4 | 0.9628 | 0.8901 | 1.0415  | 0.3448 | 0.0239  | 0.0371 | 0.5848 | 1.6501 | 0.4382 | 91.5437  |
| genus. RikenellaceaeRC9gutgroup. id. 11191 | IschemicStroke      | Inverse variance weighted | 4 | 0.9787 | 0.9162 | 1.0455  | 0.5231 | 0.0239  | 0.0371 | 0.5848 | 1.6501 | 0.4382 | 91.5437  |

|                                            |                     |                           |   |        |        |        |           |         |        |        |        |        |         |
|--------------------------------------------|---------------------|---------------------------|---|--------|--------|--------|-----------|---------|--------|--------|--------|--------|---------|
| genus. RikenellaceaeRC9gutgroup. id. 11191 | IschemicStroke      | Simple mode               | 4 | 0.9564 | 0.8588 | 1.0650 | 0.4760    | 0.0239  | 0.0371 | 0.5848 | 1.6501 | 0.4382 | 91.5437 |
| genus. RikenellaceaeRC9gutgroup. id. 11191 | IschemicStroke      | Weighted mode             | 4 | 0.9573 | 0.8609 | 1.0644 | 0.4787    | 0.0239  | 0.0371 | 0.5848 | 1.6501 | 0.4382 | 91.5437 |
| genus. RikenellaceaeRC9gutgroup. id. 11191 | LargeArteryStroke   | MR Egger                  | 4 | 0.4085 | 0.0739 | 2.2574 | 0.4126    | 0.0981  | 0.1059 | 0.4519 | 1.2253 | 0.7469 | 26.1664 |
| genus. RikenellaceaeRC9gutgroup. id. 11191 | LargeArteryStroke   | Weighted median           | 4 | 0.9314 | 0.7389 | 1.1741 | 0.5475    | 0.0981  | 0.1059 | 0.4519 | 1.2253 | 0.7469 | 26.1664 |
| genus. RikenellaceaeRC9gutgroup. id. 11191 | LargeArteryStroke   | Inverse variance weighted | 4 | 0.9118 | 0.7497 | 1.1090 | 0.3553    | 0.0981  | 0.1059 | 0.4519 | 1.2253 | 0.7469 | 26.1664 |
| genus. RikenellaceaeRC9gutgroup. id. 11191 | LargeArteryStroke   | Simple mode               | 4 | 0.9501 | 0.6798 | 1.3277 | 0.7837    | 0.0981  | 0.1059 | 0.4519 | 1.2253 | 0.7469 | 26.1664 |
| genus. RikenellaceaeRC9gutgroup. id. 11191 | LargeArteryStroke   | Weighted mode             | 4 | 0.9459 | 0.6841 | 1.3080 | 0.7588    | 0.0981  | 0.1059 | 0.4519 | 1.2253 | 0.7469 | 26.1664 |
| genus. RikenellaceaeRC9gutgroup. id. 11191 | SmallVesselStroke   | MR Egger                  | 4 | 0.1580 | 0.0309 | 0.8092 | 0.1572    | 0.2239  | 0.1008 | 0.1565 | 5.8619 | 0.1185 | 14.2772 |
| genus. RikenellaceaeRC9gutgroup. id. 11191 | SmallVesselStroke   | Weighted median           | 4 | 1.0794 | 0.8599 | 1.3549 | 0.5101    | 0.2239  | 0.1008 | 0.1565 | 5.8619 | 0.1185 | 14.2772 |
| genus. RikenellaceaeRC9gutgroup. id. 11191 | SmallVesselStroke   | Inverse variance weighted | 4 | 0.9940 | 0.7695 | 1.2839 | 0.9632    | 0.2239  | 0.1008 | 0.1565 | 5.8619 | 0.1185 | 14.2772 |
| genus. RikenellaceaeRC9gutgroup. id. 11191 | SmallVesselStroke   | Simple mode               | 4 | 1.1690 | 0.8196 | 1.6673 | 0.4521    | 0.2239  | 0.1008 | 0.1565 | 5.8619 | 0.1185 | 14.2772 |
| genus. RikenellaceaeRC9gutgroup. id. 11191 | SmallVesselStroke   | Weighted mode             | 4 | 1.1579 | 0.8102 | 1.6547 | 0.4798    | 0.2239  | 0.1008 | 0.1565 | 5.8619 | 0.1185 | 14.2772 |
| genus. RikenellaceaeRC9gutgroup. id. 11191 | Stroke              | MR Egger                  | 4 | 0.7012 | 0.3157 | 1.5572 | 0.4752    | 0.0390  | 0.0490 | 0.5089 | 4.0900 | 0.1294 | 57.0102 |
| genus. RikenellaceaeRC9gutgroup. id. 11191 | Stroke              | Weighted median           | 4 | 0.9491 | 0.8818 | 1.0215 | 0.1640    | 0.0390  | 0.0490 | 0.5089 | 4.0900 | 0.1294 | 57.0102 |
| genus. RikenellaceaeRC9gutgroup. id. 11191 | Stroke              | Inverse variance weighted | 4 | 0.9682 | 0.8931 | 1.0497 | 0.4334    | 0.0390  | 0.0490 | 0.5089 | 4.0900 | 0.1294 | 57.0102 |
| genus. RikenellaceaeRC9gutgroup. id. 11191 | Stroke              | Simple mode               | 4 | 0.9382 | 0.8375 | 1.0511 | 0.3517    | 0.0390  | 0.0490 | 0.5089 | 4.0900 | 0.1294 | 57.0102 |
| genus. RikenellaceaeRC9gutgroup. id. 11191 | Stroke              | Weighted mode             | 4 | 0.9411 | 0.8486 | 1.0438 | 0.3339    | 0.0390  | 0.0490 | 0.5089 | 4.0900 | 0.1294 | 57.0102 |
| genus. Romboutsia. id. 11347               | CardioEmbolicStroke | Inverse variance weighted | 2 | 1.1385 | 0.7853 | 1.6505 | 0.4936 NA | NA      | NA     | NA     | 0.0070 | 0.9333 | 18.6989 |
| genus. Romboutsia. id. 11347               | IschemicStroke      | Inverse variance weighted | 2 | 0.9212 | 0.7821 | 1.0851 | 0.3260 NA | NA      | NA     | NA     | 0.2988 | 0.5846 | 32.0335 |
| genus. Romboutsia. id. 11347               | LargeArteryStroke   | Inverse variance weighted | 2 | 0.8136 | 0.4952 | 1.3366 | 0.4154 NA | NA      | NA     | NA     | 0.4837 | 0.4868 | 8.9944  |
| genus. Romboutsia. id. 11347               | SmallVesselStroke   | Inverse variance weighted | 2 | 0.7213 | 0.4549 | 1.1437 | 0.1648 NA | NA      | NA     | NA     | 0.0029 | 0.9570 | 6.1092  |
| genus. Romboutsia. id. 11347               | Stroke              | Inverse variance weighted | 2 | 0.9481 | 0.8150 | 1.1030 | 0.4903 NA | NA      | NA     | NA     | 0.2320 | 0.6301 | 48.7678 |
| genus. Ruminiclostridium5. id. 11355       | CardioEmbolicStroke | MR Egger                  | 5 | 1.2698 | 0.3972 | 4.0594 | 0.7140    | -0.0235 | 0.0365 | 0.5652 | 1.4428 | 0.6955 | 12.9590 |
| genus. Ruminiclostridium5. id. 11355       | CardioEmbolicStroke | Weighted median           | 5 | 0.8604 | 0.6037 | 1.2264 | 0.4057    | -0.0235 | 0.0365 | 0.5652 | 1.4428 | 0.6955 | 12.9590 |
| genus. Ruminiclostridium5. id. 11355       | CardioEmbolicStroke | Inverse variance weighted | 5 | 0.8763 | 0.6633 | 1.1577 | 0.3527    | -0.0235 | 0.0365 | 0.5652 | 1.4428 | 0.6955 | 12.9590 |
| genus. Ruminiclostridium5. id. 11355       | CardioEmbolicStroke | Simple mode               | 5 | 0.8629 | 0.5391 | 1.3811 | 0.5720    | -0.0235 | 0.0365 | 0.5652 | 1.4428 | 0.6955 | 12.9590 |
| genus. Ruminiclostridium5. id. 11355       | CardioEmbolicStroke | Weighted mode             | 5 | 0.8629 | 0.5582 | 1.3339 | 0.5432    | -0.0235 | 0.0365 | 0.5652 | 1.4428 | 0.6955 | 12.9590 |
| genus. Ruminiclostridium5. id. 11355       | IschemicStroke      | MR Egger                  | 5 | 1.1302 | 0.5434 | 2.3508 | 0.7647    | -0.0068 | 0.0228 | 0.7853 | 5.6635 | 0.1292 | 25.4112 |
| genus. Ruminiclostridium5. id. 11355       | IschemicStroke      | Weighted median           | 5 | 0.9853 | 0.8297 | 1.1701 | 0.8660    | -0.0068 | 0.0228 | 0.7853 | 5.6635 | 0.1292 | 25.4112 |
| genus. Ruminiclostridium5. id. 11355       | IschemicStroke      | Inverse variance weighted | 5 | 1.0143 | 0.8732 | 1.1783 | 0.8525    | -0.0068 | 0.0228 | 0.7853 | 5.6635 | 0.1292 | 25.4112 |
| genus. Ruminiclostridium5. id. 11355       | IschemicStroke      | Simple mode               | 5 | 0.9305 | 0.7380 | 1.1731 | 0.5751    | -0.0068 | 0.0228 | 0.7853 | 5.6635 | 0.1292 | 25.4112 |
| genus. Ruminiclostridium5. id. 11355       | IschemicStroke      | Weighted mode             | 5 | 0.9445 | 0.7438 | 1.1993 | 0.6637    | -0.0068 | 0.0228 | 0.7853 | 5.6635 | 0.1292 | 25.4112 |
| genus. Ruminiclostridium5. id. 11355       | LargeArteryStroke   | MR Egger                  | 5 | 0.8390 | 0.1652 | 4.2599 | 0.8459    | 0.0083  | 0.0503 | 0.8799 | 2.0784 | 0.5563 | 7.1362  |
| genus. Ruminiclostridium5. id. 11355       | LargeArteryStroke   | Weighted median           | 5 | 1.0990 | 0.6794 | 1.7777 | 0.7005    | 0.0083  | 0.0503 | 0.8799 | 2.0784 | 0.5563 | 7.1362  |
| genus. Ruminiclostridium5. id. 11355       | LargeArteryStroke   | Inverse variance weighted | 5 | 0.9579 | 0.6566 | 1.3974 | 0.8233    | 0.0083  | 0.0503 | 0.8799 | 2.0784 | 0.5563 | 7.1362  |
| genus. Ruminiclostridium5. id. 11355       | LargeArteryStroke   | Simple mode               | 5 | 1.1421 | 0.6284 | 2.0761 | 0.6854    | 0.0083  | 0.0503 | 0.8799 | 2.0784 | 0.5563 | 7.1362  |
| genus. Ruminiclostridium5. id. 11355       | LargeArteryStroke   | Weighted mode             | 5 | 1.1421 | 0.6087 | 2.1432 | 0.7002    | 0.0083  | 0.0503 | 0.8799 | 2.0784 | 0.5563 | 7.1362  |
| genus. Ruminiclostridium5. id. 11355       | SmallVesselStroke   | MR Egger                  | 5 | 1.1786 | 0.2618 | 5.3055 | 0.8442    | -0.0085 | 0.0467 | 0.8671 | 2.8507 | 0.4152 | 10.1133 |
| genus. Ruminiclostridium5. id. 11355       | SmallVesselStroke   | Weighted median           | 5 | 0.9290 | 0.5823 | 1.4820 | 0.7572    | -0.0085 | 0.0467 | 0.8671 | 2.8507 | 0.4152 | 10.1133 |
| genus. Ruminiclostridium5. id. 11355       | SmallVesselStroke   | Inverse variance weighted | 5 | 1.0288 | 0.7244 | 1.4612 | 0.8740    | -0.0085 | 0.0467 | 0.8671 | 2.8507 | 0.4152 | 10.1133 |
| genus. Ruminiclostridium5. id. 11355       | SmallVesselStroke   | Simple mode               | 5 | 0.9426 | 0.4950 | 1.7948 | 0.8660    | -0.0085 | 0.0467 | 0.8671 | 2.8507 | 0.4152 | 10.1133 |
| genus. Ruminiclostridium5. id. 11355       | SmallVesselStroke   | Weighted mode             | 5 | 0.9552 | 0.5116 | 1.7837 | 0.8926    | -0.0085 | 0.0467 | 0.8671 | 2.8507 | 0.4152 | 10.1133 |
| genus. Ruminiclostridium5. id. 11355       | Stroke              | MR Egger                  | 5 | 1.1354 | 0.5879 | 2.1928 | 0.7305    | -0.0036 | 0.0204 | 0.8696 | 5.2555 | 0.1540 | 24.3636 |
| genus. Ruminiclostridium5. id. 11355       | Stroke              | Weighted median           | 5 | 1.0313 | 0.8759 | 1.2143 | 0.7116    | -0.0036 | 0.0204 | 0.8696 | 5.2555 | 0.1540 | 24.3636 |
| genus. Ruminiclostridium5. id. 11355       | Stroke              | Inverse variance weighted | 5 | 1.0710 | 0.9378 | 1.2231 | 0.3115    | -0.0036 | 0.0204 | 0.8696 | 5.2555 | 0.1540 | 24.3636 |
| genus. Ruminiclostridium5. id. 11355       | Stroke              | Simple mode               | 5 | 0.9890 | 0.7952 | 1.2299 | 0.9254    | -0.0036 | 0.0204 | 0.8696 | 5.2555 | 0.1540 | 24.3636 |
| genus. Ruminiclostridium5. id. 11355       | Stroke              | Weighted mode             | 5 | 1.0000 | 0.8117 | 1.2318 | 0.9998    | -0.0036 | 0.0204 | 0.8696 | 5.2555 | 0.1540 | 24.3636 |
| genus. Ruminiclostridium6. id. 11356       | CardioEmbolicStroke | MR Egger                  | 4 | 1.7998 | 0.8476 | 3.8219 | 0.2657    | -0.0611 | 0.0368 | 0.2387 | 3.1200 | 0.3735 | 22.5039 |
| genus. Ruminiclostridium6. id. 11356       | CardioEmbolicStroke | Weighted median           | 4 | 1.1044 | 0.7997 | 1.5251 | 0.5466    | -0.0611 | 0.0368 | 0.2387 | 3.1200 | 0.3735 | 22.5039 |
| genus. Ruminiclostridium6. id. 11356       | CardioEmbolicStroke | Inverse variance weighted | 4 | 0.9902 | 0.7569 | 1.2953 | 0.9425    | -0.0611 | 0.0368 | 0.2387 | 3.1200 | 0.3735 | 22.5039 |
| genus. Ruminiclostridium6. id. 11356       | CardioEmbolicStroke | Simple mode               | 4 | 1.1461 | 0.7213 | 1.8210 | 0.6044    | -0.0611 | 0.0368 | 0.2387 | 3.1200 | 0.3735 | 22.5039 |
| genus. Ruminiclostridium6. id. 11356       | CardioEmbolicStroke | Weighted mode             | 4 | 1.1484 | 0.7586 | 1.7385 | 0.5598    | -0.0611 | 0.0368 | 0.2387 | 3.1200 | 0.3735 | 22.5039 |
| genus. Ruminiclostridium6. id. 11356       | IschemicStroke      | MR Egger                  | 4 | 1.0127 | 0.7086 | 1.4474 | 0.9510    | -0.0163 | 0.0175 | 0.4489 | 2.2507 | 0.3245 | 24.4454 |
| genus. Ruminiclostridium6. id. 11356       | IschemicStroke      | Weighted median           | 4 | 0.8581 | 0.7454 | 0.9879 | 0.0333    | -0.0163 | 0.0175 | 0.4489 | 2.2507 | 0.3245 | 24.4454 |

|                                               |                     |                           |   |        |        |          |        |         |        |        |        |        |         |
|-----------------------------------------------|---------------------|---------------------------|---|--------|--------|----------|--------|---------|--------|--------|--------|--------|---------|
| genus. Ruminiclostridium6. id. 11356          | IschemicStroke      | Inverse variance weighted | 4 | 0.8631 | 0.7658 | 0.9727   | 0.0158 | -0.0163 | 0.0175 | 0.4489 | 2.2507 | 0.3245 | 24.4454 |
| genus. Ruminiclostridium6. id. 11356          | IschemicStroke      | Simple mode               | 4 | 0.8329 | 0.6562 | 1.0572   | 0.2300 | -0.0163 | 0.0175 | 0.4489 | 2.2507 | 0.3245 | 24.4454 |
| genus. Ruminiclostridium6. id. 11356          | IschemicStroke      | Weighted mode             | 4 | 0.8407 | 0.6647 | 1.0634   | 0.2436 | -0.0163 | 0.0175 | 0.4489 | 2.2507 | 0.3245 | 24.4454 |
| genus. Ruminiclostridium6. id. 11356          | LargeArteryStroke   | MR Egger                  | 4 | 0.6430 | 0.2331 | 1.7737   | 0.4835 | 0.0278  | 0.0492 | 0.6288 | 1.0903 | 0.5797 | 9.9195  |
| genus. Ruminiclostridium6. id. 11356          | LargeArteryStroke   | Weighted median           | 4 | 0.8944 | 0.5826 | 1.3729   | 0.6096 | 0.0278  | 0.0492 | 0.6288 | 1.0903 | 0.5797 | 9.9195  |
| genus. Ruminiclostridium6. id. 11356          | LargeArteryStroke   | Inverse variance weighted | 4 | 0.8456 | 0.5914 | 1.2091   | 0.3580 | 0.0278  | 0.0492 | 0.6288 | 1.0903 | 0.5797 | 9.9195  |
| genus. Ruminiclostridium6. id. 11356          | LargeArteryStroke   | Simple mode               | 4 | 0.9479 | 0.5161 | 1.7406   | 0.8739 | 0.0278  | 0.0492 | 0.6288 | 1.0903 | 0.5797 | 9.9195  |
| genus. Ruminiclostridium6. id. 11356          | LargeArteryStroke   | Weighted mode             | 4 | 0.9479 | 0.5162 | 1.7404   | 0.8739 | 0.0278  | 0.0492 | 0.6288 | 1.0903 | 0.5797 | 9.9195  |
| genus. Ruminiclostridium6. id. 11356          | SmallVesselStroke   | MR Egger                  | 4 | 1.1969 | 0.4648 | 3.0826   | 0.7453 | -0.0274 | 0.0460 | 0.6116 | 1.1484 | 0.5632 | 17.0524 |
| genus. Ruminiclostridium6. id. 11356          | SmallVesselStroke   | Weighted median           | 4 | 0.8530 | 0.5787 | 1.2573   | 0.4219 | -0.0274 | 0.0460 | 0.6116 | 1.1484 | 0.5632 | 17.0524 |
| genus. Ruminiclostridium6. id. 11356          | SmallVesselStroke   | Inverse variance weighted | 4 | 0.9142 | 0.6561 | 1.2739   | 0.5962 | -0.0274 | 0.0460 | 0.6116 | 1.1484 | 0.5632 | 17.0524 |
| genus. Ruminiclostridium6. id. 11356          | SmallVesselStroke   | Simple mode               | 4 | 0.7820 | 0.4522 | 1.3523   | 0.4436 | -0.0274 | 0.0460 | 0.6116 | 1.1484 | 0.5632 | 17.0524 |
| genus. Ruminiclostridium6. id. 11356          | SmallVesselStroke   | Weighted mode             | 4 | 0.7989 | 0.4790 | 1.3323   | 0.4527 | -0.0274 | 0.0460 | 0.6116 | 1.1484 | 0.5632 | 17.0524 |
| genus. Ruminiclostridium6. id. 11356          | Stroke              | MR Egger                  | 4 | 1.0879 | 0.6983 | 1.6948   | 0.7454 | -0.0157 | 0.0217 | 0.5445 | 4.1595 | 0.1250 | 32.6379 |
| genus. Ruminiclostridium6. id. 11356          | Stroke              | Weighted median           | 4 | 0.9364 | 0.8191 | 1.0704   | 0.3353 | -0.0157 | 0.0217 | 0.5445 | 4.1595 | 0.1250 | 32.6379 |
| genus. Ruminiclostridium6. id. 11356          | Stroke              | Inverse variance weighted | 4 | 0.9329 | 0.8112 | 1.0727   | 0.3295 | -0.0157 | 0.0217 | 0.5445 | 4.1595 | 0.1250 | 32.6379 |
| genus. Ruminiclostridium6. id. 11356          | Stroke              | Simple mode               | 4 | 0.8666 | 0.6902 | 1.0880   | 0.3052 | -0.0157 | 0.0217 | 0.5445 | 4.1595 | 0.1250 | 32.6379 |
| genus. Ruminiclostridium6. id. 11356          | Stroke              | Weighted mode             | 4 | 0.8841 | 0.7048 | 1.1092   | 0.3652 | -0.0157 | 0.0217 | 0.5445 | 4.1595 | 0.1250 | 32.6379 |
| genus. Ruminiclostridium9. id. 11357          | CardioEmbolicStroke | MR Egger                  | 3 | 8.7451 | 0.6754 | 113.2382 | 0.3452 | -0.1275 | 0.0774 | 0.3472 | 3.6815 | 0.1587 | 5.0026  |
| genus. Ruminiclostridium9. id. 11357          | CardioEmbolicStroke | Weighted median           | 3 | 0.9236 | 0.5760 | 1.4811   | 0.7416 | -0.1275 | 0.0774 | 0.3472 | 3.6815 | 0.1587 | 5.0026  |
| genus. Ruminiclostridium9. id. 11357          | CardioEmbolicStroke | Inverse variance weighted | 3 | 1.0358 | 0.6462 | 1.6603   | 0.8838 | -0.1275 | 0.0774 | 0.3472 | 3.6815 | 0.1587 | 5.0026  |
| genus. Ruminiclostridium9. id. 11357          | CardioEmbolicStroke | Simple mode               | 3 | 0.8305 | 0.4637 | 1.4874   | 0.5960 | -0.1275 | 0.0774 | 0.3472 | 3.6815 | 0.1587 | 5.0026  |
| genus. Ruminiclostridium9. id. 11357          | CardioEmbolicStroke | Weighted mode             | 3 | 0.8547 | 0.4805 | 1.5202   | 0.6465 | -0.1275 | 0.0774 | 0.3472 | 3.6815 | 0.1587 | 5.0026  |
| genus. Ruminiclostridium9. id. 11357          | IschemicStroke      | MR Egger                  | 3 | 0.9564 | 0.0800 | 11.4368  | 0.9776 | -0.0031 | 0.0750 | 0.9741 | 4.8467 | 0.0277 | 12.7834 |
| genus. Ruminiclostridium9. id. 11357          | IschemicStroke      | Weighted median           | 3 | 0.9594 | 0.7595 | 1.2119   | 0.7281 | -0.0031 | 0.0750 | 0.9741 | 4.8467 | 0.0277 | 12.7834 |
| genus. Ruminiclostridium9. id. 11357          | IschemicStroke      | Inverse variance weighted | 3 | 0.9088 | 0.7157 | 1.1539   | 0.4325 | -0.0031 | 0.0750 | 0.9741 | 4.8467 | 0.0277 | 12.7834 |
| genus. Ruminiclostridium9. id. 11357          | IschemicStroke      | Simple mode               | 3 | 1.0176 | 0.7628 | 1.3574   | 0.9165 | -0.0031 | 0.0750 | 0.9741 | 4.8467 | 0.0277 | 12.7834 |
| genus. Ruminiclostridium9. id. 11357          | IschemicStroke      | Weighted mode             | 3 | 1.0176 | 0.7407 | 1.3980   | 0.9242 | -0.0031 | 0.0750 | 0.9741 | 4.8467 | 0.0277 | 12.7834 |
| genus. Ruminiclostridium9. id. 11357          | LargeArteryStroke   | MR Egger                  | 3 | 0.1198 | 0.0010 | 14.3943  | 0.5447 | 0.1223  | 0.1445 | 0.5528 | 1.9739 | 0.1600 | 4.6952  |
| genus. Ruminiclostridium9. id. 11357          | LargeArteryStroke   | Weighted median           | 3 | 0.9394 | 0.5047 | 1.7482   | 0.8436 | 0.1223  | 0.1445 | 0.5528 | 1.9739 | 0.1600 | 4.6952  |
| genus. Ruminiclostridium9. id. 11357          | LargeArteryStroke   | Inverse variance weighted | 3 | 0.9298 | 0.5092 | 1.6979   | 0.8127 | 0.1223  | 0.1445 | 0.5528 | 1.9739 | 0.1600 | 4.6952  |
| genus. Ruminiclostridium9. id. 11357          | LargeArteryStroke   | Simple mode               | 3 | 1.1166 | 0.4595 | 2.7133   | 0.8304 | 0.1223  | 0.1445 | 0.5528 | 1.9739 | 0.1600 | 4.6952  |
| genus. Ruminiclostridium9. id. 11357          | LargeArteryStroke   | Weighted mode             | 3 | 0.8907 | 0.3769 | 2.1050   | 0.8166 | 0.1223  | 0.1445 | 0.5528 | 1.9739 | 0.1600 | 4.6952  |
| genus. Ruminiclostridium9. id. 11357          | SmallVesselStroke   | MR Egger                  | 3 | 2.7372 | 0.0189 | 396.6513 | 0.7596 | -0.0525 | 0.1503 | 0.7859 | 2.4479 | 0.1177 | 3.9644  |
| genus. Ruminiclostridium9. id. 11357          | SmallVesselStroke   | Weighted median           | 3 | 1.0386 | 0.5818 | 1.8541   | 0.8981 | -0.0525 | 0.1503 | 0.7859 | 2.4479 | 0.1177 | 3.9644  |
| genus. Ruminiclostridium9. id. 11357          | SmallVesselStroke   | Inverse variance weighted | 3 | 1.1361 | 0.6848 | 1.8848   | 0.6213 | -0.0525 | 0.1503 | 0.7859 | 2.4479 | 0.1177 | 3.9644  |
| genus. Ruminiclostridium9. id. 11357          | SmallVesselStroke   | Simple mode               | 3 | 1.0094 | 0.4685 | 2.1750   | 0.9831 | -0.0525 | 0.1503 | 0.7859 | 2.4479 | 0.1177 | 3.9644  |
| genus. Ruminiclostridium9. id. 11357          | SmallVesselStroke   | Weighted mode             | 3 | 0.9401 | 0.4682 | 1.8878   | 0.8781 | -0.0525 | 0.1503 | 0.7859 | 2.4479 | 0.1177 | 3.9644  |
| genus. Ruminiclostridium9. id. 11357          | Stroke              | MR Egger                  | 3 | 0.9069 | 0.1793 | 4.5856   | 0.9251 | 0.0018  | 0.0489 | 0.9771 | 2.4332 | 0.1188 | 21.0148 |
| genus. Ruminiclostridium9. id. 11357          | Stroke              | Weighted median           | 3 | 0.9711 | 0.8038 | 1.1733   | 0.7614 | 0.0018  | 0.0489 | 0.9771 | 2.4332 | 0.1188 | 21.0148 |
| genus. Ruminiclostridium9. id. 11357          | Stroke              | Inverse variance weighted | 3 | 0.9340 | 0.7991 | 1.0918   | 0.3912 | 0.0018  | 0.0489 | 0.9771 | 2.4332 | 0.1188 | 21.0148 |
| genus. Ruminiclostridium9. id. 11357          | Stroke              | Simple mode               | 3 | 1.0201 | 0.7999 | 1.3008   | 0.8875 | 0.0018  | 0.0489 | 0.9771 | 2.4332 | 0.1188 | 21.0148 |
| genus. Ruminiclostridium9. id. 11357          | Stroke              | Weighted mode             | 3 | 1.0201 | 0.7963 | 1.3068   | 0.8895 | 0.0018  | 0.0489 | 0.9771 | 2.4332 | 0.1188 | 21.0148 |
| genus. RuminococcaceaeNK4A214group. id. 11358 | CardioEmbolicStroke | MR Egger                  | 5 | 0.7213 | 0.3922 | 1.3265   | 0.3704 | 0.0147  | 0.0239 | 0.5806 | 1.2416 | 0.7430 | 14.2882 |
| genus. RuminococcaceaeNK4A214group. id. 11358 | CardioEmbolicStroke | Weighted median           | 5 | 0.7961 | 0.5810 | 1.0908   | 0.1559 | 0.0147  | 0.0239 | 0.5806 | 1.2416 | 0.7430 | 14.2882 |
| genus. RuminococcaceaeNK4A214group. id. 11358 | CardioEmbolicStroke | Inverse variance weighted | 5 | 0.8583 | 0.6629 | 1.1112   | 0.2461 | 0.0147  | 0.0239 | 0.5806 | 1.2416 | 0.7430 | 14.2882 |
| genus. RuminococcaceaeNK4A214group. id. 11358 | CardioEmbolicStroke | Simple mode               | 5 | 0.7648 | 0.5022 | 1.1648   | 0.2797 | 0.0147  | 0.0239 | 0.5806 | 1.2416 | 0.7430 | 14.2882 |
| genus. RuminococcaceaeNK4A214group. id. 11358 | CardioEmbolicStroke | Weighted mode             | 5 | 0.7619 | 0.4899 | 1.1850   | 0.2941 | 0.0147  | 0.0239 | 0.5806 | 1.2416 | 0.7430 | 14.2882 |
| genus. RuminococcaceaeNK4A214group. id. 11358 | IschemicStroke      | MR Egger                  | 5 | 0.8976 | 0.6807 | 1.1835   | 0.4995 | 0.0071  | 0.0109 | 0.5640 | 3.3750 | 0.3373 | 53.7162 |
| genus. RuminococcaceaeNK4A214group. id. 11358 | IschemicStroke      | Weighted median           | 5 | 0.9509 | 0.8242 | 1.0971   | 0.4902 | 0.0071  | 0.0109 | 0.5640 | 3.3750 | 0.3373 | 53.7162 |
| genus. RuminococcaceaeNK4A214group. id. 11358 | IschemicStroke      | Inverse variance weighted | 5 | 0.9747 | 0.8719 | 1.0897   | 0.6529 | 0.0071  | 0.0109 | 0.5640 | 3.3750 | 0.3373 | 53.7162 |
| genus. RuminococcaceaeNK4A214group. id. 11358 | IschemicStroke      | Simple mode               | 5 | 0.9534 | 0.8019 | 1.1336   | 0.6179 | 0.0071  | 0.0109 | 0.5640 | 3.3750 | 0.3373 | 53.7162 |
| genus. RuminococcaceaeNK4A214group. id. 11358 | IschemicStroke      | Weighted mode             | 5 | 0.9534 | 0.8116 | 1.1200   | 0.5926 | 0.0071  | 0.0109 | 0.5640 | 3.3750 | 0.3373 | 53.7162 |
| genus. RuminococcaceaeNK4A214group. id. 11358 | LargeArteryStroke   | MR Egger                  | 5 | 1.0607 | 0.4616 | 2.4371   | 0.8985 | -0.0137 | 0.0324 | 0.7006 | 1.1562 | 0.7635 | 18.3535 |

|                                               |                     |                           |   |        |        |        |        |         |        |        |        |        |          |
|-----------------------------------------------|---------------------|---------------------------|---|--------|--------|--------|--------|---------|--------|--------|--------|--------|----------|
| genus. RuminococcaceaeNK4A214group. id. 11358 | LargeArteryStroke   | Weighted median           | 5 | 1.0108 | 0.6605 | 1.5469 | 0.9605 | -0.0137 | 0.0324 | 0.7006 | 1.1562 | 0.7635 | 18.3535  |
| genus. RuminococcaceaeNK4A214group. id. 11358 | LargeArteryStroke   | Inverse variance weighted | 5 | 0.9014 | 0.6330 | 1.2838 | 0.5651 | -0.0137 | 0.0324 | 0.7006 | 1.1562 | 0.7635 | 18.3535  |
| genus. RuminococcaceaeNK4A214group. id. 11358 | LargeArteryStroke   | Simple mode               | 5 | 1.0330 | 0.5586 | 1.9102 | 0.9225 | -0.0137 | 0.0324 | 0.7006 | 1.1562 | 0.7635 | 18.3535  |
| genus. RuminococcaceaeNK4A214group. id. 11358 | LargeArteryStroke   | Weighted mode             | 5 | 1.0486 | 0.5804 | 1.8945 | 0.8826 | -0.0137 | 0.0324 | 0.7006 | 1.1562 | 0.7635 | 18.3535  |
| genus. RuminococcaceaeNK4A214group. id. 11358 | SmallVesselStroke   | MR Egger                  | 5 | 1.0503 | 0.4909 | 2.2471 | 0.9073 | -0.0071 | 0.0299 | 0.8279 | 1.2064 | 0.7515 | 29.2332  |
| genus. RuminococcaceaeNK4A214group. id. 11358 | SmallVesselStroke   | Weighted median           | 5 | 1.0279 | 0.6939 | 1.5225 | 0.8909 | -0.0071 | 0.0299 | 0.8279 | 1.2064 | 0.7515 | 29.2332  |
| genus. RuminococcaceaeNK4A214group. id. 11358 | SmallVesselStroke   | Inverse variance weighted | 5 | 0.9664 | 0.7001 | 1.3340 | 0.8353 | -0.0071 | 0.0299 | 0.8279 | 1.2064 | 0.7515 | 29.2332  |
| genus. RuminococcaceaeNK4A214group. id. 11358 | SmallVesselStroke   | Simple mode               | 5 | 1.1246 | 0.6794 | 1.8614 | 0.6717 | -0.0071 | 0.0299 | 0.8279 | 1.2064 | 0.7515 | 29.2332  |
| genus. RuminococcaceaeNK4A214group. id. 11358 | SmallVesselStroke   | Weighted mode             | 5 | 1.1173 | 0.6681 | 1.8685 | 0.6943 | -0.0071 | 0.0299 | 0.8279 | 1.2064 | 0.7515 | 29.2332  |
| genus. RuminococcaceaeNK4A214group. id. 11358 | Stroke              | MR Egger                  | 5 | 0.8793 | 0.6915 | 1.1180 | 0.3709 | 0.0097  | 0.0096 | 0.3849 | 2.6793 | 0.6128 | 65.2455  |
| genus. RuminococcaceaeNK4A214group. id. 11358 | Stroke              | Weighted median           | 5 | 0.9657 | 0.8520 | 1.0944 | 0.5844 | 0.0097  | 0.0096 | 0.3849 | 2.6793 | 0.6128 | 65.2455  |
| genus. RuminococcaceaeNK4A214group. id. 11358 | Stroke              | Inverse variance weighted | 5 | 0.9837 | 0.8868 | 1.0911 | 0.7556 | 0.0097  | 0.0096 | 0.3849 | 2.6793 | 0.6128 | 65.2455  |
| genus. RuminococcaceaeNK4A214group. id. 11358 | Stroke              | Simple mode               | 5 | 0.9780 | 0.8322 | 1.1494 | 0.8005 | 0.0097  | 0.0096 | 0.3849 | 2.6793 | 0.6128 | 65.2455  |
| genus. RuminococcaceaeNK4A214group. id. 11358 | Stroke              | Weighted mode             | 5 | 0.9587 | 0.8207 | 1.1200 | 0.6233 | 0.0097  | 0.0096 | 0.3849 | 2.6793 | 0.6128 | 65.2455  |
| genus. RuminococcaceaeUCG002. id. 11360       | CardioEmbolicStroke | MR Egger                  | 5 | 1.2125 | 0.6119 | 2.4026 | 0.6193 | -0.0243 | 0.0289 | 0.4629 | 2.9850 | 0.3939 | 12.9916  |
| genus. RuminococcaceaeUCG002. id. 11360       | CardioEmbolicStroke | Weighted median           | 5 | 0.9620 | 0.6891 | 1.3430 | 0.8200 | -0.0243 | 0.0289 | 0.4629 | 2.9850 | 0.3939 | 12.9916  |
| genus. RuminococcaceaeUCG002. id. 11360       | CardioEmbolicStroke | Inverse variance weighted | 5 | 0.9248 | 0.7128 | 1.1998 | 0.5561 | -0.0243 | 0.0289 | 0.4629 | 2.9850 | 0.3939 | 12.9916  |
| genus. RuminococcaceaeUCG002. id. 11360       | CardioEmbolicStroke | Simple mode               | 5 | 0.9443 | 0.5727 | 1.5569 | 0.8333 | -0.0243 | 0.0289 | 0.4629 | 2.9850 | 0.3939 | 12.9916  |
| genus. RuminococcaceaeUCG002. id. 11360       | CardioEmbolicStroke | Weighted mode             | 5 | 1.0568 | 0.6667 | 1.6751 | 0.8257 | -0.0243 | 0.0289 | 0.4629 | 2.9850 | 0.3939 | 12.9916  |
| genus. RuminococcaceaeUCG002. id. 11360       | IschemicStroke      | MR Egger                  | 5 | 0.9793 | 0.7066 | 1.3572 | 0.9080 | 0.0005  | 0.0141 | 0.9733 | 4.1984 | 0.2408 | 47.4348  |
| genus. RuminococcaceaeUCG002. id. 11360       | IschemicStroke      | Weighted median           | 5 | 1.0099 | 0.8744 | 1.1663 | 0.8938 | 0.0005  | 0.0141 | 0.9733 | 4.1984 | 0.2408 | 47.4348  |
| genus. RuminococcaceaeUCG002. id. 11360       | IschemicStroke      | Inverse variance weighted | 5 | 0.9848 | 0.8801 | 1.1019 | 0.7888 | 0.0005  | 0.0141 | 0.9733 | 4.1984 | 0.2408 | 47.4348  |
| genus. RuminococcaceaeUCG002. id. 11360       | IschemicStroke      | Simple mode               | 5 | 1.0083 | 0.8151 | 1.2472 | 0.9431 | 0.0005  | 0.0141 | 0.9733 | 4.1984 | 0.2408 | 47.4348  |
| genus. RuminococcaceaeUCG002. id. 11360       | IschemicStroke      | Weighted mode             | 5 | 1.0295 | 0.8702 | 1.2179 | 0.7520 | 0.0005  | 0.0141 | 0.9733 | 4.1984 | 0.2408 | 47.4348  |
| genus. RuminococcaceaeUCG002. id. 11360       | LargeArteryStroke   | MR Egger                  | 5 | 0.8008 | 0.3023 | 2.1210 | 0.6851 | 0.0014  | 0.0403 | 0.9738 | 1.5980 | 0.6598 | 12.5400  |
| genus. RuminococcaceaeUCG002. id. 11360       | LargeArteryStroke   | Weighted median           | 5 | 0.8173 | 0.5311 | 1.2578 | 0.3590 | 0.0014  | 0.0403 | 0.9738 | 1.5980 | 0.6598 | 12.5400  |
| genus. RuminococcaceaeUCG002. id. 11360       | LargeArteryStroke   | Inverse variance weighted | 5 | 0.8140 | 0.5690 | 1.1646 | 0.2602 | 0.0014  | 0.0403 | 0.9738 | 1.5980 | 0.6598 | 12.5400  |
| genus. RuminococcaceaeUCG002. id. 11360       | LargeArteryStroke   | Simple mode               | 5 | 0.8122 | 0.4506 | 1.4640 | 0.5270 | 0.0014  | 0.0403 | 0.9738 | 1.5980 | 0.6598 | 12.5400  |
| genus. RuminococcaceaeUCG002. id. 11360       | LargeArteryStroke   | Weighted mode             | 5 | 0.8102 | 0.4412 | 1.4879 | 0.5345 | 0.0014  | 0.0403 | 0.9738 | 1.5980 | 0.6598 | 12.5400  |
| genus. RuminococcaceaeUCG002. id. 11360       | SmallVesselStroke   | MR Egger                  | 4 | 0.4050 | 0.0541 | 3.0332 | 0.4717 | 0.0489  | 0.0724 | 0.5694 | 1.1958 | 0.5500 | 7.3603   |
| genus. RuminococcaceaeUCG002. id. 11360       | SmallVesselStroke   | Weighted median           | 4 | 0.7715 | 0.4740 | 1.2558 | 0.2967 | 0.0489  | 0.0724 | 0.5694 | 1.1958 | 0.5500 | 7.3603   |
| genus. RuminococcaceaeUCG002. id. 11360       | SmallVesselStroke   | Inverse variance weighted | 4 | 0.7992 | 0.5391 | 1.1847 | 0.2644 | 0.0489  | 0.0724 | 0.5694 | 1.1958 | 0.5500 | 7.3603   |
| genus. RuminococcaceaeUCG002. id. 11360       | SmallVesselStroke   | Simple mode               | 4 | 0.7319 | 0.3831 | 1.3981 | 0.4143 | 0.0489  | 0.0724 | 0.5694 | 1.1958 | 0.5500 | 7.3603   |
| genus. RuminococcaceaeUCG002. id. 11360       | SmallVesselStroke   | Weighted mode             | 4 | 0.7295 | 0.3853 | 1.3814 | 0.4044 | 0.0489  | 0.0724 | 0.5694 | 1.1958 | 0.5500 | 7.3603   |
| genus. RuminococcaceaeUCG002. id. 11360       | Stroke              | MR Egger                  | 5 | 0.9701 | 0.7515 | 1.2523 | 0.8308 | 0.0025  | 0.0110 | 0.8336 | 2.4711 | 0.4805 | 66.8421  |
| genus. RuminococcaceaeUCG002. id. 11360       | Stroke              | Weighted median           | 5 | 1.0342 | 0.9144 | 1.1698 | 0.5923 | 0.0025  | 0.0110 | 0.8336 | 2.4711 | 0.4805 | 66.8421  |
| genus. RuminococcaceaeUCG002. id. 11360       | Stroke              | Inverse variance weighted | 5 | 0.9970 | 0.9010 | 1.1033 | 0.9543 | 0.0025  | 0.0110 | 0.8336 | 2.4711 | 0.4805 | 66.8421  |
| genus. RuminococcaceaeUCG002. id. 11360       | Stroke              | Simple mode               | 5 | 1.0551 | 0.8836 | 1.2598 | 0.5853 | 0.0025  | 0.0110 | 0.8336 | 2.4711 | 0.4805 | 66.8421  |
| genus. RuminococcaceaeUCG002. id. 11360       | Stroke              | Weighted mode             | 5 | 1.0469 | 0.8938 | 1.2264 | 0.6001 | 0.0025  | 0.0110 | 0.8336 | 2.4711 | 0.4805 | 66.8421  |
| genus. RuminococcaceaeUCG003. id. 11361       | CardioEmbolicStroke | Inverse variance weighted | 2 | 0.8963 | 0.5997 | 1.3397 | 0.5935 | NA      | NA     | NA     | 0.5193 | 0.4712 | 11.1777  |
| genus. RuminococcaceaeUCG003. id. 11361       | IschemicStroke      | Inverse variance weighted | 2 | 1.2803 | 0.6866 | 2.3873 | 0.4370 | NA      | NA     | NA     | #####  | 0.0003 | 4.6923   |
| genus. RuminococcaceaeUCG003. id. 11361       | LargeArteryStroke   | Inverse variance weighted | 2 | 1.7938 | 1.0507 | 3.0625 | 0.0322 | NA      | NA     | NA     | 0.8441 | 0.3582 | 2.3679   |
| genus. RuminococcaceaeUCG003. id. 11361       | SmallVesselStroke   | Inverse variance weighted | 2 | 1.0329 | 0.4368 | 2.4429 | 0.9412 | NA      | NA     | NA     | 2.9708 | 0.0848 | 3.8080   |
| genus. RuminococcaceaeUCG003. id. 11361       | Stroke              | Inverse variance weighted | 2 | 1.2541 | 0.7821 | 2.0108 | 0.3474 | NA      | NA     | NA     | 8.8085 | 0.0030 | 6.2074   |
| genus. RuminococcaceaeUCG004. id. 11362       | CardioEmbolicStroke | Inverse variance weighted | 2 | 0.9400 | 0.6921 | 1.2767 | 0.6922 | NA      | NA     | NA     | 0.0011 | 0.9735 | 57.4451  |
| genus. RuminococcaceaeUCG004. id. 11362       | IschemicStroke      | Inverse variance weighted | 2 | 1.0231 | 0.8925 | 1.1729 | 0.7429 | NA      | NA     | NA     | 0.0169 | 0.8967 | 178.4947 |
| genus. RuminococcaceaeUCG004. id. 11362       | LargeArteryStroke   | Inverse variance weighted | 2 | 0.9737 | 0.6462 | 1.4671 | 0.8985 | NA      | NA     | NA     | 0.0266 | 0.8704 | 68.8446  |
| genus. RuminococcaceaeUCG004. id. 11362       | SmallVesselStroke   | Inverse variance weighted | 2 | 0.7882 | 0.5347 | 1.1617 | 0.2291 | NA      | NA     | NA     | 0.1977 | 0.6566 | 8.5958   |
| genus. RuminococcaceaeUCG004. id. 11362       | Stroke              | Inverse variance weighted | 2 | 1.0020 | 0.8838 | 1.1360 | 0.9756 | NA      | NA     | NA     | 0.0116 | 0.9142 | 616.9456 |
| genus. RuminococcaceaeUCG005. id. 11363       | CardioEmbolicStroke | MR Egger                  | 3 | 1.1045 | 0.5901 | 2.0674 | 0.8082 | -0.0196 | 0.0362 | 0.6841 | 0.2942 | 0.8632 | 88.3936  |
| genus. RuminococcaceaeUCG005. id. 11363       | CardioEmbolicStroke | Weighted median           | 3 | 0.9778 | 0.7071 | 1.3522 | 0.8921 | -0.0196 | 0.0362 | 0.6841 | 0.2942 | 0.8632 | 88.3936  |
| genus. RuminococcaceaeUCG005. id. 11363       | CardioEmbolicStroke | Inverse variance weighted | 3 | 0.9456 | 0.7167 | 1.2476 | 0.6923 | -0.0196 | 0.0362 | 0.6841 | 0.2942 | 0.8632 | 88.3936  |
| genus. RuminococcaceaeUCG005. id. 11363       | CardioEmbolicStroke | Simple mode               | 3 | 0.9812 | 0.6790 | 1.4179 | 0.9288 | -0.0196 | 0.0362 | 0.6841 | 0.2942 | 0.8632 | 88.3936  |
| genus. RuminococcaceaeUCG005. id. 11363       | CardioEmbolicStroke | Weighted mode             | 3 | 0.9845 | 0.6777 | 1.4303 | 0.9422 | -0.0196 | 0.0362 | 0.6841 | 0.2942 | 0.8632 | 88.3936  |

|                                         |                     |                           |   |        |        |        |        |        |        |        |        |        |         |
|-----------------------------------------|---------------------|---------------------------|---|--------|--------|--------|--------|--------|--------|--------|--------|--------|---------|
| genus. RuminococcaceaeUCG005. id. 11363 | IschemicStroke      | MR Egger                  | 3 | 0.8504 | 0.6537 | 1.1063 | 0.4405 | 0.0205 | 0.0149 | 0.4012 | 2.3422 | 0.3100 | 61.3569 |
| genus. RuminococcaceaeUCG005. id. 11363 | IschemicStroke      | Weighted median           | 3 | 1.0014 | 0.8714 | 1.1509 | 0.9839 | 0.0205 | 0.0149 | 0.4012 | 2.3422 | 0.3100 | 61.3569 |
| genus. RuminococcaceaeUCG005. id. 11363 | IschemicStroke      | Inverse variance weighted | 3 | 1.0027 | 0.8832 | 1.1383 | 0.9668 | 0.0205 | 0.0149 | 0.4012 | 2.3422 | 0.3100 | 61.3569 |
| genus. RuminococcaceaeUCG005. id. 11363 | IschemicStroke      | Simple mode               | 3 | 1.0762 | 0.8750 | 1.3237 | 0.5587 | 0.0205 | 0.0149 | 0.4012 | 2.3422 | 0.3100 | 61.3569 |
| genus. RuminococcaceaeUCG005. id. 11363 | IschemicStroke      | Weighted mode             | 3 | 0.9525 | 0.8085 | 1.1223 | 0.6199 | 0.0205 | 0.0149 | 0.4012 | 2.3422 | 0.3100 | 61.3569 |
| genus. RuminococcaceaeUCG005. id. 11363 | LargeArteryStroke   | MR Egger                  | 3 | 1.0762 | 0.4531 | 2.5563 | 0.8950 | 0.0130 | 0.0493 | 0.8360 | 0.2826 | 0.5950 | 18.9819 |
| genus. RuminococcaceaeUCG005. id. 11363 | LargeArteryStroke   | Weighted median           | 3 | 1.2062 | 0.7767 | 1.8731 | 0.4039 | 0.0130 | 0.0493 | 0.8360 | 0.2826 | 0.5950 | 18.9819 |
| genus. RuminococcaceaeUCG005. id. 11363 | LargeArteryStroke   | Inverse variance weighted | 3 | 1.1946 | 0.8157 | 1.7495 | 0.3610 | 0.0130 | 0.0493 | 0.8360 | 0.2826 | 0.5950 | 18.9819 |
| genus. RuminococcaceaeUCG005. id. 11363 | LargeArteryStroke   | Simple mode               | 3 | 1.3045 | 0.7796 | 2.1827 | 0.4180 | 0.0130 | 0.0493 | 0.8360 | 0.2826 | 0.5950 | 18.9819 |
| genus. RuminococcaceaeUCG005. id. 11363 | LargeArteryStroke   | Weighted mode             | 3 | 1.0916 | 0.6693 | 1.7803 | 0.7591 | 0.0130 | 0.0493 | 0.8360 | 0.2826 | 0.5950 | 18.9819 |
| genus. RuminococcaceaeUCG005. id. 11363 | SmallVesselStroke   | MR Egger                  | 3 | 0.8682 | 0.3541 | 2.1285 | 0.8092 | 0.0499 | 0.0517 | 0.5112 | 1.3243 | 0.2498 | 11.6175 |
| genus. RuminococcaceaeUCG005. id. 11363 | SmallVesselStroke   | Weighted median           | 3 | 1.2498 | 0.8060 | 1.9380 | 0.3191 | 0.0499 | 0.0517 | 0.5112 | 1.3243 | 0.2498 | 11.6175 |
| genus. RuminococcaceaeUCG005. id. 11363 | SmallVesselStroke   | Inverse variance weighted | 3 | 1.2901 | 0.8735 | 1.9055 | 0.2004 | 0.0499 | 0.0517 | 0.5112 | 1.3243 | 0.2498 | 11.6175 |
| genus. RuminococcaceaeUCG005. id. 11363 | SmallVesselStroke   | Simple mode               | 3 | 1.2596 | 0.7080 | 2.2408 | 0.5146 | 0.0499 | 0.0517 | 0.5112 | 1.3243 | 0.2498 | 11.6175 |
| genus. RuminococcaceaeUCG005. id. 11363 | SmallVesselStroke   | Weighted mode             | 3 | 1.2409 | 0.7452 | 2.0664 | 0.4940 | 0.0499 | 0.0517 | 0.5112 | 1.3243 | 0.2498 | 11.6175 |
| genus. RuminococcaceaeUCG005. id. 11363 | Stroke              | MR Egger                  | 3 | 0.8780 | 0.6877 | 1.1209 | 0.4862 | 0.0165 | 0.0142 | 0.4515 | 1.5223 | 0.4671 | 90.5789 |
| genus. RuminococcaceaeUCG005. id. 11363 | Stroke              | Weighted median           | 3 | 0.9909 | 0.8718 | 1.1264 | 0.8892 | 0.0165 | 0.0142 | 0.4515 | 1.5223 | 0.4671 | 90.5789 |
| genus. RuminococcaceaeUCG005. id. 11363 | Stroke              | Inverse variance weighted | 3 | 1.0000 | 0.8974 | 1.1144 | 0.9997 | 0.0165 | 0.0142 | 0.4515 | 1.5223 | 0.4671 | 90.5789 |
| genus. RuminococcaceaeUCG005. id. 11363 | Stroke              | Simple mode               | 3 | 1.0106 | 0.8419 | 1.2130 | 0.9205 | 0.0165 | 0.0142 | 0.4515 | 1.5223 | 0.4671 | 90.5789 |
| genus. RuminococcaceaeUCG005. id. 11363 | Stroke              | Weighted mode             | 3 | 0.9681 | 0.8393 | 1.1166 | 0.6998 | 0.0165 | 0.0142 | 0.4515 | 1.5223 | 0.4671 | 90.5789 |
| genus. RuminococcaceaeUCG009. id. 11366 | CardioEmbolicStroke | Inverse variance weighted | 2 | 1.1253 | 0.7558 | 1.6753 | 0.5610 | NA     | NA     | NA     | 1.6715 | 0.1961 | 10.6317 |
| genus. RuminococcaceaeUCG009. id. 11366 | IschemicStroke      | Inverse variance weighted | 2 | 0.9806 | 0.7631 | 1.2601 | 0.8785 | NA     | NA     | NA     | 3.5842 | 0.0583 | 21.9887 |
| genus. RuminococcaceaeUCG009. id. 11366 | LargeArteryStroke   | Inverse variance weighted | 2 | 0.9126 | 0.6026 | 1.3821 | 0.6658 | NA     | NA     | NA     | 0.7647 | 0.3818 | 11.7797 |
| genus. RuminococcaceaeUCG009. id. 11366 | SmallVesselStroke   | Inverse variance weighted | 2 | 0.8650 | 0.5934 | 1.2607 | 0.4504 | NA     | NA     | NA     | 0.1420 | 0.7063 | 16.8514 |
| genus. RuminococcaceaeUCG009. id. 11366 | Stroke              | Inverse variance weighted | 2 | 0.9946 | 0.7712 | 1.2827 | 0.9668 | NA     | NA     | NA     | 4.4206 | 0.0355 | 21.8583 |
| genus. RuminococcaceaeUCG011. id. 11368 | CardioEmbolicStroke | MR Egger                  | 6 | 0.9019 | 0.3186 | 2.5531 | 0.8552 | 0.0023 | 0.0666 | 0.9739 | 4.7555 | 0.3133 | 38.4507 |
| genus. RuminococcaceaeUCG011. id. 11368 | CardioEmbolicStroke | Weighted median           | 6 | 0.9645 | 0.8257 | 1.1267 | 0.6488 | 0.0023 | 0.0666 | 0.9739 | 4.7555 | 0.3133 | 38.4507 |
| genus. RuminococcaceaeUCG011. id. 11368 | CardioEmbolicStroke | Inverse variance weighted | 6 | 0.9186 | 0.8156 | 1.0345 | 0.1614 | 0.0023 | 0.0666 | 0.9739 | 4.7555 | 0.3133 | 38.4507 |
| genus. RuminococcaceaeUCG011. id. 11368 | CardioEmbolicStroke | Simple mode               | 6 | 0.9975 | 0.8031 | 1.2389 | 0.9827 | 0.0023 | 0.0666 | 0.9739 | 4.7555 | 0.3133 | 38.4507 |
| genus. RuminococcaceaeUCG011. id. 11368 | CardioEmbolicStroke | Weighted mode             | 6 | 0.9975 | 0.8093 | 1.2294 | 0.9821 | 0.0023 | 0.0666 | 0.9739 | 4.7555 | 0.3133 | 38.4507 |
| genus. RuminococcaceaeUCG011. id. 11368 | IschemicStroke      | MR Egger                  | 6 | 0.8994 | 0.4597 | 1.7595 | 0.7723 | 0.0043 | 0.0430 | 0.9254 | #####  | 0.0323 | 52.4359 |
| genus. RuminococcaceaeUCG011. id. 11368 | IschemicStroke      | Weighted median           | 6 | 0.9171 | 0.8470 | 0.9929 | 0.0326 | 0.0043 | 0.0430 | 0.9254 | #####  | 0.0323 | 52.4359 |
| genus. RuminococcaceaeUCG011. id. 11368 | IschemicStroke      | Inverse variance weighted | 6 | 0.9304 | 0.8631 | 1.0029 | 0.0596 | 0.0043 | 0.0430 | 0.9254 | #####  | 0.0323 | 52.4359 |
| genus. RuminococcaceaeUCG011. id. 11368 | IschemicStroke      | Simple mode               | 6 | 0.8674 | 0.7566 | 0.9945 | 0.0969 | 0.0043 | 0.0430 | 0.9254 | #####  | 0.0323 | 52.4359 |
| genus. RuminococcaceaeUCG011. id. 11368 | IschemicStroke      | Weighted mode             | 6 | 0.8734 | 0.7529 | 1.0130 | 0.1337 | 0.0043 | 0.0430 | 0.9254 | #####  | 0.0323 | 52.4359 |
| genus. RuminococcaceaeUCG011. id. 11368 | LargeArteryStroke   | MR Egger                  | 6 | 0.9683 | 0.2145 | 4.3714 | 0.9686 | 0.0095 | 0.0966 | 0.9267 | 5.5409 | 0.2362 | 25.1859 |
| genus. RuminococcaceaeUCG011. id. 11368 | LargeArteryStroke   | Weighted median           | 6 | 1.0583 | 0.8587 | 1.3042 | 0.5953 | 0.0095 | 0.0966 | 0.9267 | 5.5409 | 0.2362 | 25.1859 |
| genus. RuminococcaceaeUCG011. id. 11368 | LargeArteryStroke   | Inverse variance weighted | 6 | 1.0435 | 0.8819 | 1.2347 | 0.6199 | 0.0095 | 0.0966 | 0.9267 | 5.5409 | 0.2362 | 25.1859 |
| genus. RuminococcaceaeUCG011. id. 11368 | LargeArteryStroke   | Simple mode               | 6 | 1.1500 | 0.8265 | 1.6001 | 0.4447 | 0.0095 | 0.0966 | 0.9267 | 5.5409 | 0.2362 | 25.1859 |
| genus. RuminococcaceaeUCG011. id. 11368 | LargeArteryStroke   | Weighted mode             | 6 | 1.1232 | 0.8119 | 1.5539 | 0.5142 | 0.0095 | 0.0966 | 0.9267 | 5.5409 | 0.2362 | 25.1859 |
| genus. RuminococcaceaeUCG011. id. 11368 | SmallVesselStroke   | MR Egger                  | 6 | 0.6815 | 0.1696 | 2.7391 | 0.6177 | 0.0519 | 0.0892 | 0.5920 | 5.5435 | 0.2359 | 28.0604 |
| genus. RuminococcaceaeUCG011. id. 11368 | SmallVesselStroke   | Weighted median           | 6 | 0.9265 | 0.7581 | 1.1322 | 0.4555 | 0.0519 | 0.0892 | 0.5920 | 5.5435 | 0.2359 | 28.0604 |
| genus. RuminococcaceaeUCG011. id. 11368 | SmallVesselStroke   | Inverse variance weighted | 6 | 1.0265 | 0.8733 | 1.2066 | 0.7511 | 0.0519 | 0.0892 | 0.5920 | 5.5435 | 0.2359 | 28.0604 |
| genus. RuminococcaceaeUCG011. id. 11368 | SmallVesselStroke   | Simple mode               | 6 | 0.9052 | 0.6691 | 1.2246 | 0.5468 | 0.0519 | 0.0892 | 0.5920 | 5.5435 | 0.2359 | 28.0604 |
| genus. RuminococcaceaeUCG011. id. 11368 | SmallVesselStroke   | Weighted mode             | 6 | 0.9024 | 0.6896 | 1.1810 | 0.4881 | 0.0519 | 0.0892 | 0.5920 | 5.5435 | 0.2359 | 28.0604 |
| genus. RuminococcaceaeUCG011. id. 11368 | Stroke              | MR Egger                  | 6 | 0.7320 | 0.3949 | 1.3568 | 0.3778 | 0.0289 | 0.0395 | 0.5044 | #####  | 0.0358 | 46.8724 |
| genus. RuminococcaceaeUCG011. id. 11368 | Stroke              | Weighted median           | 6 | 0.8846 | 0.8225 | 0.9514 | 0.0010 | 0.0289 | 0.0395 | 0.5044 | #####  | 0.0358 | 46.8724 |
| genus. RuminococcaceaeUCG011. id. 11368 | Stroke              | Inverse variance weighted | 6 | 0.9202 | 0.8553 | 0.9900 | 0.0258 | 0.0289 | 0.0395 | 0.5044 | #####  | 0.0358 | 46.8724 |
| genus. RuminococcaceaeUCG011. id. 11368 | Stroke              | Simple mode               | 6 | 0.8678 | 0.7687 | 0.9796 | 0.0703 | 0.0289 | 0.0395 | 0.5044 | #####  | 0.0358 | 46.8724 |
| genus. RuminococcaceaeUCG011. id. 11368 | Stroke              | Weighted mode             | 6 | 0.8707 | 0.7622 | 0.9946 | 0.0968 | 0.0289 | 0.0395 | 0.5044 | #####  | 0.0358 | 46.8724 |
| genus. RuminococcaceaeUCG013. id. 11370 | CardioEmbolicStroke | MR Egger                  | 4 | 0.3169 | 0.0115 | 8.6953 | 0.5666 | 0.0590 | 0.0969 | 0.6045 | 2.8623 | 0.2390 | 6.3922  |
| genus. RuminococcaceaeUCG013. id. 11370 | CardioEmbolicStroke | Weighted median           | 4 | 0.9270 | 0.6347 | 1.3539 | 0.6948 | 0.0590 | 0.0969 | 0.6045 | 2.8623 | 0.2390 | 6.3922  |
| genus. RuminococcaceaeUCG013. id. 11370 | CardioEmbolicStroke | Inverse variance weighted | 4 | 0.8811 | 0.6341 | 1.2245 | 0.4510 | 0.0590 | 0.0969 | 0.6045 | 2.8623 | 0.2390 | 6.3922  |
| genus. RuminococcaceaeUCG013. id. 11370 | CardioEmbolicStroke | Simple mode               | 4 | 1.1470 | 0.6033 | 2.1806 | 0.7039 | 0.0590 | 0.0969 | 0.6045 | 2.8623 | 0.2390 | 6.3922  |

|                                        |                     |                           |   |        |        |         |        |         |        |        |        |        |         |
|----------------------------------------|---------------------|---------------------------|---|--------|--------|---------|--------|---------|--------|--------|--------|--------|---------|
| genus. RuminococcaceaeUG013. id. 11370 | CardioEmbolicStroke | Weighted mode             | 4 | 0.7277 | 0.4155 | 1.2747  | 0.3475 | 0.0590  | 0.0969 | 0.6045 | 2.8623 | 0.2390 | 6.3922  |
| genus. RuminococcaceaeUG013. id. 11370 | IschemicStroke      | MR Egger                  | 4 | 0.2968 | 0.0861 | 1.0232  | 0.1943 | 0.0715  | 0.0363 | 0.1878 | 4.4108 | 0.2204 | 19.0704 |
| genus. RuminococcaceaeUG013. id. 11370 | IschemicStroke      | Weighted median           | 4 | 1.0399 | 0.8644 | 1.2512  | 0.6780 | 0.0715  | 0.0363 | 0.1878 | 4.4108 | 0.2204 | 19.0704 |
| genus. RuminococcaceaeUG013. id. 11370 | IschemicStroke      | Inverse variance weighted | 4 | 1.0213 | 0.8663 | 1.2041  | 0.8018 | 0.0715  | 0.0363 | 0.1878 | 4.4108 | 0.2204 | 19.0704 |
| genus. RuminococcaceaeUG013. id. 11370 | IschemicStroke      | Simple mode               | 4 | 1.0335 | 0.7838 | 1.3627  | 0.8305 | 0.0715  | 0.0363 | 0.1878 | 4.4108 | 0.2204 | 19.0704 |
| genus. RuminococcaceaeUG013. id. 11370 | IschemicStroke      | Weighted mode             | 4 | 1.0067 | 0.7932 | 1.2777  | 0.9596 | 0.0715  | 0.0363 | 0.1878 | 4.4108 | 0.2204 | 19.0704 |
| genus. RuminococcaceaeUG013. id. 11370 | LargeArteryStroke   | MR Egger                  | 4 | 0.0666 | 0.0016 | 2.7125  | 0.2884 | 0.1606  | 0.1087 | 0.2778 | 3.5579 | 0.3133 | 5.2920  |
| genus. RuminococcaceaeUG013. id. 11370 | LargeArteryStroke   | Weighted median           | 4 | 0.9104 | 0.5437 | 1.5244  | 0.7211 | 0.1606  | 0.1087 | 0.2778 | 3.5579 | 0.3133 | 5.2920  |
| genus. RuminococcaceaeUG013. id. 11370 | LargeArteryStroke   | Inverse variance weighted | 4 | 1.0681 | 0.6780 | 1.6826  | 0.7763 | 0.1606  | 0.1087 | 0.2778 | 3.5579 | 0.3133 | 5.2920  |
| genus. RuminococcaceaeUG013. id. 11370 | LargeArteryStroke   | Simple mode               | 4 | 0.8107 | 0.3659 | 1.7962  | 0.6408 | 0.1606  | 0.1087 | 0.2778 | 3.5579 | 0.3133 | 5.2920  |
| genus. RuminococcaceaeUG013. id. 11370 | LargeArteryStroke   | Weighted mode             | 4 | 0.8107 | 0.4420 | 1.4867  | 0.5462 | 0.1606  | 0.1087 | 0.2778 | 3.5579 | 0.3133 | 5.2920  |
| genus. RuminococcaceaeUG013. id. 11370 | SmallVesselStroke   | MR Egger                  | 4 | 0.4671 | 0.0039 | 55.6534 | 0.7845 | 0.0411  | 0.1398 | 0.7964 | 3.8277 | 0.1475 | 4.4899  |
| genus. RuminococcaceaeUG013. id. 11370 | SmallVesselStroke   | Weighted median           | 4 | 1.0515 | 0.6461 | 1.7113  | 0.8397 | 0.0411  | 0.1398 | 0.7964 | 3.8277 | 0.1475 | 4.4899  |
| genus. RuminococcaceaeUG013. id. 11370 | SmallVesselStroke   | Inverse variance weighted | 4 | 0.9529 | 0.6116 | 1.4848  | 0.8312 | 0.0411  | 0.1398 | 0.7964 | 3.8277 | 0.1475 | 4.4899  |
| genus. RuminococcaceaeUG013. id. 11370 | SmallVesselStroke   | Simple mode               | 4 | 1.2958 | 0.6293 | 2.6681  | 0.5326 | 0.0411  | 0.1398 | 0.7964 | 3.8277 | 0.1475 | 4.4899  |
| genus. RuminococcaceaeUG013. id. 11370 | SmallVesselStroke   | Weighted mode             | 4 | 1.2020 | 0.6317 | 2.2873  | 0.6142 | 0.0411  | 0.1398 | 0.7964 | 3.8277 | 0.1475 | 4.4899  |
| genus. RuminococcaceaeUG013. id. 11370 | Stroke              | MR Egger                  | 4 | 0.7569 | 0.2351 | 2.4366  | 0.6864 | 0.0194  | 0.0344 | 0.6289 | 1.5096 | 0.4701 | 26.5879 |
| genus. RuminococcaceaeUG013. id. 11370 | Stroke              | Weighted median           | 4 | 1.0534 | 0.8977 | 1.2361  | 0.5237 | 0.0194  | 0.0344 | 0.6289 | 1.5096 | 0.4701 | 26.5879 |
| genus. RuminococcaceaeUG013. id. 11370 | Stroke              | Inverse variance weighted | 4 | 1.0581 | 0.9311 | 1.2026  | 0.3866 | 0.0194  | 0.0344 | 0.6289 | 1.5096 | 0.4701 | 26.5879 |
| genus. RuminococcaceaeUG013. id. 11370 | Stroke              | Simple mode               | 4 | 1.1260 | 0.9125 | 1.3894  | 0.3494 | 0.0194  | 0.0344 | 0.6289 | 1.5096 | 0.4701 | 26.5879 |
| genus. RuminococcaceaeUG013. id. 11370 | Stroke              | Weighted mode             | 4 | 1.0187 | 0.8414 | 1.2333  | 0.8617 | 0.0194  | 0.0344 | 0.6289 | 1.5096 | 0.4701 | 26.5879 |
| genus. RuminococcaceaeUG014. id. 11371 | CardioEmbolicStroke | Inverse variance weighted | 2 | 0.8893 | 0.5867 | 1.3478  | 0.5802 | NA      | NA     | NA     | 0.2012 | 0.6537 | 13.7722 |
| genus. RuminococcaceaeUG014. id. 11371 | IschemicStroke      | Inverse variance weighted | 2 | 0.7870 | 0.6564 | 0.9436  | 0.0097 | NA      | NA     | NA     | 0.3270 | 0.5674 | 10.7894 |
| genus. RuminococcaceaeUG014. id. 11371 | LargeArteryStroke   | Inverse variance weighted | 2 | 0.5202 | 0.2736 | 0.9891  | 0.0462 | NA      | NA     | NA     | 1.3462 | 0.2459 | 2.7093  |
| genus. RuminococcaceaeUG014. id. 11371 | SmallVesselStroke   | Inverse variance weighted | 2 | 0.6422 | 0.3821 | 1.0792  | 0.0945 | NA      | NA     | NA     | 0.2080 | 0.6483 | 4.8059  |
| genus. RuminococcaceaeUG014. id. 11371 | Stroke              | Inverse variance weighted | 2 | 0.7520 | 0.6356 | 0.8898  | 0.0009 | NA      | NA     | NA     | 0.0663 | 0.7968 | 8.0245  |
| genus. Ruminococcusl. id. 11373        | CardioEmbolicStroke | MR Egger                  | 4 | 2.9534 | 0.7672 | 11.3695 | 0.2560 | -0.0608 | 0.0469 | 0.3247 | #####  | 0.0062 | 1.7647  |
| genus. Ruminococcusl. id. 11373        | CardioEmbolicStroke | Weighted median           | 4 | 1.1435 | 0.7501 | 1.7431  | 0.5330 | -0.0608 | 0.0469 | 0.3247 | #####  | 0.0062 | 1.7647  |
| genus. Ruminococcusl. id. 11373        | CardioEmbolicStroke | Inverse variance weighted | 4 | 1.3115 | 0.7100 | 2.4226  | 0.3864 | -0.0608 | 0.0469 | 0.3247 | #####  | 0.0062 | 1.7647  |
| genus. Ruminococcusl. id. 11373        | CardioEmbolicStroke | Simple mode               | 4 | 0.8278 | 0.3261 | 2.1013  | 0.7175 | -0.0608 | 0.0469 | 0.3247 | #####  | 0.0062 | 1.7647  |
| genus. Ruminococcusl. id. 11373        | CardioEmbolicStroke | Weighted mode             | 4 | 0.8464 | 0.3395 | 2.1102  | 0.7443 | -0.0608 | 0.0469 | 0.3247 | #####  | 0.0062 | 1.7647  |
| genus. Ruminococcusl. id. 11373        | IschemicStroke      | MR Egger                  | 4 | 1.5772 | 1.1399 | 2.1822  | 0.1107 | -0.0323 | 0.0115 | 0.1058 | #####  | 0.0123 | 10.8142 |
| genus. Ruminococcusl. id. 11373        | IschemicStroke      | Weighted median           | 4 | 0.9065 | 0.7516 | 1.0932  | 0.3043 | -0.0323 | 0.0115 | 0.1058 | #####  | 0.0123 | 10.8142 |
| genus. Ruminococcusl. id. 11373        | IschemicStroke      | Inverse variance weighted | 4 | 1.0305 | 0.8058 | 1.3178  | 0.8110 | -0.0323 | 0.0115 | 0.1058 | #####  | 0.0123 | 10.8142 |
| genus. Ruminococcusl. id. 11373        | IschemicStroke      | Simple mode               | 4 | 0.8493 | 0.6722 | 1.0730  | 0.2644 | -0.0323 | 0.0115 | 0.1058 | #####  | 0.0123 | 10.8142 |
| genus. Ruminococcusl. id. 11373        | IschemicStroke      | Weighted mode             | 4 | 0.8531 | 0.6471 | 1.1247  | 0.3419 | -0.0323 | 0.0115 | 0.1058 | #####  | 0.0123 | 10.8142 |
| genus. Ruminococcusl. id. 11373        | LargeArteryStroke   | MR Egger                  | 4 | 1.7492 | 0.2484 | 12.3163 | 0.6310 | -0.0515 | 0.0655 | 0.5145 | 8.4644 | 0.0373 | 5.8172  |
| genus. Ruminococcusl. id. 11373        | LargeArteryStroke   | Weighted median           | 4 | 1.0099 | 0.5668 | 1.7994  | 0.9733 | -0.0515 | 0.0655 | 0.5145 | 8.4644 | 0.0373 | 5.8172  |
| genus. Ruminococcusl. id. 11373        | LargeArteryStroke   | Inverse variance weighted | 4 | 0.8509 | 0.4193 | 1.7266  | 0.6546 | -0.0515 | 0.0655 | 0.5145 | 8.4644 | 0.0373 | 5.8172  |
| genus. Ruminococcusl. id. 11373        | LargeArteryStroke   | Simple mode               | 4 | 1.0961 | 0.4678 | 2.5685  | 0.8462 | -0.0515 | 0.0655 | 0.5145 | 8.4644 | 0.0373 | 5.8172  |
| genus. Ruminococcusl. id. 11373        | LargeArteryStroke   | Weighted mode             | 4 | 1.0607 | 0.5101 | 2.2056  | 0.8846 | -0.0515 | 0.0655 | 0.5145 | 8.4644 | 0.0373 | 5.8172  |
| genus. Ruminococcusl. id. 11373        | SmallVesselStroke   | MR Egger                  | 4 | 1.5287 | 0.5743 | 4.0691  | 0.4849 | -0.0258 | 0.0333 | 0.5193 | 1.4957 | 0.4734 | 11.7377 |
| genus. Ruminococcusl. id. 11373        | SmallVesselStroke   | Weighted median           | 4 | 1.0744 | 0.6885 | 1.6766  | 0.7521 | -0.0258 | 0.0333 | 0.5193 | 1.4957 | 0.4734 | 11.7377 |
| genus. Ruminococcusl. id. 11373        | SmallVesselStroke   | Inverse variance weighted | 4 | 1.0710 | 0.7281 | 1.5754  | 0.7276 | -0.0258 | 0.0333 | 0.5193 | 1.4957 | 0.4734 | 11.7377 |
| genus. Ruminococcusl. id. 11373        | SmallVesselStroke   | Simple mode               | 4 | 1.0620 | 0.5719 | 1.9723  | 0.8610 | -0.0258 | 0.0333 | 0.5193 | 1.4957 | 0.4734 | 11.7377 |
| genus. Ruminococcusl. id. 11373        | SmallVesselStroke   | Weighted mode             | 4 | 1.0720 | 0.5961 | 1.9280  | 0.8313 | -0.0258 | 0.0333 | 0.5193 | 1.4957 | 0.4734 | 11.7377 |
| genus. Ruminococcusl. id. 11373        | Stroke              | MR Egger                  | 4 | 1.6230 | 1.2149 | 2.1683  | 0.0818 | -0.0347 | 0.0102 | 0.0768 | #####  | 0.0047 | 10.6603 |
| genus. Ruminococcusl. id. 11373        | Stroke              | Weighted median           | 4 | 0.8758 | 0.7315 | 1.0487  | 0.1491 | -0.0347 | 0.0102 | 0.0768 | #####  | 0.0047 | 10.6603 |
| genus. Ruminococcusl. id. 11373        | Stroke              | Inverse variance weighted | 4 | 1.0279 | 0.8005 | 1.3198  | 0.8292 | -0.0347 | 0.0102 | 0.0768 | #####  | 0.0047 | 10.6603 |
| genus. Ruminococcusl. id. 11373        | Stroke              | Simple mode               | 4 | 0.8643 | 0.7166 | 1.0425  | 0.2247 | -0.0347 | 0.0102 | 0.0768 | #####  | 0.0047 | 10.6603 |
| genus. Ruminococcusl. id. 11373        | Stroke              | Weighted mode             | 4 | 0.8633 | 0.6912 | 1.0784  | 0.2861 | -0.0347 | 0.0102 | 0.0768 | #####  | 0.0047 | 10.6603 |
| genus. Sellimonas. id. 14369           | CardioEmbolicStroke | Inverse variance weighted | 2 | 0.9209 | 0.7373 | 1.1503  | 0.4677 | NA      | NA     | NA     | 0.0026 | 0.9592 | 46.7031 |
| genus. Sellimonas. id. 14369           | IschemicStroke      | Inverse variance weighted | 2 | 1.0457 | 0.9480 | 1.1535  | 0.3720 | NA      | NA     | NA     | 0.3425 | 0.5584 | 76.3234 |
| genus. Sellimonas. id. 14369           | LargeArteryStroke   | Inverse variance weighted | 2 | 1.2511 | 0.9283 | 1.6859  | 0.1411 | NA      | NA     | NA     | 0.0000 | 0.9991 | 13.5960 |

|                                |                     |                           |   |        |        |         |        |         |        |        |        |        |         |
|--------------------------------|---------------------|---------------------------|---|--------|--------|---------|--------|---------|--------|--------|--------|--------|---------|
| genus. Sellimonas. id. 14369   | SmallVesselStroke   | Inverse variance weighted | 2 | 1.1356 | 0.8640 | 1.4925  | 0.3619 | NA      | NA     | NA     | 0.3062 | 0.5800 | 23.2134 |
| genus. Sellimonas. id. 14369   | Stroke              | Inverse variance weighted | 2 | 1.0434 | 0.9523 | 1.1432  | 0.3620 | NA      | NA     | NA     | 0.0002 | 0.9899 | 97.6127 |
| genus. Slackia. id. 825        | CardioEmbolicStroke | Inverse variance weighted | 2 | 1.0588 | 0.8135 | 1.3780  | 0.6708 | NA      | NA     | NA     | 0.9102 | 0.3401 | 25.0955 |
| genus. Slackia. id. 825        | IschemicStroke      | Inverse variance weighted | 2 | 1.0173 | 0.9042 | 1.1444  | 0.7758 | NA      | NA     | NA     | 0.7537 | 0.3853 | 70.7739 |
| genus. Slackia. id. 825        | LargeArteryStroke   | Inverse variance weighted | 2 | 1.1108 | 0.7841 | 1.5735  | 0.5543 | NA      | NA     | NA     | 0.1303 | 0.7181 | 29.8262 |
| genus. Slackia. id. 825        | SmallVesselStroke   | Inverse variance weighted | 2 | 1.2581 | 0.7085 | 2.2338  | 0.4332 | NA      | NA     | NA     | 3.1119 | 0.0777 | 7.5046  |
| genus. Slackia. id. 825        | Stroke              | Inverse variance weighted | 2 | 1.0058 | 0.9000 | 1.1240  | 0.9188 | NA      | NA     | NA     | 1.0455 | 0.3066 | 63.8867 |
| genus. Streptococcus. id. 1853 | CardioEmbolicStroke | MR Egger                  | 8 | 0.9051 | 0.4369 | 1.8749  | 0.7974 | 0.0189  | 0.0306 | 0.5603 | 4.3855 | 0.6247 | 12.5055 |
| genus. Streptococcus. id. 1853 | CardioEmbolicStroke | Weighted median           | 8 | 1.0491 | 0.7638 | 1.4409  | 0.7672 | 0.0189  | 0.0306 | 0.5603 | 4.3855 | 0.6247 | 12.5055 |
| genus. Streptococcus. id. 1853 | CardioEmbolicStroke | Inverse variance weighted | 8 | 1.1252 | 0.8974 | 1.4109  | 0.3068 | 0.0189  | 0.0306 | 0.5603 | 4.3855 | 0.6247 | 12.5055 |
| genus. Streptococcus. id. 1853 | CardioEmbolicStroke | Simple mode               | 8 | 0.9806 | 0.6197 | 1.5517  | 0.9357 | 0.0189  | 0.0306 | 0.5603 | 4.3855 | 0.6247 | 12.5055 |
| genus. Streptococcus. id. 1853 | CardioEmbolicStroke | Weighted mode             | 8 | 1.0127 | 0.6735 | 1.5227  | 0.9534 | 0.0189  | 0.0306 | 0.5603 | 4.3855 | 0.6247 | 12.5055 |
| genus. Streptococcus. id. 1853 | IschemicStroke      | MR Egger                  | 8 | 0.7150 | 0.5190 | 0.9851  | 0.0860 | 0.0294  | 0.0136 | 0.0745 | 9.8941 | 0.1947 | 39.1231 |
| genus. Streptococcus. id. 1853 | IschemicStroke      | Weighted median           | 8 | 0.9849 | 0.8591 | 1.1290  | 0.8267 | 0.0294  | 0.0136 | 0.0745 | 9.8941 | 0.1947 | 39.1231 |
| genus. Streptococcus. id. 1853 | IschemicStroke      | Inverse variance weighted | 8 | 1.0006 | 0.8919 | 1.1226  | 0.9914 | 0.0294  | 0.0136 | 0.0745 | 9.8941 | 0.1947 | 39.1231 |
| genus. Streptococcus. id. 1853 | IschemicStroke      | Simple mode               | 8 | 0.9430 | 0.7829 | 1.1358  | 0.5558 | 0.0294  | 0.0136 | 0.0745 | 9.8941 | 0.1947 | 39.1231 |
| genus. Streptococcus. id. 1853 | IschemicStroke      | Weighted mode             | 8 | 0.9846 | 0.8247 | 1.1756  | 0.8687 | 0.0294  | 0.0136 | 0.0745 | 9.8941 | 0.1947 | 39.1231 |
| genus. Streptococcus. id. 1853 | LargeArteryStroke   | MR Egger                  | 8 | 0.7705 | 0.2921 | 2.0324  | 0.6172 | -0.0005 | 0.0408 | 0.9913 | 3.7178 | 0.7148 | 8.1602  |
| genus. Streptococcus. id. 1853 | LargeArteryStroke   | Weighted median           | 8 | 0.8272 | 0.5499 | 1.2443  | 0.3624 | -0.0005 | 0.0408 | 0.9913 | 3.7178 | 0.7148 | 8.1602  |
| genus. Streptococcus. id. 1853 | LargeArteryStroke   | Inverse variance weighted | 8 | 0.7664 | 0.5641 | 1.0413  | 0.0889 | -0.0005 | 0.0408 | 0.9913 | 3.7178 | 0.7148 | 8.1602  |
| genus. Streptococcus. id. 1853 | LargeArteryStroke   | Simple mode               | 8 | 0.9980 | 0.5276 | 1.8875  | 0.9952 | -0.0005 | 0.0408 | 0.9913 | 3.7178 | 0.7148 | 8.1602  |
| genus. Streptococcus. id. 1853 | LargeArteryStroke   | Weighted mode             | 8 | 0.5766 | 0.3088 | 1.0767  | 0.1276 | -0.0005 | 0.0408 | 0.9913 | 3.7178 | 0.7148 | 8.1602  |
| genus. Streptococcus. id. 1853 | SmallVesselStroke   | MR Egger                  | 7 | 0.5397 | 0.1513 | 1.9255  | 0.3856 | 0.0662  | 0.0525 | 0.2629 | #####  | 0.0533 | 6.4035  |
| genus. Streptococcus. id. 1853 | SmallVesselStroke   | Weighted median           | 7 | 1.0868 | 0.7072 | 1.6703  | 0.7041 | 0.0662  | 0.0525 | 0.2629 | #####  | 0.0533 | 6.4035  |
| genus. Streptococcus. id. 1853 | SmallVesselStroke   | Inverse variance weighted | 7 | 1.1720 | 0.7653 | 1.7949  | 0.4655 | 0.0662  | 0.0525 | 0.2629 | #####  | 0.0533 | 6.4035  |
| genus. Streptococcus. id. 1853 | SmallVesselStroke   | Simple mode               | 7 | 0.8562 | 0.4179 | 1.7540  | 0.6860 | 0.0662  | 0.0525 | 0.2629 | #####  | 0.0533 | 6.4035  |
| genus. Streptococcus. id. 1853 | SmallVesselStroke   | Weighted mode             | 7 | 0.9652 | 0.5328 | 1.7485  | 0.9108 | 0.0662  | 0.0525 | 0.2629 | #####  | 0.0533 | 6.4035  |
| genus. Streptococcus. id. 1853 | Stroke              | MR Egger                  | 8 | 0.7207 | 0.5192 | 1.0004  | 0.0981 | 0.0290  | 0.0139 | 0.0822 | #####  | 0.0766 | 35.0818 |
| genus. Streptococcus. id. 1853 | Stroke              | Weighted median           | 8 | 1.0053 | 0.8922 | 1.1327  | 0.9311 | 0.0290  | 0.0139 | 0.0822 | #####  | 0.0766 | 35.0818 |
| genus. Streptococcus. id. 1853 | Stroke              | Inverse variance weighted | 8 | 1.0052 | 0.8918 | 1.1329  | 0.9327 | 0.0290  | 0.0139 | 0.0822 | #####  | 0.0766 | 35.0818 |
| genus. Streptococcus. id. 1853 | Stroke              | Simple mode               | 8 | 1.0109 | 0.8543 | 1.1961  | 0.9032 | 0.0290  | 0.0139 | 0.0822 | #####  | 0.0766 | 35.0818 |
| genus. Streptococcus. id. 1853 | Stroke              | Weighted mode             | 8 | 1.0109 | 0.8595 | 1.1890  | 0.8996 | 0.0290  | 0.0139 | 0.0822 | #####  | 0.0766 | 35.0818 |
| genus. Turicibacter. id. 2162  | CardioEmbolicStroke | MR Egger                  | 3 | 0.9110 | 0.0893 | 9.2881  | 0.9500 | 0.0549  | 0.1339 | 0.7523 | 0.1752 | 0.9161 | 6.4856  |
| genus. Turicibacter. id. 2162  | CardioEmbolicStroke | Weighted median           | 3 | 1.4519 | 1.0266 | 2.0534  | 0.0350 | 0.0549  | 0.1339 | 0.7523 | 0.1752 | 0.9161 | 6.4856  |
| genus. Turicibacter. id. 2162  | CardioEmbolicStroke | Inverse variance weighted | 3 | 1.4757 | 1.1271 | 1.9320  | 0.0046 | 0.0549  | 0.1339 | 0.7523 | 0.1752 | 0.9161 | 6.4856  |
| genus. Turicibacter. id. 2162  | CardioEmbolicStroke | Simple mode               | 3 | 1.4388 | 1.0070 | 2.0558  | 0.1838 | 0.0549  | 0.1339 | 0.7523 | 0.1752 | 0.9161 | 6.4856  |
| genus. Turicibacter. id. 2162  | CardioEmbolicStroke | Weighted mode             | 3 | 1.4256 | 0.9832 | 2.0672  | 0.2023 | 0.0549  | 0.1339 | 0.7523 | 0.1752 | 0.9161 | 6.4856  |
| genus. Turicibacter. id. 2162  | IschemicStroke      | MR Egger                  | 3 | 1.2566 | 0.2882 | 5.4790  | 0.8121 | -0.0148 | 0.0857 | 0.8909 | 2.2893 | 0.1303 | 24.2377 |
| genus. Turicibacter. id. 2162  | IschemicStroke      | Weighted median           | 3 | 1.0696 | 0.9267 | 1.2347  | 0.3578 | -0.0148 | 0.0857 | 0.8909 | 2.2893 | 0.1303 | 24.2377 |
| genus. Turicibacter. id. 2162  | IschemicStroke      | Inverse variance weighted | 3 | 1.1044 | 0.9752 | 1.2506  | 0.1176 | -0.0148 | 0.0857 | 0.8909 | 2.2893 | 0.1303 | 24.2377 |
| genus. Turicibacter. id. 2162  | IschemicStroke      | Simple mode               | 3 | 1.0488 | 0.8867 | 1.2406  | 0.6338 | -0.0148 | 0.0857 | 0.8909 | 2.2893 | 0.1303 | 24.2377 |
| genus. Turicibacter. id. 2162  | IschemicStroke      | Weighted mode             | 3 | 1.0542 | 0.8965 | 1.2395  | 0.5886 | -0.0148 | 0.0857 | 0.8909 | 2.2893 | 0.1303 | 24.2377 |
| genus. Turicibacter. id. 2162  | LargeArteryStroke   | MR Egger                  | 3 | 3.7878 | 0.1629 | 88.0782 | 0.5591 | -0.1396 | 0.1813 | 0.5823 | 0.2128 | 0.6446 | 15.7568 |
| genus. Turicibacter. id. 2162  | LargeArteryStroke   | Weighted median           | 3 | 1.0567 | 0.6792 | 1.6439  | 0.8069 | -0.1396 | 0.1813 | 0.5823 | 0.2128 | 0.6446 | 15.7568 |
| genus. Turicibacter. id. 2162  | LargeArteryStroke   | Inverse variance weighted | 3 | 1.1100 | 0.7660 | 1.6084  | 0.5813 | -0.1396 | 0.1813 | 0.5823 | 0.2128 | 0.6446 | 15.7568 |
| genus. Turicibacter. id. 2162  | LargeArteryStroke   | Simple mode               | 3 | 0.9604 | 0.5381 | 1.7142  | 0.9038 | -0.1396 | 0.1813 | 0.5823 | 0.2128 | 0.6446 | 15.7568 |
| genus. Turicibacter. id. 2162  | LargeArteryStroke   | Weighted mode             | 3 | 0.9680 | 0.5688 | 1.6473  | 0.9154 | -0.1396 | 0.1813 | 0.5823 | 0.2128 | 0.6446 | 15.7568 |
| genus. Turicibacter. id. 2162  | SmallVesselStroke   | MR Egger                  | 3 | 0.7206 | 0.0393 | 13.2232 | 0.8617 | 0.0521  | 0.1677 | 0.8082 | 0.9906 | 0.3196 | 15.9596 |
| genus. Turicibacter. id. 2162  | SmallVesselStroke   | Weighted median           | 3 | 1.1821 | 0.7899 | 1.7689  | 0.4161 | 0.0521  | 0.1677 | 0.8082 | 0.9906 | 0.3196 | 15.9596 |
| genus. Turicibacter. id. 2162  | SmallVesselStroke   | Inverse variance weighted | 3 | 1.1396 | 0.8146 | 1.5943  | 0.4455 | 0.0521  | 0.1677 | 0.8082 | 0.9906 | 0.3196 | 15.9596 |
| genus. Turicibacter. id. 2162  | SmallVesselStroke   | Simple mode               | 3 | 1.2283 | 0.7591 | 1.9874  | 0.4904 | 0.0521  | 0.1677 | 0.8082 | 0.9906 | 0.3196 | 15.9596 |
| genus. Turicibacter. id. 2162  | SmallVesselStroke   | Weighted mode             | 3 | 1.2248 | 0.7526 | 1.9933  | 0.5002 | 0.0521  | 0.1677 | 0.8082 | 0.9906 | 0.3196 | 15.9596 |
| genus. Turicibacter. id. 2162  | Stroke              | MR Egger                  | 3 | 0.9955 | 0.4051 | 2.4462  | 0.9938 | 0.0131  | 0.0522 | 0.8434 | 0.9229 | 0.3367 | 28.3992 |
| genus. Turicibacter. id. 2162  | Stroke              | Weighted median           | 3 | 1.0874 | 0.9545 | 1.2387  | 0.2079 | 0.0131  | 0.0522 | 0.8434 | 0.9229 | 0.3367 | 28.3992 |

|                                     |                     |                           |   |        |        |        |        |         |        |        |        |        |          |
|-------------------------------------|---------------------|---------------------------|---|--------|--------|--------|--------|---------|--------|--------|--------|--------|----------|
| genus. Turicibacter. id. 2162       | Stroke              | Inverse variance weighted | 3 | 1.1161 | 1.0043 | 1.2404 | 0.0414 | 0.0131  | 0.0522 | 0.8434 | 0.9229 | 0.3367 | 28.3992  |
| genus. Turicibacter. id. 2162       | Stroke              | Simple mode               | 3 | 1.0833 | 0.9283 | 1.2643 | 0.4166 | 0.0131  | 0.0522 | 0.8434 | 0.9229 | 0.3367 | 28.3992  |
| genus. Turicibacter. id. 2162       | Stroke              | Weighted mode             | 3 | 1.0819 | 0.9362 | 1.2502 | 0.3980 | 0.0131  | 0.0522 | 0.8434 | 0.9229 | 0.3367 | 28.3992  |
| genus. Victivallis. id. 2256        | CardioEmbolicStroke | Inverse variance weighted | 2 | 1.0559 | 0.8595 | 1.2972 | 0.6044 | NA      | NA     | NA     | 0.1559 | 0.6929 | 47.6716  |
| genus. Victivallis. id. 2256        | IschemicStroke      | Inverse variance weighted | 2 | 0.9476 | 0.8663 | 1.0365 | 0.2396 | NA      | NA     | NA     | 0.5084 | 0.4758 | 53.3416  |
| genus. Victivallis. id. 2256        | LargeArteryStroke   | Inverse variance weighted | 2 | 0.8412 | 0.6392 | 1.1071 | 0.2173 | NA      | NA     | NA     | 0.3537 | 0.5520 | 13.9432  |
| genus. Victivallis. id. 2256        | SmallVesselStroke   | Inverse variance weighted | 2 | 0.7031 | 0.5447 | 0.9076 | 0.0068 | NA      | NA     | NA     | 0.0021 | 0.9633 | 6.9248   |
| genus. Victivallis. id. 2256        | Stroke              | Inverse variance weighted | 2 | 0.9678 | 0.8905 | 1.0518 | 0.4406 | NA      | NA     | NA     | 0.4244 | 0.5148 | 80.5237  |
| genus. unknowngenus. id. 1000000073 | CardioEmbolicStroke | MR Egger                  | 3 | 2.6235 | 0.7782 | 8.8442 | 0.3637 | -0.0709 | 0.0521 | 0.4037 | 1.8639 | 0.3938 | 7.4836   |
| genus. unknowngenus. id. 1000000073 | CardioEmbolicStroke | Weighted median           | 3 | 1.0197 | 0.6949 | 1.4964 | 0.9204 | -0.0709 | 0.0521 | 0.4037 | 1.8639 | 0.3938 | 7.4836   |
| genus. unknowngenus. id. 1000000073 | CardioEmbolicStroke | Inverse variance weighted | 3 | 1.1571 | 0.8657 | 1.5465 | 0.3242 | -0.0709 | 0.0521 | 0.4037 | 1.8639 | 0.3938 | 7.4836   |
| genus. unknowngenus. id. 1000000073 | CardioEmbolicStroke | Simple mode               | 3 | 0.9965 | 0.6421 | 1.5464 | 0.9889 | -0.0709 | 0.0521 | 0.4037 | 1.8639 | 0.3938 | 7.4836   |
| genus. unknowngenus. id. 1000000073 | CardioEmbolicStroke | Weighted mode             | 3 | 0.9978 | 0.6409 | 1.5534 | 0.9931 | -0.0709 | 0.0521 | 0.4037 | 1.8639 | 0.3938 | 7.4836   |
| genus. unknowngenus. id. 1000000073 | IschemicStroke      | MR Egger                  | 3 | 1.4225 | 0.8222 | 2.4610 | 0.4271 | -0.0386 | 0.0234 | 0.3477 | 2.7277 | 0.2557 | 28.7386  |
| genus. unknowngenus. id. 1000000073 | IschemicStroke      | Weighted median           | 3 | 0.8658 | 0.7316 | 1.0247 | 0.0936 | -0.0386 | 0.0234 | 0.3477 | 2.7277 | 0.2557 | 28.7386  |
| genus. unknowngenus. id. 1000000073 | IschemicStroke      | Inverse variance weighted | 3 | 0.9097 | 0.7817 | 1.0586 | 0.2211 | -0.0386 | 0.0234 | 0.3477 | 2.7277 | 0.2557 | 28.7386  |
| genus. unknowngenus. id. 1000000073 | IschemicStroke      | Simple mode               | 3 | 0.8411 | 0.6658 | 1.0626 | 0.2838 | -0.0386 | 0.0234 | 0.3477 | 2.7277 | 0.2557 | 28.7386  |
| genus. unknowngenus. id. 1000000073 | IschemicStroke      | Weighted mode             | 3 | 0.8404 | 0.6688 | 1.0560 | 0.2742 | -0.0386 | 0.0234 | 0.3477 | 2.7277 | 0.2557 | 28.7386  |
| genus. unknowngenus. id. 1000000073 | LargeArteryStroke   | MR Egger                  | 3 | 1.7199 | 0.3392 | 8.7217 | 0.6310 | -0.0477 | 0.0695 | 0.6171 | 0.5225 | 0.7701 | 19.9700  |
| genus. unknowngenus. id. 1000000073 | LargeArteryStroke   | Weighted median           | 3 | 0.9534 | 0.5959 | 1.5252 | 0.8422 | -0.0477 | 0.0695 | 0.6171 | 0.5225 | 0.7701 | 19.9700  |
| genus. unknowngenus. id. 1000000073 | LargeArteryStroke   | Inverse variance weighted | 3 | 0.9902 | 0.6733 | 1.4563 | 0.9602 | -0.0477 | 0.0695 | 0.6171 | 0.5225 | 0.7701 | 19.9700  |
| genus. unknowngenus. id. 1000000073 | LargeArteryStroke   | Simple mode               | 3 | 0.9023 | 0.5085 | 1.6010 | 0.7589 | -0.0477 | 0.0695 | 0.6171 | 0.5225 | 0.7701 | 19.9700  |
| genus. unknowngenus. id. 1000000073 | LargeArteryStroke   | Weighted mode             | 3 | 0.9059 | 0.5184 | 1.5830 | 0.7616 | -0.0477 | 0.0695 | 0.6171 | 0.5225 | 0.7701 | 19.9700  |
| genus. unknowngenus. id. 1000000073 | SmallVesselStroke   | MR Egger                  | 3 | 0.4047 | 0.0841 | 1.9469 | 0.4616 | 0.0656  | 0.0668 | 0.5060 | 0.9695 | 0.6158 | 8.0275   |
| genus. unknowngenus. id. 1000000073 | SmallVesselStroke   | Weighted median           | 3 | 0.9688 | 0.6106 | 1.5371 | 0.8929 | 0.0656  | 0.0668 | 0.5060 | 0.9695 | 0.6158 | 8.0275   |
| genus. unknowngenus. id. 1000000073 | SmallVesselStroke   | Inverse variance weighted | 3 | 0.8695 | 0.6025 | 1.2550 | 0.4552 | 0.0656  | 0.0668 | 0.5060 | 0.9695 | 0.6158 | 8.0275   |
| genus. unknowngenus. id. 1000000073 | SmallVesselStroke   | Simple mode               | 3 | 0.9892 | 0.5940 | 1.6473 | 0.9705 | 0.0656  | 0.0668 | 0.5060 | 0.9695 | 0.6158 | 8.0275   |
| genus. unknowngenus. id. 1000000073 | SmallVesselStroke   | Weighted mode             | 3 | 0.9906 | 0.5830 | 1.6832 | 0.9753 | 0.0656  | 0.0668 | 0.5060 | 0.9695 | 0.6158 | 8.0275   |
| genus. unknowngenus. id. 1000000073 | Stroke              | MR Egger                  | 3 | 1.3793 | 0.8335 | 2.2823 | 0.4292 | -0.0387 | 0.0216 | 0.3238 | 3.2246 | 0.1994 | 25.2367  |
| genus. unknowngenus. id. 1000000073 | Stroke              | Weighted median           | 3 | 0.8420 | 0.7223 | 0.9814 | 0.0278 | -0.0387 | 0.0216 | 0.3238 | 3.2246 | 0.1994 | 25.2367  |
| genus. unknowngenus. id. 1000000073 | Stroke              | Inverse variance weighted | 3 | 0.8815 | 0.7572 | 1.0262 | 0.1037 | -0.0387 | 0.0216 | 0.3238 | 3.2246 | 0.1994 | 25.2367  |
| genus. unknowngenus. id. 1000000073 | Stroke              | Simple mode               | 3 | 0.8140 | 0.6455 | 1.0266 | 0.2243 | -0.0387 | 0.0216 | 0.3238 | 3.2246 | 0.1994 | 25.2367  |
| genus. unknowngenus. id. 1000000073 | Stroke              | Weighted mode             | 3 | 0.8135 | 0.6328 | 1.0457 | 0.2485 | -0.0387 | 0.0216 | 0.3238 | 3.2246 | 0.1994 | 25.2367  |
| genus. unknowngenus. id. 1000001215 | CardioEmbolicStroke | Inverse variance weighted | 2 | 0.8963 | 0.6992 | 1.1490 | 0.3877 | NA      | NA     | NA     | 0.0589 | 0.8083 | 27.2532  |
| genus. unknowngenus. id. 1000001215 | IschemicStroke      | Inverse variance weighted | 2 | 0.9840 | 0.8849 | 1.0943 | 0.7667 | NA      | NA     | NA     | 0.1353 | 0.7130 | 207.9751 |
| genus. unknowngenus. id. 1000001215 | LargeArteryStroke   | Inverse variance weighted | 2 | 0.9338 | 0.5166 | 1.6880 | 0.8207 | NA      | NA     | NA     | 3.2586 | 0.0711 | 7.6561   |
| genus. unknowngenus. id. 1000001215 | SmallVesselStroke   | Inverse variance weighted | 2 | 1.0304 | 0.6871 | 1.5452 | 0.8849 | NA      | NA     | NA     | 1.7340 | 0.1879 | 13.7231  |
| genus. unknowngenus. id. 1000001215 | Stroke              | Inverse variance weighted | 2 | 0.9881 | 0.8960 | 1.0898 | 0.8109 | NA      | NA     | NA     | 0.0024 | 0.9605 | 320.2030 |
| genus. unknowngenus. id. 1000005479 | CardioEmbolicStroke | Inverse variance weighted | 2 | 0.9777 | 0.7060 | 1.3540 | 0.8919 | NA      | NA     | NA     | 0.0013 | 0.9710 | 139.1586 |
| genus. unknowngenus. id. 1000005479 | IschemicStroke      | Inverse variance weighted | 2 | 1.0358 | 0.8945 | 1.1993 | 0.6385 | NA      | NA     | NA     | 0.9298 | 0.3349 | 34.6132  |
| genus. unknowngenus. id. 1000005479 | LargeArteryStroke   | Inverse variance weighted | 2 | 1.0180 | 0.6562 | 1.5793 | 0.9366 | NA      | NA     | NA     | 0.3918 | 0.5314 | 19.8075  |
| genus. unknowngenus. id. 1000005479 | SmallVesselStroke   | Inverse variance weighted | 2 | 0.9113 | 0.6085 | 1.3646 | 0.6519 | NA      | NA     | NA     | 0.2881 | 0.5914 | 29.4101  |
| genus. unknowngenus. id. 1000005479 | Stroke              | Inverse variance weighted | 2 | 1.0213 | 0.8926 | 1.1686 | 0.7593 | NA      | NA     | NA     | 0.0557 | 0.8134 | 112.8845 |
| genus. unknowngenus. id. 1000006162 | CardioEmbolicStroke | MR Egger                  | 5 | 0.7764 | 0.3933 | 1.5325 | 0.5185 | 0.0372  | 0.0433 | 0.4534 | 1.3142 | 0.8590 | 80.9389  |
| genus. unknowngenus. id. 1000006162 | CardioEmbolicStroke | Weighted median           | 5 | 1.0179 | 0.8257 | 1.2549 | 0.8679 | 0.0372  | 0.0433 | 0.4534 | 1.3142 | 0.8590 | 80.9389  |
| genus. unknowngenus. id. 1000006162 | CardioEmbolicStroke | Inverse variance weighted | 5 | 1.0365 | 0.8771 | 1.2249 | 0.6738 | 0.0372  | 0.0433 | 0.4534 | 1.3142 | 0.8590 | 80.9389  |
| genus. unknowngenus. id. 1000006162 | CardioEmbolicStroke | Simple mode               | 5 | 0.9854 | 0.7508 | 1.2934 | 0.9208 | 0.0372  | 0.0433 | 0.4534 | 1.3142 | 0.8590 | 80.9389  |
| genus. unknowngenus. id. 1000006162 | CardioEmbolicStroke | Weighted mode             | 5 | 0.9867 | 0.7527 | 1.2935 | 0.9274 | 0.0372  | 0.0433 | 0.4534 | 1.3142 | 0.8590 | 80.9389  |
| genus. unknowngenus. id. 1000006162 | IschemicStroke      | MR Egger                  | 5 | 1.0032 | 0.7533 | 1.3360 | 0.9839 | 0.0032  | 0.0187 | 0.8741 | 1.2508 | 0.7408 | 169.2646 |
| genus. unknowngenus. id. 1000006162 | IschemicStroke      | Weighted median           | 5 | 1.0124 | 0.9288 | 1.1034 | 0.7795 | 0.0032  | 0.0187 | 0.8741 | 1.2508 | 0.7408 | 169.2646 |
| genus. unknowngenus. id. 1000006162 | IschemicStroke      | Inverse variance weighted | 5 | 1.0280 | 0.9574 | 1.1038 | 0.4472 | 0.0032  | 0.0187 | 0.8741 | 1.2508 | 0.7408 | 169.2646 |
| genus. unknowngenus. id. 1000006162 | IschemicStroke      | Simple mode               | 5 | 1.0034 | 0.8965 | 1.1231 | 0.9557 | 0.0032  | 0.0187 | 0.8741 | 1.2508 | 0.7408 | 169.2646 |
| genus. unknowngenus. id. 1000006162 | IschemicStroke      | Weighted mode             | 5 | 1.0045 | 0.8890 | 1.1351 | 0.9457 | 0.0032  | 0.0187 | 0.8741 | 1.2508 | 0.7408 | 169.2646 |
| genus. unknowngenus. id. 1000006162 | LargeArteryStroke   | MR Egger                  | 5 | 0.6240 | 0.2401 | 1.6215 | 0.4045 | 0.0661  | 0.0598 | 0.3499 | 1.5151 | 0.8240 | 39.4107  |

|                                     |                     |                           |   |        |        |         |        |         |        |        |        |        |          |
|-------------------------------------|---------------------|---------------------------|---|--------|--------|---------|--------|---------|--------|--------|--------|--------|----------|
| genus. unknowngenus. id. 1000006162 | LargeArteryStroke   | Weighted median           | 5 | 1.0438 | 0.7877 | 1.3833  | 0.7652 | 0.0661  | 0.0598 | 0.3499 | 1.5151 | 0.8240 | 39.4107  |
| genus. unknowngenus. id. 1000006162 | LargeArteryStroke   | Inverse variance weighted | 5 | 1.0520 | 0.8352 | 1.3251  | 0.6667 | 0.0661  | 0.0598 | 0.3499 | 1.5151 | 0.8240 | 39.4107  |
| genus. unknowngenus. id. 1000006162 | LargeArteryStroke   | Simple mode               | 5 | 1.0245 | 0.6900 | 1.5211  | 0.9104 | 0.0661  | 0.0598 | 0.3499 | 1.5151 | 0.8240 | 39.4107  |
| genus. unknowngenus. id. 1000006162 | LargeArteryStroke   | Weighted mode             | 5 | 1.0245 | 0.7117 | 1.4746  | 0.9028 | 0.0661  | 0.0598 | 0.3499 | 1.5151 | 0.8240 | 39.4107  |
| genus. unknowngenus. id. 1000006162 | SmallVesselStroke   | MR Egger                  | 5 | 1.1650 | 0.4884 | 2.7790  | 0.7533 | 0.0170  | 0.0559 | 0.7804 | 2.7377 | 0.4339 | 13.8224  |
| genus. unknowngenus. id. 1000006162 | SmallVesselStroke   | Weighted median           | 5 | 1.2241 | 0.9142 | 1.6392  | 0.1745 | 0.0170  | 0.0559 | 0.7804 | 2.7377 | 0.4339 | 13.8224  |
| genus. unknowngenus. id. 1000006162 | SmallVesselStroke   | Inverse variance weighted | 5 | 1.3282 | 1.0734 | 1.6434  | 0.0090 | 0.0170  | 0.0559 | 0.7804 | 2.7377 | 0.4339 | 13.8224  |
| genus. unknowngenus. id. 1000006162 | SmallVesselStroke   | Simple mode               | 5 | 1.1550 | 0.7984 | 1.6707  | 0.4870 | 0.0170  | 0.0559 | 0.7804 | 2.7377 | 0.4339 | 13.8224  |
| genus. unknowngenus. id. 1000006162 | SmallVesselStroke   | Weighted mode             | 5 | 1.1550 | 0.7813 | 1.7073  | 0.5100 | 0.0170  | 0.0559 | 0.7804 | 2.7377 | 0.4339 | 13.8224  |
| genus. unknowngenus. id. 1000006162 | Stroke              | MR Egger                  | 5 | 1.0337 | 0.7950 | 1.3440  | 0.8205 | 0.0001  | 0.0171 | 0.9972 | 2.5476 | 0.4667 | 107.5650 |
| genus. unknowngenus. id. 1000006162 | Stroke              | Weighted median           | 5 | 1.0710 | 0.9814 | 1.1688  | 0.1240 | 0.0001  | 0.0171 | 0.9972 | 2.5476 | 0.4667 | 107.5650 |
| genus. unknowngenus. id. 1000006162 | Stroke              | Inverse variance weighted | 5 | 1.0342 | 0.9689 | 1.1040  | 0.3123 | 0.0001  | 0.0171 | 0.9972 | 2.5476 | 0.4667 | 107.5650 |
| genus. unknowngenus. id. 1000006162 | Stroke              | Simple mode               | 5 | 1.0788 | 0.9591 | 1.2135  | 0.2750 | 0.0001  | 0.0171 | 0.9972 | 2.5476 | 0.4667 | 107.5650 |
| genus. unknowngenus. id. 1000006162 | Stroke              | Weighted mode             | 5 | 1.0788 | 0.9587 | 1.2139  | 0.2763 | 0.0001  | 0.0171 | 0.9972 | 2.5476 | 0.4667 | 107.5650 |
| genus. unknowngenus. id. 1868       | CardioEmbolicStroke | Inverse variance weighted | 2 | 1.2346 | 0.8794 | 1.7333  | 0.2233 | NA      | NA     | NA     | 0.2814 | 0.5958 | 19.9074  |
| genus. unknowngenus. id. 1868       | IschemicStroke      | Inverse variance weighted | 2 | 1.1175 | 0.9675 | 1.2909  | 0.1310 | NA      | NA     | NA     | 0.3857 | 0.5346 | 22.9757  |
| genus. unknowngenus. id. 1868       | LargeArteryStroke   | Inverse variance weighted | 2 | 0.7836 | 0.4940 | 1.2430  | 0.3002 | NA      | NA     | NA     | 0.0137 | 0.9070 | 13.1349  |
| genus. unknowngenus. id. 1868       | SmallVesselStroke   | Inverse variance weighted | 2 | 1.6583 | 1.0784 | 2.5498  | 0.0212 | NA      | NA     | NA     | 0.2484 | 0.6182 | 2.9232   |
| genus. unknowngenus. id. 1868       | Stroke              | Inverse variance weighted | 2 | 1.1694 | 1.0241 | 1.3354  | 0.0208 | NA      | NA     | NA     | 0.2808 | 0.5962 | 17.3304  |
| genus. unknowngenus. id. 2001       | CardioEmbolicStroke | MR Egger                  | 4 | 1.6450 | 0.4562 | 5.9311  | 0.5263 | -0.0440 | 0.0539 | 0.4995 | 1.1827 | 0.7571 | 18.1984  |
| genus. unknowngenus. id. 2001       | CardioEmbolicStroke | Weighted median           | 4 | 0.9364 | 0.6801 | 1.2893  | 0.6872 | -0.0440 | 0.0539 | 0.4995 | 1.1827 | 0.7571 | 18.1984  |
| genus. unknowngenus. id. 2001       | CardioEmbolicStroke | Inverse variance weighted | 4 | 0.9744 | 0.7494 | 1.2670  | 0.8463 | -0.0440 | 0.0539 | 0.4995 | 1.1827 | 0.7571 | 18.1984  |
| genus. unknowngenus. id. 2001       | CardioEmbolicStroke | Simple mode               | 4 | 0.8763 | 0.5819 | 1.3196  | 0.5722 | -0.0440 | 0.0539 | 0.4995 | 1.1827 | 0.7571 | 18.1984  |
| genus. unknowngenus. id. 2001       | CardioEmbolicStroke | Weighted mode             | 4 | 0.9036 | 0.5939 | 1.3748  | 0.6681 | -0.0440 | 0.0539 | 0.4995 | 1.1827 | 0.7571 | 18.1984  |
| genus. unknowngenus. id. 2001       | IschemicStroke      | MR Egger                  | 4 | 0.7252 | 0.4197 | 1.2531  | 0.3686 | 0.0221  | 0.0224 | 0.4274 | 1.9816 | 0.5762 | 39.8391  |
| genus. unknowngenus. id. 2001       | IschemicStroke      | Weighted median           | 4 | 0.9433 | 0.8239 | 1.0800  | 0.3981 | 0.0221  | 0.0224 | 0.4274 | 1.9816 | 0.5762 | 39.8391  |
| genus. unknowngenus. id. 2001       | IschemicStroke      | Inverse variance weighted | 4 | 0.9496 | 0.8482 | 1.0632  | 0.3700 | 0.0221  | 0.0224 | 0.4274 | 1.9816 | 0.5762 | 39.8391  |
| genus. unknowngenus. id. 2001       | IschemicStroke      | Simple mode               | 4 | 0.9331 | 0.7731 | 1.1263  | 0.5230 | 0.0221  | 0.0224 | 0.4274 | 1.9816 | 0.5762 | 39.8391  |
| genus. unknowngenus. id. 2001       | IschemicStroke      | Weighted mode             | 4 | 0.9331 | 0.7702 | 1.1306  | 0.5308 | 0.0221  | 0.0224 | 0.4274 | 1.9816 | 0.5762 | 39.8391  |
| genus. unknowngenus. id. 2001       | LargeArteryStroke   | MR Egger                  | 3 | 0.7362 | 0.0921 | 5.8820  | 0.8210 | 0.0151  | 0.0915 | 0.8957 | 0.7591 | 0.3836 | 15.8735  |
| genus. unknowngenus. id. 2001       | LargeArteryStroke   | Weighted median           | 3 | 0.9596 | 0.6066 | 1.5181  | 0.8603 | 0.0151  | 0.0915 | 0.8957 | 0.7591 | 0.3836 | 15.8735  |
| genus. unknowngenus. id. 2001       | LargeArteryStroke   | Inverse variance weighted | 3 | 0.8747 | 0.6024 | 1.2700  | 0.4816 | 0.0151  | 0.0915 | 0.8957 | 0.7591 | 0.3836 | 15.8735  |
| genus. unknowngenus. id. 2001       | LargeArteryStroke   | Simple mode               | 3 | 0.9914 | 0.5660 | 1.7363  | 0.9786 | 0.0151  | 0.0915 | 0.8957 | 0.7591 | 0.3836 | 15.8735  |
| genus. unknowngenus. id. 2001       | LargeArteryStroke   | Weighted mode             | 3 | 0.9975 | 0.5741 | 1.7333  | 0.9938 | 0.0151  | 0.0915 | 0.8957 | 0.7591 | 0.3836 | 15.8735  |
| genus. unknowngenus. id. 2001       | SmallVesselStroke   | MR Egger                  | 3 | 0.6656 | 0.0967 | 4.5826  | 0.7504 | 0.0364  | 0.0852 | 0.7428 | 0.0177 | 0.8941 | 45.4887  |
| genus. unknowngenus. id. 2001       | SmallVesselStroke   | Weighted median           | 3 | 0.9900 | 0.6446 | 1.5205  | 0.9633 | 0.0364  | 0.0852 | 0.7428 | 0.0177 | 0.8941 | 45.4887  |
| genus. unknowngenus. id. 2001       | SmallVesselStroke   | Inverse variance weighted | 3 | 1.0068 | 0.7102 | 1.4271  | 0.9698 | 0.0364  | 0.0852 | 0.7428 | 0.0177 | 0.8941 | 45.4887  |
| genus. unknowngenus. id. 2001       | SmallVesselStroke   | Simple mode               | 3 | 0.9509 | 0.6033 | 1.4987  | 0.8484 | 0.0364  | 0.0852 | 0.7428 | 0.0177 | 0.8941 | 45.4887  |
| genus. unknowngenus. id. 2001       | SmallVesselStroke   | Weighted mode             | 3 | 0.9572 | 0.5986 | 1.5307  | 0.8719 | 0.0364  | 0.0852 | 0.7428 | 0.0177 | 0.8941 | 45.4887  |
| genus. unknowngenus. id. 2001       | Stroke              | MR Egger                  | 4 | 0.7507 | 0.4536 | 1.2422  | 0.3805 | 0.0172  | 0.0206 | 0.4922 | 1.3851 | 0.5003 | 35.5071  |
| genus. unknowngenus. id. 2001       | Stroke              | Weighted median           | 4 | 0.9287 | 0.8165 | 1.0562  | 0.2596 | 0.0172  | 0.0206 | 0.4922 | 1.3851 | 0.5003 | 35.5071  |
| genus. unknowngenus. id. 2001       | Stroke              | Inverse variance weighted | 4 | 0.9257 | 0.8342 | 1.0272  | 0.1456 | 0.0172  | 0.0206 | 0.4922 | 1.3851 | 0.5003 | 35.5071  |
| genus. unknowngenus. id. 2001       | Stroke              | Simple mode               | 4 | 0.9226 | 0.7656 | 1.1119  | 0.4597 | 0.0172  | 0.0206 | 0.4922 | 1.3851 | 0.5003 | 35.5071  |
| genus. unknowngenus. id. 2001       | Stroke              | Weighted mode             | 4 | 0.9199 | 0.7828 | 1.0809  | 0.3850 | 0.0172  | 0.0206 | 0.4922 | 1.3851 | 0.5003 | 35.5071  |
| genus. unknowngenus. id. 2041       | CardioEmbolicStroke | MR Egger                  | 3 | 2.4684 | 0.1559 | 39.0817 | 0.6370 | -0.0587 | 0.1157 | 0.7010 | 0.2425 | 0.6224 | 11.9751  |
| genus. unknowngenus. id. 2041       | CardioEmbolicStroke | Weighted median           | 3 | 1.2162 | 0.8698 | 1.7004  | 0.2525 | -0.0587 | 0.1157 | 0.7010 | 0.2425 | 0.6224 | 11.9751  |
| genus. unknowngenus. id. 2041       | CardioEmbolicStroke | Inverse variance weighted | 3 | 1.2113 | 0.9251 | 1.5859  | 0.1633 | -0.0587 | 0.1157 | 0.7010 | 0.2425 | 0.6224 | 11.9751  |
| genus. unknowngenus. id. 2041       | CardioEmbolicStroke | Simple mode               | 3 | 1.2381 | 0.8525 | 1.7981  | 0.3785 | -0.0587 | 0.1157 | 0.7010 | 0.2425 | 0.6224 | 11.9751  |
| genus. unknowngenus. id. 2041       | CardioEmbolicStroke | Weighted mode             | 3 | 1.2344 | 0.8525 | 1.7873  | 0.3809 | -0.0587 | 0.1157 | 0.7010 | 0.2425 | 0.6224 | 11.9751  |
| genus. unknowngenus. id. 2041       | IschemicStroke      | MR Egger                  | 3 | 2.4494 | 0.2747 | 21.8390 | 0.5695 | -0.0737 | 0.0915 | 0.5687 | 5.4827 | 0.0645 | 21.1971  |
| genus. unknowngenus. id. 2041       | IschemicStroke      | Weighted median           | 3 | 0.9861 | 0.8237 | 1.1805  | 0.8786 | -0.0737 | 0.0915 | 0.5687 | 5.4827 | 0.0645 | 21.1971  |
| genus. unknowngenus. id. 2041       | IschemicStroke      | Inverse variance weighted | 3 | 1.0021 | 0.8234 | 1.2196  | 0.9832 | -0.0737 | 0.0915 | 0.5687 | 5.4827 | 0.0645 | 21.1971  |
| genus. unknowngenus. id. 2041       | IschemicStroke      | Simple mode               | 3 | 0.9554 | 0.7518 | 1.2140  | 0.7447 | -0.0737 | 0.0915 | 0.5687 | 5.4827 | 0.0645 | 21.1971  |
| genus. unknowngenus. id. 2041       | IschemicStroke      | Weighted mode             | 3 | 0.9660 | 0.7728 | 1.2075  | 0.7901 | -0.0737 | 0.0915 | 0.5687 | 5.4827 | 0.0645 | 21.1971  |

|                               |                     |                           |   |        |        |           |        |         |        |        |        |        |         |
|-------------------------------|---------------------|---------------------------|---|--------|--------|-----------|--------|---------|--------|--------|--------|--------|---------|
| genus. unknowngenus. id. 2041 | LargeArteryStroke   | MR Egger                  | 3 | 4.2647 | 0.0156 | 1165.7907 | 0.7015 | -0.1121 | 0.2340 | 0.7156 | 2.3691 | 0.1238 | 7.1839  |
| genus. unknowngenus. id. 2041 | LargeArteryStroke   | Weighted median           | 3 | 0.9395 | 0.5723 | 1.5425    | 0.8053 | -0.1121 | 0.2340 | 0.7156 | 2.3691 | 0.1238 | 7.1839  |
| genus. unknowngenus. id. 2041 | LargeArteryStroke   | Inverse variance weighted | 3 | 1.0896 | 0.7086 | 1.6755    | 0.6958 | -0.1121 | 0.2340 | 0.7156 | 2.3691 | 0.1238 | 7.1839  |
| genus. unknowngenus. id. 2041 | LargeArteryStroke   | Simple mode               | 3 | 0.8749 | 0.4814 | 1.5899    | 0.7038 | -0.1121 | 0.2340 | 0.7156 | 2.3691 | 0.1238 | 7.1839  |
| genus. unknowngenus. id. 2041 | LargeArteryStroke   | Weighted mode             | 3 | 0.8778 | 0.4811 | 1.6016    | 0.7123 | -0.1121 | 0.2340 | 0.7156 | 2.3691 | 0.1238 | 7.1839  |
| genus. unknowngenus. id. 2041 | SmallVesselStroke   | MR Egger                  | 3 | 0.5594 | 0.0196 | 15.9381   | 0.7914 | 0.0356  | 0.1398 | 0.8412 | 0.0892 | 0.7652 | 16.9023 |
| genus. unknowngenus. id. 2041 | SmallVesselStroke   | Weighted median           | 3 | 0.8980 | 0.6123 | 1.3168    | 0.5816 | 0.0356  | 0.1398 | 0.8412 | 0.0892 | 0.7652 | 16.9023 |
| genus. unknowngenus. id. 2041 | SmallVesselStroke   | Inverse variance weighted | 3 | 0.8629 | 0.6211 | 1.1987    | 0.3792 | 0.0356  | 0.1398 | 0.8412 | 0.0892 | 0.7652 | 16.9023 |
| genus. unknowngenus. id. 2041 | SmallVesselStroke   | Simple mode               | 3 | 0.9050 | 0.5940 | 1.3787    | 0.6877 | 0.0356  | 0.1398 | 0.8412 | 0.0892 | 0.7652 | 16.9023 |
| genus. unknowngenus. id. 2041 | SmallVesselStroke   | Weighted mode             | 3 | 0.9050 | 0.5760 | 1.4218    | 0.7071 | 0.0356  | 0.1398 | 0.8412 | 0.0892 | 0.7652 | 16.9023 |
| genus. unknowngenus. id. 2041 | Stroke              | MR Egger                  | 3 | 1.5085 | 0.1262 | 18.0367   | 0.8001 | -0.0333 | 0.1040 | 0.8027 | 4.9514 | 0.0261 | 22.2425 |
| genus. unknowngenus. id. 2041 | Stroke              | Weighted median           | 3 | 0.9357 | 0.8026 | 1.0908    | 0.3955 | -0.0333 | 0.1040 | 0.8027 | 4.9514 | 0.0261 | 22.2425 |
| genus. unknowngenus. id. 2041 | Stroke              | Inverse variance weighted | 3 | 1.0078 | 0.8404 | 1.2085    | 0.9335 | -0.0333 | 0.1040 | 0.8027 | 4.9514 | 0.0261 | 22.2425 |
| genus. unknowngenus. id. 2041 | Stroke              | Simple mode               | 3 | 0.9207 | 0.7633 | 1.1105    | 0.4786 | -0.0333 | 0.1040 | 0.8027 | 4.9514 | 0.0261 | 22.2425 |
| genus. unknowngenus. id. 2041 | Stroke              | Weighted mode             | 3 | 0.9235 | 0.7772 | 1.0974    | 0.4615 | -0.0333 | 0.1040 | 0.8027 | 4.9514 | 0.0261 | 22.2425 |
| genus. unknowngenus. id. 2071 | CardioEmbolicStroke | MR Egger                  | 6 | 0.6366 | 0.1445 | 2.8049    | 0.5827 | 0.0221  | 0.0636 | 0.7459 | 2.3777 | 0.6667 | 12.3690 |
| genus. unknowngenus. id. 2071 | CardioEmbolicStroke | Weighted median           | 6 | 0.8038 | 0.6044 | 1.0689    | 0.1332 | 0.0221  | 0.0636 | 0.7459 | 2.3777 | 0.6667 | 12.3690 |
| genus. unknowngenus. id. 2071 | CardioEmbolicStroke | Inverse variance weighted | 6 | 0.8254 | 0.6614 | 1.0302    | 0.0897 | 0.0221  | 0.0636 | 0.7459 | 2.3777 | 0.6667 | 12.3690 |
| genus. unknowngenus. id. 2071 | CardioEmbolicStroke | Simple mode               | 6 | 0.7728 | 0.5086 | 1.1743    | 0.2814 | 0.0221  | 0.0636 | 0.7459 | 2.3777 | 0.6667 | 12.3690 |
| genus. unknowngenus. id. 2071 | CardioEmbolicStroke | Weighted mode             | 6 | 0.7676 | 0.4984 | 1.1824    | 0.2839 | 0.0221  | 0.0636 | 0.7459 | 2.3777 | 0.6667 | 12.3690 |
| genus. unknowngenus. id. 2071 | IschemicStroke      | MR Egger                  | 6 | 1.0327 | 0.3829 | 2.7852    | 0.9524 | -0.0092 | 0.0428 | 0.8407 | 9.8695 | 0.0427 | 22.6429 |
| genus. unknowngenus. id. 2071 | IschemicStroke      | Weighted median           | 6 | 0.8939 | 0.7805 | 1.0238    | 0.1052 | -0.0092 | 0.0428 | 0.8407 | 9.8695 | 0.0427 | 22.6429 |
| genus. unknowngenus. id. 2071 | IschemicStroke      | Inverse variance weighted | 6 | 0.9276 | 0.8109 | 1.0612    | 0.2738 | -0.0092 | 0.0428 | 0.8407 | 9.8695 | 0.0427 | 22.6429 |
| genus. unknowngenus. id. 2071 | IschemicStroke      | Simple mode               | 6 | 0.8760 | 0.6827 | 1.1240    | 0.3455 | -0.0092 | 0.0428 | 0.8407 | 9.8695 | 0.0427 | 22.6429 |
| genus. unknowngenus. id. 2071 | IschemicStroke      | Weighted mode             | 6 | 0.8760 | 0.7033 | 1.0910    | 0.2902 | -0.0092 | 0.0428 | 0.8407 | 9.8695 | 0.0427 | 22.6429 |
| genus. unknowngenus. id. 2071 | LargeArteryStroke   | MR Egger                  | 6 | 2.5503 | 0.3206 | 20.2870   | 0.4262 | -0.1192 | 0.0889 | 0.2507 | 6.4187 | 0.2676 | 3.9400  |
| genus. unknowngenus. id. 2071 | LargeArteryStroke   | Weighted median           | 6 | 0.6918 | 0.4646 | 1.0299    | 0.0695 | -0.1192 | 0.0889 | 0.2507 | 6.4187 | 0.2676 | 3.9400  |
| genus. unknowngenus. id. 2071 | LargeArteryStroke   | Inverse variance weighted | 6 | 0.6264 | 0.4489 | 0.8741    | 0.0059 | -0.1192 | 0.0889 | 0.2507 | 6.4187 | 0.2676 | 3.9400  |
| genus. unknowngenus. id. 2071 | LargeArteryStroke   | Simple mode               | 6 | 0.7491 | 0.4069 | 1.3792    | 0.3962 | -0.1192 | 0.0889 | 0.2507 | 6.4187 | 0.2676 | 3.9400  |
| genus. unknowngenus. id. 2071 | LargeArteryStroke   | Weighted mode             | 6 | 0.7613 | 0.4236 | 1.3682    | 0.4037 | -0.1192 | 0.0889 | 0.2507 | 6.4187 | 0.2676 | 3.9400  |
| genus. unknowngenus. id. 2071 | SmallVesselStroke   | MR Egger                  | 6 | 0.6906 | 0.1110 | 4.2951    | 0.7116 | 0.0124  | 0.0783 | 0.8817 | 0.5715 | 0.9662 | 11.9036 |
| genus. unknowngenus. id. 2071 | SmallVesselStroke   | Weighted median           | 6 | 0.8301 | 0.5958 | 1.1565    | 0.2710 | 0.0124  | 0.0783 | 0.8817 | 0.5715 | 0.9662 | 11.9036 |
| genus. unknowngenus. id. 2071 | SmallVesselStroke   | Inverse variance weighted | 6 | 0.7993 | 0.6074 | 1.0520    | 0.1099 | 0.0124  | 0.0783 | 0.8817 | 0.5715 | 0.9662 | 11.9036 |
| genus. unknowngenus. id. 2071 | SmallVesselStroke   | Simple mode               | 6 | 0.8512 | 0.5460 | 1.3270    | 0.5088 | 0.0124  | 0.0783 | 0.8817 | 0.5715 | 0.9662 | 11.9036 |
| genus. unknowngenus. id. 2071 | SmallVesselStroke   | Weighted mode             | 6 | 0.8534 | 0.5478 | 1.3295    | 0.5146 | 0.0124  | 0.0783 | 0.8817 | 0.5715 | 0.9662 | 11.9036 |
| genus. unknowngenus. id. 2071 | Stroke              | MR Egger                  | 6 | 1.0693 | 0.4594 | 2.4889    | 0.8839 | -0.0108 | 0.0364 | 0.7819 | 8.2127 | 0.0841 | 26.0488 |
| genus. unknowngenus. id. 2071 | Stroke              | Weighted median           | 6 | 0.9067 | 0.7993 | 1.0285    | 0.1279 | -0.0108 | 0.0364 | 0.7819 | 8.2127 | 0.0841 | 26.0488 |
| genus. unknowngenus. id. 2071 | Stroke              | Inverse variance weighted | 6 | 0.9426 | 0.8402 | 1.0574    | 0.3134 | -0.0108 | 0.0364 | 0.7819 | 8.2127 | 0.0841 | 26.0488 |
| genus. unknowngenus. id. 2071 | Stroke              | Simple mode               | 6 | 0.8826 | 0.7204 | 1.0815    | 0.2824 | -0.0108 | 0.0364 | 0.7819 | 8.2127 | 0.0841 | 26.0488 |
| genus. unknowngenus. id. 2071 | Stroke              | Weighted mode             | 6 | 0.8940 | 0.7267 | 1.0998    | 0.3376 | -0.0108 | 0.0364 | 0.7819 | 8.2127 | 0.0841 | 26.0488 |
| genus. unknowngenus. id. 2755 | CardioEmbolicStroke | MR Egger                  | 5 | 0.4377 | 0.0590 | 3.2460    | 0.4781 | 0.0610  | 0.0833 | 0.5169 | 4.2525 | 0.2355 | 11.2812 |
| genus. unknowngenus. id. 2755 | CardioEmbolicStroke | Weighted median           | 5 | 0.9058 | 0.6807 | 1.2053    | 0.4973 | 0.0610  | 0.0833 | 0.5169 | 4.2525 | 0.2355 | 11.2812 |
| genus. unknowngenus. id. 2755 | CardioEmbolicStroke | Inverse variance weighted | 5 | 0.9201 | 0.7288 | 1.1616    | 0.4839 | 0.0610  | 0.0833 | 0.5169 | 4.2525 | 0.2355 | 11.2812 |
| genus. unknowngenus. id. 2755 | CardioEmbolicStroke | Simple mode               | 5 | 1.0114 | 0.6788 | 1.5069    | 0.9583 | 0.0610  | 0.0833 | 0.5169 | 4.2525 | 0.2355 | 11.2812 |
| genus. unknowngenus. id. 2755 | CardioEmbolicStroke | Weighted mode             | 5 | 0.9683 | 0.6599 | 1.4207    | 0.8771 | 0.0610  | 0.0833 | 0.5169 | 4.2525 | 0.2355 | 11.2812 |
| genus. unknowngenus. id. 2755 | IschemicStroke      | MR Egger                  | 5 | 0.8523 | 0.4123 | 1.7620    | 0.6954 | 0.0108  | 0.0302 | 0.7456 | 1.8686 | 0.6001 | 44.7770 |
| genus. unknowngenus. id. 2755 | IschemicStroke      | Weighted median           | 5 | 0.9870 | 0.8786 | 1.1087    | 0.8249 | 0.0108  | 0.0302 | 0.7456 | 1.8686 | 0.6001 | 44.7770 |
| genus. unknowngenus. id. 2755 | IschemicStroke      | Inverse variance weighted | 5 | 0.9714 | 0.8879 | 1.0628    | 0.5272 | 0.0108  | 0.0302 | 0.7456 | 1.8686 | 0.6001 | 44.7770 |
| genus. unknowngenus. id. 2755 | IschemicStroke      | Simple mode               | 5 | 0.9889 | 0.8624 | 1.1340    | 0.8808 | 0.0108  | 0.0302 | 0.7456 | 1.8686 | 0.6001 | 44.7770 |
| genus. unknowngenus. id. 2755 | IschemicStroke      | Weighted mode             | 5 | 0.9889 | 0.8712 | 1.1226    | 0.8714 | 0.0108  | 0.0302 | 0.7456 | 1.8686 | 0.6001 | 44.7770 |
| genus. unknowngenus. id. 2755 | LargeArteryStroke   | MR Egger                  | 5 | 0.5142 | 0.0443 | 5.9633    | 0.6316 | 0.0460  | 0.1014 | 0.6807 | 3.4988 | 0.3209 | 6.0843  |
| genus. unknowngenus. id. 2755 | LargeArteryStroke   | Weighted median           | 5 | 1.0110 | 0.7170 | 1.4256    | 0.9501 | 0.0460  | 0.1014 | 0.6807 | 3.4988 | 0.3209 | 6.0843  |
| genus. unknowngenus. id. 2755 | LargeArteryStroke   | Inverse variance weighted | 5 | 0.9030 | 0.6808 | 1.1978    | 0.4790 | 0.0460  | 0.1014 | 0.6807 | 3.4988 | 0.3209 | 6.0843  |
| genus. unknowngenus. id. 2755 | LargeArteryStroke   | Simple mode               | 5 | 1.0288 | 0.6734 | 1.5718    | 0.9018 | 0.0460  | 0.1014 | 0.6807 | 3.4988 | 0.3209 | 6.0843  |

|                                   |                     |                           |   |        |        |         |        |         |        |        |        |        |         |
|-----------------------------------|---------------------|---------------------------|---|--------|--------|---------|--------|---------|--------|--------|--------|--------|---------|
| genus. unknowngenus. id. 2755     | LargeArteryStroke   | Weighted mode             | 5 | 1.0288 | 0.6859 | 1.5433  | 0.8974 | 0.0460  | 0.1014 | 0.6807 | 3.4988 | 0.3209 | 6.0843  |
| genus. unknowngenus. id. 2755     | SmallVesselStroke   | MR Egger                  | 5 | 2.6518 | 0.2209 | 31.8302 | 0.4978 | -0.0805 | 0.1033 | 0.4929 | 4.2830 | 0.2325 | 7.9350  |
| genus. unknowngenus. id. 2755     | SmallVesselStroke   | Weighted median           | 5 | 0.8921 | 0.6257 | 1.2719  | 0.5281 | -0.0805 | 0.1033 | 0.4929 | 4.2830 | 0.2325 | 7.9350  |
| genus. unknowngenus. id. 2755     | SmallVesselStroke   | Inverse variance weighted | 5 | 0.9954 | 0.7423 | 1.3348  | 0.9755 | -0.0805 | 0.1033 | 0.4929 | 4.2830 | 0.2325 | 7.9350  |
| genus. unknowngenus. id. 2755     | SmallVesselStroke   | Simple mode               | 5 | 0.8477 | 0.4922 | 1.4599  | 0.5834 | -0.0805 | 0.1033 | 0.4929 | 4.2830 | 0.2325 | 7.9350  |
| genus. unknowngenus. id. 2755     | SmallVesselStroke   | Weighted mode             | 5 | 0.8441 | 0.5052 | 1.4103  | 0.5528 | -0.0805 | 0.1033 | 0.4929 | 4.2830 | 0.2325 | 7.9350  |
| genus. unknowngenus. id. 2755     | Stroke              | MR Egger                  | 5 | 0.8483 | 0.4341 | 1.6578  | 0.6633 | 0.0111  | 0.0279 | 0.7173 | 2.7424 | 0.4331 | 41.2118 |
| genus. unknowngenus. id. 2755     | Stroke              | Weighted median           | 5 | 1.0082 | 0.9081 | 1.1193  | 0.8783 | 0.0111  | 0.0279 | 0.7173 | 2.7424 | 0.4331 | 41.2118 |
| genus. unknowngenus. id. 2755     | Stroke              | Inverse variance weighted | 5 | 0.9709 | 0.8935 | 1.0551  | 0.4869 | 0.0111  | 0.0279 | 0.7173 | 2.7424 | 0.4331 | 41.2118 |
| genus. unknowngenus. id. 2755     | Stroke              | Simple mode               | 5 | 1.0189 | 0.8889 | 1.1678  | 0.8018 | 0.0111  | 0.0279 | 0.7173 | 2.7424 | 0.4331 | 41.2118 |
| genus. unknowngenus. id. 2755     | Stroke              | Weighted mode             | 5 | 1.0189 | 0.8962 | 1.1583  | 0.7896 | 0.0111  | 0.0279 | 0.7173 | 2.7424 | 0.4331 | 41.2118 |
| genus. unknowngenus. id. 826      | CardioEmbolicStroke | Inverse variance weighted | 2 | 1.1998 | 0.7968 | 1.8067  | 0.3830 | NA      | NA     | NA     | 0.0008 | 0.9771 | 14.4539 |
| genus. unknowngenus. id. 826      | IschemicStroke      | Inverse variance weighted | 2 | 0.8669 | 0.7232 | 1.0392  | 0.1225 | NA      | NA     | NA     | 0.0525 | 0.8188 | 19.8470 |
| genus. unknowngenus. id. 826      | LargeArteryStroke   | Inverse variance weighted | 2 | 1.3243 | 0.7594 | 2.3096  | 0.3222 | NA      | NA     | NA     | 0.0002 | 0.9885 | 8.2912  |
| genus. unknowngenus. id. 826      | SmallVesselStroke   | Inverse variance weighted | 2 | 0.8605 | 0.5153 | 1.4369  | 0.5657 | NA      | NA     | NA     | 0.0756 | 0.7833 | 15.1350 |
| genus. unknowngenus. id. 826      | Stroke              | Inverse variance weighted | 2 | 0.8759 | 0.7413 | 1.0350  | 0.1196 | NA      | NA     | NA     | 0.1026 | 0.7487 | 21.6524 |
| genus. unknowngenus. id. 959      | CardioEmbolicStroke | Inverse variance weighted | 2 | 1.2483 | 0.9802 | 1.5897  | 0.0723 | NA      | NA     | NA     | 0.0654 | 0.7981 | 12.5283 |
| genus. unknowngenus. id. 959      | IschemicStroke      | Inverse variance weighted | 2 | 1.0710 | 0.9615 | 1.1931  | 0.2127 | NA      | NA     | NA     | 1.0391 | 0.3080 | 35.1587 |
| genus. unknowngenus. id. 959      | LargeArteryStroke   | Inverse variance weighted | 2 | 1.1660 | 0.8465 | 1.6061  | 0.3473 | NA      | NA     | NA     | 0.5121 | 0.4742 | 13.8195 |
| genus. unknowngenus. id. 959      | SmallVesselStroke   | Inverse variance weighted | 2 | 1.1605 | 0.6876 | 1.9588  | 0.5772 | NA      | NA     | NA     | 3.1001 | 0.0783 | 7.4821  |
| genus. unknowngenus. id. 959      | Stroke              | Inverse variance weighted | 2 | 1.0477 | 0.9179 | 1.1959  | 0.4901 | NA      | NA     | NA     | 1.8385 | 0.1751 | 38.2895 |
| order. Bacteroidales. id. 913     | CardioEmbolicStroke | MR Egger                  | 3 | 1.6236 | 0.5736 | 4.5958  | 0.5289 | -0.0358 | 0.0365 | 0.5062 | 1.2936 | 0.5237 | 11.4267 |
| order. Bacteroidales. id. 913     | CardioEmbolicStroke | Weighted median           | 3 | 0.9580 | 0.6000 | 1.5294  | 0.8572 | -0.0358 | 0.0365 | 0.5062 | 1.2936 | 0.5237 | 11.4267 |
| order. Bacteroidales. id. 913     | CardioEmbolicStroke | Inverse variance weighted | 3 | 0.9970 | 0.6926 | 1.4351  | 0.9871 | -0.0358 | 0.0365 | 0.5062 | 1.2936 | 0.5237 | 11.4267 |
| order. Bacteroidales. id. 913     | CardioEmbolicStroke | Simple mode               | 3 | 0.8904 | 0.5007 | 1.5834  | 0.7308 | -0.0358 | 0.0365 | 0.5062 | 1.2936 | 0.5237 | 11.4267 |
| order. Bacteroidales. id. 913     | CardioEmbolicStroke | Weighted mode             | 3 | 0.8904 | 0.4993 | 1.5877  | 0.7319 | -0.0358 | 0.0365 | 0.5062 | 1.2936 | 0.5237 | 11.4267 |
| order. Bacteroidales. id. 913     | IschemicStroke      | MR Egger                  | 3 | 1.3098 | 0.6695 | 2.5626  | 0.5751 | -0.0059 | 0.0240 | 0.8467 | 2.3192 | 0.1278 | 11.2137 |
| order. Bacteroidales. id. 913     | IschemicStroke      | Weighted median           | 3 | 1.2486 | 1.0064 | 1.5491  | 0.0436 | -0.0059 | 0.0240 | 0.8467 | 2.3192 | 0.1278 | 11.2137 |
| order. Bacteroidales. id. 913     | IschemicStroke      | Inverse variance weighted | 3 | 1.2111 | 1.0153 | 1.4446  | 0.0333 | -0.0059 | 0.0240 | 0.8467 | 2.3192 | 0.1278 | 11.2137 |
| order. Bacteroidales. id. 913     | IschemicStroke      | Simple mode               | 3 | 1.3252 | 1.0079 | 1.7423  | 0.1813 | -0.0059 | 0.0240 | 0.8467 | 2.3192 | 0.1278 | 11.2137 |
| order. Bacteroidales. id. 913     | IschemicStroke      | Weighted mode             | 3 | 1.3168 | 0.9945 | 1.7435  | 0.1946 | -0.0059 | 0.0240 | 0.8467 | 2.3192 | 0.1278 | 11.2137 |
| order. Bacteroidales. id. 913     | LargeArteryStroke   | MR Egger                  | 3 | 2.8821 | 0.3788 | 21.9275 | 0.4929 | -0.0759 | 0.0709 | 0.4782 | 4.4724 | 0.1069 | 4.3292  |
| order. Bacteroidales. id. 913     | LargeArteryStroke   | Weighted median           | 3 | 1.3762 | 0.7186 | 2.6356  | 0.3354 | -0.0759 | 0.0709 | 0.4782 | 4.4724 | 0.1069 | 4.3292  |
| order. Bacteroidales. id. 913     | LargeArteryStroke   | Inverse variance weighted | 3 | 1.0195 | 0.4896 | 2.1229  | 0.9588 | -0.0759 | 0.0709 | 0.4782 | 4.4724 | 0.1069 | 4.3292  |
| order. Bacteroidales. id. 913     | LargeArteryStroke   | Simple mode               | 3 | 1.4401 | 0.6728 | 3.0824  | 0.4468 | -0.0759 | 0.0709 | 0.4782 | 4.4724 | 0.1069 | 4.3292  |
| order. Bacteroidales. id. 913     | LargeArteryStroke   | Weighted mode             | 3 | 1.4457 | 0.6914 | 3.0230  | 0.4307 | -0.0759 | 0.0709 | 0.4782 | 4.4724 | 0.1069 | 4.3292  |
| order. Bacteroidales. id. 913     | SmallVesselStroke   | MR Egger                  | 3 | 1.9860 | 0.4305 | 9.1626  | 0.5407 | -0.0484 | 0.0532 | 0.5300 | 1.3205 | 0.2505 | 5.5711  |
| order. Bacteroidales. id. 913     | SmallVesselStroke   | Weighted median           | 3 | 1.1022 | 0.5966 | 2.0364  | 0.7559 | -0.0484 | 0.0532 | 0.5300 | 1.3205 | 0.2505 | 5.5711  |
| order. Bacteroidales. id. 913     | SmallVesselStroke   | Inverse variance weighted | 3 | 1.0199 | 0.6163 | 1.6879  | 0.9389 | -0.0484 | 0.0532 | 0.5300 | 1.3205 | 0.2505 | 5.5711  |
| order. Bacteroidales. id. 913     | SmallVesselStroke   | Simple mode               | 3 | 1.1952 | 0.5443 | 2.6241  | 0.7003 | -0.0484 | 0.0532 | 0.5300 | 1.3205 | 0.2505 | 5.5711  |
| order. Bacteroidales. id. 913     | SmallVesselStroke   | Weighted mode             | 3 | 1.2213 | 0.5662 | 2.6348  | 0.6609 | -0.0484 | 0.0532 | 0.5300 | 1.3205 | 0.2505 | 5.5711  |
| order. Bacteroidales. id. 913     | Stroke              | MR Egger                  | 3 | 1.1137 | 0.6883 | 1.8021  | 0.7368 | 0.0005  | 0.0172 | 0.9821 | 1.4058 | 0.2358 | 23.7656 |
| order. Bacteroidales. id. 913     | Stroke              | Weighted median           | 3 | 1.1247 | 0.9324 | 1.3567  | 0.2192 | 0.0005  | 0.0172 | 0.9821 | 1.4058 | 0.2358 | 23.7656 |
| order. Bacteroidales. id. 913     | Stroke              | Inverse variance weighted | 3 | 1.1209 | 0.9684 | 1.2973  | 0.1260 | 0.0005  | 0.0172 | 0.9821 | 1.4058 | 0.2358 | 23.7656 |
| order. Bacteroidales. id. 913     | Stroke              | Simple mode               | 3 | 1.1668 | 0.9338 | 1.4578  | 0.3075 | 0.0005  | 0.0172 | 0.9821 | 1.4058 | 0.2358 | 23.7656 |
| order. Bacteroidales. id. 913     | Stroke              | Weighted mode             | 3 | 1.1456 | 0.9125 | 1.4383  | 0.3623 | 0.0005  | 0.0172 | 0.9821 | 1.4058 | 0.2358 | 23.7656 |
| order. Bifidobacteriales. id. 432 | CardioEmbolicStroke | MR Egger                  | 4 | 0.9312 | 0.1220 | 7.1081  | 0.9515 | -0.0128 | 0.0992 | 0.9091 | 3.4180 | 0.1810 | 7.0283  |
| order. Bifidobacteriales. id. 432 | CardioEmbolicStroke | Weighted median           | 4 | 0.9282 | 0.6447 | 1.3365  | 0.6887 | -0.0128 | 0.0992 | 0.9091 | 3.4180 | 0.1810 | 7.0283  |
| order. Bifidobacteriales. id. 432 | CardioEmbolicStroke | Inverse variance weighted | 4 | 0.8163 | 0.6073 | 1.0973  | 0.1788 | -0.0128 | 0.0992 | 0.9091 | 3.4180 | 0.1810 | 7.0283  |
| order. Bifidobacteriales. id. 432 | CardioEmbolicStroke | Simple mode               | 4 | 0.6239 | 0.3517 | 1.1068  | 0.2052 | -0.0128 | 0.0992 | 0.9091 | 3.4180 | 0.1810 | 7.0283  |
| order. Bifidobacteriales. id. 432 | CardioEmbolicStroke | Weighted mode             | 4 | 1.0019 | 0.6309 | 1.5909  | 0.9942 | -0.0128 | 0.0992 | 0.9091 | 3.4180 | 0.1810 | 7.0283  |
| order. Bifidobacteriales. id. 432 | IschemicStroke      | MR Egger                  | 4 | 1.3535 | 0.6843 | 2.6768  | 0.4761 | -0.0378 | 0.0334 | 0.3750 | 2.9372 | 0.4014 | 27.8269 |
| order. Bifidobacteriales. id. 432 | IschemicStroke      | Weighted median           | 4 | 0.9321 | 0.7978 | 1.0890  | 0.3755 | -0.0378 | 0.0334 | 0.3750 | 2.9372 | 0.4014 | 27.8269 |
| order. Bifidobacteriales. id. 432 | IschemicStroke      | Inverse variance weighted | 4 | 0.9183 | 0.8149 | 1.0349  | 0.1624 | -0.0378 | 0.0334 | 0.3750 | 2.9372 | 0.4014 | 27.8269 |

|                                  |                     |                           |   |        |        |         |        |         |        |        |        |        |         |
|----------------------------------|---------------------|---------------------------|---|--------|--------|---------|--------|---------|--------|--------|--------|--------|---------|
| order.Bifidobacteriales. id. 432 | IschemicStroke      | Simple mode               | 4 | 0.9318 | 0.7512 | 1.1558  | 0.5662 | -0.0378 | 0.0334 | 0.3750 | 2.9372 | 0.4014 | 27.8269 |
| order.Bifidobacteriales. id. 432 | IschemicStroke      | Weighted mode             | 4 | 0.9634 | 0.7971 | 1.1643  | 0.7251 | -0.0378 | 0.0334 | 0.3750 | 2.9372 | 0.4014 | 27.8269 |
| order.Burkholderiales. id. 432   | LargeArteryStroke   | MR Egger                  | 3 | 0.1273 | 0.0142 | 1.1434  | 0.3169 | 0.1906  | 0.1033 | 0.3161 | 3.5508 | 0.1694 | 5.7744  |
| order.Bifidobacteriales. id. 432 | LargeArteryStroke   | Weighted median           | 3 | 1.0980 | 0.6457 | 1.8670  | 0.7301 | 0.1906  | 0.1033 | 0.3161 | 3.5508 | 0.1694 | 5.7744  |
| order.Bifidobacteriales. id. 432 | LargeArteryStroke   | Inverse variance weighted | 3 | 0.9702 | 0.5630 | 1.6720  | 0.9133 | 0.1906  | 0.1033 | 0.3161 | 3.5508 | 0.1694 | 5.7744  |
| order.Bifidobacteriales. id. 432 | LargeArteryStroke   | Simple mode               | 3 | 1.4100 | 0.6088 | 3.2658  | 0.5067 | 0.1906  | 0.1033 | 0.3161 | 3.5508 | 0.1694 | 5.7744  |
| order.Bifidobacteriales. id. 432 | LargeArteryStroke   | Weighted mode             | 3 | 0.6525 | 0.3724 | 1.1434  | 0.2743 | 0.1906  | 0.1033 | 0.3161 | 3.5508 | 0.1694 | 5.7744  |
| order.Bifidobacteriales. id. 432 | SmallVesselStroke   | MR Egger                  | 4 | 0.7204 | 0.1070 | 4.8487  | 0.7681 | 0.0313  | 0.0931 | 0.7688 | 1.7963 | 0.4073 | 12.4140 |
| order.Bifidobacteriales. id. 432 | SmallVesselStroke   | Weighted median           | 4 | 0.9886 | 0.6428 | 1.5203  | 0.9583 | 0.0313  | 0.0931 | 0.7688 | 1.7963 | 0.4073 | 12.4140 |
| order.Bifidobacteriales. id. 432 | SmallVesselStroke   | Inverse variance weighted | 4 | 0.9938 | 0.7086 | 1.3938  | 0.9711 | 0.0313  | 0.0931 | 0.7688 | 1.7963 | 0.4073 | 12.4140 |
| order.Bifidobacteriales. id. 432 | SmallVesselStroke   | Simple mode               | 4 | 1.2604 | 0.6961 | 2.2821  | 0.5005 | 0.0313  | 0.0931 | 0.7688 | 1.7963 | 0.4073 | 12.4140 |
| order.Bifidobacteriales. id. 432 | SmallVesselStroke   | Weighted mode             | 4 | 0.8299 | 0.4927 | 1.3978  | 0.5338 | 0.0313  | 0.0931 | 0.7688 | 1.7963 | 0.4073 | 12.4140 |
| order.Bifidobacteriales. id. 432 | Stroke              | MR Egger                  | 4 | 1.0354 | 0.5371 | 1.9962  | 0.9267 | -0.0146 | 0.0321 | 0.6941 | 2.1570 | 0.3401 | 25.2288 |
| order.Bifidobacteriales. id. 432 | Stroke              | Weighted median           | 4 | 0.9296 | 0.8093 | 1.0678  | 0.3019 | -0.0146 | 0.0321 | 0.6941 | 2.1570 | 0.3401 | 25.2288 |
| order.Bifidobacteriales. id. 432 | Stroke              | Inverse variance weighted | 4 | 0.8914 | 0.7979 | 0.9958  | 0.0419 | -0.0146 | 0.0321 | 0.6941 | 2.1570 | 0.3401 | 25.2288 |
| order.Bifidobacteriales. id. 432 | Stroke              | Simple mode               | 4 | 0.9363 | 0.7730 | 1.1342  | 0.5493 | -0.0146 | 0.0321 | 0.6941 | 2.1570 | 0.3401 | 25.2288 |
| order.Bifidobacteriales. id. 432 | Stroke              | Weighted mode             | 4 | 0.9363 | 0.7952 | 1.1024  | 0.4874 | -0.0146 | 0.0321 | 0.6941 | 2.1570 | 0.3401 | 25.2288 |
| order.Burkholderiales. id. 2874  | CardioEmbolicStroke | MR Egger                  | 4 | 1.4511 | 0.5523 | 3.8122  | 0.5288 | -0.0296 | 0.0307 | 0.4372 | 2.3509 | 0.3087 | 14.1800 |
| order.Burkholderiales. id. 2874  | CardioEmbolicStroke | Weighted median           | 4 | 1.0741 | 0.7404 | 1.5581  | 0.7064 | -0.0296 | 0.0307 | 0.4372 | 2.3509 | 0.3087 | 14.1800 |
| order.Burkholderiales. id. 2874  | CardioEmbolicStroke | Inverse variance weighted | 4 | 0.9286 | 0.6717 | 1.2836  | 0.6537 | -0.0296 | 0.0307 | 0.4372 | 2.3509 | 0.3087 | 14.1800 |
| order.Burkholderiales. id. 2874  | CardioEmbolicStroke | Simple mode               | 4 | 1.0918 | 0.6694 | 1.7805  | 0.7482 | -0.0296 | 0.0307 | 0.4372 | 2.3509 | 0.3087 | 14.1800 |
| order.Burkholderiales. id. 2874  | CardioEmbolicStroke | Weighted mode             | 4 | 1.0939 | 0.6953 | 1.7211  | 0.7237 | -0.0296 | 0.0307 | 0.4372 | 2.3509 | 0.3087 | 14.1800 |
| order.Burkholderiales. id. 2874  | IschemicStroke      | MR Egger                  | 4 | 1.1157 | 0.7589 | 1.6404  | 0.6335 | -0.0050 | 0.0123 | 0.7248 | 1.1720 | 0.5566 | 42.9892 |
| order.Burkholderiales. id. 2874  | IschemicStroke      | Weighted median           | 4 | 1.0476 | 0.8931 | 1.2290  | 0.5678 | -0.0050 | 0.0123 | 0.7248 | 1.1720 | 0.5566 | 42.9892 |
| order.Burkholderiales. id. 2874  | IschemicStroke      | Inverse variance weighted | 4 | 1.0353 | 0.9078 | 1.1807  | 0.6049 | -0.0050 | 0.0123 | 0.7248 | 1.1720 | 0.5566 | 42.9892 |
| order.Burkholderiales. id. 2874  | IschemicStroke      | Simple mode               | 4 | 1.0838 | 0.8657 | 1.3567  | 0.5333 | -0.0050 | 0.0123 | 0.7248 | 1.1720 | 0.5566 | 42.9892 |
| order.Burkholderiales. id. 2874  | IschemicStroke      | Weighted mode             | 4 | 1.0753 | 0.8747 | 1.3218  | 0.5402 | -0.0050 | 0.0123 | 0.7248 | 1.1720 | 0.5566 | 42.9892 |
| order.Burkholderiales. id. 2874  | LargeArteryStroke   | MR Egger                  | 4 | 0.3737 | 0.1147 | 1.2178  | 0.2441 | 0.0619  | 0.0377 | 0.2422 | 4.1860 | 0.2421 | 3.4673  |
| order.Burkholderiales. id. 2874  | LargeArteryStroke   | Weighted median           | 4 | 1.0247 | 0.6115 | 1.7173  | 0.9261 | 0.0619  | 0.0377 | 0.2422 | 4.1860 | 0.2421 | 3.4673  |
| order.Burkholderiales. id. 2874  | LargeArteryStroke   | Inverse variance weighted | 4 | 0.9482 | 0.5906 | 1.5224  | 0.8257 | 0.0619  | 0.0377 | 0.2422 | 4.1860 | 0.2421 | 3.4673  |
| order.Burkholderiales. id. 2874  | LargeArteryStroke   | Simple mode               | 4 | 1.2026 | 0.5122 | 2.8234  | 0.7003 | 0.0619  | 0.0377 | 0.2422 | 4.1860 | 0.2421 | 3.4673  |
| order.Burkholderiales. id. 2874  | LargeArteryStroke   | Weighted mode             | 4 | 1.1825 | 0.5227 | 2.6748  | 0.7143 | 0.0619  | 0.0377 | 0.2422 | 4.1860 | 0.2421 | 3.4673  |
| order.Burkholderiales. id. 2874  | SmallVesselStroke   | MR Egger                  | 4 | 0.9277 | 0.2917 | 2.9502  | 0.9105 | -0.0047 | 0.0364 | 0.9082 | 0.0894 | 0.9563 | 21.4013 |
| order.Burkholderiales. id. 2874  | SmallVesselStroke   | Weighted median           | 4 | 0.8625 | 0.5580 | 1.3333  | 0.5058 | -0.0047 | 0.0364 | 0.9082 | 0.0894 | 0.9563 | 21.4013 |
| order.Burkholderiales. id. 2874  | SmallVesselStroke   | Inverse variance weighted | 4 | 0.8627 | 0.5898 | 1.2620  | 0.4467 | -0.0047 | 0.0364 | 0.9082 | 0.0894 | 0.9563 | 21.4013 |
| order.Burkholderiales. id. 2874  | SmallVesselStroke   | Simple mode               | 4 | 0.8644 | 0.4984 | 1.4992  | 0.6398 | -0.0047 | 0.0364 | 0.9082 | 0.0894 | 0.9563 | 21.4013 |
| order.Burkholderiales. id. 2874  | SmallVesselStroke   | Weighted mode             | 4 | 0.8682 | 0.4959 | 1.5202  | 0.6549 | -0.0047 | 0.0364 | 0.9082 | 0.0894 | 0.9563 | 21.4013 |
| order.Burkholderiales. id. 2874  | Stroke              | MR Egger                  | 4 | 1.0255 | 0.6478 | 1.6234  | 0.9241 | -0.0003 | 0.0146 | 0.9857 | 3.3195 | 0.1902 | 44.7850 |
| order.Burkholderiales. id. 2874  | Stroke              | Weighted median           | 4 | 1.0121 | 0.8743 | 1.1716  | 0.8718 | -0.0003 | 0.0146 | 0.9857 | 3.3195 | 0.1902 | 44.7850 |
| order.Burkholderiales. id. 2874  | Stroke              | Inverse variance weighted | 4 | 1.0210 | 0.8987 | 1.1599  | 0.7498 | -0.0003 | 0.0146 | 0.9857 | 3.3195 | 0.1902 | 44.7850 |
| order.Burkholderiales. id. 2874  | Stroke              | Simple mode               | 4 | 0.9926 | 0.8021 | 1.2283  | 0.9499 | -0.0003 | 0.0146 | 0.9857 | 3.3195 | 0.1902 | 44.7850 |
| order.Burkholderiales. id. 2874  | Stroke              | Weighted mode             | 4 | 1.0046 | 0.8227 | 1.2266  | 0.9671 | -0.0003 | 0.0146 | 0.9857 | 3.3195 | 0.1902 | 44.7850 |
| order.Clostridiales. id. 1863    | CardioEmbolicStroke | MR Egger                  | 4 | 0.9254 | 0.0858 | 9.9790  | 0.9549 | 0.0030  | 0.0683 | 0.9689 | 3.9568 | 0.1383 | 7.9891  |
| order.Clostridiales. id. 1863    | CardioEmbolicStroke | Weighted median           | 4 | 0.8708 | 0.5546 | 1.3672  | 0.5478 | 0.0030  | 0.0683 | 0.9689 | 3.9568 | 0.1383 | 7.9891  |
| order.Clostridiales. id. 1863    | CardioEmbolicStroke | Inverse variance weighted | 4 | 0.9750 | 0.6423 | 1.4800  | 0.9053 | 0.0030  | 0.0683 | 0.9689 | 3.9568 | 0.1383 | 7.9891  |
| order.Clostridiales. id. 1863    | CardioEmbolicStroke | Simple mode               | 4 | 0.7996 | 0.4139 | 1.5446  | 0.5531 | 0.0030  | 0.0683 | 0.9689 | 3.9568 | 0.1383 | 7.9891  |
| order.Clostridiales. id. 1863    | CardioEmbolicStroke | Weighted mode             | 4 | 0.7964 | 0.4020 | 1.5777  | 0.5605 | 0.0030  | 0.0683 | 0.9689 | 3.9568 | 0.1383 | 7.9891  |
| order.Clostridiales. id. 1863    | IschemicStroke      | MR Egger                  | 4 | 0.7687 | 0.3689 | 1.6015  | 0.5551 | 0.0054  | 0.0211 | 0.8208 | 0.1297 | 0.9372 | 14.1148 |
| order.Clostridiales. id. 1863    | IschemicStroke      | Weighted median           | 4 | 0.8477 | 0.7042 | 1.0204  | 0.0808 | 0.0054  | 0.0211 | 0.8208 | 0.1297 | 0.9372 | 14.1148 |
| order.Clostridiales. id. 1863    | IschemicStroke      | Inverse variance weighted | 4 | 0.8447 | 0.7224 | 0.9875  | 0.0342 | 0.0054  | 0.0211 | 0.8208 | 0.1297 | 0.9372 | 14.1148 |
| order.Clostridiales. id. 1863    | IschemicStroke      | Simple mode               | 4 | 0.8170 | 0.6525 | 1.0230  | 0.1763 | 0.0054  | 0.0211 | 0.8208 | 0.1297 | 0.9372 | 14.1148 |
| order.Clostridiales. id. 1863    | IschemicStroke      | Weighted mode             | 4 | 0.8699 | 0.6898 | 1.0971  | 0.3241 | 0.0054  | 0.0211 | 0.8208 | 0.1297 | 0.9372 | 14.1148 |
| order.Clostridiales. id. 1863    | LargeArteryStroke   | MR Egger                  | 4 | 3.5193 | 0.3648 | 33.9466 | 0.3902 | -0.0729 | 0.0654 | 0.3806 | 1.6888 | 0.6394 | 5.1910  |
| order.Clostridiales. id. 1863    | LargeArteryStroke   | Weighted median           | 4 | 0.8858 | 0.5039 | 1.5572  | 0.6735 | -0.0729 | 0.0654 | 0.3806 | 1.6888 | 0.6394 | 5.1910  |

|                                  |                     |                           |   |        |        |         |        |         |        |        |        |        |         |
|----------------------------------|---------------------|---------------------------|---|--------|--------|---------|--------|---------|--------|--------|--------|--------|---------|
| order.Clostridiales.id.1863      | LargeArteryStroke   | Inverse variance weighted | 4 | 0.9990 | 0.6098 | 1.6367  | 0.9970 | -0.0729 | 0.0654 | 0.3806 | 1.6888 | 0.6394 | 5.1910  |
| order.Clostridiales.id.1863      | LargeArteryStroke   | Simple mode               | 4 | 0.8044 | 0.3226 | 2.0056  | 0.6724 | -0.0729 | 0.0654 | 0.3806 | 1.6888 | 0.6394 | 5.1910  |
| order.Clostridiales.id.1863      | LargeArteryStroke   | Weighted mode             | 4 | 0.7841 | 0.3558 | 1.7280  | 0.5889 | -0.0729 | 0.0654 | 0.3806 | 1.6888 | 0.6394 | 5.1910  |
| order.Clostridiales.id.1863      | SmallVesselStroke   | MR Egger                  | 4 | 2.9276 | 0.2864 | 29.9221 | 0.4607 | -0.0910 | 0.0669 | 0.3066 | 4.7620 | 0.1901 | 2.7606  |
| order.Clostridiales.id.1863      | SmallVesselStroke   | Weighted median           | 4 | 0.6818 | 0.3835 | 1.2121  | 0.1920 | -0.0910 | 0.0669 | 0.3066 | 4.7620 | 0.1901 | 2.7606  |
| order.Clostridiales.id.1863      | SmallVesselStroke   | Inverse variance weighted | 4 | 0.6054 | 0.3431 | 1.0685  | 0.0834 | -0.0910 | 0.0669 | 0.3066 | 4.7620 | 0.1901 | 2.7606  |
| order.Clostridiales.id.1863      | SmallVesselStroke   | Simple mode               | 4 | 0.8770 | 0.3194 | 2.4079  | 0.8154 | -0.0910 | 0.0669 | 0.3066 | 4.7620 | 0.1901 | 2.7606  |
| order.Clostridiales.id.1863      | SmallVesselStroke   | Weighted mode             | 4 | 0.8897 | 0.3654 | 2.1666  | 0.8136 | -0.0910 | 0.0669 | 0.3066 | 4.7620 | 0.1901 | 2.7606  |
| order.Clostridiales.id.1863      | Stroke              | MR Egger                  | 4 | 0.8612 | 0.4396 | 1.6869  | 0.7056 | -0.0019 | 0.0193 | 0.9300 | 0.2421 | 0.8860 | 14.6649 |
| order.Clostridiales.id.1863      | Stroke              | Weighted median           | 4 | 0.8319 | 0.7045 | 0.9825  | 0.0301 | -0.0019 | 0.0193 | 0.9300 | 0.2421 | 0.8860 | 14.6649 |
| order.Clostridiales.id.1863      | Stroke              | Inverse variance weighted | 4 | 0.8330 | 0.7211 | 0.9623  | 0.0131 | -0.0019 | 0.0193 | 0.9300 | 0.2421 | 0.8860 | 14.6649 |
| order.Clostridiales.id.1863      | Stroke              | Simple mode               | 4 | 0.8193 | 0.6550 | 1.0248  | 0.1792 | -0.0019 | 0.0193 | 0.9300 | 0.2421 | 0.8860 | 14.6649 |
| order.Clostridiales.id.1863      | Stroke              | Weighted mode             | 4 | 0.8219 | 0.6583 | 1.0263  | 0.1819 | -0.0019 | 0.0193 | 0.9300 | 0.2421 | 0.8860 | 14.6649 |
| order.Coriobacteriales.id.810    | CardioEmbolicStroke | MR Egger                  | 4 | 0.3803 | 0.0776 | 1.8624  | 0.3553 | 0.0758  | 0.0677 | 0.3790 | 1.9272 | 0.5877 | 11.8413 |
| order.Coriobacteriales.id.810    | CardioEmbolicStroke | Weighted median           | 4 | 0.8838 | 0.6043 | 1.2926  | 0.5242 | 0.0758  | 0.0677 | 0.3790 | 1.9272 | 0.5877 | 11.8413 |
| order.Coriobacteriales.id.810    | CardioEmbolicStroke | Inverse variance weighted | 4 | 0.9244 | 0.6640 | 1.2868  | 0.6413 | 0.0758  | 0.0677 | 0.3790 | 1.9272 | 0.5877 | 11.8413 |
| order.Coriobacteriales.id.810    | CardioEmbolicStroke | Simple mode               | 4 | 0.8390 | 0.4592 | 1.5331  | 0.6081 | 0.0758  | 0.0677 | 0.3790 | 1.9272 | 0.5877 | 11.8413 |
| order.Coriobacteriales.id.810    | CardioEmbolicStroke | Weighted mode             | 4 | 0.8463 | 0.4661 | 1.5366  | 0.6216 | 0.0758  | 0.0677 | 0.3790 | 1.9272 | 0.5877 | 11.8413 |
| order.Coriobacteriales.id.810    | IschemicStroke      | MR Egger                  | 4 | 1.1748 | 0.3547 | 3.8912  | 0.8167 | -0.0155 | 0.0511 | 0.7904 | 5.9981 | 0.0498 | 16.1116 |
| order.Coriobacteriales.id.810    | IschemicStroke      | Weighted median           | 4 | 0.9805 | 0.8106 | 1.1861  | 0.8396 | -0.0155 | 0.0511 | 0.7904 | 5.9981 | 0.0498 | 16.1116 |
| order.Coriobacteriales.id.810    | IschemicStroke      | Inverse variance weighted | 4 | 0.9802 | 0.7945 | 1.2093  | 0.8519 | -0.0155 | 0.0511 | 0.7904 | 5.9981 | 0.0498 | 16.1116 |
| order.Coriobacteriales.id.810    | IschemicStroke      | Simple mode               | 4 | 0.9703 | 0.7020 | 1.3412  | 0.8668 | -0.0155 | 0.0511 | 0.7904 | 5.9981 | 0.0498 | 16.1116 |
| order.Coriobacteriales.id.810    | IschemicStroke      | Weighted mode             | 4 | 0.9783 | 0.7227 | 1.3244  | 0.8963 | -0.0155 | 0.0511 | 0.7904 | 5.9981 | 0.0498 | 16.1116 |
| order.Coriobacteriales.id.810    | LargeArteryStroke   | MR Egger                  | 4 | 2.3036 | 0.2502 | 21.2109 | 0.5380 | -0.0637 | 0.0948 | 0.5708 | 2.0279 | 0.3628 | 5.8616  |
| order.Coriobacteriales.id.810    | LargeArteryStroke   | Weighted median           | 4 | 1.0872 | 0.6319 | 1.8704  | 0.7627 | -0.0637 | 0.0948 | 0.5708 | 2.0279 | 0.3628 | 5.8616  |
| order.Coriobacteriales.id.810    | LargeArteryStroke   | Inverse variance weighted | 4 | 1.0936 | 0.6956 | 1.7193  | 0.6984 | -0.0637 | 0.0948 | 0.5708 | 2.0279 | 0.3628 | 5.8616  |
| order.Coriobacteriales.id.810    | LargeArteryStroke   | Simple mode               | 4 | 1.0989 | 0.4892 | 2.4687  | 0.8340 | -0.0637 | 0.0948 | 0.5708 | 2.0279 | 0.3628 | 5.8616  |
| order.Coriobacteriales.id.810    | LargeArteryStroke   | Weighted mode             | 4 | 1.0989 | 0.5000 | 2.4154  | 0.8295 | -0.0637 | 0.0948 | 0.5708 | 2.0279 | 0.3628 | 5.8616  |
| order.Coriobacteriales.id.810    | SmallVesselStroke   | MR Egger                  | 4 | 1.8133 | 0.2532 | 12.9886 | 0.6136 | -0.0733 | 0.0833 | 0.4718 | 0.8258 | 0.8433 | 10.3831 |
| order.Coriobacteriales.id.810    | SmallVesselStroke   | Weighted median           | 4 | 0.7899 | 0.4893 | 1.2754  | 0.3347 | -0.0733 | 0.0833 | 0.4718 | 0.8258 | 0.8433 | 10.3831 |
| order.Coriobacteriales.id.810    | SmallVesselStroke   | Inverse variance weighted | 4 | 0.7642 | 0.5059 | 1.1543  | 0.2012 | -0.0733 | 0.0833 | 0.4718 | 0.8258 | 0.8433 | 10.3831 |
| order.Coriobacteriales.id.810    | SmallVesselStroke   | Simple mode               | 4 | 0.8208 | 0.4327 | 1.5569  | 0.5880 | -0.0733 | 0.0833 | 0.4718 | 0.8258 | 0.8433 | 10.3831 |
| order.Coriobacteriales.id.810    | SmallVesselStroke   | Weighted mode             | 4 | 0.8386 | 0.4466 | 1.5746  | 0.6221 | -0.0733 | 0.0833 | 0.4718 | 0.8258 | 0.8433 | 10.3831 |
| order.Coriobacteriales.id.810    | Stroke              | MR Egger                  | 4 | 1.1884 | 0.2890 | 4.8869  | 0.8332 | -0.0145 | 0.0600 | 0.8313 | 9.8865 | 0.0071 | 12.7061 |
| order.Coriobacteriales.id.810    | Stroke              | Weighted median           | 4 | 0.9793 | 0.8150 | 1.1768  | 0.8234 | -0.0145 | 0.0600 | 0.8313 | 9.8865 | 0.0071 | 12.7061 |
| order.Coriobacteriales.id.810    | Stroke              | Inverse variance weighted | 4 | 1.0019 | 0.7830 | 1.2820  | 0.9879 | -0.0145 | 0.0600 | 0.8313 | 9.8865 | 0.0071 | 12.7061 |
| order.Coriobacteriales.id.810    | Stroke              | Simple mode               | 4 | 0.9037 | 0.6486 | 1.2593  | 0.5920 | -0.0145 | 0.0600 | 0.8313 | 9.8865 | 0.0071 | 12.7061 |
| order.Coriobacteriales.id.810    | Stroke              | Weighted mode             | 4 | 0.9300 | 0.6733 | 1.2846  | 0.6894 | -0.0145 | 0.0600 | 0.8313 | 9.8865 | 0.0071 | 12.7061 |
| order.Desulfovibrionales.id.3156 | CardioEmbolicStroke | MR Egger                  | 4 | 0.1706 | 0.0286 | 1.0187  | 0.1920 | 0.0874  | 0.0542 | 0.2481 | 3.6650 | 0.3000 | 3.4569  |
| order.Desulfovibrionales.id.3156 | CardioEmbolicStroke | Weighted median           | 4 | 0.7404 | 0.5075 | 1.0803  | 0.1190 | 0.0874  | 0.0542 | 0.2481 | 3.6650 | 0.3000 | 3.4569  |
| order.Desulfovibrionales.id.3156 | CardioEmbolicStroke | Inverse variance weighted | 4 | 0.7277 | 0.5260 | 1.0068  | 0.0549 | 0.0874  | 0.0542 | 0.2481 | 3.6650 | 0.3000 | 3.4569  |
| order.Desulfovibrionales.id.3156 | CardioEmbolicStroke | Simple mode               | 4 | 0.7375 | 0.4228 | 1.2864  | 0.3620 | 0.0874  | 0.0542 | 0.2481 | 3.6650 | 0.3000 | 3.4569  |
| order.Desulfovibrionales.id.3156 | CardioEmbolicStroke | Weighted mode             | 4 | 0.7496 | 0.4255 | 1.3207  | 0.3921 | 0.0874  | 0.0542 | 0.2481 | 3.6650 | 0.3000 | 3.4569  |
| order.Desulfovibrionales.id.3156 | IschemicStroke      | MR Egger                  | 4 | 0.1425 | 0.0255 | 0.7965  | 0.1567 | 0.1102  | 0.0524 | 0.1705 | #####  | 0.0000 | 4.2006  |
| order.Desulfovibrionales.id.3156 | IschemicStroke      | Weighted median           | 4 | 0.9029 | 0.7288 | 1.1186  | 0.3498 | 0.1102  | 0.0524 | 0.1705 | #####  | 0.0000 | 4.2006  |
| order.Desulfovibrionales.id.3156 | IschemicStroke      | Inverse variance weighted | 4 | 0.8774 | 0.5743 | 1.3405  | 0.5454 | 0.1102  | 0.0524 | 0.1705 | #####  | 0.0000 | 4.2006  |
| order.Desulfovibrionales.id.3156 | IschemicStroke      | Simple mode               | 4 | 0.8433 | 0.5614 | 1.2668  | 0.4718 | 0.1102  | 0.0524 | 0.1705 | #####  | 0.0000 | 4.2006  |
| order.Desulfovibrionales.id.3156 | IschemicStroke      | Weighted mode             | 4 | 0.8996 | 0.6356 | 1.2731  | 0.5924 | 0.1102  | 0.0524 | 0.1705 | #####  | 0.0000 | 4.2006  |
| order.Desulfovibrionales.id.3156 | LargeArteryStroke   | MR Egger                  | 4 | 0.9055 | 0.0346 | 23.6783 | 0.9579 | 0.0069  | 0.0989 | 0.9507 | 3.7295 | 0.1549 | 5.9869  |
| order.Desulfovibrionales.id.3156 | LargeArteryStroke   | Weighted median           | 4 | 1.0997 | 0.6819 | 1.7733  | 0.6968 | 0.0069  | 0.0989 | 0.9507 | 3.7295 | 0.1549 | 5.9869  |
| order.Desulfovibrionales.id.3156 | LargeArteryStroke   | Inverse variance weighted | 4 | 1.0154 | 0.6551 | 1.5738  | 0.9455 | 0.0069  | 0.0989 | 0.9507 | 3.7295 | 0.1549 | 5.9869  |
| order.Desulfovibrionales.id.3156 | LargeArteryStroke   | Simple mode               | 4 | 1.1781 | 0.5787 | 2.3982  | 0.6821 | 0.0069  | 0.0989 | 0.9507 | 3.7295 | 0.1549 | 5.9869  |
| order.Desulfovibrionales.id.3156 | LargeArteryStroke   | Weighted mode             | 4 | 1.1614 | 0.5904 | 2.2846  | 0.6940 | 0.0069  | 0.0989 | 0.9507 | 3.7295 | 0.1549 | 5.9869  |
| order.Desulfovibrionales.id.3156 | SmallVesselStroke   | MR Egger                  | 4 | 0.1273 | 0.0015 | 10.8094 | 0.4591 | 0.1258  | 0.1345 | 0.4483 | #####  | 0.0104 | 2.6069  |

|                                   |                     |                           |   |        |        |           |        |         |        |        |        |        |          |
|-----------------------------------|---------------------|---------------------------|---|--------|--------|-----------|--------|---------|--------|--------|--------|--------|----------|
| order.Desulfovibrionales.id.3156  | SmallVesselStroke   | Weighted median           | 4 | 0.7811 | 0.4877 | 1.2510    | 0.3039 | 0.1258  | 0.1345 | 0.4483 | #####  | 0.0104 | 2.6069   |
| order.Desulfovibrionales.id.3156  | SmallVesselStroke   | Inverse variance weighted | 4 | 1.0305 | 0.5052 | 2.1017    | 0.9342 | 0.1258  | 0.1345 | 0.4483 | #####  | 0.0104 | 2.6069   |
| order.Desulfovibrionales.id.3156  | SmallVesselStroke   | Simple mode               | 4 | 0.7342 | 0.4178 | 1.2902    | 0.3614 | 0.1258  | 0.1345 | 0.4483 | #####  | 0.0104 | 2.6069   |
| order.Desulfovibrionales.id.3156  | SmallVesselStroke   | Weighted mode             | 4 | 0.7219 | 0.4246 | 1.2274    | 0.3152 | 0.1258  | 0.1345 | 0.4483 | #####  | 0.0104 | 2.6069   |
| order.Desulfovibrionales.id.3156  | Stroke              | MR Egger                  | 4 | 0.1599 | 0.0339 | 0.7555    | 0.1467 | 0.1034  | 0.0473 | 0.1605 | #####  | 0.0000 | 4.6247   |
| order.Desulfovibrionales.id.3156  | Stroke              | Weighted median           | 4 | 0.9069 | 0.7454 | 1.1035    | 0.3291 | 0.1034  | 0.0473 | 0.1605 | #####  | 0.0000 | 4.6247   |
| order.Desulfovibrionales.id.3156  | Stroke              | Inverse variance weighted | 4 | 0.8805 | 0.5940 | 1.3051    | 0.5262 | 0.1034  | 0.0473 | 0.1605 | #####  | 0.0000 | 4.6247   |
| order.Desulfovibrionales.id.3156  | Stroke              | Simple mode               | 4 | 0.8657 | 0.6074 | 1.2338    | 0.4833 | 0.1034  | 0.0473 | 0.1605 | #####  | 0.0000 | 4.6247   |
| order.Desulfovibrionales.id.3156  | Stroke              | Weighted mode             | 4 | 0.9012 | 0.6970 | 1.1653    | 0.4856 | 0.1034  | 0.0473 | 0.1605 | #####  | 0.0000 | 4.6247   |
| order.Erysipelotrichales.id.2148  | CardioEmbolicStroke | MR Egger                  | 3 | 1.1245 | 0.0237 | 53.4169   | 0.9621 | 0.0214  | 0.1615 | 0.9162 | 3.5596 | 0.0592 | 3.7278   |
| order.Erysipelotrichales.id.2148  | CardioEmbolicStroke | Weighted median           | 3 | 1.4138 | 0.8276 | 2.4150    | 0.2050 | 0.0214  | 0.1615 | 0.9162 | 3.5596 | 0.0592 | 3.7278   |
| order.Erysipelotrichales.id.2148  | CardioEmbolicStroke | Inverse variance weighted | 3 | 1.4537 | 0.8923 | 2.3683    | 0.1330 | 0.0214  | 0.1615 | 0.9162 | 3.5596 | 0.0592 | 3.7278   |
| order.Erysipelotrichales.id.2148  | CardioEmbolicStroke | Simple mode               | 3 | 1.4355 | 0.7600 | 2.7115    | 0.3811 | 0.0214  | 0.1615 | 0.9162 | 3.5596 | 0.0592 | 3.7278   |
| order.Erysipelotrichales.id.2148  | CardioEmbolicStroke | Weighted mode             | 3 | 1.4275 | 0.7431 | 2.7423    | 0.3971 | 0.0214  | 0.1615 | 0.9162 | 3.5596 | 0.0592 | 3.7278   |
| order.Erysipelotrichales.id.2148  | IschemicStroke      | MR Egger                  | 3 | 1.1424 | 0.4704 | 2.7742    | 0.8179 | -0.0082 | 0.0374 | 0.8618 | 0.0491 | 0.8246 | 80.9974  |
| order.Erysipelotrichales.id.2148  | IschemicStroke      | Weighted median           | 3 | 1.0310 | 0.8623 | 1.2327    | 0.7378 | -0.0082 | 0.0374 | 0.8618 | 0.0491 | 0.8246 | 80.9974  |
| order.Erysipelotrichales.id.2148  | IschemicStroke      | Inverse variance weighted | 3 | 1.0354 | 0.8850 | 1.2113    | 0.6639 | -0.0082 | 0.0374 | 0.8618 | 0.0491 | 0.8246 | 80.9974  |
| order.Erysipelotrichales.id.2148  | IschemicStroke      | Simple mode               | 3 | 1.0247 | 0.8292 | 1.2663    | 0.8421 | -0.0082 | 0.0374 | 0.8618 | 0.0491 | 0.8246 | 80.9974  |
| order.Erysipelotrichales.id.2148  | IschemicStroke      | Weighted mode             | 3 | 1.0217 | 0.8329 | 1.2534    | 0.8557 | -0.0082 | 0.0374 | 0.8618 | 0.0491 | 0.8246 | 80.9974  |
| order.Erysipelotrichales.id.2148  | LargeArteryStroke   | MR Egger                  | 3 | 3.9301 | 0.0147 | 1049.3888 | 0.7150 | -0.1245 | 0.2331 | 0.6877 | 3.8991 | 0.0483 | 2.1701   |
| order.Erysipelotrichales.id.2148  | LargeArteryStroke   | Weighted median           | 3 | 0.6865 | 0.3622 | 1.3011    | 0.2488 | -0.1245 | 0.2331 | 0.6877 | 3.8991 | 0.0483 | 2.1701   |
| order.Erysipelotrichales.id.2148  | LargeArteryStroke   | Inverse variance weighted | 3 | 0.8776 | 0.4018 | 1.9169    | 0.7433 | -0.1245 | 0.2331 | 0.6877 | 3.8991 | 0.0483 | 2.1701   |
| order.Erysipelotrichales.id.2148  | LargeArteryStroke   | Simple mode               | 3 | 0.6439 | 0.3095 | 1.3396    | 0.3600 | -0.1245 | 0.2331 | 0.6877 | 3.8991 | 0.0483 | 2.1701   |
| order.Erysipelotrichales.id.2148  | LargeArteryStroke   | Weighted mode             | 3 | 0.6474 | 0.3060 | 1.3700    | 0.3735 | -0.1245 | 0.2331 | 0.6877 | 3.8991 | 0.0483 | 2.1701   |
| order.Erysipelotrichales.id.2148  | SmallVesselStroke   | MR Egger                  | 3 | 0.9585 | 0.0723 | 12.7034   | 0.9796 | -0.0152 | 0.1078 | 0.9107 | 0.0530 | 0.8179 | 13.1813  |
| order.Erysipelotrichales.id.2148  | SmallVesselStroke   | Weighted median           | 3 | 0.7748 | 0.4602 | 1.3045    | 0.3370 | -0.0152 | 0.1078 | 0.9107 | 0.0530 | 0.8179 | 13.1813  |
| order.Erysipelotrichales.id.2148  | SmallVesselStroke   | Inverse variance weighted | 3 | 0.7981 | 0.5076 | 1.2547    | 0.3286 | -0.0152 | 0.1078 | 0.9107 | 0.0530 | 0.8179 | 13.1813  |
| order.Erysipelotrichales.id.2148  | SmallVesselStroke   | Simple mode               | 3 | 0.7705 | 0.4181 | 1.4198    | 0.4911 | -0.0152 | 0.1078 | 0.9107 | 0.0530 | 0.8179 | 13.1813  |
| order.Erysipelotrichales.id.2148  | SmallVesselStroke   | Weighted mode             | 3 | 0.7709 | 0.4249 | 1.3984    | 0.4820 | -0.0152 | 0.1078 | 0.9107 | 0.0530 | 0.8179 | 13.1813  |
| order.Erysipelotrichales.id.2148  | Stroke              | MR Egger                  | 3 | 1.3852 | 0.6104 | 3.1434    | 0.5786 | -0.0251 | 0.0345 | 0.5998 | 0.3773 | 0.5391 | 47.1640  |
| order.Erysipelotrichales.id.2148  | Stroke              | Weighted median           | 3 | 1.0235 | 0.8594 | 1.2189    | 0.7948 | -0.0251 | 0.0345 | 0.5998 | 0.3773 | 0.5391 | 47.1640  |
| order.Erysipelotrichales.id.2148  | Stroke              | Inverse variance weighted | 3 | 1.0270 | 0.8883 | 1.1874    | 0.7186 | -0.0251 | 0.0345 | 0.5998 | 0.3773 | 0.5391 | 47.1640  |
| order.Erysipelotrichales.id.2148  | Stroke              | Simple mode               | 3 | 1.0210 | 0.8366 | 1.2461    | 0.8567 | -0.0251 | 0.0345 | 0.5998 | 0.3773 | 0.5391 | 47.1640  |
| order.Erysipelotrichales.id.2148  | Stroke              | Weighted mode             | 3 | 1.0023 | 0.8090 | 1.2419    | 0.9849 | -0.0251 | 0.0345 | 0.5998 | 0.3773 | 0.5391 | 47.1640  |
| order.Gastranaerophilales.id.1591 | CardioEmbolicStroke | Inverse variance weighted | 2 | 0.8963 | 0.6992 | 1.1490    | 0.3877 | NA      | NA     | NA     | 0.0589 | 0.8083 | 27.2532  |
| order.Gastranaerophilales.id.1591 | IschemicStroke      | Inverse variance weighted | 2 | 0.9840 | 0.8849 | 1.0943    | 0.7667 | NA      | NA     | NA     | 0.1353 | 0.7130 | 207.9751 |
| order.Gastranaerophilales.id.1591 | LargeArteryStroke   | Inverse variance weighted | 2 | 0.9338 | 0.5166 | 1.6880    | 0.8207 | NA      | NA     | NA     | 3.2586 | 0.0711 | 7.6561   |
| order.Gastranaerophilales.id.1591 | SmallVesselStroke   | Inverse variance weighted | 2 | 1.0304 | 0.6871 | 1.5452    | 0.8849 | NA      | NA     | NA     | 1.7340 | 0.1879 | 13.7231  |
| order.Gastranaerophilales.id.1591 | Stroke              | Inverse variance weighted | 2 | 0.9881 | 0.8960 | 1.0898    | 0.8109 | NA      | NA     | NA     | 0.0024 | 0.9605 | 320.2030 |
| order.Lactobacillales.id.1800     | CardioEmbolicStroke | MR Egger                  | 3 | 0.0112 | 0.0000 | 630.9378  | 0.5684 | 0.4607  | 0.5687 | 0.5665 | 0.7091 | 0.7015 | 19.9750  |
| order.Lactobacillales.id.1800     | CardioEmbolicStroke | Weighted median           | 3 | 1.0744 | 0.6957 | 1.6593    | 0.7461 | 0.4607  | 0.5687 | 0.5665 | 0.7091 | 0.7015 | 19.9750  |
| order.Lactobacillales.id.1800     | CardioEmbolicStroke | Inverse variance weighted | 3 | 1.0255 | 0.7121 | 1.4767    | 0.8924 | 0.4607  | 0.5687 | 0.5665 | 0.7091 | 0.7015 | 19.9750  |
| order.Lactobacillales.id.1800     | CardioEmbolicStroke | Simple mode               | 3 | 1.1176 | 0.6769 | 1.8453    | 0.7062 | 0.4607  | 0.5687 | 0.5665 | 0.7091 | 0.7015 | 19.9750  |
| order.Lactobacillales.id.1800     | CardioEmbolicStroke | Weighted mode             | 3 | 1.1176 | 0.6485 | 1.9261    | 0.7275 | 0.4607  | 0.5687 | 0.5665 | 0.7091 | 0.7015 | 19.9750  |
| order.Lactobacillales.id.1800     | IschemicStroke      | MR Egger                  | 3 | 0.0158 | 0.0002 | 1.5291    | 0.3262 | 0.4212  | 0.2380 | 0.3274 | 3.1613 | 0.2058 | 23.1485  |
| order.Lactobacillales.id.1800     | IschemicStroke      | Weighted median           | 3 | 0.9926 | 0.7924 | 1.2434    | 0.9484 | 0.4212  | 0.2380 | 0.3274 | 3.1613 | 0.2058 | 23.1485  |
| order.Lactobacillales.id.1800     | IschemicStroke      | Inverse variance weighted | 3 | 0.9791 | 0.8044 | 1.1916    | 0.8330 | 0.4212  | 0.2380 | 0.3274 | 3.1613 | 0.2058 | 23.1485  |
| order.Lactobacillales.id.1800     | IschemicStroke      | Simple mode               | 3 | 1.0158 | 0.7686 | 1.3425    | 0.9224 | 0.4212  | 0.2380 | 0.3274 | 3.1613 | 0.2058 | 23.1485  |
| order.Lactobacillales.id.1800     | IschemicStroke      | Weighted mode             | 3 | 1.0223 | 0.7653 | 1.3656    | 0.8950 | 0.4212  | 0.2380 | 0.3274 | 3.1613 | 0.2058 | 23.1485  |
| order.Lactobacillales.id.1800     | LargeArteryStroke   | MR Egger                  | 3 | 0.1098 | 0.0000 | #####     | 0.8192 | 0.1711  | 0.7711 | 0.8610 | 0.4921 | 0.4830 | 3.3425   |
| order.Lactobacillales.id.1800     | LargeArteryStroke   | Weighted median           | 3 | 0.6443 | 0.3484 | 1.1915    | 0.1611 | 0.1711  | 0.7711 | 0.8610 | 0.4921 | 0.4830 | 3.3425   |
| order.Lactobacillales.id.1800     | LargeArteryStroke   | Inverse variance weighted | 3 | 0.5884 | 0.3611 | 0.9586    | 0.0332 | 0.1711  | 0.7711 | 0.8610 | 0.4921 | 0.4830 | 3.3425   |
| order.Lactobacillales.id.1800     | LargeArteryStroke   | Simple mode               | 3 | 0.6715 | 0.3318 | 1.3592    | 0.3836 | 0.1711  | 0.7711 | 0.8610 | 0.4921 | 0.4830 | 3.3425   |
| order.Lactobacillales.id.1800     | LargeArteryStroke   | Weighted mode             | 3 | 0.6754 | 0.3318 | 1.3750    | 0.3924 | 0.1711  | 0.7711 | 0.8610 | 0.4921 | 0.4830 | 3.3425   |

|                                 |                     |                           |   |        |        |        |        |         |        |        |        |        |          |
|---------------------------------|---------------------|---------------------------|---|--------|--------|--------|--------|---------|--------|--------|--------|--------|----------|
| order.Lactobacillales.id.1800   | SmallVesselStroke   | MR Egger                  | 3 | 0.0996 | 0.0000 | #####  | 0.8026 | 0.2516  | 0.7338 | 0.7897 | 0.1201 | 0.9417 | 18.5442  |
| order.Lactobacillales.id.1800   | SmallVesselStroke   | Weighted median           | 3 | 1.1525 | 0.6600 | 2.0128 | 0.6177 | 0.2516  | 0.7338 | 0.7897 | 0.1201 | 0.9417 | 18.5442  |
| order.Lactobacillales.id.1800   | SmallVesselStroke   | Inverse variance weighted | 3 | 1.1736 | 0.7363 | 1.8705 | 0.5010 | 0.2516  | 0.7338 | 0.7897 | 0.1201 | 0.9417 | 18.5442  |
| order.Lactobacillales.id.1800   | SmallVesselStroke   | Simple mode               | 3 | 1.1184 | 0.6170 | 2.0271 | 0.7477 | 0.2516  | 0.7338 | 0.7897 | 0.1201 | 0.9417 | 18.5442  |
| order.Lactobacillales.id.1800   | SmallVesselStroke   | Weighted mode             | 3 | 1.1254 | 0.5988 | 2.1149 | 0.7488 | 0.2516  | 0.7338 | 0.7897 | 0.1201 | 0.9417 | 18.5442  |
| order.Lactobacillales.id.1800   | Stroke              | MR Egger                  | 3 | 0.0109 | 0.0002 | 0.7346 | 0.2825 | 0.4585  | 0.2194 | 0.2841 | 4.6286 | 0.0988 | 19.7914  |
| order.Lactobacillales.id.1800   | Stroke              | Weighted median           | 3 | 1.0186 | 0.8338 | 1.2443 | 0.8569 | 0.4585  | 0.2194 | 0.2841 | 4.6286 | 0.0988 | 19.7914  |
| order.Lactobacillales.id.1800   | Stroke              | Inverse variance weighted | 3 | 0.9690 | 0.7782 | 1.2065 | 0.7782 | 0.4585  | 0.2194 | 0.2841 | 4.6286 | 0.0988 | 19.7914  |
| order.Lactobacillales.id.1800   | Stroke              | Simple mode               | 3 | 1.0586 | 0.7969 | 1.4064 | 0.7321 | 0.4585  | 0.2194 | 0.2841 | 4.6286 | 0.0988 | 19.7914  |
| order.Lactobacillales.id.1800   | Stroke              | Weighted mode             | 3 | 1.0635 | 0.8247 | 1.3715 | 0.6819 | 0.4585  | 0.2194 | 0.2841 | 4.6286 | 0.0988 | 19.7914  |
| order.Methanobacteriales.id.120 | CardioEmbolicStroke | MR Egger                  | 3 | 0.7778 | 0.3269 | 1.8506 | 0.6711 | 0.0403  | 0.0563 | 0.6043 | 0.5282 | 0.7679 | 67.1615  |
| order.Methanobacteriales.id.120 | CardioEmbolicStroke | Weighted median           | 3 | 1.0846 | 0.8744 | 1.3452 | 0.4599 | 0.0403  | 0.0563 | 0.6043 | 0.5282 | 0.7679 | 67.1615  |
| order.Methanobacteriales.id.120 | CardioEmbolicStroke | Inverse variance weighted | 3 | 1.0608 | 0.8900 | 1.2643 | 0.5100 | 0.0403  | 0.0563 | 0.6043 | 0.5282 | 0.7679 | 67.1615  |
| order.Methanobacteriales.id.120 | CardioEmbolicStroke | Simple mode               | 3 | 1.1074 | 0.8568 | 1.4313 | 0.5174 | 0.0403  | 0.0563 | 0.6043 | 0.5282 | 0.7679 | 67.1615  |
| order.Methanobacteriales.id.120 | CardioEmbolicStroke | Weighted mode             | 3 | 1.1074 | 0.8765 | 1.3991 | 0.4826 | 0.0403  | 0.0563 | 0.6043 | 0.5282 | 0.7679 | 67.1615  |
| order.Methanobacteriales.id.120 | IschemicStroke      | MR Egger                  | 3 | 0.8841 | 0.5716 | 1.3672 | 0.6779 | 0.0317  | 0.0280 | 0.4608 | 2.6254 | 0.2691 | 37.8629  |
| order.Methanobacteriales.id.120 | IschemicStroke      | Weighted median           | 3 | 1.1019 | 0.9862 | 1.2312 | 0.0866 | 0.0317  | 0.0280 | 0.4608 | 2.6254 | 0.2691 | 37.8629  |
| order.Methanobacteriales.id.120 | IschemicStroke      | Inverse variance weighted | 3 | 1.1317 | 1.0339 | 1.2387 | 0.0073 | 0.0317  | 0.0280 | 0.4608 | 2.6254 | 0.2691 | 37.8629  |
| order.Methanobacteriales.id.120 | IschemicStroke      | Simple mode               | 3 | 1.0846 | 0.9565 | 1.2299 | 0.3327 | 0.0317  | 0.0280 | 0.4608 | 2.6254 | 0.2691 | 37.8629  |
| order.Methanobacteriales.id.120 | IschemicStroke      | Weighted mode             | 3 | 1.0876 | 0.9637 | 1.2275 | 0.3067 | 0.0317  | 0.0280 | 0.4608 | 2.6254 | 0.2691 | 37.8629  |
| order.Methanobacteriales.id.120 | LargeArteryStroke   | MR Egger                  | 3 | 0.7024 | 0.0789 | 6.2495 | 0.8047 | 0.0425  | 0.1429 | 0.8160 | 3.8602 | 0.0494 | 18.8003  |
| order.Methanobacteriales.id.120 | LargeArteryStroke   | Weighted median           | 3 | 0.9002 | 0.6544 | 1.2384 | 0.5182 | 0.0425  | 0.1429 | 0.8160 | 3.8602 | 0.0494 | 18.8003  |
| order.Methanobacteriales.id.120 | LargeArteryStroke   | Inverse variance weighted | 3 | 0.9716 | 0.6971 | 1.3542 | 0.8649 | 0.0425  | 0.1429 | 0.8160 | 3.8602 | 0.0494 | 18.8003  |
| order.Methanobacteriales.id.120 | LargeArteryStroke   | Simple mode               | 3 | 0.8443 | 0.5633 | 1.2655 | 0.4986 | 0.0425  | 0.1429 | 0.8160 | 3.8602 | 0.0494 | 18.8003  |
| order.Methanobacteriales.id.120 | LargeArteryStroke   | Weighted mode             | 3 | 0.8443 | 0.5686 | 1.2538 | 0.4898 | 0.0425  | 0.1429 | 0.8160 | 3.8602 | 0.0494 | 18.8003  |
| order.Methanobacteriales.id.120 | SmallVesselStroke   | MR Egger                  | 3 | 1.5653 | 0.4303 | 5.6932 | 0.6198 | -0.0505 | 0.0832 | 0.6529 | 1.3394 | 0.2471 | 23.1298  |
| order.Methanobacteriales.id.120 | SmallVesselStroke   | Weighted median           | 3 | 1.1314 | 0.8580 | 1.4919 | 0.3818 | -0.0505 | 0.0832 | 0.6529 | 1.3394 | 0.2471 | 23.1298  |
| order.Methanobacteriales.id.120 | SmallVesselStroke   | Inverse variance weighted | 3 | 1.0579 | 0.8489 | 1.3183 | 0.6164 | -0.0505 | 0.0832 | 0.6529 | 1.3394 | 0.2471 | 23.1298  |
| order.Methanobacteriales.id.120 | SmallVesselStroke   | Simple mode               | 3 | 1.1878 | 0.8442 | 1.6713 | 0.4274 | -0.0505 | 0.0832 | 0.6529 | 1.3394 | 0.2471 | 23.1298  |
| order.Methanobacteriales.id.120 | SmallVesselStroke   | Weighted mode             | 3 | 1.1864 | 0.8139 | 1.7294 | 0.4678 | -0.0505 | 0.0832 | 0.6529 | 1.3394 | 0.2471 | 23.1298  |
| order.Methanobacteriales.id.120 | Stroke              | MR Egger                  | 3 | 0.8113 | 0.5413 | 1.2160 | 0.4960 | 0.0400  | 0.0261 | 0.3687 | 3.9526 | 0.1386 | 44.8865  |
| order.Methanobacteriales.id.120 | Stroke              | Weighted median           | 3 | 1.0823 | 0.9724 | 1.2046 | 0.1479 | 0.0400  | 0.0261 | 0.3687 | 3.9526 | 0.1386 | 44.8865  |
| order.Methanobacteriales.id.120 | Stroke              | Inverse variance weighted | 3 | 1.1057 | 0.9976 | 1.2255 | 0.0555 | 0.0400  | 0.0261 | 0.3687 | 3.9526 | 0.1386 | 44.8865  |
| order.Methanobacteriales.id.120 | Stroke              | Simple mode               | 3 | 1.0712 | 0.9367 | 1.2251 | 0.4206 | 0.0400  | 0.0261 | 0.3687 | 3.9526 | 0.1386 | 44.8865  |
| order.Methanobacteriales.id.120 | Stroke              | Weighted mode             | 3 | 1.0687 | 0.9514 | 1.2005 | 0.3790 | 0.0400  | 0.0261 | 0.3687 | 3.9526 | 0.1386 | 44.8865  |
| order.NBIn.id.3953              | CardioEmbolicStroke | MR Egger                  | 5 | 0.7764 | 0.3933 | 1.5325 | 0.5185 | 0.0372  | 0.0433 | 0.4534 | 1.3142 | 0.8590 | 80.9389  |
| order.NBIn.id.3953              | CardioEmbolicStroke | Weighted median           | 5 | 1.0179 | 0.8216 | 1.2612 | 0.8710 | 0.0372  | 0.0433 | 0.4534 | 1.3142 | 0.8590 | 80.9389  |
| order.NBIn.id.3953              | CardioEmbolicStroke | Inverse variance weighted | 5 | 1.0365 | 0.8771 | 1.2249 | 0.6738 | 0.0372  | 0.0433 | 0.4534 | 1.3142 | 0.8590 | 80.9389  |
| order.NBIn.id.3953              | CardioEmbolicStroke | Simple mode               | 5 | 0.9854 | 0.7524 | 1.2906 | 0.9202 | 0.0372  | 0.0433 | 0.4534 | 1.3142 | 0.8590 | 80.9389  |
| order.NBIn.id.3953              | CardioEmbolicStroke | Weighted mode             | 5 | 0.9867 | 0.7584 | 1.2837 | 0.9253 | 0.0372  | 0.0433 | 0.4534 | 1.3142 | 0.8590 | 80.9389  |
| order.NBIn.id.3953              | IschemicStroke      | MR Egger                  | 5 | 1.0032 | 0.7533 | 1.3360 | 0.9839 | 0.0032  | 0.0187 | 0.8741 | 1.2508 | 0.7408 | 169.2646 |
| order.NBIn.id.3953              | IschemicStroke      | Weighted median           | 5 | 1.0124 | 0.9263 | 1.1064 | 0.7860 | 0.0032  | 0.0187 | 0.8741 | 1.2508 | 0.7408 | 169.2646 |
| order.NBIn.id.3953              | IschemicStroke      | Inverse variance weighted | 5 | 1.0280 | 0.9574 | 1.1038 | 0.4472 | 0.0032  | 0.0187 | 0.8741 | 1.2508 | 0.7408 | 169.2646 |
| order.NBIn.id.3953              | IschemicStroke      | Simple mode               | 5 | 1.0034 | 0.8919 | 1.1289 | 0.9576 | 0.0032  | 0.0187 | 0.8741 | 1.2508 | 0.7408 | 169.2646 |
| order.NBIn.id.3953              | IschemicStroke      | Weighted mode             | 5 | 1.0045 | 0.9004 | 1.1207 | 0.9394 | 0.0032  | 0.0187 | 0.8741 | 1.2508 | 0.7408 | 169.2646 |
| order.NBIn.id.3953              | LargeArteryStroke   | MR Egger                  | 5 | 0.6240 | 0.2401 | 1.6215 | 0.4045 | 0.0661  | 0.0598 | 0.3499 | 1.5151 | 0.8240 | 39.4107  |
| order.NBIn.id.3953              | LargeArteryStroke   | Weighted median           | 5 | 1.0438 | 0.7887 | 1.3816 | 0.7642 | 0.0661  | 0.0598 | 0.3499 | 1.5151 | 0.8240 | 39.4107  |
| order.NBIn.id.3953              | LargeArteryStroke   | Inverse variance weighted | 5 | 1.0520 | 0.8352 | 1.3251 | 0.6667 | 0.0661  | 0.0598 | 0.3499 | 1.5151 | 0.8240 | 39.4107  |
| order.NBIn.id.3953              | LargeArteryStroke   | Simple mode               | 5 | 1.0245 | 0.7030 | 1.4928 | 0.9060 | 0.0661  | 0.0598 | 0.3499 | 1.5151 | 0.8240 | 39.4107  |
| order.NBIn.id.3953              | LargeArteryStroke   | Weighted mode             | 5 | 1.0245 | 0.7051 | 1.4884 | 0.9052 | 0.0661  | 0.0598 | 0.3499 | 1.5151 | 0.8240 | 39.4107  |
| order.NBIn.id.3953              | SmallVesselStroke   | MR Egger                  | 5 | 1.1650 | 0.4884 | 2.7790 | 0.7533 | 0.0170  | 0.0559 | 0.7804 | 2.7377 | 0.4339 | 13.8224  |
| order.NBIn.id.3953              | SmallVesselStroke   | Weighted median           | 5 | 1.2241 | 0.9188 | 1.6309 | 0.1671 | 0.0170  | 0.0559 | 0.7804 | 2.7377 | 0.4339 | 13.8224  |
| order.NBIn.id.3953              | SmallVesselStroke   | Inverse variance weighted | 5 | 1.3282 | 1.0734 | 1.6434 | 0.0090 | 0.0170  | 0.0559 | 0.7804 | 2.7377 | 0.4339 | 13.8224  |
| order.NBIn.id.3953              | SmallVesselStroke   | Simple mode               | 5 | 1.1550 | 0.7892 | 1.6903 | 0.4995 | 0.0170  | 0.0559 | 0.7804 | 2.7377 | 0.4339 | 13.8224  |

|                                |                     |                           |   |        |        |        |        |         |        |        |        |        |          |
|--------------------------------|---------------------|---------------------------|---|--------|--------|--------|--------|---------|--------|--------|--------|--------|----------|
| order.NBIn.id.3953             | SmallVesselStroke   | Weighted mode             | 5 | 1.1550 | 0.8066 | 1.6538 | 0.4755 | 0.0170  | 0.0559 | 0.7804 | 2.7377 | 0.4339 | 13.8224  |
| order.NBIn.id.3953             | Stroke              | MR Egger                  | 5 | 1.0337 | 0.7950 | 1.3440 | 0.8205 | 0.0001  | 0.0171 | 0.9972 | 2.5476 | 0.4667 | 107.5650 |
| order.NBIn.id.3953             | Stroke              | Weighted median           | 5 | 1.0710 | 0.9816 | 1.1685 | 0.1229 | 0.0001  | 0.0171 | 0.9972 | 2.5476 | 0.4667 | 107.5650 |
| order.NBIn.id.3953             | Stroke              | Inverse variance weighted | 5 | 1.0342 | 0.9689 | 1.1040 | 0.3123 | 0.0001  | 0.0171 | 0.9972 | 2.5476 | 0.4667 | 107.5650 |
| order.NBIn.id.3953             | Stroke              | Simple mode               | 5 | 1.0788 | 0.9576 | 1.2153 | 0.2802 | 0.0001  | 0.0171 | 0.9972 | 2.5476 | 0.4667 | 107.5650 |
| order.NBIn.id.3953             | Stroke              | Weighted mode             | 5 | 1.0788 | 0.9580 | 1.2148 | 0.2788 | 0.0001  | 0.0171 | 0.9972 | 2.5476 | 0.4667 | 107.5650 |
| order.Pasteurellales.id.3688   | CardioEmbolicStroke | MR Egger                  | 4 | 1.7775 | 1.0553 | 2.9939 | 0.1631 | -0.0545 | 0.0345 | 0.2551 | 2.6468 | 0.4493 | 15.0777  |
| order.Pasteurellales.id.3688   | CardioEmbolicStroke | Weighted median           | 4 | 1.2249 | 0.9331 | 1.6079 | 0.1439 | -0.0545 | 0.0345 | 0.2551 | 2.6468 | 0.4493 | 15.0777  |
| order.Pasteurellales.id.3688   | CardioEmbolicStroke | Inverse variance weighted | 4 | 1.2067 | 0.9864 | 1.4762 | 0.0677 | -0.0545 | 0.0345 | 0.2551 | 2.6468 | 0.4493 | 15.0777  |
| order.Pasteurellales.id.3688   | CardioEmbolicStroke | Simple mode               | 4 | 1.2371 | 0.8454 | 1.8103 | 0.3534 | -0.0545 | 0.0345 | 0.2551 | 2.6468 | 0.4493 | 15.0777  |
| order.Pasteurellales.id.3688   | CardioEmbolicStroke | Weighted mode             | 4 | 1.3232 | 0.9602 | 1.8235 | 0.1855 | -0.0545 | 0.0345 | 0.2551 | 2.6468 | 0.4493 | 15.0777  |
| order.Pasteurellales.id.3688   | IschemicStroke      | MR Egger                  | 4 | 0.9116 | 0.7298 | 1.1387 | 0.5004 | 0.0118  | 0.0149 | 0.5105 | 0.9936 | 0.8028 | 180.5307 |
| order.Pasteurellales.id.3688   | IschemicStroke      | Weighted median           | 4 | 0.9756 | 0.8753 | 1.0874 | 0.6556 | 0.0118  | 0.0149 | 0.5105 | 0.9936 | 0.8028 | 180.5307 |
| order.Pasteurellales.id.3688   | IschemicStroke      | Inverse variance weighted | 4 | 0.9903 | 0.9074 | 1.0808 | 0.8275 | 0.0118  | 0.0149 | 0.5105 | 0.9936 | 0.8028 | 180.5307 |
| order.Pasteurellales.id.3688   | IschemicStroke      | Simple mode               | 4 | 0.9714 | 0.8498 | 1.1104 | 0.6990 | 0.0118  | 0.0149 | 0.5105 | 0.9936 | 0.8028 | 180.5307 |
| order.Pasteurellales.id.3688   | IschemicStroke      | Weighted mode             | 4 | 0.9709 | 0.8499 | 1.1092 | 0.6932 | 0.0118  | 0.0149 | 0.5105 | 0.9936 | 0.8028 | 180.5307 |
| order.Pasteurellales.id.3688   | LargeArteryStroke   | MR Egger                  | 4 | 0.7399 | 0.2958 | 1.8510 | 0.5856 | 0.0528  | 0.0605 | 0.4750 | 3.3871 | 0.1839 | 12.2083  |
| order.Pasteurellales.id.3688   | LargeArteryStroke   | Weighted median           | 4 | 1.0224 | 0.7175 | 1.4569 | 0.9025 | 0.0528  | 0.0605 | 0.4750 | 3.3871 | 0.1839 | 12.2083  |
| order.Pasteurellales.id.3688   | LargeArteryStroke   | Inverse variance weighted | 4 | 1.0774 | 0.7646 | 1.5183 | 0.6700 | 0.0528  | 0.0605 | 0.4750 | 3.3871 | 0.1839 | 12.2083  |
| order.Pasteurellales.id.3688   | LargeArteryStroke   | Simple mode               | 4 | 1.0444 | 0.5942 | 1.8356 | 0.8895 | 0.0528  | 0.0605 | 0.4750 | 3.3871 | 0.1839 | 12.2083  |
| order.Pasteurellales.id.3688   | LargeArteryStroke   | Weighted mode             | 4 | 0.9167 | 0.6347 | 1.3240 | 0.6745 | 0.0528  | 0.0605 | 0.4750 | 3.3871 | 0.1839 | 12.2083  |
| order.Pasteurellales.id.3688   | SmallVesselStroke   | MR Egger                  | 4 | 1.2247 | 0.6314 | 2.3758 | 0.6096 | -0.0061 | 0.0436 | 0.9019 | 0.7548 | 0.6856 | 24.8171  |
| order.Pasteurellales.id.3688   | SmallVesselStroke   | Weighted median           | 4 | 1.2288 | 0.8997 | 1.6784 | 0.1952 | -0.0061 | 0.0436 | 0.9019 | 0.7548 | 0.6856 | 24.8171  |
| order.Pasteurellales.id.3688   | SmallVesselStroke   | Inverse variance weighted | 4 | 1.1726 | 0.9072 | 1.5157 | 0.2238 | -0.0061 | 0.0436 | 0.9019 | 0.7548 | 0.6856 | 24.8171  |
| order.Pasteurellales.id.3688   | SmallVesselStroke   | Simple mode               | 4 | 1.2491 | 0.8669 | 1.7998 | 0.3185 | -0.0061 | 0.0436 | 0.9019 | 0.7548 | 0.6856 | 24.8171  |
| order.Pasteurellales.id.3688   | SmallVesselStroke   | Weighted mode             | 4 | 1.2537 | 0.8744 | 1.7976 | 0.3064 | -0.0061 | 0.0436 | 0.9019 | 0.7548 | 0.6856 | 24.8171  |
| order.Pasteurellales.id.3688   | Stroke              | MR Egger                  | 4 | 1.0036 | 0.8174 | 1.2321 | 0.9759 | -0.0034 | 0.0137 | 0.8283 | 0.0272 | 0.9865 | 346.4280 |
| order.Pasteurellales.id.3688   | Stroke              | Weighted median           | 4 | 0.9760 | 0.8839 | 1.0776 | 0.6305 | -0.0034 | 0.0137 | 0.8283 | 0.0272 | 0.9865 | 346.4280 |
| order.Pasteurellales.id.3688   | Stroke              | Inverse variance weighted | 4 | 0.9801 | 0.9041 | 1.0624 | 0.6246 | -0.0034 | 0.0137 | 0.8283 | 0.0272 | 0.9865 | 346.4280 |
| order.Pasteurellales.id.3688   | Stroke              | Simple mode               | 4 | 0.9706 | 0.8638 | 1.0906 | 0.6505 | -0.0034 | 0.0137 | 0.8283 | 0.0272 | 0.9865 | 346.4280 |
| order.Pasteurellales.id.3688   | Stroke              | Weighted mode             | 4 | 0.9930 | 0.8948 | 1.1019 | 0.9026 | -0.0034 | 0.0137 | 0.8283 | 0.0272 | 0.9865 | 346.4280 |
| order.Rhodospirillales.id.2667 | CardioEmbolicStroke | Inverse variance weighted | 2 | 0.9913 | 0.7131 | 1.3780 | 0.9584 | NA      | NA     | NA     | 0.5738 | 0.4487 | 23.8225  |
| order.Rhodospirillales.id.2667 | IschemicStroke      | Inverse variance weighted | 2 | 0.9754 | 0.8460 | 1.1246 | 0.7316 | NA      | NA     | NA     | 0.5338 | 0.4650 | 52.6163  |
| order.Rhodospirillales.id.2667 | LargeArteryStroke   | Inverse variance weighted | 2 | 0.8511 | 0.5499 | 1.3174 | 0.4696 | NA      | NA     | NA     | 0.8742 | 0.3498 | 8.2994   |
| order.Rhodospirillales.id.2667 | SmallVesselStroke   | Inverse variance weighted | 2 | 1.3374 | 0.8871 | 2.0163 | 0.1652 | NA      | NA     | NA     | 0.0080 | 0.9288 | 8.0004   |
| order.Rhodospirillales.id.2667 | Stroke              | Inverse variance weighted | 2 | 0.9986 | 0.8759 | 1.1385 | 0.9829 | NA      | NA     | NA     | 0.0078 | 0.9295 | 582.9317 |
| order.Selenomonadales.id.2165  | CardioEmbolicStroke | Inverse variance weighted | 2 | 0.8361 | 0.2518 | 2.7769 | 0.7701 | NA      | NA     | NA     | 6.6083 | 0.0102 | 3.7744   |
| order.Selenomonadales.id.2165  | IschemicStroke      | Inverse variance weighted | 2 | 0.8851 | 0.5198 | 1.5073 | 0.6532 | NA      | NA     | NA     | 7.3599 | 0.0067 | 13.0342  |
| order.Selenomonadales.id.2165  | LargeArteryStroke   | Inverse variance weighted | 2 | 0.4603 | 0.2477 | 0.8556 | 0.0142 | NA      | NA     | NA     | 0.2611 | 0.6093 | 1.2842   |
| order.Selenomonadales.id.2165  | SmallVesselStroke   | Inverse variance weighted | 2 | 0.8355 | 0.4191 | 1.6659 | 0.6098 | NA      | NA     | NA     | 1.3770 | 0.2406 | 9.3744   |
| order.Selenomonadales.id.2165  | Stroke              | Inverse variance weighted | 2 | 0.9044 | 0.5397 | 1.5154 | 0.7028 | NA      | NA     | NA     | 8.1287 | 0.0044 | 13.2528  |
| order.Victivallales.id.2254    | CardioEmbolicStroke | MR Egger                  | 3 | 0.7191 | 0.2112 | 2.4484 | 0.6910 | 0.0318  | 0.0835 | 0.7682 | 2.5165 | 0.1127 | 25.0237  |
| order.Victivallales.id.2254    | CardioEmbolicStroke | Weighted median           | 3 | 0.9455 | 0.7161 | 1.2484 | 0.6925 | 0.0318  | 0.0835 | 0.7682 | 2.5165 | 0.1127 | 25.0237  |
| order.Victivallales.id.2254    | CardioEmbolicStroke | Inverse variance weighted | 3 | 0.9046 | 0.7051 | 1.1605 | 0.4301 | 0.0318  | 0.0835 | 0.7682 | 2.5165 | 0.1127 | 25.0237  |
| order.Victivallales.id.2254    | CardioEmbolicStroke | Simple mode               | 3 | 0.9784 | 0.6768 | 1.4144 | 0.9183 | 0.0318  | 0.0835 | 0.7682 | 2.5165 | 0.1127 | 25.0237  |
| order.Victivallales.id.2254    | CardioEmbolicStroke | Weighted mode             | 3 | 0.9917 | 0.6989 | 1.4072 | 0.9671 | 0.0318  | 0.0835 | 0.7682 | 2.5165 | 0.1127 | 25.0237  |
| order.Victivallales.id.2254    | IschemicStroke      | MR Egger                  | 3 | 0.8805 | 0.6333 | 1.2243 | 0.5877 | 0.0020  | 0.0228 | 0.9430 | 0.0009 | 0.9757 | 44.1998  |
| order.Victivallales.id.2254    | IschemicStroke      | Weighted median           | 3 | 0.8920 | 0.7991 | 0.9957 | 0.0416 | 0.0020  | 0.0228 | 0.9430 | 0.0009 | 0.9757 | 44.1998  |
| order.Victivallales.id.2254    | IschemicStroke      | Inverse variance weighted | 3 | 0.8934 | 0.8172 | 0.9768 | 0.0133 | 0.0020  | 0.0228 | 0.9430 | 0.0009 | 0.9757 | 44.1998  |
| order.Victivallales.id.2254    | IschemicStroke      | Simple mode               | 3 | 0.8909 | 0.7886 | 1.0064 | 0.2044 | 0.0020  | 0.0228 | 0.9430 | 0.0009 | 0.9757 | 44.1998  |
| order.Victivallales.id.2254    | IschemicStroke      | Weighted mode             | 3 | 0.8909 | 0.7895 | 1.0053 | 0.2018 | 0.0020  | 0.0228 | 0.9430 | 0.0009 | 0.9757 | 44.1998  |
| order.Victivallales.id.2254    | LargeArteryStroke   | Inverse variance weighted | 2 | 1.1046 | 0.7876 | 1.5491 | 0.5644 | NA      | NA     | NA     | 0.0020 | 0.9646 | 34.4299  |
| order.Victivallales.id.2254    | SmallVesselStroke   | MR Egger                  | 3 | 1.1919 | 0.3321 | 4.2776 | 0.8326 | -0.0439 | 0.0865 | 0.7009 | 1.7063 | 0.1915 | 23.6678  |
| order.Victivallales.id.2254    | SmallVesselStroke   | Weighted median           | 3 | 0.8648 | 0.6112 | 1.2235 | 0.4119 | -0.0439 | 0.0865 | 0.7009 | 1.7063 | 0.1915 | 23.6678  |

|                              |                     |                           |   |        |        |         |        |         |        |        |        |        |         |
|------------------------------|---------------------|---------------------------|---|--------|--------|---------|--------|---------|--------|--------|--------|--------|---------|
| order.Victivallales.id.2254  | SmallVesselStroke   | Inverse variance weighted | 3 | 0.8663 | 0.6611 | 1.1353  | 0.2983 | -0.0439 | 0.0865 | 0.7009 | 1.7063 | 0.1915 | 23.6678 |
| order.Victivallales.id.2254  | SmallVesselStroke   | Simple mode               | 3 | 0.8348 | 0.5495 | 1.2681  | 0.4863 | -0.0439 | 0.0865 | 0.7009 | 1.7063 | 0.1915 | 23.6678 |
| order.Victivallales.id.2254  | SmallVesselStroke   | Weighted mode             | 3 | 0.8323 | 0.5477 | 1.2649  | 0.4807 | -0.0439 | 0.0865 | 0.7009 | 1.7063 | 0.1915 | 23.6678 |
| order.Victivallales.id.2254  | Stroke              | MR Egger                  | 3 | 0.9466 | 0.7008 | 1.2787  | 0.7814 | -0.0033 | 0.0209 | 0.9012 | 0.0149 | 0.9029 | 74.4347 |
| order.Victivallales.id.2254  | Stroke              | Weighted median           | 3 | 0.9218 | 0.8340 | 1.0188  | 0.1106 | -0.0033 | 0.0209 | 0.9012 | 0.0149 | 0.9029 | 74.4347 |
| order.Victivallales.id.2254  | Stroke              | Inverse variance weighted | 3 | 0.9250 | 0.8519 | 1.0044  | 0.0635 | -0.0033 | 0.0209 | 0.9012 | 0.0149 | 0.9029 | 74.4347 |
| order.Victivallales.id.2254  | Stroke              | Simple mode               | 3 | 0.9195 | 0.8247 | 1.0252  | 0.2699 | -0.0033 | 0.0209 | 0.9012 | 0.0149 | 0.9029 | 74.4347 |
| order.Victivallales.id.2254  | Stroke              | Weighted mode             | 3 | 0.9195 | 0.8243 | 1.0257  | 0.2711 | -0.0033 | 0.0209 | 0.9012 | 0.0149 | 0.9029 | 74.4347 |
| phylum.Actinobacteria.id.400 | CardioEmbolicStroke | MR Egger                  | 6 | 0.8677 | 0.2982 | 2.5247  | 0.8074 | 0.0155  | 0.0318 | 0.6516 | 2.1961 | 0.6997 | 14.0821 |
| phylum.Actinobacteria.id.400 | CardioEmbolicStroke | Weighted median           | 6 | 1.0458 | 0.7470 | 1.4642  | 0.7942 | 0.0155  | 0.0318 | 0.6516 | 2.1961 | 0.6997 | 14.0821 |
| phylum.Actinobacteria.id.400 | CardioEmbolicStroke | Inverse variance weighted | 6 | 1.1223 | 0.8621 | 1.4609  | 0.3912 | 0.0155  | 0.0318 | 0.6516 | 2.1961 | 0.6997 | 14.0821 |
| phylum.Actinobacteria.id.400 | CardioEmbolicStroke | Simple mode               | 6 | 0.9680 | 0.6222 | 1.5060  | 0.8909 | 0.0155  | 0.0318 | 0.6516 | 2.1961 | 0.6997 | 14.0821 |
| phylum.Actinobacteria.id.400 | CardioEmbolicStroke | Weighted mode             | 6 | 0.9837 | 0.6325 | 1.5298  | 0.9446 | 0.0155  | 0.0318 | 0.6516 | 2.1961 | 0.6997 | 14.0821 |
| phylum.Actinobacteria.id.400 | IschemicStroke      | MR Egger                  | 7 | 0.9246 | 0.6547 | 1.3056  | 0.6746 | 0.0070  | 0.0108 | 0.5494 | 3.8470 | 0.5716 | 52.4376 |
| phylum.Actinobacteria.id.400 | IschemicStroke      | Weighted median           | 7 | 0.9975 | 0.8639 | 1.1519  | 0.9732 | 0.0070  | 0.0108 | 0.5494 | 3.8470 | 0.5716 | 52.4376 |
| phylum.Actinobacteria.id.400 | IschemicStroke      | Inverse variance weighted | 7 | 1.0294 | 0.9248 | 1.1457  | 0.5963 | 0.0070  | 0.0108 | 0.5494 | 3.8470 | 0.5716 | 52.4376 |
| phylum.Actinobacteria.id.400 | IschemicStroke      | Simple mode               | 7 | 0.9907 | 0.8234 | 1.1920  | 0.9243 | 0.0070  | 0.0108 | 0.5494 | 3.8470 | 0.5716 | 52.4376 |
| phylum.Actinobacteria.id.400 | IschemicStroke      | Weighted mode             | 7 | 1.0040 | 0.8472 | 1.1897  | 0.9650 | 0.0070  | 0.0108 | 0.5494 | 3.8470 | 0.5716 | 52.4376 |
| phylum.Actinobacteria.id.400 | LargeArteryStroke   | MR Egger                  | 6 | 0.7390 | 0.1800 | 3.0344  | 0.6963 | 0.0081  | 0.0420 | 0.8569 | 3.2814 | 0.5119 | 5.8420  |
| phylum.Actinobacteria.id.400 | LargeArteryStroke   | Weighted median           | 6 | 0.7903 | 0.5155 | 1.2118  | 0.2806 | 0.0081  | 0.0420 | 0.8569 | 3.2814 | 0.5119 | 5.8420  |
| phylum.Actinobacteria.id.400 | LargeArteryStroke   | Inverse variance weighted | 6 | 0.8452 | 0.5956 | 1.1994  | 0.3462 | 0.0081  | 0.0420 | 0.8569 | 3.2814 | 0.5119 | 5.8420  |
| phylum.Actinobacteria.id.400 | LargeArteryStroke   | Simple mode               | 6 | 0.7017 | 0.3367 | 1.4625  | 0.3878 | 0.0081  | 0.0420 | 0.8569 | 3.2814 | 0.5119 | 5.8420  |
| phylum.Actinobacteria.id.400 | LargeArteryStroke   | Weighted mode             | 6 | 0.6816 | 0.3317 | 1.4009  | 0.3448 | 0.0081  | 0.0420 | 0.8569 | 3.2814 | 0.5119 | 5.8420  |
| phylum.Actinobacteria.id.400 | SmallVesselStroke   | MR Egger                  | 6 | 0.4978 | 0.1326 | 1.8679  | 0.3596 | 0.0445  | 0.0395 | 0.3225 | 4.3310 | 0.5028 | 7.9554  |
| phylum.Actinobacteria.id.400 | SmallVesselStroke   | Weighted median           | 6 | 0.9253 | 0.5973 | 1.4334  | 0.7281 | 0.0445  | 0.0395 | 0.3225 | 4.3310 | 0.5028 | 7.9554  |
| phylum.Actinobacteria.id.400 | SmallVesselStroke   | Inverse variance weighted | 6 | 1.0401 | 0.7488 | 1.4449  | 0.8145 | 0.0445  | 0.0395 | 0.3225 | 4.3310 | 0.5028 | 7.9554  |
| phylum.Actinobacteria.id.400 | SmallVesselStroke   | Simple mode               | 6 | 0.8559 | 0.4687 | 1.5628  | 0.6340 | 0.0445  | 0.0395 | 0.3225 | 4.3310 | 0.5028 | 7.9554  |
| phylum.Actinobacteria.id.400 | SmallVesselStroke   | Weighted mode             | 6 | 0.8599 | 0.5087 | 1.4533  | 0.5972 | 0.0445  | 0.0395 | 0.3225 | 4.3310 | 0.5028 | 7.9554  |
| phylum.Actinobacteria.id.400 | Stroke              | MR Egger                  | 7 | 0.8776 | 0.6408 | 1.2020  | 0.4530 | 0.0090  | 0.0099 | 0.4037 | 3.9115 | 0.5622 | 53.9077 |
| phylum.Actinobacteria.id.400 | Stroke              | Weighted median           | 7 | 0.9691 | 0.8513 | 1.1031  | 0.6345 | 0.0090  | 0.0099 | 0.4037 | 3.9115 | 0.5622 | 53.9077 |
| phylum.Actinobacteria.id.400 | Stroke              | Inverse variance weighted | 7 | 1.0084 | 0.9137 | 1.1130  | 0.8674 | 0.0090  | 0.0099 | 0.4037 | 3.9115 | 0.5622 | 53.9077 |
| phylum.Actinobacteria.id.400 | Stroke              | Simple mode               | 7 | 0.9669 | 0.8206 | 1.1393  | 0.7013 | 0.0090  | 0.0099 | 0.4037 | 3.9115 | 0.5622 | 53.9077 |
| phylum.Actinobacteria.id.400 | Stroke              | Weighted mode             | 7 | 0.9669 | 0.8254 | 1.1327  | 0.6911 | 0.0090  | 0.0099 | 0.4037 | 3.9115 | 0.5622 | 53.9077 |
| phylum.Bacteroidetes.id.905  | CardioEmbolicStroke | MR Egger                  | 3 | 1.5756 | 0.5900 | 4.2074  | 0.5310 | -0.0343 | 0.0352 | 0.5079 | 1.2939 | 0.5236 | 12.1221 |
| phylum.Bacteroidetes.id.905  | CardioEmbolicStroke | Weighted median           | 3 | 0.9640 | 0.6210 | 1.4966  | 0.8703 | -0.0343 | 0.0352 | 0.5079 | 1.2939 | 0.5236 | 12.1221 |
| phylum.Bacteroidetes.id.905  | CardioEmbolicStroke | Inverse variance weighted | 3 | 0.9992 | 0.6994 | 1.4274  | 0.9964 | -0.0343 | 0.0352 | 0.5079 | 1.2939 | 0.5236 | 12.1221 |
| phylum.Bacteroidetes.id.905  | CardioEmbolicStroke | Simple mode               | 3 | 0.8912 | 0.5182 | 1.5326  | 0.7175 | -0.0343 | 0.0352 | 0.5079 | 1.2939 | 0.5236 | 12.1221 |
| phylum.Bacteroidetes.id.905  | CardioEmbolicStroke | Weighted mode             | 3 | 0.8939 | 0.5159 | 1.5488  | 0.7278 | -0.0343 | 0.0352 | 0.5079 | 1.2939 | 0.5236 | 12.1221 |
| phylum.Bacteroidetes.id.905  | IschemicStroke      | MR Egger                  | 3 | 1.2863 | 0.6793 | 2.4355  | 0.5811 | -0.0050 | 0.0233 | 0.8662 | 2.3539 | 0.1250 | 11.8969 |
| phylum.Bacteroidetes.id.905  | IschemicStroke      | Weighted median           | 3 | 1.2364 | 0.9975 | 1.5326  | 0.0528 | -0.0050 | 0.0233 | 0.8662 | 2.3539 | 0.1250 | 11.8969 |
| phylum.Bacteroidetes.id.905  | IschemicStroke      | Inverse variance weighted | 3 | 1.2060 | 1.0148 | 1.4332  | 0.0334 | -0.0050 | 0.0233 | 0.8662 | 2.3539 | 0.1250 | 11.8969 |
| phylum.Bacteroidetes.id.905  | IschemicStroke      | Simple mode               | 3 | 1.3183 | 0.9987 | 1.7403  | 0.1904 | -0.0050 | 0.0233 | 0.8662 | 2.3539 | 0.1250 | 11.8969 |
| phylum.Bacteroidetes.id.905  | IschemicStroke      | Weighted mode             | 3 | 1.3074 | 0.9864 | 1.7329  | 0.2032 | -0.0050 | 0.0233 | 0.8662 | 2.3539 | 0.1250 | 11.8969 |
| phylum.Bacteroidetes.id.905  | LargeArteryStroke   | MR Egger                  | 3 | 2.7427 | 0.4120 | 18.2574 | 0.4865 | -0.0738 | 0.0676 | 0.4724 | 4.4675 | 0.1071 | 4.6131  |
| phylum.Bacteroidetes.id.905  | LargeArteryStroke   | Weighted median           | 3 | 1.3718 | 0.7201 | 2.6134  | 0.3364 | -0.0738 | 0.0676 | 0.4724 | 4.4675 | 0.1071 | 4.6131  |
| phylum.Bacteroidetes.id.905  | LargeArteryStroke   | Inverse variance weighted | 3 | 1.0259 | 0.5003 | 2.1034  | 0.9444 | -0.0738 | 0.0676 | 0.4724 | 4.4675 | 0.1071 | 4.6131  |
| phylum.Bacteroidetes.id.905  | LargeArteryStroke   | Simple mode               | 3 | 1.4245 | 0.6162 | 3.2933  | 0.4950 | -0.0738 | 0.0676 | 0.4724 | 4.4675 | 0.1071 | 4.6131  |
| phylum.Bacteroidetes.id.905  | LargeArteryStroke   | Weighted mode             | 3 | 1.4352 | 0.6855 | 3.0049  | 0.4390 | -0.0738 | 0.0676 | 0.4724 | 4.4675 | 0.1071 | 4.6131  |
| phylum.Bacteroidetes.id.905  | SmallVesselStroke   | MR Egger                  | 3 | 1.8966 | 0.4422 | 8.1352  | 0.5473 | -0.0461 | 0.0517 | 0.5365 | 1.3443 | 0.2463 | 5.9287  |
| phylum.Bacteroidetes.id.905  | SmallVesselStroke   | Weighted median           | 3 | 1.1087 | 0.6140 | 2.0021  | 0.7322 | -0.0461 | 0.0517 | 0.5365 | 1.3443 | 0.2463 | 5.9287  |
| phylum.Bacteroidetes.id.905  | SmallVesselStroke   | Inverse variance weighted | 3 | 1.0219 | 0.6239 | 1.6738  | 0.9314 | -0.0461 | 0.0517 | 0.5365 | 1.3443 | 0.2463 | 5.9287  |
| phylum.Bacteroidetes.id.905  | SmallVesselStroke   | Simple mode               | 3 | 1.1973 | 0.5623 | 2.5497  | 0.6864 | -0.0461 | 0.0517 | 0.5365 | 1.3443 | 0.2463 | 5.9287  |
| phylum.Bacteroidetes.id.905  | SmallVesselStroke   | Weighted mode             | 3 | 1.2294 | 0.5861 | 2.5785  | 0.6396 | -0.0461 | 0.0517 | 0.5365 | 1.3443 | 0.2463 | 5.9287  |
| phylum.Bacteroidetes.id.905  | Stroke              | MR Egger                  | 3 | 1.1046 | 0.6999 | 1.7432  | 0.7429 | 0.0009  | 0.0167 | 0.9651 | 1.4174 | 0.2338 | 25.1534 |

|                                 |                     |                           |   |        |        |         |        |         |        |        |        |        |         |
|---------------------------------|---------------------|---------------------------|---|--------|--------|---------|--------|---------|--------|--------|--------|--------|---------|
| phylum. Bacteroidetes. id. 905  | Stroke              | Weighted median           | 3 | 1.1186 | 0.9295 | 1.3463  | 0.2354 | 0.0009  | 0.0167 | 0.9651 | 1.4174 | 0.2338 | 25.1534 |
| phylum. Bacteroidetes. id. 905  | Stroke              | Inverse variance weighted | 3 | 1.1178 | 0.9688 | 1.2897  | 0.1272 | 0.0009  | 0.0167 | 0.9651 | 1.4174 | 0.2338 | 25.1534 |
| phylum. Bacteroidetes. id. 905  | Stroke              | Simple mode               | 3 | 1.1598 | 0.9362 | 1.4368  | 0.3078 | 0.0009  | 0.0167 | 0.9651 | 1.4174 | 0.2338 | 25.1534 |
| phylum. Bacteroidetes. id. 905  | Stroke              | Weighted mode             | 3 | 1.1324 | 0.9036 | 1.4192  | 0.3931 | 0.0009  | 0.0167 | 0.9651 | 1.4174 | 0.2338 | 25.1534 |
| phylum. Cyanobacteria. id. 1500 | CardioEmbolicStroke | MR Egger                  | 4 | 1.6102 | 0.4449 | 5.8279  | 0.5434 | -0.0716 | 0.0740 | 0.4352 | 1.9333 | 0.5864 | 19.3289 |
| phylum. Cyanobacteria. id. 1500 | CardioEmbolicStroke | Weighted median           | 4 | 0.8309 | 0.6458 | 1.0692  | 0.1498 | -0.0716 | 0.0740 | 0.4352 | 1.9333 | 0.5864 | 19.3289 |
| phylum. Cyanobacteria. id. 1500 | CardioEmbolicStroke | Inverse variance weighted | 4 | 0.8606 | 0.6960 | 1.0643  | 0.1660 | -0.0716 | 0.0740 | 0.4352 | 1.9333 | 0.5864 | 19.3289 |
| phylum. Cyanobacteria. id. 1500 | CardioEmbolicStroke | Simple mode               | 4 | 0.8130 | 0.5683 | 1.1630  | 0.3394 | -0.0716 | 0.0740 | 0.4352 | 1.9333 | 0.5864 | 19.3289 |
| phylum. Cyanobacteria. id. 1500 | CardioEmbolicStroke | Weighted mode             | 4 | 0.8157 | 0.5730 | 1.1613  | 0.3406 | -0.0716 | 0.0740 | 0.4352 | 1.9333 | 0.5864 | 19.3289 |
| phylum. Cyanobacteria. id. 1500 | IschemicStroke      | MR Egger                  | 4 | 1.5323 | 0.8636 | 2.7189  | 0.2820 | -0.0581 | 0.0331 | 0.2209 | 3.6695 | 0.2994 | 45.2151 |
| phylum. Cyanobacteria. id. 1500 | IschemicStroke      | Weighted median           | 4 | 0.9495 | 0.8455 | 1.0661  | 0.3804 | -0.0581 | 0.0331 | 0.2209 | 3.6695 | 0.2994 | 45.2151 |
| phylum. Cyanobacteria. id. 1500 | IschemicStroke      | Inverse variance weighted | 4 | 0.9225 | 0.8326 | 1.0220  | 0.1227 | -0.0581 | 0.0331 | 0.2209 | 3.6695 | 0.2994 | 45.2151 |
| phylum. Cyanobacteria. id. 1500 | IschemicStroke      | Simple mode               | 4 | 0.9889 | 0.8217 | 1.1903  | 0.9138 | -0.0581 | 0.0331 | 0.2209 | 3.6695 | 0.2994 | 45.2151 |
| phylum. Cyanobacteria. id. 1500 | IschemicStroke      | Weighted mode             | 4 | 0.9889 | 0.8437 | 1.1592  | 0.8996 | -0.0581 | 0.0331 | 0.2209 | 3.6695 | 0.2994 | 45.2151 |
| phylum. Cyanobacteria. id. 1500 | LargeArteryStroke   | MR Egger                  | 4 | 2.3933 | 0.3397 | 16.8630 | 0.4734 | -0.1111 | 0.1124 | 0.4272 | 4.0820 | 0.2527 | 9.5564  |
| phylum. Cyanobacteria. id. 1500 | LargeArteryStroke   | Weighted median           | 4 | 0.8621 | 0.6201 | 1.1986  | 0.3775 | -0.1111 | 0.1124 | 0.4272 | 4.0820 | 0.2527 | 9.5564  |
| phylum. Cyanobacteria. id. 1500 | LargeArteryStroke   | Inverse variance weighted | 4 | 0.9065 | 0.6563 | 1.2520  | 0.5512 | -0.1111 | 0.1124 | 0.4272 | 4.0820 | 0.2527 | 9.5564  |
| phylum. Cyanobacteria. id. 1500 | LargeArteryStroke   | Simple mode               | 4 | 0.7984 | 0.4683 | 1.3612  | 0.4688 | -0.1111 | 0.1124 | 0.4272 | 4.0820 | 0.2527 | 9.5564  |
| phylum. Cyanobacteria. id. 1500 | LargeArteryStroke   | Weighted mode             | 4 | 0.8043 | 0.4876 | 1.3265  | 0.4563 | -0.1111 | 0.1124 | 0.4272 | 4.0820 | 0.2527 | 9.5564  |
| phylum. Cyanobacteria. id. 1500 | SmallVesselStroke   | MR Egger                  | 4 | 1.1822 | 0.2391 | 5.8442  | 0.8563 | -0.0116 | 0.0916 | 0.9107 | 1.1628 | 0.5591 | 26.4827 |
| phylum. Cyanobacteria. id. 1500 | SmallVesselStroke   | Weighted median           | 4 | 1.0600 | 0.7782 | 1.4438  | 0.7118 | -0.0116 | 0.0916 | 0.9107 | 1.1628 | 0.5591 | 26.4827 |
| phylum. Cyanobacteria. id. 1500 | SmallVesselStroke   | Inverse variance weighted | 4 | 1.0676 | 0.8207 | 1.3888  | 0.6260 | -0.0116 | 0.0916 | 0.9107 | 1.1628 | 0.5591 | 26.4827 |
| phylum. Cyanobacteria. id. 1500 | SmallVesselStroke   | Simple mode               | 4 | 1.0496 | 0.6790 | 1.6224  | 0.8416 | -0.0116 | 0.0916 | 0.9107 | 1.1628 | 0.5591 | 26.4827 |
| phylum. Cyanobacteria. id. 1500 | SmallVesselStroke   | Weighted mode             | 4 | 1.0496 | 0.6863 | 1.6051  | 0.8377 | -0.0116 | 0.0916 | 0.9107 | 1.1628 | 0.5591 | 26.4827 |
| phylum. Cyanobacteria. id. 1500 | Stroke              | MR Egger                  | 4 | 1.7927 | 1.0572 | 3.0399  | 0.1626 | -0.0746 | 0.0304 | 0.1339 | 6.0537 | 0.1090 | 40.9749 |
| phylum. Cyanobacteria. id. 1500 | Stroke              | Weighted median           | 4 | 0.9518 | 0.8544 | 1.0603  | 0.3699 | -0.0746 | 0.0304 | 0.1339 | 6.0537 | 0.1090 | 40.9749 |
| phylum. Cyanobacteria. id. 1500 | Stroke              | Inverse variance weighted | 4 | 0.9344 | 0.8275 | 1.0550  | 0.2731 | -0.0746 | 0.0304 | 0.1339 | 6.0537 | 0.1090 | 40.9749 |
| phylum. Cyanobacteria. id. 1500 | Stroke              | Simple mode               | 4 | 0.9672 | 0.8059 | 1.1607  | 0.7435 | -0.0746 | 0.0304 | 0.1339 | 6.0537 | 0.1090 | 40.9749 |
| phylum. Cyanobacteria. id. 1500 | Stroke              | Weighted mode             | 4 | 0.9687 | 0.8290 | 1.1321  | 0.7162 | -0.0746 | 0.0304 | 0.1339 | 6.0537 | 0.1090 | 40.9749 |
| phylum. Euryarchaeota. id. 55   | CardioEmbolicStroke | Inverse variance weighted | 2 | 1.1139 | 0.8912 | 1.3923  | 0.3432 | NA      | NA     | NA     | 0.0543 | 0.8158 | 29.2511 |
| phylum. Euryarchaeota. id. 55   | IschemicStroke      | Inverse variance weighted | 2 | 1.0538 | 0.9372 | 1.1848  | 0.3809 | NA      | NA     | NA     | 1.4930 | 0.2218 | 43.9949 |
| phylum. Euryarchaeota. id. 55   | LargeArteryStroke   | Inverse variance weighted | 2 | 0.7346 | 0.5493 | 0.9826  | 0.0377 | NA      | NA     | NA     | 0.0772 | 0.7811 | 7.7799  |
| phylum. Euryarchaeota. id. 55   | SmallVesselStroke   | Inverse variance weighted | 2 | 0.9443 | 0.7137 | 1.2493  | 0.6880 | NA      | NA     | NA     | 0.5083 | 0.4759 | 28.0990 |
| phylum. Euryarchaeota. id. 55   | Stroke              | Inverse variance weighted | 2 | 1.0646 | 0.9739 | 1.1638  | 0.1683 | NA      | NA     | NA     | 0.5384 | 0.4631 | 49.7407 |
| phylum. Firmicutes. id. 1672    | CardioEmbolicStroke | MR Egger                  | 3 | 3.1375 | 1.3304 | 7.3991  | 0.2328 | -0.0856 | 0.0327 | 0.2324 | 6.8728 | 0.0322 | 3.6868  |
| phylum. Firmicutes. id. 1672    | CardioEmbolicStroke | Weighted median           | 3 | 1.2607 | 0.7286 | 2.1814  | 0.4076 | -0.0856 | 0.0327 | 0.2324 | 6.8728 | 0.0322 | 3.6868  |
| phylum. Firmicutes. id. 1672    | CardioEmbolicStroke | Inverse variance weighted | 3 | 1.1190 | 0.5596 | 2.2375  | 0.7505 | -0.0856 | 0.0327 | 0.2324 | 6.8728 | 0.0322 | 3.6868  |
| phylum. Firmicutes. id. 1672    | CardioEmbolicStroke | Simple mode               | 3 | 1.3442 | 0.6277 | 2.8784  | 0.5260 | -0.0856 | 0.0327 | 0.2324 | 6.8728 | 0.0322 | 3.6868  |
| phylum. Firmicutes. id. 1672    | CardioEmbolicStroke | Weighted mode             | 3 | 1.4072 | 0.7355 | 2.6922  | 0.4105 | -0.0856 | 0.0327 | 0.2324 | 6.8728 | 0.0322 | 3.6868  |
| phylum. Firmicutes. id. 1672    | IschemicStroke      | MR Egger                  | 3 | 0.9699 | 0.6803 | 1.3826  | 0.8933 | -0.0047 | 0.0137 | 0.7882 | 0.1312 | 0.7172 | 49.8549 |
| phylum. Firmicutes. id. 1672    | IschemicStroke      | Weighted median           | 3 | 0.9120 | 0.7585 | 1.0965  | 0.3269 | -0.0047 | 0.0137 | 0.7882 | 0.1312 | 0.7172 | 49.8549 |
| phylum. Firmicutes. id. 1672    | IschemicStroke      | Inverse variance weighted | 3 | 0.9172 | 0.7822 | 1.0754  | 0.2870 | -0.0047 | 0.0137 | 0.7882 | 0.1312 | 0.7172 | 49.8549 |
| phylum. Firmicutes. id. 1672    | IschemicStroke      | Simple mode               | 3 | 0.8852 | 0.7102 | 1.1033  | 0.3912 | -0.0047 | 0.0137 | 0.7882 | 0.1312 | 0.7172 | 49.8549 |
| phylum. Firmicutes. id. 1672    | IschemicStroke      | Weighted mode             | 3 | 0.8861 | 0.7147 | 1.0985  | 0.3850 | -0.0047 | 0.0137 | 0.7882 | 0.1312 | 0.7172 | 49.8549 |
| phylum. Firmicutes. id. 1672    | LargeArteryStroke   | Inverse variance weighted | 2 | 0.7735 | 0.2590 | 2.3102  | 0.6454 | NA      | NA     | NA     | 2.5907 | 0.1075 | 2.0694  |
| phylum. Firmicutes. id. 1672    | SmallVesselStroke   | Inverse variance weighted | 2 | 0.7111 | 0.3616 | 1.3984  | 0.3231 | NA      | NA     | NA     | 1.2134 | 0.2707 | 2.6199  |
| phylum. Firmicutes. id. 1672    | Stroke              | MR Egger                  | 3 | 0.9967 | 0.7172 | 1.3851  | 0.9875 | -0.0054 | 0.0127 | 0.7433 | 0.4549 | 0.5000 | 54.3625 |
| phylum. Firmicutes. id. 1672    | Stroke              | Weighted median           | 3 | 0.9387 | 0.7913 | 1.1136  | 0.4681 | -0.0054 | 0.0127 | 0.7433 | 0.4549 | 0.5000 | 54.3625 |
| phylum. Firmicutes. id. 1672    | Stroke              | Inverse variance weighted | 3 | 0.9349 | 0.8070 | 1.0829  | 0.3692 | -0.0054 | 0.0127 | 0.7433 | 0.4549 | 0.5000 | 54.3625 |
| phylum. Firmicutes. id. 1672    | Stroke              | Simple mode               | 3 | 0.9127 | 0.7296 | 1.1418  | 0.5080 | -0.0054 | 0.0127 | 0.7433 | 0.4549 | 0.5000 | 54.3625 |
| phylum. Firmicutes. id. 1672    | Stroke              | Weighted mode             | 3 | 0.9651 | 0.7869 | 1.1838  | 0.7659 | -0.0054 | 0.0127 | 0.7433 | 0.4549 | 0.5000 | 54.3625 |
| phylum. Lentisphaerae. id. 2238 | CardioEmbolicStroke | MR Egger                  | 3 | 0.7205 | 0.2036 | 2.5494  | 0.7005 | 0.0322  | 0.0871 | 0.7748 | 2.5560 | 0.1099 | 25.3727 |
| phylum. Lentisphaerae. id. 2238 | CardioEmbolicStroke | Weighted median           | 3 | 0.9482 | 0.7166 | 1.2546  | 0.7095 | 0.0322  | 0.0871 | 0.7748 | 2.5560 | 0.1099 | 25.3727 |
| phylum. Lentisphaerae. id. 2238 | CardioEmbolicStroke | Inverse variance weighted | 3 | 0.9067 | 0.7081 | 1.1611  | 0.4378 | 0.0322  | 0.0871 | 0.7748 | 2.5560 | 0.1099 | 25.3727 |

|                                       |                     |                           |   |        |        |        |        |         |        |        |        |        |          |
|---------------------------------------|---------------------|---------------------------|---|--------|--------|--------|--------|---------|--------|--------|--------|--------|----------|
| phylum. Lentisphaerae. id. 2238       | CardioEmbolicStroke | Simple mode               | 3 | 0.9799 | 0.6839 | 1.4042 | 0.9221 | 0.0322  | 0.0871 | 0.7748 | 2.5560 | 0.1099 | 25.3727  |
| phylum. Lentisphaerae. id. 2238       | CardioEmbolicStroke | Weighted mode             | 3 | 0.9958 | 0.7011 | 1.4144 | 0.9833 | 0.0322  | 0.0871 | 0.7748 | 2.5560 | 0.1099 | 25.3727  |
| phylum. Lentisphaerae. id. 2238       | IschemicStroke      | MR Egger                  | 3 | 0.8781 | 0.6268 | 1.2301 | 0.5879 | 0.0026  | 0.0235 | 0.9290 | 0.0018 | 0.9666 | 44.8007  |
| phylum. Lentisphaerae. id. 2238       | IschemicStroke      | Weighted median           | 3 | 0.8928 | 0.8002 | 0.9961 | 0.0423 | 0.0026  | 0.0235 | 0.9290 | 0.0018 | 0.9666 | 44.8007  |
| phylum. Lentisphaerae. id. 2238       | IschemicStroke      | Inverse variance weighted | 3 | 0.8946 | 0.8190 | 0.9771 | 0.0133 | 0.0026  | 0.0235 | 0.9290 | 0.0018 | 0.9666 | 44.8007  |
| phylum. Lentisphaerae. id. 2238       | IschemicStroke      | Simple mode               | 3 | 0.8913 | 0.7894 | 1.0063 | 0.2042 | 0.0026  | 0.0235 | 0.9290 | 0.0018 | 0.9666 | 44.8007  |
| phylum. Lentisphaerae. id. 2238       | IschemicStroke      | Weighted mode             | 3 | 0.8913 | 0.7917 | 1.0034 | 0.1972 | 0.0026  | 0.0235 | 0.9290 | 0.0018 | 0.9666 | 44.8007  |
| phylum. Lentisphaerae. id. 2238       | LargeArteryStroke   | Inverse variance weighted | 2 | 1.1027 | 0.7905 | 1.5381 | 0.5647 | NA      | NA     | NA     | 0.0025 | 0.9603 | 35.2574  |
| phylum. Lentisphaerae. id. 2238       | SmallVesselStroke   | MR Egger                  | 3 | 1.1848 | 0.3186 | 4.4055 | 0.8422 | -0.0435 | 0.0899 | 0.7134 | 1.7198 | 0.1897 | 23.9989  |
| phylum. Lentisphaerae. id. 2238       | SmallVesselStroke   | Weighted median           | 3 | 0.8607 | 0.6091 | 1.2162 | 0.3951 | -0.0435 | 0.0899 | 0.7134 | 1.7198 | 0.1897 | 23.9989  |
| phylum. Lentisphaerae. id. 2238       | SmallVesselStroke   | Inverse variance weighted | 3 | 0.8665 | 0.6643 | 1.1302 | 0.2905 | -0.0435 | 0.0899 | 0.7134 | 1.7198 | 0.1897 | 23.9989  |
| phylum. Lentisphaerae. id. 2238       | SmallVesselStroke   | Simple mode               | 3 | 0.8319 | 0.5475 | 1.2641 | 0.4795 | -0.0435 | 0.0899 | 0.7134 | 1.7198 | 0.1897 | 23.9989  |
| phylum. Lentisphaerae. id. 2238       | SmallVesselStroke   | Weighted mode             | 3 | 0.8201 | 0.5234 | 1.2851 | 0.4781 | -0.0435 | 0.0899 | 0.7134 | 1.7198 | 0.1897 | 23.9989  |
| phylum. Lentisphaerae. id. 2238       | Stroke              | MR Egger                  | 3 | 0.9457 | 0.6953 | 1.2863 | 0.7824 | -0.0030 | 0.0216 | 0.9107 | 0.0162 | 0.8988 | 75.4293  |
| phylum. Lentisphaerae. id. 2238       | Stroke              | Weighted median           | 3 | 0.9235 | 0.8384 | 1.0173 | 0.1068 | -0.0030 | 0.0216 | 0.9107 | 0.0162 | 0.8988 | 75.4293  |
| phylum. Lentisphaerae. id. 2238       | Stroke              | Inverse variance weighted | 3 | 0.9257 | 0.8533 | 1.0043 | 0.0634 | -0.0030 | 0.0216 | 0.9107 | 0.0162 | 0.8988 | 75.4293  |
| phylum. Lentisphaerae. id. 2238       | Stroke              | Simple mode               | 3 | 0.9210 | 0.8252 | 1.0280 | 0.2799 | -0.0030 | 0.0216 | 0.9107 | 0.0162 | 0.8988 | 75.4293  |
| phylum. Lentisphaerae. id. 2238       | Stroke              | Weighted mode             | 3 | 0.9210 | 0.8292 | 1.0230 | 0.2643 | -0.0030 | 0.0216 | 0.9107 | 0.0162 | 0.8988 | 75.4293  |
| phylum. Tenericutes. id. 3919         | CardioEmbolicStroke | Inverse variance weighted | 2 | 1.0704 | 0.5843 | 1.9611 | 0.8256 | NA      | NA     | NA     | 2.8254 | 0.0928 | 6.2196   |
| phylum. Tenericutes. id. 3919         | IschemicStroke      | Inverse variance weighted | 2 | 0.9628 | 0.8231 | 1.1263 | 0.6360 | NA      | NA     | NA     | 0.0134 | 0.9080 | 71.9594  |
| phylum. Tenericutes. id. 3919         | LargeArteryStroke   | Inverse variance weighted | 2 | 0.8008 | 0.4972 | 1.2899 | 0.3611 | NA      | NA     | NA     | 0.2219 | 0.6376 | 8.4920   |
| phylum. Tenericutes. id. 3919         | SmallVesselStroke   | Inverse variance weighted | 2 | 1.0100 | 0.5755 | 1.7724 | 0.9724 | NA      | NA     | NA     | 1.6009 | 0.2058 | 7.0688   |
| phylum. Tenericutes. id. 3919         | Stroke              | Inverse variance weighted | 2 | 1.0093 | 0.8730 | 1.1668 | 0.9009 | NA      | NA     | NA     | 0.0365 | 0.8485 | 173.7966 |
| phylum. Verrucomicrobia. id. 3982     | CardioEmbolicStroke | Inverse variance weighted | 2 | 0.8952 | 0.6134 | 1.3063 | 0.5658 | NA      | NA     | NA     | 0.6432 | 0.4226 | 22.0572  |
| phylum. Verrucomicrobia. id. 3982     | IschemicStroke      | Inverse variance weighted | 2 | 1.1956 | 1.0094 | 1.4161 | 0.0386 | NA      | NA     | NA     | 0.2110 | 0.6460 | 19.3046  |
| phylum. Verrucomicrobia. id. 3982     | LargeArteryStroke   | Inverse variance weighted | 2 | 1.2046 | 0.7317 | 1.9830 | 0.4643 | NA      | NA     | NA     | 0.8605 | 0.3536 | 6.0661   |
| phylum. Verrucomicrobia. id. 3982     | SmallVesselStroke   | Inverse variance weighted | 2 | 1.5697 | 0.9783 | 2.5187 | 0.0616 | NA      | NA     | NA     | 0.0064 | 0.9362 | 4.8503   |
| phylum. Verrucomicrobia. id. 3982     | Stroke              | Inverse variance weighted | 2 | 1.1767 | 1.0076 | 1.3743 | 0.0399 | NA      | NA     | NA     | 0.0018 | 0.9657 | 19.8651  |
| class. Verrucomicrobiae. id. 4029     | CardioEmbolicStroke | Wald ratio                | 1 | 0.4383 | 0.2392 | 0.8030 | 0.0076 | NA      | NA     | NA     | NA     | NA     | NA       |
| class. Verrucomicrobiae. id. 4029     | IschemicStroke      | Wald ratio                | 1 | 0.9308 | 0.7229 | 1.1986 | 0.5785 | NA      | NA     | NA     | NA     | NA     | NA       |
| class. Verrucomicrobiae. id. 4029     | LargeArteryStroke   | Wald ratio                | 1 | 1.2125 | 0.5336 | 2.7553 | 0.6455 | NA      | NA     | NA     | NA     | NA     | NA       |
| class. Verrucomicrobiae. id. 4029     | SmallVesselStroke   | Wald ratio                | 1 | 1.2537 | 0.6173 | 2.5462 | 0.5316 | NA      | NA     | NA     | NA     | NA     | NA       |
| class. Verrucomicrobiae. id. 4029     | Stroke              | Wald ratio                | 1 | 0.9249 | 0.7319 | 1.1689 | 0.5135 | NA      | NA     | NA     | NA     | NA     | NA       |
| family. Actinomycetaceae. id. 421     | CardioEmbolicStroke | Wald ratio                | 1 | 0.7940 | 0.4949 | 1.2739 | 0.3389 | NA      | NA     | NA     | NA     | NA     | NA       |
| family. Actinomycetaceae. id. 421     | IschemicStroke      | Wald ratio                | 1 | 0.9830 | 0.7974 | 1.2118 | 0.8725 | NA      | NA     | NA     | NA     | NA     | NA       |
| family. Actinomycetaceae. id. 421     | LargeArteryStroke   | Wald ratio                | 1 | 1.2863 | 0.6848 | 2.4160 | 0.4338 | NA      | NA     | NA     | NA     | NA     | NA       |
| family. Actinomycetaceae. id. 421     | SmallVesselStroke   | Wald ratio                | 1 | 0.7089 | 0.3944 | 1.2743 | 0.2502 | NA      | NA     | NA     | NA     | NA     | NA       |
| family. Actinomycetaceae. id. 421     | Stroke              | Wald ratio                | 1 | 0.9804 | 0.8098 | 1.1870 | 0.8394 | NA      | NA     | NA     | NA     | NA     | NA       |
| family. Bacteroidaceae. id. 917       | CardioEmbolicStroke | Wald ratio                | 1 | 0.8075 | 0.3979 | 1.6389 | 0.5539 | NA      | NA     | NA     | NA     | NA     | NA       |
| family. Bacteroidaceae. id. 917       | IschemicStroke      | Wald ratio                | 1 | 0.7547 | 0.5523 | 1.0313 | 0.0773 | NA      | NA     | NA     | NA     | NA     | NA       |
| family. Bacteroidaceae. id. 917       | LargeArteryStroke   | Wald ratio                | 1 | 0.4673 | 0.1889 | 1.1558 | 0.0997 | NA      | NA     | NA     | NA     | NA     | NA       |
| family. Bacteroidaceae. id. 917       | SmallVesselStroke   | Wald ratio                | 1 | 0.6841 | 0.2891 | 1.6187 | 0.3876 | NA      | NA     | NA     | NA     | NA     | NA       |
| family. Bacteroidaceae. id. 917       | Stroke              | Wald ratio                | 1 | 0.7597 | 0.5691 | 1.0141 | 0.0622 | NA      | NA     | NA     | NA     | NA     | NA       |
| family. Christensenellaceae. id. 1866 | CardioEmbolicStroke | Wald ratio                | 1 | 1.0875 | 0.5879 | 2.0117 | 0.7894 | NA      | NA     | NA     | NA     | NA     | NA       |
| family. Christensenellaceae. id. 1866 | IschemicStroke      | Wald ratio                | 1 | 0.7838 | 0.6018 | 1.0209 | 0.0708 | NA      | NA     | NA     | NA     | NA     | NA       |
| family. Christensenellaceae. id. 1866 | LargeArteryStroke   | Wald ratio                | 1 | 0.5529 | 0.2426 | 1.2602 | 0.1586 | NA      | NA     | NA     | NA     | NA     | NA       |
| family. Christensenellaceae. id. 1866 | SmallVesselStroke   | Wald ratio                | 1 | 0.3156 | 0.1457 | 0.6835 | 0.0034 | NA      | NA     | NA     | NA     | NA     | NA       |
| family. Christensenellaceae. id. 1866 | Stroke              | Wald ratio                | 1 | 0.7373 | 0.5775 | 0.9413 | 0.0145 | NA      | NA     | NA     | NA     | NA     | NA       |
| family. Enterobacteriaceae. id. 3469  | CardioEmbolicStroke | Wald ratio                | 1 | 0.9704 | 0.4993 | 1.8860 | 0.9295 | NA      | NA     | NA     | NA     | NA     | NA       |
| family. Enterobacteriaceae. id. 3469  | IschemicStroke      | Wald ratio                | 1 | 1.1028 | 0.8326 | 1.4606 | 0.4951 | NA      | NA     | NA     | NA     | NA     | NA       |
| family. Enterobacteriaceae. id. 3469  | LargeArteryStroke   | Wald ratio                | 1 | 0.9769 | 0.3721 | 2.5646 | 0.9622 | NA      | NA     | NA     | NA     | NA     | NA       |
| family. Enterobacteriaceae. id. 3469  | SmallVesselStroke   | Wald ratio                | 1 | 0.8849 | 0.3767 | 2.0787 | 0.7790 | NA      | NA     | NA     | NA     | NA     | NA       |
| family. Enterobacteriaceae. id. 3469  | Stroke              | Wald ratio                | 1 | 1.0455 | 0.8049 | 1.3578 | 0.7389 | NA      | NA     | NA     | NA     | NA     | NA       |
| family. Lachnospiraceae. id. 1987     | CardioEmbolicStroke | Wald ratio                | 1 | 0.9319 | 0.5723 | 1.5174 | 0.7768 | NA      | NA     | NA     | NA     | NA     | NA       |

|                                                |                     |            |   |        |        |        |        |    |    |    |    |    |
|------------------------------------------------|---------------------|------------|---|--------|--------|--------|--------|----|----|----|----|----|
| family. Lachnospiraceae. id. 1987              | IschemicStroke      | Wald ratio | 1 | 1.0803 | 0.8999 | 1.2969 | 0.4071 | NA | NA | NA | NA | NA |
| family. Lachnospiraceae. id. 1987              | SmallVesselStroke   | Wald ratio | 1 | 1.7444 | 0.9590 | 3.1729 | 0.0683 | NA | NA | NA | NA | NA |
| family. Lachnospiraceae. id. 1987              | Stroke              | Wald ratio | 1 | 1.0520 | 0.8872 | 1.2475 | 0.5597 | NA | NA | NA | NA | NA |
| family. Porphyromonadaceae. id. 943            | CardioEmbolicStroke | Wald ratio | 1 | 0.5914 | 0.2995 | 1.1677 | 0.1302 | NA | NA | NA | NA | NA |
| family. Porphyromonadaceae. id. 943            | IschemicStroke      | Wald ratio | 1 | 0.9728 | 0.7216 | 1.3116 | 0.8566 | NA | NA | NA | NA | NA |
| family. Porphyromonadaceae. id. 943            | LargeArteryStroke   | Wald ratio | 1 | 1.7671 | 0.7185 | 4.3458 | 0.2150 | NA | NA | NA | NA | NA |
| family. Porphyromonadaceae. id. 943            | SmallVesselStroke   | Wald ratio | 1 | 0.7440 | 0.3216 | 1.7212 | 0.4896 | NA | NA | NA | NA | NA |
| family. Porphyromonadaceae. id. 943            | Stroke              | Wald ratio | 1 | 0.9056 | 0.6839 | 1.1991 | 0.4887 | NA | NA | NA | NA | NA |
| family. unknownfamily. id. 1000005471          | CardioEmbolicStroke | Wald ratio | 1 | 1.5414 | 0.9022 | 2.6335 | 0.1133 | NA | NA | NA | NA | NA |
| family. unknownfamily. id. 1000005471          | IschemicStroke      | Wald ratio | 1 | 1.1863 | 0.9369 | 1.5019 | 0.1559 | NA | NA | NA | NA | NA |
| family. unknownfamily. id. 1000005471          | LargeArteryStroke   | Wald ratio | 1 | 1.8137 | 0.8767 | 3.7520 | 0.1084 | NA | NA | NA | NA | NA |
| family. unknownfamily. id. 1000005471          | SmallVesselStroke   | Wald ratio | 1 | 1.7471 | 0.8973 | 3.4017 | 0.1008 | NA | NA | NA | NA | NA |
| family. unknownfamily. id. 1000005471          | Stroke              | Wald ratio | 1 | 1.1690 | 0.9442 | 1.4474 | 0.1519 | NA | NA | NA | NA | NA |
| family. Veillonellaceae. id. 2172              | CardioEmbolicStroke | Wald ratio | 1 | 1.5789 | 0.8809 | 2.8302 | 0.1250 | NA | NA | NA | NA | NA |
| family. Veillonellaceae. id. 2172              | IschemicStroke      | Wald ratio | 1 | 1.0030 | 0.7795 | 1.2906 | 0.9812 | NA | NA | NA | NA | NA |
| family. Veillonellaceae. id. 2172              | LargeArteryStroke   | Wald ratio | 1 | 0.8696 | 0.4033 | 1.8747 | 0.7214 | NA | NA | NA | NA | NA |
| family. Veillonellaceae. id. 2172              | SmallVesselStroke   | Wald ratio | 1 | 1.2134 | 0.5891 | 2.4992 | 0.5998 | NA | NA | NA | NA | NA |
| family. Veillonellaceae. id. 2172              | Stroke              | Wald ratio | 1 | 1.0530 | 0.8348 | 1.3283 | 0.6629 | NA | NA | NA | NA | NA |
| family. Verrucomicrobiaceae. id. 4036          | CardioEmbolicStroke | Wald ratio | 1 | 0.4386 | 0.2395 | 0.8032 | 0.0076 | NA | NA | NA | NA | NA |
| family. Verrucomicrobiaceae. id. 4036          | IschemicStroke      | Wald ratio | 1 | 0.9309 | 0.7231 | 1.1984 | 0.5785 | NA | NA | NA | NA | NA |
| family. Verrucomicrobiaceae. id. 4036          | LargeArteryStroke   | Wald ratio | 1 | 1.2123 | 0.5338 | 2.7533 | 0.6455 | NA | NA | NA | NA | NA |
| family. Verrucomicrobiaceae. id. 4036          | SmallVesselStroke   | Wald ratio | 1 | 1.2535 | 0.6175 | 2.5445 | 0.5316 | NA | NA | NA | NA | NA |
| family. Verrucomicrobiaceae. id. 4036          | Stroke              | Wald ratio | 1 | 0.9250 | 0.7321 | 1.1688 | 0.5135 | NA | NA | NA | NA | NA |
| genus. Eubacteriumeligensgroup. id. 14372      | CardioEmbolicStroke | Wald ratio | 1 | 0.8601 | 0.4507 | 1.6411 | 0.6474 | NA | NA | NA | NA | NA |
| genus. Eubacteriumeligensgroup. id. 14372      | IschemicStroke      | Wald ratio | 1 | 0.8495 | 0.6448 | 1.1191 | 0.2460 | NA | NA | NA | NA | NA |
| genus. Eubacteriumeligensgroup. id. 14372      | LargeArteryStroke   | Wald ratio | 1 | 0.3446 | 0.1497 | 0.7930 | 0.0122 | NA | NA | NA | NA | NA |
| genus. Eubacteriumeligensgroup. id. 14372      | SmallVesselStroke   | Wald ratio | 1 | 0.3843 | 0.1730 | 0.8538 | 0.0189 | NA | NA | NA | NA | NA |
| genus. Eubacteriumeligensgroup. id. 14372      | Stroke              | Wald ratio | 1 | 0.8767 | 0.6788 | 1.1322 | 0.3132 | NA | NA | NA | NA | NA |
| genus. Eubacteriumfissicatenagroup. id. 14373  | CardioEmbolicStroke | Wald ratio | 1 | 1.3033 | 0.9876 | 1.7199 | 0.0613 | NA | NA | NA | NA | NA |
| genus. Eubacteriumfissicatenagroup. id. 14373  | IschemicStroke      | Wald ratio | 1 | 1.0552 | 0.9293 | 1.1982 | 0.4070 | NA | NA | NA | NA | NA |
| genus. Eubacteriumfissicatenagroup. id. 14373  | LargeArteryStroke   | Wald ratio | 1 | 1.1816 | 0.8184 | 1.7059 | 0.3733 | NA | NA | NA | NA | NA |
| genus. Eubacteriumfissicatenagroup. id. 14373  | SmallVesselStroke   | Wald ratio | 1 | 0.8653 | 0.6106 | 1.2263 | 0.4160 | NA | NA | NA | NA | NA |
| genus. Eubacteriumfissicatenagroup. id. 14373  | Stroke              | Wald ratio | 1 | 1.0527 | 0.9358 | 1.1843 | 0.3924 | NA | NA | NA | NA | NA |
| genus. Eubacteriumxylanophilumgroup. id. 14375 | CardioEmbolicStroke | Wald ratio | 1 | 1.0045 | 0.5854 | 1.7235 | 0.9871 | NA | NA | NA | NA | NA |
| genus. Eubacteriumxylanophilumgroup. id. 14375 | IschemicStroke      | Wald ratio | 1 | 1.2354 | 0.9754 | 1.5649 | 0.0796 | NA | NA | NA | NA | NA |
| genus. Eubacteriumxylanophilumgroup. id. 14375 | LargeArteryStroke   | Wald ratio | 1 | 0.7987 | 0.3907 | 1.6326 | 0.5377 | NA | NA | NA | NA | NA |
| genus. Eubacteriumxylanophilumgroup. id. 14375 | SmallVesselStroke   | Wald ratio | 1 | 1.6321 | 0.8366 | 3.1841 | 0.1508 | NA | NA | NA | NA | NA |
| genus. Eubacteriumxylanophilumgroup. id. 14375 | Stroke              | Wald ratio | 1 | 1.1640 | 0.9379 | 1.4446 | 0.1681 | NA | NA | NA | NA | NA |
| genus. Alistipes. id. 968                      | CardioEmbolicStroke | Wald ratio | 1 | 1.0434 | 0.4987 | 2.1831 | 0.9101 | NA | NA | NA | NA | NA |
| genus. Alistipes. id. 968                      | IschemicStroke      | Wald ratio | 1 | 0.9980 | 0.6927 | 1.4378 | 0.9913 | NA | NA | NA | NA | NA |
| genus. Alistipes. id. 968                      | LargeArteryStroke   | Wald ratio | 1 | 0.9148 | 0.3432 | 2.4381 | 0.8586 | NA | NA | NA | NA | NA |
| genus. Alistipes. id. 968                      | SmallVesselStroke   | Wald ratio | 1 | 0.4144 | 0.1631 | 1.0532 | 0.0642 | NA | NA | NA | NA | NA |
| genus. Alistipes. id. 968                      | Stroke              | Wald ratio | 1 | 1.0288 | 0.7371 | 1.4358 | 0.8676 | NA | NA | NA | NA | NA |
| genus. Anaerofilum. id. 2053                   | CardioEmbolicStroke | Wald ratio | 1 | 1.1910 | 0.8385 | 1.6918 | 0.3290 | NA | NA | NA | NA | NA |
| genus. Anaerofilum. id. 2053                   | IschemicStroke      | Wald ratio | 1 | 0.9883 | 0.8450 | 1.1560 | 0.8834 | NA | NA | NA | NA | NA |
| genus. Anaerofilum. id. 2053                   | LargeArteryStroke   | Wald ratio | 1 | 0.9066 | 0.5714 | 1.4385 | 0.6772 | NA | NA | NA | NA | NA |
| genus. Anaerofilum. id. 2053                   | SmallVesselStroke   | Wald ratio | 1 | 0.7396 | 0.4769 | 1.1469 | 0.1778 | NA | NA | NA | NA | NA |
| genus. Anaerofilum. id. 2053                   | Stroke              | Wald ratio | 1 | 1.0215 | 0.8807 | 1.1849 | 0.7782 | NA | NA | NA | NA | NA |
| genus. Anaerostipes. id. 1991                  | CardioEmbolicStroke | Wald ratio | 1 | 0.9682 | 0.5143 | 1.8229 | 0.9203 | NA | NA | NA | NA | NA |
| genus. Anaerostipes. id. 1991                  | IschemicStroke      | Wald ratio | 1 | 0.9095 | 0.6869 | 1.2043 | 0.5080 | NA | NA | NA | NA | NA |
| genus. Anaerostipes. id. 1991                  | LargeArteryStroke   | Wald ratio | 1 | 0.9920 | 0.4324 | 2.2758 | 0.9848 | NA | NA | NA | NA | NA |
| genus. Anaerostipes. id. 1991                  | SmallVesselStroke   | Wald ratio | 1 | 0.9489 | 0.4354 | 2.0679 | 0.8950 | NA | NA | NA | NA | NA |
| genus. Anaerostipes. id. 1991                  | Stroke              | Wald ratio | 1 | 0.8950 | 0.6894 | 1.1619 | 0.4047 | NA | NA | NA | NA | NA |
| genus. Anaerotruncus. id. 2054                 | CardioEmbolicStroke | Wald ratio | 1 | 1.8046 | 0.9207 | 3.5372 | 0.0856 | NA | NA | NA | NA | NA |

|                                           |                     |            |   |        |        |        |        |    |    |    |    |    |
|-------------------------------------------|---------------------|------------|---|--------|--------|--------|--------|----|----|----|----|----|
| genus. Anaerotruncus. id. 2054            | IschemicStroke      | Wald ratio | 1 | 1.2255 | 0.9124 | 1.6462 | 0.1767 | NA | NA | NA | NA | NA |
| genus. Anaerotruncus. id. 2054            | LargeArteryStroke   | Wald ratio | 1 | 2.9611 | 1.2506 | 7.0113 | 0.0136 | NA | NA | NA | NA | NA |
| genus. Anaerotruncus. id. 2054            | SmallVesselStroke   | Wald ratio | 1 | 1.6151 | 0.7036 | 3.7072 | 0.2581 | NA | NA | NA | NA | NA |
| genus. Anaerotruncus. id. 2054            | Stroke              | Wald ratio | 1 | 1.2617 | 0.9614 | 1.6557 | 0.0937 | NA | NA | NA | NA | NA |
| genus. Bacteroides. id. 918               | CardioEmbolicStroke | Wald ratio | 1 | 0.8075 | 0.3979 | 1.6389 | 0.5539 | NA | NA | NA | NA | NA |
| genus. Bacteroides. id. 918               | IschemicStroke      | Wald ratio | 1 | 0.7547 | 0.5523 | 1.0313 | 0.0773 | NA | NA | NA | NA | NA |
| genus. Bacteroides. id. 918               | LargeArteryStroke   | Wald ratio | 1 | 0.4673 | 0.1889 | 1.1558 | 0.0997 | NA | NA | NA | NA | NA |
| genus. Bacteroides. id. 918               | SmallVesselStroke   | Wald ratio | 1 | 0.6841 | 0.2891 | 1.6187 | 0.3876 | NA | NA | NA | NA | NA |
| genus. Bacteroides. id. 918               | Stroke              | Wald ratio | 1 | 0.7597 | 0.5691 | 1.0141 | 0.0622 | NA | NA | NA | NA | NA |
| genus. Barnesiella. id. 944               | CardioEmbolicStroke | Wald ratio | 1 | 0.6685 | 0.3389 | 1.3187 | 0.2453 | NA | NA | NA | NA | NA |
| genus. Barnesiella. id. 944               | IschemicStroke      | Wald ratio | 1 | 0.9040 | 0.6837 | 1.1951 | 0.4785 | NA | NA | NA | NA | NA |
| genus. Barnesiella. id. 944               | LargeArteryStroke   | Wald ratio | 1 | 3.0325 | 1.0124 | 9.0835 | 0.0475 | NA | NA | NA | NA | NA |
| genus. Barnesiella. id. 944               | SmallVesselStroke   | Wald ratio | 1 | 0.7370 | 0.3032 | 1.7916 | 0.5008 | NA | NA | NA | NA | NA |
| genus. Barnesiella. id. 944               | Stroke              | Wald ratio | 1 | 0.9933 | 0.7680 | 1.2847 | 0.9591 | NA | NA | NA | NA | NA |
| genus. Butyrivicoccus. id. 2055           | CardioEmbolicStroke | Wald ratio | 1 | 1.2997 | 0.6359 | 2.6563 | 0.4723 | NA | NA | NA | NA | NA |
| genus. Butyrivicoccus. id. 2055           | IschemicStroke      | Wald ratio | 1 | 1.1026 | 0.8091 | 1.5026 | 0.5362 | NA | NA | NA | NA | NA |
| genus. Butyrivicoccus. id. 2055           | LargeArteryStroke   | Wald ratio | 1 | 0.5777 | 0.2094 | 1.5938 | 0.2893 | NA | NA | NA | NA | NA |
| genus. Butyrivicoccus. id. 2055           | SmallVesselStroke   | Wald ratio | 1 | 3.2292 | 1.3556 | 7.6921 | 0.0081 | NA | NA | NA | NA | NA |
| genus. Butyrivicoccus. id. 2055           | Stroke              | Wald ratio | 1 | 1.1098 | 0.8301 | 1.4838 | 0.4819 | NA | NA | NA | NA | NA |
| genus. Clostridiumsensustrictol. id. 1873 | LargeArteryStroke   | Wald ratio | 1 | 0.7902 | 0.4292 | 1.4549 | 0.4496 | NA | NA | NA | NA | NA |
| genus. Clostridiumsensustrictol. id. 1873 | SmallVesselStroke   | Wald ratio | 1 | 0.8619 | 0.5113 | 1.4528 | 0.5768 | NA | NA | NA | NA | NA |
| genus. Coprobacter. id. 949               | CardioEmbolicStroke | Wald ratio | 1 | 1.1102 | 0.7370 | 1.6722 | 0.6171 | NA | NA | NA | NA | NA |
| genus. Coprobacter. id. 949               | IschemicStroke      | Wald ratio | 1 | 1.0366 | 0.8634 | 1.2445 | 0.6998 | NA | NA | NA | NA | NA |
| genus. Coprobacter. id. 949               | LargeArteryStroke   | Wald ratio | 1 | 1.2064 | 0.6987 | 2.0831 | 0.5007 | NA | NA | NA | NA | NA |
| genus. Coprobacter. id. 949               | SmallVesselStroke   | Wald ratio | 1 | 0.9593 | 0.5768 | 1.5955 | 0.8727 | NA | NA | NA | NA | NA |
| genus. Coprobacter. id. 949               | Stroke              | Wald ratio | 1 | 1.0170 | 0.8565 | 1.2076 | 0.8475 | NA | NA | NA | NA | NA |
| genus. Coprococcus2. id. 11302            | CardioEmbolicStroke | Wald ratio | 1 | 0.7536 | 0.4381 | 1.2963 | 0.3066 | NA | NA | NA | NA | NA |
| genus. Coprococcus2. id. 11302            | IschemicStroke      | Wald ratio | 1 | 1.0219 | 0.7970 | 1.3101 | 0.8644 | NA | NA | NA | NA | NA |
| genus. Coprococcus2. id. 11302            | LargeArteryStroke   | Wald ratio | 1 | 0.7967 | 0.3861 | 1.6438 | 0.5385 | NA | NA | NA | NA | NA |
| genus. Coprococcus2. id. 11302            | SmallVesselStroke   | Wald ratio | 1 | 1.4764 | 0.7534 | 2.8933 | 0.2563 | NA | NA | NA | NA | NA |
| genus. Coprococcus2. id. 11302            | Stroke              | Wald ratio | 1 | 0.9429 | 0.7558 | 1.1764 | 0.6027 | NA | NA | NA | NA | NA |
| genus. Dorea. id. 1997                    | CardioEmbolicStroke | Wald ratio | 1 | 1.2073 | 0.5676 | 2.5680 | 0.6246 | NA | NA | NA | NA | NA |
| genus. Dorea. id. 1997                    | IschemicStroke      | Wald ratio | 1 | 0.9346 | 0.6806 | 1.2834 | 0.6762 | NA | NA | NA | NA | NA |
| genus. Dorea. id. 1997                    | LargeArteryStroke   | Wald ratio | 1 | 1.4517 | 0.4931 | 4.2742 | 0.4987 | NA | NA | NA | NA | NA |
| genus. Dorea. id. 1997                    | SmallVesselStroke   | Wald ratio | 1 | 0.6721 | 0.2524 | 1.7899 | 0.4266 | NA | NA | NA | NA | NA |
| genus. Dorea. id. 1997                    | Stroke              | Wald ratio | 1 | 1.0504 | 0.7804 | 1.4137 | 0.7457 | NA | NA | NA | NA | NA |
| genus. Erysipelatoclostridium. id. 11381  | CardioEmbolicStroke | Wald ratio | 1 | 1.2048 | 0.7415 | 1.9577 | 0.4518 | NA | NA | NA | NA | NA |
| genus. Erysipelatoclostridium. id. 11381  | IschemicStroke      | Wald ratio | 1 | 0.9786 | 0.7860 | 1.2184 | 0.8465 | NA | NA | NA | NA | NA |
| genus. Erysipelatoclostridium. id. 11381  | LargeArteryStroke   | Wald ratio | 1 | 0.8719 | 0.4583 | 1.6590 | 0.6763 | NA | NA | NA | NA | NA |
| genus. Erysipelatoclostridium. id. 11381  | SmallVesselStroke   | Wald ratio | 1 | 1.7385 | 0.9488 | 3.1855 | 0.0735 | NA | NA | NA | NA | NA |
| genus. Erysipelatoclostridium. id. 11381  | Stroke              | Wald ratio | 1 | 0.9530 | 0.7856 | 1.1562 | 0.6257 | NA | NA | NA | NA | NA |
| genus. Escherichia. Shigella. id. 3504    | CardioEmbolicStroke | Wald ratio | 1 | 0.4998 | 0.3009 | 0.8300 | 0.0074 | NA | NA | NA | NA | NA |
| genus. Escherichia. Shigella. id. 3504    | IschemicStroke      | Wald ratio | 1 | 0.9084 | 0.7281 | 1.1334 | 0.3950 | NA | NA | NA | NA | NA |
| genus. Escherichia. Shigella. id. 3504    | LargeArteryStroke   | Wald ratio | 1 | 0.6431 | 0.3203 | 1.2912 | 0.2145 | NA | NA | NA | NA | NA |
| genus. Escherichia. Shigella. id. 3504    | SmallVesselStroke   | Wald ratio | 1 | 1.1138 | 0.5742 | 2.1604 | 0.7498 | NA | NA | NA | NA | NA |
| genus. Escherichia. Shigella. id. 3504    | Stroke              | Wald ratio | 1 | 0.9071 | 0.7407 | 1.1108 | 0.3455 | NA | NA | NA | NA | NA |
| genus. FamilyXIIHUCG001. id. 11294        | CardioEmbolicStroke | Wald ratio | 1 | 1.7340 | 0.9652 | 3.1153 | 0.0655 | NA | NA | NA | NA | NA |
| genus. FamilyXIIHUCG001. id. 11294        | IschemicStroke      | Wald ratio | 1 | 0.9484 | 0.7290 | 1.2338 | 0.6929 | NA | NA | NA | NA | NA |
| genus. FamilyXIIHUCG001. id. 11294        | LargeArteryStroke   | Wald ratio | 1 | 0.8705 | 0.3980 | 1.9039 | 0.7282 | NA | NA | NA | NA | NA |
| genus. FamilyXIIHUCG001. id. 11294        | SmallVesselStroke   | Wald ratio | 1 | 1.0462 | 0.5010 | 2.1844 | 0.9044 | NA | NA | NA | NA | NA |
| genus. FamilyXIIHUCG001. id. 11294        | Stroke              | Wald ratio | 1 | 0.9283 | 0.7279 | 1.1838 | 0.5485 | NA | NA | NA | NA | NA |
| genus. Gordonibacter. id. 821             | CardioEmbolicStroke | Wald ratio | 1 | 1.0913 | 0.7874 | 1.5126 | 0.5997 | NA | NA | NA | NA | NA |
| genus. Gordonibacter. id. 821             | IschemicStroke      | Wald ratio | 1 | 0.9539 | 0.8330 | 1.0922 | 0.4941 | NA | NA | NA | NA | NA |
| genus. Gordonibacter. id. 821             | LargeArteryStroke   | Wald ratio | 1 | 1.4345 | 0.9060 | 2.2712 | 0.1238 | NA | NA | NA | NA | NA |

|                                               |                     |            |   |        |        |        |        |    |    |    |    |    |
|-----------------------------------------------|---------------------|------------|---|--------|--------|--------|--------|----|----|----|----|----|
| genus. Gordonibacter. id. 821                 | SmallVesselStroke   | Wald ratio | 1 | 1.1910 | 0.7952 | 1.7838 | 0.3964 | NA | NA | NA | NA | NA |
| genus. Gordonibacter. id. 821                 | Stroke              | Wald ratio | 1 | 0.9332 | 0.8236 | 1.0575 | 0.2787 | NA | NA | NA | NA | NA |
| genus. LachnospiraceaeNK4A136group. id. 11319 | CardioEmbolicStroke | Wald ratio | 1 | 0.9961 | 0.5286 | 1.8768 | 0.9903 | NA | NA | NA | NA | NA |
| genus. LachnospiraceaeNK4A136group. id. 11319 | IschemicStroke      | Wald ratio | 1 | 1.0464 | 0.7923 | 1.3819 | 0.7494 | NA | NA | NA | NA | NA |
| genus. LachnospiraceaeNK4A136group. id. 11319 | LargeArteryStroke   | Wald ratio | 1 | 2.0734 | 0.8864 | 4.8501 | 0.0926 | NA | NA | NA | NA | NA |
| genus. LachnospiraceaeNK4A136group. id. 11319 | SmallVesselStroke   | Wald ratio | 1 | 0.2838 | 0.1296 | 0.6218 | 0.0016 | NA | NA | NA | NA | NA |
| genus. LachnospiraceaeNK4A136group. id. 11319 | Stroke              | Wald ratio | 1 | 0.9824 | 0.7584 | 1.2726 | 0.8931 | NA | NA | NA | NA | NA |
| genus. Methanobrevibacter. id. 123            | CardioEmbolicStroke | Wald ratio | 1 | 0.8407 | 0.6277 | 1.1261 | 0.2445 | NA | NA | NA | NA | NA |
| genus. Methanobrevibacter. id. 123            | IschemicStroke      | Wald ratio | 1 | 0.9050 | 0.7922 | 1.0338 | 0.1414 | NA | NA | NA | NA | NA |
| genus. Methanobrevibacter. id. 123            | LargeArteryStroke   | Wald ratio | 1 | 0.8970 | 0.6150 | 1.3083 | 0.5724 | NA | NA | NA | NA | NA |
| genus. Methanobrevibacter. id. 123            | SmallVesselStroke   | Wald ratio | 1 | 0.7214 | 0.4976 | 1.0458 | 0.0848 | NA | NA | NA | NA | NA |
| genus. Methanobrevibacter. id. 123            | Stroke              | Wald ratio | 1 | 0.9331 | 0.8254 | 1.0549 | 0.2686 | NA | NA | NA | NA | NA |
| genus. Parabacteroides. id. 954               | CardioEmbolicStroke | Wald ratio | 1 | 0.9911 | 0.5234 | 1.8766 | 0.9781 | NA | NA | NA | NA | NA |
| genus. Parabacteroides. id. 954               | IschemicStroke      | Wald ratio | 1 | 0.8039 | 0.6072 | 1.0643 | 0.1273 | NA | NA | NA | NA | NA |
| genus. Parabacteroides. id. 954               | LargeArteryStroke   | Wald ratio | 1 | 0.6662 | 0.2791 | 1.5899 | 0.3600 | NA | NA | NA | NA | NA |
| genus. Parabacteroides. id. 954               | SmallVesselStroke   | Wald ratio | 1 | 1.4406 | 0.6498 | 3.1941 | 0.3688 | NA | NA | NA | NA | NA |
| genus. Parabacteroides. id. 954               | Stroke              | Wald ratio | 1 | 0.7728 | 0.5961 | 1.0019 | 0.0517 | NA | NA | NA | NA | NA |
| genus. Phascolarctobacterium. id. 2168        | CardioEmbolicStroke | Wald ratio | 1 | 1.2043 | 0.7169 | 2.0232 | 0.4824 | NA | NA | NA | NA | NA |
| genus. Phascolarctobacterium. id. 2168        | IschemicStroke      | Wald ratio | 1 | 1.1688 | 0.9300 | 1.4689 | 0.1809 | NA | NA | NA | NA | NA |
| genus. Phascolarctobacterium. id. 2168        | LargeArteryStroke   | Wald ratio | 1 | 0.8489 | 0.4330 | 1.6642 | 0.6333 | NA | NA | NA | NA | NA |
| genus. Phascolarctobacterium. id. 2168        | SmallVesselStroke   | Wald ratio | 1 | 0.8678 | 0.4565 | 1.6496 | 0.6652 | NA | NA | NA | NA | NA |
| genus. Phascolarctobacterium. id. 2168        | Stroke              | Wald ratio | 1 | 1.1874 | 0.9595 | 1.4693 | 0.1142 | NA | NA | NA | NA | NA |
| genus. Ruminococcus2. id. 11374               | CardioEmbolicStroke | Wald ratio | 1 | 0.9469 | 0.5166 | 1.7357 | 0.8599 | NA | NA | NA | NA | NA |
| genus. Ruminococcus2. id. 11374               | IschemicStroke      | Wald ratio | 1 | 1.1958 | 0.9153 | 1.5624 | 0.1898 | NA | NA | NA | NA | NA |
| genus. Ruminococcus2. id. 11374               | LargeArteryStroke   | Wald ratio | 1 | 1.7441 | 0.7637 | 3.9831 | 0.1868 | NA | NA | NA | NA | NA |
| genus. Ruminococcus2. id. 11374               | SmallVesselStroke   | Wald ratio | 1 | 0.9512 | 0.4486 | 2.0169 | 0.8962 | NA | NA | NA | NA | NA |
| genus. Ruminococcus2. id. 11374               | Stroke              | Wald ratio | 1 | 1.1409 | 0.8916 | 1.4600 | 0.2945 | NA | NA | NA | NA | NA |
| genus. unknowngenus. id. 1000005472           | CardioEmbolicStroke | Wald ratio | 1 | 1.5414 | 0.9022 | 2.6335 | 0.1133 | NA | NA | NA | NA | NA |
| genus. unknowngenus. id. 1000005472           | IschemicStroke      | Wald ratio | 1 | 1.1863 | 0.9369 | 1.5019 | 0.1559 | NA | NA | NA | NA | NA |
| genus. unknowngenus. id. 1000005472           | LargeArteryStroke   | Wald ratio | 1 | 1.8137 | 0.8767 | 3.7520 | 0.1084 | NA | NA | NA | NA | NA |
| genus. unknowngenus. id. 1000005472           | SmallVesselStroke   | Wald ratio | 1 | 1.7471 | 0.8973 | 3.4017 | 0.1008 | NA | NA | NA | NA | NA |
| genus. unknowngenus. id. 1000005472           | Stroke              | Wald ratio | 1 | 1.1690 | 0.9442 | 1.4474 | 0.1519 | NA | NA | NA | NA | NA |
| genus. Veillonella. id. 2198                  | CardioEmbolicStroke | Wald ratio | 1 | 1.0051 | 0.6466 | 1.5624 | 0.9819 | NA | NA | NA | NA | NA |
| genus. Veillonella. id. 2198                  | IschemicStroke      | Wald ratio | 1 | 0.9273 | 0.7665 | 1.1219 | 0.4376 | NA | NA | NA | NA | NA |
| genus. Veillonella. id. 2198                  | LargeArteryStroke   | Wald ratio | 1 | 0.8234 | 0.4580 | 1.4801 | 0.5160 | NA | NA | NA | NA | NA |
| genus. Veillonella. id. 2198                  | SmallVesselStroke   | Wald ratio | 1 | 1.0660 | 0.6142 | 1.8502 | 0.8202 | NA | NA | NA | NA | NA |
| genus. Veillonella. id. 2198                  | Stroke              | Wald ratio | 1 | 0.9214 | 0.7732 | 1.0981 | 0.3606 | NA | NA | NA | NA | NA |
| order. Actinomycetales. id. 420               | CardioEmbolicStroke | Wald ratio | 1 | 0.7932 | 0.4934 | 1.2752 | 0.3389 | NA | NA | NA | NA | NA |
| order. Actinomycetales. id. 420               | IschemicStroke      | Wald ratio | 1 | 0.9829 | 0.7967 | 1.2128 | 0.8725 | NA | NA | NA | NA | NA |
| order. Actinomycetales. id. 420               | LargeArteryStroke   | Wald ratio | 1 | 1.2876 | 0.6837 | 2.4248 | 0.4338 | NA | NA | NA | NA | NA |
| order. Actinomycetales. id. 420               | SmallVesselStroke   | Wald ratio | 1 | 0.7079 | 0.3929 | 1.2756 | 0.2502 | NA | NA | NA | NA | NA |
| order. Actinomycetales. id. 420               | Stroke              | Wald ratio | 1 | 0.9803 | 0.8091 | 1.1878 | 0.8394 | NA | NA | NA | NA | NA |
| order. Enterobacteriales. id. 3468            | CardioEmbolicStroke | Wald ratio | 1 | 0.9704 | 0.4993 | 1.8860 | 0.9295 | NA | NA | NA | NA | NA |
| order. Enterobacteriales. id. 3468            | IschemicStroke      | Wald ratio | 1 | 1.1028 | 0.8326 | 1.4606 | 0.4951 | NA | NA | NA | NA | NA |
| order. Enterobacteriales. id. 3468            | LargeArteryStroke   | Wald ratio | 1 | 0.9769 | 0.3721 | 2.5646 | 0.9622 | NA | NA | NA | NA | NA |
| order. Enterobacteriales. id. 3468            | SmallVesselStroke   | Wald ratio | 1 | 0.8849 | 0.3767 | 2.0787 | 0.7790 | NA | NA | NA | NA | NA |
| order. Enterobacteriales. id. 3468            | Stroke              | Wald ratio | 1 | 1.0455 | 0.8049 | 1.3578 | 0.7389 | NA | NA | NA | NA | NA |
| order. MollicutesRF9. id. 11579               | CardioEmbolicStroke | Wald ratio | 1 | 1.5414 | 0.9022 | 2.6335 | 0.1133 | NA | NA | NA | NA | NA |
| order. MollicutesRF9. id. 11579               | IschemicStroke      | Wald ratio | 1 | 1.1863 | 0.9369 | 1.5019 | 0.1559 | NA | NA | NA | NA | NA |
| order. MollicutesRF9. id. 11579               | LargeArteryStroke   | Wald ratio | 1 | 1.8137 | 0.8767 | 3.7520 | 0.1084 | NA | NA | NA | NA | NA |
| order. MollicutesRF9. id. 11579               | SmallVesselStroke   | Wald ratio | 1 | 1.7471 | 0.8973 | 3.4017 | 0.1008 | NA | NA | NA | NA | NA |
| order. MollicutesRF9. id. 11579               | Stroke              | Wald ratio | 1 | 1.1690 | 0.9442 | 1.4474 | 0.1519 | NA | NA | NA | NA | NA |
| order. Verrucomicrobiales. id. 4030           | CardioEmbolicStroke | Wald ratio | 1 | 0.4383 | 0.2392 | 0.8030 | 0.0076 | NA | NA | NA | NA | NA |
| order. Verrucomicrobiales. id. 4030           | IschemicStroke      | Wald ratio | 1 | 0.9308 | 0.7229 | 1.1986 | 0.5785 | NA | NA | NA | NA | NA |

|                                  |                     |            |   |        |        |        |        |    |    |    |    |    |
|----------------------------------|---------------------|------------|---|--------|--------|--------|--------|----|----|----|----|----|
| order.Verrucomicrobiales.id.4030 | LargeArteryStroke   | Wald ratio | 1 | 1.2125 | 0.5336 | 2.7553 | 0.6455 | NA | NA | NA | NA | NA |
| order.Verrucomicrobiales.id.4030 | SmallVesselStroke   | Wald ratio | 1 | 1.2537 | 0.6173 | 2.5462 | 0.5316 | NA | NA | NA | NA | NA |
| order.Verrucomicrobiales.id.4030 | Stroke              | Wald ratio | 1 | 0.9249 | 0.7319 | 1.1689 | 0.5135 | NA | NA | NA | NA | NA |
| phylum.Proteobacteria.id.2375    | CardioEmbolicStroke | Wald ratio | 1 | 0.7002 | 0.3610 | 1.3581 | 0.2916 | NA | NA | NA | NA | NA |
| phylum.Proteobacteria.id.2375    | IschemicStroke      | Wald ratio | 1 | 0.9618 | 0.7175 | 1.2894 | 0.7947 | NA | NA | NA | NA | NA |
| phylum.Proteobacteria.id.2375    | LargeArteryStroke   | Wald ratio | 1 | 1.2735 | 0.5264 | 3.0805 | 0.5917 | NA | NA | NA | NA | NA |
| phylum.Proteobacteria.id.2375    | SmallVesselStroke   | Wald ratio | 1 | 1.2425 | 0.5477 | 2.8186 | 0.6033 | NA | NA | NA | NA | NA |
| phylum.Proteobacteria.id.2375    | Stroke              | Wald ratio | 1 | 0.9138 | 0.6955 | 1.2007 | 0.5176 | NA | NA | NA | NA | NA |

Table.S4.positive control for the causality of species Bacteroides pectinophilus to CES

| exposure            | outcome             | method                    | nsnp | b        | se       | pval     | ancestry |
|---------------------|---------------------|---------------------------|------|----------|----------|----------|----------|
| Atrial_fibrillation | CardioEmbolicStroke | MR Egger                  | 75   | 0.784975 | 0.098911 | 1.86E-11 | EAS      |
| Atrial_fibrillation | CardioEmbolicStroke | Weighted median           | 75   | 0.564268 | 0.074663 | 4.11E-14 | EAS      |
| Atrial_fibrillation | CardioEmbolicStroke | Inverse variance weighted | 75   | 0.467754 | 0.047    | 2.47E-23 | EAS      |
| Atrial_fibrillation | CardioEmbolicStroke | Simple mode               | 75   | 0.513546 | 0.162578 | 0.002294 | EAS      |
| Atrial_fibrillation | CardioEmbolicStroke | Weighted mode             | 75   | 0.579525 | 0.076633 | 8.68E-11 | EAS      |

Note: The GWAS summary data for Atrial fibrillation is from(Low, Siew-Kee et al. “Identification of six new genetic loci associated with atrial fibrillation in the Japanese population.” Nature genetics vol. 49,6 (2017): 953–958. doi:10.1038/ng.3842)

Table.S5.Comparison of the causal effect estimates for Species Bacteroides pectinophilus on GIGASTROKE and MEGASTROKE subtypes

| Exposure                          | Outcome             | OR (95%CI)           | Pval      |
|-----------------------------------|---------------------|----------------------|-----------|
| Species Bacteroides pectinophilus | Stroke (GIGASTROKE) | 0. 97 (0. 95–0. 99)  | 0. 0403   |
| Species Bacteroides pectinophilus | AIS (GIGASTROKE)    | 0. 96 (0. 94–0. 98)  | 0. 0051   |
| Species Bacteroides pectinophilus | CES (GIGASTROKE)    | 0. 72 (0. 62–0. 84)  | 4. 22E–05 |
| Species Bacteroides pectinophilus | LAS (GIGASTROKE)    | 0. 98 (0. 88–1. 009) | 0. 7576   |
| Species Bacteroides pectinophilus | SVS (GIGASTROKE)    | 0. 91 (0. 87–0. 96)  | 0. 0004   |
| Species Bacteroides pectinophilus | Stroke (MEGASTROKE) | 0. 98 (0. 96–1. 01)  | 0. 1205   |
| Species Bacteroides pectinophilus | AIS (MEGASTROKE)    | 0. 97 (0. 94–0. 99)  | 0. 0096   |
| Species Bacteroides pectinophilus | CES (MEGASTROKE)    | 0. 99 (0. 93–1. 05)  | 0. 7116   |
| Species Bacteroides pectinophilus | LAS (MEGASTROKE)    | 0. 96 (0. 91–1)      | 0. 0714   |
| Species Bacteroides pectinophilus | SVS (MEGASTROKE)    | 0. 9 (0. 84–0. 97)   | 0. 0041   |

Table.S6.The comparison of the results betweenv our work and Meng’ s positive result

| Causality                   | Meng’ s work          |       | Our work       |                    | comparison            |
|-----------------------------|-----------------------|-------|----------------|--------------------|-----------------------|
|                             | OR(95%CI)             | Pval  | OR(95%CI)      | Pval               |                       |
| Large artery stroke         |                       |       |                |                    |                       |
| Phylum Proteobacteria       | 1. 66 (1. 02–2. 70)   | 0. 04 | 1. 27 (0. 53–  | 0. 57 (Wald Ratio) | direction             |
| Order_Rhodospirillales      | 0. 78 (0. 62–0. 98)   | 0. 03 | 0. 85 (0. 55–  |                    | 0. 46                 |
|                             |                       |       | 1. 32)         |                    |                       |
| Family_Pasteurellaceae      | 1. 34 (1. 05–1. 71)   | 0. 02 | 1. 08 (0. 76–  | 0. 66              | direction             |
|                             |                       |       | 1. 52)         |                    |                       |
| Genus_Tyzzarella3           | 0. 81 (0. 68 – 0. 97) | 0. 02 | /              | /                  | No IVs are selected   |
| Genus_Intestinimonas        | 0. 77 (0. 61 – 0. 98) | 0. 03 | 0. 83 (0. 43–  | 0. 58              | direction             |
|                             |                       |       | 1. 61)         |                    |                       |
| Genus_RuminococcaceaeUCG009 | 0. 73 (0. 56 – 0. 95) | 0. 02 | 0. 91 (0. 60–  | 0. 66              | Direction             |
|                             |                       |       | 1. 38)         |                    |                       |
| Genus_Gordonibacter         | 1. 36 (1. 05 – 1. 76) | 0. 02 | 1. 43 (0. 91–  | 0. 12              | Direction             |
|                             |                       |       | 2. 27)         |                    |                       |
| Genus_Methanobrevibacter    | 0. 70 (0. 54 – 0. 91) | 0. 01 | 0. 89 (0. 61–  | 0. 57              | Wald Ratio, Direction |
|                             |                       |       | 1. 31)         |                    |                       |
| Genus_Fusicatenibacter      | 1. 42 (1. 02 – 1. 97) | 0. 04 | 1. 16 (0. 64–  | 0. 61              | Direction             |
|                             |                       |       | 2. 11)         |                    |                       |
| Small Vessel Stroke         |                       |       |                |                    |                       |
| Class_Bacilli               | 1. 27 (1. 06 – 1. 53) | 0. 01 | 1. 35 (0. 90–  | 0. 14              | Direction             |
|                             |                       |       | 2. 04)         |                    |                       |
| Family_Streptococcaceae     | 1. 26 (1. 00 – 1. 57) | 0. 05 | 0. 78 (0. 58–  | 0. 11              | inconsistent          |
|                             |                       |       | 1. 06)         |                    |                       |
| Genus_Butyrivibrio          | 0. 80 (0. 65 – 0. 99) | 0. 04 | 1. 05 (0. 86–  | 0. 61              | inconsistent          |
|                             |                       |       | 1. 28)         |                    |                       |
| Genus_Intestinimonas        | 0. 85 (0. 73 – 0. 98) | 0. 03 | 1. 32 (0. 90–  | 0. 15              | inconsistent          |
|                             |                       |       | 1. 93)         |                    |                       |
| Genus_CandidatusSoleaferrea | 0. 74 (0. 59 – 0. 92) | 0. 01 | 1. 099 (0. 76– | 0. 6               | inconsistent          |
|                             |                       |       | 1. 58)         |                    |                       |

|                                   |                    |      |                   |       |                           |
|-----------------------------------|--------------------|------|-------------------|-------|---------------------------|
| Genus_Prevotella7                 | 1.23 (1.08 – 1.41) | 0.01 | 1.02 (0.82–1.26)  | 0.86  | Direction                 |
| Genus_Eubacteriumhalliigroup      | 0.79 (0.65 – 0.96) | 0.02 | 0.38 (0.173–0.85) | 0.02  | Direction Pval Wald ratio |
| Genus_Coprobacter                 | 0.71 (0.57 – 0.89) | 0.01 | 0.96 (0.58–1.60)  | 0.87  | Direction                 |
| Genus_LachnospiraceaeNK4A136group | 0.81 (0.66 – 0.99) | 0.04 | 0.28 (0.13–0.62)  | 0.002 | Direction Pval Wald ratio |
| Cardioembolic Stroke              |                    |      |                   |       |                           |
| Class_Bacteroidia                 | 0.60 (0.43 – 0.84) | 0.01 | 0.99 (0.69–1.44)  | 0.98  | Direction                 |
| Class_Deltaproteobacteria         | 0.72 (0.54 – 0.95) | 0.02 | 0.73 (0.52–1.01)  | 0.06  | Direction                 |
| Family_Desulfovibrionaceae        | 0.74 (0.58 – 0.93) | 0.01 | 0.73 (0.53–1.01)  | 0.05  | direction                 |
| Genus_Parasutterella              | 1.27 (1.06 – 1.52) | 0.01 | 0.88 (0.70–1.12)  | 0.29  | inconsistent              |
| Genus_FamilyXIIIAD3011            | 0.73 (0.55 – 0.97) | 0.03 | 1.25 (0.89–1.76)  | 0.19  | Inconsistent              |
| Genus_Parabacteroides             | 1.78 (1.15 – 2.75) | 0.01 | 0.99 (0.52–1.88)  | 0.98  | Inconsistent              |
| Genus_Eubacteriumrectalegroup     | 1.46 (1.01 – 2.09) | 0.04 | 1.34 (0.87–2.06)  | 0.17  | direction                 |
| Genus_Alistipes                   | 1.52 (1.04 – 2.24) | 0.03 | 1.04 (0.50–2.18)  | 0.91  | direction                 |
| Genus_LachnospiraceaeNK4A136group | 0.75 (0.60 – 0.94) | 0.01 | 0.99 (0.53–1.88)  | 0.99  | direction                 |

Table.S7.The results of same IVs selected by Meng and different outcome data(MEGASTROKE and GIGASTROKE)

| Causality                         | MEGASTROKE (Meng' s work) |       | GIGASTROKE          | Pval  |
|-----------------------------------|---------------------------|-------|---------------------|-------|
|                                   | OR (95%CI)                | Pval  | OR (95%CI)          |       |
| Large artery stroke               |                           |       |                     |       |
| Phylum_Proteobacteria             | 1. 66 (1. 02 – 2. 70)     | 0. 04 | 1. 53 (1. 03–2. 27) | 0. 03 |
| Order_Rhodospirillales            | 0. 78 (0. 62 – 0. 98)     | 0. 03 | 0. 85 (0. 7–1. 04)  | 0. 11 |
| Family_Pasteurellaceae            | 1. 34 (1. 05 – 1. 71)     | 0. 02 | 1. 04 (0. 79–1. 39) | 0. 76 |
| Genus_Tyzzerella3                 | 0. 81 (0. 68 – 0. 97)     | 0. 02 | 0. 87 (0. 75–1. 01) | 0. 07 |
| Genus_Intestinimonas              | 0. 77 (0. 61 – 0. 98)     | 0. 03 | 1. 14 (0. 93–1. 39) | 0. 21 |
| Genus_RuminococcaceaeUCG009       | 0. 73 (0. 56 – 0. 95)     | 0. 02 | 0. 8 (0. 65–0. 97)  | 0. 02 |
| Genus_Gordonibacter               | 1. 36 (1. 05 – 1. 76)     | 0. 02 | 1. 24 (0. 92–1. 68) | 0. 15 |
| Genus_Methanobrevibacter          | 0. 70 (0. 54 – 0. 91)     | 0. 01 | 0. 76 (0. 61–0. 95) | 0. 01 |
| Genus_Fusicatenibacter            | 1. 42 (1. 02 – 1. 97)     | 0. 04 | 1. 38 (1. 05–1. 82) | 0. 02 |
| Small Vessel Stroke               |                           |       |                     |       |
| Class_Bacilli                     | 1. 27 (1. 06 – 1. 53)     | 0. 01 | 1. 25 (0. 99–1. 58) | 0. 06 |
| Family_Streptococcaceae           | 1. 26 (1. 00 – 1. 57)     | 0. 05 | 1. 38 (1. 07–1. 79) | 0. 01 |
| Genus_Butyrivibrio                | 0. 80 (0. 65 – 0. 99)     | 0. 04 | 0. 95 (0. 81–1. 12) | 0. 53 |
| Genus_Intestinimonas              | 0. 85 (0. 73 – 0. 98)     | 0. 03 | 1. 03 (0. 86–1. 24) | 0. 75 |
| Genus_CandidatusSoleaferrea       | 0. 74 (0. 59 – 0. 92)     | 0. 01 | 0. 79 (0. 62–1)     | 0. 05 |
| Genus_Prevotella7                 | 1. 23 (1. 08 – 1. 41)     | 0. 01 | 1. 07 (0. 92–1. 25) | 0. 38 |
| Genus_Eubacteriumhalliigroup      | 0. 79 (0. 65 – 0. 96)     | 0. 02 | 0. 99 (0. 65–1. 52) | 0. 98 |
| Genus_Copro bacter                | 0. 71 (0. 57 – 0. 89)     | 0. 01 | 0. 89 (0. 69–1. 16) | 0. 4  |
| Genus_LachnospiraceaeNK4A136group | 0. 81 (0. 66 – 0. 99)     | 0. 04 | 0. 68 (0. 52–0. 9)  | 0. 01 |
| Cardioembolic Stroke              |                           |       |                     |       |
| Class_Bacteroidia                 | 0. 60 (0. 43 – 0. 84)     | 0. 01 | 0. 74 (0. 55–0. 99) | 0. 04 |
| Class_Deltaproteobacteria         | 0. 72 (0. 54 – 0. 95)     | 0. 02 | 0. 78 (0. 63–0. 96) | 0. 02 |
| Family_Desulfovibrionaceae        | 0. 74 (0. 58 – 0. 93)     | 0. 01 | 0. 82 (0. 68–0. 99) | 0. 04 |
| Genus_Parasutterella              | 1. 27 (1. 06 – 1. 52)     | 0. 01 | 1. 24 (1. 08–1. 43) | 0. 01 |
| Genus_FamilyXIIIAD3011            | 0. 73 (0. 55 – 0. 97)     | 0. 03 | 0. 92 (0. 7–1. 2)   | 0. 52 |
| Genus_Parabacteroides             | 1. 78 (1. 15 – 2. 75)     | 0. 01 | 1. 47 (1. 07–2. 01) | 0. 02 |
| Genus_Eubacteriumrectalegroup     | 1. 46 (1. 01 – 2. 09)     | 0. 04 | 1. 08 (0. 79–1. 47) | 0. 64 |

|                                   |                       |       |                     |       |
|-----------------------------------|-----------------------|-------|---------------------|-------|
| Genus_Alistipes                   | 1. 52 (1. 04 – 2. 24) | 0. 03 | 1. 32 (0. 87–2. 01) | 0. 19 |
| Genus_LachnospiraceaeNK4A136group | 0. 75 (0. 60 – 0. 94) | 0. 01 | 0. 76 (0. 64–0. 91) | 0     |

Table.S8.The negative control of our analysis with Meng’s study

| exposure                           | outcome             | Methods                   | Meng OR | Meng pval | Meng Upper 95CI | Meng Lower 95CI | Cheng OR | Cheng Lower 95CI | Cheng Upper 95CI | Cheng pval | Replicated |
|------------------------------------|---------------------|---------------------------|---------|-----------|-----------------|-----------------|----------|------------------|------------------|------------|------------|
| class.Actinobacteria               | CardioEmbolicStroke | Inverse variance weighted | 0.94    | negative  | 1.19            | 0.75            | 1.0502   | 0.7879           | 1.3999           | negative   | YES        |
| class.Bacilli                      | CardioEmbolicStroke | Inverse variance weighted | 0.87    | negative  | 1.14            | 0.66            | 0.8372   | 0.5285           | 1.3262           | negative   | YES        |
| class.Bacteroidia                  | CardioEmbolicStroke | Inverse variance weighted | 0.6     | positive  | 0.84            | 0.43            | 0.997    | 0.6926           | 1.4351           | negative   | NO         |
| class.Betaproteobacteria           | CardioEmbolicStroke | Inverse variance weighted | 0.88    | negative  | 1.14            | 0.67            | 1.0757   | 0.7669           | 1.5088           | negative   | YES        |
| class.Clostridia                   | CardioEmbolicStroke | Inverse variance weighted | 0.96    | negative  | 1.29            | 0.71            | 0.9745   | 0.6427           | 1.4778           | negative   | YES        |
| class.Coriobacteriia               | CardioEmbolicStroke | Inverse variance weighted | 0.93    | negative  | 1.31            | 0.66            | 0.9244   | 0.664            | 1.2868           | negative   | YES        |
| class.Deltaproteobacteria          | CardioEmbolicStroke | Inverse variance weighted | 0.72    | positive  | 0.95            | 0.54            | 0.7268   | 0.5239           | 1.0083           | negative   | NO         |
| class.Erysipelotrichia             | CardioEmbolicStroke | Inverse variance weighted | 0.97    | negative  | 1.31            | 0.72            | 1.4537   | 0.8923           | 2.3683           | negative   | YES        |
| class.Lentisphaeria                | CardioEmbolicStroke | Inverse variance weighted | 0.86    | negative  | 1.01            | 0.73            | 0.9046   | 0.7051           | 1.1605           | negative   | YES        |
| class.Melainibacteria              | CardioEmbolicStroke | Inverse variance weighted | 0.95    | negative  | 1.17            | 0.78            | 0.8963   | 0.6991           | 1.1492           | negative   | YES        |
| class.Methanobacteria              | CardioEmbolicStroke | Inverse variance weighted | 1.06    | negative  | 1.25            | 0.9             | 1.0608   | 0.89             | 1.2643           | negative   | YES        |
| class.Mollicutes                   | CardioEmbolicStroke | Inverse variance weighted | 1.04    | negative  | 1.3             | 0.84            | 1.0704   | 0.5843           | 1.9611           | negative   | YES        |
| class.Negativicutes                | CardioEmbolicStroke | Inverse variance weighted | 0.85    | negative  | 1.12            | 0.65            | 0.8361   | 0.2518           | 2.7769           | negative   | YES        |
| family.Acidaminococcaceae          | CardioEmbolicStroke | Inverse variance weighted | 1.09    | negative  | 1.48            | 0.8             | 1.1108   | 0.7908           | 1.5603           | negative   | YES        |
| family.Alcaligenaceae              | CardioEmbolicStroke | Inverse variance weighted | 0.87    | negative  | 1.23            | 0.62            | 0.7412   | 0.4913           | 1.1183           | negative   | YES        |
| family.Bifidobacteriaceae          | CardioEmbolicStroke | Inverse variance weighted | 1.01    | negative  | 1.61            | 0.64            | 0.8163   | 0.6073           | 1.0973           | negative   | YES        |
| family.Clostridiaceae1             | CardioEmbolicStroke | Inverse variance weighted | 0.87    | negative  | 1.34            | 0.57            | 0.9784   | 0.673            | 1.4224           | negative   | YES        |
| family.ClostridialesvadinBB60group | CardioEmbolicStroke | Inverse variance weighted | 1.11    | negative  | 1.32            | 0.92            | 1.1571   | 0.8657           | 1.5465           | negative   | YES        |
| family.Coriobacteriaceae           | CardioEmbolicStroke | Inverse variance weighted | 0.93    | negative  | 1.31            | 0.66            | 0.9244   | 0.664            | 1.2868           | negative   | YES        |
| family.Defluviitaleaceae           | CardioEmbolicStroke | Inverse variance weighted | 1.01    | negative  | 1.22            | 0.84            | 0.9617   | 0.7039           | 1.3141           | negative   | YES        |
| family.Desulfovibrionaceae         | CardioEmbolicStroke | Inverse variance weighted | 0.74    | positive  | 0.93            | 0.58            | 0.7274   | 0.5263           | 1.0054           | negative   | NO         |
| family.Erysipelotrichaceae         | CardioEmbolicStroke | Inverse variance weighted | 0.97    | negative  | 1.31            | 0.72            | 1.4537   | 0.8923           | 2.3683           | negative   | YES        |
| family.FamilyXI                    | CardioEmbolicStroke | Inverse variance weighted | 1.03    | negative  | 1.17            | 0.92            | 0.8718   | 0.6712           | 1.1322           | negative   | YES        |
| family.Methanobacteriaceae         | CardioEmbolicStroke | Inverse variance weighted | 1.06    | negative  | 1.25            | 0.9             | 1.0608   | 0.89             | 1.2643           | negative   | YES        |
| family.Pasteurellaceae             | CardioEmbolicStroke | Inverse variance weighted | 1.09    | negative  | 1.34            | 0.89            | 1.2067   | 0.9864           | 1.4762           | negative   | YES        |
| family.Peptococcaceae              | CardioEmbolicStroke | Inverse variance weighted | 0.87    | negative  | 1.04            | 0.72            | 0.9405   | 0.7842           | 1.1279           | negative   | YES        |
| family.Peptostreptococcaceae       | CardioEmbolicStroke | Inverse variance weighted | 1.1     | negative  | 1.35            | 0.9             | 1.0515   | 0.8282           | 1.3349           | negative   | YES        |
| family.Prevotellaceae              | CardioEmbolicStroke | Inverse variance weighted | 1       | negative  | 1.27            | 0.79            | 1.0841   | 0.613            | 1.9174           | negative   | YES        |
| family.Rhodospirillaceae           | CardioEmbolicStroke | Inverse variance weighted | 1.02    | negative  | 1.33            | 0.79            | 0.793    | 0.6111           | 1.0292           | negative   | YES        |
| family.Rikenellaceae               | CardioEmbolicStroke | Inverse variance weighted | 0.94    | negative  | 1.3             | 0.68            | 1.1496   | 0.8532           | 1.549            | negative   | YES        |
| family.Ruminococcaceae             | CardioEmbolicStroke | Inverse variance weighted | 0.93    | negative  | 1.25            | 0.69            | 1.7855   | 0.8728           | 3.6528           | negative   | YES        |
| family.Streptococcaceae            | CardioEmbolicStroke | Inverse variance weighted | 1.19    | negative  | 1.53            | 0.92            | 1.2144   | 0.9246           | 1.595            | negative   | YES        |
| family.Victivallaceae              | CardioEmbolicStroke | Inverse variance weighted | 0.99    | negative  | 1.12            | 0.87            | 1.0621   | 0.9024           | 1.2501           | negative   | YES        |
| genus.Adlercreutzia                | CardioEmbolicStroke | Inverse variance weighted | 0.99    | negative  | 1.28            | 0.76            | 0.6801   | 0.4159           | 1.1123           | negative   | YES        |
| genus.Allisonella                  | CardioEmbolicStroke | Inverse variance weighted | 1.12    | negative  | 1.41            | 0.89            | 1.0801   | 0.8833           | 1.3207           | negative   | YES        |
| genus.Bifidobacterium              | CardioEmbolicStroke | Inverse variance weighted | 0.85    | negative  | 1.09            | 0.66            | 0.8163   | 0.6056           | 1.1003           | negative   | YES        |
| genus.Bilophila                    | CardioEmbolicStroke | Inverse variance weighted | 0.96    | negative  | 1.26            | 0.74            | 1.0203   | 0.7052           | 1.4763           | negative   | YES        |
| genus.Blautia                      | CardioEmbolicStroke | Inverse variance weighted | 1.02    | negative  | 1.62            | 0.64            | 1.0039   | 0.7546           | 1.3356           | negative   | YES        |
| genus.Butyricimonas                | CardioEmbolicStroke | Inverse variance weighted | 0.99    | negative  | 1.24            | 0.79            | 1.0503   | 0.7972           | 1.3838           | negative   | YES        |
| genus.Butyrvibrio                  | CardioEmbolicStroke | Inverse variance weighted | 1.04    | negative  | 1.19            | 0.91            | 1.158    | 0.9873           | 1.3582           | negative   | YES        |
| genus.CandidatusSoleaferrea        | CardioEmbolicStroke | Inverse variance weighted | 0.86    | negative  | 1.19            | 0.63            | 0.8598   | 0.6408           | 1.1537           | negative   | YES        |
| genus.Catenibacterium              | CardioEmbolicStroke | Inverse variance weighted | 1.13    | negative  | 1.34            | 0.96            | 1.1758   | 0.8728           | 1.5841           | negative   | YES        |
| genus.Clostridiumsensustrictol     | CardioEmbolicStroke | Inverse variance weighted | 0.94    | negative  | 1.21            | 0.73            | 1.1253   | 0.791            | 1.6008           | negative   | YES        |
| genus.Collinsella                  | CardioEmbolicStroke | Inverse variance weighted | 1.09    | negative  | 1.67            | 0.72            | 0.8551   | 0.5747           | 1.2723           | negative   | YES        |
| genus.DefluviitaleaceaeUCG011      | CardioEmbolicStroke | Inverse variance weighted | 1.01    | negative  | 1.21            | 0.84            | 0.9611   | 0.6998           | 1.32             | negative   | YES        |
| genus.Dialister                    | CardioEmbolicStroke | Inverse variance weighted | 0.91    | negative  | 1.38            | 0.59            | 0.9021   | 0.6368           | 1.2778           | negative   | YES        |
| genus.Eggerthella                  | CardioEmbolicStroke | Inverse variance weighted | 1.04    | negative  | 1.26            | 0.86            | 1.0152   | 0.8226           | 1.253            | negative   | YES        |
| genus.Eisenbergiella               | CardioEmbolicStroke | Inverse variance weighted | 0.95    | negative  | 1.15            | 0.78            | 1.0944   | 0.8836           | 1.3554           | negative   | YES        |
| genus.Enterorhabdus                | CardioEmbolicStroke | Inverse variance weighted | 1.13    | negative  | 1.45            | 0.89            | 1.005    | 0.594            | 1.7006           | negative   | YES        |
| genus.ErysipelotrichaceaeUCG003    | CardioEmbolicStroke | Inverse variance weighted | 0.97    | negative  | 1.21            | 0.78            | 0.8399   | 0.5999           | 1.1759           | negative   | YES        |
| genus.Faecalibacterium             | CardioEmbolicStroke | Inverse variance weighted | 1.24    | negative  | 1.71            | 0.9             | 1.2532   | 0.8268           | 1.8996           | negative   | YES        |
| genus.Fusicatenibacter             | CardioEmbolicStroke | Inverse variance weighted | 0.86    | negative  | 1.1             | 0.66            | 0.9229   | 0.6874           | 1.2393           | negative   | YES        |
| genus.Haemophilus                  | CardioEmbolicStroke | Inverse variance weighted | 1.08    | negative  | 1.27            | 0.92            | 1.1684   | 0.963            | 1.4178           | negative   | YES        |

|                                   |                     |                           |      |          |      |      |        |        |        |          |     |
|-----------------------------------|---------------------|---------------------------|------|----------|------|------|--------|--------|--------|----------|-----|
| genus. Howardella                 | CardioEmbolicStroke | Inverse variance weighted | 0.91 | negative | 1.04 | 0.79 | 0.8604 | 0.7232 | 1.0236 | negative | YES |
| genus. Hungatella                 | CardioEmbolicStroke | Inverse variance weighted | 1.23 | negative | 2.05 | 0.74 | 1.124  | 0.7494 | 1.686  | negative | YES |
| genus. Intestiniibacter           | CardioEmbolicStroke | Inverse variance weighted | 0.94 | negative | 1.18 | 0.75 | 0.9033 | 0.6134 | 1.3303 | negative | YES |
| genus. Intestinimonas             | CardioEmbolicStroke | Inverse variance weighted | 1.04 | negative | 1.31 | 0.82 | 1.0658 | 0.7338 | 1.5481 | negative | YES |
| genus. LachnospiraceaeFCS020group | CardioEmbolicStroke | Inverse variance weighted | 1.02 | negative | 1.29 | 0.81 | 0.9158 | 0.7019 | 1.1949 | negative | YES |
| genus. LachnospiraceaeNC2004group | CardioEmbolicStroke | Inverse variance weighted | 0.89 | negative | 1.14 | 0.7  | 0.9056 | 0.6992 | 1.173  | negative | YES |
| genus. LachnospiraceaeUCG001      | CardioEmbolicStroke | Inverse variance weighted | 0.94 | negative | 1.17 | 0.76 | 1.0279 | 0.7967 | 1.3261 | negative | YES |
| genus. LachnospiraceaeUCG004      | CardioEmbolicStroke | Inverse variance weighted | 0.84 | negative | 1.09 | 0.65 | 0.933  | 0.7102 | 1.2258 | negative | YES |
| genus. LachnospiraceaeUCG008      | CardioEmbolicStroke | Inverse variance weighted | 1    | negative | 1.25 | 0.81 | 1.2355 | 0.9616 | 1.5875 | negative | YES |
| genus. LachnospiraceaeUCG010      | CardioEmbolicStroke | Inverse variance weighted | 1.1  | negative | 1.5  | 0.81 | 1.1898 | 0.5322 | 2.6597 | negative | YES |
| genus. Lactobacillus              | CardioEmbolicStroke | Inverse variance weighted | 0.91 | negative | 1.09 | 0.76 | 0.767  | 0.5891 | 0.9985 | positive | NO  |
| genus. Lactococcus                | CardioEmbolicStroke | Inverse variance weighted | 1.01 | negative | 1.23 | 0.83 | 0.8861 | 0.7351 | 1.0681 | negative | YES |
| genus. Marvinbryantia             | CardioEmbolicStroke | Inverse variance weighted | 0.91 | negative | 1.22 | 0.68 | 0.7569 | 0.4909 | 1.167  | negative | YES |
| genus. Odoribacter                | CardioEmbolicStroke | Inverse variance weighted | 1.01 | negative | 1.51 | 0.68 | 0.8521 | 0.5641 | 1.287  | negative | YES |
| genus. Olsenella                  | CardioEmbolicStroke | Inverse variance weighted | 1.06 | negative | 1.22 | 0.92 | 1.0043 | 0.7987 | 1.2627 | negative | YES |
| genus. Oscillibacter              | CardioEmbolicStroke | Inverse variance weighted | 1.14 | negative | 1.33 | 0.98 | 1.3237 | 1.0329 | 1.6963 | positive | NO  |
| genus. Oscillospira               | CardioEmbolicStroke | Inverse variance weighted | 1.28 | negative | 2.31 | 0.7  | 0.935  | 0.6298 | 1.3881 | negative | YES |
| genus. Oxalobacter                | CardioEmbolicStroke | Inverse variance weighted | 1.05 | negative | 1.2  | 0.92 | 0.9592 | 0.8403 | 1.0949 | negative | YES |
| genus. Paraprevotella             | CardioEmbolicStroke | Inverse variance weighted | 1.05 | negative | 1.22 | 0.89 | 0.8851 | 0.6603 | 1.1866 | negative | YES |
| genus. Parasutterella             | CardioEmbolicStroke | Inverse variance weighted | 1.27 | positive | 1.52 | 1.06 | 0.8813 | 0.6965 | 1.1151 | negative | NO  |
| genus. Peptococcus                | CardioEmbolicStroke | Inverse variance weighted | 0.96 | negative | 1.12 | 0.82 | 0.971  | 0.8356 | 1.1284 | negative | YES |
| genus. Prevotella7                | CardioEmbolicStroke | Inverse variance weighted | 1.04 | negative | 1.37 | 0.79 | 0.9726 | 0.8119 | 1.1651 | negative | YES |
| genus. RikenellaceaeRC9gutgroup   | CardioEmbolicStroke | Inverse variance weighted | 1.11 | negative | 1.28 | 0.96 | 1.0871 | 0.8995 | 1.3137 | negative | YES |
| genus. Romboutsia                 | CardioEmbolicStroke | Inverse variance weighted | 1.18 | negative | 1.95 | 0.72 | 1.1385 | 0.7853 | 1.6505 | negative | YES |
| genus. Ruminiclostridium5         | CardioEmbolicStroke | Inverse variance weighted | 1.01 | negative | 1.38 | 0.75 | 0.8763 | 0.6633 | 1.1577 | negative | YES |
| genus. Ruminiclostridium6         | CardioEmbolicStroke | Inverse variance weighted | 0.92 | negative | 1.17 | 0.72 | 0.9902 | 0.7569 | 1.2953 | negative | YES |
| genus. Ruminiclostridium9         | CardioEmbolicStroke | Inverse variance weighted | 1.05 | negative | 1.66 | 0.67 | 1.0358 | 0.6462 | 1.6603 | negative | YES |
| genus. RuminococcaceaeUCG002      | CardioEmbolicStroke | Inverse variance weighted | 0.88 | negative | 1.11 | 0.7  | 0.9248 | 0.7128 | 1.1998 | negative | YES |
| genus. RuminococcaceaeUCG003      | CardioEmbolicStroke | Inverse variance weighted | 1.04 | negative | 1.34 | 0.81 | 0.8963 | 0.5997 | 1.3397 | negative | YES |
| genus. RuminococcaceaeUCG004      | CardioEmbolicStroke | Inverse variance weighted | 1.07 | negative | 1.43 | 0.8  | 0.94   | 0.6921 | 1.2767 | negative | YES |
| genus. RuminococcaceaeUCG005      | CardioEmbolicStroke | Inverse variance weighted | 1.17 | negative | 1.56 | 0.87 | 0.9456 | 0.7167 | 1.2476 | negative | YES |
| genus. RuminococcaceaeUCG009      | CardioEmbolicStroke | Inverse variance weighted | 1.05 | negative | 1.53 | 0.71 | 1.1253 | 0.7558 | 1.6753 | negative | YES |
| genus. Streptococcus              | CardioEmbolicStroke | Inverse variance weighted | 1.13 | negative | 1.44 | 0.89 | 1.1252 | 0.8974 | 1.4109 | negative | YES |
| genus. Turicibacter               | CardioEmbolicStroke | Inverse variance weighted | 1.09 | negative | 1.36 | 0.88 | 1.4757 | 1.1271 | 1.932  | positive | NO  |
| order. Bacteroidales              | CardioEmbolicStroke | Inverse variance weighted | 0.9  | negative | 1.05 | 0.77 | 0.997  | 0.6926 | 1.4351 | negative | YES |
| order. Bifidobacteriales          | CardioEmbolicStroke | Inverse variance weighted | 1.01 | negative | 1.61 | 0.64 | 0.8163 | 0.6073 | 1.0973 | negative | YES |
| order. Burkholderiales            | CardioEmbolicStroke | Inverse variance weighted | 0.92 | negative | 1.21 | 0.7  | 0.9286 | 0.6717 | 1.2836 | negative | YES |
| order. Clostridiales              | CardioEmbolicStroke | Inverse variance weighted | 0.96 | negative | 1.29 | 0.72 | 0.975  | 0.6423 | 1.48   | negative | YES |
| order. Coriobacteriales           | CardioEmbolicStroke | Inverse variance weighted | 0.93 | negative | 1.31 | 0.66 | 0.9244 | 0.664  | 1.2868 | negative | YES |
| order. Erysipelotrichales         | CardioEmbolicStroke | Inverse variance weighted | 0.97 | negative | 1.31 | 0.72 | 1.4537 | 0.8923 | 2.3683 | negative | YES |
| order. Gastranaerophilales        | CardioEmbolicStroke | Inverse variance weighted | 0.95 | negative | 1.17 | 0.78 | 0.8963 | 0.6992 | 1.149  | negative | YES |
| order. Lactobacillales            | CardioEmbolicStroke | Inverse variance weighted | 0.95 | negative | 1.2  | 0.75 | 1.0255 | 0.7121 | 1.4767 | negative | YES |
| order. Methanobacteriales         | CardioEmbolicStroke | Inverse variance weighted | 1.06 | negative | 1.25 | 0.9  | 1.0608 | 0.89   | 1.2643 | negative | YES |
| order. NB1n                       | CardioEmbolicStroke | Inverse variance weighted | 1.04 | negative | 1.2  | 0.91 | 1.0365 | 0.8771 | 1.2249 | negative | YES |
| order. Pasteurellales             | CardioEmbolicStroke | Inverse variance weighted | 1.09 | negative | 1.34 | 0.89 | 1.2067 | 0.9864 | 1.4762 | negative | YES |
| order. Rhodospirillales           | CardioEmbolicStroke | Inverse variance weighted | 1.11 | negative | 1.33 | 0.93 | 0.9913 | 0.7131 | 1.378  | negative | YES |
| order. Selenomonadales            | CardioEmbolicStroke | Inverse variance weighted | 0.85 | negative | 1.12 | 0.65 | 0.8361 | 0.2518 | 2.7769 | negative | YES |
| order. Victivallales              | CardioEmbolicStroke | Inverse variance weighted | 0.86 | negative | 1.01 | 0.73 | 0.9046 | 0.7051 | 1.1605 | negative | YES |
| phylum. Actinobacteria            | CardioEmbolicStroke | Inverse variance weighted | 0.92 | negative | 1.16 | 0.72 | 1.1223 | 0.8621 | 1.4609 | negative | YES |
| phylum. Bacteroidetes             | CardioEmbolicStroke | Inverse variance weighted | 0.77 | negative | 1.14 | 0.52 | 0.9992 | 0.6994 | 1.4274 | negative | YES |
| phylum. Cyanobacteria             | CardioEmbolicStroke | Inverse variance weighted | 0.87 | negative | 1.09 | 0.7  | 0.8606 | 0.696  | 1.0643 | negative | YES |
| phylum. Euryarchaeota             | CardioEmbolicStroke | Inverse variance weighted | 1.04 | negative | 1.22 | 0.89 | 1.1139 | 0.8912 | 1.3923 | negative | YES |
| phylum. Firmicutes                | CardioEmbolicStroke | Inverse variance weighted | 1.33 | negative | 1.93 | 0.92 | 1.119  | 0.5596 | 2.2375 | negative | YES |
| phylum. Lentisphaerae             | CardioEmbolicStroke | Inverse variance weighted | 0.85 | negative | 1.01 | 0.72 | 0.9067 | 0.7081 | 1.1611 | negative | YES |
| phylum. Tenericutes               | CardioEmbolicStroke | Inverse variance weighted | 1.04 | negative | 1.3  | 0.84 | 1.0704 | 0.5843 | 1.9611 | negative | YES |
| phylum. Verrucomicrobia           | CardioEmbolicStroke | Inverse variance weighted | 1.07 | negative | 1.33 | 0.86 | 0.8952 | 0.6134 | 1.3063 | negative | YES |

|                                     |                   |                           |      |          |      |      |        |        |        |          |     |
|-------------------------------------|-------------------|---------------------------|------|----------|------|------|--------|--------|--------|----------|-----|
| class. Actinobacteria               | LargeArteryStroke | Inverse variance weighted | 1.04 | negative | 1.49 | 0.72 | 0.911  | 0.6395 | 1.2977 | negative | YES |
| class. Bacilli                      | LargeArteryStroke | Inverse variance weighted | 0.87 | negative | 1.17 | 0.65 | 0.6688 | 0.4382 | 1.0206 | negative | YES |
| class. Bacteroidia                  | LargeArteryStroke | Inverse variance weighted | 1.26 | negative | 2.01 | 0.79 | 1.0195 | 0.4896 | 2.1229 | negative | YES |
| class. Betaproteobacteria           | LargeArteryStroke | Inverse variance weighted | 1.14 | negative | 1.6  | 0.81 | 0.8208 | 0.5066 | 1.3298 | negative | YES |
| class. Clostridia                   | LargeArteryStroke | Inverse variance weighted | 1.3  | negative | 1.91 | 0.89 | 1      | 0.6112 | 1.6361 | negative | YES |
| class. Coriobacteriia               | LargeArteryStroke | Inverse variance weighted | 1.41 | negative | 2.28 | 0.88 | 1.0936 | 0.6956 | 1.7193 | negative | YES |
| class. Deltaproteobacteria          | LargeArteryStroke | Inverse variance weighted | 0.98 | negative | 1.43 | 0.68 | 1.0202 | 0.6567 | 1.585  | negative | YES |
| class. Erysipelotrichia             | LargeArteryStroke | Inverse variance weighted | 0.79 | negative | 1.15 | 0.54 | 0.8776 | 0.4018 | 1.9169 | negative | YES |
| class. Lentisphaeria                | LargeArteryStroke | Inverse variance weighted | 1.11 | negative | 1.35 | 0.91 | 1.1046 | 0.7876 | 1.5491 | negative | YES |
| class. Melainabacteria              | LargeArteryStroke | Inverse variance weighted | 0.86 | negative | 1.19 | 0.62 | 0.9345 | 0.5165 | 1.6909 | negative | YES |
| class. Mollicutes                   | LargeArteryStroke | Inverse variance weighted | 0.89 | negative | 1.21 | 0.65 | 0.8008 | 0.4972 | 1.2899 | negative | YES |
| class. Negativicutes                | LargeArteryStroke | Inverse variance weighted | 0.74 | negative | 1.19 | 0.46 | 0.4603 | 0.2477 | 0.8556 | positive | NO  |
| family. Acidaminococcaceae          | LargeArteryStroke | Inverse variance weighted | 1.04 | negative | 1.54 | 0.7  | 1.0902 | 0.6937 | 1.7133 | negative | YES |
| family. Alcaligenaceae              | LargeArteryStroke | Inverse variance weighted | 1.25 | negative | 1.78 | 0.88 | 1.1167 | 0.7009 | 1.7791 | negative | YES |
| family. Bifidobacteriaceae          | LargeArteryStroke | Inverse variance weighted | 1.12 | negative | 1.54 | 0.81 | 0.9702 | 0.563  | 1.672  | negative | YES |
| family. Clostridiaceae1             | LargeArteryStroke | Inverse variance weighted | 0.64 | negative | 1.13 | 0.37 | 1.0272 | 0.5287 | 1.9957 | negative | YES |
| family. ClostridialesvadinBB60group | LargeArteryStroke | Inverse variance weighted | 0.92 | negative | 1.15 | 0.73 | 0.9902 | 0.6733 | 1.4563 | negative | YES |
| family. Coriobacteriaceae           | LargeArteryStroke | Inverse variance weighted | 1.41 | negative | 2.28 | 0.88 | 1.0936 | 0.6956 | 1.7193 | negative | YES |
| family. Defluviitaleaceae           | LargeArteryStroke | Inverse variance weighted | 0.97 | negative | 1.31 | 0.71 | 0.7586 | 0.4332 | 1.3286 | negative | YES |
| family. Desulfovibrionaceae         | LargeArteryStroke | Inverse variance weighted | 1.01 | negative | 1.38 | 0.73 | 1.0155 | 0.6554 | 1.5735 | negative | YES |
| family. Erysipelotrichaceae         | LargeArteryStroke | Inverse variance weighted | 0.79 | negative | 1.15 | 0.54 | 0.8776 | 0.4018 | 1.9169 | negative | YES |
| family. FamilyXI                    | LargeArteryStroke | Inverse variance weighted | 0.9  | negative | 1.06 | 0.77 | 1.085  | 0.6821 | 1.7258 | negative | YES |
| family. Peptococcaceae              | LargeArteryStroke | Inverse variance weighted | 1.01 | negative | 1.37 | 0.75 | 1.1001 | 0.7461 | 1.6222 | negative | YES |
| family. Peptostreptococcaceae       | LargeArteryStroke | Inverse variance weighted | 1.12 | negative | 1.46 | 0.85 | 1.1225 | 0.8125 | 1.5507 | negative | YES |
| family. Prevotellaceae              | LargeArteryStroke | Inverse variance weighted | 0.94 | negative | 1.24 | 0.71 | 0.6351 | 0.3668 | 1.0999 | negative | YES |
| family. Rhodospirillaceae           | LargeArteryStroke | Inverse variance weighted | 0.82 | negative | 1.06 | 0.63 | 1.0394 | 0.7311 | 1.4777 | negative | YES |
| family. Rikenellaceae               | LargeArteryStroke | Inverse variance weighted | 1.38 | negative | 2.04 | 0.94 | 1.2209 | 0.6526 | 2.2844 | negative | YES |
| family. Ruminococcaceae             | LargeArteryStroke | Inverse variance weighted | 1.19 | negative | 1.98 | 0.71 | 1.3716 | 0.7184 | 2.6185 | negative | YES |
| family. Streptococcaceae            | LargeArteryStroke | Inverse variance weighted | 0.91 | negative | 1.31 | 0.63 | 0.8441 | 0.6192 | 1.1507 | negative | YES |
| family. Victivallaceae              | LargeArteryStroke | Inverse variance weighted | 0.97 | negative | 1.13 | 0.83 | 0.9645 | 0.7464 | 1.2464 | negative | YES |
| genus. Adlercreutzia                | LargeArteryStroke | Inverse variance weighted | 1.06 | negative | 1.51 | 0.75 | 1.31   | 0.793  | 2.1641 | negative | YES |
| genus. Allisonella                  | LargeArteryStroke | Inverse variance weighted | 0.93 | negative | 1.14 | 0.76 | 0.9656 | 0.7167 | 1.3011 | negative | YES |
| genus. Bifidobacterium              | LargeArteryStroke | Inverse variance weighted | 1.35 | negative | 1.87 | 0.98 | 0.9741 | 0.562  | 1.6883 | negative | YES |
| genus. Bilophila                    | LargeArteryStroke | Inverse variance weighted | 0.86 | negative | 1.23 | 0.6  | 0.7514 | 0.4121 | 1.3703 | negative | YES |
| genus. Blautia                      | LargeArteryStroke | Inverse variance weighted | 1.38 | negative | 2.1  | 0.9  | 1.0598 | 0.3412 | 3.2924 | negative | YES |
| genus. Butyriconas                  | LargeArteryStroke | Inverse variance weighted | 1.24 | negative | 1.62 | 0.95 | 1.4091 | 0.9764 | 2.0334 | negative | YES |
| genus. Butyrivibrio                 | LargeArteryStroke | Inverse variance weighted | 0.9  | negative | 1.07 | 0.76 | 0.9679 | 0.7258 | 1.2908 | negative | YES |
| genus. CandidatusSoleaferrea        | LargeArteryStroke | Inverse variance weighted | 0.89 | negative | 1.25 | 0.64 | 0.8672 | 0.5216 | 1.4417 | negative | YES |
| genus. Catenibacterium              | LargeArteryStroke | Inverse variance weighted | 1.16 | negative | 1.43 | 0.94 | 1.0738 | 0.8339 | 1.3827 | negative | YES |
| genus. Collinsella                  | LargeArteryStroke | Inverse variance weighted | 0.71 | negative | 1.22 | 0.42 | 1.0545 | 0.6197 | 1.7944 | negative | YES |
| genus. DefluviitaleaceaeUCG011      | LargeArteryStroke | Inverse variance weighted | 0.91 | negative | 1.24 | 0.67 | 0.7551 | 0.4273 | 1.3343 | negative | YES |
| genus. Dialister                    | LargeArteryStroke | Inverse variance weighted | 0.86 | negative | 1.5  | 0.5  | 1.0544 | 0.6807 | 1.6332 | negative | YES |
| genus. Eggerthella                  | LargeArteryStroke | Inverse variance weighted | 1.08 | negative | 1.38 | 0.85 | 0.922  | 0.6069 | 1.4007 | negative | YES |
| genus. Eisenbergiella               | LargeArteryStroke | Inverse variance weighted | 1.06 | negative | 1.52 | 0.74 | 0.9766 | 0.6341 | 1.5039 | negative | YES |
| genus. Enterorhabdus                | LargeArteryStroke | Inverse variance weighted | 1.12 | negative | 1.54 | 0.82 | 0.598  | 0.3951 | 0.9051 | positive | NO  |
| genus. ErysipelotrichaceaeUCG003    | LargeArteryStroke | Inverse variance weighted | 0.98 | negative | 1.36 | 0.7  | 0.6256 | 0.4006 | 0.9769 | positive | NO  |
| genus. Faecalibacterium             | LargeArteryStroke | Inverse variance weighted | 1.3  | negative | 1.93 | 0.87 | 1.8144 | 0.8094 | 4.067  | negative | YES |
| genus. Haemophilus                  | LargeArteryStroke | Inverse variance weighted | 1.13 | negative | 1.53 | 0.84 | 0.9069 | 0.6969 | 1.1802 | negative | YES |
| genus. Howardella                   | LargeArteryStroke | Inverse variance weighted | 0.84 | negative | 1.02 | 0.69 | 0.9921 | 0.6402 | 1.5373 | negative | YES |
| genus. Hungatella                   | LargeArteryStroke | Inverse variance weighted | 1.02 | negative | 1.47 | 0.7  | 0.9615 | 0.6897 | 1.3405 | negative | YES |
| genus. Intestinibacter              | LargeArteryStroke | Inverse variance weighted | 0.97 | negative | 1.36 | 0.69 | 0.9409 | 0.5619 | 1.5755 | negative | YES |
| genus. LachnospiraceaeFCS020group   | LargeArteryStroke | Inverse variance weighted | 0.9  | negative | 1.3  | 0.62 | 0.7054 | 0.4951 | 1.005  | negative | YES |
| genus. LachnospiraceaeNC2004group   | LargeArteryStroke | Inverse variance weighted | 1.1  | negative | 1.53 | 0.79 | 1.3965 | 0.9801 | 1.9898 | negative | YES |
| genus. LachnospiraceaeUCG001        | LargeArteryStroke | Inverse variance weighted | 0.84 | negative | 1.17 | 0.6  | 0.7764 | 0.5277 | 1.1423 | negative | YES |
| genus. LachnospiraceaeUCG004        | LargeArteryStroke | Inverse variance weighted | 1.31 | negative | 1.91 | 0.9  | 1.1803 | 0.8202 | 1.6985 | negative | YES |
| genus. LachnospiraceaeUCG008        | LargeArteryStroke | Inverse variance weighted | 1.1  | negative | 1.36 | 0.89 | 1.1325 | 0.8218 | 1.5606 | negative | YES |

|                                 |                   |                           |      |          |      |      |        |        |        |          |     |
|---------------------------------|-------------------|---------------------------|------|----------|------|------|--------|--------|--------|----------|-----|
| genus. LachnospiraceaeUCG010    | LargeArteryStroke | Inverse variance weighted | 0.77 | negative | 1.4  | 0.42 | 1.4206 | 0.9579 | 2.1069 | negative | YES |
| genus. Lactobacillus            | LargeArteryStroke | Inverse variance weighted | 1.02 | negative | 1.29 | 0.81 | 0.9073 | 0.5362 | 1.5352 | negative | YES |
| genus. Lactococcus              | LargeArteryStroke | Inverse variance weighted | 0.97 | negative | 1.18 | 0.8  | 0.9113 | 0.709  | 1.1714 | negative | YES |
| genus. Marvinbryantia           | LargeArteryStroke | Inverse variance weighted | 0.8  | negative | 1.2  | 0.53 | 0.8527 | 0.3411 | 2.1316 | negative | YES |
| genus. Odoribacter              | LargeArteryStroke | Inverse variance weighted | 0.84 | negative | 1.41 | 0.5  | 0.6902 | 0.322  | 1.4796 | negative | YES |
| genus. Olsenella                | LargeArteryStroke | Inverse variance weighted | 0.97 | negative | 1.19 | 0.79 | 1.3906 | 1.0077 | 1.919  | positive | NO  |
| genus. Oscillibacter            | LargeArteryStroke | Inverse variance weighted | 0.96 | negative | 1.18 | 0.78 | 1.0501 | 0.7623 | 1.4465 | negative | YES |
| genus. Oscillospira             | LargeArteryStroke | Inverse variance weighted | 1.23 | negative | 2.77 | 0.55 | 0.89   | 0.3715 | 2.1322 | negative | YES |
| genus. Oxalobacter              | LargeArteryStroke | Inverse variance weighted | 1.13 | negative | 1.36 | 0.93 | 0.9833 | 0.7894 | 1.2247 | negative | YES |
| genus. Paraprevotella           | LargeArteryStroke | Inverse variance weighted | 1.01 | negative | 1.28 | 0.8  | 1.1438 | 0.728  | 1.7973 | negative | YES |
| genus. Parasutterella           | LargeArteryStroke | Inverse variance weighted | 1.2  | negative | 1.52 | 0.95 | 1.5257 | 1.0528 | 2.211  | positive | NO  |
| genus. Peptococcus              | LargeArteryStroke | Inverse variance weighted | 1.05 | negative | 1.28 | 0.86 | 0.9802 | 0.8    | 1.2011 | negative | YES |
| genus. Prevotella7              | LargeArteryStroke | Inverse variance weighted | 1.03 | negative | 1.25 | 0.85 | 0.9148 | 0.6397 | 1.3083 | negative | YES |
| genus. RikenellaceaeRC9gutgroup | LargeArteryStroke | Inverse variance weighted | 0.92 | negative | 1.18 | 0.72 | 0.9118 | 0.7497 | 1.109  | negative | YES |
| genus. Romboutsia               | LargeArteryStroke | Inverse variance weighted | 0.91 | negative | 1.47 | 0.57 | 0.8136 | 0.4952 | 1.3366 | negative | YES |
| genus. Ruminiclostridium5       | LargeArteryStroke | Inverse variance weighted | 1.1  | negative | 1.83 | 0.66 | 0.9579 | 0.6566 | 1.3974 | negative | YES |
| genus. Ruminiclostridium6       | LargeArteryStroke | Inverse variance weighted | 0.9  | negative | 1.19 | 0.67 | 0.8456 | 0.5914 | 1.2091 | negative | YES |
| genus. Ruminiclostridium9       | LargeArteryStroke | Inverse variance weighted | 0.95 | negative | 1.46 | 0.61 | 0.9298 | 0.5092 | 1.6979 | negative | YES |
| genus. RuminococcaceaeUCG002    | LargeArteryStroke | Inverse variance weighted | 1.16 | negative | 1.64 | 0.82 | 0.814  | 0.569  | 1.1646 | negative | YES |
| genus. RuminococcaceaeUCG003    | LargeArteryStroke | Inverse variance weighted | 1.07 | negative | 1.4  | 0.82 | 1.7938 | 1.0507 | 3.0625 | positive | NO  |
| genus. RuminococcaceaeUCG004    | LargeArteryStroke | Inverse variance weighted | 0.99 | negative | 1.44 | 0.68 | 0.9737 | 0.6462 | 1.4671 | negative | YES |
| genus. RuminococcaceaeUCG005    | LargeArteryStroke | Inverse variance weighted | 1.29 | negative | 1.74 | 0.96 | 1.1946 | 0.8157 | 1.7495 | negative | YES |
| genus. Streptococcus            | LargeArteryStroke | Inverse variance weighted | 0.99 | negative | 1.3  | 0.75 | 0.7664 | 0.5641 | 1.0413 | negative | YES |
| genus. Turicibacter             | LargeArteryStroke | Inverse variance weighted | 0.99 | negative | 1.3  | 0.75 | 1.11   | 0.766  | 1.6084 | negative | YES |
| order. Bacteroidales            | LargeArteryStroke | Inverse variance weighted | 1.23 | negative | 1.63 | 0.93 | 1.0195 | 0.4896 | 2.1229 | negative | YES |
| order. Bifidobacteriales        | LargeArteryStroke | Inverse variance weighted | 1.12 | negative | 1.54 | 0.81 | 0.9702 | 0.563  | 1.672  | negative | YES |
| order. Burkholderiales          | LargeArteryStroke | Inverse variance weighted | 1.23 | negative | 1.72 | 0.89 | 0.9482 | 0.5906 | 1.5224 | negative | YES |
| order. Clostridiales            | LargeArteryStroke | Inverse variance weighted | 1.3  | negative | 1.91 | 0.89 | 0.999  | 0.6098 | 1.6367 | negative | YES |
| order. Coriobacteriales         | LargeArteryStroke | Inverse variance weighted | 1.41 | negative | 2.28 | 0.88 | 1.0936 | 0.6956 | 1.7193 | negative | YES |
| order. Desulfovibrionales       | LargeArteryStroke | Inverse variance weighted | 1.01 | negative | 1.38 | 0.73 | 1.0154 | 0.6551 | 1.5738 | negative | YES |
| order. Erysipelotrichales       | LargeArteryStroke | Inverse variance weighted | 0.79 | negative | 1.15 | 0.54 | 0.8776 | 0.4018 | 1.9169 | negative | YES |
| order. Gastranaerophilales      | LargeArteryStroke | Inverse variance weighted | 0.85 | negative | 1.19 | 0.62 | 0.9338 | 0.5166 | 1.688  | negative | YES |
| order. Lactobacillales          | LargeArteryStroke | Inverse variance weighted | 0.94 | negative | 1.32 | 0.67 | 0.5884 | 0.3611 | 0.9586 | positive | NO  |
| order. NB1n                     | LargeArteryStroke | Inverse variance weighted | 1.12 | negative | 1.33 | 0.94 | 1.052  | 0.8352 | 1.3251 | negative | YES |
| order. Selenomonadales          | LargeArteryStroke | Inverse variance weighted | 0.74 | negative | 1.19 | 0.46 | 0.4603 | 0.2477 | 0.8556 | positive | NO  |
| order. Victivallales            | LargeArteryStroke | Inverse variance weighted | 1.11 | negative | 1.35 | 0.91 | 1.1046 | 0.7876 | 1.5491 | negative | YES |
| phylum. Actinobacteria          | LargeArteryStroke | Inverse variance weighted | 1.25 | negative | 1.7  | 0.92 | 0.8452 | 0.5956 | 1.1994 | negative | YES |
| phylum. Bacteroidetes           | LargeArteryStroke | Inverse variance weighted | 1.33 | negative | 2.1  | 0.84 | 1.0259 | 0.5003 | 2.1034 | negative | YES |
| phylum. Cyanobacteria           | LargeArteryStroke | Inverse variance weighted | 1.27 | negative | 1.7  | 0.95 | 0.9065 | 0.6563 | 1.252  | negative | YES |
| phylum. Euryarchaeota           | LargeArteryStroke | Inverse variance weighted | 0.9  | negative | 1.19 | 0.68 | 0.7346 | 0.5493 | 0.9826 | positive | NO  |
| phylum. Firmicutes              | LargeArteryStroke | Inverse variance weighted | 0.91 | negative | 1.44 | 0.58 | 0.7735 | 0.259  | 2.3102 | negative | YES |
| phylum. Lentisphaerae           | LargeArteryStroke | Inverse variance weighted | 1.05 | negative | 1.31 | 0.84 | 1.1027 | 0.7905 | 1.5381 | negative | YES |
| phylum. Tenericutes             | LargeArteryStroke | Inverse variance weighted | 0.89 | negative | 1.21 | 0.65 | 0.8008 | 0.4972 | 1.2899 | negative | YES |
| phylum. Verrucomicrobia         | LargeArteryStroke | Inverse variance weighted | 0.87 | negative | 1.15 | 0.66 | 1.2046 | 0.7317 | 1.983  | negative | YES |
| class. Actinobacteria           | SmallVesselStroke | Inverse variance weighted | 1.25 | negative | 1.58 | 0.98 | 1.1541 | 0.8673 | 1.5359 | negative | YES |
| class. Bacilli                  | SmallVesselStroke | Inverse variance weighted | 1.27 | positive | 1.53 | 1.06 | 1.3573 | 0.9036 | 2.0387 | negative | NO  |
| class. Bacteroidia              | SmallVesselStroke | Inverse variance weighted | 0.99 | negative | 1.21 | 0.81 | 1.0199 | 0.6163 | 1.6879 | negative | YES |
| class. Betaproteobacteria       | SmallVesselStroke | Inverse variance weighted | 0.96 | negative | 1.23 | 0.75 | 0.8642 | 0.5646 | 1.323  | negative | YES |
| class. Clostridia               | SmallVesselStroke | Inverse variance weighted | 0.99 | negative | 1.27 | 0.78 | 0.6075 | 0.3439 | 1.0733 | negative | YES |
| class. Coriobacteriia           | SmallVesselStroke | Inverse variance weighted | 1.31 | negative | 1.76 | 0.97 | 0.7642 | 0.5059 | 1.1543 | negative | YES |
| class. Deltaproteobacteria      | SmallVesselStroke | Inverse variance weighted | 0.89 | negative | 1.09 | 0.73 | 1.0399 | 0.508  | 2.1285 | negative | YES |
| class. Erysipelotrichia         | SmallVesselStroke | Inverse variance weighted | 0.91 | negative | 1.21 | 0.69 | 0.7981 | 0.5076 | 1.2547 | negative | YES |
| class. Lentisphaeria            | SmallVesselStroke | Inverse variance weighted | 1.11 | negative | 1.31 | 0.94 | 0.8663 | 0.6611 | 1.1353 | negative | YES |
| class. Melainabacteria          | SmallVesselStroke | Inverse variance weighted | 1.08 | negative | 1.35 | 0.87 | 1.0298 | 0.6864 | 1.5452 | negative | YES |
| class. Methanobacteria          | SmallVesselStroke | Inverse variance weighted | 1.01 | negative | 1.17 | 0.86 | 1.0579 | 0.8489 | 1.3183 | negative | YES |
| class. Mollicutes               | SmallVesselStroke | Inverse variance weighted | 1.15 | negative | 1.43 | 0.94 | 1.01   | 0.5755 | 1.7724 | negative | YES |

|                                    |                   |                           |      |          |      |      |        |        |        |          |     |
|------------------------------------|-------------------|---------------------------|------|----------|------|------|--------|--------|--------|----------|-----|
| class.Negativicutes                | SmallVesselStroke | Inverse variance weighted | 0.95 | negative | 1.28 | 0.71 | 0.8355 | 0.4191 | 1.6659 | negative | YES |
| family.Acidaminococcaceae          | SmallVesselStroke | Inverse variance weighted | 0.87 | negative | 1.12 | 0.67 | 0.8155 | 0.5349 | 1.2431 | negative | YES |
| family.Alcaligenaceae              | SmallVesselStroke | Inverse variance weighted | 0.95 | negative | 1.24 | 0.73 | 0.9761 | 0.6392 | 1.4907 | negative | YES |
| family.Bifidobacteriaceae          | SmallVesselStroke | Inverse variance weighted | 0.99 | negative | 1.23 | 0.8  | 0.9938 | 0.7086 | 1.3938 | negative | YES |
| family.ClostridialesvadinBB60group | SmallVesselStroke | Inverse variance weighted | 1.13 | negative | 1.31 | 0.97 | 0.8695 | 0.6025 | 1.255  | negative | YES |
| family.Coriobacteriaceae           | SmallVesselStroke | Inverse variance weighted | 1.31 | negative | 1.76 | 0.97 | 0.7642 | 0.5059 | 1.1543 | negative | YES |
| family.Defluviitaleaceae           | SmallVesselStroke | Inverse variance weighted | 1.15 | negative | 1.4  | 0.95 | 1.0701 | 0.4738 | 2.4171 | negative | YES |
| family.Desulfovibrionaceae         | SmallVesselStroke | Inverse variance weighted | 0.88 | negative | 1.06 | 0.73 | 1.0323 | 0.5064 | 2.1043 | negative | YES |
| family.Erysipelotrichaceae         | SmallVesselStroke | Inverse variance weighted | 0.91 | negative | 1.21 | 0.69 | 0.7981 | 0.5076 | 1.2547 | negative | YES |
| family.FamilyXI                    | SmallVesselStroke | Inverse variance weighted | 0.96 | negative | 1.07 | 0.86 | 0.8847 | 0.6951 | 1.126  | negative | YES |
| family.Methanobacteriaceae         | SmallVesselStroke | Inverse variance weighted | 1.01 | negative | 1.17 | 0.86 | 1.0579 | 0.8489 | 1.3183 | negative | YES |
| family.Pasteurellaceae             | SmallVesselStroke | Inverse variance weighted | 0.87 | negative | 1.15 | 0.66 | 1.1726 | 0.9072 | 1.5157 | negative | YES |
| family.Peptococcaceae              | SmallVesselStroke | Inverse variance weighted | 1.13 | negative | 1.42 | 0.9  | 0.9939 | 0.7605 | 1.299  | negative | YES |
| family.Peptostreptococcaceae       | SmallVesselStroke | Inverse variance weighted | 1.1  | negative | 1.34 | 0.9  | 0.7823 | 0.5765 | 1.0616 | negative | YES |
| family.Prevotellaceae              | SmallVesselStroke | Inverse variance weighted | 1.14 | negative | 1.37 | 0.95 | 0.9611 | 0.5734 | 1.6107 | negative | YES |
| family.Rhodospirillaceae           | SmallVesselStroke | Inverse variance weighted | 0.86 | negative | 1.04 | 0.71 | 0.9129 | 0.6277 | 1.3276 | negative | YES |
| family.Rikenellaceae               | SmallVesselStroke | Inverse variance weighted | 0.94 | negative | 1.15 | 0.76 | 0.9994 | 0.5894 | 1.6945 | negative | YES |
| family.Ruminococcaceae             | SmallVesselStroke | Inverse variance weighted | 1.07 | negative | 1.36 | 0.85 | 1.4089 | 0.5213 | 3.808  | negative | YES |
| family.Streptococcaceae            | SmallVesselStroke | Inverse variance weighted | 1.26 | positive | 1.57 | 1    | 1.1098 | 0.7395 | 1.6654 | negative | NO  |
| family.Victivallaceae              | SmallVesselStroke | Inverse variance weighted | 0.97 | negative | 1.13 | 0.83 | 0.9493 | 0.6964 | 1.294  | negative | YES |
| genus.Adlercreutzia                | SmallVesselStroke | Inverse variance weighted | 1.12 | negative | 1.77 | 0.7  | 1.3859 | 0.8748 | 2.1956 | negative | YES |
| genus.Allisonella                  | SmallVesselStroke | Inverse variance weighted | 1.1  | negative | 1.26 | 0.96 | 1.1721 | 0.9204 | 1.4927 | negative | YES |
| genus.Bifidobacterium              | SmallVesselStroke | Inverse variance weighted | 1.14 | negative | 1.41 | 0.93 | 1.0001 | 0.7117 | 1.4056 | negative | YES |
| genus.Bilophila                    | SmallVesselStroke | Inverse variance weighted | 1.04 | negative | 1.38 | 0.78 | 1.049  | 0.4115 | 2.6741 | negative | YES |
| genus.Blautia                      | SmallVesselStroke | Inverse variance weighted | 0.82 | negative | 1.12 | 0.61 | 0.9747 | 0.7001 | 1.3569 | negative | YES |
| genus.Butyricimonas                | SmallVesselStroke | Inverse variance weighted | 1    | negative | 1.22 | 0.82 | 0.9211 | 0.6552 | 1.2949 | negative | YES |
| genus.Butyryivibrio                | SmallVesselStroke | Inverse variance weighted | 0.8  | positive | 0.99 | 0.65 | 1.0531 | 0.8643 | 1.2832 | negative | NO  |
| genus.CandidatusSoleaferrea        | SmallVesselStroke | Inverse variance weighted | 0.74 | positive | 0.92 | 0.59 | 1.0994 | 0.7636 | 1.583  | negative | NO  |
| genus.Catenibacterium              | SmallVesselStroke | Inverse variance weighted | 0.96 | negative | 1.14 | 0.81 | 1.0679 | 0.6629 | 1.7202 | negative | YES |
| genus.Collinsella                  | SmallVesselStroke | Inverse variance weighted | 0.85 | negative | 1.22 | 0.59 | 0.8351 | 0.5084 | 1.3718 | negative | YES |
| genus.DefluviitaleaceaeUCG011      | SmallVesselStroke | Inverse variance weighted | 1.09 | negative | 1.31 | 0.9  | 1.0711 | 0.4679 | 2.452  | negative | YES |
| genus.Eggerthella                  | SmallVesselStroke | Inverse variance weighted | 1.02 | negative | 1.19 | 0.87 | 0.8754 | 0.5605 | 1.367  | negative | YES |
| genus.Eisenbergiella               | SmallVesselStroke | Inverse variance weighted | 1.1  | negative | 1.29 | 0.94 | 0.9325 | 0.7125 | 1.2206 | negative | YES |
| genus.Enterorhabdus                | SmallVesselStroke | Inverse variance weighted | 0.88 | negative | 1.21 | 0.64 | 0.9115 | 0.6173 | 1.3461 | negative | YES |
| genus.ErysipelotrichaceaeUCG003    | SmallVesselStroke | Inverse variance weighted | 1.01 | negative | 1.27 | 0.8  | 1.0957 | 0.6949 | 1.7277 | negative | YES |
| genus.Fusicatenibacter             | SmallVesselStroke | Inverse variance weighted | 1    | negative | 1.31 | 0.77 | 0.5931 | 0.41   | 0.858  | positive | NO  |
| genus.Fusicatenibacter             | SmallVesselStroke | Inverse variance weighted | 1.4  | negative | 2.29 | 0.86 | 0.5931 | 0.41   | 0.858  | positive | NO  |
| genus.Haemophilus                  | SmallVesselStroke | Inverse variance weighted | 0.96 | negative | 1.16 | 0.8  | 1.0911 | 0.8526 | 1.3963 | negative | YES |
| genus.Howardella                   | SmallVesselStroke | Inverse variance weighted | 1.03 | negative | 1.16 | 0.91 | 0.8702 | 0.6901 | 1.0973 | negative | YES |
| genus.Hungatella                   | SmallVesselStroke | Inverse variance weighted | 0.9  | negative | 1.18 | 0.69 | 0.912  | 0.682  | 1.2195 | negative | YES |
| genus.Intestinibacter              | SmallVesselStroke | Inverse variance weighted | 0.85 | negative | 1.05 | 0.69 | 1.0251 | 0.628  | 1.6733 | negative | YES |
| genus.Intestinimonas               | SmallVesselStroke | Inverse variance weighted | 0.85 | positive | 0.98 | 0.73 | 1.3224 | 0.9042 | 1.9342 | negative | NO  |
| genus.LachnospiraceaeFCS020group   | SmallVesselStroke | Inverse variance weighted | 0.92 | negative | 1.09 | 0.77 | 0.6587 | 0.471  | 0.9213 | positive | NO  |
| genus.LachnospiraceaeNC2004group   | SmallVesselStroke | Inverse variance weighted | 1    | negative | 1.3  | 0.76 | 0.9347 | 0.6782 | 1.2883 | negative | YES |
| genus.LachnospiraceaeUCG001        | SmallVesselStroke | Inverse variance weighted | 0.93 | negative | 1.14 | 0.77 | 0.7966 | 0.5809 | 1.0924 | negative | YES |
| genus.LachnospiraceaeUCG004        | SmallVesselStroke | Inverse variance weighted | 1.27 | negative | 1.69 | 0.95 | 1.0683 | 0.7574 | 1.5068 | negative | YES |
| genus.LachnospiraceaeUCG008        | SmallVesselStroke | Inverse variance weighted | 0.98 | negative | 1.13 | 0.85 | 0.8504 | 0.6056 | 1.1941 | negative | YES |
| genus.LachnospiraceaeUCG010        | SmallVesselStroke | Inverse variance weighted | 1.24 | negative | 1.98 | 0.77 | 1.2567 | 0.8468 | 1.8649 | negative | YES |
| genus.Lactobacillus                | SmallVesselStroke | Inverse variance weighted | 1.01 | negative | 1.3  | 0.78 | 0.7452 | 0.5327 | 1.0423 | negative | YES |
| genus.Lactobacillus                | SmallVesselStroke | Inverse variance weighted | 1.1  | negative | 1.77 | 0.68 | 0.7452 | 0.5327 | 1.0423 | negative | YES |
| genus.Lactococcus                  | SmallVesselStroke | Inverse variance weighted | 1.04 | negative | 1.19 | 0.91 | 0.7856 | 0.6255 | 0.9868 | positive | NO  |
| genus.Marvinbryantia               | SmallVesselStroke | Inverse variance weighted | 0.91 | negative | 1.25 | 0.66 | 0.7316 | 0.466  | 1.1487 | negative | YES |
| genus.Marvinbryantia               | SmallVesselStroke | Inverse variance weighted | 0.92 | negative | 1.36 | 0.62 | 0.7316 | 0.466  | 1.1487 | negative | YES |
| genus.Olsenella                    | SmallVesselStroke | Inverse variance weighted | 0.95 | negative | 1.12 | 0.81 | 1.0415 | 0.7787 | 1.3929 | negative | YES |
| genus.Oscillibacter                | SmallVesselStroke | Inverse variance weighted | 0.96 | negative | 1.11 | 0.83 | 1.196  | 0.851  | 1.681  | negative | YES |
| genus.Oscillospira                 | SmallVesselStroke | Inverse variance weighted | 0.89 | negative | 1.26 | 0.63 | 1.3996 | 0.8618 | 2.273  | negative | YES |

|                                 |                   |                           |      |          |      |      |        |        |        |          |     |
|---------------------------------|-------------------|---------------------------|------|----------|------|------|--------|--------|--------|----------|-----|
| genus. Oxalobacter              | SmallVesselStroke | Inverse variance weighted | 0.89 | negative | 1.01 | 0.78 | 0.8594 | 0.7056 | 1.0467 | negative | YES |
| genus. Paraprevotella           | SmallVesselStroke | Inverse variance weighted | 1.13 | negative | 1.34 | 0.96 | 1.0858 | 0.7504 | 1.5711 | negative | YES |
| genus. Parasutterella           | SmallVesselStroke | Inverse variance weighted | 0.86 | negative | 1.02 | 0.73 | 0.8379 | 0.6231 | 1.1268 | negative | YES |
| genus. Parasutterella           | SmallVesselStroke | Inverse variance weighted | 0.81 | negative | 1.16 | 0.57 | 0.8379 | 0.6231 | 1.1268 | negative | YES |
| genus. Peptococcus              | SmallVesselStroke | Inverse variance weighted | 1.09 | negative | 1.28 | 0.93 | 0.9764 | 0.7767 | 1.2273 | negative | YES |
| genus. Prevotella7              | SmallVesselStroke | Inverse variance weighted | 1.23 | positive | 1.41 | 1.08 | 1.019  | 0.8216 | 1.2639 | negative | NO  |
| genus. RikenellaceaeRC9gutgroup | SmallVesselStroke | Inverse variance weighted | 1.05 | negative | 1.22 | 0.91 | 0.994  | 0.7695 | 1.2839 | negative | YES |
|                                 | SmallVesselStroke | Inverse variance weighted | 1.08 | negative | 1.54 | 0.76 | 0.7213 | 0.4549 | 1.1437 | negative | YES |
| genus. Romboutsia               | SmallVesselStroke | Inverse variance weighted | 1.08 | negative | 1.54 | 0.76 | 0.7213 | 0.4549 | 1.1437 | negative | YES |
| genus. Ruminiclostridium5       | SmallVesselStroke | Inverse variance weighted | 0.98 | negative | 1.28 | 0.75 | 1.0288 | 0.7244 | 1.4612 | negative | YES |
| genus. Ruminiclostridium6       | SmallVesselStroke | Inverse variance weighted | 0.87 | negative | 1.06 | 0.71 | 0.9142 | 0.6561 | 1.2739 | negative | YES |
| genus. Ruminiclostridium9       | SmallVesselStroke | Inverse variance weighted | 0.95 | negative | 1.25 | 0.72 | 1.1361 | 0.6848 | 1.8848 | negative | YES |
| genus. RuminococcaceaeUCG002    | SmallVesselStroke | Inverse variance weighted | 0.99 | negative | 1.24 | 0.79 | 0.7992 | 0.5391 | 1.1847 | negative | YES |
| genus. RuminococcaceaeUCG003    | SmallVesselStroke | Inverse variance weighted | 1.14 | negative | 1.36 | 0.96 | 1.0329 | 0.4368 | 2.4429 | negative | YES |
| genus. RuminococcaceaeUCG004    | SmallVesselStroke | Inverse variance weighted | 0.98 | negative | 1.33 | 0.72 | 0.7882 | 0.5347 | 1.1617 | negative | YES |
| genus. RuminococcaceaeUCG005    | SmallVesselStroke | Inverse variance weighted | 1.07 | negative | 1.32 | 0.87 | 1.2901 | 0.8735 | 1.9055 | negative | YES |
| genus. RuminococcaceaeUCG009    | SmallVesselStroke | Inverse variance weighted | 1    | negative | 1.28 | 0.79 | 0.865  | 0.5934 | 1.2607 | negative | YES |
| genus. Streptococcus            | SmallVesselStroke | Inverse variance weighted | 1.2  | negative | 1.5  | 0.95 | 1.172  | 0.7653 | 1.7949 | negative | YES |
| genus. Turicibacter             | SmallVesselStroke | Inverse variance weighted | 1.18 | negative | 1.52 | 0.91 | 1.1396 | 0.8146 | 1.5943 | negative | YES |
| order. Bacteroidales            | SmallVesselStroke | Inverse variance weighted | 1.02 | negative | 1.15 | 0.91 | 1.0199 | 0.6163 | 1.6879 | negative | YES |
| order. Bifidobacteriales        | SmallVesselStroke | Inverse variance weighted | 0.99 | negative | 1.23 | 0.8  | 0.9938 | 0.7086 | 1.3938 | negative | YES |
| order. Burkholderiales          | SmallVesselStroke | Inverse variance weighted | 0.87 | negative | 1.16 | 0.65 | 0.8627 | 0.5898 | 1.262  | negative | YES |
| order. Burkholderiales          | SmallVesselStroke | Inverse variance weighted | 1.03 | negative | 1.5  | 0.7  | 0.8627 | 0.5898 | 1.262  | negative | YES |
| order. Clostridiales            | SmallVesselStroke | Inverse variance weighted | 0.99 | negative | 1.27 | 0.78 | 0.6054 | 0.3431 | 1.0685 | negative | YES |
| order. Clostridiales            | SmallVesselStroke | Inverse variance weighted | 0.99 | negative | 1.27 | 0.78 | 0.6054 | 0.3431 | 1.0685 | negative | YES |
| order. Coriobacteriales         | SmallVesselStroke | Inverse variance weighted | 1.31 | negative | 1.76 | 0.97 | 0.7642 | 0.5059 | 1.1543 | negative | YES |
| order. Desulfovibrionales       | SmallVesselStroke | Inverse variance weighted | 0.88 | negative | 1.06 | 0.73 | 1.0305 | 0.5052 | 2.1017 | negative | YES |
| order. Erysipelotrichales       | SmallVesselStroke | Inverse variance weighted | 0.91 | negative | 1.21 | 0.69 | 0.7981 | 0.5076 | 1.2547 | negative | YES |
| order. Gastranaerophilales      | SmallVesselStroke | Inverse variance weighted | 1.08 | negative | 1.35 | 0.87 | 1.0304 | 0.6871 | 1.5452 | negative | YES |
| order. Lactobacillales          | SmallVesselStroke | Inverse variance weighted | 1.21 | negative | 1.49 | 0.99 | 1.1736 | 0.7363 | 1.8705 | negative | YES |
| order. Methanobacteriales       | SmallVesselStroke | Inverse variance weighted | 1.01 | negative | 1.17 | 0.86 | 1.0579 | 0.8489 | 1.3183 | negative | YES |
| order. NB1n                     | SmallVesselStroke | Inverse variance weighted | 0.98 | negative | 1.11 | 0.86 | 1.3282 | 1.0734 | 1.6434 | positive | NO  |
| order. Pasteurellales           | SmallVesselStroke | Inverse variance weighted | 0.87 | negative | 1.15 | 0.66 | 1.1726 | 0.9072 | 1.5157 | negative | YES |
| order. Rhodospirillales         | SmallVesselStroke | Inverse variance weighted | 0.95 | negative | 1.15 | 0.78 | 1.3374 | 0.8871 | 2.0163 | negative | YES |
| order. Selenomonadales          | SmallVesselStroke | Inverse variance weighted | 0.95 | negative | 1.28 | 0.71 | 0.8355 | 0.4191 | 1.6659 | negative | YES |
| order. Victivallales            | SmallVesselStroke | Inverse variance weighted | 1.11 | negative | 1.31 | 0.94 | 0.8663 | 0.6611 | 1.1353 | negative | YES |
| phylum. Actinobacteria          | SmallVesselStroke | Inverse variance weighted | 1.13 | negative | 1.42 | 0.9  | 1.0401 | 0.7488 | 1.4449 | negative | YES |
| phylum. Bacteroidetes           | SmallVesselStroke | Inverse variance weighted | 0.98 | negative | 1.19 | 0.81 | 1.0219 | 0.6239 | 1.6738 | negative | YES |
| phylum. Cyanobacteria           | SmallVesselStroke | Inverse variance weighted | 1.22 | negative | 1.51 | 0.99 | 1.0676 | 0.8207 | 1.3888 | negative | YES |
| phylum. Euryarchaeota           | SmallVesselStroke | Inverse variance weighted | 1.01 | negative | 1.15 | 0.88 | 0.9443 | 0.7137 | 1.2493 | negative | YES |
| phylum. Firmicutes              | SmallVesselStroke | Inverse variance weighted | 0.92 | negative | 1.25 | 0.68 | 0.7111 | 0.3616 | 1.3984 | negative | YES |
| phylum. Lentisphaerae           | SmallVesselStroke | Inverse variance weighted | 1.07 | negative | 1.32 | 0.87 | 0.8665 | 0.6643 | 1.1302 | negative | YES |
| phylum. Tendericutes            | SmallVesselStroke | Inverse variance weighted | 1.15 | negative | 1.43 | 0.94 | 1.01   | 0.5755 | 1.7724 | negative | YES |
| phylum. Verrucomicrobia         | SmallVesselStroke | Inverse variance weighted | 1.24 | negative | 1.6  | 0.96 | 1.5697 | 0.9783 | 2.5187 | negative | YES |

Note: we only find MR analysis result of SVS, CES, LAS in Meng's study, and the comparsion based on the inverse variance weighted method

Table. S9a. The association results of species Bacteroides pectinophilus’s IVs

| SNP        | Gene Expression                                                                                 | Disease and traits                                                                                                     | Proteins               | Metabolites                          | Epigenetic                                                                                                                                                                                                        |
|------------|-------------------------------------------------------------------------------------------------|------------------------------------------------------------------------------------------------------------------------|------------------------|--------------------------------------|-------------------------------------------------------------------------------------------------------------------------------------------------------------------------------------------------------------------|
| rs10074806 | Gene expression of DHFR                                                                         | /                                                                                                                      | /                      | /                                    | DNA methylation of cg16375999, cg08926967, cg14868212, cg12576332, cg26908328, cg04506563, cg07184465, cg00024404, cg04506563 and cg04506563                                                                      |
| rs10198145 | Gene expression of DGUOK, DGUOK-AS1                                                             | /                                                                                                                      | /                      | /                                    | DNA methylation of cg17176609, cg25118606 and cg14481315.                                                                                                                                                         |
| rs11689812 | Gene expression of PLGLB1, AC125232.1, AC092651.1, ANAPC1P1, RGPD1, ANAPC1P1, ENSG00000231259.3 | /                                                                                                                      | /                      | /                                    | DNA methylation of cg03196485                                                                                                                                                                                     |
| rs12491154 | intron of AC133680.1                                                                            | /                                                                                                                      | /                      | /                                    | DNA methylation of cg00214791                                                                                                                                                                                     |
| rs2071064  | Gene expression of SPSB2, LRRC23, TP11, RPL13P5, LRRC23;ENO2, DSTNP2, GPR162                    | /                                                                                                                      | /                      | /                                    | /                                                                                                                                                                                                                 |
| rs2602652  | intron of CNTNAP5                                                                               | /                                                                                                                      | /                      | /                                    | /                                                                                                                                                                                                                 |
| rs2822702  | intron of SAMSN1                                                                                | /                                                                                                                      | /                      | /                                    | /                                                                                                                                                                                                                 |
| rs4779862  | Gene expression of KLF13, CTD-3092A11.2                                                         |                                                                                                                        |                        | 3-methylxanthine/ADpSGEGD FXAEGGGVR* | DNA methylation of cg26814396, cg26146569, cg21385909, cg20900050, cg20511277, cg17907520, cg17796461, cg16148410, cg12515635, cg10965478, cg07881470, cg07814318, cg06000144, cg05368038, cg02964434, cg00626386 |
| rs73094068 | intron of PLCB1                                                                                 | /                                                                                                                      | /                      | /                                    | DNA methylation of cg05545808                                                                                                                                                                                     |
| rs75942399 | intergenic of CTD-2533K21.1                                                                     | /                                                                                                                      | /                      | /                                    | /                                                                                                                                                                                                                 |
| rs78852205 | Gene expression of PTPRJ, SLC43A3                                                               | Height. Self-reported hypertension, Vascular or heart problems diagnosed by doctor: high blood pressure, Birth weight, | Oxidoreductase HTATIP2 | Hydroquinone sulfate/phenol sulfate  | DNA methylation of cg05954192, cg17560283, cg01511567, cg05954192, cg13526040, cg25628989, cg01427848, cg26637069, cg00045227, cg15808924,                                                                        |

Note: The parameters setting in PhenoScanner v2 are pval=1e-5, r2=0.8, Proxies=EAS;

S9b. The association results of class Negativicutes’s IVs

| SNP        | Gene Expression                | Disease and traits | Proteins | Metabolites                                       | Epigenetic                                            |
|------------|--------------------------------|--------------------|----------|---------------------------------------------------|-------------------------------------------------------|
| rs12333818 | Gene expression of TDRD6       | /                  | /        |                                                   | DNA methylation of cg01177168, cg03009463, cg18912530 |
| rs13047856 | intron of AP000472.3           | /                  | /        |                                                   |                                                       |
| rs1393838  | Gene expression of SRP19;REEP5 | /                  | /        | 1-methylnicotinamide, 3-hydroxy-3-methylglutarate | DNA methylation of cg03132551, cg09990584, cg19726355 |

|            |                                                                                                                               |                                                                                                                                                                                                                                                                                                                                                                                                                                                            |                                                                              |   |                                                                                                                                                                                                                                                                      |
|------------|-------------------------------------------------------------------------------------------------------------------------------|------------------------------------------------------------------------------------------------------------------------------------------------------------------------------------------------------------------------------------------------------------------------------------------------------------------------------------------------------------------------------------------------------------------------------------------------------------|------------------------------------------------------------------------------|---|----------------------------------------------------------------------------------------------------------------------------------------------------------------------------------------------------------------------------------------------------------------------|
| rs2193060  |                                                                                                                               | /                                                                                                                                                                                                                                                                                                                                                                                                                                                          | /                                                                            | / | DNA methylation of<br>cg15787146, cg09344028, cg02788090, cg06234051, cg11350586, cg01865113<br>, cg24393783                                                                                                                                                         |
| rs2350226  | Gene expression of<br>ENSG00000230922.1, PHF21B and<br>PRR5                                                                   | /                                                                                                                                                                                                                                                                                                                                                                                                                                                          | /                                                                            | / | DNA methylation of<br>cg00758296, cg02869649, cg05064352, cg06008724, cg12877165, cg14797198<br>, cg16816603, cg18733974, cg23944102                                                                                                                                 |
| rs2948895  | Gene expression of KIAA1462,<br>MTPAP;MAP3K8;LOC729668                                                                        | Chronic alcohol related<br>pancreatitis or recurrent acute<br>alcohol related pancreatitis,<br>Coronary artery disease,Lymphocyte<br>count,Monocyte count, white cell<br>count,Myocardial<br>infarction,Pancreatitis,Platelet<br>count,Plateletcrit                                                                                                                                                                                                        | /                                                                            | / | DNA methylation of<br>cg00479240, cg01201802, cg04453371, cg06790044, cg07943766, cg10909801<br>, cg11454459, cg12137700, cg19223064, cg19603836, cg23648810, cg2435047<br>5,Histone modification of H3K4me1                                                         |
| rs61569731 | Gene expression of C3AR1                                                                                                      | /                                                                                                                                                                                                                                                                                                                                                                                                                                                          | /                                                                            | / | /                                                                                                                                                                                                                                                                    |
| rs7176287  | Gene expression of C15orf65,<br>CCPG1,DYX1C1;THEM4, FLJ27352, NEDD<br>4, PIGB, RAB27A, PIGB;CCPG1, RSL24D1<br>,RP11-139H15.1, | Arm fat mass left, Arm fat mass<br>right, Arm fat-free mass left, Arm<br>predicted mass right, Basal<br>metabolic rate, Body mass index,<br>Cause of death: brain, unspecified,<br>Impedance of leg left,Impedance of<br>leg right,Impedance of whole<br>body,Leg fat-free mass left,Leg<br>fat-free mass left, Leg fat-free<br>mass right, Leg predicted mass<br>left, Waist circumference, Weight,<br>Whole body fat-free mass, Whole<br>body water mass | A disintegrin and<br>metalloproteinase<br>with<br>thrombospondin<br>motifs 4 | / | DNA methylation of cg05911928, cg06584237, cg11288833                                                                                                                                                                                                                |
| rs74528033 | intron of LINC01060                                                                                                           | /                                                                                                                                                                                                                                                                                                                                                                                                                                                          | /                                                                            | / | /                                                                                                                                                                                                                                                                    |
| rs80074416 | intergenic of RP11-737F10.1                                                                                                   | /                                                                                                                                                                                                                                                                                                                                                                                                                                                          | /                                                                            | / | /                                                                                                                                                                                                                                                                    |
| rs9323838  | Transcript ratio of FOXN3                                                                                                     | /                                                                                                                                                                                                                                                                                                                                                                                                                                                          | /                                                                            | / | DNA methylation of cg18666249,<br>cg18657988, cg16974014, cg16160493, cg12169568, cg09271279, cg05053979<br>, cg05053979                                                                                                                                             |
| rs9456980  | Gene expression of<br>GTF2H5, probe:2933392, SERAC1, SYNJ<br>2                                                                | /                                                                                                                                                                                                                                                                                                                                                                                                                                                          | /                                                                            | / | DNA methylation of<br>cg02272278, cg03467087, cg03940776, cg04776470, cg05987787, cg06633162<br>, cg08614082, cg08918658, cg09198138, cg10225755, cg10288437, cg1123011<br>2, cg12002139, cg12308631, cg15824056, cg18738548, cg18758976, cg192364<br>31, cg22307058 |

Note: The parameters setting in PhenoScanner v2 are pval=1e-5, r2=0.8, Proxies=EAS; Build:37

Table.S10.Mendelian Randomization result for stroke to gut microbiome in EAS

| exposure            | outcome | method                    | nsnp | b       | se     | pval   | egger intercept | pleio se | pleio p | Q      | Q pval | sensitivity ratio |
|---------------------|---------|---------------------------|------|---------|--------|--------|-----------------|----------|---------|--------|--------|-------------------|
| CardioEmbolicStroke | MF0001  | MR Egger                  | 9    | -0.1628 | 0.0958 | 0.1330 | 0.0425          | 0.0244   | 0.1258  | 6.2243 | 0.6221 | 2832.8952         |
| CardioEmbolicStroke | MF0001  | Weighted median           | 9    | 0.0024  | 0.0200 | 0.9061 | 0.0425          | 0.0244   | 0.1258  | 6.2243 | 0.6221 | 2832.8952         |
| CardioEmbolicStroke | MF0001  | Inverse variance weighted | 9    | 0.0017  | 0.0146 | 0.9083 | 0.0425          | 0.0244   | 0.1258  | 6.2243 | 0.6221 | 2832.8952         |
| CardioEmbolicStroke | MF0001  | Simple mode               | 9    | 0.0315  | 0.0317 | 0.3489 | 0.0425          | 0.0244   | 0.1258  | 6.2243 | 0.6221 | 2832.8952         |
| CardioEmbolicStroke | MF0001  | Weighted mode             | 9    | -0.0166 | 0.0304 | 0.6004 | 0.0425          | 0.0244   | 0.1258  | 6.2243 | 0.6221 | 2832.8952         |
| CardioEmbolicStroke | MF0002  | MR Egger                  | 9    | 0.2246  | 0.1600 | 0.2031 | -0.0568         | 0.0408   | 0.2070  | 4.8091 | 0.7778 | 1465.3676         |
| CardioEmbolicStroke | MF0002  | Weighted median           | 9    | 0.0027  | 0.0317 | 0.9318 | -0.0568         | 0.0408   | 0.2070  | 4.8091 | 0.7778 | 1465.3676         |
| CardioEmbolicStroke | MF0002  | Inverse variance weighted | 9    | 0.0048  | 0.0245 | 0.8437 | -0.0568         | 0.0408   | 0.2070  | 4.8091 | 0.7778 | 1465.3676         |
| CardioEmbolicStroke | MF0002  | Simple mode               | 9    | -0.0333 | 0.0482 | 0.5089 | -0.0568         | 0.0408   | 0.2070  | 4.8091 | 0.7778 | 1465.3676         |
| CardioEmbolicStroke | MF0002  | Weighted mode             | 9    | -0.0157 | 0.0474 | 0.7492 | -0.0568         | 0.0408   | 0.2070  | 4.8091 | 0.7778 | 1465.3676         |
| CardioEmbolicStroke | MF0003  | MR Egger                  | 9    | -0.1465 | 0.1034 | 0.1992 | 0.0356          | 0.0264   | 0.2194  | 5.6890 | 0.6820 | 2822.0637         |
| CardioEmbolicStroke | MF0003  | Weighted median           | 9    | -0.0224 | 0.0209 | 0.2843 | 0.0356          | 0.0264   | 0.2194  | 5.6890 | 0.6820 | 2822.0637         |
| CardioEmbolicStroke | MF0003  | Inverse variance weighted | 9    | -0.0087 | 0.0158 | 0.5797 | 0.0356          | 0.0264   | 0.2194  | 5.6890 | 0.6820 | 2822.0637         |
| CardioEmbolicStroke | MF0003  | Simple mode               | 9    | -0.0303 | 0.0339 | 0.3971 | 0.0356          | 0.0264   | 0.2194  | 5.6890 | 0.6820 | 2822.0637         |
| CardioEmbolicStroke | MF0003  | Weighted mode             | 9    | -0.0340 | 0.0338 | 0.3444 | 0.0356          | 0.0264   | 0.2194  | 5.6890 | 0.6820 | 2822.0637         |
| CardioEmbolicStroke | MF0004  | MR Egger                  | 9    | -0.1295 | 0.0808 | 0.1528 | 0.0297          | 0.0206   | 0.1929  | 5.2020 | 0.7358 | 3392.5453         |
| CardioEmbolicStroke | MF0004  | Weighted median           | 9    | -0.0198 | 0.0169 | 0.2417 | 0.0297          | 0.0206   | 0.1929  | 5.2020 | 0.7358 | 3392.5453         |
| CardioEmbolicStroke | MF0004  | Inverse variance weighted | 9    | -0.0145 | 0.0123 | 0.2390 | 0.0297          | 0.0206   | 0.1929  | 5.2020 | 0.7358 | 3392.5453         |
| CardioEmbolicStroke | MF0004  | Simple mode               | 9    | -0.0278 | 0.0260 | 0.3161 | 0.0297          | 0.0206   | 0.1929  | 5.2020 | 0.7358 | 3392.5453         |
| CardioEmbolicStroke | MF0004  | Weighted mode             | 9    | -0.0297 | 0.0237 | 0.2464 | 0.0297          | 0.0206   | 0.1929  | 5.2020 | 0.7358 | 3392.5453         |
| CardioEmbolicStroke | MF0005  | MR Egger                  | 9    | -0.0080 | 0.1263 | 0.9510 | -0.0033         | 0.0322   | 0.9218  | 7.0455 | 0.4242 | 1391.0813         |
| CardioEmbolicStroke | MF0005  | Weighted median           | 9    | -0.0234 | 0.0264 | 0.3748 | -0.0033         | 0.0322   | 0.9218  | 7.0455 | 0.4242 | 1391.0813         |
| CardioEmbolicStroke | MF0005  | Inverse variance weighted | 9    | -0.0207 | 0.0192 | 0.2811 | -0.0033         | 0.0322   | 0.9218  | 7.0455 | 0.4242 | 1391.0813         |
| CardioEmbolicStroke | MF0005  | Simple mode               | 9    | -0.0355 | 0.0443 | 0.4458 | -0.0033         | 0.0322   | 0.9218  | 7.0455 | 0.4242 | 1391.0813         |
| CardioEmbolicStroke | MF0005  | Weighted mode             | 9    | -0.0324 | 0.0418 | 0.4608 | -0.0033         | 0.0322   | 0.9218  | 7.0455 | 0.4242 | 1391.0813         |
| CardioEmbolicStroke | MF0006  | MR Egger                  | 9    | -0.0485 | 0.0771 | 0.5490 | 0.0163          | 0.0197   | 0.4336  | 8.0491 | 0.3283 | 2706.9202         |
| CardioEmbolicStroke | MF0006  | Weighted median           | 9    | 0.0208  | 0.0154 | 0.1763 | 0.0163          | 0.0197   | 0.4336  | 8.0491 | 0.3283 | 2706.9202         |
| CardioEmbolicStroke | MF0006  | Inverse variance weighted | 9    | 0.0147  | 0.0115 | 0.2017 | 0.0163          | 0.0197   | 0.4336  | 8.0491 | 0.3283 | 2706.9202         |
| CardioEmbolicStroke | MF0006  | Simple mode               | 9    | 0.0223  | 0.0259 | 0.4151 | 0.0163          | 0.0197   | 0.4336  | 8.0491 | 0.3283 | 2706.9202         |
| CardioEmbolicStroke | MF0006  | Weighted mode             | 9    | 0.0215  | 0.0256 | 0.4261 | 0.0163          | 0.0197   | 0.4336  | 8.0491 | 0.3283 | 2706.9202         |
| CardioEmbolicStroke | MF0007  | MR Egger                  | 9    | 0.2555  | 0.2343 | 0.3117 | -0.0622         | 0.0598   | 0.3325  | 5.6329 | 0.6883 | 685.7406          |
| CardioEmbolicStroke | MF0007  | Weighted median           | 9    | 0.0008  | 0.0443 | 0.9857 | -0.0622         | 0.0598   | 0.3325  | 5.6329 | 0.6883 | 685.7406          |
| CardioEmbolicStroke | MF0007  | Inverse variance weighted | 9    | 0.0144  | 0.0358 | 0.6873 | -0.0622         | 0.0598   | 0.3325  | 5.6329 | 0.6883 | 685.7406          |
| CardioEmbolicStroke | MF0007  | Simple mode               | 9    | 0.0035  | 0.0663 | 0.9597 | -0.0622         | 0.0598   | 0.3325  | 5.6329 | 0.6883 | 685.7406          |
| CardioEmbolicStroke | MF0007  | Weighted mode             | 9    | 0.0164  | 0.0712 | 0.8236 | -0.0622         | 0.0598   | 0.3325  | 5.6329 | 0.6883 | 685.7406          |
| CardioEmbolicStroke | MF0008  | MR Egger                  | 9    | -0.0511 | 0.0437 | 0.2809 | 0.0112          | 0.0112   | 0.3478  | 4.8064 | 0.7781 | 7643.0967         |
| CardioEmbolicStroke | MF0008  | Weighted median           | 9    | -0.0051 | 0.0088 | 0.5607 | 0.0112          | 0.0112   | 0.3478  | 4.8064 | 0.7781 | 7643.0967         |
| CardioEmbolicStroke | MF0008  | Inverse variance weighted | 9    | -0.0076 | 0.0067 | 0.2557 | 0.0112          | 0.0112   | 0.3478  | 4.8064 | 0.7781 | 7643.0967         |
| CardioEmbolicStroke | MF0008  | Simple mode               | 9    | 0.0032  | 0.0150 | 0.8368 | 0.0112          | 0.0112   | 0.3478  | 4.8064 | 0.7781 | 7643.0967         |
| CardioEmbolicStroke | MF0008  | Weighted mode             | 9    | 0.0036  | 0.0157 | 0.8263 | 0.0112          | 0.0112   | 0.3478  | 4.8064 | 0.7781 | 7643.0967         |
| CardioEmbolicStroke | MF0009  | MR Egger                  | 9    | -0.1495 | 0.0751 | 0.0870 | 0.0403          | 0.0192   | 0.0738  | 9.7927 | 0.2799 | 3188.5203         |
| CardioEmbolicStroke | MF0009  | Weighted median           | 9    | 0.0085  | 0.0153 | 0.5809 | 0.0403          | 0.0192   | 0.0738  | 9.7927 | 0.2799 | 3188.5203         |
| CardioEmbolicStroke | MF0009  | Inverse variance weighted | 9    | 0.0065  | 0.0127 | 0.6063 | 0.0403          | 0.0192   | 0.0738  | 9.7927 | 0.2799 | 3188.5203         |
| CardioEmbolicStroke | MF0009  | Simple mode               | 9    | 0.0084  | 0.0262 | 0.7571 | 0.0403          | 0.0192   | 0.0738  | 9.7927 | 0.2799 | 3188.5203         |
| CardioEmbolicStroke | MF0009  | Weighted mode             | 9    | 0.0040  | 0.0248 | 0.8754 | 0.0403          | 0.0192   | 0.0738  | 9.7927 | 0.2799 | 3188.5203         |
| CardioEmbolicStroke | MF0010  | MR Egger                  | 9    | -0.0194 | 0.0421 | 0.6593 | 0.0048          | 0.0107   | 0.6667  | 3.2718 | 0.8588 | 10481.8685        |
| CardioEmbolicStroke | MF0010  | Weighted median           | 9    | 0.0003  | 0.0082 | 0.9726 | 0.0048          | 0.0107   | 0.6667  | 3.2718 | 0.8588 | 10481.8685        |
| CardioEmbolicStroke | MF0010  | Inverse variance weighted | 9    | -0.0007 | 0.0064 | 0.9160 | 0.0048          | 0.0107   | 0.6667  | 3.2718 | 0.8588 | 10481.8685        |
| CardioEmbolicStroke | MF0010  | Simple mode               | 9    | 0.0002  | 0.0126 | 0.9884 | 0.0048          | 0.0107   | 0.6667  | 3.2718 | 0.8588 | 10481.8685        |
| CardioEmbolicStroke | MF0010  | Weighted mode             | 9    | -0.0030 | 0.0123 | 0.8156 | 0.0048          | 0.0107   | 0.6667  | 3.2718 | 0.8588 | 10481.8685        |
| CardioEmbolicStroke | MF0011  | MR Egger                  | 9    | 0.2190  | 0.1721 | 0.2439 | -0.0553         | 0.0439   | 0.2480  | 9.1147 | 0.3327 | 1343.0210         |
| CardioEmbolicStroke | MF0011  | Weighted median           | 9    | -0.0285 | 0.0357 | 0.4243 | -0.0553         | 0.0439   | 0.2480  | 9.1147 | 0.3327 | 1343.0210         |
| CardioEmbolicStroke | MF0011  | Inverse variance weighted | 9    | 0.0047  | 0.0272 | 0.8638 | -0.0553         | 0.0439   | 0.2480  | 9.1147 | 0.3327 | 1343.0210         |
| CardioEmbolicStroke | MF0011  | Simple mode               | 9    | -0.0537 | 0.0624 | 0.4146 | -0.0553         | 0.0439   | 0.2480  | 9.1147 | 0.3327 | 1343.0210         |
| CardioEmbolicStroke | MF0011  | Weighted mode             | 9    | -0.0520 | 0.0676 | 0.4634 | -0.0553         | 0.0439   | 0.2480  | 9.1147 | 0.3327 | 1343.0210         |
| CardioEmbolicStroke | MF0012  | MR Egger                  | 9    | 0.2986  | 0.2852 | 0.3300 | -0.0739         | 0.0728   | 0.3435  | 9.3572 | 0.3131 | 629.0414          |
| CardioEmbolicStroke | MF0012  | Weighted median           | 9    | 0.0133  | 0.0536 | 0.8046 | -0.0739         | 0.0728   | 0.3435  | 9.3572 | 0.3131 | 629.0414          |
| CardioEmbolicStroke | MF0012  | Inverse variance weighted | 9    | 0.0122  | 0.0437 | 0.7799 | -0.0739         | 0.0728   | 0.3435  | 9.3572 | 0.3131 | 629.0414          |

|                     |        |                           |   |         |        |        |         |        |        |         |        |           |
|---------------------|--------|---------------------------|---|---------|--------|--------|---------|--------|--------|---------|--------|-----------|
| CardioEmbolicStroke | MF0012 | Simple mode               | 9 | 0.0150  | 0.0848 | 0.8640 | -0.0739 | 0.0728 | 0.3435 | 9.3572  | 0.3131 | 629.0414  |
| CardioEmbolicStroke | MF0012 | Weighted mode             | 9 | 0.0093  | 0.0727 | 0.9015 | -0.0739 | 0.0728 | 0.3435 | 9.3572  | 0.3131 | 629.0414  |
| CardioEmbolicStroke | MF0013 | MR Egger                  | 9 | 0.0056  | 0.0390 | 0.8907 | -0.0021 | 0.0100 | 0.8391 | 4.2689  | 0.7483 | 9411.9917 |
| CardioEmbolicStroke | MF0013 | Weighted median           | 9 | -0.0019 | 0.0076 | 0.8018 | -0.0021 | 0.0100 | 0.8391 | 4.2689  | 0.7483 | 9411.9917 |
| CardioEmbolicStroke | MF0013 | Inverse variance weighted | 9 | -0.0026 | 0.0060 | 0.6671 | -0.0021 | 0.0100 | 0.8391 | 4.2689  | 0.7483 | 9411.9917 |
| CardioEmbolicStroke | MF0013 | Simple mode               | 9 | -0.0056 | 0.0120 | 0.6513 | -0.0021 | 0.0100 | 0.8391 | 4.2689  | 0.7483 | 9411.9917 |
| CardioEmbolicStroke | MF0013 | Weighted mode             | 9 | -0.0034 | 0.0110 | 0.7643 | -0.0021 | 0.0100 | 0.8391 | 4.2689  | 0.7483 | 9411.9917 |
| CardioEmbolicStroke | MF0014 | MR Egger                  | 9 | -0.1151 | 0.1038 | 0.3039 | 0.0294  | 0.0265 | 0.3029 | 11.4169 | 0.1792 | 2060.5881 |
| CardioEmbolicStroke | MF0014 | Weighted median           | 9 | 0.0006  | 0.0190 | 0.9756 | 0.0294  | 0.0265 | 0.3029 | 11.4169 | 0.1792 | 2060.5881 |
| CardioEmbolicStroke | MF0014 | Inverse variance weighted | 9 | -0.0011 | 0.0161 | 0.9454 | 0.0294  | 0.0265 | 0.3029 | 11.4169 | 0.1792 | 2060.5881 |
| CardioEmbolicStroke | MF0014 | Simple mode               | 9 | 0.0199  | 0.0320 | 0.5512 | 0.0294  | 0.0265 | 0.3029 | 11.4169 | 0.1792 | 2060.5881 |
| CardioEmbolicStroke | MF0014 | Weighted mode             | 9 | 0.0122  | 0.0269 | 0.6616 | 0.0294  | 0.0265 | 0.3029 | 11.4169 | 0.1792 | 2060.5881 |
| CardioEmbolicStroke | MF0015 | MR Egger                  | 9 | 0.2916  | 0.1775 | 0.1443 | -0.0702 | 0.0453 | 0.1651 | 7.2430  | 0.5107 | 1293.5594 |
| CardioEmbolicStroke | MF0015 | Weighted median           | 9 | 0.0352  | 0.0361 | 0.3297 | -0.0702 | 0.0453 | 0.1651 | 7.2430  | 0.5107 | 1293.5594 |
| CardioEmbolicStroke | MF0015 | Inverse variance weighted | 9 | 0.0198  | 0.0271 | 0.4657 | -0.0702 | 0.0453 | 0.1651 | 7.2430  | 0.5107 | 1293.5594 |
| CardioEmbolicStroke | MF0015 | Simple mode               | 9 | 0.0429  | 0.0576 | 0.4776 | -0.0702 | 0.0453 | 0.1651 | 7.2430  | 0.5107 | 1293.5594 |
| CardioEmbolicStroke | MF0015 | Weighted mode             | 9 | 0.0450  | 0.0519 | 0.4113 | -0.0702 | 0.0453 | 0.1651 | 7.2430  | 0.5107 | 1293.5594 |
| CardioEmbolicStroke | MF0016 | MR Egger                  | 9 | -0.2233 | 0.1464 | 0.1709 | 0.0634  | 0.0373 | 0.1335 | 8.8319  | 0.3567 | 1392.8227 |
| CardioEmbolicStroke | MF0016 | Weighted median           | 9 | 0.0313  | 0.0320 | 0.3283 | 0.0634  | 0.0373 | 0.1335 | 8.8319  | 0.3567 | 1392.8227 |
| CardioEmbolicStroke | MF0016 | Inverse variance weighted | 9 | 0.0221  | 0.0235 | 0.3462 | 0.0634  | 0.0373 | 0.1335 | 8.8319  | 0.3567 | 1392.8227 |
| CardioEmbolicStroke | MF0016 | Simple mode               | 9 | 0.0607  | 0.0575 | 0.3221 | 0.0634  | 0.0373 | 0.1335 | 8.8319  | 0.3567 | 1392.8227 |
| CardioEmbolicStroke | MF0016 | Weighted mode             | 9 | 0.0552  | 0.0600 | 0.3848 | 0.0634  | 0.0373 | 0.1335 | 8.8319  | 0.3567 | 1392.8227 |
| CardioEmbolicStroke | MF0017 | MR Egger                  | 9 | -0.0782 | 0.0436 | 0.1160 | 0.0171  | 0.0111 | 0.1689 | 5.1851  | 0.7376 | 5107.1479 |
| CardioEmbolicStroke | MF0017 | Weighted median           | 9 | -0.0193 | 0.0084 | 0.0216 | 0.0171  | 0.0111 | 0.1689 | 5.1851  | 0.7376 | 5107.1479 |
| CardioEmbolicStroke | MF0017 | Inverse variance weighted | 9 | -0.0121 | 0.0067 | 0.0693 | 0.0171  | 0.0111 | 0.1689 | 5.1851  | 0.7376 | 5107.1479 |
| CardioEmbolicStroke | MF0017 | Simple mode               | 9 | -0.0210 | 0.0148 | 0.1937 | 0.0171  | 0.0111 | 0.1689 | 5.1851  | 0.7376 | 5107.1479 |
| CardioEmbolicStroke | MF0017 | Weighted mode             | 9 | -0.0213 | 0.0135 | 0.1529 | 0.0171  | 0.0111 | 0.1689 | 5.1851  | 0.7376 | 5107.1479 |
| CardioEmbolicStroke | MF0018 | MR Egger                  | 9 | -0.0896 | 0.0491 | 0.1106 | 0.0237  | 0.0125 | 0.1001 | 7.9556  | 0.4378 | 4342.7435 |
| CardioEmbolicStroke | MF0018 | Weighted median           | 9 | 0.0053  | 0.0103 | 0.6056 | 0.0237  | 0.0125 | 0.1001 | 7.9556  | 0.4378 | 4342.7435 |
| CardioEmbolicStroke | MF0018 | Inverse variance weighted | 9 | 0.0023  | 0.0075 | 0.7640 | 0.0237  | 0.0125 | 0.1001 | 7.9556  | 0.4378 | 4342.7435 |
| CardioEmbolicStroke | MF0018 | Simple mode               | 9 | 0.0115  | 0.0160 | 0.4928 | 0.0237  | 0.0125 | 0.1001 | 7.9556  | 0.4378 | 4342.7435 |
| CardioEmbolicStroke | MF0018 | Weighted mode             | 9 | 0.0125  | 0.0159 | 0.4542 | 0.0237  | 0.0125 | 0.1001 | 7.9556  | 0.4378 | 4342.7435 |
| CardioEmbolicStroke | MF0019 | MR Egger                  | 9 | -0.1210 | 0.1083 | 0.3008 | 0.0308  | 0.0276 | 0.3020 | 7.1419  | 0.5214 | 2438.2774 |
| CardioEmbolicStroke | MF0019 | Weighted median           | 9 | 0.0054  | 0.0224 | 0.8082 | 0.0308  | 0.0276 | 0.3020 | 7.1419  | 0.5214 | 2438.2774 |
| CardioEmbolicStroke | MF0019 | Inverse variance weighted | 9 | -0.0018 | 0.0166 | 0.9157 | 0.0308  | 0.0276 | 0.3020 | 7.1419  | 0.5214 | 2438.2774 |
| CardioEmbolicStroke | MF0019 | Simple mode               | 9 | 0.0088  | 0.0368 | 0.8179 | 0.0308  | 0.0276 | 0.3020 | 7.1419  | 0.5214 | 2438.2774 |
| CardioEmbolicStroke | MF0019 | Weighted mode             | 9 | 0.0088  | 0.0349 | 0.8083 | 0.0308  | 0.0276 | 0.3020 | 7.1419  | 0.5214 | 2438.2774 |
| CardioEmbolicStroke | MF0020 | MR Egger                  | 9 | 0.0546  | 0.1867 | 0.7783 | -0.0097 | 0.0476 | 0.8447 | 8.8474  | 0.2638 | 1085.4320 |
| CardioEmbolicStroke | MF0020 | Weighted median           | 9 | 0.0312  | 0.0349 | 0.3712 | -0.0097 | 0.0476 | 0.8447 | 8.8474  | 0.2638 | 1085.4320 |
| CardioEmbolicStroke | MF0020 | Inverse variance weighted | 9 | 0.0171  | 0.0268 | 0.5225 | -0.0097 | 0.0476 | 0.8447 | 8.8474  | 0.2638 | 1085.4320 |
| CardioEmbolicStroke | MF0020 | Simple mode               | 9 | 0.0376  | 0.0590 | 0.5424 | -0.0097 | 0.0476 | 0.8447 | 8.8474  | 0.2638 | 1085.4320 |
| CardioEmbolicStroke | MF0020 | Weighted mode             | 9 | 0.0309  | 0.0586 | 0.6119 | -0.0097 | 0.0476 | 0.8447 | 8.8474  | 0.2638 | 1085.4320 |
| CardioEmbolicStroke | MF0021 | MR Egger                  | 9 | -0.0924 | 0.0681 | 0.2169 | 0.0244  | 0.0174 | 0.2038 | 7.7619  | 0.4571 | 3786.1613 |
| CardioEmbolicStroke | MF0021 | Weighted median           | 9 | 0.0085  | 0.0142 | 0.5526 | 0.0244  | 0.0174 | 0.2038 | 7.7619  | 0.4571 | 3786.1613 |
| CardioEmbolicStroke | MF0021 | Inverse variance weighted | 9 | 0.0019  | 0.0104 | 0.8531 | 0.0244  | 0.0174 | 0.2038 | 7.7619  | 0.4571 | 3786.1613 |
| CardioEmbolicStroke | MF0021 | Simple mode               | 9 | 0.0269  | 0.0268 | 0.3446 | 0.0244  | 0.0174 | 0.2038 | 7.7619  | 0.4571 | 3786.1613 |
| CardioEmbolicStroke | MF0021 | Weighted mode             | 9 | 0.0257  | 0.0247 | 0.3279 | 0.0244  | 0.0174 | 0.2038 | 7.7619  | 0.4571 | 3786.1613 |
| CardioEmbolicStroke | MF0022 | MR Egger                  | 9 | -0.0620 | 0.0676 | 0.3892 | 0.0127  | 0.0172 | 0.4865 | 7.8000  | 0.3506 | 2669.5367 |
| CardioEmbolicStroke | MF0022 | Weighted median           | 9 | -0.0125 | 0.0138 | 0.3653 | 0.0127  | 0.0172 | 0.4865 | 7.8000  | 0.3506 | 2669.5367 |
| CardioEmbolicStroke | MF0022 | Inverse variance weighted | 9 | -0.0130 | 0.0100 | 0.1958 | 0.0127  | 0.0172 | 0.4865 | 7.8000  | 0.3506 | 2669.5367 |
| CardioEmbolicStroke | MF0022 | Simple mode               | 9 | -0.0112 | 0.0213 | 0.6125 | 0.0127  | 0.0172 | 0.4865 | 7.8000  | 0.3506 | 2669.5367 |
| CardioEmbolicStroke | MF0022 | Weighted mode             | 9 | -0.0132 | 0.0204 | 0.5344 | 0.0127  | 0.0172 | 0.4865 | 7.8000  | 0.3506 | 2669.5367 |
| CardioEmbolicStroke | MF0024 | MR Egger                  | 9 | 0.2165  | 0.5665 | 0.7136 | -0.1007 | 0.1445 | 0.5084 | 3.3829  | 0.8475 | 247.3000  |
| CardioEmbolicStroke | MF0024 | Weighted median           | 9 | -0.1662 | 0.1110 | 0.1342 | -0.1007 | 0.1445 | 0.5084 | 3.3829  | 0.8475 | 247.3000  |
| CardioEmbolicStroke | MF0024 | Inverse variance weighted | 9 | -0.1736 | 0.0866 | 0.0450 | -0.1007 | 0.1445 | 0.5084 | 3.3829  | 0.8475 | 247.3000  |
| CardioEmbolicStroke | MF0024 | Simple mode               | 9 | -0.1483 | 0.1765 | 0.4250 | -0.1007 | 0.1445 | 0.5084 | 3.3829  | 0.8475 | 247.3000  |
| CardioEmbolicStroke | MF0024 | Weighted mode             | 9 | -0.1388 | 0.1706 | 0.4392 | -0.1007 | 0.1445 | 0.5084 | 3.3829  | 0.8475 | 247.3000  |
| CardioEmbolicStroke | MF0025 | MR Egger                  | 9 | 0.4227  | 0.2732 | 0.1657 | -0.1055 | 0.0697 | 0.1739 | 9.0724  | 0.3362 | 483.8716  |
| CardioEmbolicStroke | MF0025 | Weighted median           | 9 | 0.0171  | 0.0574 | 0.7665 | -0.1055 | 0.0697 | 0.1739 | 9.0724  | 0.3362 | 483.8716  |
| CardioEmbolicStroke | MF0025 | Inverse variance weighted | 9 | 0.0141  | 0.0445 | 0.7504 | -0.1055 | 0.0697 | 0.1739 | 9.0724  | 0.3362 | 483.8716  |
| CardioEmbolicStroke | MF0025 | Simple mode               | 9 | 0.0290  | 0.0964 | 0.7712 | -0.1055 | 0.0697 | 0.1739 | 9.0724  | 0.3362 | 483.8716  |

|                     |        |                           |   |         |        |        |         |        |        |         |        |           |
|---------------------|--------|---------------------------|---|---------|--------|--------|---------|--------|--------|---------|--------|-----------|
| CardioEmbolicStroke | MF0025 | Weighted mode             | 9 | 0.0162  | 0.0820 | 0.8479 | -0.1055 | 0.0697 | 0.1739 | 9.0724  | 0.3362 | 483.8716  |
| CardioEmbolicStroke | MF0026 | MR Egger                  | 9 | -0.0505 | 0.0579 | 0.4118 | 0.0189  | 0.0148 | 0.2407 | 12.5149 | 0.1297 | 3177.8052 |
| CardioEmbolicStroke | MF0026 | Weighted median           | 9 | 0.0129  | 0.0109 | 0.2365 | 0.0189  | 0.0148 | 0.2407 | 12.5149 | 0.1297 | 3177.8052 |
| CardioEmbolicStroke | MF0026 | Inverse variance weighted | 9 | 0.0228  | 0.0092 | 0.0130 | 0.0189  | 0.0148 | 0.2407 | 12.5149 | 0.1297 | 3177.8052 |
| CardioEmbolicStroke | MF0026 | Simple mode               | 9 | 0.0055  | 0.0185 | 0.7748 | 0.0189  | 0.0148 | 0.2407 | 12.5149 | 0.1297 | 3177.8052 |
| CardioEmbolicStroke | MF0026 | Weighted mode             | 9 | 0.0041  | 0.0134 | 0.7676 | 0.0189  | 0.0148 | 0.2407 | 12.5149 | 0.1297 | 3177.8052 |
| CardioEmbolicStroke | MF0027 | MR Egger                  | 9 | 0.0401  | 0.3530 | 0.9128 | -0.0079 | 0.0901 | 0.9329 | 2.1884  | 0.9487 | 1207.6463 |
| CardioEmbolicStroke | MF0027 | Weighted median           | 9 | 0.0359  | 0.0686 | 0.6006 | -0.0079 | 0.0901 | 0.9329 | 2.1884  | 0.9487 | 1207.6463 |
| CardioEmbolicStroke | MF0027 | Inverse variance weighted | 9 | 0.0096  | 0.0540 | 0.8583 | -0.0079 | 0.0901 | 0.9329 | 2.1884  | 0.9487 | 1207.6463 |
| CardioEmbolicStroke | MF0027 | Simple mode               | 9 | 0.0380  | 0.1074 | 0.7327 | -0.0079 | 0.0901 | 0.9329 | 2.1884  | 0.9487 | 1207.6463 |
| CardioEmbolicStroke | MF0027 | Weighted mode             | 9 | 0.0490  | 0.1071 | 0.6591 | -0.0079 | 0.0901 | 0.9329 | 2.1884  | 0.9487 | 1207.6463 |
| CardioEmbolicStroke | MF0028 | MR Egger                  | 9 | -0.1830 | 0.0729 | 0.0404 | 0.0499  | 0.0186 | 0.0314 | 12.4877 | 0.1307 | 2822.6228 |
| CardioEmbolicStroke | MF0028 | Weighted median           | 9 | 0.0180  | 0.0156 | 0.2501 | 0.0499  | 0.0186 | 0.0314 | 12.4877 | 0.1307 | 2822.6228 |
| CardioEmbolicStroke | MF0028 | Inverse variance weighted | 9 | 0.0103  | 0.0139 | 0.4603 | 0.0499  | 0.0186 | 0.0314 | 12.4877 | 0.1307 | 2822.6228 |
| CardioEmbolicStroke | MF0028 | Simple mode               | 9 | 0.0171  | 0.0234 | 0.4848 | 0.0499  | 0.0186 | 0.0314 | 12.4877 | 0.1307 | 2822.6228 |
| CardioEmbolicStroke | MF0028 | Weighted mode             | 9 | 0.0162  | 0.0250 | 0.5352 | 0.0499  | 0.0186 | 0.0314 | 12.4877 | 0.1307 | 2822.6228 |
| CardioEmbolicStroke | MF0029 | MR Egger                  | 9 | -0.1615 | 0.1905 | 0.4246 | 0.0352  | 0.0486 | 0.4930 | 14.9640 | 0.0365 | 1213.7421 |
| CardioEmbolicStroke | MF0029 | Weighted median           | 9 | -0.0260 | 0.0285 | 0.3617 | 0.0352  | 0.0486 | 0.4930 | 14.9640 | 0.0365 | 1213.7421 |
| CardioEmbolicStroke | MF0029 | Inverse variance weighted | 9 | -0.0254 | 0.0282 | 0.3690 | 0.0352  | 0.0486 | 0.4930 | 14.9640 | 0.0365 | 1213.7421 |
| CardioEmbolicStroke | MF0029 | Simple mode               | 9 | -0.0254 | 0.0491 | 0.6189 | 0.0352  | 0.0486 | 0.4930 | 14.9640 | 0.0365 | 1213.7421 |
| CardioEmbolicStroke | MF0029 | Weighted mode             | 9 | -0.0405 | 0.0436 | 0.3800 | 0.0352  | 0.0486 | 0.4930 | 14.9640 | 0.0365 | 1213.7421 |
| CardioEmbolicStroke | MF0030 | MR Egger                  | 9 | 0.0621  | 0.2065 | 0.7722 | -0.0207 | 0.0527 | 0.7061 | 3.4882  | 0.8365 | 1687.2224 |
| CardioEmbolicStroke | MF0030 | Weighted median           | 9 | -0.0008 | 0.0409 | 0.9837 | -0.0207 | 0.0527 | 0.7061 | 3.4882  | 0.8365 | 1687.2224 |
| CardioEmbolicStroke | MF0030 | Inverse variance weighted | 9 | -0.0180 | 0.0316 | 0.5677 | -0.0207 | 0.0527 | 0.7061 | 3.4882  | 0.8365 | 1687.2224 |
| CardioEmbolicStroke | MF0030 | Simple mode               | 9 | 0.0198  | 0.0589 | 0.7453 | -0.0207 | 0.0527 | 0.7061 | 3.4882  | 0.8365 | 1687.2224 |
| CardioEmbolicStroke | MF0030 | Weighted mode             | 9 | 0.0214  | 0.0632 | 0.7430 | -0.0207 | 0.0527 | 0.7061 | 3.4882  | 0.8365 | 1687.2224 |
| CardioEmbolicStroke | MF0031 | MR Egger                  | 9 | 0.2918  | 0.2897 | 0.3474 | -0.0737 | 0.0739 | 0.3521 | 7.1645  | 0.5190 | 509.8327  |
| CardioEmbolicStroke | MF0031 | Weighted median           | 9 | 0.0110  | 0.0587 | 0.8511 | -0.0737 | 0.0739 | 0.3521 | 7.1645  | 0.5190 | 509.8327  |
| CardioEmbolicStroke | MF0031 | Inverse variance weighted | 9 | 0.0064  | 0.0443 | 0.8853 | -0.0737 | 0.0739 | 0.3521 | 7.1645  | 0.5190 | 509.8327  |
| CardioEmbolicStroke | MF0031 | Simple mode               | 9 | 0.0255  | 0.0937 | 0.7927 | -0.0737 | 0.0739 | 0.3521 | 7.1645  | 0.5190 | 509.8327  |
| CardioEmbolicStroke | MF0031 | Weighted mode             | 9 | 0.0003  | 0.0821 | 0.9971 | -0.0737 | 0.0739 | 0.3521 | 7.1645  | 0.5190 | 509.8327  |
| CardioEmbolicStroke | MF0032 | MR Egger                  | 9 | -0.4881 | 0.4888 | 0.3512 | 0.1448  | 0.1247 | 0.2835 | 5.9466  | 0.6532 | 351.5603  |
| CardioEmbolicStroke | MF0032 | Weighted median           | 9 | -0.0247 | 0.1012 | 0.8072 | 0.1448  | 0.1247 | 0.2835 | 5.9466  | 0.6532 | 351.5603  |
| CardioEmbolicStroke | MF0032 | Inverse variance weighted | 9 | 0.0729  | 0.0747 | 0.3289 | 0.1448  | 0.1247 | 0.2835 | 5.9466  | 0.6532 | 351.5603  |
| CardioEmbolicStroke | MF0032 | Simple mode               | 9 | -0.0440 | 0.1783 | 0.8114 | 0.1448  | 0.1247 | 0.2835 | 5.9466  | 0.6532 | 351.5603  |
| CardioEmbolicStroke | MF0032 | Weighted mode             | 9 | -0.0583 | 0.1441 | 0.6963 | 0.1448  | 0.1247 | 0.2835 | 5.9466  | 0.6532 | 351.5603  |
| CardioEmbolicStroke | MF0033 | MR Egger                  | 9 | 0.0198  | 0.0454 | 0.6758 | -0.0060 | 0.0116 | 0.6212 | 4.4170  | 0.7307 | 7276.5278 |
| CardioEmbolicStroke | MF0033 | Weighted median           | 9 | -0.0049 | 0.0088 | 0.5753 | -0.0060 | 0.0116 | 0.6212 | 4.4170  | 0.7307 | 7276.5278 |
| CardioEmbolicStroke | MF0033 | Inverse variance weighted | 9 | -0.0034 | 0.0069 | 0.6258 | -0.0060 | 0.0116 | 0.6212 | 4.4170  | 0.7307 | 7276.5278 |
| CardioEmbolicStroke | MF0033 | Simple mode               | 9 | -0.0115 | 0.0150 | 0.4649 | -0.0060 | 0.0116 | 0.6212 | 4.4170  | 0.7307 | 7276.5278 |
| CardioEmbolicStroke | MF0033 | Weighted mode             | 9 | 0.0099  | 0.0141 | 0.5046 | -0.0060 | 0.0116 | 0.6212 | 4.4170  | 0.7307 | 7276.5278 |
| CardioEmbolicStroke | MF0034 | MR Egger                  | 9 | -0.0521 | 0.1859 | 0.7874 | 0.0074  | 0.0474 | 0.8797 | 12.7849 | 0.0775 | 1173.7884 |
| CardioEmbolicStroke | MF0034 | Weighted median           | 9 | -0.0299 | 0.0286 | 0.2944 | 0.0074  | 0.0474 | 0.8797 | 12.7849 | 0.0775 | 1173.7884 |
| CardioEmbolicStroke | MF0034 | Inverse variance weighted | 9 | -0.0233 | 0.0266 | 0.3820 | 0.0074  | 0.0474 | 0.8797 | 12.7849 | 0.0775 | 1173.7884 |
| CardioEmbolicStroke | MF0034 | Simple mode               | 9 | -0.0419 | 0.0452 | 0.3812 | 0.0074  | 0.0474 | 0.8797 | 12.7849 | 0.0775 | 1173.7884 |
| CardioEmbolicStroke | MF0034 | Weighted mode             | 9 | -0.0378 | 0.0399 | 0.3701 | 0.0074  | 0.0474 | 0.8797 | 12.7849 | 0.0775 | 1173.7884 |
| CardioEmbolicStroke | MF0035 | MR Egger                  | 9 | -0.0140 | 0.2328 | 0.9538 | 0.0079  | 0.0594 | 0.8975 | 11.1641 | 0.1316 | 808.3074  |
| CardioEmbolicStroke | MF0035 | Weighted median           | 9 | 0.0117  | 0.0397 | 0.7688 | 0.0079  | 0.0594 | 0.8975 | 11.1641 | 0.1316 | 808.3074  |
| CardioEmbolicStroke | MF0035 | Inverse variance weighted | 9 | 0.0167  | 0.0333 | 0.6155 | 0.0079  | 0.0594 | 0.8975 | 11.1641 | 0.1316 | 808.3074  |
| CardioEmbolicStroke | MF0035 | Simple mode               | 9 | 0.0409  | 0.0706 | 0.5785 | 0.0079  | 0.0594 | 0.8975 | 11.1641 | 0.1316 | 808.3074  |
| CardioEmbolicStroke | MF0035 | Weighted mode             | 9 | -0.0053 | 0.0591 | 0.9308 | 0.0079  | 0.0594 | 0.8975 | 11.1641 | 0.1316 | 808.3074  |
| CardioEmbolicStroke | MF0036 | MR Egger                  | 9 | 0.1722  | 0.1292 | 0.2241 | -0.0430 | 0.0329 | 0.2331 | 7.6799  | 0.4653 | 1830.4889 |
| CardioEmbolicStroke | MF0036 | Weighted median           | 9 | 0.0041  | 0.0265 | 0.8764 | -0.0430 | 0.0329 | 0.2331 | 7.6799  | 0.4653 | 1830.4889 |
| CardioEmbolicStroke | MF0036 | Inverse variance weighted | 9 | 0.0056  | 0.0197 | 0.7750 | -0.0430 | 0.0329 | 0.2331 | 7.6799  | 0.4653 | 1830.4889 |
| CardioEmbolicStroke | MF0036 | Simple mode               | 9 | 0.0078  | 0.0424 | 0.8587 | -0.0430 | 0.0329 | 0.2331 | 7.6799  | 0.4653 | 1830.4889 |
| CardioEmbolicStroke | MF0036 | Weighted mode             | 9 | 0.0078  | 0.0377 | 0.8411 | -0.0430 | 0.0329 | 0.2331 | 7.6799  | 0.4653 | 1830.4889 |
| CardioEmbolicStroke | MF0037 | MR Egger                  | 9 | 0.0384  | 0.2433 | 0.8792 | 0.0014  | 0.0621 | 0.9832 | 8.2470  | 0.3113 | 761.5486  |
| CardioEmbolicStroke | MF0037 | Weighted median           | 9 | 0.0613  | 0.0435 | 0.1593 | 0.0014  | 0.0621 | 0.9832 | 8.2470  | 0.3113 | 761.5486  |
| CardioEmbolicStroke | MF0037 | Inverse variance weighted | 9 | 0.0436  | 0.0348 | 0.2100 | 0.0014  | 0.0621 | 0.9832 | 8.2470  | 0.3113 | 761.5486  |
| CardioEmbolicStroke | MF0037 | Simple mode               | 9 | 0.0794  | 0.0687 | 0.2811 | 0.0014  | 0.0621 | 0.9832 | 8.2470  | 0.3113 | 761.5486  |
| CardioEmbolicStroke | MF0037 | Weighted mode             | 9 | 0.0758  | 0.0690 | 0.3042 | 0.0014  | 0.0621 | 0.9832 | 8.2470  | 0.3113 | 761.5486  |

|                     |        |                           |   |         |        |        |         |        |        |         |        |           |
|---------------------|--------|---------------------------|---|---------|--------|--------|---------|--------|--------|---------|--------|-----------|
| CardioEmbolicStroke | MF0038 | MR Egger                  | 9 | 0.0041  | 0.0610 | 0.9478 | -0.0047 | 0.0156 | 0.7695 | 6.5175  | 0.4808 | 4260.2760 |
| CardioEmbolicStroke | MF0038 | Weighted median           | 9 | -0.0142 | 0.0126 | 0.2623 | -0.0047 | 0.0156 | 0.7695 | 6.5175  | 0.4808 | 4260.2760 |
| CardioEmbolicStroke | MF0038 | Inverse variance weighted | 9 | -0.0142 | 0.0093 | 0.1270 | -0.0047 | 0.0156 | 0.7695 | 6.5175  | 0.4808 | 4260.2760 |
| CardioEmbolicStroke | MF0038 | Simple mode               | 9 | -0.0297 | 0.0191 | 0.1580 | -0.0047 | 0.0156 | 0.7695 | 6.5175  | 0.4808 | 4260.2760 |
| CardioEmbolicStroke | MF0038 | Weighted mode             | 9 | -0.0097 | 0.0197 | 0.6375 | -0.0047 | 0.0156 | 0.7695 | 6.5175  | 0.4808 | 4260.2760 |
| CardioEmbolicStroke | MF0039 | MR Egger                  | 9 | -0.0602 | 0.3010 | 0.8471 | 0.0191  | 0.0768 | 0.8111 | 3.4682  | 0.8386 | 937.9723  |
| CardioEmbolicStroke | MF0039 | Weighted median           | 9 | 0.0064  | 0.0559 | 0.9087 | 0.0191  | 0.0768 | 0.8111 | 3.4682  | 0.8386 | 937.9723  |
| CardioEmbolicStroke | MF0039 | Inverse variance weighted | 9 | 0.0136  | 0.0460 | 0.7680 | 0.0191  | 0.0768 | 0.8111 | 3.4682  | 0.8386 | 937.9723  |
| CardioEmbolicStroke | MF0039 | Simple mode               | 9 | 0.0046  | 0.0947 | 0.9623 | 0.0191  | 0.0768 | 0.8111 | 3.4682  | 0.8386 | 937.9723  |
| CardioEmbolicStroke | MF0039 | Weighted mode             | 9 | -0.0379 | 0.0931 | 0.6942 | 0.0191  | 0.0768 | 0.8111 | 3.4682  | 0.8386 | 937.9723  |
| CardioEmbolicStroke | MF0040 | MR Egger                  | 9 | 0.2680  | 0.3110 | 0.4174 | -0.0708 | 0.0793 | 0.4017 | 4.0958  | 0.7687 | 597.2015  |
| CardioEmbolicStroke | MF0040 | Weighted median           | 9 | -0.0356 | 0.0639 | 0.5778 | -0.0708 | 0.0793 | 0.4017 | 4.0958  | 0.7687 | 597.2015  |
| CardioEmbolicStroke | MF0040 | Inverse variance weighted | 9 | -0.0064 | 0.0475 | 0.8934 | -0.0708 | 0.0793 | 0.4017 | 4.0958  | 0.7687 | 597.2015  |
| CardioEmbolicStroke | MF0040 | Simple mode               | 9 | -0.0152 | 0.0957 | 0.8775 | -0.0708 | 0.0793 | 0.4017 | 4.0958  | 0.7687 | 597.2015  |
| CardioEmbolicStroke | MF0040 | Weighted mode             | 9 | -0.0373 | 0.0841 | 0.6693 | -0.0708 | 0.0793 | 0.4017 | 4.0958  | 0.7687 | 597.2015  |
| CardioEmbolicStroke | MF0041 | MR Egger                  | 9 | 0.1689  | 0.1663 | 0.3436 | -0.0436 | 0.0424 | 0.3386 | 9.1271  | 0.3317 | 1430.0559 |
| CardioEmbolicStroke | MF0041 | Weighted median           | 9 | 0.0002  | 0.0319 | 0.9953 | -0.0436 | 0.0424 | 0.3386 | 9.1271  | 0.3317 | 1430.0559 |
| CardioEmbolicStroke | MF0041 | Inverse variance weighted | 9 | 0.0002  | 0.0255 | 0.9952 | -0.0436 | 0.0424 | 0.3386 | 9.1271  | 0.3317 | 1430.0559 |
| CardioEmbolicStroke | MF0041 | Simple mode               | 9 | 0.0069  | 0.0502 | 0.8940 | -0.0436 | 0.0424 | 0.3386 | 9.1271  | 0.3317 | 1430.0559 |
| CardioEmbolicStroke | MF0041 | Weighted mode             | 9 | 0.0060  | 0.0457 | 0.8994 | -0.0436 | 0.0424 | 0.3386 | 9.1271  | 0.3317 | 1430.0559 |
| CardioEmbolicStroke | MF0043 | MR Egger                  | 9 | 0.3282  | 0.1940 | 0.1345 | -0.0806 | 0.0495 | 0.1472 | 12.2220 | 0.1416 | 1021.6251 |
| CardioEmbolicStroke | MF0043 | Weighted median           | 9 | 0.0259  | 0.0375 | 0.4900 | -0.0806 | 0.0495 | 0.1472 | 12.2220 | 0.1416 | 1021.6251 |
| CardioEmbolicStroke | MF0043 | Inverse variance weighted | 9 | 0.0158  | 0.0326 | 0.6281 | -0.0806 | 0.0495 | 0.1472 | 12.2220 | 0.1416 | 1021.6251 |
| CardioEmbolicStroke | MF0043 | Simple mode               | 9 | 0.0305  | 0.0617 | 0.6344 | -0.0806 | 0.0495 | 0.1472 | 12.2220 | 0.1416 | 1021.6251 |
| CardioEmbolicStroke | MF0043 | Weighted mode             | 9 | 0.0372  | 0.0522 | 0.4964 | -0.0806 | 0.0495 | 0.1472 | 12.2220 | 0.1416 | 1021.6251 |
| CardioEmbolicStroke | MF0044 | MR Egger                  | 9 | -0.0626 | 0.0552 | 0.2947 | 0.0170  | 0.0141 | 0.2658 | 10.1354 | 0.2556 | 4907.6301 |
| CardioEmbolicStroke | MF0044 | Weighted median           | 9 | 0.0044  | 0.0107 | 0.6849 | 0.0170  | 0.0141 | 0.2658 | 10.1354 | 0.2556 | 4907.6301 |
| CardioEmbolicStroke | MF0044 | Inverse variance weighted | 9 | 0.0035  | 0.0087 | 0.6898 | 0.0170  | 0.0141 | 0.2658 | 10.1354 | 0.2556 | 4907.6301 |
| CardioEmbolicStroke | MF0044 | Simple mode               | 9 | 0.0131  | 0.0167 | 0.4572 | 0.0170  | 0.0141 | 0.2658 | 10.1354 | 0.2556 | 4907.6301 |
| CardioEmbolicStroke | MF0044 | Weighted mode             | 9 | 0.0118  | 0.0176 | 0.5234 | 0.0170  | 0.0141 | 0.2658 | 10.1354 | 0.2556 | 4907.6301 |
| CardioEmbolicStroke | MF0045 | MR Egger                  | 9 | -0.1491 | 0.0663 | 0.0593 | 0.0395  | 0.0169 | 0.0522 | 11.6173 | 0.1691 | 3350.1196 |
| CardioEmbolicStroke | MF0045 | Weighted median           | 9 | 0.0034  | 0.0136 | 0.8053 | 0.0395  | 0.0169 | 0.0522 | 11.6173 | 0.1691 | 3350.1196 |
| CardioEmbolicStroke | MF0045 | Inverse variance weighted | 9 | 0.0039  | 0.0122 | 0.7484 | 0.0395  | 0.0169 | 0.0522 | 11.6173 | 0.1691 | 3350.1196 |
| CardioEmbolicStroke | MF0045 | Simple mode               | 9 | 0.0065  | 0.0236 | 0.7894 | 0.0395  | 0.0169 | 0.0522 | 11.6173 | 0.1691 | 3350.1196 |
| CardioEmbolicStroke | MF0045 | Weighted mode             | 9 | 0.0057  | 0.0256 | 0.8294 | 0.0395  | 0.0169 | 0.0522 | 11.6173 | 0.1691 | 3350.1196 |
| CardioEmbolicStroke | MF0046 | MR Egger                  | 9 | 0.2540  | 0.2745 | 0.3856 | -0.0614 | 0.0700 | 0.4098 | 9.0019  | 0.2525 | 460.7762  |
| CardioEmbolicStroke | MF0046 | Weighted median           | 9 | -0.0150 | 0.0478 | 0.7542 | -0.0614 | 0.0700 | 0.4098 | 9.0019  | 0.2525 | 460.7762  |
| CardioEmbolicStroke | MF0046 | Inverse variance weighted | 9 | 0.0162  | 0.0414 | 0.6950 | -0.0614 | 0.0700 | 0.4098 | 9.0019  | 0.2525 | 460.7762  |
| CardioEmbolicStroke | MF0046 | Simple mode               | 9 | -0.0348 | 0.0697 | 0.6314 | -0.0614 | 0.0700 | 0.4098 | 9.0019  | 0.2525 | 460.7762  |
| CardioEmbolicStroke | MF0046 | Weighted mode             | 9 | -0.0423 | 0.0620 | 0.5140 | -0.0614 | 0.0700 | 0.4098 | 9.0019  | 0.2525 | 460.7762  |
| CardioEmbolicStroke | MF0047 | MR Egger                  | 9 | -0.1063 | 0.0744 | 0.1964 | 0.0237  | 0.0190 | 0.2530 | 7.3712  | 0.4972 | 2135.4118 |
| CardioEmbolicStroke | MF0047 | Weighted median           | 9 | -0.0098 | 0.0144 | 0.4972 | 0.0237  | 0.0190 | 0.2530 | 7.3712  | 0.4972 | 2135.4118 |
| CardioEmbolicStroke | MF0047 | Inverse variance weighted | 9 | -0.0146 | 0.0114 | 0.1981 | 0.0237  | 0.0190 | 0.2530 | 7.3712  | 0.4972 | 2135.4118 |
| CardioEmbolicStroke | MF0047 | Simple mode               | 9 | -0.0126 | 0.0209 | 0.5638 | 0.0237  | 0.0190 | 0.2530 | 7.3712  | 0.4972 | 2135.4118 |
| CardioEmbolicStroke | MF0047 | Weighted mode             | 9 | -0.0088 | 0.0187 | 0.6488 | 0.0237  | 0.0190 | 0.2530 | 7.3712  | 0.4972 | 2135.4118 |
| CardioEmbolicStroke | MF0048 | MR Egger                  | 9 | 0.0485  | 0.0491 | 0.3562 | -0.0141 | 0.0125 | 0.2964 | 7.4846  | 0.4854 | 5701.1575 |
| CardioEmbolicStroke | MF0048 | Weighted median           | 9 | 0.0027  | 0.0099 | 0.7850 | -0.0141 | 0.0125 | 0.2964 | 7.4846  | 0.4854 | 5701.1575 |
| CardioEmbolicStroke | MF0048 | Inverse variance weighted | 9 | -0.0062 | 0.0075 | 0.4053 | -0.0141 | 0.0125 | 0.2964 | 7.4846  | 0.4854 | 5701.1575 |
| CardioEmbolicStroke | MF0048 | Simple mode               | 9 | 0.0051  | 0.0149 | 0.7417 | -0.0141 | 0.0125 | 0.2964 | 7.4846  | 0.4854 | 5701.1575 |
| CardioEmbolicStroke | MF0048 | Weighted mode             | 9 | 0.0051  | 0.0143 | 0.7316 | -0.0141 | 0.0125 | 0.2964 | 7.4846  | 0.4854 | 5701.1575 |
| CardioEmbolicStroke | MF0049 | MR Egger                  | 9 | 0.0244  | 0.0604 | 0.6976 | -0.0074 | 0.0154 | 0.6445 | 9.1395  | 0.2428 | 4299.9782 |
| CardioEmbolicStroke | MF0049 | Weighted median           | 9 | -0.0106 | 0.0116 | 0.3596 | -0.0074 | 0.0154 | 0.6445 | 9.1395  | 0.2428 | 4299.9782 |
| CardioEmbolicStroke | MF0049 | Inverse variance weighted | 9 | -0.0043 | 0.0088 | 0.6237 | -0.0074 | 0.0154 | 0.6445 | 9.1395  | 0.2428 | 4299.9782 |
| CardioEmbolicStroke | MF0049 | Simple mode               | 9 | -0.0242 | 0.0192 | 0.2423 | -0.0074 | 0.0154 | 0.6445 | 9.1395  | 0.2428 | 4299.9782 |
| CardioEmbolicStroke | MF0049 | Weighted mode             | 9 | -0.0207 | 0.0197 | 0.3237 | -0.0074 | 0.0154 | 0.6445 | 9.1395  | 0.2428 | 4299.9782 |
| CardioEmbolicStroke | MF0050 | MR Egger                  | 9 | 0.0952  | 0.0677 | 0.2025 | -0.0246 | 0.0173 | 0.1975 | 8.0799  | 0.4257 | 3352.6995 |
| CardioEmbolicStroke | MF0050 | Weighted median           | 9 | 0.0046  | 0.0139 | 0.7427 | -0.0246 | 0.0173 | 0.1975 | 8.0799  | 0.4257 | 3352.6995 |
| CardioEmbolicStroke | MF0050 | Inverse variance weighted | 9 | -0.0001 | 0.0104 | 0.9943 | -0.0246 | 0.0173 | 0.1975 | 8.0799  | 0.4257 | 3352.6995 |
| CardioEmbolicStroke | MF0050 | Simple mode               | 9 | -0.0060 | 0.0215 | 0.7887 | -0.0246 | 0.0173 | 0.1975 | 8.0799  | 0.4257 | 3352.6995 |
| CardioEmbolicStroke | MF0050 | Weighted mode             | 9 | 0.0002  | 0.0183 | 0.9907 | -0.0246 | 0.0173 | 0.1975 | 8.0799  | 0.4257 | 3352.6995 |
| CardioEmbolicStroke | MF0051 | MR Egger                  | 9 | -0.1509 | 0.0646 | 0.0521 | 0.0379  | 0.0165 | 0.0549 | 10.1576 | 0.2541 | 2784.5429 |

|                     |        |                           |   |         |        |        |         |        |        |         |        |           |
|---------------------|--------|---------------------------|---|---------|--------|--------|---------|--------|--------|---------|--------|-----------|
| CardioEmbolicStroke | MF0051 | Weighted median           | 9 | -0.0050 | 0.0147 | 0.7365 | 0.0379  | 0.0165 | 0.0549 | 10.1576 | 0.2541 | 2784.5429 |
| CardioEmbolicStroke | MF0051 | Inverse variance weighted | 9 | -0.0040 | 0.0111 | 0.7193 | 0.0379  | 0.0165 | 0.0549 | 10.1576 | 0.2541 | 2784.5429 |
| CardioEmbolicStroke | MF0051 | Simple mode               | 9 | 0.0148  | 0.0225 | 0.5294 | 0.0379  | 0.0165 | 0.0549 | 10.1576 | 0.2541 | 2784.5429 |
| CardioEmbolicStroke | MF0051 | Weighted mode             | 9 | -0.0047 | 0.0194 | 0.8133 | 0.0379  | 0.0165 | 0.0549 | 10.1576 | 0.2541 | 2784.5429 |
| CardioEmbolicStroke | MF0052 | MR Egger                  | 9 | -0.0020 | 0.5759 | 0.9973 | -0.0449 | 0.1469 | 0.7689 | 2.6146  | 0.9182 | 286.7143  |
| CardioEmbolicStroke | MF0052 | Weighted median           | 9 | -0.1109 | 0.1119 | 0.3216 | -0.0449 | 0.1469 | 0.7689 | 2.6146  | 0.9182 | 286.7143  |
| CardioEmbolicStroke | MF0052 | Inverse variance weighted | 9 | -0.1759 | 0.0880 | 0.0457 | -0.0449 | 0.1469 | 0.7689 | 2.6146  | 0.9182 | 286.7143  |
| CardioEmbolicStroke | MF0052 | Simple mode               | 9 | -0.0927 | 0.1687 | 0.5978 | -0.0449 | 0.1469 | 0.7689 | 2.6146  | 0.9182 | 286.7143  |
| CardioEmbolicStroke | MF0052 | Weighted mode             | 9 | -0.0794 | 0.1614 | 0.6358 | -0.0449 | 0.1469 | 0.7689 | 2.6146  | 0.9182 | 286.7143  |
| CardioEmbolicStroke | MF0054 | MR Egger                  | 9 | 0.0371  | 0.0654 | 0.5887 | -0.0088 | 0.0167 | 0.6149 | 6.5102  | 0.4816 | 4194.5709 |
| CardioEmbolicStroke | MF0054 | Weighted median           | 9 | 0.0027  | 0.0132 | 0.8367 | -0.0088 | 0.0167 | 0.6149 | 6.5102  | 0.4816 | 4194.5709 |
| CardioEmbolicStroke | MF0054 | Inverse variance weighted | 9 | 0.0030  | 0.0100 | 0.7609 | -0.0088 | 0.0167 | 0.6149 | 6.5102  | 0.4816 | 4194.5709 |
| CardioEmbolicStroke | MF0054 | Simple mode               | 9 | 0.0247  | 0.0242 | 0.3379 | -0.0088 | 0.0167 | 0.6149 | 6.5102  | 0.4816 | 4194.5709 |
| CardioEmbolicStroke | MF0054 | Weighted mode             | 9 | 0.0254  | 0.0218 | 0.2786 | -0.0088 | 0.0167 | 0.6149 | 6.5102  | 0.4816 | 4194.5709 |
| CardioEmbolicStroke | MF0055 | MR Egger                  | 9 | 0.3167  | 0.1712 | 0.1068 | -0.0849 | 0.0437 | 0.0930 | 7.6209  | 0.4714 | 1343.1997 |
| CardioEmbolicStroke | MF0055 | Weighted median           | 9 | 0.0090  | 0.0346 | 0.7951 | -0.0849 | 0.0437 | 0.0930 | 7.6209  | 0.4714 | 1343.1997 |
| CardioEmbolicStroke | MF0055 | Inverse variance weighted | 9 | -0.0122 | 0.0262 | 0.6412 | -0.0849 | 0.0437 | 0.0930 | 7.6209  | 0.4714 | 1343.1997 |
| CardioEmbolicStroke | MF0055 | Simple mode               | 9 | 0.0304  | 0.0551 | 0.5961 | -0.0849 | 0.0437 | 0.0930 | 7.6209  | 0.4714 | 1343.1997 |
| CardioEmbolicStroke | MF0055 | Weighted mode             | 9 | 0.0334  | 0.0493 | 0.5181 | -0.0849 | 0.0437 | 0.0930 | 7.6209  | 0.4714 | 1343.1997 |
| CardioEmbolicStroke | MF0056 | MR Egger                  | 9 | 0.2412  | 0.2360 | 0.3406 | -0.0549 | 0.0602 | 0.3919 | 8.3962  | 0.2990 | 517.9585  |
| CardioEmbolicStroke | MF0056 | Weighted median           | 9 | 0.0157  | 0.0437 | 0.7199 | -0.0549 | 0.0602 | 0.3919 | 8.3962  | 0.2990 | 517.9585  |
| CardioEmbolicStroke | MF0056 | Inverse variance weighted | 9 | 0.0285  | 0.0357 | 0.4250 | -0.0549 | 0.0602 | 0.3919 | 8.3962  | 0.2990 | 517.9585  |
| CardioEmbolicStroke | MF0056 | Simple mode               | 9 | 0.0218  | 0.0635 | 0.7406 | -0.0549 | 0.0602 | 0.3919 | 8.3962  | 0.2990 | 517.9585  |
| CardioEmbolicStroke | MF0056 | Weighted mode             | 9 | -0.0054 | 0.0546 | 0.9233 | -0.0549 | 0.0602 | 0.3919 | 8.3962  | 0.2990 | 517.9585  |
| CardioEmbolicStroke | MF0057 | MR Egger                  | 9 | -0.0114 | 0.2903 | 0.9699 | -0.0040 | 0.0741 | 0.9582 | 5.5208  | 0.5967 | 859.5931  |
| CardioEmbolicStroke | MF0057 | Weighted median           | 9 | -0.0516 | 0.0585 | 0.3784 | -0.0040 | 0.0741 | 0.9582 | 5.5208  | 0.5967 | 859.5931  |
| CardioEmbolicStroke | MF0057 | Inverse variance weighted | 9 | -0.0270 | 0.0444 | 0.5435 | -0.0040 | 0.0741 | 0.9582 | 5.5208  | 0.5967 | 859.5931  |
| CardioEmbolicStroke | MF0057 | Simple mode               | 9 | -0.0778 | 0.0843 | 0.3832 | -0.0040 | 0.0741 | 0.9582 | 5.5208  | 0.5967 | 859.5931  |
| CardioEmbolicStroke | MF0057 | Weighted mode             | 9 | -0.0579 | 0.0875 | 0.5267 | -0.0040 | 0.0741 | 0.9582 | 5.5208  | 0.5967 | 859.5931  |
| CardioEmbolicStroke | MF0058 | MR Egger                  | 9 | 0.2826  | 0.1747 | 0.1499 | -0.0707 | 0.0446 | 0.1570 | 9.1773  | 0.3276 | 1244.5784 |
| CardioEmbolicStroke | MF0058 | Weighted median           | 9 | -0.0018 | 0.0359 | 0.9610 | -0.0707 | 0.0446 | 0.1570 | 9.1773  | 0.3276 | 1244.5784 |
| CardioEmbolicStroke | MF0058 | Inverse variance weighted | 9 | 0.0089  | 0.0286 | 0.7562 | -0.0707 | 0.0446 | 0.1570 | 9.1773  | 0.3276 | 1244.5784 |
| CardioEmbolicStroke | MF0058 | Simple mode               | 9 | -0.0207 | 0.0595 | 0.7366 | -0.0707 | 0.0446 | 0.1570 | 9.1773  | 0.3276 | 1244.5784 |
| CardioEmbolicStroke | MF0058 | Weighted mode             | 9 | -0.0207 | 0.0581 | 0.7303 | -0.0707 | 0.0446 | 0.1570 | 9.1773  | 0.3276 | 1244.5784 |
| CardioEmbolicStroke | MF0059 | MR Egger                  | 9 | 0.0756  | 0.3857 | 0.8501 | -0.0519 | 0.0984 | 0.6144 | 6.2526  | 0.5106 | 373.4648  |
| CardioEmbolicStroke | MF0059 | Weighted median           | 9 | -0.1263 | 0.0782 | 0.1064 | -0.0519 | 0.0984 | 0.6144 | 6.2526  | 0.5106 | 373.4648  |
| CardioEmbolicStroke | MF0059 | Inverse variance weighted | 9 | -0.1253 | 0.0590 | 0.0335 | -0.0519 | 0.0984 | 0.6144 | 6.2526  | 0.5106 | 373.4648  |
| CardioEmbolicStroke | MF0059 | Simple mode               | 9 | -0.0821 | 0.1176 | 0.5050 | -0.0519 | 0.0984 | 0.6144 | 6.2526  | 0.5106 | 373.4648  |
| CardioEmbolicStroke | MF0059 | Weighted mode             | 9 | -0.1185 | 0.1092 | 0.3094 | -0.0519 | 0.0984 | 0.6144 | 6.2526  | 0.5106 | 373.4648  |
| CardioEmbolicStroke | MF0060 | MR Egger                  | 9 | 0.0148  | 0.1806 | 0.9368 | -0.0107 | 0.0461 | 0.8236 | 3.1399  | 0.8718 | 1883.7514 |
| CardioEmbolicStroke | MF0060 | Weighted median           | 9 | -0.0309 | 0.0338 | 0.3619 | -0.0107 | 0.0461 | 0.8236 | 3.1399  | 0.8718 | 1883.7514 |
| CardioEmbolicStroke | MF0060 | Inverse variance weighted | 9 | -0.0265 | 0.0276 | 0.3376 | -0.0107 | 0.0461 | 0.8236 | 3.1399  | 0.8718 | 1883.7514 |
| CardioEmbolicStroke | MF0060 | Simple mode               | 9 | -0.0227 | 0.0510 | 0.6678 | -0.0107 | 0.0461 | 0.8236 | 3.1399  | 0.8718 | 1883.7514 |
| CardioEmbolicStroke | MF0060 | Weighted mode             | 9 | -0.0275 | 0.0469 | 0.5741 | -0.0107 | 0.0461 | 0.8236 | 3.1399  | 0.8718 | 1883.7514 |
| CardioEmbolicStroke | MF0061 | MR Egger                  | 9 | 0.2878  | 0.1398 | 0.0785 | -0.0698 | 0.0357 | 0.0914 | 5.1166  | 0.7450 | 1808.0665 |
| CardioEmbolicStroke | MF0061 | Weighted median           | 9 | 0.0454  | 0.0284 | 0.1101 | -0.0698 | 0.0357 | 0.0914 | 5.1166  | 0.7450 | 1808.0665 |
| CardioEmbolicStroke | MF0061 | Inverse variance weighted | 9 | 0.0175  | 0.0214 | 0.4117 | -0.0698 | 0.0357 | 0.0914 | 5.1166  | 0.7450 | 1808.0665 |
| CardioEmbolicStroke | MF0061 | Simple mode               | 9 | 0.0508  | 0.0466 | 0.3073 | -0.0698 | 0.0357 | 0.0914 | 5.1166  | 0.7450 | 1808.0665 |
| CardioEmbolicStroke | MF0061 | Weighted mode             | 9 | 0.0508  | 0.0427 | 0.2685 | -0.0698 | 0.0357 | 0.0914 | 5.1166  | 0.7450 | 1808.0665 |
| CardioEmbolicStroke | MF0062 | MR Egger                  | 9 | 0.2771  | 0.2684 | 0.3362 | -0.0658 | 0.0685 | 0.3683 | 6.1554  | 0.5217 | 798.1300  |
| CardioEmbolicStroke | MF0062 | Weighted median           | 9 | 0.0337  | 0.0545 | 0.5363 | -0.0658 | 0.0685 | 0.3683 | 6.1554  | 0.5217 | 798.1300  |
| CardioEmbolicStroke | MF0062 | Inverse variance weighted | 9 | 0.0220  | 0.0410 | 0.5910 | -0.0658 | 0.0685 | 0.3683 | 6.1554  | 0.5217 | 798.1300  |
| CardioEmbolicStroke | MF0062 | Simple mode               | 9 | 0.0829  | 0.1001 | 0.4312 | -0.0658 | 0.0685 | 0.3683 | 6.1554  | 0.5217 | 798.1300  |
| CardioEmbolicStroke | MF0062 | Weighted mode             | 9 | 0.1031  | 0.1025 | 0.3437 | -0.0658 | 0.0685 | 0.3683 | 6.1554  | 0.5217 | 798.1300  |
| CardioEmbolicStroke | MF0063 | MR Egger                  | 9 | -0.0459 | 0.0562 | 0.4407 | 0.0118  | 0.0143 | 0.4377 | 3.3688  | 0.9091 | 7985.5279 |
| CardioEmbolicStroke | MF0063 | Weighted median           | 9 | -0.0021 | 0.0110 | 0.8511 | 0.0118  | 0.0143 | 0.4377 | 3.3688  | 0.9091 | 7985.5279 |
| CardioEmbolicStroke | MF0063 | Inverse variance weighted | 9 | -0.0002 | 0.0086 | 0.9788 | 0.0118  | 0.0143 | 0.4377 | 3.3688  | 0.9091 | 7985.5279 |
| CardioEmbolicStroke | MF0063 | Simple mode               | 9 | 0.0011  | 0.0174 | 0.9509 | 0.0118  | 0.0143 | 0.4377 | 3.3688  | 0.9091 | 7985.5279 |
| CardioEmbolicStroke | MF0063 | Weighted mode             | 9 | -0.0027 | 0.0167 | 0.8737 | 0.0118  | 0.0143 | 0.4377 | 3.3688  | 0.9091 | 7985.5279 |
| CardioEmbolicStroke | MF0064 | MR Egger                  | 9 | -0.0624 | 0.2933 | 0.8377 | -0.0096 | 0.0748 | 0.9017 | 9.1483  | 0.2422 | 371.1331  |
| CardioEmbolicStroke | MF0064 | Weighted median           | 9 | -0.0650 | 0.0570 | 0.2537 | -0.0096 | 0.0748 | 0.9017 | 9.1483  | 0.2422 | 371.1331  |

|                     |        |                           |   |         |        |        |         |        |        |         |        |           |
|---------------------|--------|---------------------------|---|---------|--------|--------|---------|--------|--------|---------|--------|-----------|
| CardioEmbolicStroke | MF0064 | Inverse variance weighted | 9 | -0.0995 | 0.0420 | 0.0178 | -0.0096 | 0.0748 | 0.9017 | 9.1483  | 0.2422 | 371.1331  |
| CardioEmbolicStroke | MF0064 | Simple mode               | 9 | -0.0301 | 0.0956 | 0.7613 | -0.0096 | 0.0748 | 0.9017 | 9.1483  | 0.2422 | 371.1331  |
| CardioEmbolicStroke | MF0064 | Weighted mode             | 9 | -0.0168 | 0.0792 | 0.8377 | -0.0096 | 0.0748 | 0.9017 | 9.1483  | 0.2422 | 371.1331  |
| CardioEmbolicStroke | MF0065 | MR Egger                  | 9 | 0.0463  | 0.0481 | 0.3675 | -0.0101 | 0.0123 | 0.4357 | 3.5827  | 0.8264 | 6031.9705 |
| CardioEmbolicStroke | MF0065 | Weighted median           | 9 | 0.0053  | 0.0097 | 0.5841 | -0.0101 | 0.0123 | 0.4357 | 3.5827  | 0.8264 | 6031.9705 |
| CardioEmbolicStroke | MF0065 | Inverse variance weighted | 9 | 0.0070  | 0.0074 | 0.3384 | -0.0101 | 0.0123 | 0.4357 | 3.5827  | 0.8264 | 6031.9705 |
| CardioEmbolicStroke | MF0065 | Simple mode               | 9 | 0.0174  | 0.0148 | 0.2742 | -0.0101 | 0.0123 | 0.4357 | 3.5827  | 0.8264 | 6031.9705 |
| CardioEmbolicStroke | MF0065 | Weighted mode             | 9 | 0.0088  | 0.0136 | 0.5344 | -0.0101 | 0.0123 | 0.4357 | 3.5827  | 0.8264 | 6031.9705 |
| CardioEmbolicStroke | MF0066 | MR Egger                  | 9 | 0.1529  | 0.2182 | 0.5062 | -0.0307 | 0.0557 | 0.5988 | 12.2909 | 0.0914 | 690.1421  |
| CardioEmbolicStroke | MF0066 | Weighted median           | 9 | 0.0295  | 0.0354 | 0.4050 | -0.0307 | 0.0557 | 0.5988 | 12.2909 | 0.0914 | 690.1421  |
| CardioEmbolicStroke | MF0066 | Inverse variance weighted | 9 | 0.0341  | 0.0319 | 0.2854 | -0.0307 | 0.0557 | 0.5988 | 12.2909 | 0.0914 | 690.1421  |
| CardioEmbolicStroke | MF0066 | Simple mode               | 9 | 0.0597  | 0.0652 | 0.3864 | -0.0307 | 0.0557 | 0.5988 | 12.2909 | 0.0914 | 690.1421  |
| CardioEmbolicStroke | MF0066 | Weighted mode             | 9 | 0.0435  | 0.0625 | 0.5059 | -0.0307 | 0.0557 | 0.5988 | 12.2909 | 0.0914 | 690.1421  |
| CardioEmbolicStroke | MF0067 | MR Egger                  | 9 | -0.0015 | 0.0446 | 0.9737 | -0.0013 | 0.0114 | 0.9093 | 2.2245  | 0.9464 | 9492.4328 |
| CardioEmbolicStroke | MF0067 | Weighted median           | 9 | -0.0056 | 0.0085 | 0.5142 | -0.0013 | 0.0114 | 0.9093 | 2.2245  | 0.9464 | 9492.4328 |
| CardioEmbolicStroke | MF0067 | Inverse variance weighted | 9 | -0.0067 | 0.0068 | 0.3235 | -0.0013 | 0.0114 | 0.9093 | 2.2245  | 0.9464 | 9492.4328 |
| CardioEmbolicStroke | MF0067 | Simple mode               | 9 | -0.0041 | 0.0127 | 0.7529 | -0.0013 | 0.0114 | 0.9093 | 2.2245  | 0.9464 | 9492.4328 |
| CardioEmbolicStroke | MF0067 | Weighted mode             | 9 | -0.0022 | 0.0129 | 0.8701 | -0.0013 | 0.0114 | 0.9093 | 2.2245  | 0.9464 | 9492.4328 |
| CardioEmbolicStroke | MF0068 | MR Egger                  | 9 | 0.0199  | 0.0407 | 0.6393 | -0.0047 | 0.0104 | 0.6618 | 3.7248  | 0.8109 | 9287.1876 |
| CardioEmbolicStroke | MF0068 | Weighted median           | 9 | 0.0021  | 0.0077 | 0.7857 | -0.0047 | 0.0104 | 0.6618 | 3.7248  | 0.8109 | 9287.1876 |
| CardioEmbolicStroke | MF0068 | Inverse variance weighted | 9 | 0.0016  | 0.0062 | 0.8013 | -0.0047 | 0.0104 | 0.6618 | 3.7248  | 0.8109 | 9287.1876 |
| CardioEmbolicStroke | MF0068 | Simple mode               | 9 | -0.0089 | 0.0133 | 0.5238 | -0.0047 | 0.0104 | 0.6618 | 3.7248  | 0.8109 | 9287.1876 |
| CardioEmbolicStroke | MF0068 | Weighted mode             | 9 | -0.0059 | 0.0127 | 0.6566 | -0.0047 | 0.0104 | 0.6618 | 3.7248  | 0.8109 | 9287.1876 |
| CardioEmbolicStroke | MF0069 | MR Egger                  | 9 | -0.1309 | 0.2224 | 0.5747 | 0.0229  | 0.0567 | 0.6980 | 1.8914  | 0.9656 | 1364.3728 |
| CardioEmbolicStroke | MF0069 | Weighted median           | 9 | -0.0408 | 0.0419 | 0.3301 | 0.0229  | 0.0567 | 0.6980 | 1.8914  | 0.9656 | 1364.3728 |
| CardioEmbolicStroke | MF0069 | Inverse variance weighted | 9 | -0.0420 | 0.0340 | 0.2166 | 0.0229  | 0.0567 | 0.6980 | 1.8914  | 0.9656 | 1364.3728 |
| CardioEmbolicStroke | MF0069 | Simple mode               | 9 | -0.0669 | 0.0609 | 0.3040 | 0.0229  | 0.0567 | 0.6980 | 1.8914  | 0.9656 | 1364.3728 |
| CardioEmbolicStroke | MF0069 | Weighted mode             | 9 | -0.0483 | 0.0582 | 0.4312 | 0.0229  | 0.0567 | 0.6980 | 1.8914  | 0.9656 | 1364.3728 |
| CardioEmbolicStroke | MF0070 | MR Egger                  | 9 | 0.2417  | 0.2663 | 0.3942 | -0.0576 | 0.0679 | 0.4245 | 6.5171  | 0.4808 | 517.4665  |
| CardioEmbolicStroke | MF0070 | Weighted median           | 9 | 0.0012  | 0.0513 | 0.9821 | -0.0576 | 0.0679 | 0.4245 | 6.5171  | 0.4808 | 517.4665  |
| CardioEmbolicStroke | MF0070 | Inverse variance weighted | 9 | 0.0185  | 0.0407 | 0.6486 | -0.0576 | 0.0679 | 0.4245 | 6.5171  | 0.4808 | 517.4665  |
| CardioEmbolicStroke | MF0070 | Simple mode               | 9 | 0.0325  | 0.0789 | 0.6913 | -0.0576 | 0.0679 | 0.4245 | 6.5171  | 0.4808 | 517.4665  |
| CardioEmbolicStroke | MF0070 | Weighted mode             | 9 | -0.0001 | 0.0704 | 0.9990 | -0.0576 | 0.0679 | 0.4245 | 6.5171  | 0.4808 | 517.4665  |
| CardioEmbolicStroke | MF0071 | MR Egger                  | 9 | 0.0104  | 0.0353 | 0.7769 | -0.0039 | 0.0090 | 0.6754 | 7.5990  | 0.3693 | 6832.6842 |
| CardioEmbolicStroke | MF0071 | Weighted median           | 9 | -0.0064 | 0.0073 | 0.3784 | -0.0039 | 0.0090 | 0.6754 | 7.5990  | 0.3693 | 6832.6842 |
| CardioEmbolicStroke | MF0071 | Inverse variance weighted | 9 | -0.0048 | 0.0052 | 0.3501 | -0.0039 | 0.0090 | 0.6754 | 7.5990  | 0.3693 | 6832.6842 |
| CardioEmbolicStroke | MF0071 | Simple mode               | 9 | -0.0171 | 0.0125 | 0.2065 | -0.0039 | 0.0090 | 0.6754 | 7.5990  | 0.3693 | 6832.6842 |
| CardioEmbolicStroke | MF0071 | Weighted mode             | 9 | -0.0141 | 0.0120 | 0.2758 | -0.0039 | 0.0090 | 0.6754 | 7.5990  | 0.3693 | 6832.6842 |
| CardioEmbolicStroke | MF0072 | MR Egger                  | 9 | 0.0535  | 0.2559 | 0.8402 | -0.0319 | 0.0653 | 0.6397 | 5.9559  | 0.5449 | 687.0331  |
| CardioEmbolicStroke | MF0072 | Weighted median           | 9 | -0.0693 | 0.0531 | 0.1918 | -0.0319 | 0.0653 | 0.6397 | 5.9559  | 0.5449 | 687.0331  |
| CardioEmbolicStroke | MF0072 | Inverse variance weighted | 9 | -0.0702 | 0.0391 | 0.0728 | -0.0319 | 0.0653 | 0.6397 | 5.9559  | 0.5449 | 687.0331  |
| CardioEmbolicStroke | MF0072 | Simple mode               | 9 | -0.0952 | 0.0789 | 0.2622 | -0.0319 | 0.0653 | 0.6397 | 5.9559  | 0.5449 | 687.0331  |
| CardioEmbolicStroke | MF0072 | Weighted mode             | 9 | -0.0701 | 0.0711 | 0.3532 | -0.0319 | 0.0653 | 0.6397 | 5.9559  | 0.5449 | 687.0331  |
| CardioEmbolicStroke | MF0073 | MR Egger                  | 9 | 0.0221  | 0.0613 | 0.7286 | -0.0068 | 0.0156 | 0.6756 | 9.6493  | 0.2093 | 4787.1563 |
| CardioEmbolicStroke | MF0073 | Weighted median           | 9 | -0.0059 | 0.0106 | 0.5791 | -0.0068 | 0.0156 | 0.6756 | 9.6493  | 0.2093 | 4787.1563 |
| CardioEmbolicStroke | MF0073 | Inverse variance weighted | 9 | -0.0043 | 0.0089 | 0.6278 | -0.0068 | 0.0156 | 0.6756 | 9.6493  | 0.2093 | 4787.1563 |
| CardioEmbolicStroke | MF0073 | Simple mode               | 9 | -0.0067 | 0.0144 | 0.6560 | -0.0068 | 0.0156 | 0.6756 | 9.6493  | 0.2093 | 4787.1563 |
| CardioEmbolicStroke | MF0073 | Weighted mode             | 9 | -0.0064 | 0.0133 | 0.6419 | -0.0068 | 0.0156 | 0.6756 | 9.6493  | 0.2093 | 4787.1563 |
| CardioEmbolicStroke | MF0074 | MR Egger                  | 9 | 0.0484  | 0.0534 | 0.3953 | -0.0131 | 0.0136 | 0.3673 | 5.9127  | 0.5500 | 5408.5060 |
| CardioEmbolicStroke | MF0074 | Weighted median           | 9 | 0.0034  | 0.0109 | 0.7582 | -0.0131 | 0.0136 | 0.3673 | 5.9127  | 0.5500 | 5408.5060 |
| CardioEmbolicStroke | MF0074 | Inverse variance weighted | 9 | -0.0025 | 0.0082 | 0.7593 | -0.0131 | 0.0136 | 0.3673 | 5.9127  | 0.5500 | 5408.5060 |
| CardioEmbolicStroke | MF0074 | Simple mode               | 9 | 0.0055  | 0.0186 | 0.7767 | -0.0131 | 0.0136 | 0.3673 | 5.9127  | 0.5500 | 5408.5060 |
| CardioEmbolicStroke | MF0074 | Weighted mode             | 9 | 0.0049  | 0.0177 | 0.7901 | -0.0131 | 0.0136 | 0.3673 | 5.9127  | 0.5500 | 5408.5060 |
| CardioEmbolicStroke | MF0075 | MR Egger                  | 9 | -0.1411 | 0.0819 | 0.1285 | 0.0347  | 0.0209 | 0.1408 | 10.1131 | 0.2572 | 2261.9773 |
| CardioEmbolicStroke | MF0075 | Weighted median           | 9 | -0.0077 | 0.0171 | 0.6539 | 0.0347  | 0.0209 | 0.1408 | 10.1131 | 0.2572 | 2261.9773 |
| CardioEmbolicStroke | MF0075 | Inverse variance weighted | 9 | -0.0068 | 0.0138 | 0.6251 | 0.0347  | 0.0209 | 0.1408 | 10.1131 | 0.2572 | 2261.9773 |
| CardioEmbolicStroke | MF0075 | Simple mode               | 9 | -0.0268 | 0.0293 | 0.3871 | 0.0347  | 0.0209 | 0.1408 | 10.1131 | 0.2572 | 2261.9773 |
| CardioEmbolicStroke | MF0075 | Weighted mode             | 9 | -0.0121 | 0.0235 | 0.6192 | 0.0347  | 0.0209 | 0.1408 | 10.1131 | 0.2572 | 2261.9773 |
| CardioEmbolicStroke | MF0076 | MR Egger                  | 9 | -0.0849 | 0.2281 | 0.7206 | 0.0187  | 0.0582 | 0.7572 | 5.1190  | 0.6454 | 1071.6900 |
| CardioEmbolicStroke | MF0076 | Weighted median           | 9 | -0.0168 | 0.0452 | 0.7105 | 0.0187  | 0.0582 | 0.7572 | 5.1190  | 0.6454 | 1071.6900 |
| CardioEmbolicStroke | MF0076 | Inverse variance weighted | 9 | -0.0125 | 0.0349 | 0.7206 | 0.0187  | 0.0582 | 0.7572 | 5.1190  | 0.6454 | 1071.6900 |

|                     |        |                           |   |         |        |        |         |        |        |         |        |            |
|---------------------|--------|---------------------------|---|---------|--------|--------|---------|--------|--------|---------|--------|------------|
| CardioEmbolicStroke | MF0076 | Simple mode               | 9 | -0.0291 | 0.0751 | 0.7089 | 0.0187  | 0.0582 | 0.7572 | 5.1190  | 0.6454 | 1071.6900  |
| CardioEmbolicStroke | MF0076 | Weighted mode             | 9 | -0.0211 | 0.0664 | 0.7591 | 0.0187  | 0.0582 | 0.7572 | 5.1190  | 0.6454 | 1071.6900  |
| CardioEmbolicStroke | MF0077 | MR Egger                  | 9 | 0.0115  | 0.1600 | 0.9446 | -0.0116 | 0.0408 | 0.7837 | 2.5064  | 0.9266 | 1724.1217  |
| CardioEmbolicStroke | MF0077 | Weighted median           | 9 | -0.0310 | 0.0305 | 0.3092 | -0.0116 | 0.0408 | 0.7837 | 2.5064  | 0.9266 | 1724.1217  |
| CardioEmbolicStroke | MF0077 | Inverse variance weighted | 9 | -0.0336 | 0.0245 | 0.1697 | -0.0116 | 0.0408 | 0.7837 | 2.5064  | 0.9266 | 1724.1217  |
| CardioEmbolicStroke | MF0077 | Simple mode               | 9 | -0.0706 | 0.0495 | 0.1919 | -0.0116 | 0.0408 | 0.7837 | 2.5064  | 0.9266 | 1724.1217  |
| CardioEmbolicStroke | MF0077 | Weighted mode             | 9 | 0.0013  | 0.0475 | 0.9789 | -0.0116 | 0.0408 | 0.7837 | 2.5064  | 0.9266 | 1724.1217  |
| CardioEmbolicStroke | MF0078 | MR Egger                  | 9 | 0.0735  | 0.1328 | 0.5974 | -0.0115 | 0.0339 | 0.7453 | 6.8424  | 0.4455 | 1190.0643  |
| CardioEmbolicStroke | MF0078 | Weighted median           | 9 | 0.0131  | 0.0278 | 0.6369 | -0.0115 | 0.0339 | 0.7453 | 6.8424  | 0.4455 | 1190.0643  |
| CardioEmbolicStroke | MF0078 | Inverse variance weighted | 9 | 0.0291  | 0.0203 | 0.1516 | -0.0115 | 0.0339 | 0.7453 | 6.8424  | 0.4455 | 1190.0643  |
| CardioEmbolicStroke | MF0078 | Simple mode               | 9 | 0.0010  | 0.0398 | 0.9799 | -0.0115 | 0.0339 | 0.7453 | 6.8424  | 0.4455 | 1190.0643  |
| CardioEmbolicStroke | MF0078 | Weighted mode             | 9 | -0.0032 | 0.0338 | 0.9262 | -0.0115 | 0.0339 | 0.7453 | 6.8424  | 0.4455 | 1190.0643  |
| CardioEmbolicStroke | MF0079 | MR Egger                  | 9 | 0.3280  | 0.2935 | 0.3006 | -0.0776 | 0.0749 | 0.3347 | 10.8767 | 0.2088 | 407.3439   |
| CardioEmbolicStroke | MF0079 | Weighted median           | 9 | -0.0027 | 0.0527 | 0.9597 | -0.0776 | 0.0749 | 0.3347 | 10.8767 | 0.2088 | 407.3439   |
| CardioEmbolicStroke | MF0079 | Inverse variance weighted | 9 | 0.0276  | 0.0451 | 0.5404 | -0.0776 | 0.0749 | 0.3347 | 10.8767 | 0.2088 | 407.3439   |
| CardioEmbolicStroke | MF0079 | Simple mode               | 9 | -0.0037 | 0.0798 | 0.9642 | -0.0776 | 0.0749 | 0.3347 | 10.8767 | 0.2088 | 407.3439   |
| CardioEmbolicStroke | MF0079 | Weighted mode             | 9 | -0.0115 | 0.0734 | 0.8797 | -0.0776 | 0.0749 | 0.3347 | 10.8767 | 0.2088 | 407.3439   |
| CardioEmbolicStroke | MF0080 | MR Egger                  | 9 | -0.0443 | 0.2270 | 0.8509 | 0.0080  | 0.0579 | 0.8945 | 9.9198  | 0.1932 | 1017.0712  |
| CardioEmbolicStroke | MF0080 | Weighted median           | 9 | -0.0213 | 0.0422 | 0.6135 | 0.0080  | 0.0579 | 0.8945 | 9.9198  | 0.1932 | 1017.0712  |
| CardioEmbolicStroke | MF0080 | Inverse variance weighted | 9 | -0.0134 | 0.0325 | 0.6793 | 0.0080  | 0.0579 | 0.8945 | 9.9198  | 0.1932 | 1017.0712  |
| CardioEmbolicStroke | MF0080 | Simple mode               | 9 | -0.0250 | 0.0681 | 0.7232 | 0.0080  | 0.0579 | 0.8945 | 9.9198  | 0.1932 | 1017.0712  |
| CardioEmbolicStroke | MF0080 | Weighted mode             | 9 | -0.0275 | 0.0669 | 0.6919 | 0.0080  | 0.0579 | 0.8945 | 9.9198  | 0.1932 | 1017.0712  |
| CardioEmbolicStroke | MF0081 | MR Egger                  | 9 | 0.1477  | 0.4221 | 0.7367 | -0.0068 | 0.1077 | 0.9517 | 2.5567  | 0.9228 | 475.5591   |
| CardioEmbolicStroke | MF0081 | Weighted median           | 9 | 0.1313  | 0.0827 | 0.1124 | -0.0068 | 0.1077 | 0.9517 | 2.5567  | 0.9228 | 475.5591   |
| CardioEmbolicStroke | MF0081 | Inverse variance weighted | 9 | 0.1215  | 0.0645 | 0.0596 | -0.0068 | 0.1077 | 0.9517 | 2.5567  | 0.9228 | 475.5591   |
| CardioEmbolicStroke | MF0081 | Simple mode               | 9 | 0.1290  | 0.1349 | 0.3669 | -0.0068 | 0.1077 | 0.9517 | 2.5567  | 0.9228 | 475.5591   |
| CardioEmbolicStroke | MF0081 | Weighted mode             | 9 | 0.1734  | 0.1261 | 0.2062 | -0.0068 | 0.1077 | 0.9517 | 2.5567  | 0.9228 | 475.5591   |
| CardioEmbolicStroke | MF0082 | MR Egger                  | 9 | -0.1112 | 0.3598 | 0.7662 | 0.0192  | 0.0918 | 0.8401 | 8.5808  | 0.2842 | 499.7768   |
| CardioEmbolicStroke | MF0082 | Weighted median           | 9 | -0.0400 | 0.0659 | 0.5433 | 0.0192  | 0.0918 | 0.8401 | 8.5808  | 0.2842 | 499.7768   |
| CardioEmbolicStroke | MF0082 | Inverse variance weighted | 9 | -0.0368 | 0.0516 | 0.4754 | 0.0192  | 0.0918 | 0.8401 | 8.5808  | 0.2842 | 499.7768   |
| CardioEmbolicStroke | MF0082 | Simple mode               | 9 | -0.0831 | 0.1026 | 0.4415 | 0.0192  | 0.0918 | 0.8401 | 8.5808  | 0.2842 | 499.7768   |
| CardioEmbolicStroke | MF0082 | Weighted mode             | 9 | -0.0751 | 0.0958 | 0.4553 | 0.0192  | 0.0918 | 0.8401 | 8.5808  | 0.2842 | 499.7768   |
| CardioEmbolicStroke | MF0083 | MR Egger                  | 9 | -0.0367 | 0.3338 | 0.9156 | 0.0134  | 0.0852 | 0.8795 | 5.3897  | 0.6125 | 603.5989   |
| CardioEmbolicStroke | MF0083 | Weighted median           | 9 | 0.0135  | 0.0676 | 0.8421 | 0.0134  | 0.0852 | 0.8795 | 5.3897  | 0.6125 | 603.5989   |
| CardioEmbolicStroke | MF0083 | Inverse variance weighted | 9 | 0.0152  | 0.0510 | 0.7661 | 0.0134  | 0.0852 | 0.8795 | 5.3897  | 0.6125 | 603.5989   |
| CardioEmbolicStroke | MF0083 | Simple mode               | 9 | -0.0313 | 0.1122 | 0.7874 | 0.0134  | 0.0852 | 0.8795 | 5.3897  | 0.6125 | 603.5989   |
| CardioEmbolicStroke | MF0083 | Weighted mode             | 9 | 0.0677  | 0.1014 | 0.5229 | 0.0134  | 0.0852 | 0.8795 | 5.3897  | 0.6125 | 603.5989   |
| CardioEmbolicStroke | MF0084 | MR Egger                  | 9 | 0.7164  | 0.6360 | 0.2971 | -0.1989 | 0.1623 | 0.2600 | 7.1666  | 0.5188 | 159.9321   |
| CardioEmbolicStroke | MF0084 | Weighted median           | 9 | -0.0482 | 0.1234 | 0.6965 | -0.1989 | 0.1623 | 0.2600 | 7.1666  | 0.5188 | 159.9321   |
| CardioEmbolicStroke | MF0084 | Inverse variance weighted | 9 | -0.0540 | 0.0972 | 0.5787 | -0.1989 | 0.1623 | 0.2600 | 7.1666  | 0.5188 | 159.9321   |
| CardioEmbolicStroke | MF0084 | Simple mode               | 9 | -0.0625 | 0.1866 | 0.7464 | -0.1989 | 0.1623 | 0.2600 | 7.1666  | 0.5188 | 159.9321   |
| CardioEmbolicStroke | MF0084 | Weighted mode             | 9 | -0.0996 | 0.1777 | 0.5904 | -0.1989 | 0.1623 | 0.2600 | 7.1666  | 0.5188 | 159.9321   |
| CardioEmbolicStroke | MF0085 | MR Egger                  | 9 | -0.0019 | 0.2620 | 0.9944 | -0.0125 | 0.0668 | 0.8573 | 2.5748  | 0.9214 | 1168.0483  |
| CardioEmbolicStroke | MF0085 | Weighted median           | 9 | -0.0516 | 0.0504 | 0.3052 | -0.0125 | 0.0668 | 0.8573 | 2.5748  | 0.9214 | 1168.0483  |
| CardioEmbolicStroke | MF0085 | Inverse variance weighted | 9 | -0.0502 | 0.0400 | 0.2097 | -0.0125 | 0.0668 | 0.8573 | 2.5748  | 0.9214 | 1168.0483  |
| CardioEmbolicStroke | MF0085 | Simple mode               | 9 | -0.0582 | 0.0757 | 0.4642 | -0.0125 | 0.0668 | 0.8573 | 2.5748  | 0.9214 | 1168.0483  |
| CardioEmbolicStroke | MF0085 | Weighted mode             | 9 | -0.0556 | 0.0776 | 0.4942 | -0.0125 | 0.0668 | 0.8573 | 2.5748  | 0.9214 | 1168.0483  |
| CardioEmbolicStroke | MF0086 | MR Egger                  | 9 | 0.0226  | 0.0406 | 0.5956 | -0.0052 | 0.0104 | 0.6280 | 1.8998  | 0.9652 | 10735.4581 |
| CardioEmbolicStroke | MF0086 | Weighted median           | 9 | 0.0015  | 0.0079 | 0.8454 | -0.0052 | 0.0104 | 0.6280 | 1.8998  | 0.9652 | 10735.4581 |
| CardioEmbolicStroke | MF0086 | Inverse variance weighted | 9 | 0.0022  | 0.0062 | 0.7179 | -0.0052 | 0.0104 | 0.6280 | 1.8998  | 0.9652 | 10735.4581 |
| CardioEmbolicStroke | MF0086 | Simple mode               | 9 | 0.0015  | 0.0114 | 0.8967 | -0.0052 | 0.0104 | 0.6280 | 1.8998  | 0.9652 | 10735.4581 |
| CardioEmbolicStroke | MF0086 | Weighted mode             | 9 | 0.0012  | 0.0100 | 0.9050 | -0.0052 | 0.0104 | 0.6280 | 1.8998  | 0.9652 | 10735.4581 |
| CardioEmbolicStroke | MF0087 | MR Egger                  | 9 | 0.2812  | 0.2132 | 0.2287 | -0.0700 | 0.0544 | 0.2389 | 16.2521 | 0.0389 | 996.9767   |
| CardioEmbolicStroke | MF0087 | Weighted median           | 9 | 0.0214  | 0.0342 | 0.5316 | -0.0700 | 0.0544 | 0.2389 | 16.2521 | 0.0389 | 996.9767   |
| CardioEmbolicStroke | MF0087 | Inverse variance weighted | 9 | 0.0099  | 0.0339 | 0.7699 | -0.0700 | 0.0544 | 0.2389 | 16.2521 | 0.0389 | 996.9767   |
| CardioEmbolicStroke | MF0087 | Simple mode               | 9 | 0.0060  | 0.0611 | 0.9244 | -0.0700 | 0.0544 | 0.2389 | 16.2521 | 0.0389 | 996.9767   |
| CardioEmbolicStroke | MF0087 | Weighted mode             | 9 | 0.0300  | 0.0468 | 0.5395 | -0.0700 | 0.0544 | 0.2389 | 16.2521 | 0.0389 | 996.9767   |
| CardioEmbolicStroke | MF0088 | MR Egger                  | 9 | 0.0971  | 0.1284 | 0.4742 | -0.0191 | 0.0328 | 0.5774 | 4.1776  | 0.7591 | 1462.1694  |
| CardioEmbolicStroke | MF0088 | Weighted median           | 9 | 0.0202  | 0.0243 | 0.4062 | -0.0191 | 0.0328 | 0.5774 | 4.1776  | 0.7591 | 1462.1694  |
| CardioEmbolicStroke | MF0088 | Inverse variance weighted | 9 | 0.0229  | 0.0196 | 0.2424 | -0.0191 | 0.0328 | 0.5774 | 4.1776  | 0.7591 | 1462.1694  |
| CardioEmbolicStroke | MF0088 | Simple mode               | 9 | 0.0272  | 0.0360 | 0.4725 | -0.0191 | 0.0328 | 0.5774 | 4.1776  | 0.7591 | 1462.1694  |

|                     |        |                           |   |         |        |        |         |        |        |         |        |           |
|---------------------|--------|---------------------------|---|---------|--------|--------|---------|--------|--------|---------|--------|-----------|
| CardioEmbolicStroke | MF0088 | Weighted mode             | 9 | 0.0262  | 0.0331 | 0.4513 | -0.0191 | 0.0328 | 0.5774 | 4.1776  | 0.7591 | 1462.1694 |
| CardioEmbolicStroke | MF0089 | MR Egger                  | 9 | 0.2163  | 0.2238 | 0.3659 | -0.0537 | 0.0571 | 0.3784 | 12.7671 | 0.1201 | 972.5998  |
| CardioEmbolicStroke | MF0089 | Weighted median           | 9 | 0.0104  | 0.0381 | 0.7844 | -0.0537 | 0.0571 | 0.3784 | 12.7671 | 0.1201 | 972.5998  |
| CardioEmbolicStroke | MF0089 | Inverse variance weighted | 9 | 0.0084  | 0.0339 | 0.8044 | -0.0537 | 0.0571 | 0.3784 | 12.7671 | 0.1201 | 972.5998  |
| CardioEmbolicStroke | MF0089 | Simple mode               | 9 | 0.0046  | 0.0563 | 0.9368 | -0.0537 | 0.0571 | 0.3784 | 12.7671 | 0.1201 | 972.5998  |
| CardioEmbolicStroke | MF0089 | Weighted mode             | 9 | 0.0076  | 0.0493 | 0.8819 | -0.0537 | 0.0571 | 0.3784 | 12.7671 | 0.1201 | 972.5998  |
| CardioEmbolicStroke | MF0090 | MR Egger                  | 9 | 0.0593  | 0.1668 | 0.7327 | -0.0190 | 0.0426 | 0.6695 | 8.8557  | 0.2632 | 1509.1515 |
| CardioEmbolicStroke | MF0090 | Weighted median           | 9 | -0.0181 | 0.0326 | 0.5783 | -0.0190 | 0.0426 | 0.6695 | 8.8557  | 0.2632 | 1509.1515 |
| CardioEmbolicStroke | MF0090 | Inverse variance weighted | 9 | -0.0141 | 0.0242 | 0.5592 | -0.0190 | 0.0426 | 0.6695 | 8.8557  | 0.2632 | 1509.1515 |
| CardioEmbolicStroke | MF0090 | Simple mode               | 9 | -0.0097 | 0.0473 | 0.8422 | -0.0190 | 0.0426 | 0.6695 | 8.8557  | 0.2632 | 1509.1515 |
| CardioEmbolicStroke | MF0090 | Weighted mode             | 9 | -0.0137 | 0.0485 | 0.7851 | -0.0190 | 0.0426 | 0.6695 | 8.8557  | 0.2632 | 1509.1515 |
| CardioEmbolicStroke | MF0091 | MR Egger                  | 9 | 0.0587  | 0.1673 | 0.7359 | -0.0187 | 0.0427 | 0.6739 | 8.8880  | 0.2608 | 1503.9063 |
| CardioEmbolicStroke | MF0091 | Weighted median           | 9 | -0.0193 | 0.0302 | 0.5226 | -0.0187 | 0.0427 | 0.6739 | 8.8880  | 0.2608 | 1503.9063 |
| CardioEmbolicStroke | MF0091 | Inverse variance weighted | 9 | -0.0139 | 0.0242 | 0.5675 | -0.0187 | 0.0427 | 0.6739 | 8.8880  | 0.2608 | 1503.9063 |
| CardioEmbolicStroke | MF0091 | Simple mode               | 9 | -0.0094 | 0.0504 | 0.8560 | -0.0187 | 0.0427 | 0.6739 | 8.8880  | 0.2608 | 1503.9063 |
| CardioEmbolicStroke | MF0091 | Weighted mode             | 9 | -0.0134 | 0.0472 | 0.7835 | -0.0187 | 0.0427 | 0.6739 | 8.8880  | 0.2608 | 1503.9063 |
| CardioEmbolicStroke | MF0092 | MR Egger                  | 9 | 0.1611  | 0.1631 | 0.3561 | -0.0328 | 0.0416 | 0.4560 | 2.7287  | 0.9089 | 1284.6846 |
| CardioEmbolicStroke | MF0092 | Weighted median           | 9 | 0.0291  | 0.0320 | 0.3634 | -0.0328 | 0.0416 | 0.4560 | 2.7287  | 0.9089 | 1284.6846 |
| CardioEmbolicStroke | MF0092 | Inverse variance weighted | 9 | 0.0339  | 0.0249 | 0.1734 | -0.0328 | 0.0416 | 0.4560 | 2.7287  | 0.9089 | 1284.6846 |
| CardioEmbolicStroke | MF0092 | Simple mode               | 9 | 0.0361  | 0.0500 | 0.4910 | -0.0328 | 0.0416 | 0.4560 | 2.7287  | 0.9089 | 1284.6846 |
| CardioEmbolicStroke | MF0092 | Weighted mode             | 9 | 0.0242  | 0.0465 | 0.6173 | -0.0328 | 0.0416 | 0.4560 | 2.7287  | 0.9089 | 1284.6846 |
| CardioEmbolicStroke | MF0093 | MR Egger                  | 9 | 0.1919  | 0.5102 | 0.7179 | -0.0769 | 0.1301 | 0.5730 | 2.9994  | 0.8851 | 417.6075  |
| CardioEmbolicStroke | MF0093 | Weighted median           | 9 | -0.0780 | 0.0982 | 0.4269 | -0.0769 | 0.1301 | 0.5730 | 2.9994  | 0.8851 | 417.6075  |
| CardioEmbolicStroke | MF0093 | Inverse variance weighted | 9 | -0.1061 | 0.0780 | 0.1734 | -0.0769 | 0.1301 | 0.5730 | 2.9994  | 0.8851 | 417.6075  |
| CardioEmbolicStroke | MF0093 | Simple mode               | 9 | -0.0149 | 0.1539 | 0.9252 | -0.0769 | 0.1301 | 0.5730 | 2.9994  | 0.8851 | 417.6075  |
| CardioEmbolicStroke | MF0093 | Weighted mode             | 9 | -0.0112 | 0.1473 | 0.9415 | -0.0769 | 0.1301 | 0.5730 | 2.9994  | 0.8851 | 417.6075  |
| CardioEmbolicStroke | MF0094 | MR Egger                  | 9 | -0.0695 | 0.2446 | 0.7846 | 0.0141  | 0.0624 | 0.8273 | 9.6194  | 0.2112 | 933.1795  |
| CardioEmbolicStroke | MF0094 | Weighted median           | 9 | 0.0017  | 0.0445 | 0.9699 | 0.0141  | 0.0624 | 0.8273 | 9.6194  | 0.2112 | 933.1795  |
| CardioEmbolicStroke | MF0094 | Inverse variance weighted | 9 | -0.0147 | 0.0351 | 0.6747 | 0.0141  | 0.0624 | 0.8273 | 9.6194  | 0.2112 | 933.1795  |
| CardioEmbolicStroke | MF0094 | Simple mode               | 9 | 0.0208  | 0.0763 | 0.7924 | 0.0141  | 0.0624 | 0.8273 | 9.6194  | 0.2112 | 933.1795  |
| CardioEmbolicStroke | MF0094 | Weighted mode             | 9 | 0.0179  | 0.0740 | 0.8147 | 0.0141  | 0.0624 | 0.8273 | 9.6194  | 0.2112 | 933.1795  |
| CardioEmbolicStroke | MF0095 | MR Egger                  | 9 | 0.1673  | 0.3505 | 0.6476 | -0.0352 | 0.0894 | 0.7058 | 14.6534 | 0.0407 | 456.8505  |
| CardioEmbolicStroke | MF0095 | Weighted median           | 9 | 0.0407  | 0.0522 | 0.4359 | -0.0352 | 0.0894 | 0.7058 | 14.6534 | 0.0407 | 456.8505  |
| CardioEmbolicStroke | MF0095 | Inverse variance weighted | 9 | 0.0311  | 0.0507 | 0.5393 | -0.0352 | 0.0894 | 0.7058 | 14.6534 | 0.0407 | 456.8505  |
| CardioEmbolicStroke | MF0095 | Simple mode               | 9 | 0.0739  | 0.0803 | 0.3843 | -0.0352 | 0.0894 | 0.7058 | 14.6534 | 0.0407 | 456.8505  |
| CardioEmbolicStroke | MF0095 | Weighted mode             | 9 | 0.0289  | 0.0759 | 0.7131 | -0.0352 | 0.0894 | 0.7058 | 14.6534 | 0.0407 | 456.8505  |
| CardioEmbolicStroke | MF0096 | MR Egger                  | 9 | -0.1211 | 0.0700 | 0.1272 | 0.0271  | 0.0179 | 0.1733 | 4.8378  | 0.7748 | 3380.9021 |
| CardioEmbolicStroke | MF0096 | Weighted median           | 9 | -0.0232 | 0.0139 | 0.0957 | 0.0271  | 0.0179 | 0.1733 | 4.8378  | 0.7748 | 3380.9021 |
| CardioEmbolicStroke | MF0096 | Inverse variance weighted | 9 | -0.0162 | 0.0107 | 0.1294 | 0.0271  | 0.0179 | 0.1733 | 4.8378  | 0.7748 | 3380.9021 |
| CardioEmbolicStroke | MF0096 | Simple mode               | 9 | -0.0235 | 0.0207 | 0.2894 | 0.0271  | 0.0179 | 0.1733 | 4.8378  | 0.7748 | 3380.9021 |
| CardioEmbolicStroke | MF0096 | Weighted mode             | 9 | -0.0238 | 0.0196 | 0.2598 | 0.0271  | 0.0179 | 0.1733 | 4.8378  | 0.7748 | 3380.9021 |
| CardioEmbolicStroke | MF0097 | MR Egger                  | 9 | 0.3940  | 0.1994 | 0.0887 | -0.0936 | 0.0509 | 0.1084 | 7.2227  | 0.5128 | 854.9192  |
| CardioEmbolicStroke | MF0097 | Weighted median           | 9 | 0.0221  | 0.0413 | 0.5935 | -0.0936 | 0.0509 | 0.1084 | 7.2227  | 0.5128 | 854.9192  |
| CardioEmbolicStroke | MF0097 | Inverse variance weighted | 9 | 0.0316  | 0.0305 | 0.3004 | -0.0936 | 0.0509 | 0.1084 | 7.2227  | 0.5128 | 854.9192  |
| CardioEmbolicStroke | MF0097 | Simple mode               | 9 | -0.0244 | 0.0716 | 0.7425 | -0.0936 | 0.0509 | 0.1084 | 7.2227  | 0.5128 | 854.9192  |
| CardioEmbolicStroke | MF0097 | Weighted mode             | 9 | -0.0084 | 0.0702 | 0.9076 | -0.0936 | 0.0509 | 0.1084 | 7.2227  | 0.5128 | 854.9192  |
| CardioEmbolicStroke | MF0098 | MR Egger                  | 9 | -0.0335 | 0.0697 | 0.6454 | 0.0064  | 0.0178 | 0.7314 | 6.6573  | 0.4654 | 3786.1184 |
| CardioEmbolicStroke | MF0098 | Weighted median           | 9 | -0.0055 | 0.0141 | 0.6962 | 0.0064  | 0.0178 | 0.7314 | 6.6573  | 0.4654 | 3786.1184 |
| CardioEmbolicStroke | MF0098 | Inverse variance weighted | 9 | -0.0089 | 0.0106 | 0.4039 | 0.0064  | 0.0178 | 0.7314 | 6.6573  | 0.4654 | 3786.1184 |
| CardioEmbolicStroke | MF0098 | Simple mode               | 9 | -0.0224 | 0.0245 | 0.3862 | 0.0064  | 0.0178 | 0.7314 | 6.6573  | 0.4654 | 3786.1184 |
| CardioEmbolicStroke | MF0098 | Weighted mode             | 9 | 0.0000  | 0.0218 | 0.9988 | 0.0064  | 0.0178 | 0.7314 | 6.6573  | 0.4654 | 3786.1184 |
| CardioEmbolicStroke | MF0100 | MR Egger                  | 9 | -0.6764 | 0.8082 | 0.4303 | 0.1624  | 0.2062 | 0.4568 | 8.2119  | 0.3143 | 117.7049  |
| CardioEmbolicStroke | MF0100 | Weighted median           | 9 | -0.0711 | 0.1600 | 0.6567 | 0.1624  | 0.2062 | 0.4568 | 8.2119  | 0.3143 | 117.7049  |
| CardioEmbolicStroke | MF0100 | Inverse variance weighted | 9 | -0.0474 | 0.1205 | 0.6943 | 0.1624  | 0.2062 | 0.4568 | 8.2119  | 0.3143 | 117.7049  |
| CardioEmbolicStroke | MF0100 | Simple mode               | 9 | -0.2511 | 0.2810 | 0.3977 | 0.1624  | 0.2062 | 0.4568 | 8.2119  | 0.3143 | 117.7049  |
| CardioEmbolicStroke | MF0100 | Weighted mode             | 9 | -0.2464 | 0.2661 | 0.3816 | 0.1624  | 0.2062 | 0.4568 | 8.2119  | 0.3143 | 117.7049  |
| CardioEmbolicStroke | MF0101 | MR Egger                  | 9 | 0.2641  | 0.3941 | 0.5242 | -0.0574 | 0.1005 | 0.5861 | 14.7885 | 0.0388 | 372.2976  |
| CardioEmbolicStroke | MF0101 | Weighted median           | 9 | 0.0685  | 0.0589 | 0.2450 | -0.0574 | 0.1005 | 0.5861 | 14.7885 | 0.0388 | 372.2976  |
| CardioEmbolicStroke | MF0101 | Inverse variance weighted | 9 | 0.0419  | 0.0577 | 0.4673 | -0.0574 | 0.1005 | 0.5861 | 14.7885 | 0.0388 | 372.2976  |
| CardioEmbolicStroke | MF0101 | Simple mode               | 9 | 0.0833  | 0.0798 | 0.3268 | -0.0574 | 0.1005 | 0.5861 | 14.7885 | 0.0388 | 372.2976  |
| CardioEmbolicStroke | MF0101 | Weighted mode             | 9 | 0.0726  | 0.0827 | 0.4059 | -0.0574 | 0.1005 | 0.5861 | 14.7885 | 0.0388 | 372.2976  |

|                     |                                          |                           |   |         |        |        |         |        |        |         |        |           |
|---------------------|------------------------------------------|---------------------------|---|---------|--------|--------|---------|--------|--------|---------|--------|-----------|
| CardioEmbolicStroke | MF0102                                   | MR Egger                  | 9 | 0.3629  | 0.3326 | 0.3113 | -0.0844 | 0.0848 | 0.3528 | 14.5117 | 0.0694 | 560.2807  |
| CardioEmbolicStroke | MF0102                                   | Weighted median           | 9 | 0.0235  | 0.0554 | 0.6712 | -0.0844 | 0.0848 | 0.3528 | 14.5117 | 0.0694 | 560.2807  |
| CardioEmbolicStroke | MF0102                                   | Inverse variance weighted | 9 | 0.0358  | 0.0508 | 0.4811 | -0.0844 | 0.0848 | 0.3528 | 14.5117 | 0.0694 | 560.2807  |
| CardioEmbolicStroke | MF0102                                   | Simple mode               | 9 | 0.0362  | 0.1107 | 0.7522 | -0.0844 | 0.0848 | 0.3528 | 14.5117 | 0.0694 | 560.2807  |
| CardioEmbolicStroke | MF0102                                   | Weighted mode             | 9 | 0.1063  | 0.0924 | 0.2831 | -0.0844 | 0.0848 | 0.3528 | 14.5117 | 0.0694 | 560.2807  |
| CardioEmbolicStroke | MF0103                                   | MR Egger                  | 9 | -0.0882 | 0.1654 | 0.6101 | 0.0312  | 0.0422 | 0.4837 | 12.8097 | 0.0769 | 1070.9082 |
| CardioEmbolicStroke | MF0103                                   | Weighted median           | 9 | 0.0101  | 0.0287 | 0.7246 | 0.0312  | 0.0422 | 0.4837 | 12.8097 | 0.0769 | 1070.9082 |
| CardioEmbolicStroke | MF0103                                   | Inverse variance weighted | 9 | 0.0326  | 0.0246 | 0.1847 | 0.0312  | 0.0422 | 0.4837 | 12.8097 | 0.0769 | 1070.9082 |
| CardioEmbolicStroke | MF0103                                   | Simple mode               | 9 | 0.1064  | 0.0593 | 0.1106 | 0.0312  | 0.0422 | 0.4837 | 12.8097 | 0.0769 | 1070.9082 |
| CardioEmbolicStroke | MF0103                                   | Weighted mode             | 9 | -0.0184 | 0.0481 | 0.7118 | 0.0312  | 0.0422 | 0.4837 | 12.8097 | 0.0769 | 1070.9082 |
| CardioEmbolicStroke | c_Bacilli                                | MR Egger                  | 9 | 0.2983  | 0.2864 | 0.3322 | -0.0881 | 0.0731 | 0.2672 | 4.7332  | 0.7857 | 878.8692  |
| CardioEmbolicStroke | c_Bacilli                                | Weighted median           | 9 | -0.0385 | 0.0559 | 0.4908 | -0.0881 | 0.0731 | 0.2672 | 4.7332  | 0.7857 | 878.8692  |
| CardioEmbolicStroke | c_Bacilli                                | Inverse variance weighted | 9 | -0.0428 | 0.0438 | 0.3279 | -0.0881 | 0.0731 | 0.2672 | 4.7332  | 0.7857 | 878.8692  |
| CardioEmbolicStroke | c_Bacilli                                | Simple mode               | 9 | -0.0908 | 0.0965 | 0.3744 | -0.0881 | 0.0731 | 0.2672 | 4.7332  | 0.7857 | 878.8692  |
| CardioEmbolicStroke | c_Bacilli                                | Weighted mode             | 9 | 0.0555  | 0.0909 | 0.5583 | -0.0881 | 0.0731 | 0.2672 | 4.7332  | 0.7857 | 878.8692  |
| CardioEmbolicStroke | c_Betaproteobacteria                     | MR Egger                  | 9 | 0.2669  | 0.5408 | 0.6368 | -0.0820 | 0.1380 | 0.5712 | 2.6480  | 0.9155 | 518.7075  |
| CardioEmbolicStroke | c_Betaproteobacteria                     | Weighted median           | 9 | -0.0508 | 0.1086 | 0.6403 | -0.0820 | 0.1380 | 0.5712 | 2.6480  | 0.9155 | 518.7075  |
| CardioEmbolicStroke | c_Betaproteobacteria                     | Inverse variance weighted | 9 | -0.0506 | 0.0826 | 0.5404 | -0.0820 | 0.1380 | 0.5712 | 2.6480  | 0.9155 | 518.7075  |
| CardioEmbolicStroke | c_Betaproteobacteria                     | Simple mode               | 9 | -0.0792 | 0.1619 | 0.6378 | -0.0820 | 0.1380 | 0.5712 | 2.6480  | 0.9155 | 518.7075  |
| CardioEmbolicStroke | c_Betaproteobacteria                     | Weighted mode             | 9 | -0.0751 | 0.1516 | 0.6337 | -0.0820 | 0.1380 | 0.5712 | 2.6480  | 0.9155 | 518.7075  |
| CardioEmbolicStroke | c_Negativicutes                          | MR Egger                  | 9 | 0.1403  | 0.4370 | 0.7576 | -0.0160 | 0.1115 | 0.8901 | 6.8172  | 0.4482 | 363.7848  |
| CardioEmbolicStroke | c_Negativicutes                          | Weighted median           | 9 | 0.0817  | 0.0895 | 0.3612 | -0.0160 | 0.1115 | 0.8901 | 6.8172  | 0.4482 | 363.7848  |
| CardioEmbolicStroke | c_Negativicutes                          | Inverse variance weighted | 9 | 0.0784  | 0.0668 | 0.2407 | -0.0160 | 0.1115 | 0.8901 | 6.8172  | 0.4482 | 363.7848  |
| CardioEmbolicStroke | c_Negativicutes                          | Simple mode               | 9 | 0.1950  | 0.1465 | 0.2201 | -0.0160 | 0.1115 | 0.8901 | 6.8172  | 0.4482 | 363.7848  |
| CardioEmbolicStroke | c_Negativicutes                          | Weighted mode             | 9 | 0.1806  | 0.1357 | 0.2200 | -0.0160 | 0.1115 | 0.8901 | 6.8172  | 0.4482 | 363.7848  |
| CardioEmbolicStroke | f_Acidaminococcaceae                     | MR Egger                  | 9 | -0.4272 | 0.5348 | 0.4506 | 0.1278  | 0.1364 | 0.3803 | 6.4429  | 0.4891 | 197.0186  |
| CardioEmbolicStroke | f_Acidaminococcaceae                     | Weighted median           | 9 | 0.1087  | 0.1044 | 0.2979 | 0.1278  | 0.1364 | 0.3803 | 6.4429  | 0.4891 | 197.0186  |
| CardioEmbolicStroke | f_Acidaminococcaceae                     | Inverse variance weighted | 9 | 0.0676  | 0.0818 | 0.4080 | 0.1278  | 0.1364 | 0.3803 | 6.4429  | 0.4891 | 197.0186  |
| CardioEmbolicStroke | f_Acidaminococcaceae                     | Simple mode               | 9 | 0.1144  | 0.1600 | 0.4950 | 0.1278  | 0.1364 | 0.3803 | 6.4429  | 0.4891 | 197.0186  |
| CardioEmbolicStroke | f_Acidaminococcaceae                     | Weighted mode             | 9 | 0.1144  | 0.1436 | 0.4486 | 0.1278  | 0.1364 | 0.3803 | 6.4429  | 0.4891 | 197.0186  |
| CardioEmbolicStroke | f_Actinomycetaceae                       | MR Egger                  | 9 | 0.3629  | 0.2579 | 0.2021 | -0.0871 | 0.0658 | 0.2269 | 7.5645  | 0.4771 | 819.0604  |
| CardioEmbolicStroke | f_Actinomycetaceae                       | Weighted median           | 9 | 0.0485  | 0.0515 | 0.3461 | -0.0871 | 0.0658 | 0.2269 | 7.5645  | 0.4771 | 819.0604  |
| CardioEmbolicStroke | f_Actinomycetaceae                       | Inverse variance weighted | 9 | 0.0253  | 0.0394 | 0.5204 | -0.0871 | 0.0658 | 0.2269 | 7.5645  | 0.4771 | 819.0604  |
| CardioEmbolicStroke | f_Actinomycetaceae                       | Simple mode               | 9 | 0.0498  | 0.0742 | 0.5216 | -0.0871 | 0.0658 | 0.2269 | 7.5645  | 0.4771 | 819.0604  |
| CardioEmbolicStroke | f_Actinomycetaceae                       | Weighted mode             | 9 | 0.0548  | 0.0708 | 0.4611 | -0.0871 | 0.0658 | 0.2269 | 7.5645  | 0.4771 | 819.0604  |
| CardioEmbolicStroke | f_Aerococcaceae                          | MR Egger                  | 9 | 0.4485  | 0.6368 | 0.5040 | -0.0973 | 0.1625 | 0.5681 | 16.9609 | 0.0176 | 148.8408  |
| CardioEmbolicStroke | f_Aerococcaceae                          | Weighted median           | 9 | 0.0700  | 0.0948 | 0.4598 | -0.0973 | 0.1625 | 0.5681 | 16.9609 | 0.0176 | 148.8408  |
| CardioEmbolicStroke | f_Aerococcaceae                          | Inverse variance weighted | 9 | 0.0716  | 0.0934 | 0.4433 | -0.0973 | 0.1625 | 0.5681 | 16.9609 | 0.0176 | 148.8408  |
| CardioEmbolicStroke | f_Aerococcaceae                          | Simple mode               | 9 | -0.0003 | 0.1612 | 0.9985 | -0.0973 | 0.1625 | 0.5681 | 16.9609 | 0.0176 | 148.8408  |
| CardioEmbolicStroke | f_Aerococcaceae                          | Weighted mode             | 9 | 0.0184  | 0.1362 | 0.8961 | -0.0973 | 0.1625 | 0.5681 | 16.9609 | 0.0176 | 148.8408  |
| CardioEmbolicStroke | f_Bacillaceae                            | MR Egger                  | 9 | -0.0397 | 0.3863 | 0.9210 | 0.0234  | 0.0986 | 0.8193 | 8.1060  | 0.3233 | 474.8562  |
| CardioEmbolicStroke | f_Bacillaceae                            | Weighted median           | 9 | 0.0577  | 0.0716 | 0.4198 | 0.0234  | 0.0986 | 0.8193 | 8.1060  | 0.3233 | 474.8562  |
| CardioEmbolicStroke | f_Bacillaceae                            | Inverse variance weighted | 9 | 0.0509  | 0.0554 | 0.3589 | 0.0234  | 0.0986 | 0.8193 | 8.1060  | 0.3233 | 474.8562  |
| CardioEmbolicStroke | f_Bacillaceae                            | Simple mode               | 9 | 0.0753  | 0.1110 | 0.5166 | 0.0234  | 0.0986 | 0.8193 | 8.1060  | 0.3233 | 474.8562  |
| CardioEmbolicStroke | f_Bacillaceae                            | Weighted mode             | 9 | 0.0915  | 0.1020 | 0.3962 | 0.0234  | 0.0986 | 0.8193 | 8.1060  | 0.3233 | 474.8562  |
| CardioEmbolicStroke | f_Bifidobacteriaceae                     | MR Egger                  | 9 | 0.2993  | 0.5061 | 0.5728 | -0.0774 | 0.1291 | 0.5678 | 3.8318  | 0.7989 | 504.5037  |
| CardioEmbolicStroke | f_Bifidobacteriaceae                     | Weighted median           | 9 | -0.0056 | 0.0998 | 0.9555 | -0.0774 | 0.1291 | 0.5678 | 3.8318  | 0.7989 | 504.5037  |
| CardioEmbolicStroke | f_Bifidobacteriaceae                     | Inverse variance weighted | 9 | -0.0004 | 0.0773 | 0.9957 | -0.0774 | 0.1291 | 0.5678 | 3.8318  | 0.7989 | 504.5037  |
| CardioEmbolicStroke | f_Bifidobacteriaceae                     | Simple mode               | 9 | 0.0593  | 0.1459 | 0.6950 | -0.0774 | 0.1291 | 0.5678 | 3.8318  | 0.7989 | 504.5037  |
| CardioEmbolicStroke | f_Bifidobacteriaceae                     | Weighted mode             | 9 | 0.0304  | 0.1427 | 0.8368 | -0.0774 | 0.1291 | 0.5678 | 3.8318  | 0.7989 | 504.5037  |
| CardioEmbolicStroke | f_Burkholderiaceae                       | MR Egger                  | 9 | -0.0422 | 0.5340 | 0.9392 | 0.0041  | 0.1362 | 0.9767 | 5.1217  | 0.6451 | 393.6058  |
| CardioEmbolicStroke | f_Burkholderiaceae                       | Weighted median           | 9 | 0.0193  | 0.1075 | 0.8575 | 0.0041  | 0.1362 | 0.9767 | 5.1217  | 0.6451 | 393.6058  |
| CardioEmbolicStroke | f_Burkholderiaceae                       | Inverse variance weighted | 9 | -0.0262 | 0.0816 | 0.7479 | 0.0041  | 0.1362 | 0.9767 | 5.1217  | 0.6451 | 393.6058  |
| CardioEmbolicStroke | f_Burkholderiaceae                       | Simple mode               | 9 | 0.0606  | 0.1656 | 0.7237 | 0.0041  | 0.1362 | 0.9767 | 5.1217  | 0.6451 | 393.6058  |
| CardioEmbolicStroke | f_Burkholderiaceae                       | Weighted mode             | 9 | 0.0649  | 0.1567 | 0.6898 | 0.0041  | 0.1362 | 0.9767 | 5.1217  | 0.6451 | 393.6058  |
| CardioEmbolicStroke | f_Clostridiales_Family_XI_Incertae_Sedis | MR Egger                  | 9 | 0.5784  | 0.5416 | 0.3209 | -0.1338 | 0.1382 | 0.3652 | 11.2073 | 0.1902 | 130.4527  |
| CardioEmbolicStroke | f_Clostridiales_Family_XI_Incertae_Sedis | Weighted median           | 9 | 0.0229  | 0.0946 | 0.8084 | -0.1338 | 0.1382 | 0.3652 | 11.2073 | 0.1902 | 130.4527  |
| CardioEmbolicStroke | f_Clostridiales_Family_XI_Incertae_Sedis | Inverse variance weighted | 9 | 0.0603  | 0.0825 | 0.4648 | -0.1338 | 0.1382 | 0.3652 | 11.2073 | 0.1902 | 130.4527  |
| CardioEmbolicStroke | f_Clostridiales_Family_XI_Incertae_Sedis | Simple mode               | 9 | 0.0034  | 0.1357 | 0.9809 | -0.1338 | 0.1382 | 0.3652 | 11.2073 | 0.1902 | 130.4527  |
| CardioEmbolicStroke | f_Clostridiales_Family_XI_Incertae_Sedis | Weighted mode             | 9 | 0.0148  | 0.1369 | 0.9165 | -0.1338 | 0.1382 | 0.3652 | 11.2073 | 0.1902 | 130.4527  |
| CardioEmbolicStroke | f_Coriobacteriaceae                      | MR Egger                  | 9 | -0.2461 | 0.5192 | 0.6500 | 0.0773  | 0.1325 | 0.5779 | 11.4821 | 0.1189 | 298.3917  |

|                     |                         |                           |   |         |        |        |         |        |        |         |        |          |
|---------------------|-------------------------|---------------------------|---|---------|--------|--------|---------|--------|--------|---------|--------|----------|
| CardioEmbolicStroke | f_Coriobacteriaceae     | Weighted median           | 9 | -0.0413 | 0.0860 | 0.6312 | 0.0773  | 0.1325 | 0.5779 | 11.4821 | 0.1189 | 298.3917 |
| CardioEmbolicStroke | f_Coriobacteriaceae     | Inverse variance weighted | 9 | 0.0533  | 0.0760 | 0.4827 | 0.0773  | 0.1325 | 0.5779 | 11.4821 | 0.1189 | 298.3917 |
| CardioEmbolicStroke | f_Coriobacteriaceae     | Simple mode               | 9 | -0.0590 | 0.1267 | 0.6539 | 0.0773  | 0.1325 | 0.5779 | 11.4821 | 0.1189 | 298.3917 |
| CardioEmbolicStroke | f_Coriobacteriaceae     | Weighted mode             | 9 | -0.0729 | 0.1114 | 0.5309 | 0.0773  | 0.1325 | 0.5779 | 11.4821 | 0.1189 | 298.3917 |
| CardioEmbolicStroke | f_Enterobacteriaceae    | MR Egger                  | 9 | 0.1005  | 0.5441 | 0.8586 | -0.0630 | 0.1388 | 0.6635 | 3.7606  | 0.8069 | 312.2604 |
| CardioEmbolicStroke | f_Enterobacteriaceae    | Weighted median           | 9 | -0.0755 | 0.1100 | 0.4925 | -0.0630 | 0.1388 | 0.6635 | 3.7606  | 0.8069 | 312.2604 |
| CardioEmbolicStroke | f_Enterobacteriaceae    | Inverse variance weighted | 9 | -0.1436 | 0.0832 | 0.0842 | -0.0630 | 0.1388 | 0.6635 | 3.7606  | 0.8069 | 312.2604 |
| CardioEmbolicStroke | f_Enterobacteriaceae    | Simple mode               | 9 | -0.0548 | 0.1626 | 0.7446 | -0.0630 | 0.1388 | 0.6635 | 3.7606  | 0.8069 | 312.2604 |
| CardioEmbolicStroke | f_Enterobacteriaceae    | Weighted mode             | 9 | -0.0495 | 0.1625 | 0.7684 | -0.0630 | 0.1388 | 0.6635 | 3.7606  | 0.8069 | 312.2604 |
| CardioEmbolicStroke | f_Eubacteriaceae        | MR Egger                  | 9 | 0.7501  | 0.3644 | 0.0785 | -0.1893 | 0.0930 | 0.0812 | 10.8026 | 0.2131 | 360.5770 |
| CardioEmbolicStroke | f_Eubacteriaceae        | Weighted median           | 9 | 0.0940  | 0.0755 | 0.2131 | -0.1893 | 0.0930 | 0.0812 | 10.8026 | 0.2131 | 360.5770 |
| CardioEmbolicStroke | f_Eubacteriaceae        | Inverse variance weighted | 9 | 0.0169  | 0.0647 | 0.7944 | -0.1893 | 0.0930 | 0.0812 | 10.8026 | 0.2131 | 360.5770 |
| CardioEmbolicStroke | f_Eubacteriaceae        | Simple mode               | 9 | 0.1624  | 0.1414 | 0.2838 | -0.1893 | 0.0930 | 0.0812 | 10.8026 | 0.2131 | 360.5770 |
| CardioEmbolicStroke | f_Eubacteriaceae        | Weighted mode             | 9 | 0.1600  | 0.1227 | 0.2283 | -0.1893 | 0.0930 | 0.0812 | 10.8026 | 0.2131 | 360.5770 |
| CardioEmbolicStroke | f_Lachnospiraceae       | MR Egger                  | 9 | 0.3969  | 0.2628 | 0.1748 | -0.0941 | 0.0670 | 0.2031 | 11.5853 | 0.1707 | 544.7439 |
| CardioEmbolicStroke | f_Lachnospiraceae       | Weighted median           | 9 | 0.0272  | 0.0519 | 0.6004 | -0.0941 | 0.0670 | 0.2031 | 11.5853 | 0.1707 | 544.7439 |
| CardioEmbolicStroke | f_Lachnospiraceae       | Inverse variance weighted | 9 | 0.0322  | 0.0425 | 0.4486 | -0.0941 | 0.0670 | 0.2031 | 11.5853 | 0.1707 | 544.7439 |
| CardioEmbolicStroke | f_Lachnospiraceae       | Simple mode               | 9 | -0.0411 | 0.0900 | 0.6601 | -0.0941 | 0.0670 | 0.2031 | 11.5853 | 0.1707 | 544.7439 |
| CardioEmbolicStroke | f_Lachnospiraceae       | Weighted mode             | 9 | 0.0597  | 0.0836 | 0.4952 | -0.0941 | 0.0670 | 0.2031 | 11.5853 | 0.1707 | 544.7439 |
| CardioEmbolicStroke | f_Lactobacillaceae      | MR Egger                  | 9 | 0.4064  | 0.4198 | 0.3652 | -0.1163 | 0.1071 | 0.3135 | 6.5495  | 0.5859 | 445.9104 |
| CardioEmbolicStroke | f_Lactobacillaceae      | Weighted median           | 9 | -0.0718 | 0.0860 | 0.4040 | -0.1163 | 0.1071 | 0.3135 | 6.5495  | 0.5859 | 445.9104 |
| CardioEmbolicStroke | f_Lactobacillaceae      | Inverse variance weighted | 9 | -0.0440 | 0.0642 | 0.4930 | -0.1163 | 0.1071 | 0.3135 | 6.5495  | 0.5859 | 445.9104 |
| CardioEmbolicStroke | f_Lactobacillaceae      | Simple mode               | 9 | -0.1391 | 0.1526 | 0.3887 | -0.1163 | 0.1071 | 0.3135 | 6.5495  | 0.5859 | 445.9104 |
| CardioEmbolicStroke | f_Lactobacillaceae      | Weighted mode             | 9 | -0.1166 | 0.1505 | 0.4607 | -0.1163 | 0.1071 | 0.3135 | 6.5495  | 0.5859 | 445.9104 |
| CardioEmbolicStroke | f_Leuconostocaceae      | MR Egger                  | 9 | -0.3823 | 0.6135 | 0.5530 | 0.0776  | 0.1565 | 0.6351 | 5.3349  | 0.6192 | 207.0447 |
| CardioEmbolicStroke | f_Leuconostocaceae      | Weighted median           | 9 | -0.1256 | 0.1223 | 0.3044 | 0.0776  | 0.1565 | 0.6351 | 5.3349  | 0.6192 | 207.0447 |
| CardioEmbolicStroke | f_Leuconostocaceae      | Inverse variance weighted | 9 | -0.0815 | 0.0938 | 0.3845 | 0.0776  | 0.1565 | 0.6351 | 5.3349  | 0.6192 | 207.0447 |
| CardioEmbolicStroke | f_Leuconostocaceae      | Simple mode               | 9 | -0.2665 | 0.2064 | 0.2327 | 0.0776  | 0.1565 | 0.6351 | 5.3349  | 0.6192 | 207.0447 |
| CardioEmbolicStroke | f_Leuconostocaceae      | Weighted mode             | 9 | -0.2609 | 0.2243 | 0.2783 | 0.0776  | 0.1565 | 0.6351 | 5.3349  | 0.6192 | 207.0447 |
| CardioEmbolicStroke | f_Neisseriaceae         | MR Egger                  | 9 | 1.4650  | 0.5899 | 0.0420 | -0.3599 | 0.1505 | 0.0481 | 10.3203 | 0.2433 | 106.4985 |
| CardioEmbolicStroke | f_Neisseriaceae         | Weighted median           | 9 | -0.0616 | 0.1291 | 0.6330 | -0.3599 | 0.1505 | 0.0481 | 10.3203 | 0.2433 | 106.4985 |
| CardioEmbolicStroke | f_Neisseriaceae         | Inverse variance weighted | 9 | 0.0709  | 0.1025 | 0.4890 | -0.3599 | 0.1505 | 0.0481 | 10.3203 | 0.2433 | 106.4985 |
| CardioEmbolicStroke | f_Neisseriaceae         | Simple mode               | 9 | -0.1365 | 0.1966 | 0.5070 | -0.3599 | 0.1505 | 0.0481 | 10.3203 | 0.2433 | 106.4985 |
| CardioEmbolicStroke | f_Neisseriaceae         | Weighted mode             | 9 | -0.1365 | 0.2075 | 0.5290 | -0.3599 | 0.1505 | 0.0481 | 10.3203 | 0.2433 | 106.4985 |
| CardioEmbolicStroke | f_Peptostreptococcaceae | MR Egger                  | 9 | -0.4418 | 0.4344 | 0.3430 | 0.1456  | 0.1108 | 0.2304 | 8.1164  | 0.4222 | 298.7255 |
| CardioEmbolicStroke | f_Peptostreptococcaceae | Weighted median           | 9 | 0.0965  | 0.0903 | 0.2848 | 0.1456  | 0.1108 | 0.2304 | 8.1164  | 0.4222 | 298.7255 |
| CardioEmbolicStroke | f_Peptostreptococcaceae | Inverse variance weighted | 9 | 0.1221  | 0.0669 | 0.0677 | 0.1456  | 0.1108 | 0.2304 | 8.1164  | 0.4222 | 298.7255 |
| CardioEmbolicStroke | f_Peptostreptococcaceae | Simple mode               | 9 | 0.2601  | 0.1519 | 0.1251 | 0.1456  | 0.1108 | 0.2304 | 8.1164  | 0.4222 | 298.7255 |
| CardioEmbolicStroke | f_Peptostreptococcaceae | Weighted mode             | 9 | 0.0628  | 0.1384 | 0.6623 | 0.1456  | 0.1108 | 0.2304 | 8.1164  | 0.4222 | 298.7255 |
| CardioEmbolicStroke | f_Porphyromonadaceae    | MR Egger                  | 9 | 0.2059  | 0.3120 | 0.5305 | -0.0670 | 0.0796 | 0.4278 | 11.0955 | 0.1345 | 525.3170 |
| CardioEmbolicStroke | f_Porphyromonadaceae    | Weighted median           | 9 | -0.0643 | 0.0530 | 0.2246 | -0.0670 | 0.0796 | 0.4278 | 11.0955 | 0.1345 | 525.3170 |
| CardioEmbolicStroke | f_Porphyromonadaceae    | Inverse variance weighted | 9 | -0.0537 | 0.0468 | 0.2514 | -0.0670 | 0.0796 | 0.4278 | 11.0955 | 0.1345 | 525.3170 |
| CardioEmbolicStroke | f_Porphyromonadaceae    | Simple mode               | 9 | -0.1104 | 0.1050 | 0.3239 | -0.0670 | 0.0796 | 0.4278 | 11.0955 | 0.1345 | 525.3170 |
| CardioEmbolicStroke | f_Porphyromonadaceae    | Weighted mode             | 9 | -0.0979 | 0.0857 | 0.2867 | -0.0670 | 0.0796 | 0.4278 | 11.0955 | 0.1345 | 525.3170 |
| CardioEmbolicStroke | f_Prevotellaceae        | MR Egger                  | 9 | -0.2987 | 0.9300 | 0.7575 | 0.0082  | 0.2372 | 0.9734 | 10.0533 | 0.1856 | 45.5998  |
| CardioEmbolicStroke | f_Prevotellaceae        | Weighted median           | 9 | -0.3260 | 0.1639 | 0.0468 | 0.0082  | 0.2372 | 0.9734 | 10.0533 | 0.1856 | 45.5998  |
| CardioEmbolicStroke | f_Prevotellaceae        | Inverse variance weighted | 9 | -0.2669 | 0.1330 | 0.0447 | 0.0082  | 0.2372 | 0.9734 | 10.0533 | 0.1856 | 45.5998  |
| CardioEmbolicStroke | f_Prevotellaceae        | Simple mode               | 9 | -0.3527 | 0.2525 | 0.2000 | 0.0082  | 0.2372 | 0.9734 | 10.0533 | 0.1856 | 45.5998  |
| CardioEmbolicStroke | f_Prevotellaceae        | Weighted mode             | 9 | -0.3489 | 0.2513 | 0.2025 | 0.0082  | 0.2372 | 0.9734 | 10.0533 | 0.1856 | 45.5998  |
| CardioEmbolicStroke | f_Staphylococcaceae     | MR Egger                  | 9 | 0.4069  | 0.4604 | 0.4061 | -0.0760 | 0.1175 | 0.5382 | 1.8768  | 0.9663 | 462.0563 |
| CardioEmbolicStroke | f_Staphylococcaceae     | Weighted median           | 9 | 0.1391  | 0.0896 | 0.1207 | -0.0760 | 0.1175 | 0.5382 | 1.8768  | 0.9663 | 462.0563 |
| CardioEmbolicStroke | f_Staphylococcaceae     | Inverse variance weighted | 9 | 0.1125  | 0.0704 | 0.1097 | -0.0760 | 0.1175 | 0.5382 | 1.8768  | 0.9663 | 462.0563 |
| CardioEmbolicStroke | f_Staphylococcaceae     | Simple mode               | 9 | 0.1530  | 0.1354 | 0.2914 | -0.0760 | 0.1175 | 0.5382 | 1.8768  | 0.9663 | 462.0563 |
| CardioEmbolicStroke | f_Staphylococcaceae     | Weighted mode             | 9 | 0.1553  | 0.1211 | 0.2356 | -0.0760 | 0.1175 | 0.5382 | 1.8768  | 0.9663 | 462.0563 |
| CardioEmbolicStroke | f_Streptococcaceae      | MR Egger                  | 9 | 0.3747  | 0.3539 | 0.3249 | -0.1044 | 0.0903 | 0.2854 | 4.2032  | 0.8383 | 802.4325 |
| CardioEmbolicStroke | f_Streptococcaceae      | Weighted median           | 9 | -0.0411 | 0.0699 | 0.5570 | -0.1044 | 0.0903 | 0.2854 | 4.2032  | 0.8383 | 802.4325 |
| CardioEmbolicStroke | f_Streptococcaceae      | Inverse variance weighted | 9 | -0.0298 | 0.0541 | 0.5817 | -0.1044 | 0.0903 | 0.2854 | 4.2032  | 0.8383 | 802.4325 |
| CardioEmbolicStroke | f_Streptococcaceae      | Simple mode               | 9 | -0.1073 | 0.1132 | 0.3710 | -0.1044 | 0.0903 | 0.2854 | 4.2032  | 0.8383 | 802.4325 |
| CardioEmbolicStroke | f_Streptococcaceae      | Weighted mode             | 9 | 0.0778  | 0.1097 | 0.4985 | -0.1044 | 0.0903 | 0.2854 | 4.2032  | 0.8383 | 802.4325 |
| CardioEmbolicStroke | f_Sutterellaceae        | MR Egger                  | 9 | 0.5438  | 0.6838 | 0.4526 | -0.1515 | 0.1744 | 0.4139 | 3.5759  | 0.8932 | 343.0486 |
| CardioEmbolicStroke | f_Sutterellaceae        | Weighted median           | 9 | 0.0018  | 0.1408 | 0.9896 | -0.1515 | 0.1744 | 0.4139 | 3.5759  | 0.8932 | 343.0486 |

|                     |                   |                           |   |         |        |        |         |        |        |         |        |          |
|---------------------|-------------------|---------------------------|---|---------|--------|--------|---------|--------|--------|---------|--------|----------|
| CardioEmbolicStroke | f_Sutterellaceae  | Inverse variance weighted | 9 | -0.0431 | 0.1045 | 0.6797 | -0.1515 | 0.1744 | 0.4139 | 3.5759  | 0.8932 | 343.0486 |
| CardioEmbolicStroke | f_Sutterellaceae  | Simple mode               | 9 | 0.0127  | 0.1993 | 0.9506 | -0.1515 | 0.1744 | 0.4139 | 3.5759  | 0.8932 | 343.0486 |
| CardioEmbolicStroke | f_Sutterellaceae  | Weighted mode             | 9 | 0.0384  | 0.1808 | 0.8371 | -0.1515 | 0.1744 | 0.4139 | 3.5759  | 0.8932 | 343.0486 |
| CardioEmbolicStroke | f_Veillonellaceae | MR Egger                  | 9 | 0.4493  | 0.4909 | 0.3906 | -0.0995 | 0.1252 | 0.4531 | 5.0885  | 0.6492 | 370.9469 |
| CardioEmbolicStroke | f_Veillonellaceae | Weighted median           | 9 | 0.1264  | 0.0969 | 0.1920 | -0.0995 | 0.1252 | 0.4531 | 5.0885  | 0.6492 | 370.9469 |
| CardioEmbolicStroke | f_Veillonellaceae | Inverse variance weighted | 9 | 0.0639  | 0.0750 | 0.3942 | -0.0995 | 0.1252 | 0.4531 | 5.0885  | 0.6492 | 370.9469 |
| CardioEmbolicStroke | f_Veillonellaceae | Simple mode               | 9 | 0.1537  | 0.1601 | 0.3653 | -0.0995 | 0.1252 | 0.4531 | 5.0885  | 0.6492 | 370.9469 |
| CardioEmbolicStroke | f_Veillonellaceae | Weighted mode             | 9 | 0.1720  | 0.1593 | 0.3118 | -0.0995 | 0.1252 | 0.4531 | 5.0885  | 0.6492 | 370.9469 |
| CardioEmbolicStroke | g_Abiotrophia     | MR Egger                  | 9 | 0.4161  | 0.7714 | 0.6063 | -0.0890 | 0.1968 | 0.6647 | 19.3008 | 0.0073 | 108.8444 |
| CardioEmbolicStroke | g_Abiotrophia     | Weighted median           | 9 | 0.0269  | 0.1097 | 0.8062 | -0.0890 | 0.1968 | 0.6647 | 19.3008 | 0.0073 | 108.8444 |
| CardioEmbolicStroke | g_Abiotrophia     | Inverse variance weighted | 9 | 0.0712  | 0.1119 | 0.5244 | -0.0890 | 0.1968 | 0.6647 | 19.3008 | 0.0073 | 108.8444 |
| CardioEmbolicStroke | g_Abiotrophia     | Simple mode               | 9 | -0.0310 | 0.2074 | 0.8848 | -0.0890 | 0.1968 | 0.6647 | 19.3008 | 0.0073 | 108.8444 |
| CardioEmbolicStroke | g_Abiotrophia     | Weighted mode             | 9 | -0.0136 | 0.1549 | 0.9323 | -0.0890 | 0.1968 | 0.6647 | 19.3008 | 0.0073 | 108.8444 |
| CardioEmbolicStroke | g_Acidaminococcus | MR Egger                  | 9 | -0.3398 | 0.5452 | 0.5529 | 0.1071  | 0.1391 | 0.4665 | 6.5219  | 0.4803 | 219.1958 |
| CardioEmbolicStroke | g_Acidaminococcus | Weighted median           | 9 | 0.1603  | 0.1083 | 0.1387 | 0.1071  | 0.1391 | 0.4665 | 6.5219  | 0.4803 | 219.1958 |
| CardioEmbolicStroke | g_Acidaminococcus | Inverse variance weighted | 9 | 0.0750  | 0.0833 | 0.3679 | 0.1071  | 0.1391 | 0.4665 | 6.5219  | 0.4803 | 219.1958 |
| CardioEmbolicStroke | g_Acidaminococcus | Simple mode               | 9 | 0.2046  | 0.1828 | 0.2955 | 0.1071  | 0.1391 | 0.4665 | 6.5219  | 0.4803 | 219.1958 |
| CardioEmbolicStroke | g_Acidaminococcus | Weighted mode             | 9 | 0.2247  | 0.1790 | 0.2446 | 0.1071  | 0.1391 | 0.4665 | 6.5219  | 0.4803 | 219.1958 |
| CardioEmbolicStroke | g_Actinomyces     | MR Egger                  | 9 | 0.2876  | 0.3709 | 0.4635 | -0.0754 | 0.0946 | 0.4520 | 5.4002  | 0.6113 | 417.3874 |
| CardioEmbolicStroke | g_Actinomyces     | Weighted median           | 9 | -0.0418 | 0.0753 | 0.5784 | -0.0754 | 0.0946 | 0.4520 | 5.4002  | 0.6113 | 417.3874 |
| CardioEmbolicStroke | g_Actinomyces     | Inverse variance weighted | 9 | -0.0043 | 0.0567 | 0.9402 | -0.0754 | 0.0946 | 0.4520 | 5.4002  | 0.6113 | 417.3874 |
| CardioEmbolicStroke | g_Actinomyces     | Simple mode               | 9 | -0.0509 | 0.1118 | 0.6607 | -0.0754 | 0.0946 | 0.4520 | 5.4002  | 0.6113 | 417.3874 |
| CardioEmbolicStroke | g_Actinomyces     | Weighted mode             | 9 | -0.0453 | 0.1025 | 0.6704 | -0.0754 | 0.0946 | 0.4520 | 5.4002  | 0.6113 | 417.3874 |
| CardioEmbolicStroke | g_Aggregatibacter | MR Egger                  | 9 | 1.5428  | 0.6566 | 0.0511 | -0.3820 | 0.1675 | 0.0566 | 12.2695 | 0.1396 | 81.4720  |
| CardioEmbolicStroke | g_Aggregatibacter | Weighted median           | 9 | -0.1190 | 0.1534 | 0.4379 | -0.3820 | 0.1675 | 0.0566 | 12.2695 | 0.1396 | 81.4720  |
| CardioEmbolicStroke | g_Aggregatibacter | Inverse variance weighted | 9 | 0.0632  | 0.1240 | 0.6102 | -0.3820 | 0.1675 | 0.0566 | 12.2695 | 0.1396 | 81.4720  |
| CardioEmbolicStroke | g_Aggregatibacter | Simple mode               | 9 | -0.2271 | 0.2636 | 0.4141 | -0.3820 | 0.1675 | 0.0566 | 12.2695 | 0.1396 | 81.4720  |
| CardioEmbolicStroke | g_Aggregatibacter | Weighted mode             | 9 | -0.2271 | 0.2786 | 0.4387 | -0.3820 | 0.1675 | 0.0566 | 12.2695 | 0.1396 | 81.4720  |
| CardioEmbolicStroke | g_Alistipes       | MR Egger                  | 9 | 0.7402  | 0.7130 | 0.3337 | -0.2083 | 0.1819 | 0.2897 | 16.0631 | 0.0415 | 161.9553 |
| CardioEmbolicStroke | g_Alistipes       | Weighted median           | 9 | -0.0935 | 0.1173 | 0.4254 | -0.2083 | 0.1819 | 0.2897 | 16.0631 | 0.0415 | 161.9553 |
| CardioEmbolicStroke | g_Alistipes       | Inverse variance weighted | 9 | -0.0668 | 0.1111 | 0.5474 | -0.2083 | 0.1819 | 0.2897 | 16.0631 | 0.0415 | 161.9553 |
| CardioEmbolicStroke | g_Alistipes       | Simple mode               | 9 | -0.1478 | 0.1938 | 0.4676 | -0.2083 | 0.1819 | 0.2897 | 16.0631 | 0.0415 | 161.9553 |
| CardioEmbolicStroke | g_Alistipes       | Weighted mode             | 9 | -0.1228 | 0.1870 | 0.5298 | -0.2083 | 0.1819 | 0.2897 | 16.0631 | 0.0415 | 161.9553 |
| CardioEmbolicStroke | g_Anaerococcus    | MR Egger                  | 9 | 0.8290  | 0.5467 | 0.1732 | -0.1808 | 0.1395 | 0.2361 | 8.2517  | 0.4093 | 85.1241  |
| CardioEmbolicStroke | g_Anaerococcus    | Weighted median           | 9 | 0.0511  | 0.1100 | 0.6423 | -0.1808 | 0.1395 | 0.2361 | 8.2517  | 0.4093 | 85.1241  |
| CardioEmbolicStroke | g_Anaerococcus    | Inverse variance weighted | 9 | 0.1289  | 0.0849 | 0.1291 | -0.1808 | 0.1395 | 0.2361 | 8.2517  | 0.4093 | 85.1241  |
| CardioEmbolicStroke | g_Anaerococcus    | Simple mode               | 9 | 0.0507  | 0.1402 | 0.7268 | -0.1808 | 0.1395 | 0.2361 | 8.2517  | 0.4093 | 85.1241  |
| CardioEmbolicStroke | g_Anaerococcus    | Weighted mode             | 9 | 0.0375  | 0.1369 | 0.7914 | -0.1808 | 0.1395 | 0.2361 | 8.2517  | 0.4093 | 85.1241  |
| CardioEmbolicStroke | g_Anaerofustis    | MR Egger                  | 9 | 0.7324  | 0.3304 | 0.0622 | -0.1817 | 0.0843 | 0.0681 | 8.1573  | 0.4183 | 443.2036 |
| CardioEmbolicStroke | g_Anaerofustis    | Weighted median           | 9 | 0.0649  | 0.0709 | 0.3607 | -0.1817 | 0.0843 | 0.0681 | 8.1573  | 0.4183 | 443.2036 |
| CardioEmbolicStroke | g_Anaerofustis    | Inverse variance weighted | 9 | 0.0285  | 0.0510 | 0.5761 | -0.1817 | 0.0843 | 0.0681 | 8.1573  | 0.4183 | 443.2036 |
| CardioEmbolicStroke | g_Anaerofustis    | Simple mode               | 9 | 0.0859  | 0.1047 | 0.4359 | -0.1817 | 0.0843 | 0.0681 | 8.1573  | 0.4183 | 443.2036 |
| CardioEmbolicStroke | g_Anaerofustis    | Weighted mode             | 9 | 0.0969  | 0.0965 | 0.3448 | -0.1817 | 0.0843 | 0.0681 | 8.1573  | 0.4183 | 443.2036 |
| CardioEmbolicStroke | g_Anaerostipes    | MR Egger                  | 9 | 0.4085  | 0.2983 | 0.2132 | -0.0865 | 0.0761 | 0.2930 | 7.6342  | 0.4700 | 350.7963 |
| CardioEmbolicStroke | g_Anaerostipes    | Weighted median           | 9 | 0.0563  | 0.0599 | 0.3474 | -0.0865 | 0.0761 | 0.2930 | 7.6342  | 0.4700 | 350.7963 |
| CardioEmbolicStroke | g_Anaerostipes    | Inverse variance weighted | 9 | 0.0734  | 0.0456 | 0.1076 | -0.0865 | 0.0761 | 0.2930 | 7.6342  | 0.4700 | 350.7963 |
| CardioEmbolicStroke | g_Anaerostipes    | Simple mode               | 9 | 0.0123  | 0.0889 | 0.8932 | -0.0865 | 0.0761 | 0.2930 | 7.6342  | 0.4700 | 350.7963 |
| CardioEmbolicStroke | g_Anaerostipes    | Weighted mode             | 9 | 0.0198  | 0.0863 | 0.8246 | -0.0865 | 0.0761 | 0.2930 | 7.6342  | 0.4700 | 350.7963 |
| CardioEmbolicStroke | g_Anaerotruncus   | MR Egger                  | 9 | 0.0501  | 0.3986 | 0.9036 | -0.0156 | 0.1017 | 0.8821 | 16.0373 | 0.0248 | 488.3149 |
| CardioEmbolicStroke | g_Anaerotruncus   | Weighted median           | 9 | -0.0385 | 0.0560 | 0.4922 | -0.0156 | 0.1017 | 0.8821 | 16.0373 | 0.0248 | 488.3149 |
| CardioEmbolicStroke | g_Anaerotruncus   | Inverse variance weighted | 9 | -0.0105 | 0.0571 | 0.8536 | -0.0156 | 0.1017 | 0.8821 | 16.0373 | 0.0248 | 488.3149 |
| CardioEmbolicStroke | g_Anaerotruncus   | Simple mode               | 9 | -0.0319 | 0.0835 | 0.7118 | -0.0156 | 0.1017 | 0.8821 | 16.0373 | 0.0248 | 488.3149 |
| CardioEmbolicStroke | g_Anaerotruncus   | Weighted mode             | 9 | -0.0295 | 0.0674 | 0.6729 | -0.0156 | 0.1017 | 0.8821 | 16.0373 | 0.0248 | 488.3149 |
| CardioEmbolicStroke | g_Atopobium       | MR Egger                  | 9 | 0.0996  | 0.3136 | 0.7602 | -0.0211 | 0.0800 | 0.7994 | 4.2323  | 0.7527 | 621.9220 |
| CardioEmbolicStroke | g_Atopobium       | Weighted median           | 9 | -0.0003 | 0.0617 | 0.9962 | -0.0211 | 0.0800 | 0.7994 | 4.2323  | 0.7527 | 621.9220 |
| CardioEmbolicStroke | g_Atopobium       | Inverse variance weighted | 9 | 0.0177  | 0.0479 | 0.7115 | -0.0211 | 0.0800 | 0.7994 | 4.2323  | 0.7527 | 621.9220 |
| CardioEmbolicStroke | g_Atopobium       | Simple mode               | 9 | -0.0039 | 0.0968 | 0.9689 | -0.0211 | 0.0800 | 0.7994 | 4.2323  | 0.7527 | 621.9220 |
| CardioEmbolicStroke | g_Atopobium       | Weighted mode             | 9 | -0.0018 | 0.0921 | 0.9850 | -0.0211 | 0.0800 | 0.7994 | 4.2323  | 0.7527 | 621.9220 |
| CardioEmbolicStroke | g_Bacteroides     | MR Egger                  | 9 | 0.1802  | 0.3350 | 0.6072 | -0.0332 | 0.0855 | 0.7093 | 11.1122 | 0.1338 | 375.7368 |
| CardioEmbolicStroke | g_Bacteroides     | Weighted median           | 9 | 0.0274  | 0.0543 | 0.6132 | -0.0332 | 0.0855 | 0.7093 | 11.1122 | 0.1338 | 375.7368 |
| CardioEmbolicStroke | g_Bacteroides     | Inverse variance weighted | 9 | 0.0517  | 0.0484 | 0.2861 | -0.0332 | 0.0855 | 0.7093 | 11.1122 | 0.1338 | 375.7368 |

|                     |                    |                           |   |         |        |        |         |        |        |         |        |          |
|---------------------|--------------------|---------------------------|---|---------|--------|--------|---------|--------|--------|---------|--------|----------|
| CardioEmbolicStroke | g_Bacteroides      | Simple mode               | 9 | 0.0414  | 0.0958 | 0.6769 | -0.0332 | 0.0855 | 0.7093 | 11.1122 | 0.1338 | 375.7368 |
| CardioEmbolicStroke | g_Bacteroides      | Weighted mode             | 9 | 0.0155  | 0.0835 | 0.8574 | -0.0332 | 0.0855 | 0.7093 | 11.1122 | 0.1338 | 375.7368 |
| CardioEmbolicStroke | g_Blautia          | MR Egger                  | 9 | 0.3883  | 0.2359 | 0.1438 | -0.0917 | 0.0602 | 0.1716 | 9.5836  | 0.2955 | 492.1396 |
| CardioEmbolicStroke | g_Blautia          | Weighted median           | 9 | 0.0106  | 0.0475 | 0.8228 | -0.0917 | 0.0602 | 0.1716 | 9.5836  | 0.2955 | 492.1396 |
| CardioEmbolicStroke | g_Blautia          | Inverse variance weighted | 9 | 0.0333  | 0.0389 | 0.3929 | -0.0917 | 0.0602 | 0.1716 | 9.5836  | 0.2955 | 492.1396 |
| CardioEmbolicStroke | g_Blautia          | Simple mode               | 9 | -0.0066 | 0.0716 | 0.9286 | -0.0917 | 0.0602 | 0.1716 | 9.5836  | 0.2955 | 492.1396 |
| CardioEmbolicStroke | g_Blautia          | Weighted mode             | 9 | -0.0052 | 0.0668 | 0.9404 | -0.0917 | 0.0602 | 0.1716 | 9.5836  | 0.2955 | 492.1396 |
| CardioEmbolicStroke | g_Citrobacter      | MR Egger                  | 9 | 0.1763  | 0.6692 | 0.7999 | -0.0828 | 0.1707 | 0.6423 | 3.9958  | 0.7803 | 238.5551 |
| CardioEmbolicStroke | g_Citrobacter      | Weighted median           | 9 | -0.2407 | 0.1318 | 0.0678 | -0.0828 | 0.1707 | 0.6423 | 3.9958  | 0.7803 | 238.5551 |
| CardioEmbolicStroke | g_Citrobacter      | Inverse variance weighted | 9 | -0.1447 | 0.1023 | 0.1572 | -0.0828 | 0.1707 | 0.6423 | 3.9958  | 0.7803 | 238.5551 |
| CardioEmbolicStroke | g_Citrobacter      | Simple mode               | 9 | -0.2673 | 0.2190 | 0.2569 | -0.0828 | 0.1707 | 0.6423 | 3.9958  | 0.7803 | 238.5551 |
| CardioEmbolicStroke | g_Citrobacter      | Weighted mode             | 9 | -0.2673 | 0.2035 | 0.2255 | -0.0828 | 0.1707 | 0.6423 | 3.9958  | 0.7803 | 238.5551 |
| CardioEmbolicStroke | g_Clostridium      | MR Egger                  | 9 | 0.2590  | 0.2291 | 0.2955 | -0.0540 | 0.0585 | 0.3863 | 6.6934  | 0.4615 | 614.3387 |
| CardioEmbolicStroke | g_Clostridium      | Weighted median           | 9 | 0.0578  | 0.0470 | 0.2195 | -0.0540 | 0.0585 | 0.3863 | 6.6934  | 0.4615 | 614.3387 |
| CardioEmbolicStroke | g_Clostridium      | Inverse variance weighted | 9 | 0.0498  | 0.0350 | 0.1552 | -0.0540 | 0.0585 | 0.3863 | 6.6934  | 0.4615 | 614.3387 |
| CardioEmbolicStroke | g_Clostridium      | Simple mode               | 9 | 0.0716  | 0.0719 | 0.3489 | -0.0540 | 0.0585 | 0.3863 | 6.6934  | 0.4615 | 614.3387 |
| CardioEmbolicStroke | g_Clostridium      | Weighted mode             | 9 | 0.0543  | 0.0672 | 0.4423 | -0.0540 | 0.0585 | 0.3863 | 6.6934  | 0.4615 | 614.3387 |
| CardioEmbolicStroke | g_Collinsella      | MR Egger                  | 9 | -0.4248 | 0.7227 | 0.5751 | 0.1123  | 0.1844 | 0.5618 | 5.3253  | 0.6203 | 238.6836 |
| CardioEmbolicStroke | g_Collinsella      | Weighted median           | 9 | -0.0579 | 0.1463 | 0.6922 | 0.1123  | 0.1844 | 0.5618 | 5.3253  | 0.6203 | 238.6836 |
| CardioEmbolicStroke | g_Collinsella      | Inverse variance weighted | 9 | 0.0101  | 0.1104 | 0.9271 | 0.1123  | 0.1844 | 0.5618 | 5.3253  | 0.6203 | 238.6836 |
| CardioEmbolicStroke | g_Collinsella      | Simple mode               | 9 | -0.0536 | 0.2012 | 0.7966 | 0.1123  | 0.1844 | 0.5618 | 5.3253  | 0.6203 | 238.6836 |
| CardioEmbolicStroke | g_Collinsella      | Weighted mode             | 9 | -0.0581 | 0.1777 | 0.7522 | 0.1123  | 0.1844 | 0.5618 | 5.3253  | 0.6203 | 238.6836 |
| CardioEmbolicStroke | g_Coprobacillus    | MR Egger                  | 9 | 0.1490  | 0.3600 | 0.6914 | -0.0268 | 0.0918 | 0.7791 | 2.7311  | 0.9087 | 759.1309 |
| CardioEmbolicStroke | g_Coprobacillus    | Weighted median           | 9 | 0.0082  | 0.0687 | 0.9047 | -0.0268 | 0.0918 | 0.7791 | 2.7311  | 0.9087 | 759.1309 |
| CardioEmbolicStroke | g_Coprobacillus    | Inverse variance weighted | 9 | 0.0453  | 0.0550 | 0.4104 | -0.0268 | 0.0918 | 0.7791 | 2.7311  | 0.9087 | 759.1309 |
| CardioEmbolicStroke | g_Coprobacillus    | Simple mode               | 9 | -0.0157 | 0.1015 | 0.8806 | -0.0268 | 0.0918 | 0.7791 | 2.7311  | 0.9087 | 759.1309 |
| CardioEmbolicStroke | g_Coprobacillus    | Weighted mode             | 9 | -0.0061 | 0.0928 | 0.9492 | -0.0268 | 0.0918 | 0.7791 | 2.7311  | 0.9087 | 759.1309 |
| CardioEmbolicStroke | g_Coprococcus      | MR Egger                  | 9 | 0.5964  | 0.3561 | 0.1379 | -0.1536 | 0.0908 | 0.1346 | 12.2137 | 0.1419 | 426.9724 |
| CardioEmbolicStroke | g_Coprococcus      | Weighted median           | 9 | 0.0737  | 0.0642 | 0.2505 | -0.1536 | 0.0908 | 0.1346 | 12.2137 | 0.1419 | 426.9724 |
| CardioEmbolicStroke | g_Coprococcus      | Inverse variance weighted | 9 | 0.0012  | 0.0604 | 0.9838 | -0.1536 | 0.0908 | 0.1346 | 12.2137 | 0.1419 | 426.9724 |
| CardioEmbolicStroke | g_Coprococcus      | Simple mode               | 9 | 0.0855  | 0.0821 | 0.3281 | -0.1536 | 0.0908 | 0.1346 | 12.2137 | 0.1419 | 426.9724 |
| CardioEmbolicStroke | g_Coprococcus      | Weighted mode             | 9 | 0.0871  | 0.0760 | 0.2849 | -0.1536 | 0.0908 | 0.1346 | 12.2137 | 0.1419 | 426.9724 |
| CardioEmbolicStroke | g_Desulfovibrio    | MR Egger                  | 9 | 0.2753  | 0.8190 | 0.7466 | -0.0870 | 0.2089 | 0.6898 | 3.7976  | 0.8028 | 236.2853 |
| CardioEmbolicStroke | g_Desulfovibrio    | Weighted median           | 9 | -0.1122 | 0.1620 | 0.4885 | -0.0870 | 0.2089 | 0.6898 | 3.7976  | 0.8028 | 236.2853 |
| CardioEmbolicStroke | g_Desulfovibrio    | Inverse variance weighted | 9 | -0.0615 | 0.1252 | 0.6231 | -0.0870 | 0.2089 | 0.6898 | 3.7976  | 0.8028 | 236.2853 |
| CardioEmbolicStroke | g_Desulfovibrio    | Simple mode               | 9 | -0.1850 | 0.2354 | 0.4544 | -0.0870 | 0.2089 | 0.6898 | 3.7976  | 0.8028 | 236.2853 |
| CardioEmbolicStroke | g_Desulfovibrio    | Weighted mode             | 9 | -0.1611 | 0.2306 | 0.5045 | -0.0870 | 0.2089 | 0.6898 | 3.7976  | 0.8028 | 236.2853 |
| CardioEmbolicStroke | g_Dorea            | MR Egger                  | 9 | 0.4300  | 0.2728 | 0.1590 | -0.1130 | 0.0696 | 0.1484 | 9.3930  | 0.3102 | 613.1918 |
| CardioEmbolicStroke | g_Dorea            | Weighted median           | 9 | 0.0096  | 0.0567 | 0.8662 | -0.1130 | 0.0696 | 0.1484 | 9.3930  | 0.3102 | 613.1918 |
| CardioEmbolicStroke | g_Dorea            | Inverse variance weighted | 9 | -0.0079 | 0.0452 | 0.8608 | -0.1130 | 0.0696 | 0.1484 | 9.3930  | 0.3102 | 613.1918 |
| CardioEmbolicStroke | g_Dorea            | Simple mode               | 9 | 0.0599  | 0.0940 | 0.5421 | -0.1130 | 0.0696 | 0.1484 | 9.3930  | 0.3102 | 613.1918 |
| CardioEmbolicStroke | g_Dorea            | Weighted mode             | 9 | 0.0742  | 0.0878 | 0.4227 | -0.1130 | 0.0696 | 0.1484 | 9.3930  | 0.3102 | 613.1918 |
| CardioEmbolicStroke | g_Enterobacter     | MR Egger                  | 9 | 0.1223  | 0.7377 | 0.8730 | -0.0594 | 0.1882 | 0.7617 | 6.6985  | 0.4609 | 154.3040 |
| CardioEmbolicStroke | g_Enterobacter     | Weighted median           | 9 | -0.1626 | 0.1514 | 0.2828 | -0.0594 | 0.1882 | 0.7617 | 6.6985  | 0.4609 | 154.3040 |
| CardioEmbolicStroke | g_Enterobacter     | Inverse variance weighted | 9 | -0.1076 | 0.1127 | 0.3398 | -0.0594 | 0.1882 | 0.7617 | 6.6985  | 0.4609 | 154.3040 |
| CardioEmbolicStroke | g_Enterobacter     | Simple mode               | 9 | -0.1935 | 0.2591 | 0.4765 | -0.0594 | 0.1882 | 0.7617 | 6.6985  | 0.4609 | 154.3040 |
| CardioEmbolicStroke | g_Enterobacter     | Weighted mode             | 9 | -0.1879 | 0.2320 | 0.4414 | -0.0594 | 0.1882 | 0.7617 | 6.6985  | 0.4609 | 154.3040 |
| CardioEmbolicStroke | g_Escherichia      | MR Egger                  | 9 | 0.1787  | 0.5665 | 0.7616 | -0.0641 | 0.1445 | 0.6708 | 5.7420  | 0.5702 | 255.6571 |
| CardioEmbolicStroke | g_Escherichia      | Weighted median           | 9 | -0.0795 | 0.1137 | 0.4846 | -0.0641 | 0.1445 | 0.6708 | 5.7420  | 0.5702 | 255.6571 |
| CardioEmbolicStroke | g_Escherichia      | Inverse variance weighted | 9 | -0.0695 | 0.0866 | 0.4221 | -0.0641 | 0.1445 | 0.6708 | 5.7420  | 0.5702 | 255.6571 |
| CardioEmbolicStroke | g_Escherichia      | Simple mode               | 9 | -0.0227 | 0.1790 | 0.9021 | -0.0641 | 0.1445 | 0.6708 | 5.7420  | 0.5702 | 255.6571 |
| CardioEmbolicStroke | g_Escherichia      | Weighted mode             | 9 | -0.0711 | 0.1758 | 0.6966 | -0.0641 | 0.1445 | 0.6708 | 5.7420  | 0.5702 | 255.6571 |
| CardioEmbolicStroke | g_Faecalibacterium | MR Egger                  | 9 | 1.0081  | 0.4561 | 0.0628 | -0.2515 | 0.1163 | 0.0675 | 13.8372 | 0.0861 | 252.0743 |
| CardioEmbolicStroke | g_Faecalibacterium | Weighted median           | 9 | 0.1352  | 0.0925 | 0.1437 | -0.2515 | 0.1163 | 0.0675 | 13.8372 | 0.0861 | 252.0743 |
| CardioEmbolicStroke | g_Faecalibacterium | Inverse variance weighted | 9 | 0.0339  | 0.0842 | 0.6876 | -0.2515 | 0.1163 | 0.0675 | 13.8372 | 0.0861 | 252.0743 |
| CardioEmbolicStroke | g_Faecalibacterium | Simple mode               | 9 | 0.1680  | 0.1558 | 0.3123 | -0.2515 | 0.1163 | 0.0675 | 13.8372 | 0.0861 | 252.0743 |
| CardioEmbolicStroke | g_Faecalibacterium | Weighted mode             | 9 | 0.1680  | 0.1266 | 0.2211 | -0.2515 | 0.1163 | 0.0675 | 13.8372 | 0.0861 | 252.0743 |
| CardioEmbolicStroke | g_Fusobacterium    | MR Egger                  | 9 | -0.6823 | 1.1829 | 0.5821 | 0.2390  | 0.3017 | 0.4543 | 11.5576 | 0.1161 | 43.0453  |
| CardioEmbolicStroke | g_Fusobacterium    | Weighted median           | 9 | 0.2243  | 0.2145 | 0.2957 | 0.2390  | 0.3017 | 0.4543 | 11.5576 | 0.1161 | 43.0453  |
| CardioEmbolicStroke | g_Fusobacterium    | Inverse variance weighted | 9 | 0.2436  | 0.1765 | 0.1676 | 0.2390  | 0.3017 | 0.4543 | 11.5576 | 0.1161 | 43.0453  |
| CardioEmbolicStroke | g_Fusobacterium    | Simple mode               | 9 | 0.0569  | 0.3733 | 0.8826 | 0.2390  | 0.3017 | 0.4543 | 11.5576 | 0.1161 | 43.0453  |

|                     |                  |                           |   |         |        |        |         |        |        |         |        |          |
|---------------------|------------------|---------------------------|---|---------|--------|--------|---------|--------|--------|---------|--------|----------|
| CardioEmbolicStroke | g_Fusobacterium  | Weighted mode             | 9 | 0.1041  | 0.3330 | 0.7626 | 0.2390  | 0.3017 | 0.4543 | 11.5576 | 0.1161 | 43.0453  |
| CardioEmbolicStroke | g_Gemella        | MR Egger                  | 9 | 0.0939  | 0.4223 | 0.8303 | -0.0268 | 0.1077 | 0.8110 | 9.1342  | 0.2432 | 457.5318 |
| CardioEmbolicStroke | g_Gemella        | Weighted median           | 9 | 0.0073  | 0.0803 | 0.9277 | -0.0268 | 0.1077 | 0.8110 | 9.1342  | 0.2432 | 457.5318 |
| CardioEmbolicStroke | g_Gemella        | Inverse variance weighted | 9 | -0.0097 | 0.0606 | 0.8728 | -0.0268 | 0.1077 | 0.8110 | 9.1342  | 0.2432 | 457.5318 |
| CardioEmbolicStroke | g_Gemella        | Simple mode               | 9 | 0.0322  | 0.1414 | 0.8254 | -0.0268 | 0.1077 | 0.8110 | 9.1342  | 0.2432 | 457.5318 |
| CardioEmbolicStroke | g_Gemella        | Weighted mode             | 9 | 0.0588  | 0.1419 | 0.6894 | -0.0268 | 0.1077 | 0.8110 | 9.1342  | 0.2432 | 457.5318 |
| CardioEmbolicStroke | g_Granulicatella | MR Egger                  | 9 | 0.3635  | 0.3286 | 0.3052 | -0.1019 | 0.0838 | 0.2635 | 8.6738  | 0.3706 | 565.2502 |
| CardioEmbolicStroke | g_Granulicatella | Weighted median           | 9 | -0.0152 | 0.0687 | 0.8249 | -0.1019 | 0.0838 | 0.2635 | 8.6738  | 0.3706 | 565.2502 |
| CardioEmbolicStroke | g_Granulicatella | Inverse variance weighted | 9 | -0.0312 | 0.0517 | 0.5456 | -0.1019 | 0.0838 | 0.2635 | 8.6738  | 0.3706 | 565.2502 |
| CardioEmbolicStroke | g_Granulicatella | Simple mode               | 9 | -0.0146 | 0.1126 | 0.9003 | -0.1019 | 0.0838 | 0.2635 | 8.6738  | 0.3706 | 565.2502 |
| CardioEmbolicStroke | g_Granulicatella | Weighted mode             | 9 | -0.0199 | 0.1064 | 0.8565 | -0.1019 | 0.0838 | 0.2635 | 8.6738  | 0.3706 | 565.2502 |
| CardioEmbolicStroke | g_Holdemania     | MR Egger                  | 9 | 0.0626  | 0.3226 | 0.8516 | -0.0162 | 0.0823 | 0.8496 | 9.1390  | 0.2428 | 575.2654 |
| CardioEmbolicStroke | g_Holdemania     | Weighted median           | 9 | -0.0253 | 0.0603 | 0.6755 | -0.0162 | 0.0823 | 0.8496 | 9.1390  | 0.2428 | 575.2654 |
| CardioEmbolicStroke | g_Holdemania     | Inverse variance weighted | 9 | -0.0001 | 0.0462 | 0.9976 | -0.0162 | 0.0823 | 0.8496 | 9.1390  | 0.2428 | 575.2654 |
| CardioEmbolicStroke | g_Holdemania     | Simple mode               | 9 | -0.0795 | 0.1063 | 0.4763 | -0.0162 | 0.0823 | 0.8496 | 9.1390  | 0.2428 | 575.2654 |
| CardioEmbolicStroke | g_Holdemania     | Weighted mode             | 9 | -0.0863 | 0.0945 | 0.3877 | -0.0162 | 0.0823 | 0.8496 | 9.1390  | 0.2428 | 575.2654 |
| CardioEmbolicStroke | g_Klebsiella     | MR Egger                  | 9 | -0.0782 | 0.8119 | 0.9259 | -0.0473 | 0.2071 | 0.8260 | 7.7241  | 0.3575 | 58.7768  |
| CardioEmbolicStroke | g_Klebsiella     | Weighted median           | 9 | -0.1260 | 0.1651 | 0.4451 | -0.0473 | 0.2071 | 0.8260 | 7.7241  | 0.3575 | 58.7768  |
| CardioEmbolicStroke | g_Klebsiella     | Inverse variance weighted | 9 | -0.2614 | 0.1182 | 0.0270 | -0.0473 | 0.2071 | 0.8260 | 7.7241  | 0.3575 | 58.7768  |
| CardioEmbolicStroke | g_Klebsiella     | Simple mode               | 9 | -0.0043 | 0.2530 | 0.9868 | -0.0473 | 0.2071 | 0.8260 | 7.7241  | 0.3575 | 58.7768  |
| CardioEmbolicStroke | g_Klebsiella     | Weighted mode             | 9 | -0.0219 | 0.2230 | 0.9242 | -0.0473 | 0.2071 | 0.8260 | 7.7241  | 0.3575 | 58.7768  |
| CardioEmbolicStroke | g_Lactococcus    | MR Egger                  | 9 | -0.1763 | 0.4609 | 0.7134 | 0.0396  | 0.1176 | 0.7462 | 5.4417  | 0.6062 | 455.4836 |
| CardioEmbolicStroke | g_Lactococcus    | Weighted median           | 9 | -0.0041 | 0.0890 | 0.9630 | 0.0396  | 0.1176 | 0.7462 | 5.4417  | 0.6062 | 455.4836 |
| CardioEmbolicStroke | g_Lactococcus    | Inverse variance weighted | 9 | -0.0230 | 0.0704 | 0.7445 | 0.0396  | 0.1176 | 0.7462 | 5.4417  | 0.6062 | 455.4836 |
| CardioEmbolicStroke | g_Lactococcus    | Simple mode               | 9 | -0.0125 | 0.1295 | 0.9255 | 0.0396  | 0.1176 | 0.7462 | 5.4417  | 0.6062 | 455.4836 |
| CardioEmbolicStroke | g_Lactococcus    | Weighted mode             | 9 | -0.0235 | 0.1301 | 0.8612 | 0.0396  | 0.1176 | 0.7462 | 5.4417  | 0.6062 | 455.4836 |
| CardioEmbolicStroke | g_Megasphaera    | MR Egger                  | 9 | -0.7384 | 0.5575 | 0.2269 | 0.1750  | 0.1422 | 0.2582 | 6.6705  | 0.5726 | 292.0419 |
| CardioEmbolicStroke | g_Megasphaera    | Weighted median           | 9 | -0.1058 | 0.1149 | 0.3573 | 0.1750  | 0.1422 | 0.2582 | 6.6705  | 0.5726 | 292.0419 |
| CardioEmbolicStroke | g_Megasphaera    | Inverse variance weighted | 9 | -0.0605 | 0.0852 | 0.4778 | 0.1750  | 0.1422 | 0.2582 | 6.6705  | 0.5726 | 292.0419 |
| CardioEmbolicStroke | g_Megasphaera    | Simple mode               | 9 | -0.1110 | 0.1848 | 0.5645 | 0.1750  | 0.1422 | 0.2582 | 6.6705  | 0.5726 | 292.0419 |
| CardioEmbolicStroke | g_Megasphaera    | Weighted mode             | 9 | -0.1764 | 0.1762 | 0.3462 | 0.1750  | 0.1422 | 0.2582 | 6.6705  | 0.5726 | 292.0419 |
| CardioEmbolicStroke | g_Mitsuokella    | MR Egger                  | 9 | -0.1837 | 0.5997 | 0.7683 | 0.0250  | 0.1530 | 0.8748 | 5.5455  | 0.5937 | 209.0542 |
| CardioEmbolicStroke | g_Mitsuokella    | Weighted median           | 9 | -0.0809 | 0.1214 | 0.5050 | 0.0250  | 0.1530 | 0.8748 | 5.5455  | 0.5937 | 209.0542 |
| CardioEmbolicStroke | g_Mitsuokella    | Inverse variance weighted | 9 | -0.0869 | 0.0917 | 0.3433 | 0.0250  | 0.1530 | 0.8748 | 5.5455  | 0.5937 | 209.0542 |
| CardioEmbolicStroke | g_Mitsuokella    | Simple mode               | 9 | -0.2493 | 0.1958 | 0.2387 | 0.0250  | 0.1530 | 0.8748 | 5.5455  | 0.5937 | 209.0542 |
| CardioEmbolicStroke | g_Mitsuokella    | Weighted mode             | 9 | 0.1035  | 0.1823 | 0.5858 | 0.0250  | 0.1530 | 0.8748 | 5.5455  | 0.5937 | 209.0542 |
| CardioEmbolicStroke | g_Mobiluncus     | MR Egger                  | 9 | 0.4439  | 0.3767 | 0.2771 | -0.0966 | 0.0961 | 0.3485 | 6.7701  | 0.4532 | 422.9477 |
| CardioEmbolicStroke | g_Mobiluncus     | Weighted median           | 9 | 0.0897  | 0.0793 | 0.2580 | -0.0966 | 0.0961 | 0.3485 | 6.7701  | 0.4532 | 422.9477 |
| CardioEmbolicStroke | g_Mobiluncus     | Inverse variance weighted | 9 | 0.0699  | 0.0576 | 0.2245 | -0.0966 | 0.0961 | 0.3485 | 6.7701  | 0.4532 | 422.9477 |
| CardioEmbolicStroke | g_Mobiluncus     | Simple mode               | 9 | -0.0505 | 0.1361 | 0.7200 | -0.0966 | 0.0961 | 0.3485 | 6.7701  | 0.4532 | 422.9477 |
| CardioEmbolicStroke | g_Mobiluncus     | Weighted mode             | 9 | 0.1576  | 0.1174 | 0.2164 | -0.0966 | 0.0961 | 0.3485 | 6.7701  | 0.4532 | 422.9477 |
| CardioEmbolicStroke | g_Odoribacter    | MR Egger                  | 9 | 0.4004  | 0.4476 | 0.4007 | -0.1120 | 0.1142 | 0.3594 | 7.5942  | 0.3697 | 353.3735 |
| CardioEmbolicStroke | g_Odoribacter    | Weighted median           | 9 | 0.0054  | 0.0926 | 0.9534 | -0.1120 | 0.1142 | 0.3594 | 7.5942  | 0.3697 | 353.3735 |
| CardioEmbolicStroke | g_Odoribacter    | Inverse variance weighted | 9 | -0.0334 | 0.0682 | 0.6243 | -0.1120 | 0.1142 | 0.3594 | 7.5942  | 0.3697 | 353.3735 |
| CardioEmbolicStroke | g_Odoribacter    | Simple mode               | 9 | 0.0200  | 0.1541 | 0.8999 | -0.1120 | 0.1142 | 0.3594 | 7.5942  | 0.3697 | 353.3735 |
| CardioEmbolicStroke | g_Odoribacter    | Weighted mode             | 9 | 0.0266  | 0.1583 | 0.8706 | -0.1120 | 0.1142 | 0.3594 | 7.5942  | 0.3697 | 353.3735 |
| CardioEmbolicStroke | g_Oribacterium   | MR Egger                  | 9 | 0.7963  | 0.2707 | 0.0217 | -0.2037 | 0.0691 | 0.0214 | 12.5824 | 0.1270 | 501.6859 |
| CardioEmbolicStroke | g_Oribacterium   | Weighted median           | 9 | 0.0042  | 0.0599 | 0.9441 | -0.2037 | 0.0691 | 0.0214 | 12.5824 | 0.1270 | 501.6859 |
| CardioEmbolicStroke | g_Oribacterium   | Inverse variance weighted | 9 | 0.0074  | 0.0519 | 0.8870 | -0.2037 | 0.0691 | 0.0214 | 12.5824 | 0.1270 | 501.6859 |
| CardioEmbolicStroke | g_Oribacterium   | Simple mode               | 9 | -0.0444 | 0.1047 | 0.6826 | -0.2037 | 0.0691 | 0.0214 | 12.5824 | 0.1270 | 501.6859 |
| CardioEmbolicStroke | g_Oribacterium   | Weighted mode             | 9 | -0.0144 | 0.1018 | 0.8908 | -0.2037 | 0.0691 | 0.0214 | 12.5824 | 0.1270 | 501.6859 |
| CardioEmbolicStroke | g_Oscillibacter  | MR Egger                  | 9 | 0.3287  | 0.5553 | 0.5725 | -0.1030 | 0.1416 | 0.4908 | 10.0388 | 0.1864 | 257.6189 |
| CardioEmbolicStroke | g_Oscillibacter  | Weighted median           | 9 | -0.0484 | 0.0976 | 0.6197 | -0.1030 | 0.1416 | 0.4908 | 10.0388 | 0.1864 | 257.6189 |
| CardioEmbolicStroke | g_Oscillibacter  | Inverse variance weighted | 9 | -0.0702 | 0.0823 | 0.3936 | -0.1030 | 0.1416 | 0.4908 | 10.0388 | 0.1864 | 257.6189 |
| CardioEmbolicStroke | g_Oscillibacter  | Simple mode               | 9 | -0.0573 | 0.1495 | 0.7113 | -0.1030 | 0.1416 | 0.4908 | 10.0388 | 0.1864 | 257.6189 |
| CardioEmbolicStroke | g_Oscillibacter  | Weighted mode             | 9 | -0.0486 | 0.1306 | 0.7196 | -0.1030 | 0.1416 | 0.4908 | 10.0388 | 0.1864 | 257.6189 |
| CardioEmbolicStroke | g_Oxalobacter    | MR Egger                  | 9 | 0.1020  | 0.8336 | 0.9060 | -0.0384 | 0.2127 | 0.8619 | 10.0819 | 0.1840 | 140.0633 |
| CardioEmbolicStroke | g_Oxalobacter    | Weighted median           | 9 | -0.1457 | 0.1452 | 0.3159 | -0.0384 | 0.2127 | 0.8619 | 10.0819 | 0.1840 | 140.0633 |
| CardioEmbolicStroke | g_Oxalobacter    | Inverse variance weighted | 9 | -0.0467 | 0.1194 | 0.6961 | -0.0384 | 0.2127 | 0.8619 | 10.0819 | 0.1840 | 140.0633 |
| CardioEmbolicStroke | g_Oxalobacter    | Simple mode               | 9 | -0.1418 | 0.2178 | 0.5332 | -0.0384 | 0.2127 | 0.8619 | 10.0819 | 0.1840 | 140.0633 |
| CardioEmbolicStroke | g_Oxalobacter    | Weighted mode             | 9 | -0.1195 | 0.2134 | 0.5907 | -0.0384 | 0.2127 | 0.8619 | 10.0819 | 0.1840 | 140.0633 |

|                     |                        |                           |   |         |        |        |         |        |        |         |        |          |
|---------------------|------------------------|---------------------------|---|---------|--------|--------|---------|--------|--------|---------|--------|----------|
| CardioEmbolicStroke | g_Parabacteroides      | MR Egger                  | 9 | 0.2041  | 0.2706 | 0.4753 | -0.0707 | 0.0690 | 0.3399 | 8.9513  | 0.3464 | 582.0992 |
| CardioEmbolicStroke | g_Parabacteroides      | Weighted median           | 9 | -0.1029 | 0.0529 | 0.0520 | -0.0707 | 0.0690 | 0.3399 | 8.9513  | 0.3464 | 582.0992 |
| CardioEmbolicStroke | g_Parabacteroides      | Inverse variance weighted | 9 | -0.0697 | 0.0415 | 0.0927 | -0.0707 | 0.0690 | 0.3399 | 8.9513  | 0.3464 | 582.0992 |
| CardioEmbolicStroke | g_Parabacteroides      | Simple mode               | 9 | -0.1351 | 0.0892 | 0.1684 | -0.0707 | 0.0690 | 0.3399 | 8.9513  | 0.3464 | 582.0992 |
| CardioEmbolicStroke | g_Parabacteroides      | Weighted mode             | 9 | -0.1120 | 0.0810 | 0.2041 | -0.0707 | 0.0690 | 0.3399 | 8.9513  | 0.3464 | 582.0992 |
| CardioEmbolicStroke | g_Paraprevotella       | MR Egger                  | 9 | -0.2147 | 0.4094 | 0.6162 | 0.0182  | 0.1044 | 0.8664 | 4.9586  | 0.6650 | 292.9644 |
| CardioEmbolicStroke | g_Paraprevotella       | Weighted median           | 9 | -0.1074 | 0.0785 | 0.1713 | 0.0182  | 0.1044 | 0.8664 | 4.9586  | 0.6650 | 292.9644 |
| CardioEmbolicStroke | g_Paraprevotella       | Inverse variance weighted | 9 | -0.1441 | 0.0626 | 0.0213 | 0.0182  | 0.1044 | 0.8664 | 4.9586  | 0.6650 | 292.9644 |
| CardioEmbolicStroke | g_Paraprevotella       | Simple mode               | 9 | -0.0475 | 0.1483 | 0.7572 | 0.0182  | 0.1044 | 0.8664 | 4.9586  | 0.6650 | 292.9644 |
| CardioEmbolicStroke | g_Paraprevotella       | Weighted mode             | 9 | -0.0315 | 0.1335 | 0.8194 | 0.0182  | 0.1044 | 0.8664 | 4.9586  | 0.6650 | 292.9644 |
| CardioEmbolicStroke | g_Parasutterella       | MR Egger                  | 9 | 0.9736  | 0.9153 | 0.3228 | -0.2435 | 0.2335 | 0.3317 | 7.5280  | 0.4809 | 103.5201 |
| CardioEmbolicStroke | g_Parasutterella       | Weighted median           | 9 | 0.1179  | 0.1847 | 0.5234 | -0.2435 | 0.2335 | 0.3317 | 7.5280  | 0.4809 | 103.5201 |
| CardioEmbolicStroke | g_Parasutterella       | Inverse variance weighted | 9 | 0.0304  | 0.1399 | 0.8277 | -0.2435 | 0.2335 | 0.3317 | 7.5280  | 0.4809 | 103.5201 |
| CardioEmbolicStroke | g_Parasutterella       | Simple mode               | 9 | 0.1855  | 0.2849 | 0.5333 | -0.2435 | 0.2335 | 0.3317 | 7.5280  | 0.4809 | 103.5201 |
| CardioEmbolicStroke | g_Parasutterella       | Weighted mode             | 9 | 0.1745  | 0.2718 | 0.5389 | -0.2435 | 0.2335 | 0.3317 | 7.5280  | 0.4809 | 103.5201 |
| CardioEmbolicStroke | g_Peptoniphilus        | MR Egger                  | 9 | 0.4196  | 0.5664 | 0.4829 | -0.1013 | 0.1445 | 0.5059 | 8.8742  | 0.2618 | 159.3429 |
| CardioEmbolicStroke | g_Peptoniphilus        | Weighted median           | 9 | -0.0056 | 0.1083 | 0.9588 | -0.1013 | 0.1445 | 0.5059 | 8.8742  | 0.2618 | 159.3429 |
| CardioEmbolicStroke | g_Peptoniphilus        | Inverse variance weighted | 9 | 0.0272  | 0.0838 | 0.7453 | -0.1013 | 0.1445 | 0.5059 | 8.8742  | 0.2618 | 159.3429 |
| CardioEmbolicStroke | g_Peptoniphilus        | Simple mode               | 9 | 0.0062  | 0.1684 | 0.9716 | -0.1013 | 0.1445 | 0.5059 | 8.8742  | 0.2618 | 159.3429 |
| CardioEmbolicStroke | g_Peptoniphilus        | Weighted mode             | 9 | -0.0098 | 0.1456 | 0.9482 | -0.1013 | 0.1445 | 0.5059 | 8.8742  | 0.2618 | 159.3429 |
| CardioEmbolicStroke | g_Phascolartobacterium | MR Egger                  | 9 | -0.0627 | 0.5532 | 0.9129 | 0.0358  | 0.1411 | 0.8072 | 5.0756  | 0.6507 | 300.8379 |
| CardioEmbolicStroke | g_Phascolartobacterium | Weighted median           | 9 | 0.1102  | 0.1135 | 0.3318 | 0.0358  | 0.1411 | 0.8072 | 5.0756  | 0.6507 | 300.8379 |
| CardioEmbolicStroke | g_Phascolartobacterium | Inverse variance weighted | 9 | 0.0759  | 0.0845 | 0.3695 | 0.0358  | 0.1411 | 0.8072 | 5.0756  | 0.6507 | 300.8379 |
| CardioEmbolicStroke | g_Phascolartobacterium | Simple mode               | 9 | 0.1334  | 0.1695 | 0.4540 | 0.0358  | 0.1411 | 0.8072 | 5.0756  | 0.6507 | 300.8379 |
| CardioEmbolicStroke | g_Phascolartobacterium | Weighted mode             | 9 | 0.1334  | 0.1769 | 0.4724 | 0.0358  | 0.1411 | 0.8072 | 5.0756  | 0.6507 | 300.8379 |
| CardioEmbolicStroke | g_Porphyromonas        | MR Egger                  | 9 | -0.0787 | 0.7155 | 0.9155 | 0.0183  | 0.1825 | 0.9231 | 9.1495  | 0.2421 | 180.3426 |
| CardioEmbolicStroke | g_Porphyromonas        | Weighted median           | 9 | 0.0396  | 0.1276 | 0.7566 | 0.0183  | 0.1825 | 0.9231 | 9.1495  | 0.2421 | 180.3426 |
| CardioEmbolicStroke | g_Porphyromonas        | Inverse variance weighted | 9 | -0.0080 | 0.1024 | 0.9380 | 0.0183  | 0.1825 | 0.9231 | 9.1495  | 0.2421 | 180.3426 |
| CardioEmbolicStroke | g_Porphyromonas        | Simple mode               | 9 | 0.1652  | 0.2280 | 0.4892 | 0.0183  | 0.1825 | 0.9231 | 9.1495  | 0.2421 | 180.3426 |
| CardioEmbolicStroke | g_Porphyromonas        | Weighted mode             | 9 | 0.1026  | 0.2009 | 0.6233 | 0.0183  | 0.1825 | 0.9231 | 9.1495  | 0.2421 | 180.3426 |
| CardioEmbolicStroke | g_Providencia          | MR Egger                  | 9 | -0.1457 | 0.6106 | 0.8182 | 0.0020  | 0.1558 | 0.9902 | 3.6454  | 0.8196 | 282.2216 |
| CardioEmbolicStroke | g_Providencia          | Weighted median           | 9 | -0.1799 | 0.1225 | 0.1417 | 0.0020  | 0.1558 | 0.9902 | 3.6454  | 0.8196 | 282.2216 |
| CardioEmbolicStroke | g_Providencia          | Inverse variance weighted | 9 | -0.1381 | 0.0933 | 0.1390 | 0.0020  | 0.1558 | 0.9902 | 3.6454  | 0.8196 | 282.2216 |
| CardioEmbolicStroke | g_Providencia          | Simple mode               | 9 | -0.2213 | 0.1836 | 0.2625 | 0.0020  | 0.1558 | 0.9902 | 3.6454  | 0.8196 | 282.2216 |
| CardioEmbolicStroke | g_Providencia          | Weighted mode             | 9 | -0.2584 | 0.2035 | 0.2398 | 0.0020  | 0.1558 | 0.9902 | 3.6454  | 0.8196 | 282.2216 |
| CardioEmbolicStroke | g_Pseudoflavonifractor | MR Egger                  | 9 | 0.1035  | 0.2737 | 0.7166 | -0.0286 | 0.0698 | 0.6941 | 8.9990  | 0.2527 | 805.9267 |
| CardioEmbolicStroke | g_Pseudoflavonifractor | Weighted median           | 9 | -0.0314 | 0.0527 | 0.5520 | -0.0286 | 0.0698 | 0.6941 | 8.9990  | 0.2527 | 805.9267 |
| CardioEmbolicStroke | g_Pseudoflavonifractor | Inverse variance weighted | 9 | -0.0074 | 0.0396 | 0.8511 | -0.0286 | 0.0698 | 0.6941 | 8.9990  | 0.2527 | 805.9267 |
| CardioEmbolicStroke | g_Pseudoflavonifractor | Simple mode               | 9 | -0.0878 | 0.0810 | 0.3098 | -0.0286 | 0.0698 | 0.6941 | 8.9990  | 0.2527 | 805.9267 |
| CardioEmbolicStroke | g_Pseudoflavonifractor | Weighted mode             | 9 | -0.0645 | 0.0770 | 0.4266 | -0.0286 | 0.0698 | 0.6941 | 8.9990  | 0.2527 | 805.9267 |
| CardioEmbolicStroke | g_Roseburia            | MR Egger                  | 9 | 0.4098  | 0.4354 | 0.3779 | -0.0972 | 0.1111 | 0.4105 | 10.4788 | 0.1630 | 373.4508 |
| CardioEmbolicStroke | g_Roseburia            | Weighted median           | 9 | -0.0043 | 0.0800 | 0.9576 | -0.0972 | 0.1111 | 0.4105 | 10.4788 | 0.1630 | 373.4508 |
| CardioEmbolicStroke | g_Roseburia            | Inverse variance weighted | 9 | 0.0333  | 0.0656 | 0.6119 | -0.0972 | 0.1111 | 0.4105 | 10.4788 | 0.1630 | 373.4508 |
| CardioEmbolicStroke | g_Roseburia            | Simple mode               | 9 | -0.1418 | 0.1672 | 0.4211 | -0.0972 | 0.1111 | 0.4105 | 10.4788 | 0.1630 | 373.4508 |
| CardioEmbolicStroke | g_Roseburia            | Weighted mode             | 9 | -0.1476 | 0.1773 | 0.4292 | -0.0972 | 0.1111 | 0.4105 | 10.4788 | 0.1630 | 373.4508 |
| CardioEmbolicStroke | g_Ruminococcus         | MR Egger                  | 9 | 0.2570  | 0.3182 | 0.4459 | -0.0742 | 0.0812 | 0.3912 | 7.7060  | 0.3592 | 596.7403 |
| CardioEmbolicStroke | g_Ruminococcus         | Weighted median           | 9 | -0.0702 | 0.0631 | 0.2660 | -0.0742 | 0.0812 | 0.3912 | 7.7060  | 0.3592 | 596.7403 |
| CardioEmbolicStroke | g_Ruminococcus         | Inverse variance weighted | 9 | -0.0304 | 0.0481 | 0.5275 | -0.0742 | 0.0812 | 0.3912 | 7.7060  | 0.3592 | 596.7403 |
| CardioEmbolicStroke | g_Ruminococcus         | Simple mode               | 9 | -0.1315 | 0.1233 | 0.3173 | -0.0742 | 0.0812 | 0.3912 | 7.7060  | 0.3592 | 596.7403 |
| CardioEmbolicStroke | g_Ruminococcus         | Weighted mode             | 9 | -0.1431 | 0.1222 | 0.2752 | -0.0742 | 0.0812 | 0.3912 | 7.7060  | 0.3592 | 596.7403 |
| CardioEmbolicStroke | g_Salmonella           | MR Egger                  | 9 | -0.2974 | 0.5899 | 0.6297 | 0.0312  | 0.1505 | 0.8419 | 5.3795  | 0.6138 | 184.0268 |
| CardioEmbolicStroke | g_Salmonella           | Weighted median           | 9 | -0.1468 | 0.1224 | 0.2305 | 0.0312  | 0.1505 | 0.8419 | 5.3795  | 0.6138 | 184.0268 |
| CardioEmbolicStroke | g_Salmonella           | Inverse variance weighted | 9 | -0.1767 | 0.0902 | 0.0501 | 0.0312  | 0.1505 | 0.8419 | 5.3795  | 0.6138 | 184.0268 |
| CardioEmbolicStroke | g_Salmonella           | Simple mode               | 9 | -0.3131 | 0.2031 | 0.1617 | 0.0312  | 0.1505 | 0.8419 | 5.3795  | 0.6138 | 184.0268 |
| CardioEmbolicStroke | g_Salmonella           | Weighted mode             | 9 | -0.3360 | 0.2127 | 0.1528 | 0.0312  | 0.1505 | 0.8419 | 5.3795  | 0.6138 | 184.0268 |
| CardioEmbolicStroke | g_Shuttleworthia       | MR Egger                  | 9 | -0.1311 | 0.5384 | 0.8145 | 0.0189  | 0.1373 | 0.8944 | 2.0658  | 0.9561 | 559.6145 |
| CardioEmbolicStroke | g_Shuttleworthia       | Weighted median           | 9 | -0.0339 | 0.1044 | 0.7452 | 0.0189  | 0.1373 | 0.8944 | 2.0658  | 0.9561 | 559.6145 |
| CardioEmbolicStroke | g_Shuttleworthia       | Inverse variance weighted | 9 | -0.0579 | 0.0823 | 0.4815 | 0.0189  | 0.1373 | 0.8944 | 2.0658  | 0.9561 | 559.6145 |
| CardioEmbolicStroke | g_Shuttleworthia       | Simple mode               | 9 | -0.0464 | 0.1552 | 0.7724 | 0.0189  | 0.1373 | 0.8944 | 2.0658  | 0.9561 | 559.6145 |
| CardioEmbolicStroke | g_Shuttleworthia       | Weighted mode             | 9 | -0.0370 | 0.1419 | 0.8011 | 0.0189  | 0.1373 | 0.8944 | 2.0658  | 0.9561 | 559.6145 |
| CardioEmbolicStroke | g_Solobacterium        | MR Egger                  | 9 | -0.4933 | 0.4345 | 0.2936 | 0.1334  | 0.1108 | 0.2680 | 5.5151  | 0.7014 | 480.8679 |

|                     |                       |                           |   |         |        |        |         |        |        |         |        |          |
|---------------------|-----------------------|---------------------------|---|---------|--------|--------|---------|--------|--------|---------|--------|----------|
| CardioEmbolicStroke | g_Solobacterium       | Weighted median           | 9 | 0.0085  | 0.0860 | 0.9217 | 0.1334  | 0.1108 | 0.2680 | 5.5151  | 0.7014 | 480.8679 |
| CardioEmbolicStroke | g_Solobacterium       | Inverse variance weighted | 9 | 0.0233  | 0.0664 | 0.7252 | 0.1334  | 0.1108 | 0.2680 | 5.5151  | 0.7014 | 480.8679 |
| CardioEmbolicStroke | g_Solobacterium       | Simple mode               | 9 | -0.0027 | 0.1444 | 0.9853 | 0.1334  | 0.1108 | 0.2680 | 5.5151  | 0.7014 | 480.8679 |
| CardioEmbolicStroke | g_Solobacterium       | Weighted mode             | 9 | -0.0097 | 0.1297 | 0.9424 | 0.1334  | 0.1108 | 0.2680 | 5.5151  | 0.7014 | 480.8679 |
| CardioEmbolicStroke | g_Subdoligranulum     | MR Egger                  | 9 | 0.4776  | 0.5250 | 0.3933 | -0.1475 | 0.1339 | 0.3072 | 20.5290 | 0.0085 | 243.0042 |
| CardioEmbolicStroke | g_Subdoligranulum     | Weighted median           | 9 | -0.1295 | 0.0739 | 0.0795 | -0.1475 | 0.1339 | 0.3072 | 20.5290 | 0.0085 | 243.0042 |
| CardioEmbolicStroke | g_Subdoligranulum     | Inverse variance weighted | 9 | -0.0939 | 0.0813 | 0.2482 | -0.1475 | 0.1339 | 0.3072 | 20.5290 | 0.0085 | 243.0042 |
| CardioEmbolicStroke | g_Subdoligranulum     | Simple mode               | 9 | -0.1653 | 0.1186 | 0.2009 | -0.1475 | 0.1339 | 0.3072 | 20.5290 | 0.0085 | 243.0042 |
| CardioEmbolicStroke | g_Subdoligranulum     | Weighted mode             | 9 | -0.1368 | 0.1210 | 0.2908 | -0.1475 | 0.1339 | 0.3072 | 20.5290 | 0.0085 | 243.0042 |
| CardioEmbolicStroke | g_Sutterella          | MR Egger                  | 9 | 0.4245  | 1.3202 | 0.7572 | -0.1394 | 0.3368 | 0.6915 | 13.6900 | 0.0570 | 31.9311  |
| CardioEmbolicStroke | g_Sutterella          | Weighted median           | 9 | -0.0519 | 0.2063 | 0.8015 | -0.1394 | 0.3368 | 0.6915 | 13.6900 | 0.0570 | 31.9311  |
| CardioEmbolicStroke | g_Sutterella          | Inverse variance weighted | 9 | -0.1153 | 0.1911 | 0.5463 | -0.1394 | 0.3368 | 0.6915 | 13.6900 | 0.0570 | 31.9311  |
| CardioEmbolicStroke | g_Sutterella          | Simple mode               | 9 | -0.0793 | 0.3454 | 0.8241 | -0.1394 | 0.3368 | 0.6915 | 13.6900 | 0.0570 | 31.9311  |
| CardioEmbolicStroke | g_Sutterella          | Weighted mode             | 9 | -0.0996 | 0.3213 | 0.7646 | -0.1394 | 0.3368 | 0.6915 | 13.6900 | 0.0570 | 31.9311  |
| CardioEmbolicStroke | g_Tannerella          | MR Egger                  | 9 | -0.1744 | 0.6988 | 0.8101 | 0.0345  | 0.1782 | 0.8522 | 14.8238 | 0.0383 | 195.9490 |
| CardioEmbolicStroke | g_Tannerella          | Weighted median           | 9 | -0.0814 | 0.1023 | 0.4263 | 0.0345  | 0.1782 | 0.8522 | 14.8238 | 0.0383 | 195.9490 |
| CardioEmbolicStroke | g_Tannerella          | Inverse variance weighted | 9 | -0.0409 | 0.1002 | 0.6830 | 0.0345  | 0.1782 | 0.8522 | 14.8238 | 0.0383 | 195.9490 |
| CardioEmbolicStroke | g_Tannerella          | Simple mode               | 9 | -0.0200 | 0.1729 | 0.9107 | 0.0345  | 0.1782 | 0.8522 | 14.8238 | 0.0383 | 195.9490 |
| CardioEmbolicStroke | g_Tannerella          | Weighted mode             | 9 | -0.0825 | 0.1391 | 0.5697 | 0.0345  | 0.1782 | 0.8522 | 14.8238 | 0.0383 | 195.9490 |
| CardioEmbolicStroke | g_Treponema           | MR Egger                  | 9 | 0.5527  | 0.3615 | 0.1702 | -0.1364 | 0.0922 | 0.1826 | 9.9435  | 0.2690 | 472.7744 |
| CardioEmbolicStroke | g_Treponema           | Weighted median           | 9 | 0.0009  | 0.0779 | 0.9904 | -0.1364 | 0.0922 | 0.1826 | 9.9435  | 0.2690 | 472.7744 |
| CardioEmbolicStroke | g_Treponema           | Inverse variance weighted | 9 | 0.0242  | 0.0592 | 0.6828 | -0.1364 | 0.0922 | 0.1826 | 9.9435  | 0.2690 | 472.7744 |
| CardioEmbolicStroke | g_Treponema           | Simple mode               | 9 | -0.0317 | 0.1349 | 0.8203 | -0.1364 | 0.0922 | 0.1826 | 9.9435  | 0.2690 | 472.7744 |
| CardioEmbolicStroke | g_Treponema           | Weighted mode             | 9 | -0.0146 | 0.1337 | 0.9155 | -0.1364 | 0.0922 | 0.1826 | 9.9435  | 0.2690 | 472.7744 |
| CardioEmbolicStroke | g_Turicibacter        | MR Egger                  | 9 | 0.8447  | 0.7960 | 0.3239 | -0.2488 | 0.2031 | 0.2601 | 7.7596  | 0.4573 | 93.7105  |
| CardioEmbolicStroke | g_Turicibacter        | Weighted median           | 9 | -0.0521 | 0.1673 | 0.7555 | -0.2488 | 0.2031 | 0.2601 | 7.7596  | 0.4573 | 93.7105  |
| CardioEmbolicStroke | g_Turicibacter        | Inverse variance weighted | 9 | -0.1192 | 0.1217 | 0.3271 | -0.2488 | 0.2031 | 0.2601 | 7.7596  | 0.4573 | 93.7105  |
| CardioEmbolicStroke | g_Turicibacter        | Simple mode               | 9 | -0.3788 | 0.2767 | 0.2081 | -0.2488 | 0.2031 | 0.2601 | 7.7596  | 0.4573 | 93.7105  |
| CardioEmbolicStroke | g_Turicibacter        | Weighted mode             | 9 | -0.0956 | 0.2997 | 0.7580 | -0.2488 | 0.2031 | 0.2601 | 7.7596  | 0.4573 | 93.7105  |
| CardioEmbolicStroke | g_Veillonella         | MR Egger                  | 9 | 0.9168  | 0.5343 | 0.1299 | -0.1998 | 0.1363 | 0.1861 | 5.7735  | 0.6726 | 165.4249 |
| CardioEmbolicStroke | g_Veillonella         | Weighted median           | 9 | 0.1623  | 0.1066 | 0.1278 | -0.1998 | 0.1363 | 0.1861 | 5.7735  | 0.6726 | 165.4249 |
| CardioEmbolicStroke | g_Veillonella         | Inverse variance weighted | 9 | 0.1427  | 0.0817 | 0.0806 | -0.1998 | 0.1363 | 0.1861 | 5.7735  | 0.6726 | 165.4249 |
| CardioEmbolicStroke | g_Veillonella         | Simple mode               | 9 | 0.0062  | 0.1631 | 0.9709 | -0.1998 | 0.1363 | 0.1861 | 5.7735  | 0.6726 | 165.4249 |
| CardioEmbolicStroke | g_Veillonella         | Weighted mode             | 9 | 0.1195  | 0.1607 | 0.4784 | -0.1998 | 0.1363 | 0.1861 | 5.7735  | 0.6726 | 165.4249 |
| CardioEmbolicStroke | g_Vibrio              | MR Egger                  | 9 | 0.7028  | 0.7283 | 0.3667 | -0.1994 | 0.1858 | 0.3189 | 5.5591  | 0.6965 | 161.6567 |
| CardioEmbolicStroke | g_Vibrio              | Weighted median           | 9 | -0.0236 | 0.1420 | 0.8680 | -0.1994 | 0.1858 | 0.3189 | 5.5591  | 0.6965 | 161.6567 |
| CardioEmbolicStroke | g_Vibrio              | Inverse variance weighted | 9 | -0.0694 | 0.1113 | 0.5327 | -0.1994 | 0.1858 | 0.3189 | 5.5591  | 0.6965 | 161.6567 |
| CardioEmbolicStroke | g_Vibrio              | Simple mode               | 9 | 0.0417  | 0.2326 | 0.8621 | -0.1994 | 0.1858 | 0.3189 | 5.5591  | 0.6965 | 161.6567 |
| CardioEmbolicStroke | g_Vibrio              | Weighted mode             | 9 | 0.0235  | 0.2007 | 0.9096 | -0.1994 | 0.1858 | 0.3189 | 5.5591  | 0.6965 | 161.6567 |
| CardioEmbolicStroke | log_f_Aeromonadaceae  | MR Egger                  | 9 | -0.5092 | 0.6734 | 0.4742 | 0.1181  | 0.1718 | 0.5139 | 4.0021  | 0.7795 | 297.5919 |
| CardioEmbolicStroke | log_f_Aeromonadaceae  | Weighted median           | 9 | -0.0822 | 0.1373 | 0.5495 | 0.1181  | 0.1718 | 0.5139 | 4.0021  | 0.7795 | 297.5919 |
| CardioEmbolicStroke | log_f_Aeromonadaceae  | Inverse variance weighted | 9 | -0.0517 | 0.1030 | 0.6157 | 0.1181  | 0.1718 | 0.5139 | 4.0021  | 0.7795 | 297.5919 |
| CardioEmbolicStroke | log_f_Aeromonadaceae  | Simple mode               | 9 | -0.1665 | 0.2007 | 0.4307 | 0.1181  | 0.1718 | 0.5139 | 4.0021  | 0.7795 | 297.5919 |
| CardioEmbolicStroke | log_f_Aeromonadaceae  | Weighted mode             | 9 | -0.2007 | 0.2078 | 0.3623 | 0.1181  | 0.1718 | 0.5139 | 4.0021  | 0.7795 | 297.5919 |
| CardioEmbolicStroke | log_f_Alcaligenaceae  | MR Egger                  | 9 | 0.4204  | 0.6742 | 0.5527 | -0.1315 | 0.1720 | 0.4694 | 4.3083  | 0.7437 | 215.4991 |
| CardioEmbolicStroke | log_f_Alcaligenaceae  | Weighted median           | 9 | -0.0359 | 0.1311 | 0.7841 | -0.1315 | 0.1720 | 0.4694 | 4.3083  | 0.7437 | 215.4991 |
| CardioEmbolicStroke | log_f_Alcaligenaceae  | Inverse variance weighted | 9 | -0.0891 | 0.1029 | 0.3866 | -0.1315 | 0.1720 | 0.4694 | 4.3083  | 0.7437 | 215.4991 |
| CardioEmbolicStroke | log_f_Alcaligenaceae  | Simple mode               | 9 | -0.2314 | 0.2367 | 0.3570 | -0.1315 | 0.1720 | 0.4694 | 4.3083  | 0.7437 | 215.4991 |
| CardioEmbolicStroke | log_f_Alcaligenaceae  | Weighted mode             | 9 | -0.0184 | 0.2236 | 0.9366 | -0.1315 | 0.1720 | 0.4694 | 4.3083  | 0.7437 | 215.4991 |
| CardioEmbolicStroke | log_f_Brachyspiraceae | MR Egger                  | 9 | 0.3721  | 0.8178 | 0.6629 | -0.0878 | 0.2087 | 0.6864 | 10.0245 | 0.1872 | 137.5810 |
| CardioEmbolicStroke | log_f_Brachyspiraceae | Weighted median           | 9 | -0.0039 | 0.1489 | 0.9793 | -0.0878 | 0.2087 | 0.6864 | 10.0245 | 0.1872 | 137.5810 |
| CardioEmbolicStroke | log_f_Brachyspiraceae | Inverse variance weighted | 9 | 0.0319  | 0.1185 | 0.7876 | -0.0878 | 0.2087 | 0.6864 | 10.0245 | 0.1872 | 137.5810 |
| CardioEmbolicStroke | log_f_Brachyspiraceae | Simple mode               | 9 | -0.2007 | 0.2475 | 0.4409 | -0.0878 | 0.2087 | 0.6864 | 10.0245 | 0.1872 | 137.5810 |
| CardioEmbolicStroke | log_f_Brachyspiraceae | Weighted mode             | 9 | -0.1143 | 0.2379 | 0.6436 | -0.0878 | 0.2087 | 0.6864 | 10.0245 | 0.1872 | 137.5810 |
| CardioEmbolicStroke | log_f_Comamonadaceae  | MR Egger                  | 9 | -0.2079 | 0.6749 | 0.7671 | 0.0102  | 0.1722 | 0.9543 | 4.3109  | 0.7434 | 121.8347 |
| CardioEmbolicStroke | log_f_Comamonadaceae  | Weighted median           | 9 | -0.1159 | 0.1295 | 0.3711 | 0.0102  | 0.1722 | 0.9543 | 4.3109  | 0.7434 | 121.8347 |
| CardioEmbolicStroke | log_f_Comamonadaceae  | Inverse variance weighted | 9 | -0.1683 | 0.1030 | 0.1022 | 0.0102  | 0.1722 | 0.9543 | 4.3109  | 0.7434 | 121.8347 |
| CardioEmbolicStroke | log_f_Comamonadaceae  | Simple mode               | 9 | -0.1194 | 0.1840 | 0.5345 | 0.0102  | 0.1722 | 0.9543 | 4.3109  | 0.7434 | 121.8347 |
| CardioEmbolicStroke | log_f_Comamonadaceae  | Weighted mode             | 9 | -0.1106 | 0.1850 | 0.5665 | 0.0102  | 0.1722 | 0.9543 | 4.3109  | 0.7434 | 121.8347 |
| CardioEmbolicStroke | log_f_Moraxellaceae   | MR Egger                  | 9 | -0.2897 | 0.6735 | 0.6801 | 0.0313  | 0.1718 | 0.8608 | 3.9850  | 0.7815 | 203.9098 |
| CardioEmbolicStroke | log_f_Moraxellaceae   | Weighted median           | 9 | -0.2633 | 0.1340 | 0.0495 | 0.0313  | 0.1718 | 0.8608 | 3.9850  | 0.7815 | 203.9098 |

|                     |                               |                           |   |         |        |        |         |        |        |         |        |          |
|---------------------|-------------------------------|---------------------------|---|---------|--------|--------|---------|--------|--------|---------|--------|----------|
| CardioEmbolicStroke | log_f_Moraxellaceae           | Inverse variance weighted | 9 | -0.1686 | 0.1029 | 0.1014 | 0.0313  | 0.1718 | 0.8608 | 3.9850  | 0.7815 | 203.9098 |
| CardioEmbolicStroke | log_f_Moraxellaceae           | Simple mode               | 9 | -0.2860 | 0.2248 | 0.2391 | 0.0313  | 0.1718 | 0.8608 | 3.9850  | 0.7815 | 203.9098 |
| CardioEmbolicStroke | log_f_Moraxellaceae           | Weighted mode             | 9 | -0.2951 | 0.2048 | 0.1876 | 0.0313  | 0.1718 | 0.8608 | 3.9850  | 0.7815 | 203.9098 |
| CardioEmbolicStroke | log_f_Paenibacillaceae        | MR Egger                  | 9 | 0.2038  | 0.6798 | 0.7731 | -0.0283 | 0.1735 | 0.8751 | 1.6293  | 0.9775 | 499.4012 |
| CardioEmbolicStroke | log_f_Paenibacillaceae        | Weighted median           | 9 | 0.1221  | 0.1332 | 0.3593 | -0.0283 | 0.1735 | 0.8751 | 1.6293  | 0.9775 | 499.4012 |
| CardioEmbolicStroke | log_f_Paenibacillaceae        | Inverse variance weighted | 9 | 0.0942  | 0.1040 | 0.3647 | -0.0283 | 0.1735 | 0.8751 | 1.6293  | 0.9775 | 499.4012 |
| CardioEmbolicStroke | log_f_Paenibacillaceae        | Simple mode               | 9 | 0.1222  | 0.1841 | 0.5255 | -0.0283 | 0.1735 | 0.8751 | 1.6293  | 0.9775 | 499.4012 |
| CardioEmbolicStroke | log_f_Paenibacillaceae        | Weighted mode             | 9 | 0.1439  | 0.1870 | 0.4637 | -0.0283 | 0.1735 | 0.8751 | 1.6293  | 0.9775 | 499.4012 |
| CardioEmbolicStroke | log_f_Peptococcaceae          | MR Egger                  | 9 | -0.1547 | 0.6762 | 0.8256 | 0.0426  | 0.1725 | 0.8120 | 5.3940  | 0.6120 | 244.3682 |
| CardioEmbolicStroke | log_f_Peptococcaceae          | Weighted median           | 9 | 0.0402  | 0.1348 | 0.7658 | 0.0426  | 0.1725 | 0.8120 | 5.3940  | 0.6120 | 244.3682 |
| CardioEmbolicStroke | log_f_Peptococcaceae          | Inverse variance weighted | 9 | 0.0104  | 0.1033 | 0.9201 | 0.0426  | 0.1725 | 0.8120 | 5.3940  | 0.6120 | 244.3682 |
| CardioEmbolicStroke | log_f_Peptococcaceae          | Simple mode               | 9 | -0.0116 | 0.2126 | 0.9579 | 0.0426  | 0.1725 | 0.8120 | 5.3940  | 0.6120 | 244.3682 |
| CardioEmbolicStroke | log_f_Peptococcaceae          | Weighted mode             | 9 | 0.0030  | 0.1843 | 0.9873 | 0.0426  | 0.1725 | 0.8120 | 5.3940  | 0.6120 | 244.3682 |
| CardioEmbolicStroke | log_f_Pseudomonadaceae        | MR Egger                  | 9 | -0.1272 | 0.6762 | 0.8561 | 0.0128  | 0.1725 | 0.9428 | 5.3804  | 0.6136 | 207.4165 |
| CardioEmbolicStroke | log_f_Pseudomonadaceae        | Weighted median           | 9 | -0.1326 | 0.1403 | 0.3444 | 0.0128  | 0.1725 | 0.9428 | 5.3804  | 0.6136 | 207.4165 |
| CardioEmbolicStroke | log_f_Pseudomonadaceae        | Inverse variance weighted | 9 | -0.0775 | 0.1033 | 0.4531 | 0.0128  | 0.1725 | 0.9428 | 5.3804  | 0.6136 | 207.4165 |
| CardioEmbolicStroke | log_f_Pseudomonadaceae        | Simple mode               | 9 | -0.2572 | 0.2266 | 0.2892 | 0.0128  | 0.1725 | 0.9428 | 5.3804  | 0.6136 | 207.4165 |
| CardioEmbolicStroke | log_f_Pseudomonadaceae        | Weighted mode             | 9 | -0.2131 | 0.2028 | 0.3240 | 0.0128  | 0.1725 | 0.9428 | 5.3804  | 0.6136 | 207.4165 |
| CardioEmbolicStroke | log_f_Rhodocyclaceae          | MR Egger                  | 9 | -0.0795 | 0.7936 | 0.9230 | -0.0169 | 0.2024 | 0.9358 | 9.6453  | 0.2096 | 86.4705  |
| CardioEmbolicStroke | log_f_Rhodocyclaceae          | Weighted median           | 9 | -0.1417 | 0.1379 | 0.3041 | -0.0169 | 0.2024 | 0.9358 | 9.6453  | 0.2096 | 86.4705  |
| CardioEmbolicStroke | log_f_Rhodocyclaceae          | Inverse variance weighted | 9 | -0.1450 | 0.1133 | 0.2006 | -0.0169 | 0.2024 | 0.9358 | 9.6453  | 0.2096 | 86.4705  |
| CardioEmbolicStroke | log_f_Rhodocyclaceae          | Simple mode               | 9 | -0.3124 | 0.2707 | 0.2817 | -0.0169 | 0.2024 | 0.9358 | 9.6453  | 0.2096 | 86.4705  |
| CardioEmbolicStroke | log_f_Rhodocyclaceae          | Weighted mode             | 9 | 0.0710  | 0.2512 | 0.7846 | -0.0169 | 0.2024 | 0.9358 | 9.6453  | 0.2096 | 86.4705  |
| CardioEmbolicStroke | log_f_Succinivibrionaceae     | MR Egger                  | 9 | 0.8868  | 0.7224 | 0.2593 | -0.2286 | 0.1843 | 0.2548 | 9.8461  | 0.2760 | 151.2023 |
| CardioEmbolicStroke | log_f_Succinivibrionaceae     | Weighted median           | 9 | -0.2110 | 0.1499 | 0.1592 | -0.2286 | 0.1843 | 0.2548 | 9.8461  | 0.2760 | 151.2023 |
| CardioEmbolicStroke | log_f_Succinivibrionaceae     | Inverse variance weighted | 9 | 0.0013  | 0.1140 | 0.9912 | -0.2286 | 0.1843 | 0.2548 | 9.8461  | 0.2760 | 151.2023 |
| CardioEmbolicStroke | log_f_Succinivibrionaceae     | Simple mode               | 9 | -0.2720 | 0.2693 | 0.3420 | -0.2286 | 0.1843 | 0.2548 | 9.8461  | 0.2760 | 151.2023 |
| CardioEmbolicStroke | log_f_Succinivibrionaceae     | Weighted mode             | 9 | -0.2720 | 0.2966 | 0.3859 | -0.2286 | 0.1843 | 0.2548 | 9.8461  | 0.2760 | 151.2023 |
| CardioEmbolicStroke | log_f_Thermoanaerobacteraceae | MR Egger                  | 9 | -0.4447 | 0.7516 | 0.5726 | 0.1022  | 0.1918 | 0.6106 | 8.4544  | 0.2942 | 146.0959 |
| CardioEmbolicStroke | log_f_Thermoanaerobacteraceae | Weighted median           | 9 | -0.0489 | 0.1436 | 0.7335 | 0.1022  | 0.1918 | 0.6106 | 8.4544  | 0.2942 | 146.0959 |
| CardioEmbolicStroke | log_f_Thermoanaerobacteraceae | Inverse variance weighted | 9 | -0.0489 | 0.1098 | 0.6558 | 0.1022  | 0.1918 | 0.6106 | 8.4544  | 0.2942 | 146.0959 |
| CardioEmbolicStroke | log_f_Thermoanaerobacteraceae | Simple mode               | 9 | -0.0390 | 0.2048 | 0.8539 | 0.1022  | 0.1918 | 0.6106 | 8.4544  | 0.2942 | 146.0959 |
| CardioEmbolicStroke | log_f_Thermoanaerobacteraceae | Weighted mode             | 9 | -0.0390 | 0.1803 | 0.8343 | 0.1022  | 0.1918 | 0.6106 | 8.4544  | 0.2942 | 146.0959 |
| CardioEmbolicStroke | log_g_Acetivibrio             | MR Egger                  | 9 | -0.1083 | 0.7850 | 0.8942 | 0.0494  | 0.2003 | 0.8123 | 9.3392  | 0.2292 | 150.5571 |
| CardioEmbolicStroke | log_g_Acetivibrio             | Weighted median           | 9 | 0.2501  | 0.1495 | 0.0944 | 0.0494  | 0.2003 | 0.8123 | 9.3392  | 0.2292 | 150.5571 |
| CardioEmbolicStroke | log_g_Acetivibrio             | Inverse variance weighted | 9 | 0.0831  | 0.1128 | 0.4614 | 0.0494  | 0.2003 | 0.8123 | 9.3392  | 0.2292 | 150.5571 |
| CardioEmbolicStroke | log_g_Acetivibrio             | Simple mode               | 9 | 0.3000  | 0.2664 | 0.2927 | 0.0494  | 0.2003 | 0.8123 | 9.3392  | 0.2292 | 150.5571 |
| CardioEmbolicStroke | log_g_Acetivibrio             | Weighted mode             | 9 | 0.3000  | 0.2389 | 0.2447 | 0.0494  | 0.2003 | 0.8123 | 9.3392  | 0.2292 | 150.5571 |
| CardioEmbolicStroke | log_g_Achromobacter           | MR Egger                  | 9 | -0.3391 | 0.7044 | 0.6449 | 0.0509  | 0.1796 | 0.7851 | 7.5441  | 0.3745 | 88.2287  |
| CardioEmbolicStroke | log_g_Achromobacter           | Weighted median           | 9 | -0.0985 | 0.1378 | 0.4745 | 0.0509  | 0.1796 | 0.7851 | 7.5441  | 0.3745 | 88.2287  |
| CardioEmbolicStroke | log_g_Achromobacter           | Inverse variance weighted | 9 | -0.1419 | 0.1033 | 0.1696 | 0.0509  | 0.1796 | 0.7851 | 7.5441  | 0.3745 | 88.2287  |
| CardioEmbolicStroke | log_g_Achromobacter           | Simple mode               | 9 | 0.0627  | 0.2403 | 0.8008 | 0.0509  | 0.1796 | 0.7851 | 7.5441  | 0.3745 | 88.2287  |
| CardioEmbolicStroke | log_g_Achromobacter           | Weighted mode             | 9 | 0.0627  | 0.2163 | 0.7793 | 0.0509  | 0.1796 | 0.7851 | 7.5441  | 0.3745 | 88.2287  |
| CardioEmbolicStroke | log_g_Acidovorax              | MR Egger                  | 9 | -0.7789 | 0.6724 | 0.2847 | 0.1594  | 0.1715 | 0.3836 | 5.3545  | 0.6168 | 79.3409  |
| CardioEmbolicStroke | log_g_Acidovorax              | Weighted median           | 9 | -0.0925 | 0.1321 | 0.4838 | 0.1594  | 0.1715 | 0.3836 | 5.3545  | 0.6168 | 79.3409  |
| CardioEmbolicStroke | log_g_Acidovorax              | Inverse variance weighted | 9 | -0.1612 | 0.1024 | 0.1155 | 0.1594  | 0.1715 | 0.3836 | 5.3545  | 0.6168 | 79.3409  |
| CardioEmbolicStroke | log_g_Acidovorax              | Simple mode               | 9 | -0.0619 | 0.1980 | 0.7626 | 0.1594  | 0.1715 | 0.3836 | 5.3545  | 0.6168 | 79.3409  |
| CardioEmbolicStroke | log_g_Acidovorax              | Weighted mode             | 9 | -0.0523 | 0.1847 | 0.7843 | 0.1594  | 0.1715 | 0.3836 | 5.3545  | 0.6168 | 79.3409  |
| CardioEmbolicStroke | log_g_Actinobacillus          | MR Egger                  | 9 | 1.2305  | 0.6770 | 0.1120 | -0.3340 | 0.1727 | 0.0944 | 5.8798  | 0.6607 | 171.4915 |
| CardioEmbolicStroke | log_g_Actinobacillus          | Weighted median           | 9 | -0.0599 | 0.1366 | 0.6610 | -0.3340 | 0.1727 | 0.0944 | 5.8798  | 0.6607 | 171.4915 |
| CardioEmbolicStroke | log_g_Actinobacillus          | Inverse variance weighted | 9 | -0.0633 | 0.1034 | 0.5406 | -0.3340 | 0.1727 | 0.0944 | 5.8798  | 0.6607 | 171.4915 |
| CardioEmbolicStroke | log_g_Actinobacillus          | Simple mode               | 9 | -0.0865 | 0.2136 | 0.6961 | -0.3340 | 0.1727 | 0.0944 | 5.8798  | 0.6607 | 171.4915 |
| CardioEmbolicStroke | log_g_Actinobacillus          | Weighted mode             | 9 | -0.0085 | 0.1988 | 0.9671 | -0.3340 | 0.1727 | 0.0944 | 5.8798  | 0.6607 | 171.4915 |
| CardioEmbolicStroke | log_g_Alkaliphilus            | MR Egger                  | 9 | 0.6737  | 0.6794 | 0.3544 | -0.1514 | 0.1733 | 0.4114 | 5.0013  | 0.6598 | 211.1224 |
| CardioEmbolicStroke | log_g_Alkaliphilus            | Weighted median           | 9 | 0.1340  | 0.1331 | 0.3140 | -0.1514 | 0.1733 | 0.4114 | 5.0013  | 0.6598 | 211.1224 |
| CardioEmbolicStroke | log_g_Alkaliphilus            | Inverse variance weighted | 9 | 0.0873  | 0.1038 | 0.4008 | -0.1514 | 0.1733 | 0.4114 | 5.0013  | 0.6598 | 211.1224 |
| CardioEmbolicStroke | log_g_Alkaliphilus            | Simple mode               | 9 | 0.1643  | 0.1935 | 0.4206 | -0.1514 | 0.1733 | 0.4114 | 5.0013  | 0.6598 | 211.1224 |
| CardioEmbolicStroke | log_g_Alkaliphilus            | Weighted mode             | 9 | 0.1839  | 0.1796 | 0.3359 | -0.1514 | 0.1733 | 0.4114 | 5.0013  | 0.6598 | 211.1224 |
| CardioEmbolicStroke | log_g_Cellulosilyticum        | MR Egger                  | 9 | -0.0540 | 0.8784 | 0.9527 | 0.0153  | 0.2241 | 0.9474 | 11.9970 | 0.1007 | 139.5845 |
| CardioEmbolicStroke | log_g_Cellulosilyticum        | Weighted median           | 9 | -0.0292 | 0.1360 | 0.8301 | 0.0153  | 0.2241 | 0.9474 | 11.9970 | 0.1007 | 139.5845 |
| CardioEmbolicStroke | log_g_Cellulosilyticum        | Inverse variance weighted | 9 | 0.0053  | 0.1256 | 0.9662 | 0.0153  | 0.2241 | 0.9474 | 11.9970 | 0.1007 | 139.5845 |

|                     |                        |                           |   |         |        |        |         |        |        |         |        |          |
|---------------------|------------------------|---------------------------|---|---------|--------|--------|---------|--------|--------|---------|--------|----------|
| CardioEmbolicStroke | log_g_Cellulosilyticum | Simple mode               | 9 | 0.0180  | 0.1833 | 0.9244 | 0.0153  | 0.2241 | 0.9474 | 11.9970 | 0.1007 | 139.5845 |
| CardioEmbolicStroke | log_g_Cellulosilyticum | Weighted mode             | 9 | -0.0111 | 0.1701 | 0.9497 | 0.0153  | 0.2241 | 0.9474 | 11.9970 | 0.1007 | 139.5845 |
| CardioEmbolicStroke | log_g_Cronobacter      | MR Egger                  | 9 | 0.6807  | 0.6983 | 0.3622 | -0.1648 | 0.1782 | 0.3857 | 7.5553  | 0.3734 | 176.3216 |
| CardioEmbolicStroke | log_g_Cronobacter      | Weighted median           | 9 | 0.1501  | 0.1407 | 0.2860 | -0.1648 | 0.1782 | 0.3857 | 7.5553  | 0.3734 | 176.3216 |
| CardioEmbolicStroke | log_g_Cronobacter      | Inverse variance weighted | 9 | 0.0422  | 0.1058 | 0.6899 | -0.1648 | 0.1782 | 0.3857 | 7.5553  | 0.3734 | 176.3216 |
| CardioEmbolicStroke | log_g_Cronobacter      | Simple mode               | 9 | 0.1502  | 0.2027 | 0.4800 | -0.1648 | 0.1782 | 0.3857 | 7.5553  | 0.3734 | 176.3216 |
| CardioEmbolicStroke | log_g_Cronobacter      | Weighted mode             | 9 | 0.1700  | 0.1831 | 0.3802 | -0.1648 | 0.1782 | 0.3857 | 7.5553  | 0.3734 | 176.3216 |
| CardioEmbolicStroke | log_g_Dickeya          | MR Egger                  | 9 | -0.2802 | 0.7473 | 0.7188 | 0.0382  | 0.1907 | 0.8468 | 8.6622  | 0.2778 | 140.9100 |
| CardioEmbolicStroke | log_g_Dickeya          | Weighted median           | 9 | -0.1762 | 0.1433 | 0.2189 | 0.0382  | 0.1907 | 0.8468 | 8.6622  | 0.2778 | 140.9100 |
| CardioEmbolicStroke | log_g_Dickeya          | Inverse variance weighted | 9 | -0.1322 | 0.1071 | 0.2169 | 0.0382  | 0.1907 | 0.8468 | 8.6622  | 0.2778 | 140.9100 |
| CardioEmbolicStroke | log_g_Dickeya          | Simple mode               | 9 | -0.0898 | 0.2345 | 0.7117 | 0.0382  | 0.1907 | 0.8468 | 8.6622  | 0.2778 | 140.9100 |
| CardioEmbolicStroke | log_g_Dickeya          | Weighted mode             | 9 | -0.1145 | 0.2088 | 0.5984 | 0.0382  | 0.1907 | 0.8468 | 8.6622  | 0.2778 | 140.9100 |
| CardioEmbolicStroke | log_g_Dysgonomonas     | MR Egger                  | 9 | 1.2870  | 0.7034 | 0.1100 | -0.3449 | 0.1795 | 0.0961 | 11.6239 | 0.1688 | 131.7274 |
| CardioEmbolicStroke | log_g_Dysgonomonas     | Weighted median           | 9 | 0.0383  | 0.1460 | 0.7932 | -0.3449 | 0.1795 | 0.0961 | 11.6239 | 0.1688 | 131.7274 |
| CardioEmbolicStroke | log_g_Dysgonomonas     | Inverse variance weighted | 9 | -0.0488 | 0.1243 | 0.6943 | -0.3449 | 0.1795 | 0.0961 | 11.6239 | 0.1688 | 131.7274 |
| CardioEmbolicStroke | log_g_Dysgonomonas     | Simple mode               | 9 | 0.0854  | 0.2401 | 0.7313 | -0.3449 | 0.1795 | 0.0961 | 11.6239 | 0.1688 | 131.7274 |
| CardioEmbolicStroke | log_g_Dysgonomonas     | Weighted mode             | 9 | 0.1660  | 0.1969 | 0.4237 | -0.3449 | 0.1795 | 0.0961 | 11.6239 | 0.1688 | 131.7274 |
| CardioEmbolicStroke | log_g_Ewardsiella      | MR Egger                  | 9 | 0.3919  | 0.6725 | 0.5784 | -0.1273 | 0.1716 | 0.4822 | 4.9036  | 0.6717 | 238.1654 |
| CardioEmbolicStroke | log_g_Ewardsiella      | Weighted median           | 9 | -0.1026 | 0.1377 | 0.4561 | -0.1273 | 0.1716 | 0.4822 | 4.9036  | 0.6717 | 238.1654 |
| CardioEmbolicStroke | log_g_Ewardsiella      | Inverse variance weighted | 9 | -0.1013 | 0.1028 | 0.3243 | -0.1273 | 0.1716 | 0.4822 | 4.9036  | 0.6717 | 238.1654 |
| CardioEmbolicStroke | log_g_Ewardsiella      | Simple mode               | 9 | -0.1009 | 0.2094 | 0.6429 | -0.1273 | 0.1716 | 0.4822 | 4.9036  | 0.6717 | 238.1654 |
| CardioEmbolicStroke | log_g_Ewardsiella      | Weighted mode             | 9 | -0.1230 | 0.2033 | 0.5620 | -0.1273 | 0.1716 | 0.4822 | 4.9036  | 0.6717 | 238.1654 |
| CardioEmbolicStroke | log_g_Epulopiscium     | MR Egger                  | 9 | -0.3623 | 0.6771 | 0.6092 | 0.1174  | 0.1728 | 0.5187 | 3.2350  | 0.8624 | 292.4598 |
| CardioEmbolicStroke | log_g_Epulopiscium     | Weighted median           | 9 | 0.1000  | 0.1317 | 0.4478 | 0.1174  | 0.1728 | 0.5187 | 3.2350  | 0.8624 | 292.4598 |
| CardioEmbolicStroke | log_g_Epulopiscium     | Inverse variance weighted | 9 | 0.0923  | 0.1035 | 0.3724 | 0.1174  | 0.1728 | 0.5187 | 3.2350  | 0.8624 | 292.4598 |
| CardioEmbolicStroke | log_g_Epulopiscium     | Simple mode               | 9 | 0.1261  | 0.2103 | 0.5654 | 0.1174  | 0.1728 | 0.5187 | 3.2350  | 0.8624 | 292.4598 |
| CardioEmbolicStroke | log_g_Epulopiscium     | Weighted mode             | 9 | 0.0850  | 0.1933 | 0.6718 | 0.1174  | 0.1728 | 0.5187 | 3.2350  | 0.8624 | 292.4598 |
| CardioEmbolicStroke | log_g_Eremococcus      | MR Egger                  | 9 | 0.4964  | 0.6718 | 0.4839 | -0.1833 | 0.1714 | 0.3203 | 6.5210  | 0.5891 | 139.2469 |
| CardioEmbolicStroke | log_g_Eremococcus      | Weighted median           | 9 | -0.1790 | 0.1357 | 0.1872 | -0.1833 | 0.1714 | 0.3203 | 6.5210  | 0.5891 | 139.2469 |
| CardioEmbolicStroke | log_g_Eremococcus      | Inverse variance weighted | 9 | -0.2136 | 0.1027 | 0.0375 | -0.1833 | 0.1714 | 0.3203 | 6.5210  | 0.5891 | 139.2469 |
| CardioEmbolicStroke | log_g_Eremococcus      | Simple mode               | 9 | -0.1641 | 0.1959 | 0.4265 | -0.1833 | 0.1714 | 0.3203 | 6.5210  | 0.5891 | 139.2469 |
| CardioEmbolicStroke | log_g_Eremococcus      | Weighted mode             | 9 | -0.1493 | 0.1812 | 0.4340 | -0.1833 | 0.1714 | 0.3203 | 6.5210  | 0.5891 | 139.2469 |
| CardioEmbolicStroke | log_g_Erwinia          | MR Egger                  | 9 | -0.0845 | 0.6748 | 0.9039 | -0.0017 | 0.1721 | 0.9922 | 2.2671  | 0.9436 | 340.6566 |
| CardioEmbolicStroke | log_g_Erwinia          | Weighted median           | 9 | -0.0302 | 0.1258 | 0.8104 | -0.0017 | 0.1721 | 0.9922 | 2.2671  | 0.9436 | 340.6566 |
| CardioEmbolicStroke | log_g_Erwinia          | Inverse variance weighted | 9 | -0.0913 | 0.1031 | 0.3760 | -0.0017 | 0.1721 | 0.9922 | 2.2671  | 0.9436 | 340.6566 |
| CardioEmbolicStroke | log_g_Erwinia          | Simple mode               | 9 | -0.0059 | 0.1930 | 0.9763 | -0.0017 | 0.1721 | 0.9922 | 2.2671  | 0.9436 | 340.6566 |
| CardioEmbolicStroke | log_g_Erwinia          | Weighted mode             | 9 | 0.0002  | 0.1819 | 0.9992 | -0.0017 | 0.1721 | 0.9922 | 2.2671  | 0.9436 | 340.6566 |
| CardioEmbolicStroke | log_g_Ethanoligenens   | MR Egger                  | 9 | -0.1035 | 0.6825 | 0.8837 | -0.0192 | 0.1742 | 0.9155 | 4.1984  | 0.7567 | 169.9848 |
| CardioEmbolicStroke | log_g_Ethanoligenens   | Weighted median           | 9 | -0.1099 | 0.1298 | 0.3971 | -0.0192 | 0.1742 | 0.9155 | 4.1984  | 0.7567 | 169.9848 |
| CardioEmbolicStroke | log_g_Ethanoligenens   | Inverse variance weighted | 9 | -0.1777 | 0.1044 | 0.0887 | -0.0192 | 0.1742 | 0.9155 | 4.1984  | 0.7567 | 169.9848 |
| CardioEmbolicStroke | log_g_Ethanoligenens   | Simple mode               | 9 | -0.1082 | 0.2073 | 0.6157 | -0.0192 | 0.1742 | 0.9155 | 4.1984  | 0.7567 | 169.9848 |
| CardioEmbolicStroke | log_g_Ethanoligenens   | Weighted mode             | 9 | -0.0960 | 0.1820 | 0.6124 | -0.0192 | 0.1742 | 0.9155 | 4.1984  | 0.7567 | 169.9848 |
| CardioEmbolicStroke | log_g_Filifactor       | MR Egger                  | 9 | -0.2630 | 0.6723 | 0.7074 | 0.0688  | 0.1715 | 0.7004 | 5.5820  | 0.5893 | 241.4936 |
| CardioEmbolicStroke | log_g_Filifactor       | Weighted median           | 9 | 0.0032  | 0.1329 | 0.9809 | 0.0688  | 0.1715 | 0.7004 | 5.5820  | 0.5893 | 241.4936 |
| CardioEmbolicStroke | log_g_Filifactor       | Inverse variance weighted | 9 | 0.0034  | 0.1028 | 0.9733 | 0.0688  | 0.1715 | 0.7004 | 5.5820  | 0.5893 | 241.4936 |
| CardioEmbolicStroke | log_g_Filifactor       | Simple mode               | 9 | 0.0150  | 0.2009 | 0.9423 | 0.0688  | 0.1715 | 0.7004 | 5.5820  | 0.5893 | 241.4936 |
| CardioEmbolicStroke | log_g_Filifactor       | Weighted mode             | 9 | 0.0055  | 0.1825 | 0.9766 | 0.0688  | 0.1715 | 0.7004 | 5.5820  | 0.5893 | 241.4936 |
| CardioEmbolicStroke | log_g_Finegoldia       | MR Egger                  | 9 | 0.5674  | 0.7032 | 0.4463 | -0.1363 | 0.1794 | 0.4724 | 7.4893  | 0.3798 | 180.2997 |
| CardioEmbolicStroke | log_g_Finegoldia       | Weighted median           | 9 | 0.0383  | 0.1444 | 0.7908 | -0.1363 | 0.1794 | 0.4724 | 7.4893  | 0.3798 | 180.2997 |
| CardioEmbolicStroke | log_g_Finegoldia       | Inverse variance weighted | 9 | 0.0397  | 0.1047 | 0.7046 | -0.1363 | 0.1794 | 0.4724 | 7.4893  | 0.3798 | 180.2997 |
| CardioEmbolicStroke | log_g_Finegoldia       | Simple mode               | 9 | 0.0323  | 0.2481 | 0.8995 | -0.1363 | 0.1794 | 0.4724 | 7.4893  | 0.3798 | 180.2997 |
| CardioEmbolicStroke | log_g_Finegoldia       | Weighted mode             | 9 | 0.0704  | 0.2265 | 0.7637 | -0.1363 | 0.1794 | 0.4724 | 7.4893  | 0.3798 | 180.2997 |
| CardioEmbolicStroke | log_g_Gardnerella      | MR Egger                  | 9 | 0.5125  | 0.6894 | 0.4814 | -0.1373 | 0.1758 | 0.4604 | 3.6249  | 0.8218 | 304.6453 |
| CardioEmbolicStroke | log_g_Gardnerella      | Weighted median           | 9 | 0.0179  | 0.1404 | 0.8984 | -0.1373 | 0.1758 | 0.4604 | 3.6249  | 0.8218 | 304.6453 |
| CardioEmbolicStroke | log_g_Gardnerella      | Inverse variance weighted | 9 | -0.0196 | 0.1053 | 0.8526 | -0.1373 | 0.1758 | 0.4604 | 3.6249  | 0.8218 | 304.6453 |
| CardioEmbolicStroke | log_g_Gardnerella      | Simple mode               | 9 | 0.0329  | 0.2100 | 0.8792 | -0.1373 | 0.1758 | 0.4604 | 3.6249  | 0.8218 | 304.6453 |
| CardioEmbolicStroke | log_g_Gardnerella      | Weighted mode             | 9 | 0.0352  | 0.2162 | 0.8747 | -0.1373 | 0.1758 | 0.4604 | 3.6249  | 0.8218 | 304.6453 |
| CardioEmbolicStroke | log_g_Helicobacter     | MR Egger                  | 9 | 0.1594  | 0.6838 | 0.8224 | -0.0281 | 0.1744 | 0.8767 | 2.9264  | 0.8917 | 377.4011 |
| CardioEmbolicStroke | log_g_Helicobacter     | Weighted median           | 9 | 0.0651  | 0.1351 | 0.6299 | -0.0281 | 0.1744 | 0.8767 | 2.9264  | 0.8917 | 377.4011 |
| CardioEmbolicStroke | log_g_Helicobacter     | Inverse variance weighted | 9 | 0.0506  | 0.1044 | 0.6278 | -0.0281 | 0.1744 | 0.8767 | 2.9264  | 0.8917 | 377.4011 |
| CardioEmbolicStroke | log_g_Helicobacter     | Simple mode               | 9 | 0.1256  | 0.1958 | 0.5392 | -0.0281 | 0.1744 | 0.8767 | 2.9264  | 0.8917 | 377.4011 |

|                     |                         |                           |   |         |        |        |         |        |        |         |        |          |
|---------------------|-------------------------|---------------------------|---|---------|--------|--------|---------|--------|--------|---------|--------|----------|
| CardioEmbolicStroke | log_g_Helicobacter      | Weighted mode             | 9 | 0.1001  | 0.2008 | 0.6315 | -0.0281 | 0.1744 | 0.8767 | 2.9264  | 0.8917 | 377.4011 |
| CardioEmbolicStroke | log_g_Histophilus       | MR Egger                  | 9 | 0.1637  | 0.6750 | 0.8153 | -0.0577 | 0.1722 | 0.7473 | 1.7973  | 0.9702 | 456.9327 |
| CardioEmbolicStroke | log_g_Histophilus       | Weighted median           | 9 | -0.0458 | 0.1344 | 0.7334 | -0.0577 | 0.1722 | 0.7473 | 1.7973  | 0.9702 | 456.9327 |
| CardioEmbolicStroke | log_g_Histophilus       | Inverse variance weighted | 9 | -0.0599 | 0.1031 | 0.5613 | -0.0577 | 0.1722 | 0.7473 | 1.7973  | 0.9702 | 456.9327 |
| CardioEmbolicStroke | log_g_Histophilus       | Simple mode               | 9 | -0.0597 | 0.2030 | 0.7762 | -0.0577 | 0.1722 | 0.7473 | 1.7973  | 0.9702 | 456.9327 |
| CardioEmbolicStroke | log_g_Histophilus       | Weighted mode             | 9 | -0.0803 | 0.1967 | 0.6939 | -0.0577 | 0.1722 | 0.7473 | 1.7973  | 0.9702 | 456.9327 |
| CardioEmbolicStroke | log_g_Kingella          | MR Egger                  | 9 | 0.8900  | 0.6745 | 0.2285 | -0.2395 | 0.1721 | 0.2066 | 7.5737  | 0.4762 | 186.7641 |
| CardioEmbolicStroke | log_g_Kingella          | Weighted median           | 9 | -0.0361 | 0.1428 | 0.8004 | -0.2395 | 0.1721 | 0.2066 | 7.5737  | 0.4762 | 186.7641 |
| CardioEmbolicStroke | log_g_Kingella          | Inverse variance weighted | 9 | -0.0378 | 0.1031 | 0.7142 | -0.2395 | 0.1721 | 0.2066 | 7.5737  | 0.4762 | 186.7641 |
| CardioEmbolicStroke | log_g_Kingella          | Simple mode               | 9 | 0.0480  | 0.2494 | 0.8520 | -0.2395 | 0.1721 | 0.2066 | 7.5737  | 0.4762 | 186.7641 |
| CardioEmbolicStroke | log_g_Kingella          | Weighted mode             | 9 | 0.0409  | 0.2372 | 0.8674 | -0.2395 | 0.1721 | 0.2066 | 7.5737  | 0.4762 | 186.7641 |
| CardioEmbolicStroke | log_g_Lawsonia          | MR Egger                  | 9 | -0.6556 | 0.9825 | 0.5260 | 0.1500  | 0.2506 | 0.5684 | 14.1689 | 0.0483 | 61.1936  |
| CardioEmbolicStroke | log_g_Lawsonia          | Weighted median           | 9 | -0.1198 | 0.1485 | 0.4197 | 0.1500  | 0.2506 | 0.5684 | 14.1689 | 0.0483 | 61.1936  |
| CardioEmbolicStroke | log_g_Lawsonia          | Inverse variance weighted | 9 | -0.0744 | 0.1438 | 0.6047 | 0.1500  | 0.2506 | 0.5684 | 14.1689 | 0.0483 | 61.1936  |
| CardioEmbolicStroke | log_g_Lawsonia          | Simple mode               | 9 | -0.1345 | 0.2414 | 0.5927 | 0.1500  | 0.2506 | 0.5684 | 14.1689 | 0.0483 | 61.1936  |
| CardioEmbolicStroke | log_g_Lawsonia          | Weighted mode             | 9 | -0.1060 | 0.2148 | 0.6350 | 0.1500  | 0.2506 | 0.5684 | 14.1689 | 0.0483 | 61.1936  |
| CardioEmbolicStroke | log_g_Leuconostoc       | MR Egger                  | 9 | -0.4300 | 0.6834 | 0.5492 | 0.0859  | 0.1743 | 0.6372 | 4.1516  | 0.7622 | 238.7129 |
| CardioEmbolicStroke | log_g_Leuconostoc       | Weighted median           | 9 | -0.0504 | 0.1364 | 0.7120 | 0.0859  | 0.1743 | 0.6372 | 4.1516  | 0.7622 | 238.7129 |
| CardioEmbolicStroke | log_g_Leuconostoc       | Inverse variance weighted | 9 | -0.0972 | 0.1044 | 0.3522 | 0.0859  | 0.1743 | 0.6372 | 4.1516  | 0.7622 | 238.7129 |
| CardioEmbolicStroke | log_g_Leuconostoc       | Simple mode               | 9 | 0.0800  | 0.2318 | 0.7388 | 0.0859  | 0.1743 | 0.6372 | 4.1516  | 0.7622 | 238.7129 |
| CardioEmbolicStroke | log_g_Leuconostoc       | Weighted mode             | 9 | 0.0887  | 0.2276 | 0.7070 | 0.0859  | 0.1743 | 0.6372 | 4.1516  | 0.7622 | 238.7129 |
| CardioEmbolicStroke | log_g_Methylobacillus   | MR Egger                  | 9 | 0.2019  | 0.7637 | 0.7991 | -0.0712 | 0.1947 | 0.7255 | 8.8731  | 0.2619 | 99.9820  |
| CardioEmbolicStroke | log_g_Methylobacillus   | Weighted median           | 9 | -0.0642 | 0.1434 | 0.6545 | -0.0712 | 0.1947 | 0.7255 | 8.8731  | 0.2619 | 99.9820  |
| CardioEmbolicStroke | log_g_Methylobacillus   | Inverse variance weighted | 9 | -0.0740 | 0.1098 | 0.5006 | -0.0712 | 0.1947 | 0.7255 | 8.8731  | 0.2619 | 99.9820  |
| CardioEmbolicStroke | log_g_Methylobacillus   | Simple mode               | 9 | -0.0460 | 0.2376 | 0.8513 | -0.0712 | 0.1947 | 0.7255 | 8.8731  | 0.2619 | 99.9820  |
| CardioEmbolicStroke | log_g_Methylobacillus   | Weighted mode             | 9 | -0.0344 | 0.2305 | 0.8852 | -0.0712 | 0.1947 | 0.7255 | 8.8731  | 0.2619 | 99.9820  |
| CardioEmbolicStroke | log_g_Olsenella         | MR Egger                  | 9 | 0.1674  | 0.6819 | 0.8132 | -0.0872 | 0.1740 | 0.6315 | 2.6570  | 0.9148 | 221.7753 |
| CardioEmbolicStroke | log_g_Olsenella         | Weighted median           | 9 | -0.1771 | 0.1341 | 0.1867 | -0.0872 | 0.1740 | 0.6315 | 2.6570  | 0.9148 | 221.7753 |
| CardioEmbolicStroke | log_g_Olsenella         | Inverse variance weighted | 9 | -0.1705 | 0.1042 | 0.1018 | -0.0872 | 0.1740 | 0.6315 | 2.6570  | 0.9148 | 221.7753 |
| CardioEmbolicStroke | log_g_Olsenella         | Simple mode               | 9 | -0.2107 | 0.1955 | 0.3125 | -0.0872 | 0.1740 | 0.6315 | 2.6570  | 0.9148 | 221.7753 |
| CardioEmbolicStroke | log_g_Olsenella         | Weighted mode             | 9 | -0.2022 | 0.1818 | 0.2983 | -0.0872 | 0.1740 | 0.6315 | 2.6570  | 0.9148 | 221.7753 |
| CardioEmbolicStroke | log_g_Ornithinibacillus | MR Egger                  | 9 | 0.1744  | 0.6782 | 0.8045 | -0.0042 | 0.1730 | 0.9813 | 2.0772  | 0.9554 | 289.8885 |
| CardioEmbolicStroke | log_g_Ornithinibacillus | Weighted median           | 9 | 0.1248  | 0.1255 | 0.3201 | -0.0042 | 0.1730 | 0.9813 | 2.0772  | 0.9554 | 289.8885 |
| CardioEmbolicStroke | log_g_Ornithinibacillus | Inverse variance weighted | 9 | 0.1582  | 0.1036 | 0.1268 | -0.0042 | 0.1730 | 0.9813 | 2.0772  | 0.9554 | 289.8885 |
| CardioEmbolicStroke | log_g_Ornithinibacillus | Simple mode               | 9 | 0.1250  | 0.1845 | 0.5173 | -0.0042 | 0.1730 | 0.9813 | 2.0772  | 0.9554 | 289.8885 |
| CardioEmbolicStroke | log_g_Ornithinibacillus | Weighted mode             | 9 | 0.1250  | 0.1850 | 0.5184 | -0.0042 | 0.1730 | 0.9813 | 2.0772  | 0.9554 | 289.8885 |
| CardioEmbolicStroke | log_g_Paenibacillus     | MR Egger                  | 9 | 0.1886  | 0.7034 | 0.7963 | -0.0275 | 0.1795 | 0.8824 | 7.4513  | 0.3835 | 184.2002 |
| CardioEmbolicStroke | log_g_Paenibacillus     | Weighted median           | 9 | 0.0518  | 0.1392 | 0.7096 | -0.0275 | 0.1795 | 0.8824 | 7.4513  | 0.3835 | 184.2002 |
| CardioEmbolicStroke | log_g_Paenibacillus     | Inverse variance weighted | 9 | 0.0820  | 0.1043 | 0.4316 | -0.0275 | 0.1795 | 0.8824 | 7.4513  | 0.3835 | 184.2002 |
| CardioEmbolicStroke | log_g_Paenibacillus     | Simple mode               | 9 | 0.0203  | 0.2017 | 0.9223 | -0.0275 | 0.1795 | 0.8824 | 7.4513  | 0.3835 | 184.2002 |
| CardioEmbolicStroke | log_g_Paenibacillus     | Weighted mode             | 9 | 0.0362  | 0.1962 | 0.8584 | -0.0275 | 0.1795 | 0.8824 | 7.4513  | 0.3835 | 184.2002 |
| CardioEmbolicStroke | log_g_Pantoea           | MR Egger                  | 9 | -0.6881 | 0.8840 | 0.4618 | 0.1593  | 0.2254 | 0.5026 | 11.8570 | 0.1054 | 53.0309  |
| CardioEmbolicStroke | log_g_Pantoea           | Weighted median           | 9 | 0.0983  | 0.1426 | 0.4905 | 0.1593  | 0.2254 | 0.5026 | 11.8570 | 0.1054 | 53.0309  |
| CardioEmbolicStroke | log_g_Pantoea           | Inverse variance weighted | 9 | -0.0707 | 0.1302 | 0.5874 | 0.1593  | 0.2254 | 0.5026 | 11.8570 | 0.1054 | 53.0309  |
| CardioEmbolicStroke | log_g_Pantoea           | Simple mode               | 9 | 0.1003  | 0.1993 | 0.6283 | 0.1593  | 0.2254 | 0.5026 | 11.8570 | 0.1054 | 53.0309  |
| CardioEmbolicStroke | log_g_Pantoea           | Weighted mode             | 9 | 0.1039  | 0.1840 | 0.5876 | 0.1593  | 0.2254 | 0.5026 | 11.8570 | 0.1054 | 53.0309  |
| CardioEmbolicStroke | log_g_Pectobacterium    | MR Egger                  | 9 | -0.0826 | 0.6734 | 0.9058 | 0.0013  | 0.1718 | 0.9941 | 4.1504  | 0.7623 | 206.8125 |
| CardioEmbolicStroke | log_g_Pectobacterium    | Weighted median           | 9 | 0.0083  | 0.1335 | 0.9502 | 0.0013  | 0.1718 | 0.9941 | 4.1504  | 0.7623 | 206.8125 |
| CardioEmbolicStroke | log_g_Pectobacterium    | Inverse variance weighted | 9 | -0.0775 | 0.1028 | 0.4505 | 0.0013  | 0.1718 | 0.9941 | 4.1504  | 0.7623 | 206.8125 |
| CardioEmbolicStroke | log_g_Pectobacterium    | Simple mode               | 9 | 0.0710  | 0.2082 | 0.7419 | 0.0013  | 0.1718 | 0.9941 | 4.1504  | 0.7623 | 206.8125 |
| CardioEmbolicStroke | log_g_Pectobacterium    | Weighted mode             | 9 | 0.0658  | 0.1871 | 0.7342 | 0.0013  | 0.1718 | 0.9941 | 4.1504  | 0.7623 | 206.8125 |
| CardioEmbolicStroke | log_g_Pseudoramibacter  | MR Egger                  | 9 | -0.1748 | 0.6788 | 0.8041 | 0.0493  | 0.1732 | 0.7842 | 6.3743  | 0.4968 | 218.2004 |
| CardioEmbolicStroke | log_g_Pseudoramibacter  | Weighted median           | 9 | 0.0678  | 0.1406 | 0.6298 | 0.0493  | 0.1732 | 0.7842 | 6.3743  | 0.4968 | 218.2004 |
| CardioEmbolicStroke | log_g_Pseudoramibacter  | Inverse variance weighted | 9 | 0.0160  | 0.1039 | 0.8774 | 0.0493  | 0.1732 | 0.7842 | 6.3743  | 0.4968 | 218.2004 |
| CardioEmbolicStroke | log_g_Pseudoramibacter  | Simple mode               | 9 | 0.1555  | 0.2333 | 0.5238 | 0.0493  | 0.1732 | 0.7842 | 6.3743  | 0.4968 | 218.2004 |
| CardioEmbolicStroke | log_g_Pseudoramibacter  | Weighted mode             | 9 | 0.1280  | 0.2275 | 0.5891 | 0.0493  | 0.1732 | 0.7842 | 6.3743  | 0.4968 | 218.2004 |
| CardioEmbolicStroke | log_g_Rahnella          | MR Egger                  | 9 | -0.0473 | 0.6715 | 0.9459 | -0.0155 | 0.1713 | 0.9304 | 5.8104  | 0.5621 | 184.8470 |
| CardioEmbolicStroke | log_g_Rahnella          | Weighted median           | 9 | -0.0478 | 0.1380 | 0.7288 | -0.0155 | 0.1713 | 0.9304 | 5.8104  | 0.5621 | 184.8470 |
| CardioEmbolicStroke | log_g_Rahnella          | Inverse variance weighted | 9 | -0.1074 | 0.1026 | 0.2953 | -0.0155 | 0.1713 | 0.9304 | 5.8104  | 0.5621 | 184.8470 |
| CardioEmbolicStroke | log_g_Rahnella          | Simple mode               | 9 | -0.0483 | 0.2102 | 0.8240 | -0.0155 | 0.1713 | 0.9304 | 5.8104  | 0.5621 | 184.8470 |
| CardioEmbolicStroke | log_g_Rahnella          | Weighted mode             | 9 | -0.0462 | 0.1975 | 0.8210 | -0.0155 | 0.1713 | 0.9304 | 5.8104  | 0.5621 | 184.8470 |

|                     |                             |                           |   |         |        |        |         |        |        |         |        |          |
|---------------------|-----------------------------|---------------------------|---|---------|--------|--------|---------|--------|--------|---------|--------|----------|
| CardioEmbolicStroke | log_g_Selenomonas           | MR Egger                  | 9 | 0.3111  | 0.6701 | 0.6566 | -0.1175 | 0.1710 | 0.5141 | 5.6915  | 0.5762 | 195.1662 |
| CardioEmbolicStroke | log_g_Selenomonas           | Weighted median           | 9 | 0.0038  | 0.1420 | 0.9788 | -0.1175 | 0.1710 | 0.5141 | 5.6915  | 0.5762 | 195.1662 |
| CardioEmbolicStroke | log_g_Selenomonas           | Inverse variance weighted | 9 | -0.1440 | 0.1024 | 0.1598 | -0.1175 | 0.1710 | 0.5141 | 5.6915  | 0.5762 | 195.1662 |
| CardioEmbolicStroke | log_g_Selenomonas           | Simple mode               | 9 | 0.0560  | 0.2333 | 0.8163 | -0.1175 | 0.1710 | 0.5141 | 5.6915  | 0.5762 | 195.1662 |
| CardioEmbolicStroke | log_g_Selenomonas           | Weighted mode             | 9 | 0.0683  | 0.2134 | 0.7571 | -0.1175 | 0.1710 | 0.5141 | 5.6915  | 0.5762 | 195.1662 |
| CardioEmbolicStroke | log_g_Serratia              | MR Egger                  | 9 | -0.2963 | 0.6753 | 0.6740 | 0.0143  | 0.1722 | 0.9362 | 6.7617  | 0.4541 | 59.4519  |
| CardioEmbolicStroke | log_g_Serratia              | Weighted median           | 9 | -0.0665 | 0.1384 | 0.6310 | 0.0143  | 0.1722 | 0.9362 | 6.7617  | 0.4541 | 59.4519  |
| CardioEmbolicStroke | log_g_Serratia              | Inverse variance weighted | 9 | -0.2409 | 0.1028 | 0.0191 | 0.0143  | 0.1722 | 0.9362 | 6.7617  | 0.4541 | 59.4519  |
| CardioEmbolicStroke | log_g_Serratia              | Simple mode               | 9 | -0.1059 | 0.2136 | 0.6334 | 0.0143  | 0.1722 | 0.9362 | 6.7617  | 0.4541 | 59.4519  |
| CardioEmbolicStroke | log_g_Serratia              | Weighted mode             | 9 | -0.0763 | 0.1821 | 0.6863 | 0.0143  | 0.1722 | 0.9362 | 6.7617  | 0.4541 | 59.4519  |
| CardioEmbolicStroke | log_g_Shewanella            | MR Egger                  | 9 | -0.7845 | 0.7534 | 0.3324 | 0.1401  | 0.1921 | 0.4895 | 8.6067  | 0.2821 | 45.3404  |
| CardioEmbolicStroke | log_g_Shewanella            | Weighted median           | 9 | -0.1338 | 0.1389 | 0.3355 | 0.1401  | 0.1921 | 0.4895 | 8.6067  | 0.2821 | 45.3404  |
| CardioEmbolicStroke | log_g_Shewanella            | Inverse variance weighted | 9 | -0.2414 | 0.1112 | 0.0299 | 0.1401  | 0.1921 | 0.4895 | 8.6067  | 0.2821 | 45.3404  |
| CardioEmbolicStroke | log_g_Shewanella            | Simple mode               | 9 | -0.0829 | 0.2293 | 0.7271 | 0.1401  | 0.1921 | 0.4895 | 8.6067  | 0.2821 | 45.3404  |
| CardioEmbolicStroke | log_g_Shewanella            | Weighted mode             | 9 | -0.0601 | 0.1945 | 0.7654 | 0.1401  | 0.1921 | 0.4895 | 8.6067  | 0.2821 | 45.3404  |
| CardioEmbolicStroke | log_g_Slackia               | MR Egger                  | 9 | 0.5457  | 0.7662 | 0.4994 | -0.1247 | 0.1954 | 0.5438 | 8.9059  | 0.2595 | 96.5683  |
| CardioEmbolicStroke | log_g_Slackia               | Weighted median           | 9 | 0.1101  | 0.1469 | 0.4537 | -0.1247 | 0.1954 | 0.5438 | 8.9059  | 0.2595 | 96.5683  |
| CardioEmbolicStroke | log_g_Slackia               | Inverse variance weighted | 9 | 0.0626  | 0.1125 | 0.5781 | -0.1247 | 0.1954 | 0.5438 | 8.9059  | 0.2595 | 96.5683  |
| CardioEmbolicStroke | log_g_Slackia               | Simple mode               | 9 | 0.2349  | 0.2471 | 0.3697 | -0.1247 | 0.1954 | 0.5438 | 8.9059  | 0.2595 | 96.5683  |
| CardioEmbolicStroke | log_g_Slackia               | Weighted mode             | 9 | 0.1440  | 0.2126 | 0.5173 | -0.1247 | 0.1954 | 0.5438 | 8.9059  | 0.2595 | 96.5683  |
| CardioEmbolicStroke | log_g_Sodalis               | MR Egger                  | 9 | -0.0545 | 0.8282 | 0.9494 | -0.0004 | 0.2113 | 0.9984 | 10.5315 | 0.1604 | 134.3544 |
| CardioEmbolicStroke | log_g_Sodalis               | Weighted median           | 9 | -0.0700 | 0.1499 | 0.6407 | -0.0004 | 0.2113 | 0.9984 | 10.5315 | 0.1604 | 134.3544 |
| CardioEmbolicStroke | log_g_Sodalis               | Inverse variance weighted | 9 | -0.0562 | 0.1183 | 0.6347 | -0.0004 | 0.2113 | 0.9984 | 10.5315 | 0.1604 | 134.3544 |
| CardioEmbolicStroke | log_g_Sodalis               | Simple mode               | 9 | -0.2593 | 0.2583 | 0.3449 | -0.0004 | 0.2113 | 0.9984 | 10.5315 | 0.1604 | 134.3544 |
| CardioEmbolicStroke | log_g_Sodalis               | Weighted mode             | 9 | -0.1927 | 0.2317 | 0.4298 | -0.0004 | 0.2113 | 0.9984 | 10.5315 | 0.1604 | 134.3544 |
| CardioEmbolicStroke | log_g_Thauera               | MR Egger                  | 9 | 0.4802  | 0.6710 | 0.4974 | -0.1297 | 0.1712 | 0.4733 | 6.2945  | 0.5058 | 194.1699 |
| CardioEmbolicStroke | log_g_Thauera               | Weighted median           | 9 | 0.1473  | 0.1347 | 0.2741 | -0.1297 | 0.1712 | 0.4733 | 6.2945  | 0.5058 | 194.1699 |
| CardioEmbolicStroke | log_g_Thauera               | Inverse variance weighted | 9 | -0.0223 | 0.1025 | 0.8281 | -0.1297 | 0.1712 | 0.4733 | 6.2945  | 0.5058 | 194.1699 |
| CardioEmbolicStroke | log_g_Thauera               | Simple mode               | 9 | 0.1781  | 0.2363 | 0.4728 | -0.1297 | 0.1712 | 0.4733 | 6.2945  | 0.5058 | 194.1699 |
| CardioEmbolicStroke | log_g_Thauera               | Weighted mode             | 9 | 0.1781  | 0.2007 | 0.4009 | -0.1297 | 0.1712 | 0.4733 | 6.2945  | 0.5058 | 194.1699 |
| CardioEmbolicStroke | log_g_Thermoanaerobacter    | MR Egger                  | 9 | -0.1125 | 0.6853 | 0.8743 | 0.0177  | 0.1749 | 0.9224 | 2.2668  | 0.9436 | 464.2727 |
| CardioEmbolicStroke | log_g_Thermoanaerobacter    | Weighted median           | 9 | -0.0567 | 0.1280 | 0.6578 | 0.0177  | 0.1749 | 0.9224 | 2.2668  | 0.9436 | 464.2727 |
| CardioEmbolicStroke | log_g_Thermoanaerobacter    | Inverse variance weighted | 9 | -0.0441 | 0.1048 | 0.6741 | 0.0177  | 0.1749 | 0.9224 | 2.2668  | 0.9436 | 464.2727 |
| CardioEmbolicStroke | log_g_Thermoanaerobacter    | Simple mode               | 9 | -0.0734 | 0.1993 | 0.7224 | 0.0177  | 0.1749 | 0.9224 | 2.2668  | 0.9436 | 464.2727 |
| CardioEmbolicStroke | log_g_Thermoanaerobacter    | Weighted mode             | 9 | -0.0665 | 0.1949 | 0.7418 | 0.0177  | 0.1749 | 0.9224 | 2.2668  | 0.9436 | 464.2727 |
| CardioEmbolicStroke | log_g_Thermoanaerobacterium | MR Egger                  | 9 | -0.2559 | 0.7633 | 0.7473 | 0.0567  | 0.1947 | 0.7794 | 8.7338  | 0.2723 | 143.4341 |
| CardioEmbolicStroke | log_g_Thermoanaerobacterium | Weighted median           | 9 | -0.0809 | 0.1463 | 0.5805 | 0.0567  | 0.1947 | 0.7794 | 8.7338  | 0.2723 | 143.4341 |
| CardioEmbolicStroke | log_g_Thermoanaerobacterium | Inverse variance weighted | 9 | -0.0363 | 0.1098 | 0.7408 | 0.0567  | 0.1947 | 0.7794 | 8.7338  | 0.2723 | 143.4341 |
| CardioEmbolicStroke | log_g_Thermoanaerobacterium | Simple mode               | 9 | -0.2944 | 0.2849 | 0.3317 | 0.0567  | 0.1947 | 0.7794 | 8.7338  | 0.2723 | 143.4341 |
| CardioEmbolicStroke | log_g_Thermoanaerobacterium | Weighted mode             | 9 | -0.3018 | 0.2808 | 0.3139 | 0.0567  | 0.1947 | 0.7794 | 8.7338  | 0.2723 | 143.4341 |
| CardioEmbolicStroke | log_g_Thermosinus           | MR Egger                  | 9 | -0.0882 | 0.6746 | 0.8996 | -0.0181 | 0.1721 | 0.9191 | 5.7606  | 0.5680 | 158.0777 |
| CardioEmbolicStroke | log_g_Thermosinus           | Weighted median           | 9 | -0.0830 | 0.1386 | 0.5490 | -0.0181 | 0.1721 | 0.9191 | 5.7606  | 0.5680 | 158.0777 |
| CardioEmbolicStroke | log_g_Thermosinus           | Inverse variance weighted | 9 | -0.1584 | 0.1030 | 0.1242 | -0.0181 | 0.1721 | 0.9191 | 5.7606  | 0.5680 | 158.0777 |
| CardioEmbolicStroke | log_g_Thermosinus           | Simple mode               | 9 | -0.3850 | 0.2337 | 0.1382 | -0.0181 | 0.1721 | 0.9191 | 5.7606  | 0.5680 | 158.0777 |
| CardioEmbolicStroke | log_g_Thermosinus           | Weighted mode             | 9 | 0.0298  | 0.2228 | 0.8968 | -0.0181 | 0.1721 | 0.9191 | 5.7606  | 0.5680 | 158.0777 |
| CardioEmbolicStroke | log_g_Yersinia              | MR Egger                  | 9 | 0.3403  | 0.6698 | 0.6270 | -0.1360 | 0.1709 | 0.4523 | 3.2022  | 0.9210 | 208.7446 |
| CardioEmbolicStroke | log_g_Yersinia              | Weighted median           | 9 | -0.1872 | 0.1309 | 0.1527 | -0.1360 | 0.1709 | 0.4523 | 3.2022  | 0.9210 | 208.7446 |
| CardioEmbolicStroke | log_g_Yersinia              | Inverse variance weighted | 9 | -0.1864 | 0.1023 | 0.0686 | -0.1360 | 0.1709 | 0.4523 | 3.2022  | 0.9210 | 208.7446 |
| CardioEmbolicStroke | log_g_Yersinia              | Simple mode               | 9 | -0.1973 | 0.2041 | 0.3619 | -0.1360 | 0.1709 | 0.4523 | 3.2022  | 0.9210 | 208.7446 |
| CardioEmbolicStroke | log_g_Yersinia              | Weighted mode             | 9 | -0.1860 | 0.2060 | 0.3930 | -0.1360 | 0.1709 | 0.4523 | 3.2022  | 0.9210 | 208.7446 |
| CardioEmbolicStroke | log_o_Aeromonadales         | MR Egger                  | 9 | -0.6896 | 0.6741 | 0.3404 | 0.1691  | 0.1720 | 0.3582 | 6.8623  | 0.5516 | 213.2818 |
| CardioEmbolicStroke | log_o_Aeromonadales         | Weighted median           | 9 | -0.1381 | 0.1390 | 0.3206 | 0.1691  | 0.1720 | 0.3582 | 6.8623  | 0.5516 | 213.2818 |
| CardioEmbolicStroke | log_o_Aeromonadales         | Inverse variance weighted | 9 | -0.0345 | 0.1030 | 0.7374 | 0.1691  | 0.1720 | 0.3582 | 6.8623  | 0.5516 | 213.2818 |
| CardioEmbolicStroke | log_o_Aeromonadales         | Simple mode               | 9 | -0.1322 | 0.2161 | 0.5578 | 0.1691  | 0.1720 | 0.3582 | 6.8623  | 0.5516 | 213.2818 |
| CardioEmbolicStroke | log_o_Aeromonadales         | Weighted mode             | 9 | -0.1789 | 0.2023 | 0.4023 | 0.1691  | 0.1720 | 0.3582 | 6.8623  | 0.5516 | 213.2818 |
| CardioEmbolicStroke | log_o_Alteromonadales       | MR Egger                  | 9 | -0.5671 | 0.6776 | 0.4303 | 0.0881  | 0.1728 | 0.6259 | 6.1383  | 0.5237 | 71.5452  |
| CardioEmbolicStroke | log_o_Alteromonadales       | Weighted median           | 9 | -0.1566 | 0.1345 | 0.2443 | 0.0881  | 0.1728 | 0.6259 | 6.1383  | 0.5237 | 71.5452  |
| CardioEmbolicStroke | log_o_Alteromonadales       | Inverse variance weighted | 9 | -0.2257 | 0.1032 | 0.0288 | 0.0881  | 0.1728 | 0.6259 | 6.1383  | 0.5237 | 71.5452  |
| CardioEmbolicStroke | log_o_Alteromonadales       | Simple mode               | 9 | -0.0604 | 0.2195 | 0.7903 | 0.0881  | 0.1728 | 0.6259 | 6.1383  | 0.5237 | 71.5452  |
| CardioEmbolicStroke | log_o_Alteromonadales       | Weighted mode             | 9 | -0.0567 | 0.2069 | 0.7908 | 0.0881  | 0.1728 | 0.6259 | 6.1383  | 0.5237 | 71.5452  |
| CardioEmbolicStroke | log_o_Caulobacterales       | MR Egger                  | 9 | 0.6132  | 0.6817 | 0.3982 | -0.1813 | 0.1740 | 0.3320 | 7.5669  | 0.4769 | 172.1077 |

|                     |                                 |                           |   |         |        |        |         |        |        |         |        |          |
|---------------------|---------------------------------|---------------------------|---|---------|--------|--------|---------|--------|--------|---------|--------|----------|
| CardioEmbolicStroke | log_o_Caulobacterales           | Weighted median           | 9 | 0.0237  | 0.1402 | 0.8660 | -0.1813 | 0.1740 | 0.3320 | 7.5669  | 0.4769 | 172.1077 |
| CardioEmbolicStroke | log_o_Caulobacterales           | Inverse variance weighted | 9 | -0.0888 | 0.1043 | 0.3946 | -0.1813 | 0.1740 | 0.3320 | 7.5669  | 0.4769 | 172.1077 |
| CardioEmbolicStroke | log_o_Caulobacterales           | Simple mode               | 9 | 0.0587  | 0.2116 | 0.7885 | -0.1813 | 0.1740 | 0.3320 | 7.5669  | 0.4769 | 172.1077 |
| CardioEmbolicStroke | log_o_Caulobacterales           | Weighted mode             | 9 | 0.0497  | 0.1823 | 0.7920 | -0.1813 | 0.1740 | 0.3320 | 7.5669  | 0.4769 | 172.1077 |
| CardioEmbolicStroke | log_o_Chromatiales              | MR Egger                  | 9 | -0.5351 | 0.6723 | 0.4522 | 0.1480  | 0.1715 | 0.4169 | 6.8118  | 0.4487 | 163.6610 |
| CardioEmbolicStroke | log_o_Chromatiales              | Weighted median           | 9 | 0.0313  | 0.1382 | 0.8210 | 0.1480  | 0.1715 | 0.4169 | 6.8118  | 0.4487 | 163.6610 |
| CardioEmbolicStroke | log_o_Chromatiales              | Inverse variance weighted | 9 | 0.0381  | 0.1027 | 0.7105 | 0.1480  | 0.1715 | 0.4169 | 6.8118  | 0.4487 | 163.6610 |
| CardioEmbolicStroke | log_o_Chromatiales              | Simple mode               | 9 | -0.0459 | 0.2186 | 0.8388 | 0.1480  | 0.1715 | 0.4169 | 6.8118  | 0.4487 | 163.6610 |
| CardioEmbolicStroke | log_o_Chromatiales              | Weighted mode             | 9 | -0.0122 | 0.2157 | 0.9562 | 0.1480  | 0.1715 | 0.4169 | 6.8118  | 0.4487 | 163.6610 |
| CardioEmbolicStroke | log_o_Rhizobiales               | MR Egger                  | 9 | -1.0179 | 0.7347 | 0.2085 | 0.2374  | 0.1874 | 0.2458 | 10.2353 | 0.2489 | 108.7916 |
| CardioEmbolicStroke | log_o_Rhizobiales               | Weighted median           | 9 | -0.1941 | 0.1408 | 0.1680 | 0.2374  | 0.1874 | 0.2458 | 10.2353 | 0.2489 | 108.7916 |
| CardioEmbolicStroke | log_o_Rhizobiales               | Inverse variance weighted | 9 | -0.0982 | 0.1163 | 0.3988 | 0.2374  | 0.1874 | 0.2458 | 10.2353 | 0.2489 | 108.7916 |
| CardioEmbolicStroke | log_o_Rhizobiales               | Simple mode               | 9 | -0.2354 | 0.1984 | 0.2695 | 0.2374  | 0.1874 | 0.2458 | 10.2353 | 0.2489 | 108.7916 |
| CardioEmbolicStroke | log_o_Rhizobiales               | Weighted mode             | 9 | -0.2394 | 0.1925 | 0.2486 | 0.2374  | 0.1874 | 0.2458 | 10.2353 | 0.2489 | 108.7916 |
| CardioEmbolicStroke | log_o_Thermoanaerobacterales    | MR Egger                  | 9 | -0.1760 | 0.6936 | 0.8069 | 0.0252  | 0.1770 | 0.8906 | 7.1805  | 0.4103 | 162.3605 |
| CardioEmbolicStroke | log_o_Thermoanaerobacterales    | Weighted median           | 9 | -0.0459 | 0.1299 | 0.7237 | 0.0252  | 0.1770 | 0.8906 | 7.1805  | 0.4103 | 162.3605 |
| CardioEmbolicStroke | log_o_Thermoanaerobacterales    | Inverse variance weighted | 9 | -0.0783 | 0.1047 | 0.4548 | 0.0252  | 0.1770 | 0.8906 | 7.1805  | 0.4103 | 162.3605 |
| CardioEmbolicStroke | log_o_Thermoanaerobacterales    | Simple mode               | 9 | 0.0183  | 0.2156 | 0.9346 | 0.0252  | 0.1770 | 0.8906 | 7.1805  | 0.4103 | 162.3605 |
| CardioEmbolicStroke | log_o_Thermoanaerobacterales    | Weighted mode             | 9 | 0.0262  | 0.2047 | 0.9012 | 0.0252  | 0.1770 | 0.8906 | 7.1805  | 0.4103 | 162.3605 |
| CardioEmbolicStroke | log_p_Chloroflexi               | MR Egger                  | 9 | -0.2358 | 0.7013 | 0.7466 | 0.0655  | 0.1790 | 0.7251 | 7.4718  | 0.3815 | 198.8207 |
| CardioEmbolicStroke | log_p_Chloroflexi               | Weighted median           | 9 | -0.0461 | 0.1348 | 0.7326 | 0.0655  | 0.1790 | 0.7251 | 7.4718  | 0.3815 | 198.8207 |
| CardioEmbolicStroke | log_p_Chloroflexi               | Inverse variance weighted | 9 | 0.0180  | 0.1038 | 0.8626 | 0.0655  | 0.1790 | 0.7251 | 7.4718  | 0.3815 | 198.8207 |
| CardioEmbolicStroke | log_p_Chloroflexi               | Simple mode               | 9 | -0.0770 | 0.2014 | 0.7122 | 0.0655  | 0.1790 | 0.7251 | 7.4718  | 0.3815 | 198.8207 |
| CardioEmbolicStroke | log_p_Chloroflexi               | Weighted mode             | 9 | -0.0770 | 0.1835 | 0.6857 | 0.0655  | 0.1790 | 0.7251 | 7.4718  | 0.3815 | 198.8207 |
| CardioEmbolicStroke | log_p_Cyanobacteria             | MR Egger                  | 9 | -0.9509 | 0.6747 | 0.2016 | 0.2231  | 0.1721 | 0.2359 | 8.0726  | 0.4264 | 182.1266 |
| CardioEmbolicStroke | log_p_Cyanobacteria             | Weighted median           | 9 | 0.0283  | 0.1331 | 0.8313 | 0.2231  | 0.1721 | 0.2359 | 8.0726  | 0.4264 | 182.1266 |
| CardioEmbolicStroke | log_p_Cyanobacteria             | Inverse variance weighted | 9 | -0.0864 | 0.1036 | 0.4041 | 0.2231  | 0.1721 | 0.2359 | 8.0726  | 0.4264 | 182.1266 |
| CardioEmbolicStroke | log_p_Cyanobacteria             | Simple mode               | 9 | 0.0613  | 0.2082 | 0.7758 | 0.2231  | 0.1721 | 0.2359 | 8.0726  | 0.4264 | 182.1266 |
| CardioEmbolicStroke | log_p_Cyanobacteria             | Weighted mode             | 9 | 0.0583  | 0.2212 | 0.7988 | 0.2231  | 0.1721 | 0.2359 | 8.0726  | 0.4264 | 182.1266 |
| CardioEmbolicStroke | log_p_Euryarchaeota             | MR Egger                  | 9 | 0.1213  | 0.9438 | 0.9013 | -0.0095 | 0.2409 | 0.9696 | 13.5669 | 0.0594 | 102.3726 |
| CardioEmbolicStroke | log_p_Euryarchaeota             | Weighted median           | 9 | 0.1300  | 0.1445 | 0.3685 | -0.0095 | 0.2409 | 0.9696 | 13.5669 | 0.0594 | 102.3726 |
| CardioEmbolicStroke | log_p_Euryarchaeota             | Inverse variance weighted | 9 | 0.0844  | 0.1350 | 0.5318 | -0.0095 | 0.2409 | 0.9696 | 13.5669 | 0.0594 | 102.3726 |
| CardioEmbolicStroke | log_p_Euryarchaeota             | Simple mode               | 9 | 0.1701  | 0.2040 | 0.4285 | -0.0095 | 0.2409 | 0.9696 | 13.5669 | 0.0594 | 102.3726 |
| CardioEmbolicStroke | log_p_Euryarchaeota             | Weighted mode             | 9 | 0.1451  | 0.1883 | 0.4630 | -0.0095 | 0.2409 | 0.9696 | 13.5669 | 0.0594 | 102.3726 |
| CardioEmbolicStroke | log_p_Fibrobacteres             | MR Egger                  | 9 | 0.1964  | 0.6858 | 0.7829 | -0.0753 | 0.1750 | 0.6799 | 6.3525  | 0.4992 | 178.5976 |
| CardioEmbolicStroke | log_p_Fibrobacteres             | Weighted median           | 9 | -0.0291 | 0.1382 | 0.8333 | -0.0753 | 0.1750 | 0.6799 | 6.3525  | 0.4992 | 178.5976 |
| CardioEmbolicStroke | log_p_Fibrobacteres             | Inverse variance weighted | 9 | -0.0953 | 0.1048 | 0.3633 | -0.0753 | 0.1750 | 0.6799 | 6.3525  | 0.4992 | 178.5976 |
| CardioEmbolicStroke | log_p_Fibrobacteres             | Simple mode               | 9 | -0.1477 | 0.2108 | 0.5034 | -0.0753 | 0.1750 | 0.6799 | 6.3525  | 0.4992 | 178.5976 |
| CardioEmbolicStroke | log_p_Fibrobacteres             | Weighted mode             | 9 | -0.0579 | 0.1924 | 0.7713 | -0.0753 | 0.1750 | 0.6799 | 6.3525  | 0.4992 | 178.5976 |
| CardioEmbolicStroke | log_p_Tenericutes               | MR Egger                  | 9 | 0.3890  | 0.6941 | 0.5927 | -0.1402 | 0.1772 | 0.4547 | 7.3454  | 0.3938 | 142.2556 |
| CardioEmbolicStroke | log_p_Tenericutes               | Weighted median           | 9 | -0.0992 | 0.1419 | 0.4845 | -0.1402 | 0.1772 | 0.4547 | 7.3454  | 0.3938 | 142.2556 |
| CardioEmbolicStroke | log_p_Tenericutes               | Inverse variance weighted | 9 | -0.1539 | 0.1037 | 0.1378 | -0.1402 | 0.1772 | 0.4547 | 7.3454  | 0.3938 | 142.2556 |
| CardioEmbolicStroke | log_p_Tenericutes               | Simple mode               | 9 | -0.1086 | 0.2196 | 0.6342 | -0.1402 | 0.1772 | 0.4547 | 7.3454  | 0.3938 | 142.2556 |
| CardioEmbolicStroke | log_p_Tenericutes               | Weighted mode             | 9 | -0.1178 | 0.2115 | 0.5927 | -0.1402 | 0.1772 | 0.4547 | 7.3454  | 0.3938 | 142.2556 |
| CardioEmbolicStroke | log_s_Abiotrophia_defectiva     | MR Egger                  | 9 | 0.5476  | 1.0696 | 0.6244 | -0.1018 | 0.2726 | 0.7199 | 17.5940 | 0.0139 | 29.7632  |
| CardioEmbolicStroke | log_s_Abiotrophia_defectiva     | Weighted median           | 9 | -0.0900 | 0.1498 | 0.5479 | -0.1018 | 0.2726 | 0.7199 | 17.5940 | 0.0139 | 29.7632  |
| CardioEmbolicStroke | log_s_Abiotrophia_defectiva     | Inverse variance weighted | 9 | 0.1528  | 0.1536 | 0.3199 | -0.1018 | 0.2726 | 0.7199 | 17.5940 | 0.0139 | 29.7632  |
| CardioEmbolicStroke | log_s_Abiotrophia_defectiva     | Simple mode               | 9 | -0.0829 | 0.2046 | 0.6958 | -0.1018 | 0.2726 | 0.7199 | 17.5940 | 0.0139 | 29.7632  |
| CardioEmbolicStroke | log_s_Abiotrophia_defectiva     | Weighted mode             | 9 | -0.0908 | 0.1749 | 0.6176 | -0.1018 | 0.2726 | 0.7199 | 17.5940 | 0.0139 | 29.7632  |
| CardioEmbolicStroke | log_s_Achromobacter_piechaudii  | MR Egger                  | 9 | 0.1802  | 0.7898 | 0.8261 | -0.0802 | 0.2014 | 0.7023 | 9.5650  | 0.2146 | 90.6396  |
| CardioEmbolicStroke | log_s_Achromobacter_piechaudii  | Weighted median           | 9 | 0.0455  | 0.1414 | 0.7479 | -0.0802 | 0.2014 | 0.7023 | 9.5650  | 0.2146 | 90.6396  |
| CardioEmbolicStroke | log_s_Achromobacter_piechaudii  | Inverse variance weighted | 9 | -0.1307 | 0.1138 | 0.2509 | -0.0802 | 0.2014 | 0.7023 | 9.5650  | 0.2146 | 90.6396  |
| CardioEmbolicStroke | log_s_Achromobacter_piechaudii  | Simple mode               | 9 | 0.0718  | 0.2531 | 0.7840 | -0.0802 | 0.2014 | 0.7023 | 9.5650  | 0.2146 | 90.6396  |
| CardioEmbolicStroke | log_s_Achromobacter_piechaudii  | Weighted mode             | 9 | 0.0945  | 0.1913 | 0.6347 | -0.0802 | 0.2014 | 0.7023 | 9.5650  | 0.2146 | 90.6396  |
| CardioEmbolicStroke | log_s_Acidaminococcus_intestini | MR Egger                  | 9 | 0.5021  | 0.6739 | 0.4805 | -0.1528 | 0.1719 | 0.4036 | 3.7413  | 0.8797 | 293.8676 |
| CardioEmbolicStroke | log_s_Acidaminococcus_intestini | Weighted median           | 9 | -0.0764 | 0.1301 | 0.5567 | -0.1528 | 0.1719 | 0.4036 | 3.7413  | 0.8797 | 293.8676 |
| CardioEmbolicStroke | log_s_Acidaminococcus_intestini | Inverse variance weighted | 9 | -0.0898 | 0.1030 | 0.3831 | -0.1528 | 0.1719 | 0.4036 | 3.7413  | 0.8797 | 293.8676 |
| CardioEmbolicStroke | log_s_Acidaminococcus_intestini | Simple mode               | 9 | -0.0469 | 0.2185 | 0.8355 | -0.1528 | 0.1719 | 0.4036 | 3.7413  | 0.8797 | 293.8676 |
| CardioEmbolicStroke | log_s_Acidaminococcus_intestini | Weighted mode             | 9 | 0.0065  | 0.1977 | 0.9744 | -0.1528 | 0.1719 | 0.4036 | 3.7413  | 0.8797 | 293.8676 |
| CardioEmbolicStroke | log_s_Acinetobacter_baumannii   | MR Egger                  | 9 | -0.0675 | 0.6754 | 0.9232 | 0.0179  | 0.1723 | 0.9200 | 4.0768  | 0.7709 | 236.1822 |
| CardioEmbolicStroke | log_s_Acinetobacter_baumannii   | Weighted median           | 9 | 0.0544  | 0.1382 | 0.6938 | 0.0179  | 0.1723 | 0.9200 | 4.0768  | 0.7709 | 236.1822 |

|                     |                                   |                           |   |         |        |        |         |        |        |         |        |          |
|---------------------|-----------------------------------|---------------------------|---|---------|--------|--------|---------|--------|--------|---------|--------|----------|
| CardioEmbolicStroke | log_s_Acinetobacter_baumannii     | Inverse variance weighted | 9 | 0.0020  | 0.1032 | 0.9842 | 0.0179  | 0.1723 | 0.9200 | 4.0768  | 0.7709 | 236.1822 |
| CardioEmbolicStroke | log_s_Acinetobacter_baumannii     | Simple mode               | 9 | 0.0767  | 0.2206 | 0.7371 | 0.0179  | 0.1723 | 0.9200 | 4.0768  | 0.7709 | 236.1822 |
| CardioEmbolicStroke | log_s_Acinetobacter_baumannii     | Weighted mode             | 9 | 0.0946  | 0.1995 | 0.6481 | 0.0179  | 0.1723 | 0.9200 | 4.0768  | 0.7709 | 236.1822 |
| CardioEmbolicStroke | log_s_Acinetobacter_haemolyticus  | MR Egger                  | 9 | 0.4166  | 0.8570 | 0.6417 | -0.0962 | 0.2185 | 0.6730 | 11.2740 | 0.1271 | 83.9020  |
| CardioEmbolicStroke | log_s_Acinetobacter_haemolyticus  | Weighted median           | 9 | 0.1534  | 0.1468 | 0.2960 | -0.0962 | 0.2185 | 0.6730 | 11.2740 | 0.1271 | 83.9020  |
| CardioEmbolicStroke | log_s_Acinetobacter_haemolyticus  | Inverse variance weighted | 9 | 0.0437  | 0.1239 | 0.7243 | -0.0962 | 0.2185 | 0.6730 | 11.2740 | 0.1271 | 83.9020  |
| CardioEmbolicStroke | log_s_Acinetobacter_haemolyticus  | Simple mode               | 9 | 0.1303  | 0.2573 | 0.6261 | -0.0962 | 0.2185 | 0.6730 | 11.2740 | 0.1271 | 83.9020  |
| CardioEmbolicStroke | log_s_Acinetobacter_haemolyticus  | Weighted mode             | 9 | 0.1733  | 0.2501 | 0.5080 | -0.0962 | 0.2185 | 0.6730 | 11.2740 | 0.1271 | 83.9020  |
| CardioEmbolicStroke | log_s_Aggregatibacter_aphrophilus | MR Egger                  | 9 | 1.2948  | 0.7332 | 0.1208 | -0.3336 | 0.1871 | 0.1177 | 11.7779 | 0.1614 | 98.5454  |
| CardioEmbolicStroke | log_s_Aggregatibacter_aphrophilus | Weighted median           | 9 | -0.0436 | 0.1499 | 0.7713 | -0.3336 | 0.1871 | 0.1177 | 11.7779 | 0.1614 | 98.5454  |
| CardioEmbolicStroke | log_s_Aggregatibacter_aphrophilus | Inverse variance weighted | 9 | 0.0025  | 0.1263 | 0.9842 | -0.3336 | 0.1871 | 0.1177 | 11.7779 | 0.1614 | 98.5454  |
| CardioEmbolicStroke | log_s_Aggregatibacter_aphrophilus | Simple mode               | 9 | -0.0334 | 0.2542 | 0.8988 | -0.3336 | 0.1871 | 0.1177 | 11.7779 | 0.1614 | 98.5454  |
| CardioEmbolicStroke | log_s_Aggregatibacter_aphrophilus | Weighted mode             | 9 | -0.0518 | 0.2469 | 0.8390 | -0.3336 | 0.1871 | 0.1177 | 11.7779 | 0.1614 | 98.5454  |
| CardioEmbolicStroke | log_s_Bifidobacterium_angulatum   | MR Egger                  | 9 | 0.1382  | 0.8019 | 0.8680 | -0.0168 | 0.2046 | 0.9369 | 9.3411  | 0.2291 | 151.4429 |
| CardioEmbolicStroke | log_s_Bifidobacterium_angulatum   | Weighted median           | 9 | -0.0189 | 0.1364 | 0.8895 | -0.0168 | 0.2046 | 0.9369 | 9.3411  | 0.2291 | 151.4429 |
| CardioEmbolicStroke | log_s_Bifidobacterium_angulatum   | Inverse variance weighted | 9 | 0.0732  | 0.1146 | 0.5231 | -0.0168 | 0.2046 | 0.9369 | 9.3411  | 0.2291 | 151.4429 |
| CardioEmbolicStroke | log_s_Bifidobacterium_angulatum   | Simple mode               | 9 | -0.0898 | 0.2222 | 0.6969 | -0.0168 | 0.2046 | 0.9369 | 9.3411  | 0.2291 | 151.4429 |
| CardioEmbolicStroke | log_s_Bifidobacterium_angulatum   | Weighted mode             | 9 | -0.0469 | 0.1962 | 0.8172 | -0.0168 | 0.2046 | 0.9369 | 9.3411  | 0.2291 | 151.4429 |
| CardioEmbolicStroke | log_s_Bifidobacterium_dentium     | MR Egger                  | 9 | 0.7172  | 0.6885 | 0.3322 | -0.2003 | 0.1757 | 0.2918 | 6.3459  | 0.6085 | 225.3265 |
| CardioEmbolicStroke | log_s_Bifidobacterium_dentium     | Weighted median           | 9 | 0.0574  | 0.1410 | 0.6842 | -0.2003 | 0.1757 | 0.2918 | 6.3459  | 0.6085 | 225.3265 |
| CardioEmbolicStroke | log_s_Bifidobacterium_dentium     | Inverse variance weighted | 9 | -0.0585 | 0.1052 | 0.5783 | -0.2003 | 0.1757 | 0.2918 | 6.3459  | 0.6085 | 225.3265 |
| CardioEmbolicStroke | log_s_Bifidobacterium_dentium     | Simple mode               | 9 | 0.0671  | 0.1909 | 0.7342 | -0.2003 | 0.1757 | 0.2918 | 6.3459  | 0.6085 | 225.3265 |
| CardioEmbolicStroke | log_s_Bifidobacterium_dentium     | Weighted mode             | 9 | 0.0728  | 0.1956 | 0.7192 | -0.2003 | 0.1757 | 0.2918 | 6.3459  | 0.6085 | 225.3265 |
| CardioEmbolicStroke | log_s_Brucella_melitensis         | MR Egger                  | 9 | -0.0690 | 0.6758 | 0.9215 | -0.0282 | 0.1724 | 0.8745 | 6.1189  | 0.5259 | 116.9002 |
| CardioEmbolicStroke | log_s_Brucella_melitensis         | Weighted median           | 9 | -0.2311 | 0.1374 | 0.0926 | -0.0282 | 0.1724 | 0.8745 | 6.1189  | 0.5259 | 116.9002 |
| CardioEmbolicStroke | log_s_Brucella_melitensis         | Inverse variance weighted | 9 | -0.1785 | 0.1031 | 0.0834 | -0.0282 | 0.1724 | 0.8745 | 6.1189  | 0.5259 | 116.9002 |
| CardioEmbolicStroke | log_s_Brucella_melitensis         | Simple mode               | 9 | -0.2531 | 0.2441 | 0.3302 | -0.0282 | 0.1724 | 0.8745 | 6.1189  | 0.5259 | 116.9002 |
| CardioEmbolicStroke | log_s_Brucella_melitensis         | Weighted mode             | 9 | -0.2473 | 0.2358 | 0.3250 | -0.0282 | 0.1724 | 0.8745 | 6.1189  | 0.5259 | 116.9002 |
| CardioEmbolicStroke | log_s_Burkholderia_multivorans    | MR Egger                  | 9 | -0.3093 | 0.6736 | 0.6600 | 0.0366  | 0.1718 | 0.8375 | 4.6650  | 0.7008 | 142.6850 |
| CardioEmbolicStroke | log_s_Burkholderia_multivorans    | Weighted median           | 9 | -0.1148 | 0.1361 | 0.3988 | 0.0366  | 0.1718 | 0.8375 | 4.6650  | 0.7008 | 142.6850 |
| CardioEmbolicStroke | log_s_Burkholderia_multivorans    | Inverse variance weighted | 9 | -0.1676 | 0.1028 | 0.1028 | 0.0366  | 0.1718 | 0.8375 | 4.6650  | 0.7008 | 142.6850 |
| CardioEmbolicStroke | log_s_Burkholderia_multivorans    | Simple mode               | 9 | -0.1117 | 0.1929 | 0.5784 | 0.0366  | 0.1718 | 0.8375 | 4.6650  | 0.7008 | 142.6850 |
| CardioEmbolicStroke | log_s_Burkholderia_multivorans    | Weighted mode             | 9 | -0.0969 | 0.1955 | 0.6334 | 0.0366  | 0.1718 | 0.8375 | 4.6650  | 0.7008 | 142.6850 |
| CardioEmbolicStroke | log_s_Campylobacter_conciscus     | MR Egger                  | 9 | 1.3341  | 0.9144 | 0.1879 | -0.3380 | 0.2332 | 0.1905 | 16.5813 | 0.0348 | 59.0934  |
| CardioEmbolicStroke | log_s_Campylobacter_conciscus     | Weighted median           | 9 | 0.0615  | 0.1522 | 0.6864 | -0.3380 | 0.2332 | 0.1905 | 16.5813 | 0.0348 | 59.0934  |
| CardioEmbolicStroke | log_s_Campylobacter_conciscus     | Inverse variance weighted | 9 | 0.0245  | 0.1488 | 0.8694 | -0.3380 | 0.2332 | 0.1905 | 16.5813 | 0.0348 | 59.0934  |
| CardioEmbolicStroke | log_s_Campylobacter_conciscus     | Simple mode               | 9 | 0.1145  | 0.2453 | 0.6530 | -0.3380 | 0.2332 | 0.1905 | 16.5813 | 0.0348 | 59.0934  |
| CardioEmbolicStroke | log_s_Campylobacter_conciscus     | Weighted mode             | 9 | 0.1321  | 0.2264 | 0.5757 | -0.3380 | 0.2332 | 0.1905 | 16.5813 | 0.0348 | 59.0934  |
| CardioEmbolicStroke | log_s_Citrobacter_rodentium       | MR Egger                  | 9 | 0.4151  | 0.7022 | 0.5730 | -0.1237 | 0.1792 | 0.5121 | 7.6334  | 0.3660 | 181.0020 |
| CardioEmbolicStroke | log_s_Citrobacter_rodentium       | Weighted median           | 9 | 0.0320  | 0.1348 | 0.8122 | -0.1237 | 0.1792 | 0.5121 | 7.6334  | 0.3660 | 181.0020 |
| CardioEmbolicStroke | log_s_Citrobacter_rodentium       | Inverse variance weighted | 9 | -0.0641 | 0.1038 | 0.5370 | -0.1237 | 0.1792 | 0.5121 | 7.6334  | 0.3660 | 181.0020 |
| CardioEmbolicStroke | log_s_Citrobacter_rodentium       | Simple mode               | 9 | 0.0829  | 0.2244 | 0.7214 | -0.1237 | 0.1792 | 0.5121 | 7.6334  | 0.3660 | 181.0020 |
| CardioEmbolicStroke | log_s_Citrobacter_rodentium       | Weighted mode             | 9 | 0.0988  | 0.2062 | 0.6446 | -0.1237 | 0.1792 | 0.5121 | 7.6334  | 0.3660 | 181.0020 |
| CardioEmbolicStroke | log_s_Clostridium_butyrlicum      | MR Egger                  | 9 | -0.1366 | 0.9046 | 0.8842 | 0.0813  | 0.2308 | 0.7351 | 12.7000 | 0.0798 | 99.7941  |
| CardioEmbolicStroke | log_s_Clostridium_butyrlicum      | Weighted median           | 9 | 0.1627  | 0.1471 | 0.2689 | 0.0813  | 0.2308 | 0.7351 | 12.7000 | 0.0798 | 99.7941  |
| CardioEmbolicStroke | log_s_Clostridium_butyrlicum      | Inverse variance weighted | 9 | 0.1782  | 0.1306 | 0.1723 | 0.0813  | 0.2308 | 0.7351 | 12.7000 | 0.0798 | 99.7941  |
| CardioEmbolicStroke | log_s_Clostridium_butyrlicum      | Simple mode               | 9 | 0.0917  | 0.2133 | 0.6787 | 0.0813  | 0.2308 | 0.7351 | 12.7000 | 0.0798 | 99.7941  |
| CardioEmbolicStroke | log_s_Clostridium_butyrlicum      | Weighted mode             | 9 | 0.1416  | 0.1989 | 0.4966 | 0.0813  | 0.2308 | 0.7351 | 12.7000 | 0.0798 | 99.7941  |
| CardioEmbolicStroke | log_s_Clostridium_hiranonis       | MR Egger                  | 9 | 0.7546  | 0.6765 | 0.3015 | -0.1981 | 0.1726 | 0.2888 | 4.4873  | 0.8107 | NA       |
| CardioEmbolicStroke | log_s_Clostridium_hiranonis       | Weighted median           | 9 | -0.0046 | 0.1308 | 0.9717 | -0.1981 | 0.1726 | 0.2888 | 4.4873  | 0.8107 | NA       |
| CardioEmbolicStroke | log_s_Clostridium_hiranonis       | Inverse variance weighted | 9 | -0.0127 | 0.1034 | 0.9024 | -0.1981 | 0.1726 | 0.2888 | 4.4873  | 0.8107 | NA       |
| CardioEmbolicStroke | log_s_Clostridium_hiranonis       | Simple mode               | 9 | -0.0761 | 0.2119 | 0.7286 | -0.1981 | 0.1726 | 0.2888 | 4.4873  | 0.8107 | NA       |
| CardioEmbolicStroke | log_s_Clostridium_hiranonis       | Weighted mode             | 9 | -0.0614 | 0.2062 | 0.7735 | -0.1981 | 0.1726 | 0.2888 | 4.4873  | 0.8107 | NA       |
| CardioEmbolicStroke | log_s_Clostridium_hylemonae       | MR Egger                  | 9 | 1.2573  | 0.6774 | 0.1058 | -0.3458 | 0.1728 | 0.0855 | 6.6990  | 0.5694 | 193.9601 |
| CardioEmbolicStroke | log_s_Clostridium_hylemonae       | Weighted median           | 9 | -0.0452 | 0.1422 | 0.7509 | -0.3458 | 0.1728 | 0.0855 | 6.6990  | 0.5694 | 193.9601 |
| CardioEmbolicStroke | log_s_Clostridium_hylemonae       | Inverse variance weighted | 9 | -0.0821 | 0.1035 | 0.4278 | -0.3458 | 0.1728 | 0.0855 | 6.6990  | 0.5694 | 193.9601 |
| CardioEmbolicStroke | log_s_Clostridium_hylemonae       | Simple mode               | 9 | -0.0110 | 0.2130 | 0.9600 | -0.3458 | 0.1728 | 0.0855 | 6.6990  | 0.5694 | 193.9601 |
| CardioEmbolicStroke | log_s_Clostridium_hylemonae       | Weighted mode             | 9 | 0.0233  | 0.1903 | 0.9057 | -0.3458 | 0.1728 | 0.0855 | 6.6990  | 0.5694 | 193.9601 |
| CardioEmbolicStroke | log_s_Clostridium_kluyveri        | MR Egger                  | 9 | 0.7257  | 0.7789 | 0.3825 | -0.1956 | 0.1987 | 0.3577 | 10.7190 | 0.2181 | 127.5486 |
| CardioEmbolicStroke | log_s_Clostridium_kluyveri        | Weighted median           | 9 | -0.0911 | 0.1449 | 0.5294 | -0.1956 | 0.1987 | 0.3577 | 10.7190 | 0.2181 | 127.5486 |
| CardioEmbolicStroke | log_s_Clostridium_kluyveri        | Inverse variance weighted | 9 | -0.0321 | 0.1188 | 0.7872 | -0.1956 | 0.1987 | 0.3577 | 10.7190 | 0.2181 | 127.5486 |

|                     |                                        |                           |   |         |        |        |         |        |        |         |        |          |
|---------------------|----------------------------------------|---------------------------|---|---------|--------|--------|---------|--------|--------|---------|--------|----------|
| CardioEmbolicStroke | log_s_Clostridium_kluyveri             | Simple mode               | 9 | -0.1598 | 0.2454 | 0.5334 | -0.1956 | 0.1987 | 0.3577 | 10.7190 | 0.2181 | 127.5486 |
| CardioEmbolicStroke | log_s_Clostridium_kluyveri             | Weighted mode             | 9 | -0.1374 | 0.2242 | 0.5571 | -0.1956 | 0.1987 | 0.3577 | 10.7190 | 0.2181 | 127.5486 |
| CardioEmbolicStroke | log_s_Clostridium_phytofermentans      | MR Egger                  | 9 | 1.0519  | 0.6780 | 0.1647 | -0.2727 | 0.1729 | 0.1588 | 8.1502  | 0.4189 | 129.2283 |
| CardioEmbolicStroke | log_s_Clostridium_phytofermentans      | Weighted median           | 9 | -0.0795 | 0.1380 | 0.5645 | -0.2727 | 0.1729 | 0.1588 | 8.1502  | 0.4189 | 129.2283 |
| CardioEmbolicStroke | log_s_Clostridium_phytofermentans      | Inverse variance weighted | 9 | -0.0048 | 0.1045 | 0.9633 | -0.2727 | 0.1729 | 0.1588 | 8.1502  | 0.4189 | 129.2283 |
| CardioEmbolicStroke | log_s_Clostridium_phytofermentans      | Simple mode               | 9 | -0.1332 | 0.2571 | 0.6185 | -0.2727 | 0.1729 | 0.1588 | 8.1502  | 0.4189 | 129.2283 |
| CardioEmbolicStroke | log_s_Clostridium_phytofermentans      | Weighted mode             | 9 | -0.1260 | 0.2481 | 0.6254 | -0.2727 | 0.1729 | 0.1588 | 8.1502  | 0.4189 | 129.2283 |
| CardioEmbolicStroke | log_s_Collinsella_stercoris            | MR Egger                  | 9 | 0.2611  | 0.6761 | 0.7108 | -0.0663 | 0.1725 | 0.7119 | 4.2913  | 0.7457 | 280.9677 |
| CardioEmbolicStroke | log_s_Collinsella_stercoris            | Weighted median           | 9 | 0.0074  | 0.1356 | 0.9567 | -0.0663 | 0.1725 | 0.7119 | 4.2913  | 0.7457 | 280.9677 |
| CardioEmbolicStroke | log_s_Collinsella_stercoris            | Inverse variance weighted | 9 | 0.0041  | 0.1033 | 0.9685 | -0.0663 | 0.1725 | 0.7119 | 4.2913  | 0.7457 | 280.9677 |
| CardioEmbolicStroke | log_s_Collinsella_stercoris            | Simple mode               | 9 | -0.1412 | 0.2126 | 0.5254 | -0.0663 | 0.1725 | 0.7119 | 4.2913  | 0.7457 | 280.9677 |
| CardioEmbolicStroke | log_s_Collinsella_stercoris            | Weighted mode             | 9 | -0.1291 | 0.2124 | 0.5600 | -0.0663 | 0.1725 | 0.7119 | 4.2913  | 0.7457 | 280.9677 |
| CardioEmbolicStroke | log_s_Comamonas_testosteroni           | MR Egger                  | 9 | -0.0617 | 0.9142 | 0.9481 | 0.0360  | 0.2331 | 0.8816 | 12.8187 | 0.0767 | 66.4335  |
| CardioEmbolicStroke | log_s_Comamonas_testosteroni           | Weighted median           | 9 | 0.1687  | 0.1445 | 0.2430 | 0.0360  | 0.2331 | 0.8816 | 12.8187 | 0.0767 | 66.4335  |
| CardioEmbolicStroke | log_s_Comamonas_testosteroni           | Inverse variance weighted | 9 | 0.0779  | 0.1306 | 0.5507 | 0.0360  | 0.2331 | 0.8816 | 12.8187 | 0.0767 | 66.4335  |
| CardioEmbolicStroke | log_s_Comamonas_testosteroni           | Simple mode               | 9 | 0.1697  | 0.2312 | 0.4840 | 0.0360  | 0.2331 | 0.8816 | 12.8187 | 0.0767 | 66.4335  |
| CardioEmbolicStroke | log_s_Comamonas_testosteroni           | Weighted mode             | 9 | 0.2276  | 0.2013 | 0.2910 | 0.0360  | 0.2331 | 0.8816 | 12.8187 | 0.0767 | 66.4335  |
| CardioEmbolicStroke | log_s_Corynebacterium_glucuronolyticum | MR Egger                  | 9 | 0.1776  | 0.6918 | 0.8047 | -0.0461 | 0.1765 | 0.8016 | 7.2924  | 0.3991 | 129.5599 |
| CardioEmbolicStroke | log_s_Corynebacterium_glucuronolyticum | Weighted median           | 9 | -0.1131 | 0.1363 | 0.4067 | -0.0461 | 0.1765 | 0.8016 | 7.2924  | 0.3991 | 129.5599 |
| CardioEmbolicStroke | log_s_Corynebacterium_glucuronolyticum | Inverse variance weighted | 9 | -0.0008 | 0.1035 | 0.9937 | -0.0461 | 0.1765 | 0.8016 | 7.2924  | 0.3991 | 129.5599 |
| CardioEmbolicStroke | log_s_Corynebacterium_glucuronolyticum | Simple mode               | 9 | -0.1486 | 0.2086 | 0.4965 | -0.0461 | 0.1765 | 0.8016 | 7.2924  | 0.3991 | 129.5599 |
| CardioEmbolicStroke | log_s_Corynebacterium_glucuronolyticum | Weighted mode             | 9 | -0.1486 | 0.1984 | 0.4754 | -0.0461 | 0.1765 | 0.8016 | 7.2924  | 0.3991 | 129.5599 |
| CardioEmbolicStroke | log_s_Desulfovibrio_alaskensis         | MR Egger                  | 9 | -1.1539 | 0.6759 | 0.1316 | 0.2632  | 0.1723 | 0.1705 | 6.6950  | 0.5699 | 86.5478  |
| CardioEmbolicStroke | log_s_Desulfovibrio_alaskensis         | Weighted median           | 9 | -0.1159 | 0.1381 | 0.4014 | 0.2632  | 0.1723 | 0.1705 | 6.6950  | 0.5699 | 86.5478  |
| CardioEmbolicStroke | log_s_Desulfovibrio_alaskensis         | Inverse variance weighted | 9 | -0.1336 | 0.1029 | 0.1943 | 0.2632  | 0.1723 | 0.1705 | 6.6950  | 0.5699 | 86.5478  |
| CardioEmbolicStroke | log_s_Desulfovibrio_alaskensis         | Simple mode               | 9 | -0.1589 | 0.2051 | 0.4607 | 0.2632  | 0.1723 | 0.1705 | 6.6950  | 0.5699 | 86.5478  |
| CardioEmbolicStroke | log_s_Desulfovibrio_alaskensis         | Weighted mode             | 9 | -0.1162 | 0.2049 | 0.5862 | 0.2632  | 0.1723 | 0.1705 | 6.6950  | 0.5699 | 86.5478  |
| CardioEmbolicStroke | log_s_Enterobacter_asburiae            | MR Egger                  | 9 | -0.1635 | 0.6758 | 0.8158 | 0.0205  | 0.1724 | 0.9088 | 7.0426  | 0.4245 | 126.9238 |
| CardioEmbolicStroke | log_s_Enterobacter_asburiae            | Weighted median           | 9 | -0.0485 | 0.1356 | 0.7206 | 0.0205  | 0.1724 | 0.9088 | 7.0426  | 0.4245 | 126.9238 |
| CardioEmbolicStroke | log_s_Enterobacter_asburiae            | Inverse variance weighted | 9 | -0.0842 | 0.1028 | 0.4130 | 0.0205  | 0.1724 | 0.9088 | 7.0426  | 0.4245 | 126.9238 |
| CardioEmbolicStroke | log_s_Enterobacter_asburiae            | Simple mode               | 9 | -0.1174 | 0.2156 | 0.6009 | 0.0205  | 0.1724 | 0.9088 | 7.0426  | 0.4245 | 126.9238 |
| CardioEmbolicStroke | log_s_Enterobacter_asburiae            | Weighted mode             | 9 | -0.0318 | 0.1909 | 0.8718 | 0.0205  | 0.1724 | 0.9088 | 7.0426  | 0.4245 | 126.9238 |
| CardioEmbolicStroke | log_s_Enterobacter_cancerogenus        | MR Egger                  | 9 | -0.0737 | 0.9426 | 0.9399 | -0.0277 | 0.2404 | 0.9114 | 13.6204 | 0.0584 | 53.6598  |
| CardioEmbolicStroke | log_s_Enterobacter_cancerogenus        | Weighted median           | 9 | -0.0531 | 0.1512 | 0.7254 | -0.0277 | 0.2404 | 0.9114 | 13.6204 | 0.0584 | 53.6598  |
| CardioEmbolicStroke | log_s_Enterobacter_cancerogenus        | Inverse variance weighted | 9 | -0.1812 | 0.1345 | 0.1779 | -0.0277 | 0.2404 | 0.9114 | 13.6204 | 0.0584 | 53.6598  |
| CardioEmbolicStroke | log_s_Enterobacter_cancerogenus        | Simple mode               | 9 | 0.0654  | 0.2704 | 0.8150 | -0.0277 | 0.2404 | 0.9114 | 13.6204 | 0.0584 | 53.6598  |
| CardioEmbolicStroke | log_s_Enterobacter_cancerogenus        | Weighted mode             | 9 | 0.0803  | 0.1906 | 0.6845 | -0.0277 | 0.2404 | 0.9114 | 13.6204 | 0.0584 | 53.6598  |
| CardioEmbolicStroke | log_s_Escherichia_albertii             | MR Egger                  | 9 | 0.2008  | 0.7304 | 0.7914 | -0.0607 | 0.1864 | 0.7543 | 8.2621  | 0.3101 | 181.4276 |
| CardioEmbolicStroke | log_s_Escherichia_albertii             | Weighted median           | 9 | -0.0311 | 0.1393 | 0.8231 | -0.0607 | 0.1864 | 0.7543 | 8.2621  | 0.3101 | 181.4276 |
| CardioEmbolicStroke | log_s_Escherichia_albertii             | Inverse variance weighted | 9 | -0.0342 | 0.1052 | 0.7449 | -0.0607 | 0.1864 | 0.7543 | 8.2621  | 0.3101 | 181.4276 |
| CardioEmbolicStroke | log_s_Escherichia_albertii             | Simple mode               | 9 | -0.0380 | 0.1987 | 0.8530 | -0.0607 | 0.1864 | 0.7543 | 8.2621  | 0.3101 | 181.4276 |
| CardioEmbolicStroke | log_s_Escherichia_albertii             | Weighted mode             | 9 | -0.0380 | 0.1768 | 0.8351 | -0.0607 | 0.1864 | 0.7543 | 8.2621  | 0.3101 | 181.4276 |
| CardioEmbolicStroke | log_s_Eubacterium_cellulosolvens       | MR Egger                  | 9 | 1.8806  | 0.6751 | 0.0271 | -0.4792 | 0.1722 | 0.0272 | 10.1416 | 0.2552 | 75.9429  |
| CardioEmbolicStroke | log_s_Eubacterium_cellulosolvens       | Weighted median           | 9 | 0.0112  | 0.1422 | 0.9371 | -0.4792 | 0.1722 | 0.0272 | 10.1416 | 0.2552 | 75.9429  |
| CardioEmbolicStroke | log_s_Eubacterium_cellulosolvens       | Inverse variance weighted | 9 | 0.0236  | 0.1159 | 0.8384 | -0.4792 | 0.1722 | 0.0272 | 10.1416 | 0.2552 | 75.9429  |
| CardioEmbolicStroke | log_s_Eubacterium_cellulosolvens       | Simple mode               | 9 | -0.0784 | 0.2219 | 0.7331 | -0.4792 | 0.1722 | 0.0272 | 10.1416 | 0.2552 | 75.9429  |
| CardioEmbolicStroke | log_s_Eubacterium_cellulosolvens       | Weighted mode             | 9 | -0.0155 | 0.2109 | 0.9431 | -0.4792 | 0.1722 | 0.0272 | 10.1416 | 0.2552 | 75.9429  |
| CardioEmbolicStroke | log_s_Filifactor_alocis                | MR Egger                  | 9 | 0.2442  | 0.8676 | 0.7865 | -0.0364 | 0.2213 | 0.8742 | 11.6961 | 0.1110 | 106.3026 |
| CardioEmbolicStroke | log_s_Filifactor_alocis                | Weighted median           | 9 | 0.1567  | 0.1426 | 0.2717 | -0.0364 | 0.2213 | 0.8742 | 11.6961 | 0.1110 | 106.3026 |
| CardioEmbolicStroke | log_s_Filifactor_alocis                | Inverse variance weighted | 9 | 0.1034  | 0.1243 | 0.4056 | -0.0364 | 0.2213 | 0.8742 | 11.6961 | 0.1110 | 106.3026 |
| CardioEmbolicStroke | log_s_Filifactor_alocis                | Simple mode               | 9 | 0.2038  | 0.2054 | 0.3503 | -0.0364 | 0.2213 | 0.8742 | 11.6961 | 0.1110 | 106.3026 |
| CardioEmbolicStroke | log_s_Filifactor_alocis                | Weighted mode             | 9 | 0.1716  | 0.1796 | 0.3672 | -0.0364 | 0.2213 | 0.8742 | 11.6961 | 0.1110 | 106.3026 |
| CardioEmbolicStroke | log_s_Fusobacterium_gonidiaformans     | MR Egger                  | 9 | -0.4238 | 0.7802 | 0.6038 | 0.1168  | 0.1990 | 0.5756 | 9.4019  | 0.2251 | 123.6044 |
| CardioEmbolicStroke | log_s_Fusobacterium_gonidiaformans     | Weighted median           | 9 | -0.0073 | 0.1395 | 0.9585 | 0.1168  | 0.1990 | 0.5756 | 9.4019  | 0.2251 | 123.6044 |
| CardioEmbolicStroke | log_s_Fusobacterium_gonidiaformans     | Inverse variance weighted | 9 | 0.0288  | 0.1142 | 0.8008 | 0.1168  | 0.1990 | 0.5756 | 9.4019  | 0.2251 | 123.6044 |
| CardioEmbolicStroke | log_s_Fusobacterium_gonidiaformans     | Simple mode               | 9 | -0.0358 | 0.2344 | 0.8824 | 0.1168  | 0.1990 | 0.5756 | 9.4019  | 0.2251 | 123.6044 |
| CardioEmbolicStroke | log_s_Fusobacterium_gonidiaformans     | Weighted mode             | 9 | -0.0472 | 0.2114 | 0.8291 | 0.1168  | 0.1990 | 0.5756 | 9.4019  | 0.2251 | 123.6044 |
| CardioEmbolicStroke | log_s_Fusobacterium_nucleatum          | MR Egger                  | 9 | 1.0233  | 0.6817 | 0.1770 | -0.2308 | 0.1738 | 0.2259 | 7.7551  | 0.4577 | 81.5318  |
| CardioEmbolicStroke | log_s_Fusobacterium_nucleatum          | Weighted median           | 9 | 0.1256  | 0.1433 | 0.3807 | -0.2308 | 0.1738 | 0.2259 | 7.7551  | 0.4577 | 81.5318  |
| CardioEmbolicStroke | log_s_Fusobacterium_nucleatum          | Inverse variance weighted | 9 | 0.1286  | 0.1038 | 0.2152 | -0.2308 | 0.1738 | 0.2259 | 7.7551  | 0.4577 | 81.5318  |
| CardioEmbolicStroke | log_s_Fusobacterium_nucleatum          | Simple mode               | 9 | -0.0905 | 0.2084 | 0.6755 | -0.2308 | 0.1738 | 0.2259 | 7.7551  | 0.4577 | 81.5318  |

|                     |                                   |                           |   |         |        |        |         |        |        |         |        |          |
|---------------------|-----------------------------------|---------------------------|---|---------|--------|--------|---------|--------|--------|---------|--------|----------|
| CardioEmbolicStroke | log_s_Fusobacterium_nucleatum     | Weighted mode             | 9 | -0.0659 | 0.2100 | 0.7617 | -0.2308 | 0.1738 | 0.2259 | 7.7551  | 0.4577 | 81.5318  |
| CardioEmbolicStroke | log_s_Fusobacterium_periodonticum | MR Egger                  | 9 | 1.7231  | 0.6772 | 0.0384 | -0.4333 | 0.1727 | 0.0405 | 7.9237  | 0.4410 | 125.7792 |
| CardioEmbolicStroke | log_s_Fusobacterium_periodonticum | Weighted median           | 9 | 0.0215  | 0.1447 | 0.8821 | -0.4333 | 0.1727 | 0.0405 | 7.9237  | 0.4410 | 125.7792 |
| CardioEmbolicStroke | log_s_Fusobacterium_periodonticum | Inverse variance weighted | 9 | 0.0442  | 0.1033 | 0.6688 | -0.4333 | 0.1727 | 0.0405 | 7.9237  | 0.4410 | 125.7792 |
| CardioEmbolicStroke | log_s_Fusobacterium_periodonticum | Simple mode               | 9 | -0.0940 | 0.2374 | 0.7025 | -0.4333 | 0.1727 | 0.0405 | 7.9237  | 0.4410 | 125.7792 |
| CardioEmbolicStroke | log_s_Fusobacterium_periodonticum | Weighted mode             | 9 | -0.0743 | 0.2448 | 0.7693 | -0.4333 | 0.1727 | 0.0405 | 7.9237  | 0.4410 | 125.7792 |
| CardioEmbolicStroke | log_s_Fusobacterium_ulcerans      | MR Egger                  | 9 | -0.1879 | 0.6827 | 0.7911 | 0.0856  | 0.1742 | 0.6382 | 3.9446  | 0.7861 | 207.5172 |
| CardioEmbolicStroke | log_s_Fusobacterium_ulcerans      | Weighted median           | 9 | 0.0545  | 0.1365 | 0.6898 | 0.0856  | 0.1742 | 0.6382 | 3.9446  | 0.7861 | 207.5172 |
| CardioEmbolicStroke | log_s_Fusobacterium_ulcerans      | Inverse variance weighted | 9 | 0.1436  | 0.1044 | 0.1687 | 0.0856  | 0.1742 | 0.6382 | 3.9446  | 0.7861 | 207.5172 |
| CardioEmbolicStroke | log_s_Fusobacterium_ulcerans      | Simple mode               | 9 | 0.0794  | 0.1919 | 0.6899 | 0.0856  | 0.1742 | 0.6382 | 3.9446  | 0.7861 | 207.5172 |
| CardioEmbolicStroke | log_s_Fusobacterium_ulcerans      | Weighted mode             | 9 | 0.0611  | 0.1871 | 0.7525 | 0.0856  | 0.1742 | 0.6382 | 3.9446  | 0.7861 | 207.5172 |
| CardioEmbolicStroke | log_s_Fusobacterium_varium        | MR Egger                  | 9 | 0.2811  | 0.7145 | 0.7057 | -0.0201 | 0.1823 | 0.9154 | 7.6933  | 0.3604 | 96.0555  |
| CardioEmbolicStroke | log_s_Fusobacterium_varium        | Weighted median           | 9 | 0.1888  | 0.1415 | 0.1822 | -0.0201 | 0.1823 | 0.9154 | 7.6933  | 0.3604 | 96.0555  |
| CardioEmbolicStroke | log_s_Fusobacterium_varium        | Inverse variance weighted | 9 | 0.2033  | 0.1040 | 0.0507 | -0.0201 | 0.1823 | 0.9154 | 7.6933  | 0.3604 | 96.0555  |
| CardioEmbolicStroke | log_s_Fusobacterium_varium        | Simple mode               | 9 | 0.1667  | 0.2279 | 0.4854 | -0.0201 | 0.1823 | 0.9154 | 7.6933  | 0.3604 | 96.0555  |
| CardioEmbolicStroke | log_s_Fusobacterium_varium        | Weighted mode             | 9 | 0.1553  | 0.1906 | 0.4389 | -0.0201 | 0.1823 | 0.9154 | 7.6933  | 0.3604 | 96.0555  |
| CardioEmbolicStroke | log_s_Gemella_haemolysans         | MR Egger                  | 9 | -0.1519 | 0.7395 | 0.8431 | 0.0144  | 0.1886 | 0.9413 | 8.4425  | 0.2952 | 152.1746 |
| CardioEmbolicStroke | log_s_Gemella_haemolysans         | Weighted median           | 9 | -0.1965 | 0.1375 | 0.1531 | 0.0144  | 0.1886 | 0.9413 | 8.4425  | 0.2952 | 152.1746 |
| CardioEmbolicStroke | log_s_Gemella_haemolysans         | Inverse variance weighted | 9 | -0.0962 | 0.1057 | 0.3630 | 0.0144  | 0.1886 | 0.9413 | 8.4425  | 0.2952 | 152.1746 |
| CardioEmbolicStroke | log_s_Gemella_haemolysans         | Simple mode               | 9 | -0.2380 | 0.2255 | 0.3220 | 0.0144  | 0.1886 | 0.9413 | 8.4425  | 0.2952 | 152.1746 |
| CardioEmbolicStroke | log_s_Gemella_haemolysans         | Weighted mode             | 9 | -0.2464 | 0.1918 | 0.2347 | 0.0144  | 0.1886 | 0.9413 | 8.4425  | 0.2952 | 152.1746 |
| CardioEmbolicStroke | log_s_Lactobacillus_amylovorus    | MR Egger                  | 9 | 0.4821  | 0.7166 | 0.5227 | -0.0983 | 0.1829 | 0.6074 | 7.7462  | 0.3555 | 151.1792 |
| CardioEmbolicStroke | log_s_Lactobacillus_amylovorus    | Weighted median           | 9 | 0.0349  | 0.1383 | 0.8007 | -0.0983 | 0.1829 | 0.6074 | 7.7462  | 0.3555 | 151.1792 |
| CardioEmbolicStroke | log_s_Lactobacillus_amylovorus    | Inverse variance weighted | 9 | 0.1013  | 0.1046 | 0.3331 | -0.0983 | 0.1829 | 0.6074 | 7.7462  | 0.3555 | 151.1792 |
| CardioEmbolicStroke | log_s_Lactobacillus_amylovorus    | Simple mode               | 9 | -0.0169 | 0.2046 | 0.9362 | -0.0983 | 0.1829 | 0.6074 | 7.7462  | 0.3555 | 151.1792 |
| CardioEmbolicStroke | log_s_Lactobacillus_amylovorus    | Weighted mode             | 9 | 0.0290  | 0.2056 | 0.8912 | -0.0983 | 0.1829 | 0.6074 | 7.7462  | 0.3555 | 151.1792 |
| CardioEmbolicStroke | log_s_Lactobacillus_casei         | MR Egger                  | 9 | -0.7226 | 0.7636 | 0.3755 | 0.1843  | 0.1946 | 0.3752 | 8.6296  | 0.2804 | 54.6872  |
| CardioEmbolicStroke | log_s_Lactobacillus_casei         | Weighted median           | 9 | 0.1249  | 0.1395 | 0.3709 | 0.1843  | 0.1946 | 0.3752 | 8.6296  | 0.2804 | 54.6872  |
| CardioEmbolicStroke | log_s_Lactobacillus_casei         | Inverse variance weighted | 9 | -0.0079 | 0.1152 | 0.9455 | 0.1843  | 0.1946 | 0.3752 | 8.6296  | 0.2804 | 54.6872  |
| CardioEmbolicStroke | log_s_Lactobacillus_casei         | Simple mode               | 9 | 0.0542  | 0.1799 | 0.7711 | 0.1843  | 0.1946 | 0.3752 | 8.6296  | 0.2804 | 54.6872  |
| CardioEmbolicStroke | log_s_Lactobacillus_casei         | Weighted mode             | 9 | 0.1384  | 0.1717 | 0.4433 | 0.1843  | 0.1946 | 0.3752 | 8.6296  | 0.2804 | 54.6872  |
| CardioEmbolicStroke | log_s_Lactobacillus_crispatus     | MR Egger                  | 9 | 1.6366  | 0.6930 | 0.0502 | -0.3810 | 0.1767 | 0.0680 | 9.3974  | 0.3099 | 65.8700  |
| CardioEmbolicStroke | log_s_Lactobacillus_crispatus     | Weighted median           | 9 | 0.2198  | 0.1448 | 0.1289 | -0.3810 | 0.1767 | 0.0680 | 9.3974  | 0.3099 | 65.8700  |
| CardioEmbolicStroke | log_s_Lactobacillus_crispatus     | Inverse variance weighted | 9 | 0.1601  | 0.1146 | 0.1624 | -0.3810 | 0.1767 | 0.0680 | 9.3974  | 0.3099 | 65.8700  |
| CardioEmbolicStroke | log_s_Lactobacillus_crispatus     | Simple mode               | 9 | 0.2053  | 0.2430 | 0.4228 | -0.3810 | 0.1767 | 0.0680 | 9.3974  | 0.3099 | 65.8700  |
| CardioEmbolicStroke | log_s_Lactobacillus_crispatus     | Weighted mode             | 9 | 0.2627  | 0.2254 | 0.2774 | -0.3810 | 0.1767 | 0.0680 | 9.3974  | 0.3099 | 65.8700  |
| CardioEmbolicStroke | log_s_Lactobacillus_delbrueckii   | MR Egger                  | 9 | 0.3387  | 0.8227 | 0.6929 | -0.1075 | 0.2099 | 0.6242 | 10.4354 | 0.1652 | 130.7323 |
| CardioEmbolicStroke | log_s_Lactobacillus_delbrueckii   | Weighted median           | 9 | -0.1340 | 0.1479 | 0.3650 | -0.1075 | 0.2099 | 0.6242 | 10.4354 | 0.1652 | 130.7323 |
| CardioEmbolicStroke | log_s_Lactobacillus_delbrueckii   | Inverse variance weighted | 9 | -0.0778 | 0.1199 | 0.5164 | -0.1075 | 0.2099 | 0.6242 | 10.4354 | 0.1652 | 130.7323 |
| CardioEmbolicStroke | log_s_Lactobacillus_delbrueckii   | Simple mode               | 9 | -0.2792 | 0.2487 | 0.2940 | -0.1075 | 0.2099 | 0.6242 | 10.4354 | 0.1652 | 130.7323 |
| CardioEmbolicStroke | log_s_Lactobacillus_delbrueckii   | Weighted mode             | 9 | -0.2373 | 0.2392 | 0.3502 | -0.1075 | 0.2099 | 0.6242 | 10.4354 | 0.1652 | 130.7323 |
| CardioEmbolicStroke | log_s_Lactobacillus_fermentum     | MR Egger                  | 9 | -0.1059 | 0.6777 | 0.8802 | 0.0267  | 0.1729 | 0.8818 | 5.2224  | 0.6328 | 279.0266 |
| CardioEmbolicStroke | log_s_Lactobacillus_fermentum     | Weighted median           | 9 | 0.0183  | 0.1298 | 0.8878 | 0.0267  | 0.1729 | 0.8818 | 5.2224  | 0.6328 | 279.0266 |
| CardioEmbolicStroke | log_s_Lactobacillus_fermentum     | Inverse variance weighted | 9 | -0.0026 | 0.1035 | 0.9796 | 0.0267  | 0.1729 | 0.8818 | 5.2224  | 0.6328 | 279.0266 |
| CardioEmbolicStroke | log_s_Lactobacillus_fermentum     | Simple mode               | 9 | 0.0172  | 0.2109 | 0.9372 | 0.0267  | 0.1729 | 0.8818 | 5.2224  | 0.6328 | 279.0266 |
| CardioEmbolicStroke | log_s_Lactobacillus_fermentum     | Weighted mode             | 9 | 0.0149  | 0.2136 | 0.9460 | 0.0267  | 0.1729 | 0.8818 | 5.2224  | 0.6328 | 279.0266 |
| CardioEmbolicStroke | log_s_Lactobacillus_gasseri       | MR Egger                  | 9 | 0.7346  | 0.6707 | 0.3096 | -0.2094 | 0.1711 | 0.2607 | 8.4609  | 0.3898 | 168.6689 |
| CardioEmbolicStroke | log_s_Lactobacillus_gasseri       | Weighted median           | 9 | -0.0357 | 0.1341 | 0.7900 | -0.2094 | 0.1711 | 0.2607 | 8.4609  | 0.3898 | 168.6689 |
| CardioEmbolicStroke | log_s_Lactobacillus_gasseri       | Inverse variance weighted | 9 | -0.0764 | 0.1054 | 0.4688 | -0.2094 | 0.1711 | 0.2607 | 8.4609  | 0.3898 | 168.6689 |
| CardioEmbolicStroke | log_s_Lactobacillus_gasseri       | Simple mode               | 9 | -0.0624 | 0.2016 | 0.7650 | -0.2094 | 0.1711 | 0.2607 | 8.4609  | 0.3898 | 168.6689 |
| CardioEmbolicStroke | log_s_Lactobacillus_gasseri       | Weighted mode             | 9 | -0.0448 | 0.1740 | 0.8035 | -0.2094 | 0.1711 | 0.2607 | 8.4609  | 0.3898 | 168.6689 |
| CardioEmbolicStroke | log_s_Lactobacillus_reuteri       | MR Egger                  | 9 | 0.2985  | 0.6728 | 0.6707 | -0.1123 | 0.1716 | 0.5339 | 5.9761  | 0.5425 | 187.0055 |
| CardioEmbolicStroke | log_s_Lactobacillus_reuteri       | Weighted median           | 9 | -0.1221 | 0.1328 | 0.3581 | -0.1123 | 0.1716 | 0.5339 | 5.9761  | 0.5425 | 187.0055 |
| CardioEmbolicStroke | log_s_Lactobacillus_reuteri       | Inverse variance weighted | 9 | -0.1365 | 0.1028 | 0.1845 | -0.1123 | 0.1716 | 0.5339 | 5.9761  | 0.5425 | 187.0055 |
| CardioEmbolicStroke | log_s_Lactobacillus_reuteri       | Simple mode               | 9 | -0.2897 | 0.2068 | 0.1990 | -0.1123 | 0.1716 | 0.5339 | 5.9761  | 0.5425 | 187.0055 |
| CardioEmbolicStroke | log_s_Lactobacillus_reuteri       | Weighted mode             | 9 | -0.1388 | 0.2062 | 0.5199 | -0.1123 | 0.1716 | 0.5339 | 5.9761  | 0.5425 | 187.0055 |
| CardioEmbolicStroke | log_s_Lactobacillus_vaginalis     | MR Egger                  | 9 | 0.0395  | 0.6701 | 0.9547 | -0.0425 | 0.1709 | 0.8108 | 1.0027  | 0.9948 | 501.6349 |
| CardioEmbolicStroke | log_s_Lactobacillus_vaginalis     | Weighted median           | 9 | -0.1632 | 0.1232 | 0.1854 | -0.0425 | 0.1709 | 0.8108 | 1.0027  | 0.9948 | 501.6349 |
| CardioEmbolicStroke | log_s_Lactobacillus_vaginalis     | Inverse variance weighted | 9 | -0.1252 | 0.1024 | 0.2215 | -0.0425 | 0.1709 | 0.8108 | 1.0027  | 0.9948 | 501.6349 |
| CardioEmbolicStroke | log_s_Lactobacillus_vaginalis     | Simple mode               | 9 | -0.1893 | 0.1878 | 0.3430 | -0.0425 | 0.1709 | 0.8108 | 1.0027  | 0.9948 | 501.6349 |
| CardioEmbolicStroke | log_s_Lactobacillus_vaginalis     | Weighted mode             | 9 | -0.1856 | 0.1739 | 0.3169 | -0.0425 | 0.1709 | 0.8108 | 1.0027  | 0.9948 | 501.6349 |

|                     |                                   |                           |   |         |        |        |         |        |        |         |        |          |
|---------------------|-----------------------------------|---------------------------|---|---------|--------|--------|---------|--------|--------|---------|--------|----------|
| CardioEmbolicStroke | log_s_Lawsonia_intracellularis    | MR Egger                  | 9 | -0.4255 | 0.8986 | 0.6503 | 0.0831  | 0.2293 | 0.7277 | 11.8967 | 0.1040 | 77.9777  |
| CardioEmbolicStroke | log_s_Lawsonia_intracellularis    | Weighted median           | 9 | -0.1541 | 0.1450 | 0.2877 | 0.0831  | 0.2293 | 0.7277 | 11.8967 | 0.1040 | 77.9777  |
| CardioEmbolicStroke | log_s_Lawsonia_intracellularis    | Inverse variance weighted | 9 | -0.1035 | 0.1295 | 0.4240 | 0.0831  | 0.2293 | 0.7277 | 11.8967 | 0.1040 | 77.9777  |
| CardioEmbolicStroke | log_s_Lawsonia_intracellularis    | Simple mode               | 9 | -0.1686 | 0.2322 | 0.4885 | 0.0831  | 0.2293 | 0.7277 | 11.8967 | 0.1040 | 77.9777  |
| CardioEmbolicStroke | log_s_Lawsonia_intracellularis    | Weighted mode             | 9 | -0.1411 | 0.1939 | 0.4873 | 0.0831  | 0.2293 | 0.7277 | 11.8967 | 0.1040 | 77.9777  |
| CardioEmbolicStroke | log_s_Leuconostoc_mesenteroides   | MR Egger                  | 9 | -0.0444 | 0.8389 | 0.9593 | -0.0422 | 0.2140 | 0.8492 | 10.6708 | 0.1536 | 92.5192  |
| CardioEmbolicStroke | log_s_Leuconostoc_mesenteroides   | Weighted median           | 9 | -0.3222 | 0.1448 | 0.0260 | -0.0422 | 0.2140 | 0.8492 | 10.6708 | 0.1536 | 92.5192  |
| CardioEmbolicStroke | log_s_Leuconostoc_mesenteroides   | Inverse variance weighted | 9 | -0.2080 | 0.1202 | 0.0835 | -0.0422 | 0.2140 | 0.8492 | 10.6708 | 0.1536 | 92.5192  |
| CardioEmbolicStroke | log_s_Leuconostoc_mesenteroides   | Simple mode               | 9 | -0.3229 | 0.2357 | 0.2080 | -0.0422 | 0.2140 | 0.8492 | 10.6708 | 0.1536 | 92.5192  |
| CardioEmbolicStroke | log_s_Leuconostoc_mesenteroides   | Weighted mode             | 9 | -0.3437 | 0.2527 | 0.2109 | -0.0422 | 0.2140 | 0.8492 | 10.6708 | 0.1536 | 92.5192  |
| CardioEmbolicStroke | log_s_Methylobacillus_flagellatus | MR Egger                  | 9 | 0.2739  | 0.6855 | 0.7014 | -0.1008 | 0.1749 | 0.5825 | 7.1958  | 0.4088 | 142.5782 |
| CardioEmbolicStroke | log_s_Methylobacillus_flagellatus | Weighted median           | 9 | -0.1126 | 0.1390 | 0.4176 | -0.1008 | 0.1749 | 0.5825 | 7.1958  | 0.4088 | 142.5782 |
| CardioEmbolicStroke | log_s_Methylobacillus_flagellatus | Inverse variance weighted | 9 | -0.1164 | 0.1032 | 0.2591 | -0.1008 | 0.1749 | 0.5825 | 7.1958  | 0.4088 | 142.5782 |
| CardioEmbolicStroke | log_s_Methylobacillus_flagellatus | Simple mode               | 9 | -0.1796 | 0.2370 | 0.4704 | -0.1008 | 0.1749 | 0.5825 | 7.1958  | 0.4088 | 142.5782 |
| CardioEmbolicStroke | log_s_Methylobacillus_flagellatus | Weighted mode             | 9 | -0.2061 | 0.2468 | 0.4278 | -0.1008 | 0.1749 | 0.5825 | 7.1958  | 0.4088 | 142.5782 |
| CardioEmbolicStroke | log_s_Mobiluncus_mulieris         | MR Egger                  | 9 | 0.1346  | 0.8821 | 0.8830 | -0.0611 | 0.2251 | 0.7939 | 11.5465 | 0.1165 | 103.0740 |
| CardioEmbolicStroke | log_s_Mobiluncus_mulieris         | Weighted median           | 9 | -0.0918 | 0.1444 | 0.5248 | -0.0611 | 0.2251 | 0.7939 | 11.5465 | 0.1165 | 103.0740 |
| CardioEmbolicStroke | log_s_Mobiluncus_mulieris         | Inverse variance weighted | 9 | -0.1019 | 0.1267 | 0.4212 | -0.0611 | 0.2251 | 0.7939 | 11.5465 | 0.1165 | 103.0740 |
| CardioEmbolicStroke | log_s_Mobiluncus_mulieris         | Simple mode               | 9 | -0.2300 | 0.2537 | 0.3911 | -0.0611 | 0.2251 | 0.7939 | 11.5465 | 0.1165 | 103.0740 |
| CardioEmbolicStroke | log_s_Mobiluncus_mulieris         | Weighted mode             | 9 | -0.1501 | 0.2126 | 0.5004 | -0.0611 | 0.2251 | 0.7939 | 11.5465 | 0.1165 | 103.0740 |
| CardioEmbolicStroke | log_s_Neisseria_flavescens        | MR Egger                  | 9 | 1.9038  | 0.7175 | 0.0328 | -0.4502 | 0.1830 | 0.0434 | 14.6041 | 0.0673 | 52.9721  |
| CardioEmbolicStroke | log_s_Neisseria_flavescens        | Weighted median           | 9 | 0.1051  | 0.1541 | 0.4950 | -0.4502 | 0.1830 | 0.0434 | 14.6041 | 0.0673 | 52.9721  |
| CardioEmbolicStroke | log_s_Neisseria_flavescens        | Inverse variance weighted | 9 | 0.1589  | 0.1397 | 0.2554 | -0.4502 | 0.1830 | 0.0434 | 14.6041 | 0.0673 | 52.9721  |
| CardioEmbolicStroke | log_s_Neisseria_flavescens        | Simple mode               | 9 | 0.0306  | 0.2741 | 0.9140 | -0.4502 | 0.1830 | 0.0434 | 14.6041 | 0.0673 | 52.9721  |
| CardioEmbolicStroke | log_s_Neisseria_flavescens        | Weighted mode             | 9 | 0.0736  | 0.2627 | 0.7865 | -0.4502 | 0.1830 | 0.0434 | 14.6041 | 0.0673 | 52.9721  |
| CardioEmbolicStroke | log_s_Neisseria_gonorrhoeae       | MR Egger                  | 9 | 2.0478  | 0.6789 | 0.0195 | -0.5502 | 0.1732 | 0.0156 | 12.6038 | 0.1262 | 100.5457 |
| CardioEmbolicStroke | log_s_Neisseria_gonorrhoeae       | Weighted median           | 9 | -0.1125 | 0.1597 | 0.4812 | -0.5502 | 0.1732 | 0.0156 | 12.6038 | 0.1262 | 100.5457 |
| CardioEmbolicStroke | log_s_Neisseria_gonorrhoeae       | Inverse variance weighted | 9 | -0.0836 | 0.1302 | 0.5208 | -0.5502 | 0.1732 | 0.0156 | 12.6038 | 0.1262 | 100.5457 |
| CardioEmbolicStroke | log_s_Neisseria_gonorrhoeae       | Simple mode               | 9 | -0.1909 | 0.2519 | 0.4703 | -0.5502 | 0.1732 | 0.0156 | 12.6038 | 0.1262 | 100.5457 |
| CardioEmbolicStroke | log_s_Neisseria_gonorrhoeae       | Weighted mode             | 9 | -0.1540 | 0.2775 | 0.5940 | -0.5502 | 0.1732 | 0.0156 | 12.6038 | 0.1262 | 100.5457 |
| CardioEmbolicStroke | log_s_Neisseria_meningitidis      | MR Egger                  | 9 | 0.5069  | 0.7194 | 0.5038 | -0.0958 | 0.1835 | 0.6176 | 7.7765  | 0.3527 | 117.9255 |
| CardioEmbolicStroke | log_s_Neisseria_meningitidis      | Weighted median           | 9 | 0.1643  | 0.1438 | 0.2531 | -0.0958 | 0.1835 | 0.6176 | 7.7765  | 0.3527 | 117.9255 |
| CardioEmbolicStroke | log_s_Neisseria_meningitidis      | Inverse variance weighted | 9 | 0.1357  | 0.1047 | 0.1952 | -0.0958 | 0.1835 | 0.6176 | 7.7765  | 0.3527 | 117.9255 |
| CardioEmbolicStroke | log_s_Neisseria_meningitidis      | Simple mode               | 9 | 0.3350  | 0.2594 | 0.2326 | -0.0958 | 0.1835 | 0.6176 | 7.7765  | 0.3527 | 117.9255 |
| CardioEmbolicStroke | log_s_Neisseria_meningitidis      | Weighted mode             | 9 | 0.3426  | 0.2667 | 0.2350 | -0.0958 | 0.1835 | 0.6176 | 7.7765  | 0.3527 | 117.9255 |
| CardioEmbolicStroke | log_s_Neisseria_mucosa            | MR Egger                  | 9 | 1.5707  | 0.6811 | 0.0545 | -0.3893 | 0.1738 | 0.0601 | 8.4511  | 0.3907 | 122.3424 |
| CardioEmbolicStroke | log_s_Neisseria_mucosa            | Weighted median           | 9 | 0.1405  | 0.1449 | 0.3322 | -0.3893 | 0.1738 | 0.0601 | 8.4511  | 0.3907 | 122.3424 |
| CardioEmbolicStroke | log_s_Neisseria_mucosa            | Inverse variance weighted | 9 | 0.0628  | 0.1069 | 0.5572 | -0.3893 | 0.1738 | 0.0601 | 8.4511  | 0.3907 | 122.3424 |
| CardioEmbolicStroke | log_s_Neisseria_mucosa            | Simple mode               | 9 | 0.2607  | 0.2451 | 0.3185 | -0.3893 | 0.1738 | 0.0601 | 8.4511  | 0.3907 | 122.3424 |
| CardioEmbolicStroke | log_s_Neisseria_mucosa            | Weighted mode             | 9 | 0.2360  | 0.2181 | 0.3107 | -0.3893 | 0.1738 | 0.0601 | 8.4511  | 0.3907 | 122.3424 |
| CardioEmbolicStroke | log_s_Neisseria_subflava          | MR Egger                  | 9 | 0.7531  | 0.6748 | 0.3012 | -0.1755 | 0.1722 | 0.3418 | 4.0543  | 0.8522 | 268.5385 |
| CardioEmbolicStroke | log_s_Neisseria_subflava          | Weighted median           | 9 | 0.0496  | 0.1269 | 0.6958 | -0.1755 | 0.1722 | 0.3418 | 4.0543  | 0.8522 | 268.5385 |
| CardioEmbolicStroke | log_s_Neisseria_subflava          | Inverse variance weighted | 9 | 0.0731  | 0.1031 | 0.4781 | -0.1755 | 0.1722 | 0.3418 | 4.0543  | 0.8522 | 268.5385 |
| CardioEmbolicStroke | log_s_Neisseria_subflava          | Simple mode               | 9 | 0.1157  | 0.2168 | 0.6082 | -0.1755 | 0.1722 | 0.3418 | 4.0543  | 0.8522 | 268.5385 |
| CardioEmbolicStroke | log_s_Neisseria_subflava          | Weighted mode             | 9 | 0.1126  | 0.2014 | 0.5913 | -0.1755 | 0.1722 | 0.3418 | 4.0543  | 0.8522 | 268.5385 |
| CardioEmbolicStroke | log_s_Oscillibacter_valericigenes | MR Egger                  | 9 | -0.7819 | 0.7262 | 0.3173 | 0.1552  | 0.1852 | 0.4296 | 7.8960  | 0.3419 | 59.4185  |
| CardioEmbolicStroke | log_s_Oscillibacter_valericigenes | Weighted median           | 9 | -0.1063 | 0.1364 | 0.4360 | 0.1552  | 0.1852 | 0.4296 | 7.8960  | 0.3419 | 59.4185  |
| CardioEmbolicStroke | log_s_Oscillibacter_valericigenes | Inverse variance weighted | 9 | -0.1803 | 0.1086 | 0.0967 | 0.1552  | 0.1852 | 0.4296 | 7.8960  | 0.3419 | 59.4185  |
| CardioEmbolicStroke | log_s_Oscillibacter_valericigenes | Simple mode               | 9 | -0.1050 | 0.1817 | 0.5792 | 0.1552  | 0.1852 | 0.4296 | 7.8960  | 0.3419 | 59.4185  |
| CardioEmbolicStroke | log_s_Oscillibacter_valericigenes | Weighted mode             | 9 | -0.1077 | 0.1643 | 0.5306 | 0.1552  | 0.1852 | 0.4296 | 7.8960  | 0.3419 | 59.4185  |
| CardioEmbolicStroke | log_s_Pantoea_ananatis            | MR Egger                  | 9 | -0.5899 | 0.6747 | 0.4110 | 0.1151  | 0.1721 | 0.5248 | 6.5950  | 0.4722 | 106.9486 |
| CardioEmbolicStroke | log_s_Pantoea_ananatis            | Weighted median           | 9 | -0.0616 | 0.1345 | 0.6472 | 0.1151  | 0.1721 | 0.5248 | 6.5950  | 0.4722 | 106.9486 |
| CardioEmbolicStroke | log_s_Pantoea_ananatis            | Inverse variance weighted | 9 | -0.1437 | 0.1029 | 0.1626 | 0.1151  | 0.1721 | 0.5248 | 6.5950  | 0.4722 | 106.9486 |
| CardioEmbolicStroke | log_s_Pantoea_ananatis            | Simple mode               | 9 | -0.0550 | 0.2272 | 0.8148 | 0.1151  | 0.1721 | 0.5248 | 6.5950  | 0.4722 | 106.9486 |
| CardioEmbolicStroke | log_s_Pantoea_ananatis            | Weighted mode             | 9 | -0.0628 | 0.2137 | 0.7765 | 0.1151  | 0.1721 | 0.5248 | 6.5950  | 0.4722 | 106.9486 |
| CardioEmbolicStroke | log_s_Peptoniphilus_duerdenii     | MR Egger                  | 9 | 0.7796  | 0.6830 | 0.2913 | -0.2026 | 0.1743 | 0.2831 | 4.4596  | 0.8135 | 203.0001 |
| CardioEmbolicStroke | log_s_Peptoniphilus_duerdenii     | Weighted median           | 9 | -0.0251 | 0.1354 | 0.8527 | -0.2026 | 0.1743 | 0.2831 | 4.4596  | 0.8135 | 203.0001 |
| CardioEmbolicStroke | log_s_Peptoniphilus_duerdenii     | Inverse variance weighted | 9 | -0.0052 | 0.1043 | 0.9603 | -0.2026 | 0.1743 | 0.2831 | 4.4596  | 0.8135 | 203.0001 |
| CardioEmbolicStroke | log_s_Peptoniphilus_duerdenii     | Simple mode               | 9 | -0.0794 | 0.2025 | 0.7050 | -0.2026 | 0.1743 | 0.2831 | 4.4596  | 0.8135 | 203.0001 |
| CardioEmbolicStroke | log_s_Peptoniphilus_duerdenii     | Weighted mode             | 9 | -0.0512 | 0.1994 | 0.8039 | -0.2026 | 0.1743 | 0.2831 | 4.4596  | 0.8135 | 203.0001 |
| CardioEmbolicStroke | log_s_Peptoniphilus_harei         | MR Egger                  | 9 | 0.2133  | 0.6858 | 0.7648 | -0.0505 | 0.1750 | 0.7813 | 3.8112  | 0.8012 | 340.5733 |

|                     |                                     |                           |   |         |        |        |         |        |        |         |        |          |
|---------------------|-------------------------------------|---------------------------|---|---------|--------|--------|---------|--------|--------|---------|--------|----------|
| CardioEmbolicStroke | log_s_Peptoniphilus_harei           | Weighted median           | 9 | 0.0404  | 0.1351 | 0.7649 | -0.0505 | 0.1750 | 0.7813 | 3.8112  | 0.8012 | 340.5733 |
| CardioEmbolicStroke | log_s_Peptoniphilus_harei           | Inverse variance weighted | 9 | 0.0178  | 0.1049 | 0.8653 | -0.0505 | 0.1750 | 0.7813 | 3.8112  | 0.8012 | 340.5733 |
| CardioEmbolicStroke | log_s_Peptoniphilus_harei           | Simple mode               | 9 | 0.0085  | 0.2156 | 0.9695 | -0.0505 | 0.1750 | 0.7813 | 3.8112  | 0.8012 | 340.5733 |
| CardioEmbolicStroke | log_s_Peptoniphilus_harei           | Weighted mode             | 9 | 0.1023  | 0.1968 | 0.6171 | -0.0505 | 0.1750 | 0.7813 | 3.8112  | 0.8012 | 340.5733 |
| CardioEmbolicStroke | log_s_Porphyrromonas_endodontalis   | MR Egger                  | 9 | 0.1646  | 0.6720 | 0.8135 | 0.0017  | 0.1714 | 0.9924 | 5.4297  | 0.6077 | 196.0413 |
| CardioEmbolicStroke | log_s_Porphyrromonas_endodontalis   | Weighted median           | 9 | 0.1401  | 0.1369 | 0.3062 | 0.0017  | 0.1714 | 0.9924 | 5.4297  | 0.6077 | 196.0413 |
| CardioEmbolicStroke | log_s_Porphyrromonas_endodontalis   | Inverse variance weighted | 9 | 0.1712  | 0.1027 | 0.0957 | 0.0017  | 0.1714 | 0.9924 | 5.4297  | 0.6077 | 196.0413 |
| CardioEmbolicStroke | log_s_Porphyrromonas_endodontalis   | Simple mode               | 9 | 0.1339  | 0.1998 | 0.5217 | 0.0017  | 0.1714 | 0.9924 | 5.4297  | 0.6077 | 196.0413 |
| CardioEmbolicStroke | log_s_Porphyrromonas_endodontalis   | Weighted mode             | 9 | 0.1424  | 0.1911 | 0.4775 | 0.0017  | 0.1714 | 0.9924 | 5.4297  | 0.6077 | 196.0413 |
| CardioEmbolicStroke | log_s_Porphyrromonas_gingivalis     | MR Egger                  | 9 | -0.0570 | 0.7249 | 0.9395 | 0.0576  | 0.1849 | 0.7644 | 7.9987  | 0.3327 | 142.4327 |
| CardioEmbolicStroke | log_s_Porphyrromonas_gingivalis     | Weighted median           | 9 | 0.1793  | 0.1406 | 0.2023 | 0.0576  | 0.1849 | 0.7644 | 7.9987  | 0.3327 | 142.4327 |
| CardioEmbolicStroke | log_s_Porphyrromonas_gingivalis     | Inverse variance weighted | 9 | 0.1662  | 0.1043 | 0.1110 | 0.0576  | 0.1849 | 0.7644 | 7.9987  | 0.3327 | 142.4327 |
| CardioEmbolicStroke | log_s_Porphyrromonas_gingivalis     | Simple mode               | 9 | 0.2709  | 0.2345 | 0.2813 | 0.0576  | 0.1849 | 0.7644 | 7.9987  | 0.3327 | 142.4327 |
| CardioEmbolicStroke | log_s_Porphyrromonas_gingivalis     | Weighted mode             | 9 | 0.2418  | 0.2105 | 0.2839 | 0.0576  | 0.1849 | 0.7644 | 7.9987  | 0.3327 | 142.4327 |
| CardioEmbolicStroke | log_s_Porphyrromonas_uenonis        | MR Egger                  | 9 | -0.2473 | 0.7686 | 0.7570 | 0.0756  | 0.1961 | 0.7114 | 8.6328  | 0.2801 | 141.2663 |
| CardioEmbolicStroke | log_s_Porphyrromonas_uenonis        | Weighted median           | 9 | 0.0356  | 0.1481 | 0.8103 | 0.0756  | 0.1961 | 0.7114 | 8.6328  | 0.2801 | 141.2663 |
| CardioEmbolicStroke | log_s_Porphyrromonas_uenonis        | Inverse variance weighted | 9 | 0.0453  | 0.1112 | 0.6833 | 0.0756  | 0.1961 | 0.7114 | 8.6328  | 0.2801 | 141.2663 |
| CardioEmbolicStroke | log_s_Porphyrromonas_uenonis        | Simple mode               | 9 | 0.0399  | 0.2003 | 0.8470 | 0.0756  | 0.1961 | 0.7114 | 8.6328  | 0.2801 | 141.2663 |
| CardioEmbolicStroke | log_s_Porphyrromonas_uenonis        | Weighted mode             | 9 | 0.0292  | 0.2102 | 0.8929 | 0.0756  | 0.1961 | 0.7114 | 8.6328  | 0.2801 | 141.2663 |
| CardioEmbolicStroke | log_s_Prevotella_amnii              | MR Egger                  | 9 | -0.6621 | 0.6935 | 0.3715 | 0.1762  | 0.1769 | 0.3525 | 7.3249  | 0.3959 | 160.1548 |
| CardioEmbolicStroke | log_s_Prevotella_amnii              | Weighted median           | 9 | -0.1174 | 0.1400 | 0.4017 | 0.1762  | 0.1769 | 0.3525 | 7.3249  | 0.3959 | 160.1548 |
| CardioEmbolicStroke | log_s_Prevotella_amnii              | Inverse variance weighted | 9 | 0.0205  | 0.1060 | 0.8469 | 0.1762  | 0.1769 | 0.3525 | 7.3249  | 0.3959 | 160.1548 |
| CardioEmbolicStroke | log_s_Prevotella_amnii              | Simple mode               | 9 | -0.1901 | 0.2342 | 0.4405 | 0.1762  | 0.1769 | 0.3525 | 7.3249  | 0.3959 | 160.1548 |
| CardioEmbolicStroke | log_s_Prevotella_amnii              | Weighted mode             | 9 | -0.1862 | 0.2206 | 0.4231 | 0.1762  | 0.1769 | 0.3525 | 7.3249  | 0.3959 | 160.1548 |
| CardioEmbolicStroke | log_s_Prevotella_bryantii           | MR Egger                  | 9 | 0.2008  | 0.6718 | 0.7737 | -0.0383 | 0.1714 | 0.8294 | 5.2350  | 0.6313 | 192.3728 |
| CardioEmbolicStroke | log_s_Prevotella_bryantii           | Weighted median           | 9 | -0.0476 | 0.1275 | 0.7087 | -0.0383 | 0.1714 | 0.8294 | 5.2350  | 0.6313 | 192.3728 |
| CardioEmbolicStroke | log_s_Prevotella_bryantii           | Inverse variance weighted | 9 | 0.0523  | 0.1026 | 0.6104 | -0.0383 | 0.1714 | 0.8294 | 5.2350  | 0.6313 | 192.3728 |
| CardioEmbolicStroke | log_s_Prevotella_bryantii           | Simple mode               | 9 | -0.0910 | 0.1965 | 0.6557 | -0.0383 | 0.1714 | 0.8294 | 5.2350  | 0.6313 | 192.3728 |
| CardioEmbolicStroke | log_s_Prevotella_bryantii           | Weighted mode             | 9 | -0.0767 | 0.1771 | 0.6764 | -0.0383 | 0.1714 | 0.8294 | 5.2350  | 0.6313 | 192.3728 |
| CardioEmbolicStroke | log_s_Prevotella_dentalis           | MR Egger                  | 9 | -0.4979 | 0.6725 | 0.4831 | 0.1342  | 0.1716 | 0.4598 | 2.6256  | 0.9173 | 405.8014 |
| CardioEmbolicStroke | log_s_Prevotella_dentalis           | Weighted median           | 9 | -0.0543 | 0.1329 | 0.6830 | 0.1342  | 0.1716 | 0.4598 | 2.6256  | 0.9173 | 405.8014 |
| CardioEmbolicStroke | log_s_Prevotella_dentalis           | Inverse variance weighted | 9 | 0.0218  | 0.1028 | 0.8317 | 0.1342  | 0.1716 | 0.4598 | 2.6256  | 0.9173 | 405.8014 |
| CardioEmbolicStroke | log_s_Prevotella_dentalis           | Simple mode               | 9 | -0.1026 | 0.2074 | 0.6340 | 0.1342  | 0.1716 | 0.4598 | 2.6256  | 0.9173 | 405.8014 |
| CardioEmbolicStroke | log_s_Prevotella_dentalis           | Weighted mode             | 9 | -0.1002 | 0.1878 | 0.6082 | 0.1342  | 0.1716 | 0.4598 | 2.6256  | 0.9173 | 405.8014 |
| CardioEmbolicStroke | log_s_Prevotella_marshii            | MR Egger                  | 9 | -0.6133 | 0.8511 | 0.4945 | 0.1292  | 0.2172 | 0.5705 | 11.1741 | 0.1312 | 118.8732 |
| CardioEmbolicStroke | log_s_Prevotella_marshii            | Weighted median           | 9 | -0.1390 | 0.1394 | 0.3189 | 0.1292  | 0.2172 | 0.5705 | 11.1741 | 0.1312 | 118.8732 |
| CardioEmbolicStroke | log_s_Prevotella_marshii            | Inverse variance weighted | 9 | -0.1128 | 0.1248 | 0.3661 | 0.1292  | 0.2172 | 0.5705 | 11.1741 | 0.1312 | 118.8732 |
| CardioEmbolicStroke | log_s_Prevotella_marshii            | Simple mode               | 9 | -0.1804 | 0.2370 | 0.4682 | 0.1292  | 0.2172 | 0.5705 | 11.1741 | 0.1312 | 118.8732 |
| CardioEmbolicStroke | log_s_Prevotella_marshii            | Weighted mode             | 9 | -0.1755 | 0.2020 | 0.4100 | 0.1292  | 0.2172 | 0.5705 | 11.1741 | 0.1312 | 118.8732 |
| CardioEmbolicStroke | log_s_Prevotella_melaninogenica     | MR Egger                  | 9 | -0.5231 | 0.7548 | 0.5106 | 0.0872  | 0.1924 | 0.6641 | 8.6440  | 0.2792 | 60.9058  |
| CardioEmbolicStroke | log_s_Prevotella_melaninogenica     | Weighted median           | 9 | -0.2201 | 0.1415 | 0.1198 | 0.0872  | 0.1924 | 0.6641 | 8.6440  | 0.2792 | 60.9058  |
| CardioEmbolicStroke | log_s_Prevotella_melaninogenica     | Inverse variance weighted | 9 | -0.1850 | 0.1089 | 0.0896 | 0.0872  | 0.1924 | 0.6641 | 8.6440  | 0.2792 | 60.9058  |
| CardioEmbolicStroke | log_s_Prevotella_melaninogenica     | Simple mode               | 9 | -0.2470 | 0.2364 | 0.3267 | 0.0872  | 0.1924 | 0.6641 | 8.6440  | 0.2792 | 60.9058  |
| CardioEmbolicStroke | log_s_Prevotella_melaninogenica     | Weighted mode             | 9 | -0.2393 | 0.2320 | 0.3325 | 0.0872  | 0.1924 | 0.6641 | 8.6440  | 0.2792 | 60.9058  |
| CardioEmbolicStroke | log_s_Prevotella_multiformis        | MR Egger                  | 9 | 0.0496  | 0.6743 | 0.9434 | -0.0266 | 0.1720 | 0.8813 | 1.9344  | 0.9634 | 419.9580 |
| CardioEmbolicStroke | log_s_Prevotella_multiformis        | Weighted median           | 9 | -0.0464 | 0.1309 | 0.7231 | -0.0266 | 0.1720 | 0.8813 | 1.9344  | 0.9634 | 419.9580 |
| CardioEmbolicStroke | log_s_Prevotella_multiformis        | Inverse variance weighted | 9 | -0.0536 | 0.1030 | 0.6029 | -0.0266 | 0.1720 | 0.8813 | 1.9344  | 0.9634 | 419.9580 |
| CardioEmbolicStroke | log_s_Prevotella_multiformis        | Simple mode               | 9 | -0.0443 | 0.1898 | 0.8215 | -0.0266 | 0.1720 | 0.8813 | 1.9344  | 0.9634 | 419.9580 |
| CardioEmbolicStroke | log_s_Prevotella_multiformis        | Weighted mode             | 9 | -0.0265 | 0.1882 | 0.8915 | -0.0266 | 0.1720 | 0.8813 | 1.9344  | 0.9634 | 419.9580 |
| CardioEmbolicStroke | log_s_Prevotella_multisaccharivorax | MR Egger                  | 9 | 0.1617  | 0.7878 | 0.8433 | -0.0857 | 0.2009 | 0.6825 | 9.4426  | 0.2224 | 70.6494  |
| CardioEmbolicStroke | log_s_Prevotella_multisaccharivorax | Weighted median           | 9 | -0.2482 | 0.1448 | 0.0864 | -0.0857 | 0.2009 | 0.6825 | 9.4426  | 0.2224 | 70.6494  |
| CardioEmbolicStroke | log_s_Prevotella_multisaccharivorax | Inverse variance weighted | 9 | -0.1705 | 0.1137 | 0.1338 | -0.0857 | 0.2009 | 0.6825 | 9.4426  | 0.2224 | 70.6494  |
| CardioEmbolicStroke | log_s_Prevotella_multisaccharivorax | Simple mode               | 9 | -0.3836 | 0.2722 | 0.1964 | -0.0857 | 0.2009 | 0.6825 | 9.4426  | 0.2224 | 70.6494  |
| CardioEmbolicStroke | log_s_Prevotella_multisaccharivorax | Weighted mode             | 9 | -0.3698 | 0.2574 | 0.1887 | -0.0857 | 0.2009 | 0.6825 | 9.4426  | 0.2224 | 70.6494  |
| CardioEmbolicStroke | log_s_Prevotella_nigrescens         | MR Egger                  | 9 | -0.1339 | 0.7790 | 0.8684 | 0.0745  | 0.1987 | 0.7186 | 9.3212  | 0.2304 | 76.1782  |
| CardioEmbolicStroke | log_s_Prevotella_nigrescens         | Weighted median           | 9 | 0.2349  | 0.1450 | 0.1052 | 0.0745  | 0.1987 | 0.7186 | 9.3212  | 0.2304 | 76.1782  |
| CardioEmbolicStroke | log_s_Prevotella_nigrescens         | Inverse variance weighted | 9 | 0.1550  | 0.1123 | 0.1674 | 0.0745  | 0.1987 | 0.7186 | 9.3212  | 0.2304 | 76.1782  |
| CardioEmbolicStroke | log_s_Prevotella_nigrescens         | Simple mode               | 9 | 0.3241  | 0.2564 | 0.2418 | 0.0745  | 0.1987 | 0.7186 | 9.3212  | 0.2304 | 76.1782  |
| CardioEmbolicStroke | log_s_Prevotella_nigrescens         | Weighted mode             | 9 | 0.3277  | 0.2634 | 0.2487 | 0.0745  | 0.1987 | 0.7186 | 9.3212  | 0.2304 | 76.1782  |
| CardioEmbolicStroke | log_s_Prevotella_pallens            | MR Egger                  | 9 | 0.2458  | 0.6722 | 0.7254 | -0.0683 | 0.1715 | 0.7022 | 6.4278  | 0.4908 | 201.6938 |
| CardioEmbolicStroke | log_s_Prevotella_pallens            | Weighted median           | 9 | 0.0970  | 0.1326 | 0.4643 | -0.0683 | 0.1715 | 0.7022 | 6.4278  | 0.4908 | 201.6938 |

|                     |                                      |                           |   |         |        |        |         |        |        |         |        |          |
|---------------------|--------------------------------------|---------------------------|---|---------|--------|--------|---------|--------|--------|---------|--------|----------|
| CardioEmbolicStroke | log_s_Prevotella_pallens             | Inverse variance weighted | 9 | -0.0189 | 0.1027 | 0.8544 | -0.0683 | 0.1715 | 0.7022 | 6.4278  | 0.4908 | 201.6938 |
| CardioEmbolicStroke | log_s_Prevotella_pallens             | Simple mode               | 9 | 0.1412  | 0.2162 | 0.5318 | -0.0683 | 0.1715 | 0.7022 | 6.4278  | 0.4908 | 201.6938 |
| CardioEmbolicStroke | log_s_Prevotella_pallens             | Weighted mode             | 9 | 0.1626  | 0.1929 | 0.4238 | -0.0683 | 0.1715 | 0.7022 | 6.4278  | 0.4908 | 201.6938 |
| CardioEmbolicStroke | log_s_Prevotella_salivae             | MR Egger                  | 9 | 0.5389  | 0.6975 | 0.4650 | -0.1164 | 0.1779 | 0.5337 | 7.4474  | 0.3838 | 119.4840 |
| CardioEmbolicStroke | log_s_Prevotella_salivae             | Weighted median           | 9 | 0.1050  | 0.1467 | 0.4740 | -0.1164 | 0.1779 | 0.5337 | 7.4474  | 0.3838 | 119.4840 |
| CardioEmbolicStroke | log_s_Prevotella_salivae             | Inverse variance weighted | 9 | 0.0877  | 0.1032 | 0.3952 | -0.1164 | 0.1779 | 0.5337 | 7.4474  | 0.3838 | 119.4840 |
| CardioEmbolicStroke | log_s_Prevotella_salivae             | Simple mode               | 9 | -0.1045 | 0.2420 | 0.6772 | -0.1164 | 0.1779 | 0.5337 | 7.4474  | 0.3838 | 119.4840 |
| CardioEmbolicStroke | log_s_Prevotella_salivae             | Weighted mode             | 9 | 0.1765  | 0.2226 | 0.4506 | -0.1164 | 0.1779 | 0.5337 | 7.4474  | 0.3838 | 119.4840 |
| CardioEmbolicStroke | log_s_Prevotella_veroralis           | MR Egger                  | 9 | 0.7312  | 0.6728 | 0.3132 | -0.1805 | 0.1717 | 0.3281 | 5.4328  | 0.7105 | 252.3409 |
| CardioEmbolicStroke | log_s_Prevotella_veroralis           | Weighted median           | 9 | 0.1401  | 0.1371 | 0.3068 | -0.1805 | 0.1717 | 0.3281 | 5.4328  | 0.7105 | 252.3409 |
| CardioEmbolicStroke | log_s_Prevotella_veroralis           | Inverse variance weighted | 9 | 0.0322  | 0.1028 | 0.7545 | -0.1805 | 0.1717 | 0.3281 | 5.4328  | 0.7105 | 252.3409 |
| CardioEmbolicStroke | log_s_Prevotella_veroralis           | Simple mode               | 9 | 0.1618  | 0.2071 | 0.4571 | -0.1805 | 0.1717 | 0.3281 | 5.4328  | 0.7105 | 252.3409 |
| CardioEmbolicStroke | log_s_Prevotella_veroralis           | Weighted mode             | 9 | 0.1506  | 0.2039 | 0.4814 | -0.1805 | 0.1717 | 0.3281 | 5.4328  | 0.7105 | 252.3409 |
| CardioEmbolicStroke | log_s_Pseudomonas_stutzeri           | MR Egger                  | 9 | -0.4036 | 0.6774 | 0.5701 | 0.0633  | 0.1728 | 0.7248 | 2.6895  | 0.9122 | 179.5421 |
| CardioEmbolicStroke | log_s_Pseudomonas_stutzeri           | Weighted median           | 9 | -0.1112 | 0.1243 | 0.3710 | 0.0633  | 0.1728 | 0.7248 | 2.6895  | 0.9122 | 179.5421 |
| CardioEmbolicStroke | log_s_Pseudomonas_stutzeri           | Inverse variance weighted | 9 | -0.1581 | 0.1033 | 0.1259 | 0.0633  | 0.1728 | 0.7248 | 2.6895  | 0.9122 | 179.5421 |
| CardioEmbolicStroke | log_s_Pseudomonas_stutzeri           | Simple mode               | 9 | -0.0791 | 0.1919 | 0.6910 | 0.0633  | 0.1728 | 0.7248 | 2.6895  | 0.9122 | 179.5421 |
| CardioEmbolicStroke | log_s_Pseudomonas_stutzeri           | Weighted mode             | 9 | -0.0890 | 0.1783 | 0.6312 | 0.0633  | 0.1728 | 0.7248 | 2.6895  | 0.9122 | 179.5421 |
| CardioEmbolicStroke | log_s_Ruminococcus_flavefaciens      | MR Egger                  | 9 | -0.1646 | 0.9844 | 0.8719 | 0.0125  | 0.2512 | 0.9617 | 14.5589 | 0.0421 | 78.9046  |
| CardioEmbolicStroke | log_s_Ruminococcus_flavefaciens      | Weighted median           | 9 | -0.1358 | 0.1474 | 0.3570 | 0.0125  | 0.2512 | 0.9617 | 14.5589 | 0.0421 | 78.9046  |
| CardioEmbolicStroke | log_s_Ruminococcus_flavefaciens      | Inverse variance weighted | 9 | -0.1161 | 0.1409 | 0.4098 | 0.0125  | 0.2512 | 0.9617 | 14.5589 | 0.0421 | 78.9046  |
| CardioEmbolicStroke | log_s_Ruminococcus_flavefaciens      | Simple mode               | 9 | -0.3472 | 0.2408 | 0.1872 | 0.0125  | 0.2512 | 0.9617 | 14.5589 | 0.0421 | 78.9046  |
| CardioEmbolicStroke | log_s_Ruminococcus_flavefaciens      | Weighted mode             | 9 | -0.1556 | 0.2241 | 0.5070 | 0.0125  | 0.2512 | 0.9617 | 14.5589 | 0.0421 | 78.9046  |
| CardioEmbolicStroke | log_s_Serratia_odorifera             | MR Egger                  | 9 | -0.4608 | 0.6740 | 0.5161 | 0.0739  | 0.1719 | 0.6803 | 3.6205  | 0.8223 | 110.5389 |
| CardioEmbolicStroke | log_s_Serratia_odorifera             | Weighted median           | 9 | -0.0854 | 0.1374 | 0.5344 | 0.0739  | 0.1719 | 0.6803 | 3.6205  | 0.8223 | 110.5389 |
| CardioEmbolicStroke | log_s_Serratia_odorifera             | Inverse variance weighted | 9 | -0.1745 | 0.1027 | 0.0894 | 0.0739  | 0.1719 | 0.6803 | 3.6205  | 0.8223 | 110.5389 |
| CardioEmbolicStroke | log_s_Serratia_odorifera             | Simple mode               | 9 | -0.0507 | 0.1758 | 0.7802 | 0.0739  | 0.1719 | 0.6803 | 3.6205  | 0.8223 | 110.5389 |
| CardioEmbolicStroke | log_s_Serratia_odorifera             | Weighted mode             | 9 | -0.0531 | 0.1680 | 0.7599 | 0.0739  | 0.1719 | 0.6803 | 3.6205  | 0.8223 | 110.5389 |
| CardioEmbolicStroke | log_s_Shewanella_putrefaciens        | MR Egger                  | 9 | -0.7091 | 0.7349 | 0.3667 | 0.1362  | 0.1874 | 0.4910 | 8.2115  | 0.3143 | 65.2838  |
| CardioEmbolicStroke | log_s_Shewanella_putrefaciens        | Weighted median           | 9 | -0.1456 | 0.1429 | 0.3084 | 0.1362  | 0.1874 | 0.4910 | 8.2115  | 0.3143 | 65.2838  |
| CardioEmbolicStroke | log_s_Shewanella_putrefaciens        | Inverse variance weighted | 9 | -0.1813 | 0.1086 | 0.0950 | 0.1362  | 0.1874 | 0.4910 | 8.2115  | 0.3143 | 65.2838  |
| CardioEmbolicStroke | log_s_Shewanella_putrefaciens        | Simple mode               | 9 | -0.2620 | 0.2516 | 0.3283 | 0.1362  | 0.1874 | 0.4910 | 8.2115  | 0.3143 | 65.2838  |
| CardioEmbolicStroke | log_s_Shewanella_putrefaciens        | Weighted mode             | 9 | -0.0386 | 0.2043 | 0.8549 | 0.1362  | 0.1874 | 0.4910 | 8.2115  | 0.3143 | 65.2838  |
| CardioEmbolicStroke | log_s_Slackia_exigua                 | MR Egger                  | 9 | -0.1061 | 0.6950 | 0.8830 | 0.0375  | 0.1773 | 0.8384 | 7.4554  | 0.3831 | 198.5497 |
| CardioEmbolicStroke | log_s_Slackia_exigua                 | Weighted median           | 9 | 0.1123  | 0.1447 | 0.4377 | 0.0375  | 0.1773 | 0.8384 | 7.4554  | 0.3831 | 198.5497 |
| CardioEmbolicStroke | log_s_Slackia_exigua                 | Inverse variance weighted | 9 | 0.0393  | 0.1030 | 0.7028 | 0.0375  | 0.1773 | 0.8384 | 7.4554  | 0.3831 | 198.5497 |
| CardioEmbolicStroke | log_s_Slackia_exigua                 | Simple mode               | 9 | 0.1248  | 0.2307 | 0.6033 | 0.0375  | 0.1773 | 0.8384 | 7.4554  | 0.3831 | 198.5497 |
| CardioEmbolicStroke | log_s_Slackia_exigua                 | Weighted mode             | 9 | 0.1381  | 0.2206 | 0.5487 | 0.0375  | 0.1773 | 0.8384 | 7.4554  | 0.3831 | 198.5497 |
| CardioEmbolicStroke | log_s_Staphylococcus_aureus          | MR Egger                  | 9 | 0.7426  | 0.6724 | 0.3059 | -0.1961 | 0.1715 | 0.2906 | 7.0854  | 0.5274 | 202.1196 |
| CardioEmbolicStroke | log_s_Staphylococcus_aureus          | Weighted median           | 9 | -0.1141 | 0.1353 | 0.3991 | -0.1961 | 0.1715 | 0.2906 | 7.0854  | 0.5274 | 202.1196 |
| CardioEmbolicStroke | log_s_Staphylococcus_aureus          | Inverse variance weighted | 9 | -0.0169 | 0.1027 | 0.8691 | -0.1961 | 0.1715 | 0.2906 | 7.0854  | 0.5274 | 202.1196 |
| CardioEmbolicStroke | log_s_Staphylococcus_aureus          | Simple mode               | 9 | -0.1917 | 0.2431 | 0.4531 | -0.1961 | 0.1715 | 0.2906 | 7.0854  | 0.5274 | 202.1196 |
| CardioEmbolicStroke | log_s_Staphylococcus_aureus          | Weighted mode             | 9 | -0.1887 | 0.2142 | 0.4042 | -0.1961 | 0.1715 | 0.2906 | 7.0854  | 0.5274 | 202.1196 |
| CardioEmbolicStroke | log_s_Streptococcus_constellatus     | MR Egger                  | 9 | 1.3669  | 0.6751 | 0.0825 | -0.3412 | 0.1722 | 0.0879 | 8.3114  | 0.4037 | 116.1760 |
| CardioEmbolicStroke | log_s_Streptococcus_constellatus     | Weighted median           | 9 | 0.0694  | 0.1353 | 0.6079 | -0.3412 | 0.1722 | 0.0879 | 8.3114  | 0.4037 | 116.1760 |
| CardioEmbolicStroke | log_s_Streptococcus_constellatus     | Inverse variance weighted | 9 | 0.0448  | 0.1050 | 0.6699 | -0.3412 | 0.1722 | 0.0879 | 8.3114  | 0.4037 | 116.1760 |
| CardioEmbolicStroke | log_s_Streptococcus_constellatus     | Simple mode               | 9 | 0.0511  | 0.2039 | 0.8083 | -0.3412 | 0.1722 | 0.0879 | 8.3114  | 0.4037 | 116.1760 |
| CardioEmbolicStroke | log_s_Streptococcus_constellatus     | Weighted mode             | 9 | 0.0619  | 0.1831 | 0.7441 | -0.3412 | 0.1722 | 0.0879 | 8.3114  | 0.4037 | 116.1760 |
| CardioEmbolicStroke | log_s_Streptococcus_cristatus        | MR Egger                  | 9 | 0.0270  | 0.6721 | 0.9690 | -0.0429 | 0.1715 | 0.8095 | 4.7053  | 0.6959 | 224.4595 |
| CardioEmbolicStroke | log_s_Streptococcus_cristatus        | Weighted median           | 9 | -0.1345 | 0.1328 | 0.3111 | -0.0429 | 0.1715 | 0.8095 | 4.7053  | 0.6959 | 224.4595 |
| CardioEmbolicStroke | log_s_Streptococcus_cristatus        | Inverse variance weighted | 9 | -0.1393 | 0.1027 | 0.1751 | -0.0429 | 0.1715 | 0.8095 | 4.7053  | 0.6959 | 224.4595 |
| CardioEmbolicStroke | log_s_Streptococcus_cristatus        | Simple mode               | 9 | -0.1363 | 0.2167 | 0.5469 | -0.0429 | 0.1715 | 0.8095 | 4.7053  | 0.6959 | 224.4595 |
| CardioEmbolicStroke | log_s_Streptococcus_cristatus        | Weighted mode             | 9 | -0.1363 | 0.1970 | 0.5085 | -0.0429 | 0.1715 | 0.8095 | 4.7053  | 0.6959 | 224.4595 |
| CardioEmbolicStroke | log_s_Streptococcus_peroris          | MR Egger                  | 9 | 0.0204  | 0.6730 | 0.9766 | -0.0107 | 0.1717 | 0.9521 | 2.8480  | 0.8987 | 415.7297 |
| CardioEmbolicStroke | log_s_Streptococcus_peroris          | Weighted median           | 9 | -0.0371 | 0.1294 | 0.7742 | -0.0107 | 0.1717 | 0.9521 | 2.8480  | 0.8987 | 415.7297 |
| CardioEmbolicStroke | log_s_Streptococcus_peroris          | Inverse variance weighted | 9 | -0.0210 | 0.1029 | 0.8385 | -0.0107 | 0.1717 | 0.9521 | 2.8480  | 0.8987 | 415.7297 |
| CardioEmbolicStroke | log_s_Streptococcus_peroris          | Simple mode               | 9 | -0.0176 | 0.2106 | 0.9354 | -0.0107 | 0.1717 | 0.9521 | 2.8480  | 0.8987 | 415.7297 |
| CardioEmbolicStroke | log_s_Streptococcus_peroris          | Weighted mode             | 9 | -0.0176 | 0.2006 | 0.9322 | -0.0107 | 0.1717 | 0.9521 | 2.8480  | 0.8987 | 415.7297 |
| CardioEmbolicStroke | log_s_Streptococcus_pseudopneumoniae | MR Egger                  | 9 | -0.1190 | 0.9020 | 0.8988 | 0.0272  | 0.2300 | 0.9092 | 12.4177 | 0.0876 | 79.3615  |
| CardioEmbolicStroke | log_s_Streptococcus_pseudopneumoniae | Weighted median           | 9 | -0.1235 | 0.1582 | 0.4351 | 0.0272  | 0.2300 | 0.9092 | 12.4177 | 0.0876 | 79.3615  |
| CardioEmbolicStroke | log_s_Streptococcus_pseudopneumoniae | Inverse variance weighted | 9 | -0.0136 | 0.1287 | 0.9160 | 0.0272  | 0.2300 | 0.9092 | 12.4177 | 0.0876 | 79.3615  |

|                     |                                         |                           |   |         |        |        |         |        |        |         |        |          |
|---------------------|-----------------------------------------|---------------------------|---|---------|--------|--------|---------|--------|--------|---------|--------|----------|
| CardioEmbolicStroke | log_s_Streptococcus_pseudopneumoniae    | Simple mode               | 9 | -0.1954 | 0.2615 | 0.4762 | 0.0272  | 0.2300 | 0.9092 | 12.4177 | 0.0876 | 79.3615  |
| CardioEmbolicStroke | log_s_Streptococcus_pseudopneumoniae    | Weighted mode             | 9 | -0.2296 | 0.2111 | 0.3086 | 0.0272  | 0.2300 | 0.9092 | 12.4177 | 0.0876 | 79.3615  |
| CardioEmbolicStroke | log_s_Succinatimonas_hippeï             | MR Egger                  | 9 | 0.8746  | 0.6731 | 0.2350 | -0.2300 | 0.1717 | 0.2223 | 8.0735  | 0.4263 | 168.6263 |
| CardioEmbolicStroke | log_s_Succinatimonas_hippeï             | Weighted median           | 9 | -0.1078 | 0.1477 | 0.4656 | -0.2300 | 0.1717 | 0.2223 | 8.0735  | 0.4263 | 168.6263 |
| CardioEmbolicStroke | log_s_Succinatimonas_hippeï             | Inverse variance weighted | 9 | -0.0165 | 0.1033 | 0.8732 | -0.2300 | 0.1717 | 0.2223 | 8.0735  | 0.4263 | 168.6263 |
| CardioEmbolicStroke | log_s_Succinatimonas_hippeï             | Simple mode               | 9 | -0.2661 | 0.2638 | 0.3427 | -0.2300 | 0.1717 | 0.2223 | 8.0735  | 0.4263 | 168.6263 |
| CardioEmbolicStroke | log_s_Succinatimonas_hippeï             | Weighted mode             | 9 | 0.2981  | 0.2422 | 0.2534 | -0.2300 | 0.1717 | 0.2223 | 8.0735  | 0.4263 | 168.6263 |
| CardioEmbolicStroke | log_s_Turicibacter_sanguinis            | MR Egger                  | 9 | 0.5431  | 0.6739 | 0.4469 | -0.1884 | 0.1719 | 0.3093 | 8.1583  | 0.4182 | 96.4064  |
| CardioEmbolicStroke | log_s_Turicibacter_sanguinis            | Weighted median           | 9 | -0.1444 | 0.1424 | 0.3106 | -0.1884 | 0.1719 | 0.3093 | 8.1583  | 0.4182 | 96.4064  |
| CardioEmbolicStroke | log_s_Turicibacter_sanguinis            | Inverse variance weighted | 9 | -0.1871 | 0.1038 | 0.0716 | -0.1884 | 0.1719 | 0.3093 | 8.1583  | 0.4182 | 96.4064  |
| CardioEmbolicStroke | log_s_Turicibacter_sanguinis            | Simple mode               | 9 | -0.1382 | 0.2312 | 0.5666 | -0.1884 | 0.1719 | 0.3093 | 8.1583  | 0.4182 | 96.4064  |
| CardioEmbolicStroke | log_s_Turicibacter_sanguinis            | Weighted mode             | 9 | -0.1293 | 0.2290 | 0.5879 | -0.1884 | 0.1719 | 0.3093 | 8.1583  | 0.4182 | 96.4064  |
| CardioEmbolicStroke | log_s_Vibrio_cholerae                   | MR Egger                  | 9 | 0.9804  | 0.6719 | 0.1879 | -0.2402 | 0.1714 | 0.2038 | 7.3813  | 0.4961 | 188.9011 |
| CardioEmbolicStroke | log_s_Vibrio_cholerae                   | Weighted median           | 9 | 0.0978  | 0.1369 | 0.4750 | -0.2402 | 0.1714 | 0.2038 | 7.3813  | 0.4961 | 188.9011 |
| CardioEmbolicStroke | log_s_Vibrio_cholerae                   | Inverse variance weighted | 9 | 0.0498  | 0.1027 | 0.6278 | -0.2402 | 0.1714 | 0.2038 | 7.3813  | 0.4961 | 188.9011 |
| CardioEmbolicStroke | log_s_Vibrio_cholerae                   | Simple mode               | 9 | 0.1424  | 0.2360 | 0.5630 | -0.2402 | 0.1714 | 0.2038 | 7.3813  | 0.4961 | 188.9011 |
| CardioEmbolicStroke | log_s_Vibrio_cholerae                   | Weighted mode             | 9 | 0.1424  | 0.2206 | 0.5367 | -0.2402 | 0.1714 | 0.2038 | 7.3813  | 0.4961 | 188.9011 |
| CardioEmbolicStroke | log_s_Vibrio_furnissii                  | MR Egger                  | 9 | 0.4816  | 0.6722 | 0.4969 | -0.1688 | 0.1715 | 0.3579 | 5.3812  | 0.7162 | 192.6721 |
| CardioEmbolicStroke | log_s_Vibrio_furnissii                  | Weighted median           | 9 | -0.2373 | 0.1383 | 0.0863 | -0.1688 | 0.1715 | 0.3579 | 5.3812  | 0.7162 | 192.6721 |
| CardioEmbolicStroke | log_s_Vibrio_furnissii                  | Inverse variance weighted | 9 | -0.1721 | 0.1028 | 0.0940 | -0.1688 | 0.1715 | 0.3579 | 5.3812  | 0.7162 | 192.6721 |
| CardioEmbolicStroke | log_s_Vibrio_furnissii                  | Simple mode               | 9 | -0.2578 | 0.2227 | 0.2805 | -0.1688 | 0.1715 | 0.3579 | 5.3812  | 0.7162 | 192.6721 |
| CardioEmbolicStroke | log_s_Vibrio_furnissii                  | Weighted mode             | 9 | -0.2676 | 0.2203 | 0.2590 | -0.1688 | 0.1715 | 0.3579 | 5.3812  | 0.7162 | 192.6721 |
| CardioEmbolicStroke | log_s_unclassified_Streptococcus_oralis | MR Egger                  | 9 | 0.2831  | 0.6741 | 0.6871 | -0.1028 | 0.1720 | 0.5688 | 1.3343  | 0.9875 | 426.8241 |
| CardioEmbolicStroke | log_s_unclassified_Streptococcus_oralis | Weighted median           | 9 | -0.0896 | 0.1280 | 0.4839 | -0.1028 | 0.1720 | 0.5688 | 1.3343  | 0.9875 | 426.8241 |
| CardioEmbolicStroke | log_s_unclassified_Streptococcus_oralis | Inverse variance weighted | 9 | -0.1151 | 0.1030 | 0.2640 | -0.1028 | 0.1720 | 0.5688 | 1.3343  | 0.9875 | 426.8241 |
| CardioEmbolicStroke | log_s_unclassified_Streptococcus_oralis | Simple mode               | 9 | -0.0131 | 0.1901 | 0.9467 | -0.1028 | 0.1720 | 0.5688 | 1.3343  | 0.9875 | 426.8241 |
| CardioEmbolicStroke | log_s_unclassified_Streptococcus_oralis | Weighted mode             | 9 | -0.0059 | 0.1808 | 0.9749 | -0.1028 | 0.1720 | 0.5688 | 1.3343  | 0.9875 | 426.8241 |
| CardioEmbolicStroke | o_Actinomycetales                       | MR Egger                  | 9 | 0.3125  | 0.2610 | 0.2702 | -0.0766 | 0.0666 | 0.2879 | 7.3103  | 0.5036 | 844.8084 |
| CardioEmbolicStroke | o_Actinomycetales                       | Weighted median           | 9 | 0.0393  | 0.0546 | 0.4717 | -0.0766 | 0.0666 | 0.2879 | 7.3103  | 0.5036 | 844.8084 |
| CardioEmbolicStroke | o_Actinomycetales                       | Inverse variance weighted | 9 | 0.0158  | 0.0399 | 0.6914 | -0.0766 | 0.0666 | 0.2879 | 7.3103  | 0.5036 | 844.8084 |
| CardioEmbolicStroke | o_Actinomycetales                       | Simple mode               | 9 | 0.0369  | 0.0805 | 0.6590 | -0.0766 | 0.0666 | 0.2879 | 7.3103  | 0.5036 | 844.8084 |
| CardioEmbolicStroke | o_Actinomycetales                       | Weighted mode             | 9 | 0.0439  | 0.0737 | 0.5681 | -0.0766 | 0.0666 | 0.2879 | 7.3103  | 0.5036 | 844.8084 |
| CardioEmbolicStroke | o_Bacillales                            | MR Egger                  | 9 | 0.0467  | 0.2881 | 0.8759 | -0.0007 | 0.0735 | 0.9925 | 8.7469  | 0.2713 | 712.3792 |
| CardioEmbolicStroke | o_Bacillales                            | Weighted median           | 9 | 0.0653  | 0.0553 | 0.2379 | -0.0007 | 0.0735 | 0.9925 | 8.7469  | 0.2713 | 712.3792 |
| CardioEmbolicStroke | o_Bacillales                            | Inverse variance weighted | 9 | 0.0439  | 0.0412 | 0.2864 | -0.0007 | 0.0735 | 0.9925 | 8.7469  | 0.2713 | 712.3792 |
| CardioEmbolicStroke | o_Bacillales                            | Simple mode               | 9 | 0.0981  | 0.1012 | 0.3609 | -0.0007 | 0.0735 | 0.9925 | 8.7469  | 0.2713 | 712.3792 |
| CardioEmbolicStroke | o_Bacillales                            | Weighted mode             | 9 | 0.1053  | 0.1038 | 0.3403 | -0.0007 | 0.0735 | 0.9925 | 8.7469  | 0.2713 | 712.3792 |
| CardioEmbolicStroke | o_Campylobacteriales                    | MR Egger                  | 9 | 0.4191  | 0.4156 | 0.3469 | -0.1167 | 0.1060 | 0.3074 | 10.1389 | 0.2554 | 234.2941 |
| CardioEmbolicStroke | o_Campylobacteriales                    | Weighted median           | 9 | -0.0633 | 0.0736 | 0.3894 | -0.1167 | 0.1060 | 0.3074 | 10.1389 | 0.2554 | 234.2941 |
| CardioEmbolicStroke | o_Campylobacteriales                    | Inverse variance weighted | 9 | -0.0330 | 0.0644 | 0.6082 | -0.1167 | 0.1060 | 0.3074 | 10.1389 | 0.2554 | 234.2941 |
| CardioEmbolicStroke | o_Campylobacteriales                    | Simple mode               | 9 | -0.0652 | 0.1018 | 0.5399 | -0.1167 | 0.1060 | 0.3074 | 10.1389 | 0.2554 | 234.2941 |
| CardioEmbolicStroke | o_Campylobacteriales                    | Weighted mode             | 9 | -0.0670 | 0.0979 | 0.5128 | -0.1167 | 0.1060 | 0.3074 | 10.1389 | 0.2554 | 234.2941 |
| CardioEmbolicStroke | o_Clostridiales                         | MR Egger                  | 9 | 0.5217  | 0.2087 | 0.0410 | -0.1277 | 0.0532 | 0.0476 | 12.2185 | 0.1417 | 603.9868 |
| CardioEmbolicStroke | o_Clostridiales                         | Weighted median           | 9 | 0.0304  | 0.0454 | 0.5039 | -0.1277 | 0.0532 | 0.0476 | 12.2185 | 0.1417 | 603.9868 |
| CardioEmbolicStroke | o_Clostridiales                         | Inverse variance weighted | 9 | 0.0271  | 0.0394 | 0.4925 | -0.1277 | 0.0532 | 0.0476 | 12.2185 | 0.1417 | 603.9868 |
| CardioEmbolicStroke | o_Clostridiales                         | Simple mode               | 9 | 0.0612  | 0.0754 | 0.4405 | -0.1277 | 0.0532 | 0.0476 | 12.2185 | 0.1417 | 603.9868 |
| CardioEmbolicStroke | o_Clostridiales                         | Weighted mode             | 9 | 0.0500  | 0.0638 | 0.4560 | -0.1277 | 0.0532 | 0.0476 | 12.2185 | 0.1417 | 603.9868 |
| CardioEmbolicStroke | o_Erysipelotrichales                    | MR Egger                  | 9 | 0.0119  | 0.2658 | 0.9655 | 0.0012  | 0.0678 | 0.9863 | 7.9516  | 0.3369 | 722.1826 |
| CardioEmbolicStroke | o_Erysipelotrichales                    | Weighted median           | 9 | 0.0199  | 0.0507 | 0.6945 | 0.0012  | 0.0678 | 0.9863 | 7.9516  | 0.3369 | 722.1826 |
| CardioEmbolicStroke | o_Erysipelotrichales                    | Inverse variance weighted | 9 | 0.0166  | 0.0381 | 0.6635 | 0.0012  | 0.0678 | 0.9863 | 7.9516  | 0.3369 | 722.1826 |
| CardioEmbolicStroke | o_Erysipelotrichales                    | Simple mode               | 9 | 0.1165  | 0.0911 | 0.2371 | 0.0012  | 0.0678 | 0.9863 | 7.9516  | 0.3369 | 722.1826 |
| CardioEmbolicStroke | o_Erysipelotrichales                    | Weighted mode             | 9 | -0.0669 | 0.0849 | 0.4536 | 0.0012  | 0.0678 | 0.9863 | 7.9516  | 0.3369 | 722.1826 |
| CardioEmbolicStroke | o_Pasteurellales                        | MR Egger                  | 9 | 1.2403  | 0.6113 | 0.0820 | -0.3092 | 0.1560 | 0.0878 | 8.4597  | 0.3899 | 158.5585 |
| CardioEmbolicStroke | o_Pasteurellales                        | Weighted median           | 9 | -0.0915 | 0.1260 | 0.4681 | -0.3092 | 0.1560 | 0.0878 | 8.4597  | 0.3899 | 158.5585 |
| CardioEmbolicStroke | o_Pasteurellales                        | Inverse variance weighted | 9 | 0.0424  | 0.0961 | 0.6590 | -0.3092 | 0.1560 | 0.0878 | 8.4597  | 0.3899 | 158.5585 |
| CardioEmbolicStroke | o_Pasteurellales                        | Simple mode               | 9 | -0.1412 | 0.2208 | 0.5404 | -0.3092 | 0.1560 | 0.0878 | 8.4597  | 0.3899 | 158.5585 |
| CardioEmbolicStroke | o_Pasteurellales                        | Weighted mode             | 9 | -0.1351 | 0.2336 | 0.5789 | -0.3092 | 0.1560 | 0.0878 | 8.4597  | 0.3899 | 158.5585 |
| CardioEmbolicStroke | o_Pseudomonadales                       | MR Egger                  | 9 | -0.1466 | 0.7214 | 0.8447 | 0.0167  | 0.1840 | 0.9304 | 3.7255  | 0.8108 | 235.8230 |
| CardioEmbolicStroke | o_Pseudomonadales                       | Weighted median           | 9 | -0.0868 | 0.1378 | 0.5287 | 0.0167  | 0.1840 | 0.9304 | 3.7255  | 0.8108 | 235.8230 |
| CardioEmbolicStroke | o_Pseudomonadales                       | Inverse variance weighted | 9 | -0.0821 | 0.1103 | 0.4566 | 0.0167  | 0.1840 | 0.9304 | 3.7255  | 0.8108 | 235.8230 |
| CardioEmbolicStroke | o_Pseudomonadales                       | Simple mode               | 9 | -0.1278 | 0.2195 | 0.5764 | 0.0167  | 0.1840 | 0.9304 | 3.7255  | 0.8108 | 235.8230 |

|                     |                              |                           |   |         |        |        |         |        |        |         |        |          |
|---------------------|------------------------------|---------------------------|---|---------|--------|--------|---------|--------|--------|---------|--------|----------|
| CardioEmbolicStroke | o_Pseudomonadales            | Weighted mode             | 9 | -0.0988 | 0.2114 | 0.6526 | 0.0167  | 0.1840 | 0.9304 | 3.7255  | 0.8108 | 235.8230 |
| CardioEmbolicStroke | o_Spirochaetales             | MR Egger                  | 9 | 0.6509  | 0.4016 | 0.1491 | -0.1579 | 0.1025 | 0.1672 | 11.9093 | 0.1553 | 391.1955 |
| CardioEmbolicStroke | o_Spirochaetales             | Weighted median           | 9 | 0.0096  | 0.0799 | 0.9042 | -0.1579 | 0.1025 | 0.1672 | 11.9093 | 0.1553 | 391.1955 |
| CardioEmbolicStroke | o_Spirochaetales             | Inverse variance weighted | 9 | 0.0393  | 0.0664 | 0.5538 | -0.1579 | 0.1025 | 0.1672 | 11.9093 | 0.1553 | 391.1955 |
| CardioEmbolicStroke | o_Spirochaetales             | Simple mode               | 9 | -0.0562 | 0.1446 | 0.7075 | -0.1579 | 0.1025 | 0.1672 | 11.9093 | 0.1553 | 391.1955 |
| CardioEmbolicStroke | o_Spirochaetales             | Weighted mode             | 9 | -0.0253 | 0.1533 | 0.8729 | -0.1579 | 0.1025 | 0.1672 | 11.9093 | 0.1553 | 391.1955 |
| CardioEmbolicStroke | p_Lentisphaerae              | MR Egger                  | 9 | 0.5463  | 1.0000 | 0.6019 | -0.1790 | 0.2551 | 0.5055 | 8.8172  | 0.2660 | 73.3202  |
| CardioEmbolicStroke | p_Lentisphaerae              | Weighted median           | 9 | -0.0438 | 0.1888 | 0.8165 | -0.1790 | 0.2551 | 0.5055 | 8.8172  | 0.2660 | 73.3202  |
| CardioEmbolicStroke | p_Lentisphaerae              | Inverse variance weighted | 9 | -0.1473 | 0.1479 | 0.3192 | -0.1790 | 0.2551 | 0.5055 | 8.8172  | 0.2660 | 73.3202  |
| CardioEmbolicStroke | p_Lentisphaerae              | Simple mode               | 9 | 0.0777  | 0.2948 | 0.7988 | -0.1790 | 0.2551 | 0.5055 | 8.8172  | 0.2660 | 73.3202  |
| CardioEmbolicStroke | p_Lentisphaerae              | Weighted mode             | 9 | 0.0212  | 0.2882 | 0.9432 | -0.1790 | 0.2551 | 0.5055 | 8.8172  | 0.2660 | 73.3202  |
| CardioEmbolicStroke | p_Proteobacteria             | MR Egger                  | 9 | 0.0007  | 0.3248 | 0.9984 | -0.0272 | 0.0829 | 0.7524 | 3.5710  | 0.8277 | 617.6325 |
| CardioEmbolicStroke | p_Proteobacteria             | Weighted median           | 9 | -0.0703 | 0.0618 | 0.2551 | -0.0272 | 0.0829 | 0.7524 | 3.5710  | 0.8277 | 617.6325 |
| CardioEmbolicStroke | p_Proteobacteria             | Inverse variance weighted | 9 | -0.1046 | 0.0496 | 0.0351 | -0.0272 | 0.0829 | 0.7524 | 3.5710  | 0.8277 | 617.6325 |
| CardioEmbolicStroke | p_Proteobacteria             | Simple mode               | 9 | -0.0266 | 0.0972 | 0.7909 | -0.0272 | 0.0829 | 0.7524 | 3.5710  | 0.8277 | 617.6325 |
| CardioEmbolicStroke | p_Proteobacteria             | Weighted mode             | 9 | -0.0416 | 0.0975 | 0.6808 | -0.0272 | 0.0829 | 0.7524 | 3.5710  | 0.8277 | 617.6325 |
| CardioEmbolicStroke | p_Synergistetes              | MR Egger                  | 9 | 0.7413  | 0.9820 | 0.4749 | -0.2046 | 0.2505 | 0.4411 | 10.0404 | 0.1863 | 84.4229  |
| CardioEmbolicStroke | p_Synergistetes              | Weighted median           | 9 | -0.0620 | 0.1805 | 0.7312 | -0.2046 | 0.2505 | 0.4411 | 10.0404 | 0.1863 | 84.4229  |
| CardioEmbolicStroke | p_Synergistetes              | Inverse variance weighted | 9 | -0.0511 | 0.1469 | 0.7279 | -0.2046 | 0.2505 | 0.4411 | 10.0404 | 0.1863 | 84.4229  |
| CardioEmbolicStroke | p_Synergistetes              | Simple mode               | 9 | -0.1231 | 0.2745 | 0.6657 | -0.2046 | 0.2505 | 0.4411 | 10.0404 | 0.1863 | 84.4229  |
| CardioEmbolicStroke | p_Synergistetes              | Weighted mode             | 9 | -0.1374 | 0.3018 | 0.6611 | -0.2046 | 0.2505 | 0.4411 | 10.0404 | 0.1863 | 84.4229  |
| CardioEmbolicStroke | p_Verrucomicrobia            | MR Egger                  | 9 | 0.2111  | 1.1981 | 0.8651 | -0.1076 | 0.3057 | 0.7352 | 8.8845  | 0.2611 | 43.1828  |
| CardioEmbolicStroke | p_Verrucomicrobia            | Weighted median           | 9 | -0.3057 | 0.2325 | 0.1315 | -0.1076 | 0.3057 | 0.7352 | 8.8845  | 0.2611 | 43.1828  |
| CardioEmbolicStroke | p_Verrucomicrobia            | Inverse variance weighted | 9 | -0.2058 | 0.1728 | 0.2337 | -0.1076 | 0.3057 | 0.7352 | 8.8845  | 0.2611 | 43.1828  |
| CardioEmbolicStroke | p_Verrucomicrobia            | Simple mode               | 9 | -0.4170 | 0.4061 | 0.3346 | -0.1076 | 0.3057 | 0.7352 | 8.8845  | 0.2611 | 43.1828  |
| CardioEmbolicStroke | p_Verrucomicrobia            | Weighted mode             | 9 | -0.4045 | 0.3959 | 0.3369 | -0.1076 | 0.3057 | 0.7352 | 8.8845  | 0.2611 | 43.1828  |
| CardioEmbolicStroke | s_Acidaminococcus_fermentans | MR Egger                  | 9 | -0.7298 | 0.5032 | 0.1902 | 0.1959  | 0.1284 | 0.1708 | 8.6429  | 0.3733 | 241.7814 |
| CardioEmbolicStroke | s_Acidaminococcus_fermentans | Weighted median           | 9 | 0.0760  | 0.1041 | 0.4649 | 0.1959  | 0.1284 | 0.1708 | 8.6429  | 0.3733 | 241.7814 |
| CardioEmbolicStroke | s_Acidaminococcus_fermentans | Inverse variance weighted | 9 | 0.0291  | 0.0799 | 0.7156 | 0.1959  | 0.1284 | 0.1708 | 8.6429  | 0.3733 | 241.7814 |
| CardioEmbolicStroke | s_Acidaminococcus_fermentans | Simple mode               | 9 | 0.1326  | 0.1773 | 0.4759 | 0.1959  | 0.1284 | 0.1708 | 8.6429  | 0.3733 | 241.7814 |
| CardioEmbolicStroke | s_Acidaminococcus_fermentans | Weighted mode             | 9 | 0.1204  | 0.1667 | 0.4905 | 0.1959  | 0.1284 | 0.1708 | 8.6429  | 0.3733 | 241.7814 |
| CardioEmbolicStroke | s_Actinomyces_odontolyticus  | MR Egger                  | 9 | -0.0426 | 0.4426 | 0.9259 | 0.0058  | 0.1129 | 0.9604 | 2.2602  | 0.9441 | 693.4708 |
| CardioEmbolicStroke | s_Actinomyces_odontolyticus  | Weighted median           | 9 | -0.0402 | 0.0840 | 0.6320 | 0.0058  | 0.1129 | 0.9604 | 2.2602  | 0.9441 | 693.4708 |
| CardioEmbolicStroke | s_Actinomyces_odontolyticus  | Inverse variance weighted | 9 | -0.0201 | 0.0676 | 0.7662 | 0.0058  | 0.1129 | 0.9604 | 2.2602  | 0.9441 | 693.4708 |
| CardioEmbolicStroke | s_Actinomyces_odontolyticus  | Simple mode               | 9 | -0.0615 | 0.1262 | 0.6391 | 0.0058  | 0.1129 | 0.9604 | 2.2602  | 0.9441 | 693.4708 |
| CardioEmbolicStroke | s_Actinomyces_odontolyticus  | Weighted mode             | 9 | -0.0741 | 0.1283 | 0.5796 | 0.0058  | 0.1129 | 0.9604 | 2.2602  | 0.9441 | 693.4708 |
| CardioEmbolicStroke | s_Actinomyces_viscosus       | MR Egger                  | 9 | 0.3772  | 0.3935 | 0.3697 | -0.0952 | 0.1004 | 0.3744 | 6.1920  | 0.5175 | 382.8570 |
| CardioEmbolicStroke | s_Actinomyces_viscosus       | Weighted median           | 9 | -0.0118 | 0.0790 | 0.8812 | -0.0952 | 0.1004 | 0.3744 | 6.1920  | 0.5175 | 382.8570 |
| CardioEmbolicStroke | s_Actinomyces_viscosus       | Inverse variance weighted | 9 | 0.0083  | 0.0602 | 0.8904 | -0.0952 | 0.1004 | 0.3744 | 6.1920  | 0.5175 | 382.8570 |
| CardioEmbolicStroke | s_Actinomyces_viscosus       | Simple mode               | 9 | -0.0732 | 0.1264 | 0.5783 | -0.0952 | 0.1004 | 0.3744 | 6.1920  | 0.5175 | 382.8570 |
| CardioEmbolicStroke | s_Actinomyces_viscosus       | Weighted mode             | 9 | -0.0311 | 0.1169 | 0.7970 | -0.0952 | 0.1004 | 0.3744 | 6.1920  | 0.5175 | 382.8570 |
| CardioEmbolicStroke | s_Akkermansia_muciniphila    | MR Egger                  | 9 | -0.4138 | 1.1990 | 0.7402 | 0.0644  | 0.3059 | 0.8393 | 8.0502  | 0.3282 | 33.9741  |
| CardioEmbolicStroke | s_Akkermansia_muciniphila    | Weighted median           | 9 | -0.1546 | 0.2294 | 0.5003 | 0.0644  | 0.3059 | 0.8393 | 8.0502  | 0.3282 | 33.9741  |
| CardioEmbolicStroke | s_Akkermansia_muciniphila    | Inverse variance weighted | 9 | -0.1644 | 0.1720 | 0.3390 | 0.0644  | 0.3059 | 0.8393 | 8.0502  | 0.3282 | 33.9741  |
| CardioEmbolicStroke | s_Akkermansia_muciniphila    | Simple mode               | 9 | -0.1110 | 0.4038 | 0.7904 | 0.0644  | 0.3059 | 0.8393 | 8.0502  | 0.3282 | 33.9741  |
| CardioEmbolicStroke | s_Akkermansia_muciniphila    | Weighted mode             | 9 | -0.0204 | 0.3643 | 0.9568 | 0.0644  | 0.3059 | 0.8393 | 8.0502  | 0.3282 | 33.9741  |
| CardioEmbolicStroke | s_Alistipes_shahii           | MR Egger                  | 9 | 0.3858  | 0.6761 | 0.5861 | -0.1112 | 0.1725 | 0.5398 | 10.7056 | 0.1520 | 189.0773 |
| CardioEmbolicStroke | s_Alistipes_shahii           | Weighted median           | 9 | -0.1421 | 0.1206 | 0.2385 | -0.1112 | 0.1725 | 0.5398 | 10.7056 | 0.1520 | 189.0773 |
| CardioEmbolicStroke | s_Alistipes_shahii           | Inverse variance weighted | 9 | -0.0448 | 0.0995 | 0.6525 | -0.1112 | 0.1725 | 0.5398 | 10.7056 | 0.1520 | 189.0773 |
| CardioEmbolicStroke | s_Alistipes_shahii           | Simple mode               | 9 | -0.2111 | 0.2152 | 0.3555 | -0.1112 | 0.1725 | 0.5398 | 10.7056 | 0.1520 | 189.0773 |
| CardioEmbolicStroke | s_Alistipes_shahii           | Weighted mode             | 9 | -0.2003 | 0.2346 | 0.4182 | -0.1112 | 0.1725 | 0.5398 | 10.7056 | 0.1520 | 189.0773 |
| CardioEmbolicStroke | s_Bacteroides_caccae         | MR Egger                  | 9 | -0.4282 | 0.5750 | 0.4806 | 0.1207  | 0.1467 | 0.4378 | 3.3385  | 0.8520 | 394.5546 |
| CardioEmbolicStroke | s_Bacteroides_caccae         | Weighted median           | 9 | 0.0336  | 0.1166 | 0.7736 | 0.1207  | 0.1467 | 0.4378 | 3.3385  | 0.8520 | 394.5546 |
| CardioEmbolicStroke | s_Bacteroides_caccae         | Inverse variance weighted | 9 | 0.0393  | 0.0879 | 0.6549 | 0.1207  | 0.1467 | 0.4378 | 3.3385  | 0.8520 | 394.5546 |
| CardioEmbolicStroke | s_Bacteroides_caccae         | Simple mode               | 9 | 0.1164  | 0.1715 | 0.5163 | 0.1207  | 0.1467 | 0.4378 | 3.3385  | 0.8520 | 394.5546 |
| CardioEmbolicStroke | s_Bacteroides_caccae         | Weighted mode             | 9 | 0.0223  | 0.1728 | 0.9003 | 0.1207  | 0.1467 | 0.4378 | 3.3385  | 0.8520 | 394.5546 |
| CardioEmbolicStroke | s_Bacteroides_clarus         | MR Egger                  | 9 | 0.3890  | 0.5310 | 0.4876 | -0.0839 | 0.1355 | 0.5555 | 7.1729  | 0.4111 | 187.1457 |
| CardioEmbolicStroke | s_Bacteroides_clarus         | Weighted median           | 9 | 0.0205  | 0.1096 | 0.8515 | -0.0839 | 0.1355 | 0.5555 | 7.1729  | 0.4111 | 187.1457 |
| CardioEmbolicStroke | s_Bacteroides_clarus         | Inverse variance weighted | 9 | 0.0641  | 0.0802 | 0.4239 | -0.0839 | 0.1355 | 0.5555 | 7.1729  | 0.4111 | 187.1457 |
| CardioEmbolicStroke | s_Bacteroides_clarus         | Simple mode               | 9 | 0.0369  | 0.1578 | 0.8208 | -0.0839 | 0.1355 | 0.5555 | 7.1729  | 0.4111 | 187.1457 |
| CardioEmbolicStroke | s_Bacteroides_clarus         | Weighted mode             | 9 | 0.0540  | 0.1738 | 0.7639 | -0.0839 | 0.1355 | 0.5555 | 7.1729  | 0.4111 | 187.1457 |

|                     |                             |                           |   |         |        |        |         |        |        |         |        |          |
|---------------------|-----------------------------|---------------------------|---|---------|--------|--------|---------|--------|--------|---------|--------|----------|
| CardioEmbolicStroke | s_Bacteroides_coprocola     | MR Egger                  | 9 | -0.4690 | 0.7307 | 0.5414 | 0.1015  | 0.1864 | 0.6030 | 9.9794  | 0.1897 | 153.3904 |
| CardioEmbolicStroke | s_Bacteroides_coprocola     | Weighted median           | 9 | -0.0863 | 0.1266 | 0.4953 | 0.1015  | 0.1864 | 0.6030 | 9.9794  | 0.1897 | 153.3904 |
| CardioEmbolicStroke | s_Bacteroides_coprocola     | Inverse variance weighted | 9 | -0.0758 | 0.1067 | 0.4771 | 0.1015  | 0.1864 | 0.6030 | 9.9794  | 0.1897 | 153.3904 |
| CardioEmbolicStroke | s_Bacteroides_coprocola     | Simple mode               | 9 | -0.0825 | 0.1796 | 0.6581 | 0.1015  | 0.1864 | 0.6030 | 9.9794  | 0.1897 | 153.3904 |
| CardioEmbolicStroke | s_Bacteroides_coprocola     | Weighted mode             | 9 | -0.0738 | 0.1655 | 0.6675 | 0.1015  | 0.1864 | 0.6030 | 9.9794  | 0.1897 | 153.3904 |
| CardioEmbolicStroke | s_Bacteroides_coprophilus   | MR Egger                  | 9 | -0.8539 | 0.4502 | 0.0997 | 0.2130  | 0.1149 | 0.1060 | 8.4694  | 0.3890 | 312.3174 |
| CardioEmbolicStroke | s_Bacteroides_coprophilus   | Weighted median           | 9 | -0.0819 | 0.0969 | 0.3980 | 0.2130  | 0.1149 | 0.1060 | 8.4694  | 0.3890 | 312.3174 |
| CardioEmbolicStroke | s_Bacteroides_coprophilus   | Inverse variance weighted | 9 | -0.0287 | 0.0708 | 0.6850 | 0.2130  | 0.1149 | 0.1060 | 8.4694  | 0.3890 | 312.3174 |
| CardioEmbolicStroke | s_Bacteroides_coprophilus   | Simple mode               | 9 | -0.1437 | 0.1478 | 0.3593 | 0.2130  | 0.1149 | 0.1060 | 8.4694  | 0.3890 | 312.3174 |
| CardioEmbolicStroke | s_Bacteroides_coprophilus   | Weighted mode             | 9 | -0.1411 | 0.1409 | 0.3459 | 0.2130  | 0.1149 | 0.1060 | 8.4694  | 0.3890 | 312.3174 |
| CardioEmbolicStroke | s_Bacteroides_dorei         | MR Egger                  | 9 | 0.4169  | 0.3890 | 0.3194 | -0.1100 | 0.0992 | 0.3044 | 3.1710  | 0.9232 | 715.2110 |
| CardioEmbolicStroke | s_Bacteroides_dorei         | Weighted median           | 9 | 0.0130  | 0.0753 | 0.8633 | -0.1100 | 0.0992 | 0.3044 | 3.1710  | 0.9232 | 715.2110 |
| CardioEmbolicStroke | s_Bacteroides_dorei         | Inverse variance weighted | 9 | -0.0091 | 0.0595 | 0.8783 | -0.1100 | 0.0992 | 0.3044 | 3.1710  | 0.9232 | 715.2110 |
| CardioEmbolicStroke | s_Bacteroides_dorei         | Simple mode               | 9 | 0.0218  | 0.1145 | 0.8534 | -0.1100 | 0.0992 | 0.3044 | 3.1710  | 0.9232 | 715.2110 |
| CardioEmbolicStroke | s_Bacteroides_dorei         | Weighted mode             | 9 | 0.0292  | 0.1091 | 0.7958 | -0.1100 | 0.0992 | 0.3044 | 3.1710  | 0.9232 | 715.2110 |
| CardioEmbolicStroke | s_Bacteroides_eggerthii     | MR Egger                  | 9 | 0.0525  | 0.4618 | 0.9127 | -0.0179 | 0.1178 | 0.8838 | 6.3874  | 0.4953 | 365.6341 |
| CardioEmbolicStroke | s_Bacteroides_eggerthii     | Weighted median           | 9 | -0.0117 | 0.0928 | 0.8995 | -0.0179 | 0.1178 | 0.8838 | 6.3874  | 0.4953 | 365.6341 |
| CardioEmbolicStroke | s_Bacteroides_eggerthii     | Inverse variance weighted | 9 | -0.0167 | 0.0706 | 0.8130 | -0.0179 | 0.1178 | 0.8838 | 6.3874  | 0.4953 | 365.6341 |
| CardioEmbolicStroke | s_Bacteroides_eggerthii     | Simple mode               | 9 | 0.0844  | 0.1536 | 0.5975 | -0.0179 | 0.1178 | 0.8838 | 6.3874  | 0.4953 | 365.6341 |
| CardioEmbolicStroke | s_Bacteroides_eggerthii     | Weighted mode             | 9 | 0.0154  | 0.1469 | 0.9189 | -0.0179 | 0.1178 | 0.8838 | 6.3874  | 0.4953 | 365.6341 |
| CardioEmbolicStroke | s_Bacteroides_finegoldii    | MR Egger                  | 9 | 0.0229  | 0.4107 | 0.9570 | 0.0062  | 0.1048 | 0.9544 | 3.8012  | 0.8024 | 480.2107 |
| CardioEmbolicStroke | s_Bacteroides_finegoldii    | Weighted median           | 9 | 0.0547  | 0.0830 | 0.5104 | 0.0062  | 0.1048 | 0.9544 | 3.8012  | 0.8024 | 480.2107 |
| CardioEmbolicStroke | s_Bacteroides_finegoldii    | Inverse variance weighted | 9 | 0.0470  | 0.0628 | 0.4542 | 0.0062  | 0.1048 | 0.9544 | 3.8012  | 0.8024 | 480.2107 |
| CardioEmbolicStroke | s_Bacteroides_finegoldii    | Simple mode               | 9 | 0.1259  | 0.1356 | 0.3804 | 0.0062  | 0.1048 | 0.9544 | 3.8012  | 0.8024 | 480.2107 |
| CardioEmbolicStroke | s_Bacteroides_finegoldii    | Weighted mode             | 9 | 0.0949  | 0.1153 | 0.4341 | 0.0062  | 0.1048 | 0.9544 | 3.8012  | 0.8024 | 480.2107 |
| CardioEmbolicStroke | s_Bacteroides_fluxus        | MR Egger                  | 9 | 0.5171  | 0.4086 | 0.2462 | -0.1169 | 0.1043 | 0.2992 | 8.0399  | 0.4296 | 250.7722 |
| CardioEmbolicStroke | s_Bacteroides_fluxus        | Weighted median           | 9 | 0.0296  | 0.0869 | 0.7333 | -0.1169 | 0.1043 | 0.2992 | 8.0399  | 0.4296 | 250.7722 |
| CardioEmbolicStroke | s_Bacteroides_fluxus        | Inverse variance weighted | 9 | 0.0644  | 0.0626 | 0.3039 | -0.1169 | 0.1043 | 0.2992 | 8.0399  | 0.4296 | 250.7722 |
| CardioEmbolicStroke | s_Bacteroides_fluxus        | Simple mode               | 9 | 0.1610  | 0.1371 | 0.2741 | -0.1169 | 0.1043 | 0.2992 | 8.0399  | 0.4296 | 250.7722 |
| CardioEmbolicStroke | s_Bacteroides_fluxus        | Weighted mode             | 9 | -0.0388 | 0.1370 | 0.7844 | -0.1169 | 0.1043 | 0.2992 | 8.0399  | 0.4296 | 250.7722 |
| CardioEmbolicStroke | s_Bacteroides_fragilis      | MR Egger                  | 9 | -0.1719 | 0.6169 | 0.7886 | 0.0608  | 0.1574 | 0.7109 | 11.6952 | 0.1110 | 188.7499 |
| CardioEmbolicStroke | s_Bacteroides_fragilis      | Weighted median           | 9 | -0.0329 | 0.1041 | 0.7518 | 0.0608  | 0.1574 | 0.7109 | 11.6952 | 0.1110 | 188.7499 |
| CardioEmbolicStroke | s_Bacteroides_fragilis      | Inverse variance weighted | 9 | 0.0634  | 0.0891 | 0.4768 | 0.0608  | 0.1574 | 0.7109 | 11.6952 | 0.1110 | 188.7499 |
| CardioEmbolicStroke | s_Bacteroides_fragilis      | Simple mode               | 9 | -0.0368 | 0.1917 | 0.8524 | 0.0608  | 0.1574 | 0.7109 | 11.6952 | 0.1110 | 188.7499 |
| CardioEmbolicStroke | s_Bacteroides_fragilis      | Weighted mode             | 9 | -0.0590 | 0.1381 | 0.6808 | 0.0608  | 0.1574 | 0.7109 | 11.6952 | 0.1110 | 188.7499 |
| CardioEmbolicStroke | s_Bacteroides_helcogenes    | MR Egger                  | 9 | -0.0538 | 0.7837 | 0.9472 | 0.0409  | 0.1999 | 0.8438 | 19.0906 | 0.0079 | 117.9022 |
| CardioEmbolicStroke | s_Bacteroides_helcogenes    | Weighted median           | 9 | -0.0020 | 0.1059 | 0.9852 | 0.0409  | 0.1999 | 0.8438 | 19.0906 | 0.0079 | 117.9022 |
| CardioEmbolicStroke | s_Bacteroides_helcogenes    | Inverse variance weighted | 9 | 0.1046  | 0.1124 | 0.3521 | 0.0409  | 0.1999 | 0.8438 | 19.0906 | 0.0079 | 117.9022 |
| CardioEmbolicStroke | s_Bacteroides_helcogenes    | Simple mode               | 9 | 0.1310  | 0.1937 | 0.5180 | 0.0409  | 0.1999 | 0.8438 | 19.0906 | 0.0079 | 117.9022 |
| CardioEmbolicStroke | s_Bacteroides_helcogenes    | Weighted mode             | 9 | -0.0700 | 0.1486 | 0.6501 | 0.0409  | 0.1999 | 0.8438 | 19.0906 | 0.0079 | 117.9022 |
| CardioEmbolicStroke | s_Bacteroides_intestinalis  | MR Egger                  | 9 | 0.6692  | 0.4963 | 0.2196 | -0.1584 | 0.1266 | 0.2510 | 8.3139  | 0.4034 | 217.1311 |
| CardioEmbolicStroke | s_Bacteroides_intestinalis  | Weighted median           | 9 | 0.0407  | 0.1016 | 0.6886 | -0.1584 | 0.1266 | 0.2510 | 8.3139  | 0.4034 | 217.1311 |
| CardioEmbolicStroke | s_Bacteroides_intestinalis  | Inverse variance weighted | 9 | 0.0554  | 0.0773 | 0.4738 | -0.1584 | 0.1266 | 0.2510 | 8.3139  | 0.4034 | 217.1311 |
| CardioEmbolicStroke | s_Bacteroides_intestinalis  | Simple mode               | 9 | 0.0690  | 0.1561 | 0.6703 | -0.1584 | 0.1266 | 0.2510 | 8.3139  | 0.4034 | 217.1311 |
| CardioEmbolicStroke | s_Bacteroides_intestinalis  | Weighted mode             | 9 | 0.0555  | 0.1405 | 0.7034 | -0.1584 | 0.1266 | 0.2510 | 8.3139  | 0.4034 | 217.1311 |
| CardioEmbolicStroke | s_Bacteroides_ovatus        | MR Egger                  | 9 | -0.2256 | 0.3985 | 0.5889 | 0.0721  | 0.1016 | 0.5008 | 12.1415 | 0.0960 | 392.3170 |
| CardioEmbolicStroke | s_Bacteroides_ovatus        | Weighted median           | 9 | -0.0090 | 0.0653 | 0.8902 | 0.0721  | 0.1016 | 0.5008 | 12.1415 | 0.0960 | 392.3170 |
| CardioEmbolicStroke | s_Bacteroides_ovatus        | Inverse variance weighted | 9 | 0.0539  | 0.0590 | 0.3612 | 0.0721  | 0.1016 | 0.5008 | 12.1415 | 0.0960 | 392.3170 |
| CardioEmbolicStroke | s_Bacteroides_ovatus        | Simple mode               | 9 | -0.0496 | 0.1101 | 0.6642 | 0.0721  | 0.1016 | 0.5008 | 12.1415 | 0.0960 | 392.3170 |
| CardioEmbolicStroke | s_Bacteroides_ovatus        | Weighted mode             | 9 | -0.0562 | 0.0907 | 0.5526 | 0.0721  | 0.1016 | 0.5008 | 12.1415 | 0.0960 | 392.3170 |
| CardioEmbolicStroke | s_Bacteroides_pectinophilus | MR Egger                  | 9 | 0.5761  | 0.3896 | 0.1827 | -0.1484 | 0.0994 | 0.1791 | 15.2177 | 0.0550 | NA       |
| CardioEmbolicStroke | s_Bacteroides_pectinophilus | Weighted median           | 9 | 0.0118  | 0.0654 | 0.8574 | -0.1484 | 0.0994 | 0.1791 | 15.2177 | 0.0550 | NA       |
| CardioEmbolicStroke | s_Bacteroides_pectinophilus | Inverse variance weighted | 9 | 0.0013  | 0.0640 | 0.9834 | -0.1484 | 0.0994 | 0.1791 | 15.2177 | 0.0550 | NA       |
| CardioEmbolicStroke | s_Bacteroides_pectinophilus | Simple mode               | 9 | 0.1390  | 0.1266 | 0.3043 | -0.1484 | 0.0994 | 0.1791 | 15.2177 | 0.0550 | NA       |
| CardioEmbolicStroke | s_Bacteroides_pectinophilus | Weighted mode             | 9 | 0.1440  | 0.1319 | 0.3067 | -0.1484 | 0.0994 | 0.1791 | 15.2177 | 0.0550 | NA       |
| CardioEmbolicStroke | s_Bacteroides_plebeius      | MR Egger                  | 9 | -0.6614 | 0.7939 | 0.4323 | 0.1566  | 0.2025 | 0.4647 | 7.3499  | 0.3934 | 106.9669 |
| CardioEmbolicStroke | s_Bacteroides_plebeius      | Weighted median           | 9 | 0.0456  | 0.1523 | 0.7644 | 0.1566  | 0.2025 | 0.4647 | 7.3499  | 0.3934 | 106.9669 |
| CardioEmbolicStroke | s_Bacteroides_plebeius      | Inverse variance weighted | 9 | -0.0547 | 0.1184 | 0.6439 | 0.1566  | 0.2025 | 0.4647 | 7.3499  | 0.3934 | 106.9669 |
| CardioEmbolicStroke | s_Bacteroides_plebeius      | Simple mode               | 9 | 0.0785  | 0.2691 | 0.7779 | 0.1566  | 0.2025 | 0.4647 | 7.3499  | 0.3934 | 106.9669 |
| CardioEmbolicStroke | s_Bacteroides_plebeius      | Weighted mode             | 9 | 0.0464  | 0.2426 | 0.8532 | 0.1566  | 0.2025 | 0.4647 | 7.3499  | 0.3934 | 106.9669 |
| CardioEmbolicStroke | s_Bacteroides_salanitronis  | MR Egger                  | 9 | 0.1656  | 0.3721 | 0.6697 | -0.0285 | 0.0949 | 0.7728 | 9.1207  | 0.2441 | 443.3563 |

|                     |                                                                         |                           |   |         |        |        |         |        |        |         |        |          |
|---------------------|-------------------------------------------------------------------------|---------------------------|---|---------|--------|--------|---------|--------|--------|---------|--------|----------|
| CardioEmbolicStroke | s_Bacteroides_salanitronis                                              | Weighted median           | 9 | 0.1091  | 0.0673 | 0.1051 | -0.0285 | 0.0949 | 0.7728 | 9.1207  | 0.2441 | 443.3563 |
| CardioEmbolicStroke | s_Bacteroides_salanitronis                                              | Inverse variance weighted | 9 | 0.0552  | 0.0535 | 0.3020 | -0.0285 | 0.0949 | 0.7728 | 9.1207  | 0.2441 | 443.3563 |
| CardioEmbolicStroke | s_Bacteroides_salanitronis                                              | Simple mode               | 9 | 0.1702  | 0.1231 | 0.2042 | -0.0285 | 0.0949 | 0.7728 | 9.1207  | 0.2441 | 443.3563 |
| CardioEmbolicStroke | s_Bacteroides_salanitronis                                              | Weighted mode             | 9 | 0.1735  | 0.1126 | 0.1620 | -0.0285 | 0.0949 | 0.7728 | 9.1207  | 0.2441 | 443.3563 |
| CardioEmbolicStroke | s_Bacteroides_stercoris                                                 | MR Egger                  | 9 | 0.1853  | 0.6441 | 0.7820 | -0.0484 | 0.1643 | 0.7767 | 5.1252  | 0.6447 | 206.2400 |
| CardioEmbolicStroke | s_Bacteroides_stercoris                                                 | Weighted median           | 9 | -0.0069 | 0.1279 | 0.9571 | -0.0484 | 0.1643 | 0.7767 | 5.1252  | 0.6447 | 206.2400 |
| CardioEmbolicStroke | s_Bacteroides_stercoris                                                 | Inverse variance weighted | 9 | -0.0024 | 0.0984 | 0.9808 | -0.0484 | 0.1643 | 0.7767 | 5.1252  | 0.6447 | 206.2400 |
| CardioEmbolicStroke | s_Bacteroides_stercoris                                                 | Simple mode               | 9 | 0.0150  | 0.2111 | 0.9453 | -0.0484 | 0.1643 | 0.7767 | 5.1252  | 0.6447 | 206.2400 |
| CardioEmbolicStroke | s_Bacteroides_stercoris                                                 | Weighted mode             | 9 | 0.0053  | 0.2002 | 0.9795 | -0.0484 | 0.1643 | 0.7767 | 5.1252  | 0.6447 | 206.2400 |
| CardioEmbolicStroke | s_Bacteroides_thetaiotaomicron                                          | MR Egger                  | 9 | 0.1563  | 0.5992 | 0.8017 | -0.0247 | 0.1529 | 0.8761 | 22.3356 | 0.0022 | 152.5007 |
| CardioEmbolicStroke | s_Bacteroides_thetaiotaomicron                                          | Weighted median           | 9 | -0.0082 | 0.0787 | 0.9174 | -0.0247 | 0.1529 | 0.8761 | 22.3356 | 0.0022 | 152.5007 |
| CardioEmbolicStroke | s_Bacteroides_thetaiotaomicron                                          | Inverse variance weighted | 9 | 0.0606  | 0.0859 | 0.4807 | -0.0247 | 0.1529 | 0.8761 | 22.3356 | 0.0022 | 152.5007 |
| CardioEmbolicStroke | s_Bacteroides_thetaiotaomicron                                          | Simple mode               | 9 | 0.0863  | 0.1379 | 0.5490 | -0.0247 | 0.1529 | 0.8761 | 22.3356 | 0.0022 | 152.5007 |
| CardioEmbolicStroke | s_Bacteroides_thetaiotaomicron                                          | Weighted mode             | 9 | -0.0095 | 0.1078 | 0.9320 | -0.0247 | 0.1529 | 0.8761 | 22.3356 | 0.0022 | 152.5007 |
| CardioEmbolicStroke | s_Bacteroides_uniformis                                                 | MR Egger                  | 9 | 0.3332  | 0.4489 | 0.4821 | -0.0593 | 0.1145 | 0.6204 | 8.3087  | 0.3062 | 215.9436 |
| CardioEmbolicStroke | s_Bacteroides_uniformis                                                 | Weighted median           | 9 | 0.1575  | 0.0900 | 0.0802 | -0.0593 | 0.1145 | 0.6204 | 8.3087  | 0.3062 | 215.9436 |
| CardioEmbolicStroke | s_Bacteroides_uniformis                                                 | Inverse variance weighted | 9 | 0.1034  | 0.0654 | 0.1141 | -0.0593 | 0.1145 | 0.6204 | 8.3087  | 0.3062 | 215.9436 |
| CardioEmbolicStroke | s_Bacteroides_uniformis                                                 | Simple mode               | 9 | 0.1880  | 0.1566 | 0.2645 | -0.0593 | 0.1145 | 0.6204 | 8.3087  | 0.3062 | 215.9436 |
| CardioEmbolicStroke | s_Bacteroides_uniformis                                                 | Weighted mode             | 9 | 0.1880  | 0.1512 | 0.2491 | -0.0593 | 0.1145 | 0.6204 | 8.3087  | 0.3062 | 215.9436 |
| CardioEmbolicStroke | s_Bacteroides_xylanisolvens                                             | MR Egger                  | 9 | 0.2160  | 0.4321 | 0.6325 | -0.0265 | 0.1102 | 0.8167 | 10.9472 | 0.1409 | 256.6422 |
| CardioEmbolicStroke | s_Bacteroides_xylanisolvens                                             | Weighted median           | 9 | 0.0598  | 0.0773 | 0.4391 | -0.0265 | 0.1102 | 0.8167 | 10.9472 | 0.1409 | 256.6422 |
| CardioEmbolicStroke | s_Bacteroides_xylanisolvens                                             | Inverse variance weighted | 9 | 0.1132  | 0.0620 | 0.0680 | -0.0265 | 0.1102 | 0.8167 | 10.9472 | 0.1409 | 256.6422 |
| CardioEmbolicStroke | s_Bacteroides_xylanisolvens                                             | Simple mode               | 9 | 0.2853  | 0.1446 | 0.0839 | -0.0265 | 0.1102 | 0.8167 | 10.9472 | 0.1409 | 256.6422 |
| CardioEmbolicStroke | s_Bacteroides_xylanisolvens                                             | Weighted mode             | 9 | -0.0216 | 0.1243 | 0.8661 | -0.0265 | 0.1102 | 0.8167 | 10.9472 | 0.1409 | 256.6422 |
| CardioEmbolicStroke | s_Bifidobacterium_adolescentis                                          | MR Egger                  | 9 | -0.0911 | 0.9828 | 0.9287 | 0.0132  | 0.2507 | 0.9594 | 8.7517  | 0.2710 | 61.7061  |
| CardioEmbolicStroke | s_Bifidobacterium_adolescentis                                          | Weighted median           | 9 | 0.1370  | 0.1887 | 0.4678 | 0.0132  | 0.2507 | 0.9594 | 8.7517  | 0.2710 | 61.7061  |
| CardioEmbolicStroke | s_Bifidobacterium_adolescentis                                          | Inverse variance weighted | 9 | -0.0399 | 0.1405 | 0.7767 | 0.0132  | 0.2507 | 0.9594 | 8.7517  | 0.2710 | 61.7061  |
| CardioEmbolicStroke | s_Bifidobacterium_adolescentis                                          | Simple mode               | 9 | 0.2046  | 0.3000 | 0.5146 | 0.0132  | 0.2507 | 0.9594 | 8.7517  | 0.2710 | 61.7061  |
| CardioEmbolicStroke | s_Bifidobacterium_adolescentis                                          | Weighted mode             | 9 | 0.2046  | 0.2635 | 0.4599 | 0.0132  | 0.2507 | 0.9594 | 8.7517  | 0.2710 | 61.7061  |
| CardioEmbolicStroke | s_Bifidobacterium_animalis                                              | MR Egger                  | 9 | 1.3254  | 0.5801 | 0.0563 | -0.3369 | 0.1480 | 0.0570 | 9.3662  | 0.3123 | 159.5536 |
| CardioEmbolicStroke | s_Bifidobacterium_animalis                                              | Weighted median           | 9 | 0.1083  | 0.1212 | 0.3716 | -0.3369 | 0.1480 | 0.0570 | 9.3662  | 0.3123 | 159.5536 |
| CardioEmbolicStroke | s_Bifidobacterium_animalis                                              | Inverse variance weighted | 9 | 0.0205  | 0.0960 | 0.8310 | -0.3369 | 0.1480 | 0.0570 | 9.3662  | 0.3123 | 159.5536 |
| CardioEmbolicStroke | s_Bifidobacterium_animalis                                              | Simple mode               | 9 | 0.1449  | 0.1935 | 0.4756 | -0.3369 | 0.1480 | 0.0570 | 9.3662  | 0.3123 | 159.5536 |
| CardioEmbolicStroke | s_Bifidobacterium_animalis                                              | Weighted mode             | 9 | 0.1449  | 0.1656 | 0.4072 | -0.3369 | 0.1480 | 0.0570 | 9.3662  | 0.3123 | 159.5536 |
| CardioEmbolicStroke | s_Bifidobacterium_bifidum                                               | MR Egger                  | 9 | -0.0481 | 1.0699 | 0.9654 | 0.0353  | 0.2729 | 0.9006 | 10.5615 | 0.1589 | 81.3928  |
| CardioEmbolicStroke | s_Bifidobacterium_bifidum                                               | Weighted median           | 9 | 0.1875  | 0.1882 | 0.3193 | 0.0353  | 0.2729 | 0.9006 | 10.5615 | 0.1589 | 81.3928  |
| CardioEmbolicStroke | s_Bifidobacterium_bifidum                                               | Inverse variance weighted | 9 | 0.0887  | 0.1531 | 0.5622 | 0.0353  | 0.2729 | 0.9006 | 10.5615 | 0.1589 | 81.3928  |
| CardioEmbolicStroke | s_Bifidobacterium_bifidum                                               | Simple mode               | 9 | 0.1588  | 0.3180 | 0.6308 | 0.0353  | 0.2729 | 0.9006 | 10.5615 | 0.1589 | 81.3928  |
| CardioEmbolicStroke | s_Bifidobacterium_bifidum                                               | Weighted mode             | 9 | 0.1754  | 0.3111 | 0.5883 | 0.0353  | 0.2729 | 0.9006 | 10.5615 | 0.1589 | 81.3928  |
| CardioEmbolicStroke | s_Bifidobacterium_breve                                                 | MR Egger                  | 9 | 0.6415  | 0.5876 | 0.3111 | -0.1727 | 0.1499 | 0.2871 | 4.9896  | 0.7587 | 244.6347 |
| CardioEmbolicStroke | s_Bifidobacterium_breve                                                 | Weighted median           | 9 | -0.0399 | 0.1192 | 0.7377 | -0.1727 | 0.1499 | 0.2871 | 4.9896  | 0.7587 | 244.6347 |
| CardioEmbolicStroke | s_Bifidobacterium_breve                                                 | Inverse variance weighted | 9 | -0.0274 | 0.0898 | 0.7600 | -0.1727 | 0.1499 | 0.2871 | 4.9896  | 0.7587 | 244.6347 |
| CardioEmbolicStroke | s_Bifidobacterium_breve                                                 | Simple mode               | 9 | -0.0517 | 0.1717 | 0.7711 | -0.1727 | 0.1499 | 0.2871 | 4.9896  | 0.7587 | 244.6347 |
| CardioEmbolicStroke | s_Bifidobacterium_breve                                                 | Weighted mode             | 9 | -0.0517 | 0.1636 | 0.7602 | -0.1727 | 0.1499 | 0.2871 | 4.9896  | 0.7587 | 244.6347 |
| CardioEmbolicStroke | s_Bifidobacterium_catenulatum-Bifidobacterium_pseudocatenulatum_complex | MR Egger                  | 9 | 0.3996  | 0.6230 | 0.5416 | -0.0950 | 0.1589 | 0.5687 | 5.9200  | 0.5491 | 272.7550 |
| CardioEmbolicStroke | s_Bifidobacterium_catenulatum-Bifidobacterium_pseudocatenulatum_complex | Weighted median           | 9 | 0.0380  | 0.1226 | 0.7570 | -0.0950 | 0.1589 | 0.5687 | 5.9200  | 0.5491 | 272.7550 |
| CardioEmbolicStroke | s_Bifidobacterium_catenulatum-Bifidobacterium_pseudocatenulatum_complex | Inverse variance weighted | 9 | 0.0315  | 0.0952 | 0.7411 | -0.0950 | 0.1589 | 0.5687 | 5.9200  | 0.5491 | 272.7550 |
| CardioEmbolicStroke | s_Bifidobacterium_catenulatum-Bifidobacterium_pseudocatenulatum_complex | Simple mode               | 9 | 0.0351  | 0.1717 | 0.8431 | -0.0950 | 0.1589 | 0.5687 | 5.9200  | 0.5491 | 272.7550 |
| CardioEmbolicStroke | s_Bifidobacterium_catenulatum-Bifidobacterium_pseudocatenulatum_complex | Weighted mode             | 9 | 0.0376  | 0.1605 | 0.8209 | -0.0950 | 0.1589 | 0.5687 | 5.9200  | 0.5491 | 272.7550 |
| CardioEmbolicStroke | s_Bifidobacterium_longum                                                | MR Egger                  | 9 | 0.0696  | 0.5293 | 0.8990 | -0.0422 | 0.1350 | 0.7637 | 3.2199  | 0.8639 | 423.5509 |
| CardioEmbolicStroke | s_Bifidobacterium_longum                                                | Weighted median           | 9 | -0.0783 | 0.1023 | 0.4438 | -0.0422 | 0.1350 | 0.7637 | 3.2199  | 0.8639 | 423.5509 |
| CardioEmbolicStroke | s_Bifidobacterium_longum                                                | Inverse variance weighted | 9 | -0.0939 | 0.0809 | 0.2457 | -0.0422 | 0.1350 | 0.7637 | 3.2199  | 0.8639 | 423.5509 |
| CardioEmbolicStroke | s_Bifidobacterium_longum                                                | Simple mode               | 9 | 0.0331  | 0.1562 | 0.8374 | -0.0422 | 0.1350 | 0.7637 | 3.2199  | 0.8639 | 423.5509 |
| CardioEmbolicStroke | s_Bifidobacterium_longum                                                | Weighted mode             | 9 | -0.1860 | 0.1454 | 0.2367 | -0.0422 | 0.1350 | 0.7637 | 3.2199  | 0.8639 | 423.5509 |
| CardioEmbolicStroke | s_Bilophila_wadsworthia                                                 | MR Egger                  | 9 | -0.4657 | 0.5878 | 0.4541 | 0.1036  | 0.1499 | 0.5117 | 8.3373  | 0.3038 | 160.5320 |
| CardioEmbolicStroke | s_Bilophila_wadsworthia                                                 | Weighted median           | 9 | 0.0284  | 0.1161 | 0.8065 | 0.1036  | 0.1499 | 0.5117 | 8.3373  | 0.3038 | 160.5320 |
| CardioEmbolicStroke | s_Bilophila_wadsworthia                                                 | Inverse variance weighted | 9 | -0.0643 | 0.0869 | 0.4594 | 0.1036  | 0.1499 | 0.5117 | 8.3373  | 0.3038 | 160.5320 |
| CardioEmbolicStroke | s_Bilophila_wadsworthia                                                 | Simple mode               | 9 | 0.0316  | 0.1870 | 0.8701 | 0.1036  | 0.1499 | 0.5117 | 8.3373  | 0.3038 | 160.5320 |
| CardioEmbolicStroke | s_Bilophila_wadsworthia                                                 | Weighted mode             | 9 | 0.0455  | 0.1633 | 0.7875 | 0.1036  | 0.1499 | 0.5117 | 8.3373  | 0.3038 | 160.5320 |
| CardioEmbolicStroke | s_Blautia_hansenii                                                      | MR Egger                  | 9 | 0.2340  | 0.2875 | 0.4425 | -0.0558 | 0.0734 | 0.4719 | 10.3079 | 0.1718 | 601.3720 |
| CardioEmbolicStroke | s_Blautia_hansenii                                                      | Weighted median           | 9 | 0.0289  | 0.0497 | 0.5605 | -0.0558 | 0.0734 | 0.4719 | 10.3079 | 0.1718 | 601.3720 |

|                     |                                 |                           |   |         |        |        |         |        |        |         |        |          |
|---------------------|---------------------------------|---------------------------|---|---------|--------|--------|---------|--------|--------|---------|--------|----------|
| CardioEmbolicStroke | s_Blautia_hansenii              | Inverse variance weighted | 9 | 0.0179  | 0.0428 | 0.6750 | -0.0558 | 0.0734 | 0.4719 | 10.3079 | 0.1718 | 601.3720 |
| CardioEmbolicStroke | s_Blautia_hansenii              | Simple mode               | 9 | 0.0132  | 0.0756 | 0.8658 | -0.0558 | 0.0734 | 0.4719 | 10.3079 | 0.1718 | 601.3720 |
| CardioEmbolicStroke | s_Blautia_hansenii              | Weighted mode             | 9 | 0.0148  | 0.0654 | 0.8260 | -0.0558 | 0.0734 | 0.4719 | 10.3079 | 0.1718 | 601.3720 |
| CardioEmbolicStroke | s_Blautia_hydrogenotrophica     | MR Egger                  | 9 | 0.1069  | 0.3224 | 0.7500 | -0.0265 | 0.0823 | 0.7565 | 10.0525 | 0.1856 | 649.6578 |
| CardioEmbolicStroke | s_Blautia_hydrogenotrophica     | Weighted median           | 9 | -0.0089 | 0.0577 | 0.8770 | -0.0265 | 0.0823 | 0.7565 | 10.0525 | 0.1856 | 649.6578 |
| CardioEmbolicStroke | s_Blautia_hydrogenotrophica     | Inverse variance weighted | 9 | 0.0041  | 0.0464 | 0.9294 | -0.0265 | 0.0823 | 0.7565 | 10.0525 | 0.1856 | 649.6578 |
| CardioEmbolicStroke | s_Blautia_hydrogenotrophica     | Simple mode               | 9 | -0.0490 | 0.0941 | 0.6168 | -0.0265 | 0.0823 | 0.7565 | 10.0525 | 0.1856 | 649.6578 |
| CardioEmbolicStroke | s_Blautia_hydrogenotrophica     | Weighted mode             | 9 | -0.0091 | 0.0836 | 0.9160 | -0.0265 | 0.0823 | 0.7565 | 10.0525 | 0.1856 | 649.6578 |
| CardioEmbolicStroke | s_Butyriivibrio_crossotus       | MR Egger                  | 9 | 0.7255  | 0.3573 | 0.0818 | -0.1576 | 0.0912 | 0.1275 | 11.0709 | 0.1977 | 281.8672 |
| CardioEmbolicStroke | s_Butyriivibrio_crossotus       | Weighted median           | 9 | 0.0806  | 0.0751 | 0.2827 | -0.1576 | 0.0912 | 0.1275 | 11.0709 | 0.1977 | 281.8672 |
| CardioEmbolicStroke | s_Butyriivibrio_crossotus       | Inverse variance weighted | 9 | 0.1151  | 0.0610 | 0.0592 | -0.1576 | 0.0912 | 0.1275 | 11.0709 | 0.1977 | 281.8672 |
| CardioEmbolicStroke | s_Butyriivibrio_crossotus       | Simple mode               | 9 | 0.2416  | 0.1349 | 0.1111 | -0.1576 | 0.0912 | 0.1275 | 11.0709 | 0.1977 | 281.8672 |
| CardioEmbolicStroke | s_Butyriivibrio_crossotus       | Weighted mode             | 9 | 0.2207  | 0.1333 | 0.1365 | -0.1576 | 0.0912 | 0.1275 | 11.0709 | 0.1977 | 281.8672 |
| CardioEmbolicStroke | s_Campylobacter_jejuni          | MR Egger                  | 9 | 0.0470  | 0.4040 | 0.9106 | -0.0299 | 0.1031 | 0.7802 | 3.6867  | 0.8151 | 594.6705 |
| CardioEmbolicStroke | s_Campylobacter_jejuni          | Weighted median           | 9 | -0.0295 | 0.0805 | 0.7141 | -0.0299 | 0.1031 | 0.7802 | 3.6867  | 0.8151 | 594.6705 |
| CardioEmbolicStroke | s_Campylobacter_jejuni          | Inverse variance weighted | 9 | -0.0687 | 0.0617 | 0.2655 | -0.0299 | 0.1031 | 0.7802 | 3.6867  | 0.8151 | 594.6705 |
| CardioEmbolicStroke | s_Campylobacter_jejuni          | Simple mode               | 9 | -0.1774 | 0.1196 | 0.1765 | -0.0299 | 0.1031 | 0.7802 | 3.6867  | 0.8151 | 594.6705 |
| CardioEmbolicStroke | s_Campylobacter_jejuni          | Weighted mode             | 9 | -0.0297 | 0.1105 | 0.7948 | -0.0299 | 0.1031 | 0.7802 | 3.6867  | 0.8151 | 594.6705 |
| CardioEmbolicStroke | s_Citrobacter_koseri            | MR Egger                  | 9 | 0.1794  | 0.5937 | 0.7713 | -0.0860 | 0.1515 | 0.5881 | 2.8498  | 0.8985 | 305.2823 |
| CardioEmbolicStroke | s_Citrobacter_koseri            | Weighted median           | 9 | -0.1523 | 0.1182 | 0.1975 | -0.0860 | 0.1515 | 0.5881 | 2.8498  | 0.8985 | 305.2823 |
| CardioEmbolicStroke | s_Citrobacter_koseri            | Inverse variance weighted | 9 | -0.1536 | 0.0908 | 0.0906 | -0.0860 | 0.1515 | 0.5881 | 2.8498  | 0.8985 | 305.2823 |
| CardioEmbolicStroke | s_Citrobacter_koseri            | Simple mode               | 9 | -0.1165 | 0.1763 | 0.5272 | -0.0860 | 0.1515 | 0.5881 | 2.8498  | 0.8985 | 305.2823 |
| CardioEmbolicStroke | s_Citrobacter_koseri            | Weighted mode             | 9 | -0.1283 | 0.1717 | 0.4764 | -0.0860 | 0.1515 | 0.5881 | 2.8498  | 0.8985 | 305.2823 |
| CardioEmbolicStroke | s_Citrobacter_youngae           | MR Egger                  | 9 | 0.0819  | 0.7455 | 0.9156 | -0.0727 | 0.1902 | 0.7136 | 5.7760  | 0.5661 | 146.6794 |
| CardioEmbolicStroke | s_Citrobacter_youngae           | Weighted median           | 9 | -0.2773 | 0.1552 | 0.0739 | -0.0727 | 0.1902 | 0.7136 | 5.7760  | 0.5661 | 146.6794 |
| CardioEmbolicStroke | s_Citrobacter_youngae           | Inverse variance weighted | 9 | -0.1997 | 0.1139 | 0.0796 | -0.0727 | 0.1902 | 0.7136 | 5.7760  | 0.5661 | 146.6794 |
| CardioEmbolicStroke | s_Citrobacter_youngae           | Simple mode               | 9 | -0.4080 | 0.2742 | 0.1751 | -0.0727 | 0.1902 | 0.7136 | 5.7760  | 0.5661 | 146.6794 |
| CardioEmbolicStroke | s_Citrobacter_youngae           | Weighted mode             | 9 | -0.4252 | 0.2788 | 0.1658 | -0.0727 | 0.1902 | 0.7136 | 5.7760  | 0.5661 | 146.6794 |
| CardioEmbolicStroke | s_Clostridiales_genomosp._BVAB3 | MR Egger                  | 9 | -0.1305 | 0.6813 | 0.8535 | 0.0358  | 0.1738 | 0.8425 | 2.5319  | 0.9247 | 472.7929 |
| CardioEmbolicStroke | s_Clostridiales_genomosp._BVAB3 | Weighted median           | 9 | -0.0348 | 0.1306 | 0.7897 | 0.0358  | 0.1738 | 0.8425 | 2.5319  | 0.9247 | 472.7929 |
| CardioEmbolicStroke | s_Clostridiales_genomosp._BVAB3 | Inverse variance weighted | 9 | 0.0083  | 0.1042 | 0.9363 | 0.0358  | 0.1738 | 0.8425 | 2.5319  | 0.9247 | 472.7929 |
| CardioEmbolicStroke | s_Clostridiales_genomosp._BVAB3 | Simple mode               | 9 | -0.0922 | 0.1899 | 0.6403 | 0.0358  | 0.1738 | 0.8425 | 2.5319  | 0.9247 | 472.7929 |
| CardioEmbolicStroke | s_Clostridiales_genomosp._BVAB3 | Weighted mode             | 9 | -0.0609 | 0.1800 | 0.7440 | 0.0358  | 0.1738 | 0.8425 | 2.5319  | 0.9247 | 472.7929 |
| CardioEmbolicStroke | s_Clostridium_bartlettii        | MR Egger                  | 9 | 0.7286  | 0.3907 | 0.1045 | -0.1726 | 0.0997 | 0.1269 | 8.9348  | 0.3478 | NA       |
| CardioEmbolicStroke | s_Clostridium_bartlettii        | Weighted median           | 9 | 0.1152  | 0.0784 | 0.1418 | -0.1726 | 0.0997 | 0.1269 | 8.9348  | 0.3478 | NA       |
| CardioEmbolicStroke | s_Clostridium_bartlettii        | Inverse variance weighted | 9 | 0.0599  | 0.0631 | 0.3426 | -0.1726 | 0.0997 | 0.1269 | 8.9348  | 0.3478 | NA       |
| CardioEmbolicStroke | s_Clostridium_bartlettii        | Simple mode               | 9 | 0.1247  | 0.1208 | 0.3322 | -0.1726 | 0.0997 | 0.1269 | 8.9348  | 0.3478 | NA       |
| CardioEmbolicStroke | s_Clostridium_bartlettii        | Weighted mode             | 9 | 0.1348  | 0.1110 | 0.2592 | -0.1726 | 0.0997 | 0.1269 | 8.9348  | 0.3478 | NA       |
| CardioEmbolicStroke | s_Clostridiumbolteae            | MR Egger                  | 9 | 0.4203  | 0.6015 | 0.5073 | -0.0776 | 0.1535 | 0.6286 | 10.5292 | 0.1605 | 127.5804 |
| CardioEmbolicStroke | s_Clostridiumbolteae            | Weighted median           | 9 | 0.0460  | 0.0977 | 0.6375 | -0.0776 | 0.1535 | 0.6286 | 10.5292 | 0.1605 | 127.5804 |
| CardioEmbolicStroke | s_Clostridiumbolteae            | Inverse variance weighted | 9 | 0.1197  | 0.0876 | 0.1719 | -0.0776 | 0.1535 | 0.6286 | 10.5292 | 0.1605 | 127.5804 |
| CardioEmbolicStroke | s_Clostridiumbolteae            | Simple mode               | 9 | -0.0773 | 0.1960 | 0.7037 | -0.0776 | 0.1535 | 0.6286 | 10.5292 | 0.1605 | 127.5804 |
| CardioEmbolicStroke | s_Clostridiumbolteae            | Weighted mode             | 9 | -0.0805 | 0.1587 | 0.6255 | -0.0776 | 0.1535 | 0.6286 | 10.5292 | 0.1605 | 127.5804 |
| CardioEmbolicStroke | s_Clostridiumdifficile          | MR Egger                  | 9 | 0.5101  | 0.2020 | 0.0395 | -0.1264 | 0.0515 | 0.0439 | 10.6658 | 0.2214 | NA       |
| CardioEmbolicStroke | s_Clostridiumdifficile          | Weighted median           | 9 | 0.0112  | 0.0444 | 0.8010 | -0.1264 | 0.0515 | 0.0439 | 10.6658 | 0.2214 | NA       |
| CardioEmbolicStroke | s_Clostridiumdifficile          | Inverse variance weighted | 9 | 0.0203  | 0.0356 | 0.5689 | -0.1264 | 0.0515 | 0.0439 | 10.6658 | 0.2214 | NA       |
| CardioEmbolicStroke | s_Clostridiumdifficile          | Simple mode               | 9 | -0.0581 | 0.0809 | 0.4926 | -0.1264 | 0.0515 | 0.0439 | 10.6658 | 0.2214 | NA       |
| CardioEmbolicStroke | s_Clostridiumdifficile          | Weighted mode             | 9 | 0.0168  | 0.0671 | 0.8087 | -0.1264 | 0.0515 | 0.0439 | 10.6658 | 0.2214 | NA       |
| CardioEmbolicStroke | s_Clostridiumleptum             | MR Egger                  | 9 | 0.4943  | 0.5246 | 0.3774 | -0.1438 | 0.1338 | 0.3181 | 8.9712  | 0.3447 | 274.2661 |
| CardioEmbolicStroke | s_Clostridiumleptum             | Weighted median           | 9 | -0.0795 | 0.1066 | 0.4560 | -0.1438 | 0.1338 | 0.3181 | 8.9712  | 0.3447 | 274.2661 |
| CardioEmbolicStroke | s_Clostridiumleptum             | Inverse variance weighted | 9 | -0.0628 | 0.0809 | 0.4375 | -0.1438 | 0.1338 | 0.3181 | 8.9712  | 0.3447 | 274.2661 |
| CardioEmbolicStroke | s_Clostridiumleptum             | Simple mode               | 9 | -0.1081 | 0.1803 | 0.5656 | -0.1438 | 0.1338 | 0.3181 | 8.9712  | 0.3447 | 274.2661 |
| CardioEmbolicStroke | s_Clostridiumleptum             | Weighted mode             | 9 | 0.0097  | 0.1535 | 0.9513 | -0.1438 | 0.1338 | 0.3181 | 8.9712  | 0.3447 | 274.2661 |
| CardioEmbolicStroke | s_Clostridium_methylpentosum    | MR Egger                  | 9 | 0.3446  | 0.4920 | 0.5063 | -0.0828 | 0.1255 | 0.5307 | 9.4919  | 0.2192 | 333.9598 |
| CardioEmbolicStroke | s_Clostridium_methylpentosum    | Weighted median           | 9 | 0.0049  | 0.0911 | 0.9570 | -0.0828 | 0.1255 | 0.5307 | 9.4919  | 0.2192 | 333.9598 |
| CardioEmbolicStroke | s_Clostridium_methylpentosum    | Inverse variance weighted | 9 | 0.0240  | 0.0725 | 0.7408 | -0.0828 | 0.1255 | 0.5307 | 9.4919  | 0.2192 | 333.9598 |
| CardioEmbolicStroke | s_Clostridium_methylpentosum    | Simple mode               | 9 | -0.0439 | 0.1390 | 0.7605 | -0.0828 | 0.1255 | 0.5307 | 9.4919  | 0.2192 | 333.9598 |
| CardioEmbolicStroke | s_Clostridium_methylpentosum    | Weighted mode             | 9 | -0.0287 | 0.1250 | 0.8239 | -0.0828 | 0.1255 | 0.5307 | 9.4919  | 0.2192 | 333.9598 |
| CardioEmbolicStroke | s_Clostridium_perfringens       | MR Egger                  | 9 | -0.5281 | 0.6350 | 0.4331 | 0.0994  | 0.1620 | 0.5591 | 5.7045  | 0.5746 | 123.7998 |
| CardioEmbolicStroke | s_Clostridium_perfringens       | Weighted median           | 9 | -0.0897 | 0.1258 | 0.4761 | 0.0994  | 0.1620 | 0.5591 | 5.7045  | 0.5746 | 123.7998 |
| CardioEmbolicStroke | s_Clostridium_perfringens       | Inverse variance weighted | 9 | -0.1432 | 0.0971 | 0.1401 | 0.0994  | 0.1620 | 0.5591 | 5.7045  | 0.5746 | 123.7998 |

|                     |                               |                           |   |         |        |        |         |        |        |         |        |          |
|---------------------|-------------------------------|---------------------------|---|---------|--------|--------|---------|--------|--------|---------|--------|----------|
| CardioEmbolicStroke | s_Clostridium_perfringens     | Simple mode               | 9 | -0.0987 | 0.2148 | 0.6579 | 0.0994  | 0.1620 | 0.5591 | 5.7045  | 0.5746 | 123.7998 |
| CardioEmbolicStroke | s_Clostridium_perfringens     | Weighted mode             | 9 | -0.0770 | 0.1907 | 0.6970 | 0.0994  | 0.1620 | 0.5591 | 5.7045  | 0.5746 | 123.7998 |
| CardioEmbolicStroke | s_Clostridium_amosum          | MR Egger                  | 9 | -0.0221 | 0.5535 | 0.9693 | 0.0268  | 0.1412 | 0.8548 | 7.5423  | 0.3747 | 211.2189 |
| CardioEmbolicStroke | s_Clostridium_amosum          | Weighted median           | 9 | -0.0052 | 0.1120 | 0.9630 | 0.0268  | 0.1412 | 0.8548 | 7.5423  | 0.3747 | 211.2189 |
| CardioEmbolicStroke | s_Clostridium_amosum          | Inverse variance weighted | 9 | 0.0818  | 0.0815 | 0.3157 | 0.0268  | 0.1412 | 0.8548 | 7.5423  | 0.3747 | 211.2189 |
| CardioEmbolicStroke | s_Clostridium_amosum          | Simple mode               | 9 | -0.0514 | 0.1687 | 0.7685 | 0.0268  | 0.1412 | 0.8548 | 7.5423  | 0.3747 | 211.2189 |
| CardioEmbolicStroke | s_Clostridium_amosum          | Weighted mode             | 9 | -0.0543 | 0.1452 | 0.7180 | 0.0268  | 0.1412 | 0.8548 | 7.5423  | 0.3747 | 211.2189 |
| CardioEmbolicStroke | s_Clostridium_saccharolyticum | MR Egger                  | 9 | 0.1931  | 0.3505 | 0.5988 | -0.0449 | 0.0894 | 0.6307 | 13.9721 | 0.0517 | 538.1095 |
| CardioEmbolicStroke | s_Clostridium_saccharolyticum | Weighted median           | 9 | -0.0076 | 0.0551 | 0.8897 | -0.0449 | 0.0894 | 0.6307 | 13.9721 | 0.0517 | 538.1095 |
| CardioEmbolicStroke | s_Clostridium_saccharolyticum | Inverse variance weighted | 9 | 0.0190  | 0.0510 | 0.7090 | -0.0449 | 0.0894 | 0.6307 | 13.9721 | 0.0517 | 538.1095 |
| CardioEmbolicStroke | s_Clostridium_saccharolyticum | Simple mode               | 9 | 0.0411  | 0.0902 | 0.6604 | -0.0449 | 0.0894 | 0.6307 | 13.9721 | 0.0517 | 538.1095 |
| CardioEmbolicStroke | s_Clostridium_saccharolyticum | Weighted mode             | 9 | 0.0125  | 0.0713 | 0.8656 | -0.0449 | 0.0894 | 0.6307 | 13.9721 | 0.0517 | 538.1095 |
| CardioEmbolicStroke | s_Clostridium_spiroforme      | MR Egger                  | 9 | 0.2872  | 0.5110 | 0.5917 | -0.0683 | 0.1304 | 0.6165 | 8.8404  | 0.2643 | 237.1823 |
| CardioEmbolicStroke | s_Clostridium_spiroforme      | Weighted median           | 9 | -0.0204 | 0.0989 | 0.8364 | -0.0683 | 0.1304 | 0.6165 | 8.8404  | 0.2643 | 237.1823 |
| CardioEmbolicStroke | s_Clostridium_spiroforme      | Inverse variance weighted | 9 | 0.0226  | 0.0745 | 0.7616 | -0.0683 | 0.1304 | 0.6165 | 8.8404  | 0.2643 | 237.1823 |
| CardioEmbolicStroke | s_Clostridium_spiroforme      | Simple mode               | 9 | 0.1585  | 0.1619 | 0.3565 | -0.0683 | 0.1304 | 0.6165 | 8.8404  | 0.2643 | 237.1823 |
| CardioEmbolicStroke | s_Clostridium_spiroforme      | Weighted mode             | 9 | -0.0777 | 0.1502 | 0.6190 | -0.0683 | 0.1304 | 0.6165 | 8.8404  | 0.2643 | 237.1823 |
| CardioEmbolicStroke | s_Collinsella_aerofaciens     | MR Egger                  | 9 | -0.7194 | 0.8128 | 0.4055 | 0.1960  | 0.2074 | 0.3761 | 5.2264  | 0.6324 | 161.4867 |
| CardioEmbolicStroke | s_Collinsella_aerofaciens     | Weighted median           | 9 | -0.0630 | 0.1676 | 0.7069 | 0.1960  | 0.2074 | 0.3761 | 5.2264  | 0.6324 | 161.4867 |
| CardioEmbolicStroke | s_Collinsella_aerofaciens     | Inverse variance weighted | 9 | 0.0397  | 0.1242 | 0.7493 | 0.1960  | 0.2074 | 0.3761 | 5.2264  | 0.6324 | 161.4867 |
| CardioEmbolicStroke | s_Collinsella_aerofaciens     | Simple mode               | 9 | -0.1231 | 0.2469 | 0.6315 | 0.1960  | 0.2074 | 0.3761 | 5.2264  | 0.6324 | 161.4867 |
| CardioEmbolicStroke | s_Collinsella_aerofaciens     | Weighted mode             | 9 | -0.0771 | 0.2177 | 0.7325 | 0.1960  | 0.2074 | 0.3761 | 5.2264  | 0.6324 | 161.4867 |
| CardioEmbolicStroke | s_Coprococcus_catus           | MR Egger                  | 9 | 0.3850  | 0.3866 | 0.3525 | -0.1028 | 0.0986 | 0.3321 | 15.5235 | 0.0497 | 443.0978 |
| CardioEmbolicStroke | s_Coprococcus_catus           | Weighted median           | 9 | -0.0074 | 0.0610 | 0.9031 | -0.1028 | 0.0986 | 0.3321 | 15.5235 | 0.0497 | 443.0978 |
| CardioEmbolicStroke | s_Coprococcus_catus           | Inverse variance weighted | 9 | -0.0131 | 0.0594 | 0.8256 | -0.1028 | 0.0986 | 0.3321 | 15.5235 | 0.0497 | 443.0978 |
| CardioEmbolicStroke | s_Coprococcus_catus           | Simple mode               | 9 | 0.0173  | 0.1096 | 0.8782 | -0.1028 | 0.0986 | 0.3321 | 15.5235 | 0.0497 | 443.0978 |
| CardioEmbolicStroke | s_Coprococcus_catus           | Weighted mode             | 9 | 0.0126  | 0.0818 | 0.8816 | -0.1028 | 0.0986 | 0.3321 | 15.5235 | 0.0497 | 443.0978 |
| CardioEmbolicStroke | s_Coprococcus_eutactus        | MR Egger                  | 9 | 0.4795  | 0.5369 | 0.4015 | -0.1044 | 0.1370 | 0.4709 | 8.3466  | 0.3030 | 269.4202 |
| CardioEmbolicStroke | s_Coprococcus_eutactus        | Weighted median           | 9 | 0.0923  | 0.1060 | 0.3839 | -0.1044 | 0.1370 | 0.4709 | 8.3466  | 0.3030 | 269.4202 |
| CardioEmbolicStroke | s_Coprococcus_eutactus        | Inverse variance weighted | 9 | 0.0751  | 0.0799 | 0.3469 | -0.1044 | 0.1370 | 0.4709 | 8.3466  | 0.3030 | 269.4202 |
| CardioEmbolicStroke | s_Coprococcus_eutactus        | Simple mode               | 9 | 0.2185  | 0.1570 | 0.2014 | -0.1044 | 0.1370 | 0.4709 | 8.3466  | 0.3030 | 269.4202 |
| CardioEmbolicStroke | s_Coprococcus_eutactus        | Weighted mode             | 9 | 0.2057  | 0.1468 | 0.1987 | -0.1044 | 0.1370 | 0.4709 | 8.3466  | 0.3030 | 269.4202 |
| CardioEmbolicStroke | s_Desulfovibrio_piger         | MR Egger                  | 9 | 0.4745  | 0.9826 | 0.6439 | -0.1222 | 0.2507 | 0.6409 | 3.3668  | 0.8491 | 196.0942 |
| CardioEmbolicStroke | s_Desulfovibrio_piger         | Weighted median           | 9 | -0.0344 | 0.1834 | 0.8513 | -0.1222 | 0.2507 | 0.6409 | 3.3668  | 0.8491 | 196.0942 |
| CardioEmbolicStroke | s_Desulfovibrio_piger         | Inverse variance weighted | 9 | 0.0012  | 0.1502 | 0.9936 | -0.1222 | 0.2507 | 0.6409 | 3.3668  | 0.8491 | 196.0942 |
| CardioEmbolicStroke | s_Desulfovibrio_piger         | Simple mode               | 9 | -0.2369 | 0.3068 | 0.4622 | -0.1222 | 0.2507 | 0.6409 | 3.3668  | 0.8491 | 196.0942 |
| CardioEmbolicStroke | s_Desulfovibrio_piger         | Weighted mode             | 9 | -0.2218 | 0.2995 | 0.4802 | -0.1222 | 0.2507 | 0.6409 | 3.3668  | 0.8491 | 196.0942 |
| CardioEmbolicStroke | s_Dorea_formicigenerans       | MR Egger                  | 9 | 0.7561  | 0.3381 | 0.0604 | -0.1978 | 0.0863 | 0.0556 | 18.0541 | 0.0208 | 316.4862 |
| CardioEmbolicStroke | s_Dorea_formicigenerans       | Weighted median           | 9 | -0.0248 | 0.0638 | 0.6974 | -0.1978 | 0.0863 | 0.0556 | 18.0541 | 0.0208 | 316.4862 |
| CardioEmbolicStroke | s_Dorea_formicigenerans       | Inverse variance weighted | 9 | -0.0101 | 0.0640 | 0.8751 | -0.1978 | 0.0863 | 0.0556 | 18.0541 | 0.0208 | 316.4862 |
| CardioEmbolicStroke | s_Dorea_formicigenerans       | Simple mode               | 9 | -0.1437 | 0.1282 | 0.2948 | -0.1978 | 0.0863 | 0.0556 | 18.0541 | 0.0208 | 316.4862 |
| CardioEmbolicStroke | s_Dorea_formicigenerans       | Weighted mode             | 9 | -0.1161 | 0.1271 | 0.3875 | -0.1978 | 0.0863 | 0.0556 | 18.0541 | 0.0208 | 316.4862 |
| CardioEmbolicStroke | s_Dorea_longicatena           | MR Egger                  | 9 | 0.2607  | 0.3441 | 0.4733 | -0.0795 | 0.0878 | 0.3950 | 5.5053  | 0.5985 | 572.2459 |
| CardioEmbolicStroke | s_Dorea_longicatena           | Weighted median           | 9 | -0.0426 | 0.0686 | 0.5349 | -0.0795 | 0.0878 | 0.3950 | 5.5053  | 0.5985 | 572.2459 |
| CardioEmbolicStroke | s_Dorea_longicatena           | Inverse variance weighted | 9 | -0.0474 | 0.0526 | 0.3676 | -0.0795 | 0.0878 | 0.3950 | 5.5053  | 0.5985 | 572.2459 |
| CardioEmbolicStroke | s_Dorea_longicatena           | Simple mode               | 9 | -0.0599 | 0.0945 | 0.5442 | -0.0795 | 0.0878 | 0.3950 | 5.5053  | 0.5985 | 572.2459 |
| CardioEmbolicStroke | s_Dorea_longicatena           | Weighted mode             | 9 | -0.0582 | 0.0902 | 0.5364 | -0.0795 | 0.0878 | 0.3950 | 5.5053  | 0.5985 | 572.2459 |
| CardioEmbolicStroke | s_Eggerthella_lenta           | MR Egger                  | 9 | 0.1529  | 0.8531 | 0.8629 | -0.0161 | 0.2176 | 0.9430 | 14.7009 | 0.0400 | 105.5652 |
| CardioEmbolicStroke | s_Eggerthella_lenta           | Weighted median           | 9 | 0.0290  | 0.1299 | 0.8231 | -0.0161 | 0.2176 | 0.9430 | 14.7009 | 0.0400 | 105.5652 |
| CardioEmbolicStroke | s_Eggerthella_lenta           | Inverse variance weighted | 9 | 0.0904  | 0.1220 | 0.4587 | -0.0161 | 0.2176 | 0.9430 | 14.7009 | 0.0400 | 105.5652 |
| CardioEmbolicStroke | s_Eggerthella_lenta           | Simple mode               | 9 | 0.0839  | 0.2122 | 0.7029 | -0.0161 | 0.2176 | 0.9430 | 14.7009 | 0.0400 | 105.5652 |
| CardioEmbolicStroke | s_Eggerthella_lenta           | Weighted mode             | 9 | 0.0351  | 0.1647 | 0.8364 | -0.0161 | 0.2176 | 0.9430 | 14.7009 | 0.0400 | 105.5652 |
| CardioEmbolicStroke | s_Enterobacter_aerogenes      | MR Egger                  | 9 | 0.0041  | 0.7821 | 0.9959 | -0.0661 | 0.1995 | 0.7501 | 6.0188  | 0.5376 | 85.6640  |
| CardioEmbolicStroke | s_Enterobacter_aerogenes      | Weighted median           | 9 | -0.2306 | 0.1567 | 0.1412 | -0.0661 | 0.1995 | 0.7501 | 6.0188  | 0.5376 | 85.6640  |
| CardioEmbolicStroke | s_Enterobacter_aerogenes      | Inverse variance weighted | 9 | -0.2520 | 0.1195 | 0.0350 | -0.0661 | 0.1995 | 0.7501 | 6.0188  | 0.5376 | 85.6640  |
| CardioEmbolicStroke | s_Enterobacter_aerogenes      | Simple mode               | 9 | -0.2605 | 0.2600 | 0.3458 | -0.0661 | 0.1995 | 0.7501 | 6.0188  | 0.5376 | 85.6640  |
| CardioEmbolicStroke | s_Enterobacter_aerogenes      | Weighted mode             | 9 | -0.2276 | 0.2477 | 0.3851 | -0.0661 | 0.1995 | 0.7501 | 6.0188  | 0.5376 | 85.6640  |
| CardioEmbolicStroke | s_Enterobacter_cloacae        | MR Egger                  | 9 | -0.0543 | 0.7100 | 0.9412 | -0.0078 | 0.1811 | 0.9669 | 5.4582  | 0.6042 | 214.3026 |
| CardioEmbolicStroke | s_Enterobacter_cloacae        | Weighted median           | 9 | -0.1407 | 0.1444 | 0.3299 | -0.0078 | 0.1811 | 0.9669 | 5.4582  | 0.6042 | 214.3026 |
| CardioEmbolicStroke | s_Enterobacter_cloacae        | Inverse variance weighted | 9 | -0.0845 | 0.1085 | 0.4362 | -0.0078 | 0.1811 | 0.9669 | 5.4582  | 0.6042 | 214.3026 |
| CardioEmbolicStroke | s_Enterobacter_cloacae        | Simple mode               | 9 | -0.1683 | 0.2216 | 0.4695 | -0.0078 | 0.1811 | 0.9669 | 5.4582  | 0.6042 | 214.3026 |

|                     |                            |                           |   |         |        |        |         |        |        |         |        |          |
|---------------------|----------------------------|---------------------------|---|---------|--------|--------|---------|--------|--------|---------|--------|----------|
| CardioEmbolicStroke | s_Enterobacter_cloacae     | Weighted mode             | 9 | -0.2014 | 0.2295 | 0.4057 | -0.0078 | 0.1811 | 0.9669 | 5.4582  | 0.6042 | 214.3026 |
| CardioEmbolicStroke | s_Enterococcus_faecalis    | MR Egger                  | 9 | 0.2582  | 0.2787 | 0.3851 | -0.0592 | 0.0711 | 0.4327 | 5.5146  | 0.5974 | 833.7705 |
| CardioEmbolicStroke | s_Enterococcus_faecalis    | Weighted median           | 9 | 0.0426  | 0.0583 | 0.4651 | -0.0592 | 0.0711 | 0.4327 | 5.5146  | 0.5974 | 833.7705 |
| CardioEmbolicStroke | s_Enterococcus_faecalis    | Inverse variance weighted | 9 | 0.0289  | 0.0426 | 0.4971 | -0.0592 | 0.0711 | 0.4327 | 5.5146  | 0.5974 | 833.7705 |
| CardioEmbolicStroke | s_Enterococcus_faecalis    | Simple mode               | 9 | 0.0345  | 0.0881 | 0.7057 | -0.0592 | 0.0711 | 0.4327 | 5.5146  | 0.5974 | 833.7705 |
| CardioEmbolicStroke | s_Enterococcus_faecalis    | Weighted mode             | 9 | 0.0434  | 0.0840 | 0.6196 | -0.0592 | 0.0711 | 0.4327 | 5.5146  | 0.5974 | 833.7705 |
| CardioEmbolicStroke | s_Enterococcus_faecium     | MR Egger                  | 9 | -0.0860 | 0.2774 | 0.7657 | -0.0004 | 0.0708 | 0.9952 | 4.2650  | 0.7488 | 595.4356 |
| CardioEmbolicStroke | s_Enterococcus_faecium     | Weighted median           | 9 | -0.0736 | 0.0550 | 0.1809 | -0.0004 | 0.0708 | 0.9952 | 4.2650  | 0.7488 | 595.4356 |
| CardioEmbolicStroke | s_Enterococcus_faecium     | Inverse variance weighted | 9 | -0.0876 | 0.0424 | 0.0387 | -0.0004 | 0.0708 | 0.9952 | 4.2650  | 0.7488 | 595.4356 |
| CardioEmbolicStroke | s_Enterococcus_faecium     | Simple mode               | 9 | -0.0660 | 0.0858 | 0.4642 | -0.0004 | 0.0708 | 0.9952 | 4.2650  | 0.7488 | 595.4356 |
| CardioEmbolicStroke | s_Enterococcus_faecium     | Weighted mode             | 9 | -0.0693 | 0.0784 | 0.4022 | -0.0004 | 0.0708 | 0.9952 | 4.2650  | 0.7488 | 595.4356 |
| CardioEmbolicStroke | s_Escherichia_coli         | MR Egger                  | 9 | 0.1809  | 0.5686 | 0.7596 | -0.0643 | 0.1451 | 0.6710 | 5.8793  | 0.5539 | 249.7496 |
| CardioEmbolicStroke | s_Escherichia_coli         | Weighted median           | 9 | -0.0807 | 0.1120 | 0.4717 | -0.0643 | 0.1451 | 0.6710 | 5.8793  | 0.5539 | 249.7496 |
| CardioEmbolicStroke | s_Escherichia_coli         | Inverse variance weighted | 9 | -0.0681 | 0.0869 | 0.4330 | -0.0643 | 0.1451 | 0.6710 | 5.8793  | 0.5539 | 249.7496 |
| CardioEmbolicStroke | s_Escherichia_coli         | Simple mode               | 9 | -0.0247 | 0.1886 | 0.8991 | -0.0643 | 0.1451 | 0.6710 | 5.8793  | 0.5539 | 249.7496 |
| CardioEmbolicStroke | s_Escherichia_coli         | Weighted mode             | 9 | -0.0766 | 0.1622 | 0.6492 | -0.0643 | 0.1451 | 0.6710 | 5.8793  | 0.5539 | 249.7496 |
| CardioEmbolicStroke | s_Eubacterium_biforme      | MR Egger                  | 9 | 0.2346  | 0.5301 | 0.6714 | -0.0646 | 0.1352 | 0.6475 | 2.9608  | 0.8886 | 555.0631 |
| CardioEmbolicStroke | s_Eubacterium_biforme      | Weighted median           | 9 | -0.0267 | 0.1026 | 0.7949 | -0.0646 | 0.1352 | 0.6475 | 2.9608  | 0.8886 | 555.0631 |
| CardioEmbolicStroke | s_Eubacterium_biforme      | Inverse variance weighted | 9 | -0.0155 | 0.0810 | 0.8478 | -0.0646 | 0.1352 | 0.6475 | 2.9608  | 0.8886 | 555.0631 |
| CardioEmbolicStroke | s_Eubacterium_biforme      | Simple mode               | 9 | -0.0617 | 0.1596 | 0.7090 | -0.0646 | 0.1352 | 0.6475 | 2.9608  | 0.8886 | 555.0631 |
| CardioEmbolicStroke | s_Eubacterium_biforme      | Weighted mode             | 9 | -0.0420 | 0.1424 | 0.7752 | -0.0646 | 0.1352 | 0.6475 | 2.9608  | 0.8886 | 555.0631 |
| CardioEmbolicStroke | s_Eubacterium_cylindroides | MR Egger                  | 9 | 0.3956  | 0.3382 | 0.2804 | -0.0948 | 0.0863 | 0.3082 | 12.0773 | 0.1478 | 455.4781 |
| CardioEmbolicStroke | s_Eubacterium_cylindroides | Weighted median           | 9 | 0.0971  | 0.0610 | 0.1115 | -0.0948 | 0.0863 | 0.3082 | 12.0773 | 0.1478 | 455.4781 |
| CardioEmbolicStroke | s_Eubacterium_cylindroides | Inverse variance weighted | 9 | 0.0283  | 0.0524 | 0.5882 | -0.0948 | 0.0863 | 0.3082 | 12.0773 | 0.1478 | 455.4781 |
| CardioEmbolicStroke | s_Eubacterium_cylindroides | Simple mode               | 9 | 0.1351  | 0.1045 | 0.2323 | -0.0948 | 0.0863 | 0.3082 | 12.0773 | 0.1478 | 455.4781 |
| CardioEmbolicStroke | s_Eubacterium_cylindroides | Weighted mode             | 9 | 0.1258  | 0.0889 | 0.1949 | -0.0948 | 0.0863 | 0.3082 | 12.0773 | 0.1478 | 455.4781 |
| CardioEmbolicStroke | s_Eubacterium_dolichum     | MR Egger                  | 9 | 0.1744  | 0.3115 | 0.5932 | -0.0438 | 0.0795 | 0.5984 | 4.8228  | 0.6816 | 838.9999 |
| CardioEmbolicStroke | s_Eubacterium_dolichum     | Weighted median           | 9 | 0.0308  | 0.0610 | 0.6140 | -0.0438 | 0.0795 | 0.5984 | 4.8228  | 0.6816 | 838.9999 |
| CardioEmbolicStroke | s_Eubacterium_dolichum     | Inverse variance weighted | 9 | 0.0046  | 0.0476 | 0.9239 | -0.0438 | 0.0795 | 0.5984 | 4.8228  | 0.6816 | 838.9999 |
| CardioEmbolicStroke | s_Eubacterium_dolichum     | Simple mode               | 9 | 0.0312  | 0.0882 | 0.7330 | -0.0438 | 0.0795 | 0.5984 | 4.8228  | 0.6816 | 838.9999 |
| CardioEmbolicStroke | s_Eubacterium_dolichum     | Weighted mode             | 9 | 0.0489  | 0.0806 | 0.5605 | -0.0438 | 0.0795 | 0.5984 | 4.8228  | 0.6816 | 838.9999 |
| CardioEmbolicStroke | s_Eubacterium_eligens      | MR Egger                  | 9 | 1.2708  | 0.6686 | 0.0991 | -0.2886 | 0.1706 | 0.1345 | 10.4388 | 0.2356 | 112.1479 |
| CardioEmbolicStroke | s_Eubacterium_eligens      | Weighted median           | 9 | -0.0055 | 0.1486 | 0.9705 | -0.2886 | 0.1706 | 0.1345 | 10.4388 | 0.2356 | 112.1479 |
| CardioEmbolicStroke | s_Eubacterium_eligens      | Inverse variance weighted | 9 | 0.1529  | 0.1135 | 0.1779 | -0.2886 | 0.1706 | 0.1345 | 10.4388 | 0.2356 | 112.1479 |
| CardioEmbolicStroke | s_Eubacterium_eligens      | Simple mode               | 9 | -0.0773 | 0.2470 | 0.7624 | -0.2886 | 0.1706 | 0.1345 | 10.4388 | 0.2356 | 112.1479 |
| CardioEmbolicStroke | s_Eubacterium_eligens      | Weighted mode             | 9 | -0.0711 | 0.2591 | 0.7906 | -0.2886 | 0.1706 | 0.1345 | 10.4388 | 0.2356 | 112.1479 |
| CardioEmbolicStroke | s_Eubacterium_hallii       | MR Egger                  | 9 | 0.5028  | 0.5203 | 0.3660 | -0.1404 | 0.1327 | 0.3254 | 15.0171 | 0.0588 | 284.5953 |
| CardioEmbolicStroke | s_Eubacterium_hallii       | Weighted median           | 9 | -0.0009 | 0.0800 | 0.9912 | -0.1404 | 0.1327 | 0.3254 | 15.0171 | 0.0588 | 284.5953 |
| CardioEmbolicStroke | s_Eubacterium_hallii       | Inverse variance weighted | 9 | -0.0410 | 0.0801 | 0.6091 | -0.1404 | 0.1327 | 0.3254 | 15.0171 | 0.0588 | 284.5953 |
| CardioEmbolicStroke | s_Eubacterium_hallii       | Simple mode               | 9 | 0.0328  | 0.1577 | 0.8402 | -0.1404 | 0.1327 | 0.3254 | 15.0171 | 0.0588 | 284.5953 |
| CardioEmbolicStroke | s_Eubacterium_hallii       | Weighted mode             | 9 | 0.0620  | 0.1193 | 0.6175 | -0.1404 | 0.1327 | 0.3254 | 15.0171 | 0.0588 | 284.5953 |
| CardioEmbolicStroke | s_Eubacterium_limosum      | MR Egger                  | 9 | 0.1904  | 0.3672 | 0.6201 | -0.0473 | 0.0937 | 0.6292 | 8.2304  | 0.3127 | 508.5204 |
| CardioEmbolicStroke | s_Eubacterium_limosum      | Weighted median           | 9 | 0.0128  | 0.0715 | 0.8575 | -0.0473 | 0.0937 | 0.6292 | 8.2304  | 0.3127 | 508.5204 |
| CardioEmbolicStroke | s_Eubacterium_limosum      | Inverse variance weighted | 9 | 0.0072  | 0.0534 | 0.8925 | -0.0473 | 0.0937 | 0.6292 | 8.2304  | 0.3127 | 508.5204 |
| CardioEmbolicStroke | s_Eubacterium_limosum      | Simple mode               | 9 | -0.0839 | 0.1211 | 0.5080 | -0.0473 | 0.0937 | 0.6292 | 8.2304  | 0.3127 | 508.5204 |
| CardioEmbolicStroke | s_Eubacterium_limosum      | Weighted mode             | 9 | -0.0223 | 0.1045 | 0.8361 | -0.0473 | 0.0937 | 0.6292 | 8.2304  | 0.3127 | 508.5204 |
| CardioEmbolicStroke | s_Eubacterium_rectale      | MR Egger                  | 9 | 0.3863  | 0.4457 | 0.4148 | -0.1133 | 0.1137 | 0.3521 | 7.0334  | 0.4254 | 334.0763 |
| CardioEmbolicStroke | s_Eubacterium_rectale      | Weighted median           | 9 | -0.0244 | 0.0967 | 0.8009 | -0.1133 | 0.1137 | 0.3521 | 7.0334  | 0.4254 | 334.0763 |
| CardioEmbolicStroke | s_Eubacterium_rectale      | Inverse variance weighted | 9 | -0.0528 | 0.0681 | 0.4381 | -0.1133 | 0.1137 | 0.3521 | 7.0334  | 0.4254 | 334.0763 |
| CardioEmbolicStroke | s_Eubacterium_rectale      | Simple mode               | 9 | -0.1736 | 0.1440 | 0.2625 | -0.1133 | 0.1137 | 0.3521 | 7.0334  | 0.4254 | 334.0763 |
| CardioEmbolicStroke | s_Eubacterium_rectale      | Weighted mode             | 9 | -0.0330 | 0.1435 | 0.8236 | -0.1133 | 0.1137 | 0.3521 | 7.0334  | 0.4254 | 334.0763 |
| CardioEmbolicStroke | s_Eubacterium_saburreum    | MR Egger                  | 9 | 0.2708  | 0.6625 | 0.6950 | -0.0671 | 0.1690 | 0.7032 | 15.3448 | 0.0318 | 204.3674 |
| CardioEmbolicStroke | s_Eubacterium_saburreum    | Weighted median           | 9 | 0.0251  | 0.0946 | 0.7912 | -0.0671 | 0.1690 | 0.7032 | 15.3448 | 0.0318 | 204.3674 |
| CardioEmbolicStroke | s_Eubacterium_saburreum    | Inverse variance weighted | 9 | 0.0108  | 0.0958 | 0.9099 | -0.0671 | 0.1690 | 0.7032 | 15.3448 | 0.0318 | 204.3674 |
| CardioEmbolicStroke | s_Eubacterium_saburreum    | Simple mode               | 9 | 0.0046  | 0.1311 | 0.9731 | -0.0671 | 0.1690 | 0.7032 | 15.3448 | 0.0318 | 204.3674 |
| CardioEmbolicStroke | s_Eubacterium_saburreum    | Weighted mode             | 9 | -0.0020 | 0.1270 | 0.9878 | -0.0671 | 0.1690 | 0.7032 | 15.3448 | 0.0318 | 204.3674 |
| CardioEmbolicStroke | s_Eubacterium_siraeum      | MR Egger                  | 9 | 0.2839  | 0.5332 | 0.6110 | -0.0794 | 0.1360 | 0.5778 | 4.2820  | 0.7468 | 415.2846 |
| CardioEmbolicStroke | s_Eubacterium_siraeum      | Weighted median           | 9 | -0.0762 | 0.1030 | 0.4595 | -0.0794 | 0.1360 | 0.5778 | 4.2820  | 0.7468 | 415.2846 |
| CardioEmbolicStroke | s_Eubacterium_siraeum      | Inverse variance weighted | 9 | -0.0236 | 0.0815 | 0.7718 | -0.0794 | 0.1360 | 0.5778 | 4.2820  | 0.7468 | 415.2846 |
| CardioEmbolicStroke | s_Eubacterium_siraeum      | Simple mode               | 9 | -0.1183 | 0.1719 | 0.5109 | -0.0794 | 0.1360 | 0.5778 | 4.2820  | 0.7468 | 415.2846 |
| CardioEmbolicStroke | s_Eubacterium_siraeum      | Weighted mode             | 9 | -0.1202 | 0.1768 | 0.5156 | -0.0794 | 0.1360 | 0.5778 | 4.2820  | 0.7468 | 415.2846 |

|                     |                                  |                           |   |         |        |        |         |        |        |         |        |          |
|---------------------|----------------------------------|---------------------------|---|---------|--------|--------|---------|--------|--------|---------|--------|----------|
| CardioEmbolicStroke | s_Eubacterium_ventriosum         | MR Egger                  | 9 | 0.3589  | 0.3735 | 0.3687 | -0.0947 | 0.0953 | 0.3534 | 6.5270  | 0.4797 | 487.6864 |
| CardioEmbolicStroke | s_Eubacterium_ventriosum         | Weighted median           | 9 | -0.0034 | 0.0758 | 0.9645 | -0.0947 | 0.0953 | 0.3534 | 6.5270  | 0.4797 | 487.6864 |
| CardioEmbolicStroke | s_Eubacterium_ventriosum         | Inverse variance weighted | 9 | -0.0080 | 0.0571 | 0.8886 | -0.0947 | 0.0953 | 0.3534 | 6.5270  | 0.4797 | 487.6864 |
| CardioEmbolicStroke | s_Eubacterium_ventriosum         | Simple mode               | 9 | -0.0299 | 0.1165 | 0.8039 | -0.0947 | 0.0953 | 0.3534 | 6.5270  | 0.4797 | 487.6864 |
| CardioEmbolicStroke | s_Eubacterium_ventriosum         | Weighted mode             | 9 | -0.0094 | 0.1097 | 0.9336 | -0.0947 | 0.0953 | 0.3534 | 6.5270  | 0.4797 | 487.6864 |
| CardioEmbolicStroke | s_Faecalibacterium_prausnitzii   | MR Egger                  | 9 | 0.9595  | 0.5069 | 0.1003 | -0.2389 | 0.1293 | 0.1072 | 14.4055 | 0.0718 | 238.2862 |
| CardioEmbolicStroke | s_Faecalibacterium_prausnitzii   | Weighted median           | 9 | 0.1164  | 0.0945 | 0.2180 | -0.2389 | 0.1293 | 0.1072 | 14.4055 | 0.0718 | 238.2862 |
| CardioEmbolicStroke | s_Faecalibacterium_prausnitzii   | Inverse variance weighted | 9 | 0.0341  | 0.0884 | 0.6996 | -0.2389 | 0.1293 | 0.1072 | 14.4055 | 0.0718 | 238.2862 |
| CardioEmbolicStroke | s_Faecalibacterium_prausnitzii   | Simple mode               | 9 | 0.1540  | 0.1613 | 0.3675 | -0.2389 | 0.1293 | 0.1072 | 14.4055 | 0.0718 | 238.2862 |
| CardioEmbolicStroke | s_Faecalibacterium_prausnitzii   | Weighted mode             | 9 | 0.1570  | 0.1240 | 0.2411 | -0.2389 | 0.1293 | 0.1072 | 14.4055 | 0.0718 | 238.2862 |
| CardioEmbolicStroke | s_Gemella_sanguinis              | MR Egger                  | 9 | 0.0744  | 0.5492 | 0.8960 | -0.0176 | 0.1401 | 0.9038 | 12.6925 | 0.0800 | 285.7568 |
| CardioEmbolicStroke | s_Gemella_sanguinis              | Weighted median           | 9 | 0.0404  | 0.0933 | 0.6647 | -0.0176 | 0.1401 | 0.9038 | 12.6925 | 0.0800 | 285.7568 |
| CardioEmbolicStroke | s_Gemella_sanguinis              | Inverse variance weighted | 9 | 0.0064  | 0.0786 | 0.9351 | -0.0176 | 0.1401 | 0.9038 | 12.6925 | 0.0800 | 285.7568 |
| CardioEmbolicStroke | s_Gemella_sanguinis              | Simple mode               | 9 | 0.0254  | 0.1768 | 0.8893 | -0.0176 | 0.1401 | 0.9038 | 12.6925 | 0.0800 | 285.7568 |
| CardioEmbolicStroke | s_Gemella_sanguinis              | Weighted mode             | 9 | 0.0974  | 0.1756 | 0.5941 | -0.0176 | 0.1401 | 0.9038 | 12.6925 | 0.0800 | 285.7568 |
| CardioEmbolicStroke | s_Granulicatella_adiacens        | MR Egger                  | 9 | 0.2998  | 0.3277 | 0.3908 | -0.0857 | 0.0836 | 0.3396 | 8.2838  | 0.4063 | 584.5425 |
| CardioEmbolicStroke | s_Granulicatella_adiacens        | Weighted median           | 9 | -0.0271 | 0.0680 | 0.6907 | -0.0857 | 0.0836 | 0.3396 | 8.2838  | 0.4063 | 584.5425 |
| CardioEmbolicStroke | s_Granulicatella_adiacens        | Inverse variance weighted | 9 | -0.0321 | 0.0502 | 0.5223 | -0.0857 | 0.0836 | 0.3396 | 8.2838  | 0.4063 | 584.5425 |
| CardioEmbolicStroke | s_Granulicatella_adiacens        | Simple mode               | 9 | -0.0227 | 0.1083 | 0.8393 | -0.0857 | 0.0836 | 0.3396 | 8.2838  | 0.4063 | 584.5425 |
| CardioEmbolicStroke | s_Granulicatella_adiacens        | Weighted mode             | 9 | -0.0261 | 0.0999 | 0.8007 | -0.0857 | 0.0836 | 0.3396 | 8.2838  | 0.4063 | 584.5425 |
| CardioEmbolicStroke | s_Haemophilus_influenzae         | MR Egger                  | 9 | 1.3711  | 0.6823 | 0.0844 | -0.3351 | 0.1741 | 0.0956 | 9.3468  | 0.3139 | 105.2750 |
| CardioEmbolicStroke | s_Haemophilus_influenzae         | Weighted median           | 9 | -0.0286 | 0.1539 | 0.8526 | -0.3351 | 0.1741 | 0.0956 | 9.3468  | 0.3139 | 105.2750 |
| CardioEmbolicStroke | s_Haemophilus_influenzae         | Inverse variance weighted | 9 | 0.0731  | 0.1127 | 0.5166 | -0.3351 | 0.1741 | 0.0956 | 9.3468  | 0.3139 | 105.2750 |
| CardioEmbolicStroke | s_Haemophilus_influenzae         | Simple mode               | 9 | -0.1701 | 0.2556 | 0.5244 | -0.3351 | 0.1741 | 0.0956 | 9.3468  | 0.3139 | 105.2750 |
| CardioEmbolicStroke | s_Haemophilus_influenzae         | Weighted mode             | 9 | -0.1663 | 0.2690 | 0.5536 | -0.3351 | 0.1741 | 0.0956 | 9.3468  | 0.3139 | 105.2750 |
| CardioEmbolicStroke | s_Haemophilus_pittmaniae         | MR Egger                  | 9 | 1.3221  | 0.6868 | 0.0956 | -0.3397 | 0.1752 | 0.0937 | 9.3983  | 0.3098 | 119.9468 |
| CardioEmbolicStroke | s_Haemophilus_pittmaniae         | Weighted median           | 9 | -0.0832 | 0.1415 | 0.5566 | -0.3397 | 0.1752 | 0.0937 | 9.3983  | 0.3098 | 119.9468 |
| CardioEmbolicStroke | s_Haemophilus_pittmaniae         | Inverse variance weighted | 9 | 0.0064  | 0.1138 | 0.9554 | -0.3397 | 0.1752 | 0.0937 | 9.3983  | 0.3098 | 119.9468 |
| CardioEmbolicStroke | s_Haemophilus_pittmaniae         | Simple mode               | 9 | -0.1710 | 0.2529 | 0.5180 | -0.3397 | 0.1752 | 0.0937 | 9.3983  | 0.3098 | 119.9468 |
| CardioEmbolicStroke | s_Haemophilus_pittmaniae         | Weighted mode             | 9 | -0.1577 | 0.2327 | 0.5171 | -0.3397 | 0.1752 | 0.0937 | 9.3983  | 0.3098 | 119.9468 |
| CardioEmbolicStroke | s_Holdemania_filiformis          | MR Egger                  | 9 | -0.0264 | 0.3871 | 0.9475 | -0.0053 | 0.0988 | 0.9584 | 8.7692  | 0.2697 | 436.6435 |
| CardioEmbolicStroke | s_Holdemania_filiformis          | Weighted median           | 9 | -0.0485 | 0.0719 | 0.4997 | -0.0053 | 0.0988 | 0.9584 | 8.7692  | 0.2697 | 436.6435 |
| CardioEmbolicStroke | s_Holdemania_filiformis          | Inverse variance weighted | 9 | -0.0471 | 0.0554 | 0.3949 | -0.0053 | 0.0988 | 0.9584 | 8.7692  | 0.2697 | 436.6435 |
| CardioEmbolicStroke | s_Holdemania_filiformis          | Simple mode               | 9 | -0.1569 | 0.1294 | 0.2597 | -0.0053 | 0.0988 | 0.9584 | 8.7692  | 0.2697 | 436.6435 |
| CardioEmbolicStroke | s_Holdemania_filiformis          | Weighted mode             | 9 | -0.1669 | 0.1220 | 0.2085 | -0.0053 | 0.0988 | 0.9584 | 8.7692  | 0.2697 | 436.6435 |
| CardioEmbolicStroke | s_Klebsiella_oxytoca             | MR Egger                  | 9 | -0.2944 | 0.6964 | 0.6852 | 0.0208  | 0.1777 | 0.9103 | 5.5029  | 0.5988 | 100.7251 |
| CardioEmbolicStroke | s_Klebsiella_oxytoca             | Weighted median           | 9 | -0.1985 | 0.1406 | 0.1580 | 0.0208  | 0.1777 | 0.9103 | 5.5029  | 0.5988 | 100.7251 |
| CardioEmbolicStroke | s_Klebsiella_oxytoca             | Inverse variance weighted | 9 | -0.2140 | 0.1064 | 0.0444 | 0.0208  | 0.1777 | 0.9103 | 5.5029  | 0.5988 | 100.7251 |
| CardioEmbolicStroke | s_Klebsiella_oxytoca             | Simple mode               | 9 | -0.1485 | 0.2169 | 0.5130 | 0.0208  | 0.1777 | 0.9103 | 5.5029  | 0.5988 | 100.7251 |
| CardioEmbolicStroke | s_Klebsiella_oxytoca             | Weighted mode             | 9 | -0.1417 | 0.2113 | 0.5215 | 0.0208  | 0.1777 | 0.9103 | 5.5029  | 0.5988 | 100.7251 |
| CardioEmbolicStroke | s_Lachnospiraceae_oral_taxon_107 | MR Egger                  | 9 | 0.1877  | 0.4016 | 0.6545 | -0.0659 | 0.1025 | 0.5405 | 12.4811 | 0.0858 | 376.3664 |
| CardioEmbolicStroke | s_Lachnospiraceae_oral_taxon_107 | Weighted median           | 9 | -0.1268 | 0.0653 | 0.0522 | -0.0659 | 0.1025 | 0.5405 | 12.4811 | 0.0858 | 376.3664 |
| CardioEmbolicStroke | s_Lachnospiraceae_oral_taxon_107 | Inverse variance weighted | 9 | -0.0677 | 0.0591 | 0.2519 | -0.0659 | 0.1025 | 0.5405 | 12.4811 | 0.0858 | 376.3664 |
| CardioEmbolicStroke | s_Lachnospiraceae_oral_taxon_107 | Simple mode               | 9 | -0.1824 | 0.1037 | 0.1168 | -0.0659 | 0.1025 | 0.5405 | 12.4811 | 0.0858 | 376.3664 |
| CardioEmbolicStroke | s_Lachnospiraceae_oral_taxon_107 | Weighted mode             | 9 | -0.1682 | 0.1163 | 0.1861 | -0.0659 | 0.1025 | 0.5405 | 12.4811 | 0.0858 | 376.3664 |
| CardioEmbolicStroke | s_Lactobacillus_ruminis          | MR Egger                  | 9 | 0.0820  | 0.3706 | 0.8312 | -0.0350 | 0.0945 | 0.7221 | 2.3416  | 0.9385 | 915.8044 |
| CardioEmbolicStroke | s_Lactobacillus_ruminis          | Weighted median           | 9 | -0.0303 | 0.0711 | 0.6700 | -0.0350 | 0.0945 | 0.7221 | 2.3416  | 0.9385 | 915.8044 |
| CardioEmbolicStroke | s_Lactobacillus_ruminis          | Inverse variance weighted | 9 | -0.0536 | 0.0566 | 0.3439 | -0.0350 | 0.0945 | 0.7221 | 2.3416  | 0.9385 | 915.8044 |
| CardioEmbolicStroke | s_Lactobacillus_ruminis          | Simple mode               | 9 | -0.0315 | 0.1043 | 0.7706 | -0.0350 | 0.0945 | 0.7221 | 2.3416  | 0.9385 | 915.8044 |
| CardioEmbolicStroke | s_Lactobacillus_ruminis          | Weighted mode             | 9 | -0.0339 | 0.0983 | 0.7389 | -0.0350 | 0.0945 | 0.7221 | 2.3416  | 0.9385 | 915.8044 |
| CardioEmbolicStroke | s_Marvinbryantia_formatexigens   | MR Egger                  | 9 | 0.6658  | 0.4341 | 0.1690 | -0.1550 | 0.1108 | 0.2045 | 12.2208 | 0.1416 | 256.0570 |
| CardioEmbolicStroke | s_Marvinbryantia_formatexigens   | Weighted median           | 9 | 0.1060  | 0.0791 | 0.1798 | -0.1550 | 0.1108 | 0.2045 | 12.2208 | 0.1416 | 256.0570 |
| CardioEmbolicStroke | s_Marvinbryantia_formatexigens   | Inverse variance weighted | 9 | 0.0655  | 0.0702 | 0.3507 | -0.1550 | 0.1108 | 0.2045 | 12.2208 | 0.1416 | 256.0570 |
| CardioEmbolicStroke | s_Marvinbryantia_formatexigens   | Simple mode               | 9 | 0.0776  | 0.1385 | 0.5905 | -0.1550 | 0.1108 | 0.2045 | 12.2208 | 0.1416 | 256.0570 |
| CardioEmbolicStroke | s_Marvinbryantia_formatexigens   | Weighted mode             | 9 | 0.0805  | 0.1112 | 0.4900 | -0.1550 | 0.1108 | 0.2045 | 12.2208 | 0.1416 | 256.0570 |
| CardioEmbolicStroke | s_Megasphaera_elsdenii           | MR Egger                  | 9 | -2.1046 | 0.9240 | 0.0568 | 0.4946  | 0.2358 | 0.0741 | 14.6072 | 0.0672 | 37.3441  |
| CardioEmbolicStroke | s_Megasphaera_elsdenii           | Weighted median           | 9 | -0.2656 | 0.1856 | 0.1525 | 0.4946  | 0.2358 | 0.0741 | 14.6072 | 0.0672 | 37.3441  |
| CardioEmbolicStroke | s_Megasphaera_elsdenii           | Inverse variance weighted | 9 | -0.1886 | 0.1686 | 0.2632 | 0.4946  | 0.2358 | 0.0741 | 14.6072 | 0.0672 | 37.3441  |
| CardioEmbolicStroke | s_Megasphaera_elsdenii           | Simple mode               | 9 | -0.4766 | 0.3365 | 0.1944 | 0.4946  | 0.2358 | 0.0741 | 14.6072 | 0.0672 | 37.3441  |
| CardioEmbolicStroke | s_Megasphaera_elsdenii           | Weighted mode             | 9 | -0.3891 | 0.3126 | 0.2484 | 0.4946  | 0.2358 | 0.0741 | 14.6072 | 0.0672 | 37.3441  |
| CardioEmbolicStroke | s_Megasphaera_genomosp._type_1   | MR Egger                  | 9 | -0.5014 | 0.8259 | 0.5630 | 0.1086  | 0.2106 | 0.6221 | 10.4588 | 0.1640 | 136.9776 |

|                     |                                       |                           |   |         |        |        |         |        |        |         |        |          |
|---------------------|---------------------------------------|---------------------------|---|---------|--------|--------|---------|--------|--------|---------|--------|----------|
| CardioEmbolicStroke | s_Megasphaera_genomosp._type_1        | Weighted median           | 9 | 0.0526  | 0.1346 | 0.6959 | 0.1086  | 0.2106 | 0.6221 | 10.4588 | 0.1640 | 136.9776 |
| CardioEmbolicStroke | s_Megasphaera_genomosp._type_1        | Inverse variance weighted | 9 | -0.0806 | 0.1203 | 0.5027 | 0.1086  | 0.2106 | 0.6221 | 10.4588 | 0.1640 | 136.9776 |
| CardioEmbolicStroke | s_Megasphaera_genomosp._type_1        | Simple mode               | 9 | 0.0770  | 0.1939 | 0.7017 | 0.1086  | 0.2106 | 0.6221 | 10.4588 | 0.1640 | 136.9776 |
| CardioEmbolicStroke | s_Megasphaera_genomosp._type_1        | Weighted mode             | 9 | 0.0613  | 0.1925 | 0.7582 | 0.1086  | 0.2106 | 0.6221 | 10.4588 | 0.1640 | 136.9776 |
| CardioEmbolicStroke | s_Megasphaera_micronuciformis         | MR Egger                  | 9 | 0.1037  | 0.4388 | 0.8200 | 0.0061  | 0.1120 | 0.9584 | 3.5722  | 0.8275 | 385.8937 |
| CardioEmbolicStroke | s_Megasphaera_micronuciformis         | Weighted median           | 9 | 0.1392  | 0.0847 | 0.1004 | 0.0061  | 0.1120 | 0.9584 | 3.5722  | 0.8275 | 385.8937 |
| CardioEmbolicStroke | s_Megasphaera_micronuciformis         | Inverse variance weighted | 9 | 0.1271  | 0.0671 | 0.0580 | 0.0061  | 0.1120 | 0.9584 | 3.5722  | 0.8275 | 385.8937 |
| CardioEmbolicStroke | s_Megasphaera_micronuciformis         | Simple mode               | 9 | 0.1186  | 0.1351 | 0.4056 | 0.0061  | 0.1120 | 0.9584 | 3.5722  | 0.8275 | 385.8937 |
| CardioEmbolicStroke | s_Megasphaera_micronuciformis         | Weighted mode             | 9 | 0.1114  | 0.1186 | 0.3751 | 0.0061  | 0.1120 | 0.9584 | 3.5722  | 0.8275 | 385.8937 |
| CardioEmbolicStroke | s_Mitsuokella_multacida               | MR Egger                  | 9 | -0.0658 | 0.6361 | 0.9205 | -0.0151 | 0.1623 | 0.9284 | 4.3981  | 0.7330 | 216.9363 |
| CardioEmbolicStroke | s_Mitsuokella_multacida               | Weighted median           | 9 | -0.1326 | 0.1274 | 0.2980 | -0.0151 | 0.1623 | 0.9284 | 4.3981  | 0.7330 | 216.9363 |
| CardioEmbolicStroke | s_Mitsuokella_multacida               | Inverse variance weighted | 9 | -0.1244 | 0.0972 | 0.2008 | -0.0151 | 0.1623 | 0.9284 | 4.3981  | 0.7330 | 216.9363 |
| CardioEmbolicStroke | s_Mitsuokella_multacida               | Simple mode               | 9 | -0.2806 | 0.2111 | 0.2206 | -0.0151 | 0.1623 | 0.9284 | 4.3981  | 0.7330 | 216.9363 |
| CardioEmbolicStroke | s_Mitsuokella_multacida               | Weighted mode             | 9 | -0.2779 | 0.2016 | 0.2054 | -0.0151 | 0.1623 | 0.9284 | 4.3981  | 0.7330 | 216.9363 |
| CardioEmbolicStroke | s_Mobiluncus_curtisii                 | MR Egger                  | 9 | 0.5683  | 0.4837 | 0.2784 | -0.1354 | 0.1234 | 0.3087 | 6.0950  | 0.6366 | 390.8285 |
| CardioEmbolicStroke | s_Mobiluncus_curtisii                 | Weighted median           | 9 | 0.0327  | 0.0985 | 0.7403 | -0.1354 | 0.1234 | 0.3087 | 6.0950  | 0.6366 | 390.8285 |
| CardioEmbolicStroke | s_Mobiluncus_curtisii                 | Inverse variance weighted | 9 | 0.0436  | 0.0739 | 0.5554 | -0.1354 | 0.1234 | 0.3087 | 6.0950  | 0.6366 | 390.8285 |
| CardioEmbolicStroke | s_Mobiluncus_curtisii                 | Simple mode               | 9 | 0.0567  | 0.1684 | 0.7449 | -0.1354 | 0.1234 | 0.3087 | 6.0950  | 0.6366 | 390.8285 |
| CardioEmbolicStroke | s_Mobiluncus_curtisii                 | Weighted mode             | 9 | 0.0780  | 0.1417 | 0.5973 | -0.1354 | 0.1234 | 0.3087 | 6.0950  | 0.6366 | 390.8285 |
| CardioEmbolicStroke | s_Oribacterium_sinus                  | MR Egger                  | 9 | 0.4516  | 0.2614 | 0.1277 | -0.1091 | 0.0667 | 0.1458 | 4.2969  | 0.8294 | 830.7070 |
| CardioEmbolicStroke | s_Oribacterium_sinus                  | Weighted median           | 9 | 0.0324  | 0.0505 | 0.5215 | -0.1091 | 0.0667 | 0.1458 | 4.2969  | 0.8294 | 830.7070 |
| CardioEmbolicStroke | s_Oribacterium_sinus                  | Inverse variance weighted | 9 | 0.0290  | 0.0400 | 0.4683 | -0.1091 | 0.0667 | 0.1458 | 4.2969  | 0.8294 | 830.7070 |
| CardioEmbolicStroke | s_Oribacterium_sinus                  | Simple mode               | 9 | 0.0209  | 0.0818 | 0.8051 | -0.1091 | 0.0667 | 0.1458 | 4.2969  | 0.8294 | 830.7070 |
| CardioEmbolicStroke | s_Oribacterium_sinus                  | Weighted mode             | 9 | 0.0403  | 0.0779 | 0.6189 | -0.1091 | 0.0667 | 0.1458 | 4.2969  | 0.8294 | 830.7070 |
| CardioEmbolicStroke | s_Parabacteroides_distasonis          | MR Egger                  | 9 | 0.3967  | 0.3519 | 0.2968 | -0.0966 | 0.0898 | 0.3177 | 11.6710 | 0.1665 | 371.7893 |
| CardioEmbolicStroke | s_Parabacteroides_distasonis          | Weighted median           | 9 | 0.0258  | 0.0671 | 0.7003 | -0.0966 | 0.0898 | 0.3177 | 11.6710 | 0.1665 | 371.7893 |
| CardioEmbolicStroke | s_Parabacteroides_distasonis          | Inverse variance weighted | 9 | 0.0226  | 0.0543 | 0.6770 | -0.0966 | 0.0898 | 0.3177 | 11.6710 | 0.1665 | 371.7893 |
| CardioEmbolicStroke | s_Parabacteroides_distasonis          | Simple mode               | 9 | 0.0847  | 0.1100 | 0.4634 | -0.0966 | 0.0898 | 0.3177 | 11.6710 | 0.1665 | 371.7893 |
| CardioEmbolicStroke | s_Parabacteroides_distasonis          | Weighted mode             | 9 | 0.0433  | 0.0984 | 0.6718 | -0.0966 | 0.0898 | 0.3177 | 11.6710 | 0.1665 | 371.7893 |
| CardioEmbolicStroke | s_Parabacteroides_merdae              | MR Egger                  | 9 | 0.5843  | 0.6662 | 0.4095 | -0.1723 | 0.1699 | 0.3444 | 13.4837 | 0.0963 | 168.5984 |
| CardioEmbolicStroke | s_Parabacteroides_merdae              | Weighted median           | 9 | -0.0239 | 0.1140 | 0.8337 | -0.1723 | 0.1699 | 0.3444 | 13.4837 | 0.0963 | 168.5984 |
| CardioEmbolicStroke | s_Parabacteroides_merdae              | Inverse variance weighted | 9 | -0.0832 | 0.1020 | 0.4146 | -0.1723 | 0.1699 | 0.3444 | 13.4837 | 0.0963 | 168.5984 |
| CardioEmbolicStroke | s_Parabacteroides_merdae              | Simple mode               | 9 | 0.0392  | 0.1990 | 0.8486 | -0.1723 | 0.1699 | 0.3444 | 13.4837 | 0.0963 | 168.5984 |
| CardioEmbolicStroke | s_Parabacteroides_merdae              | Weighted mode             | 9 | 0.0703  | 0.1613 | 0.6745 | -0.1723 | 0.1699 | 0.3444 | 13.4837 | 0.0963 | 168.5984 |
| CardioEmbolicStroke | s_Parasutterella_excrementihominis    | MR Egger                  | 9 | 0.9391  | 0.8739 | 0.3182 | -0.2282 | 0.2229 | 0.3400 | 7.0715  | 0.5289 | 115.5145 |
| CardioEmbolicStroke | s_Parasutterella_excrementihominis    | Weighted median           | 9 | 0.1677  | 0.1741 | 0.3356 | -0.2282 | 0.2229 | 0.3400 | 7.0715  | 0.5289 | 115.5145 |
| CardioEmbolicStroke | s_Parasutterella_excrementihominis    | Inverse variance weighted | 9 | 0.0550  | 0.1336 | 0.6806 | -0.2282 | 0.2229 | 0.3400 | 7.0715  | 0.5289 | 115.5145 |
| CardioEmbolicStroke | s_Parasutterella_excrementihominis    | Simple mode               | 9 | 0.1884  | 0.2754 | 0.5133 | -0.2282 | 0.2229 | 0.3400 | 7.0715  | 0.5289 | 115.5145 |
| CardioEmbolicStroke | s_Parasutterella_excrementihominis    | Weighted mode             | 9 | 0.1884  | 0.2344 | 0.4447 | -0.2282 | 0.2229 | 0.3400 | 7.0715  | 0.5289 | 115.5145 |
| CardioEmbolicStroke | s_Peptoniphilus_lacrimalis            | MR Egger                  | 9 | -0.5235 | 0.9406 | 0.5951 | 0.1545  | 0.2399 | 0.5402 | 13.5635 | 0.0595 | 77.8091  |
| CardioEmbolicStroke | s_Peptoniphilus_lacrimalis            | Weighted median           | 9 | -0.0259 | 0.1404 | 0.8534 | 0.1545  | 0.2399 | 0.5402 | 13.5635 | 0.0595 | 77.8091  |
| CardioEmbolicStroke | s_Peptoniphilus_lacrimalis            | Inverse variance weighted | 9 | 0.0750  | 0.1384 | 0.5879 | 0.1545  | 0.2399 | 0.5402 | 13.5635 | 0.0595 | 77.8091  |
| CardioEmbolicStroke | s_Peptoniphilus_lacrimalis            | Simple mode               | 9 | -0.2414 | 0.2809 | 0.4151 | 0.1545  | 0.2399 | 0.5402 | 13.5635 | 0.0595 | 77.8091  |
| CardioEmbolicStroke | s_Peptoniphilus_lacrimalis            | Weighted mode             | 9 | -0.2465 | 0.2207 | 0.2965 | 0.1545  | 0.2399 | 0.5402 | 13.5635 | 0.0595 | 77.8091  |
| CardioEmbolicStroke | s_Peptostreptococcus_anaerobius       | MR Egger                  | 9 | -0.1098 | 0.4812 | 0.8260 | 0.0546  | 0.1228 | 0.6700 | 5.1162  | 0.6458 | 345.0910 |
| CardioEmbolicStroke | s_Peptostreptococcus_anaerobius       | Weighted median           | 9 | 0.1028  | 0.0972 | 0.2905 | 0.0546  | 0.1228 | 0.6700 | 5.1162  | 0.6458 | 345.0910 |
| CardioEmbolicStroke | s_Peptostreptococcus_anaerobius       | Inverse variance weighted | 9 | 0.1017  | 0.0735 | 0.1668 | 0.0546  | 0.1228 | 0.6700 | 5.1162  | 0.6458 | 345.0910 |
| CardioEmbolicStroke | s_Peptostreptococcus_anaerobius       | Simple mode               | 9 | 0.1572  | 0.1578 | 0.3485 | 0.0546  | 0.1228 | 0.6700 | 5.1162  | 0.6458 | 345.0910 |
| CardioEmbolicStroke | s_Peptostreptococcus_anaerobius       | Weighted mode             | 9 | 0.1249  | 0.1480 | 0.4231 | 0.0546  | 0.1228 | 0.6700 | 5.1162  | 0.6458 | 345.0910 |
| CardioEmbolicStroke | s_Peptostreptococcus_stomatis         | MR Egger                  | 9 | -0.7676 | 0.7277 | 0.3266 | 0.2214  | 0.1856 | 0.2720 | 11.3019 | 0.1852 | 137.9550 |
| CardioEmbolicStroke | s_Peptostreptococcus_stomatis         | Weighted median           | 9 | 0.1387  | 0.1332 | 0.2978 | 0.2214  | 0.1856 | 0.2720 | 11.3019 | 0.1852 | 137.9550 |
| CardioEmbolicStroke | s_Peptostreptococcus_stomatis         | Inverse variance weighted | 9 | 0.0900  | 0.1141 | 0.4303 | 0.2214  | 0.1856 | 0.2720 | 11.3019 | 0.1852 | 137.9550 |
| CardioEmbolicStroke | s_Peptostreptococcus_stomatis         | Simple mode               | 9 | 0.3777  | 0.2737 | 0.2050 | 0.2214  | 0.1856 | 0.2720 | 11.3019 | 0.1852 | 137.9550 |
| CardioEmbolicStroke | s_Peptostreptococcus_stomatis         | Weighted mode             | 9 | 0.3488  | 0.2503 | 0.2010 | 0.2214  | 0.1856 | 0.2720 | 11.3019 | 0.1852 | 137.9550 |
| CardioEmbolicStroke | s_Phascolartcobacterium_succinatutens | MR Egger                  | 9 | -0.2262 | 0.5858 | 0.7109 | 0.0577  | 0.1495 | 0.7108 | 4.6286  | 0.7052 | 311.2645 |
| CardioEmbolicStroke | s_Phascolartcobacterium_succinatutens | Weighted median           | 9 | 0.0194  | 0.1206 | 0.8724 | 0.0577  | 0.1495 | 0.7108 | 4.6286  | 0.7052 | 311.2645 |
| CardioEmbolicStroke | s_Phascolartcobacterium_succinatutens | Inverse variance weighted | 9 | -0.0026 | 0.0895 | 0.9767 | 0.0577  | 0.1495 | 0.7108 | 4.6286  | 0.7052 | 311.2645 |
| CardioEmbolicStroke | s_Phascolartcobacterium_succinatutens | Simple mode               | 9 | 0.0311  | 0.1860 | 0.8713 | 0.0577  | 0.1495 | 0.7108 | 4.6286  | 0.7052 | 311.2645 |
| CardioEmbolicStroke | s_Phascolartcobacterium_succinatutens | Weighted mode             | 9 | 0.0243  | 0.1698 | 0.8896 | 0.0577  | 0.1495 | 0.7108 | 4.6286  | 0.7052 | 311.2645 |
| CardioEmbolicStroke | s_Porphyromonas_asaccharolytica       | MR Egger                  | 9 | -0.0431 | 0.8594 | 0.9614 | 0.0076  | 0.2193 | 0.9735 | 19.7523 | 0.0061 | 86.5923  |
| CardioEmbolicStroke | s_Porphyromonas_asaccharolytica       | Weighted median           | 9 | -0.0175 | 0.1177 | 0.8821 | 0.0076  | 0.2193 | 0.9735 | 19.7523 | 0.0061 | 86.5923  |

|                     |                                   |                           |   |         |        |        |         |        |        |         |        |          |
|---------------------|-----------------------------------|---------------------------|---|---------|--------|--------|---------|--------|--------|---------|--------|----------|
| CardioEmbolicStroke | s_Porphyromonas_asaccharolytica   | Inverse variance weighted | 9 | -0.0138 | 0.1229 | 0.9107 | 0.0076  | 0.2193 | 0.9735 | 19.7523 | 0.0061 | 86.5923  |
| CardioEmbolicStroke | s_Porphyromonas_asaccharolytica   | Simple mode               | 9 | 0.1288  | 0.2138 | 0.5635 | 0.0076  | 0.2193 | 0.9735 | 19.7523 | 0.0061 | 86.5923  |
| CardioEmbolicStroke | s_Porphyromonas_asaccharolytica   | Weighted mode             | 9 | -0.0625 | 0.1871 | 0.7471 | 0.0076  | 0.2193 | 0.9735 | 19.7523 | 0.0061 | 86.5923  |
| CardioEmbolicStroke | s_Prevotella_bergensis            | MR Egger                  | 9 | -0.7660 | 0.9581 | 0.4503 | 0.1747  | 0.2444 | 0.4978 | 6.4748  | 0.4855 | 97.5467  |
| CardioEmbolicStroke | s_Prevotella_bergensis            | Weighted median           | 9 | 0.0448  | 0.2007 | 0.8231 | 0.1747  | 0.2444 | 0.4978 | 6.4748  | 0.4855 | 97.5467  |
| CardioEmbolicStroke | s_Prevotella_bergensis            | Inverse variance weighted | 9 | -0.0891 | 0.1464 | 0.5427 | 0.1747  | 0.2444 | 0.4978 | 6.4748  | 0.4855 | 97.5467  |
| CardioEmbolicStroke | s_Prevotella_bergensis            | Simple mode               | 9 | 0.1702  | 0.3300 | 0.6198 | 0.1747  | 0.2444 | 0.4978 | 6.4748  | 0.4855 | 97.5467  |
| CardioEmbolicStroke | s_Prevotella_bergensis            | Weighted mode             | 9 | 0.1303  | 0.3255 | 0.6994 | 0.1747  | 0.2444 | 0.4978 | 6.4748  | 0.4855 | 97.5467  |
| CardioEmbolicStroke | s_Prevotella_bivia                | MR Egger                  | 9 | -1.0009 | 0.8349 | 0.2696 | 0.2000  | 0.2130 | 0.3791 | 9.5979  | 0.2125 | 56.5129  |
| CardioEmbolicStroke | s_Prevotella_bivia                | Weighted median           | 9 | -0.2369 | 0.1590 | 0.1363 | 0.2000  | 0.2130 | 0.3791 | 9.5979  | 0.2125 | 56.5129  |
| CardioEmbolicStroke | s_Prevotella_bivia                | Inverse variance weighted | 9 | -0.2263 | 0.1267 | 0.0740 | 0.2000  | 0.2130 | 0.3791 | 9.5979  | 0.2125 | 56.5129  |
| CardioEmbolicStroke | s_Prevotella_bivia                | Simple mode               | 9 | -0.4481 | 0.2719 | 0.1379 | 0.2000  | 0.2130 | 0.3791 | 9.5979  | 0.2125 | 56.5129  |
| CardioEmbolicStroke | s_Prevotella_bivia                | Weighted mode             | 9 | -0.1393 | 0.2613 | 0.6084 | 0.2000  | 0.2130 | 0.3791 | 9.5979  | 0.2125 | 56.5129  |
| CardioEmbolicStroke | s_Prevotella_buccae               | MR Egger                  | 9 | -0.4237 | 0.6637 | 0.5435 | 0.0826  | 0.1693 | 0.6407 | 2.9438  | 0.8901 | 229.6726 |
| CardioEmbolicStroke | s_Prevotella_buccae               | Weighted median           | 9 | -0.1048 | 0.1261 | 0.4059 | 0.0826  | 0.1693 | 0.6407 | 2.9438  | 0.8901 | 229.6726 |
| CardioEmbolicStroke | s_Prevotella_buccae               | Inverse variance weighted | 9 | -0.1038 | 0.1014 | 0.3062 | 0.0826  | 0.1693 | 0.6407 | 2.9438  | 0.8901 | 229.6726 |
| CardioEmbolicStroke | s_Prevotella_buccae               | Simple mode               | 9 | -0.1138 | 0.1981 | 0.5814 | 0.0826  | 0.1693 | 0.6407 | 2.9438  | 0.8901 | 229.6726 |
| CardioEmbolicStroke | s_Prevotella_buccae               | Weighted mode             | 9 | -0.1181 | 0.1851 | 0.5413 | 0.0826  | 0.1693 | 0.6407 | 2.9438  | 0.8901 | 229.6726 |
| CardioEmbolicStroke | s_Prevotella_buccalis             | MR Egger                  | 9 | -0.7509 | 0.5469 | 0.2122 | 0.1637  | 0.1395 | 0.2791 | 4.7234  | 0.7867 | 260.1675 |
| CardioEmbolicStroke | s_Prevotella_buccalis             | Weighted median           | 9 | -0.1659 | 0.1073 | 0.1221 | 0.1637  | 0.1395 | 0.2791 | 4.7234  | 0.7867 | 260.1675 |
| CardioEmbolicStroke | s_Prevotella_buccalis             | Inverse variance weighted | 9 | -0.1168 | 0.0836 | 0.1625 | 0.1637  | 0.1395 | 0.2791 | 4.7234  | 0.7867 | 260.1675 |
| CardioEmbolicStroke | s_Prevotella_buccalis             | Simple mode               | 9 | -0.1865 | 0.1453 | 0.2352 | 0.1637  | 0.1395 | 0.2791 | 4.7234  | 0.7867 | 260.1675 |
| CardioEmbolicStroke | s_Prevotella_buccalis             | Weighted mode             | 9 | -0.1388 | 0.1432 | 0.2237 | 0.1637  | 0.1395 | 0.2791 | 4.7234  | 0.7867 | 260.1675 |
| CardioEmbolicStroke | s_Prevotella_copri                | MR Egger                  | 9 | -0.4099 | 1.2380 | 0.7503 | 0.0212  | 0.3158 | 0.9483 | 8.1690  | 0.3179 | 17.9472  |
| CardioEmbolicStroke | s_Prevotella_copri                | Weighted median           | 9 | -0.2214 | 0.2305 | 0.3369 | 0.0212  | 0.3158 | 0.9483 | 8.1690  | 0.3179 | 17.9472  |
| CardioEmbolicStroke | s_Prevotella_copri                | Inverse variance weighted | 9 | -0.3276 | 0.1771 | 0.0643 | 0.0212  | 0.3158 | 0.9483 | 8.1690  | 0.3179 | 17.9472  |
| CardioEmbolicStroke | s_Prevotella_copri                | Simple mode               | 9 | -0.2099 | 0.3706 | 0.5866 | 0.0212  | 0.3158 | 0.9483 | 8.1690  | 0.3179 | 17.9472  |
| CardioEmbolicStroke | s_Prevotella_copri                | Weighted mode             | 9 | -0.1699 | 0.3074 | 0.5956 | 0.0212  | 0.3158 | 0.9483 | 8.1690  | 0.3179 | 17.9472  |
| CardioEmbolicStroke | s_Prevotella_denticola            | MR Egger                  | 9 | -0.1707 | 1.1157 | 0.8827 | 0.0222  | 0.2846 | 0.9400 | 8.1739  | 0.3175 | 68.9146  |
| CardioEmbolicStroke | s_Prevotella_denticola            | Weighted median           | 9 | -0.1338 | 0.2081 | 0.5202 | 0.0222  | 0.2846 | 0.9400 | 8.1739  | 0.3175 | 68.9146  |
| CardioEmbolicStroke | s_Prevotella_denticola            | Inverse variance weighted | 9 | -0.0848 | 0.1596 | 0.5952 | 0.0222  | 0.2846 | 0.9400 | 8.1739  | 0.3175 | 68.9146  |
| CardioEmbolicStroke | s_Prevotella_denticola            | Simple mode               | 9 | -0.2468 | 0.3196 | 0.4622 | 0.0222  | 0.2846 | 0.9400 | 8.1739  | 0.3175 | 68.9146  |
| CardioEmbolicStroke | s_Prevotella_denticola            | Weighted mode             | 9 | -0.1941 | 0.3172 | 0.5576 | 0.0222  | 0.2846 | 0.9400 | 8.1739  | 0.3175 | 68.9146  |
| CardioEmbolicStroke | s_Prevotella_disiens              | MR Egger                  | 9 | 0.3314  | 0.4620 | 0.4964 | -0.0664 | 0.1179 | 0.5908 | 11.9475 | 0.1023 | 221.3686 |
| CardioEmbolicStroke | s_Prevotella_disiens              | Weighted median           | 9 | 0.0759  | 0.0786 | 0.3342 | -0.0664 | 0.1179 | 0.5908 | 11.9475 | 0.1023 | 221.3686 |
| CardioEmbolicStroke | s_Prevotella_disiens              | Inverse variance weighted | 9 | 0.0742  | 0.0676 | 0.2719 | -0.0664 | 0.1179 | 0.5908 | 11.9475 | 0.1023 | 221.3686 |
| CardioEmbolicStroke | s_Prevotella_disiens              | Simple mode               | 9 | 0.0821  | 0.1272 | 0.5367 | -0.0664 | 0.1179 | 0.5908 | 11.9475 | 0.1023 | 221.3686 |
| CardioEmbolicStroke | s_Prevotella_disiens              | Weighted mode             | 9 | 0.1002  | 0.1266 | 0.4518 | -0.0664 | 0.1179 | 0.5908 | 11.9475 | 0.1023 | 221.3686 |
| CardioEmbolicStroke | s_Prevotella_oris                 | MR Egger                  | 9 | 0.0641  | 0.3325 | 0.8526 | -0.0113 | 0.0848 | 0.8981 | 3.5982  | 0.8247 | 823.1935 |
| CardioEmbolicStroke | s_Prevotella_oris                 | Weighted median           | 9 | 0.0372  | 0.0669 | 0.5784 | -0.0113 | 0.0848 | 0.8981 | 3.5982  | 0.8247 | 823.1935 |
| CardioEmbolicStroke | s_Prevotella_oris                 | Inverse variance weighted | 9 | 0.0204  | 0.0508 | 0.6876 | -0.0113 | 0.0848 | 0.8981 | 3.5982  | 0.8247 | 823.1935 |
| CardioEmbolicStroke | s_Prevotella_oris                 | Simple mode               | 9 | -0.0443 | 0.0998 | 0.6688 | -0.0113 | 0.0848 | 0.8981 | 3.5982  | 0.8247 | 823.1935 |
| CardioEmbolicStroke | s_Prevotella_oris                 | Weighted mode             | 9 | 0.0489  | 0.1005 | 0.6396 | -0.0113 | 0.0848 | 0.8981 | 3.5982  | 0.8247 | 823.1935 |
| CardioEmbolicStroke | s_Prevotella_tanneriae            | MR Egger                  | 9 | 0.9098  | 0.6800 | 0.2228 | -0.2040 | 0.1735 | 0.2780 | 14.6117 | 0.0671 | 112.7448 |
| CardioEmbolicStroke | s_Prevotella_tanneriae            | Weighted median           | 9 | 0.1472  | 0.1199 | 0.2197 | -0.2040 | 0.1735 | 0.2780 | 14.6117 | 0.0671 | 112.7448 |
| CardioEmbolicStroke | s_Prevotella_tanneriae            | Inverse variance weighted | 9 | 0.1195  | 0.1064 | 0.2615 | -0.2040 | 0.1735 | 0.2780 | 14.6117 | 0.0671 | 112.7448 |
| CardioEmbolicStroke | s_Prevotella_tanneriae            | Simple mode               | 9 | 0.3250  | 0.2222 | 0.1817 | -0.2040 | 0.1735 | 0.2780 | 14.6117 | 0.0671 | 112.7448 |
| CardioEmbolicStroke | s_Prevotella_tanneriae            | Weighted mode             | 9 | 0.2529  | 0.2149 | 0.2731 | -0.2040 | 0.1735 | 0.2780 | 14.6117 | 0.0671 | 112.7448 |
| CardioEmbolicStroke | s_Prevotella_timonensis           | MR Egger                  | 9 | 0.4040  | 0.3940 | 0.3392 | -0.0810 | 0.1005 | 0.4469 | 7.0656  | 0.4221 | 191.8489 |
| CardioEmbolicStroke | s_Prevotella_timonensis           | Weighted median           | 9 | 0.0484  | 0.0808 | 0.5492 | -0.0810 | 0.1005 | 0.4469 | 7.0656  | 0.4221 | 191.8489 |
| CardioEmbolicStroke | s_Prevotella_timonensis           | Inverse variance weighted | 9 | 0.0904  | 0.0600 | 0.1319 | -0.0810 | 0.1005 | 0.4469 | 7.0656  | 0.4221 | 191.8489 |
| CardioEmbolicStroke | s_Prevotella_timonensis           | Simple mode               | 9 | 0.0738  | 0.1139 | 0.5354 | -0.0810 | 0.1005 | 0.4469 | 7.0656  | 0.4221 | 191.8489 |
| CardioEmbolicStroke | s_Prevotella_timonensis           | Weighted mode             | 9 | 0.0401  | 0.1040 | 0.7096 | -0.0810 | 0.1005 | 0.4469 | 7.0656  | 0.4221 | 191.8489 |
| CardioEmbolicStroke | s_Providencia_rettgeri            | MR Egger                  | 9 | -0.2907 | 0.5976 | 0.6415 | 0.0335  | 0.1525 | 0.8322 | 4.2274  | 0.7532 | 244.5861 |
| CardioEmbolicStroke | s_Providencia_rettgeri            | Weighted median           | 9 | -0.1678 | 0.1227 | 0.1715 | 0.0335  | 0.1525 | 0.8322 | 4.2274  | 0.7532 | 244.5861 |
| CardioEmbolicStroke | s_Providencia_rettgeri            | Inverse variance weighted | 9 | -0.1608 | 0.0913 | 0.0784 | 0.0335  | 0.1525 | 0.8322 | 4.2274  | 0.7532 | 244.5861 |
| CardioEmbolicStroke | s_Providencia_rettgeri            | Simple mode               | 9 | -0.1507 | 0.1898 | 0.4502 | 0.0335  | 0.1525 | 0.8322 | 4.2274  | 0.7532 | 244.5861 |
| CardioEmbolicStroke | s_Providencia_rettgeri            | Weighted mode             | 9 | -0.1248 | 0.1977 | 0.5456 | 0.0335  | 0.1525 | 0.8322 | 4.2274  | 0.7532 | 244.5861 |
| CardioEmbolicStroke | s_Pseudoflavonifractor_capillosus | MR Egger                  | 9 | 0.0870  | 0.3421 | 0.8065 | -0.0331 | 0.0873 | 0.7155 | 10.8361 | 0.1459 | 573.8875 |
| CardioEmbolicStroke | s_Pseudoflavonifractor_capillosus | Weighted median           | 9 | -0.0463 | 0.0572 | 0.4183 | -0.0331 | 0.0873 | 0.7155 | 10.8361 | 0.1459 | 573.8875 |
| CardioEmbolicStroke | s_Pseudoflavonifractor_capillosus | Inverse variance weighted | 9 | -0.0413 | 0.0494 | 0.4031 | -0.0331 | 0.0873 | 0.7155 | 10.8361 | 0.1459 | 573.8875 |

|                     |                                   |                           |   |         |        |        |         |        |        |         |        |          |
|---------------------|-----------------------------------|---------------------------|---|---------|--------|--------|---------|--------|--------|---------|--------|----------|
| CardioEmbolicStroke | s_Pseudoflavonifractor_capillosus | Simple mode               | 9 | -0.0354 | 0.0830 | 0.6807 | -0.0331 | 0.0873 | 0.7155 | 10.8361 | 0.1459 | 573.8875 |
| CardioEmbolicStroke | s_Pseudoflavonifractor_capillosus | Weighted mode             | 9 | -0.0371 | 0.0690 | 0.6051 | -0.0331 | 0.0873 | 0.7155 | 10.8361 | 0.1459 | 573.8875 |
| CardioEmbolicStroke | s_Roseburia_intestinalis          | MR Egger                  | 9 | 0.2822  | 0.8529 | 0.7504 | -0.0636 | 0.2176 | 0.7785 | 22.2061 | 0.0023 | 130.0538 |
| CardioEmbolicStroke | s_Roseburia_intestinalis          | Weighted median           | 9 | 0.2362  | 0.1168 | 0.0432 | -0.0636 | 0.2176 | 0.7785 | 22.2061 | 0.0023 | 130.0538 |
| CardioEmbolicStroke | s_Roseburia_intestinalis          | Inverse variance weighted | 9 | 0.0358  | 0.1226 | 0.7704 | -0.0636 | 0.2176 | 0.7785 | 22.2061 | 0.0023 | 130.0538 |
| CardioEmbolicStroke | s_Roseburia_intestinalis          | Simple mode               | 9 | 0.2934  | 0.2705 | 0.3096 | -0.0636 | 0.2176 | 0.7785 | 22.2061 | 0.0023 | 130.0538 |
| CardioEmbolicStroke | s_Roseburia_intestinalis          | Weighted mode             | 9 | 0.2801  | 0.1998 | 0.1986 | -0.0636 | 0.2176 | 0.7785 | 22.2061 | 0.0023 | 130.0538 |
| CardioEmbolicStroke | s_Ruminococcus_albus              | MR Egger                  | 9 | -0.0746 | 0.9048 | 0.9366 | 0.0056  | 0.2308 | 0.9814 | 13.5289 | 0.0602 | 68.4215  |
| CardioEmbolicStroke | s_Ruminococcus_albus              | Weighted median           | 9 | -0.1536 | 0.1451 | 0.2897 | 0.0056  | 0.2308 | 0.9814 | 13.5289 | 0.0602 | 68.4215  |
| CardioEmbolicStroke | s_Ruminococcus_albus              | Inverse variance weighted | 9 | -0.0530 | 0.1294 | 0.6822 | 0.0056  | 0.2308 | 0.9814 | 13.5289 | 0.0602 | 68.4215  |
| CardioEmbolicStroke | s_Ruminococcus_albus              | Simple mode               | 9 | -0.2037 | 0.2378 | 0.4166 | 0.0056  | 0.2308 | 0.9814 | 13.5289 | 0.0602 | 68.4215  |
| CardioEmbolicStroke | s_Ruminococcus_albus              | Weighted mode             | 9 | -0.1909 | 0.2643 | 0.4906 | 0.0056  | 0.2308 | 0.9814 | 13.5289 | 0.0602 | 68.4215  |
| CardioEmbolicStroke | s_Ruminococcus_bromii             | MR Egger                  | 9 | -0.2040 | 0.7962 | 0.8052 | 0.0334  | 0.2031 | 0.8740 | 8.2124  | 0.3142 | 154.6394 |
| CardioEmbolicStroke | s_Ruminococcus_bromii             | Weighted median           | 9 | -0.0159 | 0.1528 | 0.9172 | 0.0334  | 0.2031 | 0.8740 | 8.2124  | 0.3142 | 154.6394 |
| CardioEmbolicStroke | s_Ruminococcus_bromii             | Inverse variance weighted | 9 | -0.0745 | 0.1140 | 0.5133 | 0.0334  | 0.2031 | 0.8740 | 8.2124  | 0.3142 | 154.6394 |
| CardioEmbolicStroke | s_Ruminococcus_bromii             | Simple mode               | 9 | 0.0378  | 0.2572 | 0.8867 | 0.0334  | 0.2031 | 0.8740 | 8.2124  | 0.3142 | 154.6394 |
| CardioEmbolicStroke | s_Ruminococcus_bromii             | Weighted mode             | 9 | 0.0623  | 0.2419 | 0.8032 | 0.0334  | 0.2031 | 0.8740 | 8.2124  | 0.3142 | 154.6394 |
| CardioEmbolicStroke | s_Ruminococcus_champanellensis    | MR Egger                  | 9 | 0.1697  | 1.1927 | 0.8909 | -0.0644 | 0.3043 | 0.8385 | 21.2735 | 0.0034 | 40.9375  |
| CardioEmbolicStroke | s_Ruminococcus_champanellensis    | Weighted median           | 9 | -0.2349 | 0.1634 | 0.1507 | -0.0644 | 0.3043 | 0.8385 | 21.2735 | 0.0034 | 40.9375  |
| CardioEmbolicStroke | s_Ruminococcus_champanellensis    | Inverse variance weighted | 9 | -0.0797 | 0.1711 | 0.6412 | -0.0644 | 0.3043 | 0.8385 | 21.2735 | 0.0034 | 40.9375  |
| CardioEmbolicStroke | s_Ruminococcus_champanellensis    | Simple mode               | 9 | -0.2704 | 0.2425 | 0.2973 | -0.0644 | 0.3043 | 0.8385 | 21.2735 | 0.0034 | 40.9375  |
| CardioEmbolicStroke | s_Ruminococcus_champanellensis    | Weighted mode             | 9 | -0.2480 | 0.2837 | 0.4076 | -0.0644 | 0.3043 | 0.8385 | 21.2735 | 0.0034 | 40.9375  |
| CardioEmbolicStroke | s_Ruminococcus_gnavus             | MR Egger                  | 9 | 0.7251  | 0.4343 | 0.1389 | -0.1527 | 0.1108 | 0.2106 | 8.0183  | 0.4317 | NA       |
| CardioEmbolicStroke | s_Ruminococcus_gnavus             | Weighted median           | 9 | 0.0951  | 0.0883 | 0.2818 | -0.1527 | 0.1108 | 0.2106 | 8.0183  | 0.4317 | NA       |
| CardioEmbolicStroke | s_Ruminococcus_gnavus             | Inverse variance weighted | 9 | 0.1337  | 0.0665 | 0.0443 | -0.1527 | 0.1108 | 0.2106 | 8.0183  | 0.4317 | NA       |
| CardioEmbolicStroke | s_Ruminococcus_gnavus             | Simple mode               | 9 | 0.1313  | 0.1337 | 0.3551 | -0.1527 | 0.1108 | 0.2106 | 8.0183  | 0.4317 | NA       |
| CardioEmbolicStroke | s_Ruminococcus_gnavus             | Weighted mode             | 9 | 0.1022  | 0.1259 | 0.4402 | -0.1527 | 0.1108 | 0.2106 | 8.0183  | 0.4317 | NA       |
| CardioEmbolicStroke | s_Ruminococcus_lactaris           | MR Egger                  | 9 | 0.2542  | 0.4296 | 0.5726 | -0.0647 | 0.1096 | 0.5732 | 7.1340  | 0.4151 | 437.2125 |
| CardioEmbolicStroke | s_Ruminococcus_lactaris           | Weighted median           | 9 | -0.0146 | 0.0865 | 0.8659 | -0.0647 | 0.1096 | 0.5732 | 7.1340  | 0.4151 | 437.2125 |
| CardioEmbolicStroke | s_Ruminococcus_lactaris           | Inverse variance weighted | 9 | 0.0034  | 0.0650 | 0.9584 | -0.0647 | 0.1096 | 0.5732 | 7.1340  | 0.4151 | 437.2125 |
| CardioEmbolicStroke | s_Ruminococcus_lactaris           | Simple mode               | 9 | -0.0422 | 0.1393 | 0.7698 | -0.0647 | 0.1096 | 0.5732 | 7.1340  | 0.4151 | 437.2125 |
| CardioEmbolicStroke | s_Ruminococcus_lactaris           | Weighted mode             | 9 | -0.0379 | 0.1255 | 0.7704 | -0.0647 | 0.1096 | 0.5732 | 7.1340  | 0.4151 | 437.2125 |
| CardioEmbolicStroke | s_Ruminococcus_obeum              | MR Egger                  | 9 | 0.4935  | 0.3172 | 0.1637 | -0.1358 | 0.0809 | 0.1373 | 16.7075 | 0.0333 | NA       |
| CardioEmbolicStroke | s_Ruminococcus_obeum              | Weighted median           | 9 | 0.0131  | 0.0541 | 0.8090 | -0.1358 | 0.0809 | 0.1373 | 16.7075 | 0.0333 | NA       |
| CardioEmbolicStroke | s_Ruminococcus_obeum              | Inverse variance weighted | 9 | -0.0325 | 0.0537 | 0.5446 | -0.1358 | 0.0809 | 0.1373 | 16.7075 | 0.0333 | NA       |
| CardioEmbolicStroke | s_Ruminococcus_obeum              | Simple mode               | 9 | 0.0976  | 0.1262 | 0.4613 | -0.1358 | 0.0809 | 0.1373 | 16.7075 | 0.0333 | NA       |
| CardioEmbolicStroke | s_Ruminococcus_obeum              | Weighted mode             | 9 | 0.0918  | 0.0954 | 0.3638 | -0.1358 | 0.0809 | 0.1373 | 16.7075 | 0.0333 | NA       |
| CardioEmbolicStroke | s_Ruminococcus_torques            | MR Egger                  | 9 | 0.0068  | 0.2899 | 0.9819 | -0.0061 | 0.0740 | 0.9365 | 6.0372  | 0.5354 | NA       |
| CardioEmbolicStroke | s_Ruminococcus_torques            | Weighted median           | 9 | -0.0583 | 0.0608 | 0.3375 | -0.0061 | 0.0740 | 0.9365 | 6.0372  | 0.5354 | NA       |
| CardioEmbolicStroke | s_Ruminococcus_torques            | Inverse variance weighted | 9 | -0.0168 | 0.0443 | 0.7037 | -0.0061 | 0.0740 | 0.9365 | 6.0372  | 0.5354 | NA       |
| CardioEmbolicStroke | s_Ruminococcus_torques            | Simple mode               | 9 | -0.0925 | 0.0986 | 0.3754 | -0.0061 | 0.0740 | 0.9365 | 6.0372  | 0.5354 | NA       |
| CardioEmbolicStroke | s_Salmonella_enterica             | Weighted mode             | 9 | -0.0897 | 0.0864 | 0.3296 | -0.0061 | 0.0740 | 0.9365 | 6.0372  | 0.5354 | NA       |
| CardioEmbolicStroke | s_Salmonella_enterica             | MR Egger                  | 9 | -0.4105 | 0.6007 | 0.5163 | 0.0599  | 0.1533 | 0.7076 | 5.3737  | 0.6145 | 177.5499 |
| CardioEmbolicStroke | s_Salmonella_enterica             | Weighted median           | 9 | -0.1549 | 0.1292 | 0.2305 | 0.0599  | 0.1533 | 0.7076 | 5.3737  | 0.6145 | 177.5499 |
| CardioEmbolicStroke | s_Salmonella_enterica             | Inverse variance weighted | 9 | -0.1785 | 0.0918 | 0.0519 | 0.0599  | 0.1533 | 0.7076 | 5.3737  | 0.6145 | 177.5499 |
| CardioEmbolicStroke | s_Salmonella_enterica             | Simple mode               | 9 | -0.3277 | 0.2095 | 0.1564 | 0.0599  | 0.1533 | 0.7076 | 5.3737  | 0.6145 | 177.5499 |
| CardioEmbolicStroke | s_Salmonella_enterica             | Weighted mode             | 9 | -0.3533 | 0.2230 | 0.1518 | 0.0599  | 0.1533 | 0.7076 | 5.3737  | 0.6145 | 177.5499 |
| CardioEmbolicStroke | s_Streptococcus_anginosus         | MR Egger                  | 9 | 0.0165  | 0.5085 | 0.9750 | -0.0164 | 0.1297 | 0.9032 | 6.9937  | 0.4295 | 322.1162 |
| CardioEmbolicStroke | s_Streptococcus_anginosus         | Weighted median           | 9 | 0.0348  | 0.1049 | 0.7400 | -0.0164 | 0.1297 | 0.9032 | 6.9937  | 0.4295 | 322.1162 |
| CardioEmbolicStroke | s_Streptococcus_anginosus         | Inverse variance weighted | 9 | -0.0469 | 0.0777 | 0.5461 | -0.0164 | 0.1297 | 0.9032 | 6.9937  | 0.4295 | 322.1162 |
| CardioEmbolicStroke | s_Streptococcus_anginosus         | Simple mode               | 9 | 0.1393  | 0.1758 | 0.4511 | -0.0164 | 0.1297 | 0.9032 | 6.9937  | 0.4295 | 322.1162 |
| CardioEmbolicStroke | s_Streptococcus_anginosus         | Weighted mode             | 9 | 0.1309  | 0.1799 | 0.4878 | -0.0164 | 0.1297 | 0.9032 | 6.9937  | 0.4295 | 322.1162 |
| CardioEmbolicStroke | s_Streptococcus_australis         | MR Egger                  | 9 | 0.1378  | 0.4306 | 0.7582 | -0.0452 | 0.1099 | 0.6931 | 4.7953  | 0.6849 | 517.6645 |
| CardioEmbolicStroke | s_Streptococcus_australis         | Weighted median           | 9 | -0.0968 | 0.0861 | 0.2605 | -0.0452 | 0.1099 | 0.6931 | 4.7953  | 0.6849 | 517.6645 |
| CardioEmbolicStroke | s_Streptococcus_australis         | Inverse variance weighted | 9 | -0.0373 | 0.0658 | 0.5714 | -0.0452 | 0.1099 | 0.6931 | 4.7953  | 0.6849 | 517.6645 |
| CardioEmbolicStroke | s_Streptococcus_australis         | Simple mode               | 9 | -0.1161 | 0.1286 | 0.3931 | -0.0452 | 0.1099 | 0.6931 | 4.7953  | 0.6849 | 517.6645 |
| CardioEmbolicStroke | s_Streptococcus_australis         | Weighted mode             | 9 | -0.1141 | 0.1431 | 0.4480 | -0.0452 | 0.1099 | 0.6931 | 4.7953  | 0.6849 | 517.6645 |
| CardioEmbolicStroke | s_Streptococcus_dysgalactiae      | MR Egger                  | 9 | 0.4001  | 0.3076 | 0.2345 | -0.1046 | 0.0785 | 0.2245 | 11.0227 | 0.2004 | 468.5065 |
| CardioEmbolicStroke | s_Streptococcus_dysgalactiae      | Weighted median           | 9 | 0.0497  | 0.0571 | 0.3843 | -0.1046 | 0.0785 | 0.2245 | 11.0227 | 0.2004 | 468.5065 |
| CardioEmbolicStroke | s_Streptococcus_dysgalactiae      | Inverse variance weighted | 9 | -0.0049 | 0.0492 | 0.9203 | -0.1046 | 0.0785 | 0.2245 | 11.0227 | 0.2004 | 468.5065 |
| CardioEmbolicStroke | s_Streptococcus_dysgalactiae      | Simple mode               | 9 | 0.0486  | 0.0829 | 0.5741 | -0.1046 | 0.0785 | 0.2245 | 11.0227 | 0.2004 | 468.5065 |

|                     |                               |                           |   |         |        |        |         |        |        |         |        |          |
|---------------------|-------------------------------|---------------------------|---|---------|--------|--------|---------|--------|--------|---------|--------|----------|
| CardioEmbolicStroke | s_Streptococcus_dysgalactiae  | Weighted mode             | 9 | 0.0520  | 0.0801 | 0.5346 | -0.1046 | 0.0785 | 0.2245 | 11.0227 | 0.2004 | 468.5065 |
| CardioEmbolicStroke | s_Streptococcus_gallolyticus  | MR Egger                  | 9 | 0.6849  | 0.5070 | 0.2188 | -0.1456 | 0.1293 | 0.2975 | 7.2592  | 0.5089 | 206.6127 |
| CardioEmbolicStroke | s_Streptococcus_gallolyticus  | Weighted median           | 9 | 0.1320  | 0.1047 | 0.2073 | -0.1456 | 0.1293 | 0.2975 | 7.2592  | 0.5089 | 206.6127 |
| CardioEmbolicStroke | s_Streptococcus_gallolyticus  | Inverse variance weighted | 9 | 0.1210  | 0.0775 | 0.1185 | -0.1456 | 0.1293 | 0.2975 | 7.2592  | 0.5089 | 206.6127 |
| CardioEmbolicStroke | s_Streptococcus_gallolyticus  | Simple mode               | 9 | -0.0009 | 0.1734 | 0.9961 | -0.1456 | 0.1293 | 0.2975 | 7.2592  | 0.5089 | 206.6127 |
| CardioEmbolicStroke | s_Streptococcus_gallolyticus  | Weighted mode             | 9 | 0.1720  | 0.1560 | 0.3023 | -0.1456 | 0.1293 | 0.2975 | 7.2592  | 0.5089 | 206.6127 |
| CardioEmbolicStroke | s_Streptococcus_gordonii      | MR Egger                  | 9 | 0.4078  | 0.4369 | 0.3817 | -0.1199 | 0.1115 | 0.3176 | 6.5421  | 0.5867 | 413.2959 |
| CardioEmbolicStroke | s_Streptococcus_gordonii      | Weighted median           | 9 | -0.0819 | 0.0881 | 0.3522 | -0.1199 | 0.1115 | 0.3176 | 6.5421  | 0.5867 | 413.2959 |
| CardioEmbolicStroke | s_Streptococcus_gordonii      | Inverse variance weighted | 9 | -0.0568 | 0.0668 | 0.3950 | -0.1199 | 0.1115 | 0.3176 | 6.5421  | 0.5867 | 413.2959 |
| CardioEmbolicStroke | s_Streptococcus_gordonii      | Simple mode               | 9 | -0.0867 | 0.1604 | 0.6038 | -0.1199 | 0.1115 | 0.3176 | 6.5421  | 0.5867 | 413.2959 |
| CardioEmbolicStroke | s_Streptococcus_gordonii      | Weighted mode             | 9 | -0.1061 | 0.1624 | 0.5319 | -0.1199 | 0.1115 | 0.3176 | 6.5421  | 0.5867 | 413.2959 |
| CardioEmbolicStroke | s_Streptococcus_infantarius   | MR Egger                  | 9 | 0.5371  | 0.6619 | 0.4438 | -0.1520 | 0.1689 | 0.3979 | 5.4011  | 0.6111 | 242.0520 |
| CardioEmbolicStroke | s_Streptococcus_infantarius   | Weighted median           | 9 | 0.0670  | 0.1330 | 0.6144 | -0.1520 | 0.1689 | 0.3979 | 5.4011  | 0.6111 | 242.0520 |
| CardioEmbolicStroke | s_Streptococcus_infantarius   | Inverse variance weighted | 9 | -0.0517 | 0.1011 | 0.6092 | -0.1520 | 0.1689 | 0.3979 | 5.4011  | 0.6111 | 242.0520 |
| CardioEmbolicStroke | s_Streptococcus_infantarius   | Simple mode               | 9 | 0.1113  | 0.2141 | 0.6174 | -0.1520 | 0.1689 | 0.3979 | 5.4011  | 0.6111 | 242.0520 |
| CardioEmbolicStroke | s_Streptococcus_infantarius   | Weighted mode             | 9 | 0.1268  | 0.2168 | 0.5747 | -0.1520 | 0.1689 | 0.3979 | 5.4011  | 0.6111 | 242.0520 |
| CardioEmbolicStroke | s_Streptococcus_infantis      | MR Egger                  | 9 | 0.3279  | 0.3609 | 0.3938 | -0.0851 | 0.0921 | 0.3862 | 4.7238  | 0.6936 | 644.9002 |
| CardioEmbolicStroke | s_Streptococcus_infantis      | Weighted median           | 9 | 0.0094  | 0.0755 | 0.9005 | -0.0851 | 0.0921 | 0.3862 | 4.7238  | 0.6936 | 644.9002 |
| CardioEmbolicStroke | s_Streptococcus_infantis      | Inverse variance weighted | 9 | -0.0017 | 0.0552 | 0.9756 | -0.0851 | 0.0921 | 0.3862 | 4.7238  | 0.6936 | 644.9002 |
| CardioEmbolicStroke | s_Streptococcus_infantis      | Simple mode               | 9 | 0.0073  | 0.1151 | 0.9507 | -0.0851 | 0.0921 | 0.3862 | 4.7238  | 0.6936 | 644.9002 |
| CardioEmbolicStroke | s_Streptococcus_infantis      | Weighted mode             | 9 | 0.0322  | 0.1173 | 0.7909 | -0.0851 | 0.0921 | 0.3862 | 4.7238  | 0.6936 | 644.9002 |
| CardioEmbolicStroke | s_Streptococcus_mitis         | MR Egger                  | 9 | -0.0432 | 0.3684 | 0.9099 | 0.0081  | 0.0940 | 0.9338 | 4.6651  | 0.7008 | 657.8989 |
| CardioEmbolicStroke | s_Streptococcus_mitis         | Weighted median           | 9 | 0.0029  | 0.0745 | 0.9685 | 0.0081  | 0.0940 | 0.9338 | 4.6651  | 0.7008 | 657.8989 |
| CardioEmbolicStroke | s_Streptococcus_mitis         | Inverse variance weighted | 9 | -0.0119 | 0.0563 | 0.8325 | 0.0081  | 0.0940 | 0.9338 | 4.6651  | 0.7008 | 657.8989 |
| CardioEmbolicStroke | s_Streptococcus_mitis         | Simple mode               | 9 | 0.0701  | 0.1218 | 0.5806 | 0.0081  | 0.0940 | 0.9338 | 4.6651  | 0.7008 | 657.8989 |
| CardioEmbolicStroke | s_Streptococcus_mitis         | Weighted mode             | 9 | 0.0800  | 0.1131 | 0.4993 | 0.0081  | 0.0940 | 0.9338 | 4.6651  | 0.7008 | 657.8989 |
| CardioEmbolicStroke | s_Streptococcus_mutans        | MR Egger                  | 9 | 0.6348  | 0.4930 | 0.2388 | -0.1570 | 0.1258 | 0.2522 | 12.6575 | 0.1242 | 302.6784 |
| CardioEmbolicStroke | s_Streptococcus_mutans        | Weighted median           | 9 | 0.0707  | 0.0857 | 0.4096 | -0.1570 | 0.1258 | 0.2522 | 12.6575 | 0.1242 | 302.6784 |
| CardioEmbolicStroke | s_Streptococcus_mutans        | Inverse variance weighted | 9 | 0.0268  | 0.0779 | 0.7312 | -0.1570 | 0.1258 | 0.2522 | 12.6575 | 0.1242 | 302.6784 |
| CardioEmbolicStroke | s_Streptococcus_mutans        | Simple mode               | 9 | 0.0196  | 0.1304 | 0.8845 | -0.1570 | 0.1258 | 0.2522 | 12.6575 | 0.1242 | 302.6784 |
| CardioEmbolicStroke | s_Streptococcus_mutans        | Weighted mode             | 9 | 0.1252  | 0.1264 | 0.3509 | -0.1570 | 0.1258 | 0.2522 | 12.6575 | 0.1242 | 302.6784 |
| CardioEmbolicStroke | s_Streptococcus_oralis        | MR Egger                  | 9 | 0.0245  | 0.4154 | 0.9547 | -0.0050 | 0.1060 | 0.9638 | 4.2676  | 0.7485 | 636.2746 |
| CardioEmbolicStroke | s_Streptococcus_oralis        | Weighted median           | 9 | -0.0350 | 0.0840 | 0.6771 | -0.0050 | 0.1060 | 0.9638 | 4.2676  | 0.7485 | 636.2746 |
| CardioEmbolicStroke | s_Streptococcus_oralis        | Inverse variance weighted | 9 | 0.0051  | 0.0635 | 0.9358 | -0.0050 | 0.1060 | 0.9638 | 4.2676  | 0.7485 | 636.2746 |
| CardioEmbolicStroke | s_Streptococcus_oralis        | Simple mode               | 9 | -0.1187 | 0.1441 | 0.4340 | -0.0050 | 0.1060 | 0.9638 | 4.2676  | 0.7485 | 636.2746 |
| CardioEmbolicStroke | s_Streptococcus_oralis        | Weighted mode             | 9 | -0.1187 | 0.1371 | 0.4116 | -0.0050 | 0.1060 | 0.9638 | 4.2676  | 0.7485 | 636.2746 |
| CardioEmbolicStroke | s_Streptococcus_parasanguinis | MR Egger                  | 9 | 0.7677  | 0.5108 | 0.1765 | -0.2162 | 0.1303 | 0.1410 | 7.8224  | 0.4510 | 261.0893 |
| CardioEmbolicStroke | s_Streptococcus_parasanguinis | Weighted median           | 9 | -0.1812 | 0.1103 | 0.1003 | -0.2162 | 0.1303 | 0.1410 | 7.8224  | 0.4510 | 261.0893 |
| CardioEmbolicStroke | s_Streptococcus_parasanguinis | Inverse variance weighted | 9 | -0.0698 | 0.0781 | 0.3715 | -0.2162 | 0.1303 | 0.1410 | 7.8224  | 0.4510 | 261.0893 |
| CardioEmbolicStroke | s_Streptococcus_parasanguinis | Simple mode               | 9 | -0.2424 | 0.1925 | 0.2434 | -0.2162 | 0.1303 | 0.1410 | 7.8224  | 0.4510 | 261.0893 |
| CardioEmbolicStroke | s_Streptococcus_parasanguinis | Weighted mode             | 9 | -0.2424 | 0.2235 | 0.3098 | -0.2162 | 0.1303 | 0.1410 | 7.8224  | 0.4510 | 261.0893 |
| CardioEmbolicStroke | s_Streptococcus_pneumoniae    | MR Egger                  | 9 | 0.2116  | 0.3615 | 0.5766 | -0.0534 | 0.0922 | 0.5805 | 3.2565  | 0.8603 | 886.4694 |
| CardioEmbolicStroke | s_Streptococcus_pneumoniae    | Weighted median           | 9 | 0.0321  | 0.0699 | 0.6467 | -0.0534 | 0.0922 | 0.5805 | 3.2565  | 0.8603 | 886.4694 |
| CardioEmbolicStroke | s_Streptococcus_pneumoniae    | Inverse variance weighted | 9 | 0.0047  | 0.0552 | 0.9327 | -0.0534 | 0.0922 | 0.5805 | 3.2565  | 0.8603 | 886.4694 |
| CardioEmbolicStroke | s_Streptococcus_pneumoniae    | Simple mode               | 9 | 0.0309  | 0.1079 | 0.7819 | -0.0534 | 0.0922 | 0.5805 | 3.2565  | 0.8603 | 886.4694 |
| CardioEmbolicStroke | s_Streptococcus_pneumoniae    | Weighted mode             | 9 | 0.0488  | 0.1033 | 0.6489 | -0.0534 | 0.0922 | 0.5805 | 3.2565  | 0.8603 | 886.4694 |
| CardioEmbolicStroke | s_Streptococcus_pyogenes      | MR Egger                  | 9 | -0.2986 | 0.7140 | 0.6883 | 0.0904  | 0.1821 | 0.6347 | 5.6465  | 0.5816 | 173.6335 |
| CardioEmbolicStroke | s_Streptococcus_pyogenes      | Weighted median           | 9 | -0.0869 | 0.1426 | 0.5424 | 0.0904  | 0.1821 | 0.6347 | 5.6465  | 0.5816 | 173.6335 |
| CardioEmbolicStroke | s_Streptococcus_pyogenes      | Inverse variance weighted | 9 | 0.0518  | 0.1091 | 0.6351 | 0.0904  | 0.1821 | 0.6347 | 5.6465  | 0.5816 | 173.6335 |
| CardioEmbolicStroke | s_Streptococcus_pyogenes      | Simple mode               | 9 | -0.1265 | 0.2160 | 0.5743 | 0.0904  | 0.1821 | 0.6347 | 5.6465  | 0.5816 | 173.6335 |
| CardioEmbolicStroke | s_Streptococcus_pyogenes      | Weighted mode             | 9 | -0.1237 | 0.1781 | 0.5068 | 0.0904  | 0.1821 | 0.6347 | 5.6465  | 0.5816 | 173.6335 |
| CardioEmbolicStroke | s_Streptococcus_salivarius    | MR Egger                  | 9 | -0.2616 | 0.4808 | 0.6034 | 0.0619  | 0.1227 | 0.6293 | 5.7847  | 0.5651 | 262.5938 |
| CardioEmbolicStroke | s_Streptococcus_salivarius    | Weighted median           | 9 | 0.0483  | 0.0958 | 0.6136 | 0.0619  | 0.1227 | 0.6293 | 5.7847  | 0.5651 | 262.5938 |
| CardioEmbolicStroke | s_Streptococcus_salivarius    | Inverse variance weighted | 9 | -0.0217 | 0.0735 | 0.7675 | 0.0619  | 0.1227 | 0.6293 | 5.7847  | 0.5651 | 262.5938 |
| CardioEmbolicStroke | s_Streptococcus_salivarius    | Simple mode               | 9 | 0.0847  | 0.1480 | 0.5827 | 0.0619  | 0.1227 | 0.6293 | 5.7847  | 0.5651 | 262.5938 |
| CardioEmbolicStroke | s_Streptococcus_salivarius    | Weighted mode             | 9 | 0.0823  | 0.1364 | 0.5628 | 0.0619  | 0.1227 | 0.6293 | 5.7847  | 0.5651 | 262.5938 |
| CardioEmbolicStroke | s_Streptococcus_sanguinis     | MR Egger                  | 9 | 0.3707  | 0.4269 | 0.4140 | -0.0879 | 0.1089 | 0.4464 | 4.8750  | 0.6752 | 516.9904 |
| CardioEmbolicStroke | s_Streptococcus_sanguinis     | Weighted median           | 9 | 0.0605  | 0.0887 | 0.4949 | -0.0879 | 0.1089 | 0.4464 | 4.8750  | 0.6752 | 516.9904 |
| CardioEmbolicStroke | s_Streptococcus_sanguinis     | Inverse variance weighted | 9 | 0.0304  | 0.0652 | 0.6415 | -0.0879 | 0.1089 | 0.4464 | 4.8750  | 0.6752 | 516.9904 |
| CardioEmbolicStroke | s_Streptococcus_sanguinis     | Simple mode               | 9 | 0.0794  | 0.1442 | 0.5970 | -0.0879 | 0.1089 | 0.4464 | 4.8750  | 0.6752 | 516.9904 |
| CardioEmbolicStroke | s_Streptococcus_sanguinis     | Weighted mode             | 9 | 0.0713  | 0.1377 | 0.6188 | -0.0879 | 0.1089 | 0.4464 | 4.8750  | 0.6752 | 516.9904 |

|                     |                                                  |                           |   |         |        |        |         |        |        |         |        |          |
|---------------------|--------------------------------------------------|---------------------------|---|---------|--------|--------|---------|--------|--------|---------|--------|----------|
| CardioEmbolicStroke | s_Streptococcus_suis                             | MR Egger                  | 9 | 0.9403  | 0.6158 | 0.1706 | -0.2192 | 0.1571 | 0.2055 | 10.3164 | 0.2435 | 145.6766 |
| CardioEmbolicStroke | s_Streptococcus_suis                             | Weighted median           | 9 | 0.0048  | 0.1182 | 0.9674 | -0.2192 | 0.1571 | 0.2055 | 10.3164 | 0.2435 | 145.6766 |
| CardioEmbolicStroke | s_Streptococcus_suis                             | Inverse variance weighted | 9 | 0.0911  | 0.0995 | 0.3602 | -0.2192 | 0.1571 | 0.2055 | 10.3164 | 0.2435 | 145.6766 |
| CardioEmbolicStroke | s_Streptococcus_suis                             | Simple mode               | 9 | -0.0799 | 0.1964 | 0.6947 | -0.2192 | 0.1571 | 0.2055 | 10.3164 | 0.2435 | 145.6766 |
| CardioEmbolicStroke | s_Streptococcus_suis                             | Weighted mode             | 9 | -0.0667 | 0.1920 | 0.7372 | -0.2192 | 0.1571 | 0.2055 | 10.3164 | 0.2435 | 145.6766 |
| CardioEmbolicStroke | s_Streptococcus_vestibularis                     | MR Egger                  | 9 | 0.2104  | 0.4743 | 0.6706 | -0.0668 | 0.1210 | 0.5982 | 4.1933  | 0.7573 | 411.1799 |
| CardioEmbolicStroke | s_Streptococcus_vestibularis                     | Weighted median           | 9 | -0.0217 | 0.0897 | 0.8088 | -0.0668 | 0.1210 | 0.5982 | 4.1933  | 0.7573 | 411.1799 |
| CardioEmbolicStroke | s_Streptococcus_vestibularis                     | Inverse variance weighted | 9 | -0.0482 | 0.0725 | 0.5062 | -0.0668 | 0.1210 | 0.5982 | 4.1933  | 0.7573 | 411.1799 |
| CardioEmbolicStroke | s_Streptococcus_vestibularis                     | Simple mode               | 9 | -0.0109 | 0.1513 | 0.9441 | -0.0668 | 0.1210 | 0.5982 | 4.1933  | 0.7573 | 411.1799 |
| CardioEmbolicStroke | s_Streptococcus_vestibularis                     | Weighted mode             | 9 | 0.0516  | 0.1378 | 0.7180 | -0.0668 | 0.1210 | 0.5982 | 4.1933  | 0.7573 | 411.1799 |
| CardioEmbolicStroke | s_Tannerella_forsythia                           | MR Egger                  | 9 | -0.0117 | 0.7313 | 0.9877 | 0.0161  | 0.1865 | 0.9337 | 12.3802 | 0.0887 | 160.2144 |
| CardioEmbolicStroke | s_Tannerella_forsythia                           | Weighted median           | 9 | -0.0136 | 0.1263 | 0.9140 | 0.0161  | 0.1865 | 0.9337 | 12.3802 | 0.0887 | 160.2144 |
| CardioEmbolicStroke | s_Tannerella_forsythia                           | Inverse variance weighted | 9 | 0.0506  | 0.1046 | 0.6285 | 0.0161  | 0.1865 | 0.9337 | 12.3802 | 0.0887 | 160.2144 |
| CardioEmbolicStroke | s_Tannerella_forsythia                           | Simple mode               | 9 | 0.3312  | 0.2116 | 0.1562 | 0.0161  | 0.1865 | 0.9337 | 12.3802 | 0.0887 | 160.2144 |
| CardioEmbolicStroke | s_Tannerella_forsythia                           | Weighted mode             | 9 | -0.0293 | 0.1732 | 0.8701 | 0.0161  | 0.1865 | 0.9337 | 12.3802 | 0.0887 | 160.2144 |
| CardioEmbolicStroke | s_Treponema_denticola                            | MR Egger                  | 9 | 0.2089  | 0.5296 | 0.7050 | -0.0375 | 0.1351 | 0.7893 | 15.2072 | 0.0334 | 299.7276 |
| CardioEmbolicStroke | s_Treponema_denticola                            | Weighted median           | 9 | -0.0141 | 0.0811 | 0.8623 | -0.0375 | 0.1351 | 0.7893 | 15.2072 | 0.0334 | 299.7276 |
| CardioEmbolicStroke | s_Treponema_denticola                            | Inverse variance weighted | 9 | 0.0636  | 0.0761 | 0.4035 | -0.0375 | 0.1351 | 0.7893 | 15.2072 | 0.0334 | 299.7276 |
| CardioEmbolicStroke | s_Treponema_denticola                            | Simple mode               | 9 | -0.0877 | 0.1363 | 0.5380 | -0.0375 | 0.1351 | 0.7893 | 15.2072 | 0.0334 | 299.7276 |
| CardioEmbolicStroke | s_Treponema_denticola                            | Weighted mode             | 9 | -0.0549 | 0.1234 | 0.6682 | -0.0375 | 0.1351 | 0.7893 | 15.2072 | 0.0334 | 299.7276 |
| CardioEmbolicStroke | s_Treponema_vincentii                            | MR Egger                  | 9 | 0.5036  | 0.4193 | 0.2688 | -0.1359 | 0.1070 | 0.2444 | 14.1076 | 0.0790 | 396.7973 |
| CardioEmbolicStroke | s_Treponema_vincentii                            | Weighted median           | 9 | -0.0717 | 0.0725 | 0.3227 | -0.1359 | 0.1070 | 0.2444 | 14.1076 | 0.0790 | 396.7973 |
| CardioEmbolicStroke | s_Treponema_vincentii                            | Inverse variance weighted | 9 | -0.0230 | 0.0665 | 0.7291 | -0.1359 | 0.1070 | 0.2444 | 14.1076 | 0.0790 | 396.7973 |
| CardioEmbolicStroke | s_Treponema_vincentii                            | Simple mode               | 9 | -0.1723 | 0.1264 | 0.2099 | -0.1359 | 0.1070 | 0.2444 | 14.1076 | 0.0790 | 396.7973 |
| CardioEmbolicStroke | s_Treponema_vincentii                            | Weighted mode             | 9 | -0.1617 | 0.1402 | 0.2821 | -0.1359 | 0.1070 | 0.2444 | 14.1076 | 0.0790 | 396.7973 |
| CardioEmbolicStroke | s_Veillonella_atypica                            | MR Egger                  | 9 | 1.3144  | 0.6307 | 0.0756 | -0.3007 | 0.1609 | 0.1039 | 6.1693  | 0.6283 | 142.1769 |
| CardioEmbolicStroke | s_Veillonella_atypica                            | Weighted median           | 9 | 0.1562  | 0.1305 | 0.2316 | -0.3007 | 0.1609 | 0.1039 | 6.1693  | 0.6283 | 142.1769 |
| CardioEmbolicStroke | s_Veillonella_atypica                            | Inverse variance weighted | 9 | 0.1498  | 0.0964 | 0.1202 | -0.3007 | 0.1609 | 0.1039 | 6.1693  | 0.6283 | 142.1769 |
| CardioEmbolicStroke | s_Veillonella_atypica                            | Simple mode               | 9 | -0.0823 | 0.2200 | 0.7180 | -0.3007 | 0.1609 | 0.1039 | 6.1693  | 0.6283 | 142.1769 |
| CardioEmbolicStroke | s_Veillonella_atypica                            | Weighted mode             | 9 | -0.0584 | 0.2112 | 0.7892 | -0.3007 | 0.1609 | 0.1039 | 6.1693  | 0.6283 | 142.1769 |
| CardioEmbolicStroke | s_Veillonella_dispar                             | MR Egger                  | 9 | 0.9415  | 0.6355 | 0.1820 | -0.2003 | 0.1621 | 0.2566 | 4.1851  | 0.8400 | 181.5139 |
| CardioEmbolicStroke | s_Veillonella_dispar                             | Weighted median           | 9 | 0.1451  | 0.1252 | 0.2464 | -0.2003 | 0.1621 | 0.2566 | 4.1851  | 0.8400 | 181.5139 |
| CardioEmbolicStroke | s_Veillonella_dispar                             | Inverse variance weighted | 9 | 0.1657  | 0.0971 | 0.0879 | -0.2003 | 0.1621 | 0.2566 | 4.1851  | 0.8400 | 181.5139 |
| CardioEmbolicStroke | s_Veillonella_dispar                             | Simple mode               | 9 | 0.1718  | 0.1945 | 0.4030 | -0.2003 | 0.1621 | 0.2566 | 4.1851  | 0.8400 | 181.5139 |
| CardioEmbolicStroke | s_Veillonella_dispar                             | Weighted mode             | 9 | 0.1552  | 0.1845 | 0.4247 | -0.2003 | 0.1621 | 0.2566 | 4.1851  | 0.8400 | 181.5139 |
| CardioEmbolicStroke | s_Veillonella_parvula                            | MR Egger                  | 9 | 0.9940  | 0.5695 | 0.1244 | -0.2237 | 0.1453 | 0.1676 | 7.1139  | 0.5244 | 140.9239 |
| CardioEmbolicStroke | s_Veillonella_parvula                            | Weighted median           | 9 | 0.1232  | 0.1208 | 0.3078 | -0.2237 | 0.1453 | 0.1676 | 7.1139  | 0.5244 | 140.9239 |
| CardioEmbolicStroke | s_Veillonella_parvula                            | Inverse variance weighted | 9 | 0.1277  | 0.0871 | 0.1426 | -0.2237 | 0.1453 | 0.1676 | 7.1139  | 0.5244 | 140.9239 |
| CardioEmbolicStroke | s_Veillonella_parvula                            | Simple mode               | 9 | 0.0695  | 0.1776 | 0.7059 | -0.2237 | 0.1453 | 0.1676 | 7.1139  | 0.5244 | 140.9239 |
| CardioEmbolicStroke | s_Veillonella_parvula                            | Weighted mode             | 9 | 0.0957  | 0.1697 | 0.5885 | -0.2237 | 0.1453 | 0.1676 | 7.1139  | 0.5244 | 140.9239 |
| CardioEmbolicStroke | s_butyrate-producing_bacterium                   | MR Egger                  | 9 | 0.5053  | 0.5361 | 0.3772 | -0.1282 | 0.1368 | 0.3798 | 8.6189  | 0.2812 | 250.5416 |
| CardioEmbolicStroke | s_butyrate-producing_bacterium                   | Weighted median           | 9 | -0.0303 | 0.1005 | 0.7631 | -0.1282 | 0.1368 | 0.3798 | 8.6189  | 0.2812 | 250.5416 |
| CardioEmbolicStroke | s_butyrate-producing_bacterium                   | Inverse variance weighted | 9 | 0.0087  | 0.0813 | 0.9145 | -0.1282 | 0.1368 | 0.3798 | 8.6189  | 0.2812 | 250.5416 |
| CardioEmbolicStroke | s_butyrate-producing_bacterium                   | Simple mode               | 9 | -0.1426 | 0.1677 | 0.4199 | -0.1282 | 0.1368 | 0.3798 | 8.6189  | 0.2812 | 250.5416 |
| CardioEmbolicStroke | s_butyrate-producing_bacterium                   | Weighted mode             | 9 | -0.0677 | 0.1332 | 0.6247 | -0.1282 | 0.1368 | 0.3798 | 8.6189  | 0.2812 | 250.5416 |
| CardioEmbolicStroke | s_unclassified_Citrobacter_sp._30_2              | MR Egger                  | 9 | 0.1852  | 0.7185 | 0.8041 | -0.0807 | 0.1833 | 0.6730 | 4.2662  | 0.7487 | 225.8075 |
| CardioEmbolicStroke | s_unclassified_Citrobacter_sp._30_2              | Weighted median           | 9 | -0.2377 | 0.1429 | 0.0963 | -0.0807 | 0.1833 | 0.6730 | 4.2662  | 0.7487 | 225.8075 |
| CardioEmbolicStroke | s_unclassified_Citrobacter_sp._30_2              | Inverse variance weighted | 9 | -0.1275 | 0.1098 | 0.2458 | -0.0807 | 0.1833 | 0.6730 | 4.2662  | 0.7487 | 225.8075 |
| CardioEmbolicStroke | s_unclassified_Citrobacter_sp._30_2              | Simple mode               | 9 | -0.2597 | 0.2457 | 0.3214 | -0.0807 | 0.1833 | 0.6730 | 4.2662  | 0.7487 | 225.8075 |
| CardioEmbolicStroke | s_unclassified_Citrobacter_sp._30_2              | Weighted mode             | 9 | -0.2569 | 0.2164 | 0.2693 | -0.0807 | 0.1833 | 0.6730 | 4.2662  | 0.7487 | 225.8075 |
| CardioEmbolicStroke | s_unclassified_Clostridiales_bacterium_1_7_47FAA | MR Egger                  | 9 | 0.1098  | 0.3582 | 0.7682 | -0.0026 | 0.0914 | 0.9779 | 10.4256 | 0.1657 | 366.2031 |
| CardioEmbolicStroke | s_unclassified_Clostridiales_bacterium_1_7_47FAA | Weighted median           | 9 | 0.1115  | 0.0644 | 0.0835 | -0.0026 | 0.0914 | 0.9779 | 10.4256 | 0.1657 | 366.2031 |
| CardioEmbolicStroke | s_unclassified_Clostridiales_bacterium_1_7_47FAA | Inverse variance weighted | 9 | 0.0996  | 0.0512 | 0.0517 | -0.0026 | 0.0914 | 0.9779 | 10.4256 | 0.1657 | 366.2031 |
| CardioEmbolicStroke | s_unclassified_Clostridiales_bacterium_1_7_47FAA | Simple mode               | 9 | 0.2222  | 0.1172 | 0.0947 | -0.0026 | 0.0914 | 0.9779 | 10.4256 | 0.1657 | 366.2031 |
| CardioEmbolicStroke | s_unclassified_Clostridiales_bacterium_1_7_47FAA | Weighted mode             | 9 | 0.2078  | 0.1215 | 0.1256 | -0.0026 | 0.0914 | 0.9779 | 10.4256 | 0.1657 | 366.2031 |
| CardioEmbolicStroke | s_unclassified_Clostridium_sp._D5                | MR Egger                  | 9 | 0.1584  | 0.3322 | 0.6480 | -0.0368 | 0.0847 | 0.6770 | 6.3374  | 0.5010 | 673.5163 |
| CardioEmbolicStroke | s_unclassified_Clostridium_sp._D5                | Weighted median           | 9 | 0.0682  | 0.0719 | 0.3423 | -0.0368 | 0.0847 | 0.6770 | 6.3374  | 0.5010 | 673.5163 |
| CardioEmbolicStroke | s_unclassified_Clostridium_sp._D5                | Inverse variance weighted | 9 | 0.0158  | 0.0508 | 0.7563 | -0.0368 | 0.0847 | 0.6770 | 6.3374  | 0.5010 | 673.5163 |
| CardioEmbolicStroke | s_unclassified_Clostridium_sp._D5                | Simple mode               | 9 | 0.1017  | 0.1155 | 0.4046 | -0.0368 | 0.0847 | 0.6770 | 6.3374  | 0.5010 | 673.5163 |
| CardioEmbolicStroke | s_unclassified_Clostridium_sp._D5                | Weighted mode             | 9 | 0.1122  | 0.1132 | 0.3508 | -0.0368 | 0.0847 | 0.6770 | 6.3374  | 0.5010 | 673.5163 |
| CardioEmbolicStroke | s_unclassified_Clostridium_sp._HGF2              | MR Egger                  | 9 | -0.1222 | 0.4719 | 0.8031 | 0.0576  | 0.1204 | 0.6471 | 8.9625  | 0.2554 | 239.8646 |

|                     |                                                        |                           |   |         |        |        |         |        |        |         |        |          |
|---------------------|--------------------------------------------------------|---------------------------|---|---------|--------|--------|---------|--------|--------|---------|--------|----------|
| CardioEmbolicStroke | s_unclassified_Clostridium_sp._HGF2                    | Weighted median           | 9 | 0.0608  | 0.0895 | 0.4969 | 0.0576  | 0.1204 | 0.6471 | 8.9625  | 0.2554 | 239.8646 |
| CardioEmbolicStroke | s_unclassified_Clostridium_sp._HGF2                    | Inverse variance weighted | 9 | 0.1008  | 0.0686 | 0.1417 | 0.0576  | 0.1204 | 0.6471 | 8.9625  | 0.2554 | 239.8646 |
| CardioEmbolicStroke | s_unclassified_Clostridium_sp._HGF2                    | Simple mode               | 9 | 0.2574  | 0.1594 | 0.1449 | 0.0576  | 0.1204 | 0.6471 | 8.9625  | 0.2554 | 239.8646 |
| CardioEmbolicStroke | s_unclassified_Clostridium_sp._HGF2                    | Weighted mode             | 9 | -0.0480 | 0.1511 | 0.7590 | 0.0576  | 0.1204 | 0.6471 | 8.9625  | 0.2554 | 239.8646 |
| CardioEmbolicStroke | s_unclassified_Clostridium_sp._L2-50                   | MR Egger                  | 9 | 0.3155  | 0.5899 | 0.6093 | -0.0864 | 0.1505 | 0.5839 | 15.3599 | 0.0317 | 233.4359 |
| CardioEmbolicStroke | s_unclassified_Clostridium_sp._L2-50                   | Weighted median           | 9 | 0.0678  | 0.0867 | 0.4345 | -0.0864 | 0.1505 | 0.5839 | 15.3599 | 0.0317 | 233.4359 |
| CardioEmbolicStroke | s_unclassified_Clostridium_sp._L2-50                   | Inverse variance weighted | 9 | -0.0192 | 0.0863 | 0.8242 | -0.0864 | 0.1505 | 0.5839 | 15.3599 | 0.0317 | 233.4359 |
| CardioEmbolicStroke | s_unclassified_Clostridium_sp._L2-50                   | Simple mode               | 9 | 0.0757  | 0.1520 | 0.6318 | -0.0864 | 0.1505 | 0.5839 | 15.3599 | 0.0317 | 233.4359 |
| CardioEmbolicStroke | s_unclassified_Clostridium_sp._L2-50                   | Weighted mode             | 9 | 0.0966  | 0.1380 | 0.5037 | -0.0864 | 0.1505 | 0.5839 | 15.3599 | 0.0317 | 233.4359 |
| CardioEmbolicStroke | s_unclassified_Clostridium_sp._SY8519                  | MR Egger                  | 9 | 0.2549  | 0.5998 | 0.6836 | -0.0808 | 0.1530 | 0.6138 | 12.0812 | 0.0979 | 232.9859 |
| CardioEmbolicStroke | s_unclassified_Clostridium_sp._SY8519                  | Weighted median           | 9 | -0.0445 | 0.0975 | 0.6482 | -0.0808 | 0.1530 | 0.6138 | 12.0812 | 0.0979 | 232.9859 |
| CardioEmbolicStroke | s_unclassified_Clostridium_sp._SY8519                  | Inverse variance weighted | 9 | -0.0581 | 0.0874 | 0.5064 | -0.0808 | 0.1530 | 0.6138 | 12.0812 | 0.0979 | 232.9859 |
| CardioEmbolicStroke | s_unclassified_Clostridium_sp._SY8519                  | Simple mode               | 9 | -0.0547 | 0.1307 | 0.6868 | -0.0808 | 0.1530 | 0.6138 | 12.0812 | 0.0979 | 232.9859 |
| CardioEmbolicStroke | s_unclassified_Clostridium_sp._SY8519                  | Weighted mode             | 9 | -0.0448 | 0.1261 | 0.7317 | -0.0808 | 0.1530 | 0.6138 | 12.0812 | 0.0979 | 232.9859 |
| CardioEmbolicStroke | s_unclassified_Coprobacillus_sp._29_1                  | MR Egger                  | 9 | 0.0540  | 0.3833 | 0.8920 | -0.0108 | 0.0978 | 0.9152 | 6.2416  | 0.5118 | 555.5624 |
| CardioEmbolicStroke | s_unclassified_Coprobacillus_sp._29_1                  | Weighted median           | 9 | 0.0142  | 0.0777 | 0.8548 | -0.0108 | 0.0978 | 0.9152 | 6.2416  | 0.5118 | 555.5624 |
| CardioEmbolicStroke | s_unclassified_Coprobacillus_sp._29_1                  | Inverse variance weighted | 9 | 0.0122  | 0.0586 | 0.8354 | -0.0108 | 0.0978 | 0.9152 | 6.2416  | 0.5118 | 555.5624 |
| CardioEmbolicStroke | s_unclassified_Coprobacillus_sp._29_1                  | Simple mode               | 9 | 0.0053  | 0.1216 | 0.9665 | -0.0108 | 0.0978 | 0.9152 | 6.2416  | 0.5118 | 555.5624 |
| CardioEmbolicStroke | s_unclassified_Coprobacillus_sp._29_1                  | Weighted mode             | 9 | 0.0191  | 0.1044 | 0.8596 | -0.0108 | 0.0978 | 0.9152 | 6.2416  | 0.5118 | 555.5624 |
| CardioEmbolicStroke | s_unclassified_Desulfovibrio_sp._3_1_syn3              | MR Egger                  | 9 | 0.7338  | 0.8557 | 0.4195 | -0.1819 | 0.2183 | 0.4321 | 10.9957 | 0.1388 | 116.5519 |
| CardioEmbolicStroke | s_unclassified_Desulfovibrio_sp._3_1_syn3              | Weighted median           | 9 | 0.0228  | 0.1518 | 0.8806 | -0.1819 | 0.2183 | 0.4321 | 10.9957 | 0.1388 | 116.5519 |
| CardioEmbolicStroke | s_unclassified_Desulfovibrio_sp._3_1_syn3              | Inverse variance weighted | 9 | 0.0290  | 0.1283 | 0.8211 | -0.1819 | 0.2183 | 0.4321 | 10.9957 | 0.1388 | 116.5519 |
| CardioEmbolicStroke | s_unclassified_Desulfovibrio_sp._3_1_syn3              | Simple mode               | 9 | -0.1755 | 0.2688 | 0.5322 | -0.1819 | 0.2183 | 0.4321 | 10.9957 | 0.1388 | 116.5519 |
| CardioEmbolicStroke | s_unclassified_Desulfovibrio_sp._3_1_syn3              | Weighted mode             | 9 | -0.0627 | 0.2826 | 0.8300 | -0.1819 | 0.2183 | 0.4321 | 10.9957 | 0.1388 | 116.5519 |
| CardioEmbolicStroke | s_unclassified_Eggerthella_sp._YY7918                  | MR Egger                  | 9 | 0.3464  | 0.7056 | 0.6385 | -0.1354 | 0.1800 | 0.4763 | 7.5137  | 0.3774 | 118.7968 |
| CardioEmbolicStroke | s_unclassified_Eggerthella_sp._YY7918                  | Weighted median           | 9 | -0.2001 | 0.1382 | 0.1477 | -0.1354 | 0.1800 | 0.4763 | 7.5137  | 0.3774 | 118.7968 |
| CardioEmbolicStroke | s_unclassified_Eggerthella_sp._YY7918                  | Inverse variance weighted | 9 | -0.1784 | 0.1048 | 0.0888 | -0.1354 | 0.1800 | 0.4763 | 7.5137  | 0.3774 | 118.7968 |
| CardioEmbolicStroke | s_unclassified_Eggerthella_sp._YY7918                  | Simple mode               | 9 | -0.1978 | 0.2226 | 0.4001 | -0.1354 | 0.1800 | 0.4763 | 7.5137  | 0.3774 | 118.7968 |
| CardioEmbolicStroke | s_unclassified_Eggerthella_sp._YY7918                  | Weighted mode             | 9 | -0.1978 | 0.2087 | 0.3710 | -0.1354 | 0.1800 | 0.4763 | 7.5137  | 0.3774 | 118.7968 |
| CardioEmbolicStroke | s_unclassified_Enterobacteriaceae_bacterium_9_2_54FAA  | MR Egger                  | 9 | -0.4870 | 0.6555 | 0.4817 | 0.0990  | 0.1672 | 0.5723 | 6.2668  | 0.5090 | 203.7469 |
| CardioEmbolicStroke | s_unclassified_Enterobacteriaceae_bacterium_9_2_54FAA  | Weighted median           | 9 | -0.0815 | 0.1367 | 0.5511 | 0.0990  | 0.1672 | 0.5723 | 6.2668  | 0.5090 | 203.7469 |
| CardioEmbolicStroke | s_unclassified_Enterobacteriaceae_bacterium_9_2_54FAA  | Inverse variance weighted | 9 | -0.1033 | 0.1002 | 0.3023 | 0.0990  | 0.1672 | 0.5723 | 6.2668  | 0.5090 | 203.7469 |
| CardioEmbolicStroke | s_unclassified_Enterobacteriaceae_bacterium_9_2_54FAA  | Simple mode               | 9 | -0.0171 | 0.2217 | 0.9403 | 0.0990  | 0.1672 | 0.5723 | 6.2668  | 0.5090 | 203.7469 |
| CardioEmbolicStroke | s_unclassified_Enterobacteriaceae_bacterium_9_2_54FAA  | Weighted mode             | 9 | -0.0233 | 0.2116 | 0.9149 | 0.0990  | 0.1672 | 0.5723 | 6.2668  | 0.5090 | 203.7469 |
| CardioEmbolicStroke | s_unclassified_Erysipelotrichaceae_bacterium_3_1_53    | MR Egger                  | 9 | 0.2916  | 0.2312 | 0.2476 | -0.0647 | 0.0590 | 0.3089 | 6.8027  | 0.5581 | 845.4908 |
| CardioEmbolicStroke | s_unclassified_Erysipelotrichaceae_bacterium_3_1_53    | Weighted median           | 9 | 0.0516  | 0.0482 | 0.2851 | -0.0647 | 0.0590 | 0.3089 | 6.8027  | 0.5581 | 845.4908 |
| CardioEmbolicStroke | s_unclassified_Erysipelotrichaceae_bacterium_3_1_53    | Inverse variance weighted | 9 | 0.0410  | 0.0353 | 0.2463 | -0.0647 | 0.0590 | 0.3089 | 6.8027  | 0.5581 | 845.4908 |
| CardioEmbolicStroke | s_unclassified_Erysipelotrichaceae_bacterium_3_1_53    | Simple mode               | 9 | 0.0952  | 0.0720 | 0.2229 | -0.0647 | 0.0590 | 0.3089 | 6.8027  | 0.5581 | 845.4908 |
| CardioEmbolicStroke | s_unclassified_Erysipelotrichaceae_bacterium_3_1_53    | Weighted mode             | 9 | 0.0770  | 0.0679 | 0.2901 | -0.0647 | 0.0590 | 0.3089 | 6.8027  | 0.5581 | 845.4908 |
| CardioEmbolicStroke | s_unclassified_Erysipelotrichaceae_bacterium_5_2_54FAA | MR Egger                  | 9 | 0.3673  | 0.3260 | 0.2971 | -0.1020 | 0.0832 | 0.2597 | 11.4288 | 0.1786 | 532.4592 |
| CardioEmbolicStroke | s_unclassified_Erysipelotrichaceae_bacterium_5_2_54FAA | Weighted median           | 9 | 0.0011  | 0.0594 | 0.9853 | -0.1020 | 0.0832 | 0.2597 | 11.4288 | 0.1786 | 532.4592 |
| CardioEmbolicStroke | s_unclassified_Erysipelotrichaceae_bacterium_5_2_54FAA | Inverse variance weighted | 9 | -0.0279 | 0.0514 | 0.5875 | -0.1020 | 0.0832 | 0.2597 | 11.4288 | 0.1786 | 532.4592 |
| CardioEmbolicStroke | s_unclassified_Erysipelotrichaceae_bacterium_5_2_54FAA | Simple mode               | 9 | 0.0363  | 0.0878 | 0.6901 | -0.1020 | 0.0832 | 0.2597 | 11.4288 | 0.1786 | 532.4592 |
| CardioEmbolicStroke | s_unclassified_Erysipelotrichaceae_bacterium_5_2_54FAA | Weighted mode             | 9 | 0.0200  | 0.0787 | 0.8060 | -0.1020 | 0.0832 | 0.2597 | 11.4288 | 0.1786 | 532.4592 |
| CardioEmbolicStroke | s_unclassified_Lachnospiraceae_bacterium_1_4_56FAA     | MR Egger                  | 9 | 0.4700  | 0.2948 | 0.1549 | -0.1117 | 0.0752 | 0.1810 | 6.0961  | 0.6365 | 673.8104 |
| CardioEmbolicStroke | s_unclassified_Lachnospiraceae_bacterium_1_4_56FAA     | Weighted median           | 9 | 0.0266  | 0.0589 | 0.6517 | -0.1117 | 0.0752 | 0.1810 | 6.0961  | 0.6365 | 673.8104 |
| CardioEmbolicStroke | s_unclassified_Lachnospiraceae_bacterium_1_4_56FAA     | Inverse variance weighted | 9 | 0.0372  | 0.0451 | 0.4086 | -0.1117 | 0.0752 | 0.1810 | 6.0961  | 0.6365 | 673.8104 |
| CardioEmbolicStroke | s_unclassified_Lachnospiraceae_bacterium_1_4_56FAA     | Simple mode               | 9 | 0.0328  | 0.0973 | 0.7445 | -0.1117 | 0.0752 | 0.1810 | 6.0961  | 0.6365 | 673.8104 |
| CardioEmbolicStroke | s_unclassified_Lachnospiraceae_bacterium_1_4_56FAA     | Weighted mode             | 9 | 0.1112  | 0.0959 | 0.2801 | -0.1117 | 0.0752 | 0.1810 | 6.0961  | 0.6365 | 673.8104 |
| CardioEmbolicStroke | s_unclassified_Lachnospiraceae_bacterium_2_1_46FAA     | MR Egger                  | 9 | 0.6440  | 0.6133 | 0.3286 | -0.1436 | 0.1565 | 0.3893 | 17.4762 | 0.0255 | 200.8926 |
| CardioEmbolicStroke | s_unclassified_Lachnospiraceae_bacterium_2_1_46FAA     | Weighted median           | 9 | 0.0204  | 0.0993 | 0.8375 | -0.1436 | 0.1565 | 0.3893 | 17.4762 | 0.0255 | 200.8926 |
| CardioEmbolicStroke | s_unclassified_Lachnospiraceae_bacterium_2_1_46FAA     | Inverse variance weighted | 9 | 0.0878  | 0.0928 | 0.3441 | -0.1436 | 0.1565 | 0.3893 | 17.4762 | 0.0255 | 200.8926 |
| CardioEmbolicStroke | s_unclassified_Lachnospiraceae_bacterium_2_1_46FAA     | Simple mode               | 9 | -0.0030 | 0.1583 | 0.9851 | -0.1436 | 0.1565 | 0.3893 | 17.4762 | 0.0255 | 200.8926 |
| CardioEmbolicStroke | s_unclassified_Lachnospiraceae_bacterium_2_1_46FAA     | Weighted mode             | 9 | 0.0160  | 0.1605 | 0.9232 | -0.1436 | 0.1565 | 0.3893 | 17.4762 | 0.0255 | 200.8926 |
| CardioEmbolicStroke | s_unclassified_Lachnospiraceae_bacterium_3_1_57FAA_CT1 | MR Egger                  | 9 | 0.0188  | 0.3156 | 0.9542 | 0.0060  | 0.0805 | 0.9422 | 6.1310  | 0.5245 | 652.9388 |
| CardioEmbolicStroke | s_unclassified_Lachnospiraceae_bacterium_3_1_57FAA_CT1 | Weighted median           | 9 | 0.0685  | 0.0628 | 0.2749 | 0.0060  | 0.0805 | 0.9422 | 6.1310  | 0.5245 | 652.9388 |
| CardioEmbolicStroke | s_unclassified_Lachnospiraceae_bacterium_3_1_57FAA_CT1 | Inverse variance weighted | 9 | 0.0422  | 0.0482 | 0.3816 | 0.0060  | 0.0805 | 0.9422 | 6.1310  | 0.5245 | 652.9388 |
| CardioEmbolicStroke | s_unclassified_Lachnospiraceae_bacterium_3_1_57FAA_CT1 | Simple mode               | 9 | 0.0621  | 0.1044 | 0.5688 | 0.0060  | 0.0805 | 0.9422 | 6.1310  | 0.5245 | 652.9388 |
| CardioEmbolicStroke | s_unclassified_Lachnospiraceae_bacterium_3_1_57FAA_CT1 | Weighted mode             | 9 | 0.0735  | 0.0960 | 0.4656 | 0.0060  | 0.0805 | 0.9422 | 6.1310  | 0.5245 | 652.9388 |
| CardioEmbolicStroke | s_unclassified_Lachnospiraceae_bacterium_9_1_43BFAA    | MR Egger                  | 9 | -0.1935 | 0.4145 | 0.6549 | 0.1006  | 0.1057 | 0.3731 | 5.3277  | 0.7220 | 262.5123 |
| CardioEmbolicStroke | s_unclassified_Lachnospiraceae_bacterium_9_1_43BFAA    | Weighted median           | 9 | 0.1477  | 0.0835 | 0.0770 | 0.1006  | 0.1057 | 0.3731 | 5.3277  | 0.7220 | 262.5123 |

|                     |                                                     |                           |    |         |        |        |         |        |        |         |        |          |
|---------------------|-----------------------------------------------------|---------------------------|----|---------|--------|--------|---------|--------|--------|---------|--------|----------|
| CardioEmbolicStroke | s_unclassified_Lachnospiraceae_bacterium_9_1_43BFAA | Inverse variance weighted | 9  | 0.1962  | 0.0633 | 0.0019 | 0.1006  | 0.1057 | 0.3731 | 5.3277  | 0.7220 | 262.5123 |
| CardioEmbolicStroke | s_unclassified_Lachnospiraceae_bacterium_9_1_43BFAA | Simple mode               | 9  | 0.1272  | 0.1160 | 0.3047 | 0.1006  | 0.1057 | 0.3731 | 5.3277  | 0.7220 | 262.5123 |
| CardioEmbolicStroke | s_unclassified_Lachnospiraceae_bacterium_9_1_43BFAA | Weighted mode             | 9  | 0.1342  | 0.1091 | 0.2539 | 0.1006  | 0.1057 | 0.3731 | 5.3277  | 0.7220 | 262.5123 |
| CardioEmbolicStroke | s_unclassified_Megasphaera_sp._UPII_135-E           | MR Egger                  | 9  | 0.6940  | 0.3535 | 0.0904 | -0.1747 | 0.0902 | 0.0939 | 11.8853 | 0.1564 | 300.8113 |
| CardioEmbolicStroke | s_unclassified_Megasphaera_sp._UPII_135-E           | Weighted median           | 9  | 0.0719  | 0.0708 | 0.3099 | -0.1747 | 0.0902 | 0.0939 | 11.8853 | 0.1564 | 300.8113 |
| CardioEmbolicStroke | s_unclassified_Megasphaera_sp._UPII_135-E           | Inverse variance weighted | 9  | 0.0172  | 0.0627 | 0.7833 | -0.1747 | 0.0902 | 0.0939 | 11.8853 | 0.1564 | 300.8113 |
| CardioEmbolicStroke | s_unclassified_Megasphaera_sp._UPII_135-E           | Simple mode               | 9  | 0.0790  | 0.1265 | 0.5497 | -0.1747 | 0.0902 | 0.0939 | 11.8853 | 0.1564 | 300.8113 |
| CardioEmbolicStroke | s_unclassified_Megasphaera_sp._UPII_135-E           | Weighted mode             | 9  | 0.0863  | 0.0998 | 0.4125 | -0.1747 | 0.0902 | 0.0939 | 11.8853 | 0.1564 | 300.8113 |
| CardioEmbolicStroke | s_unclassified_Oribacterium_sp._oral_taxon_078      | MR Egger                  | 9  | -0.5853 | 0.6772 | 0.4160 | 0.1642  | 0.1728 | 0.3735 | 6.4734  | 0.4857 | 200.6377 |
| CardioEmbolicStroke | s_unclassified_Oribacterium_sp._oral_taxon_078      | Weighted median           | 9  | -0.0510 | 0.1335 | 0.7023 | 0.1642  | 0.1728 | 0.3735 | 6.4734  | 0.4857 | 200.6377 |
| CardioEmbolicStroke | s_unclassified_Oribacterium_sp._oral_taxon_078      | Inverse variance weighted | 9  | 0.0508  | 0.1035 | 0.6235 | 0.1642  | 0.1728 | 0.3735 | 6.4734  | 0.4857 | 200.6377 |
| CardioEmbolicStroke | s_unclassified_Oribacterium_sp._oral_taxon_078      | Simple mode               | 9  | -0.0446 | 0.2107 | 0.8376 | 0.1642  | 0.1728 | 0.3735 | 6.4734  | 0.4857 | 200.6377 |
| CardioEmbolicStroke | s_unclassified_Oribacterium_sp._oral_taxon_078      | Weighted mode             | 9  | -0.0523 | 0.1906 | 0.7906 | 0.1642  | 0.1728 | 0.3735 | 6.4734  | 0.4857 | 200.6377 |
| CardioEmbolicStroke | s_unclassified_Oribacterium_sp._oral_taxon_108      | MR Egger                  | 9  | -0.3436 | 0.6724 | 0.6251 | 0.0617  | 0.1716 | 0.7297 | 2.2674  | 0.9436 | 385.8267 |
| CardioEmbolicStroke | s_unclassified_Oribacterium_sp._oral_taxon_108      | Weighted median           | 9  | -0.1320 | 0.1324 | 0.3188 | 0.0617  | 0.1716 | 0.7297 | 2.2674  | 0.9436 | 385.8267 |
| CardioEmbolicStroke | s_unclassified_Oribacterium_sp._oral_taxon_108      | Inverse variance weighted | 9  | -0.1045 | 0.1028 | 0.3093 | 0.0617  | 0.1716 | 0.7297 | 2.2674  | 0.9436 | 385.8267 |
| CardioEmbolicStroke | s_unclassified_Oribacterium_sp._oral_taxon_108      | Simple mode               | 9  | -0.1873 | 0.1963 | 0.3678 | 0.0617  | 0.1716 | 0.7297 | 2.2674  | 0.9436 | 385.8267 |
| CardioEmbolicStroke | s_unclassified_Oribacterium_sp._oral_taxon_108      | Weighted mode             | 9  | -0.1982 | 0.1775 | 0.2964 | 0.0617  | 0.1716 | 0.7297 | 2.2674  | 0.9436 | 385.8267 |
| CardioEmbolicStroke | s_unclassified_Peptoniphilus_sp._oral_taxon_386     | MR Egger                  | 9  | 0.4829  | 0.7264 | 0.5274 | -0.1533 | 0.1853 | 0.4355 | 8.1568  | 0.3190 | 144.3723 |
| CardioEmbolicStroke | s_unclassified_Peptoniphilus_sp._oral_taxon_386     | Weighted median           | 9  | -0.0826 | 0.1418 | 0.5600 | -0.1533 | 0.1853 | 0.4355 | 8.1568  | 0.3190 | 144.3723 |
| CardioEmbolicStroke | s_unclassified_Peptoniphilus_sp._oral_taxon_386     | Inverse variance weighted | 9  | -0.1108 | 0.1088 | 0.3086 | -0.1533 | 0.1853 | 0.4355 | 8.1568  | 0.3190 | 144.3723 |
| CardioEmbolicStroke | s_unclassified_Peptoniphilus_sp._oral_taxon_386     | Simple mode               | 9  | -0.0647 | 0.2404 | 0.7946 | -0.1533 | 0.1853 | 0.4355 | 8.1568  | 0.3190 | 144.3723 |
| CardioEmbolicStroke | s_unclassified_Peptoniphilus_sp._oral_taxon_386     | Weighted mode             | 9  | -0.0602 | 0.1960 | 0.7665 | -0.1533 | 0.1853 | 0.4355 | 8.1568  | 0.3190 | 144.3723 |
| CardioEmbolicStroke | s_unclassified_Prevotella_sp._oral_taxon_472        | MR Egger                  | 9  | 0.6364  | 0.6742 | 0.3766 | -0.1407 | 0.1720 | 0.4404 | 6.3135  | 0.5037 | 169.0435 |
| CardioEmbolicStroke | s_unclassified_Prevotella_sp._oral_taxon_472        | Weighted median           | 9  | 0.2143  | 0.1382 | 0.1208 | -0.1407 | 0.1720 | 0.4404 | 6.3135  | 0.5037 | 169.0435 |
| CardioEmbolicStroke | s_unclassified_Prevotella_sp._oral_taxon_472        | Inverse variance weighted | 9  | 0.0914  | 0.1030 | 0.3747 | -0.1407 | 0.1720 | 0.4404 | 6.3135  | 0.5037 | 169.0435 |
| CardioEmbolicStroke | s_unclassified_Prevotella_sp._oral_taxon_472        | Simple mode               | 9  | 0.2206  | 0.2247 | 0.3550 | -0.1407 | 0.1720 | 0.4404 | 6.3135  | 0.5037 | 169.0435 |
| CardioEmbolicStroke | s_unclassified_Prevotella_sp._oral_taxon_472        | Weighted mode             | 9  | 0.2274  | 0.1812 | 0.2450 | -0.1407 | 0.1720 | 0.4404 | 6.3135  | 0.5037 | 169.0435 |
| CardioEmbolicStroke | s_unclassified_Ruminococcaceae_bacterium_D16        | MR Egger                  | 9  | 0.2489  | 0.3421 | 0.4904 | -0.0690 | 0.0873 | 0.4550 | 10.0342 | 0.1866 | 519.0688 |
| CardioEmbolicStroke | s_unclassified_Ruminococcaceae_bacterium_D16        | Weighted median           | 9  | 0.0000  | 0.0606 | 0.9999 | -0.0690 | 0.0873 | 0.4550 | 10.0342 | 0.1866 | 519.0688 |
| CardioEmbolicStroke | s_unclassified_Ruminococcaceae_bacterium_D16        | Inverse variance weighted | 9  | -0.0184 | 0.0510 | 0.7181 | -0.0690 | 0.0873 | 0.4550 | 10.0342 | 0.1866 | 519.0688 |
| CardioEmbolicStroke | s_unclassified_Ruminococcaceae_bacterium_D16        | Simple mode               | 9  | -0.0101 | 0.0922 | 0.9158 | -0.0690 | 0.0873 | 0.4550 | 10.0342 | 0.1866 | 519.0688 |
| CardioEmbolicStroke | s_unclassified_Ruminococcaceae_bacterium_D16        | Weighted mode             | 9  | 0.0339  | 0.0758 | 0.6671 | -0.0690 | 0.0873 | 0.4550 | 10.0342 | 0.1866 | 519.0688 |
| CardioEmbolicStroke | s_unclassified_Ruminococcus_sp._5_1_39BFAA          | MR Egger                  | 9  | 0.6294  | 0.4461 | 0.2011 | -0.1681 | 0.1138 | 0.1831 | 15.5475 | 0.0493 | 293.9711 |
| CardioEmbolicStroke | s_unclassified_Ruminococcus_sp._5_1_39BFAA          | Weighted median           | 9  | 0.0112  | 0.0768 | 0.8838 | -0.1681 | 0.1138 | 0.1831 | 15.5475 | 0.0493 | 293.9711 |
| CardioEmbolicStroke | s_unclassified_Ruminococcus_sp._5_1_39BFAA          | Inverse variance weighted | 9  | -0.0218 | 0.0730 | 0.7652 | -0.1681 | 0.1138 | 0.1831 | 15.5475 | 0.0493 | 293.9711 |
| CardioEmbolicStroke | s_unclassified_Ruminococcus_sp._5_1_39BFAA          | Simple mode               | 9  | 0.0256  | 0.1326 | 0.8515 | -0.1681 | 0.1138 | 0.1831 | 15.5475 | 0.0493 | 293.9711 |
| CardioEmbolicStroke | s_unclassified_Ruminococcus_sp._5_1_39BFAA          | Weighted mode             | 9  | 0.0567  | 0.1231 | 0.6572 | -0.1681 | 0.1138 | 0.1831 | 15.5475 | 0.0493 | 293.9711 |
| CardioEmbolicStroke | s_unclassified_Streptococcus_sp._C150               | MR Egger                  | 9  | 0.2048  | 0.4739 | 0.6786 | -0.0583 | 0.1209 | 0.6444 | 5.1635  | 0.6400 | 381.1314 |
| CardioEmbolicStroke | s_unclassified_Streptococcus_sp._C150               | Weighted median           | 9  | -0.0004 | 0.0919 | 0.9968 | -0.0583 | 0.1209 | 0.6444 | 5.1635  | 0.6400 | 381.1314 |
| CardioEmbolicStroke | s_unclassified_Streptococcus_sp._C150               | Inverse variance weighted | 9  | -0.0210 | 0.0724 | 0.7721 | -0.0583 | 0.1209 | 0.6444 | 5.1635  | 0.6400 | 381.1314 |
| CardioEmbolicStroke | s_unclassified_Streptococcus_sp._C150               | Simple mode               | 9  | 0.0687  | 0.1575 | 0.6743 | -0.0583 | 0.1209 | 0.6444 | 5.1635  | 0.6400 | 381.1314 |
| CardioEmbolicStroke | s_unclassified_Streptococcus_sp._C150               | Weighted mode             | 9  | 0.1033  | 0.1496 | 0.5092 | -0.0583 | 0.1209 | 0.6444 | 5.1635  | 0.6400 | 381.1314 |
| CardioEmbolicStroke | s_unclassified_Streptococcus_sp._M143               | MR Egger                  | 9  | -0.2820 | 0.6708 | 0.6868 | 0.0288  | 0.1711 | 0.8713 | 5.2076  | 0.6346 | 138.1293 |
| CardioEmbolicStroke | s_unclassified_Streptococcus_sp._M143               | Weighted median           | 9  | -0.1941 | 0.1322 | 0.1420 | 0.0288  | 0.1711 | 0.8713 | 5.2076  | 0.6346 | 138.1293 |
| CardioEmbolicStroke | s_unclassified_Streptococcus_sp._M143               | Inverse variance weighted | 9  | -0.1706 | 0.1024 | 0.0958 | 0.0288  | 0.1711 | 0.8713 | 5.2076  | 0.6346 | 138.1293 |
| CardioEmbolicStroke | s_unclassified_Streptococcus_sp._M143               | Simple mode               | 9  | -0.3656 | 0.2084 | 0.1174 | 0.0288  | 0.1711 | 0.8713 | 5.2076  | 0.6346 | 138.1293 |
| CardioEmbolicStroke | s_unclassified_Streptococcus_sp._M143               | Weighted mode             | 9  | -0.3433 | 0.2063 | 0.1346 | 0.0288  | 0.1711 | 0.8713 | 5.2076  | 0.6346 | 138.1293 |
| CardioEmbolicStroke | s_unclassified_Streptococcus_sp._oral_taxon_071     | MR Egger                  | 9  | 0.0452  | 0.3872 | 0.9104 | -0.0197 | 0.0988 | 0.8477 | 4.1550  | 0.7618 | 625.3278 |
| CardioEmbolicStroke | s_unclassified_Streptococcus_sp._oral_taxon_071     | Weighted median           | 9  | -0.0431 | 0.0787 | 0.5839 | -0.0197 | 0.0988 | 0.8477 | 4.1550  | 0.7618 | 625.3278 |
| CardioEmbolicStroke | s_unclassified_Streptococcus_sp._oral_taxon_071     | Inverse variance weighted | 9  | -0.0311 | 0.0592 | 0.5990 | -0.0197 | 0.0988 | 0.8477 | 4.1550  | 0.7618 | 625.3278 |
| CardioEmbolicStroke | s_unclassified_Streptococcus_sp._oral_taxon_071     | Simple mode               | 9  | -0.0816 | 0.1182 | 0.5092 | -0.0197 | 0.0988 | 0.8477 | 4.1550  | 0.7618 | 625.3278 |
| CardioEmbolicStroke | s_unclassified_Streptococcus_sp._oral_taxon_071     | Weighted mode             | 9  | -0.0816 | 0.1149 | 0.4975 | -0.0197 | 0.0988 | 0.8477 | 4.1550  | 0.7618 | 625.3278 |
| CardioEmbolicStroke | s_unclassified_Veillonella_sp._oral_taxon_158       | MR Egger                  | 9  | 0.8996  | 0.5508 | 0.1464 | -0.2022 | 0.1405 | 0.1933 | 6.7884  | 0.5596 | 154.1300 |
| CardioEmbolicStroke | s_unclassified_Veillonella_sp._oral_taxon_158       | Weighted median           | 9  | 0.0764  | 0.1114 | 0.4928 | -0.2022 | 0.1405 | 0.1933 | 6.7884  | 0.5596 | 154.1300 |
| CardioEmbolicStroke | s_unclassified_Veillonella_sp._oral_taxon_158       | Inverse variance weighted | 9  | 0.1164  | 0.0842 | 0.1669 | -0.2022 | 0.1405 | 0.1933 | 6.7884  | 0.5596 | 154.1300 |
| CardioEmbolicStroke | s_unclassified_Veillonella_sp._oral_taxon_158       | Simple mode               | 9  | 0.1152  | 0.1803 | 0.5408 | -0.2022 | 0.1405 | 0.1933 | 6.7884  | 0.5596 | 154.1300 |
| CardioEmbolicStroke | s_unclassified_Veillonella_sp._oral_taxon_158       | Weighted mode             | 9  | 0.1119  | 0.1665 | 0.5205 | -0.2022 | 0.1405 | 0.1933 | 6.7884  | 0.5596 | 154.1300 |
| IschemicStroke      | MF0001                                              | MR Egger                  | 31 | 0.0339  | 0.0825 | 0.6846 | 0.0005  | 0.0059 | 0.9322 | 27.0803 | 0.5674 | 112.2988 |
| IschemicStroke      | MF0001                                              | Weighted median           | 31 | 0.0320  | 0.0459 | 0.4865 | 0.0005  | 0.0059 | 0.9322 | 27.0803 | 0.5674 | 112.2988 |
| IschemicStroke      | MF0001                                              | Inverse variance weighted | 31 | 0.0404  | 0.0307 | 0.1873 | 0.0005  | 0.0059 | 0.9322 | 27.0803 | 0.5674 | 112.2988 |

|                |        |                           |    |         |        |        |         |        |        |         |        |          |
|----------------|--------|---------------------------|----|---------|--------|--------|---------|--------|--------|---------|--------|----------|
| IschemicStroke | MF0001 | Simple mode               | 31 | 0.1338  | 0.0848 | 0.1249 | 0.0005  | 0.0059 | 0.9322 | 27.0803 | 0.5674 | 112.2988 |
| IschemicStroke | MF0001 | Weighted mode             | 31 | 0.0327  | 0.0644 | 0.6154 | 0.0005  | 0.0059 | 0.9322 | 27.0803 | 0.5674 | 112.2988 |
| IschemicStroke | MF0002 | MR Egger                  | 31 | 0.2594  | 0.1379 | 0.0699 | -0.0154 | 0.0099 | 0.1295 | 29.9300 | 0.4692 | 52.8458  |
| IschemicStroke | MF0002 | Weighted median           | 31 | 0.1433  | 0.0749 | 0.0559 | -0.0154 | 0.0099 | 0.1295 | 29.9300 | 0.4692 | 52.8458  |
| IschemicStroke | MF0002 | Inverse variance weighted | 31 | 0.0597  | 0.0512 | 0.2440 | -0.0154 | 0.0099 | 0.1295 | 29.9300 | 0.4692 | 52.8458  |
| IschemicStroke | MF0002 | Simple mode               | 31 | 0.2379  | 0.1624 | 0.1533 | -0.0154 | 0.0099 | 0.1295 | 29.9300 | 0.4692 | 52.8458  |
| IschemicStroke | MF0002 | Weighted mode             | 31 | 0.2339  | 0.1268 | 0.0749 | -0.0154 | 0.0099 | 0.1295 | 29.9300 | 0.4692 | 52.8458  |
| IschemicStroke | MF0003 | MR Egger                  | 31 | 0.0815  | 0.0985 | 0.4151 | -0.0009 | 0.0071 | 0.9027 | 35.4922 | 0.1888 | 66.1585  |
| IschemicStroke | MF0003 | Weighted median           | 31 | 0.0880  | 0.0502 | 0.0798 | -0.0009 | 0.0071 | 0.9027 | 35.4922 | 0.1888 | 66.1585  |
| IschemicStroke | MF0003 | Inverse variance weighted | 31 | 0.0702  | 0.0360 | 0.0512 | -0.0009 | 0.0071 | 0.9027 | 35.4922 | 0.1888 | 66.1585  |
| IschemicStroke | MF0003 | Simple mode               | 31 | 0.1159  | 0.1015 | 0.2623 | -0.0009 | 0.0071 | 0.9027 | 35.4922 | 0.1888 | 66.1585  |
| IschemicStroke | MF0003 | Weighted mode             | 31 | 0.1303  | 0.0836 | 0.1293 | -0.0009 | 0.0071 | 0.9027 | 35.4922 | 0.1888 | 66.1585  |
| IschemicStroke | MF0004 | MR Egger                  | 31 | 0.0714  | 0.0696 | 0.3133 | -0.0011 | 0.0050 | 0.8253 | 19.5742 | 0.9057 | 90.8335  |
| IschemicStroke | MF0004 | Weighted median           | 31 | 0.0840  | 0.0385 | 0.0293 | -0.0011 | 0.0050 | 0.8253 | 19.5742 | 0.9057 | 90.8335  |
| IschemicStroke | MF0004 | Inverse variance weighted | 31 | 0.0570  | 0.0259 | 0.0275 | -0.0011 | 0.0050 | 0.8253 | 19.5742 | 0.9057 | 90.8335  |
| IschemicStroke | MF0004 | Simple mode               | 31 | 0.1307  | 0.0784 | 0.1059 | -0.0011 | 0.0050 | 0.8253 | 19.5742 | 0.9057 | 90.8335  |
| IschemicStroke | MF0004 | Weighted mode             | 31 | 0.1091  | 0.0654 | 0.1058 | -0.0011 | 0.0050 | 0.8253 | 19.5742 | 0.9057 | 90.8335  |
| IschemicStroke | MF0005 | MR Egger                  | 31 | 0.0523  | 0.1129 | 0.6464 | -0.0062 | 0.0081 | 0.4475 | 31.3728 | 0.3481 | 63.4639  |
| IschemicStroke | MF0005 | Weighted median           | 31 | -0.0414 | 0.0600 | 0.4899 | -0.0062 | 0.0081 | 0.4475 | 31.3728 | 0.3481 | 63.4639  |
| IschemicStroke | MF0005 | Inverse variance weighted | 31 | -0.0284 | 0.0416 | 0.4958 | -0.0062 | 0.0081 | 0.4475 | 31.3728 | 0.3481 | 63.4639  |
| IschemicStroke | MF0005 | Simple mode               | 31 | -0.0661 | 0.1080 | 0.5453 | -0.0062 | 0.0081 | 0.4475 | 31.3728 | 0.3481 | 63.4639  |
| IschemicStroke | MF0005 | Weighted mode             | 31 | -0.0458 | 0.0929 | 0.6260 | -0.0062 | 0.0081 | 0.4475 | 31.3728 | 0.3481 | 63.4639  |
| IschemicStroke | MF0006 | MR Egger                  | 31 | -0.0076 | 0.0620 | 0.9035 | 0.0019  | 0.0044 | 0.6712 | 27.4988 | 0.5448 | 146.6700 |
| IschemicStroke | MF0006 | Weighted median           | 31 | 0.0168  | 0.0339 | 0.6203 | 0.0019  | 0.0044 | 0.6712 | 27.4988 | 0.5448 | 146.6700 |
| IschemicStroke | MF0006 | Inverse variance weighted | 31 | 0.0171  | 0.0230 | 0.4577 | 0.0019  | 0.0044 | 0.6712 | 27.4988 | 0.5448 | 146.6700 |
| IschemicStroke | MF0006 | Simple mode               | 31 | -0.0143 | 0.0595 | 0.8117 | 0.0019  | 0.0044 | 0.6712 | 27.4988 | 0.5448 | 146.6700 |
| IschemicStroke | MF0006 | Weighted mode             | 31 | 0.0002  | 0.0486 | 0.9964 | 0.0019  | 0.0044 | 0.6712 | 27.4988 | 0.5448 | 146.6700 |
| IschemicStroke | MF0007 | MR Egger                  | 31 | -0.1652 | 0.2369 | 0.4913 | 0.0113  | 0.0170 | 0.5095 | 39.9082 | 0.0854 | 13.6736  |
| IschemicStroke | MF0007 | Weighted median           | 31 | 0.0298  | 0.1084 | 0.7831 | 0.0113  | 0.0170 | 0.5095 | 39.9082 | 0.0854 | 13.6736  |
| IschemicStroke | MF0007 | Inverse variance weighted | 31 | -0.0183 | 0.0872 | 0.8342 | 0.0113  | 0.0170 | 0.5095 | 39.9082 | 0.0854 | 13.6736  |
| IschemicStroke | MF0007 | Simple mode               | 31 | 0.1119  | 0.2079 | 0.5945 | 0.0113  | 0.0170 | 0.5095 | 39.9082 | 0.0854 | 13.6736  |
| IschemicStroke | MF0007 | Weighted mode             | 31 | 0.0338  | 0.1673 | 0.8411 | 0.0113  | 0.0170 | 0.5095 | 39.9082 | 0.0854 | 13.6736  |
| IschemicStroke | MF0008 | MR Egger                  | 31 | -0.0438 | 0.0377 | 0.2550 | 0.0051  | 0.0027 | 0.0700 | 27.5797 | 0.5927 | 154.9307 |
| IschemicStroke | MF0008 | Weighted median           | 31 | 0.0043  | 0.0211 | 0.8402 | 0.0051  | 0.0027 | 0.0700 | 27.5797 | 0.5927 | 154.9307 |
| IschemicStroke | MF0008 | Inverse variance weighted | 31 | 0.0220  | 0.0140 | 0.1154 | 0.0051  | 0.0027 | 0.0700 | 27.5797 | 0.5927 | 154.9307 |
| IschemicStroke | MF0008 | Simple mode               | 31 | -0.0038 | 0.0401 | 0.9257 | 0.0051  | 0.0027 | 0.0700 | 27.5797 | 0.5927 | 154.9307 |
| IschemicStroke | MF0008 | Weighted mode             | 31 | -0.0167 | 0.0285 | 0.5629 | 0.0051  | 0.0027 | 0.0700 | 27.5797 | 0.5927 | 154.9307 |
| IschemicStroke | MF0009 | MR Egger                  | 31 | 0.0306  | 0.0804 | 0.7059 | -0.0039 | 0.0058 | 0.5001 | 44.6545 | 0.0318 | 115.6878 |
| IschemicStroke | MF0009 | Weighted median           | 31 | -0.0220 | 0.0376 | 0.5588 | -0.0039 | 0.0058 | 0.5001 | 44.6545 | 0.0318 | 115.6878 |
| IschemicStroke | MF0009 | Inverse variance weighted | 31 | -0.0203 | 0.0296 | 0.4921 | -0.0039 | 0.0058 | 0.5001 | 44.6545 | 0.0318 | 115.6878 |
| IschemicStroke | MF0009 | Simple mode               | 31 | -0.0344 | 0.0744 | 0.6475 | -0.0039 | 0.0058 | 0.5001 | 44.6545 | 0.0318 | 115.6878 |
| IschemicStroke | MF0009 | Weighted mode             | 31 | -0.0027 | 0.0563 | 0.9616 | -0.0039 | 0.0058 | 0.5001 | 44.6545 | 0.0318 | 115.6878 |
| IschemicStroke | MF0010 | MR Egger                  | 31 | 0.0310  | 0.0398 | 0.4426 | -0.0014 | 0.0029 | 0.6281 | 34.9375 | 0.2066 | 219.5327 |
| IschemicStroke | MF0010 | Weighted median           | 31 | 0.0180  | 0.0198 | 0.3632 | -0.0014 | 0.0029 | 0.6281 | 34.9375 | 0.2066 | 219.5327 |
| IschemicStroke | MF0010 | Inverse variance weighted | 31 | 0.0129  | 0.0146 | 0.3772 | -0.0014 | 0.0029 | 0.6281 | 34.9375 | 0.2066 | 219.5327 |
| IschemicStroke | MF0010 | Simple mode               | 31 | 0.0048  | 0.0422 | 0.9105 | -0.0014 | 0.0029 | 0.6281 | 34.9375 | 0.2066 | 219.5327 |
| IschemicStroke | MF0010 | Weighted mode             | 31 | 0.0274  | 0.0310 | 0.3839 | -0.0014 | 0.0029 | 0.6281 | 34.9375 | 0.2066 | 219.5327 |
| IschemicStroke | MF0011 | MR Egger                  | 31 | 0.0986  | 0.1440 | 0.4988 | -0.0100 | 0.0103 | 0.3412 | 23.3521 | 0.8005 | 40.0893  |
| IschemicStroke | MF0011 | Weighted median           | 31 | 0.0258  | 0.0782 | 0.7415 | -0.0100 | 0.0103 | 0.3412 | 23.3521 | 0.8005 | 40.0893  |
| IschemicStroke | MF0011 | Inverse variance weighted | 31 | -0.0307 | 0.0535 | 0.5659 | -0.0100 | 0.0103 | 0.3412 | 23.3521 | 0.8005 | 40.0893  |
| IschemicStroke | MF0011 | Simple mode               | 31 | 0.0327  | 0.1472 | 0.8259 | -0.0100 | 0.0103 | 0.3412 | 23.3521 | 0.8005 | 40.0893  |
| IschemicStroke | MF0011 | Weighted mode             | 31 | 0.0810  | 0.1024 | 0.4352 | -0.0100 | 0.0103 | 0.3412 | 23.3521 | 0.8005 | 40.0893  |
| IschemicStroke | MF0012 | MR Egger                  | 31 | 0.0214  | 0.2544 | 0.9335 | -0.0008 | 0.0182 | 0.9632 | 36.1942 | 0.1680 | 15.9056  |
| IschemicStroke | MF0012 | Weighted median           | 31 | 0.0566  | 0.1274 | 0.6566 | -0.0008 | 0.0182 | 0.9632 | 36.1942 | 0.1680 | 15.9056  |
| IschemicStroke | MF0012 | Inverse variance weighted | 31 | 0.0104  | 0.0929 | 0.9107 | -0.0008 | 0.0182 | 0.9632 | 36.1942 | 0.1680 | 15.9056  |
| IschemicStroke | MF0012 | Simple mode               | 31 | 0.0799  | 0.2012 | 0.6941 | -0.0008 | 0.0182 | 0.9632 | 36.1942 | 0.1680 | 15.9056  |
| IschemicStroke | MF0012 | Weighted mode             | 31 | 0.0660  | 0.1516 | 0.6664 | -0.0008 | 0.0182 | 0.9632 | 36.1942 | 0.1680 | 15.9056  |
| IschemicStroke | MF0013 | MR Egger                  | 31 | -0.0041 | 0.0336 | 0.9031 | -0.0013 | 0.0024 | 0.5998 | 24.4140 | 0.7083 | 369.6214 |
| IschemicStroke | MF0013 | Weighted median           | 31 | -0.0172 | 0.0178 | 0.3328 | -0.0013 | 0.0024 | 0.5998 | 24.4140 | 0.7083 | 369.6214 |
| IschemicStroke | MF0013 | Inverse variance weighted | 31 | -0.0207 | 0.0125 | 0.0977 | -0.0013 | 0.0024 | 0.5998 | 24.4140 | 0.7083 | 369.6214 |
| IschemicStroke | MF0013 | Simple mode               | 31 | -0.0293 | 0.0339 | 0.3936 | -0.0013 | 0.0024 | 0.5998 | 24.4140 | 0.7083 | 369.6214 |

|                |        |                           |    |         |        |        |         |        |        |         |        |          |
|----------------|--------|---------------------------|----|---------|--------|--------|---------|--------|--------|---------|--------|----------|
| IschemicStroke | MF0013 | Weighted mode             | 31 | -0.0208 | 0.0261 | 0.4314 | -0.0013 | 0.0024 | 0.5998 | 24.4140 | 0.7083 | 369.6214 |
| IschemicStroke | MF0014 | MR Egger                  | 31 | 0.0549  | 0.0941 | 0.5639 | -0.0025 | 0.0067 | 0.7088 | 44.4917 | 0.0329 | 102.6509 |
| IschemicStroke | MF0014 | Weighted median           | 31 | 0.0377  | 0.0462 | 0.4144 | -0.0025 | 0.0067 | 0.7088 | 44.4917 | 0.0329 | 102.6509 |
| IschemicStroke | MF0014 | Inverse variance weighted | 31 | 0.0220  | 0.0345 | 0.5235 | -0.0025 | 0.0067 | 0.7088 | 44.4917 | 0.0329 | 102.6509 |
| IschemicStroke | MF0014 | Simple mode               | 31 | 0.0281  | 0.0792 | 0.7255 | -0.0025 | 0.0067 | 0.7088 | 44.4917 | 0.0329 | 102.6509 |
| IschemicStroke | MF0014 | Weighted mode             | 31 | 0.0407  | 0.0540 | 0.4570 | -0.0025 | 0.0067 | 0.7088 | 44.4917 | 0.0329 | 102.6509 |
| IschemicStroke | MF0015 | MR Egger                  | 31 | 0.0718  | 0.1529 | 0.6423 | -0.0057 | 0.0110 | 0.6093 | 20.8039 | 0.8662 | 53.5965  |
| IschemicStroke | MF0015 | Weighted median           | 31 | 0.0198  | 0.0818 | 0.8084 | -0.0057 | 0.0110 | 0.6093 | 20.8039 | 0.8662 | 53.5965  |
| IschemicStroke | MF0015 | Inverse variance weighted | 31 | -0.0016 | 0.0568 | 0.9780 | -0.0057 | 0.0110 | 0.6093 | 20.8039 | 0.8662 | 53.5965  |
| IschemicStroke | MF0015 | Simple mode               | 31 | 0.0967  | 0.1470 | 0.5157 | -0.0057 | 0.0110 | 0.6093 | 20.8039 | 0.8662 | 53.5965  |
| IschemicStroke | MF0015 | Weighted mode             | 31 | 0.1199  | 0.1313 | 0.3685 | -0.0057 | 0.0110 | 0.6093 | 20.8039 | 0.8662 | 53.5965  |
| IschemicStroke | MF0016 | MR Egger                  | 31 | -0.0915 | 0.1261 | 0.4741 | 0.0064  | 0.0090 | 0.4828 | 19.2482 | 0.9148 | 55.9032  |
| IschemicStroke | MF0016 | Weighted median           | 31 | -0.0055 | 0.0679 | 0.9356 | 0.0064  | 0.0090 | 0.4828 | 19.2482 | 0.9148 | 55.9032  |
| IschemicStroke | MF0016 | Inverse variance weighted | 31 | -0.0082 | 0.0469 | 0.8607 | 0.0064  | 0.0090 | 0.4828 | 19.2482 | 0.9148 | 55.9032  |
| IschemicStroke | MF0016 | Simple mode               | 31 | -0.0118 | 0.1130 | 0.9174 | 0.0064  | 0.0090 | 0.4828 | 19.2482 | 0.9148 | 55.9032  |
| IschemicStroke | MF0016 | Weighted mode             | 31 | -0.0366 | 0.0940 | 0.6996 | 0.0064  | 0.0090 | 0.4828 | 19.2482 | 0.9148 | 55.9032  |
| IschemicStroke | MF0017 | MR Egger                  | 31 | -0.0369 | 0.0376 | 0.3345 | 0.0041  | 0.0027 | 0.1428 | 22.1866 | 0.8472 | 201.7712 |
| IschemicStroke | MF0017 | Weighted median           | 31 | -0.0014 | 0.0205 | 0.9441 | 0.0041  | 0.0027 | 0.1428 | 22.1866 | 0.8472 | 201.7712 |
| IschemicStroke | MF0017 | Inverse variance weighted | 31 | 0.0157  | 0.0140 | 0.2615 | 0.0041  | 0.0027 | 0.1428 | 22.1866 | 0.8472 | 201.7712 |
| IschemicStroke | MF0017 | Simple mode               | 31 | 0.0254  | 0.0353 | 0.4772 | 0.0041  | 0.0027 | 0.1428 | 22.1866 | 0.8472 | 201.7712 |
| IschemicStroke | MF0017 | Weighted mode             | 31 | -0.0094 | 0.0280 | 0.7397 | 0.0041  | 0.0027 | 0.1428 | 22.1866 | 0.8472 | 201.7712 |
| IschemicStroke | MF0018 | MR Egger                  | 31 | -0.0292 | 0.0423 | 0.4961 | 0.0015  | 0.0030 | 0.6145 | 26.2724 | 0.6109 | 224.3640 |
| IschemicStroke | MF0018 | Weighted median           | 31 | -0.0066 | 0.0231 | 0.7758 | 0.0015  | 0.0030 | 0.6145 | 26.2724 | 0.6109 | 224.3640 |
| IschemicStroke | MF0018 | Inverse variance weighted | 31 | -0.0092 | 0.0157 | 0.5599 | 0.0015  | 0.0030 | 0.6145 | 26.2724 | 0.6109 | 224.3640 |
| IschemicStroke | MF0018 | Simple mode               | 31 | -0.0039 | 0.0428 | 0.9287 | 0.0015  | 0.0030 | 0.6145 | 26.2724 | 0.6109 | 224.3640 |
| IschemicStroke | MF0018 | Weighted mode             | 31 | -0.0086 | 0.0347 | 0.8054 | 0.0015  | 0.0030 | 0.6145 | 26.2724 | 0.6109 | 224.3640 |
| IschemicStroke | MF0019 | MR Egger                  | 31 | -0.0680 | 0.1155 | 0.5607 | 0.0065  | 0.0083 | 0.4395 | 44.4180 | 0.0335 | 51.6730  |
| IschemicStroke | MF0019 | Weighted median           | 31 | 0.0401  | 0.0533 | 0.4520 | 0.0065  | 0.0083 | 0.4395 | 44.4180 | 0.0335 | 51.6730  |
| IschemicStroke | MF0019 | Inverse variance weighted | 31 | 0.0161  | 0.0426 | 0.7063 | 0.0065  | 0.0083 | 0.4395 | 44.4180 | 0.0335 | 51.6730  |
| IschemicStroke | MF0019 | Simple mode               | 31 | 0.0551  | 0.0856 | 0.5248 | 0.0065  | 0.0083 | 0.4395 | 44.4180 | 0.0335 | 51.6730  |
| IschemicStroke | MF0019 | Weighted mode             | 31 | 0.0410  | 0.0696 | 0.5601 | 0.0065  | 0.0083 | 0.4395 | 44.4180 | 0.0335 | 51.6730  |
| IschemicStroke | MF0020 | MR Egger                  | 31 | -0.0591 | 0.1460 | 0.6885 | 0.0045  | 0.0105 | 0.6668 | 30.1653 | 0.4058 | 39.1291  |
| IschemicStroke | MF0020 | Weighted median           | 31 | 0.0234  | 0.0762 | 0.7587 | 0.0045  | 0.0105 | 0.6668 | 30.1653 | 0.4058 | 39.1291  |
| IschemicStroke | MF0020 | Inverse variance weighted | 31 | -0.0002 | 0.0535 | 0.9977 | 0.0045  | 0.0105 | 0.6668 | 30.1653 | 0.4058 | 39.1291  |
| IschemicStroke | MF0020 | Simple mode               | 31 | 0.0059  | 0.1355 | 0.9656 | 0.0045  | 0.0105 | 0.6668 | 30.1653 | 0.4058 | 39.1291  |
| IschemicStroke | MF0020 | Weighted mode             | 31 | 0.0101  | 0.1111 | 0.9283 | 0.0045  | 0.0105 | 0.6668 | 30.1653 | 0.4058 | 39.1291  |
| IschemicStroke | MF0021 | MR Egger                  | 31 | 0.0411  | 0.0617 | 0.5111 | -0.0008 | 0.0044 | 0.8555 | 32.0218 | 0.3189 | 169.3759 |
| IschemicStroke | MF0021 | Weighted median           | 31 | 0.0294  | 0.0322 | 0.3600 | -0.0008 | 0.0044 | 0.8555 | 32.0218 | 0.3189 | 169.3759 |
| IschemicStroke | MF0021 | Inverse variance weighted | 31 | 0.0305  | 0.0226 | 0.1759 | -0.0008 | 0.0044 | 0.8555 | 32.0218 | 0.3189 | 169.3759 |
| IschemicStroke | MF0021 | Simple mode               | 31 | 0.0250  | 0.0574 | 0.6656 | -0.0008 | 0.0044 | 0.8555 | 32.0218 | 0.3189 | 169.3759 |
| IschemicStroke | MF0021 | Weighted mode             | 31 | 0.0313  | 0.0464 | 0.5059 | -0.0008 | 0.0044 | 0.8555 | 32.0218 | 0.3189 | 169.3759 |
| IschemicStroke | MF0022 | MR Egger                  | 31 | -0.0013 | 0.0552 | 0.9819 | 0.0017  | 0.0040 | 0.6660 | 22.9119 | 0.7806 | 197.6772 |
| IschemicStroke | MF0022 | Weighted median           | 31 | 0.0140  | 0.0293 | 0.6323 | 0.0017  | 0.0040 | 0.6660 | 22.9119 | 0.7806 | 197.6772 |
| IschemicStroke | MF0022 | Inverse variance weighted | 31 | 0.0211  | 0.0205 | 0.3038 | 0.0017  | 0.0040 | 0.6660 | 22.9119 | 0.7806 | 197.6772 |
| IschemicStroke | MF0022 | Simple mode               | 31 | -0.0268 | 0.0508 | 0.6012 | 0.0017  | 0.0040 | 0.6660 | 22.9119 | 0.7806 | 197.6772 |
| IschemicStroke | MF0022 | Weighted mode             | 31 | 0.0067  | 0.0407 | 0.8700 | 0.0017  | 0.0040 | 0.6660 | 22.9119 | 0.7806 | 197.6772 |
| IschemicStroke | MF0024 | MR Egger                  | 31 | -0.0306 | 0.4882 | 0.9505 | -0.0141 | 0.0350 | 0.6899 | 23.6096 | 0.7479 | 1.1673   |
| IschemicStroke | MF0024 | Weighted median           | 31 | -0.0564 | 0.2721 | 0.8359 | -0.0141 | 0.0350 | 0.6899 | 23.6096 | 0.7479 | 1.1673   |
| IschemicStroke | MF0024 | Inverse variance weighted | 31 | -0.2132 | 0.1814 | 0.2398 | -0.0141 | 0.0350 | 0.6899 | 23.6096 | 0.7479 | 1.1673   |
| IschemicStroke | MF0024 | Simple mode               | 31 | 0.0334  | 0.5060 | 0.9478 | -0.0141 | 0.0350 | 0.6899 | 23.6096 | 0.7479 | 1.1673   |
| IschemicStroke | MF0024 | Weighted mode             | 31 | -0.0428 | 0.3773 | 0.9104 | -0.0141 | 0.0350 | 0.6899 | 23.6096 | 0.7479 | 1.1673   |
| IschemicStroke | MF0025 | MR Egger                  | 31 | -0.0532 | 0.2355 | 0.8228 | 0.0090  | 0.0169 | 0.5986 | 21.9067 | 0.8240 | 27.6749  |
| IschemicStroke | MF0025 | Weighted median           | 31 | -0.0460 | 0.1281 | 0.7194 | 0.0090  | 0.0169 | 0.5986 | 21.9067 | 0.8240 | 27.6749  |
| IschemicStroke | MF0025 | Inverse variance weighted | 31 | 0.0632  | 0.0875 | 0.4704 | 0.0090  | 0.0169 | 0.5986 | 21.9067 | 0.8240 | 27.6749  |
| IschemicStroke | MF0025 | Simple mode               | 31 | 0.0090  | 0.2244 | 0.9683 | 0.0090  | 0.0169 | 0.5986 | 21.9067 | 0.8240 | 27.6749  |
| IschemicStroke | MF0025 | Weighted mode             | 31 | -0.0266 | 0.1848 | 0.8865 | 0.0090  | 0.0169 | 0.5986 | 21.9067 | 0.8240 | 27.6749  |
| IschemicStroke | MF0026 | MR Egger                  | 31 | -0.0081 | 0.0415 | 0.8461 | 0.0010  | 0.0030 | 0.7326 | 23.8170 | 0.7379 | 269.3188 |
| IschemicStroke | MF0026 | Weighted median           | 31 | -0.0168 | 0.0234 | 0.4725 | 0.0010  | 0.0030 | 0.7326 | 23.8170 | 0.7379 | 269.3188 |
| IschemicStroke | MF0026 | Inverse variance weighted | 31 | 0.0052  | 0.0154 | 0.7376 | 0.0010  | 0.0030 | 0.7326 | 23.8170 | 0.7379 | 269.3188 |
| IschemicStroke | MF0026 | Simple mode               | 31 | -0.0217 | 0.0442 | 0.6278 | 0.0010  | 0.0030 | 0.7326 | 23.8170 | 0.7379 | 269.3188 |
| IschemicStroke | MF0026 | Weighted mode             | 31 | -0.0227 | 0.0324 | 0.4887 | 0.0010  | 0.0030 | 0.7326 | 23.8170 | 0.7379 | 269.3188 |

|                |        |                           |    |         |        |        |         |        |        |         |        |          |
|----------------|--------|---------------------------|----|---------|--------|--------|---------|--------|--------|---------|--------|----------|
| IschemicStroke | MF0027 | MR Egger                  | 31 | 0.0336  | 0.3397 | 0.9218 | -0.0135 | 0.0243 | 0.5833 | 36.1774 | 0.1685 | 3.5818   |
| IschemicStroke | MF0027 | Weighted median           | 31 | -0.1449 | 0.1677 | 0.3875 | -0.0135 | 0.0243 | 0.5833 | 36.1774 | 0.1685 | 3.5818   |
| IschemicStroke | MF0027 | Inverse variance weighted | 31 | -0.1413 | 0.1248 | 0.2573 | -0.0135 | 0.0243 | 0.5833 | 36.1774 | 0.1685 | 3.5818   |
| IschemicStroke | MF0027 | Simple mode               | 31 | -0.0566 | 0.3208 | 0.8611 | -0.0135 | 0.0243 | 0.5833 | 36.1774 | 0.1685 | 3.5818   |
| IschemicStroke | MF0027 | Weighted mode             | 31 | -0.1965 | 0.2396 | 0.4186 | -0.0135 | 0.0243 | 0.5833 | 36.1774 | 0.1685 | 3.5818   |
| IschemicStroke | MF0028 | MR Egger                  | 31 | -0.0798 | 0.0628 | 0.2142 | 0.0073  | 0.0045 | 0.1161 | 26.8475 | 0.6313 | 151.1516 |
| IschemicStroke | MF0028 | Weighted median           | 31 | 0.0238  | 0.0371 | 0.5216 | 0.0073  | 0.0045 | 0.1161 | 26.8475 | 0.6313 | 151.1516 |
| IschemicStroke | MF0028 | Inverse variance weighted | 31 | 0.0147  | 0.0233 | 0.5290 | 0.0073  | 0.0045 | 0.1161 | 26.8475 | 0.6313 | 151.1516 |
| IschemicStroke | MF0028 | Simple mode               | 31 | 0.0743  | 0.0781 | 0.3489 | 0.0073  | 0.0045 | 0.1161 | 26.8475 | 0.6313 | 151.1516 |
| IschemicStroke | MF0028 | Weighted mode             | 31 | 0.0414  | 0.0746 | 0.5829 | 0.0073  | 0.0045 | 0.1161 | 26.8475 | 0.6313 | 151.1516 |
| IschemicStroke | MF0029 | MR Egger                  | 31 | -0.0107 | 0.1123 | 0.9245 | 0.0002  | 0.0080 | 0.9841 | 28.1680 | 0.5089 | 78.7114  |
| IschemicStroke | MF0029 | Weighted median           | 31 | -0.0018 | 0.0623 | 0.9768 | 0.0002  | 0.0080 | 0.9841 | 28.1680 | 0.5089 | 78.7114  |
| IschemicStroke | MF0029 | Inverse variance weighted | 31 | -0.0086 | 0.0417 | 0.8360 | 0.0002  | 0.0080 | 0.9841 | 28.1680 | 0.5089 | 78.7114  |
| IschemicStroke | MF0029 | Simple mode               | 31 | -0.1237 | 0.1148 | 0.2897 | 0.0002  | 0.0080 | 0.9841 | 28.1680 | 0.5089 | 78.7114  |
| IschemicStroke | MF0029 | Weighted mode             | 31 | -0.0191 | 0.0917 | 0.8368 | 0.0002  | 0.0080 | 0.9841 | 28.1680 | 0.5089 | 78.7114  |
| IschemicStroke | MF0030 | MR Egger                  | 31 | -0.0252 | 0.1779 | 0.8881 | -0.0053 | 0.0127 | 0.6831 | 26.7944 | 0.5828 | 29.1802  |
| IschemicStroke | MF0030 | Weighted median           | 31 | -0.0278 | 0.0973 | 0.7752 | -0.0053 | 0.0127 | 0.6831 | 26.7944 | 0.5828 | 29.1802  |
| IschemicStroke | MF0030 | Inverse variance weighted | 31 | -0.0934 | 0.0661 | 0.1578 | -0.0053 | 0.0127 | 0.6831 | 26.7944 | 0.5828 | 29.1802  |
| IschemicStroke | MF0030 | Simple mode               | 31 | -0.1172 | 0.2024 | 0.5670 | -0.0053 | 0.0127 | 0.6831 | 26.7944 | 0.5828 | 29.1802  |
| IschemicStroke | MF0030 | Weighted mode             | 31 | -0.0147 | 0.1484 | 0.9217 | -0.0053 | 0.0127 | 0.6831 | 26.7944 | 0.5828 | 29.1802  |
| IschemicStroke | MF0031 | MR Egger                  | 31 | 0.0320  | 0.2497 | 0.8990 | 0.0052  | 0.0179 | 0.7717 | 26.1931 | 0.6152 | 19.4465  |
| IschemicStroke | MF0031 | Weighted median           | 31 | 0.0712  | 0.1365 | 0.6021 | 0.0052  | 0.0179 | 0.7717 | 26.1931 | 0.6152 | 19.4465  |
| IschemicStroke | MF0031 | Inverse variance weighted | 31 | 0.0999  | 0.0928 | 0.2818 | 0.0052  | 0.0179 | 0.7717 | 26.1931 | 0.6152 | 19.4465  |
| IschemicStroke | MF0031 | Simple mode               | 31 | 0.0448  | 0.2471 | 0.8574 | 0.0052  | 0.0179 | 0.7717 | 26.1931 | 0.6152 | 19.4465  |
| IschemicStroke | MF0031 | Weighted mode             | 31 | 0.0506  | 0.1978 | 0.8000 | 0.0052  | 0.0179 | 0.7717 | 26.1931 | 0.6152 | 19.4465  |
| IschemicStroke | MF0032 | MR Egger                  | 31 | -0.1827 | 0.4212 | 0.6676 | 0.0092  | 0.0302 | 0.7630 | 23.8059 | 0.7384 | 2.6579   |
| IschemicStroke | MF0032 | Weighted median           | 31 | -0.1365 | 0.2202 | 0.5353 | 0.0092  | 0.0302 | 0.7630 | 23.8059 | 0.7384 | 2.6579   |
| IschemicStroke | MF0032 | Inverse variance weighted | 31 | -0.0637 | 0.1565 | 0.6838 | 0.0092  | 0.0302 | 0.7630 | 23.8059 | 0.7384 | 2.6579   |
| IschemicStroke | MF0032 | Simple mode               | 31 | 0.1464  | 0.4371 | 0.7400 | 0.0092  | 0.0302 | 0.7630 | 23.8059 | 0.7384 | 2.6579   |
| IschemicStroke | MF0032 | Weighted mode             | 31 | -0.1420 | 0.3731 | 0.7063 | 0.0092  | 0.0302 | 0.7630 | 23.8059 | 0.7384 | 2.6579   |
| IschemicStroke | MF0033 | MR Egger                  | 31 | -0.0296 | 0.0435 | 0.5015 | 0.0023  | 0.0031 | 0.4724 | 35.8507 | 0.1780 | 208.9548 |
| IschemicStroke | MF0033 | Weighted median           | 31 | -0.0185 | 0.0212 | 0.3843 | 0.0023  | 0.0031 | 0.4724 | 35.8507 | 0.1780 | 208.9548 |
| IschemicStroke | MF0033 | Inverse variance weighted | 31 | -0.0002 | 0.0160 | 0.9899 | 0.0023  | 0.0031 | 0.4724 | 35.8507 | 0.1780 | 208.9548 |
| IschemicStroke | MF0033 | Simple mode               | 31 | -0.0302 | 0.0372 | 0.4226 | 0.0023  | 0.0031 | 0.4724 | 35.8507 | 0.1780 | 208.9548 |
| IschemicStroke | MF0033 | Weighted mode             | 31 | -0.0150 | 0.0289 | 0.6086 | 0.0023  | 0.0031 | 0.4724 | 35.8507 | 0.1780 | 208.9548 |
| IschemicStroke | MF0034 | MR Egger                  | 31 | 0.0550  | 0.1186 | 0.6464 | -0.0026 | 0.0085 | 0.7657 | 23.7290 | 0.7422 | 47.1825  |
| IschemicStroke | MF0034 | Weighted median           | 31 | 0.0181  | 0.0646 | 0.7786 | -0.0026 | 0.0085 | 0.7657 | 23.7290 | 0.7422 | 47.1825  |
| IschemicStroke | MF0034 | Inverse variance weighted | 31 | 0.0218  | 0.0440 | 0.6201 | -0.0026 | 0.0085 | 0.7657 | 23.7290 | 0.7422 | 47.1825  |
| IschemicStroke | MF0034 | Simple mode               | 31 | 0.0036  | 0.1176 | 0.9758 | -0.0026 | 0.0085 | 0.7657 | 23.7290 | 0.7422 | 47.1825  |
| IschemicStroke | MF0034 | Weighted mode             | 31 | 0.0002  | 0.0950 | 0.9986 | -0.0026 | 0.0085 | 0.7657 | 23.7290 | 0.7422 | 47.1825  |
| IschemicStroke | MF0035 | MR Egger                  | 31 | -0.1015 | 0.1589 | 0.5279 | 0.0117  | 0.0114 | 0.3117 | 27.9920 | 0.5709 | 49.8321  |
| IschemicStroke | MF0035 | Weighted median           | 31 | 0.0253  | 0.0852 | 0.7665 | 0.0117  | 0.0114 | 0.3117 | 27.9920 | 0.5709 | 49.8321  |
| IschemicStroke | MF0035 | Inverse variance weighted | 31 | 0.0504  | 0.0590 | 0.3934 | 0.0117  | 0.0114 | 0.3117 | 27.9920 | 0.5709 | 49.8321  |
| IschemicStroke | MF0035 | Simple mode               | 31 | 0.0651  | 0.1531 | 0.6737 | 0.0117  | 0.0114 | 0.3117 | 27.9920 | 0.5709 | 49.8321  |
| IschemicStroke | MF0035 | Weighted mode             | 31 | -0.0086 | 0.1325 | 0.9486 | 0.0117  | 0.0114 | 0.3117 | 27.9920 | 0.5709 | 49.8321  |
| IschemicStroke | MF0036 | MR Egger                  | 31 | 0.0402  | 0.1113 | 0.7208 | -0.0019 | 0.0080 | 0.8092 | 25.0860 | 0.6738 | 79.8337  |
| IschemicStroke | MF0036 | Weighted median           | 31 | 0.0462  | 0.0613 | 0.4507 | -0.0019 | 0.0080 | 0.8092 | 25.0860 | 0.6738 | 79.8337  |
| IschemicStroke | MF0036 | Inverse variance weighted | 31 | 0.0150  | 0.0414 | 0.7169 | -0.0019 | 0.0080 | 0.8092 | 25.0860 | 0.6738 | 79.8337  |
| IschemicStroke | MF0036 | Simple mode               | 31 | -0.0267 | 0.1090 | 0.8085 | -0.0019 | 0.0080 | 0.8092 | 25.0860 | 0.6738 | 79.8337  |
| IschemicStroke | MF0036 | Weighted mode             | 31 | 0.0147  | 0.0953 | 0.8786 | -0.0019 | 0.0080 | 0.8092 | 25.0860 | 0.6738 | 79.8337  |
| IschemicStroke | MF0037 | MR Egger                  | 31 | 0.0286  | 0.2118 | 0.8934 | 0.0044  | 0.0152 | 0.7755 | 34.8381 | 0.2099 | 25.1970  |
| IschemicStroke | MF0037 | Weighted median           | 31 | 0.0654  | 0.1015 | 0.5190 | 0.0044  | 0.0152 | 0.7755 | 34.8381 | 0.2099 | 25.1970  |
| IschemicStroke | MF0037 | Inverse variance weighted | 31 | 0.0852  | 0.0775 | 0.2713 | 0.0044  | 0.0152 | 0.7755 | 34.8381 | 0.2099 | 25.1970  |
| IschemicStroke | MF0037 | Simple mode               | 31 | 0.0725  | 0.1777 | 0.6862 | 0.0044  | 0.0152 | 0.7755 | 34.8381 | 0.2099 | 25.1970  |
| IschemicStroke | MF0037 | Weighted mode             | 31 | 0.0725  | 0.1457 | 0.6225 | 0.0044  | 0.0152 | 0.7755 | 34.8381 | 0.2099 | 25.1970  |
| IschemicStroke | MF0038 | MR Egger                  | 31 | -0.0486 | 0.0525 | 0.3630 | 0.0038  | 0.0038 | 0.3179 | 21.5261 | 0.8707 | 187.9285 |
| IschemicStroke | MF0038 | Weighted median           | 31 | 0.0040  | 0.0285 | 0.8875 | 0.0038  | 0.0038 | 0.3179 | 21.5261 | 0.8707 | 187.9285 |
| IschemicStroke | MF0038 | Inverse variance weighted | 31 | 0.0010  | 0.0195 | 0.9585 | 0.0038  | 0.0038 | 0.3179 | 21.5261 | 0.8707 | 187.9285 |
| IschemicStroke | MF0038 | Simple mode               | 31 | 0.0376  | 0.0504 | 0.4614 | 0.0038  | 0.0038 | 0.3179 | 21.5261 | 0.8707 | 187.9285 |
| IschemicStroke | MF0038 | Weighted mode             | 31 | 0.0172  | 0.0400 | 0.6697 | 0.0038  | 0.0038 | 0.3179 | 21.5261 | 0.8707 | 187.9285 |
| IschemicStroke | MF0039 | MR Egger                  | 31 | 0.3014  | 0.2981 | 0.3203 | -0.0262 | 0.0213 | 0.2290 | 40.3053 | 0.0991 | 5.2079   |

|                |        |                           |    |         |        |        |         |        |        |         |        |          |
|----------------|--------|---------------------------|----|---------|--------|--------|---------|--------|--------|---------|--------|----------|
| IschemicStroke | MF0039 | Weighted median           | 31 | 0.1355  | 0.1500 | 0.3663 | -0.0262 | 0.0213 | 0.2290 | 40.3053 | 0.0991 | 5.2079   |
| IschemicStroke | MF0039 | Inverse variance weighted | 31 | -0.0387 | 0.1117 | 0.7292 | -0.0262 | 0.0213 | 0.2290 | 40.3053 | 0.0991 | 5.2079   |
| IschemicStroke | MF0039 | Simple mode               | 31 | 0.1883  | 0.2427 | 0.4440 | -0.0262 | 0.0213 | 0.2290 | 40.3053 | 0.0991 | 5.2079   |
| IschemicStroke | MF0039 | Weighted mode             | 31 | 0.2138  | 0.1784 | 0.2402 | -0.0262 | 0.0213 | 0.2290 | 40.3053 | 0.0991 | 5.2079   |
| IschemicStroke | MF0040 | MR Egger                  | 31 | -0.0118 | 0.2709 | 0.9656 | 0.0022  | 0.0194 | 0.9123 | 29.6248 | 0.4329 | 14.4366  |
| IschemicStroke | MF0040 | Weighted median           | 31 | 0.0670  | 0.1510 | 0.6573 | 0.0022  | 0.0194 | 0.9123 | 29.6248 | 0.4329 | 14.4366  |
| IschemicStroke | MF0040 | Inverse variance weighted | 31 | 0.0162  | 0.0996 | 0.8712 | 0.0022  | 0.0194 | 0.9123 | 29.6248 | 0.4329 | 14.4366  |
| IschemicStroke | MF0040 | Simple mode               | 31 | 0.1474  | 0.3035 | 0.6307 | 0.0022  | 0.0194 | 0.9123 | 29.6248 | 0.4329 | 14.4366  |
| IschemicStroke | MF0040 | Weighted mode             | 31 | 0.0720  | 0.2238 | 0.7501 | 0.0022  | 0.0194 | 0.9123 | 29.6248 | 0.4329 | 14.4366  |
| IschemicStroke | MF0041 | MR Egger                  | 31 | 0.0583  | 0.1346 | 0.6682 | -0.0019 | 0.0096 | 0.8487 | 27.9777 | 0.5191 | 51.0501  |
| IschemicStroke | MF0041 | Weighted median           | 31 | -0.0012 | 0.0735 | 0.9872 | -0.0019 | 0.0096 | 0.8487 | 27.9777 | 0.5191 | 51.0501  |
| IschemicStroke | MF0041 | Inverse variance weighted | 31 | 0.0342  | 0.0500 | 0.4936 | -0.0019 | 0.0096 | 0.8487 | 27.9777 | 0.5191 | 51.0501  |
| IschemicStroke | MF0041 | Simple mode               | 31 | -0.0327 | 0.1400 | 0.8171 | -0.0019 | 0.0096 | 0.8487 | 27.9777 | 0.5191 | 51.0501  |
| IschemicStroke | MF0041 | Weighted mode             | 31 | 0.0091  | 0.1045 | 0.9313 | -0.0019 | 0.0096 | 0.8487 | 27.9777 | 0.5191 | 51.0501  |
| IschemicStroke | MF0043 | MR Egger                  | 31 | 0.0848  | 0.1486 | 0.5726 | -0.0074 | 0.0106 | 0.4904 | 21.9251 | 0.8233 | 54.4120  |
| IschemicStroke | MF0043 | Weighted median           | 31 | 0.0589  | 0.0791 | 0.4560 | -0.0074 | 0.0106 | 0.4904 | 21.9251 | 0.8233 | 54.4120  |
| IschemicStroke | MF0043 | Inverse variance weighted | 31 | -0.0116 | 0.0552 | 0.8341 | -0.0074 | 0.0106 | 0.4904 | 21.9251 | 0.8233 | 54.4120  |
| IschemicStroke | MF0043 | Simple mode               | 31 | 0.0438  | 0.1590 | 0.7847 | -0.0074 | 0.0106 | 0.4904 | 21.9251 | 0.8233 | 54.4120  |
| IschemicStroke | MF0043 | Weighted mode             | 31 | 0.0937  | 0.1143 | 0.4186 | -0.0074 | 0.0106 | 0.4904 | 21.9251 | 0.8233 | 54.4120  |
| IschemicStroke | MF0044 | MR Egger                  | 31 | -0.0027 | 0.0441 | 0.9513 | 0.0008  | 0.0032 | 0.7984 | 29.8262 | 0.4227 | 233.2848 |
| IschemicStroke | MF0044 | Weighted median           | 31 | 0.0103  | 0.0230 | 0.6551 | 0.0008  | 0.0032 | 0.7984 | 29.8262 | 0.4227 | 233.2848 |
| IschemicStroke | MF0044 | Inverse variance weighted | 31 | 0.0078  | 0.0162 | 0.6275 | 0.0008  | 0.0032 | 0.7984 | 29.8262 | 0.4227 | 233.2848 |
| IschemicStroke | MF0044 | Simple mode               | 31 | -0.0030 | 0.0404 | 0.9422 | 0.0008  | 0.0032 | 0.7984 | 29.8262 | 0.4227 | 233.2848 |
| IschemicStroke | MF0044 | Weighted mode             | 31 | -0.0082 | 0.0324 | 0.8010 | 0.0008  | 0.0032 | 0.7984 | 29.8262 | 0.4227 | 233.2848 |
| IschemicStroke | MF0045 | MR Egger                  | 31 | -0.0738 | 0.0572 | 0.2068 | 0.0058  | 0.0041 | 0.1668 | 20.2790 | 0.9091 | 217.9339 |
| IschemicStroke | MF0045 | Weighted median           | 31 | 0.0015  | 0.0305 | 0.9610 | 0.0058  | 0.0041 | 0.1668 | 20.2790 | 0.9091 | 217.9339 |
| IschemicStroke | MF0045 | Inverse variance weighted | 31 | 0.0014  | 0.0212 | 0.9458 | 0.0058  | 0.0041 | 0.1668 | 20.2790 | 0.9091 | 217.9339 |
| IschemicStroke | MF0045 | Simple mode               | 31 | 0.0043  | 0.0641 | 0.9465 | 0.0058  | 0.0041 | 0.1668 | 20.2790 | 0.9091 | 217.9339 |
| IschemicStroke | MF0045 | Weighted mode             | 31 | -0.0010 | 0.0575 | 0.9859 | 0.0058  | 0.0041 | 0.1668 | 20.2790 | 0.9091 | 217.9339 |
| IschemicStroke | MF0046 | MR Egger                  | 31 | 0.0342  | 0.2172 | 0.8759 | -0.0013 | 0.0156 | 0.9332 | 31.4166 | 0.3461 | 22.3276  |
| IschemicStroke | MF0046 | Weighted median           | 31 | 0.0049  | 0.1150 | 0.9659 | -0.0013 | 0.0156 | 0.9332 | 31.4166 | 0.3461 | 22.3276  |
| IschemicStroke | MF0046 | Inverse variance weighted | 31 | 0.0172  | 0.0794 | 0.8287 | -0.0013 | 0.0156 | 0.9332 | 31.4166 | 0.3461 | 22.3276  |
| IschemicStroke | MF0046 | Simple mode               | 31 | -0.0095 | 0.2095 | 0.9642 | -0.0013 | 0.0156 | 0.9332 | 31.4166 | 0.3461 | 22.3276  |
| IschemicStroke | MF0046 | Weighted mode             | 31 | -0.0154 | 0.1621 | 0.9250 | -0.0013 | 0.0156 | 0.9332 | 31.4166 | 0.3461 | 22.3276  |
| IschemicStroke | MF0047 | MR Egger                  | 31 | -0.0309 | 0.0643 | 0.6347 | 0.0032  | 0.0046 | 0.4982 | 29.1298 | 0.4583 | 173.8714 |
| IschemicStroke | MF0047 | Weighted median           | 31 | -0.0004 | 0.0355 | 0.9900 | 0.0032  | 0.0046 | 0.4982 | 29.1298 | 0.4583 | 173.8714 |
| IschemicStroke | MF0047 | Inverse variance weighted | 31 | 0.0101  | 0.0238 | 0.6726 | 0.0032  | 0.0046 | 0.4982 | 29.1298 | 0.4583 | 173.8714 |
| IschemicStroke | MF0047 | Simple mode               | 31 | 0.0092  | 0.0638 | 0.8867 | 0.0032  | 0.0046 | 0.4982 | 29.1298 | 0.4583 | 173.8714 |
| IschemicStroke | MF0047 | Weighted mode             | 31 | 0.0000  | 0.0466 | 0.9999 | 0.0032  | 0.0046 | 0.4982 | 29.1298 | 0.4583 | 173.8714 |
| IschemicStroke | MF0048 | MR Egger                  | 31 | -0.0214 | 0.0423 | 0.6159 | 0.0011  | 0.0030 | 0.7240 | 27.9900 | 0.5184 | 222.2464 |
| IschemicStroke | MF0048 | Weighted median           | 31 | -0.0158 | 0.0231 | 0.4930 | 0.0011  | 0.0030 | 0.7240 | 27.9900 | 0.5184 | 222.2464 |
| IschemicStroke | MF0048 | Inverse variance weighted | 31 | -0.0074 | 0.0157 | 0.6356 | 0.0011  | 0.0030 | 0.7240 | 27.9900 | 0.5184 | 222.2464 |
| IschemicStroke | MF0048 | Simple mode               | 31 | -0.0163 | 0.0376 | 0.6670 | 0.0011  | 0.0030 | 0.7240 | 27.9900 | 0.5184 | 222.2464 |
| IschemicStroke | MF0048 | Weighted mode             | 31 | -0.0163 | 0.0313 | 0.6051 | 0.0011  | 0.0030 | 0.7240 | 27.9900 | 0.5184 | 222.2464 |
| IschemicStroke | MF0049 | MR Egger                  | 31 | 0.0345  | 0.0455 | 0.4549 | -0.0029 | 0.0033 | 0.3773 | 21.0188 | 0.8585 | 244.7659 |
| IschemicStroke | MF0049 | Weighted median           | 31 | 0.0079  | 0.0243 | 0.7439 | -0.0029 | 0.0033 | 0.3773 | 21.0188 | 0.8585 | 244.7659 |
| IschemicStroke | MF0049 | Inverse variance weighted | 31 | -0.0034 | 0.0169 | 0.8400 | -0.0029 | 0.0033 | 0.3773 | 21.0188 | 0.8585 | 244.7659 |
| IschemicStroke | MF0049 | Simple mode               | 31 | -0.0108 | 0.0446 | 0.8111 | -0.0029 | 0.0033 | 0.3773 | 21.0188 | 0.8585 | 244.7659 |
| IschemicStroke | MF0049 | Weighted mode             | 31 | 0.0176  | 0.0359 | 0.6266 | -0.0029 | 0.0033 | 0.3773 | 21.0188 | 0.8585 | 244.7659 |
| IschemicStroke | MF0050 | MR Egger                  | 31 | 0.0033  | 0.0597 | 0.9565 | -0.0020 | 0.0043 | 0.6399 | 30.3707 | 0.3957 | 118.6582 |
| IschemicStroke | MF0050 | Weighted median           | 31 | 0.0123  | 0.0327 | 0.7073 | -0.0020 | 0.0043 | 0.6399 | 30.3707 | 0.3957 | 118.6582 |
| IschemicStroke | MF0050 | Inverse variance weighted | 31 | -0.0229 | 0.0219 | 0.2950 | -0.0020 | 0.0043 | 0.6399 | 30.3707 | 0.3957 | 118.6582 |
| IschemicStroke | MF0050 | Simple mode               | 31 | 0.0298  | 0.0571 | 0.6058 | -0.0020 | 0.0043 | 0.6399 | 30.3707 | 0.3957 | 118.6582 |
| IschemicStroke | MF0050 | Weighted mode             | 31 | 0.0262  | 0.0408 | 0.5255 | -0.0020 | 0.0043 | 0.6399 | 30.3707 | 0.3957 | 118.6582 |
| IschemicStroke | MF0051 | MR Egger                  | 31 | -0.0760 | 0.0557 | 0.1829 | 0.0065  | 0.0040 | 0.1113 | 25.7651 | 0.6871 | 161.0420 |
| IschemicStroke | MF0051 | Weighted median           | 31 | -0.0245 | 0.0293 | 0.4018 | 0.0065  | 0.0040 | 0.1113 | 25.7651 | 0.6871 | 161.0420 |
| IschemicStroke | MF0051 | Inverse variance weighted | 31 | 0.0089  | 0.0207 | 0.6660 | 0.0065  | 0.0040 | 0.1113 | 25.7651 | 0.6871 | 161.0420 |
| IschemicStroke | MF0051 | Simple mode               | 31 | 0.0472  | 0.0661 | 0.4808 | 0.0065  | 0.0040 | 0.1113 | 25.7651 | 0.6871 | 161.0420 |
| IschemicStroke | MF0051 | Weighted mode             | 31 | -0.0695 | 0.0487 | 0.1640 | 0.0065  | 0.0040 | 0.1113 | 25.7651 | 0.6871 | 161.0420 |
| IschemicStroke | MF0052 | MR Egger                  | 31 | -0.2827 | 0.5636 | 0.6197 | 0.0154  | 0.0404 | 0.7063 | 37.3952 | 0.1364 | 3.2600   |
| IschemicStroke | MF0052 | Weighted median           | 31 | 0.0527  | 0.2913 | 0.8564 | 0.0154  | 0.0404 | 0.7063 | 37.3952 | 0.1364 | 3.2600   |

|                |        |                           |    |         |        |        |         |        |        |         |        |          |
|----------------|--------|---------------------------|----|---------|--------|--------|---------|--------|--------|---------|--------|----------|
| IschemicStroke | MF0052 | Inverse variance weighted | 31 | -0.0836 | 0.2064 | 0.6853 | 0.0154  | 0.0404 | 0.7063 | 37.3952 | 0.1364 | 3.2600   |
| IschemicStroke | MF0052 | Simple mode               | 31 | 0.1504  | 0.5432 | 0.7838 | 0.0154  | 0.0404 | 0.7063 | 37.3952 | 0.1364 | 3.2600   |
| IschemicStroke | MF0052 | Weighted mode             | 31 | 0.0450  | 0.4242 | 0.9163 | 0.0154  | 0.0404 | 0.7063 | 37.3952 | 0.1364 | 3.2600   |
| IschemicStroke | MF0054 | MR Egger                  | 31 | 0.0113  | 0.0587 | 0.8482 | -0.0016 | 0.0042 | 0.7083 | 31.4692 | 0.3436 | 176.2722 |
| IschemicStroke | MF0054 | Weighted median           | 31 | -0.0035 | 0.0316 | 0.9121 | -0.0016 | 0.0042 | 0.7083 | 31.4692 | 0.3436 | 176.2722 |
| IschemicStroke | MF0054 | Inverse variance weighted | 31 | -0.0093 | 0.0215 | 0.6669 | -0.0016 | 0.0042 | 0.7083 | 31.4692 | 0.3436 | 176.2722 |
| IschemicStroke | MF0054 | Simple mode               | 31 | -0.0090 | 0.0595 | 0.8814 | -0.0016 | 0.0042 | 0.7083 | 31.4692 | 0.3436 | 176.2722 |
| IschemicStroke | MF0054 | Weighted mode             | 31 | 0.0055  | 0.0432 | 0.8991 | -0.0016 | 0.0042 | 0.7083 | 31.4692 | 0.3436 | 176.2722 |
| IschemicStroke | MF0055 | MR Egger                  | 31 | 0.0497  | 0.1662 | 0.7669 | -0.0046 | 0.0119 | 0.6995 | 36.8014 | 0.1514 | 37.2279  |
| IschemicStroke | MF0055 | Weighted median           | 31 | 0.0040  | 0.0850 | 0.9625 | -0.0046 | 0.0119 | 0.6995 | 36.8014 | 0.1514 | 37.2279  |
| IschemicStroke | MF0055 | Inverse variance weighted | 31 | -0.0104 | 0.0609 | 0.8639 | -0.0046 | 0.0119 | 0.6995 | 36.8014 | 0.1514 | 37.2279  |
| IschemicStroke | MF0055 | Simple mode               | 31 | -0.0642 | 0.1633 | 0.6968 | -0.0046 | 0.0119 | 0.6995 | 36.8014 | 0.1514 | 37.2279  |
| IschemicStroke | MF0055 | Weighted mode             | 31 | 0.0203  | 0.1199 | 0.8669 | -0.0046 | 0.0119 | 0.6995 | 36.8014 | 0.1514 | 37.2279  |
| IschemicStroke | MF0056 | MR Egger                  | 31 | 0.0659  | 0.1858 | 0.7254 | -0.0032 | 0.0133 | 0.8102 | 28.3616 | 0.4986 | 31.2008  |
| IschemicStroke | MF0056 | Weighted median           | 31 | 0.0080  | 0.1013 | 0.9368 | -0.0032 | 0.0133 | 0.8102 | 28.3616 | 0.4986 | 31.2008  |
| IschemicStroke | MF0056 | Inverse variance weighted | 31 | 0.0241  | 0.0690 | 0.7271 | -0.0032 | 0.0133 | 0.8102 | 28.3616 | 0.4986 | 31.2008  |
| IschemicStroke | MF0056 | Simple mode               | 31 | 0.0530  | 0.1878 | 0.7795 | -0.0032 | 0.0133 | 0.8102 | 28.3616 | 0.4986 | 31.2008  |
| IschemicStroke | MF0056 | Weighted mode             | 31 | 0.0144  | 0.1524 | 0.9256 | -0.0032 | 0.0133 | 0.8102 | 28.3616 | 0.4986 | 31.2008  |
| IschemicStroke | MF0057 | MR Egger                  | 31 | 0.3463  | 0.2500 | 0.1766 | -0.0163 | 0.0179 | 0.3709 | 22.1678 | 0.8132 | 11.4759  |
| IschemicStroke | MF0057 | Weighted median           | 31 | 0.0863  | 0.1360 | 0.5258 | -0.0163 | 0.0179 | 0.3709 | 22.1678 | 0.8132 | 11.4759  |
| IschemicStroke | MF0057 | Inverse variance weighted | 31 | 0.1354  | 0.0929 | 0.1452 | -0.0163 | 0.0179 | 0.3709 | 22.1678 | 0.8132 | 11.4759  |
| IschemicStroke | MF0057 | Simple mode               | 31 | 0.0890  | 0.2977 | 0.7671 | -0.0163 | 0.0179 | 0.3709 | 22.1678 | 0.8132 | 11.4759  |
| IschemicStroke | MF0057 | Weighted mode             | 31 | -0.0092 | 0.2858 | 0.9745 | -0.0163 | 0.0179 | 0.3709 | 22.1678 | 0.8132 | 11.4759  |
| IschemicStroke | MF0058 | MR Egger                  | 31 | 0.1668  | 0.1506 | 0.2770 | -0.0123 | 0.0108 | 0.2620 | 29.8761 | 0.4720 | 47.1496  |
| IschemicStroke | MF0058 | Weighted median           | 31 | -0.0265 | 0.0847 | 0.7544 | -0.0123 | 0.0108 | 0.2620 | 29.8761 | 0.4720 | 47.1496  |
| IschemicStroke | MF0058 | Inverse variance weighted | 31 | 0.0069  | 0.0560 | 0.9019 | -0.0123 | 0.0108 | 0.2620 | 29.8761 | 0.4720 | 47.1496  |
| IschemicStroke | MF0058 | Simple mode               | 31 | -0.1148 | 0.1715 | 0.5086 | -0.0123 | 0.0108 | 0.2620 | 29.8761 | 0.4720 | 47.1496  |
| IschemicStroke | MF0058 | Weighted mode             | 31 | -0.0672 | 0.1466 | 0.6498 | -0.0123 | 0.0108 | 0.2620 | 29.8761 | 0.4720 | 47.1496  |
| IschemicStroke | MF0059 | MR Egger                  | 31 | -0.0687 | 0.3750 | 0.8560 | -0.0006 | 0.0269 | 0.9824 | 36.9068 | 0.1486 | 2.8827   |
| IschemicStroke | MF0059 | Weighted median           | 31 | 0.0580  | 0.1852 | 0.7542 | -0.0006 | 0.0269 | 0.9824 | 36.9068 | 0.1486 | 2.8827   |
| IschemicStroke | MF0059 | Inverse variance weighted | 31 | -0.0764 | 0.1370 | 0.5769 | -0.0006 | 0.0269 | 0.9824 | 36.9068 | 0.1486 | 2.8827   |
| IschemicStroke | MF0059 | Simple mode               | 31 | 0.2949  | 0.3602 | 0.4194 | -0.0006 | 0.0269 | 0.9824 | 36.9068 | 0.1486 | 2.8827   |
| IschemicStroke | MF0059 | Weighted mode             | 31 | 0.1865  | 0.2903 | 0.5256 | -0.0006 | 0.0269 | 0.9824 | 36.9068 | 0.1486 | 2.8827   |
| IschemicStroke | MF0060 | MR Egger                  | 31 | 0.0863  | 0.1556 | 0.5836 | -0.0047 | 0.0111 | 0.6764 | 24.3999 | 0.7090 | 30.3444  |
| IschemicStroke | MF0060 | Weighted median           | 31 | 0.1070  | 0.0832 | 0.1987 | -0.0047 | 0.0111 | 0.6764 | 24.3999 | 0.7090 | 30.3444  |
| IschemicStroke | MF0060 | Inverse variance weighted | 31 | 0.0253  | 0.0578 | 0.6613 | -0.0047 | 0.0111 | 0.6764 | 24.3999 | 0.7090 | 30.3444  |
| IschemicStroke | MF0060 | Simple mode               | 31 | 0.1929  | 0.1628 | 0.2454 | -0.0047 | 0.0111 | 0.6764 | 24.3999 | 0.7090 | 30.3444  |
| IschemicStroke | MF0060 | Weighted mode             | 31 | 0.1802  | 0.1286 | 0.1714 | -0.0047 | 0.0111 | 0.6764 | 24.3999 | 0.7090 | 30.3444  |
| IschemicStroke | MF0061 | MR Egger                  | 31 | 0.1195  | 0.1343 | 0.3810 | -0.0088 | 0.0096 | 0.3683 | 36.0513 | 0.1721 | 49.4662  |
| IschemicStroke | MF0061 | Weighted median           | 31 | 0.0259  | 0.0667 | 0.6977 | -0.0088 | 0.0096 | 0.3683 | 36.0513 | 0.1721 | 49.4662  |
| IschemicStroke | MF0061 | Inverse variance weighted | 31 | 0.0055  | 0.0498 | 0.9117 | -0.0088 | 0.0096 | 0.3683 | 36.0513 | 0.1721 | 49.4662  |
| IschemicStroke | MF0061 | Simple mode               | 31 | 0.0589  | 0.1350 | 0.6658 | -0.0088 | 0.0096 | 0.3683 | 36.0513 | 0.1721 | 49.4662  |
| IschemicStroke | MF0061 | Weighted mode             | 31 | 0.0970  | 0.1124 | 0.3949 | -0.0088 | 0.0096 | 0.3683 | 36.0513 | 0.1721 | 49.4662  |
| IschemicStroke | MF0062 | MR Egger                  | 31 | 0.1881  | 0.2482 | 0.4545 | -0.0055 | 0.0178 | 0.7573 | 33.3829 | 0.2626 | 17.9509  |
| IschemicStroke | MF0062 | Weighted median           | 31 | 0.2204  | 0.1356 | 0.1041 | -0.0055 | 0.0178 | 0.7573 | 33.3829 | 0.2626 | 17.9509  |
| IschemicStroke | MF0062 | Inverse variance weighted | 31 | 0.1163  | 0.0908 | 0.2004 | -0.0055 | 0.0178 | 0.7573 | 33.3829 | 0.2626 | 17.9509  |
| IschemicStroke | MF0062 | Simple mode               | 31 | 0.1771  | 0.2570 | 0.4960 | -0.0055 | 0.0178 | 0.7573 | 33.3829 | 0.2626 | 17.9509  |
| IschemicStroke | MF0062 | Weighted mode             | 31 | 0.2448  | 0.1979 | 0.2257 | -0.0055 | 0.0178 | 0.7573 | 33.3829 | 0.2626 | 17.9509  |
| IschemicStroke | MF0063 | MR Egger                  | 31 | 0.0152  | 0.0532 | 0.7764 | 0.0014  | 0.0038 | 0.7162 | 34.9749 | 0.2054 | 149.0755 |
| IschemicStroke | MF0063 | Weighted median           | 31 | 0.0284  | 0.0276 | 0.3031 | 0.0014  | 0.0038 | 0.7162 | 34.9749 | 0.2054 | 149.0755 |
| IschemicStroke | MF0063 | Inverse variance weighted | 31 | 0.0334  | 0.0195 | 0.0866 | 0.0014  | 0.0038 | 0.7162 | 34.9749 | 0.2054 | 149.0755 |
| IschemicStroke | MF0063 | Simple mode               | 31 | -0.0098 | 0.0551 | 0.8600 | 0.0014  | 0.0038 | 0.7162 | 34.9749 | 0.2054 | 149.0755 |
| IschemicStroke | MF0063 | Weighted mode             | 31 | 0.0097  | 0.0445 | 0.8294 | 0.0014  | 0.0038 | 0.7162 | 34.9749 | 0.2054 | 149.0755 |
| IschemicStroke | MF0064 | MR Egger                  | 31 | 0.1950  | 0.2212 | 0.3852 | -0.0162 | 0.0158 | 0.3136 | 23.5966 | 0.7900 | 16.7674  |
| IschemicStroke | MF0064 | Weighted median           | 31 | -0.0069 | 0.1288 | 0.9570 | -0.0162 | 0.0158 | 0.3136 | 23.5966 | 0.7900 | 16.7674  |
| IschemicStroke | MF0064 | Inverse variance weighted | 31 | -0.0156 | 0.0822 | 0.8499 | -0.0162 | 0.0158 | 0.3136 | 23.5966 | 0.7900 | 16.7674  |
| IschemicStroke | MF0064 | Simple mode               | 31 | 0.3589  | 0.2632 | 0.1829 | -0.0162 | 0.0158 | 0.3136 | 23.5966 | 0.7900 | 16.7674  |
| IschemicStroke | MF0064 | Weighted mode             | 31 | 0.3389  | 0.2154 | 0.1262 | -0.0162 | 0.0158 | 0.3136 | 23.5966 | 0.7900 | 16.7674  |
| IschemicStroke | MF0065 | MR Egger                  | 31 | 0.0037  | 0.0467 | 0.9375 | -0.0009 | 0.0033 | 0.7836 | 36.7989 | 0.1514 | 223.9887 |
| IschemicStroke | MF0065 | Weighted median           | 31 | 0.0017  | 0.0242 | 0.9423 | -0.0009 | 0.0033 | 0.7836 | 36.7989 | 0.1514 | 223.9887 |
| IschemicStroke | MF0065 | Inverse variance weighted | 31 | -0.0083 | 0.0171 | 0.6261 | -0.0009 | 0.0033 | 0.7836 | 36.7989 | 0.1514 | 223.9887 |

|                |        |                           |    |         |        |        |         |        |        |         |        |          |
|----------------|--------|---------------------------|----|---------|--------|--------|---------|--------|--------|---------|--------|----------|
| IschemicStroke | MF0065 | Simple mode               | 31 | -0.0257 | 0.0486 | 0.6007 | -0.0009 | 0.0033 | 0.7836 | 36.7989 | 0.1514 | 223.9887 |
| IschemicStroke | MF0065 | Weighted mode             | 31 | -0.0037 | 0.0356 | 0.9185 | -0.0009 | 0.0033 | 0.7836 | 36.7989 | 0.1514 | 223.9887 |
| IschemicStroke | MF0066 | MR Egger                  | 31 | -0.0300 | 0.1482 | 0.8409 | 0.0065  | 0.0106 | 0.5418 | 31.5572 | 0.3396 | 50.7605  |
| IschemicStroke | MF0066 | Weighted median           | 31 | 0.0471  | 0.0807 | 0.5596 | 0.0065  | 0.0106 | 0.5418 | 31.5572 | 0.3396 | 50.7605  |
| IschemicStroke | MF0066 | Inverse variance weighted | 31 | 0.0549  | 0.0545 | 0.3134 | 0.0065  | 0.0106 | 0.5418 | 31.5572 | 0.3396 | 50.7605  |
| IschemicStroke | MF0066 | Simple mode               | 31 | -0.0561 | 0.1614 | 0.7306 | 0.0065  | 0.0106 | 0.5418 | 31.5572 | 0.3396 | 50.7605  |
| IschemicStroke | MF0066 | Weighted mode             | 31 | -0.0169 | 0.1158 | 0.8847 | 0.0065  | 0.0106 | 0.5418 | 31.5572 | 0.3396 | 50.7605  |
| IschemicStroke | MF0067 | MR Egger                  | 31 | -0.0034 | 0.0384 | 0.9296 | -0.0007 | 0.0027 | 0.8075 | 22.6275 | 0.7933 | 301.2772 |
| IschemicStroke | MF0067 | Weighted median           | 31 | -0.0145 | 0.0210 | 0.4879 | -0.0007 | 0.0027 | 0.8075 | 22.6275 | 0.7933 | 301.2772 |
| IschemicStroke | MF0067 | Inverse variance weighted | 31 | -0.0122 | 0.0143 | 0.3931 | -0.0007 | 0.0027 | 0.8075 | 22.6275 | 0.7933 | 301.2772 |
| IschemicStroke | MF0067 | Simple mode               | 31 | -0.0014 | 0.0370 | 0.9690 | -0.0007 | 0.0027 | 0.8075 | 22.6275 | 0.7933 | 301.2772 |
| IschemicStroke | MF0067 | Weighted mode             | 31 | -0.0044 | 0.0301 | 0.8849 | -0.0007 | 0.0027 | 0.8075 | 22.6275 | 0.7933 | 301.2772 |
| IschemicStroke | MF0068 | MR Egger                  | 31 | -0.0348 | 0.0350 | 0.3287 | 0.0027  | 0.0025 | 0.2969 | 27.9921 | 0.5709 | 333.9761 |
| IschemicStroke | MF0068 | Weighted median           | 31 | -0.0084 | 0.0184 | 0.6469 | 0.0027  | 0.0025 | 0.2969 | 27.9921 | 0.5709 | 333.9761 |
| IschemicStroke | MF0068 | Inverse variance weighted | 31 | -0.0003 | 0.0130 | 0.9844 | 0.0027  | 0.0025 | 0.2969 | 27.9921 | 0.5709 | 333.9761 |
| IschemicStroke | MF0068 | Simple mode               | 31 | -0.0155 | 0.0377 | 0.6835 | 0.0027  | 0.0025 | 0.2969 | 27.9921 | 0.5709 | 333.9761 |
| IschemicStroke | MF0068 | Weighted mode             | 31 | -0.0147 | 0.0306 | 0.6341 | 0.0027  | 0.0025 | 0.2969 | 27.9921 | 0.5709 | 333.9761 |
| IschemicStroke | MF0069 | MR Egger                  | 31 | -0.1173 | 0.2086 | 0.5783 | 0.0084  | 0.0149 | 0.5765 | 34.3595 | 0.2263 | 13.6578  |
| IschemicStroke | MF0069 | Weighted median           | 31 | 0.0645  | 0.1125 | 0.5660 | 0.0084  | 0.0149 | 0.5765 | 34.3595 | 0.2263 | 13.6578  |
| IschemicStroke | MF0069 | Inverse variance weighted | 31 | -0.0079 | 0.0766 | 0.9182 | 0.0084  | 0.0149 | 0.5765 | 34.3595 | 0.2263 | 13.6578  |
| IschemicStroke | MF0069 | Simple mode               | 31 | 0.3058  | 0.2131 | 0.1616 | 0.0084  | 0.0149 | 0.5765 | 34.3595 | 0.2263 | 13.6578  |
| IschemicStroke | MF0069 | Weighted mode             | 31 | 0.0703  | 0.1633 | 0.6700 | 0.0084  | 0.0149 | 0.5765 | 34.3595 | 0.2263 | 13.6578  |
| IschemicStroke | MF0070 | MR Egger                  | 31 | 0.0305  | 0.2295 | 0.8953 | 0.0015  | 0.0164 | 0.9274 | 28.3042 | 0.5017 | 23.4733  |
| IschemicStroke | MF0070 | Weighted median           | 31 | 0.0358  | 0.1312 | 0.7851 | 0.0015  | 0.0164 | 0.9274 | 28.3042 | 0.5017 | 23.4733  |
| IschemicStroke | MF0070 | Inverse variance weighted | 31 | 0.0500  | 0.0853 | 0.5573 | 0.0015  | 0.0164 | 0.9274 | 28.3042 | 0.5017 | 23.4733  |
| IschemicStroke | MF0070 | Simple mode               | 31 | 0.0725  | 0.2307 | 0.7554 | 0.0015  | 0.0164 | 0.9274 | 28.3042 | 0.5017 | 23.4733  |
| IschemicStroke | MF0070 | Weighted mode             | 31 | 0.0551  | 0.1648 | 0.7404 | 0.0015  | 0.0164 | 0.9274 | 28.3042 | 0.5017 | 23.4733  |
| IschemicStroke | MF0071 | MR Egger                  | 31 | 0.0146  | 0.0292 | 0.6200 | -0.0014 | 0.0021 | 0.5078 | 19.8281 | 0.8982 | 538.0187 |
| IschemicStroke | MF0071 | Weighted median           | 31 | 0.0063  | 0.0162 | 0.6964 | -0.0014 | 0.0021 | 0.5078 | 19.8281 | 0.8982 | 538.0187 |
| IschemicStroke | MF0071 | Inverse variance weighted | 31 | -0.0035 | 0.0109 | 0.7437 | -0.0014 | 0.0021 | 0.5078 | 19.8281 | 0.8982 | 538.0187 |
| IschemicStroke | MF0071 | Simple mode               | 31 | 0.0162  | 0.0299 | 0.5926 | -0.0014 | 0.0021 | 0.5078 | 19.8281 | 0.8982 | 538.0187 |
| IschemicStroke | MF0071 | Weighted mode             | 31 | 0.0116  | 0.0218 | 0.5968 | -0.0014 | 0.0021 | 0.5078 | 19.8281 | 0.8982 | 538.0187 |
| IschemicStroke | MF0072 | MR Egger                  | 31 | -0.0902 | 0.2205 | 0.6855 | 0.0006  | 0.0158 | 0.9699 | 21.1815 | 0.8525 | 17.2942  |
| IschemicStroke | MF0072 | Weighted median           | 31 | -0.0501 | 0.1205 | 0.6776 | 0.0006  | 0.0158 | 0.9699 | 21.1815 | 0.8525 | 17.2942  |
| IschemicStroke | MF0072 | Inverse variance weighted | 31 | -0.0824 | 0.0819 | 0.3145 | 0.0006  | 0.0158 | 0.9699 | 21.1815 | 0.8525 | 17.2942  |
| IschemicStroke | MF0072 | Simple mode               | 31 | 0.0215  | 0.2030 | 0.9165 | 0.0006  | 0.0158 | 0.9699 | 21.1815 | 0.8525 | 17.2942  |
| IschemicStroke | MF0072 | Weighted mode             | 31 | -0.0233 | 0.1615 | 0.8861 | 0.0006  | 0.0158 | 0.9699 | 21.1815 | 0.8525 | 17.2942  |
| IschemicStroke | MF0073 | MR Egger                  | 31 | -0.0146 | 0.0452 | 0.7498 | 0.0008  | 0.0032 | 0.8024 | 29.2827 | 0.4504 | 271.7105 |
| IschemicStroke | MF0073 | Weighted median           | 31 | -0.0102 | 0.0235 | 0.6650 | 0.0008  | 0.0032 | 0.8024 | 29.2827 | 0.4504 | 271.7105 |
| IschemicStroke | MF0073 | Inverse variance weighted | 31 | -0.0040 | 0.0167 | 0.8130 | 0.0008  | 0.0032 | 0.8024 | 29.2827 | 0.4504 | 271.7105 |
| IschemicStroke | MF0073 | Simple mode               | 31 | 0.0085  | 0.0500 | 0.8655 | 0.0008  | 0.0032 | 0.8024 | 29.2827 | 0.4504 | 271.7105 |
| IschemicStroke | MF0073 | Weighted mode             | 31 | -0.0023 | 0.0357 | 0.9487 | 0.0008  | 0.0032 | 0.8024 | 29.2827 | 0.4504 | 271.7105 |
| IschemicStroke | MF0074 | MR Egger                  | 31 | 0.0249  | 0.0460 | 0.5932 | -0.0023 | 0.0033 | 0.4971 | 26.4849 | 0.5995 | 268.0768 |
| IschemicStroke | MF0074 | Weighted median           | 31 | -0.0082 | 0.0258 | 0.7509 | -0.0023 | 0.0033 | 0.4971 | 26.4849 | 0.5995 | 268.0768 |
| IschemicStroke | MF0074 | Inverse variance weighted | 31 | -0.0045 | 0.0171 | 0.7912 | -0.0023 | 0.0033 | 0.4971 | 26.4849 | 0.5995 | 268.0768 |
| IschemicStroke | MF0074 | Simple mode               | 31 | -0.0103 | 0.0440 | 0.8159 | -0.0023 | 0.0033 | 0.4971 | 26.4849 | 0.5995 | 268.0768 |
| IschemicStroke | MF0074 | Weighted mode             | 31 | -0.0020 | 0.0359 | 0.9561 | -0.0023 | 0.0033 | 0.4971 | 26.4849 | 0.5995 | 268.0768 |
| IschemicStroke | MF0075 | MR Egger                  | 31 | -0.0521 | 0.0693 | 0.4588 | 0.0065  | 0.0050 | 0.1998 | 16.9671 | 0.9730 | 136.2169 |
| IschemicStroke | MF0075 | Weighted median           | 31 | 0.0111  | 0.0367 | 0.7630 | 0.0065  | 0.0050 | 0.1998 | 16.9671 | 0.9730 | 136.2169 |
| IschemicStroke | MF0075 | Inverse variance weighted | 31 | 0.0324  | 0.0258 | 0.2085 | 0.0065  | 0.0050 | 0.1998 | 16.9671 | 0.9730 | 136.2169 |
| IschemicStroke | MF0075 | Simple mode               | 31 | 0.0810  | 0.0702 | 0.2573 | 0.0065  | 0.0050 | 0.1998 | 16.9671 | 0.9730 | 136.2169 |
| IschemicStroke | MF0075 | Weighted mode             | 31 | -0.0333 | 0.0558 | 0.5548 | 0.0065  | 0.0050 | 0.1998 | 16.9671 | 0.9730 | 136.2169 |
| IschemicStroke | MF0076 | MR Egger                  | 31 | 0.1559  | 0.1965 | 0.4342 | -0.0100 | 0.0141 | 0.4835 | 28.1744 | 0.5086 | 32.8375  |
| IschemicStroke | MF0076 | Weighted median           | 31 | 0.0714  | 0.1095 | 0.5140 | -0.0100 | 0.0141 | 0.4835 | 28.1744 | 0.5086 | 32.8375  |
| IschemicStroke | MF0076 | Inverse variance weighted | 31 | 0.0264  | 0.0730 | 0.7180 | -0.0100 | 0.0141 | 0.4835 | 28.1744 | 0.5086 | 32.8375  |
| IschemicStroke | MF0076 | Simple mode               | 31 | 0.1666  | 0.2004 | 0.4122 | -0.0100 | 0.0141 | 0.4835 | 28.1744 | 0.5086 | 32.8375  |
| IschemicStroke | MF0076 | Weighted mode             | 31 | 0.2192  | 0.1800 | 0.2328 | -0.0100 | 0.0141 | 0.4835 | 28.1744 | 0.5086 | 32.8375  |
| IschemicStroke | MF0077 | MR Egger                  | 31 | -0.0036 | 0.1379 | 0.9796 | -0.0018 | 0.0099 | 0.8577 | 16.2949 | 0.9720 | 61.1965  |
| IschemicStroke | MF0077 | Weighted median           | 31 | 0.0169  | 0.0752 | 0.8218 | -0.0018 | 0.0099 | 0.8577 | 16.2949 | 0.9720 | 61.1965  |
| IschemicStroke | MF0077 | Inverse variance weighted | 31 | -0.0267 | 0.0512 | 0.6019 | -0.0018 | 0.0099 | 0.8577 | 16.2949 | 0.9720 | 61.1965  |
| IschemicStroke | MF0077 | Simple mode               | 31 | 0.0156  | 0.1236 | 0.9005 | -0.0018 | 0.0099 | 0.8577 | 16.2949 | 0.9720 | 61.1965  |

|                |        |                           |    |         |        |        |         |        |        |         |        |          |
|----------------|--------|---------------------------|----|---------|--------|--------|---------|--------|--------|---------|--------|----------|
| IschemicStroke | MF0077 | Weighted mode             | 31 | 0.0365  | 0.1039 | 0.7276 | -0.0018 | 0.0099 | 0.8577 | 16.2949 | 0.9720 | 61.1965  |
| IschemicStroke | MF0078 | MR Egger                  | 31 | -0.0118 | 0.1366 | 0.9316 | 0.0023  | 0.0098 | 0.8160 | 41.2581 | 0.0654 | 53.6819  |
| IschemicStroke | MF0078 | Weighted median           | 31 | 0.0355  | 0.0664 | 0.5927 | 0.0023  | 0.0098 | 0.8160 | 41.2581 | 0.0654 | 53.6819  |
| IschemicStroke | MF0078 | Inverse variance weighted | 31 | 0.0179  | 0.0499 | 0.7193 | 0.0023  | 0.0098 | 0.8160 | 41.2581 | 0.0654 | 53.6819  |
| IschemicStroke | MF0078 | Simple mode               | 31 | 0.0734  | 0.1323 | 0.5833 | 0.0023  | 0.0098 | 0.8160 | 41.2581 | 0.0654 | 53.6819  |
| IschemicStroke | MF0078 | Weighted mode             | 31 | 0.0604  | 0.1016 | 0.5562 | 0.0023  | 0.0098 | 0.8160 | 41.2581 | 0.0654 | 53.6819  |
| IschemicStroke | MF0079 | MR Egger                  | 31 | -0.0410 | 0.2181 | 0.8521 | 0.0080  | 0.0156 | 0.6117 | 20.6515 | 0.8715 | 32.3372  |
| IschemicStroke | MF0079 | Weighted median           | 31 | 0.0297  | 0.1153 | 0.7967 | 0.0080  | 0.0156 | 0.6117 | 20.6515 | 0.8715 | 32.3372  |
| IschemicStroke | MF0079 | Inverse variance weighted | 31 | 0.0629  | 0.0810 | 0.4378 | 0.0080  | 0.0156 | 0.6117 | 20.6515 | 0.8715 | 32.3372  |
| IschemicStroke | MF0079 | Simple mode               | 31 | 0.3451  | 0.2096 | 0.1102 | 0.0080  | 0.0156 | 0.6117 | 20.6515 | 0.8715 | 32.3372  |
| IschemicStroke | MF0079 | Weighted mode             | 31 | -0.0105 | 0.1652 | 0.9500 | 0.0080  | 0.0156 | 0.6117 | 20.6515 | 0.8715 | 32.3372  |
| IschemicStroke | MF0080 | MR Egger                  | 31 | 0.1718  | 0.1752 | 0.3347 | -0.0133 | 0.0125 | 0.2968 | 34.2296 | 0.2717 | 26.0587  |
| IschemicStroke | MF0080 | Weighted median           | 31 | 0.0147  | 0.0924 | 0.8734 | -0.0133 | 0.0125 | 0.2968 | 34.2296 | 0.2717 | 26.0587  |
| IschemicStroke | MF0080 | Inverse variance weighted | 31 | -0.0010 | 0.0652 | 0.9883 | -0.0133 | 0.0125 | 0.2968 | 34.2296 | 0.2717 | 26.0587  |
| IschemicStroke | MF0080 | Simple mode               | 31 | -0.0672 | 0.1576 | 0.6730 | -0.0133 | 0.0125 | 0.2968 | 34.2296 | 0.2717 | 26.0587  |
| IschemicStroke | MF0080 | Weighted mode             | 31 | -0.0054 | 0.1279 | 0.9667 | -0.0133 | 0.0125 | 0.2968 | 34.2296 | 0.2717 | 26.0587  |
| IschemicStroke | MF0081 | MR Egger                  | 31 | -0.0043 | 0.4384 | 0.9922 | 0.0096  | 0.0314 | 0.7623 | 42.1197 | 0.0548 | 3.3108   |
| IschemicStroke | MF0081 | Weighted median           | 31 | 0.0123  | 0.2001 | 0.9509 | 0.0096  | 0.0314 | 0.7623 | 42.1197 | 0.0548 | 3.3108   |
| IschemicStroke | MF0081 | Inverse variance weighted | 31 | 0.1199  | 0.1604 | 0.4546 | 0.0096  | 0.0314 | 0.7623 | 42.1197 | 0.0548 | 3.3108   |
| IschemicStroke | MF0081 | Simple mode               | 31 | 0.0832  | 0.3950 | 0.8346 | 0.0096  | 0.0314 | 0.7623 | 42.1197 | 0.0548 | 3.3108   |
| IschemicStroke | MF0081 | Weighted mode             | 31 | -0.0671 | 0.2938 | 0.8210 | 0.0096  | 0.0314 | 0.7623 | 42.1197 | 0.0548 | 3.3108   |
| IschemicStroke | MF0082 | MR Egger                  | 31 | -0.2129 | 0.2865 | 0.4635 | 0.0133  | 0.0205 | 0.5207 | 30.3730 | 0.3956 | 2.6864   |
| IschemicStroke | MF0082 | Weighted median           | 31 | 0.0313  | 0.1607 | 0.8458 | 0.0133  | 0.0205 | 0.5207 | 30.3730 | 0.3956 | 2.6864   |
| IschemicStroke | MF0082 | Inverse variance weighted | 31 | -0.0399 | 0.1055 | 0.7050 | 0.0133  | 0.0205 | 0.5207 | 30.3730 | 0.3956 | 2.6864   |
| IschemicStroke | MF0082 | Simple mode               | 31 | 0.0990  | 0.2789 | 0.7250 | 0.0133  | 0.0205 | 0.5207 | 30.3730 | 0.3956 | 2.6864   |
| IschemicStroke | MF0082 | Weighted mode             | 31 | 0.0433  | 0.2161 | 0.8424 | 0.0133  | 0.0205 | 0.5207 | 30.3730 | 0.3956 | 2.6864   |
| IschemicStroke | MF0083 | MR Egger                  | 31 | 0.2952  | 0.2877 | 0.3132 | -0.0142 | 0.0206 | 0.4967 | 12.0170 | 0.9977 | 22.0634  |
| IschemicStroke | MF0083 | Weighted median           | 31 | 0.1351  | 0.1476 | 0.3597 | -0.0142 | 0.0206 | 0.4967 | 12.0170 | 0.9977 | 22.0634  |
| IschemicStroke | MF0083 | Inverse variance weighted | 31 | 0.1114  | 0.1069 | 0.2973 | -0.0142 | 0.0206 | 0.4967 | 12.0170 | 0.9977 | 22.0634  |
| IschemicStroke | MF0083 | Simple mode               | 31 | 0.1086  | 0.2726 | 0.6931 | -0.0142 | 0.0206 | 0.4967 | 12.0170 | 0.9977 | 22.0634  |
| IschemicStroke | MF0083 | Weighted mode             | 31 | 0.1788  | 0.2173 | 0.4169 | -0.0142 | 0.0206 | 0.4967 | 12.0170 | 0.9977 | 22.0634  |
| IschemicStroke | MF0084 | MR Egger                  | 31 | -0.4689 | 0.6977 | 0.5069 | 0.0452  | 0.0500 | 0.3728 | 48.3374 | 0.0183 | 502.1073 |
| IschemicStroke | MF0084 | Weighted median           | 31 | 0.0953  | 0.3449 | 0.7823 | 0.0452  | 0.0500 | 0.3728 | 48.3374 | 0.0183 | 502.1073 |
| IschemicStroke | MF0084 | Inverse variance weighted | 31 | 0.1174  | 0.2585 | 0.6496 | 0.0452  | 0.0500 | 0.3728 | 48.3374 | 0.0183 | 502.1073 |
| IschemicStroke | MF0084 | Simple mode               | 31 | -0.2237 | 0.6993 | 0.7512 | 0.0452  | 0.0500 | 0.3728 | 48.3374 | 0.0183 | 502.1073 |
| IschemicStroke | MF0084 | Weighted mode             | 31 | -0.0945 | 0.4654 | 0.8404 | 0.0452  | 0.0500 | 0.3728 | 48.3374 | 0.0183 | 502.1073 |
| IschemicStroke | MF0085 | MR Egger                  | 31 | 0.0226  | 0.2257 | 0.9209 | -0.0019 | 0.0162 | 0.9075 | 23.5716 | 0.7498 | 18.5227  |
| IschemicStroke | MF0085 | Weighted median           | 31 | -0.0134 | 0.1177 | 0.9094 | -0.0019 | 0.0162 | 0.9075 | 23.5716 | 0.7498 | 18.5227  |
| IschemicStroke | MF0085 | Inverse variance weighted | 31 | -0.0020 | 0.0839 | 0.9812 | -0.0019 | 0.0162 | 0.9075 | 23.5716 | 0.7498 | 18.5227  |
| IschemicStroke | MF0085 | Simple mode               | 31 | -0.0988 | 0.2246 | 0.6634 | -0.0019 | 0.0162 | 0.9075 | 23.5716 | 0.7498 | 18.5227  |
| IschemicStroke | MF0085 | Weighted mode             | 31 | -0.0291 | 0.1728 | 0.8673 | -0.0019 | 0.0162 | 0.9075 | 23.5716 | 0.7498 | 18.5227  |
| IschemicStroke | MF0086 | MR Egger                  | 31 | -0.0434 | 0.0350 | 0.2249 | 0.0038  | 0.0025 | 0.1411 | 21.2532 | 0.8798 | 398.2481 |
| IschemicStroke | MF0086 | Weighted median           | 31 | 0.0010  | 0.0191 | 0.9578 | 0.0038  | 0.0025 | 0.1411 | 21.2532 | 0.8798 | 398.2481 |
| IschemicStroke | MF0086 | Inverse variance weighted | 31 | 0.0058  | 0.0130 | 0.6579 | 0.0038  | 0.0025 | 0.1411 | 21.2532 | 0.8798 | 398.2481 |
| IschemicStroke | MF0086 | Simple mode               | 31 | 0.0137  | 0.0394 | 0.7302 | 0.0038  | 0.0025 | 0.1411 | 21.2532 | 0.8798 | 398.2481 |
| IschemicStroke | MF0086 | Weighted mode             | 31 | -0.0010 | 0.0336 | 0.9765 | 0.0038  | 0.0025 | 0.1411 | 21.2532 | 0.8798 | 398.2481 |
| IschemicStroke | MF0087 | MR Egger                  | 31 | 0.0942  | 0.1341 | 0.4881 | -0.0081 | 0.0096 | 0.4045 | 19.2944 | 0.9135 | 72.3666  |
| IschemicStroke | MF0087 | Weighted median           | 31 | -0.0113 | 0.0693 | 0.8700 | -0.0081 | 0.0096 | 0.4045 | 19.2944 | 0.9135 | 72.3666  |
| IschemicStroke | MF0087 | Inverse variance weighted | 31 | -0.0111 | 0.0498 | 0.8231 | -0.0081 | 0.0096 | 0.4045 | 19.2944 | 0.9135 | 72.3666  |
| IschemicStroke | MF0087 | Simple mode               | 31 | -0.0404 | 0.1469 | 0.7850 | -0.0081 | 0.0096 | 0.4045 | 19.2944 | 0.9135 | 72.3666  |
| IschemicStroke | MF0087 | Weighted mode             | 31 | -0.0257 | 0.1168 | 0.8273 | -0.0081 | 0.0096 | 0.4045 | 19.2944 | 0.9135 | 72.3666  |
| IschemicStroke | MF0088 | MR Egger                  | 31 | -0.1375 | 0.1301 | 0.2991 | 0.0129  | 0.0093 | 0.1755 | 42.7198 | 0.0620 | 46.2480  |
| IschemicStroke | MF0088 | Weighted median           | 31 | 0.0245  | 0.0650 | 0.7057 | 0.0129  | 0.0093 | 0.1755 | 42.7198 | 0.0620 | 46.2480  |
| IschemicStroke | MF0088 | Inverse variance weighted | 31 | 0.0302  | 0.0491 | 0.5386 | 0.0129  | 0.0093 | 0.1755 | 42.7198 | 0.0620 | 46.2480  |
| IschemicStroke | MF0088 | Simple mode               | 31 | 0.0706  | 0.1131 | 0.5373 | 0.0129  | 0.0093 | 0.1755 | 42.7198 | 0.0620 | 46.2480  |
| IschemicStroke | MF0088 | Weighted mode             | 31 | 0.0210  | 0.0833 | 0.8028 | 0.0129  | 0.0093 | 0.1755 | 42.7198 | 0.0620 | 46.2480  |
| IschemicStroke | MF0089 | MR Egger                  | 31 | 0.0506  | 0.1515 | 0.7406 | -0.0017 | 0.0108 | 0.8752 | 23.8656 | 0.7355 | 50.3225  |
| IschemicStroke | MF0089 | Weighted median           | 31 | 0.0318  | 0.0813 | 0.6957 | -0.0017 | 0.0108 | 0.8752 | 23.8656 | 0.7355 | 50.3225  |
| IschemicStroke | MF0089 | Inverse variance weighted | 31 | 0.0284  | 0.0563 | 0.6146 | -0.0017 | 0.0108 | 0.8752 | 23.8656 | 0.7355 | 50.3225  |
| IschemicStroke | MF0089 | Simple mode               | 31 | 0.0204  | 0.1434 | 0.8876 | -0.0017 | 0.0108 | 0.8752 | 23.8656 | 0.7355 | 50.3225  |
| IschemicStroke | MF0089 | Weighted mode             | 31 | 0.0644  | 0.1178 | 0.5884 | -0.0017 | 0.0108 | 0.8752 | 23.8656 | 0.7355 | 50.3225  |

|                |        |                           |    |         |        |        |         |        |        |         |        |          |
|----------------|--------|---------------------------|----|---------|--------|--------|---------|--------|--------|---------|--------|----------|
| IschemicStroke | MF0090 | MR Egger                  | 31 | -0.0070 | 0.1472 | 0.9625 | 0.0003  | 0.0105 | 0.9758 | 38.4722 | 0.1122 | 37.5576  |
| IschemicStroke | MF0090 | Weighted median           | 31 | 0.0254  | 0.0714 | 0.7220 | 0.0003  | 0.0105 | 0.9758 | 38.4722 | 0.1122 | 37.5576  |
| IschemicStroke | MF0090 | Inverse variance weighted | 31 | -0.0028 | 0.0538 | 0.9583 | 0.0003  | 0.0105 | 0.9758 | 38.4722 | 0.1122 | 37.5576  |
| IschemicStroke | MF0090 | Simple mode               | 31 | 0.0434  | 0.1265 | 0.7338 | 0.0003  | 0.0105 | 0.9758 | 38.4722 | 0.1122 | 37.5576  |
| IschemicStroke | MF0090 | Weighted mode             | 31 | 0.0395  | 0.0899 | 0.6636 | 0.0003  | 0.0105 | 0.9758 | 38.4722 | 0.1122 | 37.5576  |
| IschemicStroke | MF0091 | MR Egger                  | 31 | -0.0094 | 0.1472 | 0.9498 | 0.0004  | 0.0105 | 0.9692 | 38.3767 | 0.1142 | 37.4804  |
| IschemicStroke | MF0091 | Weighted median           | 31 | 0.0202  | 0.0715 | 0.7777 | 0.0004  | 0.0105 | 0.9692 | 38.3767 | 0.1142 | 37.4804  |
| IschemicStroke | MF0091 | Inverse variance weighted | 31 | -0.0040 | 0.0538 | 0.9403 | 0.0004  | 0.0105 | 0.9692 | 38.3767 | 0.1142 | 37.4804  |
| IschemicStroke | MF0091 | Simple mode               | 31 | 0.0418  | 0.1251 | 0.7404 | 0.0004  | 0.0105 | 0.9692 | 38.3767 | 0.1142 | 37.4804  |
| IschemicStroke | MF0091 | Weighted mode             | 31 | 0.0379  | 0.0993 | 0.7055 | 0.0004  | 0.0105 | 0.9692 | 38.3767 | 0.1142 | 37.4804  |
| IschemicStroke | MF0092 | MR Egger                  | 31 | 0.0414  | 0.1530 | 0.7888 | -0.0021 | 0.0110 | 0.8459 | 34.4100 | 0.2246 | 45.9267  |
| IschemicStroke | MF0092 | Weighted median           | 31 | 0.0626  | 0.0752 | 0.4050 | -0.0021 | 0.0110 | 0.8459 | 34.4100 | 0.2246 | 45.9267  |
| IschemicStroke | MF0092 | Inverse variance weighted | 31 | 0.0135  | 0.0559 | 0.8092 | -0.0021 | 0.0110 | 0.8459 | 34.4100 | 0.2246 | 45.9267  |
| IschemicStroke | MF0092 | Simple mode               | 31 | 0.0121  | 0.1570 | 0.9389 | -0.0021 | 0.0110 | 0.8459 | 34.4100 | 0.2246 | 45.9267  |
| IschemicStroke | MF0092 | Weighted mode             | 31 | 0.0351  | 0.1226 | 0.7765 | -0.0021 | 0.0110 | 0.8459 | 34.4100 | 0.2246 | 45.9267  |
| IschemicStroke | MF0093 | MR Egger                  | 31 | -0.2992 | 0.4994 | 0.5538 | 0.0180  | 0.0358 | 0.6182 | 37.4345 | 0.1354 | 1.4502   |
| IschemicStroke | MF0093 | Weighted median           | 31 | -0.0323 | 0.2550 | 0.8993 | 0.0180  | 0.0358 | 0.6182 | 37.4345 | 0.1354 | 1.4502   |
| IschemicStroke | MF0093 | Inverse variance weighted | 31 | -0.0656 | 0.1833 | 0.7205 | 0.0180  | 0.0358 | 0.6182 | 37.4345 | 0.1354 | 1.4502   |
| IschemicStroke | MF0093 | Simple mode               | 31 | 0.2706  | 0.4651 | 0.5650 | 0.0180  | 0.0358 | 0.6182 | 37.4345 | 0.1354 | 1.4502   |
| IschemicStroke | MF0093 | Weighted mode             | 31 | 0.0866  | 0.3612 | 0.8122 | 0.0180  | 0.0358 | 0.6182 | 37.4345 | 0.1354 | 1.4502   |
| IschemicStroke | MF0094 | MR Egger                  | 31 | 0.2280  | 0.2103 | 0.2871 | -0.0162 | 0.0151 | 0.2908 | 41.2190 | 0.0833 | 16.5448  |
| IschemicStroke | MF0094 | Weighted median           | 31 | 0.0120  | 0.1004 | 0.9049 | -0.0162 | 0.0151 | 0.2908 | 41.2190 | 0.0833 | 16.5448  |
| IschemicStroke | MF0094 | Inverse variance weighted | 31 | 0.0180  | 0.0783 | 0.8186 | -0.0162 | 0.0151 | 0.2908 | 41.2190 | 0.0833 | 16.5448  |
| IschemicStroke | MF0094 | Simple mode               | 31 | -0.0824 | 0.1785 | 0.6476 | -0.0162 | 0.0151 | 0.2908 | 41.2190 | 0.0833 | 16.5448  |
| IschemicStroke | MF0094 | Weighted mode             | 31 | -0.0290 | 0.1402 | 0.8374 | -0.0162 | 0.0151 | 0.2908 | 41.2190 | 0.0833 | 16.5448  |
| IschemicStroke | MF0095 | MR Egger                  | 31 | -0.1078 | 0.2088 | 0.6098 | 0.0133  | 0.0150 | 0.3798 | 28.2851 | 0.5027 | 28.6410  |
| IschemicStroke | MF0095 | Weighted median           | 31 | 0.0706  | 0.1103 | 0.5220 | 0.0133  | 0.0150 | 0.3798 | 28.2851 | 0.5027 | 28.6410  |
| IschemicStroke | MF0095 | Inverse variance weighted | 31 | 0.0652  | 0.0776 | 0.4009 | 0.0133  | 0.0150 | 0.3798 | 28.2851 | 0.5027 | 28.6410  |
| IschemicStroke | MF0095 | Simple mode               | 31 | 0.1646  | 0.2124 | 0.4444 | 0.0133  | 0.0150 | 0.3798 | 28.2851 | 0.5027 | 28.6410  |
| IschemicStroke | MF0095 | Weighted mode             | 31 | 0.0875  | 0.1689 | 0.6084 | 0.0133  | 0.0150 | 0.3798 | 28.2851 | 0.5027 | 28.6410  |
| IschemicStroke | MF0096 | MR Egger                  | 31 | -0.0829 | 0.0604 | 0.1803 | 0.0070  | 0.0043 | 0.1162 | 23.2553 | 0.8046 | 183.0293 |
| IschemicStroke | MF0096 | Weighted median           | 31 | -0.0192 | 0.0319 | 0.5462 | 0.0070  | 0.0043 | 0.1162 | 23.2553 | 0.8046 | 183.0293 |
| IschemicStroke | MF0096 | Inverse variance weighted | 31 | 0.0079  | 0.0224 | 0.7251 | 0.0070  | 0.0043 | 0.1162 | 23.2553 | 0.8046 | 183.0293 |
| IschemicStroke | MF0096 | Simple mode               | 31 | -0.0078 | 0.0678 | 0.9090 | 0.0070  | 0.0043 | 0.1162 | 23.2553 | 0.8046 | 183.0293 |
| IschemicStroke | MF0096 | Weighted mode             | 31 | -0.0545 | 0.0514 | 0.2971 | 0.0070  | 0.0043 | 0.1162 | 23.2553 | 0.8046 | 183.0293 |
| IschemicStroke | MF0097 | MR Egger                  | 31 | -0.1662 | 0.1876 | 0.3828 | 0.0117  | 0.0134 | 0.3900 | 34.5425 | 0.2200 | 27.5047  |
| IschemicStroke | MF0097 | Weighted median           | 31 | -0.0398 | 0.0995 | 0.6888 | 0.0117  | 0.0134 | 0.3900 | 34.5425 | 0.2200 | 27.5047  |
| IschemicStroke | MF0097 | Inverse variance weighted | 31 | -0.0143 | 0.0694 | 0.8372 | 0.0117  | 0.0134 | 0.3900 | 34.5425 | 0.2200 | 27.5047  |
| IschemicStroke | MF0097 | Simple mode               | 31 | -0.2937 | 0.1890 | 0.1306 | 0.0117  | 0.0134 | 0.3900 | 34.5425 | 0.2200 | 27.5047  |
| IschemicStroke | MF0097 | Weighted mode             | 31 | -0.1203 | 0.1471 | 0.4198 | 0.0117  | 0.0134 | 0.3900 | 34.5425 | 0.2200 | 27.5047  |
| IschemicStroke | MF0098 | MR Egger                  | 31 | -0.0817 | 0.0661 | 0.2259 | 0.0065  | 0.0047 | 0.1812 | 37.3936 | 0.1659 | 165.8195 |
| IschemicStroke | MF0098 | Weighted median           | 31 | -0.0052 | 0.0347 | 0.8821 | 0.0065  | 0.0047 | 0.1812 | 37.3936 | 0.1659 | 165.8195 |
| IschemicStroke | MF0098 | Inverse variance weighted | 31 | 0.0023  | 0.0249 | 0.9269 | 0.0065  | 0.0047 | 0.1812 | 37.3936 | 0.1659 | 165.8195 |
| IschemicStroke | MF0098 | Simple mode               | 31 | 0.0318  | 0.0634 | 0.6196 | 0.0065  | 0.0047 | 0.1812 | 37.3936 | 0.1659 | 165.8195 |
| IschemicStroke | MF0098 | Weighted mode             | 31 | -0.0242 | 0.0501 | 0.6324 | 0.0065  | 0.0047 | 0.1812 | 37.3936 | 0.1659 | 165.8195 |
| IschemicStroke | MF0100 | MR Egger                  | 31 | 0.2444  | 0.6788 | 0.7214 | -0.0353 | 0.0486 | 0.4731 | 32.3325 | 0.3055 | 26.1740  |
| IschemicStroke | MF0100 | Weighted median           | 31 | -0.1843 | 0.3621 | 0.6107 | -0.0353 | 0.0486 | 0.4731 | 32.3325 | 0.3055 | 26.1740  |
| IschemicStroke | MF0100 | Inverse variance weighted | 31 | -0.2138 | 0.2503 | 0.3930 | -0.0353 | 0.0486 | 0.4731 | 32.3325 | 0.3055 | 26.1740  |
| IschemicStroke | MF0100 | Simple mode               | 31 | 0.3464  | 0.7471 | 0.6462 | -0.0353 | 0.0486 | 0.4731 | 32.3325 | 0.3055 | 26.1740  |
| IschemicStroke | MF0100 | Weighted mode             | 31 | 0.3647  | 0.5794 | 0.5339 | -0.0353 | 0.0486 | 0.4731 | 32.3325 | 0.3055 | 26.1740  |
| IschemicStroke | MF0101 | MR Egger                  | 31 | -0.1700 | 0.2338 | 0.4730 | 0.0177  | 0.0167 | 0.2981 | 15.8777 | 0.9838 | 27.0920  |
| IschemicStroke | MF0101 | Weighted median           | 31 | 0.0868  | 0.1207 | 0.4722 | 0.0177  | 0.0167 | 0.2981 | 15.8777 | 0.9838 | 27.0920  |
| IschemicStroke | MF0101 | Inverse variance weighted | 31 | 0.0600  | 0.0869 | 0.4899 | 0.0177  | 0.0167 | 0.2981 | 15.8777 | 0.9838 | 27.0920  |
| IschemicStroke | MF0101 | Simple mode               | 31 | 0.1379  | 0.2119 | 0.5200 | 0.0177  | 0.0167 | 0.2981 | 15.8777 | 0.9838 | 27.0920  |
| IschemicStroke | MF0101 | Weighted mode             | 31 | 0.1069  | 0.1785 | 0.5540 | 0.0177  | 0.0167 | 0.2981 | 15.8777 | 0.9838 | 27.0920  |
| IschemicStroke | MF0102 | MR Egger                  | 31 | 0.3612  | 0.2196 | 0.1109 | -0.0196 | 0.0157 | 0.2225 | 32.5880 | 0.3407 | 16.7948  |
| IschemicStroke | MF0102 | Weighted median           | 31 | 0.0537  | 0.1222 | 0.6603 | -0.0196 | 0.0157 | 0.2225 | 32.5880 | 0.3407 | 16.7948  |
| IschemicStroke | MF0102 | Inverse variance weighted | 31 | 0.1069  | 0.0824 | 0.1941 | -0.0196 | 0.0157 | 0.2225 | 32.5880 | 0.3407 | 16.7948  |
| IschemicStroke | MF0102 | Simple mode               | 31 | -0.0654 | 0.2448 | 0.7912 | -0.0196 | 0.0157 | 0.2225 | 32.5880 | 0.3407 | 16.7948  |
| IschemicStroke | MF0102 | Weighted mode             | 31 | 0.1818  | 0.1912 | 0.3491 | -0.0196 | 0.0157 | 0.2225 | 32.5880 | 0.3407 | 16.7948  |
| IschemicStroke | MF0103 | MR Egger                  | 31 | -0.1082 | 0.1054 | 0.3131 | 0.0110  | 0.0075 | 0.1542 | 27.2668 | 0.6092 | 88.9850  |

|                |                                          |                           |    |         |        |        |         |        |        |         |        |         |
|----------------|------------------------------------------|---------------------------|----|---------|--------|--------|---------|--------|--------|---------|--------|---------|
| IschemicStroke | MF0103                                   | Weighted median           | 31 | -0.0009 | 0.0579 | 0.9869 | 0.0110  | 0.0075 | 0.1542 | 27.2668 | 0.6092 | 88.9850 |
| IschemicStroke | MF0103                                   | Inverse variance weighted | 31 | 0.0350  | 0.0392 | 0.3718 | 0.0110  | 0.0075 | 0.1542 | 27.2668 | 0.6092 | 88.9850 |
| IschemicStroke | MF0103                                   | Simple mode               | 31 | -0.0457 | 0.1013 | 0.6555 | 0.0110  | 0.0075 | 0.1542 | 27.2668 | 0.6092 | 88.9850 |
| IschemicStroke | MF0103                                   | Weighted mode             | 31 | -0.0254 | 0.0776 | 0.7460 | 0.0110  | 0.0075 | 0.1542 | 27.2668 | 0.6092 | 88.9850 |
| IschemicStroke | c_Bacilli                                | MR Egger                  | 31 | -0.2965 | 0.2467 | 0.2391 | 0.0057  | 0.0177 | 0.7498 | 23.0978 | 0.7721 | 7.1521  |
| IschemicStroke | c_Bacilli                                | Weighted median           | 31 | -0.1883 | 0.1351 | 0.1634 | 0.0057  | 0.0177 | 0.7498 | 23.0978 | 0.7721 | 7.1521  |
| IschemicStroke | c_Bacilli                                | Inverse variance weighted | 31 | -0.2228 | 0.0917 | 0.0151 | 0.0057  | 0.0177 | 0.7498 | 23.0978 | 0.7721 | 7.1521  |
| IschemicStroke | c_Bacilli                                | Simple mode               | 31 | -0.1674 | 0.2577 | 0.5207 | 0.0057  | 0.0177 | 0.7498 | 23.0978 | 0.7721 | 7.1521  |
| IschemicStroke | c_Bacilli                                | Weighted mode             | 31 | -0.1795 | 0.2293 | 0.4397 | 0.0057  | 0.0177 | 0.7498 | 23.0978 | 0.7721 | 7.1521  |
| IschemicStroke | c_Betaproteobacteria                     | MR Egger                  | 31 | 1.4011  | 0.4654 | 0.0054 | -0.0819 | 0.0333 | 0.0202 | 26.2996 | 0.6598 | 1.1415  |
| IschemicStroke | c_Betaproteobacteria                     | Weighted median           | 31 | 0.4041  | 0.2541 | 0.1117 | -0.0819 | 0.0333 | 0.0202 | 26.2996 | 0.6598 | 1.1415  |
| IschemicStroke | c_Betaproteobacteria                     | Inverse variance weighted | 31 | 0.3391  | 0.1731 | 0.0501 | -0.0819 | 0.0333 | 0.0202 | 26.2996 | 0.6598 | 1.1415  |
| IschemicStroke | c_Betaproteobacteria                     | Simple mode               | 31 | 0.2800  | 0.5788 | 0.6320 | -0.0819 | 0.0333 | 0.0202 | 26.2996 | 0.6598 | 1.1415  |
| IschemicStroke | c_Betaproteobacteria                     | Weighted mode             | 31 | 0.9942  | 0.4233 | 0.0256 | -0.0819 | 0.0333 | 0.0202 | 26.2996 | 0.6598 | 1.1415  |
| IschemicStroke | c_Negativicutes                          | MR Egger                  | 31 | 0.0385  | 0.3776 | 0.9194 | -0.0018 | 0.0270 | 0.9480 | 29.1390 | 0.4578 | 8.3037  |
| IschemicStroke | c_Negativicutes                          | Weighted median           | 31 | -0.1169 | 0.2108 | 0.5792 | -0.0018 | 0.0270 | 0.9480 | 29.1390 | 0.4578 | 8.3037  |
| IschemicStroke | c_Negativicutes                          | Inverse variance weighted | 31 | 0.0155  | 0.1399 | 0.9119 | -0.0018 | 0.0270 | 0.9480 | 29.1390 | 0.4578 | 8.3037  |
| IschemicStroke | c_Negativicutes                          | Simple mode               | 31 | -0.4710 | 0.3920 | 0.2390 | -0.0018 | 0.0270 | 0.9480 | 29.1390 | 0.4578 | 8.3037  |
| IschemicStroke | c_Negativicutes                          | Weighted mode             | 31 | -0.2219 | 0.3082 | 0.4771 | -0.0018 | 0.0270 | 0.9480 | 29.1390 | 0.4578 | 8.3037  |
| IschemicStroke | f_Acidaminococcaceae                     | MR Egger                  | 31 | 0.5924  | 0.4610 | 0.2089 | -0.0300 | 0.0330 | 0.3711 | 16.9118 | 0.9736 | 7.4267  |
| IschemicStroke | f_Acidaminococcaceae                     | Weighted median           | 31 | 0.2187  | 0.2300 | 0.3417 | -0.0300 | 0.0330 | 0.3711 | 16.9118 | 0.9736 | 7.4267  |
| IschemicStroke | f_Acidaminococcaceae                     | Inverse variance weighted | 31 | 0.2036  | 0.1713 | 0.2347 | -0.0300 | 0.0330 | 0.3711 | 16.9118 | 0.9736 | 7.4267  |
| IschemicStroke | f_Acidaminococcaceae                     | Simple mode               | 31 | 0.1421  | 0.4551 | 0.7570 | -0.0300 | 0.0330 | 0.3711 | 16.9118 | 0.9736 | 7.4267  |
| IschemicStroke | f_Acidaminococcaceae                     | Weighted mode             | 31 | 0.2831  | 0.3644 | 0.4433 | -0.0300 | 0.0330 | 0.3711 | 16.9118 | 0.9736 | 7.4267  |
| IschemicStroke | f_Actinomycetaceae                       | MR Egger                  | 31 | 0.0752  | 0.2222 | 0.7374 | -0.0099 | 0.0159 | 0.5384 | 17.5736 | 0.9525 | 33.0465 |
| IschemicStroke | f_Actinomycetaceae                       | Weighted median           | 31 | 0.0051  | 0.1167 | 0.9649 | -0.0099 | 0.0159 | 0.5384 | 17.5736 | 0.9525 | 33.0465 |
| IschemicStroke | f_Actinomycetaceae                       | Inverse variance weighted | 31 | -0.0532 | 0.0826 | 0.5190 | -0.0099 | 0.0159 | 0.5384 | 17.5736 | 0.9525 | 33.0465 |
| IschemicStroke | f_Actinomycetaceae                       | Simple mode               | 31 | 0.0391  | 0.2345 | 0.8686 | -0.0099 | 0.0159 | 0.5384 | 17.5736 | 0.9525 | 33.0465 |
| IschemicStroke | f_Actinomycetaceae                       | Weighted mode             | 31 | 0.0950  | 0.1911 | 0.6227 | -0.0099 | 0.0159 | 0.5384 | 17.5736 | 0.9525 | 33.0465 |
| IschemicStroke | f_Aerococcaceae                          | MR Egger                  | 31 | 0.5121  | 0.3796 | 0.1878 | -0.0235 | 0.0272 | 0.3945 | 33.6000 | 0.2542 | 3.2642  |
| IschemicStroke | f_Aerococcaceae                          | Weighted median           | 31 | 0.3174  | 0.1931 | 0.1003 | -0.0235 | 0.0272 | 0.3945 | 33.6000 | 0.2542 | 3.2642  |
| IschemicStroke | f_Aerococcaceae                          | Inverse variance weighted | 31 | 0.2075  | 0.1405 | 0.1397 | -0.0235 | 0.0272 | 0.3945 | 33.6000 | 0.2542 | 3.2642  |
| IschemicStroke | f_Aerococcaceae                          | Simple mode               | 31 | 0.2902  | 0.3757 | 0.4459 | -0.0235 | 0.0272 | 0.3945 | 33.6000 | 0.2542 | 3.2642  |
| IschemicStroke | f_Aerococcaceae                          | Weighted mode             | 31 | 0.4186  | 0.2900 | 0.1593 | -0.0235 | 0.0272 | 0.3945 | 33.6000 | 0.2542 | 3.2642  |
| IschemicStroke | f_Bacillaceae                            | MR Egger                  | 31 | 0.1567  | 0.3093 | 0.6162 | -0.0097 | 0.0222 | 0.6639 | 25.6873 | 0.6421 | 3.7409  |
| IschemicStroke | f_Bacillaceae                            | Weighted median           | 31 | 0.0338  | 0.1715 | 0.8436 | -0.0097 | 0.0222 | 0.6639 | 25.6873 | 0.6421 | 3.7409  |
| IschemicStroke | f_Bacillaceae                            | Inverse variance weighted | 31 | 0.0306  | 0.1150 | 0.7899 | -0.0097 | 0.0222 | 0.6639 | 25.6873 | 0.6421 | 3.7409  |
| IschemicStroke | f_Bacillaceae                            | Simple mode               | 31 | -0.0644 | 0.3146 | 0.8392 | -0.0097 | 0.0222 | 0.6639 | 25.6873 | 0.6421 | 3.7409  |
| IschemicStroke | f_Bacillaceae                            | Weighted mode             | 31 | 0.0021  | 0.2609 | 0.9935 | -0.0097 | 0.0222 | 0.6639 | 25.6873 | 0.6421 | 3.7409  |
| IschemicStroke | f_Bifidobacteriaceae                     | MR Egger                  | 31 | 0.0008  | 0.4361 | 0.9985 | -0.0047 | 0.0312 | 0.8819 | 22.8314 | 0.7842 | 4.0873  |
| IschemicStroke | f_Bifidobacteriaceae                     | Weighted median           | 31 | 0.1812  | 0.2334 | 0.4375 | -0.0047 | 0.0312 | 0.8819 | 22.8314 | 0.7842 | 4.0873  |
| IschemicStroke | f_Bifidobacteriaceae                     | Inverse variance weighted | 31 | -0.0599 | 0.1620 | 0.7116 | -0.0047 | 0.0312 | 0.8819 | 22.8314 | 0.7842 | 4.0873  |
| IschemicStroke | f_Bifidobacteriaceae                     | Simple mode               | 31 | 0.1575  | 0.4244 | 0.7132 | -0.0047 | 0.0312 | 0.8819 | 22.8314 | 0.7842 | 4.0873  |
| IschemicStroke | f_Bifidobacteriaceae                     | Weighted mode             | 31 | 0.2323  | 0.3341 | 0.4921 | -0.0047 | 0.0312 | 0.8819 | 22.8314 | 0.7842 | 4.0873  |
| IschemicStroke | f_Burkholderiaceae                       | MR Egger                  | 31 | 0.3478  | 0.4908 | 0.4842 | 0.0109  | 0.0351 | 0.7590 | 32.9983 | 0.2778 | 1.6995  |
| IschemicStroke | f_Burkholderiaceae                       | Weighted median           | 31 | 0.5345  | 0.2548 | 0.0359 | 0.0109  | 0.0351 | 0.7590 | 32.9983 | 0.2778 | 1.6995  |
| IschemicStroke | f_Burkholderiaceae                       | Inverse variance weighted | 31 | 0.4888  | 0.1796 | 0.0065 | 0.0109  | 0.0351 | 0.7590 | 32.9983 | 0.2778 | 1.6995  |
| IschemicStroke | f_Burkholderiaceae                       | Simple mode               | 31 | 0.5109  | 0.5071 | 0.3217 | 0.0109  | 0.0351 | 0.7590 | 32.9983 | 0.2778 | 1.6995  |
| IschemicStroke | f_Burkholderiaceae                       | Weighted mode             | 31 | 0.6509  | 0.4285 | 0.1392 | 0.0109  | 0.0351 | 0.7590 | 32.9983 | 0.2778 | 1.6995  |
| IschemicStroke | f_Clostridiales_Family_XI_Incertae_Sedis | MR Egger                  | 31 | 0.1633  | 0.4154 | 0.6972 | -0.0031 | 0.0297 | 0.9166 | 32.4018 | 0.3025 | 5.4735  |
| IschemicStroke | f_Clostridiales_Family_XI_Incertae_Sedis | Weighted median           | 31 | 0.1282  | 0.2097 | 0.5410 | -0.0031 | 0.0297 | 0.9166 | 32.4018 | 0.3025 | 5.4735  |
| IschemicStroke | f_Clostridiales_Family_XI_Incertae_Sedis | Inverse variance weighted | 31 | 0.1225  | 0.1518 | 0.4196 | -0.0031 | 0.0297 | 0.9166 | 32.4018 | 0.3025 | 5.4735  |
| IschemicStroke | f_Clostridiales_Family_XI_Incertae_Sedis | Simple mode               | 31 | 0.2079  | 0.4705 | 0.6618 | -0.0031 | 0.0297 | 0.9166 | 32.4018 | 0.3025 | 5.4735  |
| IschemicStroke | f_Clostridiales_Family_XI_Incertae_Sedis | Weighted mode             | 31 | 0.1365  | 0.3933 | 0.7310 | -0.0031 | 0.0297 | 0.9166 | 32.4018 | 0.3025 | 5.4735  |
| IschemicStroke | f_Coriobacteriaceae                      | MR Egger                  | 31 | 0.3914  | 0.4374 | 0.3783 | -0.0141 | 0.0313 | 0.6552 | 45.5026 | 0.0263 | 1.6135  |
| IschemicStroke | f_Coriobacteriaceae                      | Weighted median           | 31 | 0.0962  | 0.2024 | 0.6347 | -0.0141 | 0.0313 | 0.6552 | 45.5026 | 0.0263 | 1.6135  |
| IschemicStroke | f_Coriobacteriaceae                      | Inverse variance weighted | 31 | 0.2081  | 0.1604 | 0.1944 | -0.0141 | 0.0313 | 0.6552 | 45.5026 | 0.0263 | 1.6135  |
| IschemicStroke | f_Coriobacteriaceae                      | Simple mode               | 31 | -0.0532 | 0.4369 | 0.9039 | -0.0141 | 0.0313 | 0.6552 | 45.5026 | 0.0263 | 1.6135  |
| IschemicStroke | f_Coriobacteriaceae                      | Weighted mode             | 31 | 0.0660  | 0.3200 | 0.8379 | -0.0141 | 0.0313 | 0.6552 | 45.5026 | 0.0263 | 1.6135  |
| IschemicStroke | f_Enterobacteriaceae                     | MR Egger                  | 31 | -0.2731 | 0.5625 | 0.6310 | 0.0187  | 0.0403 | 0.6468 | 41.7175 | 0.0595 | 2.6805  |
| IschemicStroke | f_Enterobacteriaceae                     | Weighted median           | 31 | 0.0781  | 0.2728 | 0.7746 | 0.0187  | 0.0403 | 0.6468 | 41.7175 | 0.0595 | 2.6805  |

|                |                         |                           |    |         |        |        |         |        |        |         |        |         |
|----------------|-------------------------|---------------------------|----|---------|--------|--------|---------|--------|--------|---------|--------|---------|
| IschemicStroke | f_Enterobacteriaceae    | Inverse variance weighted | 31 | -0.0313 | 0.2062 | 0.8795 | 0.0187  | 0.0403 | 0.6468 | 41.7175 | 0.0595 | 2.6805  |
| IschemicStroke | f_Enterobacteriaceae    | Simple mode               | 31 | 0.2595  | 0.5153 | 0.6183 | 0.0187  | 0.0403 | 0.6468 | 41.7175 | 0.0595 | 2.6805  |
| IschemicStroke | f_Enterobacteriaceae    | Weighted mode             | 31 | 0.1006  | 0.3731 | 0.7894 | 0.0187  | 0.0403 | 0.6468 | 41.7175 | 0.0595 | 2.6805  |
| IschemicStroke | f_Eubacteriaceae        | MR Egger                  | 31 | 0.4236  | 0.3140 | 0.1878 | -0.0290 | 0.0225 | 0.2068 | 25.6884 | 0.6909 | 8.7240  |
| IschemicStroke | f_Eubacteriaceae        | Weighted median           | 31 | -0.0135 | 0.1687 | 0.9364 | -0.0290 | 0.0225 | 0.2068 | 25.6884 | 0.6909 | 8.7240  |
| IschemicStroke | f_Eubacteriaceae        | Inverse variance weighted | 31 | 0.0472  | 0.1167 | 0.6857 | -0.0290 | 0.0225 | 0.2068 | 25.6884 | 0.6909 | 8.7240  |
| IschemicStroke | f_Eubacteriaceae        | Simple mode               | 31 | -0.2216 | 0.3566 | 0.5390 | -0.0290 | 0.0225 | 0.2068 | 25.6884 | 0.6909 | 8.7240  |
| IschemicStroke | f_Eubacteriaceae        | Weighted mode             | 31 | -0.1555 | 0.3034 | 0.6121 | -0.0290 | 0.0225 | 0.2068 | 25.6884 | 0.6909 | 8.7240  |
| IschemicStroke | f_Lachnospiraceae       | MR Egger                  | 31 | 0.3535  | 0.1993 | 0.0867 | -0.0224 | 0.0143 | 0.1270 | 19.5809 | 0.9270 | 37.2882 |
| IschemicStroke | f_Lachnospiraceae       | Weighted median           | 31 | 0.1311  | 0.1063 | 0.2175 | -0.0224 | 0.0143 | 0.1270 | 19.5809 | 0.9270 | 37.2882 |
| IschemicStroke | f_Lachnospiraceae       | Inverse variance weighted | 31 | 0.0627  | 0.0741 | 0.3973 | -0.0224 | 0.0143 | 0.1270 | 19.5809 | 0.9270 | 37.2882 |
| IschemicStroke | f_Lachnospiraceae       | Simple mode               | 31 | 0.1511  | 0.2263 | 0.5095 | -0.0224 | 0.0143 | 0.1270 | 19.5809 | 0.9270 | 37.2882 |
| IschemicStroke | f_Lachnospiraceae       | Weighted mode             | 31 | 0.2023  | 0.1735 | 0.2528 | -0.0224 | 0.0143 | 0.1270 | 19.5809 | 0.9270 | 37.2882 |
| IschemicStroke | f_Lactobacillaceae      | MR Egger                  | 31 | 0.3084  | 0.3772 | 0.4203 | -0.0200 | 0.0270 | 0.4640 | 31.5846 | 0.3384 | 2.3705  |
| IschemicStroke | f_Lactobacillaceae      | Weighted median           | 31 | -0.2078 | 0.1980 | 0.2940 | -0.0200 | 0.0270 | 0.4640 | 31.5846 | 0.3384 | 2.3705  |
| IschemicStroke | f_Lactobacillaceae      | Inverse variance weighted | 31 | 0.0485  | 0.1392 | 0.7274 | -0.0200 | 0.0270 | 0.4640 | 31.5846 | 0.3384 | 2.3705  |
| IschemicStroke | f_Lactobacillaceae      | Simple mode               | 31 | -0.3428 | 0.4244 | 0.4256 | -0.0200 | 0.0270 | 0.4640 | 31.5846 | 0.3384 | 2.3705  |
| IschemicStroke | f_Lactobacillaceae      | Weighted mode             | 31 | -0.3328 | 0.3579 | 0.3599 | -0.0200 | 0.0270 | 0.4640 | 31.5846 | 0.3384 | 2.3705  |
| IschemicStroke | f_Leuconostocaceae      | MR Egger                  | 31 | 0.1850  | 0.5287 | 0.7289 | 0.0061  | 0.0379 | 0.8729 | 27.5592 | 0.5416 | 1.9797  |
| IschemicStroke | f_Leuconostocaceae      | Weighted median           | 31 | 0.2983  | 0.2876 | 0.2997 | 0.0061  | 0.0379 | 0.8729 | 27.5592 | 0.5416 | 1.9797  |
| IschemicStroke | f_Leuconostocaceae      | Inverse variance weighted | 31 | 0.2642  | 0.1965 | 0.1786 | 0.0061  | 0.0379 | 0.8729 | 27.5592 | 0.5416 | 1.9797  |
| IschemicStroke | f_Leuconostocaceae      | Simple mode               | 31 | 0.4643  | 0.6337 | 0.4695 | 0.0061  | 0.0379 | 0.8729 | 27.5592 | 0.5416 | 1.9797  |
| IschemicStroke | f_Leuconostocaceae      | Weighted mode             | 31 | 0.6321  | 0.5475 | 0.2574 | 0.0061  | 0.0379 | 0.8729 | 27.5592 | 0.5416 | 1.9797  |
| IschemicStroke | f_Neisseriaceae         | MR Egger                  | 31 | -1.0723 | 0.5087 | 0.0438 | 0.0507  | 0.0364 | 0.1745 | 24.8114 | 0.7341 | 1.6352  |
| IschemicStroke | f_Neisseriaceae         | Weighted median           | 31 | -0.6000 | 0.2705 | 0.0265 | 0.0507  | 0.0364 | 0.1745 | 24.8114 | 0.7341 | 1.6352  |
| IschemicStroke | f_Neisseriaceae         | Inverse variance weighted | 31 | -0.4149 | 0.1890 | 0.0282 | 0.0507  | 0.0364 | 0.1745 | 24.8114 | 0.7341 | 1.6352  |
| IschemicStroke | f_Neisseriaceae         | Simple mode               | 31 | -0.5284 | 0.5126 | 0.3108 | 0.0507  | 0.0364 | 0.1745 | 24.8114 | 0.7341 | 1.6352  |
| IschemicStroke | f_Neisseriaceae         | Weighted mode             | 31 | -0.5678 | 0.4132 | 0.1795 | 0.0507  | 0.0364 | 0.1745 | 24.8114 | 0.7341 | 1.6352  |
| IschemicStroke | f_Peptostreptococcaceae | MR Egger                  | 31 | 0.7174  | 0.4135 | 0.0934 | -0.0386 | 0.0296 | 0.2023 | 37.4796 | 0.1636 | 2.0870  |
| IschemicStroke | f_Peptostreptococcaceae | Weighted median           | 31 | 0.0703  | 0.2229 | 0.7524 | -0.0386 | 0.0296 | 0.2023 | 37.4796 | 0.1636 | 2.0870  |
| IschemicStroke | f_Peptostreptococcaceae | Inverse variance weighted | 31 | 0.2165  | 0.1554 | 0.1636 | -0.0386 | 0.0296 | 0.2023 | 37.4796 | 0.1636 | 2.0870  |
| IschemicStroke | f_Peptostreptococcaceae | Simple mode               | 31 | 0.1461  | 0.4187 | 0.7297 | -0.0386 | 0.0296 | 0.2023 | 37.4796 | 0.1636 | 2.0870  |
| IschemicStroke | f_Peptostreptococcaceae | Weighted mode             | 31 | 0.1325  | 0.3500 | 0.7076 | -0.0386 | 0.0296 | 0.2023 | 37.4796 | 0.1636 | 2.0870  |
| IschemicStroke | f_Porphyromonadaceae    | MR Egger                  | 31 | 0.0704  | 0.2136 | 0.7442 | 0.0012  | 0.0153 | 0.9390 | 27.5572 | 0.5417 | 18.1075 |
| IschemicStroke | f_Porphyromonadaceae    | Weighted median           | 31 | 0.0459  | 0.1178 | 0.6967 | 0.0012  | 0.0153 | 0.9390 | 27.5572 | 0.5417 | 18.1075 |
| IschemicStroke | f_Porphyromonadaceae    | Inverse variance weighted | 31 | 0.0857  | 0.0794 | 0.2804 | 0.0012  | 0.0153 | 0.9390 | 27.5572 | 0.5417 | 18.1075 |
| IschemicStroke | f_Porphyromonadaceae    | Simple mode               | 31 | 0.1196  | 0.2097 | 0.5726 | 0.0012  | 0.0153 | 0.9390 | 27.5572 | 0.5417 | 18.1075 |
| IschemicStroke | f_Porphyromonadaceae    | Weighted mode             | 31 | 0.0536  | 0.1616 | 0.7424 | 0.0012  | 0.0153 | 0.9390 | 27.5572 | 0.5417 | 18.1075 |
| IschemicStroke | f_Prevotellaceae        | MR Egger                  | 31 | -0.2820 | 0.6690 | 0.6764 | 0.0185  | 0.0479 | 0.7019 | 26.2129 | 0.6141 | 1.1873  |
| IschemicStroke | f_Prevotellaceae        | Weighted median           | 31 | -0.2671 | 0.3696 | 0.4699 | 0.0185  | 0.0479 | 0.7019 | 26.2129 | 0.6141 | 1.1873  |
| IschemicStroke | f_Prevotellaceae        | Inverse variance weighted | 31 | -0.0419 | 0.2486 | 0.8660 | 0.0185  | 0.0479 | 0.7019 | 26.2129 | 0.6141 | 1.1873  |
| IschemicStroke | f_Prevotellaceae        | Simple mode               | 31 | -0.1989 | 0.6736 | 0.7698 | 0.0185  | 0.0479 | 0.7019 | 26.2129 | 0.6141 | 1.1873  |
| IschemicStroke | f_Prevotellaceae        | Weighted mode             | 31 | -0.1989 | 0.5177 | 0.7035 | 0.0185  | 0.0479 | 0.7019 | 26.2129 | 0.6141 | 1.1873  |
| IschemicStroke | f_Staphylococcaceae     | MR Egger                  | 31 | 0.1180  | 0.5093 | 0.8184 | 0.0011  | 0.0365 | 0.9757 | 47.8249 | 0.0153 | 6.5960  |
| IschemicStroke | f_Staphylococcaceae     | Weighted median           | 31 | 0.2762  | 0.2242 | 0.2180 | 0.0011  | 0.0365 | 0.9757 | 47.8249 | 0.0153 | 6.5960  |
| IschemicStroke | f_Staphylococcaceae     | Inverse variance weighted | 31 | 0.1325  | 0.1861 | 0.4764 | 0.0011  | 0.0365 | 0.9757 | 47.8249 | 0.0153 | 6.5960  |
| IschemicStroke | f_Staphylococcaceae     | Simple mode               | 31 | 0.1385  | 0.4453 | 0.7580 | 0.0011  | 0.0365 | 0.9757 | 47.8249 | 0.0153 | 6.5960  |
| IschemicStroke | f_Staphylococcaceae     | Weighted mode             | 31 | 0.2526  | 0.3302 | 0.4502 | 0.0011  | 0.0365 | 0.9757 | 47.8249 | 0.0153 | 6.5960  |
| IschemicStroke | f_Streptococcaceae      | MR Egger                  | 31 | -0.4988 | 0.3048 | 0.1126 | 0.0120  | 0.0218 | 0.5863 | 28.8176 | 0.4746 | 2.6908  |
| IschemicStroke | f_Streptococcaceae      | Weighted median           | 31 | -0.2542 | 0.1711 | 0.1374 | 0.0120  | 0.0218 | 0.5863 | 28.8176 | 0.4746 | 2.6908  |
| IschemicStroke | f_Streptococcaceae      | Inverse variance weighted | 31 | -0.3430 | 0.1133 | 0.0025 | 0.0120  | 0.0218 | 0.5863 | 28.8176 | 0.4746 | 2.6908  |
| IschemicStroke | f_Streptococcaceae      | Simple mode               | 31 | -0.1251 | 0.3338 | 0.7104 | 0.0120  | 0.0218 | 0.5863 | 28.8176 | 0.4746 | 2.6908  |
| IschemicStroke | f_Streptococcaceae      | Weighted mode             | 31 | -0.1504 | 0.2599 | 0.5671 | 0.0120  | 0.0218 | 0.5863 | 28.8176 | 0.4746 | 2.6908  |
| IschemicStroke | f_Sutterellaceae        | MR Egger                  | 31 | 1.7765  | 0.5884 | 0.0052 | -0.1081 | 0.0421 | 0.0158 | 33.5522 | 0.2991 | 15.0328 |
| IschemicStroke | f_Sutterellaceae        | Weighted median           | 31 | 0.3776  | 0.3330 | 0.2569 | -0.1081 | 0.0421 | 0.0158 | 33.5522 | 0.2991 | 15.0328 |
| IschemicStroke | f_Sutterellaceae        | Inverse variance weighted | 31 | 0.3753  | 0.2314 | 0.1048 | -0.1081 | 0.0421 | 0.0158 | 33.5522 | 0.2991 | 15.0328 |
| IschemicStroke | f_Sutterellaceae        | Simple mode               | 31 | 0.0116  | 0.7500 | 0.9878 | -0.1081 | 0.0421 | 0.0158 | 33.5522 | 0.2991 | 15.0328 |
| IschemicStroke | f_Sutterellaceae        | Weighted mode             | 31 | 0.0912  | 0.5779 | 0.8757 | -0.1081 | 0.0421 | 0.0158 | 33.5522 | 0.2991 | 15.0328 |
| IschemicStroke | f_Veillonellaceae       | MR Egger                  | 31 | -0.1151 | 0.4230 | 0.7875 | -0.0048 | 0.0303 | 0.8757 | 21.0491 | 0.8574 | 4.6489  |
| IschemicStroke | f_Veillonellaceae       | Weighted median           | 31 | -0.3911 | 0.2289 | 0.0875 | -0.0048 | 0.0303 | 0.8757 | 21.0491 | 0.8574 | 4.6489  |
| IschemicStroke | f_Veillonellaceae       | Inverse variance weighted | 31 | -0.1770 | 0.1572 | 0.2601 | -0.0048 | 0.0303 | 0.8757 | 21.0491 | 0.8574 | 4.6489  |

|                |                   |                           |    |         |        |        |         |        |        |         |        |         |
|----------------|-------------------|---------------------------|----|---------|--------|--------|---------|--------|--------|---------|--------|---------|
| IschemicStroke | f_Veillonellaceae | Simple mode               | 31 | -0.5901 | 0.4283 | 0.1785 | -0.0048 | 0.0303 | 0.8757 | 21.0491 | 0.8574 | 4.6489  |
| IschemicStroke | f_Veillonellaceae | Weighted mode             | 31 | -0.5387 | 0.3813 | 0.1681 | -0.0048 | 0.0303 | 0.8757 | 21.0491 | 0.8574 | 4.6489  |
| IschemicStroke | g_Abiotrophia     | MR Egger                  | 31 | 0.6042  | 0.4348 | 0.1752 | -0.0297 | 0.0311 | 0.3476 | 34.1812 | 0.2327 | 1.7647  |
| IschemicStroke | g_Abiotrophia     | Weighted median           | 31 | 0.3371  | 0.2191 | 0.1240 | -0.0297 | 0.0311 | 0.3476 | 34.1812 | 0.2327 | 1.7647  |
| IschemicStroke | g_Abiotrophia     | Inverse variance weighted | 31 | 0.2189  | 0.1613 | 0.1748 | -0.0297 | 0.0311 | 0.3476 | 34.1812 | 0.2327 | 1.7647  |
| IschemicStroke | g_Abiotrophia     | Simple mode               | 31 | 0.3298  | 0.4122 | 0.4300 | -0.0297 | 0.0311 | 0.3476 | 34.1812 | 0.2327 | 1.7647  |
| IschemicStroke | g_Abiotrophia     | Weighted mode             | 31 | 0.3860  | 0.3097 | 0.2222 | -0.0297 | 0.0311 | 0.3476 | 34.1812 | 0.2327 | 1.7647  |
| IschemicStroke | g_Acidaminococcus | MR Egger                  | 31 | 0.5778  | 0.5014 | 0.2586 | -0.0274 | 0.0359 | 0.4511 | 33.0128 | 0.2772 | 1.3436  |
| IschemicStroke | g_Acidaminococcus | Weighted median           | 31 | 0.2064  | 0.2496 | 0.4082 | -0.0274 | 0.0359 | 0.4511 | 33.0128 | 0.2772 | 1.3436  |
| IschemicStroke | g_Acidaminococcus | Inverse variance weighted | 31 | 0.2223  | 0.1850 | 0.2296 | -0.0274 | 0.0359 | 0.4511 | 33.0128 | 0.2772 | 1.3436  |
| IschemicStroke | g_Acidaminococcus | Simple mode               | 31 | -0.1548 | 0.4662 | 0.7422 | -0.0274 | 0.0359 | 0.4511 | 33.0128 | 0.2772 | 1.3436  |
| IschemicStroke | g_Acidaminococcus | Weighted mode             | 31 | 0.1372  | 0.3684 | 0.7123 | -0.0274 | 0.0359 | 0.4511 | 33.0128 | 0.2772 | 1.3436  |
| IschemicStroke | g_Actinomyces     | MR Egger                  | 31 | -0.0664 | 0.3197 | 0.8370 | -0.0057 | 0.0229 | 0.8045 | 20.5757 | 0.8741 | 8.4775  |
| IschemicStroke | g_Actinomyces     | Weighted median           | 31 | -0.1146 | 0.1714 | 0.5035 | -0.0057 | 0.0229 | 0.8045 | 20.5757 | 0.8741 | 8.4775  |
| IschemicStroke | g_Actinomyces     | Inverse variance weighted | 31 | -0.1405 | 0.1188 | 0.2369 | -0.0057 | 0.0229 | 0.8045 | 20.5757 | 0.8741 | 8.4775  |
| IschemicStroke | g_Actinomyces     | Simple mode               | 31 | 0.0952  | 0.3433 | 0.7835 | -0.0057 | 0.0229 | 0.8045 | 20.5757 | 0.8741 | 8.4775  |
| IschemicStroke | g_Actinomyces     | Weighted mode             | 31 | 0.1275  | 0.3033 | 0.6770 | -0.0057 | 0.0229 | 0.8045 | 20.5757 | 0.8741 | 8.4775  |
| IschemicStroke | g_Aggregatibacter | MR Egger                  | 31 | -0.6447 | 0.5646 | 0.2629 | 0.0272  | 0.0404 | 0.5064 | 24.2054 | 0.7187 | 1.4792  |
| IschemicStroke | g_Aggregatibacter | Weighted median           | 31 | -0.1891 | 0.3128 | 0.5455 | 0.0272  | 0.0404 | 0.5064 | 24.2054 | 0.7187 | 1.4792  |
| IschemicStroke | g_Aggregatibacter | Inverse variance weighted | 31 | -0.2920 | 0.2098 | 0.1640 | 0.0272  | 0.0404 | 0.5064 | 24.2054 | 0.7187 | 1.4792  |
| IschemicStroke | g_Aggregatibacter | Simple mode               | 31 | 0.3853  | 0.6410 | 0.5523 | 0.0272  | 0.0404 | 0.5064 | 24.2054 | 0.7187 | 1.4792  |
| IschemicStroke | g_Aggregatibacter | Weighted mode             | 31 | 0.0142  | 0.4532 | 0.9751 | 0.0272  | 0.0404 | 0.5064 | 24.2054 | 0.7187 | 1.4792  |
| IschemicStroke | g_Alistipes       | MR Egger                  | 31 | 0.5491  | 0.4527 | 0.2350 | -0.0146 | 0.0324 | 0.6557 | 30.4192 | 0.3933 | 1.5902  |
| IschemicStroke | g_Alistipes       | Weighted median           | 31 | 0.3514  | 0.2496 | 0.1592 | -0.0146 | 0.0324 | 0.6557 | 30.4192 | 0.3933 | 1.5902  |
| IschemicStroke | g_Alistipes       | Inverse variance weighted | 31 | 0.3598  | 0.1660 | 0.0302 | -0.0146 | 0.0324 | 0.6557 | 30.4192 | 0.3933 | 1.5902  |
| IschemicStroke | g_Alistipes       | Simple mode               | 31 | 0.5692  | 0.4964 | 0.2606 | -0.0146 | 0.0324 | 0.6557 | 30.4192 | 0.3933 | 1.5902  |
| IschemicStroke | g_Alistipes       | Weighted mode             | 31 | 0.4496  | 0.3879 | 0.2556 | -0.0146 | 0.0324 | 0.6557 | 30.4192 | 0.3933 | 1.5902  |
| IschemicStroke | g_Anaerococcus    | MR Egger                  | 31 | 0.0773  | 0.5251 | 0.8839 | 0.0083  | 0.0376 | 0.8258 | 35.9805 | 0.1741 | 1.4860  |
| IschemicStroke | g_Anaerococcus    | Weighted median           | 31 | 0.2346  | 0.2580 | 0.3633 | 0.0083  | 0.0376 | 0.8258 | 35.9805 | 0.1741 | 1.4860  |
| IschemicStroke | g_Anaerococcus    | Inverse variance weighted | 31 | 0.1856  | 0.1920 | 0.3338 | 0.0083  | 0.0376 | 0.8258 | 35.9805 | 0.1741 | 1.4860  |
| IschemicStroke | g_Anaerococcus    | Simple mode               | 31 | 0.3146  | 0.5154 | 0.5461 | 0.0083  | 0.0376 | 0.8258 | 35.9805 | 0.1741 | 1.4860  |
| IschemicStroke | g_Anaerococcus    | Weighted mode             | 31 | 0.2059  | 0.4205 | 0.6280 | 0.0083  | 0.0376 | 0.8258 | 35.9805 | 0.1741 | 1.4860  |
| IschemicStroke | g_Anaerofustis    | MR Egger                  | 31 | 0.4567  | 0.2848 | 0.1196 | -0.0302 | 0.0204 | 0.1493 | 22.1795 | 0.8474 | 12.9365 |
| IschemicStroke | g_Anaerofustis    | Weighted median           | 31 | 0.0921  | 0.1576 | 0.5590 | -0.0302 | 0.0204 | 0.1493 | 22.1795 | 0.8474 | 12.9365 |
| IschemicStroke | g_Anaerofustis    | Inverse variance weighted | 31 | 0.0650  | 0.1058 | 0.5388 | -0.0302 | 0.0204 | 0.1493 | 22.1795 | 0.8474 | 12.9365 |
| IschemicStroke | g_Anaerofustis    | Simple mode               | 31 | 0.0760  | 0.2830 | 0.7901 | -0.0302 | 0.0204 | 0.1493 | 22.1795 | 0.8474 | 12.9365 |
| IschemicStroke | g_Anaerofustis    | Weighted mode             | 31 | 0.1114  | 0.2188 | 0.6144 | -0.0302 | 0.0204 | 0.1493 | 22.1795 | 0.8474 | 12.9365 |
| IschemicStroke | g_Anaerostipes    | MR Egger                  | 31 | -0.1841 | 0.2572 | 0.4798 | 0.0154  | 0.0184 | 0.4090 | 25.3743 | 0.6587 | 21.5049 |
| IschemicStroke | g_Anaerostipes    | Weighted median           | 31 | -0.0858 | 0.1380 | 0.5342 | 0.0154  | 0.0184 | 0.4090 | 25.3743 | 0.6587 | 21.5049 |
| IschemicStroke | g_Anaerostipes    | Inverse variance weighted | 31 | 0.0160  | 0.0956 | 0.8673 | 0.0154  | 0.0184 | 0.4090 | 25.3743 | 0.6587 | 21.5049 |
| IschemicStroke | g_Anaerostipes    | Simple mode               | 31 | 0.3737  | 0.2641 | 0.1674 | 0.0154  | 0.0184 | 0.4090 | 25.3743 | 0.6587 | 21.5049 |
| IschemicStroke | g_Anaerostipes    | Weighted mode             | 31 | -0.1870 | 0.2165 | 0.3947 | 0.0154  | 0.0184 | 0.4090 | 25.3743 | 0.6587 | 21.5049 |
| IschemicStroke | g_Anaerotruncus   | MR Egger                  | 31 | 0.1041  | 0.2269 | 0.6496 | -0.0043 | 0.0162 | 0.7926 | 23.6858 | 0.7443 | 14.9286 |
| IschemicStroke | g_Anaerotruncus   | Weighted median           | 31 | 0.0196  | 0.1225 | 0.8727 | -0.0043 | 0.0162 | 0.7926 | 23.6858 | 0.7443 | 14.9286 |
| IschemicStroke | g_Anaerotruncus   | Inverse variance weighted | 31 | 0.0482  | 0.0843 | 0.5673 | -0.0043 | 0.0162 | 0.7926 | 23.6858 | 0.7443 | 14.9286 |
| IschemicStroke | g_Anaerotruncus   | Simple mode               | 31 | -0.0196 | 0.2343 | 0.9340 | -0.0043 | 0.0162 | 0.7926 | 23.6858 | 0.7443 | 14.9286 |
| IschemicStroke | g_Anaerotruncus   | Weighted mode             | 31 | 0.2964  | 0.2231 | 0.1940 | -0.0043 | 0.0162 | 0.7926 | 23.6858 | 0.7443 | 14.9286 |
| IschemicStroke | g_Atopobium       | MR Egger                  | 31 | 0.1381  | 0.2703 | 0.6133 | -0.0132 | 0.0194 | 0.5000 | 21.6355 | 0.8350 | 11.9383 |
| IschemicStroke | g_Atopobium       | Weighted median           | 31 | -0.0719 | 0.1477 | 0.6263 | -0.0132 | 0.0194 | 0.5000 | 21.6355 | 0.8350 | 11.9383 |
| IschemicStroke | g_Atopobium       | Inverse variance weighted | 31 | -0.0333 | 0.1004 | 0.7403 | -0.0132 | 0.0194 | 0.5000 | 21.6355 | 0.8350 | 11.9383 |
| IschemicStroke | g_Atopobium       | Simple mode               | 31 | -0.0788 | 0.2647 | 0.7681 | -0.0132 | 0.0194 | 0.5000 | 21.6355 | 0.8350 | 11.9383 |
| IschemicStroke | g_Atopobium       | Weighted mode             | 31 | -0.0495 | 0.2178 | 0.8218 | -0.0132 | 0.0194 | 0.5000 | 21.6355 | 0.8350 | 11.9383 |
| IschemicStroke | g_Bacteroides     | MR Egger                  | 31 | -0.0549 | 0.2351 | 0.8170 | 0.0130  | 0.0168 | 0.4459 | 30.4792 | 0.3904 | 22.4981 |
| IschemicStroke | g_Bacteroides     | Weighted median           | 31 | 0.0479  | 0.1227 | 0.6961 | 0.0130  | 0.0168 | 0.4459 | 30.4792 | 0.3904 | 22.4981 |
| IschemicStroke | g_Bacteroides     | Inverse variance weighted | 31 | 0.1138  | 0.0867 | 0.1896 | 0.0130  | 0.0168 | 0.4459 | 30.4792 | 0.3904 | 22.4981 |
| IschemicStroke | g_Bacteroides     | Simple mode               | 31 | 0.2840  | 0.2242 | 0.2151 | 0.0130  | 0.0168 | 0.4459 | 30.4792 | 0.3904 | 22.4981 |
| IschemicStroke | g_Bacteroides     | Weighted mode             | 31 | 0.0721  | 0.1702 | 0.6749 | 0.0130  | 0.0168 | 0.4459 | 30.4792 | 0.3904 | 22.4981 |
| IschemicStroke | g_Blautia         | MR Egger                  | 31 | 0.2660  | 0.2006 | 0.1951 | -0.0186 | 0.0144 | 0.2044 | 23.9781 | 0.7730 | 32.1479 |
| IschemicStroke | g_Blautia         | Weighted median           | 31 | 0.1826  | 0.1067 | 0.0871 | -0.0186 | 0.0144 | 0.2044 | 23.9781 | 0.7730 | 32.1479 |
| IschemicStroke | g_Blautia         | Inverse variance weighted | 31 | 0.0243  | 0.0745 | 0.7446 | -0.0186 | 0.0144 | 0.2044 | 23.9781 | 0.7730 | 32.1479 |
| IschemicStroke | g_Blautia         | Simple mode               | 31 | 0.2675  | 0.2320 | 0.2580 | -0.0186 | 0.0144 | 0.2044 | 23.9781 | 0.7730 | 32.1479 |

|                |                    |                           |    |         |        |        |         |        |        |         |        |           |
|----------------|--------------------|---------------------------|----|---------|--------|--------|---------|--------|--------|---------|--------|-----------|
| IschemicStroke | g_Blautia          | Weighted mode             | 31 | 0.2726  | 0.1636 | 0.1061 | -0.0186 | 0.0144 | 0.2044 | 23.9781 | 0.7730 | 32.1479   |
| IschemicStroke | g_Citrobacter      | MR Egger                  | 31 | -0.2221 | 0.6369 | 0.7299 | 0.0165  | 0.0456 | 0.7196 | 35.3919 | 0.1920 | 54.9159   |
| IschemicStroke | g_Citrobacter      | Weighted median           | 31 | 0.1636  | 0.3321 | 0.6224 | 0.0165  | 0.0456 | 0.7196 | 35.3919 | 0.1920 | 54.9159   |
| IschemicStroke | g_Citrobacter      | Inverse variance weighted | 31 | -0.0077 | 0.2332 | 0.9736 | 0.0165  | 0.0456 | 0.7196 | 35.3919 | 0.1920 | 54.9159   |
| IschemicStroke | g_Citrobacter      | Simple mode               | 31 | 0.1011  | 0.6183 | 0.8711 | 0.0165  | 0.0456 | 0.7196 | 35.3919 | 0.1920 | 54.9159   |
| IschemicStroke | g_Citrobacter      | Weighted mode             | 31 | 0.2335  | 0.4775 | 0.6283 | 0.0165  | 0.0456 | 0.7196 | 35.3919 | 0.1920 | 54.9159   |
| IschemicStroke | g_Clostridium      | MR Egger                  | 31 | -0.0446 | 0.2355 | 0.8511 | 0.0057  | 0.0169 | 0.7388 | 41.2261 | 0.0658 | 23.3989   |
| IschemicStroke | g_Clostridium      | Weighted median           | 31 | -0.0247 | 0.1115 | 0.8243 | 0.0057  | 0.0169 | 0.7388 | 41.2261 | 0.0658 | 23.3989   |
| IschemicStroke | g_Clostridium      | Inverse variance weighted | 31 | 0.0290  | 0.0862 | 0.7365 | 0.0057  | 0.0169 | 0.7388 | 41.2261 | 0.0658 | 23.3989   |
| IschemicStroke | g_Clostridium      | Simple mode               | 31 | -0.0637 | 0.2055 | 0.7589 | 0.0057  | 0.0169 | 0.7388 | 41.2261 | 0.0658 | 23.3989   |
| IschemicStroke | g_Clostridium      | Weighted mode             | 31 | -0.0637 | 0.1470 | 0.6679 | 0.0057  | 0.0169 | 0.7388 | 41.2261 | 0.0658 | 23.3989   |
| IschemicStroke | g_Collinsella      | MR Egger                  | 31 | 0.6506  | 0.8028 | 0.4243 | -0.0234 | 0.0575 | 0.6869 | 48.2962 | 0.0137 | -234.8836 |
| IschemicStroke | g_Collinsella      | Weighted median           | 31 | 0.2780  | 0.3885 | 0.4743 | -0.0234 | 0.0575 | 0.6869 | 48.2962 | 0.0137 | -234.8836 |
| IschemicStroke | g_Collinsella      | Inverse variance weighted | 31 | 0.3472  | 0.2943 | 0.2381 | -0.0234 | 0.0575 | 0.6869 | 48.2962 | 0.0137 | -234.8836 |
| IschemicStroke | g_Collinsella      | Simple mode               | 31 | 1.7581  | 0.8609 | 0.0500 | -0.0234 | 0.0575 | 0.6869 | 48.2962 | 0.0137 | -234.8836 |
| IschemicStroke | g_Collinsella      | Weighted mode             | 31 | 0.2874  | 0.6216 | 0.6472 | -0.0234 | 0.0575 | 0.6869 | 48.2962 | 0.0137 | -234.8836 |
| IschemicStroke | g_Coprobacillus    | MR Egger                  | 31 | 0.2262  | 0.3102 | 0.4716 | -0.0031 | 0.0222 | 0.8887 | 18.0747 | 0.9427 | 19.2091   |
| IschemicStroke | g_Coprobacillus    | Weighted median           | 31 | 0.2657  | 0.1583 | 0.0932 | -0.0031 | 0.0222 | 0.8887 | 18.0747 | 0.9427 | 19.2091   |
| IschemicStroke | g_Coprobacillus    | Inverse variance weighted | 31 | 0.1856  | 0.1153 | 0.1074 | -0.0031 | 0.0222 | 0.8887 | 18.0747 | 0.9427 | 19.2091   |
| IschemicStroke | g_Coprobacillus    | Simple mode               | 31 | 0.0166  | 0.3103 | 0.9577 | -0.0031 | 0.0222 | 0.8887 | 18.0747 | 0.9427 | 19.2091   |
| IschemicStroke | g_Coprobacillus    | Weighted mode             | 31 | 0.2334  | 0.2267 | 0.3115 | -0.0031 | 0.0222 | 0.8887 | 18.0747 | 0.9427 | 19.2091   |
| IschemicStroke | g_Coprococcus      | MR Egger                  | 31 | 0.5554  | 0.2755 | 0.0531 | -0.0282 | 0.0197 | 0.1632 | 25.4567 | 0.7025 | 13.6934   |
| IschemicStroke | g_Coprococcus      | Weighted median           | 31 | 0.1559  | 0.1558 | 0.3172 | -0.0282 | 0.0197 | 0.1632 | 25.4567 | 0.7025 | 13.6934   |
| IschemicStroke | g_Coprococcus      | Inverse variance weighted | 31 | 0.1895  | 0.1024 | 0.0643 | -0.0282 | 0.0197 | 0.1632 | 25.4567 | 0.7025 | 13.6934   |
| IschemicStroke | g_Coprococcus      | Simple mode               | 31 | -0.1413 | 0.3344 | 0.6757 | -0.0282 | 0.0197 | 0.1632 | 25.4567 | 0.7025 | 13.6934   |
| IschemicStroke | g_Coprococcus      | Weighted mode             | 31 | -0.1477 | 0.2953 | 0.6205 | -0.0282 | 0.0197 | 0.1632 | 25.4567 | 0.7025 | 13.6934   |
| IschemicStroke | g_Desulfovibrio    | MR Egger                  | 31 | 1.4775  | 0.7057 | 0.0451 | -0.0937 | 0.0505 | 0.0739 | 30.3165 | 0.4495 | 37.3030   |
| IschemicStroke | g_Desulfovibrio    | Weighted median           | 31 | 0.3480  | 0.3723 | 0.3499 | -0.0937 | 0.0505 | 0.0739 | 30.3165 | 0.4495 | 37.3030   |
| IschemicStroke | g_Desulfovibrio    | Inverse variance weighted | 31 | 0.2627  | 0.2636 | 0.3189 | -0.0937 | 0.0505 | 0.0739 | 30.3165 | 0.4495 | 37.3030   |
| IschemicStroke | g_Desulfovibrio    | Simple mode               | 31 | -0.4635 | 0.7350 | 0.5331 | -0.0937 | 0.0505 | 0.0739 | 30.3165 | 0.4495 | 37.3030   |
| IschemicStroke | g_Desulfovibrio    | Weighted mode             | 31 | 0.4661  | 0.5592 | 0.4111 | -0.0937 | 0.0505 | 0.0739 | 30.3165 | 0.4495 | 37.3030   |
| IschemicStroke | g_Dorea            | MR Egger                  | 31 | 0.4497  | 0.2784 | 0.1171 | -0.0226 | 0.0199 | 0.2672 | 42.4800 | 0.0651 | 8.7839    |
| IschemicStroke | g_Dorea            | Weighted median           | 31 | 0.2419  | 0.1312 | 0.0653 | -0.0226 | 0.0199 | 0.2672 | 42.4800 | 0.0651 | 8.7839    |
| IschemicStroke | g_Dorea            | Inverse variance weighted | 31 | 0.1573  | 0.1039 | 0.1302 | -0.0226 | 0.0199 | 0.2672 | 42.4800 | 0.0651 | 8.7839    |
| IschemicStroke | g_Dorea            | Simple mode               | 31 | 0.1769  | 0.2420 | 0.4704 | -0.0226 | 0.0199 | 0.2672 | 42.4800 | 0.0651 | 8.7839    |
| IschemicStroke | g_Dorea            | Weighted mode             | 31 | 0.2839  | 0.1874 | 0.1403 | -0.0226 | 0.0199 | 0.2672 | 42.4800 | 0.0651 | 8.7839    |
| IschemicStroke | g_Enterobacter     | MR Egger                  | 31 | 0.3241  | 0.6356 | 0.6139 | -0.0445 | 0.0455 | 0.3361 | 27.9761 | 0.5192 | 1.6297    |
| IschemicStroke | g_Enterobacter     | Weighted median           | 31 | -0.3730 | 0.3568 | 0.2958 | -0.0445 | 0.0455 | 0.3361 | 27.9761 | 0.5192 | 1.6297    |
| IschemicStroke | g_Enterobacter     | Inverse variance weighted | 31 | -0.2531 | 0.2362 | 0.2839 | -0.0445 | 0.0455 | 0.3361 | 27.9761 | 0.5192 | 1.6297    |
| IschemicStroke | g_Enterobacter     | Simple mode               | 31 | -0.5150 | 0.7296 | 0.4858 | -0.0445 | 0.0455 | 0.3361 | 27.9761 | 0.5192 | 1.6297    |
| IschemicStroke | g_Enterobacter     | Weighted mode             | 31 | -0.2310 | 0.5754 | 0.6909 | -0.0445 | 0.0455 | 0.3361 | 27.9761 | 0.5192 | 1.6297    |
| IschemicStroke | g_Escherichia      | MR Egger                  | 31 | -0.3407 | 0.6079 | 0.5795 | 0.0303  | 0.0435 | 0.4917 | 44.9746 | 0.0296 | 5.6878    |
| IschemicStroke | g_Escherichia      | Weighted median           | 31 | 0.0708  | 0.2840 | 0.8031 | 0.0303  | 0.0435 | 0.4917 | 44.9746 | 0.0296 | 5.6878    |
| IschemicStroke | g_Escherichia      | Inverse variance weighted | 31 | 0.0523  | 0.2239 | 0.8153 | 0.0303  | 0.0435 | 0.4917 | 44.9746 | 0.0296 | 5.6878    |
| IschemicStroke | g_Escherichia      | Simple mode               | 31 | 0.4935  | 0.5332 | 0.3620 | 0.0303  | 0.0435 | 0.4917 | 44.9746 | 0.0296 | 5.6878    |
| IschemicStroke | g_Escherichia      | Weighted mode             | 31 | 0.1630  | 0.4079 | 0.6923 | 0.0303  | 0.0435 | 0.4917 | 44.9746 | 0.0296 | 5.6878    |
| IschemicStroke | g_Faecalibacterium | MR Egger                  | 31 | 0.0426  | 0.4023 | 0.9163 | -0.0023 | 0.0288 | 0.9375 | 36.0220 | 0.1729 | 1.7718    |
| IschemicStroke | g_Faecalibacterium | Weighted median           | 31 | -0.2218 | 0.1945 | 0.2540 | -0.0023 | 0.0288 | 0.9375 | 36.0220 | 0.1729 | 1.7718    |
| IschemicStroke | g_Faecalibacterium | Inverse variance weighted | 31 | 0.0131  | 0.1470 | 0.9291 | -0.0023 | 0.0288 | 0.9375 | 36.0220 | 0.1729 | 1.7718    |
| IschemicStroke | g_Faecalibacterium | Simple mode               | 31 | -0.3702 | 0.3773 | 0.3343 | -0.0023 | 0.0288 | 0.9375 | 36.0220 | 0.1729 | 1.7718    |
| IschemicStroke | g_Faecalibacterium | Weighted mode             | 31 | -0.3323 | 0.3464 | 0.3451 | -0.0023 | 0.0288 | 0.9375 | 36.0220 | 0.1729 | 1.7718    |
| IschemicStroke | g_Fusobacterium    | MR Egger                  | 31 | 0.0291  | 0.8788 | 0.9738 | 0.0082  | 0.0629 | 0.8978 | 35.5882 | 0.1859 | 15.2199   |
| IschemicStroke | g_Fusobacterium    | Weighted median           | 31 | 0.3581  | 0.4348 | 0.4102 | 0.0082  | 0.0629 | 0.8978 | 35.5882 | 0.1859 | 15.2199   |
| IschemicStroke | g_Fusobacterium    | Inverse variance weighted | 31 | 0.1348  | 0.3211 | 0.6746 | 0.0082  | 0.0629 | 0.8978 | 35.5882 | 0.1859 | 15.2199   |
| IschemicStroke | g_Fusobacterium    | Simple mode               | 31 | 0.8264  | 0.9386 | 0.3856 | 0.0082  | 0.0629 | 0.8978 | 35.5882 | 0.1859 | 15.2199   |
| IschemicStroke | g_Fusobacterium    | Weighted mode             | 31 | 0.4837  | 0.6828 | 0.4842 | 0.0082  | 0.0629 | 0.8978 | 35.5882 | 0.1859 | 15.2199   |
| IschemicStroke | g_Gemella          | MR Egger                  | 31 | -0.2158 | 0.3186 | 0.5036 | 0.0074  | 0.0228 | 0.7480 | 19.8398 | 0.8978 | 7.3970    |
| IschemicStroke | g_Gemella          | Weighted median           | 31 | -0.0273 | 0.1667 | 0.8699 | 0.0074  | 0.0228 | 0.7480 | 19.8398 | 0.8978 | 7.3970    |
| IschemicStroke | g_Gemella          | Inverse variance weighted | 31 | -0.1198 | 0.1184 | 0.3115 | 0.0074  | 0.0228 | 0.7480 | 19.8398 | 0.8978 | 7.3970    |
| IschemicStroke | g_Gemella          | Simple mode               | 31 | -0.0803 | 0.2848 | 0.7799 | 0.0074  | 0.0228 | 0.7480 | 19.8398 | 0.8978 | 7.3970    |
| IschemicStroke | g_Gemella          | Weighted mode             | 31 | -0.0192 | 0.2515 | 0.9396 | 0.0074  | 0.0228 | 0.7480 | 19.8398 | 0.8978 | 7.3970    |

|                |                   |                           |    |         |        |        |         |        |        |         |        |         |
|----------------|-------------------|---------------------------|----|---------|--------|--------|---------|--------|--------|---------|--------|---------|
| IschemicStroke | g_Granulicatella  | MR Egger                  | 31 | -0.2580 | 0.2799 | 0.3643 | 0.0028  | 0.0200 | 0.8910 | 25.2514 | 0.6651 | 8.5668  |
| IschemicStroke | g_Granulicatella  | Weighted median           | 31 | -0.1511 | 0.1460 | 0.3007 | 0.0028  | 0.0200 | 0.8910 | 25.2514 | 0.6651 | 8.5668  |
| IschemicStroke | g_Granulicatella  | Inverse variance weighted | 31 | -0.2221 | 0.1040 | 0.0327 | 0.0028  | 0.0200 | 0.8910 | 25.2514 | 0.6651 | 8.5668  |
| IschemicStroke | g_Granulicatella  | Simple mode               | 31 | -0.1775 | 0.2522 | 0.4872 | 0.0028  | 0.0200 | 0.8910 | 25.2514 | 0.6651 | 8.5668  |
| IschemicStroke | g_Granulicatella  | Weighted mode             | 31 | -0.1202 | 0.2130 | 0.5767 | 0.0028  | 0.0200 | 0.8910 | 25.2514 | 0.6651 | 8.5668  |
| IschemicStroke | g_Holdemania      | MR Egger                  | 31 | -0.2096 | 0.2441 | 0.3975 | 0.0211  | 0.0175 | 0.2364 | 30.6620 | 0.4322 | 16.3905 |
| IschemicStroke | g_Holdemania      | Weighted median           | 31 | 0.1411  | 0.1389 | 0.3097 | 0.0211  | 0.0175 | 0.2364 | 30.6620 | 0.4322 | 16.3905 |
| IschemicStroke | g_Holdemania      | Inverse variance weighted | 31 | 0.0644  | 0.0914 | 0.4812 | 0.0211  | 0.0175 | 0.2364 | 30.6620 | 0.4322 | 16.3905 |
| IschemicStroke | g_Holdemania      | Simple mode               | 31 | 0.1939  | 0.2481 | 0.4406 | 0.0211  | 0.0175 | 0.2364 | 30.6620 | 0.4322 | 16.3905 |
| IschemicStroke | g_Holdemania      | Weighted mode             | 31 | 0.1721  | 0.2138 | 0.4272 | 0.0211  | 0.0175 | 0.2364 | 30.6620 | 0.4322 | 16.3905 |
| IschemicStroke | g_Klebsiella      | MR Egger                  | 31 | 0.1204  | 0.6664 | 0.8579 | -0.0227 | 0.0477 | 0.6375 | 17.5246 | 0.9534 | 1.0002  |
| IschemicStroke | g_Klebsiella      | Weighted median           | 31 | -0.0179 | 0.3482 | 0.9590 | -0.0227 | 0.0477 | 0.6375 | 17.5246 | 0.9534 | 1.0002  |
| IschemicStroke | g_Klebsiella      | Inverse variance weighted | 31 | -0.1742 | 0.2476 | 0.4818 | -0.0227 | 0.0477 | 0.6375 | 17.5246 | 0.9534 | 1.0002  |
| IschemicStroke | g_Klebsiella      | Simple mode               | 31 | 0.0127  | 0.6653 | 0.9849 | -0.0227 | 0.0477 | 0.6375 | 17.5246 | 0.9534 | 1.0002  |
| IschemicStroke | g_Klebsiella      | Weighted mode             | 31 | 0.1635  | 0.5928 | 0.7846 | -0.0227 | 0.0477 | 0.6375 | 17.5246 | 0.9534 | 1.0002  |
| IschemicStroke | g_Lactococcus     | MR Egger                  | 31 | -0.0385 | 0.3971 | 0.9235 | 0.0006  | 0.0284 | 0.9843 | 20.4772 | 0.8775 | 4.0506  |
| IschemicStroke | g_Lactococcus     | Weighted median           | 31 | 0.1356  | 0.2138 | 0.5261 | 0.0006  | 0.0284 | 0.9843 | 20.4772 | 0.8775 | 4.0506  |
| IschemicStroke | g_Lactococcus     | Inverse variance weighted | 31 | -0.0312 | 0.1476 | 0.8328 | 0.0006  | 0.0284 | 0.9843 | 20.4772 | 0.8775 | 4.0506  |
| IschemicStroke | g_Lactococcus     | Simple mode               | 31 | 0.4145  | 0.3563 | 0.2538 | 0.0006  | 0.0284 | 0.9843 | 20.4772 | 0.8775 | 4.0506  |
| IschemicStroke | g_Lactococcus     | Weighted mode             | 31 | 0.3134  | 0.2894 | 0.2875 | 0.0006  | 0.0284 | 0.9843 | 20.4772 | 0.8775 | 4.0506  |
| IschemicStroke | g_Megasphaera     | MR Egger                  | 31 | 0.2195  | 0.4804 | 0.6511 | -0.0022 | 0.0344 | 0.9491 | 22.6438 | 0.7926 | 4.2832  |
| IschemicStroke | g_Megasphaera     | Weighted median           | 31 | 0.0343  | 0.2561 | 0.8935 | -0.0022 | 0.0344 | 0.9491 | 22.6438 | 0.7926 | 4.2832  |
| IschemicStroke | g_Megasphaera     | Inverse variance weighted | 31 | 0.1908  | 0.1785 | 0.2852 | -0.0022 | 0.0344 | 0.9491 | 22.6438 | 0.7926 | 4.2832  |
| IschemicStroke | g_Megasphaera     | Simple mode               | 31 | -0.0133 | 0.4953 | 0.9788 | -0.0022 | 0.0344 | 0.9491 | 22.6438 | 0.7926 | 4.2832  |
| IschemicStroke | g_Megasphaera     | Weighted mode             | 31 | -0.0761 | 0.4346 | 0.8621 | -0.0022 | 0.0344 | 0.9491 | 22.6438 | 0.7926 | 4.2832  |
| IschemicStroke | g_Mitsuokella     | MR Egger                  | 31 | 0.8159  | 0.5481 | 0.1474 | -0.0338 | 0.0393 | 0.3962 | 32.6475 | 0.2922 | 4.5701  |
| IschemicStroke | g_Mitsuokella     | Weighted median           | 31 | 0.5070  | 0.3033 | 0.0947 | -0.0338 | 0.0393 | 0.3962 | 32.6475 | 0.2922 | 4.5701  |
| IschemicStroke | g_Mitsuokella     | Inverse variance weighted | 31 | 0.3776  | 0.2029 | 0.0627 | -0.0338 | 0.0393 | 0.3962 | 32.6475 | 0.2922 | 4.5701  |
| IschemicStroke | g_Mitsuokella     | Simple mode               | 31 | 0.6517  | 0.5446 | 0.2408 | -0.0338 | 0.0393 | 0.3962 | 32.6475 | 0.2922 | 4.5701  |
| IschemicStroke | g_Mitsuokella     | Weighted mode             | 31 | 0.6168  | 0.4589 | 0.1891 | -0.0338 | 0.0393 | 0.3962 | 32.6475 | 0.2922 | 4.5701  |
| IschemicStroke | g_Mobiluncus      | MR Egger                  | 31 | 0.3472  | 0.3245 | 0.2935 | -0.0166 | 0.0232 | 0.4803 | 22.4050 | 0.8030 | 9.4110  |
| IschemicStroke | g_Mobiluncus      | Weighted median           | 31 | 0.1926  | 0.1738 | 0.2679 | -0.0166 | 0.0232 | 0.4803 | 22.4050 | 0.8030 | 9.4110  |
| IschemicStroke | g_Mobiluncus      | Inverse variance weighted | 31 | 0.1318  | 0.1206 | 0.2744 | -0.0166 | 0.0232 | 0.4803 | 22.4050 | 0.8030 | 9.4110  |
| IschemicStroke | g_Mobiluncus      | Simple mode               | 31 | 0.1629  | 0.3332 | 0.6284 | -0.0166 | 0.0232 | 0.4803 | 22.4050 | 0.8030 | 9.4110  |
| IschemicStroke | g_Mobiluncus      | Weighted mode             | 31 | 0.2792  | 0.2652 | 0.3008 | -0.0166 | 0.0232 | 0.4803 | 22.4050 | 0.8030 | 9.4110  |
| IschemicStroke | g_Odoribacter     | MR Egger                  | 31 | 0.2348  | 0.3899 | 0.5518 | -0.0051 | 0.0279 | 0.8568 | 32.1467 | 0.3135 | 3.5171  |
| IschemicStroke | g_Odoribacter     | Weighted median           | 31 | 0.1974  | 0.2050 | 0.3354 | -0.0051 | 0.0279 | 0.8568 | 32.1467 | 0.3135 | 3.5171  |
| IschemicStroke | g_Odoribacter     | Inverse variance weighted | 31 | 0.1688  | 0.1425 | 0.2361 | -0.0051 | 0.0279 | 0.8568 | 32.1467 | 0.3135 | 3.5171  |
| IschemicStroke | g_Odoribacter     | Simple mode               | 31 | 0.3550  | 0.3865 | 0.3657 | -0.0051 | 0.0279 | 0.8568 | 32.1467 | 0.3135 | 3.5171  |
| IschemicStroke | g_Odoribacter     | Weighted mode             | 31 | 0.2824  | 0.2997 | 0.3536 | -0.0051 | 0.0279 | 0.8568 | 32.1467 | 0.3135 | 3.5171  |
| IschemicStroke | g_Oribacterium    | MR Egger                  | 31 | -0.0828 | 0.2334 | 0.7253 | -0.0014 | 0.0167 | 0.9357 | 21.5341 | 0.8390 | 13.8822 |
| IschemicStroke | g_Oribacterium    | Weighted median           | 31 | 0.0416  | 0.1227 | 0.7344 | -0.0014 | 0.0167 | 0.9357 | 21.5341 | 0.8390 | 13.8822 |
| IschemicStroke | g_Oribacterium    | Inverse variance weighted | 31 | -0.1004 | 0.0867 | 0.2468 | -0.0014 | 0.0167 | 0.9357 | 21.5341 | 0.8390 | 13.8822 |
| IschemicStroke | g_Oribacterium    | Simple mode               | 31 | 0.0298  | 0.2500 | 0.9058 | -0.0014 | 0.0167 | 0.9357 | 21.5341 | 0.8390 | 13.8822 |
| IschemicStroke | g_Oribacterium    | Weighted mode             | 31 | 0.0594  | 0.1822 | 0.7466 | -0.0014 | 0.0167 | 0.9357 | 21.5341 | 0.8390 | 13.8822 |
| IschemicStroke | g_Oscillibacter   | MR Egger                  | 31 | 0.6381  | 0.4237 | 0.1429 | -0.0327 | 0.0303 | 0.2898 | 33.9331 | 0.2835 | 3.6453  |
| IschemicStroke | g_Oscillibacter   | Weighted median           | 31 | 0.3788  | 0.2186 | 0.0831 | -0.0327 | 0.0303 | 0.2898 | 33.9331 | 0.2835 | 3.6453  |
| IschemicStroke | g_Oscillibacter   | Inverse variance weighted | 31 | 0.2138  | 0.1579 | 0.1756 | -0.0327 | 0.0303 | 0.2898 | 33.9331 | 0.2835 | 3.6453  |
| IschemicStroke | g_Oscillibacter   | Simple mode               | 31 | 0.6993  | 0.4343 | 0.1178 | -0.0327 | 0.0303 | 0.2898 | 33.9331 | 0.2835 | 3.6453  |
| IschemicStroke | g_Oscillibacter   | Weighted mode             | 31 | 0.6239  | 0.3325 | 0.0704 | -0.0327 | 0.0303 | 0.2898 | 33.9331 | 0.2835 | 3.6453  |
| IschemicStroke | g_Oxalobacter     | MR Egger                  | 31 | 0.5023  | 0.5986 | 0.4082 | -0.0396 | 0.0429 | 0.3632 | 21.6066 | 0.8361 | 1.2601  |
| IschemicStroke | g_Oxalobacter     | Weighted median           | 31 | 0.2226  | 0.3329 | 0.5036 | -0.0396 | 0.0429 | 0.3632 | 21.6066 | 0.8361 | 1.2601  |
| IschemicStroke | g_Oxalobacter     | Inverse variance weighted | 31 | -0.0111 | 0.2224 | 0.9602 | -0.0396 | 0.0429 | 0.3632 | 21.6066 | 0.8361 | 1.2601  |
| IschemicStroke | g_Oxalobacter     | Simple mode               | 31 | 0.1357  | 0.5595 | 0.8100 | -0.0396 | 0.0429 | 0.3632 | 21.6066 | 0.8361 | 1.2601  |
| IschemicStroke | g_Oxalobacter     | Weighted mode             | 31 | 0.2136  | 0.4453 | 0.6350 | -0.0396 | 0.0429 | 0.3632 | 21.6066 | 0.8361 | 1.2601  |
| IschemicStroke | g_Parabacteroides | MR Egger                  | 31 | 0.1713  | 0.2341 | 0.4703 | -0.0055 | 0.0168 | 0.7449 | 32.4997 | 0.2984 | 15.4581 |
| IschemicStroke | g_Parabacteroides | Weighted median           | 31 | 0.0992  | 0.1255 | 0.4294 | -0.0055 | 0.0168 | 0.7449 | 32.4997 | 0.2984 | 15.4581 |
| IschemicStroke | g_Parabacteroides | Inverse variance weighted | 31 | 0.0999  | 0.0857 | 0.2437 | -0.0055 | 0.0168 | 0.7449 | 32.4997 | 0.2984 | 15.4581 |
| IschemicStroke | g_Parabacteroides | Simple mode               | 31 | 0.1579  | 0.2242 | 0.4868 | -0.0055 | 0.0168 | 0.7449 | 32.4997 | 0.2984 | 15.4581 |
| IschemicStroke | g_Parabacteroides | Weighted mode             | 31 | 0.1044  | 0.1724 | 0.5492 | -0.0055 | 0.0168 | 0.7449 | 32.4997 | 0.2984 | 15.4581 |
| IschemicStroke | g_Paraprevotella  | MR Egger                  | 31 | -0.0472 | 0.3528 | 0.8945 | 0.0051  | 0.0253 | 0.8408 | 25.5558 | 0.6491 | 11.9572 |

|                |                        |                           |    |         |        |        |         |        |        |         |        |           |
|----------------|------------------------|---------------------------|----|---------|--------|--------|---------|--------|--------|---------|--------|-----------|
| IschemicStroke | g_Paraprevotella       | Weighted median           | 31 | 0.0278  | 0.1873 | 0.8819 | 0.0051  | 0.0253 | 0.8408 | 25.5558 | 0.6491 | 11.9572   |
| IschemicStroke | g_Paraprevotella       | Inverse variance weighted | 31 | 0.0192  | 0.1311 | 0.8835 | 0.0051  | 0.0253 | 0.8408 | 25.5558 | 0.6491 | 11.9572   |
| IschemicStroke | g_Paraprevotella       | Simple mode               | 31 | 0.0336  | 0.3298 | 0.9196 | 0.0051  | 0.0253 | 0.8408 | 25.5558 | 0.6491 | 11.9572   |
| IschemicStroke | g_Paraprevotella       | Weighted mode             | 31 | 0.0238  | 0.2708 | 0.9306 | 0.0051  | 0.0253 | 0.8408 | 25.5558 | 0.6491 | 11.9572   |
| IschemicStroke | g_Parasutterella       | MR Egger                  | 31 | 1.1358  | 0.8119 | 0.1724 | -0.0578 | 0.0581 | 0.3281 | 31.8506 | 0.3745 | -338.6555 |
| IschemicStroke | g_Parasutterella       | Weighted median           | 31 | 0.1738  | 0.4533 | 0.7014 | -0.0578 | 0.0581 | 0.3281 | 31.8506 | 0.3745 | -338.6555 |
| IschemicStroke | g_Parasutterella       | Inverse variance weighted | 31 | 0.3862  | 0.3018 | 0.2008 | -0.0578 | 0.0581 | 0.3281 | 31.8506 | 0.3745 | -338.6555 |
| IschemicStroke | g_Parasutterella       | Simple mode               | 31 | -0.5530 | 0.8762 | 0.5328 | -0.0578 | 0.0581 | 0.3281 | 31.8506 | 0.3745 | -338.6555 |
| IschemicStroke | g_Parasutterella       | Weighted mode             | 31 | 0.0319  | 0.7185 | 0.9649 | -0.0578 | 0.0581 | 0.3281 | 31.8506 | 0.3745 | -338.6555 |
| IschemicStroke | g_Peptoniphilus        | MR Egger                  | 31 | 0.3132  | 0.4927 | 0.5300 | -0.0108 | 0.0353 | 0.7620 | 37.4491 | 0.1351 | 1.8831    |
| IschemicStroke | g_Peptoniphilus        | Weighted median           | 31 | 0.3023  | 0.2443 | 0.2159 | -0.0108 | 0.0353 | 0.7620 | 37.4491 | 0.1351 | 1.8831    |
| IschemicStroke | g_Peptoniphilus        | Inverse variance weighted | 31 | 0.1734  | 0.1803 | 0.3363 | -0.0108 | 0.0353 | 0.7620 | 37.4491 | 0.1351 | 1.8831    |
| IschemicStroke | g_Peptoniphilus        | Simple mode               | 31 | 0.6966  | 0.5294 | 0.1982 | -0.0108 | 0.0353 | 0.7620 | 37.4491 | 0.1351 | 1.8831    |
| IschemicStroke | g_Peptoniphilus        | Weighted mode             | 31 | 0.6692  | 0.4700 | 0.1648 | -0.0108 | 0.0353 | 0.7620 | 37.4491 | 0.1351 | 1.8831    |
| IschemicStroke | g_Phascolartobacterium | MR Egger                  | 31 | 0.2954  | 0.4767 | 0.5403 | -0.0138 | 0.0341 | 0.6892 | 16.0793 | 0.9746 | 9.1320    |
| IschemicStroke | g_Phascolartobacterium | Weighted median           | 31 | 0.1604  | 0.2432 | 0.5097 | -0.0138 | 0.0341 | 0.6892 | 16.0793 | 0.9746 | 9.1320    |
| IschemicStroke | g_Phascolartobacterium | Inverse variance weighted | 31 | 0.1167  | 0.1771 | 0.5101 | -0.0138 | 0.0341 | 0.6892 | 16.0793 | 0.9746 | 9.1320    |
| IschemicStroke | g_Phascolartobacterium | Simple mode               | 31 | 0.2260  | 0.4569 | 0.6245 | -0.0138 | 0.0341 | 0.6892 | 16.0793 | 0.9746 | 9.1320    |
| IschemicStroke | g_Phascolartobacterium | Weighted mode             | 31 | 0.2559  | 0.3750 | 0.5001 | -0.0138 | 0.0341 | 0.6892 | 16.0793 | 0.9746 | 9.1320    |
| IschemicStroke | g_Porphyromonas        | MR Egger                  | 31 | -0.7286 | 0.5393 | 0.1871 | 0.0550  | 0.0386 | 0.1648 | 23.5285 | 0.7929 | 1.1409    |
| IschemicStroke | g_Porphyromonas        | Weighted median           | 31 | -0.2467 | 0.2985 | 0.4085 | 0.0550  | 0.0386 | 0.1648 | 23.5285 | 0.7929 | 1.1409    |
| IschemicStroke | g_Porphyromonas        | Inverse variance weighted | 31 | -0.0150 | 0.2004 | 0.9403 | 0.0550  | 0.0386 | 0.1648 | 23.5285 | 0.7929 | 1.1409    |
| IschemicStroke | g_Porphyromonas        | Simple mode               | 31 | -0.6076 | 0.5603 | 0.2869 | 0.0550  | 0.0386 | 0.1648 | 23.5285 | 0.7929 | 1.1409    |
| IschemicStroke | g_Porphyromonas        | Weighted mode             | 31 | -0.5937 | 0.4881 | 0.2333 | 0.0550  | 0.0386 | 0.1648 | 23.5285 | 0.7929 | 1.1409    |
| IschemicStroke | g_Providencia          | MR Egger                  | 31 | -0.2820 | 0.6032 | 0.6436 | 0.0091  | 0.0432 | 0.8345 | 38.1264 | 0.1196 | 3.8617    |
| IschemicStroke | g_Providencia          | Weighted median           | 31 | 0.0398  | 0.3023 | 0.8953 | 0.0091  | 0.0432 | 0.8345 | 38.1264 | 0.1196 | 3.8617    |
| IschemicStroke | g_Providencia          | Inverse variance weighted | 31 | -0.1640 | 0.2205 | 0.4572 | 0.0091  | 0.0432 | 0.8345 | 38.1264 | 0.1196 | 3.8617    |
| IschemicStroke | g_Providencia          | Simple mode               | 31 | -0.2702 | 0.5796 | 0.6445 | 0.0091  | 0.0432 | 0.8345 | 38.1264 | 0.1196 | 3.8617    |
| IschemicStroke | g_Providencia          | Weighted mode             | 31 | -0.1043 | 0.4574 | 0.8212 | 0.0091  | 0.0432 | 0.8345 | 38.1264 | 0.1196 | 3.8617    |
| IschemicStroke | g_Pseudoflavonifractor | MR Egger                  | 31 | -0.1006 | 0.2080 | 0.6322 | 0.0083  | 0.0149 | 0.5834 | 24.8397 | 0.6865 | 25.1487   |
| IschemicStroke | g_Pseudoflavonifractor | Weighted median           | 31 | -0.0526 | 0.1122 | 0.6395 | 0.0083  | 0.0149 | 0.5834 | 24.8397 | 0.6865 | 25.1487   |
| IschemicStroke | g_Pseudoflavonifractor | Inverse variance weighted | 31 | 0.0065  | 0.0773 | 0.9331 | 0.0083  | 0.0149 | 0.5834 | 24.8397 | 0.6865 | 25.1487   |
| IschemicStroke | g_Pseudoflavonifractor | Simple mode               | 31 | -0.1018 | 0.1959 | 0.6072 | 0.0083  | 0.0149 | 0.5834 | 24.8397 | 0.6865 | 25.1487   |
| IschemicStroke | g_Pseudoflavonifractor | Weighted mode             | 31 | -0.0684 | 0.1483 | 0.6481 | 0.0083  | 0.0149 | 0.5834 | 24.8397 | 0.6865 | 25.1487   |
| IschemicStroke | g_Roseburia            | MR Egger                  | 31 | 0.4047  | 0.3067 | 0.1974 | -0.0262 | 0.0220 | 0.2420 | 21.7398 | 0.8633 | 10.2587   |
| IschemicStroke | g_Roseburia            | Weighted median           | 31 | 0.0569  | 0.1601 | 0.7223 | -0.0262 | 0.0220 | 0.2420 | 21.7398 | 0.8633 | 10.2587   |
| IschemicStroke | g_Roseburia            | Inverse variance weighted | 31 | 0.0646  | 0.1140 | 0.5709 | -0.0262 | 0.0220 | 0.2420 | 21.7398 | 0.8633 | 10.2587   |
| IschemicStroke | g_Roseburia            | Simple mode               | 31 | -0.0026 | 0.3202 | 0.9936 | -0.0262 | 0.0220 | 0.2420 | 21.7398 | 0.8633 | 10.2587   |
| IschemicStroke | g_Roseburia            | Weighted mode             | 31 | 0.0735  | 0.2683 | 0.7859 | -0.0262 | 0.0220 | 0.2420 | 21.7398 | 0.8633 | 10.2587   |
| IschemicStroke | g_Ruminococcus         | MR Egger                  | 31 | -0.0628 | 0.3118 | 0.8417 | 0.0000  | 0.0223 | 0.9998 | 41.2859 | 0.0650 | 8.0325    |
| IschemicStroke | g_Ruminococcus         | Weighted median           | 31 | 0.0435  | 0.1498 | 0.7714 | 0.0000  | 0.0223 | 0.9998 | 41.2859 | 0.0650 | 8.0325    |
| IschemicStroke | g_Ruminococcus         | Inverse variance weighted | 31 | -0.0629 | 0.1139 | 0.5809 | 0.0000  | 0.0223 | 0.9998 | 41.2859 | 0.0650 | 8.0325    |
| IschemicStroke | g_Ruminococcus         | Simple mode               | 31 | -0.0664 | 0.2648 | 0.8038 | 0.0000  | 0.0223 | 0.9998 | 41.2859 | 0.0650 | 8.0325    |
| IschemicStroke | g_Ruminococcus         | Weighted mode             | 31 | 0.0264  | 0.2088 | 0.9002 | 0.0000  | 0.0223 | 0.9998 | 41.2859 | 0.0650 | 8.0325    |
| IschemicStroke | g_Salmonella           | MR Egger                  | 31 | 0.0406  | 0.5656 | 0.9433 | -0.0073 | 0.0405 | 0.8587 | 35.8879 | 0.1769 | 2.4138    |
| IschemicStroke | g_Salmonella           | Weighted median           | 31 | 0.2556  | 0.2870 | 0.3732 | -0.0073 | 0.0405 | 0.8587 | 35.8879 | 0.1769 | 2.4138    |
| IschemicStroke | g_Salmonella           | Inverse variance weighted | 31 | -0.0538 | 0.2068 | 0.7949 | -0.0073 | 0.0405 | 0.8587 | 35.8879 | 0.1769 | 2.4138    |
| IschemicStroke | g_Salmonella           | Simple mode               | 31 | 0.1468  | 0.6137 | 0.8125 | -0.0073 | 0.0405 | 0.8587 | 35.8879 | 0.1769 | 2.4138    |
| IschemicStroke | g_Salmonella           | Weighted mode             | 31 | 0.2637  | 0.4364 | 0.5502 | -0.0073 | 0.0405 | 0.8587 | 35.8879 | 0.1769 | 2.4138    |
| IschemicStroke | g_Shuttleworthia       | MR Egger                  | 31 | 0.4423  | 0.4639 | 0.3483 | -0.0311 | 0.0332 | 0.3571 | 19.2663 | 0.9343 | 5.6428    |
| IschemicStroke | g_Shuttleworthia       | Weighted median           | 31 | -0.0557 | 0.2330 | 0.8112 | -0.0311 | 0.0332 | 0.3571 | 19.2663 | 0.9343 | 5.6428    |
| IschemicStroke | g_Shuttleworthia       | Inverse variance weighted | 31 | 0.0393  | 0.1724 | 0.8198 | -0.0311 | 0.0332 | 0.3571 | 19.2663 | 0.9343 | 5.6428    |
| IschemicStroke | g_Shuttleworthia       | Simple mode               | 31 | -0.2130 | 0.4125 | 0.6093 | -0.0311 | 0.0332 | 0.3571 | 19.2663 | 0.9343 | 5.6428    |
| IschemicStroke | g_Shuttleworthia       | Weighted mode             | 31 | -0.0793 | 0.3284 | 0.8108 | -0.0311 | 0.0332 | 0.3571 | 19.2663 | 0.9343 | 5.6428    |
| IschemicStroke | g_Solobacterium        | MR Egger                  | 31 | -0.2339 | 0.3743 | 0.5370 | 0.0170  | 0.0268 | 0.5312 | 28.4554 | 0.4937 | 8.0254    |
| IschemicStroke | g_Solobacterium        | Weighted median           | 31 | -0.1305 | 0.2143 | 0.5426 | 0.0170  | 0.0268 | 0.5312 | 28.4554 | 0.4937 | 8.0254    |
| IschemicStroke | g_Solobacterium        | Inverse variance weighted | 31 | -0.0136 | 0.1391 | 0.9221 | 0.0170  | 0.0268 | 0.5312 | 28.4554 | 0.4937 | 8.0254    |
| IschemicStroke | g_Solobacterium        | Simple mode               | 31 | -0.1490 | 0.3856 | 0.7018 | 0.0170  | 0.0268 | 0.5312 | 28.4554 | 0.4937 | 8.0254    |
| IschemicStroke | g_Solobacterium        | Weighted mode             | 31 | -0.2328 | 0.3098 | 0.4581 | 0.0170  | 0.0268 | 0.5312 | 28.4554 | 0.4937 | 8.0254    |
| IschemicStroke | g_Subdoligranulum      | MR Egger                  | 31 | 0.6150  | 0.2862 | 0.0401 | -0.0339 | 0.0205 | 0.1092 | 31.4277 | 0.3946 | 8.6340    |
| IschemicStroke | g_Subdoligranulum      | Weighted median           | 31 | 0.1294  | 0.1599 | 0.4184 | -0.0339 | 0.0205 | 0.1092 | 31.4277 | 0.3946 | 8.6340    |

|                |                        |                           |    |         |        |        |         |        |        |         |        |          |
|----------------|------------------------|---------------------------|----|---------|--------|--------|---------|--------|--------|---------|--------|----------|
| IschemicStroke | g_Subdoligranulum      | Inverse variance weighted | 31 | 0.1759  | 0.1088 | 0.1061 | -0.0339 | 0.0205 | 0.1092 | 31.4277 | 0.3946 | 8.6340   |
| IschemicStroke | g_Subdoligranulum      | Simple mode               | 31 | 0.0799  | 0.3176 | 0.8030 | -0.0339 | 0.0205 | 0.1092 | 31.4277 | 0.3946 | 8.6340   |
| IschemicStroke | g_Subdoligranulum      | Weighted mode             | 31 | 0.1743  | 0.2631 | 0.5128 | -0.0339 | 0.0205 | 0.1092 | 31.4277 | 0.3946 | 8.6340   |
| IschemicStroke | g_Sutterella           | MR Egger                  | 31 | 1.2585  | 0.9171 | 0.1805 | -0.0847 | 0.0657 | 0.2073 | 38.9660 | 0.1265 | 188.4043 |
| IschemicStroke | g_Sutterella           | Weighted median           | 31 | 0.2763  | 0.4673 | 0.5543 | -0.0847 | 0.0657 | 0.2073 | 38.9660 | 0.1265 | 188.4043 |
| IschemicStroke | g_Sutterella           | Inverse variance weighted | 31 | 0.1602  | 0.3446 | 0.6420 | -0.0847 | 0.0657 | 0.2073 | 38.9660 | 0.1265 | 188.4043 |
| IschemicStroke | g_Sutterella           | Simple mode               | 31 | -0.4912 | 1.0283 | 0.6364 | -0.0847 | 0.0657 | 0.2073 | 38.9660 | 0.1265 | 188.4043 |
| IschemicStroke | g_Sutterella           | Weighted mode             | 31 | 1.4959  | 0.8442 | 0.0866 | -0.0847 | 0.0657 | 0.2073 | 38.9660 | 0.1265 | 188.4043 |
| IschemicStroke | g_Tannerella           | MR Egger                  | 31 | 0.5174  | 0.5519 | 0.3562 | -0.0292 | 0.0395 | 0.4655 | 51.6052 | 0.0060 | 1.1474   |
| IschemicStroke | g_Tannerella           | Weighted median           | 31 | 0.5052  | 0.2399 | 0.0352 | -0.0292 | 0.0395 | 0.4655 | 51.6052 | 0.0060 | 1.1474   |
| IschemicStroke | g_Tannerella           | Inverse variance weighted | 31 | 0.1385  | 0.2035 | 0.4961 | -0.0292 | 0.0395 | 0.4655 | 51.6052 | 0.0060 | 1.1474   |
| IschemicStroke | g_Tannerella           | Simple mode               | 31 | 0.5332  | 0.5150 | 0.3088 | -0.0292 | 0.0395 | 0.4655 | 51.6052 | 0.0060 | 1.1474   |
| IschemicStroke | g_Tannerella           | Weighted mode             | 31 | 0.5971  | 0.3924 | 0.1385 | -0.0292 | 0.0395 | 0.4655 | 51.6052 | 0.0060 | 1.1474   |
| IschemicStroke | g_Treponema            | MR Egger                  | 31 | 0.5033  | 0.3001 | 0.1043 | -0.0318 | 0.0215 | 0.1500 | 31.3116 | 0.4002 | 7.8433   |
| IschemicStroke | g_Treponema            | Weighted median           | 31 | 0.1554  | 0.1603 | 0.3324 | -0.0318 | 0.0215 | 0.1500 | 31.3116 | 0.4002 | 7.8433   |
| IschemicStroke | g_Treponema            | Inverse variance weighted | 31 | 0.0913  | 0.1137 | 0.4221 | -0.0318 | 0.0215 | 0.1500 | 31.3116 | 0.4002 | 7.8433   |
| IschemicStroke | g_Treponema            | Simple mode               | 31 | 0.1543  | 0.3109 | 0.6234 | -0.0318 | 0.0215 | 0.1500 | 31.3116 | 0.4002 | 7.8433   |
| IschemicStroke | g_Treponema            | Weighted mode             | 31 | 0.2348  | 0.2410 | 0.3378 | -0.0318 | 0.0215 | 0.1500 | 31.3116 | 0.4002 | 7.8433   |
| IschemicStroke | g_Turicibacter         | MR Egger                  | 31 | -0.5130 | 0.8325 | 0.5425 | 0.0347  | 0.0596 | 0.5645 | 42.6792 | 0.0487 | 24.3694  |
| IschemicStroke | g_Turicibacter         | Weighted median           | 31 | -0.2870 | 0.3804 | 0.4505 | 0.0347  | 0.0596 | 0.5645 | 42.6792 | 0.0487 | 24.3694  |
| IschemicStroke | g_Turicibacter         | Inverse variance weighted | 31 | -0.0625 | 0.3058 | 0.8380 | 0.0347  | 0.0596 | 0.5645 | 42.6792 | 0.0487 | 24.3694  |
| IschemicStroke | g_Turicibacter         | Simple mode               | 31 | -0.2416 | 0.6273 | 0.7029 | 0.0347  | 0.0596 | 0.5645 | 42.6792 | 0.0487 | 24.3694  |
| IschemicStroke | g_Turicibacter         | Weighted mode             | 31 | -0.1566 | 0.5043 | 0.7582 | 0.0347  | 0.0596 | 0.5645 | 42.6792 | 0.0487 | 24.3694  |
| IschemicStroke | g_Veillonella          | MR Egger                  | 31 | -0.7832 | 0.4605 | 0.0997 | 0.0178  | 0.0330 | 0.5927 | 18.7534 | 0.9274 | 2.1850   |
| IschemicStroke | g_Veillonella          | Weighted median           | 31 | -0.4936 | 0.2362 | 0.0366 | 0.0178  | 0.0330 | 0.5927 | 18.7534 | 0.9274 | 2.1850   |
| IschemicStroke | g_Veillonella          | Inverse variance weighted | 31 | -0.5519 | 0.1711 | 0.0013 | 0.0178  | 0.0330 | 0.5927 | 18.7534 | 0.9274 | 2.1850   |
| IschemicStroke | g_Veillonella          | Simple mode               | 31 | -0.4492 | 0.4404 | 0.3159 | 0.0178  | 0.0330 | 0.5927 | 18.7534 | 0.9274 | 2.1850   |
| IschemicStroke | g_Veillonella          | Weighted mode             | 31 | -0.5187 | 0.3708 | 0.1721 | 0.0178  | 0.0330 | 0.5927 | 18.7534 | 0.9274 | 2.1850   |
| IschemicStroke | g_Vibrio               | MR Egger                  | 31 | 0.1554  | 0.6275 | 0.8062 | -0.0165 | 0.0449 | 0.7155 | 27.7839 | 0.5295 | 9.3187   |
| IschemicStroke | g_Vibrio               | Weighted median           | 31 | -0.1979 | 0.3396 | 0.5600 | -0.0165 | 0.0449 | 0.7155 | 27.7839 | 0.5295 | 9.3187   |
| IschemicStroke | g_Vibrio               | Inverse variance weighted | 31 | -0.0590 | 0.2332 | 0.8003 | -0.0165 | 0.0449 | 0.7155 | 27.7839 | 0.5295 | 9.3187   |
| IschemicStroke | g_Vibrio               | Simple mode               | 31 | -0.5712 | 0.6149 | 0.3603 | -0.0165 | 0.0449 | 0.7155 | 27.7839 | 0.5295 | 9.3187   |
| IschemicStroke | g_Vibrio               | Weighted mode             | 31 | -0.3011 | 0.4574 | 0.5153 | -0.0165 | 0.0449 | 0.7155 | 27.7839 | 0.5295 | 9.3187   |
| IschemicStroke | log_f_Aeromonadaceae   | MR Egger                  | 31 | -0.0795 | 0.5815 | 0.8923 | 0.0141  | 0.0416 | 0.7378 | 26.0358 | 0.6236 | 4.2371   |
| IschemicStroke | log_f_Aeromonadaceae   | Weighted median           | 31 | 0.3275  | 0.3010 | 0.2765 | 0.0141  | 0.0416 | 0.7378 | 26.0358 | 0.6236 | 4.2371   |
| IschemicStroke | log_f_Aeromonadaceae   | Inverse variance weighted | 31 | 0.1030  | 0.2158 | 0.6331 | 0.0141  | 0.0416 | 0.7378 | 26.0358 | 0.6236 | 4.2371   |
| IschemicStroke | log_f_Aeromonadaceae   | Simple mode               | 31 | 0.8756  | 0.6194 | 0.1678 | 0.0141  | 0.0416 | 0.7378 | 26.0358 | 0.6236 | 4.2371   |
| IschemicStroke | log_f_Aeromonadaceae   | Weighted mode             | 31 | 0.7573  | 0.5089 | 0.1471 | 0.0141  | 0.0416 | 0.7378 | 26.0358 | 0.6236 | 4.2371   |
| IschemicStroke | log_f_Alcaligenaceae   | MR Egger                  | 31 | 0.1216  | 0.6060 | 0.8424 | -0.0043 | 0.0434 | 0.9214 | 31.5694 | 0.3391 | 1.1357   |
| IschemicStroke | log_f_Alcaligenaceae   | Weighted median           | 31 | 0.1962  | 0.3296 | 0.5516 | -0.0043 | 0.0434 | 0.9214 | 31.5694 | 0.3391 | 1.1357   |
| IschemicStroke | log_f_Alcaligenaceae   | Inverse variance weighted | 31 | 0.0656  | 0.2213 | 0.7671 | -0.0043 | 0.0434 | 0.9214 | 31.5694 | 0.3391 | 1.1357   |
| IschemicStroke | log_f_Alcaligenaceae   | Simple mode               | 31 | 0.2928  | 0.6401 | 0.6507 | -0.0043 | 0.0434 | 0.9214 | 31.5694 | 0.3391 | 1.1357   |
| IschemicStroke | log_f_Alcaligenaceae   | Weighted mode             | 31 | 0.2555  | 0.4512 | 0.5754 | -0.0043 | 0.0434 | 0.9214 | 31.5694 | 0.3391 | 1.1357   |
| IschemicStroke | log_f_Brachyspiraceae  | MR Egger                  | 31 | 0.6619  | 0.7566 | 0.3889 | -0.0500 | 0.0542 | 0.3637 | 48.9713 | 0.0158 | 3.8366   |
| IschemicStroke | log_f_Brachyspiraceae  | Weighted median           | 31 | 0.2579  | 0.3488 | 0.4597 | -0.0500 | 0.0542 | 0.3637 | 48.9713 | 0.0158 | 3.8366   |
| IschemicStroke | log_f_Brachyspiraceae  | Inverse variance weighted | 31 | 0.0134  | 0.2800 | 0.9617 | -0.0500 | 0.0542 | 0.3637 | 48.9713 | 0.0158 | 3.8366   |
| IschemicStroke | log_f_Brachyspiraceae  | Simple mode               | 31 | 0.5718  | 0.5915 | 0.3415 | -0.0500 | 0.0542 | 0.3637 | 48.9713 | 0.0158 | 3.8366   |
| IschemicStroke | log_f_Brachyspiraceae  | Weighted mode             | 31 | 0.4170  | 0.4756 | 0.3875 | -0.0500 | 0.0542 | 0.3637 | 48.9713 | 0.0158 | 3.8366   |
| IschemicStroke | log_f_Comamonadaceae   | MR Egger                  | 31 | -0.0775 | 0.6359 | 0.9038 | -0.0215 | 0.0455 | 0.6394 | 34.5643 | 0.2192 | 1.2990   |
| IschemicStroke | log_f_Comamonadaceae   | Weighted median           | 31 | -0.0431 | 0.3333 | 0.8971 | -0.0215 | 0.0455 | 0.6394 | 34.5643 | 0.2192 | 1.2990   |
| IschemicStroke | log_f_Comamonadaceae   | Inverse variance weighted | 31 | -0.3572 | 0.2327 | 0.1247 | -0.0215 | 0.0455 | 0.6394 | 34.5643 | 0.2192 | 1.2990   |
| IschemicStroke | log_f_Comamonadaceae   | Simple mode               | 31 | -0.0635 | 0.6071 | 0.9173 | -0.0215 | 0.0455 | 0.6394 | 34.5643 | 0.2192 | 1.2990   |
| IschemicStroke | log_f_Comamonadaceae   | Weighted mode             | 31 | -0.0275 | 0.4842 | 0.9550 | -0.0215 | 0.0455 | 0.6394 | 34.5643 | 0.2192 | 1.2990   |
| IschemicStroke | log_f_Moraxellaceae    | MR Egger                  | 31 | -0.4348 | 0.5816 | 0.4607 | 0.0128  | 0.0416 | 0.7612 | 17.5879 | 0.9522 | 1.4339   |
| IschemicStroke | log_f_Moraxellaceae    | Weighted median           | 31 | -0.1543 | 0.3136 | 0.6227 | 0.0128  | 0.0416 | 0.7612 | 17.5879 | 0.9522 | 1.4339   |
| IschemicStroke | log_f_Moraxellaceae    | Inverse variance weighted | 31 | -0.2691 | 0.2158 | 0.2124 | 0.0128  | 0.0416 | 0.7612 | 17.5879 | 0.9522 | 1.4339   |
| IschemicStroke | log_f_Moraxellaceae    | Simple mode               | 31 | -0.3642 | 0.5449 | 0.5090 | 0.0128  | 0.0416 | 0.7612 | 17.5879 | 0.9522 | 1.4339   |
| IschemicStroke | log_f_Moraxellaceae    | Weighted mode             | 31 | -0.2272 | 0.4319 | 0.6027 | 0.0128  | 0.0416 | 0.7612 | 17.5879 | 0.9522 | 1.4339   |
| IschemicStroke | log_f_Paenibacillaceae | MR Egger                  | 31 | 1.0982  | 0.5897 | 0.0727 | -0.0812 | 0.0422 | 0.0641 | 26.7796 | 0.6348 | 1.3747   |
| IschemicStroke | log_f_Paenibacillaceae | Weighted median           | 31 | 0.1645  | 0.3360 | 0.6245 | -0.0812 | 0.0422 | 0.0641 | 26.7796 | 0.6348 | 1.3747   |
| IschemicStroke | log_f_Paenibacillaceae | Inverse variance weighted | 31 | 0.0438  | 0.2182 | 0.8409 | -0.0812 | 0.0422 | 0.0641 | 26.7796 | 0.6348 | 1.3747   |

|                |                               |                           |    |         |        |        |         |        |        |         |        |         |
|----------------|-------------------------------|---------------------------|----|---------|--------|--------|---------|--------|--------|---------|--------|---------|
| IschemicStroke | log_f_Paenibacillaceae        | Simple mode               | 31 | -0.0591 | 0.7083 | 0.9341 | -0.0812 | 0.0422 | 0.0641 | 26.7796 | 0.6348 | 1.3747  |
| IschemicStroke | log_f_Paenibacillaceae        | Weighted mode             | 31 | 0.3254  | 0.4932 | 0.5144 | -0.0812 | 0.0422 | 0.0641 | 26.7796 | 0.6348 | 1.3747  |
| IschemicStroke | log_f_Peptococcaceae          | MR Egger                  | 31 | -0.0451 | 0.7080 | 0.9496 | -0.0040 | 0.0507 | 0.9374 | 42.4699 | 0.0509 | 4.9976  |
| IschemicStroke | log_f_Peptococcaceae          | Weighted median           | 31 | 0.0901  | 0.3396 | 0.7908 | -0.0040 | 0.0507 | 0.9374 | 42.4699 | 0.0509 | 4.9976  |
| IschemicStroke | log_f_Peptococcaceae          | Inverse variance weighted | 31 | -0.0973 | 0.2581 | 0.7063 | -0.0040 | 0.0507 | 0.9374 | 42.4699 | 0.0509 | 4.9976  |
| IschemicStroke | log_f_Peptococcaceae          | Simple mode               | 31 | 0.7030  | 0.6437 | 0.2835 | -0.0040 | 0.0507 | 0.9374 | 42.4699 | 0.0509 | 4.9976  |
| IschemicStroke | log_f_Peptococcaceae          | Weighted mode             | 31 | 0.5170  | 0.5261 | 0.3336 | -0.0040 | 0.0507 | 0.9374 | 42.4699 | 0.0509 | 4.9976  |
| IschemicStroke | log_f_Pseudomonadaceae        | MR Egger                  | 31 | 0.4630  | 0.5845 | 0.4347 | -0.0413 | 0.0418 | 0.3312 | 27.7322 | 0.5846 | 5.5508  |
| IschemicStroke | log_f_Pseudomonadaceae        | Weighted median           | 31 | 0.2735  | 0.3112 | 0.3796 | -0.0413 | 0.0418 | 0.3312 | 27.7322 | 0.5846 | 5.5508  |
| IschemicStroke | log_f_Pseudomonadaceae        | Inverse variance weighted | 31 | -0.0735 | 0.2166 | 0.7344 | -0.0413 | 0.0418 | 0.3312 | 27.7322 | 0.5846 | 5.5508  |
| IschemicStroke | log_f_Pseudomonadaceae        | Simple mode               | 31 | -0.2879 | 0.6601 | 0.6658 | -0.0413 | 0.0418 | 0.3312 | 27.7322 | 0.5846 | 5.5508  |
| IschemicStroke | log_f_Pseudomonadaceae        | Weighted mode             | 31 | 0.3674  | 0.4770 | 0.4473 | -0.0413 | 0.0418 | 0.3312 | 27.7322 | 0.5846 | 5.5508  |
| IschemicStroke | log_f_Rhodocyclaceae          | MR Egger                  | 31 | -0.3209 | 0.7031 | 0.6515 | 0.0164  | 0.0503 | 0.7471 | 42.3174 | 0.0526 | 1.9763  |
| IschemicStroke | log_f_Rhodocyclaceae          | Weighted median           | 31 | -0.1251 | 0.3261 | 0.7012 | 0.0164  | 0.0503 | 0.7471 | 42.3174 | 0.0526 | 1.9763  |
| IschemicStroke | log_f_Rhodocyclaceae          | Inverse variance weighted | 31 | -0.1084 | 0.2572 | 0.6735 | 0.0164  | 0.0503 | 0.7471 | 42.3174 | 0.0526 | 1.9763  |
| IschemicStroke | log_f_Rhodocyclaceae          | Simple mode               | 31 | -0.3400 | 0.5835 | 0.5644 | 0.0164  | 0.0503 | 0.7471 | 42.3174 | 0.0526 | 1.9763  |
| IschemicStroke | log_f_Rhodocyclaceae          | Weighted mode             | 31 | -0.2238 | 0.4822 | 0.6460 | 0.0164  | 0.0503 | 0.7471 | 42.3174 | 0.0526 | 1.9763  |
| IschemicStroke | log_f_Succinivibrionaceae     | MR Egger                  | 31 | 0.6124  | 0.5795 | 0.2993 | -0.0435 | 0.0415 | 0.3035 | 29.8330 | 0.4742 | 1.5688  |
| IschemicStroke | log_f_Succinivibrionaceae     | Weighted median           | 31 | -0.2227 | 0.3323 | 0.5027 | -0.0435 | 0.0415 | 0.3035 | 29.8330 | 0.4742 | 1.5688  |
| IschemicStroke | log_f_Succinivibrionaceae     | Inverse variance weighted | 31 | 0.0489  | 0.2154 | 0.8205 | -0.0435 | 0.0415 | 0.3035 | 29.8330 | 0.4742 | 1.5688  |
| IschemicStroke | log_f_Succinivibrionaceae     | Simple mode               | 31 | -0.3246 | 0.6447 | 0.6182 | -0.0435 | 0.0415 | 0.3035 | 29.8330 | 0.4742 | 1.5688  |
| IschemicStroke | log_f_Succinivibrionaceae     | Weighted mode             | 31 | -0.2584 | 0.5914 | 0.6653 | -0.0435 | 0.0415 | 0.3035 | 29.8330 | 0.4742 | 1.5688  |
| IschemicStroke | log_f_Thermoanaerobacteraceae | MR Egger                  | 31 | -0.4095 | 0.7214 | 0.5746 | 0.0249  | 0.0517 | 0.6331 | 43.3338 | 0.0424 | 2.1682  |
| IschemicStroke | log_f_Thermoanaerobacteraceae | Weighted median           | 31 | -0.4762 | 0.3313 | 0.1506 | 0.0249  | 0.0517 | 0.6331 | 43.3338 | 0.0424 | 2.1682  |
| IschemicStroke | log_f_Thermoanaerobacteraceae | Inverse variance weighted | 31 | -0.0864 | 0.2647 | 0.7441 | 0.0249  | 0.0517 | 0.6331 | 43.3338 | 0.0424 | 2.1682  |
| IschemicStroke | log_f_Thermoanaerobacteraceae | Simple mode               | 31 | -0.5754 | 0.5764 | 0.3261 | 0.0249  | 0.0517 | 0.6331 | 43.3338 | 0.0424 | 2.1682  |
| IschemicStroke | log_f_Thermoanaerobacteraceae | Weighted mode             | 31 | -0.4074 | 0.4743 | 0.3972 | 0.0249  | 0.0517 | 0.6331 | 43.3338 | 0.0424 | 2.1682  |
| IschemicStroke | log_g_Acetivibrio             | MR Egger                  | 31 | 0.9520  | 0.5948 | 0.1203 | -0.0588 | 0.0425 | 0.1774 | 31.5542 | 0.3885 | 2.4044  |
| IschemicStroke | log_g_Acetivibrio             | Weighted median           | 31 | 0.4773  | 0.3311 | 0.1494 | -0.0588 | 0.0425 | 0.1774 | 31.5542 | 0.3885 | 2.4044  |
| IschemicStroke | log_g_Acetivibrio             | Inverse variance weighted | 31 | 0.1882  | 0.2236 | 0.4000 | -0.0588 | 0.0425 | 0.1774 | 31.5542 | 0.3885 | 2.4044  |
| IschemicStroke | log_g_Acetivibrio             | Simple mode               | 31 | 0.4106  | 0.5779 | 0.4829 | -0.0588 | 0.0425 | 0.1774 | 31.5542 | 0.3885 | 2.4044  |
| IschemicStroke | log_g_Acetivibrio             | Weighted mode             | 31 | 0.5559  | 0.4555 | 0.2319 | -0.0588 | 0.0425 | 0.1774 | 31.5542 | 0.3885 | 2.4044  |
| IschemicStroke | log_g_Achromobacter           | MR Egger                  | 31 | -0.2988 | 0.5848 | 0.6132 | 0.0085  | 0.0419 | 0.8410 | 29.2607 | 0.4516 | 2.6591  |
| IschemicStroke | log_g_Achromobacter           | Weighted median           | 31 | -0.0209 | 0.3197 | 0.9480 | 0.0085  | 0.0419 | 0.8410 | 29.2607 | 0.4516 | 2.6591  |
| IschemicStroke | log_g_Achromobacter           | Inverse variance weighted | 31 | -0.1889 | 0.2162 | 0.3824 | 0.0085  | 0.0419 | 0.8410 | 29.2607 | 0.4516 | 2.6591  |
| IschemicStroke | log_g_Achromobacter           | Simple mode               | 31 | -0.0263 | 0.5835 | 0.9644 | 0.0085  | 0.0419 | 0.8410 | 29.2607 | 0.4516 | 2.6591  |
| IschemicStroke | log_g_Achromobacter           | Weighted mode             | 31 | 0.0623  | 0.4666 | 0.8947 | 0.0085  | 0.0419 | 0.8410 | 29.2607 | 0.4516 | 2.6591  |
| IschemicStroke | log_g_Acidovorax              | MR Egger                  | 31 | -0.1346 | 0.6108 | 0.8272 | -0.0072 | 0.0437 | 0.8696 | 32.2915 | 0.3072 | 2.6191  |
| IschemicStroke | log_g_Acidovorax              | Weighted median           | 31 | 0.0346  | 0.3258 | 0.9155 | -0.0072 | 0.0437 | 0.8696 | 32.2915 | 0.3072 | 2.6191  |
| IschemicStroke | log_g_Acidovorax              | Inverse variance weighted | 31 | -0.2286 | 0.2228 | 0.3050 | -0.0072 | 0.0437 | 0.8696 | 32.2915 | 0.3072 | 2.6191  |
| IschemicStroke | log_g_Acidovorax              | Simple mode               | 31 | 0.1890  | 0.5674 | 0.7414 | -0.0072 | 0.0437 | 0.8696 | 32.2915 | 0.3072 | 2.6191  |
| IschemicStroke | log_g_Acidovorax              | Weighted mode             | 31 | 0.2755  | 0.5148 | 0.5964 | -0.0072 | 0.0437 | 0.8696 | 32.2915 | 0.3072 | 2.6191  |
| IschemicStroke | log_g_Actinobacillus          | MR Egger                  | 31 | -0.3204 | 0.5832 | 0.5869 | 0.0212  | 0.0418 | 0.6149 | 24.9810 | 0.6792 | 2.6482  |
| IschemicStroke | log_g_Actinobacillus          | Weighted median           | 31 | 0.0184  | 0.3109 | 0.9529 | 0.0212  | 0.0418 | 0.6149 | 24.9810 | 0.6792 | 2.6482  |
| IschemicStroke | log_g_Actinobacillus          | Inverse variance weighted | 31 | -0.0451 | 0.2167 | 0.8351 | 0.0212  | 0.0418 | 0.6149 | 24.9810 | 0.6792 | 2.6482  |
| IschemicStroke | log_g_Actinobacillus          | Simple mode               | 31 | 0.2671  | 0.5972 | 0.6579 | 0.0212  | 0.0418 | 0.6149 | 24.9810 | 0.6792 | 2.6482  |
| IschemicStroke | log_g_Actinobacillus          | Weighted mode             | 31 | 0.0672  | 0.4666 | 0.8865 | 0.0212  | 0.0418 | 0.6149 | 24.9810 | 0.6792 | 2.6482  |
| IschemicStroke | log_g_Alkaliphilus            | MR Egger                  | 31 | -0.1975 | 0.5871 | 0.7390 | 0.0189  | 0.0420 | 0.6568 | 26.7466 | 0.5854 | 60.9377 |
| IschemicStroke | log_g_Alkaliphilus            | Weighted median           | 31 | 0.2000  | 0.3119 | 0.5215 | 0.0189  | 0.0420 | 0.6568 | 26.7466 | 0.5854 | 60.9377 |
| IschemicStroke | log_g_Alkaliphilus            | Inverse variance weighted | 31 | 0.0473  | 0.2178 | 0.8282 | 0.0189  | 0.0420 | 0.6568 | 26.7466 | 0.5854 | 60.9377 |
| IschemicStroke | log_g_Alkaliphilus            | Simple mode               | 31 | 0.4221  | 0.5833 | 0.4749 | 0.0189  | 0.0420 | 0.6568 | 26.7466 | 0.5854 | 60.9377 |
| IschemicStroke | log_g_Alkaliphilus            | Weighted mode             | 31 | 0.2508  | 0.4644 | 0.5932 | 0.0189  | 0.0420 | 0.6568 | 26.7466 | 0.5854 | 60.9377 |
| IschemicStroke | log_g_Cellulosilyticum        | MR Egger                  | 31 | 0.1128  | 0.6123 | 0.8551 | 0.0048  | 0.0438 | 0.9129 | 32.4350 | 0.3011 | 1.3122  |
| IschemicStroke | log_g_Cellulosilyticum        | Weighted median           | 31 | 0.4239  | 0.3315 | 0.2010 | 0.0048  | 0.0438 | 0.9129 | 32.4350 | 0.3011 | 1.3122  |
| IschemicStroke | log_g_Cellulosilyticum        | Inverse variance weighted | 31 | 0.1756  | 0.2235 | 0.4322 | 0.0048  | 0.0438 | 0.9129 | 32.4350 | 0.3011 | 1.3122  |
| IschemicStroke | log_g_Cellulosilyticum        | Simple mode               | 31 | 0.5831  | 0.6512 | 0.3777 | 0.0048  | 0.0438 | 0.9129 | 32.4350 | 0.3011 | 1.3122  |
| IschemicStroke | log_g_Cellulosilyticum        | Weighted mode             | 31 | 0.6730  | 0.5776 | 0.2531 | 0.0048  | 0.0438 | 0.9129 | 32.4350 | 0.3011 | 1.3122  |
| IschemicStroke | log_g_Cronobacter             | MR Egger                  | 31 | 0.5999  | 0.6111 | 0.3344 | -0.0694 | 0.0437 | 0.1237 | 34.9600 | 0.2441 | 8.5557  |
| IschemicStroke | log_g_Cronobacter             | Weighted median           | 31 | 0.1364  | 0.3285 | 0.6781 | -0.0694 | 0.0437 | 0.1237 | 34.9600 | 0.2441 | 8.5557  |
| IschemicStroke | log_g_Cronobacter             | Inverse variance weighted | 31 | -0.2999 | 0.2325 | 0.1972 | -0.0694 | 0.0437 | 0.1237 | 34.9600 | 0.2441 | 8.5557  |
| IschemicStroke | log_g_Cronobacter             | Simple mode               | 31 | 0.0639  | 0.6276 | 0.9196 | -0.0694 | 0.0437 | 0.1237 | 34.9600 | 0.2441 | 8.5557  |

|                |                      |                           |    |         |        |        |         |        |        |         |        |          |
|----------------|----------------------|---------------------------|----|---------|--------|--------|---------|--------|--------|---------|--------|----------|
| IschemicStroke | log_g_Cronobacter    | Weighted mode             | 31 | 0.1364  | 0.4318 | 0.7543 | -0.0694 | 0.0437 | 0.1237 | 34.9600 | 0.2441 | 8.5557   |
| IschemicStroke | log_g_Dickeya        | MR Egger                  | 31 | -0.0689 | 0.6262 | 0.9131 | -0.0211 | 0.0448 | 0.6409 | 33.7810 | 0.2474 | 4.6843   |
| IschemicStroke | log_g_Dickeya        | Weighted median           | 31 | -0.4240 | 0.3196 | 0.1846 | -0.0211 | 0.0448 | 0.6409 | 33.7810 | 0.2474 | 4.6843   |
| IschemicStroke | log_g_Dickeya        | Inverse variance weighted | 31 | -0.3431 | 0.2293 | 0.1345 | -0.0211 | 0.0448 | 0.6409 | 33.7810 | 0.2474 | 4.6843   |
| IschemicStroke | log_g_Dickeya        | Simple mode               | 31 | -0.4868 | 0.6591 | 0.4659 | -0.0211 | 0.0448 | 0.6409 | 33.7810 | 0.2474 | 4.6843   |
| IschemicStroke | log_g_Dickeya        | Weighted mode             | 31 | -0.5237 | 0.5873 | 0.3796 | -0.0211 | 0.0448 | 0.6409 | 33.7810 | 0.2474 | 4.6843   |
| IschemicStroke | log_g_Dysgonomonas   | MR Egger                  | 31 | 0.8143  | 0.5820 | 0.1724 | -0.0499 | 0.0417 | 0.2403 | 24.8248 | 0.7335 | 2.4646   |
| IschemicStroke | log_g_Dysgonomonas   | Weighted median           | 31 | 0.2347  | 0.3129 | 0.4533 | -0.0499 | 0.0417 | 0.2403 | 24.8248 | 0.7335 | 2.4646   |
| IschemicStroke | log_g_Dysgonomonas   | Inverse variance weighted | 31 | 0.1664  | 0.2160 | 0.4411 | -0.0499 | 0.0417 | 0.2403 | 24.8248 | 0.7335 | 2.4646   |
| IschemicStroke | log_g_Dysgonomonas   | Simple mode               | 31 | -0.0728 | 0.5775 | 0.9005 | -0.0499 | 0.0417 | 0.2403 | 24.8248 | 0.7335 | 2.4646   |
| IschemicStroke | log_g_Dysgonomonas   | Weighted mode             | 31 | 0.1662  | 0.4848 | 0.7341 | -0.0499 | 0.0417 | 0.2403 | 24.8248 | 0.7335 | 2.4646   |
| IschemicStroke | log_g_Edwarsiella    | MR Egger                  | 31 | -0.2997 | 0.5829 | 0.6111 | 0.0098  | 0.0417 | 0.8157 | 28.7242 | 0.4795 | 10.2024  |
| IschemicStroke | log_g_Edwarsiella    | Weighted median           | 31 | -0.0373 | 0.3194 | 0.9070 | 0.0098  | 0.0417 | 0.8157 | 28.7242 | 0.4795 | 10.2024  |
| IschemicStroke | log_g_Edwarsiella    | Inverse variance weighted | 31 | -0.1723 | 0.2158 | 0.4245 | 0.0098  | 0.0417 | 0.8157 | 28.7242 | 0.4795 | 10.2024  |
| IschemicStroke | log_g_Edwarsiella    | Simple mode               | 31 | 0.5093  | 0.7148 | 0.4817 | 0.0098  | 0.0417 | 0.8157 | 28.7242 | 0.4795 | 10.2024  |
| IschemicStroke | log_g_Edwarsiella    | Weighted mode             | 31 | 0.4437  | 0.5175 | 0.3981 | 0.0098  | 0.0417 | 0.8157 | 28.7242 | 0.4795 | 10.2024  |
| IschemicStroke | log_g_Epulopiscium   | MR Egger                  | 31 | 0.0813  | 0.7693 | 0.9166 | 0.0145  | 0.0550 | 0.7934 | 50.0512 | 0.0089 | 20.5797  |
| IschemicStroke | log_g_Epulopiscium   | Weighted median           | 31 | 0.2609  | 0.3363 | 0.4379 | 0.0145  | 0.0550 | 0.7934 | 50.0512 | 0.0089 | 20.5797  |
| IschemicStroke | log_g_Epulopiscium   | Inverse variance weighted | 31 | 0.2701  | 0.2810 | 0.3364 | 0.0145  | 0.0550 | 0.7934 | 50.0512 | 0.0089 | 20.5797  |
| IschemicStroke | log_g_Epulopiscium   | Simple mode               | 31 | -0.0229 | 0.6744 | 0.9731 | 0.0145  | 0.0550 | 0.7934 | 50.0512 | 0.0089 | 20.5797  |
| IschemicStroke | log_g_Epulopiscium   | Weighted mode             | 31 | 0.2769  | 0.5104 | 0.5915 | 0.0145  | 0.0550 | 0.7934 | 50.0512 | 0.0089 | 20.5797  |
| IschemicStroke | log_g_Eremococcus    | MR Egger                  | 31 | -0.0849 | 0.5787 | 0.8844 | 0.0156  | 0.0414 | 0.7090 | 27.5631 | 0.5414 | 2.0550   |
| IschemicStroke | log_g_Eremococcus    | Weighted median           | 31 | 0.2373  | 0.3320 | 0.4747 | 0.0156  | 0.0414 | 0.7090 | 27.5631 | 0.5414 | 2.0550   |
| IschemicStroke | log_g_Eremococcus    | Inverse variance weighted | 31 | 0.1176  | 0.2151 | 0.5846 | 0.0156  | 0.0414 | 0.7090 | 27.5631 | 0.5414 | 2.0550   |
| IschemicStroke | log_g_Eremococcus    | Simple mode               | 31 | 0.2117  | 0.5896 | 0.7221 | 0.0156  | 0.0414 | 0.7090 | 27.5631 | 0.5414 | 2.0550   |
| IschemicStroke | log_g_Eremococcus    | Weighted mode             | 31 | 0.0468  | 0.4900 | 0.9245 | 0.0156  | 0.0414 | 0.7090 | 27.5631 | 0.5414 | 2.0550   |
| IschemicStroke | log_g_Erwinia        | MR Egger                  | 31 | -0.0384 | 0.6423 | 0.9528 | -0.0017 | 0.0460 | 0.9709 | 35.2832 | 0.1954 | 5.5404   |
| IschemicStroke | log_g_Erwinia        | Weighted median           | 31 | 0.1286  | 0.3243 | 0.6918 | -0.0017 | 0.0460 | 0.9709 | 35.2832 | 0.1954 | 5.5404   |
| IschemicStroke | log_g_Erwinia        | Inverse variance weighted | 31 | -0.0603 | 0.2345 | 0.7969 | -0.0017 | 0.0460 | 0.9709 | 35.2832 | 0.1954 | 5.5404   |
| IschemicStroke | log_g_Erwinia        | Simple mode               | 31 | 0.4287  | 0.6427 | 0.5098 | -0.0017 | 0.0460 | 0.9709 | 35.2832 | 0.1954 | 5.5404   |
| IschemicStroke | log_g_Erwinia        | Weighted mode             | 31 | 0.2915  | 0.4475 | 0.5197 | -0.0017 | 0.0460 | 0.9709 | 35.2832 | 0.1954 | 5.5404   |
| IschemicStroke | log_g_Ethanoligenens | MR Egger                  | 31 | 0.5530  | 0.5896 | 0.3560 | -0.0300 | 0.0422 | 0.4823 | 26.8788 | 0.5782 | 1.3426   |
| IschemicStroke | log_g_Ethanoligenens | Weighted median           | 31 | 0.1929  | 0.3112 | 0.5354 | -0.0300 | 0.0422 | 0.4823 | 26.8788 | 0.5782 | 1.3426   |
| IschemicStroke | log_g_Ethanoligenens | Inverse variance weighted | 31 | 0.1633  | 0.2188 | 0.4555 | -0.0300 | 0.0422 | 0.4823 | 26.8788 | 0.5782 | 1.3426   |
| IschemicStroke | log_g_Ethanoligenens | Simple mode               | 31 | 0.2962  | 0.5625 | 0.6023 | -0.0300 | 0.0422 | 0.4823 | 26.8788 | 0.5782 | 1.3426   |
| IschemicStroke | log_g_Ethanoligenens | Weighted mode             | 31 | 0.3524  | 0.4320 | 0.4210 | -0.0300 | 0.0422 | 0.4823 | 26.8788 | 0.5782 | 1.3426   |
| IschemicStroke | log_g_Filifactor     | MR Egger                  | 31 | 1.0684  | 0.7224 | 0.1500 | -0.0567 | 0.0517 | 0.2814 | 46.4852 | 0.0279 | 285.3424 |
| IschemicStroke | log_g_Filifactor     | Weighted median           | 31 | 0.1861  | 0.3182 | 0.5586 | -0.0567 | 0.0517 | 0.2814 | 46.4852 | 0.0279 | 285.3424 |
| IschemicStroke | log_g_Filifactor     | Inverse variance weighted | 31 | 0.3318  | 0.2685 | 0.2166 | -0.0567 | 0.0517 | 0.2814 | 46.4852 | 0.0279 | 285.3424 |
| IschemicStroke | log_g_Filifactor     | Simple mode               | 31 | 0.2364  | 0.5414 | 0.6655 | -0.0567 | 0.0517 | 0.2814 | 46.4852 | 0.0279 | 285.3424 |
| IschemicStroke | log_g_Filifactor     | Weighted mode             | 31 | 0.1951  | 0.4273 | 0.6512 | -0.0567 | 0.0517 | 0.2814 | 46.4852 | 0.0279 | 285.3424 |
| IschemicStroke | log_g_Finegoldia     | MR Egger                  | 31 | 0.6296  | 0.6652 | 0.3517 | -0.0190 | 0.0476 | 0.6925 | 36.8030 | 0.1513 | 4.1883   |
| IschemicStroke | log_g_Finegoldia     | Weighted median           | 31 | 0.4243  | 0.3633 | 0.2429 | -0.0190 | 0.0476 | 0.6925 | 36.8030 | 0.1513 | 4.1883   |
| IschemicStroke | log_g_Finegoldia     | Inverse variance weighted | 31 | 0.3827  | 0.2425 | 0.1145 | -0.0190 | 0.0476 | 0.6925 | 36.8030 | 0.1513 | 4.1883   |
| IschemicStroke | log_g_Finegoldia     | Simple mode               | 31 | -0.5397 | 0.6301 | 0.3986 | -0.0190 | 0.0476 | 0.6925 | 36.8030 | 0.1513 | 4.1883   |
| IschemicStroke | log_g_Finegoldia     | Weighted mode             | 31 | 0.2787  | 0.5541 | 0.6187 | -0.0190 | 0.0476 | 0.6925 | 36.8030 | 0.1513 | 4.1883   |
| IschemicStroke | log_g_Gardnerella    | MR Egger                  | 31 | 0.1961  | 0.5937 | 0.7435 | -0.0203 | 0.0425 | 0.6370 | 24.0765 | 0.7252 | 3.7694   |
| IschemicStroke | log_g_Gardnerella    | Weighted median           | 31 | 0.1805  | 0.3271 | 0.5810 | -0.0203 | 0.0425 | 0.6370 | 24.0765 | 0.7252 | 3.7694   |
| IschemicStroke | log_g_Gardnerella    | Inverse variance weighted | 31 | -0.0667 | 0.2206 | 0.7623 | -0.0203 | 0.0425 | 0.6370 | 24.0765 | 0.7252 | 3.7694   |
| IschemicStroke | log_g_Gardnerella    | Simple mode               | 31 | 0.3650  | 0.5634 | 0.5220 | -0.0203 | 0.0425 | 0.6370 | 24.0765 | 0.7252 | 3.7694   |
| IschemicStroke | log_g_Gardnerella    | Weighted mode             | 31 | 0.2658  | 0.4476 | 0.5571 | -0.0203 | 0.0425 | 0.6370 | 24.0765 | 0.7252 | 3.7694   |
| IschemicStroke | log_g_Helicobacter   | MR Egger                  | 31 | -0.4244 | 0.5890 | 0.4770 | 0.0414  | 0.0422 | 0.3343 | 26.8341 | 0.6320 | 13.4493  |
| IschemicStroke | log_g_Helicobacter   | Weighted median           | 31 | -0.1599 | 0.3226 | 0.6201 | 0.0414  | 0.0422 | 0.3343 | 26.8341 | 0.6320 | 13.4493  |
| IschemicStroke | log_g_Helicobacter   | Inverse variance weighted | 31 | 0.1126  | 0.2189 | 0.6070 | 0.0414  | 0.0422 | 0.3343 | 26.8341 | 0.6320 | 13.4493  |
| IschemicStroke | log_g_Helicobacter   | Simple mode               | 31 | -0.2748 | 0.5037 | 0.5894 | 0.0414  | 0.0422 | 0.3343 | 26.8341 | 0.6320 | 13.4493  |
| IschemicStroke | log_g_Helicobacter   | Weighted mode             | 31 | -0.2596 | 0.3956 | 0.5167 | 0.0414  | 0.0422 | 0.3343 | 26.8341 | 0.6320 | 13.4493  |
| IschemicStroke | log_g_Histophilus    | MR Egger                  | 31 | 0.6653  | 0.5848 | 0.2645 | -0.0398 | 0.0418 | 0.3495 | 29.1608 | 0.4567 | 4.9101   |
| IschemicStroke | log_g_Histophilus    | Weighted median           | 31 | 0.2680  | 0.3162 | 0.3967 | -0.0398 | 0.0418 | 0.3495 | 29.1608 | 0.4567 | 4.9101   |
| IschemicStroke | log_g_Histophilus    | Inverse variance weighted | 31 | 0.1490  | 0.2166 | 0.4915 | -0.0398 | 0.0418 | 0.3495 | 29.1608 | 0.4567 | 4.9101   |
| IschemicStroke | log_g_Histophilus    | Simple mode               | 31 | 0.0759  | 0.6094 | 0.9018 | -0.0398 | 0.0418 | 0.3495 | 29.1608 | 0.4567 | 4.9101   |
| IschemicStroke | log_g_Histophilus    | Weighted mode             | 31 | 0.3097  | 0.4703 | 0.5152 | -0.0398 | 0.0418 | 0.3495 | 29.1608 | 0.4567 | 4.9101   |

|                |                         |                           |    |         |        |        |         |        |        |         |        |         |
|----------------|-------------------------|---------------------------|----|---------|--------|--------|---------|--------|--------|---------|--------|---------|
| IschemicStroke | log_g_Kingella          | MR Egger                  | 31 | -0.5522 | 0.5822 | 0.3507 | 0.0324  | 0.0417 | 0.4425 | 27.7944 | 0.5289 | 3.5134  |
| IschemicStroke | log_g_Kingella          | Weighted median           | 31 | -0.0381 | 0.2957 | 0.8976 | 0.0324  | 0.0417 | 0.4425 | 27.7944 | 0.5289 | 3.5134  |
| IschemicStroke | log_g_Kingella          | Inverse variance weighted | 31 | -0.1312 | 0.2161 | 0.5437 | 0.0324  | 0.0417 | 0.4425 | 27.7944 | 0.5289 | 3.5134  |
| IschemicStroke | log_g_Kingella          | Simple mode               | 31 | 0.1382  | 0.5393 | 0.7994 | 0.0324  | 0.0417 | 0.4425 | 27.7944 | 0.5289 | 3.5134  |
| IschemicStroke | log_g_Kingella          | Weighted mode             | 31 | 0.2016  | 0.4531 | 0.6596 | 0.0324  | 0.0417 | 0.4425 | 27.7944 | 0.5289 | 3.5134  |
| IschemicStroke | log_g_Lawsonia          | MR Egger                  | 31 | -0.0899 | 0.6235 | 0.8864 | -0.0017 | 0.0447 | 0.9697 | 32.1182 | 0.3147 | 2.5140  |
| IschemicStroke | log_g_Lawsonia          | Weighted median           | 31 | 0.2434  | 0.3293 | 0.4598 | -0.0017 | 0.0447 | 0.9697 | 32.1182 | 0.3147 | 2.5140  |
| IschemicStroke | log_g_Lawsonia          | Inverse variance weighted | 31 | -0.1120 | 0.2281 | 0.6232 | -0.0017 | 0.0447 | 0.9697 | 32.1182 | 0.3147 | 2.5140  |
| IschemicStroke | log_g_Lawsonia          | Simple mode               | 31 | 0.4895  | 0.6085 | 0.4274 | -0.0017 | 0.0447 | 0.9697 | 32.1182 | 0.3147 | 2.5140  |
| IschemicStroke | log_g_Lawsonia          | Weighted mode             | 31 | 0.3346  | 0.4793 | 0.4905 | -0.0017 | 0.0447 | 0.9697 | 32.1182 | 0.3147 | 2.5140  |
| IschemicStroke | log_g_Leuconostoc       | MR Egger                  | 31 | 0.3833  | 0.5895 | 0.5207 | -0.0117 | 0.0422 | 0.7844 | 21.8174 | 0.8277 | 1.4990  |
| IschemicStroke | log_g_Leuconostoc       | Weighted median           | 31 | 0.3043  | 0.3131 | 0.3310 | -0.0117 | 0.0422 | 0.7844 | 21.8174 | 0.8277 | 1.4990  |
| IschemicStroke | log_g_Leuconostoc       | Inverse variance weighted | 31 | 0.2322  | 0.2189 | 0.2889 | -0.0117 | 0.0422 | 0.7844 | 21.8174 | 0.8277 | 1.4990  |
| IschemicStroke | log_g_Leuconostoc       | Simple mode               | 31 | -0.2866 | 0.6098 | 0.6417 | -0.0117 | 0.0422 | 0.7844 | 21.8174 | 0.8277 | 1.4990  |
| IschemicStroke | log_g_Leuconostoc       | Weighted mode             | 31 | 0.0983  | 0.4578 | 0.8314 | -0.0117 | 0.0422 | 0.7844 | 21.8174 | 0.8277 | 1.4990  |
| IschemicStroke | log_g_Methylobacillus   | MR Egger                  | 31 | -0.4164 | 0.5825 | 0.4804 | 0.0198  | 0.0417 | 0.6387 | 23.7042 | 0.7434 | 3.4727  |
| IschemicStroke | log_g_Methylobacillus   | Weighted median           | 31 | -0.3169 | 0.2954 | 0.2834 | 0.0198  | 0.0417 | 0.6387 | 23.7042 | 0.7434 | 3.4727  |
| IschemicStroke | log_g_Methylobacillus   | Inverse variance weighted | 31 | -0.1598 | 0.2163 | 0.4601 | 0.0198  | 0.0417 | 0.6387 | 23.7042 | 0.7434 | 3.4727  |
| IschemicStroke | log_g_Methylobacillus   | Simple mode               | 31 | -0.4130 | 0.5029 | 0.4179 | 0.0198  | 0.0417 | 0.6387 | 23.7042 | 0.7434 | 3.4727  |
| IschemicStroke | log_g_Methylobacillus   | Weighted mode             | 31 | -0.3350 | 0.4260 | 0.4378 | 0.0198  | 0.0417 | 0.6387 | 23.7042 | 0.7434 | 3.4727  |
| IschemicStroke | log_g_Olsenella         | MR Egger                  | 31 | 1.8088  | 0.5967 | 0.0051 | -0.1085 | 0.0426 | 0.0164 | 25.6299 | 0.6939 | 9.0563  |
| IschemicStroke | log_g_Olsenella         | Weighted median           | 31 | 0.2693  | 0.3230 | 0.4043 | -0.1085 | 0.0426 | 0.0164 | 25.6299 | 0.6939 | 9.0563  |
| IschemicStroke | log_g_Olsenella         | Inverse variance weighted | 31 | 0.3949  | 0.2192 | 0.0716 | -0.1085 | 0.0426 | 0.0164 | 25.6299 | 0.6939 | 9.0563  |
| IschemicStroke | log_g_Olsenella         | Simple mode               | 31 | 0.0345  | 0.6915 | 0.9605 | -0.1085 | 0.0426 | 0.0164 | 25.6299 | 0.6939 | 9.0563  |
| IschemicStroke | log_g_Olsenella         | Weighted mode             | 31 | 0.3239  | 0.5761 | 0.5782 | -0.1085 | 0.0426 | 0.0164 | 25.6299 | 0.6939 | 9.0563  |
| IschemicStroke | log_g_Ornithinibacillus | MR Egger                  | 31 | 0.0997  | 0.5849 | 0.8658 | -0.0041 | 0.0419 | 0.9222 | 27.0478 | 0.5691 | 1.6782  |
| IschemicStroke | log_g_Ornithinibacillus | Weighted median           | 31 | 0.2196  | 0.3120 | 0.4814 | -0.0041 | 0.0419 | 0.9222 | 27.0478 | 0.5691 | 1.6782  |
| IschemicStroke | log_g_Ornithinibacillus | Inverse variance weighted | 31 | 0.0462  | 0.2172 | 0.8316 | -0.0041 | 0.0419 | 0.9222 | 27.0478 | 0.5691 | 1.6782  |
| IschemicStroke | log_g_Ornithinibacillus | Simple mode               | 31 | 0.2974  | 0.5622 | 0.6007 | -0.0041 | 0.0419 | 0.9222 | 27.0478 | 0.5691 | 1.6782  |
| IschemicStroke | log_g_Ornithinibacillus | Weighted mode             | 31 | 0.2640  | 0.4738 | 0.5815 | -0.0041 | 0.0419 | 0.9222 | 27.0478 | 0.5691 | 1.6782  |
| IschemicStroke | log_g_Paenibacillus     | MR Egger                  | 31 | 0.9102  | 0.6224 | 0.1544 | -0.0685 | 0.0445 | 0.1347 | 34.6469 | 0.2557 | 16.6053 |
| IschemicStroke | log_g_Paenibacillus     | Weighted median           | 31 | 0.3274  | 0.3402 | 0.3358 | -0.0685 | 0.0445 | 0.1347 | 34.6469 | 0.2557 | 16.6053 |
| IschemicStroke | log_g_Paenibacillus     | Inverse variance weighted | 31 | 0.0203  | 0.2354 | 0.9313 | -0.0685 | 0.0445 | 0.1347 | 34.6469 | 0.2557 | 16.6053 |
| IschemicStroke | log_g_Paenibacillus     | Simple mode               | 31 | 0.2781  | 0.6145 | 0.6541 | -0.0685 | 0.0445 | 0.1347 | 34.6469 | 0.2557 | 16.6053 |
| IschemicStroke | log_g_Paenibacillus     | Weighted mode             | 31 | 0.4184  | 0.4874 | 0.3975 | -0.0685 | 0.0445 | 0.1347 | 34.6469 | 0.2557 | 16.6053 |
| IschemicStroke | log_g_Pantoea           | MR Egger                  | 31 | 0.1992  | 0.5816 | 0.7344 | -0.0453 | 0.0417 | 0.2854 | 26.7929 | 0.6341 | 1.6271  |
| IschemicStroke | log_g_Pantoea           | Weighted median           | 31 | -0.2772 | 0.3129 | 0.3757 | -0.0453 | 0.0417 | 0.2854 | 26.7929 | 0.6341 | 1.6271  |
| IschemicStroke | log_g_Pantoea           | Inverse variance weighted | 31 | -0.3885 | 0.2162 | 0.0724 | -0.0453 | 0.0417 | 0.2854 | 26.7929 | 0.6341 | 1.6271  |
| IschemicStroke | log_g_Pantoea           | Simple mode               | 31 | -0.3812 | 0.5878 | 0.5216 | -0.0453 | 0.0417 | 0.2854 | 26.7929 | 0.6341 | 1.6271  |
| IschemicStroke | log_g_Pantoea           | Weighted mode             | 31 | -0.2146 | 0.4575 | 0.6424 | -0.0453 | 0.0417 | 0.2854 | 26.7929 | 0.6341 | 1.6271  |
| IschemicStroke | log_g_Pectobacterium    | MR Egger                  | 31 | 0.8384  | 0.5966 | 0.1705 | -0.0553 | 0.0427 | 0.2059 | 32.4718 | 0.3459 | 2.7909  |
| IschemicStroke | log_g_Pectobacterium    | Weighted median           | 31 | 0.3737  | 0.3249 | 0.2501 | -0.0553 | 0.0427 | 0.2059 | 32.4718 | 0.3459 | 2.7909  |
| IschemicStroke | log_g_Pectobacterium    | Inverse variance weighted | 31 | 0.1217  | 0.2241 | 0.5870 | -0.0553 | 0.0427 | 0.2059 | 32.4718 | 0.3459 | 2.7909  |
| IschemicStroke | log_g_Pectobacterium    | Simple mode               | 31 | 0.5110  | 0.5546 | 0.3643 | -0.0553 | 0.0427 | 0.2059 | 32.4718 | 0.3459 | 2.7909  |
| IschemicStroke | log_g_Pectobacterium    | Weighted mode             | 31 | 0.3706  | 0.4444 | 0.4110 | -0.0553 | 0.0427 | 0.2059 | 32.4718 | 0.3459 | 2.7909  |
| IschemicStroke | log_g_Pseudoramibacter  | MR Egger                  | 31 | -0.1332 | 0.6317 | 0.8345 | 0.0117  | 0.0452 | 0.7982 | 33.6357 | 0.2528 | 1.2495  |
| IschemicStroke | log_g_Pseudoramibacter  | Weighted median           | 31 | 0.0865  | 0.3390 | 0.7986 | 0.0117  | 0.0452 | 0.7982 | 33.6357 | 0.2528 | 1.2495  |
| IschemicStroke | log_g_Pseudoramibacter  | Inverse variance weighted | 31 | 0.0182  | 0.2308 | 0.9372 | 0.0117  | 0.0452 | 0.7982 | 33.6357 | 0.2528 | 1.2495  |
| IschemicStroke | log_g_Pseudoramibacter  | Simple mode               | 31 | 0.1916  | 0.6494 | 0.7700 | 0.0117  | 0.0452 | 0.7982 | 33.6357 | 0.2528 | 1.2495  |
| IschemicStroke | log_g_Pseudoramibacter  | Weighted mode             | 31 | 0.1744  | 0.5236 | 0.7414 | 0.0117  | 0.0452 | 0.7982 | 33.6357 | 0.2528 | 1.2495  |
| IschemicStroke | log_g_Rahnella          | MR Egger                  | 31 | 0.7989  | 0.5872 | 0.1841 | -0.0770 | 0.0420 | 0.0770 | 33.1107 | 0.3178 | 32.1356 |
| IschemicStroke | log_g_Rahnella          | Weighted median           | 31 | 0.1160  | 0.3188 | 0.7160 | -0.0770 | 0.0420 | 0.0770 | 33.1107 | 0.3178 | 32.1356 |
| IschemicStroke | log_g_Rahnella          | Inverse variance weighted | 31 | -0.2012 | 0.2261 | 0.3737 | -0.0770 | 0.0420 | 0.0770 | 33.1107 | 0.3178 | 32.1356 |
| IschemicStroke | log_g_Rahnella          | Simple mode               | 31 | -0.1182 | 0.6434 | 0.8555 | -0.0770 | 0.0420 | 0.0770 | 33.1107 | 0.3178 | 32.1356 |
| IschemicStroke | log_g_Rahnella          | Weighted mode             | 31 | 0.1796  | 0.4072 | 0.6623 | -0.0770 | 0.0420 | 0.0770 | 33.1107 | 0.3178 | 32.1356 |
| IschemicStroke | log_g_Selenomonas       | MR Egger                  | 31 | -1.5846 | 0.6633 | 0.0236 | 0.1166  | 0.0474 | 0.0202 | 45.8221 | 0.0323 | 13.2583 |
| IschemicStroke | log_g_Selenomonas       | Weighted median           | 31 | -0.0771 | 0.3438 | 0.8225 | 0.1166  | 0.0474 | 0.0202 | 45.8221 | 0.0323 | 13.2583 |
| IschemicStroke | log_g_Selenomonas       | Inverse variance weighted | 31 | -0.0710 | 0.2657 | 0.7894 | 0.1166  | 0.0474 | 0.0202 | 45.8221 | 0.0323 | 13.2583 |
| IschemicStroke | log_g_Selenomonas       | Simple mode               | 31 | -0.1679 | 0.8294 | 0.8410 | 0.1166  | 0.0474 | 0.0202 | 45.8221 | 0.0323 | 13.2583 |
| IschemicStroke | log_g_Selenomonas       | Weighted mode             | 31 | -0.0565 | 0.7572 | 0.9410 | 0.1166  | 0.0474 | 0.0202 | 45.8221 | 0.0323 | 13.2583 |
| IschemicStroke | log_g_Serratia          | MR Egger                  | 31 | 0.0424  | 0.5796 | 0.9422 | -0.0163 | 0.0415 | 0.6965 | 17.8291 | 0.9477 | 2.3411  |

|                |                             |                           |    |         |        |        |         |        |        |         |        |         |
|----------------|-----------------------------|---------------------------|----|---------|--------|--------|---------|--------|--------|---------|--------|---------|
| IschemicStroke | log_g_Serratia              | Weighted median           | 31 | -0.2788 | 0.3112 | 0.3703 | -0.0163 | 0.0415 | 0.6965 | 17.8291 | 0.9477 | 2.3411  |
| IschemicStroke | log_g_Serratia              | Inverse variance weighted | 31 | -0.1696 | 0.2152 | 0.4306 | -0.0163 | 0.0415 | 0.6965 | 17.8291 | 0.9477 | 2.3411  |
| IschemicStroke | log_g_Serratia              | Simple mode               | 31 | -0.4025 | 0.5992 | 0.5069 | -0.0163 | 0.0415 | 0.6965 | 17.8291 | 0.9477 | 2.3411  |
| IschemicStroke | log_g_Serratia              | Weighted mode             | 31 | -0.1471 | 0.5092 | 0.7747 | -0.0163 | 0.0415 | 0.6965 | 17.8291 | 0.9477 | 2.3411  |
| IschemicStroke | log_g_Shewanella            | MR Egger                  | 31 | 0.3561  | 0.6170 | 0.5683 | -0.0313 | 0.0442 | 0.4843 | 32.5401 | 0.2967 | 2.1927  |
| IschemicStroke | log_g_Shewanella            | Weighted median           | 31 | -0.0336 | 0.3220 | 0.9168 | -0.0313 | 0.0442 | 0.4843 | 32.5401 | 0.2967 | 2.1927  |
| IschemicStroke | log_g_Shewanella            | Inverse variance weighted | 31 | -0.0498 | 0.2273 | 0.8267 | -0.0313 | 0.0442 | 0.4843 | 32.5401 | 0.2967 | 2.1927  |
| IschemicStroke | log_g_Shewanella            | Simple mode               | 31 | -0.4577 | 0.6463 | 0.4843 | -0.0313 | 0.0442 | 0.4843 | 32.5401 | 0.2967 | 2.1927  |
| IschemicStroke | log_g_Shewanella            | Weighted mode             | 31 | -0.1518 | 0.5506 | 0.7847 | -0.0313 | 0.0442 | 0.4843 | 32.5401 | 0.2967 | 2.1927  |
| IschemicStroke | log_g_Slackia               | MR Egger                  | 31 | 0.4551  | 0.5849 | 0.4429 | -0.0094 | 0.0419 | 0.8242 | 28.9475 | 0.4678 | 1.5846  |
| IschemicStroke | log_g_Slackia               | Weighted median           | 31 | 0.5677  | 0.3104 | 0.0674 | -0.0094 | 0.0419 | 0.8242 | 28.9475 | 0.4678 | 1.5846  |
| IschemicStroke | log_g_Slackia               | Inverse variance weighted | 31 | 0.3333  | 0.2172 | 0.1250 | -0.0094 | 0.0419 | 0.8242 | 28.9475 | 0.4678 | 1.5846  |
| IschemicStroke | log_g_Slackia               | Simple mode               | 31 | 0.6278  | 0.5463 | 0.2595 | -0.0094 | 0.0419 | 0.8242 | 28.9475 | 0.4678 | 1.5846  |
| IschemicStroke | log_g_Slackia               | Weighted mode             | 31 | 0.6440  | 0.4770 | 0.1871 | -0.0094 | 0.0419 | 0.8242 | 28.9475 | 0.4678 | 1.5846  |
| IschemicStroke | log_g_Sodalis               | MR Egger                  | 31 | 0.5920  | 0.5806 | 0.3163 | -0.0334 | 0.0416 | 0.4286 | 28.5417 | 0.4891 | 1.2614  |
| IschemicStroke | log_g_Sodalis               | Weighted median           | 31 | 0.2270  | 0.3224 | 0.4813 | -0.0334 | 0.0416 | 0.4286 | 28.5417 | 0.4891 | 1.2614  |
| IschemicStroke | log_g_Sodalis               | Inverse variance weighted | 31 | 0.1593  | 0.2159 | 0.4606 | -0.0334 | 0.0416 | 0.4286 | 28.5417 | 0.4891 | 1.2614  |
| IschemicStroke | log_g_Sodalis               | Simple mode               | 31 | 0.1871  | 0.5978 | 0.7564 | -0.0334 | 0.0416 | 0.4286 | 28.5417 | 0.4891 | 1.2614  |
| IschemicStroke | log_g_Sodalis               | Weighted mode             | 31 | 0.4040  | 0.4660 | 0.3929 | -0.0334 | 0.0416 | 0.4286 | 28.5417 | 0.4891 | 1.2614  |
| IschemicStroke | log_g_Thauera               | MR Egger                  | 31 | -0.4185 | 0.6854 | 0.5462 | 0.0316  | 0.0491 | 0.5248 | 40.5928 | 0.0747 | 4.8580  |
| IschemicStroke | log_g_Thauera               | Weighted median           | 31 | 0.2887  | 0.3334 | 0.3867 | 0.0316  | 0.0491 | 0.5248 | 40.5928 | 0.0747 | 4.8580  |
| IschemicStroke | log_g_Thauera               | Inverse variance weighted | 31 | -0.0088 | 0.2519 | 0.9721 | 0.0316  | 0.0491 | 0.5248 | 40.5928 | 0.0747 | 4.8580  |
| IschemicStroke | log_g_Thauera               | Simple mode               | 31 | 0.5002  | 0.6194 | 0.4257 | 0.0316  | 0.0491 | 0.5248 | 40.5928 | 0.0747 | 4.8580  |
| IschemicStroke | log_g_Thauera               | Weighted mode             | 31 | 0.4621  | 0.5144 | 0.3761 | 0.0316  | 0.0491 | 0.5248 | 40.5928 | 0.0747 | 4.8580  |
| IschemicStroke | log_g_Thermoanaerobacter    | MR Egger                  | 31 | -0.1506 | 0.7045 | 0.8322 | -0.0030 | 0.0504 | 0.9522 | 41.1298 | 0.0671 | 1.5137  |
| IschemicStroke | log_g_Thermoanaerobacter    | Weighted median           | 31 | -0.4951 | 0.3492 | 0.1562 | -0.0030 | 0.0504 | 0.9522 | 41.1298 | 0.0671 | 1.5137  |
| IschemicStroke | log_g_Thermoanaerobacter    | Inverse variance weighted | 31 | -0.1901 | 0.2574 | 0.4600 | -0.0030 | 0.0504 | 0.9522 | 41.1298 | 0.0671 | 1.5137  |
| IschemicStroke | log_g_Thermoanaerobacter    | Simple mode               | 31 | -0.9060 | 0.6415 | 0.1682 | -0.0030 | 0.0504 | 0.9522 | 41.1298 | 0.0671 | 1.5137  |
| IschemicStroke | log_g_Thermoanaerobacter    | Weighted mode             | 31 | -0.6445 | 0.5011 | 0.2082 | -0.0030 | 0.0504 | 0.9522 | 41.1298 | 0.0671 | 1.5137  |
| IschemicStroke | log_g_Thermoanaerobacterium | MR Egger                  | 31 | 0.4751  | 0.6754 | 0.4874 | -0.0255 | 0.0483 | 0.6020 | 37.7851 | 0.1272 | 9.3387  |
| IschemicStroke | log_g_Thermoanaerobacterium | Weighted median           | 31 | 0.3335  | 0.3418 | 0.3293 | -0.0255 | 0.0483 | 0.6020 | 37.7851 | 0.1272 | 9.3387  |
| IschemicStroke | log_g_Thermoanaerobacterium | Inverse variance weighted | 31 | 0.1443  | 0.2471 | 0.5594 | -0.0255 | 0.0483 | 0.6020 | 37.7851 | 0.1272 | 9.3387  |
| IschemicStroke | log_g_Thermoanaerobacterium | Simple mode               | 31 | 0.3142  | 0.7271 | 0.6687 | -0.0255 | 0.0483 | 0.6020 | 37.7851 | 0.1272 | 9.3387  |
| IschemicStroke | log_g_Thermoanaerobacterium | Weighted mode             | 31 | 0.3495  | 0.4478 | 0.4412 | -0.0255 | 0.0483 | 0.6020 | 37.7851 | 0.1272 | 9.3387  |
| IschemicStroke | log_g_Thermosinus           | MR Egger                  | 31 | -0.5555 | 0.6787 | 0.4198 | 0.0775  | 0.0485 | 0.1210 | 42.3924 | 0.0662 | 15.7160 |
| IschemicStroke | log_g_Thermosinus           | Weighted median           | 31 | 0.4513  | 0.3279 | 0.1687 | 0.0775  | 0.0485 | 0.1210 | 42.3924 | 0.0662 | 15.7160 |
| IschemicStroke | log_g_Thermosinus           | Inverse variance weighted | 31 | 0.4521  | 0.2572 | 0.0788 | 0.0775  | 0.0485 | 0.1210 | 42.3924 | 0.0662 | 15.7160 |
| IschemicStroke | log_g_Thermosinus           | Simple mode               | 31 | 1.0880  | 0.7077 | 0.1347 | 0.0775  | 0.0485 | 0.1210 | 42.3924 | 0.0662 | 15.7160 |
| IschemicStroke | log_g_Thermosinus           | Weighted mode             | 31 | 0.7099  | 0.6054 | 0.2502 | 0.0775  | 0.0485 | 0.1210 | 42.3924 | 0.0662 | 15.7160 |
| IschemicStroke | log_g_Yersinia              | MR Egger                  | 31 | -0.0171 | 0.5775 | 0.9766 | -0.0062 | 0.0413 | 0.8820 | 25.3835 | 0.6582 | 1.6455  |
| IschemicStroke | log_g_Yersinia              | Weighted median           | 31 | 0.0115  | 0.3168 | 0.9712 | -0.0062 | 0.0413 | 0.8820 | 25.3835 | 0.6582 | 1.6455  |
| IschemicStroke | log_g_Yersinia              | Inverse variance weighted | 31 | -0.0974 | 0.2145 | 0.6497 | -0.0062 | 0.0413 | 0.8820 | 25.3835 | 0.6582 | 1.6455  |
| IschemicStroke | log_g_Yersinia              | Simple mode               | 31 | -0.0467 | 0.5341 | 0.9309 | -0.0062 | 0.0413 | 0.8820 | 25.3835 | 0.6582 | 1.6455  |
| IschemicStroke | log_g_Yersinia              | Weighted mode             | 31 | 0.0475  | 0.4455 | 0.9158 | -0.0062 | 0.0413 | 0.8820 | 25.3835 | 0.6582 | 1.6455  |
| IschemicStroke | log_o_Aeromonadales         | MR Egger                  | 31 | 0.6548  | 0.6214 | 0.3007 | -0.0303 | 0.0445 | 0.5014 | 33.1349 | 0.2723 | 2.5166  |
| IschemicStroke | log_o_Aeromonadales         | Weighted median           | 31 | 0.2283  | 0.3196 | 0.4750 | -0.0303 | 0.0445 | 0.5014 | 33.1349 | 0.2723 | 2.5166  |
| IschemicStroke | log_o_Aeromonadales         | Inverse variance weighted | 31 | 0.2620  | 0.2287 | 0.2520 | -0.0303 | 0.0445 | 0.5014 | 33.1349 | 0.2723 | 2.5166  |
| IschemicStroke | log_o_Aeromonadales         | Simple mode               | 31 | 0.2315  | 0.6176 | 0.7104 | -0.0303 | 0.0445 | 0.5014 | 33.1349 | 0.2723 | 2.5166  |
| IschemicStroke | log_o_Aeromonadales         | Weighted mode             | 31 | 0.2315  | 0.5626 | 0.6837 | -0.0303 | 0.0445 | 0.5014 | 33.1349 | 0.2723 | 2.5166  |
| IschemicStroke | log_o_Alteromonadales       | MR Egger                  | 31 | 0.2144  | 0.5822 | 0.7154 | -0.0253 | 0.0417 | 0.5482 | 28.0259 | 0.5165 | 1.4333  |
| IschemicStroke | log_o_Alteromonadales       | Weighted median           | 31 | -0.1331 | 0.3257 | 0.6828 | -0.0253 | 0.0417 | 0.5482 | 28.0259 | 0.5165 | 1.4333  |
| IschemicStroke | log_o_Alteromonadales       | Inverse variance weighted | 31 | -0.1140 | 0.2162 | 0.5980 | -0.0253 | 0.0417 | 0.5482 | 28.0259 | 0.5165 | 1.4333  |
| IschemicStroke | log_o_Alteromonadales       | Simple mode               | 31 | -0.1069 | 0.6718 | 0.8746 | -0.0253 | 0.0417 | 0.5482 | 28.0259 | 0.5165 | 1.4333  |
| IschemicStroke | log_o_Alteromonadales       | Weighted mode             | 31 | -0.0738 | 0.6015 | 0.9031 | -0.0253 | 0.0417 | 0.5482 | 28.0259 | 0.5165 | 1.4333  |
| IschemicStroke | log_o_Caulobacterales       | MR Egger                  | 31 | 0.7438  | 0.7267 | 0.3145 | -0.0325 | 0.0520 | 0.5368 | 43.9655 | 0.0370 | 3.1752  |
| IschemicStroke | log_o_Caulobacterales       | Weighted median           | 31 | 0.5488  | 0.3172 | 0.0836 | -0.0325 | 0.0520 | 0.5368 | 43.9655 | 0.0370 | 3.1752  |
| IschemicStroke | log_o_Caulobacterales       | Inverse variance weighted | 31 | 0.3219  | 0.2667 | 0.2274 | -0.0325 | 0.0520 | 0.5368 | 43.9655 | 0.0370 | 3.1752  |
| IschemicStroke | log_o_Caulobacterales       | Simple mode               | 31 | 0.6937  | 0.5883 | 0.2476 | -0.0325 | 0.0520 | 0.5368 | 43.9655 | 0.0370 | 3.1752  |
| IschemicStroke | log_o_Caulobacterales       | Weighted mode             | 31 | 0.8271  | 0.4284 | 0.0630 | -0.0325 | 0.0520 | 0.5368 | 43.9655 | 0.0370 | 3.1752  |
| IschemicStroke | log_o_Chromatiales          | MR Egger                  | 31 | -0.1795 | 0.5786 | 0.7585 | 0.0351  | 0.0414 | 0.4033 | 21.8011 | 0.8283 | 3.4552  |
| IschemicStroke | log_o_Chromatiales          | Weighted median           | 31 | 0.0555  | 0.2983 | 0.8524 | 0.0351  | 0.0414 | 0.4033 | 21.8011 | 0.8283 | 3.4552  |

|                |                                  |                           |    |         |        |        |         |        |        |         |        |         |
|----------------|----------------------------------|---------------------------|----|---------|--------|--------|---------|--------|--------|---------|--------|---------|
| IschemicStroke | log_o_Chromatiales               | Inverse variance weighted | 31 | 0.2760  | 0.2152 | 0.1995 | 0.0351  | 0.0414 | 0.4033 | 21.8011 | 0.8283 | 3.4552  |
| IschemicStroke | log_o_Chromatiales               | Simple mode               | 31 | 0.1470  | 0.5414 | 0.7879 | 0.0351  | 0.0414 | 0.4033 | 21.8011 | 0.8283 | 3.4552  |
| IschemicStroke | log_o_Chromatiales               | Weighted mode             | 31 | -0.0205 | 0.4279 | 0.9621 | 0.0351  | 0.0414 | 0.4033 | 21.8011 | 0.8283 | 3.4552  |
| IschemicStroke | log_o_Rhizobiales                | MR Egger                  | 31 | 0.1125  | 0.5795 | 0.8475 | -0.0174 | 0.0415 | 0.6773 | 16.7026 | 0.9666 | 1.8023  |
| IschemicStroke | log_o_Rhizobiales                | Weighted median           | 31 | -0.0971 | 0.3124 | 0.7559 | -0.0174 | 0.0415 | 0.6773 | 16.7026 | 0.9666 | 1.8023  |
| IschemicStroke | log_o_Rhizobiales                | Inverse variance weighted | 31 | -0.1137 | 0.2153 | 0.5976 | -0.0174 | 0.0415 | 0.6773 | 16.7026 | 0.9666 | 1.8023  |
| IschemicStroke | log_o_Rhizobiales                | Simple mode               | 31 | -0.2568 | 0.5943 | 0.6687 | -0.0174 | 0.0415 | 0.6773 | 16.7026 | 0.9666 | 1.8023  |
| IschemicStroke | log_o_Rhizobiales                | Weighted mode             | 31 | 0.2653  | 0.4826 | 0.5865 | -0.0174 | 0.0415 | 0.6773 | 16.7026 | 0.9666 | 1.8023  |
| IschemicStroke | log_o_Thermoanaerobacterales     | MR Egger                  | 31 | -0.0204 | 0.6857 | 0.9764 | 0.0022  | 0.0491 | 0.9642 | 38.9753 | 0.1021 | 3.6870  |
| IschemicStroke | log_o_Thermoanaerobacterales     | Weighted median           | 31 | 0.1478  | 0.3365 | 0.6606 | 0.0022  | 0.0491 | 0.9642 | 38.9753 | 0.1021 | 3.6870  |
| IschemicStroke | log_o_Thermoanaerobacterales     | Inverse variance weighted | 31 | 0.0084  | 0.2503 | 0.9733 | 0.0022  | 0.0491 | 0.9642 | 38.9753 | 0.1021 | 3.6870  |
| IschemicStroke | log_o_Thermoanaerobacterales     | Simple mode               | 31 | 1.0209  | 0.7137 | 0.1629 | 0.0022  | 0.0491 | 0.9642 | 38.9753 | 0.1021 | 3.6870  |
| IschemicStroke | log_o_Thermoanaerobacterales     | Weighted mode             | 31 | 0.2017  | 0.5470 | 0.7150 | 0.0022  | 0.0491 | 0.9642 | 38.9753 | 0.1021 | 3.6870  |
| IschemicStroke | log_p_Chloroflexi                | MR Egger                  | 31 | 0.5312  | 0.5853 | 0.3716 | -0.0371 | 0.0419 | 0.3827 | 23.7876 | 0.7393 | 2.0396  |
| IschemicStroke | log_p_Chloroflexi                | Weighted median           | 31 | 0.1991  | 0.3066 | 0.5160 | -0.0371 | 0.0419 | 0.3827 | 23.7876 | 0.7393 | 2.0396  |
| IschemicStroke | log_p_Chloroflexi                | Inverse variance weighted | 31 | 0.0496  | 0.2174 | 0.8196 | -0.0371 | 0.0419 | 0.3827 | 23.7876 | 0.7393 | 2.0396  |
| IschemicStroke | log_p_Chloroflexi                | Simple mode               | 31 | 0.2404  | 0.6089 | 0.6957 | -0.0371 | 0.0419 | 0.3827 | 23.7876 | 0.7393 | 2.0396  |
| IschemicStroke | log_p_Chloroflexi                | Weighted mode             | 31 | 0.3326  | 0.4558 | 0.4712 | -0.0371 | 0.0419 | 0.3827 | 23.7876 | 0.7393 | 2.0396  |
| IschemicStroke | log_p_Cyanobacteria              | MR Egger                  | 31 | 1.0417  | 0.5818 | 0.0838 | -0.0661 | 0.0416 | 0.1234 | 29.3084 | 0.5014 | 3.3660  |
| IschemicStroke | log_p_Cyanobacteria              | Weighted median           | 31 | 0.0587  | 0.3068 | 0.8482 | -0.0661 | 0.0416 | 0.1234 | 29.3084 | 0.5014 | 3.3660  |
| IschemicStroke | log_p_Cyanobacteria              | Inverse variance weighted | 31 | 0.1845  | 0.2162 | 0.3934 | -0.0661 | 0.0416 | 0.1234 | 29.3084 | 0.5014 | 3.3660  |
| IschemicStroke | log_p_Cyanobacteria              | Simple mode               | 31 | 0.0396  | 0.5712 | 0.9452 | -0.0661 | 0.0416 | 0.1234 | 29.3084 | 0.5014 | 3.3660  |
| IschemicStroke | log_p_Cyanobacteria              | Weighted mode             | 31 | 0.0743  | 0.4835 | 0.8788 | -0.0661 | 0.0416 | 0.1234 | 29.3084 | 0.5014 | 3.3660  |
| IschemicStroke | log_p_Euryarchaeota              | MR Egger                  | 31 | 0.4537  | 0.6317 | 0.4784 | -0.0508 | 0.0452 | 0.2702 | 35.2095 | 0.2351 | 4.4409  |
| IschemicStroke | log_p_Euryarchaeota              | Weighted median           | 31 | -0.0409 | 0.3279 | 0.9008 | -0.0508 | 0.0452 | 0.2702 | 35.2095 | 0.2351 | 4.4409  |
| IschemicStroke | log_p_Euryarchaeota              | Inverse variance weighted | 31 | -0.2056 | 0.2355 | 0.3825 | -0.0508 | 0.0452 | 0.2702 | 35.2095 | 0.2351 | 4.4409  |
| IschemicStroke | log_p_Euryarchaeota              | Simple mode               | 31 | 0.1429  | 0.6242 | 0.8205 | -0.0508 | 0.0452 | 0.2702 | 35.2095 | 0.2351 | 4.4409  |
| IschemicStroke | log_p_Euryarchaeota              | Weighted mode             | 31 | 0.1203  | 0.4707 | 0.7999 | -0.0508 | 0.0452 | 0.2702 | 35.2095 | 0.2351 | 4.4409  |
| IschemicStroke | log_p_Fibrobacteres              | MR Egger                  | 31 | 0.0630  | 0.5923 | 0.9160 | -0.0136 | 0.0424 | 0.7509 | 26.9622 | 0.5737 | 2.4622  |
| IschemicStroke | log_p_Fibrobacteres              | Weighted median           | 31 | -0.2529 | 0.3314 | 0.4455 | -0.0136 | 0.0424 | 0.7509 | 26.9622 | 0.5737 | 2.4622  |
| IschemicStroke | log_p_Fibrobacteres              | Inverse variance weighted | 31 | -0.1133 | 0.2197 | 0.6062 | -0.0136 | 0.0424 | 0.7509 | 26.9622 | 0.5737 | 2.4622  |
| IschemicStroke | log_p_Fibrobacteres              | Simple mode               | 31 | 0.7818  | 0.6474 | 0.2367 | -0.0136 | 0.0424 | 0.7509 | 26.9622 | 0.5737 | 2.4622  |
| IschemicStroke | log_p_Fibrobacteres              | Weighted mode             | 31 | 0.3776  | 0.5299 | 0.4816 | -0.0136 | 0.0424 | 0.7509 | 26.9622 | 0.5737 | 2.4622  |
| IschemicStroke | log_p_Tenericutes                | MR Egger                  | 31 | 0.3410  | 0.5844 | 0.5641 | -0.0469 | 0.0419 | 0.2712 | 24.4429 | 0.7516 | 2.7352  |
| IschemicStroke | log_p_Tenericutes                | Weighted median           | 31 | -0.0914 | 0.3192 | 0.7746 | -0.0469 | 0.0419 | 0.2712 | 24.4429 | 0.7516 | 2.7352  |
| IschemicStroke | log_p_Tenericutes                | Inverse variance weighted | 31 | -0.2675 | 0.2172 | 0.2181 | -0.0469 | 0.0419 | 0.2712 | 24.4429 | 0.7516 | 2.7352  |
| IschemicStroke | log_p_Tenericutes                | Simple mode               | 31 | 0.2363  | 0.5877 | 0.6905 | -0.0469 | 0.0419 | 0.2712 | 24.4429 | 0.7516 | 2.7352  |
| IschemicStroke | log_p_Tenericutes                | Weighted mode             | 31 | 0.1365  | 0.4454 | 0.7614 | -0.0469 | 0.0419 | 0.2712 | 24.4429 | 0.7516 | 2.7352  |
| IschemicStroke | log_s_Abiotrophia_defectiva      | MR Egger                  | 31 | 0.9578  | 0.6483 | 0.1503 | -0.0457 | 0.0464 | 0.3325 | 37.4110 | 0.1655 | 79.5241 |
| IschemicStroke | log_s_Abiotrophia_defectiva      | Weighted median           | 31 | 0.3399  | 0.3244 | 0.2949 | -0.0457 | 0.0464 | 0.3325 | 37.4110 | 0.1655 | 79.5241 |
| IschemicStroke | log_s_Abiotrophia_defectiva      | Inverse variance weighted | 31 | 0.3643  | 0.2399 | 0.1288 | -0.0457 | 0.0464 | 0.3325 | 37.4110 | 0.1655 | 79.5241 |
| IschemicStroke | log_s_Abiotrophia_defectiva      | Simple mode               | 31 | -0.0578 | 0.6423 | 0.9289 | -0.0457 | 0.0464 | 0.3325 | 37.4110 | 0.1655 | 79.5241 |
| IschemicStroke | log_s_Abiotrophia_defectiva      | Weighted mode             | 31 | 0.3096  | 0.5014 | 0.5415 | -0.0457 | 0.0464 | 0.3325 | 37.4110 | 0.1655 | 79.5241 |
| IschemicStroke | log_s_Achromobacter_piechaudii   | MR Egger                  | 31 | 0.1294  | 0.5819 | 0.8256 | -0.0098 | 0.0416 | 0.8158 | 28.6750 | 0.4821 | 2.7401  |
| IschemicStroke | log_s_Achromobacter_piechaudii   | Weighted median           | 31 | 0.1724  | 0.3238 | 0.5945 | -0.0098 | 0.0416 | 0.8158 | 28.6750 | 0.4821 | 2.7401  |
| IschemicStroke | log_s_Achromobacter_piechaudii   | Inverse variance weighted | 31 | 0.0024  | 0.2157 | 0.9913 | -0.0098 | 0.0416 | 0.8158 | 28.6750 | 0.4821 | 2.7401  |
| IschemicStroke | log_s_Achromobacter_piechaudii   | Simple mode               | 31 | 0.4989  | 0.5941 | 0.4077 | -0.0098 | 0.0416 | 0.8158 | 28.6750 | 0.4821 | 2.7401  |
| IschemicStroke | log_s_Achromobacter_piechaudii   | Weighted mode             | 31 | 0.3981  | 0.4937 | 0.4264 | -0.0098 | 0.0416 | 0.8158 | 28.6750 | 0.4821 | 2.7401  |
| IschemicStroke | log_s_Acidaminococcus_intestini  | MR Egger                  | 31 | 0.7482  | 0.5828 | 0.2093 | -0.0155 | 0.0417 | 0.7130 | 24.4052 | 0.7087 | 6.6855  |
| IschemicStroke | log_s_Acidaminococcus_intestini  | Weighted median           | 31 | 0.8524  | 0.3143 | 0.0067 | -0.0155 | 0.0417 | 0.7130 | 24.4052 | 0.7087 | 6.6855  |
| IschemicStroke | log_s_Acidaminococcus_intestini  | Inverse variance weighted | 31 | 0.5472  | 0.2161 | 0.0114 | -0.0155 | 0.0417 | 0.7130 | 24.4052 | 0.7087 | 6.6855  |
| IschemicStroke | log_s_Acidaminococcus_intestini  | Simple mode               | 31 | 1.0091  | 0.6182 | 0.1131 | -0.0155 | 0.0417 | 0.7130 | 24.4052 | 0.7087 | 6.6855  |
| IschemicStroke | log_s_Acidaminococcus_intestini  | Weighted mode             | 31 | 0.9253  | 0.4901 | 0.0688 | -0.0155 | 0.0417 | 0.7130 | 24.4052 | 0.7087 | 6.6855  |
| IschemicStroke | log_s_Acinetobacter_baumannii    | MR Egger                  | 31 | -0.2001 | 0.5843 | 0.7345 | 0.0111  | 0.0418 | 0.7917 | 28.6330 | 0.4843 | 22.4958 |
| IschemicStroke | log_s_Acinetobacter_baumannii    | Weighted median           | 31 | -0.3339 | 0.3206 | 0.2976 | 0.0111  | 0.0418 | 0.7917 | 28.6330 | 0.4843 | 22.4958 |
| IschemicStroke | log_s_Acinetobacter_baumannii    | Inverse variance weighted | 31 | -0.0554 | 0.2165 | 0.7978 | 0.0111  | 0.0418 | 0.7917 | 28.6330 | 0.4843 | 22.4958 |
| IschemicStroke | log_s_Acinetobacter_baumannii    | Simple mode               | 31 | -0.7957 | 0.6998 | 0.2645 | 0.0111  | 0.0418 | 0.7917 | 28.6330 | 0.4843 | 22.4958 |
| IschemicStroke | log_s_Acinetobacter_baumannii    | Weighted mode             | 31 | -0.3704 | 0.4861 | 0.4520 | 0.0111  | 0.0418 | 0.7917 | 28.6330 | 0.4843 | 22.4958 |
| IschemicStroke | log_s_Acinetobacter_haemolyticus | MR Egger                  | 31 | -0.2891 | 0.5798 | 0.6218 | -0.0033 | 0.0415 | 0.9375 | 12.8787 | 0.9957 | 2.0819  |
| IschemicStroke | log_s_Acinetobacter_haemolyticus | Weighted median           | 31 | -0.1129 | 0.2969 | 0.7037 | -0.0033 | 0.0415 | 0.9375 | 12.8787 | 0.9957 | 2.0819  |
| IschemicStroke | log_s_Acinetobacter_haemolyticus | Inverse variance weighted | 31 | -0.3317 | 0.2154 | 0.1236 | -0.0033 | 0.0415 | 0.9375 | 12.8787 | 0.9957 | 2.0819  |

|                |                                   |                           |    |         |        |        |         |        |        |         |        |        |
|----------------|-----------------------------------|---------------------------|----|---------|--------|--------|---------|--------|--------|---------|--------|--------|
| IschemicStroke | log_s_Acinetobacter_haemolyticus  | Simple mode               | 31 | 0.0203  | 0.4929 | 0.9674 | -0.0033 | 0.0415 | 0.9375 | 12.8787 | 0.9957 | 2.0819 |
| IschemicStroke | log_s_Acinetobacter_haemolyticus  | Weighted mode             | 31 | -0.0294 | 0.4326 | 0.9462 | -0.0033 | 0.0415 | 0.9375 | 12.8787 | 0.9957 | 2.0819 |
| IschemicStroke | log_s_Aggregatibacter_aphrophilus | MR Egger                  | 31 | -0.3049 | 0.5876 | 0.6078 | 0.0185  | 0.0421 | 0.6630 | 25.8272 | 0.6347 | 1.9945 |
| IschemicStroke | log_s_Aggregatibacter_aphrophilus | Weighted median           | 31 | -0.0866 | 0.3141 | 0.7827 | 0.0185  | 0.0421 | 0.6630 | 25.8272 | 0.6347 | 1.9945 |
| IschemicStroke | log_s_Aggregatibacter_aphrophilus | Inverse variance weighted | 31 | -0.0647 | 0.2181 | 0.7669 | 0.0185  | 0.0421 | 0.6630 | 25.8272 | 0.6347 | 1.9945 |
| IschemicStroke | log_s_Aggregatibacter_aphrophilus | Simple mode               | 31 | -0.3354 | 0.5905 | 0.5743 | 0.0185  | 0.0421 | 0.6630 | 25.8272 | 0.6347 | 1.9945 |
| IschemicStroke | log_s_Aggregatibacter_aphrophilus | Weighted mode             | 31 | -0.1983 | 0.5210 | 0.7061 | 0.0185  | 0.0421 | 0.6630 | 25.8272 | 0.6347 | 1.9945 |
| IschemicStroke | log_s_Bifidobacterium_angulatum   | MR Egger                  | 31 | 0.4873  | 0.5982 | 0.4219 | -0.0442 | 0.0428 | 0.3110 | 27.5238 | 0.5957 | 3.9196 |
| IschemicStroke | log_s_Bifidobacterium_angulatum   | Weighted median           | 31 | 0.2334  | 0.3358 | 0.4870 | -0.0442 | 0.0428 | 0.3110 | 27.5238 | 0.5957 | 3.9196 |
| IschemicStroke | log_s_Bifidobacterium_angulatum   | Inverse variance weighted | 31 | -0.0854 | 0.2222 | 0.7007 | -0.0442 | 0.0428 | 0.3110 | 27.5238 | 0.5957 | 3.9196 |
| IschemicStroke | log_s_Bifidobacterium_angulatum   | Simple mode               | 31 | 0.4753  | 0.6813 | 0.4907 | -0.0442 | 0.0428 | 0.3110 | 27.5238 | 0.5957 | 3.9196 |
| IschemicStroke | log_s_Bifidobacterium_angulatum   | Weighted mode             | 31 | 0.2501  | 0.5184 | 0.6330 | -0.0442 | 0.0428 | 0.3110 | 27.5238 | 0.5957 | 3.9196 |
| IschemicStroke | log_s_Bifidobacterium_dentium     | MR Egger                  | 31 | -1.0180 | 0.5964 | 0.0985 | 0.0608  | 0.0426 | 0.1646 | 22.8608 | 0.8209 | 1.0805 |
| IschemicStroke | log_s_Bifidobacterium_dentium     | Weighted median           | 31 | -0.4182 | 0.3182 | 0.1887 | 0.0608  | 0.0426 | 0.1646 | 22.8608 | 0.8209 | 1.0805 |
| IschemicStroke | log_s_Bifidobacterium_dentium     | Inverse variance weighted | 31 | -0.2280 | 0.2207 | 0.3016 | 0.0608  | 0.0426 | 0.1646 | 22.8608 | 0.8209 | 1.0805 |
| IschemicStroke | log_s_Bifidobacterium_dentium     | Simple mode               | 31 | -0.4248 | 0.6042 | 0.4875 | 0.0608  | 0.0426 | 0.1646 | 22.8608 | 0.8209 | 1.0805 |
| IschemicStroke | log_s_Bifidobacterium_dentium     | Weighted mode             | 31 | -0.7292 | 0.5099 | 0.1630 | 0.0608  | 0.0426 | 0.1646 | 22.8608 | 0.8209 | 1.0805 |
| IschemicStroke | log_s_Brucella_melitensis         | MR Egger                  | 31 | 0.5139  | 0.6802 | 0.4560 | -0.0236 | 0.0487 | 0.6314 | 39.6928 | 0.0891 | 2.8134 |
| IschemicStroke | log_s_Brucella_melitensis         | Weighted median           | 31 | -0.0650 | 0.3393 | 0.8480 | -0.0236 | 0.0487 | 0.6314 | 39.6928 | 0.0891 | 2.8134 |
| IschemicStroke | log_s_Brucella_melitensis         | Inverse variance weighted | 31 | 0.2077  | 0.2495 | 0.4052 | -0.0236 | 0.0487 | 0.6314 | 39.6928 | 0.0891 | 2.8134 |
| IschemicStroke | log_s_Brucella_melitensis         | Simple mode               | 31 | -0.4597 | 0.7153 | 0.5253 | -0.0236 | 0.0487 | 0.6314 | 39.6928 | 0.0891 | 2.8134 |
| IschemicStroke | log_s_Brucella_melitensis         | Weighted mode             | 31 | 0.2409  | 0.5476 | 0.6632 | -0.0236 | 0.0487 | 0.6314 | 39.6928 | 0.0891 | 2.8134 |
| IschemicStroke | log_s_Burkholderia_multivorans    | MR Egger                  | 31 | 0.3585  | 0.5795 | 0.5409 | -0.0323 | 0.0415 | 0.4425 | 24.9064 | 0.6831 | 1.1315 |
| IschemicStroke | log_s_Burkholderia_multivorans    | Weighted median           | 31 | -0.1522 | 0.2989 | 0.6105 | -0.0323 | 0.0415 | 0.4425 | 24.9064 | 0.6831 | 1.1315 |
| IschemicStroke | log_s_Burkholderia_multivorans    | Inverse variance weighted | 31 | -0.0604 | 0.2153 | 0.7791 | -0.0323 | 0.0415 | 0.4425 | 24.9064 | 0.6831 | 1.1315 |
| IschemicStroke | log_s_Burkholderia_multivorans    | Simple mode               | 31 | -0.1718 | 0.5693 | 0.7649 | -0.0323 | 0.0415 | 0.4425 | 24.9064 | 0.6831 | 1.1315 |
| IschemicStroke | log_s_Burkholderia_multivorans    | Weighted mode             | 31 | -0.0970 | 0.4880 | 0.8437 | -0.0323 | 0.0415 | 0.4425 | 24.9064 | 0.6831 | 1.1315 |
| IschemicStroke | log_s_Campylobacter_conciscus     | MR Egger                  | 31 | -1.4263 | 0.6072 | 0.0259 | 0.0950  | 0.0434 | 0.0370 | 36.3456 | 0.1970 | 3.2880 |
| IschemicStroke | log_s_Campylobacter_conciscus     | Weighted median           | 31 | -0.3332 | 0.3319 | 0.3154 | 0.0950  | 0.0434 | 0.0370 | 36.3456 | 0.1970 | 3.2880 |
| IschemicStroke | log_s_Campylobacter_conciscus     | Inverse variance weighted | 31 | -0.1927 | 0.2384 | 0.4190 | 0.0950  | 0.0434 | 0.0370 | 36.3456 | 0.1970 | 3.2880 |
| IschemicStroke | log_s_Campylobacter_conciscus     | Simple mode               | 31 | -0.2140 | 0.5907 | 0.7197 | 0.0950  | 0.0434 | 0.0370 | 36.3456 | 0.1970 | 3.2880 |
| IschemicStroke | log_s_Campylobacter_conciscus     | Weighted mode             | 31 | -0.4617 | 0.4993 | 0.3624 | 0.0950  | 0.0434 | 0.0370 | 36.3456 | 0.1970 | 3.2880 |
| IschemicStroke | log_s_Citrobacter_rodentium       | MR Egger                  | 31 | 0.0824  | 0.5801 | 0.8881 | 0.0127  | 0.0415 | 0.7623 | 24.9686 | 0.6799 | 1.0942 |
| IschemicStroke | log_s_Citrobacter_rodentium       | Weighted median           | 31 | 0.3608  | 0.3095 | 0.2437 | 0.0127  | 0.0415 | 0.7623 | 24.9686 | 0.6799 | 1.0942 |
| IschemicStroke | log_s_Citrobacter_rodentium       | Inverse variance weighted | 31 | 0.2468  | 0.2155 | 0.2520 | 0.0127  | 0.0415 | 0.7623 | 24.9686 | 0.6799 | 1.0942 |
| IschemicStroke | log_s_Citrobacter_rodentium       | Simple mode               | 31 | 0.2567  | 0.5875 | 0.6653 | 0.0127  | 0.0415 | 0.7623 | 24.9686 | 0.6799 | 1.0942 |
| IschemicStroke | log_s_Citrobacter_rodentium       | Weighted mode             | 31 | 0.3819  | 0.4805 | 0.4330 | 0.0127  | 0.0415 | 0.7623 | 24.9686 | 0.6799 | 1.0942 |
| IschemicStroke | log_s_Clostridium_butyrlicum      | MR Egger                  | 31 | -0.6332 | 0.5804 | 0.2843 | 0.0381  | 0.0415 | 0.3665 | 27.2411 | 0.5587 | 2.5032 |
| IschemicStroke | log_s_Clostridium_butyrlicum      | Weighted median           | 31 | -0.2769 | 0.3209 | 0.3882 | 0.0381  | 0.0415 | 0.3665 | 27.2411 | 0.5587 | 2.5032 |
| IschemicStroke | log_s_Clostridium_butyrlicum      | Inverse variance weighted | 31 | -0.1387 | 0.2153 | 0.5194 | 0.0381  | 0.0415 | 0.3665 | 27.2411 | 0.5587 | 2.5032 |
| IschemicStroke | log_s_Clostridium_butyrlicum      | Simple mode               | 31 | -0.3515 | 0.5721 | 0.5436 | 0.0381  | 0.0415 | 0.3665 | 27.2411 | 0.5587 | 2.5032 |
| IschemicStroke | log_s_Clostridium_butyrlicum      | Weighted mode             | 31 | -0.3856 | 0.4848 | 0.4327 | 0.0381  | 0.0415 | 0.3665 | 27.2411 | 0.5587 | 2.5032 |
| IschemicStroke | log_s_Clostridium_hiranonis       | MR Egger                  | 31 | -0.4085 | 0.5827 | 0.4889 | 0.0345  | 0.0417 | 0.4146 | 10.9936 | 0.9994 | NA     |
| IschemicStroke | log_s_Clostridium_hiranonis       | Weighted median           | 31 | -0.1295 | 0.2996 | 0.6655 | 0.0345  | 0.0417 | 0.4146 | 10.9936 | 0.9994 | NA     |
| IschemicStroke | log_s_Clostridium_hiranonis       | Inverse variance weighted | 31 | 0.0393  | 0.2166 | 0.8560 | 0.0345  | 0.0417 | 0.4146 | 10.9936 | 0.9994 | NA     |
| IschemicStroke | log_s_Clostridium_hiranonis       | Simple mode               | 31 | -0.2485 | 0.4931 | 0.6180 | 0.0345  | 0.0417 | 0.4146 | 10.9936 | 0.9994 | NA     |
| IschemicStroke | log_s_Clostridium_hiranonis       | Weighted mode             | 31 | -0.2378 | 0.4597 | 0.6088 | 0.0345  | 0.0417 | 0.4146 | 10.9936 | 0.9994 | NA     |
| IschemicStroke | log_s_Clostridium_hylemonae       | MR Egger                  | 31 | 0.5806  | 0.7660 | 0.4546 | -0.0546 | 0.0549 | 0.3274 | 51.6262 | 0.0084 | 4.2168 |
| IschemicStroke | log_s_Clostridium_hylemonae       | Weighted median           | 31 | 0.1610  | 0.3449 | 0.6407 | -0.0546 | 0.0549 | 0.3274 | 51.6262 | 0.0084 | 4.2168 |
| IschemicStroke | log_s_Clostridium_hylemonae       | Inverse variance weighted | 31 | -0.1278 | 0.2847 | 0.6537 | -0.0546 | 0.0549 | 0.3274 | 51.6262 | 0.0084 | 4.2168 |
| IschemicStroke | log_s_Clostridium_hylemonae       | Simple mode               | 31 | 0.0184  | 0.7636 | 0.9809 | -0.0546 | 0.0549 | 0.3274 | 51.6262 | 0.0084 | 4.2168 |
| IschemicStroke | log_s_Clostridium_hylemonae       | Weighted mode             | 31 | 0.1689  | 0.4986 | 0.7371 | -0.0546 | 0.0549 | 0.3274 | 51.6262 | 0.0084 | 4.2168 |
| IschemicStroke | log_s_Clostridium_kluyveri        | MR Egger                  | 31 | 0.2459  | 0.5792 | 0.6744 | -0.0085 | 0.0415 | 0.8383 | 23.3547 | 0.7601 | 1.7589 |
| IschemicStroke | log_s_Clostridium_kluyveri        | Weighted median           | 31 | 0.1277  | 0.3206 | 0.6905 | -0.0085 | 0.0415 | 0.8383 | 23.3547 | 0.7601 | 1.7589 |
| IschemicStroke | log_s_Clostridium_kluyveri        | Inverse variance weighted | 31 | 0.1351  | 0.2150 | 0.5299 | -0.0085 | 0.0415 | 0.8383 | 23.3547 | 0.7601 | 1.7589 |
| IschemicStroke | log_s_Clostridium_kluyveri        | Simple mode               | 31 | 0.2385  | 0.6079 | 0.6976 | -0.0085 | 0.0415 | 0.8383 | 23.3547 | 0.7601 | 1.7589 |
| IschemicStroke | log_s_Clostridium_kluyveri        | Weighted mode             | 31 | 0.2533  | 0.5033 | 0.6184 | -0.0085 | 0.0415 | 0.8383 | 23.3547 | 0.7601 | 1.7589 |
| IschemicStroke | log_s_Clostridium_phytofermentans | MR Egger                  | 31 | 0.9853  | 0.7102 | 0.1759 | -0.0495 | 0.0508 | 0.3375 | 44.0000 | 0.0477 | 6.5341 |
| IschemicStroke | log_s_Clostridium_phytofermentans | Weighted median           | 31 | 0.3031  | 0.3343 | 0.3646 | -0.0495 | 0.0508 | 0.3375 | 44.0000 | 0.0477 | 6.5341 |
| IschemicStroke | log_s_Clostridium_phytofermentans | Inverse variance weighted | 31 | 0.3420  | 0.2630 | 0.1935 | -0.0495 | 0.0508 | 0.3375 | 44.0000 | 0.0477 | 6.5341 |
| IschemicStroke | log_s_Clostridium_phytofermentans | Simple mode               | 31 | 0.1333  | 0.6801 | 0.8459 | -0.0495 | 0.0508 | 0.3375 | 44.0000 | 0.0477 | 6.5341 |

|                |                                        |                           |    |         |        |        |         |        |        |         |        |            |
|----------------|----------------------------------------|---------------------------|----|---------|--------|--------|---------|--------|--------|---------|--------|------------|
| IschemicStroke | log_s_Clostridium_phytofermentans      | Weighted mode             | 31 | 0.0580  | 0.7670 | 0.9403 | -0.0495 | 0.0508 | 0.3375 | 44.0000 | 0.0477 | 6.5341     |
| IschemicStroke | log_s_Collinsella_stercoris            | MR Egger                  | 31 | 1.4875  | 0.6705 | 0.0345 | -0.1001 | 0.0477 | 0.0448 | 41.8357 | 0.0739 | 322.5403   |
| IschemicStroke | log_s_Collinsella_stercoris            | Weighted median           | 31 | 0.2591  | 0.3455 | 0.4533 | -0.1001 | 0.0477 | 0.0448 | 41.8357 | 0.0739 | 322.5403   |
| IschemicStroke | log_s_Collinsella_stercoris            | Inverse variance weighted | 31 | 0.1773  | 0.2574 | 0.4911 | -0.1001 | 0.0477 | 0.0448 | 41.8357 | 0.0739 | 322.5403   |
| IschemicStroke | log_s_Collinsella_stercoris            | Simple mode               | 31 | 0.0161  | 0.6838 | 0.9814 | -0.1001 | 0.0477 | 0.0448 | 41.8357 | 0.0739 | 322.5403   |
| IschemicStroke | log_s_Collinsella_stercoris            | Weighted mode             | 31 | 0.1687  | 0.5285 | 0.7518 | -0.1001 | 0.0477 | 0.0448 | 41.8357 | 0.0739 | 322.5403   |
| IschemicStroke | log_s_Comamonas_testosteroni           | MR Egger                  | 31 | 0.2391  | 0.5802 | 0.6833 | -0.0024 | 0.0415 | 0.9537 | 24.1909 | 0.7195 | 2.4508     |
| IschemicStroke | log_s_Comamonas_testosteroni           | Weighted median           | 31 | 0.2786  | 0.3229 | 0.3882 | -0.0024 | 0.0415 | 0.9537 | 24.1909 | 0.7195 | 2.4508     |
| IschemicStroke | log_s_Comamonas_testosteroni           | Inverse variance weighted | 31 | 0.2075  | 0.2155 | 0.3356 | -0.0024 | 0.0415 | 0.9537 | 24.1909 | 0.7195 | 2.4508     |
| IschemicStroke | log_s_Comamonas_testosteroni           | Simple mode               | 31 | 0.5118  | 0.5625 | 0.3701 | -0.0024 | 0.0415 | 0.9537 | 24.1909 | 0.7195 | 2.4508     |
| IschemicStroke | log_s_Comamonas_testosteroni           | Weighted mode             | 31 | 0.3820  | 0.4635 | 0.4163 | -0.0024 | 0.0415 | 0.9537 | 24.1909 | 0.7195 | 2.4508     |
| IschemicStroke | log_s_Corynebacterium_glucuronolyticum | MR Egger                  | 31 | -1.2330 | 0.6021 | 0.0497 | 0.0887  | 0.0429 | 0.0479 | 34.1546 | 0.2747 | 29.1478    |
| IschemicStroke | log_s_Corynebacterium_glucuronolyticum | Weighted median           | 31 | 0.2594  | 0.3295 | 0.4311 | 0.0887  | 0.0429 | 0.0479 | 34.1546 | 0.2747 | 29.1478    |
| IschemicStroke | log_s_Corynebacterium_glucuronolyticum | Inverse variance weighted | 31 | -0.0760 | 0.2325 | 0.7438 | 0.0887  | 0.0429 | 0.0479 | 34.1546 | 0.2747 | 29.1478    |
| IschemicStroke | log_s_Corynebacterium_glucuronolyticum | Simple mode               | 31 | 0.2989  | 0.6145 | 0.6302 | 0.0887  | 0.0429 | 0.0479 | 34.1546 | 0.2747 | 29.1478    |
| IschemicStroke | log_s_Corynebacterium_glucuronolyticum | Weighted mode             | 31 | 0.2989  | 0.4935 | 0.5493 | 0.0887  | 0.0429 | 0.0479 | 34.1546 | 0.2747 | 29.1478    |
| IschemicStroke | log_s_Desulfovibrio_alaskensis         | MR Egger                  | 31 | 0.3499  | 0.5798 | 0.5509 | -0.0310 | 0.0415 | 0.4618 | 20.9570 | 0.8607 | 4.7592     |
| IschemicStroke | log_s_Desulfovibrio_alaskensis         | Weighted median           | 31 | -0.0119 | 0.3070 | 0.9692 | -0.0310 | 0.0415 | 0.4618 | 20.9570 | 0.8607 | 4.7592     |
| IschemicStroke | log_s_Desulfovibrio_alaskensis         | Inverse variance weighted | 31 | -0.0515 | 0.2154 | 0.8110 | -0.0310 | 0.0415 | 0.4618 | 20.9570 | 0.8607 | 4.7592     |
| IschemicStroke | log_s_Desulfovibrio_alaskensis         | Simple mode               | 31 | -0.1445 | 0.5809 | 0.8052 | -0.0310 | 0.0415 | 0.4618 | 20.9570 | 0.8607 | 4.7592     |
| IschemicStroke | log_s_Desulfovibrio_alaskensis         | Weighted mode             | 31 | 0.0147  | 0.4524 | 0.9743 | -0.0310 | 0.0415 | 0.4618 | 20.9570 | 0.8607 | 4.7592     |
| IschemicStroke | log_s_Enterobacter_asburiae            | MR Egger                  | 31 | 0.2840  | 0.6188 | 0.6497 | -0.0459 | 0.0443 | 0.3082 | 34.1468 | 0.2750 | 7.2015     |
| IschemicStroke | log_s_Enterobacter_asburiae            | Weighted median           | 31 | -0.1563 | 0.3273 | 0.6330 | -0.0459 | 0.0443 | 0.3082 | 34.1468 | 0.2750 | 7.2015     |
| IschemicStroke | log_s_Enterobacter_asburiae            | Inverse variance weighted | 31 | -0.3120 | 0.2300 | 0.1748 | -0.0459 | 0.0443 | 0.3082 | 34.1468 | 0.2750 | 7.2015     |
| IschemicStroke | log_s_Enterobacter_asburiae            | Simple mode               | 31 | -0.4189 | 0.6779 | 0.5413 | -0.0459 | 0.0443 | 0.3082 | 34.1468 | 0.2750 | 7.2015     |
| IschemicStroke | log_s_Enterobacter_asburiae            | Weighted mode             | 31 | 0.3165  | 0.4373 | 0.4748 | -0.0459 | 0.0443 | 0.3082 | 34.1468 | 0.2750 | 7.2015     |
| IschemicStroke | log_s_Enterobacter_cancerogenus        | MR Egger                  | 31 | 0.1267  | 0.5799 | 0.8286 | -0.0247 | 0.0415 | 0.5568 | 26.7586 | 0.5847 | 1.6152     |
| IschemicStroke | log_s_Enterobacter_cancerogenus        | Weighted median           | 31 | 0.0154  | 0.3127 | 0.9607 | -0.0247 | 0.0415 | 0.5568 | 26.7586 | 0.5847 | 1.6152     |
| IschemicStroke | log_s_Enterobacter_cancerogenus        | Inverse variance weighted | 31 | -0.1933 | 0.2155 | 0.3696 | -0.0247 | 0.0415 | 0.5568 | 26.7586 | 0.5847 | 1.6152     |
| IschemicStroke | log_s_Enterobacter_cancerogenus        | Simple mode               | 31 | -0.5113 | 0.5756 | 0.3814 | -0.0247 | 0.0415 | 0.5568 | 26.7586 | 0.5847 | 1.6152     |
| IschemicStroke | log_s_Enterobacter_cancerogenus        | Weighted mode             | 31 | -0.0078 | 0.4340 | 0.9858 | -0.0247 | 0.0415 | 0.5568 | 26.7586 | 0.5847 | 1.6152     |
| IschemicStroke | log_s_Escherichia_albertii             | MR Egger                  | 31 | 0.2932  | 0.6471 | 0.6539 | -0.0158 | 0.0463 | 0.7362 | 36.1536 | 0.1691 | 1.1165     |
| IschemicStroke | log_s_Escherichia_albertii             | Weighted median           | 31 | 0.2341  | 0.3468 | 0.4996 | -0.0158 | 0.0463 | 0.7362 | 36.1536 | 0.1691 | 1.1165     |
| IschemicStroke | log_s_Escherichia_albertii             | Inverse variance weighted | 31 | 0.0888  | 0.2369 | 0.7078 | -0.0158 | 0.0463 | 0.7362 | 36.1536 | 0.1691 | 1.1165     |
| IschemicStroke | log_s_Escherichia_albertii             | Simple mode               | 31 | 0.0204  | 0.6122 | 0.9737 | -0.0158 | 0.0463 | 0.7362 | 36.1536 | 0.1691 | 1.1165     |
| IschemicStroke | log_s_Escherichia_albertii             | Weighted mode             | 31 | 0.1833  | 0.4590 | 0.6925 | -0.0158 | 0.0463 | 0.7362 | 36.1536 | 0.1691 | 1.1165     |
| IschemicStroke | log_s_Eubacterium_cellulosolvens       | MR Egger                  | 31 | 0.5011  | 0.5815 | 0.3960 | -0.0216 | 0.0416 | 0.6073 | 27.0079 | 0.5713 | 53.6713    |
| IschemicStroke | log_s_Eubacterium_cellulosolvens       | Weighted median           | 31 | -0.0612 | 0.3138 | 0.8455 | -0.0216 | 0.0416 | 0.6073 | 27.0079 | 0.5713 | 53.6713    |
| IschemicStroke | log_s_Eubacterium_cellulosolvens       | Inverse variance weighted | 31 | 0.2205  | 0.2157 | 0.3066 | -0.0216 | 0.0416 | 0.6073 | 27.0079 | 0.5713 | 53.6713    |
| IschemicStroke | log_s_Eubacterium_cellulosolvens       | Simple mode               | 31 | 0.0427  | 0.5857 | 0.9423 | -0.0216 | 0.0416 | 0.6073 | 27.0079 | 0.5713 | 53.6713    |
| IschemicStroke | log_s_Eubacterium_cellulosolvens       | Weighted mode             | 31 | -0.0275 | 0.4101 | 0.9469 | -0.0216 | 0.0416 | 0.6073 | 27.0079 | 0.5713 | 53.6713    |
| IschemicStroke | log_s_Filifactor_alocis                | MR Egger                  | 31 | 0.9040  | 0.7405 | 0.2320 | -0.0630 | 0.0529 | 0.2440 | 49.2364 | 0.0149 | -1138.7806 |
| IschemicStroke | log_s_Filifactor_alocis                | Weighted median           | 31 | 0.1120  | 0.3362 | 0.7390 | -0.0630 | 0.0529 | 0.2440 | 49.2364 | 0.0149 | -1138.7806 |
| IschemicStroke | log_s_Filifactor_alocis                | Inverse variance weighted | 31 | 0.0858  | 0.2759 | 0.7558 | -0.0630 | 0.0529 | 0.2440 | 49.2364 | 0.0149 | -1138.7806 |
| IschemicStroke | log_s_Filifactor_alocis                | Simple mode               | 31 | 0.0718  | 0.5559 | 0.8981 | -0.0630 | 0.0529 | 0.2440 | 49.2364 | 0.0149 | -1138.7806 |
| IschemicStroke | log_s_Filifactor_alocis                | Weighted mode             | 31 | 0.1225  | 0.4406 | 0.7829 | -0.0630 | 0.0529 | 0.2440 | 49.2364 | 0.0149 | -1138.7806 |
| IschemicStroke | log_s_Fusobacterium_gonidiaformans     | MR Egger                  | 31 | -0.1489 | 0.5794 | 0.7990 | 0.0112  | 0.0415 | 0.7895 | 24.6892 | 0.6943 | 1.2447     |
| IschemicStroke | log_s_Fusobacterium_gonidiaformans     | Weighted median           | 31 | -0.0976 | 0.3076 | 0.7510 | 0.0112  | 0.0415 | 0.7895 | 24.6892 | 0.6943 | 1.2447     |
| IschemicStroke | log_s_Fusobacterium_gonidiaformans     | Inverse variance weighted | 31 | -0.0040 | 0.2154 | 0.9853 | 0.0112  | 0.0415 | 0.7895 | 24.6892 | 0.6943 | 1.2447     |
| IschemicStroke | log_s_Fusobacterium_gonidiaformans     | Simple mode               | 31 | 0.0152  | 0.5428 | 0.9779 | 0.0112  | 0.0415 | 0.7895 | 24.6892 | 0.6943 | 1.2447     |
| IschemicStroke | log_s_Fusobacterium_gonidiaformans     | Weighted mode             | 31 | -0.0899 | 0.4347 | 0.8376 | 0.0112  | 0.0415 | 0.7895 | 24.6892 | 0.6943 | 1.2447     |
| IschemicStroke | log_s_Fusobacterium_nucleatum          | MR Egger                  | 31 | 0.0906  | 0.5846 | 0.8780 | -0.0015 | 0.0419 | 0.9716 | 25.6236 | 0.6455 | 1.3655     |
| IschemicStroke | log_s_Fusobacterium_nucleatum          | Weighted median           | 31 | 0.1843  | 0.3192 | 0.5638 | -0.0015 | 0.0419 | 0.9716 | 25.6236 | 0.6455 | 1.3655     |
| IschemicStroke | log_s_Fusobacterium_nucleatum          | Inverse variance weighted | 31 | 0.0710  | 0.2172 | 0.7436 | -0.0015 | 0.0419 | 0.9716 | 25.6236 | 0.6455 | 1.3655     |
| IschemicStroke | log_s_Fusobacterium_nucleatum          | Simple mode               | 31 | 0.0293  | 0.5807 | 0.9600 | -0.0015 | 0.0419 | 0.9716 | 25.6236 | 0.6455 | 1.3655     |
| IschemicStroke | log_s_Fusobacterium_nucleatum          | Weighted mode             | 31 | 0.2880  | 0.4890 | 0.5603 | -0.0015 | 0.0419 | 0.9716 | 25.6236 | 0.6455 | 1.3655     |
| IschemicStroke | log_s_Fusobacterium_periodonticum      | MR Egger                  | 31 | -0.5898 | 0.5829 | 0.3199 | 0.0327  | 0.0417 | 0.4399 | 25.1644 | 0.6697 | 1.2539     |
| IschemicStroke | log_s_Fusobacterium_periodonticum      | Weighted median           | 31 | -0.1385 | 0.3156 | 0.6608 | 0.0327  | 0.0417 | 0.4399 | 25.1644 | 0.6697 | 1.2539     |
| IschemicStroke | log_s_Fusobacterium_periodonticum      | Inverse variance weighted | 31 | -0.1660 | 0.2165 | 0.4432 | 0.0327  | 0.0417 | 0.4399 | 25.1644 | 0.6697 | 1.2539     |
| IschemicStroke | log_s_Fusobacterium_periodonticum      | Simple mode               | 31 | -0.1520 | 0.5603 | 0.7880 | 0.0327  | 0.0417 | 0.4399 | 25.1644 | 0.6697 | 1.2539     |
| IschemicStroke | log_s_Fusobacterium_periodonticum      | Weighted mode             | 31 | -0.2215 | 0.4814 | 0.6488 | 0.0327  | 0.0417 | 0.4399 | 25.1644 | 0.6697 | 1.2539     |

|                |                                 |                           |    |         |        |        |         |        |        |         |        |          |
|----------------|---------------------------------|---------------------------|----|---------|--------|--------|---------|--------|--------|---------|--------|----------|
| IschemicStroke | log_s_Fusobacterium_ulcerans    | MR Egger                  | 31 | -0.1007 | 0.6989 | 0.8864 | 0.0198  | 0.0500 | 0.6949 | 40.6349 | 0.0741 | 3.0183   |
| IschemicStroke | log_s_Fusobacterium_ulcerans    | Weighted median           | 31 | 0.3259  | 0.3356 | 0.3315 | 0.0198  | 0.0500 | 0.6949 | 40.6349 | 0.0741 | 3.0183   |
| IschemicStroke | log_s_Fusobacterium_ulcerans    | Inverse variance weighted | 31 | 0.1564  | 0.2555 | 0.5404 | 0.0198  | 0.0500 | 0.6949 | 40.6349 | 0.0741 | 3.0183   |
| IschemicStroke | log_s_Fusobacterium_ulcerans    | Simple mode               | 31 | 0.3097  | 0.6344 | 0.6290 | 0.0198  | 0.0500 | 0.6949 | 40.6349 | 0.0741 | 3.0183   |
| IschemicStroke | log_s_Fusobacterium_ulcerans    | Weighted mode             | 31 | 0.0231  | 0.4628 | 0.9605 | 0.0198  | 0.0500 | 0.6949 | 40.6349 | 0.0741 | 3.0183   |
| IschemicStroke | log_s_Fusobacterium_varium      | MR Egger                  | 31 | 0.1040  | 0.6958 | 0.8822 | -0.0190 | 0.0497 | 0.7048 | 39.8258 | 0.0868 | 6.3293   |
| IschemicStroke | log_s_Fusobacterium_varium      | Weighted median           | 31 | -0.2239 | 0.3407 | 0.5111 | -0.0190 | 0.0497 | 0.7048 | 39.8258 | 0.0868 | 6.3293   |
| IschemicStroke | log_s_Fusobacterium_varium      | Inverse variance weighted | 31 | -0.1435 | 0.2526 | 0.5699 | -0.0190 | 0.0497 | 0.7048 | 39.8258 | 0.0868 | 6.3293   |
| IschemicStroke | log_s_Fusobacterium_varium      | Simple mode               | 31 | -0.2577 | 0.7827 | 0.7443 | -0.0190 | 0.0497 | 0.7048 | 39.8258 | 0.0868 | 6.3293   |
| IschemicStroke | log_s_Fusobacterium_varium      | Weighted mode             | 31 | -0.6637 | 0.6124 | 0.2871 | -0.0190 | 0.0497 | 0.7048 | 39.8258 | 0.0868 | 6.3293   |
| IschemicStroke | log_s_Gemella_haemolysans       | MR Egger                  | 31 | 1.0830  | 0.6170 | 0.0898 | -0.0592 | 0.0442 | 0.1907 | 34.7268 | 0.2527 | 1.3835   |
| IschemicStroke | log_s_Gemella_haemolysans       | Weighted median           | 31 | 0.3898  | 0.3359 | 0.2458 | -0.0592 | 0.0442 | 0.1907 | 34.7268 | 0.2527 | 1.3835   |
| IschemicStroke | log_s_Gemella_haemolysans       | Inverse variance weighted | 31 | 0.3155  | 0.2320 | 0.1739 | -0.0592 | 0.0442 | 0.1907 | 34.7268 | 0.2527 | 1.3835   |
| IschemicStroke | log_s_Gemella_haemolysans       | Simple mode               | 31 | 0.0871  | 0.6353 | 0.8919 | -0.0592 | 0.0442 | 0.1907 | 34.7268 | 0.2527 | 1.3835   |
| IschemicStroke | log_s_Gemella_haemolysans       | Weighted mode             | 31 | 0.9354  | 0.4972 | 0.0697 | -0.0592 | 0.0442 | 0.1907 | 34.7268 | 0.2527 | 1.3835   |
| IschemicStroke | log_s_Lactobacillus_amylovorus  | MR Egger                  | 31 | 0.1164  | 0.6371 | 0.8564 | 0.0004  | 0.0456 | 0.9930 | 33.9882 | 0.2397 | 13.0017  |
| IschemicStroke | log_s_Lactobacillus_amylovorus  | Weighted median           | 31 | 0.1257  | 0.3466 | 0.7169 | 0.0004  | 0.0456 | 0.9930 | 33.9882 | 0.2397 | 13.0017  |
| IschemicStroke | log_s_Lactobacillus_amylovorus  | Inverse variance weighted | 31 | 0.1216  | 0.2325 | 0.6010 | 0.0004  | 0.0456 | 0.9930 | 33.9882 | 0.2397 | 13.0017  |
| IschemicStroke | log_s_Lactobacillus_amylovorus  | Simple mode               | 31 | 0.5004  | 0.5836 | 0.3980 | 0.0004  | 0.0456 | 0.9930 | 33.9882 | 0.2397 | 13.0017  |
| IschemicStroke | log_s_Lactobacillus_amylovorus  | Weighted mode             | 31 | 0.3140  | 0.4755 | 0.5141 | 0.0004  | 0.0456 | 0.9930 | 33.9882 | 0.2397 | 13.0017  |
| IschemicStroke | log_s_Lactobacillus_casei       | MR Egger                  | 31 | -0.1639 | 0.5874 | 0.7823 | -0.0382 | 0.0421 | 0.3716 | 24.2296 | 0.7175 | 1.3612   |
| IschemicStroke | log_s_Lactobacillus_casei       | Weighted median           | 31 | -0.7105 | 0.3116 | 0.0226 | -0.0382 | 0.0421 | 0.3716 | 24.2296 | 0.7175 | 1.3612   |
| IschemicStroke | log_s_Lactobacillus_casei       | Inverse variance weighted | 31 | -0.6588 | 0.2183 | 0.0025 | -0.0382 | 0.0421 | 0.3716 | 24.2296 | 0.7175 | 1.3612   |
| IschemicStroke | log_s_Lactobacillus_casei       | Simple mode               | 31 | -0.7121 | 0.6444 | 0.2779 | -0.0382 | 0.0421 | 0.3716 | 24.2296 | 0.7175 | 1.3612   |
| IschemicStroke | log_s_Lactobacillus_casei       | Weighted mode             | 31 | -0.7942 | 0.5379 | 0.1502 | -0.0382 | 0.0421 | 0.3716 | 24.2296 | 0.7175 | 1.3612   |
| IschemicStroke | log_s_Lactobacillus_crispatus   | MR Egger                  | 31 | -0.6195 | 0.6827 | 0.3717 | 0.0445  | 0.0488 | 0.3693 | 37.7201 | 0.1287 | 231.3036 |
| IschemicStroke | log_s_Lactobacillus_crispatus   | Weighted median           | 31 | 0.0164  | 0.3270 | 0.9601 | 0.0445  | 0.0488 | 0.3693 | 37.7201 | 0.1287 | 231.3036 |
| IschemicStroke | log_s_Lactobacillus_crispatus   | Inverse variance weighted | 31 | -0.0412 | 0.2522 | 0.8701 | 0.0445  | 0.0488 | 0.3693 | 37.7201 | 0.1287 | 231.3036 |
| IschemicStroke | log_s_Lactobacillus_crispatus   | Simple mode               | 31 | -0.1392 | 0.6727 | 0.8375 | 0.0445  | 0.0488 | 0.3693 | 37.7201 | 0.1287 | 231.3036 |
| IschemicStroke | log_s_Lactobacillus_crispatus   | Weighted mode             | 31 | -0.2019 | 0.4935 | 0.6854 | 0.0445  | 0.0488 | 0.3693 | 37.7201 | 0.1287 | 231.3036 |
| IschemicStroke | log_s_Lactobacillus_delbrueckii | MR Egger                  | 31 | 0.0316  | 0.5854 | 0.9573 | 0.0084  | 0.0418 | 0.8432 | 28.5966 | 0.4862 | 5.1970   |
| IschemicStroke | log_s_Lactobacillus_delbrueckii | Weighted median           | 31 | -0.0296 | 0.3183 | 0.9260 | 0.0084  | 0.0418 | 0.8432 | 28.5966 | 0.4862 | 5.1970   |
| IschemicStroke | log_s_Lactobacillus_delbrueckii | Inverse variance weighted | 31 | 0.1402  | 0.2162 | 0.5168 | 0.0084  | 0.0418 | 0.8432 | 28.5966 | 0.4862 | 5.1970   |
| IschemicStroke | log_s_Lactobacillus_delbrueckii | Simple mode               | 31 | -0.0642 | 0.6675 | 0.9240 | 0.0084  | 0.0418 | 0.8432 | 28.5966 | 0.4862 | 5.1970   |
| IschemicStroke | log_s_Lactobacillus_delbrueckii | Weighted mode             | 31 | -0.2423 | 0.5770 | 0.6776 | 0.0084  | 0.0418 | 0.8432 | 28.5966 | 0.4862 | 5.1970   |
| IschemicStroke | log_s_Lactobacillus_fermentum   | MR Egger                  | 31 | -0.3609 | 0.5912 | 0.5463 | 0.0043  | 0.0423 | 0.9197 | 29.7012 | 0.4290 | 2.4399   |
| IschemicStroke | log_s_Lactobacillus_fermentum   | Weighted median           | 31 | -0.5900 | 0.3317 | 0.0752 | 0.0043  | 0.0423 | 0.9197 | 29.7012 | 0.4290 | 2.4399   |
| IschemicStroke | log_s_Lactobacillus_fermentum   | Inverse variance weighted | 31 | -0.3051 | 0.2170 | 0.1597 | 0.0043  | 0.0423 | 0.9197 | 29.7012 | 0.4290 | 2.4399   |
| IschemicStroke | log_s_Lactobacillus_fermentum   | Simple mode               | 31 | -0.9455 | 0.6401 | 0.1501 | 0.0043  | 0.0423 | 0.9197 | 29.7012 | 0.4290 | 2.4399   |
| IschemicStroke | log_s_Lactobacillus_fermentum   | Weighted mode             | 31 | -0.6586 | 0.5022 | 0.1996 | 0.0043  | 0.0423 | 0.9197 | 29.7012 | 0.4290 | 2.4399   |
| IschemicStroke | log_s_Lactobacillus_gasseri     | MR Egger                  | 31 | -0.3398 | 0.5795 | 0.5622 | 0.0247  | 0.0415 | 0.5562 | 27.7614 | 0.5307 | 1.8075   |
| IschemicStroke | log_s_Lactobacillus_gasseri     | Weighted median           | 31 | -0.2635 | 0.3104 | 0.3959 | 0.0247  | 0.0415 | 0.5562 | 27.7614 | 0.5307 | 1.8075   |
| IschemicStroke | log_s_Lactobacillus_gasseri     | Inverse variance weighted | 31 | -0.0194 | 0.2150 | 0.9283 | 0.0247  | 0.0415 | 0.5562 | 27.7614 | 0.5307 | 1.8075   |
| IschemicStroke | log_s_Lactobacillus_gasseri     | Simple mode               | 31 | -0.2154 | 0.5376 | 0.6915 | 0.0247  | 0.0415 | 0.5562 | 27.7614 | 0.5307 | 1.8075   |
| IschemicStroke | log_s_Lactobacillus_gasseri     | Weighted mode             | 31 | -0.3006 | 0.4439 | 0.5034 | 0.0247  | 0.0415 | 0.5562 | 27.7614 | 0.5307 | 1.8075   |
| IschemicStroke | log_s_Lactobacillus_reuteri     | MR Egger                  | 31 | -0.2372 | 0.5804 | 0.6858 | 0.0220  | 0.0415 | 0.6001 | 23.4553 | 0.7553 | 4.2869   |
| IschemicStroke | log_s_Lactobacillus_reuteri     | Weighted median           | 31 | 0.2580  | 0.3158 | 0.4140 | 0.0220  | 0.0415 | 0.6001 | 23.4553 | 0.7553 | 4.2869   |
| IschemicStroke | log_s_Lactobacillus_reuteri     | Inverse variance weighted | 31 | 0.0485  | 0.2155 | 0.8220 | 0.0220  | 0.0415 | 0.6001 | 23.4553 | 0.7553 | 4.2869   |
| IschemicStroke | log_s_Lactobacillus_reuteri     | Simple mode               | 31 | 0.1063  | 0.5274 | 0.8416 | 0.0220  | 0.0415 | 0.6001 | 23.4553 | 0.7553 | 4.2869   |
| IschemicStroke | log_s_Lactobacillus_reuteri     | Weighted mode             | 31 | 0.1638  | 0.4568 | 0.7224 | 0.0220  | 0.0415 | 0.6001 | 23.4553 | 0.7553 | 4.2869   |
| IschemicStroke | log_s_Lactobacillus_vaginalis   | MR Egger                  | 31 | -0.3559 | 0.6760 | 0.6026 | 0.0341  | 0.0484 | 0.4868 | 39.4767 | 0.0929 | 10.1776  |
| IschemicStroke | log_s_Lactobacillus_vaginalis   | Weighted median           | 31 | -0.2080 | 0.3354 | 0.5351 | 0.0341  | 0.0484 | 0.4868 | 39.4767 | 0.0929 | 10.1776  |
| IschemicStroke | log_s_Lactobacillus_vaginalis   | Inverse variance weighted | 31 | 0.0863  | 0.2486 | 0.7284 | 0.0341  | 0.0484 | 0.4868 | 39.4767 | 0.0929 | 10.1776  |
| IschemicStroke | log_s_Lactobacillus_vaginalis   | Simple mode               | 31 | -0.4405 | 0.6080 | 0.4744 | 0.0341  | 0.0484 | 0.4868 | 39.4767 | 0.0929 | 10.1776  |
| IschemicStroke | log_s_Lactobacillus_vaginalis   | Weighted mode             | 31 | -0.3513 | 0.4325 | 0.4230 | 0.0341  | 0.0484 | 0.4868 | 39.4767 | 0.0929 | 10.1776  |
| IschemicStroke | log_s_Lawsonia_intracellularis  | MR Egger                  | 31 | -0.1665 | 0.6018 | 0.7840 | 0.0106  | 0.0431 | 0.8076 | 29.9898 | 0.4145 | 3.8730   |
| IschemicStroke | log_s_Lawsonia_intracellularis  | Weighted median           | 31 | 0.1553  | 0.3193 | 0.6268 | 0.0106  | 0.0431 | 0.8076 | 29.9898 | 0.4145 | 3.8730   |
| IschemicStroke | log_s_Lawsonia_intracellularis  | Inverse variance weighted | 31 | -0.0292 | 0.2203 | 0.8946 | 0.0106  | 0.0431 | 0.8076 | 29.9898 | 0.4145 | 3.8730   |
| IschemicStroke | log_s_Lawsonia_intracellularis  | Simple mode               | 31 | 0.3093  | 0.6008 | 0.6105 | 0.0106  | 0.0431 | 0.8076 | 29.9898 | 0.4145 | 3.8730   |
| IschemicStroke | log_s_Lawsonia_intracellularis  | Weighted mode             | 31 | 0.2123  | 0.4538 | 0.6433 | 0.0106  | 0.0431 | 0.8076 | 29.9898 | 0.4145 | 3.8730   |
| IschemicStroke | log_s_Leuconostoc_mesenteroides | MR Egger                  | 31 | 0.1426  | 0.5850 | 0.8091 | -0.0038 | 0.0419 | 0.9287 | 18.3140 | 0.9376 | 1.3928   |

|                |                                   |                           |    |         |        |        |         |        |        |         |        |        |
|----------------|-----------------------------------|---------------------------|----|---------|--------|--------|---------|--------|--------|---------|--------|--------|
| IschemicStroke | log_s_Leuconostoc_mesenteroides   | Weighted median           | 31 | 0.2518  | 0.3062 | 0.4109 | -0.0038 | 0.0419 | 0.9287 | 18.3140 | 0.9376 | 1.3928 |
| IschemicStroke | log_s_Leuconostoc_mesenteroides   | Inverse variance weighted | 31 | 0.0936  | 0.2173 | 0.6666 | -0.0038 | 0.0419 | 0.9287 | 18.3140 | 0.9376 | 1.3928 |
| IschemicStroke | log_s_Leuconostoc_mesenteroides   | Simple mode               | 31 | 0.4005  | 0.5662 | 0.4848 | -0.0038 | 0.0419 | 0.9287 | 18.3140 | 0.9376 | 1.3928 |
| IschemicStroke | log_s_Leuconostoc_mesenteroides   | Weighted mode             | 31 | 0.4436  | 0.4626 | 0.3453 | -0.0038 | 0.0419 | 0.9287 | 18.3140 | 0.9376 | 1.3928 |
| IschemicStroke | log_s_Methylobacillus_flagellatus | MR Egger                  | 31 | -0.2184 | 0.5883 | 0.7132 | 0.0202  | 0.0421 | 0.6346 | 29.6063 | 0.4338 | 2.4328 |
| IschemicStroke | log_s_Methylobacillus_flagellatus | Weighted median           | 31 | 0.0404  | 0.3175 | 0.8986 | 0.0202  | 0.0421 | 0.6346 | 29.6063 | 0.4338 | 2.4328 |
| IschemicStroke | log_s_Methylobacillus_flagellatus | Inverse variance weighted | 31 | 0.0440  | 0.2162 | 0.8387 | 0.0202  | 0.0421 | 0.6346 | 29.6063 | 0.4338 | 2.4328 |
| IschemicStroke | log_s_Methylobacillus_flagellatus | Simple mode               | 31 | -0.0712 | 0.5929 | 0.9052 | 0.0202  | 0.0421 | 0.6346 | 29.6063 | 0.4338 | 2.4328 |
| IschemicStroke | log_s_Methylobacillus_flagellatus | Weighted mode             | 31 | -0.0011 | 0.4373 | 0.9979 | 0.0202  | 0.0421 | 0.6346 | 29.6063 | 0.4338 | 2.4328 |
| IschemicStroke | log_s_Mobiluncus_mulieris         | MR Egger                  | 31 | 0.5431  | 0.6337 | 0.3984 | -0.0321 | 0.0453 | 0.4842 | 33.0308 | 0.2765 | 2.5021 |
| IschemicStroke | log_s_Mobiluncus_mulieris         | Weighted median           | 31 | -0.0069 | 0.3436 | 0.9840 | -0.0321 | 0.0453 | 0.4842 | 33.0308 | 0.2765 | 2.5021 |
| IschemicStroke | log_s_Mobiluncus_mulieris         | Inverse variance weighted | 31 | 0.1260  | 0.2328 | 0.5883 | -0.0321 | 0.0453 | 0.4842 | 33.0308 | 0.2765 | 2.5021 |
| IschemicStroke | log_s_Mobiluncus_mulieris         | Simple mode               | 31 | -0.3367 | 0.5830 | 0.5679 | -0.0321 | 0.0453 | 0.4842 | 33.0308 | 0.2765 | 2.5021 |
| IschemicStroke | log_s_Mobiluncus_mulieris         | Weighted mode             | 31 | -0.1766 | 0.5149 | 0.7340 | -0.0321 | 0.0453 | 0.4842 | 33.0308 | 0.2765 | 2.5021 |
| IschemicStroke | log_s_Neisseria_flavescens        | MR Egger                  | 31 | -0.7389 | 0.5831 | 0.2151 | 0.0264  | 0.0417 | 0.5318 | 18.2650 | 0.9387 | 1.3058 |
| IschemicStroke | log_s_Neisseria_flavescens        | Weighted median           | 31 | -0.2817 | 0.3020 | 0.3509 | 0.0264  | 0.0417 | 0.5318 | 18.2650 | 0.9387 | 1.3058 |
| IschemicStroke | log_s_Neisseria_flavescens        | Inverse variance weighted | 31 | -0.3963 | 0.2164 | 0.0670 | 0.0264  | 0.0417 | 0.5318 | 18.2650 | 0.9387 | 1.3058 |
| IschemicStroke | log_s_Neisseria_flavescens        | Simple mode               | 31 | -0.1045 | 0.6071 | 0.8645 | 0.0264  | 0.0417 | 0.5318 | 18.2650 | 0.9387 | 1.3058 |
| IschemicStroke | log_s_Neisseria_flavescens        | Weighted mode             | 31 | -0.2697 | 0.4571 | 0.5596 | 0.0264  | 0.0417 | 0.5318 | 18.2650 | 0.9387 | 1.3058 |
| IschemicStroke | log_s_Neisseria_gonorrhoeae       | MR Egger                  | 31 | -0.9629 | 0.6281 | 0.1361 | 0.0551  | 0.0450 | 0.2303 | 35.1735 | 0.2364 | 4.4953 |
| IschemicStroke | log_s_Neisseria_gonorrhoeae       | Weighted median           | 31 | 0.0435  | 0.3241 | 0.8932 | 0.0551  | 0.0450 | 0.2303 | 35.1735 | 0.2364 | 4.4953 |
| IschemicStroke | log_s_Neisseria_gonorrhoeae       | Inverse variance weighted | 31 | -0.2483 | 0.2352 | 0.2911 | 0.0551  | 0.0450 | 0.2303 | 35.1735 | 0.2364 | 4.4953 |
| IschemicStroke | log_s_Neisseria_gonorrhoeae       | Simple mode               | 31 | 0.3639  | 0.6552 | 0.5827 | 0.0551  | 0.0450 | 0.2303 | 35.1735 | 0.2364 | 4.4953 |
| IschemicStroke | log_s_Neisseria_gonorrhoeae       | Weighted mode             | 31 | 0.0860  | 0.4698 | 0.8560 | 0.0551  | 0.0450 | 0.2303 | 35.1735 | 0.2364 | 4.4953 |
| IschemicStroke | log_s_Neisseria_meningitidis      | MR Egger                  | 31 | -1.5943 | 0.6520 | 0.0208 | 0.0916  | 0.0466 | 0.0593 | 40.1265 | 0.1024 | 7.8385 |
| IschemicStroke | log_s_Neisseria_meningitidis      | Weighted median           | 31 | -0.2788 | 0.3483 | 0.4233 | 0.0916  | 0.0466 | 0.0593 | 40.1265 | 0.1024 | 7.8385 |
| IschemicStroke | log_s_Neisseria_meningitidis      | Inverse variance weighted | 31 | -0.4052 | 0.2528 | 0.1090 | 0.0916  | 0.0466 | 0.0593 | 40.1265 | 0.1024 | 7.8385 |
| IschemicStroke | log_s_Neisseria_meningitidis      | Simple mode               | 31 | -0.6035 | 0.6797 | 0.3817 | 0.0916  | 0.0466 | 0.0593 | 40.1265 | 0.1024 | 7.8385 |
| IschemicStroke | log_s_Neisseria_meningitidis      | Weighted mode             | 31 | -0.5192 | 0.4770 | 0.2851 | 0.0916  | 0.0466 | 0.0593 | 40.1265 | 0.1024 | 7.8385 |
| IschemicStroke | log_s_Neisseria_mucosa            | MR Egger                  | 31 | -0.4503 | 0.7420 | 0.5486 | 0.0054  | 0.0531 | 0.9197 | 46.2022 | 0.0224 | 4.2004 |
| IschemicStroke | log_s_Neisseria_mucosa            | Weighted median           | 31 | -0.2918 | 0.3451 | 0.3977 | 0.0054  | 0.0531 | 0.9197 | 46.2022 | 0.0224 | 4.2004 |
| IschemicStroke | log_s_Neisseria_mucosa            | Inverse variance weighted | 31 | -0.3803 | 0.2708 | 0.1602 | 0.0054  | 0.0531 | 0.9197 | 46.2022 | 0.0224 | 4.2004 |
| IschemicStroke | log_s_Neisseria_mucosa            | Simple mode               | 31 | -0.3383 | 0.6897 | 0.6273 | 0.0054  | 0.0531 | 0.9197 | 46.2022 | 0.0224 | 4.2004 |
| IschemicStroke | log_s_Neisseria_mucosa            | Weighted mode             | 31 | -0.2914 | 0.4886 | 0.5554 | 0.0054  | 0.0531 | 0.9197 | 46.2022 | 0.0224 | 4.2004 |
| IschemicStroke | log_s_Neisseria_subflava          | MR Egger                  | 31 | -0.6552 | 0.6063 | 0.2888 | 0.0248  | 0.0434 | 0.5716 | 31.3658 | 0.3484 | 3.9808 |
| IschemicStroke | log_s_Neisseria_subflava          | Weighted median           | 31 | -0.3583 | 0.3101 | 0.2480 | 0.0248  | 0.0434 | 0.5716 | 31.3658 | 0.3484 | 3.9808 |
| IschemicStroke | log_s_Neisseria_subflava          | Inverse variance weighted | 31 | -0.3330 | 0.2224 | 0.1343 | 0.0248  | 0.0434 | 0.5716 | 31.3658 | 0.3484 | 3.9808 |
| IschemicStroke | log_s_Neisseria_subflava          | Simple mode               | 31 | -0.2303 | 0.5958 | 0.7018 | 0.0248  | 0.0434 | 0.5716 | 31.3658 | 0.3484 | 3.9808 |
| IschemicStroke | log_s_Neisseria_subflava          | Weighted mode             | 31 | -0.4929 | 0.4216 | 0.2515 | 0.0248  | 0.0434 | 0.5716 | 31.3658 | 0.3484 | 3.9808 |
| IschemicStroke | log_s_Oscillibacter_valericigenes | MR Egger                  | 31 | 0.0800  | 0.5866 | 0.8925 | 0.0128  | 0.0420 | 0.7629 | 24.5351 | 0.7021 | 1.4110 |
| IschemicStroke | log_s_Oscillibacter_valericigenes | Weighted median           | 31 | 0.2134  | 0.3207 | 0.5059 | 0.0128  | 0.0420 | 0.7629 | 24.5351 | 0.7021 | 1.4110 |
| IschemicStroke | log_s_Oscillibacter_valericigenes | Inverse variance weighted | 31 | 0.2458  | 0.2181 | 0.2598 | 0.0128  | 0.0420 | 0.7629 | 24.5351 | 0.7021 | 1.4110 |
| IschemicStroke | log_s_Oscillibacter_valericigenes | Simple mode               | 31 | 0.3552  | 0.6416 | 0.5840 | 0.0128  | 0.0420 | 0.7629 | 24.5351 | 0.7021 | 1.4110 |
| IschemicStroke | log_s_Oscillibacter_valericigenes | Weighted mode             | 31 | 0.1589  | 0.4733 | 0.7395 | 0.0128  | 0.0420 | 0.7629 | 24.5351 | 0.7021 | 1.4110 |
| IschemicStroke | log_s_Pantoea_ananatis            | MR Egger                  | 31 | 0.4014  | 0.5810 | 0.4951 | -0.0421 | 0.0416 | 0.3196 | 20.6437 | 0.8987 | 1.6679 |
| IschemicStroke | log_s_Pantoea_ananatis            | Weighted median           | 31 | 0.0730  | 0.3083 | 0.8129 | -0.0421 | 0.0416 | 0.3196 | 20.6437 | 0.8987 | 1.6679 |
| IschemicStroke | log_s_Pantoea_ananatis            | Inverse variance weighted | 31 | -0.1450 | 0.2156 | 0.5013 | -0.0421 | 0.0416 | 0.3196 | 20.6437 | 0.8987 | 1.6679 |
| IschemicStroke | log_s_Pantoea_ananatis            | Simple mode               | 31 | 0.2683  | 0.5938 | 0.6546 | -0.0421 | 0.0416 | 0.3196 | 20.6437 | 0.8987 | 1.6679 |
| IschemicStroke | log_s_Pantoea_ananatis            | Weighted mode             | 31 | 0.2289  | 0.4635 | 0.6249 | -0.0421 | 0.0416 | 0.3196 | 20.6437 | 0.8987 | 1.6679 |
| IschemicStroke | log_s_Peptoniphilus_duerdenii     | MR Egger                  | 31 | 1.6913  | 0.5911 | 0.0078 | -0.0964 | 0.0423 | 0.0301 | 25.9216 | 0.6791 | 5.5169 |
| IschemicStroke | log_s_Peptoniphilus_duerdenii     | Weighted median           | 31 | 0.5082  | 0.3312 | 0.1249 | -0.0964 | 0.0423 | 0.0301 | 25.9216 | 0.6791 | 5.5169 |
| IschemicStroke | log_s_Peptoniphilus_duerdenii     | Inverse variance weighted | 31 | 0.4388  | 0.2190 | 0.0451 | -0.0964 | 0.0423 | 0.0301 | 25.9216 | 0.6791 | 5.5169 |
| IschemicStroke | log_s_Peptoniphilus_duerdenii     | Simple mode               | 31 | 0.0559  | 0.7141 | 0.9381 | -0.0964 | 0.0423 | 0.0301 | 25.9216 | 0.6791 | 5.5169 |
| IschemicStroke | log_s_Peptoniphilus_duerdenii     | Weighted mode             | 31 | 1.1743  | 0.5151 | 0.0299 | -0.0964 | 0.0423 | 0.0301 | 25.9216 | 0.6791 | 5.5169 |
| IschemicStroke | log_s_Peptoniphilus_hareii        | MR Egger                  | 31 | 1.5204  | 0.5959 | 0.0163 | -0.0850 | 0.0426 | 0.0554 | 24.4508 | 0.7513 | 3.8757 |
| IschemicStroke | log_s_Peptoniphilus_hareii        | Weighted median           | 31 | 0.6292  | 0.3113 | 0.0432 | -0.0850 | 0.0426 | 0.0554 | 24.4508 | 0.7513 | 3.8757 |
| IschemicStroke | log_s_Peptoniphilus_hareii        | Inverse variance weighted | 31 | 0.4152  | 0.2203 | 0.0595 | -0.0850 | 0.0426 | 0.0554 | 24.4508 | 0.7513 | 3.8757 |
| IschemicStroke | log_s_Peptoniphilus_hareii        | Simple mode               | 31 | 1.1307  | 0.6093 | 0.0733 | -0.0850 | 0.0426 | 0.0554 | 24.4508 | 0.7513 | 3.8757 |
| IschemicStroke | log_s_Peptoniphilus_hareii        | Weighted mode             | 31 | 1.0289  | 0.4688 | 0.0361 | -0.0850 | 0.0426 | 0.0554 | 24.4508 | 0.7513 | 3.8757 |
| IschemicStroke | log_s_Porphyromonas_endodontalis  | MR Egger                  | 31 | -0.9308 | 0.5792 | 0.1189 | 0.0891  | 0.0415 | 0.0401 | 22.1303 | 0.8493 | 1.8772 |
| IschemicStroke | log_s_Porphyromonas_endodontalis  | Weighted median           | 31 | -0.0649 | 0.3044 | 0.8312 | 0.0891  | 0.0415 | 0.0401 | 22.1303 | 0.8493 | 1.8772 |

|                |                                     |                           |    |         |        |        |         |        |        |         |        |           |
|----------------|-------------------------------------|---------------------------|----|---------|--------|--------|---------|--------|--------|---------|--------|-----------|
| IschemicStroke | log_s_Porphyromonas_endodontalis    | Inverse variance weighted | 31 | 0.2250  | 0.2152 | 0.2960 | 0.0891  | 0.0415 | 0.0401 | 22.1303 | 0.8493 | 1.8772    |
| IschemicStroke | log_s_Porphyromonas_endodontalis    | Simple mode               | 31 | 0.4218  | 0.6015 | 0.4885 | 0.0891  | 0.0415 | 0.0401 | 22.1303 | 0.8493 | 1.8772    |
| IschemicStroke | log_s_Porphyromonas_endodontalis    | Weighted mode             | 31 | -0.1207 | 0.4464 | 0.7887 | 0.0891  | 0.0415 | 0.0401 | 22.1303 | 0.8493 | 1.8772    |
| IschemicStroke | log_s_Porphyromonas_gingivalis      | MR Egger                  | 31 | -0.5721 | 0.6322 | 0.3729 | 0.0719  | 0.0452 | 0.1225 | 36.5197 | 0.1916 | 1459.8681 |
| IschemicStroke | log_s_Porphyromonas_gingivalis      | Weighted median           | 31 | 0.1514  | 0.3190 | 0.6349 | 0.0719  | 0.0452 | 0.1225 | 36.5197 | 0.1916 | 1459.8681 |
| IschemicStroke | log_s_Porphyromonas_gingivalis      | Inverse variance weighted | 31 | 0.3621  | 0.2398 | 0.1311 | 0.0719  | 0.0452 | 0.1225 | 36.5197 | 0.1916 | 1459.8681 |
| IschemicStroke | log_s_Porphyromonas_gingivalis      | Simple mode               | 31 | 0.3273  | 0.6403 | 0.6130 | 0.0719  | 0.0452 | 0.1225 | 36.5197 | 0.1916 | 1459.8681 |
| IschemicStroke | log_s_Porphyromonas_gingivalis      | Weighted mode             | 31 | 0.2257  | 0.4900 | 0.6484 | 0.0719  | 0.0452 | 0.1225 | 36.5197 | 0.1916 | 1459.8681 |
| IschemicStroke | log_s_Porphyromonas_uenonis         | MR Egger                  | 31 | 0.9498  | 0.6948 | 0.1821 | -0.0506 | 0.0497 | 0.3169 | 40.5153 | 0.0953 | 211.8376  |
| IschemicStroke | log_s_Porphyromonas_uenonis         | Weighted median           | 31 | 0.7915  | 0.3345 | 0.0180 | -0.0506 | 0.0497 | 0.3169 | 40.5153 | 0.0953 | 211.8376  |
| IschemicStroke | log_s_Porphyromonas_uenonis         | Inverse variance weighted | 31 | 0.2928  | 0.2582 | 0.2568 | -0.0506 | 0.0497 | 0.3169 | 40.5153 | 0.0953 | 211.8376  |
| IschemicStroke | log_s_Porphyromonas_uenonis         | Simple mode               | 31 | 0.8966  | 0.6002 | 0.1456 | -0.0506 | 0.0497 | 0.3169 | 40.5153 | 0.0953 | 211.8376  |
| IschemicStroke | log_s_Porphyromonas_uenonis         | Weighted mode             | 31 | 0.9537  | 0.4470 | 0.0412 | -0.0506 | 0.0497 | 0.3169 | 40.5153 | 0.0953 | 211.8376  |
| IschemicStroke | log_s_Prevotella_amnii              | MR Egger                  | 31 | -0.4710 | 0.5987 | 0.4378 | 0.0311  | 0.0428 | 0.4742 | 30.3503 | 0.3967 | 11.9662   |
| IschemicStroke | log_s_Prevotella_amnii              | Weighted median           | 31 | -0.2116 | 0.3090 | 0.4935 | 0.0311  | 0.0428 | 0.4742 | 30.3503 | 0.3967 | 11.9662   |
| IschemicStroke | log_s_Prevotella_amnii              | Inverse variance weighted | 31 | -0.0680 | 0.2205 | 0.7579 | 0.0311  | 0.0428 | 0.4742 | 30.3503 | 0.3967 | 11.9662   |
| IschemicStroke | log_s_Prevotella_amnii              | Simple mode               | 31 | -0.1638 | 0.5659 | 0.7742 | 0.0311  | 0.0428 | 0.4742 | 30.3503 | 0.3967 | 11.9662   |
| IschemicStroke | log_s_Prevotella_amnii              | Weighted mode             | 31 | -0.3063 | 0.4500 | 0.5013 | 0.0311  | 0.0428 | 0.4742 | 30.3503 | 0.3967 | 11.9662   |
| IschemicStroke | log_s_Prevotella_bryantii           | MR Egger                  | 31 | -0.6888 | 0.5906 | 0.2530 | 0.0491  | 0.0423 | 0.2550 | 31.3998 | 0.3959 | 1.5723    |
| IschemicStroke | log_s_Prevotella_bryantii           | Weighted median           | 31 | -0.3843 | 0.3198 | 0.2294 | 0.0491  | 0.0423 | 0.2550 | 31.3998 | 0.3959 | 1.5723    |
| IschemicStroke | log_s_Prevotella_bryantii           | Inverse variance weighted | 31 | -0.0518 | 0.2202 | 0.8139 | 0.0491  | 0.0423 | 0.2550 | 31.3998 | 0.3959 | 1.5723    |
| IschemicStroke | log_s_Prevotella_bryantii           | Simple mode               | 31 | -0.3894 | 0.5961 | 0.5185 | 0.0491  | 0.0423 | 0.2550 | 31.3998 | 0.3959 | 1.5723    |
| IschemicStroke | log_s_Prevotella_bryantii           | Weighted mode             | 31 | -0.4673 | 0.4426 | 0.2995 | 0.0491  | 0.0423 | 0.2550 | 31.3998 | 0.3959 | 1.5723    |
| IschemicStroke | log_s_Prevotella_dentalis           | MR Egger                  | 31 | -0.2091 | 0.5793 | 0.7208 | 0.0162  | 0.0415 | 0.6992 | 23.3061 | 0.7624 | 1.6709    |
| IschemicStroke | log_s_Prevotella_dentalis           | Weighted median           | 31 | -0.0358 | 0.3090 | 0.9077 | 0.0162  | 0.0415 | 0.6992 | 23.3061 | 0.7624 | 1.6709    |
| IschemicStroke | log_s_Prevotella_dentalis           | Inverse variance weighted | 31 | 0.0008  | 0.2153 | 0.9970 | 0.0162  | 0.0415 | 0.6992 | 23.3061 | 0.7624 | 1.6709    |
| IschemicStroke | log_s_Prevotella_dentalis           | Simple mode               | 31 | 0.0267  | 0.5612 | 0.9624 | 0.0162  | 0.0415 | 0.6992 | 23.3061 | 0.7624 | 1.6709    |
| IschemicStroke | log_s_Prevotella_dentalis           | Weighted mode             | 31 | -0.0867 | 0.4296 | 0.8414 | 0.0162  | 0.0415 | 0.6992 | 23.3061 | 0.7624 | 1.6709    |
| IschemicStroke | log_s_Prevotella_marshii            | MR Egger                  | 31 | -1.0281 | 0.5817 | 0.0877 | 0.0664  | 0.0416 | 0.1213 | 30.9322 | 0.4187 | 1.4107    |
| IschemicStroke | log_s_Prevotella_marshii            | Weighted median           | 31 | -0.4398 | 0.3227 | 0.1729 | 0.0664  | 0.0416 | 0.1213 | 30.9322 | 0.4187 | 1.4107    |
| IschemicStroke | log_s_Prevotella_marshii            | Inverse variance weighted | 31 | -0.1661 | 0.2192 | 0.4485 | 0.0664  | 0.0416 | 0.1213 | 30.9322 | 0.4187 | 1.4107    |
| IschemicStroke | log_s_Prevotella_marshii            | Simple mode               | 31 | -0.4935 | 0.6402 | 0.4468 | 0.0664  | 0.0416 | 0.1213 | 30.9322 | 0.4187 | 1.4107    |
| IschemicStroke | log_s_Prevotella_marshii            | Weighted mode             | 31 | -0.5830 | 0.6257 | 0.3589 | 0.0664  | 0.0416 | 0.1213 | 30.9322 | 0.4187 | 1.4107    |
| IschemicStroke | log_s_Prevotella_melaninogenica     | MR Egger                  | 31 | 0.2863  | 0.5831 | 0.6272 | -0.0297 | 0.0417 | 0.4816 | 21.7254 | 0.8314 | 1.9305    |
| IschemicStroke | log_s_Prevotella_melaninogenica     | Weighted median           | 31 | -0.2169 | 0.3199 | 0.4976 | -0.0297 | 0.0417 | 0.4816 | 21.7254 | 0.8314 | 1.9305    |
| IschemicStroke | log_s_Prevotella_melaninogenica     | Inverse variance weighted | 31 | -0.0998 | 0.2163 | 0.6445 | -0.0297 | 0.0417 | 0.4816 | 21.7254 | 0.8314 | 1.9305    |
| IschemicStroke | log_s_Prevotella_melaninogenica     | Simple mode               | 31 | -0.2375 | 0.5771 | 0.6837 | -0.0297 | 0.0417 | 0.4816 | 21.7254 | 0.8314 | 1.9305    |
| IschemicStroke | log_s_Prevotella_melaninogenica     | Weighted mode             | 31 | -0.3056 | 0.4867 | 0.5349 | -0.0297 | 0.0417 | 0.4816 | 21.7254 | 0.8314 | 1.9305    |
| IschemicStroke | log_s_Prevotella_multiformis        | MR Egger                  | 31 | -0.8882 | 0.5817 | 0.1376 | 0.0609  | 0.0416 | 0.1542 | 19.3664 | 0.9320 | 2.9421    |
| IschemicStroke | log_s_Prevotella_multiformis        | Weighted median           | 31 | -0.4720 | 0.3190 | 0.1390 | 0.0609  | 0.0416 | 0.1542 | 19.3664 | 0.9320 | 2.9421    |
| IschemicStroke | log_s_Prevotella_multiformis        | Inverse variance weighted | 31 | -0.0981 | 0.2160 | 0.6497 | 0.0609  | 0.0416 | 0.1542 | 19.3664 | 0.9320 | 2.9421    |
| IschemicStroke | log_s_Prevotella_multiformis        | Simple mode               | 31 | -0.6032 | 0.5580 | 0.2883 | 0.0609  | 0.0416 | 0.1542 | 19.3664 | 0.9320 | 2.9421    |
| IschemicStroke | log_s_Prevotella_multiformis        | Weighted mode             | 31 | -0.5648 | 0.4502 | 0.2194 | 0.0609  | 0.0416 | 0.1542 | 19.3664 | 0.9320 | 2.9421    |
| IschemicStroke | log_s_Prevotella_multisaccharivorax | MR Egger                  | 31 | 0.0001  | 0.5994 | 0.9998 | 0.0054  | 0.0429 | 0.9013 | 30.6007 | 0.3845 | 1.0297    |
| IschemicStroke | log_s_Prevotella_multisaccharivorax | Weighted median           | 31 | -0.0400 | 0.3228 | 0.9015 | 0.0054  | 0.0429 | 0.9013 | 30.6007 | 0.3845 | 1.0297    |
| IschemicStroke | log_s_Prevotella_multisaccharivorax | Inverse variance weighted | 31 | 0.0698  | 0.2186 | 0.7495 | 0.0054  | 0.0429 | 0.9013 | 30.6007 | 0.3845 | 1.0297    |
| IschemicStroke | log_s_Prevotella_multisaccharivorax | Simple mode               | 31 | 0.1065  | 0.6573 | 0.8724 | 0.0054  | 0.0429 | 0.9013 | 30.6007 | 0.3845 | 1.0297    |
| IschemicStroke | log_s_Prevotella_multisaccharivorax | Weighted mode             | 31 | 0.1065  | 0.4610 | 0.8189 | 0.0054  | 0.0429 | 0.9013 | 30.6007 | 0.3845 | 1.0297    |
| IschemicStroke | log_s_Prevotella_nigrescens         | MR Egger                  | 31 | 0.2470  | 0.5811 | 0.6739 | 0.0162  | 0.0416 | 0.6989 | 26.7683 | 0.5842 | 1.9465    |
| IschemicStroke | log_s_Prevotella_nigrescens         | Weighted median           | 31 | 0.3728  | 0.3201 | 0.2441 | 0.0162  | 0.0416 | 0.6989 | 26.7683 | 0.5842 | 1.9465    |
| IschemicStroke | log_s_Prevotella_nigrescens         | Inverse variance weighted | 31 | 0.4578  | 0.2157 | 0.0338 | 0.0162  | 0.0416 | 0.6989 | 26.7683 | 0.5842 | 1.9465    |
| IschemicStroke | log_s_Prevotella_nigrescens         | Simple mode               | 31 | -0.2785 | 0.5825 | 0.6360 | 0.0162  | 0.0416 | 0.6989 | 26.7683 | 0.5842 | 1.9465    |
| IschemicStroke | log_s_Prevotella_nigrescens         | Weighted mode             | 31 | 0.1504  | 0.4726 | 0.7525 | 0.0162  | 0.0416 | 0.6989 | 26.7683 | 0.5842 | 1.9465    |
| IschemicStroke | log_s_Prevotella_pallens            | MR Egger                  | 31 | -0.0311 | 0.5806 | 0.9576 | -0.0118 | 0.0415 | 0.7793 | 12.2618 | 0.9972 | 2.6344    |
| IschemicStroke | log_s_Prevotella_pallens            | Weighted median           | 31 | -0.1218 | 0.3094 | 0.6938 | -0.0118 | 0.0415 | 0.7793 | 12.2618 | 0.9972 | 2.6344    |
| IschemicStroke | log_s_Prevotella_pallens            | Inverse variance weighted | 31 | -0.1837 | 0.2153 | 0.3936 | -0.0118 | 0.0415 | 0.7793 | 12.2618 | 0.9972 | 2.6344    |
| IschemicStroke | log_s_Prevotella_pallens            | Simple mode               | 31 | -0.4290 | 0.5623 | 0.4515 | -0.0118 | 0.0415 | 0.7793 | 12.2618 | 0.9972 | 2.6344    |
| IschemicStroke | log_s_Prevotella_pallens            | Weighted mode             | 31 | -0.1990 | 0.4638 | 0.6710 | -0.0118 | 0.0415 | 0.7793 | 12.2618 | 0.9972 | 2.6344    |
| IschemicStroke | log_s_Prevotella_salivae            | MR Egger                  | 31 | -0.3011 | 0.5829 | 0.6093 | 0.0272  | 0.0417 | 0.5197 | 24.9850 | 0.6790 | 1.2058    |
| IschemicStroke | log_s_Prevotella_salivae            | Weighted median           | 31 | -0.3470 | 0.3217 | 0.2807 | 0.0272  | 0.0417 | 0.5197 | 24.9850 | 0.6790 | 1.2058    |
| IschemicStroke | log_s_Prevotella_salivae            | Inverse variance weighted | 31 | 0.0516  | 0.2162 | 0.8113 | 0.0272  | 0.0417 | 0.5197 | 24.9850 | 0.6790 | 1.2058    |

|                |                                      |                           |    |         |        |        |         |        |        |         |        |         |
|----------------|--------------------------------------|---------------------------|----|---------|--------|--------|---------|--------|--------|---------|--------|---------|
| IschemicStroke | log_s_Prevotella_salivae             | Simple mode               | 31 | -0.3726 | 0.6786 | 0.5870 | 0.0272  | 0.0417 | 0.5197 | 24.9850 | 0.6790 | 1.2058  |
| IschemicStroke | log_s_Prevotella_salivae             | Weighted mode             | 31 | -0.5749 | 0.5056 | 0.2646 | 0.0272  | 0.0417 | 0.5197 | 24.9850 | 0.6790 | 1.2058  |
| IschemicStroke | log_s_Prevotella_veroralis           | MR Egger                  | 31 | -0.5821 | 0.6032 | 0.3425 | 0.0222  | 0.0432 | 0.6106 | 31.3142 | 0.3508 | 1.0920  |
| IschemicStroke | log_s_Prevotella_veroralis           | Weighted median           | 31 | -0.2258 | 0.3269 | 0.4898 | 0.0222  | 0.0432 | 0.6106 | 31.3142 | 0.3508 | 1.0920  |
| IschemicStroke | log_s_Prevotella_veroralis           | Inverse variance weighted | 31 | -0.2938 | 0.2213 | 0.1842 | 0.0222  | 0.0432 | 0.6106 | 31.3142 | 0.3508 | 1.0920  |
| IschemicStroke | log_s_Prevotella_veroralis           | Simple mode               | 31 | -0.0806 | 0.6495 | 0.9020 | 0.0222  | 0.0432 | 0.6106 | 31.3142 | 0.3508 | 1.0920  |
| IschemicStroke | log_s_Prevotella_veroralis           | Weighted mode             | 31 | -0.3896 | 0.4956 | 0.4379 | 0.0222  | 0.0432 | 0.6106 | 31.3142 | 0.3508 | 1.0920  |
| IschemicStroke | log_s_Pseudomonas_stutzeri           | MR Egger                  | 31 | 0.1521  | 0.5823 | 0.7957 | -0.0214 | 0.0417 | 0.6113 | 26.7965 | 0.5827 | 1.0763  |
| IschemicStroke | log_s_Pseudomonas_stutzeri           | Weighted median           | 31 | 0.0537  | 0.3227 | 0.8679 | -0.0214 | 0.0417 | 0.6113 | 26.7965 | 0.5827 | 1.0763  |
| IschemicStroke | log_s_Pseudomonas_stutzeri           | Inverse variance weighted | 31 | -0.1256 | 0.2164 | 0.5618 | -0.0214 | 0.0417 | 0.6113 | 26.7965 | 0.5827 | 1.0763  |
| IschemicStroke | log_s_Pseudomonas_stutzeri           | Simple mode               | 31 | 0.2516  | 0.5899 | 0.6728 | -0.0214 | 0.0417 | 0.6113 | 26.7965 | 0.5827 | 1.0763  |
| IschemicStroke | log_s_Pseudomonas_stutzeri           | Weighted mode             | 31 | 0.1374  | 0.4648 | 0.7696 | -0.0214 | 0.0417 | 0.6113 | 26.7965 | 0.5827 | 1.0763  |
| IschemicStroke | log_s_Ruminococcus_flavefaciens      | MR Egger                  | 31 | 0.3221  | 0.5894 | 0.5890 | -0.0116 | 0.0422 | 0.7846 | 25.2273 | 0.6664 | 1.3207  |
| IschemicStroke | log_s_Ruminococcus_flavefaciens      | Weighted median           | 31 | 0.5483  | 0.3165 | 0.0832 | -0.0116 | 0.0422 | 0.7846 | 25.2273 | 0.6664 | 1.3207  |
| IschemicStroke | log_s_Ruminococcus_flavefaciens      | Inverse variance weighted | 31 | 0.1711  | 0.2187 | 0.4341 | -0.0116 | 0.0422 | 0.7846 | 25.2273 | 0.6664 | 1.3207  |
| IschemicStroke | log_s_Ruminococcus_flavefaciens      | Simple mode               | 31 | 0.5999  | 0.6393 | 0.3555 | -0.0116 | 0.0422 | 0.7846 | 25.2273 | 0.6664 | 1.3207  |
| IschemicStroke | log_s_Ruminococcus_flavefaciens      | Weighted mode             | 31 | 0.6638  | 0.4587 | 0.1582 | -0.0116 | 0.0422 | 0.7846 | 25.2273 | 0.6664 | 1.3207  |
| IschemicStroke | log_s_Serratia_odorifera             | MR Egger                  | 31 | -0.2073 | 0.5792 | 0.7230 | 0.0125  | 0.0415 | 0.7651 | 20.5705 | 0.8743 | 2.2477  |
| IschemicStroke | log_s_Serratia_odorifera             | Weighted median           | 31 | 0.0820  | 0.3177 | 0.7962 | 0.0125  | 0.0415 | 0.7651 | 20.5705 | 0.8743 | 2.2477  |
| IschemicStroke | log_s_Serratia_odorifera             | Inverse variance weighted | 31 | -0.0451 | 0.2152 | 0.8340 | 0.0125  | 0.0415 | 0.7651 | 20.5705 | 0.8743 | 2.2477  |
| IschemicStroke | log_s_Serratia_odorifera             | Simple mode               | 31 | -0.2298 | 0.5743 | 0.6919 | 0.0125  | 0.0415 | 0.7651 | 20.5705 | 0.8743 | 2.2477  |
| IschemicStroke | log_s_Serratia_odorifera             | Weighted mode             | 31 | -0.0327 | 0.4837 | 0.9466 | 0.0125  | 0.0415 | 0.7651 | 20.5705 | 0.8743 | 2.2477  |
| IschemicStroke | log_s_Shewanella_putrefaciens        | MR Egger                  | 31 | -0.3329 | 0.7117 | 0.6435 | 0.0161  | 0.0509 | 0.7542 | 42.8342 | 0.0472 | 20.5099 |
| IschemicStroke | log_s_Shewanella_putrefaciens        | Weighted median           | 31 | 0.2395  | 0.3363 | 0.4763 | 0.0161  | 0.0509 | 0.7542 | 42.8342 | 0.0472 | 20.5099 |
| IschemicStroke | log_s_Shewanella_putrefaciens        | Inverse variance weighted | 31 | -0.1239 | 0.2594 | 0.6330 | 0.0161  | 0.0509 | 0.7542 | 42.8342 | 0.0472 | 20.5099 |
| IschemicStroke | log_s_Shewanella_putrefaciens        | Simple mode               | 31 | 0.2487  | 0.8182 | 0.7632 | 0.0161  | 0.0509 | 0.7542 | 42.8342 | 0.0472 | 20.5099 |
| IschemicStroke | log_s_Shewanella_putrefaciens        | Weighted mode             | 31 | 0.4465  | 0.6629 | 0.5057 | 0.0161  | 0.0509 | 0.7542 | 42.8342 | 0.0472 | 20.5099 |
| IschemicStroke | log_s_Slackia_exigua                 | MR Egger                  | 31 | -0.7536 | 0.6035 | 0.2218 | 0.0839  | 0.0432 | 0.0621 | 35.3720 | 0.2294 | 3.6758  |
| IschemicStroke | log_s_Slackia_exigua                 | Weighted median           | 31 | 0.3146  | 0.3354 | 0.3482 | 0.0839  | 0.0432 | 0.0621 | 35.3720 | 0.2294 | 3.6758  |
| IschemicStroke | log_s_Slackia_exigua                 | Inverse variance weighted | 31 | 0.3338  | 0.2343 | 0.1542 | 0.0839  | 0.0432 | 0.0621 | 35.3720 | 0.2294 | 3.6758  |
| IschemicStroke | log_s_Slackia_exigua                 | Simple mode               | 31 | 0.3149  | 0.6070 | 0.6077 | 0.0839  | 0.0432 | 0.0621 | 35.3720 | 0.2294 | 3.6758  |
| IschemicStroke | log_s_Slackia_exigua                 | Weighted mode             | 31 | 0.2775  | 0.4537 | 0.5453 | 0.0839  | 0.0432 | 0.0621 | 35.3720 | 0.2294 | 3.6758  |
| IschemicStroke | log_s_Staphylococcus_aureus          | MR Egger                  | 31 | -0.0171 | 0.6509 | 0.9792 | 0.0000  | 0.0466 | 0.9996 | 36.6099 | 0.1565 | 1.2598  |
| IschemicStroke | log_s_Staphylococcus_aureus          | Weighted median           | 31 | -0.1776 | 0.3301 | 0.5906 | 0.0000  | 0.0466 | 0.9996 | 36.6099 | 0.1565 | 1.2598  |
| IschemicStroke | log_s_Staphylococcus_aureus          | Inverse variance weighted | 31 | -0.0168 | 0.2379 | 0.9436 | 0.0000  | 0.0466 | 0.9996 | 36.6099 | 0.1565 | 1.2598  |
| IschemicStroke | log_s_Staphylococcus_aureus          | Simple mode               | 31 | -0.2443 | 0.6150 | 0.6940 | 0.0000  | 0.0466 | 0.9996 | 36.6099 | 0.1565 | 1.2598  |
| IschemicStroke | log_s_Staphylococcus_aureus          | Weighted mode             | 31 | -0.2443 | 0.4731 | 0.6093 | 0.0000  | 0.0466 | 0.9996 | 36.6099 | 0.1565 | 1.2598  |
| IschemicStroke | log_s_Streptococcus_constellatus     | MR Egger                  | 31 | -0.0817 | 0.5805 | 0.8891 | -0.0099 | 0.0416 | 0.8138 | 22.3040 | 0.8074 | 1.8990  |
| IschemicStroke | log_s_Streptococcus_constellatus     | Weighted median           | 31 | -0.1283 | 0.3040 | 0.6731 | -0.0099 | 0.0416 | 0.8138 | 22.3040 | 0.8074 | 1.8990  |
| IschemicStroke | log_s_Streptococcus_constellatus     | Inverse variance weighted | 31 | -0.2098 | 0.2158 | 0.3310 | -0.0099 | 0.0416 | 0.8138 | 22.3040 | 0.8074 | 1.8990  |
| IschemicStroke | log_s_Streptococcus_constellatus     | Simple mode               | 31 | -0.0974 | 0.5866 | 0.8692 | -0.0099 | 0.0416 | 0.8138 | 22.3040 | 0.8074 | 1.8990  |
| IschemicStroke | log_s_Streptococcus_constellatus     | Weighted mode             | 31 | -0.0836 | 0.4803 | 0.8630 | -0.0099 | 0.0416 | 0.8138 | 22.3040 | 0.8074 | 1.8990  |
| IschemicStroke | log_s_Streptococcus_cristatus        | MR Egger                  | 31 | -0.6748 | 0.5789 | 0.2533 | 0.0344  | 0.0415 | 0.4133 | 23.9999 | 0.7289 | 1.0540  |
| IschemicStroke | log_s_Streptococcus_cristatus        | Weighted median           | 31 | -0.2979 | 0.2880 | 0.3009 | 0.0344  | 0.0415 | 0.4133 | 23.9999 | 0.7289 | 1.0540  |
| IschemicStroke | log_s_Streptococcus_cristatus        | Inverse variance weighted | 31 | -0.2287 | 0.2152 | 0.2879 | 0.0344  | 0.0415 | 0.4133 | 23.9999 | 0.7289 | 1.0540  |
| IschemicStroke | log_s_Streptococcus_cristatus        | Simple mode               | 31 | -0.0265 | 0.5072 | 0.9587 | 0.0344  | 0.0415 | 0.4133 | 23.9999 | 0.7289 | 1.0540  |
| IschemicStroke | log_s_Streptococcus_cristatus        | Weighted mode             | 31 | -0.1977 | 0.4492 | 0.6630 | 0.0344  | 0.0415 | 0.4133 | 23.9999 | 0.7289 | 1.0540  |
| IschemicStroke | log_s_Streptococcus_peroris          | MR Egger                  | 31 | -0.7627 | 0.5824 | 0.2006 | 0.0315  | 0.0417 | 0.4553 | 26.1797 | 0.6159 | 9.0568  |
| IschemicStroke | log_s_Streptococcus_peroris          | Weighted median           | 31 | -0.1393 | 0.3252 | 0.6685 | 0.0315  | 0.0417 | 0.4553 | 26.1797 | 0.6159 | 9.0568  |
| IschemicStroke | log_s_Streptococcus_peroris          | Inverse variance weighted | 31 | -0.3535 | 0.2160 | 0.1017 | 0.0315  | 0.0417 | 0.4553 | 26.1797 | 0.6159 | 9.0568  |
| IschemicStroke | log_s_Streptococcus_peroris          | Simple mode               | 31 | -0.0996 | 0.6114 | 0.8717 | 0.0315  | 0.0417 | 0.4553 | 26.1797 | 0.6159 | 9.0568  |
| IschemicStroke | log_s_Streptococcus_peroris          | Weighted mode             | 31 | -0.0821 | 0.4995 | 0.8705 | 0.0315  | 0.0417 | 0.4553 | 26.1797 | 0.6159 | 9.0568  |
| IschemicStroke | log_s_Streptococcus_pseudopneumoniae | MR Egger                  | 31 | -0.7938 | 0.5827 | 0.1836 | 0.0497  | 0.0417 | 0.2429 | 24.5418 | 0.7470 | 5.9340  |
| IschemicStroke | log_s_Streptococcus_pseudopneumoniae | Weighted median           | 31 | -0.0387 | 0.3128 | 0.9015 | 0.0497  | 0.0417 | 0.2429 | 24.5418 | 0.7470 | 5.9340  |
| IschemicStroke | log_s_Streptococcus_pseudopneumoniae | Inverse variance weighted | 31 | -0.1487 | 0.2162 | 0.4914 | 0.0497  | 0.0417 | 0.2429 | 24.5418 | 0.7470 | 5.9340  |
| IschemicStroke | log_s_Streptococcus_pseudopneumoniae | Simple mode               | 31 | -0.1262 | 0.5877 | 0.8315 | 0.0497  | 0.0417 | 0.2429 | 24.5418 | 0.7470 | 5.9340  |
| IschemicStroke | log_s_Streptococcus_pseudopneumoniae | Weighted mode             | 31 | -0.0647 | 0.4210 | 0.8788 | 0.0497  | 0.0417 | 0.2429 | 24.5418 | 0.7470 | 5.9340  |
| IschemicStroke | log_s_Succinatimonas_hippei          | MR Egger                  | 31 | 0.1890  | 0.6951 | 0.7876 | -0.0010 | 0.0497 | 0.9842 | 41.4274 | 0.0632 | 10.0625 |
| IschemicStroke | log_s_Succinatimonas_hippei          | Weighted median           | 31 | -0.1653 | 0.3525 | 0.6391 | -0.0010 | 0.0497 | 0.9842 | 41.4274 | 0.0632 | 10.0625 |
| IschemicStroke | log_s_Succinatimonas_hippei          | Inverse variance weighted | 31 | 0.1762  | 0.2535 | 0.4871 | -0.0010 | 0.0497 | 0.9842 | 41.4274 | 0.0632 | 10.0625 |
| IschemicStroke | log_s_Succinatimonas_hippei          | Simple mode               | 31 | -0.7391 | 0.7632 | 0.3406 | -0.0010 | 0.0497 | 0.9842 | 41.4274 | 0.0632 | 10.0625 |

|                |                                         |                           |    |         |        |        |         |        |        |         |        |         |
|----------------|-----------------------------------------|---------------------------|----|---------|--------|--------|---------|--------|--------|---------|--------|---------|
| IschemicStroke | log_s_Succinatimonas_hippei             | Weighted mode             | 31 | -0.6080 | 0.7426 | 0.4194 | -0.0010 | 0.0497 | 0.9842 | 41.4274 | 0.0632 | 10.0625 |
| IschemicStroke | log_s_Turicibacter_sanguinis            | MR Egger                  | 31 | 0.1384  | 0.6767 | 0.8394 | 0.0070  | 0.0485 | 0.8855 | 39.5613 | 0.0914 | 3.7679  |
| IschemicStroke | log_s_Turicibacter_sanguinis            | Weighted median           | 31 | 0.1280  | 0.3116 | 0.6813 | 0.0070  | 0.0485 | 0.8855 | 39.5613 | 0.0914 | 3.7679  |
| IschemicStroke | log_s_Turicibacter_sanguinis            | Inverse variance weighted | 31 | 0.2296  | 0.2474 | 0.3535 | 0.0070  | 0.0485 | 0.8855 | 39.5613 | 0.0914 | 3.7679  |
| IschemicStroke | log_s_Turicibacter_sanguinis            | Simple mode               | 31 | 0.1818  | 0.5396 | 0.7385 | 0.0070  | 0.0485 | 0.8855 | 39.5613 | 0.0914 | 3.7679  |
| IschemicStroke | log_s_Turicibacter_sanguinis            | Weighted mode             | 31 | 0.2052  | 0.4181 | 0.6271 | 0.0070  | 0.0485 | 0.8855 | 39.5613 | 0.0914 | 3.7679  |
| IschemicStroke | log_s_Vibrio_cholerae                   | MR Egger                  | 31 | -0.5200 | 0.5809 | 0.3781 | 0.0462  | 0.0416 | 0.2754 | 24.5957 | 0.7444 | 7.5821  |
| IschemicStroke | log_s_Vibrio_cholerae                   | Weighted median           | 31 | 0.1444  | 0.3088 | 0.6401 | 0.0462  | 0.0416 | 0.2754 | 24.5957 | 0.7444 | 7.5821  |
| IschemicStroke | log_s_Vibrio_cholerae                   | Inverse variance weighted | 31 | 0.0797  | 0.2154 | 0.7113 | 0.0462  | 0.0416 | 0.2754 | 24.5957 | 0.7444 | 7.5821  |
| IschemicStroke | log_s_Vibrio_cholerae                   | Simple mode               | 31 | 0.0792  | 0.5267 | 0.8814 | 0.0462  | 0.0416 | 0.2754 | 24.5957 | 0.7444 | 7.5821  |
| IschemicStroke | log_s_Vibrio_cholerae                   | Weighted mode             | 31 | 0.0792  | 0.4375 | 0.8575 | 0.0462  | 0.0416 | 0.2754 | 24.5957 | 0.7444 | 7.5821  |
| IschemicStroke | log_s_Vibrio_furnissii                  | MR Egger                  | 31 | 0.2407  | 0.6003 | 0.6914 | -0.0216 | 0.0430 | 0.6190 | 31.1132 | 0.3601 | 1.3586  |
| IschemicStroke | log_s_Vibrio_furnissii                  | Weighted median           | 31 | 0.1613  | 0.3222 | 0.6167 | -0.0216 | 0.0430 | 0.6190 | 31.1132 | 0.3601 | 1.3586  |
| IschemicStroke | log_s_Vibrio_furnissii                  | Inverse variance weighted | 31 | -0.0395 | 0.2202 | 0.8578 | -0.0216 | 0.0430 | 0.6190 | 31.1132 | 0.3601 | 1.3586  |
| IschemicStroke | log_s_Vibrio_furnissii                  | Simple mode               | 31 | 0.1200  | 0.5856 | 0.8390 | -0.0216 | 0.0430 | 0.6190 | 31.1132 | 0.3601 | 1.3586  |
| IschemicStroke | log_s_Vibrio_furnissii                  | Weighted mode             | 31 | 0.1018  | 0.4413 | 0.8191 | -0.0216 | 0.0430 | 0.6190 | 31.1132 | 0.3601 | 1.3586  |
| IschemicStroke | log_s_unclassified_Streptococcus_oralis | MR Egger                  | 31 | -0.3785 | 0.5830 | 0.5213 | 0.0205  | 0.0417 | 0.6264 | 26.5944 | 0.5936 | 1.7764  |
| IschemicStroke | log_s_unclassified_Streptococcus_oralis | Weighted median           | 31 | 0.1754  | 0.3285 | 0.5933 | 0.0205  | 0.0417 | 0.6264 | 26.5944 | 0.5936 | 1.7764  |
| IschemicStroke | log_s_unclassified_Streptococcus_oralis | Inverse variance weighted | 31 | -0.1122 | 0.2162 | 0.6040 | 0.0205  | 0.0417 | 0.6264 | 26.5944 | 0.5936 | 1.7764  |
| IschemicStroke | log_s_unclassified_Streptococcus_oralis | Simple mode               | 31 | 0.2701  | 0.5795 | 0.6445 | 0.0205  | 0.0417 | 0.6264 | 26.5944 | 0.5936 | 1.7764  |
| IschemicStroke | log_s_unclassified_Streptococcus_oralis | Weighted mode             | 31 | 0.2546  | 0.4491 | 0.5750 | 0.0205  | 0.0417 | 0.6264 | 26.5944 | 0.5936 | 1.7764  |
| IschemicStroke | o_Actinomyetales                        | MR Egger                  | 31 | 0.0208  | 0.2249 | 0.9269 | -0.0065 | 0.0161 | 0.6904 | 17.4771 | 0.9542 | 33.8472 |
| IschemicStroke | o_Actinomyetales                        | Weighted median           | 31 | 0.0225  | 0.1201 | 0.8512 | -0.0065 | 0.0161 | 0.6904 | 17.4771 | 0.9542 | 33.8472 |
| IschemicStroke | o_Actinomyetales                        | Inverse variance weighted | 31 | -0.0632 | 0.0836 | 0.4495 | -0.0065 | 0.0161 | 0.6904 | 17.4771 | 0.9542 | 33.8472 |
| IschemicStroke | o_Actinomyetales                        | Simple mode               | 31 | 0.0333  | 0.2196 | 0.8806 | -0.0065 | 0.0161 | 0.6904 | 17.4771 | 0.9542 | 33.8472 |
| IschemicStroke | o_Actinomyetales                        | Weighted mode             | 31 | 0.0929  | 0.1752 | 0.5998 | -0.0065 | 0.0161 | 0.6904 | 17.4771 | 0.9542 | 33.8472 |
| IschemicStroke | o_Bacillales                            | MR Egger                  | 31 | -0.1860 | 0.2365 | 0.4379 | 0.0040  | 0.0169 | 0.8136 | 32.8728 | 0.2829 | 6.8414  |
| IschemicStroke | o_Bacillales                            | Weighted median           | 31 | 0.0506  | 0.1194 | 0.6718 | 0.0040  | 0.0169 | 0.8136 | 32.8728 | 0.2829 | 6.8414  |
| IschemicStroke | o_Bacillales                            | Inverse variance weighted | 31 | -0.1338 | 0.0865 | 0.1219 | 0.0040  | 0.0169 | 0.8136 | 32.8728 | 0.2829 | 6.8414  |
| IschemicStroke | o_Bacillales                            | Simple mode               | 31 | -0.0248 | 0.2167 | 0.9096 | 0.0040  | 0.0169 | 0.8136 | 32.8728 | 0.2829 | 6.8414  |
| IschemicStroke | o_Bacillales                            | Weighted mode             | 31 | 0.0456  | 0.1895 | 0.8116 | 0.0040  | 0.0169 | 0.8136 | 32.8728 | 0.2829 | 6.8414  |
| IschemicStroke | o_Campylobacterales                     | MR Egger                  | 31 | 0.2870  | 0.3225 | 0.3808 | -0.0385 | 0.0231 | 0.1058 | 23.4307 | 0.7971 | 9.4395  |
| IschemicStroke | o_Campylobacterales                     | Weighted median           | 31 | -0.1584 | 0.1686 | 0.3476 | -0.0385 | 0.0231 | 0.1058 | 23.4307 | 0.7971 | 9.4395  |
| IschemicStroke | o_Campylobacterales                     | Inverse variance weighted | 31 | -0.2128 | 0.1198 | 0.0758 | -0.0385 | 0.0231 | 0.1058 | 23.4307 | 0.7971 | 9.4395  |
| IschemicStroke | o_Campylobacterales                     | Simple mode               | 31 | -0.1638 | 0.3448 | 0.6381 | -0.0385 | 0.0231 | 0.1058 | 23.4307 | 0.7971 | 9.4395  |
| IschemicStroke | o_Campylobacterales                     | Weighted mode             | 31 | -0.0266 | 0.2780 | 0.9244 | -0.0385 | 0.0231 | 0.1058 | 23.4307 | 0.7971 | 9.4395  |
| IschemicStroke | o_Clostridiales                         | MR Egger                  | 31 | 0.0987  | 0.1799 | 0.5876 | -0.0055 | 0.0129 | 0.6726 | 26.3019 | 0.6093 | 23.0573 |
| IschemicStroke | o_Clostridiales                         | Weighted median           | 31 | -0.0222 | 0.0980 | 0.8205 | -0.0055 | 0.0129 | 0.6726 | 26.3019 | 0.6093 | 23.0573 |
| IschemicStroke | o_Clostridiales                         | Inverse variance weighted | 31 | 0.0274  | 0.0668 | 0.6824 | -0.0055 | 0.0129 | 0.6726 | 26.3019 | 0.6093 | 23.0573 |
| IschemicStroke | o_Clostridiales                         | Simple mode               | 31 | -0.1128 | 0.1907 | 0.5586 | -0.0055 | 0.0129 | 0.6726 | 26.3019 | 0.6093 | 23.0573 |
| IschemicStroke | o_Clostridiales                         | Weighted mode             | 31 | -0.0588 | 0.1615 | 0.7183 | -0.0055 | 0.0129 | 0.6726 | 26.3019 | 0.6093 | 23.0573 |
| IschemicStroke | o_Erysipelotrichales                    | MR Egger                  | 31 | -0.1489 | 0.2149 | 0.4939 | 0.0147  | 0.0154 | 0.3471 | 24.1746 | 0.7203 | 20.7014 |
| IschemicStroke | o_Erysipelotrichales                    | Weighted median           | 31 | 0.0451  | 0.1231 | 0.7144 | 0.0147  | 0.0154 | 0.3471 | 24.1746 | 0.7203 | 20.7014 |
| IschemicStroke | o_Erysipelotrichales                    | Inverse variance weighted | 31 | 0.0418  | 0.0799 | 0.6007 | 0.0147  | 0.0154 | 0.3471 | 24.1746 | 0.7203 | 20.7014 |
| IschemicStroke | o_Erysipelotrichales                    | Simple mode               | 31 | 0.0472  | 0.2130 | 0.8260 | 0.0147  | 0.0154 | 0.3471 | 24.1746 | 0.7203 | 20.7014 |
| IschemicStroke | o_Erysipelotrichales                    | Weighted mode             | 31 | 0.0472  | 0.1762 | 0.7904 | 0.0147  | 0.0154 | 0.3471 | 24.1746 | 0.7203 | 20.7014 |
| IschemicStroke | o_Pasteurellales                        | MR Egger                  | 31 | -0.8068 | 0.5269 | 0.1365 | 0.0383  | 0.0377 | 0.3187 | 28.2538 | 0.5570 | 1.5919  |
| IschemicStroke | o_Pasteurellales                        | Weighted median           | 31 | -0.1392 | 0.2962 | 0.6383 | 0.0383  | 0.0377 | 0.3187 | 28.2538 | 0.5570 | 1.5919  |
| IschemicStroke | o_Pasteurellales                        | Inverse variance weighted | 31 | -0.3105 | 0.1958 | 0.1127 | 0.0383  | 0.0377 | 0.3187 | 28.2538 | 0.5570 | 1.5919  |
| IschemicStroke | o_Pasteurellales                        | Simple mode               | 31 | 0.0844  | 0.5307 | 0.8748 | 0.0383  | 0.0377 | 0.3187 | 28.2538 | 0.5570 | 1.5919  |
| IschemicStroke | o_Pasteurellales                        | Weighted mode             | 31 | -0.1262 | 0.4213 | 0.7666 | 0.0383  | 0.0377 | 0.3187 | 28.2538 | 0.5570 | 1.5919  |
| IschemicStroke | o_Pseudomonadales                       | MR Egger                  | 31 | -0.1003 | 0.6217 | 0.8729 | -0.0040 | 0.0445 | 0.9288 | 19.0311 | 0.9205 | 1.0155  |
| IschemicStroke | o_Pseudomonadales                       | Weighted median           | 31 | -0.1278 | 0.3253 | 0.6945 | -0.0040 | 0.0445 | 0.9288 | 19.0311 | 0.9205 | 1.0155  |
| IschemicStroke | o_Pseudomonadales                       | Inverse variance weighted | 31 | -0.1524 | 0.2310 | 0.5096 | -0.0040 | 0.0445 | 0.9288 | 19.0311 | 0.9205 | 1.0155  |
| IschemicStroke | o_Pseudomonadales                       | Simple mode               | 31 | -0.0783 | 0.6258 | 0.9012 | -0.0040 | 0.0445 | 0.9288 | 19.0311 | 0.9205 | 1.0155  |
| IschemicStroke | o_Pseudomonadales                       | Weighted mode             | 31 | 0.0213  | 0.4997 | 0.9663 | -0.0040 | 0.0445 | 0.9288 | 19.0311 | 0.9205 | 1.0155  |
| IschemicStroke | o_Spirochaetales                        | MR Egger                  | 31 | 0.5263  | 0.3094 | 0.0997 | -0.0338 | 0.0222 | 0.1378 | 31.8089 | 0.3765 | 8.3034  |
| IschemicStroke | o_Spirochaetales                        | Weighted median           | 31 | 0.0968  | 0.1721 | 0.5740 | -0.0338 | 0.0222 | 0.1378 | 31.8089 | 0.3765 | 8.3034  |
| IschemicStroke | o_Spirochaetales                        | Inverse variance weighted | 31 | 0.0878  | 0.1175 | 0.4548 | -0.0338 | 0.0222 | 0.1378 | 31.8089 | 0.3765 | 8.3034  |
| IschemicStroke | o_Spirochaetales                        | Simple mode               | 31 | 0.1446  | 0.3481 | 0.6808 | -0.0338 | 0.0222 | 0.1378 | 31.8089 | 0.3765 | 8.3034  |
| IschemicStroke | o_Spirochaetales                        | Weighted mode             | 31 | 0.2003  | 0.2497 | 0.4288 | -0.0338 | 0.0222 | 0.1378 | 31.8089 | 0.3765 | 8.3034  |

|                |                              |                           |    |         |        |        |         |        |        |         |        |          |
|----------------|------------------------------|---------------------------|----|---------|--------|--------|---------|--------|--------|---------|--------|----------|
| IschemicStroke | p_Lentisphaerae              | MR Egger                  | 31 | 1.0852  | 0.8380 | 0.2055 | -0.0580 | 0.0600 | 0.3420 | 35.6666 | 0.2192 | 95.6255  |
| IschemicStroke | p_Lentisphaerae              | Weighted median           | 31 | 0.3204  | 0.4394 | 0.4659 | -0.0580 | 0.0600 | 0.3420 | 35.6666 | 0.2192 | 95.6255  |
| IschemicStroke | p_Lentisphaerae              | Inverse variance weighted | 31 | 0.3337  | 0.3111 | 0.2834 | -0.0580 | 0.0600 | 0.3420 | 35.6666 | 0.2192 | 95.6255  |
| IschemicStroke | p_Lentisphaerae              | Simple mode               | 31 | 0.3723  | 0.9124 | 0.6861 | -0.0580 | 0.0600 | 0.3420 | 35.6666 | 0.2192 | 95.6255  |
| IschemicStroke | p_Lentisphaerae              | Weighted mode             | 31 | 0.2251  | 0.6526 | 0.7325 | -0.0580 | 0.0600 | 0.3420 | 35.6666 | 0.2192 | 95.6255  |
| IschemicStroke | p_Proteobacteria             | MR Egger                  | 31 | 0.0206  | 0.2981 | 0.9453 | -0.0040 | 0.0213 | 0.8531 | 32.8815 | 0.2825 | 6.5588   |
| IschemicStroke | p_Proteobacteria             | Weighted median           | 31 | 0.0446  | 0.1557 | 0.7745 | -0.0040 | 0.0213 | 0.8531 | 32.8815 | 0.2825 | 6.5588   |
| IschemicStroke | p_Proteobacteria             | Inverse variance weighted | 31 | -0.0311 | 0.1090 | 0.7754 | -0.0040 | 0.0213 | 0.8531 | 32.8815 | 0.2825 | 6.5588   |
| IschemicStroke | p_Proteobacteria             | Simple mode               | 31 | 0.2168  | 0.2837 | 0.4508 | -0.0040 | 0.0213 | 0.8531 | 32.8815 | 0.2825 | 6.5588   |
| IschemicStroke | p_Proteobacteria             | Weighted mode             | 31 | 0.1076  | 0.2302 | 0.6434 | -0.0040 | 0.0213 | 0.8531 | 32.8815 | 0.2825 | 6.5588   |
| IschemicStroke | p_Synergistetes              | MR Egger                  | 31 | -0.2153 | 0.7067 | 0.7628 | 0.0048  | 0.0506 | 0.9254 | 19.6103 | 0.9046 | 1.7819   |
| IschemicStroke | p_Synergistetes              | Weighted median           | 31 | 0.0492  | 0.3604 | 0.8915 | 0.0048  | 0.0506 | 0.9254 | 19.6103 | 0.9046 | 1.7819   |
| IschemicStroke | p_Synergistetes              | Inverse variance weighted | 31 | -0.1534 | 0.2626 | 0.5591 | 0.0048  | 0.0506 | 0.9254 | 19.6103 | 0.9046 | 1.7819   |
| IschemicStroke | p_Synergistetes              | Simple mode               | 31 | 0.0954  | 0.7295 | 0.8968 | 0.0048  | 0.0506 | 0.9254 | 19.6103 | 0.9046 | 1.7819   |
| IschemicStroke | p_Synergistetes              | Weighted mode             | 31 | 0.1117  | 0.6308 | 0.8606 | 0.0048  | 0.0506 | 0.9254 | 19.6103 | 0.9046 | 1.7819   |
| IschemicStroke | p_Verrucomicrobia            | MR Egger                  | 31 | -2.2000 | 1.0950 | 0.0539 | 0.1643  | 0.0784 | 0.0449 | 47.6927 | 0.0213 | -32.9610 |
| IschemicStroke | p_Verrucomicrobia            | Weighted median           | 31 | -0.1289 | 0.5354 | 0.8098 | 0.1643  | 0.0784 | 0.0449 | 47.6927 | 0.0213 | -32.9610 |
| IschemicStroke | p_Verrucomicrobia            | Inverse variance weighted | 31 | -0.0692 | 0.4293 | 0.8719 | 0.1643  | 0.0784 | 0.0449 | 47.6927 | 0.0213 | -32.9610 |
| IschemicStroke | p_Verrucomicrobia            | Simple mode               | 31 | 0.8890  | 1.1805 | 0.4573 | 0.1643  | 0.0784 | 0.0449 | 47.6927 | 0.0213 | -32.9610 |
| IschemicStroke | p_Verrucomicrobia            | Weighted mode             | 31 | -0.8727 | 0.8175 | 0.2943 | 0.1643  | 0.0784 | 0.0449 | 47.6927 | 0.0213 | -32.9610 |
| IschemicStroke | s_Acidaminococcus_fermentans | MR Egger                  | 31 | 0.3761  | 0.5345 | 0.4873 | -0.0136 | 0.0383 | 0.7243 | 44.0567 | 0.0362 | 1.6446   |
| IschemicStroke | s_Acidaminococcus_fermentans | Weighted median           | 31 | 0.2693  | 0.2386 | 0.2590 | -0.0136 | 0.0383 | 0.7243 | 44.0567 | 0.0362 | 1.6446   |
| IschemicStroke | s_Acidaminococcus_fermentans | Inverse variance weighted | 31 | 0.1993  | 0.1957 | 0.3084 | -0.0136 | 0.0383 | 0.7243 | 44.0567 | 0.0362 | 1.6446   |
| IschemicStroke | s_Acidaminococcus_fermentans | Simple mode               | 31 | 0.4909  | 0.4311 | 0.2639 | -0.0136 | 0.0383 | 0.7243 | 44.0567 | 0.0362 | 1.6446   |
| IschemicStroke | s_Acidaminococcus_fermentans | Weighted mode             | 31 | 0.2755  | 0.3364 | 0.4193 | -0.0136 | 0.0383 | 0.7243 | 44.0567 | 0.0362 | 1.6446   |
| IschemicStroke | s_Actinomyces_odontolyticus  | MR Egger                  | 31 | 0.2224  | 0.3813 | 0.5643 | -0.0272 | 0.0273 | 0.3275 | 26.7609 | 0.6358 | 6.7168   |
| IschemicStroke | s_Actinomyces_odontolyticus  | Weighted median           | 31 | 0.0351  | 0.2074 | 0.8656 | -0.0272 | 0.0273 | 0.3275 | 26.7609 | 0.6358 | 6.7168   |
| IschemicStroke | s_Actinomyces_odontolyticus  | Inverse variance weighted | 31 | -0.1302 | 0.1417 | 0.3582 | -0.0272 | 0.0273 | 0.3275 | 26.7609 | 0.6358 | 6.7168   |
| IschemicStroke | s_Actinomyces_odontolyticus  | Simple mode               | 31 | 0.0095  | 0.3752 | 0.9800 | -0.0272 | 0.0273 | 0.3275 | 26.7609 | 0.6358 | 6.7168   |
| IschemicStroke | s_Actinomyces_odontolyticus  | Weighted mode             | 31 | 0.0774  | 0.2786 | 0.7831 | -0.0272 | 0.0273 | 0.3275 | 26.7609 | 0.6358 | 6.7168   |
| IschemicStroke | s_Actinomyces_viscosus       | MR Egger                  | 31 | -0.1060 | 0.3391 | 0.7569 | -0.0012 | 0.0243 | 0.9598 | 22.1018 | 0.8159 | 5.6859   |
| IschemicStroke | s_Actinomyces_viscosus       | Weighted median           | 31 | -0.2215 | 0.1773 | 0.2117 | -0.0012 | 0.0243 | 0.9598 | 22.1018 | 0.8159 | 5.6859   |
| IschemicStroke | s_Actinomyces_viscosus       | Inverse variance weighted | 31 | -0.1220 | 0.1260 | 0.3331 | -0.0012 | 0.0243 | 0.9598 | 22.1018 | 0.8159 | 5.6859   |
| IschemicStroke | s_Actinomyces_viscosus       | Simple mode               | 31 | 0.0542  | 0.3898 | 0.8902 | -0.0012 | 0.0243 | 0.9598 | 22.1018 | 0.8159 | 5.6859   |
| IschemicStroke | s_Actinomyces_viscosus       | Weighted mode             | 31 | 0.1911  | 0.3547 | 0.5941 | -0.0012 | 0.0243 | 0.9598 | 22.1018 | 0.8159 | 5.6859   |
| IschemicStroke | s_Akkermansia_muciniphila    | MR Egger                  | 31 | -1.8523 | 1.3139 | 0.1692 | 0.1400  | 0.0941 | 0.1474 | 58.0884 | 0.0016 | -16.6989 |
| IschemicStroke | s_Akkermansia_muciniphila    | Weighted median           | 31 | 0.5127  | 0.5373 | 0.3400 | 0.1400  | 0.0941 | 0.1474 | 58.0884 | 0.0016 | -16.6989 |
| IschemicStroke | s_Akkermansia_muciniphila    | Inverse variance weighted | 31 | -0.0365 | 0.4980 | 0.9415 | 0.1400  | 0.0941 | 0.1474 | 58.0884 | 0.0016 | -16.6989 |
| IschemicStroke | s_Akkermansia_muciniphila    | Simple mode               | 31 | 0.5293  | 1.1335 | 0.6439 | 0.1400  | 0.0941 | 0.1474 | 58.0884 | 0.0016 | -16.6989 |
| IschemicStroke | s_Akkermansia_muciniphila    | Weighted mode             | 31 | 0.2084  | 0.8561 | 0.8093 | 0.1400  | 0.0941 | 0.1474 | 58.0884 | 0.0016 | -16.6989 |
| IschemicStroke | s_Alistipes_shahii           | MR Egger                  | 31 | 0.9594  | 0.4900 | 0.0599 | -0.0465 | 0.0351 | 0.1955 | 33.2945 | 0.3099 | 1.0773   |
| IschemicStroke | s_Alistipes_shahii           | Weighted median           | 31 | 0.4663  | 0.2748 | 0.0897 | -0.0465 | 0.0351 | 0.1955 | 33.2945 | 0.3099 | 1.0773   |
| IschemicStroke | s_Alistipes_shahii           | Inverse variance weighted | 31 | 0.3566  | 0.1844 | 0.0532 | -0.0465 | 0.0351 | 0.1955 | 33.2945 | 0.3099 | 1.0773   |
| IschemicStroke | s_Alistipes_shahii           | Simple mode               | 31 | 0.5226  | 0.5379 | 0.3391 | -0.0465 | 0.0351 | 0.1955 | 33.2945 | 0.3099 | 1.0773   |
| IschemicStroke | s_Alistipes_shahii           | Weighted mode             | 31 | 0.6056  | 0.4059 | 0.1462 | -0.0465 | 0.0351 | 0.1955 | 33.2945 | 0.3099 | 1.0773   |
| IschemicStroke | s_Bacteroides_caccae         | MR Egger                  | 31 | -0.9295 | 0.6384 | 0.1561 | 0.0821  | 0.0457 | 0.0830 | 53.5497 | 0.0052 | 1.6433   |
| IschemicStroke | s_Bacteroides_caccae         | Weighted median           | 31 | -0.1876 | 0.2977 | 0.5286 | 0.0821  | 0.0457 | 0.0830 | 53.5497 | 0.0052 | 1.6433   |
| IschemicStroke | s_Bacteroides_caccae         | Inverse variance weighted | 31 | 0.1346  | 0.2458 | 0.5839 | 0.0821  | 0.0457 | 0.0830 | 53.5497 | 0.0052 | 1.6433   |
| IschemicStroke | s_Bacteroides_caccae         | Simple mode               | 31 | -0.3028 | 0.6434 | 0.6413 | 0.0821  | 0.0457 | 0.0830 | 53.5497 | 0.0052 | 1.6433   |
| IschemicStroke | s_Bacteroides_caccae         | Weighted mode             | 31 | -0.4030 | 0.4200 | 0.3450 | 0.0821  | 0.0457 | 0.0830 | 53.5497 | 0.0052 | 1.6433   |
| IschemicStroke | s_Bacteroides_clarus         | MR Egger                  | 31 | -0.1944 | 0.5259 | 0.7143 | 0.0360  | 0.0377 | 0.3467 | 40.4642 | 0.0962 | 1.7373   |
| IschemicStroke | s_Bacteroides_clarus         | Weighted median           | 31 | 0.3408  | 0.2603 | 0.1904 | 0.0360  | 0.0377 | 0.3467 | 40.4642 | 0.0962 | 1.7373   |
| IschemicStroke | s_Bacteroides_clarus         | Inverse variance weighted | 31 | 0.2727  | 0.1951 | 0.1622 | 0.0360  | 0.0377 | 0.3467 | 40.4642 | 0.0962 | 1.7373   |
| IschemicStroke | s_Bacteroides_clarus         | Simple mode               | 31 | 0.4309  | 0.5059 | 0.4011 | 0.0360  | 0.0377 | 0.3467 | 40.4642 | 0.0962 | 1.7373   |
| IschemicStroke | s_Bacteroides_clarus         | Weighted mode             | 31 | 0.2647  | 0.3813 | 0.4929 | 0.0360  | 0.0377 | 0.3467 | 40.4642 | 0.0962 | 1.7373   |
| IschemicStroke | s_Bacteroides_coprocola      | MR Egger                  | 31 | -0.1105 | 0.5280 | 0.8357 | 0.0456  | 0.0378 | 0.2370 | 30.5190 | 0.4393 | 1.7781   |
| IschemicStroke | s_Bacteroides_coprocola      | Weighted median           | 31 | 0.4471  | 0.2955 | 0.1303 | 0.0456  | 0.0378 | 0.2370 | 30.5190 | 0.4393 | 1.7781   |
| IschemicStroke | s_Bacteroides_coprocola      | Inverse variance weighted | 31 | 0.4814  | 0.1976 | 0.0149 | 0.0456  | 0.0378 | 0.2370 | 30.5190 | 0.4393 | 1.7781   |
| IschemicStroke | s_Bacteroides_coprocola      | Simple mode               | 31 | 0.5668  | 0.5917 | 0.3458 | 0.0456  | 0.0378 | 0.2370 | 30.5190 | 0.4393 | 1.7781   |
| IschemicStroke | s_Bacteroides_coprocola      | Weighted mode             | 31 | 0.2909  | 0.4480 | 0.5212 | 0.0456  | 0.0378 | 0.2370 | 30.5190 | 0.4393 | 1.7781   |
| IschemicStroke | s_Bacteroides_coprophilus    | MR Egger                  | 31 | 0.0716  | 0.3913 | 0.8560 | 0.0161  | 0.0280 | 0.5696 | 29.5095 | 0.4388 | 4.3966   |

|                |                             |                           |    |         |        |        |         |        |        |         |        |         |
|----------------|-----------------------------|---------------------------|----|---------|--------|--------|---------|--------|--------|---------|--------|---------|
| IschemicStroke | s_Bacteroides_coprophilus   | Weighted median           | 31 | 0.2978  | 0.2057 | 0.1476 | 0.0161  | 0.0280 | 0.5696 | 29.5095 | 0.4388 | 4.3966  |
| IschemicStroke | s_Bacteroides_coprophilus   | Inverse variance weighted | 31 | 0.2805  | 0.1441 | 0.0516 | 0.0161  | 0.0280 | 0.5696 | 29.5095 | 0.4388 | 4.3966  |
| IschemicStroke | s_Bacteroides_coprophilus   | Simple mode               | 31 | 0.4683  | 0.4276 | 0.2822 | 0.0161  | 0.0280 | 0.5696 | 29.5095 | 0.4388 | 4.3966  |
| IschemicStroke | s_Bacteroides_coprophilus   | Weighted mode             | 31 | 0.1275  | 0.3690 | 0.7321 | 0.0161  | 0.0280 | 0.5696 | 29.5095 | 0.4388 | 4.3966  |
| IschemicStroke | s_Bacteroides_dorei         | MR Egger                  | 31 | 0.2097  | 0.3888 | 0.5937 | -0.0039 | 0.0278 | 0.8898 | 39.0294 | 0.1011 | 4.6844  |
| IschemicStroke | s_Bacteroides_dorei         | Weighted median           | 31 | 0.2849  | 0.1879 | 0.1295 | -0.0039 | 0.0278 | 0.8898 | 39.0294 | 0.1011 | 4.6844  |
| IschemicStroke | s_Bacteroides_dorei         | Inverse variance weighted | 31 | 0.1592  | 0.1421 | 0.2624 | -0.0039 | 0.0278 | 0.8898 | 39.0294 | 0.1011 | 4.6844  |
| IschemicStroke | s_Bacteroides_dorei         | Simple mode               | 31 | 0.2724  | 0.3333 | 0.4202 | -0.0039 | 0.0278 | 0.8898 | 39.0294 | 0.1011 | 4.6844  |
| IschemicStroke | s_Bacteroides_dorei         | Weighted mode             | 31 | 0.2489  | 0.2465 | 0.3208 | -0.0039 | 0.0278 | 0.8898 | 39.0294 | 0.1011 | 4.6844  |
| IschemicStroke | s_Bacteroides_eggerthii     | MR Egger                  | 31 | 0.6893  | 0.3980 | 0.0939 | -0.0333 | 0.0285 | 0.2520 | 28.9416 | 0.5207 | 1.5269  |
| IschemicStroke | s_Bacteroides_eggerthii     | Weighted median           | 31 | 0.1776  | 0.2252 | 0.4304 | -0.0333 | 0.0285 | 0.2520 | 28.9416 | 0.5207 | 1.5269  |
| IschemicStroke | s_Bacteroides_eggerthii     | Inverse variance weighted | 31 | 0.2574  | 0.1479 | 0.0818 | -0.0333 | 0.0285 | 0.2520 | 28.9416 | 0.5207 | 1.5269  |
| IschemicStroke | s_Bacteroides_eggerthii     | Simple mode               | 31 | 0.0624  | 0.4568 | 0.8922 | -0.0333 | 0.0285 | 0.2520 | 28.9416 | 0.5207 | 1.5269  |
| IschemicStroke | s_Bacteroides_eggerthii     | Weighted mode             | 31 | 0.1369  | 0.3441 | 0.6936 | -0.0333 | 0.0285 | 0.2520 | 28.9416 | 0.5207 | 1.5269  |
| IschemicStroke | s_Bacteroides_finegoldii    | MR Egger                  | 31 | 0.0973  | 0.4135 | 0.8157 | 0.0096  | 0.0296 | 0.7490 | 39.5777 | 0.0911 | 3.4773  |
| IschemicStroke | s_Bacteroides_finegoldii    | Weighted median           | 31 | 0.2238  | 0.2058 | 0.2768 | 0.0096  | 0.0296 | 0.7490 | 39.5777 | 0.0911 | 3.4773  |
| IschemicStroke | s_Bacteroides_finegoldii    | Inverse variance weighted | 31 | 0.2213  | 0.1513 | 0.1436 | 0.0096  | 0.0296 | 0.7490 | 39.5777 | 0.0911 | 3.4773  |
| IschemicStroke | s_Bacteroides_finegoldii    | Simple mode               | 31 | 0.3512  | 0.3573 | 0.3336 | 0.0096  | 0.0296 | 0.7490 | 39.5777 | 0.0911 | 3.4773  |
| IschemicStroke | s_Bacteroides_finegoldii    | Weighted mode             | 31 | 0.2715  | 0.2855 | 0.3492 | 0.0096  | 0.0296 | 0.7490 | 39.5777 | 0.0911 | 3.4773  |
| IschemicStroke | s_Bacteroides_fluxus        | MR Egger                  | 31 | 0.4198  | 0.3522 | 0.2430 | -0.0230 | 0.0252 | 0.3692 | 26.4093 | 0.6035 | 8.5427  |
| IschemicStroke | s_Bacteroides_fluxus        | Weighted median           | 31 | 0.1596  | 0.1938 | 0.4102 | -0.0230 | 0.0252 | 0.3692 | 26.4093 | 0.6035 | 8.5427  |
| IschemicStroke | s_Bacteroides_fluxus        | Inverse variance weighted | 31 | 0.1215  | 0.1309 | 0.3532 | -0.0230 | 0.0252 | 0.3692 | 26.4093 | 0.6035 | 8.5427  |
| IschemicStroke | s_Bacteroides_fluxus        | Simple mode               | 31 | 0.0340  | 0.3501 | 0.9234 | -0.0230 | 0.0252 | 0.3692 | 26.4093 | 0.6035 | 8.5427  |
| IschemicStroke | s_Bacteroides_fluxus        | Weighted mode             | 31 | 0.1715  | 0.2876 | 0.5553 | -0.0230 | 0.0252 | 0.3692 | 26.4093 | 0.6035 | 8.5427  |
| IschemicStroke | s_Bacteroides_fragilis      | MR Egger                  | 31 | -0.3264 | 0.4114 | 0.4340 | 0.0445  | 0.0295 | 0.1418 | 22.6206 | 0.8305 | 1.8255  |
| IschemicStroke | s_Bacteroides_fragilis      | Weighted median           | 31 | 0.2303  | 0.2302 | 0.3171 | 0.0445  | 0.0295 | 0.1418 | 22.6206 | 0.8305 | 1.8255  |
| IschemicStroke | s_Bacteroides_fragilis      | Inverse variance weighted | 31 | 0.2504  | 0.1529 | 0.1014 | 0.0445  | 0.0295 | 0.1418 | 22.6206 | 0.8305 | 1.8255  |
| IschemicStroke | s_Bacteroides_fragilis      | Simple mode               | 31 | 0.3180  | 0.4436 | 0.4790 | 0.0445  | 0.0295 | 0.1418 | 22.6206 | 0.8305 | 1.8255  |
| IschemicStroke | s_Bacteroides_fragilis      | Weighted mode             | 31 | 0.2382  | 0.3486 | 0.4997 | 0.0445  | 0.0295 | 0.1418 | 22.6206 | 0.8305 | 1.8255  |
| IschemicStroke | s_Bacteroides_helcogenes    | MR Egger                  | 31 | -0.1157 | 0.4580 | 0.8024 | 0.0198  | 0.0328 | 0.5499 | 36.3291 | 0.1642 | 1.5448  |
| IschemicStroke | s_Bacteroides_helcogenes    | Weighted median           | 31 | 0.1927  | 0.2403 | 0.4228 | 0.0198  | 0.0328 | 0.5499 | 36.3291 | 0.1642 | 1.5448  |
| IschemicStroke | s_Bacteroides_helcogenes    | Inverse variance weighted | 31 | 0.1416  | 0.1684 | 0.4004 | 0.0198  | 0.0328 | 0.5499 | 36.3291 | 0.1642 | 1.5448  |
| IschemicStroke | s_Bacteroides_helcogenes    | Simple mode               | 31 | 0.4616  | 0.4560 | 0.3195 | 0.0198  | 0.0328 | 0.5499 | 36.3291 | 0.1642 | 1.5448  |
| IschemicStroke | s_Bacteroides_helcogenes    | Weighted mode             | 31 | 0.1478  | 0.3167 | 0.6441 | 0.0198  | 0.0328 | 0.5499 | 36.3291 | 0.1642 | 1.5448  |
| IschemicStroke | s_Bacteroides_intestinalis  | MR Egger                  | 31 | -0.0863 | 0.4919 | 0.8619 | 0.0101  | 0.0352 | 0.7772 | 38.3369 | 0.1150 | 2.4088  |
| IschemicStroke | s_Bacteroides_intestinalis  | Weighted median           | 31 | -0.0366 | 0.2393 | 0.8783 | 0.0101  | 0.0352 | 0.7772 | 38.3369 | 0.1150 | 2.4088  |
| IschemicStroke | s_Bacteroides_intestinalis  | Inverse variance weighted | 31 | 0.0441  | 0.1799 | 0.8063 | 0.0101  | 0.0352 | 0.7772 | 38.3369 | 0.1150 | 2.4088  |
| IschemicStroke | s_Bacteroides_intestinalis  | Simple mode               | 31 | -0.1875 | 0.4429 | 0.6750 | 0.0101  | 0.0352 | 0.7772 | 38.3369 | 0.1150 | 2.4088  |
| IschemicStroke | s_Bacteroides_intestinalis  | Weighted mode             | 31 | -0.0460 | 0.3253 | 0.8885 | 0.0101  | 0.0352 | 0.7772 | 38.3369 | 0.1150 | 2.4088  |
| IschemicStroke | s_Bacteroides_ovatus        | MR Egger                  | 31 | -0.2235 | 0.2761 | 0.4249 | 0.0177  | 0.0198 | 0.3773 | 32.5125 | 0.2978 | 16.2283 |
| IschemicStroke | s_Bacteroides_ovatus        | Weighted median           | 31 | -0.0738 | 0.1500 | 0.6226 | 0.0177  | 0.0198 | 0.3773 | 32.5125 | 0.2978 | 16.2283 |
| IschemicStroke | s_Bacteroides_ovatus        | Inverse variance weighted | 31 | 0.0064  | 0.1023 | 0.9503 | 0.0177  | 0.0198 | 0.3773 | 32.5125 | 0.2978 | 16.2283 |
| IschemicStroke | s_Bacteroides_ovatus        | Simple mode               | 31 | 0.0029  | 0.2870 | 0.9919 | 0.0177  | 0.0198 | 0.3773 | 32.5125 | 0.2978 | 16.2283 |
| IschemicStroke | s_Bacteroides_ovatus        | Weighted mode             | 31 | -0.0539 | 0.2204 | 0.8084 | 0.0177  | 0.0198 | 0.3773 | 32.5125 | 0.2978 | 16.2283 |
| IschemicStroke | s_Bacteroides_pectinophilus | MR Egger                  | 31 | 0.2386  | 0.2615 | 0.3690 | -0.0151 | 0.0187 | 0.4266 | 22.3407 | 0.8058 | NA      |
| IschemicStroke | s_Bacteroides_pectinophilus | Weighted median           | 31 | -0.0376 | 0.1462 | 0.7972 | -0.0151 | 0.0187 | 0.4266 | 22.3407 | 0.8058 | NA      |
| IschemicStroke | s_Bacteroides_pectinophilus | Inverse variance weighted | 31 | 0.0429  | 0.0972 | 0.6592 | -0.0151 | 0.0187 | 0.4266 | 22.3407 | 0.8058 | NA      |
| IschemicStroke | s_Bacteroides_pectinophilus | Simple mode               | 31 | -0.0773 | 0.2995 | 0.7982 | -0.0151 | 0.0187 | 0.4266 | 22.3407 | 0.8058 | NA      |
| IschemicStroke | s_Bacteroides_pectinophilus | Weighted mode             | 31 | -0.0650 | 0.2839 | 0.8205 | -0.0151 | 0.0187 | 0.4266 | 22.3407 | 0.8058 | NA      |
| IschemicStroke | s_Bacteroides_plebeius      | MR Egger                  | 31 | 0.3861  | 0.7186 | 0.5952 | 0.0092  | 0.0515 | 0.8599 | 33.6079 | 0.2539 | 3.2289  |
| IschemicStroke | s_Bacteroides_plebeius      | Weighted median           | 31 | 0.7952  | 0.3612 | 0.0277 | 0.0092  | 0.0515 | 0.8599 | 33.6079 | 0.2539 | 3.2289  |
| IschemicStroke | s_Bacteroides_plebeius      | Inverse variance weighted | 31 | 0.5048  | 0.2627 | 0.0546 | 0.0092  | 0.0515 | 0.8599 | 33.6079 | 0.2539 | 3.2289  |
| IschemicStroke | s_Bacteroides_plebeius      | Simple mode               | 31 | 0.9618  | 0.7874 | 0.2314 | 0.0092  | 0.0515 | 0.8599 | 33.6079 | 0.2539 | 3.2289  |
| IschemicStroke | s_Bacteroides_plebeius      | Weighted mode             | 31 | 0.9397  | 0.6156 | 0.1374 | 0.0092  | 0.0515 | 0.8599 | 33.6079 | 0.2539 | 3.2289  |
| IschemicStroke | s_Bacteroides_salanitronis  | MR Egger                  | 31 | 0.3570  | 0.3118 | 0.2616 | -0.0108 | 0.0223 | 0.6325 | 35.7241 | 0.1817 | 7.6454  |
| IschemicStroke | s_Bacteroides_salanitronis  | Weighted median           | 31 | 0.1607  | 0.1635 | 0.3257 | -0.0108 | 0.0223 | 0.6325 | 35.7241 | 0.1817 | 7.6454  |
| IschemicStroke | s_Bacteroides_salanitronis  | Inverse variance weighted | 31 | 0.2171  | 0.1143 | 0.0576 | -0.0108 | 0.0223 | 0.6325 | 35.7241 | 0.1817 | 7.6454  |
| IschemicStroke | s_Bacteroides_salanitronis  | Simple mode               | 31 | 0.1490  | 0.2812 | 0.6000 | -0.0108 | 0.0223 | 0.6325 | 35.7241 | 0.1817 | 7.6454  |
| IschemicStroke | s_Bacteroides_salanitronis  | Weighted mode             | 31 | 0.1770  | 0.2161 | 0.4193 | -0.0108 | 0.0223 | 0.6325 | 35.7241 | 0.1817 | 7.6454  |
| IschemicStroke | s_Bacteroides_stercoris     | MR Egger                  | 31 | 0.1665  | 0.5550 | 0.7663 | 0.0127  | 0.0397 | 0.7510 | 26.4665 | 0.6005 | 1.4176  |
| IschemicStroke | s_Bacteroides_stercoris     | Weighted median           | 31 | 0.2636  | 0.3033 | 0.3848 | 0.0127  | 0.0397 | 0.7510 | 26.4665 | 0.6005 | 1.4176  |

|                |                                |                           |    |         |        |        |         |        |        |         |        |         |
|----------------|--------------------------------|---------------------------|----|---------|--------|--------|---------|--------|--------|---------|--------|---------|
| IschemicStroke | s_Bacteroides_stercoris        | Inverse variance weighted | 31 | 0.3316  | 0.2062 | 0.1078 | 0.0127  | 0.0397 | 0.7510 | 26.4665 | 0.6005 | 1.4176  |
| IschemicStroke | s_Bacteroides_stercoris        | Simple mode               | 31 | 0.3255  | 0.5355 | 0.5479 | 0.0127  | 0.0397 | 0.7510 | 26.4665 | 0.6005 | 1.4176  |
| IschemicStroke | s_Bacteroides_stercoris        | Weighted mode             | 31 | 0.2350  | 0.4022 | 0.5633 | 0.0127  | 0.0397 | 0.7510 | 26.4665 | 0.6005 | 1.4176  |
| IschemicStroke | s_Bacteroides_thetaiotaomicron | MR Egger                  | 31 | -0.2538 | 0.2895 | 0.3877 | 0.0113  | 0.0207 | 0.5885 | 27.7225 | 0.5328 | 13.4055 |
| IschemicStroke | s_Bacteroides_thetaiotaomicron | Weighted median           | 31 | -0.1169 | 0.1649 | 0.4785 | 0.0113  | 0.0207 | 0.5885 | 27.7225 | 0.5328 | 13.4055 |
| IschemicStroke | s_Bacteroides_thetaiotaomicron | Inverse variance weighted | 31 | -0.1068 | 0.1075 | 0.3207 | 0.0113  | 0.0207 | 0.5885 | 27.7225 | 0.5328 | 13.4055 |
| IschemicStroke | s_Bacteroides_thetaiotaomicron | Simple mode               | 31 | -0.1279 | 0.3058 | 0.6787 | 0.0113  | 0.0207 | 0.5885 | 27.7225 | 0.5328 | 13.4055 |
| IschemicStroke | s_Bacteroides_thetaiotaomicron | Weighted mode             | 31 | -0.1046 | 0.2347 | 0.6592 | 0.0113  | 0.0207 | 0.5885 | 27.7225 | 0.5328 | 13.4055 |
| IschemicStroke | s_Bacteroides_uniformis        | MR Egger                  | 31 | 0.1074  | 0.3552 | 0.7645 | -0.0018 | 0.0254 | 0.9454 | 24.7902 | 0.6891 | 9.3188  |
| IschemicStroke | s_Bacteroides_uniformis        | Weighted median           | 31 | 0.1485  | 0.1904 | 0.4353 | -0.0018 | 0.0254 | 0.9454 | 24.7902 | 0.6891 | 9.3188  |
| IschemicStroke | s_Bacteroides_uniformis        | Inverse variance weighted | 31 | 0.0846  | 0.1320 | 0.5215 | -0.0018 | 0.0254 | 0.9454 | 24.7902 | 0.6891 | 9.3188  |
| IschemicStroke | s_Bacteroides_uniformis        | Simple mode               | 31 | 0.1929  | 0.3949 | 0.6288 | -0.0018 | 0.0254 | 0.9454 | 24.7902 | 0.6891 | 9.3188  |
| IschemicStroke | s_Bacteroides_uniformis        | Weighted mode             | 31 | 0.2102  | 0.2837 | 0.4644 | -0.0018 | 0.0254 | 0.9454 | 24.7902 | 0.6891 | 9.3188  |
| IschemicStroke | s_Bacteroides_xylanisolvens    | MR Egger                  | 31 | 0.0568  | 0.2979 | 0.8501 | 0.0018  | 0.0213 | 0.9333 | 21.8085 | 0.8280 | 21.7805 |
| IschemicStroke | s_Bacteroides_xylanisolvens    | Weighted median           | 31 | 0.0744  | 0.1528 | 0.6263 | 0.0018  | 0.0213 | 0.9333 | 21.8085 | 0.8280 | 21.7805 |
| IschemicStroke | s_Bacteroides_xylanisolvens    | Inverse variance weighted | 31 | 0.0801  | 0.1107 | 0.4691 | 0.0018  | 0.0213 | 0.9333 | 21.8085 | 0.8280 | 21.7805 |
| IschemicStroke | s_Bacteroides_xylanisolvens    | Simple mode               | 31 | 0.0005  | 0.2830 | 0.9987 | 0.0018  | 0.0213 | 0.9333 | 21.8085 | 0.8280 | 21.7805 |
| IschemicStroke | s_Bacteroides_xylanisolvens    | Weighted mode             | 31 | 0.0502  | 0.2261 | 0.8259 | 0.0018  | 0.0213 | 0.9333 | 21.8085 | 0.8280 | 21.7805 |
| IschemicStroke | s_Bifidobacterium_adolescentis | MR Egger                  | 31 | 0.6420  | 0.7575 | 0.4036 | -0.0599 | 0.0542 | 0.2782 | 26.3070 | 0.6594 | 9.1905  |
| IschemicStroke | s_Bifidobacterium_adolescentis | Weighted median           | 31 | 0.2489  | 0.4377 | 0.5696 | -0.0599 | 0.0542 | 0.2782 | 26.3070 | 0.6594 | 9.1905  |
| IschemicStroke | s_Bifidobacterium_adolescentis | Inverse variance weighted | 31 | -0.1352 | 0.2815 | 0.6311 | -0.0599 | 0.0542 | 0.2782 | 26.3070 | 0.6594 | 9.1905  |
| IschemicStroke | s_Bifidobacterium_adolescentis | Simple mode               | 31 | 0.1197  | 0.7260 | 0.8702 | -0.0599 | 0.0542 | 0.2782 | 26.3070 | 0.6594 | 9.1905  |
| IschemicStroke | s_Bifidobacterium_adolescentis | Weighted mode             | 31 | 0.3154  | 0.6194 | 0.6144 | -0.0599 | 0.0542 | 0.2782 | 26.3070 | 0.6594 | 9.1905  |
| IschemicStroke | s_Bifidobacterium_animalis     | MR Egger                  | 31 | -0.3477 | 0.5240 | 0.5122 | 0.0369  | 0.0375 | 0.3338 | 32.9037 | 0.3267 | 1.2617  |
| IschemicStroke | s_Bifidobacterium_animalis     | Weighted median           | 31 | 0.0301  | 0.2816 | 0.9150 | 0.0369  | 0.0375 | 0.3338 | 32.9037 | 0.3267 | 1.2617  |
| IschemicStroke | s_Bifidobacterium_animalis     | Inverse variance weighted | 31 | 0.1305  | 0.1946 | 0.5025 | 0.0369  | 0.0375 | 0.3338 | 32.9037 | 0.3267 | 1.2617  |
| IschemicStroke | s_Bifidobacterium_animalis     | Simple mode               | 31 | 0.1388  | 0.5409 | 0.7993 | 0.0369  | 0.0375 | 0.3338 | 32.9037 | 0.3267 | 1.2617  |
| IschemicStroke | s_Bifidobacterium_animalis     | Weighted mode             | 31 | -0.0423 | 0.4048 | 0.9174 | 0.0369  | 0.0375 | 0.3338 | 32.9037 | 0.3267 | 1.2617  |
| IschemicStroke | s_Bifidobacterium_bifidum      | MR Egger                  | 31 | 0.2666  | 0.8030 | 0.7422 | 0.0161  | 0.0575 | 0.7812 | 33.1910 | 0.2701 | 9.2929  |
| IschemicStroke | s_Bifidobacterium_bifidum      | Weighted median           | 31 | 0.2904  | 0.4166 | 0.4858 | 0.0161  | 0.0575 | 0.7812 | 33.1910 | 0.2701 | 9.2929  |
| IschemicStroke | s_Bifidobacterium_bifidum      | Inverse variance weighted | 31 | 0.4756  | 0.2937 | 0.1053 | 0.0161  | 0.0575 | 0.7812 | 33.1910 | 0.2701 | 9.2929  |
| IschemicStroke | s_Bifidobacterium_bifidum      | Simple mode               | 31 | 0.4502  | 0.7642 | 0.5602 | 0.0161  | 0.0575 | 0.7812 | 33.1910 | 0.2701 | 9.2929  |
| IschemicStroke | s_Bifidobacterium_bifidum      | Weighted mode             | 31 | 0.4502  | 0.5526 | 0.4217 | 0.0161  | 0.0575 | 0.7812 | 33.1910 | 0.2701 | 9.2929  |
| IschemicStroke | s_Bifidobacterium_breve        | MR Egger                  | 31 | -0.3185 | 0.5064 | 0.5343 | 0.0149  | 0.0363 | 0.6833 | 24.8514 | 0.6859 | 1.0769  |
| IschemicStroke | s_Bifidobacterium_breve        | Weighted median           | 31 | 0.0312  | 0.2763 | 0.9099 | 0.0149  | 0.0363 | 0.6833 | 24.8514 | 0.6859 | 1.0769  |
| IschemicStroke | s_Bifidobacterium_breve        | Inverse variance weighted | 31 | -0.1248 | 0.1882 | 0.5072 | 0.0149  | 0.0363 | 0.6833 | 24.8514 | 0.6859 | 1.0769  |
| IschemicStroke | s_Bifidobacterium_breve        | Simple mode               | 31 | 0.2622  | 0.5386 | 0.6300 | 0.0149  | 0.0363 | 0.6833 | 24.8514 | 0.6859 | 1.0769  |
| IschemicStroke | s_Bifidobacterium_breve        | Weighted mode             | 31 | 0.1802  | 0.4135 | 0.6661 | 0.0149  | 0.0363 | 0.6833 | 24.8514 | 0.6859 | 1.0769  |
| IschemicStroke | s_Bifidobacterium_catena       | MR Egger                  | 31 | 0.6558  | 0.5366 | 0.2315 | -0.0634 | 0.0384 | 0.1099 | 28.8347 | 0.5263 | 1.6416  |
| IschemicStroke | s_Bifidobacterium_catena       | Weighted median           | 31 | 0.1377  | 0.2893 | 0.6340 | -0.0634 | 0.0384 | 0.1099 | 28.8347 | 0.5263 | 1.6416  |
| IschemicStroke | s_Bifidobacterium_catena       | Inverse variance weighted | 31 | -0.1660 | 0.1994 | 0.4052 | -0.0634 | 0.0384 | 0.1099 | 28.8347 | 0.5263 | 1.6416  |
| IschemicStroke | s_Bifidobacterium_catena       | Simple mode               | 31 | 0.1241  | 0.6480 | 0.8494 | -0.0634 | 0.0384 | 0.1099 | 28.8347 | 0.5263 | 1.6416  |
| IschemicStroke | s_Bifidobacterium_catena       | Weighted mode             | 31 | 0.3347  | 0.4370 | 0.4497 | -0.0634 | 0.0384 | 0.1099 | 28.8347 | 0.5263 | 1.6416  |
| IschemicStroke | s_Bifidobacterium_longum       | MR Egger                  | 31 | -0.0603 | 0.4561 | 0.8957 | 0.0045  | 0.0327 | 0.8925 | 23.8520 | 0.7362 | 3.9893  |
| IschemicStroke | s_Bifidobacterium_longum       | Weighted median           | 31 | 0.0990  | 0.2387 | 0.6784 | 0.0045  | 0.0327 | 0.8925 | 23.8520 | 0.7362 | 3.9893  |
| IschemicStroke | s_Bifidobacterium_longum       | Inverse variance weighted | 31 | -0.0026 | 0.1695 | 0.9879 | 0.0045  | 0.0327 | 0.8925 | 23.8520 | 0.7362 | 3.9893  |
| IschemicStroke | s_Bifidobacterium_longum       | Simple mode               | 31 | 0.1853  | 0.4886 | 0.7073 | 0.0045  | 0.0327 | 0.8925 | 23.8520 | 0.7362 | 3.9893  |
| IschemicStroke | s_Bifidobacterium_longum       | Weighted mode             | 31 | 0.2232  | 0.3697 | 0.5504 | 0.0045  | 0.0327 | 0.8925 | 23.8520 | 0.7362 | 3.9893  |
| IschemicStroke | s_Bilophila_wadsworthia        | MR Egger                  | 31 | 0.7295  | 0.4641 | 0.1269 | -0.0358 | 0.0332 | 0.2903 | 22.9758 | 0.8163 | 1.2116  |
| IschemicStroke | s_Bilophila_wadsworthia        | Weighted median           | 31 | 0.2901  | 0.2618 | 0.2679 | -0.0358 | 0.0332 | 0.2903 | 22.9758 | 0.8163 | 1.2116  |
| IschemicStroke | s_Bilophila_wadsworthia        | Inverse variance weighted | 31 | 0.2653  | 0.1725 | 0.1240 | -0.0358 | 0.0332 | 0.2903 | 22.9758 | 0.8163 | 1.2116  |
| IschemicStroke | s_Bilophila_wadsworthia        | Simple mode               | 31 | 0.4462  | 0.4593 | 0.3391 | -0.0358 | 0.0332 | 0.2903 | 22.9758 | 0.8163 | 1.2116  |
| IschemicStroke | s_Bilophila_wadsworthia        | Weighted mode             | 31 | 0.3953  | 0.3606 | 0.2816 | -0.0358 | 0.0332 | 0.2903 | 22.9758 | 0.8163 | 1.2116  |
| IschemicStroke | s_Blautia_hansenii             | MR Egger                  | 31 | 0.1593  | 0.2043 | 0.4419 | -0.0057 | 0.0146 | 0.6971 | 12.0027 | 0.9977 | 60.6078 |
| IschemicStroke | s_Blautia_hansenii             | Weighted median           | 31 | 0.0903  | 0.0977 | 0.3553 | -0.0057 | 0.0146 | 0.6971 | 12.0027 | 0.9977 | 60.6078 |
| IschemicStroke | s_Blautia_hansenii             | Inverse variance weighted | 31 | 0.0847  | 0.0759 | 0.2644 | -0.0057 | 0.0146 | 0.6971 | 12.0027 | 0.9977 | 60.6078 |
| IschemicStroke | s_Blautia_hansenii             | Simple mode               | 31 | 0.0449  | 0.2045 | 0.8278 | -0.0057 | 0.0146 | 0.6971 | 12.0027 | 0.9977 | 60.6078 |
| IschemicStroke | s_Blautia_hansenii             | Weighted mode             | 31 | 0.1571  | 0.1620 | 0.3401 | -0.0057 | 0.0146 | 0.6971 | 12.0027 | 0.9977 | 60.6078 |
| IschemicStroke | s_Blautia_hydrogenotrophica    | MR Egger                  | 31 | 0.1049  | 0.2350 | 0.6585 | -0.0148 | 0.0168 | 0.3849 | 29.8078 | 0.4236 | 12.2410 |
| IschemicStroke | s_Blautia_hydrogenotrophica    | Weighted median           | 31 | -0.0128 | 0.1235 | 0.9176 | -0.0148 | 0.0168 | 0.3849 | 29.8078 | 0.4236 | 12.2410 |
| IschemicStroke | s_Blautia_hydrogenotrophica    | Inverse variance weighted | 31 | -0.0876 | 0.0870 | 0.3143 | -0.0148 | 0.0168 | 0.3849 | 29.8078 | 0.4236 | 12.2410 |

|                |                                 |                           |    |         |        |        |         |        |        |         |        |            |
|----------------|---------------------------------|---------------------------|----|---------|--------|--------|---------|--------|--------|---------|--------|------------|
| IschemicStroke | s_Blautia_hydrogenotrophica     | Simple mode               | 31 | -0.1589 | 0.2620 | 0.5488 | -0.0148 | 0.0168 | 0.3849 | 29.8078 | 0.4236 | 12.2410    |
| IschemicStroke | s_Blautia_hydrogenotrophica     | Weighted mode             | 31 | 0.0373  | 0.2092 | 0.8598 | -0.0148 | 0.0168 | 0.3849 | 29.8078 | 0.4236 | 12.2410    |
| IschemicStroke | s_Butyriivibrio_crossotus       | MR Egger                  | 31 | 0.3759  | 0.2925 | 0.2090 | -0.0190 | 0.0209 | 0.3709 | 22.9416 | 0.7792 | 11.9790    |
| IschemicStroke | s_Butyriivibrio_crossotus       | Weighted median           | 31 | 0.1768  | 0.1623 | 0.2759 | -0.0190 | 0.0209 | 0.3709 | 22.9416 | 0.7792 | 11.9790    |
| IschemicStroke | s_Butyriivibrio_crossotus       | Inverse variance weighted | 31 | 0.1291  | 0.1087 | 0.2351 | -0.0190 | 0.0209 | 0.3709 | 22.9416 | 0.7792 | 11.9790    |
| IschemicStroke | s_Butyriivibrio_crossotus       | Simple mode               | 31 | 0.2214  | 0.3137 | 0.4859 | -0.0190 | 0.0209 | 0.3709 | 22.9416 | 0.7792 | 11.9790    |
| IschemicStroke | s_Butyriivibrio_crossotus       | Weighted mode             | 31 | 0.2286  | 0.2659 | 0.3967 | -0.0190 | 0.0209 | 0.3709 | 22.9416 | 0.7792 | 11.9790    |
| IschemicStroke | s_Campylobacter_jejunii         | MR Egger                  | 31 | 0.6210  | 0.3860 | 0.1185 | -0.0591 | 0.0276 | 0.0412 | 41.3365 | 0.0815 | 2.1796     |
| IschemicStroke | s_Campylobacter_jejunii         | Weighted median           | 31 | -0.1445 | 0.2027 | 0.4757 | -0.0591 | 0.0276 | 0.0412 | 41.3365 | 0.0815 | 2.1796     |
| IschemicStroke | s_Campylobacter_jejunii         | Inverse variance weighted | 31 | -0.1446 | 0.1518 | 0.3405 | -0.0591 | 0.0276 | 0.0412 | 41.3365 | 0.0815 | 2.1796     |
| IschemicStroke | s_Campylobacter_jejunii         | Simple mode               | 31 | -0.6843 | 0.4711 | 0.1568 | -0.0591 | 0.0276 | 0.0412 | 41.3365 | 0.0815 | 2.1796     |
| IschemicStroke | s_Campylobacter_jejunii         | Weighted mode             | 31 | -0.5964 | 0.5401 | 0.2783 | -0.0591 | 0.0276 | 0.0412 | 41.3365 | 0.0815 | 2.1796     |
| IschemicStroke | s_Citrobacter_koseri            | MR Egger                  | 31 | -0.3830 | 0.6004 | 0.5285 | 0.0282  | 0.0430 | 0.5164 | 39.9514 | 0.0847 | 4.5730     |
| IschemicStroke | s_Citrobacter_koseri            | Weighted median           | 31 | 0.1981  | 0.2945 | 0.5011 | 0.0282  | 0.0430 | 0.5164 | 39.9514 | 0.0847 | 4.5730     |
| IschemicStroke | s_Citrobacter_koseri            | Inverse variance weighted | 31 | -0.0169 | 0.2210 | 0.9391 | 0.0282  | 0.0430 | 0.5164 | 39.9514 | 0.0847 | 4.5730     |
| IschemicStroke | s_Citrobacter_koseri            | Simple mode               | 31 | 0.5094  | 0.5905 | 0.3952 | 0.0282  | 0.0430 | 0.5164 | 39.9514 | 0.0847 | 4.5730     |
| IschemicStroke | s_Citrobacter_koseri            | Weighted mode             | 31 | 0.2750  | 0.4420 | 0.5386 | 0.0282  | 0.0430 | 0.5164 | 39.9514 | 0.0847 | 4.5730     |
| IschemicStroke | s_Citrobacter_youngae           | MR Egger                  | 31 | -0.4015 | 0.6950 | 0.5679 | 0.0187  | 0.0498 | 0.7098 | 33.9515 | 0.2410 | -1855.7258 |
| IschemicStroke | s_Citrobacter_youngae           | Weighted median           | 31 | -0.1520 | 0.3697 | 0.6809 | 0.0187  | 0.0498 | 0.7098 | 33.9515 | 0.2410 | -1855.7258 |
| IschemicStroke | s_Citrobacter_youngae           | Inverse variance weighted | 31 | -0.1591 | 0.2546 | 0.5321 | 0.0187  | 0.0498 | 0.7098 | 33.9515 | 0.2410 | -1855.7258 |
| IschemicStroke | s_Citrobacter_youngae           | Simple mode               | 31 | -0.2699 | 0.7554 | 0.7234 | 0.0187  | 0.0498 | 0.7098 | 33.9515 | 0.2410 | -1855.7258 |
| IschemicStroke | s_Citrobacter_youngae           | Weighted mode             | 31 | 0.0146  | 0.5938 | 0.9805 | 0.0187  | 0.0498 | 0.7098 | 33.9515 | 0.2410 | -1855.7258 |
| IschemicStroke | s_Clostridiales_genomosp._BVAB3 | MR Egger                  | 31 | 1.1204  | 0.5887 | 0.0670 | -0.0545 | 0.0421 | 0.2057 | 29.3375 | 0.4999 | 1.7487     |
| IschemicStroke | s_Clostridiales_genomosp._BVAB3 | Weighted median           | 31 | 0.6346  | 0.3294 | 0.0541 | -0.0545 | 0.0421 | 0.2057 | 29.3375 | 0.4999 | 1.7487     |
| IschemicStroke | s_Clostridiales_genomosp._BVAB3 | Inverse variance weighted | 31 | 0.4127  | 0.2185 | 0.0589 | -0.0545 | 0.0421 | 0.2057 | 29.3375 | 0.4999 | 1.7487     |
| IschemicStroke | s_Clostridiales_genomosp._BVAB3 | Simple mode               | 31 | 0.8727  | 0.6218 | 0.1707 | -0.0545 | 0.0421 | 0.2057 | 29.3375 | 0.4999 | 1.7487     |
| IschemicStroke | s_Clostridiales_genomosp._BVAB3 | Weighted mode             | 31 | 0.7286  | 0.4807 | 0.1401 | -0.0545 | 0.0421 | 0.2057 | 29.3375 | 0.4999 | 1.7487     |
| IschemicStroke | s_Clostridium_bartlettii        | MR Egger                  | 31 | 0.3128  | 0.3707 | 0.4057 | -0.0235 | 0.0265 | 0.3837 | 35.1567 | 0.1994 | NA         |
| IschemicStroke | s_Clostridium_bartlettii        | Weighted median           | 31 | 0.0485  | 0.1898 | 0.7984 | -0.0235 | 0.0265 | 0.3837 | 35.1567 | 0.1994 | NA         |
| IschemicStroke | s_Clostridium_bartlettii        | Inverse variance weighted | 31 | 0.0084  | 0.1373 | 0.9513 | -0.0235 | 0.0265 | 0.3837 | 35.1567 | 0.1994 | NA         |
| IschemicStroke | s_Clostridium_bartlettii        | Simple mode               | 31 | 0.3445  | 0.3536 | 0.3377 | -0.0235 | 0.0265 | 0.3837 | 35.1567 | 0.1994 | NA         |
| IschemicStroke | s_Clostridium_bartlettii        | Weighted mode             | 31 | 0.3240  | 0.3082 | 0.3016 | -0.0235 | 0.0265 | 0.3837 | 35.1567 | 0.1994 | NA         |
| IschemicStroke | s_Clostridium_bolteae           | MR Egger                  | 31 | -0.5600 | 0.4392 | 0.2124 | 0.0394  | 0.0314 | 0.2204 | 32.9869 | 0.3231 | 2.6724     |
| IschemicStroke | s_Clostridium_bolteae           | Weighted median           | 31 | -0.0050 | 0.2335 | 0.9828 | 0.0394  | 0.0314 | 0.2204 | 32.9869 | 0.3231 | 2.6724     |
| IschemicStroke | s_Clostridium_bolteae           | Inverse variance weighted | 31 | -0.0493 | 0.1648 | 0.7647 | 0.0394  | 0.0314 | 0.2204 | 32.9869 | 0.3231 | 2.6724     |
| IschemicStroke | s_Clostridium_bolteae           | Simple mode               | 31 | 0.2427  | 0.4257 | 0.5728 | 0.0394  | 0.0314 | 0.2204 | 32.9869 | 0.3231 | 2.6724     |
| IschemicStroke | s_Clostridium_bolteae           | Weighted mode             | 31 | -0.1207 | 0.3812 | 0.7538 | 0.0394  | 0.0314 | 0.2204 | 32.9869 | 0.3231 | 2.6724     |
| IschemicStroke | s_Clostridium_difficile         | MR Egger                  | 31 | 0.1789  | 0.1741 | 0.3125 | -0.0152 | 0.0125 | 0.2316 | 29.2641 | 0.5038 | NA         |
| IschemicStroke | s_Clostridium_difficile         | Weighted median           | 31 | 0.0628  | 0.0956 | 0.5114 | -0.0152 | 0.0125 | 0.2316 | 29.2641 | 0.5038 | NA         |
| IschemicStroke | s_Clostridium_difficile         | Inverse variance weighted | 31 | -0.0185 | 0.0647 | 0.7748 | -0.0152 | 0.0125 | 0.2316 | 29.2641 | 0.5038 | NA         |
| IschemicStroke | s_Clostridium_difficile         | Simple mode               | 31 | 0.0973  | 0.1919 | 0.6160 | -0.0152 | 0.0125 | 0.2316 | 29.2641 | 0.5038 | NA         |
| IschemicStroke | s_Clostridium_difficile         | Weighted mode             | 31 | 0.1212  | 0.1416 | 0.3991 | -0.0152 | 0.0125 | 0.2316 | 29.2641 | 0.5038 | NA         |
| IschemicStroke | s_Clostridium_leptum            | MR Egger                  | 31 | 0.1202  | 0.4442 | 0.7886 | -0.0043 | 0.0318 | 0.8938 | 30.8191 | 0.3740 | 2.3266     |
| IschemicStroke | s_Clostridium_leptum            | Weighted median           | 31 | 0.1674  | 0.2338 | 0.4740 | -0.0043 | 0.0318 | 0.8938 | 30.8191 | 0.3740 | 2.3266     |
| IschemicStroke | s_Clostridium_leptum            | Inverse variance weighted | 31 | 0.0647  | 0.1624 | 0.6903 | -0.0043 | 0.0318 | 0.8938 | 30.8191 | 0.3740 | 2.3266     |
| IschemicStroke | s_Clostridium_leptum            | Simple mode               | 31 | 0.3249  | 0.4564 | 0.4821 | -0.0043 | 0.0318 | 0.8938 | 30.8191 | 0.3740 | 2.3266     |
| IschemicStroke | s_Clostridium_leptum            | Weighted mode             | 31 | 0.2348  | 0.4184 | 0.5788 | -0.0043 | 0.0318 | 0.8938 | 30.8191 | 0.3740 | 2.3266     |
| IschemicStroke | s_Clostridium_methylpentosum    | MR Egger                  | 31 | 0.3132  | 0.3640 | 0.3966 | -0.0181 | 0.0261 | 0.4931 | 23.4765 | 0.7543 | 7.1140     |
| IschemicStroke | s_Clostridium_methylpentosum    | Weighted median           | 31 | 0.0920  | 0.1935 | 0.6346 | -0.0181 | 0.0261 | 0.4931 | 23.4765 | 0.7543 | 7.1140     |
| IschemicStroke | s_Clostridium_methylpentosum    | Inverse variance weighted | 31 | 0.0786  | 0.1353 | 0.5611 | -0.0181 | 0.0261 | 0.4931 | 23.4765 | 0.7543 | 7.1140     |
| IschemicStroke | s_Clostridium_methylpentosum    | Simple mode               | 31 | 0.0211  | 0.3706 | 0.9549 | -0.0181 | 0.0261 | 0.4931 | 23.4765 | 0.7543 | 7.1140     |
| IschemicStroke | s_Clostridium_methylpentosum    | Weighted mode             | 31 | 0.0383  | 0.3080 | 0.9020 | -0.0181 | 0.0261 | 0.4931 | 23.4765 | 0.7543 | 7.1140     |
| IschemicStroke | s_Clostridium_perfringens       | MR Egger                  | 31 | -0.6199 | 0.6478 | 0.3465 | 0.0236  | 0.0464 | 0.6148 | 40.6672 | 0.0736 | 1.2255     |
| IschemicStroke | s_Clostridium_perfringens       | Weighted median           | 31 | -0.3638 | 0.3160 | 0.2496 | 0.0236  | 0.0464 | 0.6148 | 40.6672 | 0.0736 | 1.2255     |
| IschemicStroke | s_Clostridium_perfringens       | Inverse variance weighted | 31 | -0.3139 | 0.2378 | 0.1867 | 0.0236  | 0.0464 | 0.6148 | 40.6672 | 0.0736 | 1.2255     |
| IschemicStroke | s_Clostridium_perfringens       | Simple mode               | 31 | 0.8076  | 0.7730 | 0.3045 | 0.0236  | 0.0464 | 0.6148 | 40.6672 | 0.0736 | 1.2255     |
| IschemicStroke | s_Clostridium_perfringens       | Weighted mode             | 31 | -0.9150 | 0.6010 | 0.1384 | 0.0236  | 0.0464 | 0.6148 | 40.6672 | 0.0736 | 1.2255     |
| IschemicStroke | s_Clostridium_amosum            | MR Egger                  | 31 | -0.1491 | 0.4596 | 0.7480 | 0.0306  | 0.0329 | 0.3607 | 23.2629 | 0.7644 | 5.8065     |
| IschemicStroke | s_Clostridium_amosum            | Weighted median           | 31 | 0.1492  | 0.2482 | 0.5479 | 0.0306  | 0.0329 | 0.3607 | 23.2629 | 0.7644 | 5.8065     |
| IschemicStroke | s_Clostridium_amosum            | Inverse variance weighted | 31 | 0.2472  | 0.1708 | 0.1477 | 0.0306  | 0.0329 | 0.3607 | 23.2629 | 0.7644 | 5.8065     |
| IschemicStroke | s_Clostridium_amosum            | Simple mode               | 31 | -0.1215 | 0.4268 | 0.7779 | 0.0306  | 0.0329 | 0.3607 | 23.2629 | 0.7644 | 5.8065     |

|                |                               |                           |    |         |        |        |         |        |        |         |        |           |
|----------------|-------------------------------|---------------------------|----|---------|--------|--------|---------|--------|--------|---------|--------|-----------|
| IschemicStroke | s_Clostridium_ramosum         | Weighted mode             | 31 | 0.0312  | 0.3569 | 0.9310 | 0.0306  | 0.0329 | 0.3607 | 23.2629 | 0.7644 | 5.8065    |
| IschemicStroke | s_Clostridium_saccharolyticum | MR Egger                  | 31 | 0.3496  | 0.2138 | 0.1128 | -0.0239 | 0.0153 | 0.1288 | 30.2592 | 0.4524 | 12.3080   |
| IschemicStroke | s_Clostridium_saccharolyticum | Weighted median           | 31 | 0.1352  | 0.1177 | 0.2504 | -0.0239 | 0.0153 | 0.1288 | 30.2592 | 0.4524 | 12.3080   |
| IschemicStroke | s_Clostridium_saccharolyticum | Inverse variance weighted | 31 | 0.0393  | 0.0798 | 0.6220 | -0.0239 | 0.0153 | 0.1288 | 30.2592 | 0.4524 | 12.3080   |
| IschemicStroke | s_Clostridium_saccharolyticum | Simple mode               | 31 | -0.1205 | 0.2339 | 0.6101 | -0.0239 | 0.0153 | 0.1288 | 30.2592 | 0.4524 | 12.3080   |
| IschemicStroke | s_Clostridium_saccharolyticum | Weighted mode             | 31 | 0.2064  | 0.1648 | 0.2200 | -0.0239 | 0.0153 | 0.1288 | 30.2592 | 0.4524 | 12.3080   |
| IschemicStroke | s_Clostridium_spiroforme      | MR Egger                  | 31 | 0.2432  | 0.4435 | 0.5876 | -0.0204 | 0.0318 | 0.5246 | 37.1336 | 0.1428 | 3.5288    |
| IschemicStroke | s_Clostridium_spiroforme      | Weighted median           | 31 | 0.1110  | 0.2116 | 0.6001 | -0.0204 | 0.0318 | 0.5246 | 37.1336 | 0.1428 | 3.5288    |
| IschemicStroke | s_Clostridium_spiroforme      | Inverse variance weighted | 31 | -0.0219 | 0.1632 | 0.8931 | -0.0204 | 0.0318 | 0.5246 | 37.1336 | 0.1428 | 3.5288    |
| IschemicStroke | s_Clostridium_spiroforme      | Simple mode               | 31 | 0.1332  | 0.3905 | 0.7354 | -0.0204 | 0.0318 | 0.5246 | 37.1336 | 0.1428 | 3.5288    |
| IschemicStroke | s_Clostridium_spiroforme      | Weighted mode             | 31 | 0.0347  | 0.3355 | 0.9183 | -0.0204 | 0.0318 | 0.5246 | 37.1336 | 0.1428 | 3.5288    |
| IschemicStroke | s_Collinsella_aerofaciens     | MR Egger                  | 31 | 0.9689  | 0.8668 | 0.2728 | -0.0438 | 0.0621 | 0.4861 | 44.4913 | 0.0329 | -545.4228 |
| IschemicStroke | s_Collinsella_aerofaciens     | Weighted median           | 31 | 0.4003  | 0.4294 | 0.3512 | -0.0438 | 0.0621 | 0.4861 | 44.4913 | 0.0329 | -545.4228 |
| IschemicStroke | s_Collinsella_aerofaciens     | Inverse variance weighted | 31 | 0.4011  | 0.3195 | 0.2093 | -0.0438 | 0.0621 | 0.4861 | 44.4913 | 0.0329 | -545.4228 |
| IschemicStroke | s_Collinsella_aerofaciens     | Simple mode               | 31 | 1.6733  | 0.8640 | 0.0623 | -0.0438 | 0.0621 | 0.4861 | 44.4913 | 0.0329 | -545.4228 |
| IschemicStroke | s_Collinsella_aerofaciens     | Weighted mode             | 31 | 1.2982  | 0.7110 | 0.0778 | -0.0438 | 0.0621 | 0.4861 | 44.4913 | 0.0329 | -545.4228 |
| IschemicStroke | s_Coprococcus_catus           | MR Egger                  | 31 | 0.4753  | 0.2542 | 0.0716 | -0.0292 | 0.0182 | 0.1197 | 35.3010 | 0.2319 | 15.5102   |
| IschemicStroke | s_Coprococcus_catus           | Weighted median           | 31 | 0.1675  | 0.1356 | 0.2167 | -0.0292 | 0.0182 | 0.1197 | 35.3010 | 0.2319 | 15.5102   |
| IschemicStroke | s_Coprococcus_catus           | Inverse variance weighted | 31 | 0.0969  | 0.0969 | 0.3173 | -0.0292 | 0.0182 | 0.1197 | 35.3010 | 0.2319 | 15.5102   |
| IschemicStroke | s_Coprococcus_catus           | Simple mode               | 31 | 0.0622  | 0.2844 | 0.8282 | -0.0292 | 0.0182 | 0.1197 | 35.3010 | 0.2319 | 15.5102   |
| IschemicStroke | s_Coprococcus_catus           | Weighted mode             | 31 | 0.1553  | 0.2100 | 0.4651 | -0.0292 | 0.0182 | 0.1197 | 35.3010 | 0.2319 | 15.5102   |
| IschemicStroke | s_Coprococcus_eutactus        | MR Egger                  | 31 | 0.7211  | 0.4236 | 0.0994 | -0.0310 | 0.0303 | 0.3151 | 19.3342 | 0.9327 | 4.9574    |
| IschemicStroke | s_Coprococcus_eutactus        | Weighted median           | 31 | 0.6268  | 0.2108 | 0.0029 | -0.0310 | 0.0303 | 0.3151 | 19.3342 | 0.9327 | 4.9574    |
| IschemicStroke | s_Coprococcus_eutactus        | Inverse variance weighted | 31 | 0.3191  | 0.1574 | 0.0426 | -0.0310 | 0.0303 | 0.3151 | 19.3342 | 0.9327 | 4.9574    |
| IschemicStroke | s_Coprococcus_eutactus        | Simple mode               | 31 | 0.7592  | 0.4355 | 0.0915 | -0.0310 | 0.0303 | 0.3151 | 19.3342 | 0.9327 | 4.9574    |
| IschemicStroke | s_Coprococcus_eutactus        | Weighted mode             | 31 | 0.7218  | 0.3464 | 0.0458 | -0.0310 | 0.0303 | 0.3151 | 19.3342 | 0.9327 | 4.9574    |
| IschemicStroke | s_Desulfovibrio_piger         | MR Egger                  | 31 | 1.5009  | 0.8462 | 0.0866 | -0.0956 | 0.0606 | 0.1255 | 25.0902 | 0.7206 | 628.1684  |
| IschemicStroke | s_Desulfovibrio_piger         | Weighted median           | 31 | 0.3125  | 0.4631 | 0.4998 | -0.0956 | 0.0606 | 0.1255 | 25.0902 | 0.7206 | 628.1684  |
| IschemicStroke | s_Desulfovibrio_piger         | Inverse variance weighted | 31 | 0.2616  | 0.3145 | 0.4056 | -0.0956 | 0.0606 | 0.1255 | 25.0902 | 0.7206 | 628.1684  |
| IschemicStroke | s_Desulfovibrio_piger         | Simple mode               | 31 | -1.1757 | 0.9641 | 0.2322 | -0.0956 | 0.0606 | 0.1255 | 25.0902 | 0.7206 | 628.1684  |
| IschemicStroke | s_Desulfovibrio_piger         | Weighted mode             | 31 | -0.8998 | 0.9354 | 0.3437 | -0.0956 | 0.0606 | 0.1255 | 25.0902 | 0.7206 | 628.1684  |
| IschemicStroke | s_Dorea_formicigenerans       | MR Egger                  | 31 | 0.5400  | 0.2736 | 0.0580 | -0.0343 | 0.0196 | 0.0902 | 41.6299 | 0.0770 | 10.0557   |
| IschemicStroke | s_Dorea_formicigenerans       | Weighted median           | 31 | 0.2918  | 0.1329 | 0.0281 | -0.0343 | 0.0196 | 0.0902 | 41.6299 | 0.0770 | 10.0557   |
| IschemicStroke | s_Dorea_formicigenerans       | Inverse variance weighted | 31 | 0.0947  | 0.1051 | 0.3676 | -0.0343 | 0.0196 | 0.0902 | 41.6299 | 0.0770 | 10.0557   |
| IschemicStroke | s_Dorea_formicigenerans       | Simple mode               | 31 | 0.3724  | 0.2826 | 0.1976 | -0.0343 | 0.0196 | 0.0902 | 41.6299 | 0.0770 | 10.0557   |
| IschemicStroke | s_Dorea_formicigenerans       | Weighted mode             | 31 | 0.3978  | 0.1952 | 0.0505 | -0.0343 | 0.0196 | 0.0902 | 41.6299 | 0.0770 | 10.0557   |
| IschemicStroke | s_Dorea_longicatena           | MR Egger                  | 31 | 0.3227  | 0.3516 | 0.3663 | -0.0095 | 0.0252 | 0.7090 | 40.8143 | 0.0715 | 3.9271    |
| IschemicStroke | s_Dorea_longicatena           | Weighted median           | 31 | 0.2102  | 0.1550 | 0.1750 | -0.0095 | 0.0252 | 0.7090 | 40.8143 | 0.0715 | 3.9271    |
| IschemicStroke | s_Dorea_longicatena           | Inverse variance weighted | 31 | 0.1997  | 0.1288 | 0.1210 | -0.0095 | 0.0252 | 0.7090 | 40.8143 | 0.0715 | 3.9271    |
| IschemicStroke | s_Dorea_longicatena           | Simple mode               | 31 | 0.1426  | 0.2843 | 0.6196 | -0.0095 | 0.0252 | 0.7090 | 40.8143 | 0.0715 | 3.9271    |
| IschemicStroke | s_Dorea_longicatena           | Weighted mode             | 31 | 0.2183  | 0.2445 | 0.3790 | -0.0095 | 0.0252 | 0.7090 | 40.8143 | 0.0715 | 3.9271    |
| IschemicStroke | s_Eggerthella_lenta           | MR Egger                  | 31 | -0.1770 | 0.5074 | 0.7297 | 0.0218  | 0.0363 | 0.5540 | 27.9282 | 0.5218 | 2.7188    |
| IschemicStroke | s_Eggerthella_lenta           | Weighted median           | 31 | 0.1429  | 0.2744 | 0.6026 | 0.0218  | 0.0363 | 0.5540 | 27.9282 | 0.5218 | 2.7188    |
| IschemicStroke | s_Eggerthella_lenta           | Inverse variance weighted | 31 | 0.1050  | 0.1885 | 0.5776 | 0.0218  | 0.0363 | 0.5540 | 27.9282 | 0.5218 | 2.7188    |
| IschemicStroke | s_Eggerthella_lenta           | Simple mode               | 31 | -0.0240 | 0.5538 | 0.9657 | 0.0218  | 0.0363 | 0.5540 | 27.9282 | 0.5218 | 2.7188    |
| IschemicStroke | s_Eggerthella_lenta           | Weighted mode             | 31 | 0.2124  | 0.4302 | 0.6251 | 0.0218  | 0.0363 | 0.5540 | 27.9282 | 0.5218 | 2.7188    |
| IschemicStroke | s_Enterobacter_aerogenes      | MR Egger                  | 31 | 0.3453  | 0.6741 | 0.6124 | -0.0423 | 0.0483 | 0.3879 | 20.2309 | 0.8856 | 1.1447    |
| IschemicStroke | s_Enterobacter_aerogenes      | Weighted median           | 31 | -0.5147 | 0.3471 | 0.1381 | -0.0423 | 0.0483 | 0.3879 | 20.2309 | 0.8856 | 1.1447    |
| IschemicStroke | s_Enterobacter_aerogenes      | Inverse variance weighted | 31 | -0.2034 | 0.2505 | 0.4169 | -0.0423 | 0.0483 | 0.3879 | 20.2309 | 0.8856 | 1.1447    |
| IschemicStroke | s_Enterobacter_aerogenes      | Simple mode               | 31 | -0.5486 | 0.6878 | 0.4314 | -0.0423 | 0.0483 | 0.3879 | 20.2309 | 0.8856 | 1.1447    |
| IschemicStroke | s_Enterobacter_aerogenes      | Weighted mode             | 31 | -0.5486 | 0.6308 | 0.3914 | -0.0423 | 0.0483 | 0.3879 | 20.2309 | 0.8856 | 1.1447    |
| IschemicStroke | s_Enterobacter_cloacae        | MR Egger                  | 31 | 0.2175  | 0.6254 | 0.7304 | -0.0239 | 0.0448 | 0.5983 | 30.3033 | 0.3990 | 4.2547    |
| IschemicStroke | s_Enterobacter_cloacae        | Weighted median           | 31 | -0.1266 | 0.3340 | 0.7048 | -0.0239 | 0.0448 | 0.5983 | 30.3033 | 0.3990 | 4.2547    |
| IschemicStroke | s_Enterobacter_cloacae        | Inverse variance weighted | 31 | -0.0918 | 0.2296 | 0.6894 | -0.0239 | 0.0448 | 0.5983 | 30.3033 | 0.3990 | 4.2547    |
| IschemicStroke | s_Enterobacter_cloacae        | Simple mode               | 31 | -0.3490 | 0.7222 | 0.6324 | -0.0239 | 0.0448 | 0.5983 | 30.3033 | 0.3990 | 4.2547    |
| IschemicStroke | s_Enterobacter_cloacae        | Weighted mode             | 31 | 0.0584  | 0.5481 | 0.9159 | -0.0239 | 0.0448 | 0.5983 | 30.3033 | 0.3990 | 4.2547    |
| IschemicStroke | s_Enterococcus_faecalis       | MR Egger                  | 31 | 0.2490  | 0.2633 | 0.3521 | -0.0221 | 0.0189 | 0.2516 | 36.5321 | 0.1912 | 15.5324   |
| IschemicStroke | s_Enterococcus_faecalis       | Weighted median           | 31 | 0.0957  | 0.1335 | 0.4738 | -0.0221 | 0.0189 | 0.2516 | 36.5321 | 0.1912 | 15.5324   |
| IschemicStroke | s_Enterococcus_faecalis       | Inverse variance weighted | 31 | -0.0369 | 0.0984 | 0.7076 | -0.0221 | 0.0189 | 0.2516 | 36.5321 | 0.1912 | 15.5324   |
| IschemicStroke | s_Enterococcus_faecalis       | Simple mode               | 31 | -0.4467 | 0.3109 | 0.1612 | -0.0221 | 0.0189 | 0.2516 | 36.5321 | 0.1912 | 15.5324   |
| IschemicStroke | s_Enterococcus_faecalis       | Weighted mode             | 31 | 0.2049  | 0.2010 | 0.3161 | -0.0221 | 0.0189 | 0.2516 | 36.5321 | 0.1912 | 15.5324   |

|                |                                |                           |    |         |        |        |         |        |        |         |        |         |
|----------------|--------------------------------|---------------------------|----|---------|--------|--------|---------|--------|--------|---------|--------|---------|
| IschemicStroke | s_Enterococcus_faecium         | MR Egger                  | 31 | 0.2253  | 0.2391 | 0.3537 | -0.0178 | 0.0171 | 0.3071 | 27.3114 | 0.6069 | 24.6066 |
| IschemicStroke | s_Enterococcus_faecium         | Weighted median           | 31 | 0.1086  | 0.1242 | 0.3815 | -0.0178 | 0.0171 | 0.3071 | 27.3114 | 0.6069 | 24.6066 |
| IschemicStroke | s_Enterococcus_faecium         | Inverse variance weighted | 31 | -0.0054 | 0.0888 | 0.9511 | -0.0178 | 0.0171 | 0.3071 | 27.3114 | 0.6069 | 24.6066 |
| IschemicStroke | s_Enterococcus_faecium         | Simple mode               | 31 | 0.0695  | 0.2544 | 0.7867 | -0.0178 | 0.0171 | 0.3071 | 27.3114 | 0.6069 | 24.6066 |
| IschemicStroke | s_Enterococcus_faecium         | Weighted mode             | 31 | 0.1406  | 0.1907 | 0.4667 | -0.0178 | 0.0171 | 0.3071 | 27.3114 | 0.6069 | 24.6066 |
| IschemicStroke | s_Escherichia_coli             | MR Egger                  | 31 | -0.3436 | 0.6093 | 0.5772 | 0.0306  | 0.0436 | 0.4891 | 44.8605 | 0.0304 | 5.7910  |
| IschemicStroke | s_Escherichia_coli             | Weighted median           | 31 | 0.0730  | 0.2876 | 0.7996 | 0.0306  | 0.0436 | 0.4891 | 44.8605 | 0.0304 | 5.7910  |
| IschemicStroke | s_Escherichia_coli             | Inverse variance weighted | 31 | 0.0528  | 0.2245 | 0.8141 | 0.0306  | 0.0436 | 0.4891 | 44.8605 | 0.0304 | 5.7910  |
| IschemicStroke | s_Escherichia_coli             | Simple mode               | 31 | 0.4899  | 0.5664 | 0.3939 | 0.0306  | 0.0436 | 0.4891 | 44.8605 | 0.0304 | 5.7910  |
| IschemicStroke | s_Escherichia_coli             | Weighted mode             | 31 | 0.1789  | 0.3991 | 0.6572 | 0.0306  | 0.0436 | 0.4891 | 44.8605 | 0.0304 | 5.7910  |
| IschemicStroke | s_Eubacterium_biforme          | MR Egger                  | 31 | 0.4690  | 0.4567 | 0.3129 | -0.0318 | 0.0327 | 0.3395 | 28.2542 | 0.5044 | 3.3993  |
| IschemicStroke | s_Eubacterium_biforme          | Weighted median           | 31 | 0.3000  | 0.2539 | 0.2373 | -0.0318 | 0.0327 | 0.3395 | 28.2542 | 0.5044 | 3.3993  |
| IschemicStroke | s_Eubacterium_biforme          | Inverse variance weighted | 31 | 0.0573  | 0.1697 | 0.7357 | -0.0318 | 0.0327 | 0.3395 | 28.2542 | 0.5044 | 3.3993  |
| IschemicStroke | s_Eubacterium_biforme          | Simple mode               | 31 | 0.2749  | 0.4591 | 0.5537 | -0.0318 | 0.0327 | 0.3395 | 28.2542 | 0.5044 | 3.3993  |
| IschemicStroke | s_Eubacterium_biforme          | Weighted mode             | 31 | 0.3987  | 0.3376 | 0.2470 | -0.0318 | 0.0327 | 0.3395 | 28.2542 | 0.5044 | 3.3993  |
| IschemicStroke | s_Eubacterium_cylindroides     | MR Egger                  | 31 | 0.4014  | 0.2403 | 0.1056 | -0.0199 | 0.0172 | 0.2558 | 25.8876 | 0.6809 | 8.0222  |
| IschemicStroke | s_Eubacterium_cylindroides     | Weighted median           | 31 | 0.1616  | 0.1316 | 0.2197 | -0.0199 | 0.0172 | 0.2558 | 25.8876 | 0.6809 | 8.0222  |
| IschemicStroke | s_Eubacterium_cylindroides     | Inverse variance weighted | 31 | 0.1428  | 0.0893 | 0.1099 | -0.0199 | 0.0172 | 0.2558 | 25.8876 | 0.6809 | 8.0222  |
| IschemicStroke | s_Eubacterium_cylindroides     | Simple mode               | 31 | -0.0667 | 0.2297 | 0.7736 | -0.0199 | 0.0172 | 0.2558 | 25.8876 | 0.6809 | 8.0222  |
| IschemicStroke | s_Eubacterium_cylindroides     | Weighted mode             | 31 | 0.1317  | 0.1743 | 0.4559 | -0.0199 | 0.0172 | 0.2558 | 25.8876 | 0.6809 | 8.0222  |
| IschemicStroke | s_Eubacterium_dolichum         | MR Egger                  | 31 | 0.0640  | 0.2684 | 0.8132 | -0.0030 | 0.0192 | 0.8785 | 25.8045 | 0.6359 | 16.8523 |
| IschemicStroke | s_Eubacterium_dolichum         | Weighted median           | 31 | 0.0127  | 0.1499 | 0.9324 | -0.0030 | 0.0192 | 0.8785 | 25.8045 | 0.6359 | 16.8523 |
| IschemicStroke | s_Eubacterium_dolichum         | Inverse variance weighted | 31 | 0.0256  | 0.0997 | 0.7975 | -0.0030 | 0.0192 | 0.8785 | 25.8045 | 0.6359 | 16.8523 |
| IschemicStroke | s_Eubacterium_dolichum         | Simple mode               | 31 | -0.1836 | 0.2935 | 0.5362 | -0.0030 | 0.0192 | 0.8785 | 25.8045 | 0.6359 | 16.8523 |
| IschemicStroke | s_Eubacterium_dolichum         | Weighted mode             | 31 | 0.0364  | 0.2294 | 0.8748 | -0.0030 | 0.0192 | 0.8785 | 25.8045 | 0.6359 | 16.8523 |
| IschemicStroke | s_Eubacterium_eligens          | MR Egger                  | 31 | -0.0545 | 0.5604 | 0.9232 | -0.0063 | 0.0401 | 0.8766 | 17.6030 | 0.9520 | 4.9200  |
| IschemicStroke | s_Eubacterium_eligens          | Weighted median           | 31 | -0.0417 | 0.2896 | 0.8855 | -0.0063 | 0.0401 | 0.8766 | 17.6030 | 0.9520 | 4.9200  |
| IschemicStroke | s_Eubacterium_eligens          | Inverse variance weighted | 31 | -0.1360 | 0.2082 | 0.5136 | -0.0063 | 0.0401 | 0.8766 | 17.6030 | 0.9520 | 4.9200  |
| IschemicStroke | s_Eubacterium_eligens          | Simple mode               | 31 | -0.4562 | 0.5499 | 0.4134 | -0.0063 | 0.0401 | 0.8766 | 17.6030 | 0.9520 | 4.9200  |
| IschemicStroke | s_Eubacterium_eligens          | Weighted mode             | 31 | -0.0583 | 0.4502 | 0.8978 | -0.0063 | 0.0401 | 0.8766 | 17.6030 | 0.9520 | 4.9200  |
| IschemicStroke | s_Eubacterium_hallii           | MR Egger                  | 31 | 0.5313  | 0.3295 | 0.1177 | -0.0324 | 0.0236 | 0.1798 | 22.8389 | 0.8218 | 13.5799 |
| IschemicStroke | s_Eubacterium_hallii           | Weighted median           | 31 | 0.1632  | 0.1702 | 0.3378 | -0.0324 | 0.0236 | 0.1798 | 22.8389 | 0.8218 | 13.5799 |
| IschemicStroke | s_Eubacterium_hallii           | Inverse variance weighted | 31 | 0.1108  | 0.1225 | 0.3658 | -0.0324 | 0.0236 | 0.1798 | 22.8389 | 0.8218 | 13.5799 |
| IschemicStroke | s_Eubacterium_hallii           | Simple mode               | 31 | 0.2074  | 0.3315 | 0.5362 | -0.0324 | 0.0236 | 0.1798 | 22.8389 | 0.8218 | 13.5799 |
| IschemicStroke | s_Eubacterium_hallii           | Weighted mode             | 31 | 0.3096  | 0.2970 | 0.3056 | -0.0324 | 0.0236 | 0.1798 | 22.8389 | 0.8218 | 13.5799 |
| IschemicStroke | s_Eubacterium_limosum          | MR Egger                  | 31 | 0.3048  | 0.2918 | 0.3049 | -0.0201 | 0.0209 | 0.3429 | 19.8161 | 0.9212 | 19.8412 |
| IschemicStroke | s_Eubacterium_limosum          | Weighted median           | 31 | 0.1189  | 0.1536 | 0.4389 | -0.0201 | 0.0209 | 0.3429 | 19.8161 | 0.9212 | 19.8412 |
| IschemicStroke | s_Eubacterium_limosum          | Inverse variance weighted | 31 | 0.0435  | 0.1084 | 0.6881 | -0.0201 | 0.0209 | 0.3429 | 19.8161 | 0.9212 | 19.8412 |
| IschemicStroke | s_Eubacterium_limosum          | Simple mode               | 31 | 0.1906  | 0.2649 | 0.4774 | -0.0201 | 0.0209 | 0.3429 | 19.8161 | 0.9212 | 19.8412 |
| IschemicStroke | s_Eubacterium_limosum          | Weighted mode             | 31 | 0.1707  | 0.2260 | 0.4560 | -0.0201 | 0.0209 | 0.3429 | 19.8161 | 0.9212 | 19.8412 |
| IschemicStroke | s_Eubacterium_rectale          | MR Egger                  | 31 | 0.3668  | 0.3830 | 0.3460 | -0.0193 | 0.0274 | 0.4883 | 24.7308 | 0.6921 | 6.2381  |
| IschemicStroke | s_Eubacterium_rectale          | Weighted median           | 31 | -0.0385 | 0.2067 | 0.8524 | -0.0193 | 0.0274 | 0.4883 | 24.7308 | 0.6921 | 6.2381  |
| IschemicStroke | s_Eubacterium_rectale          | Inverse variance weighted | 31 | 0.1172  | 0.1423 | 0.4101 | -0.0193 | 0.0274 | 0.4883 | 24.7308 | 0.6921 | 6.2381  |
| IschemicStroke | s_Eubacterium_rectale          | Simple mode               | 31 | -0.2093 | 0.4190 | 0.6210 | -0.0193 | 0.0274 | 0.4883 | 24.7308 | 0.6921 | 6.2381  |
| IschemicStroke | s_Eubacterium_rectale          | Weighted mode             | 31 | -0.1884 | 0.4469 | 0.6763 | -0.0193 | 0.0274 | 0.4883 | 24.7308 | 0.6921 | 6.2381  |
| IschemicStroke | s_Eubacterium_saburreum        | MR Egger                  | 31 | 0.6786  | 0.4096 | 0.1083 | -0.0387 | 0.0293 | 0.1976 | 34.6856 | 0.2543 | 2.0371  |
| IschemicStroke | s_Eubacterium_saburreum        | Weighted median           | 31 | 0.1892  | 0.2260 | 0.4024 | -0.0387 | 0.0293 | 0.1976 | 34.6856 | 0.2543 | 2.0371  |
| IschemicStroke | s_Eubacterium_saburreum        | Inverse variance weighted | 31 | 0.1773  | 0.1541 | 0.2499 | -0.0387 | 0.0293 | 0.1976 | 34.6856 | 0.2543 | 2.0371  |
| IschemicStroke | s_Eubacterium_saburreum        | Simple mode               | 31 | -0.3229 | 0.4598 | 0.4879 | -0.0387 | 0.0293 | 0.1976 | 34.6856 | 0.2543 | 2.0371  |
| IschemicStroke | s_Eubacterium_saburreum        | Weighted mode             | 31 | 0.1067  | 0.3345 | 0.7519 | -0.0387 | 0.0293 | 0.1976 | 34.6856 | 0.2543 | 2.0371  |
| IschemicStroke | s_Eubacterium_siraeum          | MR Egger                  | 31 | 0.8144  | 0.4727 | 0.0955 | -0.0634 | 0.0338 | 0.0711 | 34.4169 | 0.2645 | 1.9899  |
| IschemicStroke | s_Eubacterium_siraeum          | Weighted median           | 31 | 0.2028  | 0.2487 | 0.4148 | -0.0634 | 0.0338 | 0.0711 | 34.4169 | 0.2645 | 1.9899  |
| IschemicStroke | s_Eubacterium_siraeum          | Inverse variance weighted | 31 | -0.0077 | 0.1828 | 0.9663 | -0.0634 | 0.0338 | 0.0711 | 34.4169 | 0.2645 | 1.9899  |
| IschemicStroke | s_Eubacterium_siraeum          | Simple mode               | 31 | -0.4982 | 0.5661 | 0.3858 | -0.0634 | 0.0338 | 0.0711 | 34.4169 | 0.2645 | 1.9899  |
| IschemicStroke | s_Eubacterium_siraeum          | Weighted mode             | 31 | 0.4242  | 0.3966 | 0.2934 | -0.0634 | 0.0338 | 0.0711 | 34.4169 | 0.2645 | 1.9899  |
| IschemicStroke | s_Eubacterium_ventriosum       | MR Egger                  | 31 | 0.4497  | 0.3396 | 0.1958 | -0.0223 | 0.0243 | 0.3677 | 32.3183 | 0.3061 | 5.0945  |
| IschemicStroke | s_Eubacterium_ventriosum       | Weighted median           | 31 | 0.3599  | 0.1788 | 0.0441 | -0.0223 | 0.0243 | 0.3677 | 32.3183 | 0.3061 | 5.0945  |
| IschemicStroke | s_Eubacterium_ventriosum       | Inverse variance weighted | 31 | 0.1612  | 0.1259 | 0.2003 | -0.0223 | 0.0243 | 0.3677 | 32.3183 | 0.3061 | 5.0945  |
| IschemicStroke | s_Eubacterium_ventriosum       | Simple mode               | 31 | 0.3196  | 0.4017 | 0.4325 | -0.0223 | 0.0243 | 0.3677 | 32.3183 | 0.3061 | 5.0945  |
| IschemicStroke | s_Eubacterium_ventriosum       | Weighted mode             | 31 | 0.4516  | 0.2947 | 0.1359 | -0.0223 | 0.0243 | 0.3677 | 32.3183 | 0.3061 | 5.0945  |
| IschemicStroke | s_Faecalibacterium_prausnitzii | MR Egger                  | 31 | 0.0184  | 0.4145 | 0.9650 | -0.0021 | 0.0297 | 0.9448 | 36.1263 | 0.1699 | 1.2444  |

|                |                                  |                           |    |         |        |        |         |        |        |         |        |         |
|----------------|----------------------------------|---------------------------|----|---------|--------|--------|---------|--------|--------|---------|--------|---------|
| IschemicStroke | s_Faecalibacterium_prausnitzii   | Weighted median           | 31 | -0.2403 | 0.2045 | 0.2401 | -0.0021 | 0.0297 | 0.9448 | 36.1263 | 0.1699 | 1.2444  |
| IschemicStroke | s_Faecalibacterium_prausnitzii   | Inverse variance weighted | 31 | -0.0085 | 0.1515 | 0.9552 | -0.0021 | 0.0297 | 0.9448 | 36.1263 | 0.1699 | 1.2444  |
| IschemicStroke | s_Faecalibacterium_prausnitzii   | Simple mode               | 31 | -0.3578 | 0.3959 | 0.3733 | -0.0021 | 0.0297 | 0.9448 | 36.1263 | 0.1699 | 1.2444  |
| IschemicStroke | s_Faecalibacterium_prausnitzii   | Weighted mode             | 31 | -0.3173 | 0.3437 | 0.3634 | -0.0021 | 0.0297 | 0.9448 | 36.1263 | 0.1699 | 1.2444  |
| IschemicStroke | s_Gemella_sanguinis              | MR Egger                  | 31 | -0.4081 | 0.3735 | 0.2835 | 0.0183  | 0.0267 | 0.4999 | 32.7300 | 0.2888 | 3.4186  |
| IschemicStroke | s_Gemella_sanguinis              | Weighted median           | 31 | -0.0895 | 0.1934 | 0.6436 | 0.0183  | 0.0267 | 0.4999 | 32.7300 | 0.2888 | 3.4186  |
| IschemicStroke | s_Gemella_sanguinis              | Inverse variance weighted | 31 | -0.1712 | 0.1375 | 0.2133 | 0.0183  | 0.0267 | 0.4999 | 32.7300 | 0.2888 | 3.4186  |
| IschemicStroke | s_Gemella_sanguinis              | Simple mode               | 31 | -0.0038 | 0.3557 | 0.9915 | 0.0183  | 0.0267 | 0.4999 | 32.7300 | 0.2888 | 3.4186  |
| IschemicStroke | s_Gemella_sanguinis              | Weighted mode             | 31 | 0.0294  | 0.2894 | 0.9197 | 0.0183  | 0.0267 | 0.4999 | 32.7300 | 0.2888 | 3.4186  |
| IschemicStroke | s_Granulicatella_adiacens        | MR Egger                  | 31 | -0.2291 | 0.2784 | 0.4174 | -0.0003 | 0.0199 | 0.9894 | 23.8751 | 0.7351 | 8.3284  |
| IschemicStroke | s_Granulicatella_adiacens        | Weighted median           | 31 | -0.1323 | 0.1484 | 0.3725 | -0.0003 | 0.0199 | 0.9894 | 23.8751 | 0.7351 | 8.3284  |
| IschemicStroke | s_Granulicatella_adiacens        | Inverse variance weighted | 31 | -0.2325 | 0.1035 | 0.0246 | -0.0003 | 0.0199 | 0.9894 | 23.8751 | 0.7351 | 8.3284  |
| IschemicStroke | s_Granulicatella_adiacens        | Simple mode               | 31 | -0.1857 | 0.2435 | 0.4516 | -0.0003 | 0.0199 | 0.9894 | 23.8751 | 0.7351 | 8.3284  |
| IschemicStroke | s_Granulicatella_adiacens        | Weighted mode             | 31 | -0.1151 | 0.2092 | 0.5862 | -0.0003 | 0.0199 | 0.9894 | 23.8751 | 0.7351 | 8.3284  |
| IschemicStroke | s_Haemophilus_influenzae         | MR Egger                  | 31 | -1.1382 | 0.5881 | 0.0628 | 0.0626  | 0.0421 | 0.1478 | 30.1196 | 0.4595 | 1.0982  |
| IschemicStroke | s_Haemophilus_influenzae         | Weighted median           | 31 | -0.4048 | 0.3315 | 0.2220 | 0.0626  | 0.0421 | 0.1478 | 30.1196 | 0.4595 | 1.0982  |
| IschemicStroke | s_Haemophilus_influenzae         | Inverse variance weighted | 31 | -0.3263 | 0.2190 | 0.1361 | 0.0626  | 0.0421 | 0.1478 | 30.1196 | 0.4595 | 1.0982  |
| IschemicStroke | s_Haemophilus_influenzae         | Simple mode               | 31 | -0.1482 | 0.5915 | 0.8039 | 0.0626  | 0.0421 | 0.1478 | 30.1196 | 0.4595 | 1.0982  |
| IschemicStroke | s_Haemophilus_influenzae         | Weighted mode             | 31 | -0.3425 | 0.4477 | 0.4503 | 0.0626  | 0.0421 | 0.1478 | 30.1196 | 0.4595 | 1.0982  |
| IschemicStroke | s_Haemophilus_pittmaniae         | MR Egger                  | 31 | -0.5496 | 0.5920 | 0.3609 | 0.0180  | 0.0424 | 0.6739 | 26.8909 | 0.5776 | 1.5019  |
| IschemicStroke | s_Haemophilus_pittmaniae         | Weighted median           | 31 | -0.1196 | 0.3272 | 0.7146 | 0.0180  | 0.0424 | 0.6739 | 26.8909 | 0.5776 | 1.5019  |
| IschemicStroke | s_Haemophilus_pittmaniae         | Inverse variance weighted | 31 | -0.3160 | 0.2200 | 0.1509 | 0.0180  | 0.0424 | 0.6739 | 26.8909 | 0.5776 | 1.5019  |
| IschemicStroke | s_Haemophilus_pittmaniae         | Simple mode               | 31 | 0.0502  | 0.5920 | 0.9330 | 0.0180  | 0.0424 | 0.6739 | 26.8909 | 0.5776 | 1.5019  |
| IschemicStroke | s_Haemophilus_pittmaniae         | Weighted mode             | 31 | -0.1043 | 0.4638 | 0.8236 | 0.0180  | 0.0424 | 0.6739 | 26.8909 | 0.5776 | 1.5019  |
| IschemicStroke | s_Holdemania_filiformis          | MR Egger                  | 31 | -0.2250 | 0.3006 | 0.4603 | 0.0209  | 0.0215 | 0.3401 | 29.5027 | 0.4391 | 11.0285 |
| IschemicStroke | s_Holdemania_filiformis          | Weighted median           | 31 | 0.0059  | 0.1667 | 0.9716 | 0.0209  | 0.0215 | 0.3401 | 29.5027 | 0.4391 | 11.0285 |
| IschemicStroke | s_Holdemania_filiformis          | Inverse variance weighted | 31 | 0.0457  | 0.1116 | 0.6821 | 0.0209  | 0.0215 | 0.3401 | 29.5027 | 0.4391 | 11.0285 |
| IschemicStroke | s_Holdemania_filiformis          | Simple mode               | 31 | -0.1362 | 0.3130 | 0.6665 | 0.0209  | 0.0215 | 0.3401 | 29.5027 | 0.4391 | 11.0285 |
| IschemicStroke | s_Holdemania_filiformis          | Weighted mode             | 31 | 0.1034  | 0.2694 | 0.7038 | 0.0209  | 0.0215 | 0.3401 | 29.5027 | 0.4391 | 11.0285 |
| IschemicStroke | s_Klebsiella_oxytoca             | MR Egger                  | 31 | 0.2997  | 0.6001 | 0.6212 | -0.0357 | 0.0430 | 0.4133 | 25.2686 | 0.6642 | 3.0590  |
| IschemicStroke | s_Klebsiella_oxytoca             | Weighted median           | 31 | -0.1428 | 0.3209 | 0.6564 | -0.0357 | 0.0430 | 0.4133 | 25.2686 | 0.6642 | 3.0590  |
| IschemicStroke | s_Klebsiella_oxytoca             | Inverse variance weighted | 31 | -0.1626 | 0.2230 | 0.4658 | -0.0357 | 0.0430 | 0.4133 | 25.2686 | 0.6642 | 3.0590  |
| IschemicStroke | s_Klebsiella_oxytoca             | Simple mode               | 31 | -0.1933 | 0.6917 | 0.7818 | -0.0357 | 0.0430 | 0.4133 | 25.2686 | 0.6642 | 3.0590  |
| IschemicStroke | s_Klebsiella_oxytoca             | Weighted mode             | 31 | -0.1604 | 0.6294 | 0.8006 | -0.0357 | 0.0430 | 0.4133 | 25.2686 | 0.6642 | 3.0590  |
| IschemicStroke | s_Lachnospiraceae_oral_taxon_107 | MR Egger                  | 31 | 0.3536  | 0.2903 | 0.2329 | -0.0185 | 0.0208 | 0.3799 | 36.3947 | 0.1623 | 10.8278 |
| IschemicStroke | s_Lachnospiraceae_oral_taxon_107 | Weighted median           | 31 | 0.1384  | 0.1501 | 0.3564 | -0.0185 | 0.0208 | 0.3799 | 36.3947 | 0.1623 | 10.8278 |
| IschemicStroke | s_Lachnospiraceae_oral_taxon_107 | Inverse variance weighted | 31 | 0.1134  | 0.1075 | 0.2917 | -0.0185 | 0.0208 | 0.3799 | 36.3947 | 0.1623 | 10.8278 |
| IschemicStroke | s_Lachnospiraceae_oral_taxon_107 | Simple mode               | 31 | -0.3004 | 0.3498 | 0.3972 | -0.0185 | 0.0208 | 0.3799 | 36.3947 | 0.1623 | 10.8278 |
| IschemicStroke | s_Lachnospiraceae_oral_taxon_107 | Weighted mode             | 31 | 0.5212  | 0.3124 | 0.1057 | -0.0185 | 0.0208 | 0.3799 | 36.3947 | 0.1623 | 10.8278 |
| IschemicStroke | s_Lactobacillus_ruminis          | MR Egger                  | 31 | 0.3807  | 0.3192 | 0.2427 | -0.0138 | 0.0229 | 0.5517 | 26.4654 | 0.6005 | 8.7155  |
| IschemicStroke | s_Lactobacillus_ruminis          | Weighted median           | 31 | 0.3031  | 0.1726 | 0.0790 | -0.0138 | 0.0229 | 0.5517 | 26.4654 | 0.6005 | 8.7155  |
| IschemicStroke | s_Lactobacillus_ruminis          | Inverse variance weighted | 31 | 0.2023  | 0.1186 | 0.0882 | -0.0138 | 0.0229 | 0.5517 | 26.4654 | 0.6005 | 8.7155  |
| IschemicStroke | s_Lactobacillus_ruminis          | Simple mode               | 31 | 0.1410  | 0.3241 | 0.6666 | -0.0138 | 0.0229 | 0.5517 | 26.4654 | 0.6005 | 8.7155  |
| IschemicStroke | s_Lactobacillus_ruminis          | Weighted mode             | 31 | 0.2560  | 0.2398 | 0.2941 | -0.0138 | 0.0229 | 0.5517 | 26.4654 | 0.6005 | 8.7155  |
| IschemicStroke | s_Marvinbryantia_formatexigens   | MR Egger                  | 31 | 0.4893  | 0.3248 | 0.1427 | -0.0348 | 0.0233 | 0.1451 | 32.1281 | 0.3616 | 5.8997  |
| IschemicStroke | s_Marvinbryantia_formatexigens   | Weighted median           | 31 | 0.0859  | 0.1812 | 0.6354 | -0.0348 | 0.0233 | 0.1451 | 32.1281 | 0.3616 | 5.8997  |
| IschemicStroke | s_Marvinbryantia_formatexigens   | Inverse variance weighted | 31 | 0.0378  | 0.1232 | 0.7591 | -0.0348 | 0.0233 | 0.1451 | 32.1281 | 0.3616 | 5.8997  |
| IschemicStroke | s_Marvinbryantia_formatexigens   | Simple mode               | 31 | 0.5999  | 0.4662 | 0.2080 | -0.0348 | 0.0233 | 0.1451 | 32.1281 | 0.3616 | 5.8997  |
| IschemicStroke | s_Marvinbryantia_formatexigens   | Weighted mode             | 31 | 0.5999  | 0.3055 | 0.0589 | -0.0348 | 0.0233 | 0.1451 | 32.1281 | 0.3616 | 5.8997  |
| IschemicStroke | s_Megasphaera_elsdenii           | MR Egger                  | 31 | 0.3952  | 0.7583 | 0.6063 | 0.0244  | 0.0543 | 0.6571 | 33.6811 | 0.2511 | 17.1378 |
| IschemicStroke | s_Megasphaera_elsdenii           | Weighted median           | 31 | 0.4964  | 0.4023 | 0.2172 | 0.0244  | 0.0543 | 0.6571 | 33.6811 | 0.2511 | 17.1378 |
| IschemicStroke | s_Megasphaera_elsdenii           | Inverse variance weighted | 31 | 0.7109  | 0.2780 | 0.0105 | 0.0244  | 0.0543 | 0.6571 | 33.6811 | 0.2511 | 17.1378 |
| IschemicStroke | s_Megasphaera_elsdenii           | Simple mode               | 31 | 0.3955  | 0.8070 | 0.6277 | 0.0244  | 0.0543 | 0.6571 | 33.6811 | 0.2511 | 17.1378 |
| IschemicStroke | s_Megasphaera_elsdenii           | Weighted mode             | 31 | 0.2840  | 0.5638 | 0.6181 | 0.0244  | 0.0543 | 0.6571 | 33.6811 | 0.2511 | 17.1378 |
| IschemicStroke | s_Megasphaera_genomosp._type_1   | MR Egger                  | 31 | 0.4913  | 0.6042 | 0.4228 | -0.0263 | 0.0433 | 0.5479 | 31.2051 | 0.3558 | 1.8792  |
| IschemicStroke | s_Megasphaera_genomosp._type_1   | Weighted median           | 31 | 0.3441  | 0.3253 | 0.2901 | -0.0263 | 0.0433 | 0.5479 | 31.2051 | 0.3558 | 1.8792  |
| IschemicStroke | s_Megasphaera_genomosp._type_1   | Inverse variance weighted | 31 | 0.1503  | 0.2221 | 0.4987 | -0.0263 | 0.0433 | 0.5479 | 31.2051 | 0.3558 | 1.8792  |
| IschemicStroke | s_Megasphaera_genomosp._type_1   | Simple mode               | 31 | 0.5868  | 0.6692 | 0.3875 | -0.0263 | 0.0433 | 0.5479 | 31.2051 | 0.3558 | 1.8792  |
| IschemicStroke | s_Megasphaera_genomosp._type_1   | Weighted mode             | 31 | 0.3877  | 0.5098 | 0.4529 | -0.0263 | 0.0433 | 0.5479 | 31.2051 | 0.3558 | 1.8792  |
| IschemicStroke | s_Megasphaera_micronuciformis    | MR Egger                  | 31 | -0.4191 | 0.3780 | 0.2767 | 0.0048  | 0.0271 | 0.8611 | 20.9419 | 0.8613 | 6.4408  |
| IschemicStroke | s_Megasphaera_micronuciformis    | Weighted median           | 31 | -0.3153 | 0.2043 | 0.1227 | 0.0048  | 0.0271 | 0.8611 | 20.9419 | 0.8613 | 6.4408  |

|                |                                      |                           |    |         |        |        |         |        |        |         |        |            |
|----------------|--------------------------------------|---------------------------|----|---------|--------|--------|---------|--------|--------|---------|--------|------------|
| IschemicStroke | s_Megasphaera_micronuciformis        | Inverse variance weighted | 31 | -0.3572 | 0.1405 | 0.0110 | 0.0048  | 0.0271 | 0.8611 | 20.9419 | 0.8613 | 6.4408     |
| IschemicStroke | s_Megasphaera_micronuciformis        | Simple mode               | 31 | -0.3878 | 0.4113 | 0.3533 | 0.0048  | 0.0271 | 0.8611 | 20.9419 | 0.8613 | 6.4408     |
| IschemicStroke | s_Megasphaera_micronuciformis        | Weighted mode             | 31 | -0.7143 | 0.3931 | 0.0792 | 0.0048  | 0.0271 | 0.8611 | 20.9419 | 0.8613 | 6.4408     |
| IschemicStroke | s_Mitsuokella_multacida              | MR Egger                  | 31 | 0.9612  | 0.6226 | 0.1335 | -0.0410 | 0.0446 | 0.3650 | 37.4534 | 0.1350 | 11.5639    |
| IschemicStroke | s_Mitsuokella_multacida              | Weighted median           | 31 | 0.5838  | 0.3136 | 0.0627 | -0.0410 | 0.0446 | 0.3650 | 37.4534 | 0.1350 | 11.5639    |
| IschemicStroke | s_Mitsuokella_multacida              | Inverse variance weighted | 31 | 0.4292  | 0.2308 | 0.0630 | -0.0410 | 0.0446 | 0.3650 | 37.4534 | 0.1350 | 11.5639    |
| IschemicStroke | s_Mitsuokella_multacida              | Simple mode               | 31 | 0.8872  | 0.6460 | 0.1798 | -0.0410 | 0.0446 | 0.3650 | 37.4534 | 0.1350 | 11.5639    |
| IschemicStroke | s_Mitsuokella_multacida              | Weighted mode             | 31 | 0.7757  | 0.4412 | 0.0889 | -0.0410 | 0.0446 | 0.3650 | 37.4534 | 0.1350 | 11.5639    |
| IschemicStroke | s_Mobiluncus_curtisii                | MR Egger                  | 31 | 0.5837  | 0.4167 | 0.1720 | -0.0312 | 0.0298 | 0.3043 | 25.8705 | 0.6817 | 2.5514     |
| IschemicStroke | s_Mobiluncus_curtisii                | Weighted median           | 31 | 0.2831  | 0.2228 | 0.2038 | -0.0312 | 0.0298 | 0.3043 | 25.8705 | 0.6817 | 2.5514     |
| IschemicStroke | s_Mobiluncus_curtisii                | Inverse variance weighted | 31 | 0.1790  | 0.1549 | 0.2477 | -0.0312 | 0.0298 | 0.3043 | 25.8705 | 0.6817 | 2.5514     |
| IschemicStroke | s_Mobiluncus_curtisii                | Simple mode               | 31 | 0.2951  | 0.3921 | 0.4575 | -0.0312 | 0.0298 | 0.3043 | 25.8705 | 0.6817 | 2.5514     |
| IschemicStroke | s_Mobiluncus_curtisii                | Weighted mode             | 31 | 0.3566  | 0.3269 | 0.2841 | -0.0312 | 0.0298 | 0.3043 | 25.8705 | 0.6817 | 2.5514     |
| IschemicStroke | s_Oribacterium_sinu                  | MR Egger                  | 31 | -0.4310 | 0.2252 | 0.0656 | 0.0196  | 0.0161 | 0.2352 | 23.3910 | 0.7989 | 15.6867    |
| IschemicStroke | s_Oribacterium_sinu                  | Weighted median           | 31 | -0.2319 | 0.1208 | 0.0549 | 0.0196  | 0.0161 | 0.2352 | 23.3910 | 0.7989 | 15.6867    |
| IschemicStroke | s_Oribacterium_sinu                  | Inverse variance weighted | 31 | -0.1775 | 0.0837 | 0.0339 | 0.0196  | 0.0161 | 0.2352 | 23.3910 | 0.7989 | 15.6867    |
| IschemicStroke | s_Oribacterium_sinu                  | Simple mode               | 31 | -0.2504 | 0.2274 | 0.2796 | 0.0196  | 0.0161 | 0.2352 | 23.3910 | 0.7989 | 15.6867    |
| IschemicStroke | s_Oribacterium_sinu                  | Weighted mode             | 31 | -0.2854 | 0.1679 | 0.0995 | 0.0196  | 0.0161 | 0.2352 | 23.3910 | 0.7989 | 15.6867    |
| IschemicStroke | s_Parabacteroides_distasonis         | MR Egger                  | 31 | 0.2708  | 0.2590 | 0.3044 | -0.0187 | 0.0185 | 0.3210 | 31.3016 | 0.4007 | 11.0729    |
| IschemicStroke | s_Parabacteroides_distasonis         | Weighted median           | 31 | 0.0373  | 0.1465 | 0.7991 | -0.0187 | 0.0185 | 0.3210 | 31.3016 | 0.4007 | 11.0729    |
| IschemicStroke | s_Parabacteroides_distasonis         | Inverse variance weighted | 31 | 0.0280  | 0.0963 | 0.7711 | -0.0187 | 0.0185 | 0.3210 | 31.3016 | 0.4007 | 11.0729    |
| IschemicStroke | s_Parabacteroides_distasonis         | Simple mode               | 31 | -0.0437 | 0.2327 | 0.8524 | -0.0187 | 0.0185 | 0.3210 | 31.3016 | 0.4007 | 11.0729    |
| IschemicStroke | s_Parabacteroides_distasonis         | Weighted mode             | 31 | 0.0552  | 0.2013 | 0.7858 | -0.0187 | 0.0185 | 0.3210 | 31.3016 | 0.4007 | 11.0729    |
| IschemicStroke | s_Parabacteroides_merdae             | MR Egger                  | 31 | 0.3128  | 0.4496 | 0.4921 | -0.0065 | 0.0322 | 0.8418 | 29.8639 | 0.4208 | 3.4211     |
| IschemicStroke | s_Parabacteroides_merdae             | Weighted median           | 31 | 0.1553  | 0.2528 | 0.5389 | -0.0065 | 0.0322 | 0.8418 | 29.8639 | 0.4208 | 3.4211     |
| IschemicStroke | s_Parabacteroides_merdae             | Inverse variance weighted | 31 | 0.2288  | 0.1646 | 0.1646 | -0.0065 | 0.0322 | 0.8418 | 29.8639 | 0.4208 | 3.4211     |
| IschemicStroke | s_Parabacteroides_merdae             | Simple mode               | 31 | -0.1248 | 0.4659 | 0.7906 | -0.0065 | 0.0322 | 0.8418 | 29.8639 | 0.4208 | 3.4211     |
| IschemicStroke | s_Parabacteroides_merdae             | Weighted mode             | 31 | 0.0720  | 0.3427 | 0.8350 | -0.0065 | 0.0322 | 0.8418 | 29.8639 | 0.4208 | 3.4211     |
| IschemicStroke | s_Parasutterella_excrementihominis   | MR Egger                  | 31 | 0.9772  | 0.7844 | 0.2228 | -0.0467 | 0.0562 | 0.4126 | 31.5278 | 0.3410 | -3960.4975 |
| IschemicStroke | s_Parasutterella_excrementihominis   | Weighted median           | 31 | 0.3455  | 0.4262 | 0.4175 | -0.0467 | 0.0562 | 0.4126 | 31.5278 | 0.3410 | -3960.4975 |
| IschemicStroke | s_Parasutterella_excrementihominis   | Inverse variance weighted | 31 | 0.3719  | 0.2902 | 0.2000 | -0.0467 | 0.0562 | 0.4126 | 31.5278 | 0.3410 | -3960.4975 |
| IschemicStroke | s_Parasutterella_excrementihominis   | Simple mode               | 31 | -0.5304 | 0.9145 | 0.5662 | -0.0467 | 0.0562 | 0.4126 | 31.5278 | 0.3410 | -3960.4975 |
| IschemicStroke | s_Parasutterella_excrementihominis   | Weighted mode             | 31 | 0.1581  | 0.7090 | 0.8251 | -0.0467 | 0.0562 | 0.4126 | 31.5278 | 0.3410 | -3960.4975 |
| IschemicStroke | s_Peptoniphilus_lacrimalis           | MR Egger                  | 31 | 0.8280  | 0.5825 | 0.1658 | -0.0430 | 0.0417 | 0.3110 | 26.0390 | 0.6731 | 1.3876     |
| IschemicStroke | s_Peptoniphilus_lacrimalis           | Weighted median           | 31 | 0.1781  | 0.3124 | 0.5687 | -0.0430 | 0.0417 | 0.3110 | 26.0390 | 0.6731 | 1.3876     |
| IschemicStroke | s_Peptoniphilus_lacrimalis           | Inverse variance weighted | 31 | 0.2705  | 0.2165 | 0.2115 | -0.0430 | 0.0417 | 0.3110 | 26.0390 | 0.6731 | 1.3876     |
| IschemicStroke | s_Peptoniphilus_lacrimalis           | Simple mode               | 31 | 0.2909  | 0.6904 | 0.6765 | -0.0430 | 0.0417 | 0.3110 | 26.0390 | 0.6731 | 1.3876     |
| IschemicStroke | s_Peptoniphilus_lacrimalis           | Weighted mode             | 31 | 0.0333  | 0.5497 | 0.9521 | -0.0430 | 0.0417 | 0.3110 | 26.0390 | 0.6731 | 1.3876     |
| IschemicStroke | s_Peptostreptococcus_anaerobius      | MR Egger                  | 31 | 0.9405  | 0.4216 | 0.0336 | -0.0509 | 0.0302 | 0.1024 | 32.9666 | 0.3240 | 1.1273     |
| IschemicStroke | s_Peptostreptococcus_anaerobius      | Weighted median           | 31 | 0.2617  | 0.2339 | 0.2632 | -0.0509 | 0.0302 | 0.1024 | 32.9666 | 0.3240 | 1.1273     |
| IschemicStroke | s_Peptostreptococcus_anaerobius      | Inverse variance weighted | 31 | 0.2802  | 0.1615 | 0.0827 | -0.0509 | 0.0302 | 0.1024 | 32.9666 | 0.3240 | 1.1273     |
| IschemicStroke | s_Peptostreptococcus_anaerobius      | Simple mode               | 31 | 0.4352  | 0.4341 | 0.3241 | -0.0509 | 0.0302 | 0.1024 | 32.9666 | 0.3240 | 1.1273     |
| IschemicStroke | s_Peptostreptococcus_anaerobius      | Weighted mode             | 31 | 0.1238  | 0.3895 | 0.7528 | -0.0509 | 0.0302 | 0.1024 | 32.9666 | 0.3240 | 1.1273     |
| IschemicStroke | s_Peptostreptococcus_stomat          | MR Egger                  | 31 | -0.2854 | 0.5782 | 0.6252 | 0.0214  | 0.0414 | 0.6097 | 33.0890 | 0.2742 | 2.2983     |
| IschemicStroke | s_Peptostreptococcus_stomat          | Weighted median           | 31 | 0.1498  | 0.3044 | 0.6227 | 0.0214  | 0.0414 | 0.6097 | 33.0890 | 0.2742 | 2.2983     |
| IschemicStroke | s_Peptostreptococcus_stomat          | Inverse variance weighted | 31 | -0.0084 | 0.2122 | 0.9684 | 0.0214  | 0.0414 | 0.6097 | 33.0890 | 0.2742 | 2.2983     |
| IschemicStroke | s_Peptostreptococcus_stomat          | Simple mode               | 31 | 0.6368  | 0.6298 | 0.3201 | 0.0214  | 0.0414 | 0.6097 | 33.0890 | 0.2742 | 2.2983     |
| IschemicStroke | s_Peptostreptococcus_stomat          | Weighted mode             | 31 | 0.1863  | 0.5073 | 0.7160 | 0.0214  | 0.0414 | 0.6097 | 33.0890 | 0.2742 | 2.2983     |
| IschemicStroke | s_Phascalartobacterium_succinatutens | MR Egger                  | 31 | 0.2387  | 0.5048 | 0.6398 | -0.0099 | 0.0361 | 0.7859 | 22.7011 | 0.7900 | 5.9987     |
| IschemicStroke | s_Phascalartobacterium_succinatutens | Weighted median           | 31 | 0.1130  | 0.2604 | 0.6643 | -0.0099 | 0.0361 | 0.7859 | 22.7011 | 0.7900 | 5.9987     |
| IschemicStroke | s_Phascalartobacterium_succinatutens | Inverse variance weighted | 31 | 0.1102  | 0.1876 | 0.5567 | -0.0099 | 0.0361 | 0.7859 | 22.7011 | 0.7900 | 5.9987     |
| IschemicStroke | s_Phascalartobacterium_succinatutens | Simple mode               | 31 | 0.0037  | 0.4801 | 0.9938 | -0.0099 | 0.0361 | 0.7859 | 22.7011 | 0.7900 | 5.9987     |
| IschemicStroke | s_Phascalartobacterium_succinatutens | Weighted mode             | 31 | 0.2238  | 0.3701 | 0.5500 | -0.0099 | 0.0361 | 0.7859 | 22.7011 | 0.7900 | 5.9987     |
| IschemicStroke | s_Porphyrromonas_asaccharolytica     | MR Egger                  | 31 | 0.4033  | 0.4412 | 0.3682 | -0.0259 | 0.0316 | 0.4184 | 25.8063 | 0.6358 | 3.3989     |
| IschemicStroke | s_Porphyrromonas_asaccharolytica     | Weighted median           | 31 | 0.1405  | 0.2407 | 0.5594 | -0.0259 | 0.0316 | 0.4184 | 25.8063 | 0.6358 | 3.3989     |
| IschemicStroke | s_Porphyrromonas_asaccharolytica     | Inverse variance weighted | 31 | 0.0670  | 0.1639 | 0.6826 | -0.0259 | 0.0316 | 0.4184 | 25.8063 | 0.6358 | 3.3989     |
| IschemicStroke | s_Porphyrromonas_asaccharolytica     | Simple mode               | 31 | 0.4746  | 0.5143 | 0.3634 | -0.0259 | 0.0316 | 0.4184 | 25.8063 | 0.6358 | 3.3989     |
| IschemicStroke | s_Porphyrromonas_asaccharolytica     | Weighted mode             | 31 | 0.4017  | 0.4070 | 0.3315 | -0.0259 | 0.0316 | 0.4184 | 25.8063 | 0.6358 | 3.3989     |
| IschemicStroke | s_Prevotella_bergensis               | MR Egger                  | 31 | -0.3630 | 0.8256 | 0.6634 | 0.0260  | 0.0591 | 0.6636 | 22.5837 | 0.7952 | 5.0327     |
| IschemicStroke | s_Prevotella_bergensis               | Weighted median           | 31 | -0.3487 | 0.4470 | 0.4354 | 0.0260  | 0.0591 | 0.6636 | 22.5837 | 0.7952 | 5.0327     |
| IschemicStroke | s_Prevotella_bergensis               | Inverse variance weighted | 31 | -0.0262 | 0.3068 | 0.9320 | 0.0260  | 0.0591 | 0.6636 | 22.5837 | 0.7952 | 5.0327     |

|                |                                   |                           |    |         |        |        |         |        |        |         |        |         |
|----------------|-----------------------------------|---------------------------|----|---------|--------|--------|---------|--------|--------|---------|--------|---------|
| IschemicStroke | s_Prevotella_bergensis            | Simple mode               | 31 | 0.9116  | 0.8746 | 0.3056 | 0.0260  | 0.0591 | 0.6636 | 22.5837 | 0.7952 | 5.0327  |
| IschemicStroke | s_Prevotella_bergensis            | Weighted mode             | 31 | -0.4693 | 0.7302 | 0.5253 | 0.0260  | 0.0591 | 0.6636 | 22.5837 | 0.7952 | 5.0327  |
| IschemicStroke | s_Prevotella_bivia                | MR Egger                  | 31 | -1.0842 | 0.6146 | 0.0882 | 0.0725  | 0.0440 | 0.1103 | 29.4777 | 0.4926 | 1.3796  |
| IschemicStroke | s_Prevotella_bivia                | Weighted median           | 31 | -0.4148 | 0.3321 | 0.2116 | 0.0725  | 0.0440 | 0.1103 | 29.4777 | 0.4926 | 1.3796  |
| IschemicStroke | s_Prevotella_bivia                | Inverse variance weighted | 31 | -0.1443 | 0.2284 | 0.5276 | 0.0725  | 0.0440 | 0.1103 | 29.4777 | 0.4926 | 1.3796  |
| IschemicStroke | s_Prevotella_bivia                | Simple mode               | 31 | -0.1330 | 0.6008 | 0.8263 | 0.0725  | 0.0440 | 0.1103 | 29.4777 | 0.4926 | 1.3796  |
| IschemicStroke | s_Prevotella_bivia                | Weighted mode             | 31 | -0.4332 | 0.4836 | 0.3776 | 0.0725  | 0.0440 | 0.1103 | 29.4777 | 0.4926 | 1.3796  |
| IschemicStroke | s_Prevotella_buccae               | MR Egger                  | 31 | -1.0455 | 0.5719 | 0.0778 | 0.0947  | 0.0409 | 0.0281 | 25.9427 | 0.6781 | 1.5293  |
| IschemicStroke | s_Prevotella_buccae               | Weighted median           | 31 | -0.3892 | 0.3031 | 0.1991 | 0.0947  | 0.0409 | 0.0281 | 25.9427 | 0.6781 | 1.5293  |
| IschemicStroke | s_Prevotella_buccae               | Inverse variance weighted | 31 | 0.1820  | 0.2125 | 0.3917 | 0.0947  | 0.0409 | 0.0281 | 25.9427 | 0.6781 | 1.5293  |
| IschemicStroke | s_Prevotella_buccae               | Simple mode               | 31 | -0.4122 | 0.5948 | 0.4936 | 0.0947  | 0.0409 | 0.0281 | 25.9427 | 0.6781 | 1.5293  |
| IschemicStroke | s_Prevotella_buccae               | Weighted mode             | 31 | -0.5052 | 0.4150 | 0.2330 | 0.0947  | 0.0409 | 0.0281 | 25.9427 | 0.6781 | 1.5293  |
| IschemicStroke | s_Prevotella_buccalis             | MR Egger                  | 31 | -0.1561 | 0.5767 | 0.7886 | 0.0105  | 0.0413 | 0.8016 | 43.4105 | 0.0417 | 3.9355  |
| IschemicStroke | s_Prevotella_buccalis             | Weighted median           | 31 | -0.0192 | 0.2575 | 0.9406 | 0.0105  | 0.0413 | 0.8016 | 43.4105 | 0.0417 | 3.9355  |
| IschemicStroke | s_Prevotella_buccalis             | Inverse variance weighted | 31 | -0.0203 | 0.2109 | 0.9234 | 0.0105  | 0.0413 | 0.8016 | 43.4105 | 0.0417 | 3.9355  |
| IschemicStroke | s_Prevotella_buccalis             | Simple mode               | 31 | 0.1934  | 0.4771 | 0.6881 | 0.0105  | 0.0413 | 0.8016 | 43.4105 | 0.0417 | 3.9355  |
| IschemicStroke | s_Prevotella_buccalis             | Weighted mode             | 31 | 0.0860  | 0.3849 | 0.8248 | 0.0105  | 0.0413 | 0.8016 | 43.4105 | 0.0417 | 3.9355  |
| IschemicStroke | s_Prevotella_copri                | MR Egger                  | 31 | 0.0017  | 0.9966 | 0.9986 | 0.0039  | 0.0714 | 0.9565 | 29.5151 | 0.4385 | 39.4887 |
| IschemicStroke | s_Prevotella_copri                | Weighted median           | 31 | 0.0445  | 0.5536 | 0.9360 | 0.0039  | 0.0714 | 0.9565 | 29.5151 | 0.4385 | 39.4887 |
| IschemicStroke | s_Prevotella_copri                | Inverse variance weighted | 31 | 0.0526  | 0.3670 | 0.8861 | 0.0039  | 0.0714 | 0.9565 | 29.5151 | 0.4385 | 39.4887 |
| IschemicStroke | s_Prevotella_copri                | Simple mode               | 31 | 0.2603  | 1.0604 | 0.8077 | 0.0039  | 0.0714 | 0.9565 | 29.5151 | 0.4385 | 39.4887 |
| IschemicStroke | s_Prevotella_copri                | Weighted mode             | 31 | 0.1964  | 0.7817 | 0.8033 | 0.0039  | 0.0714 | 0.9565 | 29.5151 | 0.4385 | 39.4887 |
| IschemicStroke | s_Prevotella_denticola            | MR Egger                  | 31 | -0.9391 | 0.8899 | 0.3000 | 0.0743  | 0.0637 | 0.2532 | 26.0669 | 0.6717 | 18.8603 |
| IschemicStroke | s_Prevotella_denticola            | Weighted median           | 31 | -0.2412 | 0.4792 | 0.6146 | 0.0743  | 0.0637 | 0.2532 | 26.0669 | 0.6717 | 18.8603 |
| IschemicStroke | s_Prevotella_denticola            | Inverse variance weighted | 31 | 0.0241  | 0.3306 | 0.9419 | 0.0743  | 0.0637 | 0.2532 | 26.0669 | 0.6717 | 18.8603 |
| IschemicStroke | s_Prevotella_denticola            | Simple mode               | 31 | -0.5026 | 0.8855 | 0.5746 | 0.0743  | 0.0637 | 0.2532 | 26.0669 | 0.6717 | 18.8603 |
| IschemicStroke | s_Prevotella_denticola            | Weighted mode             | 31 | -0.4234 | 0.6655 | 0.5294 | 0.0743  | 0.0637 | 0.2532 | 26.0669 | 0.6717 | 18.8603 |
| IschemicStroke | s_Prevotella_disiens              | MR Egger                  | 31 | -0.8398 | 0.3730 | 0.0321 | 0.0690  | 0.0267 | 0.0152 | 53.4323 | 0.0053 | 7.7068  |
| IschemicStroke | s_Prevotella_disiens              | Weighted median           | 31 | -0.0012 | 0.1823 | 0.9949 | 0.0690  | 0.0267 | 0.0152 | 53.4323 | 0.0053 | 7.7068  |
| IschemicStroke | s_Prevotella_disiens              | Inverse variance weighted | 31 | 0.0540  | 0.1511 | 0.7211 | 0.0690  | 0.0267 | 0.0152 | 53.4323 | 0.0053 | 7.7068  |
| IschemicStroke | s_Prevotella_disiens              | Simple mode               | 31 | 0.0721  | 0.3837 | 0.8521 | 0.0690  | 0.0267 | 0.0152 | 53.4323 | 0.0053 | 7.7068  |
| IschemicStroke | s_Prevotella_disiens              | Weighted mode             | 31 | 0.0368  | 0.3776 | 0.9229 | 0.0690  | 0.0267 | 0.0152 | 53.4323 | 0.0053 | 7.7068  |
| IschemicStroke | s_Prevotella_oris                 | MR Egger                  | 31 | -0.0814 | 0.2866 | 0.7784 | -0.0010 | 0.0205 | 0.9609 | 28.8613 | 0.4723 | 12.3444 |
| IschemicStroke | s_Prevotella_oris                 | Weighted median           | 31 | -0.1333 | 0.1559 | 0.3928 | -0.0010 | 0.0205 | 0.9609 | 28.8613 | 0.4723 | 12.3444 |
| IschemicStroke | s_Prevotella_oris                 | Inverse variance weighted | 31 | -0.0946 | 0.1065 | 0.3745 | -0.0010 | 0.0205 | 0.9609 | 28.8613 | 0.4723 | 12.3444 |
| IschemicStroke | s_Prevotella_oris                 | Simple mode               | 31 | -0.5518 | 0.3269 | 0.1018 | -0.0010 | 0.0205 | 0.9609 | 28.8613 | 0.4723 | 12.3444 |
| IschemicStroke | s_Prevotella_oris                 | Weighted mode             | 31 | -0.2315 | 0.2242 | 0.3101 | -0.0010 | 0.0205 | 0.9609 | 28.8613 | 0.4723 | 12.3444 |
| IschemicStroke | s_Prevotella_tanneriae            | MR Egger                  | 31 | -0.1538 | 0.5431 | 0.7791 | 0.0214  | 0.0389 | 0.5865 | 43.3556 | 0.0422 | 1.7731  |
| IschemicStroke | s_Prevotella_tanneriae            | Weighted median           | 31 | -0.1334 | 0.2455 | 0.5870 | 0.0214  | 0.0389 | 0.5865 | 43.3556 | 0.0422 | 1.7731  |
| IschemicStroke | s_Prevotella_tanneriae            | Inverse variance weighted | 31 | 0.1236  | 0.1994 | 0.5354 | 0.0214  | 0.0389 | 0.5865 | 43.3556 | 0.0422 | 1.7731  |
| IschemicStroke | s_Prevotella_tanneriae            | Simple mode               | 31 | 0.0793  | 0.5095 | 0.8773 | 0.0214  | 0.0389 | 0.5865 | 43.3556 | 0.0422 | 1.7731  |
| IschemicStroke | s_Prevotella_tanneriae            | Weighted mode             | 31 | -0.2436 | 0.3637 | 0.5081 | 0.0214  | 0.0389 | 0.5865 | 43.3556 | 0.0422 | 1.7731  |
| IschemicStroke | s_Prevotella_timonensis           | MR Egger                  | 31 | -0.0721 | 0.3382 | 0.8328 | 0.0121  | 0.0242 | 0.6208 | 26.8987 | 0.5772 | 8.3635  |
| IschemicStroke | s_Prevotella_timonensis           | Weighted median           | 31 | 0.0505  | 0.1877 | 0.7877 | 0.0121  | 0.0242 | 0.6208 | 26.8987 | 0.5772 | 8.3635  |
| IschemicStroke | s_Prevotella_timonensis           | Inverse variance weighted | 31 | 0.0850  | 0.1257 | 0.4989 | 0.0121  | 0.0242 | 0.6208 | 26.8987 | 0.5772 | 8.3635  |
| IschemicStroke | s_Prevotella_timonensis           | Simple mode               | 31 | 0.0453  | 0.3342 | 0.8931 | 0.0121  | 0.0242 | 0.6208 | 26.8987 | 0.5772 | 8.3635  |
| IschemicStroke | s_Prevotella_timonensis           | Weighted mode             | 31 | -0.0180 | 0.2754 | 0.9484 | 0.0121  | 0.0242 | 0.6208 | 26.8987 | 0.5772 | 8.3635  |
| IschemicStroke | s_Providencia_rettgeri            | MR Egger                  | 31 | -0.0792 | 0.5989 | 0.8957 | -0.0044 | 0.0429 | 0.9198 | 39.2089 | 0.0977 | 2.9969  |
| IschemicStroke | s_Providencia_rettgeri            | Weighted median           | 31 | 0.0363  | 0.2790 | 0.8964 | -0.0044 | 0.0429 | 0.9198 | 39.2089 | 0.0977 | 2.9969  |
| IschemicStroke | s_Providencia_rettgeri            | Inverse variance weighted | 31 | -0.1357 | 0.2188 | 0.5352 | -0.0044 | 0.0429 | 0.9198 | 39.2089 | 0.0977 | 2.9969  |
| IschemicStroke | s_Providencia_rettgeri            | Simple mode               | 31 | 0.0174  | 0.5592 | 0.9754 | -0.0044 | 0.0429 | 0.9198 | 39.2089 | 0.0977 | 2.9969  |
| IschemicStroke | s_Providencia_rettgeri            | Weighted mode             | 31 | -0.0214 | 0.4122 | 0.9590 | -0.0044 | 0.0429 | 0.9198 | 39.2089 | 0.0977 | 2.9969  |
| IschemicStroke | s_Pseudoflavonifractor_capillosus | MR Egger                  | 31 | 0.0447  | 0.2369 | 0.8516 | -0.0052 | 0.0170 | 0.7634 | 23.4039 | 0.7577 | 14.5007 |
| IschemicStroke | s_Pseudoflavonifractor_capillosus | Weighted median           | 31 | 0.0311  | 0.1268 | 0.8061 | -0.0052 | 0.0170 | 0.7634 | 23.4039 | 0.7577 | 14.5007 |
| IschemicStroke | s_Pseudoflavonifractor_capillosus | Inverse variance weighted | 31 | -0.0221 | 0.0880 | 0.8014 | -0.0052 | 0.0170 | 0.7634 | 23.4039 | 0.7577 | 14.5007 |
| IschemicStroke | s_Pseudoflavonifractor_capillosus | Simple mode               | 31 | 0.0682  | 0.2354 | 0.7740 | -0.0052 | 0.0170 | 0.7634 | 23.4039 | 0.7577 | 14.5007 |
| IschemicStroke | s_Pseudoflavonifractor_capillosus | Weighted mode             | 31 | 0.0487  | 0.1720 | 0.7788 | -0.0052 | 0.0170 | 0.7634 | 23.4039 | 0.7577 | 14.5007 |
| IschemicStroke | s_Roseburia_intestinalis          | MR Egger                  | 31 | 0.4890  | 0.4127 | 0.2458 | -0.0174 | 0.0296 | 0.5615 | 19.4862 | 0.9082 | 3.1276  |
| IschemicStroke | s_Roseburia_intestinalis          | Weighted median           | 31 | 0.2027  | 0.2141 | 0.3437 | -0.0174 | 0.0296 | 0.5615 | 19.4862 | 0.9082 | 3.1276  |
| IschemicStroke | s_Roseburia_intestinalis          | Inverse variance weighted | 31 | 0.2639  | 0.1534 | 0.0853 | -0.0174 | 0.0296 | 0.5615 | 19.4862 | 0.9082 | 3.1276  |
| IschemicStroke | s_Roseburia_intestinalis          | Simple mode               | 31 | -0.0365 | 0.3912 | 0.9263 | -0.0174 | 0.0296 | 0.5615 | 19.4862 | 0.9082 | 3.1276  |

|                |                                |                           |    |         |        |        |         |        |        |         |        |         |
|----------------|--------------------------------|---------------------------|----|---------|--------|--------|---------|--------|--------|---------|--------|---------|
| IschemicStroke | s_Roseburia_intestinalis       | Weighted mode             | 31 | 0.0700  | 0.3189 | 0.8277 | -0.0174 | 0.0296 | 0.5615 | 19.4862 | 0.9082 | 3.1276  |
| IschemicStroke | s_Ruminococcus_albus           | MR Egger                  | 31 | 0.5607  | 0.5612 | 0.3261 | -0.0334 | 0.0402 | 0.4124 | 26.2275 | 0.6133 | 1.0113  |
| IschemicStroke | s_Ruminococcus_albus           | Weighted median           | 31 | 0.4774  | 0.3003 | 0.1119 | -0.0334 | 0.0402 | 0.4124 | 26.2275 | 0.6133 | 1.0113  |
| IschemicStroke | s_Ruminococcus_albus           | Inverse variance weighted | 31 | 0.1273  | 0.2085 | 0.5416 | -0.0334 | 0.0402 | 0.4124 | 26.2275 | 0.6133 | 1.0113  |
| IschemicStroke | s_Ruminococcus_albus           | Simple mode               | 31 | 0.6699  | 0.5899 | 0.2651 | -0.0334 | 0.0402 | 0.4124 | 26.2275 | 0.6133 | 1.0113  |
| IschemicStroke | s_Ruminococcus_albus           | Weighted mode             | 31 | 0.6173  | 0.4511 | 0.1814 | -0.0334 | 0.0402 | 0.4124 | 26.2275 | 0.6133 | 1.0113  |
| IschemicStroke | s_Ruminococcus_bromii          | MR Egger                  | 31 | 0.5048  | 0.7690 | 0.5167 | -0.0256 | 0.0551 | 0.6452 | 42.7400 | 0.0481 | 3.6253  |
| IschemicStroke | s_Ruminococcus_bromii          | Weighted median           | 31 | 0.3895  | 0.3566 | 0.2748 | -0.0256 | 0.0551 | 0.6452 | 42.7400 | 0.0481 | 3.6253  |
| IschemicStroke | s_Ruminococcus_bromii          | Inverse variance weighted | 31 | 0.1726  | 0.2819 | 0.5404 | -0.0256 | 0.0551 | 0.6452 | 42.7400 | 0.0481 | 3.6253  |
| IschemicStroke | s_Ruminococcus_bromii          | Simple mode               | 31 | 0.6464  | 0.6409 | 0.3212 | -0.0256 | 0.0551 | 0.6452 | 42.7400 | 0.0481 | 3.6253  |
| IschemicStroke | s_Ruminococcus_bromii          | Weighted mode             | 31 | 0.4768  | 0.5035 | 0.3513 | -0.0256 | 0.0551 | 0.6452 | 42.7400 | 0.0481 | 3.6253  |
| IschemicStroke | s_Ruminococcus_champanellensis | MR Egger                  | 31 | 0.9991  | 0.5898 | 0.1010 | -0.0627 | 0.0422 | 0.1485 | 26.4638 | 0.6513 | 1.4192  |
| IschemicStroke | s_Ruminococcus_champanellensis | Weighted median           | 31 | 0.4730  | 0.3186 | 0.1377 | -0.0627 | 0.0422 | 0.1485 | 26.4638 | 0.6513 | 1.4192  |
| IschemicStroke | s_Ruminococcus_champanellensis | Inverse variance weighted | 31 | 0.1863  | 0.2192 | 0.3953 | -0.0627 | 0.0422 | 0.1485 | 26.4638 | 0.6513 | 1.4192  |
| IschemicStroke | s_Ruminococcus_champanellensis | Simple mode               | 31 | 0.0816  | 0.6407 | 0.8995 | -0.0627 | 0.0422 | 0.1485 | 26.4638 | 0.6513 | 1.4192  |
| IschemicStroke | s_Ruminococcus_champanellensis | Weighted mode             | 31 | 0.5888  | 0.5005 | 0.2487 | -0.0627 | 0.0422 | 0.1485 | 26.4638 | 0.6513 | 1.4192  |
| IschemicStroke | s_Ruminococcus_gnavus          | MR Egger                  | 31 | 0.0364  | 0.3834 | 0.9250 | -0.0032 | 0.0275 | 0.9081 | 30.3991 | 0.3943 | NA      |
| IschemicStroke | s_Ruminococcus_gnavus          | Weighted median           | 31 | 0.0233  | 0.2048 | 0.9094 | -0.0032 | 0.0275 | 0.9081 | 30.3991 | 0.3943 | NA      |
| IschemicStroke | s_Ruminococcus_gnavus          | Inverse variance weighted | 31 | -0.0050 | 0.1401 | 0.9714 | -0.0032 | 0.0275 | 0.9081 | 30.3991 | 0.3943 | NA      |
| IschemicStroke | s_Ruminococcus_gnavus          | Simple mode               | 31 | 0.3932  | 0.4217 | 0.3585 | -0.0032 | 0.0275 | 0.9081 | 30.3991 | 0.3943 | NA      |
| IschemicStroke | s_Ruminococcus_gnavus          | Weighted mode             | 31 | 0.2736  | 0.3046 | 0.3763 | -0.0032 | 0.0275 | 0.9081 | 30.3991 | 0.3943 | NA      |
| IschemicStroke | s_Ruminococcus_lactaris        | MR Egger                  | 31 | 0.0686  | 0.3667 | 0.8528 | 0.0099  | 0.0263 | 0.7083 | 24.6667 | 0.6954 | 9.6705  |
| IschemicStroke | s_Ruminococcus_lactaris        | Weighted median           | 31 | 0.1549  | 0.1935 | 0.4235 | 0.0099  | 0.0263 | 0.7083 | 24.6667 | 0.6954 | 9.6705  |
| IschemicStroke | s_Ruminococcus_lactaris        | Inverse variance weighted | 31 | 0.1973  | 0.1363 | 0.1476 | 0.0099  | 0.0263 | 0.7083 | 24.6667 | 0.6954 | 9.6705  |
| IschemicStroke | s_Ruminococcus_lactaris        | Simple mode               | 31 | 0.0903  | 0.3850 | 0.8161 | 0.0099  | 0.0263 | 0.7083 | 24.6667 | 0.6954 | 9.6705  |
| IschemicStroke | s_Ruminococcus_lactaris        | Weighted mode             | 31 | 0.1377  | 0.3130 | 0.6630 | 0.0099  | 0.0263 | 0.7083 | 24.6667 | 0.6954 | 9.6705  |
| IschemicStroke | s_Ruminococcus_obeum           | MR Egger                  | 31 | 0.4023  | 0.2146 | 0.0710 | -0.0290 | 0.0154 | 0.0693 | 34.1852 | 0.2735 | NA      |
| IschemicStroke | s_Ruminococcus_obeum           | Weighted median           | 31 | 0.0109  | 0.1167 | 0.9256 | -0.0290 | 0.0154 | 0.0693 | 34.1852 | 0.2735 | NA      |
| IschemicStroke | s_Ruminococcus_obeum           | Inverse variance weighted | 31 | 0.0263  | 0.0831 | 0.7517 | -0.0290 | 0.0154 | 0.0693 | 34.1852 | 0.2735 | NA      |
| IschemicStroke | s_Ruminococcus_obeum           | Simple mode               | 31 | -0.2411 | 0.2567 | 0.3551 | -0.0290 | 0.0154 | 0.0693 | 34.1852 | 0.2735 | NA      |
| IschemicStroke | s_Ruminococcus_obeum           | Weighted mode             | 31 | -0.1988 | 0.2144 | 0.3613 | -0.0290 | 0.0154 | 0.0693 | 34.1852 | 0.2735 | NA      |
| IschemicStroke | s_Ruminococcus_torques         | MR Egger                  | 31 | 0.5052  | 0.2497 | 0.0524 | -0.0321 | 0.0179 | 0.0835 | 31.9355 | 0.3705 | NA      |
| IschemicStroke | s_Ruminococcus_torques         | Weighted median           | 31 | 0.1015  | 0.1347 | 0.4512 | -0.0321 | 0.0179 | 0.0835 | 31.9355 | 0.3705 | NA      |
| IschemicStroke | s_Ruminococcus_torques         | Inverse variance weighted | 31 | 0.0896  | 0.0957 | 0.3494 | -0.0321 | 0.0179 | 0.0835 | 31.9355 | 0.3705 | NA      |
| IschemicStroke | s_Ruminococcus_torques         | Simple mode               | 31 | 0.0850  | 0.2761 | 0.7603 | -0.0321 | 0.0179 | 0.0835 | 31.9355 | 0.3705 | NA      |
| IschemicStroke | s_Ruminococcus_torques         | Weighted mode             | 31 | 0.2270  | 0.2047 | 0.2763 | -0.0321 | 0.0179 | 0.0835 | 31.9355 | 0.3705 | NA      |
| IschemicStroke | s_Salmonella_enterica          | MR Egger                  | 31 | -0.1014 | 0.5972 | 0.8664 | 0.0032  | 0.0428 | 0.9413 | 38.5794 | 0.1100 | 3.4315  |
| IschemicStroke | s_Salmonella_enterica          | Weighted median           | 31 | 0.0901  | 0.3025 | 0.7658 | 0.0032  | 0.0428 | 0.9413 | 38.5794 | 0.1100 | 3.4315  |
| IschemicStroke | s_Salmonella_enterica          | Inverse variance weighted | 31 | -0.0602 | 0.2182 | 0.7828 | 0.0032  | 0.0428 | 0.9413 | 38.5794 | 0.1100 | 3.4315  |
| IschemicStroke | s_Salmonella_enterica          | Simple mode               | 31 | 0.0283  | 0.5846 | 0.9618 | 0.0032  | 0.0428 | 0.9413 | 38.5794 | 0.1100 | 3.4315  |
| IschemicStroke | s_Salmonella_enterica          | Weighted mode             | 31 | 0.0639  | 0.4639 | 0.8914 | 0.0032  | 0.0428 | 0.9413 | 38.5794 | 0.1100 | 3.4315  |
| IschemicStroke | s_Streptococcus_anginosus      | MR Egger                  | 31 | -0.5686 | 0.4381 | 0.2046 | 0.0304  | 0.0314 | 0.3403 | 22.1451 | 0.8487 | 2.9373  |
| IschemicStroke | s_Streptococcus_anginosus      | Weighted median           | 31 | -0.1398 | 0.2374 | 0.5561 | 0.0304  | 0.0314 | 0.3403 | 22.1451 | 0.8487 | 2.9373  |
| IschemicStroke | s_Streptococcus_anginosus      | Inverse variance weighted | 31 | -0.1743 | 0.1628 | 0.2844 | 0.0304  | 0.0314 | 0.3403 | 22.1451 | 0.8487 | 2.9373  |
| IschemicStroke | s_Streptococcus_anginosus      | Simple mode               | 31 | 0.1248  | 0.4752 | 0.7947 | 0.0304  | 0.0314 | 0.3403 | 22.1451 | 0.8487 | 2.9373  |
| IschemicStroke | s_Streptococcus_anginosus      | Weighted mode             | 31 | -0.2506 | 0.3704 | 0.5038 | 0.0304  | 0.0314 | 0.3403 | 22.1451 | 0.8487 | 2.9373  |
| IschemicStroke | s_Streptococcus_australis      | MR Egger                  | 31 | -0.2629 | 0.4235 | 0.5396 | 0.0003  | 0.0303 | 0.9910 | 37.7939 | 0.1270 | 3.2578  |
| IschemicStroke | s_Streptococcus_australis      | Weighted median           | 31 | -0.2116 | 0.2253 | 0.3477 | 0.0003  | 0.0303 | 0.9910 | 37.7939 | 0.1270 | 3.2578  |
| IschemicStroke | s_Streptococcus_australis      | Inverse variance weighted | 31 | -0.2584 | 0.1547 | 0.0949 | 0.0003  | 0.0303 | 0.9910 | 37.7939 | 0.1270 | 3.2578  |
| IschemicStroke | s_Streptococcus_australis      | Simple mode               | 31 | -0.1048 | 0.4190 | 0.8042 | 0.0003  | 0.0303 | 0.9910 | 37.7939 | 0.1270 | 3.2578  |
| IschemicStroke | s_Streptococcus_australis      | Weighted mode             | 31 | -0.1165 | 0.3277 | 0.7246 | 0.0003  | 0.0303 | 0.9910 | 37.7939 | 0.1270 | 3.2578  |
| IschemicStroke | s_Streptococcus_dysgalactiae   | MR Egger                  | 31 | 0.2040  | 0.2884 | 0.4850 | -0.0179 | 0.0207 | 0.3927 | 43.1096 | 0.0445 | 10.6932 |
| IschemicStroke | s_Streptococcus_dysgalactiae   | Weighted median           | 31 | -0.0355 | 0.1317 | 0.7876 | -0.0179 | 0.0207 | 0.3927 | 43.1096 | 0.0445 | 10.6932 |
| IschemicStroke | s_Streptococcus_dysgalactiae   | Inverse variance weighted | 31 | -0.0283 | 0.1067 | 0.7906 | -0.0179 | 0.0207 | 0.3927 | 43.1096 | 0.0445 | 10.6932 |
| IschemicStroke | s_Streptococcus_dysgalactiae   | Simple mode               | 31 | -0.1328 | 0.2664 | 0.6218 | -0.0179 | 0.0207 | 0.3927 | 43.1096 | 0.0445 | 10.6932 |
| IschemicStroke | s_Streptococcus_dysgalactiae   | Weighted mode             | 31 | -0.0309 | 0.2037 | 0.8806 | -0.0179 | 0.0207 | 0.3927 | 43.1096 | 0.0445 | 10.6932 |
| IschemicStroke | s_Streptococcus_galloyticus    | MR Egger                  | 31 | -0.6372 | 0.4650 | 0.1811 | 0.0314  | 0.0333 | 0.3542 | 32.8550 | 0.2836 | 1.2471  |
| IschemicStroke | s_Streptococcus_galloyticus    | Weighted median           | 31 | -0.3320 | 0.2335 | 0.1551 | 0.0314  | 0.0333 | 0.3542 | 32.8550 | 0.2836 | 1.2471  |
| IschemicStroke | s_Streptococcus_galloyticus    | Inverse variance weighted | 31 | -0.2308 | 0.1725 | 0.1809 | 0.0314  | 0.0333 | 0.3542 | 32.8550 | 0.2836 | 1.2471  |
| IschemicStroke | s_Streptococcus_galloyticus    | Simple mode               | 31 | -0.5351 | 0.4850 | 0.2787 | 0.0314  | 0.0333 | 0.3542 | 32.8550 | 0.2836 | 1.2471  |
| IschemicStroke | s_Streptococcus_galloyticus    | Weighted mode             | 31 | -0.4639 | 0.3704 | 0.2202 | 0.0314  | 0.0333 | 0.3542 | 32.8550 | 0.2836 | 1.2471  |

|                |                               |                           |    |         |        |        |         |        |        |         |        |          |
|----------------|-------------------------------|---------------------------|----|---------|--------|--------|---------|--------|--------|---------|--------|----------|
| IschemicStroke | s_Streptococcus_gordonii      | MR Egger                  | 31 | -0.2641 | 0.3764 | 0.4885 | -0.0062 | 0.0270 | 0.8208 | 23.0729 | 0.7732 | 2.9934   |
| IschemicStroke | s_Streptococcus_gordonii      | Weighted median           | 31 | -0.1509 | 0.2050 | 0.4617 | -0.0062 | 0.0270 | 0.8208 | 23.0729 | 0.7732 | 2.9934   |
| IschemicStroke | s_Streptococcus_gordonii      | Inverse variance weighted | 31 | -0.3440 | 0.1399 | 0.0139 | -0.0062 | 0.0270 | 0.8208 | 23.0729 | 0.7732 | 2.9934   |
| IschemicStroke | s_Streptococcus_gordonii      | Simple mode               | 31 | -0.3274 | 0.4093 | 0.4299 | -0.0062 | 0.0270 | 0.8208 | 23.0729 | 0.7732 | 2.9934   |
| IschemicStroke | s_Streptococcus_gordonii      | Weighted mode             | 31 | -0.0651 | 0.2854 | 0.8211 | -0.0062 | 0.0270 | 0.8208 | 23.0729 | 0.7732 | 2.9934   |
| IschemicStroke | s_Streptococcus_infantarius   | MR Egger                  | 31 | -0.6710 | 0.5728 | 0.2510 | 0.0241  | 0.0410 | 0.5623 | 29.2948 | 0.4498 | 195.6797 |
| IschemicStroke | s_Streptococcus_infantarius   | Weighted median           | 31 | -0.3671 | 0.3102 | 0.2367 | 0.0241  | 0.0410 | 0.5623 | 29.2948 | 0.4498 | 195.6797 |
| IschemicStroke | s_Streptococcus_infantarius   | Inverse variance weighted | 31 | -0.3592 | 0.2119 | 0.0900 | 0.0241  | 0.0410 | 0.5623 | 29.2948 | 0.4498 | 195.6797 |
| IschemicStroke | s_Streptococcus_infantarius   | Simple mode               | 31 | -0.1980 | 0.6300 | 0.7554 | 0.0241  | 0.0410 | 0.5623 | 29.2948 | 0.4498 | 195.6797 |
| IschemicStroke | s_Streptococcus_infantarius   | Weighted mode             | 31 | -0.4128 | 0.6528 | 0.5319 | 0.0241  | 0.0410 | 0.5623 | 29.2948 | 0.4498 | 195.6797 |
| IschemicStroke | s_Streptococcus_infantis      | MR Egger                  | 31 | -0.3843 | 0.3110 | 0.2264 | 0.0138  | 0.0223 | 0.5417 | 23.5707 | 0.7498 | 10.1283  |
| IschemicStroke | s_Streptococcus_infantis      | Weighted median           | 31 | -0.1910 | 0.1647 | 0.2462 | 0.0138  | 0.0223 | 0.5417 | 23.5707 | 0.7498 | 10.1283  |
| IschemicStroke | s_Streptococcus_infantis      | Inverse variance weighted | 31 | -0.2060 | 0.1155 | 0.0746 | 0.0138  | 0.0223 | 0.5417 | 23.5707 | 0.7498 | 10.1283  |
| IschemicStroke | s_Streptococcus_infantis      | Simple mode               | 31 | -0.3043 | 0.2797 | 0.2853 | 0.0138  | 0.0223 | 0.5417 | 23.5707 | 0.7498 | 10.1283  |
| IschemicStroke | s_Streptococcus_infantis      | Weighted mode             | 31 | -0.2035 | 0.2317 | 0.3867 | 0.0138  | 0.0223 | 0.5417 | 23.5707 | 0.7498 | 10.1283  |
| IschemicStroke | s_Streptococcus_mitis         | MR Egger                  | 31 | -0.2125 | 0.3175 | 0.5086 | 0.0071  | 0.0227 | 0.7562 | 26.1457 | 0.6177 | 5.6631   |
| IschemicStroke | s_Streptococcus_mitis         | Weighted median           | 31 | 0.0668  | 0.1724 | 0.6986 | 0.0071  | 0.0227 | 0.7562 | 26.1457 | 0.6177 | 5.6631   |
| IschemicStroke | s_Streptococcus_mitis         | Inverse variance weighted | 31 | -0.1202 | 0.1180 | 0.3085 | 0.0071  | 0.0227 | 0.7562 | 26.1457 | 0.6177 | 5.6631   |
| IschemicStroke | s_Streptococcus_mitis         | Simple mode               | 31 | 0.1221  | 0.3091 | 0.6955 | 0.0071  | 0.0227 | 0.7562 | 26.1457 | 0.6177 | 5.6631   |
| IschemicStroke | s_Streptococcus_mitis         | Weighted mode             | 31 | 0.0747  | 0.2416 | 0.7593 | 0.0071  | 0.0227 | 0.7562 | 26.1457 | 0.6177 | 5.6631   |
| IschemicStroke | s_Streptococcus_mutans        | MR Egger                  | 31 | -0.4962 | 0.3493 | 0.1661 | 0.0089  | 0.0250 | 0.7254 | 21.0910 | 0.8558 | 3.2250   |
| IschemicStroke | s_Streptococcus_mutans        | Weighted median           | 31 | -0.2350 | 0.1890 | 0.2137 | 0.0089  | 0.0250 | 0.7254 | 21.0910 | 0.8558 | 3.2250   |
| IschemicStroke | s_Streptococcus_mutans        | Inverse variance weighted | 31 | -0.3812 | 0.1298 | 0.0033 | 0.0089  | 0.0250 | 0.7254 | 21.0910 | 0.8558 | 3.2250   |
| IschemicStroke | s_Streptococcus_mutans        | Simple mode               | 31 | -0.2628 | 0.3383 | 0.4434 | 0.0089  | 0.0250 | 0.7254 | 21.0910 | 0.8558 | 3.2250   |
| IschemicStroke | s_Streptococcus_mutans        | Weighted mode             | 31 | -0.2039 | 0.2745 | 0.4633 | 0.0089  | 0.0250 | 0.7254 | 21.0910 | 0.8558 | 3.2250   |
| IschemicStroke | s_Streptococcus_oralis        | MR Egger                  | 31 | -0.1437 | 0.3622 | 0.6944 | -0.0022 | 0.0259 | 0.9322 | 29.6762 | 0.4303 | 5.0576   |
| IschemicStroke | s_Streptococcus_oralis        | Weighted median           | 31 | -0.1361 | 0.2010 | 0.4985 | -0.0022 | 0.0259 | 0.9322 | 29.6762 | 0.4303 | 5.0576   |
| IschemicStroke | s_Streptococcus_oralis        | Inverse variance weighted | 31 | -0.1726 | 0.1330 | 0.1945 | -0.0022 | 0.0259 | 0.9322 | 29.6762 | 0.4303 | 5.0576   |
| IschemicStroke | s_Streptococcus_oralis        | Simple mode               | 31 | -0.6027 | 0.4170 | 0.1587 | -0.0022 | 0.0259 | 0.9322 | 29.6762 | 0.4303 | 5.0576   |
| IschemicStroke | s_Streptococcus_oralis        | Weighted mode             | 31 | 0.0030  | 0.2893 | 0.9917 | -0.0022 | 0.0259 | 0.9322 | 29.6762 | 0.4303 | 5.0576   |
| IschemicStroke | s_Streptococcus_parasanguinis | MR Egger                  | 31 | -0.4250 | 0.4401 | 0.3421 | -0.0024 | 0.0315 | 0.9402 | 22.2912 | 0.8079 | 1.8561   |
| IschemicStroke | s_Streptococcus_parasanguinis | Weighted median           | 31 | -0.3063 | 0.2456 | 0.2123 | -0.0024 | 0.0315 | 0.9402 | 22.2912 | 0.8079 | 1.8561   |
| IschemicStroke | s_Streptococcus_parasanguinis | Inverse variance weighted | 31 | -0.4560 | 0.1635 | 0.0053 | -0.0024 | 0.0315 | 0.9402 | 22.2912 | 0.8079 | 1.8561   |
| IschemicStroke | s_Streptococcus_parasanguinis | Simple mode               | 31 | -0.2041 | 0.4599 | 0.6603 | -0.0024 | 0.0315 | 0.9402 | 22.2912 | 0.8079 | 1.8561   |
| IschemicStroke | s_Streptococcus_parasanguinis | Weighted mode             | 31 | -0.2480 | 0.3543 | 0.4894 | -0.0024 | 0.0315 | 0.9402 | 22.2912 | 0.8079 | 1.8561   |
| IschemicStroke | s_Streptococcus_pneumoniae    | MR Egger                  | 31 | -0.3646 | 0.3114 | 0.2512 | 0.0124  | 0.0223 | 0.5833 | 28.7488 | 0.4782 | 2.5841   |
| IschemicStroke | s_Streptococcus_pneumoniae    | Weighted median           | 31 | 0.0058  | 0.1724 | 0.9733 | 0.0124  | 0.0223 | 0.5833 | 28.7488 | 0.4782 | 2.5841   |
| IschemicStroke | s_Streptococcus_pneumoniae    | Inverse variance weighted | 31 | -0.2042 | 0.1157 | 0.0776 | 0.0124  | 0.0223 | 0.5833 | 28.7488 | 0.4782 | 2.5841   |
| IschemicStroke | s_Streptococcus_pneumoniae    | Simple mode               | 31 | 0.0117  | 0.2952 | 0.9685 | 0.0124  | 0.0223 | 0.5833 | 28.7488 | 0.4782 | 2.5841   |
| IschemicStroke | s_Streptococcus_pneumoniae    | Weighted mode             | 31 | 0.0023  | 0.2246 | 0.9919 | 0.0124  | 0.0223 | 0.5833 | 28.7488 | 0.4782 | 2.5841   |
| IschemicStroke | s_Streptococcus_pyogenes      | MR Egger                  | 31 | 0.3815  | 0.6153 | 0.5401 | -0.0223 | 0.0441 | 0.6162 | 26.5087 | 0.5982 | 1.2800   |
| IschemicStroke | s_Streptococcus_pyogenes      | Weighted median           | 31 | -0.2210 | 0.3169 | 0.4854 | -0.0223 | 0.0441 | 0.6162 | 26.5087 | 0.5982 | 1.2800   |
| IschemicStroke | s_Streptococcus_pyogenes      | Inverse variance weighted | 31 | 0.0921  | 0.2286 | 0.6872 | -0.0223 | 0.0441 | 0.6162 | 26.5087 | 0.5982 | 1.2800   |
| IschemicStroke | s_Streptococcus_pyogenes      | Simple mode               | 31 | -0.5188 | 0.5980 | 0.3925 | -0.0223 | 0.0441 | 0.6162 | 26.5087 | 0.5982 | 1.2800   |
| IschemicStroke | s_Streptococcus_pyogenes      | Weighted mode             | 31 | -0.2369 | 0.4926 | 0.6341 | -0.0223 | 0.0441 | 0.6162 | 26.5087 | 0.5982 | 1.2800   |
| IschemicStroke | s_Streptococcus_salivarius    | MR Egger                  | 31 | -0.5512 | 0.4144 | 0.1938 | 0.0107  | 0.0297 | 0.7206 | 27.9355 | 0.5214 | 1.0153   |
| IschemicStroke | s_Streptococcus_salivarius    | Weighted median           | 31 | -0.4571 | 0.2279 | 0.0448 | 0.0107  | 0.0297 | 0.7206 | 27.9355 | 0.5214 | 1.0153   |
| IschemicStroke | s_Streptococcus_salivarius    | Inverse variance weighted | 31 | -0.4122 | 0.1540 | 0.0074 | 0.0107  | 0.0297 | 0.7206 | 27.9355 | 0.5214 | 1.0153   |
| IschemicStroke | s_Streptococcus_salivarius    | Simple mode               | 31 | -0.1810 | 0.4372 | 0.6818 | 0.0107  | 0.0297 | 0.7206 | 27.9355 | 0.5214 | 1.0153   |
| IschemicStroke | s_Streptococcus_salivarius    | Weighted mode             | 31 | -0.2945 | 0.3695 | 0.4317 | 0.0107  | 0.0297 | 0.7206 | 27.9355 | 0.5214 | 1.0153   |
| IschemicStroke | s_Streptococcus_sanguinis     | MR Egger                  | 31 | 0.1019  | 0.3679 | 0.7839 | -0.0310 | 0.0263 | 0.2485 | 23.4710 | 0.7954 | 6.7833   |
| IschemicStroke | s_Streptococcus_sanguinis     | Weighted median           | 31 | -0.2499 | 0.2036 | 0.2196 | -0.0310 | 0.0263 | 0.2485 | 23.4710 | 0.7954 | 6.7833   |
| IschemicStroke | s_Streptococcus_sanguinis     | Inverse variance weighted | 31 | -0.3004 | 0.1367 | 0.0280 | -0.0310 | 0.0263 | 0.2485 | 23.4710 | 0.7954 | 6.7833   |
| IschemicStroke | s_Streptococcus_sanguinis     | Simple mode               | 31 | -0.4435 | 0.3589 | 0.2261 | -0.0310 | 0.0263 | 0.2485 | 23.4710 | 0.7954 | 6.7833   |
| IschemicStroke | s_Streptococcus_sanguinis     | Weighted mode             | 31 | -0.2140 | 0.2820 | 0.4538 | -0.0310 | 0.0263 | 0.2485 | 23.4710 | 0.7954 | 6.7833   |
| IschemicStroke | s_Streptococcus_suis          | MR Egger                  | 31 | 0.6950  | 0.5656 | 0.2290 | -0.0324 | 0.0405 | 0.4300 | 38.0099 | 0.1221 | 1.4847   |
| IschemicStroke | s_Streptococcus_suis          | Weighted median           | 31 | 0.0753  | 0.2905 | 0.7954 | -0.0324 | 0.0405 | 0.4300 | 38.0099 | 0.1221 | 1.4847   |
| IschemicStroke | s_Streptococcus_suis          | Inverse variance weighted | 31 | 0.2747  | 0.2089 | 0.1885 | -0.0324 | 0.0405 | 0.4300 | 38.0099 | 0.1221 | 1.4847   |
| IschemicStroke | s_Streptococcus_suis          | Simple mode               | 31 | -0.1504 | 0.5903 | 0.8006 | -0.0324 | 0.0405 | 0.4300 | 38.0099 | 0.1221 | 1.4847   |
| IschemicStroke | s_Streptococcus_suis          | Weighted mode             | 31 | -0.0557 | 0.4539 | 0.9031 | -0.0324 | 0.0405 | 0.4300 | 38.0099 | 0.1221 | 1.4847   |
| IschemicStroke | s_Streptococcus_vestibularis  | MR Egger                  | 31 | -0.7408 | 0.4120 | 0.0826 | 0.0216  | 0.0295 | 0.4707 | 29.4956 | 0.4395 | 2.2699   |

|                |                                                  |                           |    |         |        |        |         |        |        |         |        |          |
|----------------|--------------------------------------------------|---------------------------|----|---------|--------|--------|---------|--------|--------|---------|--------|----------|
| IschemicStroke | s_Streptococcus_vestibularis                     | Weighted median           | 31 | -0.4172 | 0.2334 | 0.0739 | 0.0216  | 0.0295 | 0.4707 | 29.4956 | 0.4395 | 2.2699   |
| IschemicStroke | s_Streptococcus_vestibularis                     | Inverse variance weighted | 31 | -0.4612 | 0.1519 | 0.0024 | 0.0216  | 0.0295 | 0.4707 | 29.4956 | 0.4395 | 2.2699   |
| IschemicStroke | s_Streptococcus_vestibularis                     | Simple mode               | 31 | -0.1838 | 0.4499 | 0.6857 | 0.0216  | 0.0295 | 0.4707 | 29.4956 | 0.4395 | 2.2699   |
| IschemicStroke | s_Streptococcus_vestibularis                     | Weighted mode             | 31 | -0.2635 | 0.3471 | 0.4537 | 0.0216  | 0.0295 | 0.4707 | 29.4956 | 0.4395 | 2.2699   |
| IschemicStroke | s_Tannerella_forsythia                           | MR Egger                  | 31 | 0.5241  | 0.5528 | 0.3510 | -0.0310 | 0.0396 | 0.4398 | 39.4776 | 0.0928 | 1.3902   |
| IschemicStroke | s_Tannerella_forsythia                           | Weighted median           | 31 | 0.1303  | 0.2513 | 0.6041 | -0.0310 | 0.0396 | 0.4398 | 39.4776 | 0.0928 | 1.3902   |
| IschemicStroke | s_Tannerella_forsythia                           | Inverse variance weighted | 31 | 0.1221  | 0.2041 | 0.5498 | -0.0310 | 0.0396 | 0.4398 | 39.4776 | 0.0928 | 1.3902   |
| IschemicStroke | s_Tannerella_forsythia                           | Simple mode               | 31 | -0.1738 | 0.4733 | 0.7160 | -0.0310 | 0.0396 | 0.4398 | 39.4776 | 0.0928 | 1.3902   |
| IschemicStroke | s_Tannerella_forsythia                           | Weighted mode             | 31 | 0.1960  | 0.3829 | 0.6125 | -0.0310 | 0.0396 | 0.4398 | 39.4776 | 0.0928 | 1.3902   |
| IschemicStroke | s_Treponema_denticola                            | MR Egger                  | 31 | 0.6654  | 0.3167 | 0.0444 | -0.0436 | 0.0227 | 0.0645 | 34.2134 | 0.2724 | 5.5148   |
| IschemicStroke | s_Treponema_denticola                            | Weighted median           | 31 | 0.1401  | 0.1766 | 0.4275 | -0.0436 | 0.0227 | 0.0645 | 34.2134 | 0.2724 | 5.5148   |
| IschemicStroke | s_Treponema_denticola                            | Inverse variance weighted | 31 | 0.1003  | 0.1229 | 0.4144 | -0.0436 | 0.0227 | 0.0645 | 34.2134 | 0.2724 | 5.5148   |
| IschemicStroke | s_Treponema_denticola                            | Simple mode               | 31 | -0.0296 | 0.3593 | 0.9350 | -0.0436 | 0.0227 | 0.0645 | 34.2134 | 0.2724 | 5.5148   |
| IschemicStroke | s_Treponema_denticola                            | Weighted mode             | 31 | 0.2511  | 0.3296 | 0.4521 | -0.0436 | 0.0227 | 0.0645 | 34.2134 | 0.2724 | 5.5148   |
| IschemicStroke | s_Treponema_vincentii                            | MR Egger                  | 31 | 0.4575  | 0.3110 | 0.1521 | -0.0270 | 0.0223 | 0.2354 | 36.9687 | 0.1781 | 10.5466  |
| IschemicStroke | s_Treponema_vincentii                            | Weighted median           | 31 | 0.2878  | 0.1571 | 0.0670 | -0.0270 | 0.0223 | 0.2354 | 36.9687 | 0.1781 | 10.5466  |
| IschemicStroke | s_Treponema_vincentii                            | Inverse variance weighted | 31 | 0.1076  | 0.1165 | 0.3558 | -0.0270 | 0.0223 | 0.2354 | 36.9687 | 0.1781 | 10.5466  |
| IschemicStroke | s_Treponema_vincentii                            | Simple mode               | 31 | 0.2755  | 0.3129 | 0.3857 | -0.0270 | 0.0223 | 0.2354 | 36.9687 | 0.1781 | 10.5466  |
| IschemicStroke | s_Treponema_vincentii                            | Weighted mode             | 31 | 0.3330  | 0.2309 | 0.1597 | -0.0270 | 0.0223 | 0.2354 | 36.9687 | 0.1781 | 10.5466  |
| IschemicStroke | s_Veillonella_atypica                            | MR Egger                  | 31 | -0.9336 | 0.5435 | 0.0965 | 0.0183  | 0.0389 | 0.6419 | 17.7745 | 0.9487 | 1.3388   |
| IschemicStroke | s_Veillonella_atypica                            | Weighted median           | 31 | -0.9083 | 0.2898 | 0.0017 | 0.0183  | 0.0389 | 0.6419 | 17.7745 | 0.9487 | 1.3388   |
| IschemicStroke | s_Veillonella_atypica                            | Inverse variance weighted | 31 | -0.6965 | 0.2020 | 0.0006 | 0.0183  | 0.0389 | 0.6419 | 17.7745 | 0.9487 | 1.3388   |
| IschemicStroke | s_Veillonella_atypica                            | Simple mode               | 31 | -1.1084 | 0.4535 | 0.0206 | 0.0183  | 0.0389 | 0.6419 | 17.7745 | 0.9487 | 1.3388   |
| IschemicStroke | s_Veillonella_atypica                            | Weighted mode             | 31 | -0.8618 | 0.4278 | 0.0530 | 0.0183  | 0.0389 | 0.6419 | 17.7745 | 0.9487 | 1.3388   |
| IschemicStroke | s_Veillonella_dispar                             | MR Egger                  | 31 | -1.0882 | 0.5474 | 0.0563 | 0.0290  | 0.0392 | 0.4657 | 20.9085 | 0.8625 | 1.1552   |
| IschemicStroke | s_Veillonella_dispar                             | Weighted median           | 31 | -0.6330 | 0.2899 | 0.0290 | 0.0290  | 0.0392 | 0.4657 | 20.9085 | 0.8625 | 1.1552   |
| IschemicStroke | s_Veillonella_dispar                             | Inverse variance weighted | 31 | -0.7125 | 0.2034 | 0.0005 | 0.0290  | 0.0392 | 0.4657 | 20.9085 | 0.8625 | 1.1552   |
| IschemicStroke | s_Veillonella_dispar                             | Simple mode               | 31 | -0.4472 | 0.6027 | 0.4639 | 0.0290  | 0.0392 | 0.4657 | 20.9085 | 0.8625 | 1.1552   |
| IschemicStroke | s_Veillonella_dispar                             | Weighted mode             | 31 | -0.4057 | 0.5311 | 0.4509 | 0.0290  | 0.0392 | 0.4657 | 20.9085 | 0.8625 | 1.1552   |
| IschemicStroke | s_Veillonella_parvula                            | MR Egger                  | 31 | -0.7561 | 0.4909 | 0.1343 | 0.0184  | 0.0352 | 0.6050 | 18.6862 | 0.9291 | 1.5999   |
| IschemicStroke | s_Veillonella_parvula                            | Weighted median           | 31 | -0.5567 | 0.2678 | 0.0376 | 0.0184  | 0.0352 | 0.6050 | 18.6862 | 0.9291 | 1.5999   |
| IschemicStroke | s_Veillonella_parvula                            | Inverse variance weighted | 31 | -0.5178 | 0.1824 | 0.0045 | 0.0184  | 0.0352 | 0.6050 | 18.6862 | 0.9291 | 1.5999   |
| IschemicStroke | s_Veillonella_parvula                            | Simple mode               | 31 | -0.6986 | 0.4765 | 0.1531 | 0.0184  | 0.0352 | 0.6050 | 18.6862 | 0.9291 | 1.5999   |
| IschemicStroke | s_Veillonella_parvula                            | Weighted mode             | 31 | -0.6340 | 0.3835 | 0.1087 | 0.0184  | 0.0352 | 0.6050 | 18.6862 | 0.9291 | 1.5999   |
| IschemicStroke | s_butyrate-producing_bacterium                   | MR Egger                  | 31 | 0.7654  | 0.4161 | 0.0761 | -0.0453 | 0.0298 | 0.1391 | 30.9487 | 0.4179 | 3.7822   |
| IschemicStroke | s_butyrate-producing_bacterium                   | Weighted median           | 31 | 0.3723  | 0.2254 | 0.0986 | -0.0453 | 0.0298 | 0.1391 | 30.9487 | 0.4179 | 3.7822   |
| IschemicStroke | s_butyrate-producing_bacterium                   | Inverse variance weighted | 31 | 0.1779  | 0.1571 | 0.2575 | -0.0453 | 0.0298 | 0.1391 | 30.9487 | 0.4179 | 3.7822   |
| IschemicStroke | s_butyrate-producing_bacterium                   | Simple mode               | 31 | 0.4687  | 0.4224 | 0.2759 | -0.0453 | 0.0298 | 0.1391 | 30.9487 | 0.4179 | 3.7822   |
| IschemicStroke | s_butyrate-producing_bacterium                   | Weighted mode             | 31 | 0.5024  | 0.3938 | 0.2119 | -0.0453 | 0.0298 | 0.1391 | 30.9487 | 0.4179 | 3.7822   |
| IschemicStroke | s_unclassified_Citrobacter_sp._30_2              | MR Egger                  | 31 | -0.0626 | 0.6965 | 0.9290 | 0.0077  | 0.0499 | 0.8783 | 36.7078 | 0.1538 | 479.4405 |
| IschemicStroke | s_unclassified_Citrobacter_sp._30_2              | Weighted median           | 31 | 0.3196  | 0.3569 | 0.3705 | 0.0077  | 0.0499 | 0.8783 | 36.7078 | 0.1538 | 479.4405 |
| IschemicStroke | s_unclassified_Citrobacter_sp._30_2              | Inverse variance weighted | 31 | 0.0373  | 0.2546 | 0.8834 | 0.0077  | 0.0499 | 0.8783 | 36.7078 | 0.1538 | 479.4405 |
| IschemicStroke | s_unclassified_Citrobacter_sp._30_2              | Simple mode               | 31 | 0.2641  | 0.6577 | 0.6908 | 0.0077  | 0.0499 | 0.8783 | 36.7078 | 0.1538 | 479.4405 |
| IschemicStroke | s_unclassified_Citrobacter_sp._30_2              | Weighted mode             | 31 | 0.3068  | 0.4728 | 0.5213 | 0.0077  | 0.0499 | 0.8783 | 36.7078 | 0.1538 | 479.4405 |
| IschemicStroke | s_unclassified_Clostridiales_bacterium_1_7_47FAA | MR Egger                  | 31 | -0.0736 | 0.2550 | 0.7748 | 0.0046  | 0.0183 | 0.8009 | 29.4637 | 0.4411 | 16.2482  |
| IschemicStroke | s_unclassified_Clostridiales_bacterium_1_7_47FAA | Weighted median           | 31 | -0.0163 | 0.1461 | 0.9110 | 0.0046  | 0.0183 | 0.8009 | 29.4637 | 0.4411 | 16.2482  |
| IschemicStroke | s_unclassified_Clostridiales_bacterium_1_7_47FAA | Inverse variance weighted | 31 | -0.0134 | 0.0940 | 0.8869 | 0.0046  | 0.0183 | 0.8009 | 29.4637 | 0.4411 | 16.2482  |
| IschemicStroke | s_unclassified_Clostridiales_bacterium_1_7_47FAA | Simple mode               | 31 | 0.0448  | 0.2578 | 0.8632 | 0.0046  | 0.0183 | 0.8009 | 29.4637 | 0.4411 | 16.2482  |
| IschemicStroke | s_unclassified_Clostridiales_bacterium_1_7_47FAA | Weighted mode             | 31 | -0.0027 | 0.2081 | 0.9897 | 0.0046  | 0.0183 | 0.8009 | 29.4637 | 0.4411 | 16.2482  |
| IschemicStroke | s_unclassified_Clostridium_sp._D5                | MR Egger                  | 31 | -0.0721 | 0.2862 | 0.8029 | 0.0124  | 0.0205 | 0.5494 | 27.2213 | 0.5598 | 10.0368  |
| IschemicStroke | s_unclassified_Clostridium_sp._D5                | Weighted median           | 31 | 0.1209  | 0.1654 | 0.4646 | 0.0124  | 0.0205 | 0.5494 | 27.2213 | 0.5598 | 10.0368  |
| IschemicStroke | s_unclassified_Clostridium_sp._D5                | Inverse variance weighted | 31 | 0.0889  | 0.1064 | 0.4034 | 0.0124  | 0.0205 | 0.5494 | 27.2213 | 0.5598 | 10.0368  |
| IschemicStroke | s_unclassified_Clostridium_sp._D5                | Simple mode               | 31 | 0.2875  | 0.3029 | 0.3503 | 0.0124  | 0.0205 | 0.5494 | 27.2213 | 0.5598 | 10.0368  |
| IschemicStroke | s_unclassified_Clostridium_sp._D5                | Weighted mode             | 31 | 0.1995  | 0.2447 | 0.4212 | 0.0124  | 0.0205 | 0.5494 | 27.2213 | 0.5598 | 10.0368  |
| IschemicStroke | s_unclassified_Clostridium_sp._HGF2              | MR Egger                  | 31 | 0.1717  | 0.3595 | 0.6364 | -0.0103 | 0.0257 | 0.6911 | 21.3226 | 0.8471 | 15.7572  |
| IschemicStroke | s_unclassified_Clostridium_sp._HGF2              | Weighted median           | 31 | 0.1241  | 0.1931 | 0.5205 | -0.0103 | 0.0257 | 0.6911 | 21.3226 | 0.8471 | 15.7572  |
| IschemicStroke | s_unclassified_Clostridium_sp._HGF2              | Inverse variance weighted | 31 | 0.0378  | 0.1336 | 0.7773 | -0.0103 | 0.0257 | 0.6911 | 21.3226 | 0.8471 | 15.7572  |
| IschemicStroke | s_unclassified_Clostridium_sp._HGF2              | Simple mode               | 31 | 0.1778  | 0.3402 | 0.6051 | -0.0103 | 0.0257 | 0.6911 | 21.3226 | 0.8471 | 15.7572  |
| IschemicStroke | s_unclassified_Clostridium_sp._HGF2              | Weighted mode             | 31 | 0.1597  | 0.2614 | 0.5458 | -0.0103 | 0.0257 | 0.6911 | 21.3226 | 0.8471 | 15.7572  |
| IschemicStroke | s_unclassified_Clostridium_sp._I2-50             | MR Egger                  | 31 | -0.3438 | 0.3432 | 0.3248 | 0.0334  | 0.0246 | 0.1840 | 26.6987 | 0.6390 | 7.9425   |
| IschemicStroke | s_unclassified_Clostridium_sp._I2-50             | Weighted median           | 31 | 0.0505  | 0.1788 | 0.7777 | 0.0334  | 0.0246 | 0.1840 | 26.6987 | 0.6390 | 7.9425   |

|                |                                                        |                           |    |         |        |        |         |        |        |         |        |         |
|----------------|--------------------------------------------------------|---------------------------|----|---------|--------|--------|---------|--------|--------|---------|--------|---------|
| IschemicStroke | s_unclassified_Clostridium_sp._L2-50                   | Inverse variance weighted | 31 | 0.0899  | 0.1275 | 0.4808 | 0.0334  | 0.0246 | 0.1840 | 26.6987 | 0.6390 | 7.9425  |
| IschemicStroke | s_unclassified_Clostridium_sp._L2-50                   | Simple mode               | 31 | 0.1358  | 0.3686 | 0.7152 | 0.0334  | 0.0246 | 0.1840 | 26.6987 | 0.6390 | 7.9425  |
| IschemicStroke | s_unclassified_Clostridium_sp._L2-50                   | Weighted mode             | 31 | -0.0936 | 0.2714 | 0.7326 | 0.0334  | 0.0246 | 0.1840 | 26.6987 | 0.6390 | 7.9425  |
| IschemicStroke | s_unclassified_Clostridium_sp._SY8519                  | MR Egger                  | 31 | 0.4654  | 0.3984 | 0.2523 | -0.0296 | 0.0285 | 0.3083 | 30.8650 | 0.4221 | 1.7412  |
| IschemicStroke | s_unclassified_Clostridium_sp._SY8519                  | Weighted median           | 31 | 0.3191  | 0.2158 | 0.1392 | -0.0296 | 0.0285 | 0.3083 | 30.8650 | 0.4221 | 1.7412  |
| IschemicStroke | s_unclassified_Clostridium_sp._SY8519                  | Inverse variance weighted | 31 | 0.0817  | 0.1482 | 0.5814 | -0.0296 | 0.0285 | 0.3083 | 30.8650 | 0.4221 | 1.7412  |
| IschemicStroke | s_unclassified_Clostridium_sp._SY8519                  | Simple mode               | 31 | 0.2966  | 0.4459 | 0.5110 | -0.0296 | 0.0285 | 0.3083 | 30.8650 | 0.4221 | 1.7412  |
| IschemicStroke | s_unclassified_Clostridium_sp._SY8519                  | Weighted mode             | 31 | 0.4332  | 0.3218 | 0.1883 | -0.0296 | 0.0285 | 0.3083 | 30.8650 | 0.4221 | 1.7412  |
| IschemicStroke | s_unclassified_Coprobacillus_sp._29_1                  | MR Egger                  | 31 | 0.2828  | 0.3302 | 0.3987 | -0.0101 | 0.0236 | 0.6726 | 20.8874 | 0.8632 | 7.8958  |
| IschemicStroke | s_unclassified_Coprobacillus_sp._29_1                  | Weighted median           | 31 | 0.2571  | 0.1696 | 0.1296 | -0.0101 | 0.0236 | 0.6726 | 20.8874 | 0.8632 | 7.8958  |
| IschemicStroke | s_unclassified_Coprobacillus_sp._29_1                  | Inverse variance weighted | 31 | 0.1520  | 0.1227 | 0.2155 | -0.0101 | 0.0236 | 0.6726 | 20.8874 | 0.8632 | 7.8958  |
| IschemicStroke | s_unclassified_Coprobacillus_sp._29_1                  | Simple mode               | 31 | 0.2781  | 0.3453 | 0.4269 | -0.0101 | 0.0236 | 0.6726 | 20.8874 | 0.8632 | 7.8958  |
| IschemicStroke | s_unclassified_Coprobacillus_sp._29_1                  | Weighted mode             | 31 | 0.3307  | 0.2657 | 0.2229 | -0.0101 | 0.0236 | 0.6726 | 20.8874 | 0.8632 | 7.8958  |
| IschemicStroke | s_unclassified_Desulfovibrio_sp._3_1_syn3              | MR Egger                  | 31 | 1.0360  | 0.5928 | 0.0911 | -0.0653 | 0.0424 | 0.1339 | 26.9079 | 0.6281 | 5.4750  |
| IschemicStroke | s_unclassified_Desulfovibrio_sp._3_1_syn3              | Weighted median           | 31 | -0.1117 | 0.3335 | 0.7377 | -0.0653 | 0.0424 | 0.1339 | 26.9079 | 0.6281 | 5.4750  |
| IschemicStroke | s_unclassified_Desulfovibrio_sp._3_1_syn3              | Inverse variance weighted | 31 | 0.1865  | 0.2190 | 0.3944 | -0.0653 | 0.0424 | 0.1339 | 26.9079 | 0.6281 | 5.4750  |
| IschemicStroke | s_unclassified_Desulfovibrio_sp._3_1_syn3              | Simple mode               | 31 | -0.6797 | 0.6789 | 0.3248 | -0.0653 | 0.0424 | 0.1339 | 26.9079 | 0.6281 | 5.4750  |
| IschemicStroke | s_unclassified_Desulfovibrio_sp._3_1_syn3              | Weighted mode             | 31 | -0.3077 | 0.5219 | 0.5599 | -0.0653 | 0.0424 | 0.1339 | 26.9079 | 0.6281 | 5.4750  |
| IschemicStroke | s_unclassified_Eggerthella_sp._YY7918                  | MR Egger                  | 31 | -0.6076 | 0.5851 | 0.3076 | 0.0626  | 0.0419 | 0.1461 | 28.9767 | 0.5188 | 1.9366  |
| IschemicStroke | s_unclassified_Eggerthella_sp._YY7918                  | Weighted median           | 31 | -0.1237 | 0.3128 | 0.6926 | 0.0626  | 0.0419 | 0.1461 | 28.9767 | 0.5188 | 1.9366  |
| IschemicStroke | s_unclassified_Eggerthella_sp._YY7918                  | Inverse variance weighted | 31 | 0.2034  | 0.2177 | 0.3501 | 0.0626  | 0.0419 | 0.1461 | 28.9767 | 0.5188 | 1.9366  |
| IschemicStroke | s_unclassified_Eggerthella_sp._YY7918                  | Simple mode               | 31 | -0.3373 | 0.5942 | 0.5745 | 0.0626  | 0.0419 | 0.1461 | 28.9767 | 0.5188 | 1.9366  |
| IschemicStroke | s_unclassified_Eggerthella_sp._YY7918                  | Weighted mode             | 31 | -0.3556 | 0.4296 | 0.4143 | 0.0626  | 0.0419 | 0.1461 | 28.9767 | 0.5188 | 1.9366  |
| IschemicStroke | s_unclassified_Enterobacteriaceae_bacterium_9_2_54FAA  | MR Egger                  | 31 | -0.0686 | 0.5649 | 0.9042 | -0.0055 | 0.0405 | 0.8935 | 24.6230 | 0.6977 | 1.0085  |
| IschemicStroke | s_unclassified_Enterobacteriaceae_bacterium_9_2_54FAA  | Weighted median           | 31 | -0.1982 | 0.3040 | 0.5144 | -0.0055 | 0.0405 | 0.8935 | 24.6230 | 0.6977 | 1.0085  |
| IschemicStroke | s_unclassified_Enterobacteriaceae_bacterium_9_2_54FAA  | Inverse variance weighted | 31 | -0.1394 | 0.2099 | 0.5066 | -0.0055 | 0.0405 | 0.8935 | 24.6230 | 0.6977 | 1.0085  |
| IschemicStroke | s_unclassified_Enterobacteriaceae_bacterium_9_2_54FAA  | Simple mode               | 31 | 0.3744  | 0.5706 | 0.5167 | -0.0055 | 0.0405 | 0.8935 | 24.6230 | 0.6977 | 1.0085  |
| IschemicStroke | s_unclassified_Enterobacteriaceae_bacterium_9_2_54FAA  | Weighted mode             | 31 | 0.2161  | 0.4250 | 0.6149 | -0.0055 | 0.0405 | 0.8935 | 24.6230 | 0.6977 | 1.0085  |
| IschemicStroke | s_unclassified_Erysipelotrichaceae_bacterium_3_1_53    | MR Egger                  | 31 | -0.0736 | 0.2001 | 0.7157 | 0.0044  | 0.0143 | 0.7592 | 29.2699 | 0.4511 | 23.3232 |
| IschemicStroke | s_unclassified_Erysipelotrichaceae_bacterium_3_1_53    | Weighted median           | 31 | -0.0619 | 0.1090 | 0.5702 | 0.0044  | 0.0143 | 0.7592 | 29.2699 | 0.4511 | 23.3232 |
| IschemicStroke | s_unclassified_Erysipelotrichaceae_bacterium_3_1_53    | Inverse variance weighted | 31 | -0.0161 | 0.0740 | 0.8277 | 0.0044  | 0.0143 | 0.7592 | 29.2699 | 0.4511 | 23.3232 |
| IschemicStroke | s_unclassified_Erysipelotrichaceae_bacterium_3_1_53    | Simple mode               | 31 | -0.2021 | 0.1969 | 0.3130 | 0.0044  | 0.0143 | 0.7592 | 29.2699 | 0.4511 | 23.3232 |
| IschemicStroke | s_unclassified_Erysipelotrichaceae_bacterium_3_1_53    | Weighted mode             | 31 | -0.0925 | 0.1548 | 0.5543 | 0.0044  | 0.0143 | 0.7592 | 29.2699 | 0.4511 | 23.3232 |
| IschemicStroke | s_unclassified_Erysipelotrichaceae_bacterium_5_2_54FAA | MR Egger                  | 31 | 0.1834  | 0.2424 | 0.4554 | -0.0102 | 0.0174 | 0.5624 | 23.2743 | 0.7638 | 17.9823 |
| IschemicStroke | s_unclassified_Erysipelotrichaceae_bacterium_5_2_54FAA | Weighted median           | 31 | 0.1114  | 0.1354 | 0.4107 | -0.0102 | 0.0174 | 0.5624 | 23.2743 | 0.7638 | 17.9823 |
| IschemicStroke | s_unclassified_Erysipelotrichaceae_bacterium_5_2_54FAA | Inverse variance weighted | 31 | 0.0515  | 0.0901 | 0.5674 | -0.0102 | 0.0174 | 0.5624 | 23.2743 | 0.7638 | 17.9823 |
| IschemicStroke | s_unclassified_Erysipelotrichaceae_bacterium_5_2_54FAA | Simple mode               | 31 | 0.0152  | 0.2690 | 0.9554 | -0.0102 | 0.0174 | 0.5624 | 23.2743 | 0.7638 | 17.9823 |
| IschemicStroke | s_unclassified_Erysipelotrichaceae_bacterium_5_2_54FAA | Weighted mode             | 31 | 0.1011  | 0.1847 | 0.5883 | -0.0102 | 0.0174 | 0.5624 | 23.2743 | 0.7638 | 17.9823 |
| IschemicStroke | s_unclassified_Lachnospiraceae_bacterium_1_4_56FAA     | MR Egger                  | 31 | -0.0227 | 0.2599 | 0.9311 | -0.0060 | 0.0186 | 0.7509 | 30.3625 | 0.3961 | 13.1588 |
| IschemicStroke | s_unclassified_Lachnospiraceae_bacterium_1_4_56FAA     | Weighted median           | 31 | 0.0945  | 0.1396 | 0.4981 | -0.0060 | 0.0186 | 0.7509 | 30.3625 | 0.3961 | 13.1588 |
| IschemicStroke | s_unclassified_Lachnospiraceae_bacterium_1_4_56FAA     | Inverse variance weighted | 31 | -0.1000 | 0.0951 | 0.2932 | -0.0060 | 0.0186 | 0.7509 | 30.3625 | 0.3961 | 13.1588 |
| IschemicStroke | s_unclassified_Lachnospiraceae_bacterium_1_4_56FAA     | Simple mode               | 31 | 0.1254  | 0.2464 | 0.6145 | -0.0060 | 0.0186 | 0.7509 | 30.3625 | 0.3961 | 13.1588 |
| IschemicStroke | s_unclassified_Lachnospiraceae_bacterium_1_4_56FAA     | Weighted mode             | 31 | 0.0825  | 0.2122 | 0.7002 | -0.0060 | 0.0186 | 0.7509 | 30.3625 | 0.3961 | 13.1588 |
| IschemicStroke | s_unclassified_Lachnospiraceae_bacterium_2_1_46FAA     | MR Egger                  | 31 | 0.0619  | 0.4000 | 0.8780 | -0.0039 | 0.0286 | 0.8929 | 36.9651 | 0.1471 | 6.1027  |
| IschemicStroke | s_unclassified_Lachnospiraceae_bacterium_2_1_46FAA     | Weighted median           | 31 | 0.0971  | 0.1897 | 0.6088 | -0.0039 | 0.0286 | 0.8929 | 36.9651 | 0.1471 | 6.1027  |
| IschemicStroke | s_unclassified_Lachnospiraceae_bacterium_2_1_46FAA     | Inverse variance weighted | 31 | 0.0115  | 0.1461 | 0.9374 | -0.0039 | 0.0286 | 0.8929 | 36.9651 | 0.1471 | 6.1027  |
| IschemicStroke | s_unclassified_Lachnospiraceae_bacterium_2_1_46FAA     | Simple mode               | 31 | -0.2701 | 0.3227 | 0.4091 | -0.0039 | 0.0286 | 0.8929 | 36.9651 | 0.1471 | 6.1027  |
| IschemicStroke | s_unclassified_Lachnospiraceae_bacterium_2_1_46FAA     | Weighted mode             | 31 | 0.0821  | 0.2488 | 0.7437 | -0.0039 | 0.0286 | 0.8929 | 36.9651 | 0.1471 | 6.1027  |
| IschemicStroke | s_unclassified_Lachnospiraceae_bacterium_3_1_57FAA_CT1 | MR Egger                  | 31 | 0.0529  | 0.2719 | 0.8470 | -0.0132 | 0.0195 | 0.5032 | 12.9090 | 0.9957 | 15.2716 |
| IschemicStroke | s_unclassified_Lachnospiraceae_bacterium_3_1_57FAA_CT1 | Weighted median           | 31 | -0.0744 | 0.1375 | 0.5887 | -0.0132 | 0.0195 | 0.5032 | 12.9090 | 0.9957 | 15.2716 |
| IschemicStroke | s_unclassified_Lachnospiraceae_bacterium_3_1_57FAA_CT1 | Inverse variance weighted | 31 | -0.1182 | 0.1010 | 0.2421 | -0.0132 | 0.0195 | 0.5032 | 12.9090 | 0.9957 | 15.2716 |
| IschemicStroke | s_unclassified_Lachnospiraceae_bacterium_3_1_57FAA_CT1 | Simple mode               | 31 | -0.0741 | 0.2499 | 0.7690 | -0.0132 | 0.0195 | 0.5032 | 12.9090 | 0.9957 | 15.2716 |
| IschemicStroke | s_unclassified_Lachnospiraceae_bacterium_3_1_57FAA_CT1 | Weighted mode             | 31 | -0.0233 | 0.2277 | 0.9193 | -0.0132 | 0.0195 | 0.5032 | 12.9090 | 0.9957 | 15.2716 |
| IschemicStroke | s_unclassified_Lachnospiraceae_bacterium_9_1_43BFAA    | MR Egger                  | 31 | 0.0331  | 0.3572 | 0.9268 | 0.0077  | 0.0256 | 0.7656 | 26.8464 | 0.5800 | 7.3482  |
| IschemicStroke | s_unclassified_Lachnospiraceae_bacterium_9_1_43BFAA    | Weighted median           | 31 | 0.1494  | 0.1931 | 0.4390 | 0.0077  | 0.0256 | 0.7656 | 26.8464 | 0.5800 | 7.3482  |
| IschemicStroke | s_unclassified_Lachnospiraceae_bacterium_9_1_43BFAA    | Inverse variance weighted | 31 | 0.1329  | 0.1327 | 0.3166 | 0.0077  | 0.0256 | 0.7656 | 26.8464 | 0.5800 | 7.3482  |
| IschemicStroke | s_unclassified_Lachnospiraceae_bacterium_9_1_43BFAA    | Simple mode               | 31 | 0.1489  | 0.3623 | 0.6840 | 0.0077  | 0.0256 | 0.7656 | 26.8464 | 0.5800 | 7.3482  |
| IschemicStroke | s_unclassified_Lachnospiraceae_bacterium_9_1_43BFAA    | Weighted mode             | 31 | 0.0668  | 0.2680 | 0.8049 | 0.0077  | 0.0256 | 0.7656 | 26.8464 | 0.5800 | 7.3482  |
| IschemicStroke | s_unclassified_Megasphaera_sp._UPII_135-E              | MR Egger                  | 31 | 0.1216  | 0.3149 | 0.7022 | -0.0113 | 0.0225 | 0.6214 | 34.2163 | 0.2314 | 11.8882 |
| IschemicStroke | s_unclassified_Megasphaera_sp._UPII_135-E              | Weighted median           | 31 | -0.0785 | 0.1571 | 0.6171 | -0.0113 | 0.0225 | 0.6214 | 34.2163 | 0.2314 | 11.8882 |
| IschemicStroke | s_unclassified_Megasphaera_sp._UPII_135-E              | Inverse variance weighted | 31 | -0.0244 | 0.1155 | 0.8330 | -0.0113 | 0.0225 | 0.6214 | 34.2163 | 0.2314 | 11.8882 |

|                   |                                                 |                           |    |         |        |        |         |        |        |         |        |           |
|-------------------|-------------------------------------------------|---------------------------|----|---------|--------|--------|---------|--------|--------|---------|--------|-----------|
| IschemicStroke    | s_unclassified_Megasphaera_sp._UPII_135-E       | Simple mode               | 31 | -0.5059 | 0.3133 | 0.1168 | -0.0113 | 0.0225 | 0.6214 | 34.2163 | 0.2314 | 11.8882   |
| IschemicStroke    | s_unclassified_Megasphaera_sp._UPII_135-E       | Weighted mode             | 31 | -0.0655 | 0.2344 | 0.7818 | -0.0113 | 0.0225 | 0.6214 | 34.2163 | 0.2314 | 11.8882   |
| IschemicStroke    | s_unclassified_Oribacterium_sp._oral_taxon_078  | MR Egger                  | 31 | -0.6252 | 0.5844 | 0.2935 | 0.0347  | 0.0418 | 0.4139 | 27.4374 | 0.5481 | 1.7794    |
| IschemicStroke    | s_unclassified_Oribacterium_sp._oral_taxon_078  | Weighted median           | 31 | -0.4584 | 0.3102 | 0.1395 | 0.0347  | 0.0418 | 0.4139 | 27.4374 | 0.5481 | 1.7794    |
| IschemicStroke    | s_unclassified_Oribacterium_sp._oral_taxon_078  | Inverse variance weighted | 31 | -0.1753 | 0.2169 | 0.4189 | 0.0347  | 0.0418 | 0.4139 | 27.4374 | 0.5481 | 1.7794    |
| IschemicStroke    | s_unclassified_Oribacterium_sp._oral_taxon_078  | Simple mode               | 31 | -0.6980 | 0.5618 | 0.2237 | 0.0347  | 0.0418 | 0.4139 | 27.4374 | 0.5481 | 1.7794    |
| IschemicStroke    | s_unclassified_Oribacterium_sp._oral_taxon_078  | Weighted mode             | 31 | -0.7735 | 0.4637 | 0.1057 | 0.0347  | 0.0418 | 0.4139 | 27.4374 | 0.5481 | 1.7794    |
| IschemicStroke    | s_unclassified_Oribacterium_sp._oral_taxon_108  | MR Egger                  | 31 | -0.1848 | 0.5818 | 0.7530 | 0.0167  | 0.0416 | 0.6920 | 21.0145 | 0.8586 | 1.6008    |
| IschemicStroke    | s_unclassified_Oribacterium_sp._oral_taxon_108  | Weighted median           | 31 | 0.1054  | 0.3171 | 0.7395 | 0.0167  | 0.0416 | 0.6920 | 21.0145 | 0.8586 | 1.6008    |
| IschemicStroke    | s_unclassified_Oribacterium_sp._oral_taxon_108  | Inverse variance weighted | 31 | 0.0313  | 0.2157 | 0.8844 | 0.0167  | 0.0416 | 0.6920 | 21.0145 | 0.8586 | 1.6008    |
| IschemicStroke    | s_unclassified_Oribacterium_sp._oral_taxon_108  | Simple mode               | 31 | -0.0361 | 0.6476 | 0.9559 | 0.0167  | 0.0416 | 0.6920 | 21.0145 | 0.8586 | 1.6008    |
| IschemicStroke    | s_unclassified_Oribacterium_sp._oral_taxon_108  | Weighted mode             | 31 | 0.2346  | 0.5423 | 0.6684 | 0.0167  | 0.0416 | 0.6920 | 21.0145 | 0.8586 | 1.6008    |
| IschemicStroke    | s_unclassified_Peptoniphilus_sp._oral_taxon_386 | MR Egger                  | 31 | -0.6498 | 0.7438 | 0.3895 | 0.0363  | 0.0533 | 0.5008 | 47.7608 | 0.0156 | 2.6469    |
| IschemicStroke    | s_unclassified_Peptoniphilus_sp._oral_taxon_386 | Weighted median           | 31 | -0.2935 | 0.3320 | 0.3766 | 0.0363  | 0.0533 | 0.5008 | 47.7608 | 0.0156 | 2.6469    |
| IschemicStroke    | s_unclassified_Peptoniphilus_sp._oral_taxon_386 | Inverse variance weighted | 31 | -0.1790 | 0.2741 | 0.5137 | 0.0363  | 0.0533 | 0.5008 | 47.7608 | 0.0156 | 2.6469    |
| IschemicStroke    | s_unclassified_Peptoniphilus_sp._oral_taxon_386 | Simple mode               | 31 | 0.5256  | 0.6539 | 0.4278 | 0.0363  | 0.0533 | 0.5008 | 47.7608 | 0.0156 | 2.6469    |
| IschemicStroke    | s_unclassified_Peptoniphilus_sp._oral_taxon_386 | Weighted mode             | 31 | -0.0311 | 0.4816 | 0.9490 | 0.0363  | 0.0533 | 0.5008 | 47.7608 | 0.0156 | 2.6469    |
| IschemicStroke    | s_unclassified_Prevotella_sp._oral_taxon_472    | MR Egger                  | 31 | -0.1929 | 0.5819 | 0.7426 | 0.0271  | 0.0416 | 0.5204 | 26.1196 | 0.6191 | 1.5642    |
| IschemicStroke    | s_unclassified_Prevotella_sp._oral_taxon_472    | Weighted median           | 31 | 0.2448  | 0.3120 | 0.4327 | 0.0271  | 0.0416 | 0.5204 | 26.1196 | 0.6191 | 1.5642    |
| IschemicStroke    | s_unclassified_Prevotella_sp._oral_taxon_472    | Inverse variance weighted | 31 | 0.1586  | 0.2159 | 0.4625 | 0.0271  | 0.0416 | 0.5204 | 26.1196 | 0.6191 | 1.5642    |
| IschemicStroke    | s_unclassified_Prevotella_sp._oral_taxon_472    | Simple mode               | 31 | 0.2981  | 0.6481 | 0.6489 | 0.0271  | 0.0416 | 0.5204 | 26.1196 | 0.6191 | 1.5642    |
| IschemicStroke    | s_unclassified_Prevotella_sp._oral_taxon_472    | Weighted mode             | 31 | 0.2221  | 0.5463 | 0.6872 | 0.0271  | 0.0416 | 0.5204 | 26.1196 | 0.6191 | 1.5642    |
| IschemicStroke    | s_unclassified_Ruminococcaceae_bacterium_D16    | MR Egger                  | 31 | 0.3596  | 0.2632 | 0.1824 | -0.0220 | 0.0188 | 0.2525 | 34.7012 | 0.2537 | 14.5878   |
| IschemicStroke    | s_unclassified_Ruminococcaceae_bacterium_D16    | Weighted median           | 31 | 0.0858  | 0.1373 | 0.5320 | -0.0220 | 0.0188 | 0.2525 | 34.7012 | 0.2537 | 14.5878   |
| IschemicStroke    | s_unclassified_Ruminococcaceae_bacterium_D16    | Inverse variance weighted | 31 | 0.0743  | 0.0984 | 0.4499 | -0.0220 | 0.0188 | 0.2525 | 34.7012 | 0.2537 | 14.5878   |
| IschemicStroke    | s_unclassified_Ruminococcaceae_bacterium_D16    | Simple mode               | 31 | -0.0873 | 0.2543 | 0.7336 | -0.0220 | 0.0188 | 0.2525 | 34.7012 | 0.2537 | 14.5878   |
| IschemicStroke    | s_unclassified_Ruminococcaceae_bacterium_D16    | Weighted mode             | 31 | 0.2815  | 0.2098 | 0.1898 | -0.0220 | 0.0188 | 0.2525 | 34.7012 | 0.2537 | 14.5878   |
| IschemicStroke    | s_unclassified_Ruminococcus_sp._5_1_39BFAA      | MR Egger                  | 31 | -0.1405 | 0.3386 | 0.6812 | 0.0082  | 0.0242 | 0.7373 | 38.0769 | 0.1206 | 6.3178    |
| IschemicStroke    | s_unclassified_Ruminococcus_sp._5_1_39BFAA      | Weighted median           | 31 | 0.0053  | 0.1653 | 0.9744 | 0.0082  | 0.0242 | 0.7373 | 38.0769 | 0.1206 | 6.3178    |
| IschemicStroke    | s_unclassified_Ruminococcus_sp._5_1_39BFAA      | Inverse variance weighted | 31 | -0.0340 | 0.1239 | 0.7836 | 0.0082  | 0.0242 | 0.7373 | 38.0769 | 0.1206 | 6.3178    |
| IschemicStroke    | s_unclassified_Ruminococcus_sp._5_1_39BFAA      | Simple mode               | 31 | 0.1015  | 0.3321 | 0.7619 | 0.0082  | 0.0242 | 0.7373 | 38.0769 | 0.1206 | 6.3178    |
| IschemicStroke    | s_unclassified_Ruminococcus_sp._5_1_39BFAA      | Weighted mode             | 31 | 0.0600  | 0.2416 | 0.8056 | 0.0082  | 0.0242 | 0.7373 | 38.0769 | 0.1206 | 6.3178    |
| IschemicStroke    | s_unclassified_Streptococcus_sp._C150           | MR Egger                  | 31 | -0.5078 | 0.4083 | 0.2235 | 0.0097  | 0.0292 | 0.7428 | 28.9572 | 0.4673 | 1.0725    |
| IschemicStroke    | s_unclassified_Streptococcus_sp._C150           | Weighted median           | 31 | -0.3269 | 0.2278 | 0.1514 | 0.0097  | 0.0292 | 0.7428 | 28.9572 | 0.4673 | 1.0725    |
| IschemicStroke    | s_unclassified_Streptococcus_sp._C150           | Inverse variance weighted | 31 | -0.3822 | 0.1517 | 0.0118 | 0.0097  | 0.0292 | 0.7428 | 28.9572 | 0.4673 | 1.0725    |
| IschemicStroke    | s_unclassified_Streptococcus_sp._C150           | Simple mode               | 31 | -0.1183 | 0.4149 | 0.7774 | 0.0097  | 0.0292 | 0.7428 | 28.9572 | 0.4673 | 1.0725    |
| IschemicStroke    | s_unclassified_Streptococcus_sp._C150           | Weighted mode             | 31 | -0.2207 | 0.3505 | 0.5338 | 0.0097  | 0.0292 | 0.7428 | 28.9572 | 0.4673 | 1.0725    |
| IschemicStroke    | s_unclassified_Streptococcus_sp._M143           | MR Egger                  | 31 | -0.5190 | 0.5907 | 0.3868 | 0.0249  | 0.0423 | 0.5607 | 30.3367 | 0.3973 | 1.1355    |
| IschemicStroke    | s_unclassified_Streptococcus_sp._M143           | Weighted median           | 31 | -0.0390 | 0.3166 | 0.9019 | 0.0249  | 0.0423 | 0.5607 | 30.3367 | 0.3973 | 1.1355    |
| IschemicStroke    | s_unclassified_Streptococcus_sp._M143           | Inverse variance weighted | 31 | -0.1962 | 0.2171 | 0.3660 | 0.0249  | 0.0423 | 0.5607 | 30.3367 | 0.3973 | 1.1355    |
| IschemicStroke    | s_unclassified_Streptococcus_sp._M143           | Simple mode               | 31 | -0.1134 | 0.5626 | 0.8416 | 0.0249  | 0.0423 | 0.5607 | 30.3367 | 0.3973 | 1.1355    |
| IschemicStroke    | s_unclassified_Streptococcus_sp._M143           | Weighted mode             | 31 | -0.0495 | 0.4328 | 0.9098 | 0.0249  | 0.0423 | 0.5607 | 30.3367 | 0.3973 | 1.1355    |
| IschemicStroke    | s_unclassified_Streptococcus_sp._oral_taxon_071 | MR Egger                  | 31 | -0.2415 | 0.3336 | 0.4749 | 0.0062  | 0.0239 | 0.7959 | 28.1198 | 0.5115 | 5.9242    |
| IschemicStroke    | s_unclassified_Streptococcus_sp._oral_taxon_071 | Weighted median           | 31 | -0.1268 | 0.1850 | 0.4931 | 0.0062  | 0.0239 | 0.7959 | 28.1198 | 0.5115 | 5.9242    |
| IschemicStroke    | s_unclassified_Streptococcus_sp._oral_taxon_071 | Inverse variance weighted | 31 | -0.1606 | 0.1240 | 0.1951 | 0.0062  | 0.0239 | 0.7959 | 28.1198 | 0.5115 | 5.9242    |
| IschemicStroke    | s_unclassified_Streptococcus_sp._oral_taxon_071 | Simple mode               | 31 | -0.1007 | 0.3585 | 0.7807 | 0.0062  | 0.0239 | 0.7959 | 28.1198 | 0.5115 | 5.9242    |
| IschemicStroke    | s_unclassified_Streptococcus_sp._oral_taxon_071 | Weighted mode             | 31 | -0.0162 | 0.2570 | 0.9503 | 0.0062  | 0.0239 | 0.7959 | 28.1198 | 0.5115 | 5.9242    |
| IschemicStroke    | s_unclassified_Veillonella_sp._oral_taxon_158   | MR Egger                  | 31 | -0.7283 | 0.4746 | 0.1358 | 0.0211  | 0.0340 | 0.5394 | 22.5371 | 0.7973 | 2.0909    |
| IschemicStroke    | s_unclassified_Veillonella_sp._oral_taxon_158   | Weighted median           | 31 | -0.4878 | 0.2372 | 0.0397 | 0.0211  | 0.0340 | 0.5394 | 22.5371 | 0.7973 | 2.0909    |
| IschemicStroke    | s_unclassified_Veillonella_sp._oral_taxon_158   | Inverse variance weighted | 31 | -0.4546 | 0.1764 | 0.0100 | 0.0211  | 0.0340 | 0.5394 | 22.5371 | 0.7973 | 2.0909    |
| IschemicStroke    | s_unclassified_Veillonella_sp._oral_taxon_158   | Simple mode               | 31 | -0.5088 | 0.4852 | 0.3027 | 0.0211  | 0.0340 | 0.5394 | 22.5371 | 0.7973 | 2.0909    |
| IschemicStroke    | s_unclassified_Veillonella_sp._oral_taxon_158   | Weighted mode             | 31 | -0.5870 | 0.4074 | 0.1600 | 0.0211  | 0.0340 | 0.5394 | 22.5371 | 0.7973 | 2.0909    |
| LargeArteryStroke | MF0001                                          | MR Egger                  | 18 | -0.0317 | 0.0441 | 0.4828 | 0.0027  | 0.0108 | 0.8042 | 12.0925 | 0.7376 | -561.5966 |
| LargeArteryStroke | MF0001                                          | Weighted median           | 18 | -0.0084 | 0.0195 | 0.6666 | 0.0027  | 0.0108 | 0.8042 | 12.0925 | 0.7376 | -561.5966 |
| LargeArteryStroke | MF0001                                          | Inverse variance weighted | 18 | -0.0212 | 0.0145 | 0.1434 | 0.0027  | 0.0108 | 0.8042 | 12.0925 | 0.7376 | -561.5966 |
| LargeArteryStroke | MF0001                                          | Simple mode               | 18 | 0.0088  | 0.0359 | 0.8085 | 0.0027  | 0.0108 | 0.8042 | 12.0925 | 0.7376 | -561.5966 |
| LargeArteryStroke | MF0001                                          | Weighted mode             | 18 | 0.0039  | 0.0370 | 0.9181 | 0.0027  | 0.0108 | 0.8042 | 12.0925 | 0.7376 | -561.5966 |
| LargeArteryStroke | MF0002                                          | MR Egger                  | 18 | 0.0317  | 0.0738 | 0.6732 | -0.0081 | 0.0181 | 0.6611 | 10.2719 | 0.8520 | -325.5993 |
| LargeArteryStroke | MF0002                                          | Weighted median           | 18 | -0.0082 | 0.0322 | 0.7982 | -0.0081 | 0.0181 | 0.6611 | 10.2719 | 0.8520 | -325.5993 |
| LargeArteryStroke | MF0002                                          | Inverse variance weighted | 18 | 0.0006  | 0.0242 | 0.9814 | -0.0081 | 0.0181 | 0.6611 | 10.2719 | 0.8520 | -325.5993 |
| LargeArteryStroke | MF0002                                          | Simple mode               | 18 | -0.0151 | 0.0585 | 0.7995 | -0.0081 | 0.0181 | 0.6611 | 10.2719 | 0.8520 | -325.5993 |

|                   |        |                           |    |         |        |        |         |        |        |         |        |            |
|-------------------|--------|---------------------------|----|---------|--------|--------|---------|--------|--------|---------|--------|------------|
| LargeArteryStroke | MF0002 | Weighted mode             | 18 | -0.0063 | 0.0520 | 0.9052 | -0.0081 | 0.0181 | 0.6611 | 10.2719 | 0.8520 | -325.5993  |
| LargeArteryStroke | MF0003 | MR Egger                  | 18 | -0.0728 | 0.0499 | 0.1641 | 0.0101  | 0.0122 | 0.4231 | 17.5624 | 0.3501 | -391.2489  |
| LargeArteryStroke | MF0003 | Weighted median           | 18 | -0.0533 | 0.0228 | 0.0192 | 0.0101  | 0.0122 | 0.4231 | 17.5624 | 0.3501 | -391.2489  |
| LargeArteryStroke | MF0003 | Inverse variance weighted | 18 | -0.0340 | 0.0162 | 0.0361 | 0.0101  | 0.0122 | 0.4231 | 17.5624 | 0.3501 | -391.2489  |
| LargeArteryStroke | MF0003 | Simple mode               | 18 | -0.0721 | 0.0446 | 0.1247 | 0.0101  | 0.0122 | 0.4231 | 17.5624 | 0.3501 | -391.2489  |
| LargeArteryStroke | MF0003 | Weighted mode             | 18 | -0.0721 | 0.0434 | 0.1151 | 0.0101  | 0.0122 | 0.4231 | 17.5624 | 0.3501 | -391.2489  |
| LargeArteryStroke | MF0004 | MR Egger                  | 18 | -0.0041 | 0.0418 | 0.9235 | -0.0047 | 0.0103 | 0.6520 | 20.1906 | 0.2118 | -629.2953  |
| LargeArteryStroke | MF0004 | Weighted median           | 18 | -0.0258 | 0.0180 | 0.1502 | -0.0047 | 0.0103 | 0.6520 | 20.1906 | 0.2118 | -629.2953  |
| LargeArteryStroke | MF0004 | Inverse variance weighted | 18 | -0.0222 | 0.0134 | 0.0973 | -0.0047 | 0.0103 | 0.6520 | 20.1906 | 0.2118 | -629.2953  |
| LargeArteryStroke | MF0004 | Simple mode               | 18 | -0.0301 | 0.0321 | 0.3620 | -0.0047 | 0.0103 | 0.6520 | 20.1906 | 0.2118 | -629.2953  |
| LargeArteryStroke | MF0004 | Weighted mode             | 18 | -0.0331 | 0.0281 | 0.2553 | -0.0047 | 0.0103 | 0.6520 | 20.1906 | 0.2118 | -629.2953  |
| LargeArteryStroke | MF0005 | MR Egger                  | 18 | 0.0397  | 0.0580 | 0.5037 | -0.0161 | 0.0142 | 0.2756 | 15.1154 | 0.5872 | -429.2522  |
| LargeArteryStroke | MF0005 | Weighted median           | 18 | -0.0201 | 0.0266 | 0.4491 | -0.0161 | 0.0142 | 0.2756 | 15.1154 | 0.5872 | -429.2522  |
| LargeArteryStroke | MF0005 | Inverse variance weighted | 18 | -0.0222 | 0.0191 | 0.2446 | -0.0161 | 0.0142 | 0.2756 | 15.1154 | 0.5872 | -429.2522  |
| LargeArteryStroke | MF0005 | Simple mode               | 18 | 0.0391  | 0.0532 | 0.4723 | -0.0161 | 0.0142 | 0.2756 | 15.1154 | 0.5872 | -429.2522  |
| LargeArteryStroke | MF0005 | Weighted mode             | 18 | 0.0161  | 0.0504 | 0.7537 | -0.0161 | 0.0142 | 0.2756 | 15.1154 | 0.5872 | -429.2522  |
| LargeArteryStroke | MF0006 | MR Egger                  | 18 | 0.0114  | 0.0331 | 0.7348 | -0.0066 | 0.0081 | 0.4274 | 13.9799 | 0.6002 | -887.9730  |
| LargeArteryStroke | MF0006 | Weighted median           | 18 | -0.0114 | 0.0151 | 0.4495 | -0.0066 | 0.0081 | 0.4274 | 13.9799 | 0.6002 | -887.9730  |
| LargeArteryStroke | MF0006 | Inverse variance weighted | 18 | -0.0141 | 0.0109 | 0.1961 | -0.0066 | 0.0081 | 0.4274 | 13.9799 | 0.6002 | -887.9730  |
| LargeArteryStroke | MF0006 | Simple mode               | 18 | 0.0230  | 0.0279 | 0.4212 | -0.0066 | 0.0081 | 0.4274 | 13.9799 | 0.6002 | -887.9730  |
| LargeArteryStroke | MF0006 | Weighted mode             | 18 | -0.0369 | 0.0263 | 0.1785 | -0.0066 | 0.0081 | 0.4274 | 13.9799 | 0.6002 | -887.9730  |
| LargeArteryStroke | MF0007 | MR Egger                  | 18 | 0.2357  | 0.1081 | 0.0444 | -0.0571 | 0.0265 | 0.0468 | 19.8676 | 0.2811 | -147.9325  |
| LargeArteryStroke | MF0007 | Weighted median           | 18 | -0.0024 | 0.0500 | 0.9624 | -0.0571 | 0.0265 | 0.0468 | 19.8676 | 0.2811 | -147.9325  |
| LargeArteryStroke | MF0007 | Inverse variance weighted | 18 | 0.0158  | 0.0384 | 0.6802 | -0.0571 | 0.0265 | 0.0468 | 19.8676 | 0.2811 | -147.9325  |
| LargeArteryStroke | MF0007 | Simple mode               | 18 | -0.0447 | 0.1091 | 0.6875 | -0.0571 | 0.0265 | 0.0468 | 19.8676 | 0.2811 | -147.9325  |
| LargeArteryStroke | MF0007 | Weighted mode             | 18 | -0.0405 | 0.1052 | 0.7049 | -0.0571 | 0.0265 | 0.0468 | 19.8676 | 0.2811 | -147.9325  |
| LargeArteryStroke | MF0008 | MR Egger                  | 18 | -0.0177 | 0.0238 | 0.4688 | 0.0031  | 0.0058 | 0.6076 | 22.3224 | 0.1331 | -727.7699  |
| LargeArteryStroke | MF0008 | Weighted median           | 18 | -0.0043 | 0.0095 | 0.6486 | 0.0031  | 0.0058 | 0.6076 | 22.3224 | 0.1331 | -727.7699  |
| LargeArteryStroke | MF0008 | Inverse variance weighted | 18 | -0.0059 | 0.0076 | 0.4415 | 0.0031  | 0.0058 | 0.6076 | 22.3224 | 0.1331 | -727.7699  |
| LargeArteryStroke | MF0008 | Simple mode               | 18 | -0.0032 | 0.0181 | 0.8599 | 0.0031  | 0.0058 | 0.6076 | 22.3224 | 0.1331 | -727.7699  |
| LargeArteryStroke | MF0008 | Weighted mode             | 18 | -0.0054 | 0.0173 | 0.7598 | 0.0031  | 0.0058 | 0.6076 | 22.3224 | 0.1331 | -727.7699  |
| LargeArteryStroke | MF0009 | MR Egger                  | 18 | -0.0009 | 0.0359 | 0.9793 | -0.0008 | 0.0088 | 0.9272 | 17.1348 | 0.3769 | -804.6234  |
| LargeArteryStroke | MF0009 | Weighted median           | 18 | -0.0110 | 0.0162 | 0.4960 | -0.0008 | 0.0088 | 0.9272 | 17.1348 | 0.3769 | -804.6234  |
| LargeArteryStroke | MF0009 | Inverse variance weighted | 18 | -0.0041 | 0.0114 | 0.7204 | -0.0008 | 0.0088 | 0.9272 | 17.1348 | 0.3769 | -804.6234  |
| LargeArteryStroke | MF0009 | Simple mode               | 18 | 0.0352  | 0.0289 | 0.2393 | -0.0008 | 0.0088 | 0.9272 | 17.1348 | 0.3769 | -804.6234  |
| LargeArteryStroke | MF0009 | Weighted mode             | 18 | -0.0167 | 0.0277 | 0.5536 | -0.0008 | 0.0088 | 0.9272 | 17.1348 | 0.3769 | -804.6234  |
| LargeArteryStroke | MF0010 | MR Egger                  | 18 | -0.0153 | 0.0194 | 0.4434 | 0.0017  | 0.0048 | 0.7262 | 15.3822 | 0.4968 | -1220.6759 |
| LargeArteryStroke | MF0010 | Weighted median           | 18 | -0.0113 | 0.0092 | 0.2164 | 0.0017  | 0.0048 | 0.7262 | 15.3822 | 0.4968 | -1220.6759 |
| LargeArteryStroke | MF0010 | Inverse variance weighted | 18 | -0.0087 | 0.0064 | 0.1713 | 0.0017  | 0.0048 | 0.7262 | 15.3822 | 0.4968 | -1220.6759 |
| LargeArteryStroke | MF0010 | Simple mode               | 18 | 0.0141  | 0.0177 | 0.4349 | 0.0017  | 0.0048 | 0.7262 | 15.3822 | 0.4968 | -1220.6759 |
| LargeArteryStroke | MF0010 | Weighted mode             | 18 | -0.0198 | 0.0151 | 0.2056 | 0.0017  | 0.0048 | 0.7262 | 15.3822 | 0.4968 | -1220.6759 |
| LargeArteryStroke | MF0011 | MR Egger                  | 18 | 0.1476  | 0.0770 | 0.0733 | -0.0278 | 0.0189 | 0.1606 | 16.1735 | 0.5116 | -237.7521  |
| LargeArteryStroke | MF0011 | Weighted median           | 18 | 0.0683  | 0.0354 | 0.0535 | -0.0278 | 0.0189 | 0.1606 | 16.1735 | 0.5116 | -237.7521  |
| LargeArteryStroke | MF0011 | Inverse variance weighted | 18 | 0.0406  | 0.0253 | 0.1083 | -0.0278 | 0.0189 | 0.1606 | 16.1735 | 0.5116 | -237.7521  |
| LargeArteryStroke | MF0011 | Simple mode               | 18 | 0.1019  | 0.0580 | 0.0966 | -0.0278 | 0.0189 | 0.1606 | 16.1735 | 0.5116 | -237.7521  |
| LargeArteryStroke | MF0011 | Weighted mode             | 18 | 0.0918  | 0.0556 | 0.1172 | -0.0278 | 0.0189 | 0.1606 | 16.1735 | 0.5116 | -237.7521  |
| LargeArteryStroke | MF0012 | MR Egger                  | 18 | 0.3064  | 0.1218 | 0.0229 | -0.0734 | 0.0299 | 0.0257 | 19.3026 | 0.3114 | -80.6282   |
| LargeArteryStroke | MF0012 | Weighted median           | 18 | 0.0241  | 0.0577 | 0.6762 | -0.0734 | 0.0299 | 0.0257 | 19.3026 | 0.3114 | -80.6282   |
| LargeArteryStroke | MF0012 | Inverse variance weighted | 18 | 0.0236  | 0.0426 | 0.5803 | -0.0734 | 0.0299 | 0.0257 | 19.3026 | 0.3114 | -80.6282   |
| LargeArteryStroke | MF0012 | Simple mode               | 18 | -0.1148 | 0.1090 | 0.3068 | -0.0734 | 0.0299 | 0.0257 | 19.3026 | 0.3114 | -80.6282   |
| LargeArteryStroke | MF0012 | Weighted mode             | 18 | 0.0576  | 0.1084 | 0.6018 | -0.0734 | 0.0299 | 0.0257 | 19.3026 | 0.3114 | -80.6282   |
| LargeArteryStroke | MF0013 | MR Egger                  | 18 | 0.0224  | 0.0202 | 0.2826 | -0.0038 | 0.0049 | 0.4552 | 20.1229 | 0.2147 | -838.4018  |
| LargeArteryStroke | MF0013 | Weighted median           | 18 | 0.0028  | 0.0082 | 0.7376 | -0.0038 | 0.0049 | 0.4552 | 20.1229 | 0.2147 | -838.4018  |
| LargeArteryStroke | MF0013 | Inverse variance weighted | 18 | 0.0079  | 0.0065 | 0.2303 | -0.0038 | 0.0049 | 0.4552 | 20.1229 | 0.2147 | -838.4018  |
| LargeArteryStroke | MF0013 | Simple mode               | 18 | -0.0066 | 0.0162 | 0.6897 | -0.0038 | 0.0049 | 0.4552 | 20.1229 | 0.2147 | -838.4018  |
| LargeArteryStroke | MF0013 | Weighted mode             | 18 | 0.0008  | 0.0158 | 0.9599 | -0.0038 | 0.0049 | 0.4552 | 20.1229 | 0.2147 | -838.4018  |
| LargeArteryStroke | MF0014 | MR Egger                  | 18 | -0.0451 | 0.0406 | 0.2841 | 0.0095  | 0.0100 | 0.3552 | 15.2568 | 0.5059 | -724.7996  |
| LargeArteryStroke | MF0014 | Weighted median           | 18 | 0.0042  | 0.0184 | 0.8203 | 0.0095  | 0.0100 | 0.3552 | 15.2568 | 0.5059 | -724.7996  |
| LargeArteryStroke | MF0014 | Inverse variance weighted | 18 | -0.0085 | 0.0133 | 0.5247 | 0.0095  | 0.0100 | 0.3552 | 15.2568 | 0.5059 | -724.7996  |
| LargeArteryStroke | MF0014 | Simple mode               | 18 | 0.0083  | 0.0329 | 0.8033 | 0.0095  | 0.0100 | 0.3552 | 15.2568 | 0.5059 | -724.7996  |
| LargeArteryStroke | MF0014 | Weighted mode             | 18 | 0.0090  | 0.0323 | 0.7830 | 0.0095  | 0.0100 | 0.3552 | 15.2568 | 0.5059 | -724.7996  |

|                   |        |                           |    |         |        |        |         |        |        |         |        |            |
|-------------------|--------|---------------------------|----|---------|--------|--------|---------|--------|--------|---------|--------|------------|
| LargeArteryStroke | MF0015 | MR Egger                  | 18 | 0.2020  | 0.0818 | 0.0252 | -0.0401 | 0.0201 | 0.0627 | 12.8917 | 0.7434 | -219.1922  |
| LargeArteryStroke | MF0015 | Weighted median           | 18 | 0.0828  | 0.0370 | 0.0254 | -0.0401 | 0.0201 | 0.0627 | 12.8917 | 0.7434 | -219.1922  |
| LargeArteryStroke | MF0015 | Inverse variance weighted | 18 | 0.0474  | 0.0269 | 0.0778 | -0.0401 | 0.0201 | 0.0627 | 12.8917 | 0.7434 | -219.1922  |
| LargeArteryStroke | MF0015 | Simple mode               | 18 | 0.1049  | 0.0625 | 0.1118 | -0.0401 | 0.0201 | 0.0627 | 12.8917 | 0.7434 | -219.1922  |
| LargeArteryStroke | MF0015 | Weighted mode             | 18 | 0.1073  | 0.0623 | 0.1031 | -0.0401 | 0.0201 | 0.0627 | 12.8917 | 0.7434 | -219.1922  |
| LargeArteryStroke | MF0016 | MR Egger                  | 18 | 0.0331  | 0.0675 | 0.6305 | -0.0090 | 0.0165 | 0.5939 | 15.6624 | 0.4768 | -388.5552  |
| LargeArteryStroke | MF0016 | Weighted median           | 18 | -0.0160 | 0.0303 | 0.5961 | -0.0090 | 0.0165 | 0.5939 | 15.6624 | 0.4768 | -388.5552  |
| LargeArteryStroke | MF0016 | Inverse variance weighted | 18 | -0.0016 | 0.0222 | 0.9430 | -0.0090 | 0.0165 | 0.5939 | 15.6624 | 0.4768 | -388.5552  |
| LargeArteryStroke | MF0016 | Simple mode               | 18 | 0.0340  | 0.0550 | 0.5448 | -0.0090 | 0.0165 | 0.5939 | 15.6624 | 0.4768 | -388.5552  |
| LargeArteryStroke | MF0016 | Weighted mode             | 18 | -0.0017 | 0.0554 | 0.9764 | -0.0090 | 0.0165 | 0.5939 | 15.6624 | 0.4768 | -388.5552  |
| LargeArteryStroke | MF0017 | MR Egger                  | 18 | -0.0157 | 0.0232 | 0.5082 | 0.0026  | 0.0057 | 0.6506 | 21.2464 | 0.1692 | -837.7345  |
| LargeArteryStroke | MF0017 | Weighted median           | 18 | -0.0010 | 0.0098 | 0.9193 | 0.0026  | 0.0057 | 0.6506 | 21.2464 | 0.1692 | -837.7345  |
| LargeArteryStroke | MF0017 | Inverse variance weighted | 18 | -0.0056 | 0.0074 | 0.4526 | 0.0026  | 0.0057 | 0.6506 | 21.2464 | 0.1692 | -837.7345  |
| LargeArteryStroke | MF0017 | Simple mode               | 18 | 0.0123  | 0.0202 | 0.5503 | 0.0026  | 0.0057 | 0.6506 | 21.2464 | 0.1692 | -837.7345  |
| LargeArteryStroke | MF0017 | Weighted mode             | 18 | 0.0108  | 0.0191 | 0.5799 | 0.0026  | 0.0057 | 0.6506 | 21.2464 | 0.1692 | -837.7345  |
| LargeArteryStroke | MF0018 | MR Egger                  | 18 | -0.0032 | 0.0226 | 0.8893 | 0.0023  | 0.0056 | 0.6862 | 6.5113  | 0.9816 | -1722.1532 |
| LargeArteryStroke | MF0018 | Weighted median           | 18 | 0.0112  | 0.0095 | 0.2363 | 0.0023  | 0.0056 | 0.6862 | 6.5113  | 0.9816 | -1722.1532 |
| LargeArteryStroke | MF0018 | Inverse variance weighted | 18 | 0.0056  | 0.0074 | 0.4514 | 0.0023  | 0.0056 | 0.6862 | 6.5113  | 0.9816 | -1722.1532 |
| LargeArteryStroke | MF0018 | Simple mode               | 18 | 0.0179  | 0.0165 | 0.2922 | 0.0023  | 0.0056 | 0.6862 | 6.5113  | 0.9816 | -1722.1532 |
| LargeArteryStroke | MF0018 | Weighted mode             | 18 | 0.0177  | 0.0149 | 0.2510 | 0.0023  | 0.0056 | 0.6862 | 6.5113  | 0.9816 | -1722.1532 |
| LargeArteryStroke | MF0019 | MR Egger                  | 18 | -0.0224 | 0.0507 | 0.6643 | 0.0039  | 0.0124 | 0.7565 | 16.4767 | 0.4202 | -406.9304  |
| LargeArteryStroke | MF0019 | Weighted median           | 18 | -0.0079 | 0.0229 | 0.7314 | 0.0039  | 0.0124 | 0.7565 | 16.4767 | 0.4202 | -406.9304  |
| LargeArteryStroke | MF0019 | Inverse variance weighted | 18 | -0.0073 | 0.0164 | 0.6561 | 0.0039  | 0.0124 | 0.7565 | 16.4767 | 0.4202 | -406.9304  |
| LargeArteryStroke | MF0019 | Simple mode               | 18 | -0.0327 | 0.0430 | 0.4572 | 0.0039  | 0.0124 | 0.7565 | 16.4767 | 0.4202 | -406.9304  |
| LargeArteryStroke | MF0019 | Weighted mode             | 18 | -0.0236 | 0.0385 | 0.5475 | 0.0039  | 0.0124 | 0.7565 | 16.4767 | 0.4202 | -406.9304  |
| LargeArteryStroke | MF0020 | MR Egger                  | 18 | 0.0610  | 0.0781 | 0.4464 | -0.0107 | 0.0192 | 0.5832 | 16.6621 | 0.4078 | -219.3057  |
| LargeArteryStroke | MF0020 | Weighted median           | 18 | 0.0055  | 0.0371 | 0.8811 | -0.0107 | 0.0192 | 0.5832 | 16.6621 | 0.4078 | -219.3057  |
| LargeArteryStroke | MF0020 | Inverse variance weighted | 18 | 0.0197  | 0.0251 | 0.4344 | -0.0107 | 0.0192 | 0.5832 | 16.6621 | 0.4078 | -219.3057  |
| LargeArteryStroke | MF0020 | Simple mode               | 18 | -0.0033 | 0.0640 | 0.9591 | -0.0107 | 0.0192 | 0.5832 | 16.6621 | 0.4078 | -219.3057  |
| LargeArteryStroke | MF0020 | Weighted mode             | 18 | -0.0020 | 0.0643 | 0.9759 | -0.0107 | 0.0192 | 0.5832 | 16.6621 | 0.4078 | -219.3057  |
| LargeArteryStroke | MF0021 | MR Egger                  | 18 | 0.0274  | 0.0314 | 0.3956 | -0.0086 | 0.0077 | 0.2813 | 14.3305 | 0.6436 | -1067.9954 |
| LargeArteryStroke | MF0021 | Weighted median           | 18 | -0.0079 | 0.0141 | 0.5762 | -0.0086 | 0.0077 | 0.2813 | 14.3305 | 0.6436 | -1067.9954 |
| LargeArteryStroke | MF0021 | Inverse variance weighted | 18 | -0.0057 | 0.0103 | 0.5828 | -0.0086 | 0.0077 | 0.2813 | 14.3305 | 0.6436 | -1067.9954 |
| LargeArteryStroke | MF0021 | Simple mode               | 18 | -0.0190 | 0.0263 | 0.4792 | -0.0086 | 0.0077 | 0.2813 | 14.3305 | 0.6436 | -1067.9954 |
| LargeArteryStroke | MF0021 | Weighted mode             | 18 | -0.0139 | 0.0240 | 0.5713 | -0.0086 | 0.0077 | 0.2813 | 14.3305 | 0.6436 | -1067.9954 |
| LargeArteryStroke | MF0022 | MR Egger                  | 18 | 0.0347  | 0.0295 | 0.2569 | -0.0130 | 0.0072 | 0.0917 | 6.9892  | 0.9837 | -1521.3706 |
| LargeArteryStroke | MF0022 | Weighted median           | 18 | -0.0150 | 0.0130 | 0.2484 | -0.0130 | 0.0072 | 0.0917 | 6.9892  | 0.9837 | -1521.3706 |
| LargeArteryStroke | MF0022 | Inverse variance weighted | 18 | -0.0153 | 0.0097 | 0.1140 | -0.0130 | 0.0072 | 0.0917 | 6.9892  | 0.9837 | -1521.3706 |
| LargeArteryStroke | MF0022 | Simple mode               | 18 | -0.0184 | 0.0237 | 0.4471 | -0.0130 | 0.0072 | 0.0917 | 6.9892  | 0.9837 | -1521.3706 |
| LargeArteryStroke | MF0022 | Weighted mode             | 18 | -0.0167 | 0.0224 | 0.4657 | -0.0130 | 0.0072 | 0.0917 | 6.9892  | 0.9837 | -1521.3706 |
| LargeArteryStroke | MF0024 | MR Egger                  | 18 | 0.1461  | 0.3499 | 0.6818 | -0.0376 | 0.0858 | 0.6673 | 28.7308 | 0.0258 | -2.2719    |
| LargeArteryStroke | MF0024 | Weighted median           | 18 | 0.0888  | 0.1283 | 0.4888 | -0.0376 | 0.0858 | 0.6673 | 28.7308 | 0.0258 | -2.2719    |
| LargeArteryStroke | MF0024 | Inverse variance weighted | 18 | 0.0014  | 0.1121 | 0.9902 | -0.0376 | 0.0858 | 0.6673 | 28.7308 | 0.0258 | -2.2719    |
| LargeArteryStroke | MF0024 | Simple mode               | 18 | 0.1141  | 0.2154 | 0.6030 | -0.0376 | 0.0858 | 0.6673 | 28.7308 | 0.0258 | -2.2719    |
| LargeArteryStroke | MF0024 | Weighted mode             | 18 | 0.1356  | 0.2056 | 0.5183 | -0.0376 | 0.0858 | 0.6673 | 28.7308 | 0.0258 | -2.2719    |
| LargeArteryStroke | MF0025 | MR Egger                  | 18 | -0.0853 | 0.1441 | 0.5621 | 0.0374  | 0.0353 | 0.3049 | 22.4115 | 0.1694 | -61.1506   |
| LargeArteryStroke | MF0025 | Weighted median           | 18 | 0.0815  | 0.0604 | 0.1775 | 0.0374  | 0.0353 | 0.3049 | 22.4115 | 0.1694 | -61.1506   |
| LargeArteryStroke | MF0025 | Inverse variance weighted | 18 | 0.0589  | 0.0475 | 0.2145 | 0.0374  | 0.0353 | 0.3049 | 22.4115 | 0.1694 | -61.1506   |
| LargeArteryStroke | MF0025 | Simple mode               | 18 | 0.1185  | 0.1020 | 0.2613 | 0.0374  | 0.0353 | 0.3049 | 22.4115 | 0.1694 | -61.1506   |
| LargeArteryStroke | MF0025 | Weighted mode             | 18 | 0.1185  | 0.1036 | 0.2685 | 0.0374  | 0.0353 | 0.3049 | 22.4115 | 0.1694 | -61.1506   |
| LargeArteryStroke | MF0026 | MR Egger                  | 18 | -0.0112 | 0.0222 | 0.6197 | 0.0017  | 0.0054 | 0.7628 | 13.6780 | 0.6227 | -836.8005  |
| LargeArteryStroke | MF0026 | Weighted median           | 18 | -0.0075 | 0.0098 | 0.4395 | 0.0017  | 0.0054 | 0.7628 | 13.6780 | 0.6227 | -836.8005  |
| LargeArteryStroke | MF0026 | Inverse variance weighted | 18 | -0.0048 | 0.0073 | 0.5106 | 0.0017  | 0.0054 | 0.7628 | 13.6780 | 0.6227 | -836.8005  |
| LargeArteryStroke | MF0026 | Simple mode               | 18 | -0.0074 | 0.0176 | 0.6781 | 0.0017  | 0.0054 | 0.7628 | 13.6780 | 0.6227 | -836.8005  |
| LargeArteryStroke | MF0026 | Weighted mode             | 18 | -0.0098 | 0.0161 | 0.5518 | 0.0017  | 0.0054 | 0.7628 | 13.6780 | 0.6227 | -836.8005  |
| LargeArteryStroke | MF0027 | MR Egger                  | 18 | -0.2481 | 0.1681 | 0.1594 | 0.0520  | 0.0412 | 0.2250 | 18.7888 | 0.3408 | -73.1037   |
| LargeArteryStroke | MF0027 | Weighted median           | 18 | -0.1029 | 0.0741 | 0.1651 | 0.0520  | 0.0412 | 0.2250 | 18.7888 | 0.3408 | -73.1037   |
| LargeArteryStroke | MF0027 | Inverse variance weighted | 18 | -0.0477 | 0.0562 | 0.3955 | 0.0520  | 0.0412 | 0.2250 | 18.7888 | 0.3408 | -73.1037   |
| LargeArteryStroke | MF0027 | Simple mode               | 18 | -0.1235 | 0.1405 | 0.3915 | 0.0520  | 0.0412 | 0.2250 | 18.7888 | 0.3408 | -73.1037   |
| LargeArteryStroke | MF0027 | Weighted mode             | 18 | -0.1136 | 0.1278 | 0.3866 | 0.0520  | 0.0412 | 0.2250 | 18.7888 | 0.3408 | -73.1037   |
| LargeArteryStroke | MF0028 | MR Egger                  | 18 | -0.0342 | 0.0336 | 0.3234 | 0.0057  | 0.0082 | 0.4965 | 8.8111  | 0.9210 | -691.6094  |

|                   |        |                           |    |         |        |        |         |        |        |         |        |            |
|-------------------|--------|---------------------------|----|---------|--------|--------|---------|--------|--------|---------|--------|------------|
| LargeArteryStroke | MF0028 | Weighted median           | 18 | -0.0079 | 0.0152 | 0.6037 | 0.0057  | 0.0082 | 0.4965 | 8.8111  | 0.9210 | -691.6094  |
| LargeArteryStroke | MF0028 | Inverse variance weighted | 18 | -0.0122 | 0.0110 | 0.2707 | 0.0057  | 0.0082 | 0.4965 | 8.8111  | 0.9210 | -691.6094  |
| LargeArteryStroke | MF0028 | Simple mode               | 18 | -0.0067 | 0.0226 | 0.7700 | 0.0057  | 0.0082 | 0.4965 | 8.8111  | 0.9210 | -691.6094  |
| LargeArteryStroke | MF0028 | Weighted mode             | 18 | -0.0072 | 0.0234 | 0.7633 | 0.0057  | 0.0082 | 0.4965 | 8.8111  | 0.9210 | -691.6094  |
| LargeArteryStroke | MF0029 | MR Egger                  | 18 | -0.0229 | 0.0738 | 0.7601 | -0.0008 | 0.0181 | 0.9652 | 24.1546 | 0.0862 | -305.6431  |
| LargeArteryStroke | MF0029 | Weighted median           | 18 | -0.0032 | 0.0294 | 0.9140 | -0.0008 | 0.0181 | 0.9652 | 24.1546 | 0.0862 | -305.6431  |
| LargeArteryStroke | MF0029 | Inverse variance weighted | 18 | -0.0260 | 0.0235 | 0.2686 | -0.0008 | 0.0181 | 0.9652 | 24.1546 | 0.0862 | -305.6431  |
| LargeArteryStroke | MF0029 | Simple mode               | 18 | 0.0518  | 0.0594 | 0.3956 | -0.0008 | 0.0181 | 0.9652 | 24.1546 | 0.0862 | -305.6431  |
| LargeArteryStroke | MF0029 | Weighted mode             | 18 | 0.0416  | 0.0539 | 0.4511 | -0.0008 | 0.0181 | 0.9652 | 24.1546 | 0.0862 | -305.6431  |
| LargeArteryStroke | MF0030 | MR Egger                  | 18 | -0.0262 | 0.0952 | 0.7863 | 0.0155  | 0.0233 | 0.5165 | 12.3086 | 0.7225 | -159.4574  |
| LargeArteryStroke | MF0030 | Weighted median           | 18 | 0.0294  | 0.0426 | 0.4909 | 0.0155  | 0.0233 | 0.5165 | 12.3086 | 0.7225 | -159.4574  |
| LargeArteryStroke | MF0030 | Inverse variance weighted | 18 | 0.0334  | 0.0313 | 0.2853 | 0.0155  | 0.0233 | 0.5165 | 12.3086 | 0.7225 | -159.4574  |
| LargeArteryStroke | MF0030 | Simple mode               | 18 | 0.0258  | 0.0680 | 0.7089 | 0.0155  | 0.0233 | 0.5165 | 12.3086 | 0.7225 | -159.4574  |
| LargeArteryStroke | MF0030 | Weighted mode             | 18 | 0.0337  | 0.0663 | 0.6183 | 0.0155  | 0.0233 | 0.5165 | 12.3086 | 0.7225 | -159.4574  |
| LargeArteryStroke | MF0031 | MR Egger                  | 18 | -0.0308 | 0.1474 | 0.8371 | 0.0193  | 0.0362 | 0.6003 | 19.4909 | 0.2440 | -82.4726   |
| LargeArteryStroke | MF0031 | Weighted median           | 18 | 0.0999  | 0.0648 | 0.1231 | 0.0193  | 0.0362 | 0.6003 | 19.4909 | 0.2440 | -82.4726   |
| LargeArteryStroke | MF0031 | Inverse variance weighted | 18 | 0.0436  | 0.0474 | 0.3572 | 0.0193  | 0.0362 | 0.6003 | 19.4909 | 0.2440 | -82.4726   |
| LargeArteryStroke | MF0031 | Simple mode               | 18 | 0.1115  | 0.1070 | 0.3121 | 0.0193  | 0.0362 | 0.6003 | 19.4909 | 0.2440 | -82.4726   |
| LargeArteryStroke | MF0031 | Weighted mode             | 18 | 0.1115  | 0.1152 | 0.3467 | 0.0193  | 0.0362 | 0.6003 | 19.4909 | 0.2440 | -82.4726   |
| LargeArteryStroke | MF0032 | MR Egger                  | 18 | -0.0039 | 0.2253 | 0.9864 | 0.0129  | 0.0553 | 0.8188 | 12.7942 | 0.6877 | -50.7126   |
| LargeArteryStroke | MF0032 | Weighted median           | 18 | -0.0228 | 0.0979 | 0.8158 | 0.0129  | 0.0553 | 0.8188 | 12.7942 | 0.6877 | -50.7126   |
| LargeArteryStroke | MF0032 | Inverse variance weighted | 18 | 0.0457  | 0.0740 | 0.5370 | 0.0129  | 0.0553 | 0.8188 | 12.7942 | 0.6877 | -50.7126   |
| LargeArteryStroke | MF0032 | Simple mode               | 18 | -0.0046 | 0.1641 | 0.9781 | 0.0129  | 0.0553 | 0.8188 | 12.7942 | 0.6877 | -50.7126   |
| LargeArteryStroke | MF0032 | Weighted mode             | 18 | -0.0015 | 0.1518 | 0.9922 | 0.0129  | 0.0553 | 0.8188 | 12.7942 | 0.6877 | -50.7126   |
| LargeArteryStroke | MF0033 | MR Egger                  | 18 | 0.0225  | 0.0209 | 0.2984 | -0.0030 | 0.0051 | 0.5706 | 12.2187 | 0.7288 | -1341.0355 |
| LargeArteryStroke | MF0033 | Weighted median           | 18 | 0.0159  | 0.0091 | 0.0804 | -0.0030 | 0.0051 | 0.5706 | 12.2187 | 0.7288 | -1341.0355 |
| LargeArteryStroke | MF0033 | Inverse variance weighted | 18 | 0.0110  | 0.0069 | 0.1079 | -0.0030 | 0.0051 | 0.5706 | 12.2187 | 0.7288 | -1341.0355 |
| LargeArteryStroke | MF0033 | Simple mode               | 18 | 0.0177  | 0.0139 | 0.2216 | -0.0030 | 0.0051 | 0.5706 | 12.2187 | 0.7288 | -1341.0355 |
| LargeArteryStroke | MF0033 | Weighted mode             | 18 | 0.0183  | 0.0141 | 0.2105 | -0.0030 | 0.0051 | 0.5706 | 12.2187 | 0.7288 | -1341.0355 |
| LargeArteryStroke | MF0034 | MR Egger                  | 18 | -0.1435 | 0.0743 | 0.0713 | 0.0293  | 0.0182 | 0.1268 | 25.5294 | 0.0835 | -240.8580  |
| LargeArteryStroke | MF0034 | Weighted median           | 18 | -0.0523 | 0.0324 | 0.1065 | 0.0293  | 0.0182 | 0.1268 | 25.5294 | 0.0835 | -240.8580  |
| LargeArteryStroke | MF0034 | Inverse variance weighted | 18 | -0.0305 | 0.0255 | 0.2321 | 0.0293  | 0.0182 | 0.1268 | 25.5294 | 0.0835 | -240.8580  |
| LargeArteryStroke | MF0034 | Simple mode               | 18 | -0.0712 | 0.0643 | 0.2836 | 0.0293  | 0.0182 | 0.1268 | 25.5294 | 0.0835 | -240.8580  |
| LargeArteryStroke | MF0034 | Weighted mode             | 18 | -0.0725 | 0.0610 | 0.2510 | 0.0293  | 0.0182 | 0.1268 | 25.5294 | 0.0835 | -240.8580  |
| LargeArteryStroke | MF0035 | MR Egger                  | 18 | -0.1321 | 0.0947 | 0.1822 | 0.0350  | 0.0232 | 0.1512 | 22.6841 | 0.1598 | -157.5056  |
| LargeArteryStroke | MF0035 | Weighted median           | 18 | 0.0185  | 0.0414 | 0.6545 | 0.0350  | 0.0232 | 0.1512 | 22.6841 | 0.1598 | -157.5056  |
| LargeArteryStroke | MF0035 | Inverse variance weighted | 18 | 0.0028  | 0.0322 | 0.9316 | 0.0350  | 0.0232 | 0.1512 | 22.6841 | 0.1598 | -157.5056  |
| LargeArteryStroke | MF0035 | Simple mode               | 18 | 0.0295  | 0.0766 | 0.7053 | 0.0350  | 0.0232 | 0.1512 | 22.6841 | 0.1598 | -157.5056  |
| LargeArteryStroke | MF0035 | Weighted mode             | 18 | 0.0221  | 0.0684 | 0.7510 | 0.0350  | 0.0232 | 0.1512 | 22.6841 | 0.1598 | -157.5056  |
| LargeArteryStroke | MF0036 | MR Egger                  | 18 | 0.0600  | 0.0622 | 0.3489 | -0.0087 | 0.0153 | 0.5779 | 17.4659 | 0.3561 | -339.5005  |
| LargeArteryStroke | MF0036 | Weighted median           | 18 | 0.0458  | 0.0278 | 0.0988 | -0.0087 | 0.0153 | 0.5779 | 17.4659 | 0.3561 | -339.5005  |
| LargeArteryStroke | MF0036 | Inverse variance weighted | 18 | 0.0267  | 0.0200 | 0.1829 | -0.0087 | 0.0153 | 0.5779 | 17.4659 | 0.3561 | -339.5005  |
| LargeArteryStroke | MF0036 | Simple mode               | 18 | 0.0519  | 0.0536 | 0.3460 | -0.0087 | 0.0153 | 0.5779 | 17.4659 | 0.3561 | -339.5005  |
| LargeArteryStroke | MF0036 | Weighted mode             | 18 | 0.0585  | 0.0513 | 0.2697 | -0.0087 | 0.0153 | 0.5779 | 17.4659 | 0.3561 | -339.5005  |
| LargeArteryStroke | MF0037 | MR Egger                  | 18 | -0.0821 | 0.1324 | 0.5438 | 0.0245  | 0.0325 | 0.4615 | 26.2486 | 0.0506 | -114.9271  |
| LargeArteryStroke | MF0037 | Weighted median           | 18 | 0.0300  | 0.0510 | 0.5564 | 0.0245  | 0.0325 | 0.4615 | 26.2486 | 0.0506 | -114.9271  |
| LargeArteryStroke | MF0037 | Inverse variance weighted | 18 | 0.0122  | 0.0429 | 0.7755 | 0.0245  | 0.0325 | 0.4615 | 26.2486 | 0.0506 | -114.9271  |
| LargeArteryStroke | MF0037 | Simple mode               | 18 | -0.0037 | 0.0972 | 0.9703 | 0.0245  | 0.0325 | 0.4615 | 26.2486 | 0.0506 | -114.9271  |
| LargeArteryStroke | MF0037 | Weighted mode             | 18 | 0.0156  | 0.0867 | 0.8597 | 0.0245  | 0.0325 | 0.4615 | 26.2486 | 0.0506 | -114.9271  |
| LargeArteryStroke | MF0038 | MR Egger                  | 18 | 0.0221  | 0.0281 | 0.4438 | -0.0046 | 0.0069 | 0.5147 | 12.2270 | 0.7282 | -793.5241  |
| LargeArteryStroke | MF0038 | Weighted median           | 18 | 0.0071  | 0.0124 | 0.5650 | -0.0046 | 0.0069 | 0.5147 | 12.2270 | 0.7282 | -793.5241  |
| LargeArteryStroke | MF0038 | Inverse variance weighted | 18 | 0.0044  | 0.0092 | 0.6353 | -0.0046 | 0.0069 | 0.5147 | 12.2270 | 0.7282 | -793.5241  |
| LargeArteryStroke | MF0038 | Simple mode               | 18 | 0.0115  | 0.0210 | 0.5919 | -0.0046 | 0.0069 | 0.5147 | 12.2270 | 0.7282 | -793.5241  |
| LargeArteryStroke | MF0038 | Weighted mode             | 18 | 0.0135  | 0.0194 | 0.4954 | -0.0046 | 0.0069 | 0.5147 | 12.2270 | 0.7282 | -793.5241  |
| LargeArteryStroke | MF0039 | MR Egger                  | 18 | -0.0824 | 0.1520 | 0.5952 | 0.0332  | 0.0373 | 0.3859 | 19.1982 | 0.2585 | -125.4543  |
| LargeArteryStroke | MF0039 | Weighted median           | 18 | -0.0061 | 0.0672 | 0.9271 | 0.0332  | 0.0373 | 0.3859 | 19.1982 | 0.2585 | -125.4543  |
| LargeArteryStroke | MF0039 | Inverse variance weighted | 18 | 0.0456  | 0.0496 | 0.3580 | 0.0332  | 0.0373 | 0.3859 | 19.1982 | 0.2585 | -125.4543  |
| LargeArteryStroke | MF0039 | Simple mode               | 18 | -0.0507 | 0.1302 | 0.7016 | 0.0332  | 0.0373 | 0.3859 | 19.1982 | 0.2585 | -125.4543  |
| LargeArteryStroke | MF0039 | Weighted mode             | 18 | -0.0760 | 0.1279 | 0.5599 | 0.0332  | 0.0373 | 0.3859 | 19.1982 | 0.2585 | -125.4543  |
| LargeArteryStroke | MF0040 | MR Egger                  | 18 | 0.0021  | 0.1467 | 0.9886 | 0.0050  | 0.0360 | 0.8914 | 16.7368 | 0.4028 | -124.6089  |
| LargeArteryStroke | MF0040 | Weighted median           | 18 | 0.0620  | 0.0651 | 0.3409 | 0.0050  | 0.0360 | 0.8914 | 16.7368 | 0.4028 | -124.6089  |

|                   |        |                           |    |         |        |        |         |        |        |         |        |            |
|-------------------|--------|---------------------------|----|---------|--------|--------|---------|--------|--------|---------|--------|------------|
| LargeArteryStroke | MF0040 | Inverse variance weighted | 18 | 0.0213  | 0.0471 | 0.6503 | 0.0050  | 0.0360 | 0.8914 | 16.7368 | 0.4028 | -124.6089  |
| LargeArteryStroke | MF0040 | Simple mode               | 18 | 0.1860  | 0.1194 | 0.1375 | 0.0050  | 0.0360 | 0.8914 | 16.7368 | 0.4028 | -124.6089  |
| LargeArteryStroke | MF0040 | Weighted mode             | 18 | 0.1663  | 0.1178 | 0.1763 | 0.0050  | 0.0360 | 0.8914 | 16.7368 | 0.4028 | -124.6089  |
| LargeArteryStroke | MF0041 | MR Egger                  | 18 | 0.0478  | 0.0720 | 0.5165 | -0.0033 | 0.0177 | 0.8522 | 11.3767 | 0.7857 | -303.8464  |
| LargeArteryStroke | MF0041 | Weighted median           | 18 | 0.0579  | 0.0317 | 0.0681 | -0.0033 | 0.0177 | 0.8522 | 11.3767 | 0.7857 | -303.8464  |
| LargeArteryStroke | MF0041 | Inverse variance weighted | 18 | 0.0349  | 0.0236 | 0.1400 | -0.0033 | 0.0177 | 0.8522 | 11.3767 | 0.7857 | -303.8464  |
| LargeArteryStroke | MF0041 | Simple mode               | 18 | 0.0731  | 0.0525 | 0.1819 | -0.0033 | 0.0177 | 0.8522 | 11.3767 | 0.7857 | -303.8464  |
| LargeArteryStroke | MF0041 | Weighted mode             | 18 | 0.0711  | 0.0518 | 0.1879 | -0.0033 | 0.0177 | 0.8522 | 11.3767 | 0.7857 | -303.8464  |
| LargeArteryStroke | MF0043 | MR Egger                  | 18 | 0.1231  | 0.0795 | 0.1409 | -0.0190 | 0.0195 | 0.3438 | 12.6691 | 0.7580 | -245.2079  |
| LargeArteryStroke | MF0043 | Weighted median           | 18 | 0.0544  | 0.0346 | 0.1162 | -0.0190 | 0.0195 | 0.3438 | 12.6691 | 0.7580 | -245.2079  |
| LargeArteryStroke | MF0043 | Inverse variance weighted | 18 | 0.0499  | 0.0261 | 0.0560 | -0.0190 | 0.0195 | 0.3438 | 12.6691 | 0.7580 | -245.2079  |
| LargeArteryStroke | MF0043 | Simple mode               | 18 | 0.0851  | 0.0566 | 0.1510 | -0.0190 | 0.0195 | 0.3438 | 12.6691 | 0.7580 | -245.2079  |
| LargeArteryStroke | MF0043 | Weighted mode             | 18 | 0.0910  | 0.0537 | 0.1085 | -0.0190 | 0.0195 | 0.3438 | 12.6691 | 0.7580 | -245.2079  |
| LargeArteryStroke | MF0044 | MR Egger                  | 18 | 0.0155  | 0.0251 | 0.5465 | -0.0081 | 0.0062 | 0.2072 | 20.6639 | 0.2417 | -711.9231  |
| LargeArteryStroke | MF0044 | Weighted median           | 18 | -0.0244 | 0.0116 | 0.0348 | -0.0081 | 0.0062 | 0.2072 | 20.6639 | 0.2417 | -711.9231  |
| LargeArteryStroke | MF0044 | Inverse variance weighted | 18 | -0.0157 | 0.0084 | 0.0622 | -0.0081 | 0.0062 | 0.2072 | 20.6639 | 0.2417 | -711.9231  |
| LargeArteryStroke | MF0044 | Simple mode               | 18 | -0.0291 | 0.0204 | 0.1712 | -0.0081 | 0.0062 | 0.2072 | 20.6639 | 0.2417 | -711.9231  |
| LargeArteryStroke | MF0044 | Weighted mode             | 18 | -0.0272 | 0.0207 | 0.2057 | -0.0081 | 0.0062 | 0.2072 | 20.6639 | 0.2417 | -711.9231  |
| LargeArteryStroke | MF0045 | MR Egger                  | 18 | -0.0088 | 0.0306 | 0.7784 | -0.0002 | 0.0075 | 0.9793 | 14.9402 | 0.5290 | -502.1662  |
| LargeArteryStroke | MF0045 | Weighted median           | 18 | -0.0076 | 0.0133 | 0.5661 | -0.0002 | 0.0075 | 0.9793 | 14.9402 | 0.5290 | -502.1662  |
| LargeArteryStroke | MF0045 | Inverse variance weighted | 18 | -0.0095 | 0.0100 | 0.3435 | -0.0002 | 0.0075 | 0.9793 | 14.9402 | 0.5290 | -502.1662  |
| LargeArteryStroke | MF0045 | Simple mode               | 18 | -0.0122 | 0.0232 | 0.6039 | -0.0002 | 0.0075 | 0.9793 | 14.9402 | 0.5290 | -502.1662  |
| LargeArteryStroke | MF0045 | Weighted mode             | 18 | -0.0096 | 0.0204 | 0.6429 | -0.0002 | 0.0075 | 0.9793 | 14.9402 | 0.5290 | -502.1662  |
| LargeArteryStroke | MF0046 | MR Egger                  | 18 | -0.0710 | 0.1145 | 0.5441 | 0.0245  | 0.0281 | 0.3949 | 16.8210 | 0.3973 | -162.5989  |
| LargeArteryStroke | MF0046 | Weighted median           | 18 | 0.0385  | 0.0525 | 0.4635 | 0.0245  | 0.0281 | 0.3949 | 16.8210 | 0.3973 | -162.5989  |
| LargeArteryStroke | MF0046 | Inverse variance weighted | 18 | 0.0236  | 0.0373 | 0.5276 | 0.0245  | 0.0281 | 0.3949 | 16.8210 | 0.3973 | -162.5989  |
| LargeArteryStroke | MF0046 | Simple mode               | 18 | 0.0981  | 0.0984 | 0.3327 | 0.0245  | 0.0281 | 0.3949 | 16.8210 | 0.3973 | -162.5989  |
| LargeArteryStroke | MF0046 | Weighted mode             | 18 | 0.0755  | 0.1000 | 0.4606 | 0.0245  | 0.0281 | 0.3949 | 16.8210 | 0.3973 | -162.5989  |
| LargeArteryStroke | MF0047 | MR Egger                  | 18 | 0.0202  | 0.0346 | 0.5681 | -0.0088 | 0.0085 | 0.3154 | 17.3597 | 0.4303 | -744.2611  |
| LargeArteryStroke | MF0047 | Weighted median           | 18 | -0.0160 | 0.0159 | 0.3120 | -0.0088 | 0.0085 | 0.3154 | 17.3597 | 0.4303 | -744.2611  |
| LargeArteryStroke | MF0047 | Inverse variance weighted | 18 | -0.0137 | 0.0114 | 0.2288 | -0.0088 | 0.0085 | 0.3154 | 17.3597 | 0.4303 | -744.2611  |
| LargeArteryStroke | MF0047 | Simple mode               | 18 | -0.0108 | 0.0260 | 0.6847 | -0.0088 | 0.0085 | 0.3154 | 17.3597 | 0.4303 | -744.2611  |
| LargeArteryStroke | MF0047 | Weighted mode             | 18 | -0.0124 | 0.0250 | 0.6266 | -0.0088 | 0.0085 | 0.3154 | 17.3597 | 0.4303 | -744.2611  |
| LargeArteryStroke | MF0048 | MR Egger                  | 18 | 0.0388  | 0.0226 | 0.1056 | -0.0067 | 0.0055 | 0.2435 | 7.1564  | 0.9814 | -1243.3243 |
| LargeArteryStroke | MF0048 | Weighted median           | 18 | 0.0151  | 0.0098 | 0.1230 | -0.0067 | 0.0055 | 0.2435 | 7.1564  | 0.9814 | -1243.3243 |
| LargeArteryStroke | MF0048 | Inverse variance weighted | 18 | 0.0129  | 0.0074 | 0.0819 | -0.0067 | 0.0055 | 0.2435 | 7.1564  | 0.9814 | -1243.3243 |
| LargeArteryStroke | MF0048 | Simple mode               | 18 | 0.0161  | 0.0153 | 0.3078 | -0.0067 | 0.0055 | 0.2435 | 7.1564  | 0.9814 | -1243.3243 |
| LargeArteryStroke | MF0048 | Weighted mode             | 18 | 0.0166  | 0.0153 | 0.2951 | -0.0067 | 0.0055 | 0.2435 | 7.1564  | 0.9814 | -1243.3243 |
| LargeArteryStroke | MF0049 | MR Egger                  | 18 | 0.0399  | 0.0244 | 0.1211 | -0.0101 | 0.0060 | 0.1109 | 15.4184 | 0.5654 | -1257.2772 |
| LargeArteryStroke | MF0049 | Weighted median           | 18 | 0.0047  | 0.0112 | 0.6766 | -0.0101 | 0.0060 | 0.1109 | 15.4184 | 0.5654 | -1257.2772 |
| LargeArteryStroke | MF0049 | Inverse variance weighted | 18 | 0.0011  | 0.0080 | 0.8953 | -0.0101 | 0.0060 | 0.1109 | 15.4184 | 0.5654 | -1257.2772 |
| LargeArteryStroke | MF0049 | Simple mode               | 18 | -0.0013 | 0.0180 | 0.9413 | -0.0101 | 0.0060 | 0.1109 | 15.4184 | 0.5654 | -1257.2772 |
| LargeArteryStroke | MF0049 | Weighted mode             | 18 | 0.0035  | 0.0175 | 0.8453 | -0.0101 | 0.0060 | 0.1109 | 15.4184 | 0.5654 | -1257.2772 |
| LargeArteryStroke | MF0050 | MR Egger                  | 18 | -0.0311 | 0.0351 | 0.3887 | 0.0080  | 0.0086 | 0.3673 | 20.2445 | 0.2094 | -735.7102  |
| LargeArteryStroke | MF0050 | Weighted median           | 18 | 0.0005  | 0.0150 | 0.9716 | 0.0080  | 0.0086 | 0.3673 | 20.2445 | 0.2094 | -735.7102  |
| LargeArteryStroke | MF0050 | Inverse variance weighted | 18 | -0.0003 | 0.0115 | 0.9766 | 0.0080  | 0.0086 | 0.3673 | 20.2445 | 0.2094 | -735.7102  |
| LargeArteryStroke | MF0050 | Simple mode               | 18 | 0.0016  | 0.0295 | 0.9571 | 0.0080  | 0.0086 | 0.3673 | 20.2445 | 0.2094 | -735.7102  |
| LargeArteryStroke | MF0050 | Weighted mode             | 18 | 0.0045  | 0.0297 | 0.8801 | 0.0080  | 0.0086 | 0.3673 | 20.2445 | 0.2094 | -735.7102  |
| LargeArteryStroke | MF0051 | MR Egger                  | 18 | -0.0345 | 0.0298 | 0.2639 | 0.0060  | 0.0073 | 0.4230 | 13.9007 | 0.6061 | -1006.8504 |
| LargeArteryStroke | MF0051 | Weighted median           | 18 | -0.0198 | 0.0138 | 0.1516 | 0.0060  | 0.0073 | 0.4230 | 13.9007 | 0.6061 | -1006.8504 |
| LargeArteryStroke | MF0051 | Inverse variance weighted | 18 | -0.0114 | 0.0098 | 0.2456 | 0.0060  | 0.0073 | 0.4230 | 13.9007 | 0.6061 | -1006.8504 |
| LargeArteryStroke | MF0051 | Simple mode               | 18 | -0.0246 | 0.0251 | 0.3409 | 0.0060  | 0.0073 | 0.4230 | 13.9007 | 0.6061 | -1006.8504 |
| LargeArteryStroke | MF0051 | Weighted mode             | 18 | -0.0269 | 0.0238 | 0.2742 | 0.0060  | 0.0073 | 0.4230 | 13.9007 | 0.6061 | -1006.8504 |
| LargeArteryStroke | MF0052 | MR Egger                  | 18 | 0.4387  | 0.3734 | 0.2573 | -0.1053 | 0.0916 | 0.2671 | 34.2824 | 0.0077 | -2.1052    |
| LargeArteryStroke | MF0052 | Weighted median           | 18 | -0.1033 | 0.1281 | 0.4203 | -0.1053 | 0.0916 | 0.2671 | 34.2824 | 0.0077 | -2.1052    |
| LargeArteryStroke | MF0052 | Inverse variance weighted | 18 | 0.0330  | 0.1238 | 0.7894 | -0.1053 | 0.0916 | 0.2671 | 34.2824 | 0.0077 | -2.1052    |
| LargeArteryStroke | MF0052 | Simple mode               | 18 | -0.1494 | 0.2407 | 0.5432 | -0.1053 | 0.0916 | 0.2671 | 34.2824 | 0.0077 | -2.1052    |
| LargeArteryStroke | MF0052 | Weighted mode             | 18 | -0.1109 | 0.2089 | 0.6023 | -0.1053 | 0.0916 | 0.2671 | 34.2824 | 0.0077 | -2.1052    |
| LargeArteryStroke | MF0054 | MR Egger                  | 18 | -0.0028 | 0.0302 | 0.9275 | 0.0003  | 0.0074 | 0.9680 | 12.8652 | 0.6826 | -1250.4780 |
| LargeArteryStroke | MF0054 | Weighted median           | 18 | -0.0017 | 0.0138 | 0.9035 | 0.0003  | 0.0074 | 0.9680 | 12.8652 | 0.6826 | -1250.4780 |
| LargeArteryStroke | MF0054 | Inverse variance weighted | 18 | -0.0016 | 0.0099 | 0.8697 | 0.0003  | 0.0074 | 0.9680 | 12.8652 | 0.6826 | -1250.4780 |

|                   |        |                           |    |         |        |        |         |        |        |         |        |            |
|-------------------|--------|---------------------------|----|---------|--------|--------|---------|--------|--------|---------|--------|------------|
| LargeArteryStroke | MF0054 | Simple mode               | 18 | -0.0220 | 0.0250 | 0.3919 | 0.0003  | 0.0074 | 0.9680 | 12.8652 | 0.6826 | -1250.4780 |
| LargeArteryStroke | MF0054 | Weighted mode             | 18 | -0.0211 | 0.0246 | 0.4040 | 0.0003  | 0.0074 | 0.9680 | 12.8652 | 0.6826 | -1250.4780 |
| LargeArteryStroke | MF0055 | MR Egger                  | 18 | 0.1091  | 0.0789 | 0.1858 | -0.0171 | 0.0194 | 0.3898 | 15.3659 | 0.4980 | -226.6994  |
| LargeArteryStroke | MF0055 | Weighted median           | 18 | 0.0032  | 0.0360 | 0.9297 | -0.0171 | 0.0194 | 0.3898 | 15.3659 | 0.4980 | -226.6994  |
| LargeArteryStroke | MF0055 | Inverse variance weighted | 18 | 0.0432  | 0.0259 | 0.0954 | -0.0171 | 0.0194 | 0.3898 | 15.3659 | 0.4980 | -226.6994  |
| LargeArteryStroke | MF0055 | Simple mode               | 18 | -0.0029 | 0.0720 | 0.9680 | -0.0171 | 0.0194 | 0.3898 | 15.3659 | 0.4980 | -226.6994  |
| LargeArteryStroke | MF0055 | Weighted mode             | 18 | -0.0077 | 0.0688 | 0.9122 | -0.0171 | 0.0194 | 0.3898 | 15.3659 | 0.4980 | -226.6994  |
| LargeArteryStroke | MF0056 | MR Egger                  | 18 | -0.1351 | 0.1198 | 0.2762 | 0.0414  | 0.0294 | 0.1779 | 26.1417 | 0.0719 | -127.5703  |
| LargeArteryStroke | MF0056 | Weighted median           | 18 | 0.0593  | 0.0489 | 0.2250 | 0.0414  | 0.0294 | 0.1779 | 26.1417 | 0.0719 | -127.5703  |
| LargeArteryStroke | MF0056 | Inverse variance weighted | 18 | 0.0244  | 0.0405 | 0.5464 | 0.0414  | 0.0294 | 0.1779 | 26.1417 | 0.0719 | -127.5703  |
| LargeArteryStroke | MF0056 | Simple mode               | 18 | 0.0899  | 0.0926 | 0.3454 | 0.0414  | 0.0294 | 0.1779 | 26.1417 | 0.0719 | -127.5703  |
| LargeArteryStroke | MF0056 | Weighted mode             | 18 | 0.0794  | 0.0787 | 0.3275 | 0.0414  | 0.0294 | 0.1779 | 26.1417 | 0.0719 | -127.5703  |
| LargeArteryStroke | MF0057 | MR Egger                  | 18 | -0.1628 | 0.1338 | 0.2412 | 0.0696  | 0.0328 | 0.0500 | 17.2331 | 0.4387 | -93.7076   |
| LargeArteryStroke | MF0057 | Weighted median           | 18 | 0.0212  | 0.0608 | 0.7271 | 0.0696  | 0.0328 | 0.0500 | 17.2331 | 0.4387 | -93.7076   |
| LargeArteryStroke | MF0057 | Inverse variance weighted | 18 | 0.1051  | 0.0442 | 0.0175 | 0.0696  | 0.0328 | 0.0500 | 17.2331 | 0.4387 | -93.7076   |
| LargeArteryStroke | MF0057 | Simple mode               | 18 | 0.0045  | 0.0988 | 0.9645 | 0.0696  | 0.0328 | 0.0500 | 17.2331 | 0.4387 | -93.7076   |
| LargeArteryStroke | MF0057 | Weighted mode             | 18 | 0.0021  | 0.0897 | 0.9813 | 0.0696  | 0.0328 | 0.0500 | 17.2331 | 0.4387 | -93.7076   |
| LargeArteryStroke | MF0058 | MR Egger                  | 18 | 0.1164  | 0.0806 | 0.1680 | -0.0163 | 0.0198 | 0.4209 | 10.3382 | 0.8484 | -274.7799  |
| LargeArteryStroke | MF0058 | Weighted median           | 18 | 0.0438  | 0.0352 | 0.2131 | -0.0163 | 0.0198 | 0.4209 | 10.3382 | 0.8484 | -274.7799  |
| LargeArteryStroke | MF0058 | Inverse variance weighted | 18 | 0.0535  | 0.0265 | 0.0432 | -0.0163 | 0.0198 | 0.4209 | 10.3382 | 0.8484 | -274.7799  |
| LargeArteryStroke | MF0058 | Simple mode               | 18 | 0.0381  | 0.0671 | 0.5775 | -0.0163 | 0.0198 | 0.4209 | 10.3382 | 0.8484 | -274.7799  |
| LargeArteryStroke | MF0058 | Weighted mode             | 18 | 0.0371  | 0.0637 | 0.5680 | -0.0163 | 0.0198 | 0.4209 | 10.3382 | 0.8484 | -274.7799  |
| LargeArteryStroke | MF0059 | MR Egger                  | 18 | 0.2533  | 0.2362 | 0.2994 | -0.0670 | 0.0579 | 0.2646 | 30.5810 | 0.0224 | -16.1643   |
| LargeArteryStroke | MF0059 | Weighted median           | 18 | 0.0108  | 0.0888 | 0.9029 | -0.0670 | 0.0579 | 0.2646 | 30.5810 | 0.0224 | -16.1643   |
| LargeArteryStroke | MF0059 | Inverse variance weighted | 18 | -0.0046 | 0.0783 | 0.9533 | -0.0670 | 0.0579 | 0.2646 | 30.5810 | 0.0224 | -16.1643   |
| LargeArteryStroke | MF0059 | Simple mode               | 18 | -0.0426 | 0.1496 | 0.7793 | -0.0670 | 0.0579 | 0.2646 | 30.5810 | 0.0224 | -16.1643   |
| LargeArteryStroke | MF0059 | Weighted mode             | 18 | -0.0145 | 0.1320 | 0.9135 | -0.0670 | 0.0579 | 0.2646 | 30.5810 | 0.0224 | -16.1643   |
| LargeArteryStroke | MF0060 | MR Egger                  | 18 | 0.1198  | 0.0833 | 0.1695 | -0.0252 | 0.0204 | 0.2358 | 11.8572 | 0.8087 | -213.0333  |
| LargeArteryStroke | MF0060 | Weighted median           | 18 | 0.0443  | 0.0385 | 0.2496 | -0.0252 | 0.0204 | 0.2358 | 11.8572 | 0.8087 | -213.0333  |
| LargeArteryStroke | MF0060 | Inverse variance weighted | 18 | 0.0229  | 0.0273 | 0.4019 | -0.0252 | 0.0204 | 0.2358 | 11.8572 | 0.8087 | -213.0333  |
| LargeArteryStroke | MF0060 | Simple mode               | 18 | 0.0510  | 0.0656 | 0.4473 | -0.0252 | 0.0204 | 0.2358 | 11.8572 | 0.8087 | -213.0333  |
| LargeArteryStroke | MF0060 | Weighted mode             | 18 | 0.0570  | 0.0593 | 0.3501 | -0.0252 | 0.0204 | 0.2358 | 11.8572 | 0.8087 | -213.0333  |
| LargeArteryStroke | MF0061 | MR Egger                  | 18 | 0.0420  | 0.0769 | 0.5926 | -0.0024 | 0.0189 | 0.8984 | 22.7918 | 0.1194 | -343.0410  |
| LargeArteryStroke | MF0061 | Weighted median           | 18 | 0.0212  | 0.0315 | 0.5008 | -0.0024 | 0.0189 | 0.8984 | 22.7918 | 0.1194 | -343.0410  |
| LargeArteryStroke | MF0061 | Inverse variance weighted | 18 | 0.0326  | 0.0245 | 0.1840 | -0.0024 | 0.0189 | 0.8984 | 22.7918 | 0.1194 | -343.0410  |
| LargeArteryStroke | MF0061 | Simple mode               | 18 | 0.0203  | 0.0504 | 0.6926 | -0.0024 | 0.0189 | 0.8984 | 22.7918 | 0.1194 | -343.0410  |
| LargeArteryStroke | MF0061 | Weighted mode             | 18 | 0.0190  | 0.0551 | 0.7347 | -0.0024 | 0.0189 | 0.8984 | 22.7918 | 0.1194 | -343.0410  |
| LargeArteryStroke | MF0062 | MR Egger                  | 18 | 0.1712  | 0.1238 | 0.1857 | -0.0297 | 0.0304 | 0.3429 | 5.0479  | 0.9976 | -168.0496  |
| LargeArteryStroke | MF0062 | Weighted median           | 18 | 0.0675  | 0.0520 | 0.1939 | -0.0297 | 0.0304 | 0.3429 | 5.0479  | 0.9976 | -168.0496  |
| LargeArteryStroke | MF0062 | Inverse variance weighted | 18 | 0.0569  | 0.0406 | 0.1616 | -0.0297 | 0.0304 | 0.3429 | 5.0479  | 0.9976 | -168.0496  |
| LargeArteryStroke | MF0062 | Simple mode               | 18 | 0.0706  | 0.0920 | 0.4534 | -0.0297 | 0.0304 | 0.3429 | 5.0479  | 0.9976 | -168.0496  |
| LargeArteryStroke | MF0062 | Weighted mode             | 18 | 0.0897  | 0.0845 | 0.3035 | -0.0297 | 0.0304 | 0.3429 | 5.0479  | 0.9976 | -168.0496  |
| LargeArteryStroke | MF0063 | MR Egger                  | 18 | -0.0192 | 0.0259 | 0.4702 | 0.0014  | 0.0064 | 0.8241 | 15.7030 | 0.4739 | -711.9400  |
| LargeArteryStroke | MF0063 | Weighted median           | 18 | -0.0044 | 0.0120 | 0.7140 | 0.0014  | 0.0064 | 0.8241 | 15.7030 | 0.4739 | -711.9400  |
| LargeArteryStroke | MF0063 | Inverse variance weighted | 18 | -0.0136 | 0.0085 | 0.1091 | 0.0014  | 0.0064 | 0.8241 | 15.7030 | 0.4739 | -711.9400  |
| LargeArteryStroke | MF0063 | Simple mode               | 18 | -0.0031 | 0.0214 | 0.8861 | 0.0014  | 0.0064 | 0.8241 | 15.7030 | 0.4739 | -711.9400  |
| LargeArteryStroke | MF0063 | Weighted mode             | 18 | -0.0017 | 0.0189 | 0.9285 | 0.0014  | 0.0064 | 0.8241 | 15.7030 | 0.4739 | -711.9400  |
| LargeArteryStroke | MF0064 | MR Egger                  | 18 | 0.0166  | 0.1461 | 0.9109 | -0.0002 | 0.0358 | 0.9963 | 24.4037 | 0.0811 | -136.1116  |
| LargeArteryStroke | MF0064 | Weighted median           | 18 | 0.0632  | 0.0562 | 0.2602 | -0.0002 | 0.0358 | 0.9963 | 24.4037 | 0.0811 | -136.1116  |
| LargeArteryStroke | MF0064 | Inverse variance weighted | 18 | 0.0160  | 0.0466 | 0.7317 | -0.0002 | 0.0358 | 0.9963 | 24.4037 | 0.0811 | -136.1116  |
| LargeArteryStroke | MF0064 | Simple mode               | 18 | 0.0965  | 0.1153 | 0.4145 | -0.0002 | 0.0358 | 0.9963 | 24.4037 | 0.0811 | -136.1116  |
| LargeArteryStroke | MF0064 | Weighted mode             | 18 | 0.0915  | 0.1088 | 0.4118 | -0.0002 | 0.0358 | 0.9963 | 24.4037 | 0.0811 | -136.1116  |
| LargeArteryStroke | MF0065 | MR Egger                  | 18 | -0.0017 | 0.0222 | 0.9404 | 0.0027  | 0.0054 | 0.6311 | 12.5949 | 0.7021 | -1209.5428 |
| LargeArteryStroke | MF0065 | Weighted median           | 18 | 0.0148  | 0.0101 | 0.1423 | 0.0027  | 0.0054 | 0.6311 | 12.5949 | 0.7021 | -1209.5428 |
| LargeArteryStroke | MF0065 | Inverse variance weighted | 18 | 0.0086  | 0.0073 | 0.2394 | 0.0027  | 0.0054 | 0.6311 | 12.5949 | 0.7021 | -1209.5428 |
| LargeArteryStroke | MF0065 | Simple mode               | 18 | 0.0171  | 0.0177 | 0.3485 | 0.0027  | 0.0054 | 0.6311 | 12.5949 | 0.7021 | -1209.5428 |
| LargeArteryStroke | MF0065 | Weighted mode             | 18 | 0.0178  | 0.0187 | 0.3540 | 0.0027  | 0.0054 | 0.6311 | 12.5949 | 0.7021 | -1209.5428 |
| LargeArteryStroke | MF0066 | MR Egger                  | 18 | -0.0107 | 0.0760 | 0.8899 | 0.0036  | 0.0186 | 0.8504 | 15.4205 | 0.4941 | -217.0949  |
| LargeArteryStroke | MF0066 | Weighted median           | 18 | 0.0174  | 0.0361 | 0.6302 | 0.0036  | 0.0186 | 0.8504 | 15.4205 | 0.4941 | -217.0949  |
| LargeArteryStroke | MF0066 | Inverse variance weighted | 18 | 0.0031  | 0.0249 | 0.9020 | 0.0036  | 0.0186 | 0.8504 | 15.4205 | 0.4941 | -217.0949  |
| LargeArteryStroke | MF0066 | Simple mode               | 18 | 0.0357  | 0.0630 | 0.5780 | 0.0036  | 0.0186 | 0.8504 | 15.4205 | 0.4941 | -217.0949  |

|                   |        |                           |    |         |        |        |         |        |        |         |        |            |
|-------------------|--------|---------------------------|----|---------|--------|--------|---------|--------|--------|---------|--------|------------|
| LargeArteryStroke | MF0066 | Weighted mode             | 18 | 0.0372  | 0.0637 | 0.5666 | 0.0036  | 0.0186 | 0.8504 | 15.4205 | 0.4941 | -217.0949  |
| LargeArteryStroke | MF0067 | MR Egger                  | 18 | 0.0353  | 0.0205 | 0.1046 | -0.0057 | 0.0050 | 0.2754 | 10.1338 | 0.8979 | -1244.0170 |
| LargeArteryStroke | MF0067 | Weighted median           | 18 | 0.0125  | 0.0090 | 0.1642 | -0.0057 | 0.0050 | 0.2754 | 10.1338 | 0.8979 | -1244.0170 |
| LargeArteryStroke | MF0067 | Inverse variance weighted | 18 | 0.0134  | 0.0067 | 0.0465 | -0.0057 | 0.0050 | 0.2754 | 10.1338 | 0.8979 | -1244.0170 |
| LargeArteryStroke | MF0067 | Simple mode               | 18 | 0.0125  | 0.0143 | 0.3941 | -0.0057 | 0.0050 | 0.2754 | 10.1338 | 0.8979 | -1244.0170 |
| LargeArteryStroke | MF0067 | Weighted mode             | 18 | 0.0101  | 0.0150 | 0.5088 | -0.0057 | 0.0050 | 0.2754 | 10.1338 | 0.8979 | -1244.0170 |
| LargeArteryStroke | MF0068 | MR Egger                  | 18 | 0.0374  | 0.0195 | 0.0730 | -0.0089 | 0.0048 | 0.0814 | 21.0673 | 0.2233 | -1016.4162 |
| LargeArteryStroke | MF0068 | Weighted median           | 18 | 0.0075  | 0.0086 | 0.3855 | -0.0089 | 0.0048 | 0.0814 | 21.0673 | 0.2233 | -1016.4162 |
| LargeArteryStroke | MF0068 | Inverse variance weighted | 18 | 0.0032  | 0.0069 | 0.6440 | -0.0089 | 0.0048 | 0.0814 | 21.0673 | 0.2233 | -1016.4162 |
| LargeArteryStroke | MF0068 | Simple mode               | 18 | 0.0172  | 0.0171 | 0.3284 | -0.0089 | 0.0048 | 0.0814 | 21.0673 | 0.2233 | -1016.4162 |
| LargeArteryStroke | MF0068 | Weighted mode             | 18 | 0.0168  | 0.0136 | 0.2327 | -0.0089 | 0.0048 | 0.0814 | 21.0673 | 0.2233 | -1016.4162 |
| LargeArteryStroke | MF0069 | MR Egger                  | 18 | 0.0528  | 0.1167 | 0.6567 | -0.0207 | 0.0286 | 0.4794 | 20.7265 | 0.1893 | -100.8290  |
| LargeArteryStroke | MF0069 | Weighted median           | 18 | -0.0523 | 0.0491 | 0.2866 | -0.0207 | 0.0286 | 0.4794 | 20.7265 | 0.1893 | -100.8290  |
| LargeArteryStroke | MF0069 | Inverse variance weighted | 18 | -0.0270 | 0.0378 | 0.4751 | -0.0207 | 0.0286 | 0.4794 | 20.7265 | 0.1893 | -100.8290  |
| LargeArteryStroke | MF0069 | Simple mode               | 18 | -0.0729 | 0.0847 | 0.4015 | -0.0207 | 0.0286 | 0.4794 | 20.7265 | 0.1893 | -100.8290  |
| LargeArteryStroke | MF0069 | Weighted mode             | 18 | -0.0655 | 0.0783 | 0.4143 | -0.0207 | 0.0286 | 0.4794 | 20.7265 | 0.1893 | -100.8290  |
| LargeArteryStroke | MF0070 | MR Egger                  | 18 | -0.0411 | 0.1308 | 0.7576 | 0.0184  | 0.0321 | 0.5749 | 18.1620 | 0.3145 | -104.1536  |
| LargeArteryStroke | MF0070 | Weighted median           | 18 | 0.0661  | 0.0584 | 0.2579 | 0.0184  | 0.0321 | 0.5749 | 18.1620 | 0.3145 | -104.1536  |
| LargeArteryStroke | MF0070 | Inverse variance weighted | 18 | 0.0297  | 0.0421 | 0.4810 | 0.0184  | 0.0321 | 0.5749 | 18.1620 | 0.3145 | -104.1536  |
| LargeArteryStroke | MF0070 | Simple mode               | 18 | 0.0729  | 0.1034 | 0.4904 | 0.0184  | 0.0321 | 0.5749 | 18.1620 | 0.3145 | -104.1536  |
| LargeArteryStroke | MF0070 | Weighted mode             | 18 | 0.0666  | 0.1042 | 0.5312 | 0.0184  | 0.0321 | 0.5749 | 18.1620 | 0.3145 | -104.1536  |
| LargeArteryStroke | MF0071 | MR Egger                  | 18 | 0.0062  | 0.0156 | 0.6953 | 0.0000  | 0.0038 | 0.9901 | 8.1227  | 0.9451 | -2431.0595 |
| LargeArteryStroke | MF0071 | Weighted median           | 18 | 0.0038  | 0.0066 | 0.5624 | 0.0000  | 0.0038 | 0.9901 | 8.1227  | 0.9451 | -2431.0595 |
| LargeArteryStroke | MF0071 | Inverse variance weighted | 18 | 0.0064  | 0.0051 | 0.2110 | 0.0000  | 0.0038 | 0.9901 | 8.1227  | 0.9451 | -2431.0595 |
| LargeArteryStroke | MF0071 | Simple mode               | 18 | 0.0025  | 0.0110 | 0.8222 | 0.0000  | 0.0038 | 0.9901 | 8.1227  | 0.9451 | -2431.0595 |
| LargeArteryStroke | MF0071 | Weighted mode             | 18 | 0.0025  | 0.0110 | 0.8224 | 0.0000  | 0.0038 | 0.9901 | 8.1227  | 0.9451 | -2431.0595 |
| LargeArteryStroke | MF0072 | MR Egger                  | 18 | 0.0823  | 0.1517 | 0.5950 | -0.0052 | 0.0372 | 0.8895 | 26.4557 | 0.0479 | -63.3629   |
| LargeArteryStroke | MF0072 | Weighted median           | 18 | 0.1223  | 0.0556 | 0.0278 | -0.0052 | 0.0372 | 0.8895 | 26.4557 | 0.0479 | -63.3629   |
| LargeArteryStroke | MF0072 | Inverse variance weighted | 18 | 0.0620  | 0.0483 | 0.1994 | -0.0052 | 0.0372 | 0.8895 | 26.4557 | 0.0479 | -63.3629   |
| LargeArteryStroke | MF0072 | Simple mode               | 18 | 0.1445  | 0.1067 | 0.1935 | -0.0052 | 0.0372 | 0.8895 | 26.4557 | 0.0479 | -63.3629   |
| LargeArteryStroke | MF0072 | Weighted mode             | 18 | 0.1474  | 0.0883 | 0.1135 | -0.0052 | 0.0372 | 0.8895 | 26.4557 | 0.0479 | -63.3629   |
| LargeArteryStroke | MF0073 | MR Egger                  | 18 | 0.0468  | 0.0241 | 0.0697 | -0.0098 | 0.0059 | 0.1146 | 14.1885 | 0.6537 | -1148.2970 |
| LargeArteryStroke | MF0073 | Weighted median           | 18 | 0.0112  | 0.0109 | 0.3047 | -0.0098 | 0.0059 | 0.1146 | 14.1885 | 0.6537 | -1148.2970 |
| LargeArteryStroke | MF0073 | Inverse variance weighted | 18 | 0.0089  | 0.0079 | 0.2626 | -0.0098 | 0.0059 | 0.1146 | 14.1885 | 0.6537 | -1148.2970 |
| LargeArteryStroke | MF0073 | Simple mode               | 18 | 0.0282  | 0.0206 | 0.1889 | -0.0098 | 0.0059 | 0.1146 | 14.1885 | 0.6537 | -1148.2970 |
| LargeArteryStroke | MF0073 | Weighted mode             | 18 | 0.0270  | 0.0194 | 0.1835 | -0.0098 | 0.0059 | 0.1146 | 14.1885 | 0.6537 | -1148.2970 |
| LargeArteryStroke | MF0074 | MR Egger                  | 18 | 0.0130  | 0.0246 | 0.6042 | -0.0045 | 0.0060 | 0.4657 | 10.2718 | 0.8521 | -1157.4867 |
| LargeArteryStroke | MF0074 | Weighted median           | 18 | 0.0004  | 0.0108 | 0.9714 | -0.0045 | 0.0060 | 0.4657 | 10.2718 | 0.8521 | -1157.4867 |
| LargeArteryStroke | MF0074 | Inverse variance weighted | 18 | -0.0044 | 0.0081 | 0.5895 | -0.0045 | 0.0060 | 0.4657 | 10.2718 | 0.8521 | -1157.4867 |
| LargeArteryStroke | MF0074 | Simple mode               | 18 | 0.0038  | 0.0195 | 0.8472 | -0.0045 | 0.0060 | 0.4657 | 10.2718 | 0.8521 | -1157.4867 |
| LargeArteryStroke | MF0074 | Weighted mode             | 18 | 0.0009  | 0.0175 | 0.9597 | -0.0045 | 0.0060 | 0.4657 | 10.2718 | 0.8521 | -1157.4867 |
| LargeArteryStroke | MF0075 | MR Egger                  | 18 | -0.0256 | 0.0371 | 0.4992 | 0.0029  | 0.0091 | 0.7543 | 14.3517 | 0.5725 | -488.2047  |
| LargeArteryStroke | MF0075 | Weighted median           | 18 | -0.0122 | 0.0177 | 0.4928 | 0.0029  | 0.0091 | 0.7543 | 14.3517 | 0.5725 | -488.2047  |
| LargeArteryStroke | MF0075 | Inverse variance weighted | 18 | -0.0145 | 0.0122 | 0.2341 | 0.0029  | 0.0091 | 0.7543 | 14.3517 | 0.5725 | -488.2047  |
| LargeArteryStroke | MF0075 | Simple mode               | 18 | -0.0060 | 0.0313 | 0.8491 | 0.0029  | 0.0091 | 0.7543 | 14.3517 | 0.5725 | -488.2047  |
| LargeArteryStroke | MF0075 | Weighted mode             | 18 | -0.0060 | 0.0324 | 0.8544 | 0.0029  | 0.0091 | 0.7543 | 14.3517 | 0.5725 | -488.2047  |
| LargeArteryStroke | MF0076 | MR Egger                  | 18 | 0.0204  | 0.1267 | 0.8738 | 0.0065  | 0.0311 | 0.8380 | 23.2400 | 0.1075 | -83.1647   |
| LargeArteryStroke | MF0076 | Weighted median           | 18 | 0.0414  | 0.0501 | 0.4082 | 0.0065  | 0.0311 | 0.8380 | 23.2400 | 0.1075 | -83.1647   |
| LargeArteryStroke | MF0076 | Inverse variance weighted | 18 | 0.0453  | 0.0404 | 0.2621 | 0.0065  | 0.0311 | 0.8380 | 23.2400 | 0.1075 | -83.1647   |
| LargeArteryStroke | MF0076 | Simple mode               | 18 | 0.0253  | 0.0850 | 0.7698 | 0.0065  | 0.0311 | 0.8380 | 23.2400 | 0.1075 | -83.1647   |
| LargeArteryStroke | MF0076 | Weighted mode             | 18 | 0.0301  | 0.0852 | 0.7280 | 0.0065  | 0.0311 | 0.8380 | 23.2400 | 0.1075 | -83.1647   |
| LargeArteryStroke | MF0077 | MR Egger                  | 18 | 0.1011  | 0.0738 | 0.1895 | -0.0216 | 0.0181 | 0.2505 | 16.0443 | 0.5207 | -276.8071  |
| LargeArteryStroke | MF0077 | Weighted median           | 18 | 0.0178  | 0.0338 | 0.5987 | -0.0216 | 0.0181 | 0.2505 | 16.0443 | 0.5207 | -276.8071  |
| LargeArteryStroke | MF0077 | Inverse variance weighted | 18 | 0.0180  | 0.0242 | 0.4573 | -0.0216 | 0.0181 | 0.2505 | 16.0443 | 0.5207 | -276.8071  |
| LargeArteryStroke | MF0077 | Simple mode               | 18 | -0.0584 | 0.0597 | 0.3423 | -0.0216 | 0.0181 | 0.2505 | 16.0443 | 0.5207 | -276.8071  |
| LargeArteryStroke | MF0077 | Weighted mode             | 18 | -0.0519 | 0.0613 | 0.4092 | -0.0216 | 0.0181 | 0.2505 | 16.0443 | 0.5207 | -276.8071  |
| LargeArteryStroke | MF0078 | MR Egger                  | 18 | 0.0269  | 0.0660 | 0.6895 | -0.0043 | 0.0162 | 0.7959 | 18.5945 | 0.2902 | -352.9499  |
| LargeArteryStroke | MF0078 | Weighted median           | 18 | 0.0150  | 0.0284 | 0.5966 | -0.0043 | 0.0162 | 0.7959 | 18.5945 | 0.2902 | -352.9499  |
| LargeArteryStroke | MF0078 | Inverse variance weighted | 18 | 0.0105  | 0.0211 | 0.6197 | -0.0043 | 0.0162 | 0.7959 | 18.5945 | 0.2902 | -352.9499  |
| LargeArteryStroke | MF0078 | Simple mode               | 18 | -0.0326 | 0.0560 | 0.5675 | -0.0043 | 0.0162 | 0.7959 | 18.5945 | 0.2902 | -352.9499  |
| LargeArteryStroke | MF0078 | Weighted mode             | 18 | -0.0338 | 0.0530 | 0.5319 | -0.0043 | 0.0162 | 0.7959 | 18.5945 | 0.2902 | -352.9499  |

|                   |        |                           |    |         |        |        |         |        |        |         |        |            |
|-------------------|--------|---------------------------|----|---------|--------|--------|---------|--------|--------|---------|--------|------------|
| LargeArteryStroke | MF0079 | MR Egger                  | 18 | -0.0506 | 0.1447 | 0.7309 | 0.0156  | 0.0355 | 0.6670 | 24.6357 | 0.0765 | -42.2110   |
| LargeArteryStroke | MF0079 | Weighted median           | 18 | -0.0314 | 0.0543 | 0.5639 | 0.0156  | 0.0355 | 0.6670 | 24.6357 | 0.0765 | -42.2110   |
| LargeArteryStroke | MF0079 | Inverse variance weighted | 18 | 0.0093  | 0.0464 | 0.8416 | 0.0156  | 0.0355 | 0.6670 | 24.6357 | 0.0765 | -42.2110   |
| LargeArteryStroke | MF0079 | Simple mode               | 18 | -0.0681 | 0.0984 | 0.4980 | 0.0156  | 0.0355 | 0.6670 | 24.6357 | 0.0765 | -42.2110   |
| LargeArteryStroke | MF0079 | Weighted mode             | 18 | -0.0779 | 0.0982 | 0.4385 | 0.0156  | 0.0355 | 0.6670 | 24.6357 | 0.0765 | -42.2110   |
| LargeArteryStroke | MF0080 | MR Egger                  | 18 | 0.0533  | 0.0879 | 0.5532 | -0.0088 | 0.0216 | 0.6901 | 12.0817 | 0.7383 | -236.8570  |
| LargeArteryStroke | MF0080 | Weighted median           | 18 | 0.0304  | 0.0403 | 0.4509 | -0.0088 | 0.0216 | 0.6901 | 12.0817 | 0.7383 | -236.8570  |
| LargeArteryStroke | MF0080 | Inverse variance weighted | 18 | 0.0195  | 0.0289 | 0.4985 | -0.0088 | 0.0216 | 0.6901 | 12.0817 | 0.7383 | -236.8570  |
| LargeArteryStroke | MF0080 | Simple mode               | 18 | 0.0505  | 0.0688 | 0.4735 | -0.0088 | 0.0216 | 0.6901 | 12.0817 | 0.7383 | -236.8570  |
| LargeArteryStroke | MF0080 | Weighted mode             | 18 | 0.0505  | 0.0610 | 0.4194 | -0.0088 | 0.0216 | 0.6901 | 12.0817 | 0.7383 | -236.8570  |
| LargeArteryStroke | MF0081 | MR Egger                  | 18 | 0.3439  | 0.1945 | 0.0961 | -0.0691 | 0.0477 | 0.1672 | 12.2596 | 0.7842 | -23.4432   |
| LargeArteryStroke | MF0081 | Weighted median           | 18 | -0.0296 | 0.0890 | 0.7392 | -0.0691 | 0.0477 | 0.1672 | 12.2596 | 0.7842 | -23.4432   |
| LargeArteryStroke | MF0081 | Inverse variance weighted | 18 | 0.0780  | 0.0639 | 0.2221 | -0.0691 | 0.0477 | 0.1672 | 12.2596 | 0.7842 | -23.4432   |
| LargeArteryStroke | MF0081 | Simple mode               | 18 | -0.0436 | 0.1359 | 0.7520 | -0.0691 | 0.0477 | 0.1672 | 12.2596 | 0.7842 | -23.4432   |
| LargeArteryStroke | MF0081 | Weighted mode             | 18 | -0.0523 | 0.1299 | 0.6923 | -0.0691 | 0.0477 | 0.1672 | 12.2596 | 0.7842 | -23.4432   |
| LargeArteryStroke | MF0082 | MR Egger                  | 18 | 0.2842  | 0.1890 | 0.1521 | -0.0644 | 0.0464 | 0.1838 | 28.5491 | 0.0389 | -44.8590   |
| LargeArteryStroke | MF0082 | Weighted median           | 18 | 0.0412  | 0.0729 | 0.5721 | -0.0644 | 0.0464 | 0.1838 | 28.5491 | 0.0389 | -44.8590   |
| LargeArteryStroke | MF0082 | Inverse variance weighted | 18 | 0.0362  | 0.0637 | 0.5695 | -0.0644 | 0.0464 | 0.1838 | 28.5491 | 0.0389 | -44.8590   |
| LargeArteryStroke | MF0082 | Simple mode               | 18 | -0.1127 | 0.1455 | 0.4493 | -0.0644 | 0.0464 | 0.1838 | 28.5491 | 0.0389 | -44.8590   |
| LargeArteryStroke | MF0082 | Weighted mode             | 18 | 0.1354  | 0.1221 | 0.2828 | -0.0644 | 0.0464 | 0.1838 | 28.5491 | 0.0389 | -44.8590   |
| LargeArteryStroke | MF0083 | MR Egger                  | 18 | -0.0050 | 0.1978 | 0.9801 | 0.0008  | 0.0485 | 0.9867 | 26.4256 | 0.0483 | -30.3771   |
| LargeArteryStroke | MF0083 | Weighted median           | 18 | -0.0103 | 0.0767 | 0.8933 | 0.0008  | 0.0485 | 0.9867 | 26.4256 | 0.0483 | -30.3771   |
| LargeArteryStroke | MF0083 | Inverse variance weighted | 18 | -0.0019 | 0.0630 | 0.9766 | 0.0008  | 0.0485 | 0.9867 | 26.4256 | 0.0483 | -30.3771   |
| LargeArteryStroke | MF0083 | Simple mode               | 18 | 0.0009  | 0.1382 | 0.9951 | 0.0008  | 0.0485 | 0.9867 | 26.4256 | 0.0483 | -30.3771   |
| LargeArteryStroke | MF0083 | Weighted mode             | 18 | 0.0095  | 0.1363 | 0.9454 | 0.0008  | 0.0485 | 0.9867 | 26.4256 | 0.0483 | -30.3771   |
| LargeArteryStroke | MF0084 | MR Egger                  | 18 | 0.6214  | 0.3403 | 0.0866 | -0.1408 | 0.0835 | 0.1111 | 25.3896 | 0.0863 | -5.9253    |
| LargeArteryStroke | MF0084 | Weighted median           | 18 | -0.1024 | 0.1433 | 0.4750 | -0.1408 | 0.0835 | 0.1111 | 25.3896 | 0.0863 | -5.9253    |
| LargeArteryStroke | MF0084 | Inverse variance weighted | 18 | 0.0793  | 0.1177 | 0.5004 | -0.1408 | 0.0835 | 0.1111 | 25.3896 | 0.0863 | -5.9253    |
| LargeArteryStroke | MF0084 | Simple mode               | 18 | -0.2530 | 0.2678 | 0.3581 | -0.1408 | 0.0835 | 0.1111 | 25.3896 | 0.0863 | -5.9253    |
| LargeArteryStroke | MF0084 | Weighted mode             | 18 | -0.2115 | 0.2521 | 0.4130 | -0.1408 | 0.0835 | 0.1111 | 25.3896 | 0.0863 | -5.9253    |
| LargeArteryStroke | MF0085 | MR Egger                  | 18 | 0.1241  | 0.1207 | 0.3192 | -0.0240 | 0.0296 | 0.4292 | 14.2395 | 0.5809 | -101.0771  |
| LargeArteryStroke | MF0085 | Weighted median           | 18 | 0.0303  | 0.0544 | 0.5775 | -0.0240 | 0.0296 | 0.4292 | 14.2395 | 0.5809 | -101.0771  |
| LargeArteryStroke | MF0085 | Inverse variance weighted | 18 | 0.0316  | 0.0396 | 0.4249 | -0.0240 | 0.0296 | 0.4292 | 14.2395 | 0.5809 | -101.0771  |
| LargeArteryStroke | MF0085 | Simple mode               | 18 | 0.0240  | 0.1061 | 0.8236 | -0.0240 | 0.0296 | 0.4292 | 14.2395 | 0.5809 | -101.0771  |
| LargeArteryStroke | MF0085 | Weighted mode             | 18 | 0.0323  | 0.0966 | 0.7426 | -0.0240 | 0.0296 | 0.4292 | 14.2395 | 0.5809 | -101.0771  |
| LargeArteryStroke | MF0086 | MR Egger                  | 18 | 0.0033  | 0.0187 | 0.8643 | 0.0011  | 0.0046 | 0.8216 | 11.2829 | 0.7917 | -1780.0457 |
| LargeArteryStroke | MF0086 | Weighted median           | 18 | 0.0080  | 0.0080 | 0.3183 | 0.0011  | 0.0046 | 0.8216 | 11.2829 | 0.7917 | -1780.0457 |
| LargeArteryStroke | MF0086 | Inverse variance weighted | 18 | 0.0073  | 0.0061 | 0.2346 | 0.0011  | 0.0046 | 0.8216 | 11.2829 | 0.7917 | -1780.0457 |
| LargeArteryStroke | MF0086 | Simple mode               | 18 | 0.0089  | 0.0145 | 0.5478 | 0.0011  | 0.0046 | 0.8216 | 11.2829 | 0.7917 | -1780.0457 |
| LargeArteryStroke | MF0086 | Weighted mode             | 18 | 0.0086  | 0.0138 | 0.5394 | 0.0011  | 0.0046 | 0.8216 | 11.2829 | 0.7917 | -1780.0457 |
| LargeArteryStroke | MF0087 | MR Egger                  | 18 | 0.1341  | 0.0717 | 0.0800 | -0.0226 | 0.0176 | 0.2164 | 12.1013 | 0.7940 | -249.3756  |
| LargeArteryStroke | MF0087 | Weighted median           | 18 | 0.0614  | 0.0317 | 0.0529 | -0.0226 | 0.0176 | 0.2164 | 12.1013 | 0.7940 | -249.3756  |
| LargeArteryStroke | MF0087 | Inverse variance weighted | 18 | 0.0469  | 0.0236 | 0.0465 | -0.0226 | 0.0176 | 0.2164 | 12.1013 | 0.7940 | -249.3756  |
| LargeArteryStroke | MF0087 | Simple mode               | 18 | 0.0806  | 0.0527 | 0.1447 | -0.0226 | 0.0176 | 0.2164 | 12.1013 | 0.7940 | -249.3756  |
| LargeArteryStroke | MF0087 | Weighted mode             | 18 | 0.0794  | 0.0497 | 0.1288 | -0.0226 | 0.0176 | 0.2164 | 12.1013 | 0.7940 | -249.3756  |
| LargeArteryStroke | MF0088 | MR Egger                  | 18 | -0.0287 | 0.0728 | 0.6991 | 0.0073  | 0.0179 | 0.6869 | 24.2254 | 0.0847 | -340.5013  |
| LargeArteryStroke | MF0088 | Weighted median           | 18 | 0.0041  | 0.0304 | 0.8929 | 0.0073  | 0.0179 | 0.6869 | 24.2254 | 0.0847 | -340.5013  |
| LargeArteryStroke | MF0088 | Inverse variance weighted | 18 | -0.0004 | 0.0233 | 0.9854 | 0.0073  | 0.0179 | 0.6869 | 24.2254 | 0.0847 | -340.5013  |
| LargeArteryStroke | MF0088 | Simple mode               | 18 | 0.0576  | 0.0608 | 0.3570 | 0.0073  | 0.0179 | 0.6869 | 24.2254 | 0.0847 | -340.5013  |
| LargeArteryStroke | MF0088 | Weighted mode             | 18 | -0.0159 | 0.0570 | 0.7837 | 0.0073  | 0.0179 | 0.6869 | 24.2254 | 0.0847 | -340.5013  |
| LargeArteryStroke | MF0089 | MR Egger                  | 18 | 0.1143  | 0.0888 | 0.2167 | -0.0176 | 0.0218 | 0.4320 | 19.2196 | 0.2574 | -181.8913  |
| LargeArteryStroke | MF0089 | Weighted median           | 18 | 0.0797  | 0.0382 | 0.0370 | -0.0176 | 0.0218 | 0.4320 | 19.2196 | 0.2574 | -181.8913  |
| LargeArteryStroke | MF0089 | Inverse variance weighted | 18 | 0.0466  | 0.0289 | 0.1064 | -0.0176 | 0.0218 | 0.4320 | 19.2196 | 0.2574 | -181.8913  |
| LargeArteryStroke | MF0089 | Simple mode               | 18 | 0.1144  | 0.0693 | 0.1172 | -0.0176 | 0.0218 | 0.4320 | 19.2196 | 0.2574 | -181.8913  |
| LargeArteryStroke | MF0089 | Weighted mode             | 18 | 0.1067  | 0.0673 | 0.1311 | -0.0176 | 0.0218 | 0.4320 | 19.2196 | 0.2574 | -181.8913  |
| LargeArteryStroke | MF0090 | MR Egger                  | 18 | 0.0157  | 0.0903 | 0.8639 | 0.0021  | 0.0221 | 0.9241 | 27.8955 | 0.0325 | -319.4959  |
| LargeArteryStroke | MF0090 | Weighted median           | 18 | 0.0176  | 0.0351 | 0.6156 | 0.0021  | 0.0221 | 0.9241 | 27.8955 | 0.0325 | -319.4959  |
| LargeArteryStroke | MF0090 | Inverse variance weighted | 18 | 0.0240  | 0.0288 | 0.4044 | 0.0021  | 0.0221 | 0.9241 | 27.8955 | 0.0325 | -319.4959  |
| LargeArteryStroke | MF0090 | Simple mode               | 18 | -0.0261 | 0.0702 | 0.7146 | 0.0021  | 0.0221 | 0.9241 | 27.8955 | 0.0325 | -319.4959  |
| LargeArteryStroke | MF0090 | Weighted mode             | 18 | -0.0277 | 0.0641 | 0.6709 | 0.0021  | 0.0221 | 0.9241 | 27.8955 | 0.0325 | -319.4959  |
| LargeArteryStroke | MF0091 | MR Egger                  | 18 | 0.0177  | 0.0907 | 0.8476 | 0.0017  | 0.0222 | 0.9392 | 28.1172 | 0.0306 | -312.2415  |

|                   |           |                           |    |         |        |        |         |        |        |         |        |           |
|-------------------|-----------|---------------------------|----|---------|--------|--------|---------|--------|--------|---------|--------|-----------|
| LargeArteryStroke | MF0091    | Weighted median           | 18 | 0.0178  | 0.0338 | 0.5974 | 0.0017  | 0.0222 | 0.9392 | 28.1172 | 0.0306 | -312.2415 |
| LargeArteryStroke | MF0091    | Inverse variance weighted | 18 | 0.0244  | 0.0289 | 0.3993 | 0.0017  | 0.0222 | 0.9392 | 28.1172 | 0.0306 | -312.2415 |
| LargeArteryStroke | MF0091    | Simple mode               | 18 | -0.0271 | 0.0770 | 0.7291 | 0.0017  | 0.0222 | 0.9392 | 28.1172 | 0.0306 | -312.2415 |
| LargeArteryStroke | MF0091    | Weighted mode             | 18 | -0.0303 | 0.0657 | 0.6502 | 0.0017  | 0.0222 | 0.9392 | 28.1172 | 0.0306 | -312.2415 |
| LargeArteryStroke | MF0092    | MR Egger                  | 18 | 0.0047  | 0.0752 | 0.9504 | 0.0092  | 0.0184 | 0.6257 | 15.8772 | 0.4616 | -309.5971 |
| LargeArteryStroke | MF0092    | Weighted median           | 18 | 0.0234  | 0.0347 | 0.4993 | 0.0092  | 0.0184 | 0.6257 | 15.8772 | 0.4616 | -309.5971 |
| LargeArteryStroke | MF0092    | Inverse variance weighted | 18 | 0.0401  | 0.0247 | 0.1046 | 0.0092  | 0.0184 | 0.6257 | 15.8772 | 0.4616 | -309.5971 |
| LargeArteryStroke | MF0092    | Simple mode               | 18 | 0.0270  | 0.0674 | 0.6940 | 0.0092  | 0.0184 | 0.6257 | 15.8772 | 0.4616 | -309.5971 |
| LargeArteryStroke | MF0092    | Weighted mode             | 18 | 0.0283  | 0.0678 | 0.6821 | 0.0092  | 0.0184 | 0.6257 | 15.8772 | 0.4616 | -309.5971 |
| LargeArteryStroke | MF0093    | MR Egger                  | 18 | 0.4347  | 0.3012 | 0.1682 | -0.1009 | 0.0739 | 0.1908 | 29.3142 | 0.0317 | -10.4521  |
| LargeArteryStroke | MF0093    | Weighted median           | 18 | 0.0169  | 0.1179 | 0.8863 | -0.1009 | 0.0739 | 0.1908 | 29.3142 | 0.0317 | -10.4521  |
| LargeArteryStroke | MF0093    | Inverse variance weighted | 18 | 0.0460  | 0.1014 | 0.6497 | -0.1009 | 0.0739 | 0.1908 | 29.3142 | 0.0317 | -10.4521  |
| LargeArteryStroke | MF0093    | Simple mode               | 18 | -0.2361 | 0.2157 | 0.2890 | -0.1009 | 0.0739 | 0.1908 | 29.3142 | 0.0317 | -10.4521  |
| LargeArteryStroke | MF0093    | Weighted mode             | 18 | -0.1105 | 0.2062 | 0.5990 | -0.1009 | 0.0739 | 0.1908 | 29.3142 | 0.0317 | -10.4521  |
| LargeArteryStroke | MF0094    | MR Egger                  | 18 | 0.0410  | 0.0964 | 0.6764 | -0.0060 | 0.0236 | 0.8042 | 16.0476 | 0.4496 | -154.4499 |
| LargeArteryStroke | MF0094    | Weighted median           | 18 | 0.0184  | 0.0441 | 0.6765 | -0.0060 | 0.0236 | 0.8042 | 16.0476 | 0.4496 | -154.4499 |
| LargeArteryStroke | MF0094    | Inverse variance weighted | 18 | 0.0180  | 0.0316 | 0.5683 | -0.0060 | 0.0236 | 0.8042 | 16.0476 | 0.4496 | -154.4499 |
| LargeArteryStroke | MF0094    | Simple mode               | 18 | 0.0136  | 0.0735 | 0.8554 | -0.0060 | 0.0236 | 0.8042 | 16.0476 | 0.4496 | -154.4499 |
| LargeArteryStroke | MF0094    | Weighted mode             | 18 | 0.0190  | 0.0697 | 0.7885 | -0.0060 | 0.0236 | 0.8042 | 16.0476 | 0.4496 | -154.4499 |
| LargeArteryStroke | MF0095    | MR Egger                  | 18 | -0.0930 | 0.1178 | 0.4416 | 0.0295  | 0.0289 | 0.3224 | 18.9657 | 0.3305 | -162.1291 |
| LargeArteryStroke | MF0095    | Weighted median           | 18 | 0.0214  | 0.0544 | 0.6947 | 0.0295  | 0.0289 | 0.3224 | 18.9657 | 0.3305 | -162.1291 |
| LargeArteryStroke | MF0095    | Inverse variance weighted | 18 | 0.0207  | 0.0387 | 0.5938 | 0.0295  | 0.0289 | 0.3224 | 18.9657 | 0.3305 | -162.1291 |
| LargeArteryStroke | MF0095    | Simple mode               | 18 | 0.0423  | 0.1048 | 0.6917 | 0.0295  | 0.0289 | 0.3224 | 18.9657 | 0.3305 | -162.1291 |
| LargeArteryStroke | MF0095    | Weighted mode             | 18 | 0.0086  | 0.0998 | 0.9322 | 0.0295  | 0.0289 | 0.3224 | 18.9657 | 0.3305 | -162.1291 |
| LargeArteryStroke | MF0096    | MR Egger                  | 18 | -0.0281 | 0.0347 | 0.4291 | 0.0017  | 0.0085 | 0.8469 | 18.4432 | 0.2986 | -628.9924 |
| LargeArteryStroke | MF0096    | Weighted median           | 18 | -0.0240 | 0.0153 | 0.1165 | 0.0017  | 0.0085 | 0.8469 | 18.4432 | 0.2986 | -628.9924 |
| LargeArteryStroke | MF0096    | Inverse variance weighted | 18 | -0.0217 | 0.0111 | 0.0497 | 0.0017  | 0.0085 | 0.8469 | 18.4432 | 0.2986 | -628.9924 |
| LargeArteryStroke | MF0096    | Simple mode               | 18 | -0.0271 | 0.0263 | 0.3165 | 0.0017  | 0.0085 | 0.8469 | 18.4432 | 0.2986 | -628.9924 |
| LargeArteryStroke | MF0096    | Weighted mode             | 18 | -0.0284 | 0.0270 | 0.3084 | 0.0017  | 0.0085 | 0.8469 | 18.4432 | 0.2986 | -628.9924 |
| LargeArteryStroke | MF0097    | MR Egger                  | 18 | 0.0763  | 0.1025 | 0.4679 | -0.0043 | 0.0251 | 0.8664 | 19.9102 | 0.2243 | -128.9979 |
| LargeArteryStroke | MF0097    | Weighted median           | 18 | 0.0301  | 0.0446 | 0.5004 | -0.0043 | 0.0251 | 0.8664 | 19.9102 | 0.2243 | -128.9979 |
| LargeArteryStroke | MF0097    | Inverse variance weighted | 18 | 0.0597  | 0.0327 | 0.0679 | -0.0043 | 0.0251 | 0.8664 | 19.9102 | 0.2243 | -128.9979 |
| LargeArteryStroke | MF0097    | Simple mode               | 18 | -0.0109 | 0.0796 | 0.8926 | -0.0043 | 0.0251 | 0.8664 | 19.9102 | 0.2243 | -128.9979 |
| LargeArteryStroke | MF0097    | Weighted mode             | 18 | -0.0073 | 0.0778 | 0.9260 | -0.0043 | 0.0251 | 0.8664 | 19.9102 | 0.2243 | -128.9979 |
| LargeArteryStroke | MF0098    | MR Egger                  | 18 | 0.0139  | 0.0331 | 0.6813 | -0.0042 | 0.0081 | 0.6118 | 17.0115 | 0.3849 | -992.8846 |
| LargeArteryStroke | MF0098    | Weighted median           | 18 | 0.0025  | 0.0154 | 0.8699 | -0.0042 | 0.0081 | 0.6118 | 17.0115 | 0.3849 | -992.8846 |
| LargeArteryStroke | MF0098    | Inverse variance weighted | 18 | -0.0023 | 0.0106 | 0.8261 | -0.0042 | 0.0081 | 0.6118 | 17.0115 | 0.3849 | -992.8846 |
| LargeArteryStroke | MF0098    | Simple mode               | 18 | 0.0255  | 0.0296 | 0.3997 | -0.0042 | 0.0081 | 0.6118 | 17.0115 | 0.3849 | -992.8846 |
| LargeArteryStroke | MF0098    | Weighted mode             | 18 | 0.0249  | 0.0270 | 0.3692 | -0.0042 | 0.0081 | 0.6118 | 17.0115 | 0.3849 | -992.8846 |
| LargeArteryStroke | MF0100    | MR Egger                  | 18 | -0.3837 | 0.4575 | 0.4140 | 0.0612  | 0.1122 | 0.5928 | 28.3312 | 0.0289 | -0.7081   |
| LargeArteryStroke | MF0100    | Weighted median           | 18 | -0.2399 | 0.1728 | 0.1650 | 0.0612  | 0.1122 | 0.5928 | 28.3312 | 0.0289 | -0.7081   |
| LargeArteryStroke | MF0100    | Inverse variance weighted | 18 | -0.1479 | 0.1471 | 0.3147 | 0.0612  | 0.1122 | 0.5928 | 28.3312 | 0.0289 | -0.7081   |
| LargeArteryStroke | MF0100    | Simple mode               | 18 | -0.2875 | 0.3006 | 0.3523 | 0.0612  | 0.1122 | 0.5928 | 28.3312 | 0.0289 | -0.7081   |
| LargeArteryStroke | MF0100    | Weighted mode             | 18 | -0.2431 | 0.2863 | 0.4076 | 0.0612  | 0.1122 | 0.5928 | 28.3312 | 0.0289 | -0.7081   |
| LargeArteryStroke | MF0101    | MR Egger                  | 18 | 0.0633  | 0.1284 | 0.6287 | -0.0120 | 0.0315 | 0.7083 | 16.8685 | 0.3942 | -75.6863  |
| LargeArteryStroke | MF0101    | Weighted median           | 18 | 0.0479  | 0.0584 | 0.4117 | -0.0120 | 0.0315 | 0.7083 | 16.8685 | 0.3942 | -75.6863  |
| LargeArteryStroke | MF0101    | Inverse variance weighted | 18 | 0.0171  | 0.0411 | 0.6770 | -0.0120 | 0.0315 | 0.7083 | 16.8685 | 0.3942 | -75.6863  |
| LargeArteryStroke | MF0101    | Simple mode               | 18 | 0.0201  | 0.0924 | 0.8307 | -0.0120 | 0.0315 | 0.7083 | 16.8685 | 0.3942 | -75.6863  |
| LargeArteryStroke | MF0101    | Weighted mode             | 18 | 0.0220  | 0.0909 | 0.8113 | -0.0120 | 0.0315 | 0.7083 | 16.8685 | 0.3942 | -75.6863  |
| LargeArteryStroke | MF0102    | MR Egger                  | 18 | 0.0991  | 0.1138 | 0.3967 | -0.0182 | 0.0279 | 0.5240 | 5.8529  | 0.9896 | -156.4685 |
| LargeArteryStroke | MF0102    | Weighted median           | 18 | 0.0500  | 0.0494 | 0.3114 | -0.0182 | 0.0279 | 0.5240 | 5.8529  | 0.9896 | -156.4685 |
| LargeArteryStroke | MF0102    | Inverse variance weighted | 18 | 0.0291  | 0.0374 | 0.4364 | -0.0182 | 0.0279 | 0.5240 | 5.8529  | 0.9896 | -156.4685 |
| LargeArteryStroke | MF0102    | Simple mode               | 18 | 0.0795  | 0.0859 | 0.3675 | -0.0182 | 0.0279 | 0.5240 | 5.8529  | 0.9896 | -156.4685 |
| LargeArteryStroke | MF0102    | Weighted mode             | 18 | 0.0795  | 0.0826 | 0.3492 | -0.0182 | 0.0279 | 0.5240 | 5.8529  | 0.9896 | -156.4685 |
| LargeArteryStroke | MF0103    | MR Egger                  | 18 | -0.0426 | 0.0567 | 0.4638 | 0.0069  | 0.0139 | 0.6286 | 16.2007 | 0.4390 | -465.1181 |
| LargeArteryStroke | MF0103    | Weighted median           | 18 | -0.0099 | 0.0250 | 0.6937 | 0.0069  | 0.0139 | 0.6286 | 16.2007 | 0.4390 | -465.1181 |
| LargeArteryStroke | MF0103    | Inverse variance weighted | 18 | -0.0162 | 0.0185 | 0.3826 | 0.0069  | 0.0139 | 0.6286 | 16.2007 | 0.4390 | -465.1181 |
| LargeArteryStroke | MF0103    | Simple mode               | 18 | -0.0277 | 0.0497 | 0.5844 | 0.0069  | 0.0139 | 0.6286 | 16.2007 | 0.4390 | -465.1181 |
| LargeArteryStroke | MF0103    | Weighted mode             | 18 | -0.0204 | 0.0445 | 0.6526 | 0.0069  | 0.0139 | 0.6286 | 16.2007 | 0.4390 | -465.1181 |
| LargeArteryStroke | c_Bacilli | MR Egger                  | 18 | 0.2102  | 0.1320 | 0.1309 | -0.0502 | 0.0324 | 0.1409 | 12.5935 | 0.7629 | -55.0250  |
| LargeArteryStroke | c_Bacilli | Weighted median           | 18 | -0.0047 | 0.0613 | 0.9393 | -0.0502 | 0.0324 | 0.1409 | 12.5935 | 0.7629 | -55.0250  |

|                   |                                          |                           |    |         |        |        |         |        |        |         |        |          |
|-------------------|------------------------------------------|---------------------------|----|---------|--------|--------|---------|--------|--------|---------|--------|----------|
| LargeArteryStroke | c_Bacilli                                | Inverse variance weighted | 18 | 0.0170  | 0.0434 | 0.6950 | -0.0502 | 0.0324 | 0.1409 | 12.5935 | 0.7629 | -55.0250 |
| LargeArteryStroke | c_Bacilli                                | Simple mode               | 18 | -0.0599 | 0.1007 | 0.5598 | -0.0502 | 0.0324 | 0.1409 | 12.5935 | 0.7629 | -55.0250 |
| LargeArteryStroke | c_Bacilli                                | Weighted mode             | 18 | -0.0487 | 0.0979 | 0.6253 | -0.0502 | 0.0324 | 0.1409 | 12.5935 | 0.7629 | -55.0250 |
| LargeArteryStroke | c_Betaproteobacteria                     | MR Egger                  | 18 | 0.1231  | 0.2513 | 0.6309 | -0.0019 | 0.0616 | 0.9758 | 16.2660 | 0.4346 | -0.4172  |
| LargeArteryStroke | c_Betaproteobacteria                     | Weighted median           | 18 | 0.0860  | 0.1082 | 0.4266 | -0.0019 | 0.0616 | 0.9758 | 16.2660 | 0.4346 | -0.4172  |
| LargeArteryStroke | c_Betaproteobacteria                     | Inverse variance weighted | 18 | 0.1158  | 0.0819 | 0.1571 | -0.0019 | 0.0616 | 0.9758 | 16.2660 | 0.4346 | -0.4172  |
| LargeArteryStroke | c_Betaproteobacteria                     | Simple mode               | 18 | 0.0113  | 0.1724 | 0.9483 | -0.0019 | 0.0616 | 0.9758 | 16.2660 | 0.4346 | -0.4172  |
| LargeArteryStroke | c_Betaproteobacteria                     | Weighted mode             | 18 | 0.0261  | 0.1638 | 0.8752 | -0.0019 | 0.0616 | 0.9758 | 16.2660 | 0.4346 | -0.4172  |
| LargeArteryStroke | c_Negativicutes                          | MR Egger                  | 18 | 0.0545  | 0.2015 | 0.7901 | -0.0279 | 0.0494 | 0.5801 | 15.1777 | 0.5117 | -34.0576 |
| LargeArteryStroke | c_Negativicutes                          | Weighted median           | 18 | -0.0238 | 0.0895 | 0.7907 | -0.0279 | 0.0494 | 0.5801 | 15.1777 | 0.5117 | -34.0576 |
| LargeArteryStroke | c_Negativicutes                          | Inverse variance weighted | 18 | -0.0529 | 0.0662 | 0.4236 | -0.0279 | 0.0494 | 0.5801 | 15.1777 | 0.5117 | -34.0576 |
| LargeArteryStroke | c_Negativicutes                          | Simple mode               | 18 | 0.0082  | 0.1477 | 0.9564 | -0.0279 | 0.0494 | 0.5801 | 15.1777 | 0.5117 | -34.0576 |
| LargeArteryStroke | c_Negativicutes                          | Weighted mode             | 18 | 0.0082  | 0.1508 | 0.9573 | -0.0279 | 0.0494 | 0.5801 | 15.1777 | 0.5117 | -34.0576 |
| LargeArteryStroke | f_Acidaminococcaceae                     | MR Egger                  | 18 | 0.3869  | 0.2466 | 0.1362 | -0.1081 | 0.0605 | 0.0928 | 14.3618 | 0.6413 | -9.6545  |
| LargeArteryStroke | f_Acidaminococcaceae                     | Weighted median           | 18 | -0.0257 | 0.1173 | 0.8264 | -0.1081 | 0.0605 | 0.0928 | 14.3618 | 0.6413 | -9.6545  |
| LargeArteryStroke | f_Acidaminococcaceae                     | Inverse variance weighted | 18 | -0.0295 | 0.0810 | 0.7160 | -0.1081 | 0.0605 | 0.0928 | 14.3618 | 0.6413 | -9.6545  |
| LargeArteryStroke | f_Acidaminococcaceae                     | Simple mode               | 18 | -0.0657 | 0.1813 | 0.7216 | -0.1081 | 0.0605 | 0.0928 | 14.3618 | 0.6413 | -9.6545  |
| LargeArteryStroke | f_Acidaminococcaceae                     | Weighted mode             | 18 | -0.0608 | 0.1935 | 0.7572 | -0.1081 | 0.0605 | 0.0928 | 14.3618 | 0.6413 | -9.6545  |
| LargeArteryStroke | f_Actinomycetaceae                       | MR Egger                  | 18 | 0.2386  | 0.1189 | 0.0620 | -0.0476 | 0.0292 | 0.1223 | 15.9199 | 0.5295 | -73.1405 |
| LargeArteryStroke | f_Actinomycetaceae                       | Weighted median           | 18 | 0.0838  | 0.0549 | 0.1267 | -0.0476 | 0.0292 | 0.1223 | 15.9199 | 0.5295 | -73.1405 |
| LargeArteryStroke | f_Actinomycetaceae                       | Inverse variance weighted | 18 | 0.0553  | 0.0390 | 0.1563 | -0.0476 | 0.0292 | 0.1223 | 15.9199 | 0.5295 | -73.1405 |
| LargeArteryStroke | f_Actinomycetaceae                       | Simple mode               | 18 | 0.1687  | 0.1024 | 0.1178 | -0.0476 | 0.0292 | 0.1223 | 15.9199 | 0.5295 | -73.1405 |
| LargeArteryStroke | f_Actinomycetaceae                       | Weighted mode             | 18 | 0.1636  | 0.1069 | 0.1444 | -0.0476 | 0.0292 | 0.1223 | 15.9199 | 0.5295 | -73.1405 |
| LargeArteryStroke | f_Aerococcaceae                          | MR Egger                  | 18 | -0.2521 | 0.1887 | 0.2002 | 0.0680  | 0.0463 | 0.1611 | 11.0784 | 0.8525 | -56.2868 |
| LargeArteryStroke | f_Aerococcaceae                          | Weighted median           | 18 | 0.0424  | 0.0832 | 0.6102 | 0.0680  | 0.0463 | 0.1611 | 11.0784 | 0.8525 | -56.2868 |
| LargeArteryStroke | f_Aerococcaceae                          | Inverse variance weighted | 18 | 0.0097  | 0.0620 | 0.8751 | 0.0680  | 0.0463 | 0.1611 | 11.0784 | 0.8525 | -56.2868 |
| LargeArteryStroke | f_Aerococcaceae                          | Simple mode               | 18 | 0.1459  | 0.1618 | 0.3798 | 0.0680  | 0.0463 | 0.1611 | 11.0784 | 0.8525 | -56.2868 |
| LargeArteryStroke | f_Aerococcaceae                          | Weighted mode             | 18 | 0.1313  | 0.1534 | 0.4041 | 0.0680  | 0.0463 | 0.1611 | 11.0784 | 0.8525 | -56.2868 |
| LargeArteryStroke | f_Bacillaceae                            | MR Egger                  | 18 | -0.1039 | 0.1732 | 0.5571 | 0.0177  | 0.0425 | 0.6816 | 17.5268 | 0.3523 | -55.8129 |
| LargeArteryStroke | f_Bacillaceae                            | Weighted median           | 18 | -0.0078 | 0.0778 | 0.9199 | 0.0177  | 0.0425 | 0.6816 | 17.5268 | 0.3523 | -55.8129 |
| LargeArteryStroke | f_Bacillaceae                            | Inverse variance weighted | 18 | -0.0355 | 0.0555 | 0.5221 | 0.0177  | 0.0425 | 0.6816 | 17.5268 | 0.3523 | -55.8129 |
| LargeArteryStroke | f_Bacillaceae                            | Simple mode               | 18 | -0.0061 | 0.1569 | 0.9696 | 0.0177  | 0.0425 | 0.6816 | 17.5268 | 0.3523 | -55.8129 |
| LargeArteryStroke | f_Bacillaceae                            | Weighted mode             | 18 | 0.0202  | 0.1482 | 0.8933 | 0.0177  | 0.0425 | 0.6816 | 17.5268 | 0.3523 | -55.8129 |
| LargeArteryStroke | f_Bifidobacteriaceae                     | MR Egger                  | 18 | 0.1632  | 0.2333 | 0.4943 | -0.0418 | 0.0572 | 0.4761 | 11.2571 | 0.7933 | -12.4505 |
| LargeArteryStroke | f_Bifidobacteriaceae                     | Weighted median           | 18 | -0.0480 | 0.1017 | 0.6370 | -0.0418 | 0.0572 | 0.4761 | 11.2571 | 0.7933 | -12.4505 |
| LargeArteryStroke | f_Bifidobacteriaceae                     | Inverse variance weighted | 18 | 0.0024  | 0.0766 | 0.9752 | -0.0418 | 0.0572 | 0.4761 | 11.2571 | 0.7933 | -12.4505 |
| LargeArteryStroke | f_Bifidobacteriaceae                     | Simple mode               | 18 | -0.1143 | 0.1692 | 0.5084 | -0.0418 | 0.0572 | 0.4761 | 11.2571 | 0.7933 | -12.4505 |
| LargeArteryStroke | f_Bifidobacteriaceae                     | Weighted mode             | 18 | -0.1188 | 0.1549 | 0.4538 | -0.0418 | 0.0572 | 0.4761 | 11.2571 | 0.7933 | -12.4505 |
| LargeArteryStroke | f_Burkholderiaceae                       | MR Egger                  | 18 | 0.2342  | 0.3168 | 0.4705 | -0.0574 | 0.0777 | 0.4710 | 26.5043 | 0.0473 | -16.4803 |
| LargeArteryStroke | f_Burkholderiaceae                       | Weighted median           | 18 | -0.0064 | 0.1206 | 0.9574 | -0.0574 | 0.0777 | 0.4710 | 26.5043 | 0.0473 | -16.4803 |
| LargeArteryStroke | f_Burkholderiaceae                       | Inverse variance weighted | 18 | 0.0132  | 0.1026 | 0.8974 | -0.0574 | 0.0777 | 0.4710 | 26.5043 | 0.0473 | -16.4803 |
| LargeArteryStroke | f_Burkholderiaceae                       | Simple mode               | 18 | -0.0589 | 0.2694 | 0.8295 | -0.0574 | 0.0777 | 0.4710 | 26.5043 | 0.0473 | -16.4803 |
| LargeArteryStroke | f_Burkholderiaceae                       | Weighted mode             | 18 | 0.0604  | 0.2297 | 0.7958 | -0.0574 | 0.0777 | 0.4710 | 26.5043 | 0.0473 | -16.4803 |
| LargeArteryStroke | f_Clostridiales_Family_XI_Incertae_Sedis | MR Egger                  | 18 | 0.1249  | 0.2103 | 0.5609 | -0.0060 | 0.0516 | 0.9085 | 13.2877 | 0.6516 | -8.1632  |
| LargeArteryStroke | f_Clostridiales_Family_XI_Incertae_Sedis | Weighted median           | 18 | 0.1234  | 0.0946 | 0.1922 | -0.0060 | 0.0516 | 0.9085 | 13.2877 | 0.6516 | -8.1632  |
| LargeArteryStroke | f_Clostridiales_Family_XI_Incertae_Sedis | Inverse variance weighted | 18 | 0.1017  | 0.0691 | 0.1408 | -0.0060 | 0.0516 | 0.9085 | 13.2877 | 0.6516 | -8.1632  |
| LargeArteryStroke | f_Clostridiales_Family_XI_Incertae_Sedis | Simple mode               | 18 | 0.2568  | 0.1562 | 0.1186 | -0.0060 | 0.0516 | 0.9085 | 13.2877 | 0.6516 | -8.1632  |
| LargeArteryStroke | f_Clostridiales_Family_XI_Incertae_Sedis | Weighted mode             | 18 | 0.2568  | 0.1549 | 0.1158 | -0.0060 | 0.0516 | 0.9085 | 13.2877 | 0.6516 | -8.1632  |
| LargeArteryStroke | f_Coriobacteriaceae                      | MR Egger                  | 18 | -0.0518 | 0.1959 | 0.7948 | 0.0047  | 0.0480 | 0.9226 | 17.5660 | 0.3499 | -83.0582 |
| LargeArteryStroke | f_Coriobacteriaceae                      | Weighted median           | 18 | -0.0891 | 0.0873 | 0.3070 | 0.0047  | 0.0480 | 0.9226 | 17.5660 | 0.3499 | -83.0582 |
| LargeArteryStroke | f_Coriobacteriaceae                      | Inverse variance weighted | 18 | -0.0335 | 0.0624 | 0.5911 | 0.0047  | 0.0480 | 0.9226 | 17.5660 | 0.3499 | -83.0582 |
| LargeArteryStroke | f_Coriobacteriaceae                      | Simple mode               | 18 | -0.1311 | 0.1549 | 0.4091 | 0.0047  | 0.0480 | 0.9226 | 17.5660 | 0.3499 | -83.0582 |
| LargeArteryStroke | f_Coriobacteriaceae                      | Weighted mode             | 18 | -0.1209 | 0.1529 | 0.4399 | 0.0047  | 0.0480 | 0.9226 | 17.5660 | 0.3499 | -83.0582 |
| LargeArteryStroke | f_Enterobacteriaceae                     | MR Egger                  | 18 | 0.4693  | 0.3484 | 0.1968 | -0.1114 | 0.0855 | 0.2110 | 34.1508 | 0.0080 | -4.6678  |
| LargeArteryStroke | f_Enterobacteriaceae                     | Weighted median           | 18 | -0.0545 | 0.1225 | 0.6561 | -0.1114 | 0.0855 | 0.2110 | 34.1508 | 0.0080 | -4.6678  |
| LargeArteryStroke | f_Enterobacteriaceae                     | Inverse variance weighted | 18 | 0.0404  | 0.1167 | 0.7295 | -0.1114 | 0.0855 | 0.2110 | 34.1508 | 0.0080 | -4.6678  |
| LargeArteryStroke | f_Enterobacteriaceae                     | Simple mode               | 18 | -0.1629 | 0.2066 | 0.4412 | -0.1114 | 0.0855 | 0.2110 | 34.1508 | 0.0080 | -4.6678  |
| LargeArteryStroke | f_Enterobacteriaceae                     | Weighted mode             | 18 | -0.1101 | 0.2076 | 0.6028 | -0.1114 | 0.0855 | 0.2110 | 34.1508 | 0.0080 | -4.6678  |
| LargeArteryStroke | f_Eubacteriaceae                         | MR Egger                  | 18 | 0.2234  | 0.1680 | 0.2022 | -0.0314 | 0.0412 | 0.4573 | 10.6358 | 0.8314 | -49.9781 |
| LargeArteryStroke | f_Eubacteriaceae                         | Weighted median           | 18 | 0.1105  | 0.0751 | 0.1409 | -0.0314 | 0.0412 | 0.4573 | 10.6358 | 0.8314 | -49.9781 |
| LargeArteryStroke | f_Eubacteriaceae                         | Inverse variance weighted | 18 | 0.1026  | 0.0552 | 0.0630 | -0.0314 | 0.0412 | 0.4573 | 10.6358 | 0.8314 | -49.9781 |

|                   |                         |                           |    |         |        |        |         |        |        |         |        |           |
|-------------------|-------------------------|---------------------------|----|---------|--------|--------|---------|--------|--------|---------|--------|-----------|
| LargeArteryStroke | f_Eubacteriaceae        | Simple mode               | 18 | 0.1238  | 0.1351 | 0.3723 | -0.0314 | 0.0412 | 0.4573 | 10.6358 | 0.8314 | -49.9781  |
| LargeArteryStroke | f_Eubacteriaceae        | Weighted mode             | 18 | 0.1103  | 0.1338 | 0.4210 | -0.0314 | 0.0412 | 0.4573 | 10.6358 | 0.8314 | -49.9781  |
| LargeArteryStroke | f_Lachnospiraceae       | MR Egger                  | 18 | 0.0603  | 0.1067 | 0.5794 | -0.0063 | 0.0262 | 0.8132 | 8.1966  | 0.9428 | -178.1380 |
| LargeArteryStroke | f_Lachnospiraceae       | Weighted median           | 18 | 0.0564  | 0.0460 | 0.2196 | -0.0063 | 0.0262 | 0.8132 | 8.1966  | 0.9428 | -178.1380 |
| LargeArteryStroke | f_Lachnospiraceae       | Inverse variance weighted | 18 | 0.0361  | 0.0350 | 0.3021 | -0.0063 | 0.0262 | 0.8132 | 8.1966  | 0.9428 | -178.1380 |
| LargeArteryStroke | f_Lachnospiraceae       | Simple mode               | 18 | 0.0714  | 0.0832 | 0.4028 | -0.0063 | 0.0262 | 0.8132 | 8.1966  | 0.9428 | -178.1380 |
| LargeArteryStroke | f_Lachnospiraceae       | Weighted mode             | 18 | 0.0670  | 0.0777 | 0.4009 | -0.0063 | 0.0262 | 0.8132 | 8.1966  | 0.9428 | -178.1380 |
| LargeArteryStroke | f_Lactobacillaceae      | MR Egger                  | 18 | 0.0065  | 0.1958 | 0.9740 | 0.0007  | 0.0480 | 0.9890 | 16.3795 | 0.4268 | -23.4955  |
| LargeArteryStroke | f_Lactobacillaceae      | Weighted median           | 18 | -0.0713 | 0.0863 | 0.4092 | 0.0007  | 0.0480 | 0.9890 | 16.3795 | 0.4268 | -23.4955  |
| LargeArteryStroke | f_Lactobacillaceae      | Inverse variance weighted | 18 | 0.0091  | 0.0635 | 0.8864 | 0.0007  | 0.0480 | 0.9890 | 16.3795 | 0.4268 | -23.4955  |
| LargeArteryStroke | f_Lactobacillaceae      | Simple mode               | 18 | -0.1602 | 0.1691 | 0.3568 | 0.0007  | 0.0480 | 0.9890 | 16.3795 | 0.4268 | -23.4955  |
| LargeArteryStroke | f_Lactobacillaceae      | Weighted mode             | 18 | -0.1381 | 0.1427 | 0.3468 | 0.0007  | 0.0480 | 0.9890 | 16.3795 | 0.4268 | -23.4955  |
| LargeArteryStroke | f_Leuconostocaceae      | MR Egger                  | 18 | -0.0628 | 0.2828 | 0.8270 | -0.0061 | 0.0694 | 0.9313 | 14.3089 | 0.5757 | -12.3382  |
| LargeArteryStroke | f_Leuconostocaceae      | Weighted median           | 18 | -0.1168 | 0.1293 | 0.3663 | -0.0061 | 0.0694 | 0.9313 | 14.3089 | 0.5757 | -12.3382  |
| LargeArteryStroke | f_Leuconostocaceae      | Inverse variance weighted | 18 | -0.0862 | 0.0929 | 0.3532 | -0.0061 | 0.0694 | 0.9313 | 14.3089 | 0.5757 | -12.3382  |
| LargeArteryStroke | f_Leuconostocaceae      | Simple mode               | 18 | -0.2251 | 0.2322 | 0.3461 | -0.0061 | 0.0694 | 0.9313 | 14.3089 | 0.5757 | -12.3382  |
| LargeArteryStroke | f_Leuconostocaceae      | Weighted mode             | 18 | -0.1864 | 0.2236 | 0.4162 | -0.0061 | 0.0694 | 0.9313 | 14.3089 | 0.5757 | -12.3382  |
| LargeArteryStroke | f_Neisseriaceae         | MR Egger                  | 18 | -0.0016 | 0.2722 | 0.9954 | -0.0199 | 0.0668 | 0.7691 | 14.4728 | 0.5635 | -15.8698  |
| LargeArteryStroke | f_Neisseriaceae         | Weighted median           | 18 | -0.0376 | 0.1216 | 0.7570 | -0.0199 | 0.0668 | 0.7691 | 14.4728 | 0.5635 | -15.8698  |
| LargeArteryStroke | f_Neisseriaceae         | Inverse variance weighted | 18 | -0.0783 | 0.0894 | 0.3807 | -0.0199 | 0.0668 | 0.7691 | 14.4728 | 0.5635 | -15.8698  |
| LargeArteryStroke | f_Neisseriaceae         | Simple mode               | 18 | -0.0306 | 0.2059 | 0.8838 | -0.0199 | 0.0668 | 0.7691 | 14.4728 | 0.5635 | -15.8698  |
| LargeArteryStroke | f_Neisseriaceae         | Weighted mode             | 18 | -0.0146 | 0.2023 | 0.9434 | -0.0199 | 0.0668 | 0.7691 | 14.4728 | 0.5635 | -15.8698  |
| LargeArteryStroke | f_Peptostreptococcaceae | MR Egger                  | 18 | 0.1678  | 0.2204 | 0.4576 | -0.0412 | 0.0541 | 0.4572 | 19.3860 | 0.2492 | -3.5893   |
| LargeArteryStroke | f_Peptostreptococcaceae | Weighted median           | 18 | 0.0172  | 0.0901 | 0.8487 | -0.0412 | 0.0541 | 0.4572 | 19.3860 | 0.2492 | -3.5893   |
| LargeArteryStroke | f_Peptostreptococcaceae | Inverse variance weighted | 18 | 0.0092  | 0.0715 | 0.8979 | -0.0412 | 0.0541 | 0.4572 | 19.3860 | 0.2492 | -3.5893   |
| LargeArteryStroke | f_Peptostreptococcaceae | Simple mode               | 18 | -0.0790 | 0.1464 | 0.5962 | -0.0412 | 0.0541 | 0.4572 | 19.3860 | 0.2492 | -3.5893   |
| LargeArteryStroke | f_Peptostreptococcaceae | Weighted mode             | 18 | 0.0108  | 0.1566 | 0.9456 | -0.0412 | 0.0541 | 0.4572 | 19.3860 | 0.2492 | -3.5893   |
| LargeArteryStroke | f_Porphyromonadaceae    | MR Egger                  | 18 | -0.2362 | 0.1142 | 0.0553 | 0.0543  | 0.0280 | 0.0705 | 16.1717 | 0.5117 | -72.2421  |
| LargeArteryStroke | f_Porphyromonadaceae    | Weighted median           | 18 | -0.0461 | 0.0517 | 0.3723 | 0.0543  | 0.0280 | 0.0705 | 16.1717 | 0.5117 | -72.2421  |
| LargeArteryStroke | f_Porphyromonadaceae    | Inverse variance weighted | 18 | -0.0271 | 0.0375 | 0.4708 | 0.0543  | 0.0280 | 0.0705 | 16.1717 | 0.5117 | -72.2421  |
| LargeArteryStroke | f_Porphyromonadaceae    | Simple mode               | 18 | -0.0555 | 0.0845 | 0.5197 | 0.0543  | 0.0280 | 0.0705 | 16.1717 | 0.5117 | -72.2421  |
| LargeArteryStroke | f_Porphyromonadaceae    | Weighted mode             | 18 | -0.0603 | 0.0839 | 0.4822 | 0.0543  | 0.0280 | 0.0705 | 16.1717 | 0.5117 | -72.2421  |
| LargeArteryStroke | f_Prevotellaceae        | MR Egger                  | 18 | -0.0501 | 0.3690 | 0.8937 | 0.0116  | 0.0905 | 0.8994 | 17.0109 | 0.3849 | -8.6414   |
| LargeArteryStroke | f_Prevotellaceae        | Weighted median           | 18 | -0.1040 | 0.1799 | 0.5632 | 0.0116  | 0.0905 | 0.8994 | 17.0109 | 0.3849 | -8.6414   |
| LargeArteryStroke | f_Prevotellaceae        | Inverse variance weighted | 18 | -0.0053 | 0.1176 | 0.9640 | 0.0116  | 0.0905 | 0.8994 | 17.0109 | 0.3849 | -8.6414   |
| LargeArteryStroke | f_Prevotellaceae        | Simple mode               | 18 | -0.3771 | 0.3301 | 0.2691 | 0.0116  | 0.0905 | 0.8994 | 17.0109 | 0.3849 | -8.6414   |
| LargeArteryStroke | f_Prevotellaceae        | Weighted mode             | 18 | -0.3830 | 0.3376 | 0.2722 | 0.0116  | 0.0905 | 0.8994 | 17.0109 | 0.3849 | -8.6414   |
| LargeArteryStroke | f_Staphylococcaceae     | MR Egger                  | 18 | 0.1561  | 0.2122 | 0.4725 | -0.0108 | 0.0520 | 0.8382 | 12.9656 | 0.6753 | -29.7002  |
| LargeArteryStroke | f_Staphylococcaceae     | Weighted median           | 18 | 0.1232  | 0.0920 | 0.1806 | -0.0108 | 0.0520 | 0.8382 | 12.9656 | 0.6753 | -29.7002  |
| LargeArteryStroke | f_Staphylococcaceae     | Inverse variance weighted | 18 | 0.1145  | 0.0697 | 0.1003 | -0.0108 | 0.0520 | 0.8382 | 12.9656 | 0.6753 | -29.7002  |
| LargeArteryStroke | f_Staphylococcaceae     | Simple mode               | 18 | -0.0212 | 0.1581 | 0.8951 | -0.0108 | 0.0520 | 0.8382 | 12.9656 | 0.6753 | -29.7002  |
| LargeArteryStroke | f_Staphylococcaceae     | Weighted mode             | 18 | -0.0129 | 0.1564 | 0.9353 | -0.0108 | 0.0520 | 0.8382 | 12.9656 | 0.6753 | -29.7002  |
| LargeArteryStroke | f_Streptococcaceae      | MR Egger                  | 18 | 0.1400  | 0.1632 | 0.4034 | -0.0397 | 0.0400 | 0.3355 | 12.3593 | 0.7779 | -45.4816  |
| LargeArteryStroke | f_Streptococcaceae      | Weighted median           | 18 | -0.0018 | 0.0726 | 0.9806 | -0.0397 | 0.0400 | 0.3355 | 12.3593 | 0.7779 | -45.4816  |
| LargeArteryStroke | f_Streptococcaceae      | Inverse variance weighted | 18 | -0.0130 | 0.0536 | 0.8083 | -0.0397 | 0.0400 | 0.3355 | 12.3593 | 0.7779 | -45.4816  |
| LargeArteryStroke | f_Streptococcaceae      | Simple mode               | 18 | 0.0029  | 0.1192 | 0.9809 | -0.0397 | 0.0400 | 0.3355 | 12.3593 | 0.7779 | -45.4816  |
| LargeArteryStroke | f_Streptococcaceae      | Weighted mode             | 18 | 0.0029  | 0.1191 | 0.9809 | -0.0397 | 0.0400 | 0.3355 | 12.3593 | 0.7779 | -45.4816  |
| LargeArteryStroke | f_Sutterellaceae        | MR Egger                  | 18 | 0.1283  | 0.3152 | 0.6892 | -0.0019 | 0.0773 | 0.9803 | 14.6814 | 0.5481 | -0.2819   |
| LargeArteryStroke | f_Sutterellaceae        | Weighted median           | 18 | 0.0323  | 0.1364 | 0.8125 | -0.0019 | 0.0773 | 0.9803 | 14.6814 | 0.5481 | -0.2819   |
| LargeArteryStroke | f_Sutterellaceae        | Inverse variance weighted | 18 | 0.1209  | 0.1035 | 0.2428 | -0.0019 | 0.0773 | 0.9803 | 14.6814 | 0.5481 | -0.2819   |
| LargeArteryStroke | f_Sutterellaceae        | Simple mode               | 18 | -0.0471 | 0.2237 | 0.8357 | -0.0019 | 0.0773 | 0.9803 | 14.6814 | 0.5481 | -0.2819   |
| LargeArteryStroke | f_Sutterellaceae        | Weighted mode             | 18 | -0.0387 | 0.2248 | 0.8653 | -0.0019 | 0.0773 | 0.9803 | 14.6814 | 0.5481 | -0.2819   |
| LargeArteryStroke | f_Veillonellaceae       | MR Egger                  | 18 | -0.2061 | 0.2264 | 0.3760 | 0.0535  | 0.0555 | 0.3493 | 10.7618 | 0.8687 | -56.2047  |
| LargeArteryStroke | f_Veillonellaceae       | Weighted median           | 18 | 0.0240  | 0.1008 | 0.8120 | 0.0535  | 0.0555 | 0.3493 | 10.7618 | 0.8687 | -56.2047  |
| LargeArteryStroke | f_Veillonellaceae       | Inverse variance weighted | 18 | 0.0000  | 0.0743 | 0.9998 | 0.0535  | 0.0555 | 0.3493 | 10.7618 | 0.8687 | -56.2047  |
| LargeArteryStroke | f_Veillonellaceae       | Simple mode               | 18 | -0.0190 | 0.1870 | 0.9202 | 0.0535  | 0.0555 | 0.3493 | 10.7618 | 0.8687 | -56.2047  |
| LargeArteryStroke | f_Veillonellaceae       | Weighted mode             | 18 | 0.0093  | 0.1747 | 0.9582 | 0.0535  | 0.0555 | 0.3493 | 10.7618 | 0.8687 | -56.2047  |
| LargeArteryStroke | g_Abiotrophia           | MR Egger                  | 18 | -0.3549 | 0.2142 | 0.1171 | 0.0940  | 0.0525 | 0.0925 | 11.3443 | 0.8381 | -44.1492  |
| LargeArteryStroke | g_Abiotrophia           | Weighted median           | 18 | -0.0146 | 0.0974 | 0.8808 | 0.0940  | 0.0525 | 0.0925 | 11.3443 | 0.8381 | -44.1492  |
| LargeArteryStroke | g_Abiotrophia           | Inverse variance weighted | 18 | 0.0072  | 0.0704 | 0.9184 | 0.0940  | 0.0525 | 0.0925 | 11.3443 | 0.8381 | -44.1492  |
| LargeArteryStroke | g_Abiotrophia           | Simple mode               | 18 | 0.1522  | 0.1810 | 0.4120 | 0.0940  | 0.0525 | 0.0925 | 11.3443 | 0.8381 | -44.1492  |

|                   |                   |                           |    |         |        |        |         |        |        |         |        |           |
|-------------------|-------------------|---------------------------|----|---------|--------|--------|---------|--------|--------|---------|--------|-----------|
| LargeArteryStroke | g_Abiotrophia     | Weighted mode             | 18 | -0.0110 | 0.1714 | 0.9496 | 0.0940  | 0.0525 | 0.0925 | 11.3443 | 0.8381 | -44.1492  |
| LargeArteryStroke | g_Acidaminococcus | MR Egger                  | 18 | -0.0567 | 0.2514 | 0.8245 | 0.0189  | 0.0617 | 0.7635 | 14.9828 | 0.5259 | -40.7075  |
| LargeArteryStroke | g_Acidaminococcus | Weighted median           | 18 | 0.0616  | 0.1148 | 0.5917 | 0.0189  | 0.0617 | 0.7635 | 14.9828 | 0.5259 | -40.7075  |
| LargeArteryStroke | g_Acidaminococcus | Inverse variance weighted | 18 | 0.0160  | 0.0826 | 0.8463 | 0.0189  | 0.0617 | 0.7635 | 14.9828 | 0.5259 | -40.7075  |
| LargeArteryStroke | g_Acidaminococcus | Simple mode               | 18 | 0.1951  | 0.2016 | 0.3469 | 0.0189  | 0.0617 | 0.7635 | 14.9828 | 0.5259 | -40.7075  |
| LargeArteryStroke | g_Acidaminococcus | Weighted mode             | 18 | 0.1869  | 0.2010 | 0.3655 | 0.0189  | 0.0617 | 0.7635 | 14.9828 | 0.5259 | -40.7075  |
| LargeArteryStroke | g_Actinomyces     | MR Egger                  | 18 | 0.2801  | 0.1710 | 0.1209 | -0.0741 | 0.0419 | 0.0965 | 11.5530 | 0.8264 | -61.5623  |
| LargeArteryStroke | g_Actinomyces     | Weighted median           | 18 | 0.0453  | 0.0729 | 0.5347 | -0.0741 | 0.0419 | 0.0965 | 11.5530 | 0.8264 | -61.5623  |
| LargeArteryStroke | g_Actinomyces     | Inverse variance weighted | 18 | -0.0052 | 0.0562 | 0.9268 | -0.0741 | 0.0419 | 0.0965 | 11.5530 | 0.8264 | -61.5623  |
| LargeArteryStroke | g_Actinomyces     | Simple mode               | 18 | 0.0801  | 0.1282 | 0.5404 | -0.0741 | 0.0419 | 0.0965 | 11.5530 | 0.8264 | -61.5623  |
| LargeArteryStroke | g_Actinomyces     | Weighted mode             | 18 | 0.0856  | 0.1160 | 0.4710 | -0.0741 | 0.0419 | 0.0965 | 11.5530 | 0.8264 | -61.5623  |
| LargeArteryStroke | g_Aggregatibacter | MR Egger                  | 18 | 0.1061  | 0.3020 | 0.7300 | -0.0449 | 0.0741 | 0.5527 | 13.2649 | 0.6533 | -5.4467   |
| LargeArteryStroke | g_Aggregatibacter | Weighted median           | 18 | -0.0270 | 0.1356 | 0.8423 | -0.0449 | 0.0741 | 0.5527 | 13.2649 | 0.6533 | -5.4467   |
| LargeArteryStroke | g_Aggregatibacter | Inverse variance weighted | 18 | -0.0670 | 0.0992 | 0.4997 | -0.0449 | 0.0741 | 0.5527 | 13.2649 | 0.6533 | -5.4467   |
| LargeArteryStroke | g_Aggregatibacter | Simple mode               | 18 | 0.0706  | 0.2305 | 0.7630 | -0.0449 | 0.0741 | 0.5527 | 13.2649 | 0.6533 | -5.4467   |
| LargeArteryStroke | g_Aggregatibacter | Weighted mode             | 18 | 0.0635  | 0.2229 | 0.7792 | -0.0449 | 0.0741 | 0.5527 | 13.2649 | 0.6533 | -5.4467   |
| LargeArteryStroke | g_Alistipes       | MR Egger                  | 18 | -0.3654 | 0.2512 | 0.1651 | 0.1130  | 0.0616 | 0.0854 | 21.8533 | 0.1904 | -15.2102  |
| LargeArteryStroke | g_Alistipes       | Weighted median           | 18 | 0.0355  | 0.1099 | 0.7468 | 0.1130  | 0.0616 | 0.0854 | 21.8533 | 0.1904 | -15.2102  |
| LargeArteryStroke | g_Alistipes       | Inverse variance weighted | 18 | 0.0697  | 0.0880 | 0.4284 | 0.1130  | 0.0616 | 0.0854 | 21.8533 | 0.1904 | -15.2102  |
| LargeArteryStroke | g_Alistipes       | Simple mode               | 18 | 0.0521  | 0.1909 | 0.7881 | 0.1130  | 0.0616 | 0.0854 | 21.8533 | 0.1904 | -15.2102  |
| LargeArteryStroke | g_Alistipes       | Weighted mode             | 18 | 0.0082  | 0.1710 | 0.9625 | 0.1130  | 0.0616 | 0.0854 | 21.8533 | 0.1904 | -15.2102  |
| LargeArteryStroke | g_Anaerococcus    | MR Egger                  | 18 | 0.2378  | 0.2686 | 0.3892 | -0.0394 | 0.0659 | 0.5577 | 18.1429 | 0.3156 | -1.3382   |
| LargeArteryStroke | g_Anaerococcus    | Weighted median           | 18 | 0.1079  | 0.1182 | 0.3613 | -0.0394 | 0.0659 | 0.5577 | 18.1429 | 0.3156 | -1.3382   |
| LargeArteryStroke | g_Anaerococcus    | Inverse variance weighted | 18 | 0.0858  | 0.0865 | 0.3212 | -0.0394 | 0.0659 | 0.5577 | 18.1429 | 0.3156 | -1.3382   |
| LargeArteryStroke | g_Anaerococcus    | Simple mode               | 18 | 0.1866  | 0.2018 | 0.3682 | -0.0394 | 0.0659 | 0.5577 | 18.1429 | 0.3156 | -1.3382   |
| LargeArteryStroke | g_Anaerococcus    | Weighted mode             | 18 | 0.1414  | 0.1832 | 0.4509 | -0.0394 | 0.0659 | 0.5577 | 18.1429 | 0.3156 | -1.3382   |
| LargeArteryStroke | g_Anaerofustis    | MR Egger                  | 18 | 0.1259  | 0.1524 | 0.4209 | -0.0109 | 0.0374 | 0.7733 | 12.8053 | 0.6869 | -133.0733 |
| LargeArteryStroke | g_Anaerofustis    | Weighted median           | 18 | 0.0543  | 0.0688 | 0.4299 | -0.0109 | 0.0374 | 0.7733 | 12.8053 | 0.6869 | -133.0733 |
| LargeArteryStroke | g_Anaerofustis    | Inverse variance weighted | 18 | 0.0837  | 0.0500 | 0.0944 | -0.0109 | 0.0374 | 0.7733 | 12.8053 | 0.6869 | -133.0733 |
| LargeArteryStroke | g_Anaerofustis    | Simple mode               | 18 | 0.0372  | 0.1238 | 0.7674 | -0.0109 | 0.0374 | 0.7733 | 12.8053 | 0.6869 | -133.0733 |
| LargeArteryStroke | g_Anaerofustis    | Weighted mode             | 18 | 0.0372  | 0.1156 | 0.7515 | -0.0109 | 0.0374 | 0.7733 | 12.8053 | 0.6869 | -133.0733 |
| LargeArteryStroke | g_Anaerostipes    | MR Egger                  | 18 | -0.0312 | 0.1376 | 0.8235 | 0.0068  | 0.0337 | 0.8419 | 12.2816 | 0.7244 | -182.5582 |
| LargeArteryStroke | g_Anaerostipes    | Weighted median           | 18 | -0.0195 | 0.0639 | 0.7598 | 0.0068  | 0.0337 | 0.8419 | 12.2816 | 0.7244 | -182.5582 |
| LargeArteryStroke | g_Anaerostipes    | Inverse variance weighted | 18 | -0.0049 | 0.0452 | 0.9145 | 0.0068  | 0.0337 | 0.8419 | 12.2816 | 0.7244 | -182.5582 |
| LargeArteryStroke | g_Anaerostipes    | Simple mode               | 18 | -0.0839 | 0.1204 | 0.4953 | 0.0068  | 0.0337 | 0.8419 | 12.2816 | 0.7244 | -182.5582 |
| LargeArteryStroke | g_Anaerostipes    | Weighted mode             | 18 | -0.1114 | 0.1288 | 0.3993 | 0.0068  | 0.0337 | 0.8419 | 12.2816 | 0.7244 | -182.5582 |
| LargeArteryStroke | g_Anaerotruncus   | MR Egger                  | 18 | 0.0665  | 0.1391 | 0.6393 | -0.0177 | 0.0341 | 0.6105 | 21.0078 | 0.1782 | -40.7194  |
| LargeArteryStroke | g_Anaerotruncus   | Weighted median           | 18 | 0.0369  | 0.0580 | 0.5245 | -0.0177 | 0.0341 | 0.6105 | 21.0078 | 0.1782 | -40.7194  |
| LargeArteryStroke | g_Anaerotruncus   | Inverse variance weighted | 18 | -0.0018 | 0.0447 | 0.9678 | -0.0177 | 0.0341 | 0.6105 | 21.0078 | 0.1782 | -40.7194  |
| LargeArteryStroke | g_Anaerotruncus   | Simple mode               | 18 | 0.0454  | 0.1041 | 0.6684 | -0.0177 | 0.0341 | 0.6105 | 21.0078 | 0.1782 | -40.7194  |
| LargeArteryStroke | g_Anaerotruncus   | Weighted mode             | 18 | 0.0417  | 0.0856 | 0.6324 | -0.0177 | 0.0341 | 0.6105 | 21.0078 | 0.1782 | -40.7194  |
| LargeArteryStroke | g_Atopobium       | MR Egger                  | 18 | 0.2057  | 0.1446 | 0.1741 | -0.0484 | 0.0355 | 0.1910 | 17.3090 | 0.4336 | -75.8664  |
| LargeArteryStroke | g_Atopobium       | Weighted median           | 18 | -0.0110 | 0.0683 | 0.8719 | -0.0484 | 0.0355 | 0.1910 | 17.3090 | 0.4336 | -75.8664  |
| LargeArteryStroke | g_Atopobium       | Inverse variance weighted | 18 | 0.0192  | 0.0479 | 0.6890 | -0.0484 | 0.0355 | 0.1910 | 17.3090 | 0.4336 | -75.8664  |
| LargeArteryStroke | g_Atopobium       | Simple mode               | 18 | -0.0729 | 0.1351 | 0.5964 | -0.0484 | 0.0355 | 0.1910 | 17.3090 | 0.4336 | -75.8664  |
| LargeArteryStroke | g_Atopobium       | Weighted mode             | 18 | -0.0451 | 0.1186 | 0.7087 | -0.0484 | 0.0355 | 0.1910 | 17.3090 | 0.4336 | -75.8664  |
| LargeArteryStroke | g_Bacteroides     | MR Egger                  | 18 | -0.0830 | 0.1264 | 0.5209 | 0.0191  | 0.0310 | 0.5464 | 16.9993 | 0.3856 | -148.9239 |
| LargeArteryStroke | g_Bacteroides     | Weighted median           | 18 | -0.0027 | 0.0559 | 0.9622 | 0.0191  | 0.0310 | 0.5464 | 16.9993 | 0.3856 | -148.9239 |
| LargeArteryStroke | g_Bacteroides     | Inverse variance weighted | 18 | -0.0094 | 0.0408 | 0.8177 | 0.0191  | 0.0310 | 0.5464 | 16.9993 | 0.3856 | -148.9239 |
| LargeArteryStroke | g_Bacteroides     | Simple mode               | 18 | 0.0426  | 0.1067 | 0.6946 | 0.0191  | 0.0310 | 0.5464 | 16.9993 | 0.3856 | -148.9239 |
| LargeArteryStroke | g_Bacteroides     | Weighted mode             | 18 | 0.0222  | 0.1024 | 0.8311 | 0.0191  | 0.0310 | 0.5464 | 16.9993 | 0.3856 | -148.9239 |
| LargeArteryStroke | g_Blautia         | MR Egger                  | 18 | 0.1279  | 0.1073 | 0.2507 | -0.0213 | 0.0263 | 0.4294 | 15.2530 | 0.5062 | -130.8233 |
| LargeArteryStroke | g_Blautia         | Weighted median           | 18 | -0.0151 | 0.0513 | 0.7678 | -0.0213 | 0.0263 | 0.4294 | 15.2530 | 0.5062 | -130.8233 |
| LargeArteryStroke | g_Blautia         | Inverse variance weighted | 18 | 0.0457  | 0.0352 | 0.1945 | -0.0213 | 0.0263 | 0.4294 | 15.2530 | 0.5062 | -130.8233 |
| LargeArteryStroke | g_Blautia         | Simple mode               | 18 | -0.0390 | 0.0931 | 0.6807 | -0.0213 | 0.0263 | 0.4294 | 15.2530 | 0.5062 | -130.8233 |
| LargeArteryStroke | g_Blautia         | Weighted mode             | 18 | -0.0424 | 0.0920 | 0.6509 | -0.0213 | 0.0263 | 0.4294 | 15.2530 | 0.5062 | -130.8233 |
| LargeArteryStroke | g_Citrobacter     | MR Egger                  | 18 | 0.4944  | 0.3174 | 0.1388 | -0.1209 | 0.0778 | 0.1400 | 19.4902 | 0.3011 | -1.5148   |
| LargeArteryStroke | g_Citrobacter     | Weighted median           | 18 | -0.0377 | 0.1461 | 0.7964 | -0.1209 | 0.0778 | 0.1400 | 19.4902 | 0.3011 | -1.5148   |
| LargeArteryStroke | g_Citrobacter     | Inverse variance weighted | 18 | 0.0290  | 0.1085 | 0.7893 | -0.1209 | 0.0778 | 0.1400 | 19.4902 | 0.3011 | -1.5148   |
| LargeArteryStroke | g_Citrobacter     | Simple mode               | 18 | -0.2468 | 0.2625 | 0.3602 | -0.1209 | 0.0778 | 0.1400 | 19.4902 | 0.3011 | -1.5148   |
| LargeArteryStroke | g_Citrobacter     | Weighted mode             | 18 | -0.1735 | 0.2572 | 0.5090 | -0.1209 | 0.0778 | 0.1400 | 19.4902 | 0.3011 | -1.5148   |

|                   |                    |                           |    |         |        |        |         |        |        |         |        |           |
|-------------------|--------------------|---------------------------|----|---------|--------|--------|---------|--------|--------|---------|--------|-----------|
| LargeArteryStroke | g_Clostridium      | MR Egger                  | 18 | 0.0671  | 0.1057 | 0.5346 | -0.0101 | 0.0259 | 0.7009 | 8.3533  | 0.9376 | -168.2823 |
| LargeArteryStroke | g_Clostridium      | Weighted median           | 18 | 0.0069  | 0.0466 | 0.8831 | -0.0101 | 0.0259 | 0.7009 | 8.3533  | 0.9376 | -168.2823 |
| LargeArteryStroke | g_Clostridium      | Inverse variance weighted | 18 | 0.0280  | 0.0347 | 0.4193 | -0.0101 | 0.0259 | 0.7009 | 8.3533  | 0.9376 | -168.2823 |
| LargeArteryStroke | g_Clostridium      | Simple mode               | 18 | -0.0357 | 0.0822 | 0.6698 | -0.0101 | 0.0259 | 0.7009 | 8.3533  | 0.9376 | -168.2823 |
| LargeArteryStroke | g_Clostridium      | Weighted mode             | 18 | -0.0514 | 0.0763 | 0.5097 | -0.0101 | 0.0259 | 0.7009 | 8.3533  | 0.9376 | -168.2823 |
| LargeArteryStroke | g_Collinsella      | MR Egger                  | 18 | -0.2062 | 0.3652 | 0.5802 | 0.0752  | 0.0895 | 0.4135 | 19.2321 | 0.2568 | -11.3836  |
| LargeArteryStroke | g_Collinsella      | Weighted median           | 18 | -0.0646 | 0.1574 | 0.6817 | 0.0752  | 0.0895 | 0.4135 | 19.2321 | 0.2568 | -11.3836  |
| LargeArteryStroke | g_Collinsella      | Inverse variance weighted | 18 | 0.0834  | 0.1189 | 0.4829 | 0.0752  | 0.0895 | 0.4135 | 19.2321 | 0.2568 | -11.3836  |
| LargeArteryStroke | g_Collinsella      | Simple mode               | 18 | -0.0710 | 0.2928 | 0.8113 | 0.0752  | 0.0895 | 0.4135 | 19.2321 | 0.2568 | -11.3836  |
| LargeArteryStroke | g_Collinsella      | Weighted mode             | 18 | -0.0357 | 0.2537 | 0.8898 | 0.0752  | 0.0895 | 0.4135 | 19.2321 | 0.2568 | -11.3836  |
| LargeArteryStroke | g_Coprobacillus    | MR Egger                  | 18 | -0.0385 | 0.1660 | 0.8194 | 0.0126  | 0.0407 | 0.7610 | 13.6528 | 0.6246 | -43.7282  |
| LargeArteryStroke | g_Coprobacillus    | Weighted median           | 18 | -0.0083 | 0.0754 | 0.9120 | 0.0126  | 0.0407 | 0.7610 | 13.6528 | 0.6246 | -43.7282  |
| LargeArteryStroke | g_Coprobacillus    | Inverse variance weighted | 18 | 0.0100  | 0.0545 | 0.8546 | 0.0126  | 0.0407 | 0.7610 | 13.6528 | 0.6246 | -43.7282  |
| LargeArteryStroke | g_Coprobacillus    | Simple mode               | 18 | -0.1137 | 0.1354 | 0.4124 | 0.0126  | 0.0407 | 0.7610 | 13.6528 | 0.6246 | -43.7282  |
| LargeArteryStroke | g_Coprobacillus    | Weighted mode             | 18 | -0.1174 | 0.1293 | 0.3767 | 0.0126  | 0.0407 | 0.7610 | 13.6528 | 0.6246 | -43.7282  |
| LargeArteryStroke | g_Coprococcus      | MR Egger                  | 18 | -0.1603 | 0.1475 | 0.2932 | 0.0593  | 0.0362 | 0.1205 | 10.3788 | 0.8870 | -176.2398 |
| LargeArteryStroke | g_Coprococcus      | Weighted median           | 18 | 0.0703  | 0.0633 | 0.2669 | 0.0593  | 0.0362 | 0.1205 | 10.3788 | 0.8870 | -176.2398 |
| LargeArteryStroke | g_Coprococcus      | Inverse variance weighted | 18 | 0.0682  | 0.0484 | 0.1593 | 0.0593  | 0.0362 | 0.1205 | 10.3788 | 0.8870 | -176.2398 |
| LargeArteryStroke | g_Coprococcus      | Simple mode               | 18 | 0.1080  | 0.1242 | 0.3964 | 0.0593  | 0.0362 | 0.1205 | 10.3788 | 0.8870 | -176.2398 |
| LargeArteryStroke | g_Coprococcus      | Weighted mode             | 18 | 0.0612  | 0.1135 | 0.5967 | 0.0593  | 0.0362 | 0.1205 | 10.3788 | 0.8870 | -176.2398 |
| LargeArteryStroke | g_Desulfovibrio    | MR Egger                  | 18 | -0.1899 | 0.4556 | 0.6823 | -0.0269 | 0.1118 | 0.8128 | 23.3135 | 0.1056 | -0.5829   |
| LargeArteryStroke | g_Desulfovibrio    | Weighted median           | 18 | -0.3173 | 0.1849 | 0.0861 | -0.0269 | 0.1118 | 0.8128 | 23.3135 | 0.1056 | -0.5829   |
| LargeArteryStroke | g_Desulfovibrio    | Inverse variance weighted | 18 | -0.2936 | 0.1454 | 0.0435 | -0.0269 | 0.1118 | 0.8128 | 23.3135 | 0.1056 | -0.5829   |
| LargeArteryStroke | g_Desulfovibrio    | Simple mode               | 18 | -0.3069 | 0.3293 | 0.3644 | -0.0269 | 0.1118 | 0.8128 | 23.3135 | 0.1056 | -0.5829   |
| LargeArteryStroke | g_Desulfovibrio    | Weighted mode             | 18 | -0.3945 | 0.3193 | 0.2335 | -0.0269 | 0.1118 | 0.8128 | 23.3135 | 0.1056 | -0.5829   |
| LargeArteryStroke | g_Dorea            | MR Egger                  | 18 | 0.1951  | 0.1258 | 0.1404 | -0.0348 | 0.0308 | 0.2765 | 12.1297 | 0.7922 | -79.8444  |
| LargeArteryStroke | g_Dorea            | Weighted median           | 18 | 0.0127  | 0.0548 | 0.8166 | -0.0348 | 0.0308 | 0.2765 | 12.1297 | 0.7922 | -79.8444  |
| LargeArteryStroke | g_Dorea            | Inverse variance weighted | 18 | 0.0613  | 0.0413 | 0.1380 | -0.0348 | 0.0308 | 0.2765 | 12.1297 | 0.7922 | -79.8444  |
| LargeArteryStroke | g_Dorea            | Simple mode               | 18 | -0.0203 | 0.0956 | 0.8345 | -0.0348 | 0.0308 | 0.2765 | 12.1297 | 0.7922 | -79.8444  |
| LargeArteryStroke | g_Dorea            | Weighted mode             | 18 | -0.0223 | 0.0879 | 0.8032 | -0.0348 | 0.0308 | 0.2765 | 12.1297 | 0.7922 | -79.8444  |
| LargeArteryStroke | g_Enterobacter     | MR Egger                  | 18 | 0.4270  | 0.4123 | 0.3158 | -0.1365 | 0.1011 | 0.1957 | 26.2202 | 0.0705 | -1.7955   |
| LargeArteryStroke | g_Enterobacter     | Weighted median           | 18 | -0.0254 | 0.1585 | 0.8728 | -0.1365 | 0.1011 | 0.1957 | 26.2202 | 0.0705 | -1.7955   |
| LargeArteryStroke | g_Enterobacter     | Inverse variance weighted | 18 | -0.0988 | 0.1386 | 0.4758 | -0.1365 | 0.1011 | 0.1957 | 26.2202 | 0.0705 | -1.7955   |
| LargeArteryStroke | g_Enterobacter     | Simple mode               | 18 | -0.5268 | 0.2814 | 0.0785 | -0.1365 | 0.1011 | 0.1957 | 26.2202 | 0.0705 | -1.7955   |
| LargeArteryStroke | g_Enterobacter     | Weighted mode             | 18 | -0.0577 | 0.2945 | 0.8469 | -0.1365 | 0.1011 | 0.1957 | 26.2202 | 0.0705 | -1.7955   |
| LargeArteryStroke | g_Escherichia      | MR Egger                  | 18 | 0.5233  | 0.3247 | 0.1266 | -0.1211 | 0.0796 | 0.1479 | 28.3095 | 0.0414 | -11.2141  |
| LargeArteryStroke | g_Escherichia      | Weighted median           | 18 | -0.1163 | 0.1290 | 0.3674 | -0.1211 | 0.0796 | 0.1479 | 28.3095 | 0.0414 | -11.2141  |
| LargeArteryStroke | g_Escherichia      | Inverse variance weighted | 18 | 0.0569  | 0.1106 | 0.6069 | -0.1211 | 0.0796 | 0.1479 | 28.3095 | 0.0414 | -11.2141  |
| LargeArteryStroke | g_Escherichia      | Simple mode               | 18 | -0.2114 | 0.2162 | 0.3420 | -0.1211 | 0.0796 | 0.1479 | 28.3095 | 0.0414 | -11.2141  |
| LargeArteryStroke | g_Escherichia      | Weighted mode             | 18 | -0.1641 | 0.2141 | 0.4539 | -0.1211 | 0.0796 | 0.1479 | 28.3095 | 0.0414 | -11.2141  |
| LargeArteryStroke | g_Faecalibacterium | MR Egger                  | 18 | 0.3721  | 0.1931 | 0.0720 | -0.1038 | 0.0474 | 0.0436 | 18.2087 | 0.3758 | -30.6273  |
| LargeArteryStroke | g_Faecalibacterium | Weighted median           | 18 | 0.0523  | 0.0916 | 0.5680 | -0.1038 | 0.0474 | 0.0436 | 18.2087 | 0.3758 | -30.6273  |
| LargeArteryStroke | g_Faecalibacterium | Inverse variance weighted | 18 | -0.0276 | 0.0656 | 0.6744 | -0.1038 | 0.0474 | 0.0436 | 18.2087 | 0.3758 | -30.6273  |
| LargeArteryStroke | g_Faecalibacterium | Simple mode               | 18 | 0.0902  | 0.1636 | 0.5883 | -0.1038 | 0.0474 | 0.0436 | 18.2087 | 0.3758 | -30.6273  |
| LargeArteryStroke | g_Faecalibacterium | Weighted mode             | 18 | 0.0902  | 0.1430 | 0.5365 | -0.1038 | 0.0474 | 0.0436 | 18.2087 | 0.3758 | -30.6273  |
| LargeArteryStroke | g_Fusobacterium    | MR Egger                  | 18 | -0.5904 | 0.4395 | 0.1978 | 0.0941  | 0.1078 | 0.3957 | 17.1517 | 0.3758 | -7.7836   |
| LargeArteryStroke | g_Fusobacterium    | Weighted median           | 18 | -0.1777 | 0.2044 | 0.3846 | 0.0941  | 0.1078 | 0.3957 | 17.1517 | 0.3758 | -7.7836   |
| LargeArteryStroke | g_Fusobacterium    | Inverse variance weighted | 18 | -0.2281 | 0.1433 | 0.1113 | 0.0941  | 0.1078 | 0.3957 | 17.1517 | 0.3758 | -7.7836   |
| LargeArteryStroke | g_Fusobacterium    | Simple mode               | 18 | -0.0781 | 0.3483 | 0.8252 | 0.0941  | 0.1078 | 0.3957 | 17.1517 | 0.3758 | -7.7836   |
| LargeArteryStroke | g_Fusobacterium    | Weighted mode             | 18 | -0.1283 | 0.3372 | 0.7083 | 0.0941  | 0.1078 | 0.3957 | 17.1517 | 0.3758 | -7.7836   |
| LargeArteryStroke | g_Gemella          | MR Egger                  | 18 | 0.1912  | 0.1705 | 0.2785 | -0.0500 | 0.0418 | 0.2487 | 6.3587  | 0.9904 | -145.7024 |
| LargeArteryStroke | g_Gemella          | Weighted median           | 18 | -0.0020 | 0.0729 | 0.9777 | -0.0500 | 0.0418 | 0.2487 | 6.3587  | 0.9904 | -145.7024 |
| LargeArteryStroke | g_Gemella          | Inverse variance weighted | 18 | -0.0015 | 0.0560 | 0.9783 | -0.0500 | 0.0418 | 0.2487 | 6.3587  | 0.9904 | -145.7024 |
| LargeArteryStroke | g_Gemella          | Simple mode               | 18 | -0.0031 | 0.1200 | 0.9799 | -0.0500 | 0.0418 | 0.2487 | 6.3587  | 0.9904 | -145.7024 |
| LargeArteryStroke | g_Gemella          | Weighted mode             | 18 | 0.0059  | 0.1151 | 0.9596 | -0.0500 | 0.0418 | 0.2487 | 6.3587  | 0.9904 | -145.7024 |
| LargeArteryStroke | g_Granulicatella   | MR Egger                  | 18 | 0.1686  | 0.1498 | 0.2770 | -0.0565 | 0.0367 | 0.1433 | 12.4022 | 0.7752 | -99.2566  |
| LargeArteryStroke | g_Granulicatella   | Weighted median           | 18 | -0.0703 | 0.0652 | 0.2803 | -0.0565 | 0.0367 | 0.1433 | 12.4022 | 0.7752 | -99.2566  |
| LargeArteryStroke | g_Granulicatella   | Inverse variance weighted | 18 | -0.0492 | 0.0492 | 0.3174 | -0.0565 | 0.0367 | 0.1433 | 12.4022 | 0.7752 | -99.2566  |
| LargeArteryStroke | g_Granulicatella   | Simple mode               | 18 | -0.1239 | 0.1225 | 0.3259 | -0.0565 | 0.0367 | 0.1433 | 12.4022 | 0.7752 | -99.2566  |
| LargeArteryStroke | g_Granulicatella   | Weighted mode             | 18 | -0.0962 | 0.1223 | 0.4425 | -0.0565 | 0.0367 | 0.1433 | 12.4022 | 0.7752 | -99.2566  |
| LargeArteryStroke | g_Holdemania       | MR Egger                  | 18 | 0.0087  | 0.1366 | 0.9500 | 0.0095  | 0.0335 | 0.7804 | 17.6166 | 0.3468 | -110.1719 |

|                   |                   |                           |    |         |        |        |         |        |        |         |        |           |
|-------------------|-------------------|---------------------------|----|---------|--------|--------|---------|--------|--------|---------|--------|-----------|
| LargeArteryStroke | g_Holdemania      | Weighted median           | 18 | 0.0565  | 0.0615 | 0.3578 | 0.0095  | 0.0335 | 0.7804 | 17.6166 | 0.3468 | -110.1719 |
| LargeArteryStroke | g_Holdemania      | Inverse variance weighted | 18 | 0.0453  | 0.0436 | 0.2994 | 0.0095  | 0.0335 | 0.7804 | 17.6166 | 0.3468 | -110.1719 |
| LargeArteryStroke | g_Holdemania      | Simple mode               | 18 | 0.1539  | 0.1181 | 0.2099 | 0.0095  | 0.0335 | 0.7804 | 17.6166 | 0.3468 | -110.1719 |
| LargeArteryStroke | g_Holdemania      | Weighted mode             | 18 | 0.1279  | 0.1108 | 0.2644 | 0.0095  | 0.0335 | 0.7804 | 17.6166 | 0.3468 | -110.1719 |
| LargeArteryStroke | g_Klebsiella      | MR Egger                  | 18 | 0.4633  | 0.5517 | 0.4134 | -0.1186 | 0.1353 | 0.3939 | 40.1900 | 0.0012 | -0.6800   |
| LargeArteryStroke | g_Klebsiella      | Weighted median           | 18 | 0.0824  | 0.1816 | 0.6501 | -0.1186 | 0.1353 | 0.3939 | 40.1900 | 0.0012 | -0.6800   |
| LargeArteryStroke | g_Klebsiella      | Inverse variance weighted | 18 | 0.0067  | 0.1799 | 0.9701 | -0.1186 | 0.1353 | 0.3939 | 40.1900 | 0.0012 | -0.6800   |
| LargeArteryStroke | g_Klebsiella      | Simple mode               | 18 | 0.2042  | 0.3555 | 0.5732 | -0.1186 | 0.1353 | 0.3939 | 40.1900 | 0.0012 | -0.6800   |
| LargeArteryStroke | g_Klebsiella      | Weighted mode             | 18 | 0.2042  | 0.3246 | 0.5377 | -0.1186 | 0.1353 | 0.3939 | 40.1900 | 0.0012 | -0.6800   |
| LargeArteryStroke | g_Lactococcus     | MR Egger                  | 18 | 0.1371  | 0.2125 | 0.5279 | -0.0355 | 0.0521 | 0.5056 | 10.0902 | 0.8619 | -30.2958  |
| LargeArteryStroke | g_Lactococcus     | Weighted median           | 18 | -0.0067 | 0.0946 | 0.9433 | -0.0355 | 0.0521 | 0.5056 | 10.0902 | 0.8619 | -30.2958  |
| LargeArteryStroke | g_Lactococcus     | Inverse variance weighted | 18 | 0.0004  | 0.0698 | 0.9954 | -0.0355 | 0.0521 | 0.5056 | 10.0902 | 0.8619 | -30.2958  |
| LargeArteryStroke | g_Lactococcus     | Simple mode               | 18 | -0.0398 | 0.1548 | 0.8000 | -0.0355 | 0.0521 | 0.5056 | 10.0902 | 0.8619 | -30.2958  |
| LargeArteryStroke | g_Lactococcus     | Weighted mode             | 18 | -0.0356 | 0.1655 | 0.8324 | -0.0355 | 0.0521 | 0.5056 | 10.0902 | 0.8619 | -30.2958  |
| LargeArteryStroke | g_Megasphaera     | MR Egger                  | 18 | -0.2514 | 0.2570 | 0.3425 | 0.0906  | 0.0630 | 0.1700 | 12.2518 | 0.7847 | -20.4861  |
| LargeArteryStroke | g_Megasphaera     | Weighted median           | 18 | 0.0927  | 0.1195 | 0.4381 | 0.0906  | 0.0630 | 0.1700 | 12.2518 | 0.7847 | -20.4861  |
| LargeArteryStroke | g_Megasphaera     | Inverse variance weighted | 18 | 0.0975  | 0.0844 | 0.2482 | 0.0906  | 0.0630 | 0.1700 | 12.2518 | 0.7847 | -20.4861  |
| LargeArteryStroke | g_Megasphaera     | Simple mode               | 18 | 0.2215  | 0.2032 | 0.2910 | 0.0906  | 0.0630 | 0.1700 | 12.2518 | 0.7847 | -20.4861  |
| LargeArteryStroke | g_Megasphaera     | Weighted mode             | 18 | 0.1401  | 0.1996 | 0.4923 | 0.0906  | 0.0630 | 0.1700 | 12.2518 | 0.7847 | -20.4861  |
| LargeArteryStroke | g_Mitsuokella     | MR Egger                  | 18 | -0.0282 | 0.2765 | 0.9202 | 0.0425  | 0.0678 | 0.5399 | 11.1574 | 0.7997 | -29.3303  |
| LargeArteryStroke | g_Mitsuokella     | Weighted median           | 18 | 0.1787  | 0.1211 | 0.1401 | 0.0425  | 0.0678 | 0.5399 | 11.1574 | 0.7997 | -29.3303  |
| LargeArteryStroke | g_Mitsuokella     | Inverse variance weighted | 18 | 0.1354  | 0.0908 | 0.1358 | 0.0425  | 0.0678 | 0.5399 | 11.1574 | 0.7997 | -29.3303  |
| LargeArteryStroke | g_Mitsuokella     | Simple mode               | 18 | 0.2154  | 0.2228 | 0.3472 | 0.0425  | 0.0678 | 0.5399 | 11.1574 | 0.7997 | -29.3303  |
| LargeArteryStroke | g_Mitsuokella     | Weighted mode             | 18 | 0.2154  | 0.2044 | 0.3067 | 0.0425  | 0.0678 | 0.5399 | 11.1574 | 0.7997 | -29.3303  |
| LargeArteryStroke | g_Mobiluncus      | MR Egger                  | 18 | 0.2571  | 0.2199 | 0.2594 | -0.0411 | 0.0539 | 0.4569 | 25.6653 | 0.0589 | -27.4966  |
| LargeArteryStroke | g_Mobiluncus      | Weighted median           | 18 | 0.1068  | 0.0900 | 0.2354 | -0.0411 | 0.0539 | 0.4569 | 25.6653 | 0.0589 | -27.4966  |
| LargeArteryStroke | g_Mobiluncus      | Inverse variance weighted | 18 | 0.0988  | 0.0713 | 0.1660 | -0.0411 | 0.0539 | 0.4569 | 25.6653 | 0.0589 | -27.4966  |
| LargeArteryStroke | g_Mobiluncus      | Simple mode               | 18 | 0.1243  | 0.1697 | 0.4739 | -0.0411 | 0.0539 | 0.4569 | 25.6653 | 0.0589 | -27.4966  |
| LargeArteryStroke | g_Mobiluncus      | Weighted mode             | 18 | 0.1122  | 0.1600 | 0.4926 | -0.0411 | 0.0539 | 0.4569 | 25.6653 | 0.0589 | -27.4966  |
| LargeArteryStroke | g_Odoribacter     | MR Egger                  | 18 | -0.4427 | 0.1981 | 0.0401 | 0.1214  | 0.0486 | 0.0238 | 16.5710 | 0.4838 | -36.8182  |
| LargeArteryStroke | g_Odoribacter     | Weighted median           | 18 | 0.0008  | 0.0906 | 0.9932 | 0.1214  | 0.0486 | 0.0238 | 16.5710 | 0.4838 | -36.8182  |
| LargeArteryStroke | g_Odoribacter     | Inverse variance weighted | 18 | 0.0248  | 0.0651 | 0.7035 | 0.1214  | 0.0486 | 0.0238 | 16.5710 | 0.4838 | -36.8182  |
| LargeArteryStroke | g_Odoribacter     | Simple mode               | 18 | -0.0818 | 0.1570 | 0.6089 | 0.1214  | 0.0486 | 0.0238 | 16.5710 | 0.4838 | -36.8182  |
| LargeArteryStroke | g_Odoribacter     | Weighted mode             | 18 | -0.0818 | 0.1337 | 0.5485 | 0.1214  | 0.0486 | 0.0238 | 16.5710 | 0.4838 | -36.8182  |
| LargeArteryStroke | g_Oribacterium    | MR Egger                  | 18 | 0.1558  | 0.1249 | 0.2302 | -0.0387 | 0.0306 | 0.2243 | 9.7407  | 0.9141 | -54.3587  |
| LargeArteryStroke | g_Oribacterium    | Weighted median           | 18 | -0.0199 | 0.0559 | 0.7217 | -0.0387 | 0.0306 | 0.2243 | 9.7407  | 0.9141 | -54.3587  |
| LargeArteryStroke | g_Oribacterium    | Inverse variance weighted | 18 | 0.0067  | 0.0410 | 0.8710 | -0.0387 | 0.0306 | 0.2243 | 9.7407  | 0.9141 | -54.3587  |
| LargeArteryStroke | g_Oribacterium    | Simple mode               | 18 | -0.0231 | 0.0882 | 0.7968 | -0.0387 | 0.0306 | 0.2243 | 9.7407  | 0.9141 | -54.3587  |
| LargeArteryStroke | g_Oribacterium    | Weighted mode             | 18 | -0.0203 | 0.0864 | 0.8169 | -0.0387 | 0.0306 | 0.2243 | 9.7407  | 0.9141 | -54.3587  |
| LargeArteryStroke | g_Oscillibacter   | MR Egger                  | 18 | -0.0261 | 0.2645 | 0.9226 | 0.0198  | 0.0649 | 0.7637 | 24.5169 | 0.0788 | -13.2589  |
| LargeArteryStroke | g_Oscillibacter   | Weighted median           | 18 | -0.0009 | 0.0954 | 0.9924 | 0.0198  | 0.0649 | 0.7637 | 24.5169 | 0.0788 | -13.2589  |
| LargeArteryStroke | g_Oscillibacter   | Inverse variance weighted | 18 | 0.0503  | 0.0845 | 0.5519 | 0.0198  | 0.0649 | 0.7637 | 24.5169 | 0.0788 | -13.2589  |
| LargeArteryStroke | g_Oscillibacter   | Simple mode               | 18 | 0.0134  | 0.2011 | 0.9477 | 0.0198  | 0.0649 | 0.7637 | 24.5169 | 0.0788 | -13.2589  |
| LargeArteryStroke | g_Oscillibacter   | Weighted mode             | 18 | 0.0134  | 0.1883 | 0.9441 | 0.0198  | 0.0649 | 0.7637 | 24.5169 | 0.0788 | -13.2589  |
| LargeArteryStroke | g_Oxalobacter     | MR Egger                  | 18 | -0.3434 | 0.3263 | 0.3082 | 0.0888  | 0.0800 | 0.2834 | 17.8983 | 0.3953 | -10.1269  |
| LargeArteryStroke | g_Oxalobacter     | Weighted median           | 18 | 0.1576  | 0.1473 | 0.2847 | 0.0888  | 0.0800 | 0.2834 | 17.8983 | 0.3953 | -10.1269  |
| LargeArteryStroke | g_Oxalobacter     | Inverse variance weighted | 18 | -0.0013 | 0.1079 | 0.9903 | 0.0888  | 0.0800 | 0.2834 | 17.8983 | 0.3953 | -10.1269  |
| LargeArteryStroke | g_Oxalobacter     | Simple mode               | 18 | 0.2186  | 0.2558 | 0.4047 | 0.0888  | 0.0800 | 0.2834 | 17.8983 | 0.3953 | -10.1269  |
| LargeArteryStroke | g_Oxalobacter     | Weighted mode             | 18 | 0.2312  | 0.2566 | 0.3803 | 0.0888  | 0.0800 | 0.2834 | 17.8983 | 0.3953 | -10.1269  |
| LargeArteryStroke | g_Parabacteroides | MR Egger                  | 18 | -0.1453 | 0.1183 | 0.2372 | 0.0212  | 0.0290 | 0.4763 | 14.1123 | 0.5903 | -96.1482  |
| LargeArteryStroke | g_Parabacteroides | Weighted median           | 18 | -0.0126 | 0.0543 | 0.8160 | 0.0212  | 0.0290 | 0.4763 | 14.1123 | 0.5903 | -96.1482  |
| LargeArteryStroke | g_Parabacteroides | Inverse variance weighted | 18 | -0.0638 | 0.0388 | 0.1006 | 0.0212  | 0.0290 | 0.4763 | 14.1123 | 0.5903 | -96.1482  |
| LargeArteryStroke | g_Parabacteroides | Simple mode               | 18 | -0.0014 | 0.0923 | 0.9880 | 0.0212  | 0.0290 | 0.4763 | 14.1123 | 0.5903 | -96.1482  |
| LargeArteryStroke | g_Parabacteroides | Weighted mode             | 18 | -0.0014 | 0.0957 | 0.9884 | 0.0212  | 0.0290 | 0.4763 | 14.1123 | 0.5903 | -96.1482  |
| LargeArteryStroke | g_Paraprevotella  | MR Egger                  | 18 | -0.0338 | 0.2014 | 0.8690 | 0.0336  | 0.0494 | 0.5054 | 18.2101 | 0.3117 | -65.4368  |
| LargeArteryStroke | g_Paraprevotella  | Weighted median           | 18 | 0.0130  | 0.0878 | 0.8818 | 0.0336  | 0.0494 | 0.5054 | 18.2101 | 0.3117 | -65.4368  |
| LargeArteryStroke | g_Paraprevotella  | Inverse variance weighted | 18 | 0.0958  | 0.0651 | 0.1408 | 0.0336  | 0.0494 | 0.5054 | 18.2101 | 0.3117 | -65.4368  |
| LargeArteryStroke | g_Paraprevotella  | Simple mode               | 18 | 0.0083  | 0.1434 | 0.9547 | 0.0336  | 0.0494 | 0.5054 | 18.2101 | 0.3117 | -65.4368  |
| LargeArteryStroke | g_Paraprevotella  | Weighted mode             | 18 | 0.0045  | 0.1399 | 0.9747 | 0.0336  | 0.0494 | 0.5054 | 18.2101 | 0.3117 | -65.4368  |
| LargeArteryStroke | g_Parasutterella  | MR Egger                  | 18 | -0.0353 | 0.4385 | 0.9369 | 0.0592  | 0.1075 | 0.5894 | 17.2878 | 0.3672 | -0.8535   |
| LargeArteryStroke | g_Parasutterella  | Weighted median           | 18 | 0.0834  | 0.1884 | 0.6579 | 0.0592  | 0.1075 | 0.5894 | 17.2878 | 0.3672 | -0.8535   |

|                   |                        |                           |    |         |        |        |         |        |        |         |        |           |
|-------------------|------------------------|---------------------------|----|---------|--------|--------|---------|--------|--------|---------|--------|-----------|
| LargeArteryStroke | g_Parasutterella       | Inverse variance weighted | 18 | 0.1928  | 0.1410 | 0.1715 | 0.0592  | 0.1075 | 0.5894 | 17.2878 | 0.3672 | -0.8535   |
| LargeArteryStroke | g_Parasutterella       | Simple mode               | 18 | 0.2689  | 0.3605 | 0.4660 | 0.0592  | 0.1075 | 0.5894 | 17.2878 | 0.3672 | -0.8535   |
| LargeArteryStroke | g_Parasutterella       | Weighted mode             | 18 | 0.2339  | 0.3215 | 0.4768 | 0.0592  | 0.1075 | 0.5894 | 17.2878 | 0.3672 | -0.8535   |
| LargeArteryStroke | g_Peptoniphilus        | MR Egger                  | 18 | 0.0763  | 0.2320 | 0.7465 | 0.0081  | 0.0569 | 0.8882 | 14.6956 | 0.5470 | -12.2518  |
| LargeArteryStroke | g_Peptoniphilus        | Weighted median           | 18 | 0.1196  | 0.1028 | 0.2443 | 0.0081  | 0.0569 | 0.8882 | 14.6956 | 0.5470 | -12.2518  |
| LargeArteryStroke | g_Peptoniphilus        | Inverse variance weighted | 18 | 0.1076  | 0.0762 | 0.1579 | 0.0081  | 0.0569 | 0.8882 | 14.6956 | 0.5470 | -12.2518  |
| LargeArteryStroke | g_Peptoniphilus        | Simple mode               | 18 | 0.0932  | 0.1697 | 0.5898 | 0.0081  | 0.0569 | 0.8882 | 14.6956 | 0.5470 | -12.2518  |
| LargeArteryStroke | g_Peptoniphilus        | Weighted mode             | 18 | 0.0781  | 0.1841 | 0.6768 | 0.0081  | 0.0569 | 0.8882 | 14.6956 | 0.5470 | -12.2518  |
| LargeArteryStroke | g_Phascolartobacterium | MR Egger                  | 18 | 0.4143  | 0.2611 | 0.1322 | -0.1163 | 0.0640 | 0.0882 | 20.2464 | 0.2618 | -2.1811   |
| LargeArteryStroke | g_Phascolartobacterium | Weighted median           | 18 | -0.0658 | 0.1212 | 0.5873 | -0.1163 | 0.0640 | 0.0882 | 20.2464 | 0.2618 | -2.1811   |
| LargeArteryStroke | g_Phascolartobacterium | Inverse variance weighted | 18 | -0.0335 | 0.0914 | 0.7141 | -0.1163 | 0.0640 | 0.0882 | 20.2464 | 0.2618 | -2.1811   |
| LargeArteryStroke | g_Phascolartobacterium | Simple mode               | 18 | -0.2230 | 0.1996 | 0.2795 | -0.1163 | 0.0640 | 0.0882 | 20.2464 | 0.2618 | -2.1811   |
| LargeArteryStroke | g_Phascolartobacterium | Weighted mode             | 18 | -0.2095 | 0.2061 | 0.3237 | -0.1163 | 0.0640 | 0.0882 | 20.2464 | 0.2618 | -2.1811   |
| LargeArteryStroke | g_Porphyromonas        | MR Egger                  | 18 | -0.1225 | 0.2885 | 0.6767 | 0.0714  | 0.0708 | 0.3279 | 16.5995 | 0.4818 | -7.6396   |
| LargeArteryStroke | g_Porphyromonas        | Weighted median           | 18 | 0.1654  | 0.1277 | 0.1954 | 0.0714  | 0.0708 | 0.3279 | 16.5995 | 0.4818 | -7.6396   |
| LargeArteryStroke | g_Porphyromonas        | Inverse variance weighted | 18 | 0.1525  | 0.0947 | 0.1075 | 0.0714  | 0.0708 | 0.3279 | 16.5995 | 0.4818 | -7.6396   |
| LargeArteryStroke | g_Porphyromonas        | Simple mode               | 18 | 0.1950  | 0.2085 | 0.3628 | 0.0714  | 0.0708 | 0.3279 | 16.5995 | 0.4818 | -7.6396   |
| LargeArteryStroke | g_Porphyromonas        | Weighted mode             | 18 | 0.1623  | 0.1993 | 0.4268 | 0.0714  | 0.0708 | 0.3279 | 16.5995 | 0.4818 | -7.6396   |
| LargeArteryStroke | g_Providencia          | MR Egger                  | 18 | 0.4946  | 0.3517 | 0.1788 | -0.1216 | 0.0863 | 0.1777 | 28.0946 | 0.0438 | -3.0851   |
| LargeArteryStroke | g_Providencia          | Weighted median           | 18 | -0.0377 | 0.1403 | 0.7880 | -0.1216 | 0.0863 | 0.1777 | 28.0946 | 0.0438 | -3.0851   |
| LargeArteryStroke | g_Providencia          | Inverse variance weighted | 18 | 0.0261  | 0.1188 | 0.8259 | -0.1216 | 0.0863 | 0.1777 | 28.0946 | 0.0438 | -3.0851   |
| LargeArteryStroke | g_Providencia          | Simple mode               | 18 | -0.1040 | 0.2546 | 0.6880 | -0.1216 | 0.0863 | 0.1777 | 28.0946 | 0.0438 | -3.0851   |
| LargeArteryStroke | g_Providencia          | Weighted mode             | 18 | -0.0457 | 0.2310 | 0.8455 | -0.1216 | 0.0863 | 0.1777 | 28.0946 | 0.0438 | -3.0851   |
| LargeArteryStroke | g_Pseudoflavonifractor | MR Egger                  | 18 | -0.0222 | 0.1273 | 0.8635 | 0.0026  | 0.0312 | 0.9348 | 20.9522 | 0.1804 | -139.4239 |
| LargeArteryStroke | g_Pseudoflavonifractor | Weighted median           | 18 | 0.0469  | 0.0577 | 0.4162 | 0.0026  | 0.0312 | 0.9348 | 20.9522 | 0.1804 | -139.4239 |
| LargeArteryStroke | g_Pseudoflavonifractor | Inverse variance weighted | 18 | -0.0122 | 0.0406 | 0.7628 | 0.0026  | 0.0312 | 0.9348 | 20.9522 | 0.1804 | -139.4239 |
| LargeArteryStroke | g_Pseudoflavonifractor | Simple mode               | 18 | 0.1120  | 0.1089 | 0.3180 | 0.0026  | 0.0312 | 0.9348 | 20.9522 | 0.1804 | -139.4239 |
| LargeArteryStroke | g_Pseudoflavonifractor | Weighted mode             | 18 | 0.0994  | 0.0997 | 0.3331 | 0.0026  | 0.0312 | 0.9348 | 20.9522 | 0.1804 | -139.4239 |
| LargeArteryStroke | g_Roseburia            | MR Egger                  | 18 | 0.0535  | 0.1641 | 0.7484 | -0.0163 | 0.0402 | 0.6903 | 11.0089 | 0.8089 | -107.5465 |
| LargeArteryStroke | g_Roseburia            | Weighted median           | 18 | -0.0432 | 0.0721 | 0.5487 | -0.0163 | 0.0402 | 0.6903 | 11.0089 | 0.8089 | -107.5465 |
| LargeArteryStroke | g_Roseburia            | Inverse variance weighted | 18 | -0.0093 | 0.0539 | 0.8624 | -0.0163 | 0.0402 | 0.6903 | 11.0089 | 0.8089 | -107.5465 |
| LargeArteryStroke | g_Roseburia            | Simple mode               | 18 | 0.1141  | 0.1303 | 0.3932 | -0.0163 | 0.0402 | 0.6903 | 11.0089 | 0.8089 | -107.5465 |
| LargeArteryStroke | g_Roseburia            | Weighted mode             | 18 | -0.0466 | 0.1199 | 0.7022 | -0.0163 | 0.0402 | 0.6903 | 11.0089 | 0.8089 | -107.5465 |
| LargeArteryStroke | g_Ruminococcus         | MR Egger                  | 18 | 0.2199  | 0.1398 | 0.1354 | -0.0472 | 0.0343 | 0.1873 | 12.3690 | 0.7773 | -36.1539  |
| LargeArteryStroke | g_Ruminococcus         | Weighted median           | 18 | 0.0215  | 0.0640 | 0.7371 | -0.0472 | 0.0343 | 0.1873 | 12.3690 | 0.7773 | -36.1539  |
| LargeArteryStroke | g_Ruminococcus         | Inverse variance weighted | 18 | 0.0380  | 0.0459 | 0.4085 | -0.0472 | 0.0343 | 0.1873 | 12.3690 | 0.7773 | -36.1539  |
| LargeArteryStroke | g_Ruminococcus         | Simple mode               | 18 | 0.0439  | 0.0994 | 0.6646 | -0.0472 | 0.0343 | 0.1873 | 12.3690 | 0.7773 | -36.1539  |
| LargeArteryStroke | g_Ruminococcus         | Weighted mode             | 18 | 0.0439  | 0.0991 | 0.6637 | -0.0472 | 0.0343 | 0.1873 | 12.3690 | 0.7773 | -36.1539  |
| LargeArteryStroke | g_Salmonella           | MR Egger                  | 18 | 0.4453  | 0.3786 | 0.2566 | -0.1150 | 0.0928 | 0.2335 | 33.9684 | 0.0085 | -1.4660   |
| LargeArteryStroke | g_Salmonella           | Weighted median           | 18 | 0.0259  | 0.1362 | 0.8492 | -0.1150 | 0.0928 | 0.2335 | 33.9684 | 0.0085 | -1.4660   |
| LargeArteryStroke | g_Salmonella           | Inverse variance weighted | 18 | 0.0026  | 0.1262 | 0.9835 | -0.1150 | 0.0928 | 0.2335 | 33.9684 | 0.0085 | -1.4660   |
| LargeArteryStroke | g_Salmonella           | Simple mode               | 18 | -0.0588 | 0.2635 | 0.8262 | -0.1150 | 0.0928 | 0.2335 | 33.9684 | 0.0085 | -1.4660   |
| LargeArteryStroke | g_Salmonella           | Weighted mode             | 18 | -0.0072 | 0.2293 | 0.9753 | -0.1150 | 0.0928 | 0.2335 | 33.9684 | 0.0085 | -1.4660   |
| LargeArteryStroke | g_Shuttleworthia       | MR Egger                  | 18 | 0.1420  | 0.2581 | 0.5899 | -0.0007 | 0.0633 | 0.9908 | 17.3163 | 0.3654 | -19.3049  |
| LargeArteryStroke | g_Shuttleworthia       | Weighted median           | 18 | 0.1020  | 0.1151 | 0.3755 | -0.0007 | 0.0633 | 0.9908 | 17.3163 | 0.3654 | -19.3049  |
| LargeArteryStroke | g_Shuttleworthia       | Inverse variance weighted | 18 | 0.1391  | 0.0822 | 0.0907 | -0.0007 | 0.0633 | 0.9908 | 17.3163 | 0.3654 | -19.3049  |
| LargeArteryStroke | g_Shuttleworthia       | Simple mode               | 18 | 0.1966  | 0.1993 | 0.3378 | -0.0007 | 0.0633 | 0.9908 | 17.3163 | 0.3654 | -19.3049  |
| LargeArteryStroke | g_Shuttleworthia       | Weighted mode             | 18 | 0.1627  | 0.1876 | 0.3978 | -0.0007 | 0.0633 | 0.9908 | 17.3163 | 0.3654 | -19.3049  |
| LargeArteryStroke | g_Solobacterium        | MR Egger                  | 18 | 0.4441  | 0.2002 | 0.0414 | -0.1165 | 0.0491 | 0.0305 | 16.5882 | 0.4826 | -11.6370  |
| LargeArteryStroke | g_Solobacterium        | Weighted median           | 18 | 0.0341  | 0.0887 | 0.7006 | -0.1165 | 0.0491 | 0.0305 | 16.5882 | 0.4826 | -11.6370  |
| LargeArteryStroke | g_Solobacterium        | Inverse variance weighted | 18 | -0.0047 | 0.0658 | 0.9434 | -0.1165 | 0.0491 | 0.0305 | 16.5882 | 0.4826 | -11.6370  |
| LargeArteryStroke | g_Solobacterium        | Simple mode               | 18 | 0.0172  | 0.1357 | 0.9005 | -0.1165 | 0.0491 | 0.0305 | 16.5882 | 0.4826 | -11.6370  |
| LargeArteryStroke | g_Solobacterium        | Weighted mode             | 18 | 0.0172  | 0.1386 | 0.9026 | -0.1165 | 0.0491 | 0.0305 | 16.5882 | 0.4826 | -11.6370  |
| LargeArteryStroke | g_Subdoligranulum      | MR Egger                  | 18 | 0.1137  | 0.1531 | 0.4685 | -0.0073 | 0.0375 | 0.8491 | 11.9668 | 0.7463 | -52.6663  |
| LargeArteryStroke | g_Subdoligranulum      | Weighted median           | 18 | 0.0462  | 0.0675 | 0.4944 | -0.0073 | 0.0375 | 0.8491 | 11.9668 | 0.7463 | -52.6663  |
| LargeArteryStroke | g_Subdoligranulum      | Inverse variance weighted | 18 | 0.0857  | 0.0503 | 0.0882 | -0.0073 | 0.0375 | 0.8491 | 11.9668 | 0.7463 | -52.6663  |
| LargeArteryStroke | g_Subdoligranulum      | Simple mode               | 18 | 0.0163  | 0.1214 | 0.8949 | -0.0073 | 0.0375 | 0.8491 | 11.9668 | 0.7463 | -52.6663  |
| LargeArteryStroke | g_Subdoligranulum      | Weighted mode             | 18 | 0.0163  | 0.1227 | 0.8960 | -0.0073 | 0.0375 | 0.8491 | 11.9668 | 0.7463 | -52.6663  |
| LargeArteryStroke | g_Sutterella           | MR Egger                  | 18 | -0.1219 | 0.4532 | 0.7914 | -0.0029 | 0.1111 | 0.9796 | 17.3308 | 0.3645 | -6.9838   |
| LargeArteryStroke | g_Sutterella           | Weighted median           | 18 | -0.3159 | 0.2094 | 0.1314 | -0.0029 | 0.1111 | 0.9796 | 17.3308 | 0.3645 | -6.9838   |
| LargeArteryStroke | g_Sutterella           | Inverse variance weighted | 18 | -0.1330 | 0.1444 | 0.3569 | -0.0029 | 0.1111 | 0.9796 | 17.3308 | 0.3645 | -6.9838   |

|                   |                        |                           |    |         |        |        |         |        |        |         |        |          |
|-------------------|------------------------|---------------------------|----|---------|--------|--------|---------|--------|--------|---------|--------|----------|
| LargeArteryStroke | g_Sutterella           | Simple mode               | 18 | -0.4604 | 0.3286 | 0.1793 | -0.0029 | 0.1111 | 0.9796 | 17.3308 | 0.3645 | -6.9838  |
| LargeArteryStroke | g_Sutterella           | Weighted mode             | 18 | -0.4942 | 0.3132 | 0.1330 | -0.0029 | 0.1111 | 0.9796 | 17.3308 | 0.3645 | -6.9838  |
| LargeArteryStroke | g_Tannerella           | MR Egger                  | 18 | -0.3224 | 0.2214 | 0.1647 | 0.0763  | 0.0543 | 0.1791 | 6.8599  | 0.9853 | -55.0535 |
| LargeArteryStroke | g_Tannerella           | Weighted median           | 18 | -0.0319 | 0.0962 | 0.7402 | 0.0763  | 0.0543 | 0.1791 | 6.8599  | 0.9853 | -55.0535 |
| LargeArteryStroke | g_Tannerella           | Inverse variance weighted | 18 | -0.0285 | 0.0727 | 0.6946 | 0.0763  | 0.0543 | 0.1791 | 6.8599  | 0.9853 | -55.0535 |
| LargeArteryStroke | g_Tannerella           | Simple mode               | 18 | 0.0945  | 0.1565 | 0.5540 | 0.0763  | 0.0543 | 0.1791 | 6.8599  | 0.9853 | -55.0535 |
| LargeArteryStroke | g_Tannerella           | Weighted mode             | 18 | -0.0717 | 0.1519 | 0.6430 | 0.0763  | 0.0543 | 0.1791 | 6.8599  | 0.9853 | -55.0535 |
| LargeArteryStroke | g_Treponema            | MR Egger                  | 18 | -0.0495 | 0.2194 | 0.8243 | 0.0191  | 0.0538 | 0.7267 | 30.0059 | 0.0180 | -15.5304 |
| LargeArteryStroke | g_Treponema            | Weighted median           | 18 | 0.0420  | 0.0782 | 0.5912 | 0.0191  | 0.0538 | 0.7267 | 30.0059 | 0.0180 | -15.5304 |
| LargeArteryStroke | g_Treponema            | Inverse variance weighted | 18 | 0.0242  | 0.0702 | 0.7304 | 0.0191  | 0.0538 | 0.7267 | 30.0059 | 0.0180 | -15.5304 |
| LargeArteryStroke | g_Treponema            | Simple mode               | 18 | 0.0259  | 0.1310 | 0.8455 | 0.0191  | 0.0538 | 0.7267 | 30.0059 | 0.0180 | -15.5304 |
| LargeArteryStroke | g_Treponema            | Weighted mode             | 18 | 0.0310  | 0.1216 | 0.8021 | 0.0191  | 0.0538 | 0.7267 | 30.0059 | 0.0180 | -15.5304 |
| LargeArteryStroke | g_Turicibacter         | MR Egger                  | 18 | 0.7225  | 0.3670 | 0.0666 | -0.1725 | 0.0900 | 0.0733 | 18.8841 | 0.3352 | -8.8332  |
| LargeArteryStroke | g_Turicibacter         | Weighted median           | 18 | -0.0369 | 0.1719 | 0.8302 | -0.1725 | 0.0900 | 0.0733 | 18.8841 | 0.3352 | -8.8332  |
| LargeArteryStroke | g_Turicibacter         | Inverse variance weighted | 18 | 0.0580  | 0.1270 | 0.6478 | -0.1725 | 0.0900 | 0.0733 | 18.8841 | 0.3352 | -8.8332  |
| LargeArteryStroke | g_Turicibacter         | Simple mode               | 18 | -0.1860 | 0.3107 | 0.5573 | -0.1725 | 0.0900 | 0.0733 | 18.8841 | 0.3352 | -8.8332  |
| LargeArteryStroke | g_Turicibacter         | Weighted mode             | 18 | -0.1233 | 0.3127 | 0.6981 | -0.1725 | 0.0900 | 0.0733 | 18.8841 | 0.3352 | -8.8332  |
| LargeArteryStroke | g_Veillonella          | MR Egger                  | 18 | -0.2090 | 0.2464 | 0.4089 | 0.0343  | 0.0604 | 0.5786 | 10.9998 | 0.8095 | -32.6849 |
| LargeArteryStroke | g_Veillonella          | Weighted median           | 18 | -0.0682 | 0.1050 | 0.5158 | 0.0343  | 0.0604 | 0.5786 | 10.9998 | 0.8095 | -32.6849 |
| LargeArteryStroke | g_Veillonella          | Inverse variance weighted | 18 | -0.0770 | 0.0809 | 0.3413 | 0.0343  | 0.0604 | 0.5786 | 10.9998 | 0.8095 | -32.6849 |
| LargeArteryStroke | g_Veillonella          | Simple mode               | 18 | -0.1105 | 0.1628 | 0.5064 | 0.0343  | 0.0604 | 0.5786 | 10.9998 | 0.8095 | -32.6849 |
| LargeArteryStroke | g_Veillonella          | Weighted mode             | 18 | -0.1067 | 0.1625 | 0.5204 | 0.0343  | 0.0604 | 0.5786 | 10.9998 | 0.8095 | -32.6849 |
| LargeArteryStroke | g_Vibrio               | MR Egger                  | 18 | 0.2301  | 0.4395 | 0.6077 | -0.0370 | 0.1078 | 0.7355 | 27.4240 | 0.0370 | -0.7276  |
| LargeArteryStroke | g_Vibrio               | Weighted median           | 18 | 0.1582  | 0.1557 | 0.3097 | -0.0370 | 0.1078 | 0.7355 | 27.4240 | 0.0370 | -0.7276  |
| LargeArteryStroke | g_Vibrio               | Inverse variance weighted | 18 | 0.0874  | 0.1405 | 0.5337 | -0.0370 | 0.1078 | 0.7355 | 27.4240 | 0.0370 | -0.7276  |
| LargeArteryStroke | g_Vibrio               | Simple mode               | 18 | -0.2658 | 0.2336 | 0.2709 | -0.0370 | 0.1078 | 0.7355 | 27.4240 | 0.0370 | -0.7276  |
| LargeArteryStroke | g_Vibrio               | Weighted mode             | 18 | 0.2127  | 0.2631 | 0.4300 | -0.0370 | 0.1078 | 0.7355 | 27.4240 | 0.0370 | -0.7276  |
| LargeArteryStroke | log_f_Aeromonadaceae   | MR Egger                  | 18 | 0.6020  | 0.3119 | 0.0715 | -0.1711 | 0.0764 | 0.0396 | 19.6582 | 0.2921 | -0.9401  |
| LargeArteryStroke | log_f_Aeromonadaceae   | Weighted median           | 18 | -0.0441 | 0.1471 | 0.7644 | -0.1711 | 0.0764 | 0.0396 | 19.6582 | 0.2921 | -0.9401  |
| LargeArteryStroke | log_f_Aeromonadaceae   | Inverse variance weighted | 18 | -0.0581 | 0.1099 | 0.5970 | -0.1711 | 0.0764 | 0.0396 | 19.6582 | 0.2921 | -0.9401  |
| LargeArteryStroke | log_f_Aeromonadaceae   | Simple mode               | 18 | 0.1016  | 0.2546 | 0.6948 | -0.1711 | 0.0764 | 0.0396 | 19.6582 | 0.2921 | -0.9401  |
| LargeArteryStroke | log_f_Aeromonadaceae   | Weighted mode             | 18 | 0.1343  | 0.2397 | 0.5827 | -0.1711 | 0.0764 | 0.0396 | 19.6582 | 0.2921 | -0.9401  |
| LargeArteryStroke | log_f_Alcaligenaceae   | MR Egger                  | 18 | 0.4876  | 0.3109 | 0.1364 | -0.1187 | 0.0762 | 0.1387 | 15.5372 | 0.5568 | -16.2051 |
| LargeArteryStroke | log_f_Alcaligenaceae   | Weighted median           | 18 | -0.0057 | 0.1437 | 0.9681 | -0.1187 | 0.0762 | 0.1387 | 15.5372 | 0.5568 | -16.2051 |
| LargeArteryStroke | log_f_Alcaligenaceae   | Inverse variance weighted | 18 | 0.0300  | 0.1020 | 0.7689 | -0.1187 | 0.0762 | 0.1387 | 15.5372 | 0.5568 | -16.2051 |
| LargeArteryStroke | log_f_Alcaligenaceae   | Simple mode               | 18 | -0.0908 | 0.2536 | 0.7247 | -0.1187 | 0.0762 | 0.1387 | 15.5372 | 0.5568 | -16.2051 |
| LargeArteryStroke | log_f_Alcaligenaceae   | Weighted mode             | 18 | -0.0854 | 0.2577 | 0.7444 | -0.1187 | 0.0762 | 0.1387 | 15.5372 | 0.5568 | -16.2051 |
| LargeArteryStroke | log_f_Brachyspiraceae  | MR Egger                  | 18 | -0.1999 | 0.4520 | 0.6642 | 0.0681  | 0.1107 | 0.5469 | 32.5534 | 0.0085 | -0.9614  |
| LargeArteryStroke | log_f_Brachyspiraceae  | Weighted median           | 18 | 0.1658  | 0.1636 | 0.3109 | 0.0681  | 0.1107 | 0.5469 | 32.5534 | 0.0085 | -0.9614  |
| LargeArteryStroke | log_f_Brachyspiraceae  | Inverse variance weighted | 18 | 0.0629  | 0.1454 | 0.6653 | 0.0681  | 0.1107 | 0.5469 | 32.5534 | 0.0085 | -0.9614  |
| LargeArteryStroke | log_f_Brachyspiraceae  | Simple mode               | 18 | 0.2828  | 0.3361 | 0.4118 | 0.0681  | 0.1107 | 0.5469 | 32.5534 | 0.0085 | -0.9614  |
| LargeArteryStroke | log_f_Brachyspiraceae  | Weighted mode             | 18 | 0.2918  | 0.3219 | 0.3773 | 0.0681  | 0.1107 | 0.5469 | 32.5534 | 0.0085 | -0.9614  |
| LargeArteryStroke | log_f_Comamonadaceae   | MR Egger                  | 18 | -0.1140 | 0.3113 | 0.7191 | 0.0153  | 0.0763 | 0.8436 | 11.3510 | 0.7873 | -10.2376 |
| LargeArteryStroke | log_f_Comamonadaceae   | Weighted median           | 18 | -0.0753 | 0.1409 | 0.5932 | 0.0153  | 0.0763 | 0.8436 | 11.3510 | 0.7873 | -10.2376 |
| LargeArteryStroke | log_f_Comamonadaceae   | Inverse variance weighted | 18 | -0.0550 | 0.1020 | 0.5899 | 0.0153  | 0.0763 | 0.8436 | 11.3510 | 0.7873 | -10.2376 |
| LargeArteryStroke | log_f_Comamonadaceae   | Simple mode               | 18 | -0.2085 | 0.2555 | 0.4258 | 0.0153  | 0.0763 | 0.8436 | 11.3510 | 0.7873 | -10.2376 |
| LargeArteryStroke | log_f_Comamonadaceae   | Weighted mode             | 18 | -0.2256 | 0.2510 | 0.3811 | 0.0153  | 0.0763 | 0.8436 | 11.3510 | 0.7873 | -10.2376 |
| LargeArteryStroke | log_f_Moraxellaceae    | MR Egger                  | 18 | 0.3044  | 0.3644 | 0.4157 | -0.0662 | 0.0893 | 0.4690 | 21.9349 | 0.1453 | -0.7598  |
| LargeArteryStroke | log_f_Moraxellaceae    | Weighted median           | 18 | 0.0058  | 0.1431 | 0.9674 | -0.0662 | 0.0893 | 0.4690 | 21.9349 | 0.1453 | -0.7598  |
| LargeArteryStroke | log_f_Moraxellaceae    | Inverse variance weighted | 18 | 0.0491  | 0.1180 | 0.6771 | -0.0662 | 0.0893 | 0.4690 | 21.9349 | 0.1453 | -0.7598  |
| LargeArteryStroke | log_f_Moraxellaceae    | Simple mode               | 18 | -0.1272 | 0.2551 | 0.6244 | -0.0662 | 0.0893 | 0.4690 | 21.9349 | 0.1453 | -0.7598  |
| LargeArteryStroke | log_f_Moraxellaceae    | Weighted mode             | 18 | -0.0121 | 0.2453 | 0.9614 | -0.0662 | 0.0893 | 0.4690 | 21.9349 | 0.1453 | -0.7598  |
| LargeArteryStroke | log_f_Paenibacillaceae | MR Egger                  | 18 | -0.1785 | 0.3843 | 0.6485 | 0.0468  | 0.0941 | 0.6258 | 23.6757 | 0.0968 | -5.9891  |
| LargeArteryStroke | log_f_Paenibacillaceae | Weighted median           | 18 | -0.0478 | 0.1583 | 0.7627 | 0.0468  | 0.0941 | 0.6258 | 23.6757 | 0.0968 | -5.9891  |
| LargeArteryStroke | log_f_Paenibacillaceae | Inverse variance weighted | 18 | 0.0020  | 0.1228 | 0.9869 | 0.0468  | 0.0941 | 0.6258 | 23.6757 | 0.0968 | -5.9891  |
| LargeArteryStroke | log_f_Paenibacillaceae | Simple mode               | 18 | -0.1088 | 0.3090 | 0.7292 | 0.0468  | 0.0941 | 0.6258 | 23.6757 | 0.0968 | -5.9891  |
| LargeArteryStroke | log_f_Paenibacillaceae | Weighted mode             | 18 | -0.1025 | 0.2950 | 0.7325 | 0.0468  | 0.0941 | 0.6258 | 23.6757 | 0.0968 | -5.9891  |
| LargeArteryStroke | log_f_Peptococcaceae   | MR Egger                  | 18 | -0.2872 | 0.3122 | 0.3713 | 0.0926  | 0.0765 | 0.2437 | 15.3416 | 0.5709 | -26.8437 |
| LargeArteryStroke | log_f_Peptococcaceae   | Weighted median           | 18 | 0.0096  | 0.1495 | 0.9487 | 0.0926  | 0.0765 | 0.2437 | 15.3416 | 0.5709 | -26.8437 |
| LargeArteryStroke | log_f_Peptococcaceae   | Inverse variance weighted | 18 | 0.0698  | 0.1025 | 0.4960 | 0.0926  | 0.0765 | 0.2437 | 15.3416 | 0.5709 | -26.8437 |
| LargeArteryStroke | log_f_Peptococcaceae   | Simple mode               | 18 | -0.0622 | 0.3053 | 0.8410 | 0.0926  | 0.0765 | 0.2437 | 15.3416 | 0.5709 | -26.8437 |

|                   |                               |                           |    |         |        |        |         |        |        |         |        |          |
|-------------------|-------------------------------|---------------------------|----|---------|--------|--------|---------|--------|--------|---------|--------|----------|
| LargeArteryStroke | log_f_Peptococcaceae          | Weighted mode             | 18 | -0.0723 | 0.2707 | 0.7926 | 0.0926  | 0.0765 | 0.2437 | 15.3416 | 0.5709 | -26.8437 |
| LargeArteryStroke | log_f_Pseudomonadaceae        | MR Egger                  | 18 | 0.5808  | 0.3484 | 0.1149 | -0.1268 | 0.0853 | 0.1567 | 22.6502 | 0.1610 | -1.5615  |
| LargeArteryStroke | log_f_Pseudomonadaceae        | Weighted median           | 18 | 0.0811  | 0.1509 | 0.5910 | -0.1268 | 0.0853 | 0.1567 | 22.6502 | 0.1610 | -1.5615  |
| LargeArteryStroke | log_f_Pseudomonadaceae        | Inverse variance weighted | 18 | 0.0918  | 0.1184 | 0.4380 | -0.1268 | 0.0853 | 0.1567 | 22.6502 | 0.1610 | -1.5615  |
| LargeArteryStroke | log_f_Pseudomonadaceae        | Simple mode               | 18 | 0.0971  | 0.2466 | 0.6987 | -0.1268 | 0.0853 | 0.1567 | 22.6502 | 0.1610 | -1.5615  |
| LargeArteryStroke | log_f_Pseudomonadaceae        | Weighted mode             | 18 | 0.0798  | 0.2404 | 0.7439 | -0.1268 | 0.0853 | 0.1567 | 22.6502 | 0.1610 | -1.5615  |
| LargeArteryStroke | log_f_Rhodocyclaceae          | MR Egger                  | 18 | 0.2104  | 0.3113 | 0.5088 | -0.0615 | 0.0763 | 0.4323 | 14.5771 | 0.5558 | -1.4811  |
| LargeArteryStroke | log_f_Rhodocyclaceae          | Weighted median           | 18 | 0.0159  | 0.1452 | 0.9128 | -0.0615 | 0.0763 | 0.4323 | 14.5771 | 0.5558 | -1.4811  |
| LargeArteryStroke | log_f_Rhodocyclaceae          | Inverse variance weighted | 18 | -0.0265 | 0.1022 | 0.7951 | -0.0615 | 0.0763 | 0.4323 | 14.5771 | 0.5558 | -1.4811  |
| LargeArteryStroke | log_f_Rhodocyclaceae          | Simple mode               | 18 | 0.2348  | 0.2443 | 0.3498 | -0.0615 | 0.0763 | 0.4323 | 14.5771 | 0.5558 | -1.4811  |
| LargeArteryStroke | log_f_Rhodocyclaceae          | Weighted mode             | 18 | 0.2198  | 0.2301 | 0.3530 | -0.0615 | 0.0763 | 0.4323 | 14.5771 | 0.5558 | -1.4811  |
| LargeArteryStroke | log_f_Succinivibrionaceae     | MR Egger                  | 18 | -0.2334 | 0.3193 | 0.4753 | 0.0497  | 0.0781 | 0.5339 | 16.7659 | 0.4009 | -0.2985  |
| LargeArteryStroke | log_f_Succinivibrionaceae     | Weighted median           | 18 | 0.0404  | 0.1446 | 0.7800 | 0.0497  | 0.0781 | 0.5339 | 16.7659 | 0.4009 | -0.2985  |
| LargeArteryStroke | log_f_Succinivibrionaceae     | Inverse variance weighted | 18 | -0.0416 | 0.1026 | 0.6852 | 0.0497  | 0.0781 | 0.5339 | 16.7659 | 0.4009 | -0.2985  |
| LargeArteryStroke | log_f_Succinivibrionaceae     | Simple mode               | 18 | 0.0562  | 0.2359 | 0.8144 | 0.0497  | 0.0781 | 0.5339 | 16.7659 | 0.4009 | -0.2985  |
| LargeArteryStroke | log_f_Succinivibrionaceae     | Weighted mode             | 18 | 0.0562  | 0.2180 | 0.7995 | 0.0497  | 0.0781 | 0.5339 | 16.7659 | 0.4009 | -0.2985  |
| LargeArteryStroke | log_f_Thermoanaerobacteraceae | MR Egger                  | 18 | -0.6205 | 0.3578 | 0.1021 | 0.1598  | 0.0877 | 0.0873 | 24.8537 | 0.0980 | -0.2788  |
| LargeArteryStroke | log_f_Thermoanaerobacteraceae | Weighted median           | 18 | -0.0326 | 0.1387 | 0.8144 | 0.1598  | 0.0877 | 0.0873 | 24.8537 | 0.0980 | -0.2788  |
| LargeArteryStroke | log_f_Thermoanaerobacteraceae | Inverse variance weighted | 18 | -0.0052 | 0.1255 | 0.9672 | 0.1598  | 0.0877 | 0.0873 | 24.8537 | 0.0980 | -0.2788  |
| LargeArteryStroke | log_f_Thermoanaerobacteraceae | Simple mode               | 18 | -0.0655 | 0.2242 | 0.7738 | 0.1598  | 0.0877 | 0.0873 | 24.8537 | 0.0980 | -0.2788  |
| LargeArteryStroke | log_f_Thermoanaerobacteraceae | Weighted mode             | 18 | -0.0359 | 0.2199 | 0.8722 | 0.1598  | 0.0877 | 0.0873 | 24.8537 | 0.0980 | -0.2788  |
| LargeArteryStroke | log_g_Acetivibrio             | MR Egger                  | 18 | -0.3007 | 0.3587 | 0.4141 | 0.0949  | 0.0879 | 0.2964 | 22.4448 | 0.1682 | -12.2608 |
| LargeArteryStroke | log_g_Acetivibrio             | Weighted median           | 18 | 0.1110  | 0.1468 | 0.4495 | 0.0949  | 0.0879 | 0.2964 | 22.4448 | 0.1682 | -12.2608 |
| LargeArteryStroke | log_g_Acetivibrio             | Inverse variance weighted | 18 | 0.0649  | 0.1185 | 0.5835 | 0.0949  | 0.0879 | 0.2964 | 22.4448 | 0.1682 | -12.2608 |
| LargeArteryStroke | log_g_Acetivibrio             | Simple mode               | 18 | 0.1945  | 0.2952 | 0.5188 | 0.0949  | 0.0879 | 0.2964 | 22.4448 | 0.1682 | -12.2608 |
| LargeArteryStroke | log_g_Acetivibrio             | Weighted mode             | 18 | 0.1375  | 0.2700 | 0.6170 | 0.0949  | 0.0879 | 0.2964 | 22.4448 | 0.1682 | -12.2608 |
| LargeArteryStroke | log_g_Achromobacter           | MR Egger                  | 18 | 0.4235  | 0.3113 | 0.1925 | -0.1019 | 0.0763 | 0.2004 | 11.3816 | 0.8361 | -35.8051 |
| LargeArteryStroke | log_g_Achromobacter           | Weighted median           | 18 | 0.0860  | 0.1423 | 0.5458 | -0.1019 | 0.0763 | 0.2004 | 11.3816 | 0.8361 | -35.8051 |
| LargeArteryStroke | log_g_Achromobacter           | Inverse variance weighted | 18 | 0.0308  | 0.1022 | 0.7631 | -0.1019 | 0.0763 | 0.2004 | 11.3816 | 0.8361 | -35.8051 |
| LargeArteryStroke | log_g_Achromobacter           | Simple mode               | 18 | 0.1144  | 0.2438 | 0.6448 | -0.1019 | 0.0763 | 0.2004 | 11.3816 | 0.8361 | -35.8051 |
| LargeArteryStroke | log_g_Achromobacter           | Weighted mode             | 18 | 0.1637  | 0.2388 | 0.5022 | -0.1019 | 0.0763 | 0.2004 | 11.3816 | 0.8361 | -35.8051 |
| LargeArteryStroke | log_g_Acidovorax              | MR Egger                  | 18 | 0.2867  | 0.3115 | 0.3710 | -0.1185 | 0.0763 | 0.1397 | 17.6810 | 0.4092 | -9.9569  |
| LargeArteryStroke | log_g_Acidovorax              | Weighted median           | 18 | -0.0570 | 0.1497 | 0.7035 | -0.1185 | 0.0763 | 0.1397 | 17.6810 | 0.4092 | -9.9569  |
| LargeArteryStroke | log_g_Acidovorax              | Inverse variance weighted | 18 | -0.1709 | 0.1037 | 0.0993 | -0.1185 | 0.0763 | 0.1397 | 17.6810 | 0.4092 | -9.9569  |
| LargeArteryStroke | log_g_Acidovorax              | Simple mode               | 18 | -0.0507 | 0.2804 | 0.8586 | -0.1185 | 0.0763 | 0.1397 | 17.6810 | 0.4092 | -9.9569  |
| LargeArteryStroke | log_g_Acidovorax              | Weighted mode             | 18 | -0.0397 | 0.2719 | 0.8857 | -0.1185 | 0.0763 | 0.1397 | 17.6810 | 0.4092 | -9.9569  |
| LargeArteryStroke | log_g_Actinobacillus          | MR Egger                  | 18 | -0.6520 | 0.3135 | 0.0540 | 0.1534  | 0.0768 | 0.0631 | 19.0277 | 0.3269 | -3.7895  |
| LargeArteryStroke | log_g_Actinobacillus          | Weighted median           | 18 | -0.0442 | 0.1456 | 0.7615 | 0.1534  | 0.0768 | 0.0631 | 19.0277 | 0.3269 | -3.7895  |
| LargeArteryStroke | log_g_Actinobacillus          | Inverse variance weighted | 18 | -0.0605 | 0.1086 | 0.5778 | 0.1534  | 0.0768 | 0.0631 | 19.0277 | 0.3269 | -3.7895  |
| LargeArteryStroke | log_g_Actinobacillus          | Simple mode               | 18 | -0.1086 | 0.2269 | 0.6383 | 0.1534  | 0.0768 | 0.0631 | 19.0277 | 0.3269 | -3.7895  |
| LargeArteryStroke | log_g_Actinobacillus          | Weighted mode             | 18 | -0.0304 | 0.2131 | 0.8883 | 0.1534  | 0.0768 | 0.0631 | 19.0277 | 0.3269 | -3.7895  |
| LargeArteryStroke | log_g_Alkaliphilus            | MR Egger                  | 18 | -0.3613 | 0.3697 | 0.3430 | 0.0848  | 0.0904 | 0.3623 | 23.1504 | 0.1444 | -0.3939  |
| LargeArteryStroke | log_g_Alkaliphilus            | Weighted median           | 18 | 0.0595  | 0.1456 | 0.6826 | 0.0848  | 0.0904 | 0.3623 | 23.1504 | 0.1444 | -0.3939  |
| LargeArteryStroke | log_g_Alkaliphilus            | Inverse variance weighted | 18 | -0.0337 | 0.1205 | 0.7800 | 0.0848  | 0.0904 | 0.3623 | 23.1504 | 0.1444 | -0.3939  |
| LargeArteryStroke | log_g_Alkaliphilus            | Simple mode               | 18 | 0.1007  | 0.2541 | 0.6968 | 0.0848  | 0.0904 | 0.3623 | 23.1504 | 0.1444 | -0.3939  |
| LargeArteryStroke | log_g_Alkaliphilus            | Weighted mode             | 18 | 0.1110  | 0.2231 | 0.6251 | 0.0848  | 0.0904 | 0.3623 | 23.1504 | 0.1444 | -0.3939  |
| LargeArteryStroke | log_g_Cellulosilyticum        | MR Egger                  | 18 | 0.1675  | 0.3105 | 0.5969 | -0.0254 | 0.0761 | 0.7424 | 15.5948 | 0.4816 | -0.8577  |
| LargeArteryStroke | log_g_Cellulosilyticum        | Weighted median           | 18 | 0.0246  | 0.1364 | 0.8567 | -0.0254 | 0.0761 | 0.7424 | 15.5948 | 0.4816 | -0.8577  |
| LargeArteryStroke | log_g_Cellulosilyticum        | Inverse variance weighted | 18 | 0.0694  | 0.1017 | 0.4948 | -0.0254 | 0.0761 | 0.7424 | 15.5948 | 0.4816 | -0.8577  |
| LargeArteryStroke | log_g_Cellulosilyticum        | Simple mode               | 18 | 0.0286  | 0.2370 | 0.9055 | -0.0254 | 0.0761 | 0.7424 | 15.5948 | 0.4816 | -0.8577  |
| LargeArteryStroke | log_g_Cellulosilyticum        | Weighted mode             | 18 | 0.0286  | 0.2189 | 0.8978 | -0.0254 | 0.0761 | 0.7424 | 15.5948 | 0.4816 | -0.8577  |
| LargeArteryStroke | log_g_Cronobacter             | MR Egger                  | 18 | 0.4186  | 0.3511 | 0.2506 | -0.1336 | 0.0860 | 0.1401 | 23.5156 | 0.1332 | -0.8322  |
| LargeArteryStroke | log_g_Cronobacter             | Weighted median           | 18 | -0.0287 | 0.1418 | 0.8396 | -0.1336 | 0.0860 | 0.1401 | 23.5156 | 0.1332 | -0.8322  |
| LargeArteryStroke | log_g_Cronobacter             | Inverse variance weighted | 18 | -0.0964 | 0.1199 | 0.4217 | -0.1336 | 0.0860 | 0.1401 | 23.5156 | 0.1332 | -0.8322  |
| LargeArteryStroke | log_g_Cronobacter             | Simple mode               | 18 | -0.0632 | 0.2612 | 0.8118 | -0.1336 | 0.0860 | 0.1401 | 23.5156 | 0.1332 | -0.8322  |
| LargeArteryStroke | log_g_Cronobacter             | Weighted mode             | 18 | 0.0458  | 0.2822 | 0.8731 | -0.1336 | 0.0860 | 0.1401 | 23.5156 | 0.1332 | -0.8322  |
| LargeArteryStroke | log_g_Dickeya                 | MR Egger                  | 18 | 0.6161  | 0.3962 | 0.1395 | -0.2067 | 0.0971 | 0.0492 | 33.4842 | 0.0098 | -1.5081  |
| LargeArteryStroke | log_g_Dickeya                 | Weighted median           | 18 | -0.1586 | 0.1568 | 0.3120 | -0.2067 | 0.0971 | 0.0492 | 33.4842 | 0.0098 | -1.5081  |
| LargeArteryStroke | log_g_Dickeya                 | Inverse variance weighted | 18 | -0.1802 | 0.1430 | 0.2074 | -0.2067 | 0.0971 | 0.0492 | 33.4842 | 0.0098 | -1.5081  |
| LargeArteryStroke | log_g_Dickeya                 | Simple mode               | 18 | -0.1694 | 0.2676 | 0.5351 | -0.2067 | 0.0971 | 0.0492 | 33.4842 | 0.0098 | -1.5081  |
| LargeArteryStroke | log_g_Dickeya                 | Weighted mode             | 18 | -0.1255 | 0.2452 | 0.6153 | -0.2067 | 0.0971 | 0.0492 | 33.4842 | 0.0098 | -1.5081  |

|                   |                      |                           |    |         |        |        |         |        |        |         |        |          |
|-------------------|----------------------|---------------------------|----|---------|--------|--------|---------|--------|--------|---------|--------|----------|
| LargeArteryStroke | log_g_Dysgonomonas   | MR Egger                  | 18 | -0.1888 | 0.3124 | 0.5541 | 0.0569  | 0.0765 | 0.4677 | 13.6345 | 0.6259 | -6.6301  |
| LargeArteryStroke | log_g_Dysgonomonas   | Weighted median           | 18 | -0.0794 | 0.1391 | 0.5681 | 0.0569  | 0.0765 | 0.4677 | 13.6345 | 0.6259 | -6.6301  |
| LargeArteryStroke | log_g_Dysgonomonas   | Inverse variance weighted | 18 | 0.0308  | 0.1023 | 0.7632 | 0.0569  | 0.0765 | 0.4677 | 13.6345 | 0.6259 | -6.6301  |
| LargeArteryStroke | log_g_Dysgonomonas   | Simple mode               | 18 | -0.1293 | 0.2305 | 0.5822 | 0.0569  | 0.0765 | 0.4677 | 13.6345 | 0.6259 | -6.6301  |
| LargeArteryStroke | log_g_Dysgonomonas   | Weighted mode             | 18 | -0.1073 | 0.2249 | 0.6392 | 0.0569  | 0.0765 | 0.4677 | 13.6345 | 0.6259 | -6.6301  |
| LargeArteryStroke | log_g_Edwardsiella   | MR Egger                  | 18 | 0.5246  | 0.4285 | 0.2386 | -0.1096 | 0.1048 | 0.3112 | 32.1698 | 0.0143 | -0.4459  |
| LargeArteryStroke | log_g_Edwardsiella   | Weighted median           | 18 | 0.1148  | 0.1504 | 0.4451 | -0.1096 | 0.1048 | 0.3112 | 32.1698 | 0.0143 | -0.4459  |
| LargeArteryStroke | log_g_Edwardsiella   | Inverse variance weighted | 18 | 0.1011  | 0.1407 | 0.4721 | -0.1096 | 0.1048 | 0.3112 | 32.1698 | 0.0143 | -0.4459  |
| LargeArteryStroke | log_g_Edwardsiella   | Simple mode               | 18 | 0.1427  | 0.2542 | 0.5820 | -0.1096 | 0.1048 | 0.3112 | 32.1698 | 0.0143 | -0.4459  |
| LargeArteryStroke | log_g_Edwardsiella   | Weighted mode             | 18 | 0.1537  | 0.2441 | 0.5372 | -0.1096 | 0.1048 | 0.3112 | 32.1698 | 0.0143 | -0.4459  |
| LargeArteryStroke | log_g_Epulopiscium   | MR Egger                  | 18 | -0.1090 | 0.3377 | 0.7511 | 0.0440  | 0.0828 | 0.6026 | 18.6704 | 0.2861 | -17.1513 |
| LargeArteryStroke | log_g_Epulopiscium   | Weighted median           | 18 | 0.0454  | 0.1425 | 0.7498 | 0.0440  | 0.0828 | 0.6026 | 18.6704 | 0.2861 | -17.1513 |
| LargeArteryStroke | log_g_Epulopiscium   | Inverse variance weighted | 18 | 0.0604  | 0.1085 | 0.5777 | 0.0440  | 0.0828 | 0.6026 | 18.6704 | 0.2861 | -17.1513 |
| LargeArteryStroke | log_g_Epulopiscium   | Simple mode               | 18 | 0.0344  | 0.2560 | 0.8946 | 0.0440  | 0.0828 | 0.6026 | 18.6704 | 0.2861 | -17.1513 |
| LargeArteryStroke | log_g_Epulopiscium   | Weighted mode             | 18 | 0.0344  | 0.2579 | 0.8954 | 0.0440  | 0.0828 | 0.6026 | 18.6704 | 0.2861 | -17.1513 |
| LargeArteryStroke | log_g_Eremococcus    | MR Egger                  | 18 | 0.4550  | 0.3428 | 0.2030 | -0.0710 | 0.0839 | 0.4100 | 19.3330 | 0.2518 | -4.4383  |
| LargeArteryStroke | log_g_Eremococcus    | Weighted median           | 18 | 0.1409  | 0.1528 | 0.3565 | -0.0710 | 0.0839 | 0.4100 | 19.3330 | 0.2518 | -4.4383  |
| LargeArteryStroke | log_g_Eremococcus    | Inverse variance weighted | 18 | 0.1809  | 0.1112 | 0.1036 | -0.0710 | 0.0839 | 0.4100 | 19.3330 | 0.2518 | -4.4383  |
| LargeArteryStroke | log_g_Eremococcus    | Simple mode               | 18 | 0.1806  | 0.2953 | 0.5490 | -0.0710 | 0.0839 | 0.4100 | 19.3330 | 0.2518 | -4.4383  |
| LargeArteryStroke | log_g_Eremococcus    | Weighted mode             | 18 | 0.1412  | 0.2671 | 0.6040 | -0.0710 | 0.0839 | 0.4100 | 19.3330 | 0.2518 | -4.4383  |
| LargeArteryStroke | log_g_Erwinia        | MR Egger                  | 18 | 0.1054  | 0.3427 | 0.7623 | -0.0354 | 0.0839 | 0.6793 | 19.3141 | 0.2527 | -0.4279  |
| LargeArteryStroke | log_g_Erwinia        | Weighted median           | 18 | -0.0989 | 0.1484 | 0.5051 | -0.0354 | 0.0839 | 0.6793 | 19.3141 | 0.2527 | -0.4279  |
| LargeArteryStroke | log_g_Erwinia        | Inverse variance weighted | 18 | -0.0309 | 0.1097 | 0.7782 | -0.0354 | 0.0839 | 0.6793 | 19.3141 | 0.2527 | -0.4279  |
| LargeArteryStroke | log_g_Erwinia        | Simple mode               | 18 | -0.3133 | 0.2411 | 0.2112 | -0.0354 | 0.0839 | 0.6793 | 19.3141 | 0.2527 | -0.4279  |
| LargeArteryStroke | log_g_Erwinia        | Weighted mode             | 18 | -0.2016 | 0.2528 | 0.4362 | -0.0354 | 0.0839 | 0.6793 | 19.3141 | 0.2527 | -0.4279  |
| LargeArteryStroke | log_g_Ethanoligenens | MR Egger                  | 18 | -0.3819 | 0.3197 | 0.2497 | 0.1024  | 0.0783 | 0.2098 | 18.2467 | 0.3734 | -2.6157  |
| LargeArteryStroke | log_g_Ethanoligenens | Weighted median           | 18 | -0.0367 | 0.1413 | 0.7949 | 0.1024  | 0.0783 | 0.2098 | 18.2467 | 0.3734 | -2.6157  |
| LargeArteryStroke | log_g_Ethanoligenens | Inverse variance weighted | 18 | 0.0126  | 0.1073 | 0.9063 | 0.1024  | 0.0783 | 0.2098 | 18.2467 | 0.3734 | -2.6157  |
| LargeArteryStroke | log_g_Ethanoligenens | Simple mode               | 18 | -0.0753 | 0.2421 | 0.7594 | 0.1024  | 0.0783 | 0.2098 | 18.2467 | 0.3734 | -2.6157  |
| LargeArteryStroke | log_g_Ethanoligenens | Weighted mode             | 18 | -0.0753 | 0.2076 | 0.7212 | 0.1024  | 0.0783 | 0.2098 | 18.2467 | 0.3734 | -2.6157  |
| LargeArteryStroke | log_g_Filifactor     | MR Egger                  | 18 | -0.1753 | 0.3211 | 0.5927 | 0.0671  | 0.0787 | 0.4063 | 17.0986 | 0.3792 | -26.2153 |
| LargeArteryStroke | log_g_Filifactor     | Weighted median           | 18 | 0.1452  | 0.1450 | 0.3165 | 0.0671  | 0.0787 | 0.4063 | 17.0986 | 0.3792 | -26.2153 |
| LargeArteryStroke | log_g_Filifactor     | Inverse variance weighted | 18 | 0.0834  | 0.1045 | 0.4247 | 0.0671  | 0.0787 | 0.4063 | 17.0986 | 0.3792 | -26.2153 |
| LargeArteryStroke | log_g_Filifactor     | Simple mode               | 18 | 0.2734  | 0.2802 | 0.3429 | 0.0671  | 0.0787 | 0.4063 | 17.0986 | 0.3792 | -26.2153 |
| LargeArteryStroke | log_g_Filifactor     | Weighted mode             | 18 | 0.3114  | 0.2666 | 0.2590 | 0.0671  | 0.0787 | 0.4063 | 17.0986 | 0.3792 | -26.2153 |
| LargeArteryStroke | log_g_Finegoldia     | MR Egger                  | 18 | -0.2399 | 0.3142 | 0.4562 | 0.0945  | 0.0770 | 0.2378 | 13.3688 | 0.7112 | -17.1922 |
| LargeArteryStroke | log_g_Finegoldia     | Weighted median           | 18 | 0.0120  | 0.1441 | 0.9338 | 0.0945  | 0.0770 | 0.2378 | 13.3688 | 0.7112 | -17.1922 |
| LargeArteryStroke | log_g_Finegoldia     | Inverse variance weighted | 18 | 0.1241  | 0.1031 | 0.2290 | 0.0945  | 0.0770 | 0.2378 | 13.3688 | 0.7112 | -17.1922 |
| LargeArteryStroke | log_g_Finegoldia     | Simple mode               | 18 | -0.0419 | 0.2658 | 0.8767 | 0.0945  | 0.0770 | 0.2378 | 13.3688 | 0.7112 | -17.1922 |
| LargeArteryStroke | log_g_Finegoldia     | Weighted mode             | 18 | -0.0468 | 0.2497 | 0.8534 | 0.0945  | 0.0770 | 0.2378 | 13.3688 | 0.7112 | -17.1922 |
| LargeArteryStroke | log_g_Gardnerella    | MR Egger                  | 18 | -0.0831 | 0.3184 | 0.7974 | -0.0272 | 0.0780 | 0.7319 | 11.9261 | 0.7491 | -14.9027 |
| LargeArteryStroke | log_g_Gardnerella    | Weighted median           | 18 | -0.0802 | 0.1464 | 0.5837 | -0.0272 | 0.0780 | 0.7319 | 11.9261 | 0.7491 | -14.9027 |
| LargeArteryStroke | log_g_Gardnerella    | Inverse variance weighted | 18 | -0.1879 | 0.1045 | 0.0721 | -0.0272 | 0.0780 | 0.7319 | 11.9261 | 0.7491 | -14.9027 |
| LargeArteryStroke | log_g_Gardnerella    | Simple mode               | 18 | -0.0705 | 0.2545 | 0.7852 | -0.0272 | 0.0780 | 0.7319 | 11.9261 | 0.7491 | -14.9027 |
| LargeArteryStroke | log_g_Gardnerella    | Weighted mode             | 18 | -0.0623 | 0.2207 | 0.7813 | -0.0272 | 0.0780 | 0.7319 | 11.9261 | 0.7491 | -14.9027 |
| LargeArteryStroke | log_g_Helicobacter   | MR Egger                  | 18 | -0.1825 | 0.3159 | 0.5715 | 0.0326  | 0.0774 | 0.6790 | 11.1285 | 0.8015 | -14.2973 |
| LargeArteryStroke | log_g_Helicobacter   | Weighted median           | 18 | -0.0733 | 0.1404 | 0.6015 | 0.0326  | 0.0774 | 0.6790 | 11.1285 | 0.8015 | -14.2973 |
| LargeArteryStroke | log_g_Helicobacter   | Inverse variance weighted | 18 | -0.0567 | 0.1036 | 0.5841 | 0.0326  | 0.0774 | 0.6790 | 11.1285 | 0.8015 | -14.2973 |
| LargeArteryStroke | log_g_Helicobacter   | Simple mode               | 18 | -0.1633 | 0.2466 | 0.5166 | 0.0326  | 0.0774 | 0.6790 | 11.1285 | 0.8015 | -14.2973 |
| LargeArteryStroke | log_g_Helicobacter   | Weighted mode             | 18 | -0.1689 | 0.2431 | 0.4966 | 0.0326  | 0.0774 | 0.6790 | 11.1285 | 0.8015 | -14.2973 |
| LargeArteryStroke | log_g_Histophilus    | MR Egger                  | 18 | 0.1617  | 0.3758 | 0.6727 | 0.0123  | 0.0920 | 0.8955 | 22.9903 | 0.1140 | -1.7303  |
| LargeArteryStroke | log_g_Histophilus    | Weighted median           | 18 | 0.1499  | 0.1408 | 0.2868 | 0.0123  | 0.0920 | 0.8955 | 22.9903 | 0.1140 | -1.7303  |
| LargeArteryStroke | log_g_Histophilus    | Inverse variance weighted | 18 | 0.2091  | 0.1193 | 0.0797 | 0.0123  | 0.0920 | 0.8955 | 22.9903 | 0.1140 | -1.7303  |
| LargeArteryStroke | log_g_Histophilus    | Simple mode               | 18 | 0.1300  | 0.2392 | 0.5939 | 0.0123  | 0.0920 | 0.8955 | 22.9903 | 0.1140 | -1.7303  |
| LargeArteryStroke | log_g_Histophilus    | Weighted mode             | 18 | 0.1004  | 0.2352 | 0.6748 | 0.0123  | 0.0920 | 0.8955 | 22.9903 | 0.1140 | -1.7303  |
| LargeArteryStroke | log_g_Kingella       | MR Egger                  | 18 | 0.2877  | 0.3116 | 0.3695 | -0.0956 | 0.0764 | 0.2285 | 16.8641 | 0.4636 | -4.9327  |
| LargeArteryStroke | log_g_Kingella       | Weighted median           | 18 | -0.1352 | 0.1460 | 0.3545 | -0.0956 | 0.0764 | 0.2285 | 16.8641 | 0.4636 | -4.9327  |
| LargeArteryStroke | log_g_Kingella       | Inverse variance weighted | 18 | -0.0808 | 0.1023 | 0.4292 | -0.0956 | 0.0764 | 0.2285 | 16.8641 | 0.4636 | -4.9327  |
| LargeArteryStroke | log_g_Kingella       | Simple mode               | 18 | -0.2560 | 0.2792 | 0.3719 | -0.0956 | 0.0764 | 0.2285 | 16.8641 | 0.4636 | -4.9327  |
| LargeArteryStroke | log_g_Kingella       | Weighted mode             | 18 | -0.2560 | 0.3011 | 0.4071 | -0.0956 | 0.0764 | 0.2285 | 16.8641 | 0.4636 | -4.9327  |
| LargeArteryStroke | log_g_Lawsonia       | MR Egger                  | 18 | -0.2247 | 0.3806 | 0.5632 | 0.0356  | 0.0932 | 0.7076 | 22.8240 | 0.1185 | -3.8901  |

|                   |                         |                           |    |         |        |        |         |        |        |         |        |          |
|-------------------|-------------------------|---------------------------|----|---------|--------|--------|---------|--------|--------|---------|--------|----------|
| LargeArteryStroke | log_g_Lawsonia          | Weighted median           | 18 | -0.1111 | 0.1551 | 0.4738 | 0.0356  | 0.0932 | 0.7076 | 22.8240 | 0.1185 | -3.8901  |
| LargeArteryStroke | log_g_Lawsonia          | Inverse variance weighted | 18 | -0.0874 | 0.1217 | 0.4727 | 0.0356  | 0.0932 | 0.7076 | 22.8240 | 0.1185 | -3.8901  |
| LargeArteryStroke | log_g_Lawsonia          | Simple mode               | 18 | -0.3314 | 0.2836 | 0.2586 | 0.0356  | 0.0932 | 0.7076 | 22.8240 | 0.1185 | -3.8901  |
| LargeArteryStroke | log_g_Lawsonia          | Weighted mode             | 18 | -0.2975 | 0.2584 | 0.2656 | 0.0356  | 0.0932 | 0.7076 | 22.8240 | 0.1185 | -3.8901  |
| LargeArteryStroke | log_g_Leuconostoc       | MR Egger                  | 18 | 0.3036  | 0.3542 | 0.4041 | -0.0683 | 0.0868 | 0.4428 | 20.1527 | 0.2134 | -9.8655  |
| LargeArteryStroke | log_g_Leuconostoc       | Weighted median           | 18 | -0.0482 | 0.1510 | 0.7496 | -0.0683 | 0.0868 | 0.4428 | 20.1527 | 0.2134 | -9.8655  |
| LargeArteryStroke | log_g_Leuconostoc       | Inverse variance weighted | 18 | 0.0403  | 0.1150 | 0.7260 | -0.0683 | 0.0868 | 0.4428 | 20.1527 | 0.2134 | -9.8655  |
| LargeArteryStroke | log_g_Leuconostoc       | Simple mode               | 18 | -0.1618 | 0.3035 | 0.6008 | -0.0683 | 0.0868 | 0.4428 | 20.1527 | 0.2134 | -9.8655  |
| LargeArteryStroke | log_g_Leuconostoc       | Weighted mode             | 18 | -0.1244 | 0.2742 | 0.6557 | -0.0683 | 0.0868 | 0.4428 | 20.1527 | 0.2134 | -9.8655  |
| LargeArteryStroke | log_g_Methylobacillus   | MR Egger                  | 18 | 0.2750  | 0.3120 | 0.3912 | -0.0484 | 0.0765 | 0.5358 | 13.0633 | 0.6681 | -13.2882 |
| LargeArteryStroke | log_g_Methylobacillus   | Weighted median           | 18 | -0.0914 | 0.1396 | 0.5124 | -0.0484 | 0.0765 | 0.5358 | 13.0633 | 0.6681 | -13.2882 |
| LargeArteryStroke | log_g_Methylobacillus   | Inverse variance weighted | 18 | 0.0885  | 0.1024 | 0.3874 | -0.0484 | 0.0765 | 0.5358 | 13.0633 | 0.6681 | -13.2882 |
| LargeArteryStroke | log_g_Methylobacillus   | Simple mode               | 18 | -0.1665 | 0.2458 | 0.5071 | -0.0484 | 0.0765 | 0.5358 | 13.0633 | 0.6681 | -13.2882 |
| LargeArteryStroke | log_g_Methylobacillus   | Weighted mode             | 18 | -0.1608 | 0.2457 | 0.5216 | -0.0484 | 0.0765 | 0.5358 | 13.0633 | 0.6681 | -13.2882 |
| LargeArteryStroke | log_g_Olsenella         | MR Egger                  | 18 | -0.1037 | 0.3164 | 0.7474 | 0.0198  | 0.0776 | 0.8021 | 16.1743 | 0.4409 | -16.2076 |
| LargeArteryStroke | log_g_Olsenella         | Weighted median           | 18 | 0.0269  | 0.1475 | 0.8551 | 0.0198  | 0.0776 | 0.8021 | 16.1743 | 0.4409 | -16.2076 |
| LargeArteryStroke | log_g_Olsenella         | Inverse variance weighted | 18 | -0.0275 | 0.1034 | 0.7900 | 0.0198  | 0.0776 | 0.8021 | 16.1743 | 0.4409 | -16.2076 |
| LargeArteryStroke | log_g_Olsenella         | Simple mode               | 18 | -0.3376 | 0.2944 | 0.2675 | 0.0198  | 0.0776 | 0.8021 | 16.1743 | 0.4409 | -16.2076 |
| LargeArteryStroke | log_g_Olsenella         | Weighted mode             | 18 | -0.3116 | 0.2781 | 0.2780 | 0.0198  | 0.0776 | 0.8021 | 16.1743 | 0.4409 | -16.2076 |
| LargeArteryStroke | log_g_Ornithinibacillus | MR Egger                  | 18 | 0.3472  | 0.3659 | 0.3568 | -0.0600 | 0.0895 | 0.5122 | 21.6070 | 0.1563 | -0.3153  |
| LargeArteryStroke | log_g_Ornithinibacillus | Weighted median           | 18 | 0.1202  | 0.1413 | 0.3951 | -0.0600 | 0.0895 | 0.5122 | 21.6070 | 0.1563 | -0.3153  |
| LargeArteryStroke | log_g_Ornithinibacillus | Inverse variance weighted | 18 | 0.1154  | 0.1177 | 0.3269 | -0.0600 | 0.0895 | 0.5122 | 21.6070 | 0.1563 | -0.3153  |
| LargeArteryStroke | log_g_Ornithinibacillus | Simple mode               | 18 | 0.1582  | 0.2826 | 0.5829 | -0.0600 | 0.0895 | 0.5122 | 21.6070 | 0.1563 | -0.3153  |
| LargeArteryStroke | log_g_Ornithinibacillus | Weighted mode             | 18 | 0.1377  | 0.2546 | 0.5956 | -0.0600 | 0.0895 | 0.5122 | 21.6070 | 0.1563 | -0.3153  |
| LargeArteryStroke | log_g_Paenibacillus     | MR Egger                  | 18 | -0.2618 | 0.3148 | 0.4179 | 0.0650  | 0.0772 | 0.4120 | 11.8682 | 0.7530 | -15.4238 |
| LargeArteryStroke | log_g_Paenibacillus     | Weighted median           | 18 | 0.0921  | 0.1416 | 0.5155 | 0.0650  | 0.0772 | 0.4120 | 11.8682 | 0.7530 | -15.4238 |
| LargeArteryStroke | log_g_Paenibacillus     | Inverse variance weighted | 18 | -0.0113 | 0.1034 | 0.9130 | 0.0650  | 0.0772 | 0.4120 | 11.8682 | 0.7530 | -15.4238 |
| LargeArteryStroke | log_g_Paenibacillus     | Simple mode               | 18 | 0.1620  | 0.2631 | 0.5463 | 0.0650  | 0.0772 | 0.4120 | 11.8682 | 0.7530 | -15.4238 |
| LargeArteryStroke | log_g_Paenibacillus     | Weighted mode             | 18 | 0.1574  | 0.2604 | 0.5534 | 0.0650  | 0.0772 | 0.4120 | 11.8682 | 0.7530 | -15.4238 |
| LargeArteryStroke | log_g_Pantoea           | MR Egger                  | 18 | 0.4115  | 0.4140 | 0.3350 | -0.1223 | 0.1014 | 0.2451 | 30.5321 | 0.0228 | -0.3024  |
| LargeArteryStroke | log_g_Pantoea           | Weighted median           | 18 | -0.0218 | 0.1527 | 0.8866 | -0.1223 | 0.1014 | 0.2451 | 30.5321 | 0.0228 | -0.3024  |
| LargeArteryStroke | log_g_Pantoea           | Inverse variance weighted | 18 | -0.0605 | 0.1374 | 0.6597 | -0.1223 | 0.1014 | 0.2451 | 30.5321 | 0.0228 | -0.3024  |
| LargeArteryStroke | log_g_Pantoea           | Simple mode               | 18 | -0.0029 | 0.2499 | 0.9907 | -0.1223 | 0.1014 | 0.2451 | 30.5321 | 0.0228 | -0.3024  |
| LargeArteryStroke | log_g_Pantoea           | Weighted mode             | 18 | -0.0126 | 0.2299 | 0.9571 | -0.1223 | 0.1014 | 0.2451 | 30.5321 | 0.0228 | -0.3024  |
| LargeArteryStroke | log_g_Pectobacterium    | MR Egger                  | 18 | 0.0080  | 0.3105 | 0.9797 | -0.0167 | 0.0761 | 0.8293 | 12.6084 | 0.7011 | -4.4078  |
| LargeArteryStroke | log_g_Pectobacterium    | Weighted median           | 18 | -0.0159 | 0.1392 | 0.9093 | -0.0167 | 0.0761 | 0.8293 | 12.6084 | 0.7011 | -4.4078  |
| LargeArteryStroke | log_g_Pectobacterium    | Inverse variance weighted | 18 | -0.0563 | 0.1019 | 0.5806 | -0.0167 | 0.0761 | 0.8293 | 12.6084 | 0.7011 | -4.4078  |
| LargeArteryStroke | log_g_Pectobacterium    | Simple mode               | 18 | 0.0294  | 0.2357 | 0.9021 | -0.0167 | 0.0761 | 0.8293 | 12.6084 | 0.7011 | -4.4078  |
| LargeArteryStroke | log_g_Pectobacterium    | Weighted mode             | 18 | -0.0017 | 0.2349 | 0.9943 | -0.0167 | 0.0761 | 0.8293 | 12.6084 | 0.7011 | -4.4078  |
| LargeArteryStroke | log_g_Pseudoramibacter  | MR Egger                  | 18 | 0.3796  | 0.3147 | 0.2453 | -0.0618 | 0.0771 | 0.4348 | 13.9074 | 0.6056 | -1.8603  |
| LargeArteryStroke | log_g_Pseudoramibacter  | Weighted median           | 18 | 0.2053  | 0.1476 | 0.1642 | -0.0618 | 0.0771 | 0.4348 | 13.9074 | 0.6056 | -1.8603  |
| LargeArteryStroke | log_g_Pseudoramibacter  | Inverse variance weighted | 18 | 0.1413  | 0.1031 | 0.1703 | -0.0618 | 0.0771 | 0.4348 | 13.9074 | 0.6056 | -1.8603  |
| LargeArteryStroke | log_g_Pseudoramibacter  | Simple mode               | 18 | 0.2275  | 0.2481 | 0.3719 | -0.0618 | 0.0771 | 0.4348 | 13.9074 | 0.6056 | -1.8603  |
| LargeArteryStroke | log_g_Pseudoramibacter  | Weighted mode             | 18 | 0.2064  | 0.2557 | 0.4307 | -0.0618 | 0.0771 | 0.4348 | 13.9074 | 0.6056 | -1.8603  |
| LargeArteryStroke | log_g_Rahnella          | MR Egger                  | 18 | 0.7154  | 0.3317 | 0.0466 | -0.1657 | 0.0813 | 0.0583 | 22.9897 | 0.1496 | -9.0476  |
| LargeArteryStroke | log_g_Rahnella          | Weighted median           | 18 | -0.0115 | 0.1497 | 0.9386 | -0.1657 | 0.0813 | 0.0583 | 22.9897 | 0.1496 | -9.0476  |
| LargeArteryStroke | log_g_Rahnella          | Inverse variance weighted | 18 | 0.0765  | 0.1184 | 0.5183 | -0.1657 | 0.0813 | 0.0583 | 22.9897 | 0.1496 | -9.0476  |
| LargeArteryStroke | log_g_Rahnella          | Simple mode               | 18 | -0.2176 | 0.2934 | 0.4684 | -0.1657 | 0.0813 | 0.0583 | 22.9897 | 0.1496 | -9.0476  |
| LargeArteryStroke | log_g_Rahnella          | Weighted mode             | 18 | -0.1549 | 0.3044 | 0.6174 | -0.1657 | 0.0813 | 0.0583 | 22.9897 | 0.1496 | -9.0476  |
| LargeArteryStroke | log_g_Selenomonas       | MR Egger                  | 18 | -0.3546 | 0.3106 | 0.2704 | 0.0739  | 0.0761 | 0.3460 | 14.2526 | 0.6492 | -0.2498  |
| LargeArteryStroke | log_g_Selenomonas       | Weighted median           | 18 | -0.0583 | 0.1344 | 0.6643 | 0.0739  | 0.0761 | 0.3460 | 14.2526 | 0.6492 | -0.2498  |
| LargeArteryStroke | log_g_Selenomonas       | Inverse variance weighted | 18 | -0.0696 | 0.1017 | 0.4934 | 0.0739  | 0.0761 | 0.3460 | 14.2526 | 0.6492 | -0.2498  |
| LargeArteryStroke | log_g_Selenomonas       | Simple mode               | 18 | 0.0548  | 0.2290 | 0.8138 | 0.0739  | 0.0761 | 0.3460 | 14.2526 | 0.6492 | -0.2498  |
| LargeArteryStroke | log_g_Selenomonas       | Weighted mode             | 18 | 0.0548  | 0.2180 | 0.8046 | 0.0739  | 0.0761 | 0.3460 | 14.2526 | 0.6492 | -0.2498  |
| LargeArteryStroke | log_g_Serratia          | MR Egger                  | 18 | 0.1592  | 0.3990 | 0.6952 | -0.0348 | 0.0977 | 0.7267 | 26.3492 | 0.0493 | -0.7163  |
| LargeArteryStroke | log_g_Serratia          | Weighted median           | 18 | 0.1682  | 0.1468 | 0.2517 | -0.0348 | 0.0977 | 0.7267 | 26.3492 | 0.0493 | -0.7163  |
| LargeArteryStroke | log_g_Serratia          | Inverse variance weighted | 18 | 0.0251  | 0.1275 | 0.8441 | -0.0348 | 0.0977 | 0.7267 | 26.3492 | 0.0493 | -0.7163  |
| LargeArteryStroke | log_g_Serratia          | Simple mode               | 18 | 0.2390  | 0.2260 | 0.3052 | -0.0348 | 0.0977 | 0.7267 | 26.3492 | 0.0493 | -0.7163  |
| LargeArteryStroke | log_g_Serratia          | Weighted mode             | 18 | 0.2500  | 0.2033 | 0.2356 | -0.0348 | 0.0977 | 0.7267 | 26.3492 | 0.0493 | -0.7163  |
| LargeArteryStroke | log_g_Shewanella        | MR Egger                  | 18 | 0.3483  | 0.3982 | 0.3947 | -0.0676 | 0.0975 | 0.4981 | 25.9430 | 0.0548 | -0.3000  |
| LargeArteryStroke | log_g_Shewanella        | Weighted median           | 18 | 0.1582  | 0.1413 | 0.2628 | -0.0676 | 0.0975 | 0.4981 | 25.9430 | 0.0548 | -0.3000  |

|                   |                             |                           |    |         |        |        |         |        |        |         |        |          |
|-------------------|-----------------------------|---------------------------|----|---------|--------|--------|---------|--------|--------|---------|--------|----------|
| LargeArteryStroke | log_g_Shewanella            | Inverse variance weighted | 18 | 0.0875  | 0.1285 | 0.4960 | -0.0676 | 0.0975 | 0.4981 | 25.9430 | 0.0548 | -0.3000  |
| LargeArteryStroke | log_g_Shewanella            | Simple mode               | 18 | 0.1963  | 0.2349 | 0.4149 | -0.0676 | 0.0975 | 0.4981 | 25.9430 | 0.0548 | -0.3000  |
| LargeArteryStroke | log_g_Shewanella            | Weighted mode             | 18 | 0.1963  | 0.2249 | 0.3949 | -0.0676 | 0.0975 | 0.4981 | 25.9430 | 0.0548 | -0.3000  |
| LargeArteryStroke | log_g_Slackia               | MR Egger                  | 18 | 0.4191  | 0.3149 | 0.2018 | -0.0868 | 0.0771 | 0.2768 | 13.6407 | 0.6924 | -9.6145  |
| LargeArteryStroke | log_g_Slackia               | Weighted median           | 18 | 0.0626  | 0.1455 | 0.6671 | -0.0868 | 0.0771 | 0.2768 | 13.6407 | 0.6924 | -9.6145  |
| LargeArteryStroke | log_g_Slackia               | Inverse variance weighted | 18 | 0.0841  | 0.1029 | 0.4139 | -0.0868 | 0.0771 | 0.2768 | 13.6407 | 0.6924 | -9.6145  |
| LargeArteryStroke | log_g_Slackia               | Simple mode               | 18 | -0.1806 | 0.2611 | 0.4984 | -0.0868 | 0.0771 | 0.2768 | 13.6407 | 0.6924 | -9.6145  |
| LargeArteryStroke | log_g_Slackia               | Weighted mode             | 18 | 0.1162  | 0.2465 | 0.6433 | -0.0868 | 0.0771 | 0.2768 | 13.6407 | 0.6924 | -9.6145  |
| LargeArteryStroke | log_g_Sodalis               | MR Egger                  | 18 | 0.2402  | 0.3117 | 0.4522 | -0.0393 | 0.0764 | 0.6140 | 7.5875  | 0.9602 | -18.6512 |
| LargeArteryStroke | log_g_Sodalis               | Weighted median           | 18 | 0.0542  | 0.1332 | 0.6840 | -0.0393 | 0.0764 | 0.6140 | 7.5875  | 0.9602 | -18.6512 |
| LargeArteryStroke | log_g_Sodalis               | Inverse variance weighted | 18 | 0.0887  | 0.1022 | 0.3855 | -0.0393 | 0.0764 | 0.6140 | 7.5875  | 0.9602 | -18.6512 |
| LargeArteryStroke | log_g_Sodalis               | Simple mode               | 18 | -0.0133 | 0.2329 | 0.9550 | -0.0393 | 0.0764 | 0.6140 | 7.5875  | 0.9602 | -18.6512 |
| LargeArteryStroke | log_g_Sodalis               | Weighted mode             | 18 | 0.0098  | 0.2166 | 0.9645 | -0.0393 | 0.0764 | 0.6140 | 7.5875  | 0.9602 | -18.6512 |
| LargeArteryStroke | log_g_Thauera               | MR Egger                  | 18 | 0.4692  | 0.3094 | 0.1489 | -0.1122 | 0.0759 | 0.1584 | 10.6626 | 0.8736 | -28.5377 |
| LargeArteryStroke | log_g_Thauera               | Weighted median           | 18 | 0.0820  | 0.1402 | 0.5586 | -0.1122 | 0.0759 | 0.1584 | 10.6626 | 0.8736 | -28.5377 |
| LargeArteryStroke | log_g_Thauera               | Inverse variance weighted | 18 | 0.0368  | 0.1016 | 0.7169 | -0.1122 | 0.0759 | 0.1584 | 10.6626 | 0.8736 | -28.5377 |
| LargeArteryStroke | log_g_Thauera               | Simple mode               | 18 | 0.0958  | 0.2341 | 0.6876 | -0.1122 | 0.0759 | 0.1584 | 10.6626 | 0.8736 | -28.5377 |
| LargeArteryStroke | log_g_Thauera               | Weighted mode             | 18 | 0.1051  | 0.2202 | 0.6391 | -0.1122 | 0.0759 | 0.1584 | 10.6626 | 0.8736 | -28.5377 |
| LargeArteryStroke | log_g_Thermoanaerobacter    | MR Egger                  | 18 | -0.3361 | 0.3164 | 0.3039 | 0.1006  | 0.0776 | 0.2131 | 17.1389 | 0.4450 | -6.8111  |
| LargeArteryStroke | log_g_Thermoanaerobacter    | Weighted median           | 18 | -0.0149 | 0.1472 | 0.9194 | 0.1006  | 0.0776 | 0.2131 | 17.1389 | 0.4450 | -6.8111  |
| LargeArteryStroke | log_g_Thermoanaerobacter    | Inverse variance weighted | 18 | 0.0514  | 0.1044 | 0.6222 | 0.1006  | 0.0776 | 0.2131 | 17.1389 | 0.4450 | -6.8111  |
| LargeArteryStroke | log_g_Thermoanaerobacter    | Simple mode               | 18 | -0.0729 | 0.2479 | 0.7723 | 0.1006  | 0.0776 | 0.2131 | 17.1389 | 0.4450 | -6.8111  |
| LargeArteryStroke | log_g_Thermoanaerobacter    | Weighted mode             | 18 | -0.0453 | 0.2235 | 0.8419 | 0.1006  | 0.0776 | 0.2131 | 17.1389 | 0.4450 | -6.8111  |
| LargeArteryStroke | log_g_Thermoanaerobacterium | MR Egger                  | 18 | -0.2907 | 0.3197 | 0.3767 | 0.0941  | 0.0784 | 0.2474 | 17.9542 | 0.3917 | -19.0802 |
| LargeArteryStroke | log_g_Thermoanaerobacterium | Weighted median           | 18 | 0.1782  | 0.1404 | 0.2043 | 0.0941  | 0.0784 | 0.2474 | 17.9542 | 0.3917 | -19.0802 |
| LargeArteryStroke | log_g_Thermoanaerobacterium | Inverse variance weighted | 18 | 0.0718  | 0.1064 | 0.4996 | 0.0941  | 0.0784 | 0.2474 | 17.9542 | 0.3917 | -19.0802 |
| LargeArteryStroke | log_g_Thermoanaerobacterium | Simple mode               | 18 | 0.2143  | 0.2614 | 0.4237 | 0.0941  | 0.0784 | 0.2474 | 17.9542 | 0.3917 | -19.0802 |
| LargeArteryStroke | log_g_Thermoanaerobacterium | Weighted mode             | 18 | 0.2201  | 0.2366 | 0.3652 | 0.0941  | 0.0784 | 0.2474 | 17.9542 | 0.3917 | -19.0802 |
| LargeArteryStroke | log_g_Thermosinus           | MR Egger                  | 18 | -0.4483 | 0.3116 | 0.1694 | 0.1086  | 0.0764 | 0.1742 | 17.4544 | 0.4240 | -1.5580  |
| LargeArteryStroke | log_g_Thermosinus           | Weighted median           | 18 | -0.0963 | 0.1459 | 0.5093 | 0.1086  | 0.0764 | 0.1742 | 17.4544 | 0.4240 | -1.5580  |
| LargeArteryStroke | log_g_Thermosinus           | Inverse variance weighted | 18 | -0.0297 | 0.1035 | 0.7739 | 0.1086  | 0.0764 | 0.1742 | 17.4544 | 0.4240 | -1.5580  |
| LargeArteryStroke | log_g_Thermosinus           | Simple mode               | 18 | -0.1862 | 0.2310 | 0.4313 | 0.1086  | 0.0764 | 0.1742 | 17.4544 | 0.4240 | -1.5580  |
| LargeArteryStroke | log_g_Thermosinus           | Weighted mode             | 18 | -0.1862 | 0.2211 | 0.4112 | 0.1086  | 0.0764 | 0.1742 | 17.4544 | 0.4240 | -1.5580  |
| LargeArteryStroke | log_g_Yersinia              | MR Egger                  | 18 | 0.1549  | 0.3461 | 0.6604 | -0.0317 | 0.0848 | 0.7131 | 19.9682 | 0.2217 | -1.5215  |
| LargeArteryStroke | log_g_Yersinia              | Weighted median           | 18 | -0.1089 | 0.1363 | 0.4240 | -0.0317 | 0.0848 | 0.7131 | 19.9682 | 0.2217 | -1.5215  |
| LargeArteryStroke | log_g_Yersinia              | Inverse variance weighted | 18 | 0.0326  | 0.1106 | 0.7685 | -0.0317 | 0.0848 | 0.7131 | 19.9682 | 0.2217 | -1.5215  |
| LargeArteryStroke | log_g_Yersinia              | Simple mode               | 18 | -0.1321 | 0.2243 | 0.5636 | -0.0317 | 0.0848 | 0.7131 | 19.9682 | 0.2217 | -1.5215  |
| LargeArteryStroke | log_g_Yersinia              | Weighted mode             | 18 | -0.1244 | 0.2163 | 0.5729 | -0.0317 | 0.0848 | 0.7131 | 19.9682 | 0.2217 | -1.5215  |
| LargeArteryStroke | log_o_Aeromonadales         | MR Egger                  | 18 | 0.5701  | 0.3554 | 0.1283 | -0.1660 | 0.0870 | 0.0745 | 25.3870 | 0.0864 | -0.2958  |
| LargeArteryStroke | log_o_Aeromonadales         | Weighted median           | 18 | -0.0475 | 0.1464 | 0.7459 | -0.1660 | 0.0870 | 0.0745 | 25.3870 | 0.0864 | -0.2958  |
| LargeArteryStroke | log_o_Aeromonadales         | Inverse variance weighted | 18 | -0.0708 | 0.1251 | 0.5715 | -0.1660 | 0.0870 | 0.0745 | 25.3870 | 0.0864 | -0.2958  |
| LargeArteryStroke | log_o_Aeromonadales         | Simple mode               | 18 | -0.2288 | 0.2617 | 0.3942 | -0.1660 | 0.0870 | 0.0745 | 25.3870 | 0.0864 | -0.2958  |
| LargeArteryStroke | log_o_Aeromonadales         | Weighted mode             | 18 | -0.1361 | 0.2442 | 0.5846 | -0.1660 | 0.0870 | 0.0745 | 25.3870 | 0.0864 | -0.2958  |
| LargeArteryStroke | log_o_Alteromonadales       | MR Egger                  | 18 | 0.3923  | 0.3631 | 0.2959 | -0.0869 | 0.0890 | 0.3431 | 22.9863 | 0.1497 | -0.7741  |
| LargeArteryStroke | log_o_Alteromonadales       | Weighted median           | 18 | 0.1739  | 0.1452 | 0.2311 | -0.0869 | 0.0890 | 0.3431 | 22.9863 | 0.1497 | -0.7741  |
| LargeArteryStroke | log_o_Alteromonadales       | Inverse variance weighted | 18 | 0.0572  | 0.1190 | 0.6305 | -0.0869 | 0.0890 | 0.3431 | 22.9863 | 0.1497 | -0.7741  |
| LargeArteryStroke | log_o_Alteromonadales       | Simple mode               | 18 | 0.1391  | 0.2502 | 0.5854 | -0.0869 | 0.0890 | 0.3431 | 22.9863 | 0.1497 | -0.7741  |
| LargeArteryStroke | log_o_Alteromonadales       | Weighted mode             | 18 | 0.1504  | 0.2242 | 0.5114 | -0.0869 | 0.0890 | 0.3431 | 22.9863 | 0.1497 | -0.7741  |
| LargeArteryStroke | log_o_Caulobacterales       | MR Egger                  | 18 | -0.2722 | 0.3278 | 0.4186 | 0.0867  | 0.0803 | 0.2959 | 18.3964 | 0.3643 | -5.1316  |
| LargeArteryStroke | log_o_Caulobacterales       | Weighted median           | 18 | 0.0062  | 0.1479 | 0.9667 | 0.0867  | 0.0803 | 0.2959 | 18.3964 | 0.3643 | -5.1316  |
| LargeArteryStroke | log_o_Caulobacterales       | Inverse variance weighted | 18 | 0.0626  | 0.1077 | 0.5612 | 0.0867  | 0.0803 | 0.2959 | 18.3964 | 0.3643 | -5.1316  |
| LargeArteryStroke | log_o_Caulobacterales       | Simple mode               | 18 | -0.1122 | 0.2643 | 0.6765 | 0.0867  | 0.0803 | 0.2959 | 18.3964 | 0.3643 | -5.1316  |
| LargeArteryStroke | log_o_Caulobacterales       | Weighted mode             | 18 | -0.0994 | 0.2432 | 0.6878 | 0.0867  | 0.0803 | 0.2959 | 18.3964 | 0.3643 | -5.1316  |
| LargeArteryStroke | log_o_Chromatiales          | MR Egger                  | 18 | -0.2494 | 0.3104 | 0.4333 | 0.0271  | 0.0761 | 0.7263 | 14.4163 | 0.5677 | -0.4083  |
| LargeArteryStroke | log_o_Chromatiales          | Weighted median           | 18 | -0.0373 | 0.1439 | 0.7955 | 0.0271  | 0.0761 | 0.7263 | 14.4163 | 0.5677 | -0.4083  |
| LargeArteryStroke | log_o_Chromatiales          | Inverse variance weighted | 18 | -0.1450 | 0.1019 | 0.1545 | 0.0271  | 0.0761 | 0.7263 | 14.4163 | 0.5677 | -0.4083  |
| LargeArteryStroke | log_o_Chromatiales          | Simple mode               | 18 | -0.0095 | 0.2382 | 0.9686 | 0.0271  | 0.0761 | 0.7263 | 14.4163 | 0.5677 | -0.4083  |
| LargeArteryStroke | log_o_Chromatiales          | Weighted mode             | 18 | -0.0012 | 0.2339 | 0.9960 | 0.0271  | 0.0761 | 0.7263 | 14.4163 | 0.5677 | -0.4083  |
| LargeArteryStroke | log_o_Rhizobiales           | MR Egger                  | 18 | 0.2552  | 0.3108 | 0.4238 | -0.0223 | 0.0762 | 0.7737 | 15.6856 | 0.4751 | -13.3148 |
| LargeArteryStroke | log_o_Rhizobiales           | Weighted median           | 18 | 0.2488  | 0.1450 | 0.0861 | -0.0223 | 0.0762 | 0.7737 | 15.6856 | 0.4751 | -13.3148 |
| LargeArteryStroke | log_o_Rhizobiales           | Inverse variance weighted | 18 | 0.1693  | 0.1020 | 0.0969 | -0.0223 | 0.0762 | 0.7737 | 15.6856 | 0.4751 | -13.3148 |

|                   |                                   |                           |    |         |        |        |         |        |        |         |        |          |
|-------------------|-----------------------------------|---------------------------|----|---------|--------|--------|---------|--------|--------|---------|--------|----------|
| LargeArteryStroke | log_o_Rhizobiales                 | Simple mode               | 18 | 0.3022  | 0.2492 | 0.2418 | -0.0223 | 0.0762 | 0.7737 | 15.6856 | 0.4751 | -13.3148 |
| LargeArteryStroke | log_o_Rhizobiales                 | Weighted mode             | 18 | 0.2806  | 0.2398 | 0.2582 | -0.0223 | 0.0762 | 0.7737 | 15.6856 | 0.4751 | -13.3148 |
| LargeArteryStroke | log_o_Thermoanaerobacterales      | MR Egger                  | 18 | -0.0931 | 0.4459 | 0.8372 | 0.0232  | 0.1091 | 0.8345 | 31.2623 | 0.0125 | -2.7032  |
| LargeArteryStroke | log_o_Thermoanaerobacterales      | Weighted median           | 18 | -0.1079 | 0.1575 | 0.4935 | 0.0232  | 0.1091 | 0.8345 | 31.2623 | 0.0125 | -2.7032  |
| LargeArteryStroke | log_o_Thermoanaerobacterales      | Inverse variance weighted | 18 | -0.0036 | 0.1413 | 0.9797 | 0.0232  | 0.1091 | 0.8345 | 31.2623 | 0.0125 | -2.7032  |
| LargeArteryStroke | log_o_Thermoanaerobacterales      | Simple mode               | 18 | -0.1359 | 0.2663 | 0.6163 | 0.0232  | 0.1091 | 0.8345 | 31.2623 | 0.0125 | -2.7032  |
| LargeArteryStroke | log_o_Thermoanaerobacterales      | Weighted mode             | 18 | -0.1050 | 0.2951 | 0.7264 | 0.0232  | 0.1091 | 0.8345 | 31.2623 | 0.0125 | -2.7032  |
| LargeArteryStroke | log_p_Chloroflexi                 | MR Egger                  | 18 | -0.2840 | 0.3127 | 0.3773 | 0.1078  | 0.0767 | 0.1793 | 13.0053 | 0.7358 | -30.3999 |
| LargeArteryStroke | log_p_Chloroflexi                 | Weighted median           | 18 | 0.1433  | 0.1412 | 0.3101 | 0.1078  | 0.0767 | 0.1793 | 13.0053 | 0.7358 | -30.3999 |
| LargeArteryStroke | log_p_Chloroflexi                 | Inverse variance weighted | 18 | 0.1308  | 0.1028 | 0.2033 | 0.1078  | 0.0767 | 0.1793 | 13.0053 | 0.7358 | -30.3999 |
| LargeArteryStroke | log_p_Chloroflexi                 | Simple mode               | 18 | 0.1554  | 0.2433 | 0.5316 | 0.1078  | 0.0767 | 0.1793 | 13.0053 | 0.7358 | -30.3999 |
| LargeArteryStroke | log_p_Chloroflexi                 | Weighted mode             | 18 | 0.1554  | 0.2435 | 0.5321 | 0.1078  | 0.0767 | 0.1793 | 13.0053 | 0.7358 | -30.3999 |
| LargeArteryStroke | log_p_Cyanobacteria               | MR Egger                  | 18 | -0.1512 | 0.3117 | 0.6342 | 0.0704  | 0.0764 | 0.3701 | 15.4410 | 0.4926 | -4.4839  |
| LargeArteryStroke | log_p_Cyanobacteria               | Weighted median           | 18 | 0.0907  | 0.1449 | 0.5312 | 0.0704  | 0.0764 | 0.3701 | 15.4410 | 0.4926 | -4.4839  |
| LargeArteryStroke | log_p_Cyanobacteria               | Inverse variance weighted | 18 | 0.1203  | 0.1022 | 0.2392 | 0.0704  | 0.0764 | 0.3701 | 15.4410 | 0.4926 | -4.4839  |
| LargeArteryStroke | log_p_Cyanobacteria               | Simple mode               | 18 | 0.0386  | 0.2501 | 0.8791 | 0.0704  | 0.0764 | 0.3701 | 15.4410 | 0.4926 | -4.4839  |
| LargeArteryStroke | log_p_Cyanobacteria               | Weighted mode             | 18 | 0.0461  | 0.2237 | 0.8393 | 0.0704  | 0.0764 | 0.3701 | 15.4410 | 0.4926 | -4.4839  |
| LargeArteryStroke | log_p_Euryarchaeota               | MR Egger                  | 18 | -0.1176 | 0.3408 | 0.7346 | 0.0247  | 0.0835 | 0.7714 | 18.8381 | 0.2771 | -5.1614  |
| LargeArteryStroke | log_p_Euryarchaeota               | Weighted median           | 18 | 0.0691  | 0.1408 | 0.6237 | 0.0247  | 0.0835 | 0.7714 | 18.8381 | 0.2771 | -5.1614  |
| LargeArteryStroke | log_p_Euryarchaeota               | Inverse variance weighted | 18 | -0.0224 | 0.1087 | 0.8364 | 0.0247  | 0.0835 | 0.7714 | 18.8381 | 0.2771 | -5.1614  |
| LargeArteryStroke | log_p_Euryarchaeota               | Simple mode               | 18 | 0.0587  | 0.2278 | 0.7998 | 0.0247  | 0.0835 | 0.7714 | 18.8381 | 0.2771 | -5.1614  |
| LargeArteryStroke | log_p_Euryarchaeota               | Weighted mode             | 18 | 0.0692  | 0.2232 | 0.7602 | 0.0247  | 0.0835 | 0.7714 | 18.8381 | 0.2771 | -5.1614  |
| LargeArteryStroke | log_p_Fibrobacteres               | MR Egger                  | 18 | -0.2601 | 0.3164 | 0.4232 | 0.0900  | 0.0776 | 0.2629 | 15.1661 | 0.5835 | -3.2120  |
| LargeArteryStroke | log_p_Fibrobacteres               | Weighted median           | 18 | 0.0123  | 0.1398 | 0.9298 | 0.0900  | 0.0776 | 0.2629 | 15.1661 | 0.5835 | -3.2120  |
| LargeArteryStroke | log_p_Fibrobacteres               | Inverse variance weighted | 18 | 0.0867  | 0.1039 | 0.4040 | 0.0900  | 0.0776 | 0.2629 | 15.1661 | 0.5835 | -3.2120  |
| LargeArteryStroke | log_p_Fibrobacteres               | Simple mode               | 18 | -0.0162 | 0.2459 | 0.9482 | 0.0900  | 0.0776 | 0.2629 | 15.1661 | 0.5835 | -3.2120  |
| LargeArteryStroke | log_p_Fibrobacteres               | Weighted mode             | 18 | -0.0456 | 0.2461 | 0.8552 | 0.0900  | 0.0776 | 0.2629 | 15.1661 | 0.5835 | -3.2120  |
| LargeArteryStroke | log_p_Tenericutes                 | MR Egger                  | 18 | -0.4748 | 0.3717 | 0.2198 | 0.1148  | 0.0910 | 0.2252 | 24.6524 | 0.1028 | -0.8644  |
| LargeArteryStroke | log_p_Tenericutes                 | Weighted median           | 18 | 0.0169  | 0.1484 | 0.9094 | 0.1148  | 0.0910 | 0.2252 | 24.6524 | 0.1028 | -0.8644  |
| LargeArteryStroke | log_p_Tenericutes                 | Inverse variance weighted | 18 | -0.0318 | 0.1241 | 0.7977 | 0.1148  | 0.0910 | 0.2252 | 24.6524 | 0.1028 | -0.8644  |
| LargeArteryStroke | log_p_Tenericutes                 | Simple mode               | 18 | 0.0619  | 0.2520 | 0.8091 | 0.1148  | 0.0910 | 0.2252 | 24.6524 | 0.1028 | -0.8644  |
| LargeArteryStroke | log_p_Tenericutes                 | Weighted mode             | 18 | 0.0734  | 0.2523 | 0.7747 | 0.1148  | 0.0910 | 0.2252 | 24.6524 | 0.1028 | -0.8644  |
| LargeArteryStroke | log_s_Abiotrophia_defectiva       | MR Egger                  | 18 | -0.4715 | 0.3094 | 0.1471 | 0.1231  | 0.0758 | 0.1242 | 14.9199 | 0.6013 | -21.5924 |
| LargeArteryStroke | log_s_Abiotrophia_defectiva       | Weighted median           | 18 | -0.0948 | 0.1400 | 0.4982 | 0.1231  | 0.0758 | 0.1242 | 14.9199 | 0.6013 | -21.5924 |
| LargeArteryStroke | log_s_Abiotrophia_defectiva       | Inverse variance weighted | 18 | 0.0029  | 0.1015 | 0.9774 | 0.1231  | 0.0758 | 0.1242 | 14.9199 | 0.6013 | -21.5924 |
| LargeArteryStroke | log_s_Abiotrophia_defectiva       | Simple mode               | 18 | -0.2882 | 0.2799 | 0.3177 | 0.1231  | 0.0758 | 0.1242 | 14.9199 | 0.6013 | -21.5924 |
| LargeArteryStroke | log_s_Abiotrophia_defectiva       | Weighted mode             | 18 | -0.3161 | 0.2625 | 0.2451 | 0.1231  | 0.0758 | 0.1242 | 14.9199 | 0.6013 | -21.5924 |
| LargeArteryStroke | log_s_Achromobacter_piechaudii    | MR Egger                  | 18 | 0.3675  | 0.3106 | 0.2540 | -0.0669 | 0.0761 | 0.3925 | 15.3056 | 0.5024 | -22.3216 |
| LargeArteryStroke | log_s_Achromobacter_piechaudii    | Weighted median           | 18 | 0.0747  | 0.1464 | 0.6099 | -0.0669 | 0.0761 | 0.3925 | 15.3056 | 0.5024 | -22.3216 |
| LargeArteryStroke | log_s_Achromobacter_piechaudii    | Inverse variance weighted | 18 | 0.1096  | 0.1020 | 0.2824 | -0.0669 | 0.0761 | 0.3925 | 15.3056 | 0.5024 | -22.3216 |
| LargeArteryStroke | log_s_Achromobacter_piechaudii    | Simple mode               | 18 | -0.0317 | 0.2696 | 0.9078 | -0.0669 | 0.0761 | 0.3925 | 15.3056 | 0.5024 | -22.3216 |
| LargeArteryStroke | log_s_Achromobacter_piechaudii    | Weighted mode             | 18 | 0.0198  | 0.2473 | 0.9371 | -0.0669 | 0.0761 | 0.3925 | 15.3056 | 0.5024 | -22.3216 |
| LargeArteryStroke | log_s_Acidaminococcus_intestini   | MR Egger                  | 18 | -0.0049 | 0.3405 | 0.9888 | -0.0004 | 0.0834 | 0.9960 | 19.0365 | 0.2668 | -6.7308  |
| LargeArteryStroke | log_s_Acidaminococcus_intestini   | Weighted median           | 18 | -0.0305 | 0.1399 | 0.8273 | -0.0004 | 0.0834 | 0.9960 | 19.0365 | 0.2668 | -6.7308  |
| LargeArteryStroke | log_s_Acidaminococcus_intestini   | Inverse variance weighted | 18 | -0.0065 | 0.1082 | 0.9522 | -0.0004 | 0.0834 | 0.9960 | 19.0365 | 0.2668 | -6.7308  |
| LargeArteryStroke | log_s_Acidaminococcus_intestini   | Simple mode               | 18 | -0.0184 | 0.2294 | 0.9372 | -0.0004 | 0.0834 | 0.9960 | 19.0365 | 0.2668 | -6.7308  |
| LargeArteryStroke | log_s_Acidaminococcus_intestini   | Weighted mode             | 18 | 0.0026  | 0.2118 | 0.9903 | -0.0004 | 0.0834 | 0.9960 | 19.0365 | 0.2668 | -6.7308  |
| LargeArteryStroke | log_s_Acinetobacter_baumannii     | MR Egger                  | 18 | 0.3547  | 0.3965 | 0.3842 | -0.0874 | 0.0972 | 0.3816 | 27.1846 | 0.0554 | -0.3058  |
| LargeArteryStroke | log_s_Acinetobacter_baumannii     | Weighted median           | 18 | 0.0042  | 0.1540 | 0.9780 | -0.0874 | 0.0972 | 0.3816 | 27.1846 | 0.0554 | -0.3058  |
| LargeArteryStroke | log_s_Acinetobacter_baumannii     | Inverse variance weighted | 18 | 0.0177  | 0.1295 | 0.8910 | -0.0874 | 0.0972 | 0.3816 | 27.1846 | 0.0554 | -0.3058  |
| LargeArteryStroke | log_s_Acinetobacter_baumannii     | Simple mode               | 18 | -0.0249 | 0.2607 | 0.9249 | -0.0874 | 0.0972 | 0.3816 | 27.1846 | 0.0554 | -0.3058  |
| LargeArteryStroke | log_s_Acinetobacter_baumannii     | Weighted mode             | 18 | -0.0346 | 0.2366 | 0.8854 | -0.0874 | 0.0972 | 0.3816 | 27.1846 | 0.0554 | -0.3058  |
| LargeArteryStroke | log_s_Acinetobacter_haemolyticus  | MR Egger                  | 18 | 0.5234  | 0.3910 | 0.1994 | -0.1199 | 0.0957 | 0.2283 | 27.6587 | 0.0491 | -0.8139  |
| LargeArteryStroke | log_s_Acinetobacter_haemolyticus  | Weighted median           | 18 | 0.0549  | 0.1459 | 0.7067 | -0.1199 | 0.0957 | 0.2283 | 27.6587 | 0.0491 | -0.8139  |
| LargeArteryStroke | log_s_Acinetobacter_haemolyticus  | Inverse variance weighted | 18 | 0.0606  | 0.1303 | 0.6420 | -0.1199 | 0.0957 | 0.2283 | 27.6587 | 0.0491 | -0.8139  |
| LargeArteryStroke | log_s_Acinetobacter_haemolyticus  | Simple mode               | 18 | 0.0981  | 0.2392 | 0.6870 | -0.1199 | 0.0957 | 0.2283 | 27.6587 | 0.0491 | -0.8139  |
| LargeArteryStroke | log_s_Acinetobacter_haemolyticus  | Weighted mode             | 18 | 0.0981  | 0.2240 | 0.6670 | -0.1199 | 0.0957 | 0.2283 | 27.6587 | 0.0491 | -0.8139  |
| LargeArteryStroke | log_s_Aggregatibacter_aphrophilus | MR Egger                  | 18 | -0.0273 | 0.3445 | 0.9378 | 0.0128  | 0.0843 | 0.8810 | 18.9968 | 0.2688 | -0.4427  |
| LargeArteryStroke | log_s_Aggregatibacter_aphrophilus | Weighted median           | 18 | 0.1070  | 0.1430 | 0.4543 | 0.0128  | 0.0843 | 0.8810 | 18.9968 | 0.2688 | -0.4427  |
| LargeArteryStroke | log_s_Aggregatibacter_aphrophilus | Inverse variance weighted | 18 | 0.0222  | 0.1094 | 0.8389 | 0.0128  | 0.0843 | 0.8810 | 18.9968 | 0.2688 | -0.4427  |
| LargeArteryStroke | log_s_Aggregatibacter_aphrophilus | Simple mode               | 18 | 0.1583  | 0.2314 | 0.5032 | 0.0128  | 0.0843 | 0.8810 | 18.9968 | 0.2688 | -0.4427  |

|                   |                                   |                           |    |         |        |        |         |        |        |         |        |          |
|-------------------|-----------------------------------|---------------------------|----|---------|--------|--------|---------|--------|--------|---------|--------|----------|
| LargeArteryStroke | log_s_Aggregatibacter_aphrophilus | Weighted mode             | 18 | 0.1583  | 0.2152 | 0.4722 | 0.0128  | 0.0843 | 0.8810 | 18.9968 | 0.2688 | -0.4427  |
| LargeArteryStroke | log_s_Bifidobacterium_angulatum   | MR Egger                  | 18 | 0.0164  | 0.3185 | 0.9595 | 0.0134  | 0.0781 | 0.8658 | 8.9392  | 0.9159 | -38.8959 |
| LargeArteryStroke | log_s_Bifidobacterium_angulatum   | Weighted median           | 18 | 0.0116  | 0.1389 | 0.9335 | 0.0134  | 0.0781 | 0.8658 | 8.9392  | 0.9159 | -38.8959 |
| LargeArteryStroke | log_s_Bifidobacterium_angulatum   | Inverse variance weighted | 18 | 0.0681  | 0.1050 | 0.5167 | 0.0134  | 0.0781 | 0.8658 | 8.9392  | 0.9159 | -38.8959 |
| LargeArteryStroke | log_s_Bifidobacterium_angulatum   | Simple mode               | 18 | -0.0408 | 0.2310 | 0.8618 | 0.0134  | 0.0781 | 0.8658 | 8.9392  | 0.9159 | -38.8959 |
| LargeArteryStroke | log_s_Bifidobacterium_angulatum   | Weighted mode             | 18 | -0.0517 | 0.2114 | 0.8098 | 0.0134  | 0.0781 | 0.8658 | 8.9392  | 0.9159 | -38.8959 |
| LargeArteryStroke | log_s_Bifidobacterium_dentium     | MR Egger                  | 18 | 0.2047  | 0.3166 | 0.5271 | -0.0616 | 0.0777 | 0.4394 | 13.4676 | 0.6383 | -13.6331 |
| LargeArteryStroke | log_s_Bifidobacterium_dentium     | Weighted median           | 18 | -0.0287 | 0.1491 | 0.8471 | -0.0616 | 0.0777 | 0.4394 | 13.4676 | 0.6383 | -13.6331 |
| LargeArteryStroke | log_s_Bifidobacterium_dentium     | Inverse variance weighted | 18 | -0.0324 | 0.1042 | 0.7562 | -0.0616 | 0.0777 | 0.4394 | 13.4676 | 0.6383 | -13.6331 |
| LargeArteryStroke | log_s_Bifidobacterium_dentium     | Simple mode               | 18 | -0.0160 | 0.2385 | 0.9474 | -0.0616 | 0.0777 | 0.4394 | 13.4676 | 0.6383 | -13.6331 |
| LargeArteryStroke | log_s_Bifidobacterium_dentium     | Weighted mode             | 18 | -0.0160 | 0.2266 | 0.9447 | -0.0616 | 0.0777 | 0.4394 | 13.4676 | 0.6383 | -13.6331 |
| LargeArteryStroke | log_s_Brucella_melitensis         | MR Egger                  | 18 | 0.5393  | 0.3113 | 0.1024 | -0.1326 | 0.0763 | 0.1015 | 19.0096 | 0.3280 | -2.1690  |
| LargeArteryStroke | log_s_Brucella_melitensis         | Weighted median           | 18 | -0.0018 | 0.1461 | 0.9901 | -0.1326 | 0.0763 | 0.1015 | 19.0096 | 0.3280 | -2.1690  |
| LargeArteryStroke | log_s_Brucella_melitensis         | Inverse variance weighted | 18 | 0.0284  | 0.1080 | 0.7927 | -0.1326 | 0.0763 | 0.1015 | 19.0096 | 0.3280 | -2.1690  |
| LargeArteryStroke | log_s_Brucella_melitensis         | Simple mode               | 18 | -0.1511 | 0.2546 | 0.5608 | -0.1326 | 0.0763 | 0.1015 | 19.0096 | 0.3280 | -2.1690  |
| LargeArteryStroke | log_s_Brucella_melitensis         | Weighted mode             | 18 | -0.1268 | 0.2468 | 0.6140 | -0.1326 | 0.0763 | 0.1015 | 19.0096 | 0.3280 | -2.1690  |
| LargeArteryStroke | log_s_Burkholderia_multivorans    | MR Egger                  | 18 | 0.0660  | 0.3599 | 0.8567 | 0.0052  | 0.0881 | 0.9537 | 21.4055 | 0.1634 | -1.9473  |
| LargeArteryStroke | log_s_Burkholderia_multivorans    | Weighted median           | 18 | -0.0606 | 0.1521 | 0.6906 | 0.0052  | 0.0881 | 0.9537 | 21.4055 | 0.1634 | -1.9473  |
| LargeArteryStroke | log_s_Burkholderia_multivorans    | Inverse variance weighted | 18 | 0.0861  | 0.1145 | 0.4518 | 0.0052  | 0.0881 | 0.9537 | 21.4055 | 0.1634 | -1.9473  |
| LargeArteryStroke | log_s_Burkholderia_multivorans    | Simple mode               | 18 | -0.1490 | 0.2650 | 0.5813 | 0.0052  | 0.0881 | 0.9537 | 21.4055 | 0.1634 | -1.9473  |
| LargeArteryStroke | log_s_Burkholderia_multivorans    | Weighted mode             | 18 | -0.1402 | 0.2533 | 0.5873 | 0.0052  | 0.0881 | 0.9537 | 21.4055 | 0.1634 | -1.9473  |
| LargeArteryStroke | log_s_Campylobacter_conciscus     | MR Egger                  | 18 | -0.3033 | 0.3121 | 0.3456 | 0.0379  | 0.0765 | 0.6272 | 12.6778 | 0.6962 | -14.2077 |
| LargeArteryStroke | log_s_Campylobacter_conciscus     | Weighted median           | 18 | -0.2037 | 0.1393 | 0.1438 | 0.0379  | 0.0765 | 0.6272 | 12.6778 | 0.6962 | -14.2077 |
| LargeArteryStroke | log_s_Campylobacter_conciscus     | Inverse variance weighted | 18 | -0.1573 | 0.1024 | 0.1244 | 0.0379  | 0.0765 | 0.6272 | 12.6778 | 0.6962 | -14.2077 |
| LargeArteryStroke | log_s_Campylobacter_conciscus     | Simple mode               | 18 | -0.2754 | 0.2519 | 0.2896 | 0.0379  | 0.0765 | 0.6272 | 12.6778 | 0.6962 | -14.2077 |
| LargeArteryStroke | log_s_Campylobacter_conciscus     | Weighted mode             | 18 | -0.2185 | 0.2606 | 0.4135 | 0.0379  | 0.0765 | 0.6272 | 12.6778 | 0.6962 | -14.2077 |
| LargeArteryStroke | log_s_Citrobacter_rodentium       | MR Egger                  | 18 | 0.4524  | 0.3955 | 0.2695 | -0.1215 | 0.0969 | 0.2279 | 28.3490 | 0.0410 | -0.3139  |
| LargeArteryStroke | log_s_Citrobacter_rodentium       | Weighted median           | 18 | -0.1098 | 0.1428 | 0.4420 | -0.1215 | 0.0969 | 0.2279 | 28.3490 | 0.0410 | -0.3139  |
| LargeArteryStroke | log_s_Citrobacter_rodentium       | Inverse variance weighted | 18 | -0.0162 | 0.1319 | 0.9025 | -0.1215 | 0.0969 | 0.2279 | 28.3490 | 0.0410 | -0.3139  |
| LargeArteryStroke | log_s_Citrobacter_rodentium       | Simple mode               | 18 | -0.1643 | 0.2269 | 0.4789 | -0.1215 | 0.0969 | 0.2279 | 28.3490 | 0.0410 | -0.3139  |
| LargeArteryStroke | log_s_Citrobacter_rodentium       | Weighted mode             | 18 | -0.1346 | 0.2216 | 0.5515 | -0.1215 | 0.0969 | 0.2279 | 28.3490 | 0.0410 | -0.3139  |
| LargeArteryStroke | log_s_Clostridium_butyricum       | MR Egger                  | 18 | -0.3560 | 0.3106 | 0.2686 | 0.0520  | 0.0761 | 0.5044 | 13.1820 | 0.6594 | -20.2133 |
| LargeArteryStroke | log_s_Clostridium_butyricum       | Weighted median           | 18 | -0.1502 | 0.1403 | 0.2844 | 0.0520  | 0.0761 | 0.5044 | 13.1820 | 0.6594 | -20.2133 |
| LargeArteryStroke | log_s_Clostridium_butyricum       | Inverse variance weighted | 18 | -0.1556 | 0.1019 | 0.1266 | 0.0520  | 0.0761 | 0.5044 | 13.1820 | 0.6594 | -20.2133 |
| LargeArteryStroke | log_s_Clostridium_butyricum       | Simple mode               | 18 | -0.1859 | 0.2523 | 0.4713 | 0.0520  | 0.0761 | 0.5044 | 13.1820 | 0.6594 | -20.2133 |
| LargeArteryStroke | log_s_Clostridium_butyricum       | Weighted mode             | 18 | -0.1666 | 0.2151 | 0.4492 | 0.0520  | 0.0761 | 0.5044 | 13.1820 | 0.6594 | -20.2133 |
| LargeArteryStroke | log_s_Clostridium_hiranonis       | MR Egger                  | 18 | -0.0655 | 0.3122 | 0.8364 | -0.0672 | 0.0765 | 0.3929 | 12.8211 | 0.6858 | NA       |
| LargeArteryStroke | log_s_Clostridium_hiranonis       | Weighted median           | 18 | -0.3998 | 0.1404 | 0.0044 | -0.0672 | 0.0765 | 0.3929 | 12.8211 | 0.6858 | NA       |
| LargeArteryStroke | log_s_Clostridium_hiranonis       | Inverse variance weighted | 18 | -0.3244 | 0.1026 | 0.0016 | -0.0672 | 0.0765 | 0.3929 | 12.8211 | 0.6858 | NA       |
| LargeArteryStroke | log_s_Clostridium_hiranonis       | Simple mode               | 18 | -0.5608 | 0.2608 | 0.0462 | -0.0672 | 0.0765 | 0.3929 | 12.8211 | 0.6858 | NA       |
| LargeArteryStroke | log_s_Clostridium_hiranonis       | Weighted mode             | 18 | -0.5300 | 0.2719 | 0.0680 | -0.0672 | 0.0765 | 0.3929 | 12.8211 | 0.6858 | NA       |
| LargeArteryStroke | log_s_Clostridium_hylemonae       | MR Egger                  | 18 | -0.3930 | 0.3218 | 0.2397 | 0.1033  | 0.0789 | 0.2087 | 18.7549 | 0.3428 | -13.2242 |
| LargeArteryStroke | log_s_Clostridium_hylemonae       | Weighted median           | 18 | -0.1899 | 0.1446 | 0.1891 | 0.1033  | 0.0789 | 0.2087 | 18.7549 | 0.3428 | -13.2242 |
| LargeArteryStroke | log_s_Clostridium_hylemonae       | Inverse variance weighted | 18 | 0.0052  | 0.1078 | 0.9614 | 0.1033  | 0.0789 | 0.2087 | 18.7549 | 0.3428 | -13.2242 |
| LargeArteryStroke | log_s_Clostridium_hylemonae       | Simple mode               | 18 | -0.2917 | 0.2500 | 0.2594 | 0.1033  | 0.0789 | 0.2087 | 18.7549 | 0.3428 | -13.2242 |
| LargeArteryStroke | log_s_Clostridium_hylemonae       | Weighted mode             | 18 | -0.2781 | 0.2239 | 0.2312 | 0.1033  | 0.0789 | 0.2087 | 18.7549 | 0.3428 | -13.2242 |
| LargeArteryStroke | log_s_Clostridium_kluyveri        | MR Egger                  | 18 | 0.0397  | 0.3494 | 0.9109 | -0.0381 | 0.0855 | 0.6621 | 20.1577 | 0.2132 | -3.3283  |
| LargeArteryStroke | log_s_Clostridium_kluyveri        | Weighted median           | 18 | -0.1189 | 0.1520 | 0.4343 | -0.0381 | 0.0855 | 0.6621 | 20.1577 | 0.2132 | -3.3283  |
| LargeArteryStroke | log_s_Clostridium_kluyveri        | Inverse variance weighted | 18 | -0.1073 | 0.1117 | 0.3368 | -0.0381 | 0.0855 | 0.6621 | 20.1577 | 0.2132 | -3.3283  |
| LargeArteryStroke | log_s_Clostridium_kluyveri        | Simple mode               | 18 | -0.1418 | 0.2518 | 0.5807 | -0.0381 | 0.0855 | 0.6621 | 20.1577 | 0.2132 | -3.3283  |
| LargeArteryStroke | log_s_Clostridium_kluyveri        | Weighted mode             | 18 | -0.1290 | 0.2629 | 0.6299 | -0.0381 | 0.0855 | 0.6621 | 20.1577 | 0.2132 | -3.3283  |
| LargeArteryStroke | log_s_Clostridium_phytofermentans | MR Egger                  | 18 | -0.0933 | 0.3125 | 0.7691 | -0.0039 | 0.0766 | 0.9598 | 7.5083  | 0.9622 | -34.7116 |
| LargeArteryStroke | log_s_Clostridium_phytofermentans | Weighted median           | 18 | -0.1307 | 0.1312 | 0.3190 | -0.0039 | 0.0766 | 0.9598 | 7.5083  | 0.9622 | -34.7116 |
| LargeArteryStroke | log_s_Clostridium_phytofermentans | Inverse variance weighted | 18 | -0.1085 | 0.1025 | 0.2902 | -0.0039 | 0.0766 | 0.9598 | 7.5083  | 0.9622 | -34.7116 |
| LargeArteryStroke | log_s_Clostridium_phytofermentans | Simple mode               | 18 | -0.0148 | 0.2077 | 0.9439 | -0.0039 | 0.0766 | 0.9598 | 7.5083  | 0.9622 | -34.7116 |
| LargeArteryStroke | log_s_Clostridium_phytofermentans | Weighted mode             | 18 | -0.1045 | 0.2177 | 0.6375 | -0.0039 | 0.0766 | 0.9598 | 7.5083  | 0.9622 | -34.7116 |
| LargeArteryStroke | log_s_Collinsella_stercoris       | MR Egger                  | 18 | -0.1258 | 0.3183 | 0.6980 | 0.0205  | 0.0780 | 0.7961 | 16.6307 | 0.4099 | -20.0523 |
| LargeArteryStroke | log_s_Collinsella_stercoris       | Weighted median           | 18 | -0.0892 | 0.1431 | 0.5329 | 0.0205  | 0.0780 | 0.7961 | 16.6307 | 0.4099 | -20.0523 |
| LargeArteryStroke | log_s_Collinsella_stercoris       | Inverse variance weighted | 18 | -0.0467 | 0.1024 | 0.6483 | 0.0205  | 0.0780 | 0.7961 | 16.6307 | 0.4099 | -20.0523 |
| LargeArteryStroke | log_s_Collinsella_stercoris       | Simple mode               | 18 | -0.1071 | 0.2592 | 0.6845 | 0.0205  | 0.0780 | 0.7961 | 16.6307 | 0.4099 | -20.0523 |
| LargeArteryStroke | log_s_Collinsella_stercoris       | Weighted mode             | 18 | -0.1459 | 0.2443 | 0.5582 | 0.0205  | 0.0780 | 0.7961 | 16.6307 | 0.4099 | -20.0523 |

|                   |                                        |                           |    |         |        |        |         |        |        |         |        |          |
|-------------------|----------------------------------------|---------------------------|----|---------|--------|--------|---------|--------|--------|---------|--------|----------|
| LargeArteryStroke | log_s_Comamonas_testosteroni           | MR Egger                  | 18 | 0.2796  | 0.3773 | 0.4693 | -0.0629 | 0.0925 | 0.5059 | 23.5957 | 0.0987 | -6.5615  |
| LargeArteryStroke | log_s_Comamonas_testosteroni           | Weighted median           | 18 | 0.0435  | 0.1542 | 0.7778 | -0.0629 | 0.0925 | 0.5059 | 23.5957 | 0.0987 | -6.5615  |
| LargeArteryStroke | log_s_Comamonas_testosteroni           | Inverse variance weighted | 18 | 0.0371  | 0.1219 | 0.7608 | -0.0629 | 0.0925 | 0.5059 | 23.5957 | 0.0987 | -6.5615  |
| LargeArteryStroke | log_s_Comamonas_testosteroni           | Simple mode               | 18 | -0.0848 | 0.2714 | 0.7585 | -0.0629 | 0.0925 | 0.5059 | 23.5957 | 0.0987 | -6.5615  |
| LargeArteryStroke | log_s_Comamonas_testosteroni           | Weighted mode             | 18 | -0.0778 | 0.2515 | 0.7608 | -0.0629 | 0.0925 | 0.5059 | 23.5957 | 0.0987 | -6.5615  |
| LargeArteryStroke | log_s_Corynebacterium_glucuronolyticum | MR Egger                  | 18 | 0.8673  | 0.3132 | 0.0137 | -0.2314 | 0.0767 | 0.0082 | 18.4340 | 0.3620 | -5.0114  |
| LargeArteryStroke | log_s_Corynebacterium_glucuronolyticum | Weighted median           | 18 | -0.0819 | 0.1455 | 0.5733 | -0.2314 | 0.0767 | 0.0082 | 18.4340 | 0.3620 | -5.0114  |
| LargeArteryStroke | log_s_Corynebacterium_glucuronolyticum | Inverse variance weighted | 18 | -0.0250 | 0.1069 | 0.8154 | -0.2314 | 0.0767 | 0.0082 | 18.4340 | 0.3620 | -5.0114  |
| LargeArteryStroke | log_s_Corynebacterium_glucuronolyticum | Simple mode               | 18 | -0.2244 | 0.2357 | 0.3544 | -0.2314 | 0.0767 | 0.0082 | 18.4340 | 0.3620 | -5.0114  |
| LargeArteryStroke | log_s_Corynebacterium_glucuronolyticum | Weighted mode             | 18 | -0.1154 | 0.2347 | 0.6293 | -0.2314 | 0.0767 | 0.0082 | 18.4340 | 0.3620 | -5.0114  |
| LargeArteryStroke | log_s_Desulfovibrio_alaskensis         | MR Egger                  | 18 | -0.3294 | 0.3122 | 0.3070 | 0.0807  | 0.0764 | 0.3067 | 14.6497 | 0.6207 | -3.1622  |
| LargeArteryStroke | log_s_Desulfovibrio_alaskensis         | Weighted median           | 18 | 0.0513  | 0.1427 | 0.7192 | 0.0807  | 0.0764 | 0.3067 | 14.6497 | 0.6207 | -3.1622  |
| LargeArteryStroke | log_s_Desulfovibrio_alaskensis         | Inverse variance weighted | 18 | -0.0179 | 0.1021 | 0.8607 | 0.0807  | 0.0764 | 0.3067 | 14.6497 | 0.6207 | -3.1622  |
| LargeArteryStroke | log_s_Desulfovibrio_alaskensis         | Simple mode               | 18 | 0.1219  | 0.2228 | 0.5913 | 0.0807  | 0.0764 | 0.3067 | 14.6497 | 0.6207 | -3.1622  |
| LargeArteryStroke | log_s_Desulfovibrio_alaskensis         | Weighted mode             | 18 | 0.1035  | 0.2215 | 0.6463 | 0.0807  | 0.0764 | 0.3067 | 14.6497 | 0.6207 | -3.1622  |
| LargeArteryStroke | log_s_Enterobacter_asburiae            | MR Egger                  | 18 | 0.6206  | 0.3657 | 0.1090 | -0.1525 | 0.0895 | 0.1078 | 25.9792 | 0.0748 | -0.8763  |
| LargeArteryStroke | log_s_Enterobacter_asburiae            | Weighted median           | 18 | 0.0323  | 0.1479 | 0.8273 | -0.1525 | 0.0895 | 0.1078 | 25.9792 | 0.0748 | -0.8763  |
| LargeArteryStroke | log_s_Enterobacter_asburiae            | Inverse variance weighted | 18 | 0.0320  | 0.1262 | 0.7998 | -0.1525 | 0.0895 | 0.1078 | 25.9792 | 0.0748 | -0.8763  |
| LargeArteryStroke | log_s_Enterobacter_asburiae            | Simple mode               | 18 | -0.0532 | 0.2509 | 0.8344 | -0.1525 | 0.0895 | 0.1078 | 25.9792 | 0.0748 | -0.8763  |
| LargeArteryStroke | log_s_Enterobacter_asburiae            | Weighted mode             | 18 | 0.0195  | 0.2525 | 0.9393 | -0.1525 | 0.0895 | 0.1078 | 25.9792 | 0.0748 | -0.8763  |
| LargeArteryStroke | log_s_Enterobacter_cancerogenus        | MR Egger                  | 18 | 0.4320  | 0.3187 | 0.1940 | -0.1630 | 0.0782 | 0.0535 | 21.4516 | 0.2067 | -8.0352  |
| LargeArteryStroke | log_s_Enterobacter_cancerogenus        | Weighted median           | 18 | -0.2240 | 0.1442 | 0.1205 | -0.1630 | 0.0782 | 0.0535 | 21.4516 | 0.2067 | -8.0352  |
| LargeArteryStroke | log_s_Enterobacter_cancerogenus        | Inverse variance weighted | 18 | -0.1955 | 0.1145 | 0.0877 | -0.1630 | 0.0782 | 0.0535 | 21.4516 | 0.2067 | -8.0352  |
| LargeArteryStroke | log_s_Enterobacter_cancerogenus        | Simple mode               | 18 | -0.3854 | 0.2843 | 0.1929 | -0.1630 | 0.0782 | 0.0535 | 21.4516 | 0.2067 | -8.0352  |
| LargeArteryStroke | log_s_Enterobacter_cancerogenus        | Weighted mode             | 18 | -0.3393 | 0.2803 | 0.2426 | -0.1630 | 0.0782 | 0.0535 | 21.4516 | 0.2067 | -8.0352  |
| LargeArteryStroke | log_s_Escherichia_albertii             | MR Egger                  | 18 | 0.6549  | 0.3638 | 0.0907 | -0.1380 | 0.0891 | 0.1408 | 25.0623 | 0.0933 | -3.3381  |
| LargeArteryStroke | log_s_Escherichia_albertii             | Weighted median           | 18 | 0.0538  | 0.1551 | 0.7288 | -0.1380 | 0.0891 | 0.1408 | 25.0623 | 0.0933 | -3.3381  |
| LargeArteryStroke | log_s_Escherichia_albertii             | Inverse variance weighted | 18 | 0.1222  | 0.1240 | 0.3245 | -0.1380 | 0.0891 | 0.1408 | 25.0623 | 0.0933 | -3.3381  |
| LargeArteryStroke | log_s_Escherichia_albertii             | Simple mode               | 18 | -0.1007 | 0.3143 | 0.7527 | -0.1380 | 0.0891 | 0.1408 | 25.0623 | 0.0933 | -3.3381  |
| LargeArteryStroke | log_s_Escherichia_albertii             | Weighted mode             | 18 | -0.0937 | 0.2755 | 0.7379 | -0.1380 | 0.0891 | 0.1408 | 25.0623 | 0.0933 | -3.3381  |
| LargeArteryStroke | log_s_Eubacterium_cellulosolvens       | MR Egger                  | 18 | -0.6941 | 0.3569 | 0.0696 | 0.1174  | 0.0873 | 0.1976 | 23.2852 | 0.1402 | -0.7132  |
| LargeArteryStroke | log_s_Eubacterium_cellulosolvens       | Weighted median           | 18 | -0.3102 | 0.1499 | 0.0386 | 0.1174  | 0.0873 | 0.1976 | 23.2852 | 0.1402 | -0.7132  |
| LargeArteryStroke | log_s_Eubacterium_cellulosolvens       | Inverse variance weighted | 18 | -0.2407 | 0.1196 | 0.0442 | 0.1174  | 0.0873 | 0.1976 | 23.2852 | 0.1402 | -0.7132  |
| LargeArteryStroke | log_s_Eubacterium_cellulosolvens       | Simple mode               | 18 | -0.3965 | 0.2284 | 0.1007 | 0.1174  | 0.0873 | 0.1976 | 23.2852 | 0.1402 | -0.7132  |
| LargeArteryStroke | log_s_Eubacterium_cellulosolvens       | Weighted mode             | 18 | -0.3606 | 0.2498 | 0.1671 | 0.1174  | 0.0873 | 0.1976 | 23.2852 | 0.1402 | -0.7132  |
| LargeArteryStroke | log_s_Filifactor_alocis                | MR Egger                  | 18 | 0.0187  | 0.3094 | 0.9526 | 0.0001  | 0.0759 | 0.9989 | 14.6946 | 0.5471 | -8.7752  |
| LargeArteryStroke | log_s_Filifactor_alocis                | Weighted median           | 18 | 0.0680  | 0.1392 | 0.6253 | 0.0001  | 0.0759 | 0.9989 | 14.6946 | 0.5471 | -8.7752  |
| LargeArteryStroke | log_s_Filifactor_alocis                | Inverse variance weighted | 18 | 0.0191  | 0.1017 | 0.8511 | 0.0001  | 0.0759 | 0.9989 | 14.6946 | 0.5471 | -8.7752  |
| LargeArteryStroke | log_s_Filifactor_alocis                | Simple mode               | 18 | 0.1923  | 0.2221 | 0.3987 | 0.0001  | 0.0759 | 0.9989 | 14.6946 | 0.5471 | -8.7752  |
| LargeArteryStroke | log_s_Filifactor_alocis                | Weighted mode             | 18 | 0.1725  | 0.2281 | 0.4598 | 0.0001  | 0.0759 | 0.9989 | 14.6946 | 0.5471 | -8.7752  |
| LargeArteryStroke | log_s_Fusobacterium_gonidiaformans     | MR Egger                  | 18 | 0.0536  | 0.3101 | 0.8649 | -0.0434 | 0.0760 | 0.5757 | 12.4496 | 0.7125 | -19.2492 |
| LargeArteryStroke | log_s_Fusobacterium_gonidiaformans     | Weighted median           | 18 | -0.0124 | 0.1314 | 0.9251 | -0.0434 | 0.0760 | 0.5757 | 12.4496 | 0.7125 | -19.2492 |
| LargeArteryStroke | log_s_Fusobacterium_gonidiaformans     | Inverse variance weighted | 18 | -0.1137 | 0.1019 | 0.2644 | -0.0434 | 0.0760 | 0.5757 | 12.4496 | 0.7125 | -19.2492 |
| LargeArteryStroke | log_s_Fusobacterium_gonidiaformans     | Simple mode               | 18 | 0.0321  | 0.2287 | 0.8899 | -0.0434 | 0.0760 | 0.5757 | 12.4496 | 0.7125 | -19.2492 |
| LargeArteryStroke | log_s_Fusobacterium_gonidiaformans     | Weighted mode             | 18 | 0.0209  | 0.2064 | 0.9204 | -0.0434 | 0.0760 | 0.5757 | 12.4496 | 0.7125 | -19.2492 |
| LargeArteryStroke | log_s_Fusobacterium_nucleatum          | MR Egger                  | 18 | 0.0462  | 0.3278 | 0.8898 | -0.0554 | 0.0803 | 0.5003 | 17.5260 | 0.3524 | -7.6705  |
| LargeArteryStroke | log_s_Fusobacterium_nucleatum          | Weighted median           | 18 | -0.1888 | 0.1525 | 0.2158 | -0.0554 | 0.0803 | 0.5003 | 17.5260 | 0.3524 | -7.6705  |
| LargeArteryStroke | log_s_Fusobacterium_nucleatum          | Inverse variance weighted | 18 | -0.1674 | 0.1060 | 0.1142 | -0.0554 | 0.0803 | 0.5003 | 17.5260 | 0.3524 | -7.6705  |
| LargeArteryStroke | log_s_Fusobacterium_nucleatum          | Simple mode               | 18 | 0.1751  | 0.2744 | 0.5319 | -0.0554 | 0.0803 | 0.5003 | 17.5260 | 0.3524 | -7.6705  |
| LargeArteryStroke | log_s_Fusobacterium_nucleatum          | Weighted mode             | 18 | 0.1205  | 0.2624 | 0.6519 | -0.0554 | 0.0803 | 0.5003 | 17.5260 | 0.3524 | -7.6705  |
| LargeArteryStroke | log_s_Fusobacterium_periodonticum      | MR Egger                  | 18 | -0.1323 | 0.3446 | 0.7060 | 0.0370  | 0.0844 | 0.6673 | 19.4305 | 0.2470 | -11.4269 |
| LargeArteryStroke | log_s_Fusobacterium_periodonticum      | Weighted median           | 18 | 0.0706  | 0.1434 | 0.6222 | 0.0370  | 0.0844 | 0.6673 | 19.4305 | 0.2470 | -11.4269 |
| LargeArteryStroke | log_s_Fusobacterium_periodonticum      | Inverse variance weighted | 18 | 0.0103  | 0.1102 | 0.9259 | 0.0370  | 0.0844 | 0.6673 | 19.4305 | 0.2470 | -11.4269 |
| LargeArteryStroke | log_s_Fusobacterium_periodonticum      | Simple mode               | 18 | 0.2118  | 0.2443 | 0.3980 | 0.0370  | 0.0844 | 0.6673 | 19.4305 | 0.2470 | -11.4269 |
| LargeArteryStroke | log_s_Fusobacterium_periodonticum      | Weighted mode             | 18 | 0.1780  | 0.2438 | 0.4754 | 0.0370  | 0.0844 | 0.6673 | 19.4305 | 0.2470 | -11.4269 |
| LargeArteryStroke | log_s_Fusobacterium_ulcerans           | MR Egger                  | 18 | -0.1400 | 0.3150 | 0.6626 | -0.0094 | 0.0772 | 0.9048 | 13.0973 | 0.6656 | -12.7456 |
| LargeArteryStroke | log_s_Fusobacterium_ulcerans           | Weighted median           | 18 | -0.1035 | 0.1490 | 0.4872 | -0.0094 | 0.0772 | 0.9048 | 13.0973 | 0.6656 | -12.7456 |
| LargeArteryStroke | log_s_Fusobacterium_ulcerans           | Inverse variance weighted | 18 | -0.1762 | 0.1035 | 0.0886 | -0.0094 | 0.0772 | 0.9048 | 13.0973 | 0.6656 | -12.7456 |
| LargeArteryStroke | log_s_Fusobacterium_ulcerans           | Simple mode               | 18 | 0.1480  | 0.2824 | 0.6071 | -0.0094 | 0.0772 | 0.9048 | 13.0973 | 0.6656 | -12.7456 |
| LargeArteryStroke | log_s_Fusobacterium_ulcerans           | Weighted mode             | 18 | 0.1423  | 0.2919 | 0.6320 | -0.0094 | 0.0772 | 0.9048 | 13.0973 | 0.6656 | -12.7456 |
| LargeArteryStroke | log_s_Fusobacterium_varium             | MR Egger                  | 18 | 0.0071  | 0.3151 | 0.9824 | -0.0286 | 0.0772 | 0.7162 | 13.0559 | 0.6687 | -4.9037  |

|                   |                                   |                           |    |         |        |        |         |        |        |         |        |          |
|-------------------|-----------------------------------|---------------------------|----|---------|--------|--------|---------|--------|--------|---------|--------|----------|
| LargeArteryStroke | log_s_Fusobacterium_varium        | Weighted median           | 18 | -0.0667 | 0.1438 | 0.6428 | -0.0286 | 0.0772 | 0.7162 | 13.0559 | 0.6687 | -4.9037  |
| LargeArteryStroke | log_s_Fusobacterium_varium        | Inverse variance weighted | 18 | -0.1031 | 0.1032 | 0.3177 | -0.0286 | 0.0772 | 0.7162 | 13.0559 | 0.6687 | -4.9037  |
| LargeArteryStroke | log_s_Fusobacterium_varium        | Simple mode               | 18 | 0.0044  | 0.2113 | 0.9838 | -0.0286 | 0.0772 | 0.7162 | 13.0559 | 0.6687 | -4.9037  |
| LargeArteryStroke | log_s_Fusobacterium_varium        | Weighted mode             | 18 | -0.0209 | 0.2072 | 0.9207 | -0.0286 | 0.0772 | 0.7162 | 13.0559 | 0.6687 | -4.9037  |
| LargeArteryStroke | log_s_Gemella_haemolysans         | MR Egger                  | 18 | 0.5564  | 0.3226 | 0.1038 | -0.0989 | 0.0791 | 0.2292 | 18.9581 | 0.3309 | -19.5809 |
| LargeArteryStroke | log_s_Gemella_haemolysans         | Weighted median           | 18 | 0.0422  | 0.1505 | 0.7794 | -0.0989 | 0.0791 | 0.2292 | 18.9581 | 0.3309 | -19.5809 |
| LargeArteryStroke | log_s_Gemella_haemolysans         | Inverse variance weighted | 18 | 0.1755  | 0.1077 | 0.1031 | -0.0989 | 0.0791 | 0.2292 | 18.9581 | 0.3309 | -19.5809 |
| LargeArteryStroke | log_s_Gemella_haemolysans         | Simple mode               | 18 | -0.1002 | 0.3008 | 0.7432 | -0.0989 | 0.0791 | 0.2292 | 18.9581 | 0.3309 | -19.5809 |
| LargeArteryStroke | log_s_Gemella_haemolysans         | Weighted mode             | 18 | -0.1353 | 0.2705 | 0.6234 | -0.0989 | 0.0791 | 0.2292 | 18.9581 | 0.3309 | -19.5809 |
| LargeArteryStroke | log_s_Lactobacillus_amylovorus    | MR Egger                  | 18 | 0.1794  | 0.3546 | 0.6198 | -0.0039 | 0.0868 | 0.9644 | 20.2355 | 0.2098 | -4.8555  |
| LargeArteryStroke | log_s_Lactobacillus_amylovorus    | Weighted median           | 18 | 0.1868  | 0.1484 | 0.2082 | -0.0039 | 0.0868 | 0.9644 | 20.2355 | 0.2098 | -4.8555  |
| LargeArteryStroke | log_s_Lactobacillus_amylovorus    | Inverse variance weighted | 18 | 0.1642  | 0.1129 | 0.1459 | -0.0039 | 0.0868 | 0.9644 | 20.2355 | 0.2098 | -4.8555  |
| LargeArteryStroke | log_s_Lactobacillus_amylovorus    | Simple mode               | 18 | 0.1474  | 0.2611 | 0.5798 | -0.0039 | 0.0868 | 0.9644 | 20.2355 | 0.2098 | -4.8555  |
| LargeArteryStroke | log_s_Lactobacillus_amylovorus    | Weighted mode             | 18 | 0.0944  | 0.2420 | 0.7013 | -0.0039 | 0.0868 | 0.9644 | 20.2355 | 0.2098 | -4.8555  |
| LargeArteryStroke | log_s_Lactobacillus_casei         | MR Egger                  | 18 | 0.1349  | 0.3147 | 0.6738 | -0.0629 | 0.0771 | 0.4269 | 10.3665 | 0.8468 | -17.6379 |
| LargeArteryStroke | log_s_Lactobacillus_casei         | Weighted median           | 18 | -0.1264 | 0.1393 | 0.3642 | -0.0629 | 0.0771 | 0.4269 | 10.3665 | 0.8468 | -17.6379 |
| LargeArteryStroke | log_s_Lactobacillus_casei         | Inverse variance weighted | 18 | -0.1074 | 0.1032 | 0.2981 | -0.0629 | 0.0771 | 0.4269 | 10.3665 | 0.8468 | -17.6379 |
| LargeArteryStroke | log_s_Lactobacillus_casei         | Simple mode               | 18 | -0.1474 | 0.2388 | 0.5451 | -0.0629 | 0.0771 | 0.4269 | 10.3665 | 0.8468 | -17.6379 |
| LargeArteryStroke | log_s_Lactobacillus_casei         | Weighted mode             | 18 | -0.1329 | 0.2359 | 0.5806 | -0.0629 | 0.0771 | 0.4269 | 10.3665 | 0.8468 | -17.6379 |
| LargeArteryStroke | log_s_Lactobacillus_crispatus     | MR Egger                  | 18 | -0.2532 | 0.4687 | 0.5965 | 0.1053  | 0.1146 | 0.3717 | 35.7384 | 0.0050 | -0.3892  |
| LargeArteryStroke | log_s_Lactobacillus_crispatus     | Weighted median           | 18 | 0.1041  | 0.1554 | 0.5029 | 0.1053  | 0.1146 | 0.3717 | 35.7384 | 0.0050 | -0.3892  |
| LargeArteryStroke | log_s_Lactobacillus_crispatus     | Inverse variance weighted | 18 | 0.1539  | 0.1526 | 0.3131 | 0.1053  | 0.1146 | 0.3717 | 35.7384 | 0.0050 | -0.3892  |
| LargeArteryStroke | log_s_Lactobacillus_crispatus     | Simple mode               | 18 | 0.2427  | 0.2732 | 0.3868 | 0.1053  | 0.1146 | 0.3717 | 35.7384 | 0.0050 | -0.3892  |
| LargeArteryStroke | log_s_Lactobacillus_crispatus     | Weighted mode             | 18 | 0.0120  | 0.2223 | 0.9576 | 0.1053  | 0.1146 | 0.3717 | 35.7384 | 0.0050 | -0.3892  |
| LargeArteryStroke | log_s_Lactobacillus_delbrueckii   | MR Egger                  | 18 | 0.1765  | 0.4147 | 0.6760 | -0.0483 | 0.1015 | 0.6405 | 28.3007 | 0.0291 | -2.2948  |
| LargeArteryStroke | log_s_Lactobacillus_delbrueckii   | Weighted median           | 18 | 0.1270  | 0.1493 | 0.3952 | -0.0483 | 0.1015 | 0.6405 | 28.3007 | 0.0291 | -2.2948  |
| LargeArteryStroke | log_s_Lactobacillus_delbrueckii   | Inverse variance weighted | 18 | -0.0099 | 0.1330 | 0.9405 | -0.0483 | 0.1015 | 0.6405 | 28.3007 | 0.0291 | -2.2948  |
| LargeArteryStroke | log_s_Lactobacillus_delbrueckii   | Simple mode               | 18 | 0.1560  | 0.2509 | 0.5425 | -0.0483 | 0.1015 | 0.6405 | 28.3007 | 0.0291 | -2.2948  |
| LargeArteryStroke | log_s_Lactobacillus_delbrueckii   | Weighted mode             | 18 | 0.1560  | 0.2443 | 0.5317 | -0.0483 | 0.1015 | 0.6405 | 28.3007 | 0.0291 | -2.2948  |
| LargeArteryStroke | log_s_Lactobacillus_fermentum     | MR Egger                  | 18 | -0.5638 | 0.4196 | 0.1978 | 0.1241  | 0.1023 | 0.2428 | 29.9316 | 0.0268 | -0.3757  |
| LargeArteryStroke | log_s_Lactobacillus_fermentum     | Weighted median           | 18 | -0.0858 | 0.1578 | 0.5869 | 0.1241  | 0.1023 | 0.2428 | 29.9316 | 0.0268 | -0.3757  |
| LargeArteryStroke | log_s_Lactobacillus_fermentum     | Inverse variance weighted | 18 | -0.0820 | 0.1371 | 0.5496 | 0.1241  | 0.1023 | 0.2428 | 29.9316 | 0.0268 | -0.3757  |
| LargeArteryStroke | log_s_Lactobacillus_fermentum     | Simple mode               | 18 | -0.0923 | 0.2877 | 0.7523 | 0.1241  | 0.1023 | 0.2428 | 29.9316 | 0.0268 | -0.3757  |
| LargeArteryStroke | log_s_Lactobacillus_fermentum     | Weighted mode             | 18 | -0.0923 | 0.2528 | 0.7195 | 0.1241  | 0.1023 | 0.2428 | 29.9316 | 0.0268 | -0.3757  |
| LargeArteryStroke | log_s_Lactobacillus_gasseri       | MR Egger                  | 18 | 0.3016  | 0.3998 | 0.4616 | -0.0714 | 0.0979 | 0.4762 | 26.3621 | 0.0491 | -2.9249  |
| LargeArteryStroke | log_s_Lactobacillus_gasseri       | Weighted median           | 18 | 0.0947  | 0.1639 | 0.5632 | -0.0714 | 0.0979 | 0.4762 | 26.3621 | 0.0491 | -2.9249  |
| LargeArteryStroke | log_s_Lactobacillus_gasseri       | Inverse variance weighted | 18 | 0.0260  | 0.1290 | 0.8406 | -0.0714 | 0.0979 | 0.4762 | 26.3621 | 0.0491 | -2.9249  |
| LargeArteryStroke | log_s_Lactobacillus_gasseri       | Simple mode               | 18 | 0.3458  | 0.3509 | 0.3381 | -0.0714 | 0.0979 | 0.4762 | 26.3621 | 0.0491 | -2.9249  |
| LargeArteryStroke | log_s_Lactobacillus_gasseri       | Weighted mode             | 18 | 0.4057  | 0.3372 | 0.2454 | -0.0714 | 0.0979 | 0.4762 | 26.3621 | 0.0491 | -2.9249  |
| LargeArteryStroke | log_s_Lactobacillus_reuteri       | MR Egger                  | 18 | 0.0034  | 0.3345 | 0.9921 | 0.0022  | 0.0819 | 0.9791 | 18.4048 | 0.3007 | -6.6974  |
| LargeArteryStroke | log_s_Lactobacillus_reuteri       | Weighted median           | 18 | 0.1507  | 0.1450 | 0.2986 | 0.0022  | 0.0819 | 0.9791 | 18.4048 | 0.3007 | -6.6974  |
| LargeArteryStroke | log_s_Lactobacillus_reuteri       | Inverse variance weighted | 18 | 0.0118  | 0.1062 | 0.9116 | 0.0022  | 0.0819 | 0.9791 | 18.4048 | 0.3007 | -6.6974  |
| LargeArteryStroke | log_s_Lactobacillus_reuteri       | Simple mode               | 18 | 0.2479  | 0.2611 | 0.3557 | 0.0022  | 0.0819 | 0.9791 | 18.4048 | 0.3007 | -6.6974  |
| LargeArteryStroke | log_s_Lactobacillus_reuteri       | Weighted mode             | 18 | 0.2292  | 0.2482 | 0.3688 | 0.0022  | 0.0819 | 0.9791 | 18.4048 | 0.3007 | -6.6974  |
| LargeArteryStroke | log_s_Lactobacillus_vaginalis     | MR Egger                  | 18 | 0.5555  | 0.3095 | 0.0915 | -0.1148 | 0.0758 | 0.1497 | 12.6042 | 0.7623 | -15.7677 |
| LargeArteryStroke | log_s_Lactobacillus_vaginalis     | Weighted median           | 18 | 0.2049  | 0.1355 | 0.1305 | -0.1148 | 0.0758 | 0.1497 | 12.6042 | 0.7623 | -15.7677 |
| LargeArteryStroke | log_s_Lactobacillus_vaginalis     | Inverse variance weighted | 18 | 0.1131  | 0.1016 | 0.2654 | -0.1148 | 0.0758 | 0.1497 | 12.6042 | 0.7623 | -15.7677 |
| LargeArteryStroke | log_s_Lactobacillus_vaginalis     | Simple mode               | 18 | 0.2643  | 0.2657 | 0.3338 | -0.1148 | 0.0758 | 0.1497 | 12.6042 | 0.7623 | -15.7677 |
| LargeArteryStroke | log_s_Lactobacillus_vaginalis     | Weighted mode             | 18 | 0.2736  | 0.2276 | 0.2458 | -0.1148 | 0.0758 | 0.1497 | 12.6042 | 0.7623 | -15.7677 |
| LargeArteryStroke | log_s_Lawsonia_intracellularis    | MR Egger                  | 18 | -0.1010 | 0.3610 | 0.7832 | 0.0068  | 0.0884 | 0.9400 | 20.6095 | 0.1940 | -5.0667  |
| LargeArteryStroke | log_s_Lawsonia_intracellularis    | Weighted median           | 18 | -0.0311 | 0.1540 | 0.8400 | 0.0068  | 0.0884 | 0.9400 | 20.6095 | 0.1940 | -5.0667  |
| LargeArteryStroke | log_s_Lawsonia_intracellularis    | Inverse variance weighted | 18 | -0.0750 | 0.1149 | 0.5142 | 0.0068  | 0.0884 | 0.9400 | 20.6095 | 0.1940 | -5.0667  |
| LargeArteryStroke | log_s_Lawsonia_intracellularis    | Simple mode               | 18 | -0.2853 | 0.2777 | 0.3186 | 0.0068  | 0.0884 | 0.9400 | 20.6095 | 0.1940 | -5.0667  |
| LargeArteryStroke | log_s_Lawsonia_intracellularis    | Weighted mode             | 18 | -0.1625 | 0.2454 | 0.5166 | 0.0068  | 0.0884 | 0.9400 | 20.6095 | 0.1940 | -5.0667  |
| LargeArteryStroke | log_s_Leuconostoc_mesenteroides   | MR Egger                  | 18 | -0.0577 | 0.3132 | 0.8562 | 0.0184  | 0.0768 | 0.8132 | 15.0021 | 0.5245 | -10.9016 |
| LargeArteryStroke | log_s_Leuconostoc_mesenteroides   | Weighted median           | 18 | 0.0025  | 0.1418 | 0.9860 | 0.0184  | 0.0768 | 0.8132 | 15.0021 | 0.5245 | -10.9016 |
| LargeArteryStroke | log_s_Leuconostoc_mesenteroides   | Inverse variance weighted | 18 | 0.0134  | 0.1029 | 0.8962 | 0.0184  | 0.0768 | 0.8132 | 15.0021 | 0.5245 | -10.9016 |
| LargeArteryStroke | log_s_Leuconostoc_mesenteroides   | Simple mode               | 18 | -0.0252 | 0.2350 | 0.9160 | 0.0184  | 0.0768 | 0.8132 | 15.0021 | 0.5245 | -10.9016 |
| LargeArteryStroke | log_s_Leuconostoc_mesenteroides   | Weighted mode             | 18 | 0.0037  | 0.2029 | 0.9856 | 0.0184  | 0.0768 | 0.8132 | 15.0021 | 0.5245 | -10.9016 |
| LargeArteryStroke | log_s_Methylobacillus_flagellatus | MR Egger                  | 18 | 0.5326  | 0.3118 | 0.1070 | -0.1138 | 0.0764 | 0.1557 | 11.7651 | 0.8141 | -10.5636 |
| LargeArteryStroke | log_s_Methylobacillus_flagellatus | Weighted median           | 18 | 0.1976  | 0.1335 | 0.1389 | -0.1138 | 0.0764 | 0.1557 | 11.7651 | 0.8141 | -10.5636 |

|                   |                                   |                           |    |         |        |        |         |        |        |         |        |          |
|-------------------|-----------------------------------|---------------------------|----|---------|--------|--------|---------|--------|--------|---------|--------|----------|
| LargeArteryStroke | log_s_Methylobacillus_flagellatus | Inverse variance weighted | 18 | 0.0937  | 0.1023 | 0.3594 | -0.1138 | 0.0764 | 0.1557 | 11.7651 | 0.8141 | -10.5636 |
| LargeArteryStroke | log_s_Methylobacillus_flagellatus | Simple mode               | 18 | 0.2226  | 0.2498 | 0.3853 | -0.1138 | 0.0764 | 0.1557 | 11.7651 | 0.8141 | -10.5636 |
| LargeArteryStroke | log_s_Methylobacillus_flagellatus | Weighted mode             | 18 | 0.2226  | 0.2407 | 0.3681 | -0.1138 | 0.0764 | 0.1557 | 11.7651 | 0.8141 | -10.5636 |
| LargeArteryStroke | log_s_Mobiluncus_mulieris         | MR Egger                  | 18 | 0.0327  | 0.3160 | 0.9189 | -0.0358 | 0.0775 | 0.6506 | 11.8863 | 0.7518 | -9.5221  |
| LargeArteryStroke | log_s_Mobiluncus_mulieris         | Weighted median           | 18 | -0.0943 | 0.1445 | 0.5141 | -0.0358 | 0.0775 | 0.6506 | 11.8863 | 0.7518 | -9.5221  |
| LargeArteryStroke | log_s_Mobiluncus_mulieris         | Inverse variance weighted | 18 | -0.1050 | 0.1039 | 0.3123 | -0.0358 | 0.0775 | 0.6506 | 11.8863 | 0.7518 | -9.5221  |
| LargeArteryStroke | log_s_Mobiluncus_mulieris         | Simple mode               | 18 | -0.2223 | 0.2466 | 0.3800 | -0.0358 | 0.0775 | 0.6506 | 11.8863 | 0.7518 | -9.5221  |
| LargeArteryStroke | log_s_Mobiluncus_mulieris         | Weighted mode             | 18 | -0.1209 | 0.2425 | 0.6245 | -0.0358 | 0.0775 | 0.6506 | 11.8863 | 0.7518 | -9.5221  |
| LargeArteryStroke | log_s_Neisseria_flavescens        | MR Egger                  | 18 | 0.3122  | 0.3487 | 0.3840 | -0.1034 | 0.0854 | 0.2439 | 21.6925 | 0.1968 | -0.3009  |
| LargeArteryStroke | log_s_Neisseria_flavescens        | Weighted median           | 18 | -0.0665 | 0.1487 | 0.6546 | -0.1034 | 0.0854 | 0.2439 | 21.6925 | 0.1968 | -0.3009  |
| LargeArteryStroke | log_s_Neisseria_flavescens        | Inverse variance weighted | 18 | -0.0865 | 0.1158 | 0.4552 | -0.1034 | 0.0854 | 0.2439 | 21.6925 | 0.1968 | -0.3009  |
| LargeArteryStroke | log_s_Neisseria_flavescens        | Simple mode               | 18 | -0.0518 | 0.2479 | 0.8370 | -0.1034 | 0.0854 | 0.2439 | 21.6925 | 0.1968 | -0.3009  |
| LargeArteryStroke | log_s_Neisseria_flavescens        | Weighted mode             | 18 | -0.0306 | 0.2449 | 0.9022 | -0.1034 | 0.0854 | 0.2439 | 21.6925 | 0.1968 | -0.3009  |
| LargeArteryStroke | log_s_Neisseria_gonorrhoeae       | MR Egger                  | 18 | -0.2778 | 0.3138 | 0.3891 | 0.0629  | 0.0769 | 0.4254 | 15.9946 | 0.4533 | -5.1703  |
| LargeArteryStroke | log_s_Neisseria_gonorrhoeae       | Weighted median           | 18 | 0.0006  | 0.1435 | 0.9964 | 0.0629  | 0.0769 | 0.4254 | 15.9946 | 0.4533 | -5.1703  |
| LargeArteryStroke | log_s_Neisseria_gonorrhoeae       | Inverse variance weighted | 18 | -0.0353 | 0.1028 | 0.7315 | 0.0629  | 0.0769 | 0.4254 | 15.9946 | 0.4533 | -5.1703  |
| LargeArteryStroke | log_s_Neisseria_gonorrhoeae       | Simple mode               | 18 | -0.0126 | 0.2278 | 0.9565 | 0.0629  | 0.0769 | 0.4254 | 15.9946 | 0.4533 | -5.1703  |
| LargeArteryStroke | log_s_Neisseria_gonorrhoeae       | Weighted mode             | 18 | -0.0126 | 0.2095 | 0.9527 | 0.0629  | 0.0769 | 0.4254 | 15.9946 | 0.4533 | -5.1703  |
| LargeArteryStroke | log_s_Neisseria_meningitidis      | MR Egger                  | 18 | -0.0889 | 0.3155 | 0.7818 | 0.0343  | 0.0773 | 0.6634 | 15.2907 | 0.5035 | -17.5318 |
| LargeArteryStroke | log_s_Neisseria_meningitidis      | Weighted median           | 18 | 0.1142  | 0.1494 | 0.4447 | 0.0343  | 0.0773 | 0.6634 | 15.2907 | 0.5035 | -17.5318 |
| LargeArteryStroke | log_s_Neisseria_meningitidis      | Inverse variance weighted | 18 | 0.0433  | 0.1033 | 0.6752 | 0.0343  | 0.0773 | 0.6634 | 15.2907 | 0.5035 | -17.5318 |
| LargeArteryStroke | log_s_Neisseria_meningitidis      | Simple mode               | 18 | -0.3082 | 0.2724 | 0.2737 | 0.0343  | 0.0773 | 0.6634 | 15.2907 | 0.5035 | -17.5318 |
| LargeArteryStroke | log_s_Neisseria_meningitidis      | Weighted mode             | 18 | 0.3004  | 0.2735 | 0.2873 | 0.0343  | 0.0773 | 0.6634 | 15.2907 | 0.5035 | -17.5318 |
| LargeArteryStroke | log_s_Neisseria_mucosa            | MR Egger                  | 18 | -0.3320 | 0.3152 | 0.3077 | 0.0726  | 0.0772 | 0.3610 | 12.0719 | 0.7958 | -12.1543 |
| LargeArteryStroke | log_s_Neisseria_mucosa            | Weighted median           | 18 | -0.1320 | 0.1426 | 0.3545 | 0.0726  | 0.0772 | 0.3610 | 12.0719 | 0.7958 | -12.1543 |
| LargeArteryStroke | log_s_Neisseria_mucosa            | Inverse variance weighted | 18 | -0.0520 | 0.1032 | 0.6143 | 0.0726  | 0.0772 | 0.3610 | 12.0719 | 0.7958 | -12.1543 |
| LargeArteryStroke | log_s_Neisseria_mucosa            | Simple mode               | 18 | -0.2048 | 0.2486 | 0.4215 | 0.0726  | 0.0772 | 0.3610 | 12.0719 | 0.7958 | -12.1543 |
| LargeArteryStroke | log_s_Neisseria_mucosa            | Weighted mode             | 18 | -0.1825 | 0.2422 | 0.4613 | 0.0726  | 0.0772 | 0.3610 | 12.0719 | 0.7958 | -12.1543 |
| LargeArteryStroke | log_s_Neisseria_subflava          | MR Egger                  | 18 | -0.0785 | 0.3122 | 0.8046 | 0.0110  | 0.0765 | 0.8879 | 15.5809 | 0.4826 | -10.9275 |
| LargeArteryStroke | log_s_Neisseria_subflava          | Weighted median           | 18 | 0.0056  | 0.1441 | 0.9691 | 0.0110  | 0.0765 | 0.8879 | 15.5809 | 0.4826 | -10.9275 |
| LargeArteryStroke | log_s_Neisseria_subflava          | Inverse variance weighted | 18 | -0.0363 | 0.1023 | 0.7230 | 0.0110  | 0.0765 | 0.8879 | 15.5809 | 0.4826 | -10.9275 |
| LargeArteryStroke | log_s_Neisseria_subflava          | Simple mode               | 18 | 0.0538  | 0.2393 | 0.8250 | 0.0110  | 0.0765 | 0.8879 | 15.5809 | 0.4826 | -10.9275 |
| LargeArteryStroke | log_s_Neisseria_subflava          | Weighted mode             | 18 | 0.0647  | 0.2239 | 0.7762 | 0.0110  | 0.0765 | 0.8879 | 15.5809 | 0.4826 | -10.9275 |
| LargeArteryStroke | log_s_Oscillibacter_valericigenes | MR Egger                  | 18 | 0.0630  | 0.5043 | 0.9021 | 0.0156  | 0.1234 | 0.9009 | 40.7787 | 0.0006 | -2.0188  |
| LargeArteryStroke | log_s_Oscillibacter_valericigenes | Weighted median           | 18 | -0.1105 | 0.1750 | 0.5278 | 0.0156  | 0.1234 | 0.9009 | 40.7787 | 0.0006 | -2.0188  |
| LargeArteryStroke | log_s_Oscillibacter_valericigenes | Inverse variance weighted | 18 | 0.1232  | 0.1605 | 0.4426 | 0.0156  | 0.1234 | 0.9009 | 40.7787 | 0.0006 | -2.0188  |
| LargeArteryStroke | log_s_Oscillibacter_valericigenes | Simple mode               | 18 | -0.3023 | 0.3356 | 0.3803 | 0.0156  | 0.1234 | 0.9009 | 40.7787 | 0.0006 | -2.0188  |
| LargeArteryStroke | log_s_Oscillibacter_valericigenes | Weighted mode             | 18 | -0.2315 | 0.2949 | 0.4433 | 0.0156  | 0.1234 | 0.9009 | 40.7787 | 0.0006 | -2.0188  |
| LargeArteryStroke | log_s_Pantoea_ananatis            | MR Egger                  | 18 | 0.2479  | 0.3324 | 0.4665 | -0.0829 | 0.0813 | 0.3233 | 19.2894 | 0.3122 | -0.8688  |
| LargeArteryStroke | log_s_Pantoea_ananatis            | Weighted median           | 18 | -0.0221 | 0.1472 | 0.8804 | -0.0829 | 0.0813 | 0.3233 | 19.2894 | 0.3122 | -0.8688  |
| LargeArteryStroke | log_s_Pantoea_ananatis            | Inverse variance weighted | 18 | -0.0721 | 0.1088 | 0.5074 | -0.0829 | 0.0813 | 0.3233 | 19.2894 | 0.3122 | -0.8688  |
| LargeArteryStroke | log_s_Pantoea_ananatis            | Simple mode               | 18 | -0.0856 | 0.2695 | 0.7547 | -0.0829 | 0.0813 | 0.3233 | 19.2894 | 0.3122 | -0.8688  |
| LargeArteryStroke | log_s_Pantoea_ananatis            | Weighted mode             | 18 | -0.0337 | 0.2744 | 0.9036 | -0.0829 | 0.0813 | 0.3233 | 19.2894 | 0.3122 | -0.8688  |
| LargeArteryStroke | log_s_Peptoniphilus_duerdenii     | MR Egger                  | 18 | 0.0943  | 0.3165 | 0.7696 | -0.0351 | 0.0776 | 0.6572 | 16.2019 | 0.4390 | -0.4052  |
| LargeArteryStroke | log_s_Peptoniphilus_duerdenii     | Weighted median           | 18 | -0.0404 | 0.1423 | 0.7768 | -0.0351 | 0.0776 | 0.6572 | 16.2019 | 0.4390 | -0.4052  |
| LargeArteryStroke | log_s_Peptoniphilus_duerdenii     | Inverse variance weighted | 18 | -0.0408 | 0.1035 | 0.6931 | -0.0351 | 0.0776 | 0.6572 | 16.2019 | 0.4390 | -0.4052  |
| LargeArteryStroke | log_s_Peptoniphilus_duerdenii     | Simple mode               | 18 | -0.0036 | 0.2080 | 0.9865 | -0.0351 | 0.0776 | 0.6572 | 16.2019 | 0.4390 | -0.4052  |
| LargeArteryStroke | log_s_Peptoniphilus_duerdenii     | Weighted mode             | 18 | -0.0112 | 0.1978 | 0.9557 | -0.0351 | 0.0776 | 0.6572 | 16.2019 | 0.4390 | -0.4052  |
| LargeArteryStroke | log_s_Peptoniphilus_harei         | MR Egger                  | 18 | 0.0710  | 0.3160 | 0.8251 | -0.0011 | 0.0775 | 0.9885 | 10.4233 | 0.8436 | -24.0026 |
| LargeArteryStroke | log_s_Peptoniphilus_harei         | Weighted median           | 18 | -0.0004 | 0.1391 | 0.9979 | -0.0011 | 0.0775 | 0.9885 | 10.4233 | 0.8436 | -24.0026 |
| LargeArteryStroke | log_s_Peptoniphilus_harei         | Inverse variance weighted | 18 | 0.0666  | 0.1040 | 0.5220 | -0.0011 | 0.0775 | 0.9885 | 10.4233 | 0.8436 | -24.0026 |
| LargeArteryStroke | log_s_Peptoniphilus_harei         | Simple mode               | 18 | -0.0320 | 0.2702 | 0.9072 | -0.0011 | 0.0775 | 0.9885 | 10.4233 | 0.8436 | -24.0026 |
| LargeArteryStroke | log_s_Peptoniphilus_harei         | Weighted mode             | 18 | -0.0186 | 0.2495 | 0.9414 | -0.0011 | 0.0775 | 0.9885 | 10.4233 | 0.8436 | -24.0026 |
| LargeArteryStroke | log_s_Porphyromonas_endodontalis  | MR Egger                  | 18 | 0.1954  | 0.3465 | 0.5806 | -0.0580 | 0.0848 | 0.5040 | 19.7867 | 0.2300 | -3.7319  |
| LargeArteryStroke | log_s_Porphyromonas_endodontalis  | Weighted median           | 18 | 0.0513  | 0.1445 | 0.7225 | -0.0580 | 0.0848 | 0.5040 | 19.7867 | 0.2300 | -3.7319  |
| LargeArteryStroke | log_s_Porphyromonas_endodontalis  | Inverse variance weighted | 18 | -0.0284 | 0.1117 | 0.7995 | -0.0580 | 0.0848 | 0.5040 | 19.7867 | 0.2300 | -3.7319  |
| LargeArteryStroke | log_s_Porphyromonas_endodontalis  | Simple mode               | 18 | 0.0488  | 0.2828 | 0.8650 | -0.0580 | 0.0848 | 0.5040 | 19.7867 | 0.2300 | -3.7319  |
| LargeArteryStroke | log_s_Porphyromonas_endodontalis  | Weighted mode             | 18 | 0.1001  | 0.2606 | 0.7056 | -0.0580 | 0.0848 | 0.5040 | 19.7867 | 0.2300 | -3.7319  |
| LargeArteryStroke | log_s_Porphyromonas_gingivalis    | MR Egger                  | 18 | -0.2555 | 0.3132 | 0.4267 | 0.0979  | 0.0768 | 0.2206 | 14.9253 | 0.6009 | -14.4702 |
| LargeArteryStroke | log_s_Porphyromonas_gingivalis    | Weighted median           | 18 | 0.2303  | 0.1411 | 0.1025 | 0.0979  | 0.0768 | 0.2206 | 14.9253 | 0.6009 | -14.4702 |
| LargeArteryStroke | log_s_Porphyromonas_gingivalis    | Inverse variance weighted | 18 | 0.1218  | 0.1027 | 0.2358 | 0.0979  | 0.0768 | 0.2206 | 14.9253 | 0.6009 | -14.4702 |

|                   |                                     |                           |    |         |        |        |         |        |        |         |        |          |
|-------------------|-------------------------------------|---------------------------|----|---------|--------|--------|---------|--------|--------|---------|--------|----------|
| LargeArteryStroke | log_s_Porphyrmonas_gingivalis       | Simple mode               | 18 | 0.2739  | 0.2536 | 0.2952 | 0.0979  | 0.0768 | 0.2206 | 14.9253 | 0.6009 | -14.4702 |
| LargeArteryStroke | log_s_Porphyrmonas_gingivalis       | Weighted mode             | 18 | 0.2827  | 0.2399 | 0.2550 | 0.0979  | 0.0768 | 0.2206 | 14.9253 | 0.6009 | -14.4702 |
| LargeArteryStroke | log_s_Porphyrmonas_uenonis          | MR Egger                  | 18 | 0.2687  | 0.3683 | 0.4762 | -0.0560 | 0.0903 | 0.5443 | 21.2748 | 0.1682 | -1.4104  |
| LargeArteryStroke | log_s_Porphyrmonas_uenonis          | Weighted median           | 18 | 0.0838  | 0.1476 | 0.5704 | -0.0560 | 0.0903 | 0.5443 | 21.2748 | 0.1682 | -1.4104  |
| LargeArteryStroke | log_s_Porphyrmonas_uenonis          | Inverse variance weighted | 18 | 0.0532  | 0.1189 | 0.6545 | -0.0560 | 0.0903 | 0.5443 | 21.2748 | 0.1682 | -1.4104  |
| LargeArteryStroke | log_s_Porphyrmonas_uenonis          | Simple mode               | 18 | 0.1617  | 0.2351 | 0.5009 | -0.0560 | 0.0903 | 0.5443 | 21.2748 | 0.1682 | -1.4104  |
| LargeArteryStroke | log_s_Porphyrmonas_uenonis          | Weighted mode             | 18 | 0.1358  | 0.2170 | 0.5397 | -0.0560 | 0.0903 | 0.5443 | 21.2748 | 0.1682 | -1.4104  |
| LargeArteryStroke | log_s_Prevotella_amnii              | MR Egger                  | 18 | 0.1008  | 0.3341 | 0.7667 | -0.0226 | 0.0819 | 0.7859 | 18.1672 | 0.3142 | -16.7163 |
| LargeArteryStroke | log_s_Prevotella_amnii              | Weighted median           | 18 | 0.0343  | 0.1454 | 0.8132 | -0.0226 | 0.0819 | 0.7859 | 18.1672 | 0.3142 | -16.7163 |
| LargeArteryStroke | log_s_Prevotella_amnii              | Inverse variance weighted | 18 | 0.0136  | 0.1066 | 0.8983 | -0.0226 | 0.0819 | 0.7859 | 18.1672 | 0.3142 | -16.7163 |
| LargeArteryStroke | log_s_Prevotella_amnii              | Simple mode               | 18 | 0.2381  | 0.3082 | 0.4503 | -0.0226 | 0.0819 | 0.7859 | 18.1672 | 0.3142 | -16.7163 |
| LargeArteryStroke | log_s_Prevotella_amnii              | Weighted mode             | 18 | -0.3828 | 0.2982 | 0.2164 | -0.0226 | 0.0819 | 0.7859 | 18.1672 | 0.3142 | -16.7163 |
| LargeArteryStroke | log_s_Prevotella_bryantii           | MR Egger                  | 18 | -0.1670 | 0.3374 | 0.6274 | 0.0208  | 0.0827 | 0.8043 | 18.8978 | 0.2740 | -14.6260 |
| LargeArteryStroke | log_s_Prevotella_bryantii           | Weighted median           | 18 | -0.0835 | 0.1452 | 0.5653 | 0.0208  | 0.0827 | 0.8043 | 18.8978 | 0.2740 | -14.6260 |
| LargeArteryStroke | log_s_Prevotella_bryantii           | Inverse variance weighted | 18 | -0.0866 | 0.1075 | 0.4204 | 0.0208  | 0.0827 | 0.8043 | 18.8978 | 0.2740 | -14.6260 |
| LargeArteryStroke | log_s_Prevotella_bryantii           | Simple mode               | 18 | -0.0546 | 0.2911 | 0.8534 | 0.0208  | 0.0827 | 0.8043 | 18.8978 | 0.2740 | -14.6260 |
| LargeArteryStroke | log_s_Prevotella_bryantii           | Weighted mode             | 18 | -0.2335 | 0.2754 | 0.4083 | 0.0208  | 0.0827 | 0.8043 | 18.8978 | 0.2740 | -14.6260 |
| LargeArteryStroke | log_s_Prevotella_dentalis           | MR Egger                  | 18 | -0.0945 | 0.3150 | 0.7682 | 0.0277  | 0.0773 | 0.7250 | 16.5153 | 0.4176 | -9.1299  |
| LargeArteryStroke | log_s_Prevotella_dentalis           | Weighted median           | 18 | 0.0296  | 0.1448 | 0.8378 | 0.0277  | 0.0773 | 0.7250 | 16.5153 | 0.4176 | -9.1299  |
| LargeArteryStroke | log_s_Prevotella_dentalis           | Inverse variance weighted | 18 | 0.0121  | 0.1019 | 0.9056 | 0.0277  | 0.0773 | 0.7250 | 16.5153 | 0.4176 | -9.1299  |
| LargeArteryStroke | log_s_Prevotella_dentalis           | Simple mode               | 18 | 0.0216  | 0.2453 | 0.9307 | 0.0277  | 0.0773 | 0.7250 | 16.5153 | 0.4176 | -9.1299  |
| LargeArteryStroke | log_s_Prevotella_dentalis           | Weighted mode             | 18 | 0.0432  | 0.2210 | 0.8472 | 0.0277  | 0.0773 | 0.7250 | 16.5153 | 0.4176 | -9.1299  |
| LargeArteryStroke | log_s_Prevotella_marshii            | MR Egger                  | 18 | -0.7643 | 0.3228 | 0.0308 | 0.1957  | 0.0790 | 0.0247 | 23.4279 | 0.1358 | -2.4256  |
| LargeArteryStroke | log_s_Prevotella_marshii            | Weighted median           | 18 | -0.0218 | 0.1543 | 0.8878 | 0.1957  | 0.0790 | 0.0247 | 23.4279 | 0.1358 | -2.4256  |
| LargeArteryStroke | log_s_Prevotella_marshii            | Inverse variance weighted | 18 | -0.0078 | 0.1201 | 0.9481 | 0.1957  | 0.0790 | 0.0247 | 23.4279 | 0.1358 | -2.4256  |
| LargeArteryStroke | log_s_Prevotella_marshii            | Simple mode               | 18 | -0.0149 | 0.3134 | 0.9625 | 0.1957  | 0.0790 | 0.0247 | 23.4279 | 0.1358 | -2.4256  |
| LargeArteryStroke | log_s_Prevotella_marshii            | Weighted mode             | 18 | -0.0742 | 0.2943 | 0.8039 | 0.1957  | 0.0790 | 0.0247 | 23.4279 | 0.1358 | -2.4256  |
| LargeArteryStroke | log_s_Prevotella_melaninogenica     | MR Egger                  | 18 | -0.1346 | 0.3121 | 0.6719 | 0.0387  | 0.0765 | 0.6197 | 8.6866  | 0.9258 | -29.8695 |
| LargeArteryStroke | log_s_Prevotella_melaninogenica     | Weighted median           | 18 | 0.0935  | 0.1353 | 0.4897 | 0.0387  | 0.0765 | 0.6197 | 8.6866  | 0.9258 | -29.8695 |
| LargeArteryStroke | log_s_Prevotella_melaninogenica     | Inverse variance weighted | 18 | 0.0146  | 0.1022 | 0.8867 | 0.0387  | 0.0765 | 0.6197 | 8.6866  | 0.9258 | -29.8695 |
| LargeArteryStroke | log_s_Prevotella_melaninogenica     | Simple mode               | 18 | 0.1674  | 0.2276 | 0.4721 | 0.0387  | 0.0765 | 0.6197 | 8.6866  | 0.9258 | -29.8695 |
| LargeArteryStroke | log_s_Prevotella_melaninogenica     | Weighted mode             | 18 | 0.1592  | 0.2363 | 0.5094 | 0.0387  | 0.0765 | 0.6197 | 8.6866  | 0.9258 | -29.8695 |
| LargeArteryStroke | log_s_Prevotella_multiformis        | MR Egger                  | 18 | 0.0274  | 0.3216 | 0.9331 | 0.0065  | 0.0788 | 0.9350 | 17.0178 | 0.3844 | -1.0305  |
| LargeArteryStroke | log_s_Prevotella_multiformis        | Weighted median           | 18 | 0.0196  | 0.1418 | 0.8902 | 0.0065  | 0.0788 | 0.9350 | 17.0178 | 0.3844 | -1.0305  |
| LargeArteryStroke | log_s_Prevotella_multiformis        | Inverse variance weighted | 18 | 0.0526  | 0.1023 | 0.6073 | 0.0065  | 0.0788 | 0.9350 | 17.0178 | 0.3844 | -1.0305  |
| LargeArteryStroke | log_s_Prevotella_multiformis        | Simple mode               | 18 | 0.0198  | 0.2348 | 0.9338 | 0.0065  | 0.0788 | 0.9350 | 17.0178 | 0.3844 | -1.0305  |
| LargeArteryStroke | log_s_Prevotella_multiformis        | Weighted mode             | 18 | 0.0349  | 0.2399 | 0.8862 | 0.0065  | 0.0788 | 0.9350 | 17.0178 | 0.3844 | -1.0305  |
| LargeArteryStroke | log_s_Prevotella_multisaccharivorax | MR Egger                  | 18 | -0.1122 | 0.3117 | 0.7236 | 0.0296  | 0.0764 | 0.7039 | 11.9762 | 0.7456 | -12.5921 |
| LargeArteryStroke | log_s_Prevotella_multisaccharivorax | Weighted median           | 18 | -0.0544 | 0.1346 | 0.6860 | 0.0296  | 0.0764 | 0.7039 | 11.9762 | 0.7456 | -12.5921 |
| LargeArteryStroke | log_s_Prevotella_multisaccharivorax | Inverse variance weighted | 18 | 0.0017  | 0.1023 | 0.9867 | 0.0296  | 0.0764 | 0.7039 | 11.9762 | 0.7456 | -12.5921 |
| LargeArteryStroke | log_s_Prevotella_multisaccharivorax | Simple mode               | 18 | -0.0949 | 0.2255 | 0.6791 | 0.0296  | 0.0764 | 0.7039 | 11.9762 | 0.7456 | -12.5921 |
| LargeArteryStroke | log_s_Prevotella_multisaccharivorax | Weighted mode             | 18 | -0.0841 | 0.2190 | 0.7057 | 0.0296  | 0.0764 | 0.7039 | 11.9762 | 0.7456 | -12.5921 |
| LargeArteryStroke | log_s_Prevotella_nigrescens         | MR Egger                  | 18 | 0.0475  | 0.4020 | 0.9074 | -0.0037 | 0.0985 | 0.9702 | 26.6089 | 0.0460 | -9.5915  |
| LargeArteryStroke | log_s_Prevotella_nigrescens         | Weighted median           | 18 | 0.0438  | 0.1538 | 0.7759 | -0.0037 | 0.0985 | 0.9702 | 26.6089 | 0.0460 | -9.5915  |
| LargeArteryStroke | log_s_Prevotella_nigrescens         | Inverse variance weighted | 18 | 0.0331  | 0.1278 | 0.7957 | -0.0037 | 0.0985 | 0.9702 | 26.6089 | 0.0460 | -9.5915  |
| LargeArteryStroke | log_s_Prevotella_nigrescens         | Simple mode               | 18 | -0.0271 | 0.2824 | 0.9247 | -0.0037 | 0.0985 | 0.9702 | 26.6089 | 0.0460 | -9.5915  |
| LargeArteryStroke | log_s_Prevotella_nigrescens         | Weighted mode             | 18 | 0.0242  | 0.2656 | 0.9284 | -0.0037 | 0.0985 | 0.9702 | 26.6089 | 0.0460 | -9.5915  |
| LargeArteryStroke | log_s_Prevotella_pallens            | MR Egger                  | 18 | -0.1895 | 0.3100 | 0.5497 | 0.0328  | 0.0760 | 0.6721 | 11.9681 | 0.7462 | -8.0311  |
| LargeArteryStroke | log_s_Prevotella_pallens            | Weighted median           | 18 | 0.0143  | 0.1416 | 0.9197 | 0.0328  | 0.0760 | 0.6721 | 11.9681 | 0.7462 | -8.0311  |
| LargeArteryStroke | log_s_Prevotella_pallens            | Inverse variance weighted | 18 | -0.0632 | 0.1018 | 0.5347 | 0.0328  | 0.0760 | 0.6721 | 11.9681 | 0.7462 | -8.0311  |
| LargeArteryStroke | log_s_Prevotella_pallens            | Simple mode               | 18 | 0.1359  | 0.2504 | 0.5944 | 0.0328  | 0.0760 | 0.6721 | 11.9681 | 0.7462 | -8.0311  |
| LargeArteryStroke | log_s_Prevotella_pallens            | Weighted mode             | 18 | 0.1042  | 0.2363 | 0.6647 | 0.0328  | 0.0760 | 0.6721 | 11.9681 | 0.7462 | -8.0311  |
| LargeArteryStroke | log_s_Prevotella_salivae            | MR Egger                  | 18 | 0.0992  | 0.3108 | 0.7537 | -0.0083 | 0.0762 | 0.9148 | 9.7862  | 0.8776 | -38.8820 |
| LargeArteryStroke | log_s_Prevotella_salivae            | Weighted median           | 18 | 0.0128  | 0.1381 | 0.9261 | -0.0083 | 0.0762 | 0.9148 | 9.7862  | 0.8776 | -38.8820 |
| LargeArteryStroke | log_s_Prevotella_salivae            | Inverse variance weighted | 18 | 0.0673  | 0.1022 | 0.5101 | -0.0083 | 0.0762 | 0.9148 | 9.7862  | 0.8776 | -38.8820 |
| LargeArteryStroke | log_s_Prevotella_salivae            | Simple mode               | 18 | -0.0740 | 0.2491 | 0.7700 | -0.0083 | 0.0762 | 0.9148 | 9.7862  | 0.8776 | -38.8820 |
| LargeArteryStroke | log_s_Prevotella_salivae            | Weighted mode             | 18 | -0.0874 | 0.2537 | 0.7348 | -0.0083 | 0.0762 | 0.9148 | 9.7862  | 0.8776 | -38.8820 |
| LargeArteryStroke | log_s_Prevotella_veroralis          | MR Egger                  | 18 | -0.2599 | 0.3286 | 0.4405 | 0.0494  | 0.0805 | 0.5475 | 17.7663 | 0.3378 | -0.4170  |
| LargeArteryStroke | log_s_Prevotella_veroralis          | Weighted median           | 18 | 0.0357  | 0.1372 | 0.7949 | 0.0494  | 0.0805 | 0.5475 | 17.7663 | 0.3378 | -0.4170  |
| LargeArteryStroke | log_s_Prevotella_veroralis          | Inverse variance weighted | 18 | -0.0691 | 0.1056 | 0.5129 | 0.0494  | 0.0805 | 0.5475 | 17.7663 | 0.3378 | -0.4170  |
| LargeArteryStroke | log_s_Prevotella_veroralis          | Simple mode               | 18 | 0.0848  | 0.2469 | 0.7354 | 0.0494  | 0.0805 | 0.5475 | 17.7663 | 0.3378 | -0.4170  |

|                   |                                      |                           |    |         |        |        |         |        |        |         |        |          |
|-------------------|--------------------------------------|---------------------------|----|---------|--------|--------|---------|--------|--------|---------|--------|----------|
| LargeArteryStroke | log_s_Prevotella_veroralis           | Weighted mode             | 18 | 0.0931  | 0.2162 | 0.6722 | 0.0494  | 0.0805 | 0.5475 | 17.7663 | 0.3378 | -0.4170  |
| LargeArteryStroke | log_s_Pseudomonas_stutzeri           | MR Egger                  | 18 | 0.3726  | 0.3772 | 0.3380 | -0.0638 | 0.0924 | 0.4994 | 23.2036 | 0.1084 | -1.0065  |
| LargeArteryStroke | log_s_Pseudomonas_stutzeri           | Weighted median           | 18 | 0.0509  | 0.1423 | 0.7206 | -0.0638 | 0.0924 | 0.4994 | 23.2036 | 0.1084 | -1.0065  |
| LargeArteryStroke | log_s_Pseudomonas_stutzeri           | Inverse variance weighted | 18 | 0.1263  | 0.1217 | 0.2992 | -0.0638 | 0.0924 | 0.4994 | 23.2036 | 0.1084 | -1.0065  |
| LargeArteryStroke | log_s_Pseudomonas_stutzeri           | Simple mode               | 18 | -0.1813 | 0.2588 | 0.4932 | -0.0638 | 0.0924 | 0.4994 | 23.2036 | 0.1084 | -1.0065  |
| LargeArteryStroke | log_s_Pseudomonas_stutzeri           | Weighted mode             | 18 | -0.1635 | 0.2550 | 0.5299 | -0.0638 | 0.0924 | 0.4994 | 23.2036 | 0.1084 | -1.0065  |
| LargeArteryStroke | log_s_Ruminococcus_flavefaciens      | MR Egger                  | 18 | -0.2036 | 0.3148 | 0.5270 | 0.0789  | 0.0772 | 0.3216 | 16.6788 | 0.4763 | -11.6184 |
| LargeArteryStroke | log_s_Ruminococcus_flavefaciens      | Weighted median           | 18 | 0.1071  | 0.1485 | 0.4707 | 0.0789  | 0.0772 | 0.3216 | 16.6788 | 0.4763 | -11.6184 |
| LargeArteryStroke | log_s_Ruminococcus_flavefaciens      | Inverse variance weighted | 18 | 0.1005  | 0.1035 | 0.3315 | 0.0789  | 0.0772 | 0.3216 | 16.6788 | 0.4763 | -11.6184 |
| LargeArteryStroke | log_s_Ruminococcus_flavefaciens      | Simple mode               | 18 | 0.0686  | 0.2502 | 0.7872 | 0.0789  | 0.0772 | 0.3216 | 16.6788 | 0.4763 | -11.6184 |
| LargeArteryStroke | log_s_Ruminococcus_flavefaciens      | Weighted mode             | 18 | 0.0800  | 0.2337 | 0.7363 | 0.0789  | 0.0772 | 0.3216 | 16.6788 | 0.4763 | -11.6184 |
| LargeArteryStroke | log_s_Serratia_odorifera             | MR Egger                  | 18 | 0.2463  | 0.4230 | 0.5685 | -0.0500 | 0.1036 | 0.6363 | 29.6006 | 0.0202 | -0.6591  |
| LargeArteryStroke | log_s_Serratia_odorifera             | Weighted median           | 18 | 0.1672  | 0.1497 | 0.2640 | -0.0500 | 0.1036 | 0.6363 | 29.6006 | 0.0202 | -0.6591  |
| LargeArteryStroke | log_s_Serratia_odorifera             | Inverse variance weighted | 18 | 0.0537  | 0.1356 | 0.6922 | -0.0500 | 0.1036 | 0.6363 | 29.6006 | 0.0202 | -0.6591  |
| LargeArteryStroke | log_s_Serratia_odorifera             | Simple mode               | 18 | 0.1857  | 0.2637 | 0.4910 | -0.0500 | 0.1036 | 0.6363 | 29.6006 | 0.0202 | -0.6591  |
| LargeArteryStroke | log_s_Serratia_odorifera             | Weighted mode             | 18 | 0.2105  | 0.2432 | 0.3989 | -0.0500 | 0.1036 | 0.6363 | 29.6006 | 0.0202 | -0.6591  |
| LargeArteryStroke | log_s_Shewanella_putrefaciens        | MR Egger                  | 18 | 0.3259  | 0.3220 | 0.3266 | -0.0747 | 0.0789 | 0.3578 | 17.0019 | 0.3855 | -0.2499  |
| LargeArteryStroke | log_s_Shewanella_putrefaciens        | Weighted median           | 18 | 0.2325  | 0.1444 | 0.1073 | -0.0747 | 0.0789 | 0.3578 | 17.0019 | 0.3855 | -0.2499  |
| LargeArteryStroke | log_s_Shewanella_putrefaciens        | Inverse variance weighted | 18 | 0.0378  | 0.1052 | 0.7192 | -0.0747 | 0.0789 | 0.3578 | 17.0019 | 0.3855 | -0.2499  |
| LargeArteryStroke | log_s_Shewanella_putrefaciens        | Simple mode               | 18 | 0.2236  | 0.2571 | 0.3966 | -0.0747 | 0.0789 | 0.3578 | 17.0019 | 0.3855 | -0.2499  |
| LargeArteryStroke | log_s_Shewanella_putrefaciens        | Weighted mode             | 18 | 0.2509  | 0.2093 | 0.2472 | -0.0747 | 0.0789 | 0.3578 | 17.0019 | 0.3855 | -0.2499  |
| LargeArteryStroke | log_s_Slackia_exigua                 | MR Egger                  | 18 | 0.0201  | 0.3366 | 0.9532 | -0.0271 | 0.0825 | 0.7466 | 18.7577 | 0.2814 | -0.2628  |
| LargeArteryStroke | log_s_Slackia_exigua                 | Weighted median           | 18 | -0.1418 | 0.1459 | 0.3310 | -0.0271 | 0.0825 | 0.7466 | 18.7577 | 0.2814 | -0.2628  |
| LargeArteryStroke | log_s_Slackia_exigua                 | Inverse variance weighted | 18 | -0.0845 | 0.1077 | 0.4326 | -0.0271 | 0.0825 | 0.7466 | 18.7577 | 0.2814 | -0.2628  |
| LargeArteryStroke | log_s_Slackia_exigua                 | Simple mode               | 18 | -0.1689 | 0.2537 | 0.5143 | -0.0271 | 0.0825 | 0.7466 | 18.7577 | 0.2814 | -0.2628  |
| LargeArteryStroke | log_s_Slackia_exigua                 | Weighted mode             | 18 | -0.1596 | 0.2457 | 0.5247 | -0.0271 | 0.0825 | 0.7466 | 18.7577 | 0.2814 | -0.2628  |
| LargeArteryStroke | log_s_Staphylococcus_aureus          | MR Egger                  | 18 | -0.0811 | 0.3110 | 0.7975 | 0.0490  | 0.0762 | 0.5289 | 14.7682 | 0.5417 | -9.9906  |
| LargeArteryStroke | log_s_Staphylococcus_aureus          | Weighted median           | 18 | 0.1540  | 0.1451 | 0.2886 | 0.0490  | 0.0762 | 0.5289 | 14.7682 | 0.5417 | -9.9906  |
| LargeArteryStroke | log_s_Staphylococcus_aureus          | Inverse variance weighted | 18 | 0.1080  | 0.1019 | 0.2893 | 0.0490  | 0.0762 | 0.5289 | 14.7682 | 0.5417 | -9.9906  |
| LargeArteryStroke | log_s_Staphylococcus_aureus          | Simple mode               | 18 | 0.3487  | 0.2756 | 0.2229 | 0.0490  | 0.0762 | 0.5289 | 14.7682 | 0.5417 | -9.9906  |
| LargeArteryStroke | log_s_Staphylococcus_aureus          | Weighted mode             | 18 | 0.2573  | 0.2335 | 0.2859 | 0.0490  | 0.0762 | 0.5289 | 14.7682 | 0.5417 | -9.9906  |
| LargeArteryStroke | log_s_Streptococcus_constellatus     | MR Egger                  | 18 | -0.1552 | 0.3150 | 0.6290 | 0.0554  | 0.0772 | 0.4834 | 16.4154 | 0.4244 | -12.7785 |
| LargeArteryStroke | log_s_Streptococcus_constellatus     | Weighted median           | 18 | -0.0282 | 0.1423 | 0.8431 | 0.0554  | 0.0772 | 0.4834 | 16.4154 | 0.4244 | -12.7785 |
| LargeArteryStroke | log_s_Streptococcus_constellatus     | Inverse variance weighted | 18 | 0.0583  | 0.1022 | 0.5684 | 0.0554  | 0.0772 | 0.4834 | 16.4154 | 0.4244 | -12.7785 |
| LargeArteryStroke | log_s_Streptococcus_constellatus     | Simple mode               | 18 | -0.0271 | 0.2669 | 0.9204 | 0.0554  | 0.0772 | 0.4834 | 16.4154 | 0.4244 | -12.7785 |
| LargeArteryStroke | log_s_Streptococcus_constellatus     | Weighted mode             | 18 | -0.0694 | 0.2319 | 0.7682 | 0.0554  | 0.0772 | 0.4834 | 16.4154 | 0.4244 | -12.7785 |
| LargeArteryStroke | log_s_Streptococcus_cristatus        | MR Egger                  | 18 | 0.3300  | 0.3214 | 0.3199 | -0.1313 | 0.0787 | 0.1147 | 19.8985 | 0.2795 | -2.1456  |
| LargeArteryStroke | log_s_Streptococcus_cristatus        | Weighted median           | 18 | -0.0584 | 0.1468 | 0.6906 | -0.1313 | 0.0787 | 0.1147 | 19.8985 | 0.2795 | -2.1456  |
| LargeArteryStroke | log_s_Streptococcus_cristatus        | Inverse variance weighted | 18 | -0.1769 | 0.1104 | 0.1092 | -0.1313 | 0.0787 | 0.1147 | 19.8985 | 0.2795 | -2.1456  |
| LargeArteryStroke | log_s_Streptococcus_cristatus        | Simple mode               | 18 | -0.1146 | 0.2940 | 0.7015 | -0.1313 | 0.0787 | 0.1147 | 19.8985 | 0.2795 | -2.1456  |
| LargeArteryStroke | log_s_Streptococcus_cristatus        | Weighted mode             | 18 | -0.0660 | 0.2460 | 0.7916 | -0.1313 | 0.0787 | 0.1147 | 19.8985 | 0.2795 | -2.1456  |
| LargeArteryStroke | log_s_Streptococcus_peroris          | MR Egger                  | 18 | -0.0758 | 0.3108 | 0.8105 | 0.0160  | 0.0762 | 0.8362 | 8.9160  | 0.9168 | -2.7707  |
| LargeArteryStroke | log_s_Streptococcus_peroris          | Weighted median           | 18 | -0.0157 | 0.1363 | 0.9083 | 0.0160  | 0.0762 | 0.8362 | 8.9160  | 0.9168 | -2.7707  |
| LargeArteryStroke | log_s_Streptococcus_peroris          | Inverse variance weighted | 18 | -0.0141 | 0.1020 | 0.8903 | 0.0160  | 0.0762 | 0.8362 | 8.9160  | 0.9168 | -2.7707  |
| LargeArteryStroke | log_s_Streptococcus_peroris          | Simple mode               | 18 | 0.0618  | 0.2238 | 0.7856 | 0.0160  | 0.0762 | 0.8362 | 8.9160  | 0.9168 | -2.7707  |
| LargeArteryStroke | log_s_Streptococcus_peroris          | Weighted mode             | 18 | 0.0749  | 0.1991 | 0.7114 | 0.0160  | 0.0762 | 0.8362 | 8.9160  | 0.9168 | -2.7707  |
| LargeArteryStroke | log_s_Streptococcus_pseudopneumoniae | MR Egger                  | 18 | 0.6538  | 0.3116 | 0.0521 | -0.2081 | 0.0764 | 0.0150 | 20.4722 | 0.2508 | -0.9486  |
| LargeArteryStroke | log_s_Streptococcus_pseudopneumoniae | Weighted median           | 18 | -0.1145 | 0.1406 | 0.4154 | -0.2081 | 0.0764 | 0.0150 | 20.4722 | 0.2508 | -0.9486  |
| LargeArteryStroke | log_s_Streptococcus_pseudopneumoniae | Inverse variance weighted | 18 | -0.1478 | 0.1123 | 0.1881 | -0.2081 | 0.0764 | 0.0150 | 20.4722 | 0.2508 | -0.9486  |
| LargeArteryStroke | log_s_Streptococcus_pseudopneumoniae | Simple mode               | 18 | 0.0272  | 0.2516 | 0.9150 | -0.2081 | 0.0764 | 0.0150 | 20.4722 | 0.2508 | -0.9486  |
| LargeArteryStroke | log_s_Streptococcus_pseudopneumoniae | Weighted mode             | 18 | 0.0272  | 0.2328 | 0.9082 | -0.2081 | 0.0764 | 0.0150 | 20.4722 | 0.2508 | -0.9486  |
| LargeArteryStroke | log_s_Succinatimonas_hippei          | MR Egger                  | 18 | 0.0116  | 0.3119 | 0.9709 | -0.0047 | 0.0764 | 0.9514 | 15.1931 | 0.5105 | -5.7034  |
| LargeArteryStroke | log_s_Succinatimonas_hippei          | Weighted median           | 18 | 0.0402  | 0.1377 | 0.7701 | -0.0047 | 0.0764 | 0.9514 | 15.1931 | 0.5105 | -5.7034  |
| LargeArteryStroke | log_s_Succinatimonas_hippei          | Inverse variance weighted | 18 | -0.0067 | 0.1021 | 0.9478 | -0.0047 | 0.0764 | 0.9514 | 15.1931 | 0.5105 | -5.7034  |
| LargeArteryStroke | log_s_Succinatimonas_hippei          | Simple mode               | 18 | 0.0963  | 0.2326 | 0.6841 | -0.0047 | 0.0764 | 0.9514 | 15.1931 | 0.5105 | -5.7034  |
| LargeArteryStroke | log_s_Succinatimonas_hippei          | Weighted mode             | 18 | 0.1200  | 0.2243 | 0.5996 | -0.0047 | 0.0764 | 0.9514 | 15.1931 | 0.5105 | -5.7034  |
| LargeArteryStroke | log_s_Turicibacter_sanguinis         | MR Egger                  | 18 | 0.6079  | 0.3196 | 0.0753 | -0.1456 | 0.0783 | 0.0816 | 20.6462 | 0.2425 | -8.2606  |
| LargeArteryStroke | log_s_Turicibacter_sanguinis         | Weighted median           | 18 | 0.1574  | 0.1411 | 0.2646 | -0.1456 | 0.0783 | 0.0816 | 20.6462 | 0.2425 | -8.2606  |
| LargeArteryStroke | log_s_Turicibacter_sanguinis         | Inverse variance weighted | 18 | 0.0469  | 0.1123 | 0.6763 | -0.1456 | 0.0783 | 0.0816 | 20.6462 | 0.2425 | -8.2606  |
| LargeArteryStroke | log_s_Turicibacter_sanguinis         | Simple mode               | 18 | 0.1624  | 0.2580 | 0.5374 | -0.1456 | 0.0783 | 0.0816 | 20.6462 | 0.2425 | -8.2606  |
| LargeArteryStroke | log_s_Turicibacter_sanguinis         | Weighted mode             | 18 | 0.1771  | 0.2456 | 0.4808 | -0.1456 | 0.0783 | 0.0816 | 20.6462 | 0.2425 | -8.2606  |

|                   |                                         |                           |    |         |        |        |         |        |        |         |        |           |
|-------------------|-----------------------------------------|---------------------------|----|---------|--------|--------|---------|--------|--------|---------|--------|-----------|
| LargeArteryStroke | log_s_Vibrio_cholerae                   | MR Egger                  | 18 | 0.5641  | 0.3287 | 0.1054 | -0.1514 | 0.0806 | 0.0786 | 21.9138 | 0.1881 | -2.6200   |
| LargeArteryStroke | log_s_Vibrio_cholerae                   | Weighted median           | 18 | -0.0547 | 0.1450 | 0.7063 | -0.1514 | 0.0806 | 0.0786 | 21.9138 | 0.1881 | -2.6200   |
| LargeArteryStroke | log_s_Vibrio_cholerae                   | Inverse variance weighted | 18 | -0.0193 | 0.1157 | 0.8676 | -0.1514 | 0.0806 | 0.0786 | 21.9138 | 0.1881 | -2.6200   |
| LargeArteryStroke | log_s_Vibrio_cholerae                   | Simple mode               | 18 | -0.0502 | 0.2597 | 0.8490 | -0.1514 | 0.0806 | 0.0786 | 21.9138 | 0.1881 | -2.6200   |
| LargeArteryStroke | log_s_Vibrio_cholerae                   | Weighted mode             | 18 | -0.0748 | 0.2470 | 0.7658 | -0.1514 | 0.0806 | 0.0786 | 21.9138 | 0.1881 | -2.6200   |
| LargeArteryStroke | log_s_Vibrio_furnissii                  | MR Egger                  | 18 | 0.1647  | 0.3596 | 0.6532 | -0.0406 | 0.0880 | 0.6509 | 21.3374 | 0.1659 | -0.8867   |
| LargeArteryStroke | log_s_Vibrio_furnissii                  | Weighted median           | 18 | -0.1999 | 0.1490 | 0.1799 | -0.0406 | 0.0880 | 0.6509 | 21.3374 | 0.1659 | -0.8867   |
| LargeArteryStroke | log_s_Vibrio_furnissii                  | Inverse variance weighted | 18 | 0.0080  | 0.1151 | 0.9448 | -0.0406 | 0.0880 | 0.6509 | 21.3374 | 0.1659 | -0.8867   |
| LargeArteryStroke | log_s_Vibrio_furnissii                  | Simple mode               | 18 | -0.2900 | 0.2437 | 0.2505 | -0.0406 | 0.0880 | 0.6509 | 21.3374 | 0.1659 | -0.8867   |
| LargeArteryStroke | log_s_Vibrio_furnissii                  | Weighted mode             | 18 | -0.2693 | 0.2779 | 0.3462 | -0.0406 | 0.0880 | 0.6509 | 21.3374 | 0.1659 | -0.8867   |
| LargeArteryStroke | log_s_unclassified_Streptococcus_oralis | MR Egger                  | 18 | 0.2360  | 0.3119 | 0.4603 | -0.1127 | 0.0764 | 0.1597 | 16.8640 | 0.4636 | -4.3982   |
| LargeArteryStroke | log_s_unclassified_Streptococcus_oralis | Weighted median           | 18 | -0.1859 | 0.1408 | 0.1867 | -0.1127 | 0.0764 | 0.1597 | 16.8640 | 0.4636 | -4.3982   |
| LargeArteryStroke | log_s_unclassified_Streptococcus_oralis | Inverse variance weighted | 18 | -0.1986 | 0.1023 | 0.0522 | -0.1127 | 0.0764 | 0.1597 | 16.8640 | 0.4636 | -4.3982   |
| LargeArteryStroke | log_s_unclassified_Streptococcus_oralis | Simple mode               | 18 | -0.2528 | 0.2326 | 0.2924 | -0.1127 | 0.0764 | 0.1597 | 16.8640 | 0.4636 | -4.3982   |
| LargeArteryStroke | log_s_unclassified_Streptococcus_oralis | Weighted mode             | 18 | -0.2528 | 0.2283 | 0.2835 | -0.1127 | 0.0764 | 0.1597 | 16.8640 | 0.4636 | -4.3982   |
| LargeArteryStroke | o_Actinomycetales                       | MR Egger                  | 18 | 0.2466  | 0.1203 | 0.0572 | -0.0504 | 0.0295 | 0.1070 | 15.7640 | 0.5406 | -44.6227  |
| LargeArteryStroke | o_Actinomycetales                       | Weighted median           | 18 | 0.0877  | 0.0536 | 0.1017 | -0.0504 | 0.0295 | 0.1070 | 15.7640 | 0.5406 | -44.6227  |
| LargeArteryStroke | o_Actinomycetales                       | Inverse variance weighted | 18 | 0.0525  | 0.0395 | 0.1843 | -0.0504 | 0.0295 | 0.1070 | 15.7640 | 0.5406 | -44.6227  |
| LargeArteryStroke | o_Actinomycetales                       | Simple mode               | 18 | 0.1367  | 0.0922 | 0.1564 | -0.0504 | 0.0295 | 0.1070 | 15.7640 | 0.5406 | -44.6227  |
| LargeArteryStroke | o_Actinomycetales                       | Weighted mode             | 18 | 0.1303  | 0.0958 | 0.1916 | -0.0504 | 0.0295 | 0.1070 | 15.7640 | 0.5406 | -44.6227  |
| LargeArteryStroke | o_Bacillales                            | MR Egger                  | 18 | 0.0541  | 0.1189 | 0.6548 | -0.0164 | 0.0291 | 0.5816 | 10.6023 | 0.8333 | -135.1338 |
| LargeArteryStroke | o_Bacillales                            | Weighted median           | 18 | -0.0192 | 0.0533 | 0.7180 | -0.0164 | 0.0291 | 0.5816 | 10.6023 | 0.8333 | -135.1338 |
| LargeArteryStroke | o_Bacillales                            | Inverse variance weighted | 18 | -0.0090 | 0.0390 | 0.8176 | -0.0164 | 0.0291 | 0.5816 | 10.6023 | 0.8333 | -135.1338 |
| LargeArteryStroke | o_Bacillales                            | Simple mode               | 18 | -0.0972 | 0.0954 | 0.3223 | -0.0164 | 0.0291 | 0.5816 | 10.6023 | 0.8333 | -135.1338 |
| LargeArteryStroke | o_Bacillales                            | Weighted mode             | 18 | -0.0524 | 0.0921 | 0.5769 | -0.0164 | 0.0291 | 0.5816 | 10.6023 | 0.8333 | -135.1338 |
| LargeArteryStroke | o_Campylobacteriales                    | MR Egger                  | 18 | 0.0019  | 0.1725 | 0.9912 | -0.0010 | 0.0423 | 0.9820 | 14.0609 | 0.5942 | -54.9464  |
| LargeArteryStroke | o_Campylobacteriales                    | Weighted median           | 18 | -0.0022 | 0.0786 | 0.9781 | -0.0010 | 0.0423 | 0.9820 | 14.0609 | 0.5942 | -54.9464  |
| LargeArteryStroke | o_Campylobacteriales                    | Inverse variance weighted | 18 | -0.0018 | 0.0567 | 0.9746 | -0.0010 | 0.0423 | 0.9820 | 14.0609 | 0.5942 | -54.9464  |
| LargeArteryStroke | o_Campylobacteriales                    | Simple mode               | 18 | -0.0190 | 0.1482 | 0.8997 | -0.0010 | 0.0423 | 0.9820 | 14.0609 | 0.5942 | -54.9464  |
| LargeArteryStroke | o_Campylobacteriales                    | Weighted mode             | 18 | 0.0535  | 0.1299 | 0.6856 | -0.0010 | 0.0423 | 0.9820 | 14.0609 | 0.5942 | -54.9464  |
| LargeArteryStroke | o_Clostridiales                         | MR Egger                  | 18 | 0.1684  | 0.0963 | 0.0994 | -0.0386 | 0.0236 | 0.1214 | 10.9860 | 0.8573 | -182.8545 |
| LargeArteryStroke | o_Clostridiales                         | Weighted median           | 18 | 0.0616  | 0.0426 | 0.1476 | -0.0386 | 0.0236 | 0.1214 | 10.9860 | 0.8573 | -182.8545 |
| LargeArteryStroke | o_Clostridiales                         | Inverse variance weighted | 18 | 0.0196  | 0.0316 | 0.5345 | -0.0386 | 0.0236 | 0.1214 | 10.9860 | 0.8573 | -182.8545 |
| LargeArteryStroke | o_Clostridiales                         | Simple mode               | 18 | 0.0711  | 0.0738 | 0.3491 | -0.0386 | 0.0236 | 0.1214 | 10.9860 | 0.8573 | -182.8545 |
| LargeArteryStroke | o_Clostridiales                         | Weighted mode             | 18 | 0.0675  | 0.0722 | 0.3626 | -0.0386 | 0.0236 | 0.1214 | 10.9860 | 0.8573 | -182.8545 |
| LargeArteryStroke | o_Erysipelotrichales                    | MR Egger                  | 18 | 0.0833  | 0.1193 | 0.4949 | -0.0101 | 0.0293 | 0.7352 | 17.2283 | 0.3710 | -138.1398 |
| LargeArteryStroke | o_Erysipelotrichales                    | Weighted median           | 18 | 0.0601  | 0.0532 | 0.2588 | -0.0101 | 0.0293 | 0.7352 | 17.2283 | 0.3710 | -138.1398 |
| LargeArteryStroke | o_Erysipelotrichales                    | Inverse variance weighted | 18 | 0.0445  | 0.0381 | 0.2429 | -0.0101 | 0.0293 | 0.7352 | 17.2283 | 0.3710 | -138.1398 |
| LargeArteryStroke | o_Erysipelotrichales                    | Simple mode               | 18 | 0.1195  | 0.0935 | 0.2185 | -0.0101 | 0.0293 | 0.7352 | 17.2283 | 0.3710 | -138.1398 |
| LargeArteryStroke | o_Erysipelotrichales                    | Weighted mode             | 18 | 0.0859  | 0.0884 | 0.3452 | -0.0101 | 0.0293 | 0.7352 | 17.2283 | 0.3710 | -138.1398 |
| LargeArteryStroke | o_Pasteurellales                        | MR Egger                  | 18 | -0.1415 | 0.2819 | 0.6226 | 0.0136  | 0.0691 | 0.8464 | 13.6272 | 0.6265 | -8.2416   |
| LargeArteryStroke | o_Pasteurellales                        | Weighted median           | 18 | 0.0158  | 0.1271 | 0.9011 | 0.0136  | 0.0691 | 0.8464 | 13.6272 | 0.6265 | -8.2416   |
| LargeArteryStroke | o_Pasteurellales                        | Inverse variance weighted | 18 | -0.0891 | 0.0926 | 0.3360 | 0.0136  | 0.0691 | 0.8464 | 13.6272 | 0.6265 | -8.2416   |
| LargeArteryStroke | o_Pasteurellales                        | Simple mode               | 18 | 0.0549  | 0.2044 | 0.7915 | 0.0136  | 0.0691 | 0.8464 | 13.6272 | 0.6265 | -8.2416   |
| LargeArteryStroke | o_Pasteurellales                        | Weighted mode             | 18 | 0.0361  | 0.1992 | 0.8583 | 0.0136  | 0.0691 | 0.8464 | 13.6272 | 0.6265 | -8.2416   |
| LargeArteryStroke | o_Pseudomonadales                       | MR Egger                  | 18 | 0.5194  | 0.4823 | 0.2975 | -0.1191 | 0.1183 | 0.3291 | 35.7923 | 0.0049 | -0.6303   |
| LargeArteryStroke | o_Pseudomonadales                       | Weighted median           | 18 | 0.1150  | 0.1615 | 0.4765 | -0.1191 | 0.1183 | 0.3291 | 35.7923 | 0.0049 | -0.6303   |
| LargeArteryStroke | o_Pseudomonadales                       | Inverse variance weighted | 18 | 0.0608  | 0.1584 | 0.7010 | -0.1191 | 0.1183 | 0.3291 | 35.7923 | 0.0049 | -0.6303   |
| LargeArteryStroke | o_Pseudomonadales                       | Simple mode               | 18 | 0.0926  | 0.2792 | 0.7442 | -0.1191 | 0.1183 | 0.3291 | 35.7923 | 0.0049 | -0.6303   |
| LargeArteryStroke | o_Pseudomonadales                       | Weighted mode             | 18 | 0.0926  | 0.2695 | 0.7354 | -0.1191 | 0.1183 | 0.3291 | 35.7923 | 0.0049 | -0.6303   |
| LargeArteryStroke | o_Spirochaetales                        | MR Egger                  | 18 | -0.0715 | 0.2291 | 0.7589 | 0.0285  | 0.0562 | 0.6186 | 31.1310 | 0.0129 | -14.9061  |
| LargeArteryStroke | o_Spirochaetales                        | Weighted median           | 18 | 0.0832  | 0.0803 | 0.2999 | 0.0285  | 0.0562 | 0.6186 | 31.1310 | 0.0129 | -14.9061  |
| LargeArteryStroke | o_Spirochaetales                        | Inverse variance weighted | 18 | 0.0383  | 0.0736 | 0.6024 | 0.0285  | 0.0562 | 0.6186 | 31.1310 | 0.0129 | -14.9061  |
| LargeArteryStroke | o_Spirochaetales                        | Simple mode               | 18 | 0.0735  | 0.1384 | 0.6022 | 0.0285  | 0.0562 | 0.6186 | 31.1310 | 0.0129 | -14.9061  |
| LargeArteryStroke | o_Spirochaetales                        | Weighted mode             | 18 | 0.0681  | 0.1310 | 0.6099 | 0.0285  | 0.0562 | 0.6186 | 31.1310 | 0.0129 | -14.9061  |
| LargeArteryStroke | p_Lentisphaerae                         | MR Egger                  | 18 | -0.1484 | 0.4598 | 0.7511 | 0.0425  | 0.1128 | 0.7112 | 20.0543 | 0.2178 | -1.9440   |
| LargeArteryStroke | p_Lentisphaerae                         | Weighted median           | 18 | 0.1417  | 0.1984 | 0.4752 | 0.0425  | 0.1128 | 0.7112 | 20.0543 | 0.2178 | -1.9440   |
| LargeArteryStroke | p_Lentisphaerae                         | Inverse variance weighted | 18 | 0.0153  | 0.1471 | 0.9170 | 0.0425  | 0.1128 | 0.7112 | 20.0543 | 0.2178 | -1.9440   |
| LargeArteryStroke | p_Lentisphaerae                         | Simple mode               | 18 | 0.3286  | 0.3618 | 0.3765 | 0.0425  | 0.1128 | 0.7112 | 20.0543 | 0.2178 | -1.9440   |
| LargeArteryStroke | p_Lentisphaerae                         | Weighted mode             | 18 | 0.2952  | 0.3103 | 0.3548 | 0.0425  | 0.1128 | 0.7112 | 20.0543 | 0.2178 | -1.9440   |
| LargeArteryStroke | p_Proteobacteria                        | MR Egger                  | 18 | 0.1701  | 0.1702 | 0.3325 | -0.0370 | 0.0417 | 0.3880 | 20.6623 | 0.1919 | -47.8963  |

|                   |                              |                           |    |         |        |        |         |        |        |         |        |          |
|-------------------|------------------------------|---------------------------|----|---------|--------|--------|---------|--------|--------|---------|--------|----------|
| LargeArteryStroke | p_Proteobacteria             | Weighted median           | 18 | 0.0306  | 0.0722 | 0.6713 | -0.0370 | 0.0417 | 0.3880 | 20.6623 | 0.1919 | -47.8963 |
| LargeArteryStroke | p_Proteobacteria             | Inverse variance weighted | 18 | 0.0274  | 0.0555 | 0.6213 | -0.0370 | 0.0417 | 0.3880 | 20.6623 | 0.1919 | -47.8963 |
| LargeArteryStroke | p_Proteobacteria             | Simple mode               | 18 | -0.0027 | 0.1232 | 0.9831 | -0.0370 | 0.0417 | 0.3880 | 20.6623 | 0.1919 | -47.8963 |
| LargeArteryStroke | p_Proteobacteria             | Weighted mode             | 18 | 0.0241  | 0.1180 | 0.8408 | -0.0370 | 0.0417 | 0.3880 | 20.6623 | 0.1919 | -47.8963 |
| LargeArteryStroke | p_Synergistetes              | MR Egger                  | 18 | -0.0178 | 0.4520 | 0.9690 | 0.0209  | 0.1109 | 0.8530 | 22.8805 | 0.1170 | -4.4535  |
| LargeArteryStroke | p_Synergistetes              | Weighted median           | 18 | 0.0217  | 0.1737 | 0.9006 | 0.0209  | 0.1109 | 0.8530 | 22.8805 | 0.1170 | -4.4535  |
| LargeArteryStroke | p_Synergistetes              | Inverse variance weighted | 18 | 0.0626  | 0.1442 | 0.6643 | 0.0209  | 0.1109 | 0.8530 | 22.8805 | 0.1170 | -4.4535  |
| LargeArteryStroke | p_Synergistetes              | Simple mode               | 18 | -0.0964 | 0.2946 | 0.7476 | 0.0209  | 0.1109 | 0.8530 | 22.8805 | 0.1170 | -4.4535  |
| LargeArteryStroke | p_Synergistetes              | Weighted mode             | 18 | -0.0756 | 0.3099 | 0.8103 | 0.0209  | 0.1109 | 0.8530 | 22.8805 | 0.1170 | -4.4535  |
| LargeArteryStroke | p_Verrucomicrobia            | MR Egger                  | 18 | 0.4177  | 0.5695 | 0.4739 | -0.0645 | 0.1397 | 0.6504 | 21.5894 | 0.1570 | -0.2549  |
| LargeArteryStroke | p_Verrucomicrobia            | Weighted median           | 18 | 0.2502  | 0.2360 | 0.2889 | -0.0645 | 0.1397 | 0.6504 | 21.5894 | 0.1570 | -0.2549  |
| LargeArteryStroke | p_Verrucomicrobia            | Inverse variance weighted | 18 | 0.1693  | 0.1826 | 0.3540 | -0.0645 | 0.1397 | 0.6504 | 21.5894 | 0.1570 | -0.2549  |
| LargeArteryStroke | p_Verrucomicrobia            | Simple mode               | 18 | 0.8546  | 0.4527 | 0.0763 | -0.0645 | 0.1397 | 0.6504 | 21.5894 | 0.1570 | -0.2549  |
| LargeArteryStroke | p_Verrucomicrobia            | Weighted mode             | 18 | 0.2067  | 0.4192 | 0.6282 | -0.0645 | 0.1397 | 0.6504 | 21.5894 | 0.1570 | -0.2549  |
| LargeArteryStroke | s_Acidaminococcus_fermentans | MR Egger                  | 18 | -0.0592 | 0.2980 | 0.8451 | 0.0414  | 0.0731 | 0.5793 | 26.4239 | 0.0483 | -13.1184 |
| LargeArteryStroke | s_Acidaminococcus_fermentans | Weighted median           | 18 | 0.1424  | 0.1149 | 0.2153 | 0.0414  | 0.0731 | 0.5793 | 26.4239 | 0.0483 | -13.1184 |
| LargeArteryStroke | s_Acidaminococcus_fermentans | Inverse variance weighted | 18 | 0.1001  | 0.0959 | 0.2963 | 0.0414  | 0.0731 | 0.5793 | 26.4239 | 0.0483 | -13.1184 |
| LargeArteryStroke | s_Acidaminococcus_fermentans | Simple mode               | 18 | 0.2603  | 0.2197 | 0.2524 | 0.0414  | 0.0731 | 0.5793 | 26.4239 | 0.0483 | -13.1184 |
| LargeArteryStroke | s_Acidaminococcus_fermentans | Weighted mode             | 18 | 0.1949  | 0.1799 | 0.2939 | 0.0414  | 0.0731 | 0.5793 | 26.4239 | 0.0483 | -13.1184 |
| LargeArteryStroke | s_Actinomyces_odontolyticus  | MR Egger                  | 18 | 0.3565  | 0.2040 | 0.0997 | -0.0898 | 0.0500 | 0.0914 | 14.0202 | 0.6657 | -26.9653 |
| LargeArteryStroke | s_Actinomyces_odontolyticus  | Weighted median           | 18 | 0.0396  | 0.0869 | 0.6489 | -0.0898 | 0.0500 | 0.0914 | 14.0202 | 0.6657 | -26.9653 |
| LargeArteryStroke | s_Actinomyces_odontolyticus  | Inverse variance weighted | 18 | 0.0105  | 0.0670 | 0.8759 | -0.0898 | 0.0500 | 0.0914 | 14.0202 | 0.6657 | -26.9653 |
| LargeArteryStroke | s_Actinomyces_odontolyticus  | Simple mode               | 18 | 0.1240  | 0.1415 | 0.3930 | -0.0898 | 0.0500 | 0.0914 | 14.0202 | 0.6657 | -26.9653 |
| LargeArteryStroke | s_Actinomyces_odontolyticus  | Weighted mode             | 18 | 0.1164  | 0.1499 | 0.4481 | -0.0898 | 0.0500 | 0.0914 | 14.0202 | 0.6657 | -26.9653 |
| LargeArteryStroke | s_Actinomyces_viscosus       | MR Egger                  | 18 | 0.2127  | 0.1815 | 0.2582 | -0.0585 | 0.0445 | 0.2075 | 11.7108 | 0.8173 | -85.2547 |
| LargeArteryStroke | s_Actinomyces_viscosus       | Weighted median           | 18 | 0.0352  | 0.0816 | 0.6664 | -0.0585 | 0.0445 | 0.2075 | 11.7108 | 0.8173 | -85.2547 |
| LargeArteryStroke | s_Actinomyces_viscosus       | Inverse variance weighted | 18 | -0.0124 | 0.0596 | 0.8347 | -0.0585 | 0.0445 | 0.2075 | 11.7108 | 0.8173 | -85.2547 |
| LargeArteryStroke | s_Actinomyces_viscosus       | Simple mode               | 18 | 0.0631  | 0.1445 | 0.6678 | -0.0585 | 0.0445 | 0.2075 | 11.7108 | 0.8173 | -85.2547 |
| LargeArteryStroke | s_Actinomyces_viscosus       | Weighted mode             | 18 | 0.0544  | 0.1405 | 0.7032 | -0.0585 | 0.0445 | 0.2075 | 11.7108 | 0.8173 | -85.2547 |
| LargeArteryStroke | s_Akkermansia_muciniphila    | MR Egger                  | 18 | 0.4174  | 0.5456 | 0.4555 | -0.0524 | 0.1338 | 0.7005 | 17.9358 | 0.3277 | -0.2501  |
| LargeArteryStroke | s_Akkermansia_muciniphila    | Weighted median           | 18 | 0.3253  | 0.2538 | 0.2001 | -0.0524 | 0.1338 | 0.7005 | 17.9358 | 0.3277 | -0.2501  |
| LargeArteryStroke | s_Akkermansia_muciniphila    | Inverse variance weighted | 18 | 0.2155  | 0.1747 | 0.2172 | -0.0524 | 0.1338 | 0.7005 | 17.9358 | 0.3277 | -0.2501  |
| LargeArteryStroke | s_Akkermansia_muciniphila    | Simple mode               | 18 | 0.3668  | 0.4196 | 0.3942 | -0.0524 | 0.1338 | 0.7005 | 17.9358 | 0.3277 | -0.2501  |
| LargeArteryStroke | s_Akkermansia_muciniphila    | Weighted mode             | 18 | 0.3307  | 0.4198 | 0.4416 | -0.0524 | 0.1338 | 0.7005 | 17.9358 | 0.3277 | -0.2501  |
| LargeArteryStroke | s_Alistipes_shahii           | MR Egger                  | 18 | -0.2810 | 0.2521 | 0.2815 | 0.0902  | 0.0618 | 0.1637 | 16.3372 | 0.5001 | -28.3015 |
| LargeArteryStroke | s_Alistipes_shahii           | Weighted median           | 18 | -0.0111 | 0.1177 | 0.9248 | 0.0902  | 0.0618 | 0.1637 | 16.3372 | 0.5001 | -28.3015 |
| LargeArteryStroke | s_Alistipes_shahii           | Inverse variance weighted | 18 | 0.0666  | 0.0828 | 0.4210 | 0.0902  | 0.0618 | 0.1637 | 16.3372 | 0.5001 | -28.3015 |
| LargeArteryStroke | s_Alistipes_shahii           | Simple mode               | 18 | -0.0490 | 0.2013 | 0.8105 | 0.0902  | 0.0618 | 0.1637 | 16.3372 | 0.5001 | -28.3015 |
| LargeArteryStroke | s_Alistipes_shahii           | Weighted mode             | 18 | -0.1048 | 0.1957 | 0.5992 | 0.0902  | 0.0618 | 0.1637 | 16.3372 | 0.5001 | -28.3015 |
| LargeArteryStroke | s_Bacteroides_caccae         | MR Egger                  | 18 | -0.0828 | 0.2650 | 0.7586 | -0.0051 | 0.0650 | 0.9388 | 13.1187 | 0.6641 | -30.9902 |
| LargeArteryStroke | s_Bacteroides_caccae         | Weighted median           | 18 | -0.1123 | 0.1206 | 0.3517 | -0.0051 | 0.0650 | 0.9388 | 13.1187 | 0.6641 | -30.9902 |
| LargeArteryStroke | s_Bacteroides_caccae         | Inverse variance weighted | 18 | -0.1024 | 0.0870 | 0.2395 | -0.0051 | 0.0650 | 0.9388 | 13.1187 | 0.6641 | -30.9902 |
| LargeArteryStroke | s_Bacteroides_caccae         | Simple mode               | 18 | -0.1038 | 0.2271 | 0.6535 | -0.0051 | 0.0650 | 0.9388 | 13.1187 | 0.6641 | -30.9902 |
| LargeArteryStroke | s_Bacteroides_caccae         | Weighted mode             | 18 | -0.0341 | 0.2033 | 0.8687 | -0.0051 | 0.0650 | 0.9388 | 13.1187 | 0.6641 | -30.9902 |
| LargeArteryStroke | s_Bacteroides_clarus         | MR Egger                  | 18 | -0.0996 | 0.2589 | 0.7055 | 0.0245  | 0.0635 | 0.7051 | 18.3365 | 0.3046 | -23.4444 |
| LargeArteryStroke | s_Bacteroides_clarus         | Weighted median           | 18 | 0.0680  | 0.1110 | 0.5401 | 0.0245  | 0.0635 | 0.7051 | 18.3365 | 0.3046 | -23.4444 |
| LargeArteryStroke | s_Bacteroides_clarus         | Inverse variance weighted | 18 | -0.0054 | 0.0829 | 0.9480 | 0.0245  | 0.0635 | 0.7051 | 18.3365 | 0.3046 | -23.4444 |
| LargeArteryStroke | s_Bacteroides_clarus         | Simple mode               | 18 | 0.1065  | 0.1800 | 0.5618 | 0.0245  | 0.0635 | 0.7051 | 18.3365 | 0.3046 | -23.4444 |
| LargeArteryStroke | s_Bacteroides_clarus         | Weighted mode             | 18 | 0.1105  | 0.1722 | 0.5297 | 0.0245  | 0.0635 | 0.7051 | 18.3365 | 0.3046 | -23.4444 |
| LargeArteryStroke | s_Bacteroides_coprocola      | MR Egger                  | 18 | -0.3650 | 0.3370 | 0.2948 | 0.0902  | 0.0827 | 0.2914 | 24.5469 | 0.1053 | -9.3068  |
| LargeArteryStroke | s_Bacteroides_coprocola      | Weighted median           | 18 | 0.0032  | 0.1383 | 0.9814 | 0.0902  | 0.0827 | 0.2914 | 24.5469 | 0.1053 | -9.3068  |
| LargeArteryStroke | s_Bacteroides_coprocola      | Inverse variance weighted | 18 | -0.0177 | 0.1113 | 0.8737 | 0.0902  | 0.0827 | 0.2914 | 24.5469 | 0.1053 | -9.3068  |
| LargeArteryStroke | s_Bacteroides_coprocola      | Simple mode               | 18 | 0.0327  | 0.2961 | 0.9134 | 0.0902  | 0.0827 | 0.2914 | 24.5469 | 0.1053 | -9.3068  |
| LargeArteryStroke | s_Bacteroides_coprocola      | Weighted mode             | 18 | 0.0267  | 0.2682 | 0.9217 | 0.0902  | 0.0827 | 0.2914 | 24.5469 | 0.1053 | -9.3068  |
| LargeArteryStroke | s_Bacteroides_coprophilus    | MR Egger                  | 18 | 0.0289  | 0.2497 | 0.9093 | -0.0008 | 0.0612 | 0.9897 | 23.1643 | 0.1094 | -29.1385 |
| LargeArteryStroke | s_Bacteroides_coprophilus    | Weighted median           | 18 | -0.0334 | 0.0991 | 0.7357 | -0.0008 | 0.0612 | 0.9897 | 23.1643 | 0.1094 | -29.1385 |
| LargeArteryStroke | s_Bacteroides_coprophilus    | Inverse variance weighted | 18 | 0.0258  | 0.0795 | 0.7455 | -0.0008 | 0.0612 | 0.9897 | 23.1643 | 0.1094 | -29.1385 |
| LargeArteryStroke | s_Bacteroides_coprophilus    | Simple mode               | 18 | -0.1173 | 0.1893 | 0.5438 | -0.0008 | 0.0612 | 0.9897 | 23.1643 | 0.1094 | -29.1385 |
| LargeArteryStroke | s_Bacteroides_coprophilus    | Weighted mode             | 18 | -0.1026 | 0.1740 | 0.5632 | -0.0008 | 0.0612 | 0.9897 | 23.1643 | 0.1094 | -29.1385 |
| LargeArteryStroke | s_Bacteroides_dorei          | MR Egger                  | 18 | -0.1030 | 0.1909 | 0.5969 | 0.0357  | 0.0468 | 0.4563 | 18.1373 | 0.3159 | -70.9354 |
| LargeArteryStroke | s_Bacteroides_dorei          | Weighted median           | 18 | 0.0086  | 0.0864 | 0.9211 | 0.0357  | 0.0468 | 0.4563 | 18.1373 | 0.3159 | -70.9354 |

|                   |                                |                           |    |         |        |        |         |        |        |         |        |          |
|-------------------|--------------------------------|---------------------------|----|---------|--------|--------|---------|--------|--------|---------|--------|----------|
| LargeArteryStroke | s_Bacteroides_dorei            | Inverse variance weighted | 18 | 0.0347  | 0.0619 | 0.5756 | 0.0357  | 0.0468 | 0.4563 | 18.1373 | 0.3159 | -70.9354 |
| LargeArteryStroke | s_Bacteroides_dorei            | Simple mode               | 18 | -0.0686 | 0.1737 | 0.6977 | 0.0357  | 0.0468 | 0.4563 | 18.1373 | 0.3159 | -70.9354 |
| LargeArteryStroke | s_Bacteroides_dorei            | Weighted mode             | 18 | -0.1079 | 0.1687 | 0.5311 | 0.0357  | 0.0468 | 0.4563 | 18.1373 | 0.3159 | -70.9354 |
| LargeArteryStroke | s_Bacteroides_eggerthii        | MR Egger                  | 18 | 0.0187  | 0.2129 | 0.9313 | -0.0100 | 0.0522 | 0.8505 | 14.0656 | 0.5938 | -45.7656 |
| LargeArteryStroke | s_Bacteroides_eggerthii        | Weighted median           | 18 | -0.0213 | 0.0979 | 0.8278 | -0.0100 | 0.0522 | 0.8505 | 14.0656 | 0.5938 | -45.7656 |
| LargeArteryStroke | s_Bacteroides_eggerthii        | Inverse variance weighted | 18 | -0.0199 | 0.0699 | 0.7764 | -0.0100 | 0.0522 | 0.8505 | 14.0656 | 0.5938 | -45.7656 |
| LargeArteryStroke | s_Bacteroides_eggerthii        | Simple mode               | 18 | -0.0312 | 0.1779 | 0.8629 | -0.0100 | 0.0522 | 0.8505 | 14.0656 | 0.5938 | -45.7656 |
| LargeArteryStroke | s_Bacteroides_eggerthii        | Weighted mode             | 18 | -0.0235 | 0.1692 | 0.8912 | -0.0100 | 0.0522 | 0.8505 | 14.0656 | 0.5938 | -45.7656 |
| LargeArteryStroke | s_Bacteroides_finegoldii       | MR Egger                  | 18 | -0.1617 | 0.1893 | 0.4058 | 0.0675  | 0.0464 | 0.1651 | 17.4720 | 0.4229 | -17.1374 |
| LargeArteryStroke | s_Bacteroides_finegoldii       | Weighted median           | 18 | 0.0933  | 0.0882 | 0.2902 | 0.0675  | 0.0464 | 0.1651 | 17.4720 | 0.4229 | -17.1374 |
| LargeArteryStroke | s_Bacteroides_finegoldii       | Inverse variance weighted | 18 | 0.0984  | 0.0630 | 0.1183 | 0.0675  | 0.0464 | 0.1651 | 17.4720 | 0.4229 | -17.1374 |
| LargeArteryStroke | s_Bacteroides_finegoldii       | Simple mode               | 18 | 0.0708  | 0.1403 | 0.6202 | 0.0675  | 0.0464 | 0.1651 | 17.4720 | 0.4229 | -17.1374 |
| LargeArteryStroke | s_Bacteroides_finegoldii       | Weighted mode             | 18 | 0.0660  | 0.1324 | 0.6242 | 0.0675  | 0.0464 | 0.1651 | 17.4720 | 0.4229 | -17.1374 |
| LargeArteryStroke | s_Bacteroides_fluxus           | MR Egger                  | 18 | 0.0362  | 0.1900 | 0.8513 | 0.0083  | 0.0466 | 0.8616 | 16.2562 | 0.4352 | -65.4227 |
| LargeArteryStroke | s_Bacteroides_fluxus           | Weighted median           | 18 | 0.0892  | 0.0902 | 0.3230 | 0.0083  | 0.0466 | 0.8616 | 16.2562 | 0.4352 | -65.4227 |
| LargeArteryStroke | s_Bacteroides_fluxus           | Inverse variance weighted | 18 | 0.0680  | 0.0619 | 0.2718 | 0.0083  | 0.0466 | 0.8616 | 16.2562 | 0.4352 | -65.4227 |
| LargeArteryStroke | s_Bacteroides_fluxus           | Simple mode               | 18 | 0.0711  | 0.1702 | 0.6815 | 0.0083  | 0.0466 | 0.8616 | 16.2562 | 0.4352 | -65.4227 |
| LargeArteryStroke | s_Bacteroides_fluxus           | Weighted mode             | 18 | 0.1007  | 0.1518 | 0.5161 | 0.0083  | 0.0466 | 0.8616 | 16.2562 | 0.4352 | -65.4227 |
| LargeArteryStroke | s_Bacteroides_fragilis         | MR Egger                  | 18 | 0.2420  | 0.2201 | 0.2878 | -0.0562 | 0.0540 | 0.3135 | 16.0928 | 0.5173 | -35.2397 |
| LargeArteryStroke | s_Bacteroides_fragilis         | Weighted median           | 18 | -0.0089 | 0.0964 | 0.9264 | -0.0562 | 0.0540 | 0.3135 | 16.0928 | 0.5173 | -35.2397 |
| LargeArteryStroke | s_Bacteroides_fragilis         | Inverse variance weighted | 18 | 0.0257  | 0.0723 | 0.7225 | -0.0562 | 0.0540 | 0.3135 | 16.0928 | 0.5173 | -35.2397 |
| LargeArteryStroke | s_Bacteroides_fragilis         | Simple mode               | 18 | -0.1311 | 0.1753 | 0.4646 | -0.0562 | 0.0540 | 0.3135 | 16.0928 | 0.5173 | -35.2397 |
| LargeArteryStroke | s_Bacteroides_fragilis         | Weighted mode             | 18 | -0.0236 | 0.1597 | 0.8844 | -0.0562 | 0.0540 | 0.3135 | 16.0928 | 0.5173 | -35.2397 |
| LargeArteryStroke | s_Bacteroides_helcogenes       | MR Egger                  | 18 | -0.2528 | 0.2630 | 0.3508 | 0.0832  | 0.0645 | 0.2155 | 25.5223 | 0.0836 | -7.5093  |
| LargeArteryStroke | s_Bacteroides_helcogenes       | Weighted median           | 18 | 0.0491  | 0.0996 | 0.6221 | 0.0832  | 0.0645 | 0.2155 | 25.5223 | 0.0836 | -7.5093  |
| LargeArteryStroke | s_Bacteroides_helcogenes       | Inverse variance weighted | 18 | 0.0676  | 0.0881 | 0.4426 | 0.0832  | 0.0645 | 0.2155 | 25.5223 | 0.0836 | -7.5093  |
| LargeArteryStroke | s_Bacteroides_helcogenes       | Simple mode               | 18 | 0.0579  | 0.1660 | 0.7315 | 0.0832  | 0.0645 | 0.2155 | 25.5223 | 0.0836 | -7.5093  |
| LargeArteryStroke | s_Bacteroides_helcogenes       | Weighted mode             | 18 | 0.0420  | 0.1522 | 0.7858 | 0.0832  | 0.0645 | 0.2155 | 25.5223 | 0.0836 | -7.5093  |
| LargeArteryStroke | s_Bacteroides_intestinalis     | MR Egger                  | 18 | 0.0745  | 0.2289 | 0.7491 | -0.0168 | 0.0561 | 0.7688 | 14.4772 | 0.5632 | -29.8331 |
| LargeArteryStroke | s_Bacteroides_intestinalis     | Weighted median           | 18 | -0.0327 | 0.1085 | 0.7632 | -0.0168 | 0.0561 | 0.7688 | 14.4772 | 0.5632 | -29.8331 |
| LargeArteryStroke | s_Bacteroides_intestinalis     | Inverse variance weighted | 18 | 0.0098  | 0.0751 | 0.8960 | -0.0168 | 0.0561 | 0.7688 | 14.4772 | 0.5632 | -29.8331 |
| LargeArteryStroke | s_Bacteroides_intestinalis     | Simple mode               | 18 | -0.0673 | 0.1855 | 0.7212 | -0.0168 | 0.0561 | 0.7688 | 14.4772 | 0.5632 | -29.8331 |
| LargeArteryStroke | s_Bacteroides_intestinalis     | Weighted mode             | 18 | -0.0982 | 0.1648 | 0.5592 | -0.0168 | 0.0561 | 0.7688 | 14.4772 | 0.5632 | -29.8331 |
| LargeArteryStroke | s_Bacteroides_ovatus           | MR Egger                  | 18 | -0.1655 | 0.1395 | 0.2529 | 0.0321  | 0.0342 | 0.3616 | 12.5931 | 0.7630 | -98.1470 |
| LargeArteryStroke | s_Bacteroides_ovatus           | Weighted median           | 18 | -0.0413 | 0.0597 | 0.4894 | 0.0321  | 0.0342 | 0.3616 | 12.5931 | 0.7630 | -98.1470 |
| LargeArteryStroke | s_Bacteroides_ovatus           | Inverse variance weighted | 18 | -0.0417 | 0.0458 | 0.3625 | 0.0321  | 0.0342 | 0.3616 | 12.5931 | 0.7630 | -98.1470 |
| LargeArteryStroke | s_Bacteroides_ovatus           | Simple mode               | 18 | 0.0059  | 0.1086 | 0.9575 | 0.0321  | 0.0342 | 0.3616 | 12.5931 | 0.7630 | -98.1470 |
| LargeArteryStroke | s_Bacteroides_ovatus           | Weighted mode             | 18 | -0.0145 | 0.1005 | 0.8868 | 0.0321  | 0.0342 | 0.3616 | 12.5931 | 0.7630 | -98.1470 |
| LargeArteryStroke | s_Bacteroides_pectinophilus    | MR Egger                  | 18 | 0.0788  | 0.1399 | 0.5810 | -0.0194 | 0.0343 | 0.5803 | 8.6120  | 0.9285 | NA       |
| LargeArteryStroke | s_Bacteroides_pectinophilus    | Weighted median           | 18 | 0.0323  | 0.0604 | 0.5931 | -0.0194 | 0.0343 | 0.5803 | 8.6120  | 0.9285 | NA       |
| LargeArteryStroke | s_Bacteroides_pectinophilus    | Inverse variance weighted | 18 | 0.0042  | 0.0459 | 0.9266 | -0.0194 | 0.0343 | 0.5803 | 8.6120  | 0.9285 | NA       |
| LargeArteryStroke | s_Bacteroides_pectinophilus    | Simple mode               | 18 | 0.0512  | 0.0973 | 0.6057 | -0.0194 | 0.0343 | 0.5803 | 8.6120  | 0.9285 | NA       |
| LargeArteryStroke | s_Bacteroides_pectinophilus    | Weighted mode             | 18 | 0.0536  | 0.1004 | 0.6006 | -0.0194 | 0.0343 | 0.5803 | 8.6120  | 0.9285 | NA       |
| LargeArteryStroke | s_Bacteroides_plebeius         | MR Egger                  | 18 | -0.4229 | 0.3822 | 0.2849 | 0.1274  | 0.0937 | 0.1929 | 20.4509 | 0.2518 | -3.4420  |
| LargeArteryStroke | s_Bacteroides_plebeius         | Weighted median           | 18 | 0.0820  | 0.1679 | 0.6253 | 0.1274  | 0.0937 | 0.1929 | 20.4509 | 0.2518 | -3.4420  |
| LargeArteryStroke | s_Bacteroides_plebeius         | Inverse variance weighted | 18 | 0.0678  | 0.1286 | 0.5980 | 0.1274  | 0.0937 | 0.1929 | 20.4509 | 0.2518 | -3.4420  |
| LargeArteryStroke | s_Bacteroides_plebeius         | Simple mode               | 18 | 0.3668  | 0.3365 | 0.2910 | 0.1274  | 0.0937 | 0.1929 | 20.4509 | 0.2518 | -3.4420  |
| LargeArteryStroke | s_Bacteroides_plebeius         | Weighted mode             | 18 | 0.3219  | 0.3226 | 0.3324 | 0.1274  | 0.0937 | 0.1929 | 20.4509 | 0.2518 | -3.4420  |
| LargeArteryStroke | s_Bacteroides_salanitronis     | MR Egger                  | 18 | -0.2186 | 0.1745 | 0.2283 | 0.0555  | 0.0428 | 0.2130 | 23.8590 | 0.1233 | -59.3835 |
| LargeArteryStroke | s_Bacteroides_salanitronis     | Weighted median           | 18 | -0.0413 | 0.0705 | 0.5578 | 0.0555  | 0.0428 | 0.2130 | 23.8590 | 0.1233 | -59.3835 |
| LargeArteryStroke | s_Bacteroides_salanitronis     | Inverse variance weighted | 18 | -0.0048 | 0.0585 | 0.9344 | 0.0555  | 0.0428 | 0.2130 | 23.8590 | 0.1233 | -59.3835 |
| LargeArteryStroke | s_Bacteroides_salanitronis     | Simple mode               | 18 | -0.1336 | 0.1254 | 0.3019 | 0.0555  | 0.0428 | 0.2130 | 23.8590 | 0.1233 | -59.3835 |
| LargeArteryStroke | s_Bacteroides_salanitronis     | Weighted mode             | 18 | -0.0670 | 0.1232 | 0.5935 | 0.0555  | 0.0428 | 0.2130 | 23.8590 | 0.1233 | -59.3835 |
| LargeArteryStroke | s_Bacteroides_stercoris        | MR Egger                  | 18 | -0.5655 | 0.3424 | 0.1181 | 0.1384  | 0.0840 | 0.1189 | 24.9035 | 0.0969 | -0.9325  |
| LargeArteryStroke | s_Bacteroides_stercoris        | Weighted median           | 18 | -0.1760 | 0.1432 | 0.2192 | 0.1384  | 0.0840 | 0.1189 | 24.9035 | 0.0969 | -0.9325  |
| LargeArteryStroke | s_Bacteroides_stercoris        | Inverse variance weighted | 18 | -0.0326 | 0.1180 | 0.7826 | 0.1384  | 0.0840 | 0.1189 | 24.9035 | 0.0969 | -0.9325  |
| LargeArteryStroke | s_Bacteroides_stercoris        | Simple mode               | 18 | -0.2188 | 0.2347 | 0.3642 | 0.1384  | 0.0840 | 0.1189 | 24.9035 | 0.0969 | -0.9325  |
| LargeArteryStroke | s_Bacteroides_stercoris        | Weighted mode             | 18 | -0.2188 | 0.2454 | 0.3849 | 0.1384  | 0.0840 | 0.1189 | 24.9035 | 0.0969 | -0.9325  |
| LargeArteryStroke | s_Bacteroides_thetaiotaomicron | MR Egger                  | 18 | -0.0910 | 0.1548 | 0.5650 | 0.0201  | 0.0380 | 0.6043 | 15.8026 | 0.4668 | -66.8082 |
| LargeArteryStroke | s_Bacteroides_thetaiotaomicron | Weighted median           | 18 | -0.0776 | 0.0703 | 0.2699 | 0.0201  | 0.0380 | 0.6043 | 15.8026 | 0.4668 | -66.8082 |
| LargeArteryStroke | s_Bacteroides_thetaiotaomicron | Inverse variance weighted | 18 | -0.0137 | 0.0508 | 0.7880 | 0.0201  | 0.0380 | 0.6043 | 15.8026 | 0.4668 | -66.8082 |

|                   |                                                                          |                           |    |         |        |        |         |        |        |         |        |           |
|-------------------|--------------------------------------------------------------------------|---------------------------|----|---------|--------|--------|---------|--------|--------|---------|--------|-----------|
| LargeArteryStroke | s_Bacteroides_thetaiotaomicron                                           | Simple mode               | 18 | -0.1339 | 0.1409 | 0.3553 | 0.0201  | 0.0380 | 0.6043 | 15.8026 | 0.4668 | -66.8082  |
| LargeArteryStroke | s_Bacteroides_thetaiotaomicron                                           | Weighted mode             | 18 | -0.1309 | 0.1266 | 0.3154 | 0.0201  | 0.0380 | 0.6043 | 15.8026 | 0.4668 | -66.8082  |
| LargeArteryStroke | s_Bacteroides_uniformis                                                  | MR Egger                  | 18 | 0.0088  | 0.2028 | 0.9660 | 0.0136  | 0.0497 | 0.7883 | 18.2426 | 0.3099 | -26.6369  |
| LargeArteryStroke | s_Bacteroides_uniformis                                                  | Weighted median           | 18 | 0.1019  | 0.0868 | 0.2402 | 0.0136  | 0.0497 | 0.7883 | 18.2426 | 0.3099 | -26.6369  |
| LargeArteryStroke | s_Bacteroides_uniformis                                                  | Inverse variance weighted | 18 | 0.0611  | 0.0648 | 0.3456 | 0.0136  | 0.0497 | 0.7883 | 18.2426 | 0.3099 | -26.6369  |
| LargeArteryStroke | s_Bacteroides_uniformis                                                  | Simple mode               | 18 | 0.1916  | 0.1645 | 0.2604 | 0.0136  | 0.0497 | 0.7883 | 18.2426 | 0.3099 | -26.6369  |
| LargeArteryStroke | s_Bacteroides_uniformis                                                  | Weighted mode             | 18 | 0.1498  | 0.1538 | 0.3438 | 0.0136  | 0.0497 | 0.7883 | 18.2426 | 0.3099 | -26.6369  |
| LargeArteryStroke | s_Bacteroides_xylanisolvens                                              | MR Egger                  | 18 | -0.0148 | 0.1594 | 0.9274 | 0.0051  | 0.0391 | 0.8982 | 13.8311 | 0.6113 | -72.7194  |
| LargeArteryStroke | s_Bacteroides_xylanisolvens                                              | Weighted median           | 18 | 0.0654  | 0.0721 | 0.3640 | 0.0051  | 0.0391 | 0.8982 | 13.8311 | 0.6113 | -72.7194  |
| LargeArteryStroke | s_Bacteroides_xylanisolvens                                              | Inverse variance weighted | 18 | 0.0048  | 0.0523 | 0.9266 | 0.0051  | 0.0391 | 0.8982 | 13.8311 | 0.6113 | -72.7194  |
| LargeArteryStroke | s_Bacteroides_xylanisolvens                                              | Simple mode               | 18 | 0.1149  | 0.1332 | 0.4007 | 0.0051  | 0.0391 | 0.8982 | 13.8311 | 0.6113 | -72.7194  |
| LargeArteryStroke | s_Bacteroides_xylanisolvens                                              | Weighted mode             | 18 | 0.1149  | 0.1259 | 0.3743 | 0.0051  | 0.0391 | 0.8982 | 13.8311 | 0.6113 | -72.7194  |
| LargeArteryStroke | s_Bifidobacterium_adolescentis                                           | MR Egger                  | 18 | -0.2649 | 0.4053 | 0.5226 | 0.0932  | 0.0994 | 0.3623 | 6.2838  | 0.9911 | -13.7926  |
| LargeArteryStroke | s_Bifidobacterium_adolescentis                                           | Weighted median           | 18 | 0.0703  | 0.1678 | 0.6752 | 0.0932  | 0.0994 | 0.3623 | 6.2838  | 0.9911 | -13.7926  |
| LargeArteryStroke | s_Bifidobacterium_adolescentis                                           | Inverse variance weighted | 18 | 0.0940  | 0.1331 | 0.4800 | 0.0932  | 0.0994 | 0.3623 | 6.2838  | 0.9911 | -13.7926  |
| LargeArteryStroke | s_Bifidobacterium_adolescentis                                           | Simple mode               | 18 | 0.0576  | 0.2778 | 0.8383 | 0.0932  | 0.0994 | 0.3623 | 6.2838  | 0.9911 | -13.7926  |
| LargeArteryStroke | s_Bifidobacterium_adolescentis                                           | Weighted mode             | 18 | 0.0622  | 0.2689 | 0.8199 | 0.0932  | 0.0994 | 0.3623 | 6.2838  | 0.9911 | -13.7926  |
| LargeArteryStroke | s_Bifidobacterium_animalis                                               | MR Egger                  | 18 | 0.1461  | 0.2675 | 0.5924 | -0.0632 | 0.0656 | 0.3497 | 13.5788 | 0.6301 | -8.2672   |
| LargeArteryStroke | s_Bifidobacterium_animalis                                               | Weighted median           | 18 | -0.1824 | 0.1258 | 0.1473 | -0.0632 | 0.0656 | 0.3497 | 13.5788 | 0.6301 | -8.2672   |
| LargeArteryStroke | s_Bifidobacterium_animalis                                               | Inverse variance weighted | 18 | -0.0973 | 0.0878 | 0.2682 | -0.0632 | 0.0656 | 0.3497 | 13.5788 | 0.6301 | -8.2672   |
| LargeArteryStroke | s_Bifidobacterium_animalis                                               | Simple mode               | 18 | -0.2885 | 0.2014 | 0.1701 | -0.0632 | 0.0656 | 0.3497 | 13.5788 | 0.6301 | -8.2672   |
| LargeArteryStroke | s_Bifidobacterium_animalis                                               | Weighted mode             | 18 | -0.2836 | 0.1890 | 0.1518 | -0.0632 | 0.0656 | 0.3497 | 13.5788 | 0.6301 | -8.2672   |
| LargeArteryStroke | s_Bifidobacterium_bifidum                                                | MR Egger                  | 18 | -0.3795 | 0.4361 | 0.3970 | 0.0871  | 0.1069 | 0.4271 | 18.8762 | 0.2751 | -0.2764   |
| LargeArteryStroke | s_Bifidobacterium_bifidum                                                | Weighted median           | 18 | -0.1718 | 0.1835 | 0.3493 | 0.0871  | 0.1069 | 0.4271 | 18.8762 | 0.2751 | -0.2764   |
| LargeArteryStroke | s_Bifidobacterium_bifidum                                                | Inverse variance weighted | 18 | -0.0439 | 0.1418 | 0.7570 | 0.0871  | 0.1069 | 0.4271 | 18.8762 | 0.2751 | -0.2764   |
| LargeArteryStroke | s_Bifidobacterium_bifidum                                                | Simple mode               | 18 | -0.3113 | 0.3082 | 0.3267 | 0.0871  | 0.1069 | 0.4271 | 18.8762 | 0.2751 | -0.2764   |
| LargeArteryStroke | s_Bifidobacterium_bifidum                                                | Weighted mode             | 18 | -0.3205 | 0.2907 | 0.2856 | 0.0871  | 0.1069 | 0.4271 | 18.8762 | 0.2751 | -0.2764   |
| LargeArteryStroke | s_Bifidobacterium_breve                                                  | MR Egger                  | 18 | 0.1780  | 0.2709 | 0.5205 | -0.0484 | 0.0664 | 0.4767 | 11.4487 | 0.7810 | -21.3768  |
| LargeArteryStroke | s_Bifidobacterium_breve                                                  | Weighted median           | 18 | -0.0390 | 0.1262 | 0.7572 | -0.0484 | 0.0664 | 0.4767 | 11.4487 | 0.7810 | -21.3768  |
| LargeArteryStroke | s_Bifidobacterium_breve                                                  | Inverse variance weighted | 18 | -0.0085 | 0.0890 | 0.9240 | -0.0484 | 0.0664 | 0.4767 | 11.4487 | 0.7810 | -21.3768  |
| LargeArteryStroke | s_Bifidobacterium_breve                                                  | Simple mode               | 18 | -0.1601 | 0.2155 | 0.4678 | -0.0484 | 0.0664 | 0.4767 | 11.4487 | 0.7810 | -21.3768  |
| LargeArteryStroke | s_Bifidobacterium_breve                                                  | Weighted mode             | 18 | -0.1601 | 0.2013 | 0.4375 | -0.0484 | 0.0664 | 0.4767 | 11.4487 | 0.7810 | -21.3768  |
| LargeArteryStroke | s_Bifidobacterium_catenumlatum-Bifidobacterium_pseudocatenulatum_complex | MR Egger                  | 18 | 0.1552  | 0.2871 | 0.5963 | -0.0581 | 0.0704 | 0.4211 | 15.5955 | 0.4815 | -3.5109   |
| LargeArteryStroke | s_Bifidobacterium_catenumlatum-Bifidobacterium_pseudocatenulatum_complex | Weighted median           | 18 | 0.0298  | 0.1302 | 0.8190 | -0.0581 | 0.0704 | 0.4211 | 15.5955 | 0.4815 | -3.5109   |
| LargeArteryStroke | s_Bifidobacterium_catenumlatum-Bifidobacterium_pseudocatenulatum_complex | Inverse variance weighted | 18 | -0.0688 | 0.0943 | 0.4658 | -0.0581 | 0.0704 | 0.4211 | 15.5955 | 0.4815 | -3.5109   |
| LargeArteryStroke | s_Bifidobacterium_catenumlatum-Bifidobacterium_pseudocatenulatum_complex | Simple mode               | 18 | 0.1220  | 0.2401 | 0.6178 | -0.0581 | 0.0704 | 0.4211 | 15.5955 | 0.4815 | -3.5109   |
| LargeArteryStroke | s_Bifidobacterium_catenumlatum-Bifidobacterium_pseudocatenulatum_complex | Weighted mode             | 18 | 0.1066  | 0.2160 | 0.6281 | -0.0581 | 0.0704 | 0.4211 | 15.5955 | 0.4815 | -3.5109   |
| LargeArteryStroke | s_Bifidobacterium_longum                                                 | MR Egger                  | 18 | 0.2527  | 0.2440 | 0.3158 | -0.0716 | 0.0598 | 0.2492 | 11.3611 | 0.8372 | -14.7272  |
| LargeArteryStroke | s_Bifidobacterium_longum                                                 | Weighted median           | 18 | -0.0315 | 0.1104 | 0.7752 | -0.0716 | 0.0598 | 0.2492 | 11.3611 | 0.8372 | -14.7272  |
| LargeArteryStroke | s_Bifidobacterium_longum                                                 | Inverse variance weighted | 18 | -0.0229 | 0.0801 | 0.7747 | -0.0716 | 0.0598 | 0.2492 | 11.3611 | 0.8372 | -14.7272  |
| LargeArteryStroke | s_Bifidobacterium_longum                                                 | Simple mode               | 18 | -0.0351 | 0.1648 | 0.8336 | -0.0716 | 0.0598 | 0.2492 | 11.3611 | 0.8372 | -14.7272  |
| LargeArteryStroke | s_Bifidobacterium_longum                                                 | Weighted mode             | 18 | -0.0492 | 0.1647 | 0.7688 | -0.0716 | 0.0598 | 0.2492 | 11.3611 | 0.8372 | -14.7272  |
| LargeArteryStroke | s_Bilophila_wadsworthia                                                  | MR Egger                  | 18 | -0.1382 | 0.2483 | 0.5856 | 0.0215  | 0.0609 | 0.7283 | 10.8561 | 0.8183 | -16.2437  |
| LargeArteryStroke | s_Bilophila_wadsworthia                                                  | Weighted median           | 18 | -0.0680 | 0.1112 | 0.5406 | 0.0215  | 0.0609 | 0.7283 | 10.8561 | 0.8183 | -16.2437  |
| LargeArteryStroke | s_Bilophila_wadsworthia                                                  | Inverse variance weighted | 18 | -0.0553 | 0.0816 | 0.4981 | 0.0215  | 0.0609 | 0.7283 | 10.8561 | 0.8183 | -16.2437  |
| LargeArteryStroke | s_Bilophila_wadsworthia                                                  | Simple mode               | 18 | -0.0952 | 0.1922 | 0.6268 | 0.0215  | 0.0609 | 0.7283 | 10.8561 | 0.8183 | -16.2437  |
| LargeArteryStroke | s_Bilophila_wadsworthia                                                  | Weighted mode             | 18 | -0.0904 | 0.1652 | 0.5911 | 0.0215  | 0.0609 | 0.7283 | 10.8561 | 0.8183 | -16.2437  |
| LargeArteryStroke | s_Blautia_hansenii                                                       | MR Egger                  | 18 | 0.0814  | 0.1093 | 0.4673 | -0.0092 | 0.0268 | 0.7356 | 12.1702 | 0.7322 | -141.2170 |
| LargeArteryStroke | s_Blautia_hansenii                                                       | Weighted median           | 18 | 0.0021  | 0.0491 | 0.9661 | -0.0092 | 0.0268 | 0.7356 | 12.1702 | 0.7322 | -141.2170 |
| LargeArteryStroke | s_Blautia_hansenii                                                       | Inverse variance weighted | 18 | 0.0459  | 0.0359 | 0.2009 | -0.0092 | 0.0268 | 0.7356 | 12.1702 | 0.7322 | -141.2170 |
| LargeArteryStroke | s_Blautia_hansenii                                                       | Simple mode               | 18 | -0.0247 | 0.0927 | 0.7931 | -0.0092 | 0.0268 | 0.7356 | 12.1702 | 0.7322 | -141.2170 |
| LargeArteryStroke | s_Blautia_hansenii                                                       | Weighted mode             | 18 | -0.0264 | 0.0808 | 0.7481 | -0.0092 | 0.0268 | 0.7356 | 12.1702 | 0.7322 | -141.2170 |
| LargeArteryStroke | s_Blautia_hydrogenotrophica                                              | MR Egger                  | 18 | 0.0777  | 0.1406 | 0.5884 | -0.0079 | 0.0345 | 0.8210 | 20.5726 | 0.1955 | -117.0988 |
| LargeArteryStroke | s_Blautia_hydrogenotrophica                                              | Weighted median           | 18 | 0.0594  | 0.0610 | 0.3298 | -0.0079 | 0.0345 | 0.8210 | 20.5726 | 0.1955 | -117.0988 |
| LargeArteryStroke | s_Blautia_hydrogenotrophica                                              | Inverse variance weighted | 18 | 0.0471  | 0.0449 | 0.2937 | -0.0079 | 0.0345 | 0.8210 | 20.5726 | 0.1955 | -117.0988 |
| LargeArteryStroke | s_Blautia_hydrogenotrophica                                              | Simple mode               | 18 | 0.1240  | 0.1100 | 0.2751 | -0.0079 | 0.0345 | 0.8210 | 20.5726 | 0.1955 | -117.0988 |
| LargeArteryStroke | s_Blautia_hydrogenotrophica                                              | Weighted mode             | 18 | 0.0803  | 0.1049 | 0.4547 | -0.0079 | 0.0345 | 0.8210 | 20.5726 | 0.1955 | -117.0988 |
| LargeArteryStroke | s_Butyriivibrio_crossotus                                                | MR Egger                  | 18 | 0.1137  | 0.1565 | 0.4780 | -0.0054 | 0.0384 | 0.8907 | 8.3799  | 0.9367 | -69.0896  |
| LargeArteryStroke | s_Butyriivibrio_crossotus                                                | Weighted median           | 18 | 0.1011  | 0.0679 | 0.1361 | -0.0054 | 0.0384 | 0.8907 | 8.3799  | 0.9367 | -69.0896  |
| LargeArteryStroke | s_Butyriivibrio_crossotus                                                | Inverse variance weighted | 18 | 0.0931  | 0.0514 | 0.0702 | -0.0054 | 0.0384 | 0.8907 | 8.3799  | 0.9367 | -69.0896  |
| LargeArteryStroke | s_Butyriivibrio_crossotus                                                | Simple mode               | 18 | 0.1081  | 0.1146 | 0.3585 | -0.0054 | 0.0384 | 0.8907 | 8.3799  | 0.9367 | -69.0896  |

|                   |                                 |                           |    |         |        |        |         |        |        |         |        |          |
|-------------------|---------------------------------|---------------------------|----|---------|--------|--------|---------|--------|--------|---------|--------|----------|
| LargeArteryStroke | s_Butyrivibrio_crossotus        | Weighted mode             | 18 | 0.0980  | 0.1091 | 0.3817 | -0.0054 | 0.0384 | 0.8907 | 8.3799  | 0.9367 | -69.0896 |
| LargeArteryStroke | s_Campylobacter_jejun           | MR Egger                  | 18 | -0.1388 | 0.1934 | 0.4833 | 0.0262  | 0.0474 | 0.5884 | 17.2679 | 0.3685 | -38.1031 |
| LargeArteryStroke | s_Campylobacter_jejun           | Weighted median           | 18 | 0.0012  | 0.0891 | 0.9889 | 0.0262  | 0.0474 | 0.5884 | 17.2679 | 0.3685 | -38.1031 |
| LargeArteryStroke | s_Campylobacter_jejun           | Inverse variance weighted | 18 | -0.0379 | 0.0622 | 0.5419 | 0.0262  | 0.0474 | 0.5884 | 17.2679 | 0.3685 | -38.1031 |
| LargeArteryStroke | s_Campylobacter_jejun           | Simple mode               | 18 | 0.0917  | 0.1574 | 0.5677 | 0.0262  | 0.0474 | 0.5884 | 17.2679 | 0.3685 | -38.1031 |
| LargeArteryStroke | s_Campylobacter_jejun           | Weighted mode             | 18 | 0.1228  | 0.1448 | 0.4083 | 0.0262  | 0.0474 | 0.5884 | 17.2679 | 0.3685 | -38.1031 |
| LargeArteryStroke | s_Citrobacter_koseri            | MR Egger                  | 18 | 0.4006  | 0.3563 | 0.2775 | -0.1022 | 0.0874 | 0.2592 | 29.4284 | 0.0308 | -1.6942  |
| LargeArteryStroke | s_Citrobacter_koseri            | Weighted median           | 18 | -0.0230 | 0.1345 | 0.8644 | -0.1022 | 0.0874 | 0.2592 | 29.4284 | 0.0308 | -1.6942  |
| LargeArteryStroke | s_Citrobacter_koseri            | Inverse variance weighted | 18 | 0.0069  | 0.1182 | 0.9535 | -0.1022 | 0.0874 | 0.2592 | 29.4284 | 0.0308 | -1.6942  |
| LargeArteryStroke | s_Citrobacter_koseri            | Simple mode               | 18 | -0.0615 | 0.2234 | 0.7865 | -0.1022 | 0.0874 | 0.2592 | 29.4284 | 0.0308 | -1.6942  |
| LargeArteryStroke | s_Citrobacter_koseri            | Weighted mode             | 18 | -0.0398 | 0.2099 | 0.8520 | -0.1022 | 0.0874 | 0.2592 | 29.4284 | 0.0308 | -1.6942  |
| LargeArteryStroke | s_Citrobacter_youngae           | MR Egger                  | 18 | 0.5725  | 0.3437 | 0.1152 | -0.1460 | 0.0843 | 0.1025 | 16.3229 | 0.5011 | -4.1571  |
| LargeArteryStroke | s_Citrobacter_youngae           | Weighted median           | 18 | -0.0284 | 0.1588 | 0.8579 | -0.1460 | 0.0843 | 0.1025 | 16.3229 | 0.5011 | -4.1571  |
| LargeArteryStroke | s_Citrobacter_youngae           | Inverse variance weighted | 18 | 0.0101  | 0.1129 | 0.9285 | -0.1460 | 0.0843 | 0.1025 | 16.3229 | 0.5011 | -4.1571  |
| LargeArteryStroke | s_Citrobacter_youngae           | Simple mode               | 18 | -0.1253 | 0.2833 | 0.6639 | -0.1460 | 0.0843 | 0.1025 | 16.3229 | 0.5011 | -4.1571  |
| LargeArteryStroke | s_Citrobacter_youngae           | Weighted mode             | 18 | -0.0824 | 0.2601 | 0.7551 | -0.1460 | 0.0843 | 0.1025 | 16.3229 | 0.5011 | -4.1571  |
| LargeArteryStroke | s_Clostridiales_genomosp._BVAB3 | MR Egger                  | 18 | -0.0166 | 0.3609 | 0.9638 | 0.0420  | 0.0884 | 0.6415 | 20.9060 | 0.1822 | -2.5997  |
| LargeArteryStroke | s_Clostridiales_genomosp._BVAB3 | Weighted median           | 18 | 0.1485  | 0.1566 | 0.3429 | 0.0420  | 0.0884 | 0.6415 | 20.9060 | 0.1822 | -2.5997  |
| LargeArteryStroke | s_Clostridiales_genomosp._BVAB3 | Inverse variance weighted | 18 | 0.1451  | 0.1156 | 0.2091 | 0.0420  | 0.0884 | 0.6415 | 20.9060 | 0.1822 | -2.5997  |
| LargeArteryStroke | s_Clostridiales_genomosp._BVAB3 | Simple mode               | 18 | 0.1715  | 0.2632 | 0.5234 | 0.0420  | 0.0884 | 0.6415 | 20.9060 | 0.1822 | -2.5997  |
| LargeArteryStroke | s_Clostridiales_genomosp._BVAB3 | Weighted mode             | 18 | 0.1654  | 0.2486 | 0.5148 | 0.0420  | 0.0884 | 0.6415 | 20.9060 | 0.1822 | -2.5997  |
| LargeArteryStroke | s_Clostridium_bartlettii        | MR Egger                  | 18 | 0.1622  | 0.1815 | 0.3847 | -0.0571 | 0.0445 | 0.2177 | 17.9127 | 0.3944 | NA       |
| LargeArteryStroke | s_Clostridium_bartlettii        | Weighted median           | 18 | -0.1277 | 0.0878 | 0.1461 | -0.0571 | 0.0445 | 0.2177 | 17.9127 | 0.3944 | NA       |
| LargeArteryStroke | s_Clostridium_bartlettii        | Inverse variance weighted | 18 | -0.0578 | 0.0607 | 0.3415 | -0.0571 | 0.0445 | 0.2177 | 17.9127 | 0.3944 | NA       |
| LargeArteryStroke | s_Clostridium_bartlettii        | Simple mode               | 18 | -0.2220 | 0.1557 | 0.1722 | -0.0571 | 0.0445 | 0.2177 | 17.9127 | 0.3944 | NA       |
| LargeArteryStroke | s_Clostridium_bartlettii        | Weighted mode             | 18 | -0.2099 | 0.1461 | 0.1690 | -0.0571 | 0.0445 | 0.2177 | 17.9127 | 0.3944 | NA       |
| LargeArteryStroke | s_Clostridium_bolteae           | MR Egger                  | 18 | 0.0471  | 0.2262 | 0.8378 | -0.0216 | 0.0555 | 0.7017 | 9.0716  | 0.9104 | -61.4345 |
| LargeArteryStroke | s_Clostridium_bolteae           | Weighted median           | 18 | -0.0779 | 0.1022 | 0.4458 | -0.0216 | 0.0555 | 0.7017 | 9.0716  | 0.9104 | -61.4345 |
| LargeArteryStroke | s_Clostridium_bolteae           | Inverse variance weighted | 18 | -0.0363 | 0.0743 | 0.6255 | -0.0216 | 0.0555 | 0.7017 | 9.0716  | 0.9104 | -61.4345 |
| LargeArteryStroke | s_Clostridium_bolteae           | Simple mode               | 18 | -0.1248 | 0.1691 | 0.4705 | -0.0216 | 0.0555 | 0.7017 | 9.0716  | 0.9104 | -61.4345 |
| LargeArteryStroke | s_Clostridium_bolteae           | Weighted mode             | 18 | -0.1062 | 0.1654 | 0.5295 | -0.0216 | 0.0555 | 0.7017 | 9.0716  | 0.9104 | -61.4345 |
| LargeArteryStroke | s_Clostridium_difficile         | MR Egger                  | 18 | 0.1306  | 0.0931 | 0.1799 | -0.0276 | 0.0228 | 0.2441 | 8.7331  | 0.9483 | NA       |
| LargeArteryStroke | s_Clostridium_difficile         | Weighted median           | 18 | 0.0552  | 0.0403 | 0.1712 | -0.0276 | 0.0228 | 0.2441 | 8.7331  | 0.9483 | NA       |
| LargeArteryStroke | s_Clostridium_difficile         | Inverse variance weighted | 18 | 0.0242  | 0.0306 | 0.4279 | -0.0276 | 0.0228 | 0.2441 | 8.7331  | 0.9483 | NA       |
| LargeArteryStroke | s_Clostridium_difficile         | Simple mode               | 18 | 0.0562  | 0.0623 | 0.3800 | -0.0276 | 0.0228 | 0.2441 | 8.7331  | 0.9483 | NA       |
| LargeArteryStroke | s_Clostridium_difficile         | Weighted mode             | 18 | 0.0573  | 0.0602 | 0.3548 | -0.0276 | 0.0228 | 0.2441 | 8.7331  | 0.9483 | NA       |
| LargeArteryStroke | s_Clostridium_leptum            | MR Egger                  | 18 | -0.1073 | 0.2411 | 0.6622 | 0.0489  | 0.0591 | 0.4207 | 17.5033 | 0.3538 | -35.4107 |
| LargeArteryStroke | s_Clostridium_leptum            | Weighted median           | 18 | 0.0798  | 0.1132 | 0.4804 | 0.0489  | 0.0591 | 0.4207 | 17.5033 | 0.3538 | -35.4107 |
| LargeArteryStroke | s_Clostridium_leptum            | Inverse variance weighted | 18 | 0.0809  | 0.0784 | 0.3023 | 0.0489  | 0.0591 | 0.4207 | 17.5033 | 0.3538 | -35.4107 |
| LargeArteryStroke | s_Clostridium_leptum            | Simple mode               | 18 | 0.1286  | 0.1903 | 0.5084 | 0.0489  | 0.0591 | 0.4207 | 17.5033 | 0.3538 | -35.4107 |
| LargeArteryStroke | s_Clostridium_leptum            | Weighted mode             | 18 | 0.0878  | 0.2125 | 0.6848 | 0.0489  | 0.0591 | 0.4207 | 17.5033 | 0.3538 | -35.4107 |
| LargeArteryStroke | s_Clostridium_methylpentosum    | MR Egger                  | 18 | 0.0429  | 0.2153 | 0.8444 | -0.0002 | 0.0528 | 0.9977 | 19.5644 | 0.2405 | -22.5478 |
| LargeArteryStroke | s_Clostridium_methylpentosum    | Weighted median           | 18 | 0.0556  | 0.0914 | 0.5429 | -0.0002 | 0.0528 | 0.9977 | 19.5644 | 0.2405 | -22.5478 |
| LargeArteryStroke | s_Clostridium_methylpentosum    | Inverse variance weighted | 18 | 0.0424  | 0.0686 | 0.5370 | -0.0002 | 0.0528 | 0.9977 | 19.5644 | 0.2405 | -22.5478 |
| LargeArteryStroke | s_Clostridium_methylpentosum    | Simple mode               | 18 | 0.0508  | 0.1589 | 0.7531 | -0.0002 | 0.0528 | 0.9977 | 19.5644 | 0.2405 | -22.5478 |
| LargeArteryStroke | s_Clostridium_methylpentosum    | Weighted mode             | 18 | 0.0639  | 0.1676 | 0.7078 | -0.0002 | 0.0528 | 0.9977 | 19.5644 | 0.2405 | -22.5478 |
| LargeArteryStroke | s_Clostridium_perfringens       | MR Egger                  | 18 | 0.3102  | 0.2928 | 0.3052 | -0.0817 | 0.0718 | 0.2718 | 9.3826  | 0.9275 | -31.1500 |
| LargeArteryStroke | s_Clostridium_perfringens       | Weighted median           | 18 | 0.0440  | 0.1293 | 0.7336 | -0.0817 | 0.0718 | 0.2718 | 9.3826  | 0.9275 | -31.1500 |
| LargeArteryStroke | s_Clostridium_perfringens       | Inverse variance weighted | 18 | -0.0046 | 0.0962 | 0.9617 | -0.0817 | 0.0718 | 0.2718 | 9.3826  | 0.9275 | -31.1500 |
| LargeArteryStroke | s_Clostridium_perfringens       | Simple mode               | 18 | 0.0200  | 0.2211 | 0.9289 | -0.0817 | 0.0718 | 0.2718 | 9.3826  | 0.9275 | -31.1500 |
| LargeArteryStroke | s_Clostridium_perfringens       | Weighted mode             | 18 | 0.0240  | 0.2189 | 0.9140 | -0.0817 | 0.0718 | 0.2718 | 9.3826  | 0.9275 | -31.1500 |
| LargeArteryStroke | s_Clostridium_amosum            | MR Egger                  | 18 | 0.2151  | 0.2518 | 0.4056 | -0.0480 | 0.0618 | 0.4480 | 16.7878 | 0.3995 | -24.6942 |
| LargeArteryStroke | s_Clostridium_amosum            | Weighted median           | 18 | -0.0485 | 0.1146 | 0.6720 | -0.0480 | 0.0618 | 0.4480 | 16.7878 | 0.3995 | -24.6942 |
| LargeArteryStroke | s_Clostridium_amosum            | Inverse variance weighted | 18 | 0.0301  | 0.0817 | 0.7130 | -0.0480 | 0.0618 | 0.4480 | 16.7878 | 0.3995 | -24.6942 |
| LargeArteryStroke | s_Clostridium_amosum            | Simple mode               | 18 | -0.0295 | 0.2011 | 0.8849 | -0.0480 | 0.0618 | 0.4480 | 16.7878 | 0.3995 | -24.6942 |
| LargeArteryStroke | s_Clostridium_amosum            | Weighted mode             | 18 | -0.0022 | 0.1844 | 0.9907 | -0.0480 | 0.0618 | 0.4480 | 16.7878 | 0.3995 | -24.6942 |
| LargeArteryStroke | s_Clostridium_saccharolyticum   | MR Egger                  | 18 | 0.0110  | 0.1290 | 0.9333 | 0.0023  | 0.0316 | 0.9435 | 20.3405 | 0.2053 | -67.5446 |
| LargeArteryStroke | s_Clostridium_saccharolyticum   | Weighted median           | 18 | 0.0489  | 0.0544 | 0.3688 | 0.0023  | 0.0316 | 0.9435 | 20.3405 | 0.2053 | -67.5446 |
| LargeArteryStroke | s_Clostridium_saccharolyticum   | Inverse variance weighted | 18 | 0.0197  | 0.0411 | 0.6310 | 0.0023  | 0.0316 | 0.9435 | 20.3405 | 0.2053 | -67.5446 |
| LargeArteryStroke | s_Clostridium_saccharolyticum   | Simple mode               | 18 | 0.0883  | 0.0953 | 0.3670 | 0.0023  | 0.0316 | 0.9435 | 20.3405 | 0.2053 | -67.5446 |
| LargeArteryStroke | s_Clostridium_saccharolyticum   | Weighted mode             | 18 | 0.0854  | 0.0879 | 0.3449 | 0.0023  | 0.0316 | 0.9435 | 20.3405 | 0.2053 | -67.5446 |

|                   |                           |                           |    |         |        |        |         |        |        |         |        |           |
|-------------------|---------------------------|---------------------------|----|---------|--------|--------|---------|--------|--------|---------|--------|-----------|
| LargeArteryStroke | s_Clostridium_spiroforme  | MR Egger                  | 18 | 0.3993  | 0.2371 | 0.1115 | -0.0796 | 0.0581 | 0.1897 | 22.8617 | 0.1538 | -23.5496  |
| LargeArteryStroke | s_Clostridium_spiroforme  | Weighted median           | 18 | 0.0128  | 0.1046 | 0.9028 | -0.0796 | 0.0581 | 0.1897 | 22.8617 | 0.1538 | -23.5496  |
| LargeArteryStroke | s_Clostridium_spiroforme  | Inverse variance weighted | 18 | 0.0926  | 0.0798 | 0.2463 | -0.0796 | 0.0581 | 0.1897 | 22.8617 | 0.1538 | -23.5496  |
| LargeArteryStroke | s_Clostridium_spiroforme  | Simple mode               | 18 | -0.1083 | 0.1752 | 0.5448 | -0.0796 | 0.0581 | 0.1897 | 22.8617 | 0.1538 | -23.5496  |
| LargeArteryStroke | s_Clostridium_spiroforme  | Weighted mode             | 18 | -0.0836 | 0.1526 | 0.5912 | -0.0796 | 0.0581 | 0.1897 | 22.8617 | 0.1538 | -23.5496  |
| LargeArteryStroke | s_Collinsella_aerofaciens | MR Egger                  | 18 | -0.2459 | 0.3767 | 0.5231 | 0.0848  | 0.0924 | 0.3720 | 16.1764 | 0.4407 | -10.8962  |
| LargeArteryStroke | s_Collinsella_aerofaciens | Weighted median           | 18 | 0.0102  | 0.1736 | 0.9533 | 0.0848  | 0.0924 | 0.3720 | 16.1764 | 0.4407 | -10.8962  |
| LargeArteryStroke | s_Collinsella_aerofaciens | Inverse variance weighted | 18 | 0.0809  | 0.1231 | 0.5114 | 0.0848  | 0.0924 | 0.3720 | 16.1764 | 0.4407 | -10.8962  |
| LargeArteryStroke | s_Collinsella_aerofaciens | Simple mode               | 18 | -0.0360 | 0.3147 | 0.9103 | 0.0848  | 0.0924 | 0.3720 | 16.1764 | 0.4407 | -10.8962  |
| LargeArteryStroke | s_Collinsella_aerofaciens | Weighted mode             | 18 | -0.0296 | 0.2767 | 0.9160 | 0.0848  | 0.0924 | 0.3720 | 16.1764 | 0.4407 | -10.8962  |
| LargeArteryStroke | s_Coprococcus_catus       | MR Egger                  | 18 | 0.1776  | 0.1286 | 0.1864 | -0.0258 | 0.0315 | 0.4254 | 9.8815  | 0.8727 | -121.3176 |
| LargeArteryStroke | s_Coprococcus_catus       | Weighted median           | 18 | 0.0397  | 0.0572 | 0.4878 | -0.0258 | 0.0315 | 0.4254 | 9.8815  | 0.8727 | -121.3176 |
| LargeArteryStroke | s_Coprococcus_catus       | Inverse variance weighted | 18 | 0.0782  | 0.0422 | 0.0642 | -0.0258 | 0.0315 | 0.4254 | 9.8815  | 0.8727 | -121.3176 |
| LargeArteryStroke | s_Coprococcus_catus       | Simple mode               | 18 | 0.0279  | 0.0979 | 0.7790 | -0.0258 | 0.0315 | 0.4254 | 9.8815  | 0.8727 | -121.3176 |
| LargeArteryStroke | s_Coprococcus_catus       | Weighted mode             | 18 | 0.0220  | 0.0949 | 0.8195 | -0.0258 | 0.0315 | 0.4254 | 9.8815  | 0.8727 | -121.3176 |
| LargeArteryStroke | s_Coprococcus_eutactus    | MR Egger                  | 18 | -0.2066 | 0.2267 | 0.3758 | 0.0615  | 0.0556 | 0.2847 | 13.7288 | 0.6862 | -54.7494  |
| LargeArteryStroke | s_Coprococcus_eutactus    | Weighted median           | 18 | 0.0621  | 0.0982 | 0.5276 | 0.0615  | 0.0556 | 0.2847 | 13.7288 | 0.6862 | -54.7494  |
| LargeArteryStroke | s_Coprococcus_eutactus    | Inverse variance weighted | 18 | 0.0305  | 0.0744 | 0.6821 | 0.0615  | 0.0556 | 0.2847 | 13.7288 | 0.6862 | -54.7494  |
| LargeArteryStroke | s_Coprococcus_eutactus    | Simple mode               | 18 | 0.2042  | 0.1926 | 0.3038 | 0.0615  | 0.0556 | 0.2847 | 13.7288 | 0.6862 | -54.7494  |
| LargeArteryStroke | s_Coprococcus_eutactus    | Weighted mode             | 18 | 0.1801  | 0.1933 | 0.3647 | 0.0615  | 0.0556 | 0.2847 | 13.7288 | 0.6862 | -54.7494  |
| LargeArteryStroke | s_Desulfovibrio_piger     | MR Egger                  | 18 | 0.0268  | 0.4630 | 0.9545 | -0.1009 | 0.1135 | 0.3873 | 16.7280 | 0.4034 | -0.4065   |
| LargeArteryStroke | s_Desulfovibrio_piger     | Weighted median           | 18 | -0.4683 | 0.2061 | 0.0231 | -0.1009 | 0.1135 | 0.3873 | 16.7280 | 0.4034 | -0.4065   |
| LargeArteryStroke | s_Desulfovibrio_piger     | Inverse variance weighted | 18 | -0.3619 | 0.1511 | 0.0166 | -0.1009 | 0.1135 | 0.3873 | 16.7280 | 0.4034 | -0.4065   |
| LargeArteryStroke | s_Desulfovibrio_piger     | Simple mode               | 18 | -0.7336 | 0.3348 | 0.0427 | -0.1009 | 0.1135 | 0.3873 | 16.7280 | 0.4034 | -0.4065   |
| LargeArteryStroke | s_Desulfovibrio_piger     | Weighted mode             | 18 | -0.7248 | 0.3380 | 0.0468 | -0.1009 | 0.1135 | 0.3873 | 16.7280 | 0.4034 | -0.4065   |
| LargeArteryStroke | s_Dorea_formicigenerans   | MR Egger                  | 18 | 0.2139  | 0.1285 | 0.1156 | -0.0419 | 0.0315 | 0.2029 | 11.0619 | 0.8533 | -93.3871  |
| LargeArteryStroke | s_Dorea_formicigenerans   | Weighted median           | 18 | 0.0395  | 0.0568 | 0.4875 | -0.0419 | 0.0315 | 0.2029 | 11.0619 | 0.8533 | -93.3871  |
| LargeArteryStroke | s_Dorea_formicigenerans   | Inverse variance weighted | 18 | 0.0527  | 0.0422 | 0.2122 | -0.0419 | 0.0315 | 0.2029 | 11.0619 | 0.8533 | -93.3871  |
| LargeArteryStroke | s_Dorea_formicigenerans   | Simple mode               | 18 | 0.0286  | 0.0995 | 0.7769 | -0.0419 | 0.0315 | 0.2029 | 11.0619 | 0.8533 | -93.3871  |
| LargeArteryStroke | s_Dorea_formicigenerans   | Weighted mode             | 18 | 0.0204  | 0.0906 | 0.8244 | -0.0419 | 0.0315 | 0.2029 | 11.0619 | 0.8533 | -93.3871  |
| LargeArteryStroke | s_Dorea_longicatena       | MR Egger                  | 18 | 0.1838  | 0.1586 | 0.2636 | -0.0331 | 0.0389 | 0.4070 | 12.5542 | 0.7050 | -64.7420  |
| LargeArteryStroke | s_Dorea_longicatena       | Weighted median           | 18 | 0.0493  | 0.0726 | 0.4973 | -0.0331 | 0.0389 | 0.4070 | 12.5542 | 0.7050 | -64.7420  |
| LargeArteryStroke | s_Dorea_longicatena       | Inverse variance weighted | 18 | 0.0562  | 0.0521 | 0.2806 | -0.0331 | 0.0389 | 0.4070 | 12.5542 | 0.7050 | -64.7420  |
| LargeArteryStroke | s_Dorea_longicatena       | Simple mode               | 18 | 0.0948  | 0.1308 | 0.4785 | -0.0331 | 0.0389 | 0.4070 | 12.5542 | 0.7050 | -64.7420  |
| LargeArteryStroke | s_Dorea_longicatena       | Weighted mode             | 18 | 0.0609  | 0.1196 | 0.6175 | -0.0331 | 0.0389 | 0.4070 | 12.5542 | 0.7050 | -64.7420  |
| LargeArteryStroke | s_Eggerthella_lenta       | MR Egger                  | 18 | -0.1857 | 0.2714 | 0.5036 | -0.0148 | 0.0666 | 0.8266 | 14.0482 | 0.5951 | -3.6631   |
| LargeArteryStroke | s_Eggerthella_lenta       | Weighted median           | 18 | -0.2779 | 0.1172 | 0.0177 | -0.0148 | 0.0666 | 0.8266 | 14.0482 | 0.5951 | -3.6631   |
| LargeArteryStroke | s_Eggerthella_lenta       | Inverse variance weighted | 18 | -0.2428 | 0.0891 | 0.0065 | -0.0148 | 0.0666 | 0.8266 | 14.0482 | 0.5951 | -3.6631   |
| LargeArteryStroke | s_Eggerthella_lenta       | Simple mode               | 18 | -0.2924 | 0.2018 | 0.1655 | -0.0148 | 0.0666 | 0.8266 | 14.0482 | 0.5951 | -3.6631   |
| LargeArteryStroke | s_Eggerthella_lenta       | Weighted mode             | 18 | -0.2924 | 0.1957 | 0.1534 | -0.0148 | 0.0666 | 0.8266 | 14.0482 | 0.5951 | -3.6631   |
| LargeArteryStroke | s_Enterobacter_aerogenes  | MR Egger                  | 18 | 0.2032  | 0.4237 | 0.6380 | -0.0884 | 0.1039 | 0.4075 | 22.0899 | 0.1403 | -0.2767   |
| LargeArteryStroke | s_Enterobacter_aerogenes  | Weighted median           | 18 | -0.1953 | 0.1665 | 0.2407 | -0.0884 | 0.1039 | 0.4075 | 22.0899 | 0.1403 | -0.2767   |
| LargeArteryStroke | s_Enterobacter_aerogenes  | Inverse variance weighted | 18 | -0.1372 | 0.1380 | 0.3200 | -0.0884 | 0.1039 | 0.4075 | 22.0899 | 0.1403 | -0.2767   |
| LargeArteryStroke | s_Enterobacter_aerogenes  | Simple mode               | 18 | -0.2826 | 0.2893 | 0.3423 | -0.0884 | 0.1039 | 0.4075 | 22.0899 | 0.1403 | -0.2767   |
| LargeArteryStroke | s_Enterobacter_aerogenes  | Weighted mode             | 18 | -0.1876 | 0.2775 | 0.5081 | -0.0884 | 0.1039 | 0.4075 | 22.0899 | 0.1403 | -0.2767   |
| LargeArteryStroke | s_Enterobacter_cloacae    | MR Egger                  | 18 | 0.5234  | 0.4325 | 0.2438 | -0.1441 | 0.1061 | 0.1931 | 31.1795 | 0.0190 | -0.7195   |
| LargeArteryStroke | s_Enterobacter_cloacae    | Weighted median           | 18 | 0.1162  | 0.1633 | 0.4768 | -0.1441 | 0.1061 | 0.1931 | 31.1795 | 0.0190 | -0.7195   |
| LargeArteryStroke | s_Enterobacter_cloacae    | Inverse variance weighted | 18 | -0.0316 | 0.1455 | 0.8279 | -0.1441 | 0.1061 | 0.1931 | 31.1795 | 0.0190 | -0.7195   |
| LargeArteryStroke | s_Enterobacter_cloacae    | Simple mode               | 18 | 0.2337  | 0.3604 | 0.5253 | -0.1441 | 0.1061 | 0.1931 | 31.1795 | 0.0190 | -0.7195   |
| LargeArteryStroke | s_Enterobacter_cloacae    | Weighted mode             | 18 | 0.2337  | 0.2978 | 0.4434 | -0.1441 | 0.1061 | 0.1931 | 31.1795 | 0.0190 | -0.7195   |
| LargeArteryStroke | s_Enterococcus_faecalis   | MR Egger                  | 18 | 0.1634  | 0.1285 | 0.2215 | -0.0387 | 0.0315 | 0.2373 | 13.0826 | 0.7306 | -126.6890 |
| LargeArteryStroke | s_Enterococcus_faecalis   | Weighted median           | 18 | 0.0329  | 0.0571 | 0.5643 | -0.0387 | 0.0315 | 0.2373 | 13.0826 | 0.7306 | -126.6890 |
| LargeArteryStroke | s_Enterococcus_faecalis   | Inverse variance weighted | 18 | 0.0145  | 0.0422 | 0.7319 | -0.0387 | 0.0315 | 0.2373 | 13.0826 | 0.7306 | -126.6890 |
| LargeArteryStroke | s_Enterococcus_faecalis   | Simple mode               | 18 | -0.1291 | 0.1128 | 0.2683 | -0.0387 | 0.0315 | 0.2373 | 13.0826 | 0.7306 | -126.6890 |
| LargeArteryStroke | s_Enterococcus_faecalis   | Weighted mode             | 18 | 0.1352  | 0.1062 | 0.2198 | -0.0387 | 0.0315 | 0.2373 | 13.0826 | 0.7306 | -126.6890 |
| LargeArteryStroke | s_Enterococcus_faecium    | MR Egger                  | 18 | 0.2431  | 0.1398 | 0.1011 | -0.0545 | 0.0343 | 0.1313 | 22.1297 | 0.1798 | -84.3693  |
| LargeArteryStroke | s_Enterococcus_faecium    | Weighted median           | 18 | 0.1138  | 0.0605 | 0.0602 | -0.0545 | 0.0343 | 0.1313 | 22.1297 | 0.1798 | -84.3693  |
| LargeArteryStroke | s_Enterococcus_faecium    | Inverse variance weighted | 18 | 0.0332  | 0.0479 | 0.4884 | -0.0545 | 0.0343 | 0.1313 | 22.1297 | 0.1798 | -84.3693  |
| LargeArteryStroke | s_Enterococcus_faecium    | Simple mode               | 18 | 0.1954  | 0.1300 | 0.1512 | -0.0545 | 0.0343 | 0.1313 | 22.1297 | 0.1798 | -84.3693  |
| LargeArteryStroke | s_Enterococcus_faecium    | Weighted mode             | 18 | 0.1800  | 0.1212 | 0.1556 | -0.0545 | 0.0343 | 0.1313 | 22.1297 | 0.1798 | -84.3693  |
| LargeArteryStroke | s_Escherichia_coli        | MR Egger                  | 18 | 0.5247  | 0.3247 | 0.1256 | -0.1211 | 0.0796 | 0.1480 | 28.1015 | 0.0438 | -11.3332  |

|                   |                                |                           |    |         |        |        |         |        |        |         |        |           |
|-------------------|--------------------------------|---------------------------|----|---------|--------|--------|---------|--------|--------|---------|--------|-----------|
| LargeArteryStroke | s_Escherichia_coli             | Weighted median           | 18 | -0.1218 | 0.1255 | 0.3316 | -0.1211 | 0.0796 | 0.1480 | 28.1015 | 0.0438 | -11.3332  |
| LargeArteryStroke | s_Escherichia_coli             | Inverse variance weighted | 18 | 0.0585  | 0.1106 | 0.5967 | -0.1211 | 0.0796 | 0.1480 | 28.1015 | 0.0438 | -11.3332  |
| LargeArteryStroke | s_Escherichia_coli             | Simple mode               | 18 | -0.2171 | 0.2367 | 0.3719 | -0.1211 | 0.0796 | 0.1480 | 28.1015 | 0.0438 | -11.3332  |
| LargeArteryStroke | s_Escherichia_coli             | Weighted mode             | 18 | -0.1639 | 0.2223 | 0.4712 | -0.1211 | 0.0796 | 0.1480 | 28.1015 | 0.0438 | -11.3332  |
| LargeArteryStroke | s_Eubacterium_biforme          | MR Egger                  | 18 | 0.2891  | 0.2443 | 0.2538 | -0.0563 | 0.0599 | 0.3615 | 12.2174 | 0.7289 | -5.9081   |
| LargeArteryStroke | s_Eubacterium_biforme          | Weighted median           | 18 | 0.0185  | 0.1068 | 0.8625 | -0.0563 | 0.0599 | 0.3615 | 12.2174 | 0.7289 | -5.9081   |
| LargeArteryStroke | s_Eubacterium_biforme          | Inverse variance weighted | 18 | 0.0724  | 0.0802 | 0.3667 | -0.0563 | 0.0599 | 0.3615 | 12.2174 | 0.7289 | -5.9081   |
| LargeArteryStroke | s_Eubacterium_biforme          | Simple mode               | 18 | -0.0099 | 0.1814 | 0.9572 | -0.0563 | 0.0599 | 0.3615 | 12.2174 | 0.7289 | -5.9081   |
| LargeArteryStroke | s_Eubacterium_biforme          | Weighted mode             | 18 | -0.0049 | 0.1691 | 0.9773 | -0.0563 | 0.0599 | 0.3615 | 12.2174 | 0.7289 | -5.9081   |
| LargeArteryStroke | s_Eubacterium_cylindroides     | MR Egger                  | 18 | 0.3065  | 0.1286 | 0.0299 | -0.0499 | 0.0315 | 0.1334 | 10.9373 | 0.8598 | -51.5620  |
| LargeArteryStroke | s_Eubacterium_cylindroides     | Weighted median           | 18 | 0.1403  | 0.0563 | 0.0127 | -0.0499 | 0.0315 | 0.1334 | 10.9373 | 0.8598 | -51.5620  |
| LargeArteryStroke | s_Eubacterium_cylindroides     | Inverse variance weighted | 18 | 0.1145  | 0.0422 | 0.0067 | -0.0499 | 0.0315 | 0.1334 | 10.9373 | 0.8598 | -51.5620  |
| LargeArteryStroke | s_Eubacterium_cylindroides     | Simple mode               | 18 | 0.1678  | 0.0999 | 0.1112 | -0.0499 | 0.0315 | 0.1334 | 10.9373 | 0.8598 | -51.5620  |
| LargeArteryStroke | s_Eubacterium_cylindroides     | Weighted mode             | 18 | 0.1576  | 0.0947 | 0.1145 | -0.0499 | 0.0315 | 0.1334 | 10.9373 | 0.8598 | -51.5620  |
| LargeArteryStroke | s_Eubacterium_dolichum         | MR Egger                  | 18 | -0.0042 | 0.1436 | 0.9772 | 0.0118  | 0.0352 | 0.7412 | 15.3441 | 0.4996 | -122.6721 |
| LargeArteryStroke | s_Eubacterium_dolichum         | Weighted median           | 18 | 0.0558  | 0.0655 | 0.3943 | 0.0118  | 0.0352 | 0.7412 | 15.3441 | 0.4996 | -122.6721 |
| LargeArteryStroke | s_Eubacterium_dolichum         | Inverse variance weighted | 18 | 0.0414  | 0.0472 | 0.3797 | 0.0118  | 0.0352 | 0.7412 | 15.3441 | 0.4996 | -122.6721 |
| LargeArteryStroke | s_Eubacterium_dolichum         | Simple mode               | 18 | 0.0944  | 0.1059 | 0.3852 | 0.0118  | 0.0352 | 0.7412 | 15.3441 | 0.4996 | -122.6721 |
| LargeArteryStroke | s_Eubacterium_dolichum         | Weighted mode             | 18 | 0.0869  | 0.1049 | 0.4192 | 0.0118  | 0.0352 | 0.7412 | 15.3441 | 0.4996 | -122.6721 |
| LargeArteryStroke | s_Eubacterium_eligens          | MR Egger                  | 18 | 0.1653  | 0.2997 | 0.5890 | -0.0235 | 0.0735 | 0.7528 | 10.3480 | 0.8478 | -13.4937  |
| LargeArteryStroke | s_Eubacterium_eligens          | Weighted median           | 18 | 0.0916  | 0.1352 | 0.4982 | -0.0235 | 0.0735 | 0.7528 | 10.3480 | 0.8478 | -13.4937  |
| LargeArteryStroke | s_Eubacterium_eligens          | Inverse variance weighted | 18 | 0.0746  | 0.0984 | 0.4487 | -0.0235 | 0.0735 | 0.7528 | 10.3480 | 0.8478 | -13.4937  |
| LargeArteryStroke | s_Eubacterium_eligens          | Simple mode               | 18 | 0.1332  | 0.2419 | 0.5889 | -0.0235 | 0.0735 | 0.7528 | 10.3480 | 0.8478 | -13.4937  |
| LargeArteryStroke | s_Eubacterium_eligens          | Weighted mode             | 18 | 0.1285  | 0.2452 | 0.6070 | -0.0235 | 0.0735 | 0.7528 | 10.3480 | 0.8478 | -13.4937  |
| LargeArteryStroke | s_Eubacterium_hallii           | MR Egger                  | 18 | 0.3515  | 0.1764 | 0.0636 | -0.0810 | 0.0432 | 0.0794 | 13.0744 | 0.7312 | -40.2655  |
| LargeArteryStroke | s_Eubacterium_hallii           | Weighted median           | 18 | 0.0854  | 0.0805 | 0.2886 | -0.0810 | 0.0432 | 0.0794 | 13.0744 | 0.7312 | -40.2655  |
| LargeArteryStroke | s_Eubacterium_hallii           | Inverse variance weighted | 18 | 0.0395  | 0.0579 | 0.4957 | -0.0810 | 0.0432 | 0.0794 | 13.0744 | 0.7312 | -40.2655  |
| LargeArteryStroke | s_Eubacterium_hallii           | Simple mode               | 18 | 0.1295  | 0.1370 | 0.3577 | -0.0810 | 0.0432 | 0.0794 | 13.0744 | 0.7312 | -40.2655  |
| LargeArteryStroke | s_Eubacterium_hallii           | Weighted mode             | 18 | 0.1203  | 0.1226 | 0.3401 | -0.0810 | 0.0432 | 0.0794 | 13.0744 | 0.7312 | -40.2655  |
| LargeArteryStroke | s_Eubacterium_limosum          | MR Egger                  | 18 | 0.1918  | 0.1824 | 0.3087 | -0.0536 | 0.0447 | 0.2480 | 23.8149 | 0.1246 | -34.9104  |
| LargeArteryStroke | s_Eubacterium_limosum          | Weighted median           | 18 | 0.0246  | 0.0741 | 0.7395 | -0.0536 | 0.0447 | 0.2480 | 23.8149 | 0.1246 | -34.9104  |
| LargeArteryStroke | s_Eubacterium_limosum          | Inverse variance weighted | 18 | -0.0148 | 0.0607 | 0.8073 | -0.0536 | 0.0447 | 0.2480 | 23.8149 | 0.1246 | -34.9104  |
| LargeArteryStroke | s_Eubacterium_limosum          | Simple mode               | 18 | 0.0554  | 0.1481 | 0.7132 | -0.0536 | 0.0447 | 0.2480 | 23.8149 | 0.1246 | -34.9104  |
| LargeArteryStroke | s_Eubacterium_limosum          | Weighted mode             | 18 | 0.0060  | 0.1285 | 0.9634 | -0.0536 | 0.0447 | 0.2480 | 23.8149 | 0.1246 | -34.9104  |
| LargeArteryStroke | s_Eubacterium_rectale          | MR Egger                  | 18 | 0.2096  | 0.2049 | 0.3216 | -0.0232 | 0.0503 | 0.6501 | 15.0619 | 0.5201 | -19.1853  |
| LargeArteryStroke | s_Eubacterium_rectale          | Weighted median           | 18 | 0.1304  | 0.0952 | 0.1706 | -0.0232 | 0.0503 | 0.6501 | 15.0619 | 0.5201 | -19.1853  |
| LargeArteryStroke | s_Eubacterium_rectale          | Inverse variance weighted | 18 | 0.1201  | 0.0673 | 0.0743 | -0.0232 | 0.0503 | 0.6501 | 15.0619 | 0.5201 | -19.1853  |
| LargeArteryStroke | s_Eubacterium_rectale          | Simple mode               | 18 | 0.1765  | 0.1810 | 0.3430 | -0.0232 | 0.0503 | 0.6501 | 15.0619 | 0.5201 | -19.1853  |
| LargeArteryStroke | s_Eubacterium_rectale          | Weighted mode             | 18 | 0.1396  | 0.1592 | 0.3927 | -0.0232 | 0.0503 | 0.6501 | 15.0619 | 0.5201 | -19.1853  |
| LargeArteryStroke | s_Eubacterium_saburreum        | MR Egger                  | 18 | -0.1435 | 0.2063 | 0.4968 | 0.0499  | 0.0506 | 0.3383 | 13.6038 | 0.6949 | -12.6082  |
| LargeArteryStroke | s_Eubacterium_saburreum        | Weighted median           | 18 | -0.0468 | 0.0924 | 0.6122 | 0.0499  | 0.0506 | 0.3383 | 13.6038 | 0.6949 | -12.6082  |
| LargeArteryStroke | s_Eubacterium_saburreum        | Inverse variance weighted | 18 | 0.0489  | 0.0677 | 0.4706 | 0.0499  | 0.0506 | 0.3383 | 13.6038 | 0.6949 | -12.6082  |
| LargeArteryStroke | s_Eubacterium_saburreum        | Simple mode               | 18 | -0.0990 | 0.1601 | 0.5446 | 0.0499  | 0.0506 | 0.3383 | 13.6038 | 0.6949 | -12.6082  |
| LargeArteryStroke | s_Eubacterium_saburreum        | Weighted mode             | 18 | -0.1140 | 0.1690 | 0.5092 | 0.0499  | 0.0506 | 0.3383 | 13.6038 | 0.6949 | -12.6082  |
| LargeArteryStroke | s_Eubacterium_siraeum          | MR Egger                  | 18 | 0.0837  | 0.2658 | 0.7568 | 0.0153  | 0.0652 | 0.8178 | 18.7058 | 0.2842 | -22.9171  |
| LargeArteryStroke | s_Eubacterium_siraeum          | Weighted median           | 18 | 0.1604  | 0.1174 | 0.1717 | 0.0153  | 0.0652 | 0.8178 | 18.7058 | 0.2842 | -22.9171  |
| LargeArteryStroke | s_Eubacterium_siraeum          | Inverse variance weighted | 18 | 0.1425  | 0.0848 | 0.0928 | 0.0153  | 0.0652 | 0.8178 | 18.7058 | 0.2842 | -22.9171  |
| LargeArteryStroke | s_Eubacterium_siraeum          | Simple mode               | 18 | 0.2749  | 0.2241 | 0.2366 | 0.0153  | 0.0652 | 0.8178 | 18.7058 | 0.2842 | -22.9171  |
| LargeArteryStroke | s_Eubacterium_siraeum          | Weighted mode             | 18 | 0.2023  | 0.2032 | 0.3334 | 0.0153  | 0.0652 | 0.8178 | 18.7058 | 0.2842 | -22.9171  |
| LargeArteryStroke | s_Eubacterium_ventriosum       | MR Egger                  | 18 | 0.3166  | 0.1722 | 0.0845 | -0.0569 | 0.0422 | 0.1968 | 17.2270 | 0.4391 | -44.8005  |
| LargeArteryStroke | s_Eubacterium_ventriosum       | Weighted median           | 18 | 0.1151  | 0.0796 | 0.1481 | -0.0569 | 0.0422 | 0.1968 | 17.2270 | 0.4391 | -44.8005  |
| LargeArteryStroke | s_Eubacterium_ventriosum       | Inverse variance weighted | 18 | 0.0976  | 0.0569 | 0.0863 | -0.0569 | 0.0422 | 0.1968 | 17.2270 | 0.4391 | -44.8005  |
| LargeArteryStroke | s_Eubacterium_ventriosum       | Simple mode               | 18 | 0.1108  | 0.1407 | 0.4418 | -0.0569 | 0.0422 | 0.1968 | 17.2270 | 0.4391 | -44.8005  |
| LargeArteryStroke | s_Eubacterium_ventriosum       | Weighted mode             | 18 | 0.1012  | 0.1364 | 0.4681 | -0.0569 | 0.0422 | 0.1968 | 17.2270 | 0.4391 | -44.8005  |
| LargeArteryStroke | s_Faecalibacterium_prausnitzii | MR Egger                  | 18 | 0.3869  | 0.1987 | 0.0693 | -0.1125 | 0.0487 | 0.0347 | 18.4529 | 0.3608 | -28.0299  |
| LargeArteryStroke | s_Faecalibacterium_prausnitzii | Weighted median           | 18 | 0.0197  | 0.0937 | 0.8334 | -0.1125 | 0.0487 | 0.0347 | 18.4529 | 0.3608 | -28.0299  |
| LargeArteryStroke | s_Faecalibacterium_prausnitzii | Inverse variance weighted | 18 | -0.0463 | 0.0680 | 0.4955 | -0.1125 | 0.0487 | 0.0347 | 18.4529 | 0.3608 | -28.0299  |
| LargeArteryStroke | s_Faecalibacterium_prausnitzii | Simple mode               | 18 | 0.0592  | 0.1748 | 0.7391 | -0.1125 | 0.0487 | 0.0347 | 18.4529 | 0.3608 | -28.0299  |
| LargeArteryStroke | s_Faecalibacterium_prausnitzii | Weighted mode             | 18 | 0.0592  | 0.1616 | 0.7188 | -0.1125 | 0.0487 | 0.0347 | 18.4529 | 0.3608 | -28.0299  |
| LargeArteryStroke | s_Gemella_sanguinis            | MR Egger                  | 18 | 0.2203  | 0.1881 | 0.2586 | -0.0816 | 0.0461 | 0.0960 | 6.9897  | 0.9837 | -145.3500 |
| LargeArteryStroke | s_Gemella_sanguinis            | Weighted median           | 18 | -0.0820 | 0.0784 | 0.2959 | -0.0816 | 0.0461 | 0.0960 | 6.9897  | 0.9837 | -145.3500 |

|                   |                                  |                           |    |         |        |        |         |        |        |         |        |           |
|-------------------|----------------------------------|---------------------------|----|---------|--------|--------|---------|--------|--------|---------|--------|-----------|
| LargeArteryStroke | s_Gemella_sanguinis              | Inverse variance weighted | 18 | -0.0940 | 0.0618 | 0.1282 | -0.0816 | 0.0461 | 0.0960 | 6.9897  | 0.9837 | -145.3500 |
| LargeArteryStroke | s_Gemella_sanguinis              | Simple mode               | 18 | -0.1085 | 0.1375 | 0.4412 | -0.0816 | 0.0461 | 0.0960 | 6.9897  | 0.9837 | -145.3500 |
| LargeArteryStroke | s_Gemella_sanguinis              | Weighted mode             | 18 | -0.0996 | 0.1357 | 0.4732 | -0.0816 | 0.0461 | 0.0960 | 6.9897  | 0.9837 | -145.3500 |
| LargeArteryStroke | s_Granulicatella_adiacens        | MR Egger                  | 18 | 0.1582  | 0.1490 | 0.3042 | -0.0548 | 0.0365 | 0.1533 | 13.4172 | 0.7078 | -85.4623  |
| LargeArteryStroke | s_Granulicatella_adiacens        | Weighted median           | 18 | -0.0638 | 0.0698 | 0.3604 | -0.0548 | 0.0365 | 0.1533 | 13.4172 | 0.7078 | -85.4623  |
| LargeArteryStroke | s_Granulicatella_adiacens        | Inverse variance weighted | 18 | -0.0528 | 0.0489 | 0.2803 | -0.0548 | 0.0365 | 0.1533 | 13.4172 | 0.7078 | -85.4623  |
| LargeArteryStroke | s_Granulicatella_adiacens        | Simple mode               | 18 | -0.1163 | 0.1279 | 0.3757 | -0.0548 | 0.0365 | 0.1533 | 13.4172 | 0.7078 | -85.4623  |
| LargeArteryStroke | s_Granulicatella_adiacens        | Weighted mode             | 18 | -0.0978 | 0.1204 | 0.4277 | -0.0548 | 0.0365 | 0.1533 | 13.4172 | 0.7078 | -85.4623  |
| LargeArteryStroke | s_Haemophilus_influenzae         | MR Egger                  | 18 | 0.0105  | 0.3146 | 0.9738 | -0.0194 | 0.0772 | 0.8045 | 12.6762 | 0.6963 | -5.6348   |
| LargeArteryStroke | s_Haemophilus_influenzae         | Weighted median           | 18 | -0.0041 | 0.1365 | 0.9761 | -0.0194 | 0.0772 | 0.8045 | 12.6762 | 0.6963 | -5.6348   |
| LargeArteryStroke | s_Haemophilus_influenzae         | Inverse variance weighted | 18 | -0.0643 | 0.1033 | 0.5338 | -0.0194 | 0.0772 | 0.8045 | 12.6762 | 0.6963 | -5.6348   |
| LargeArteryStroke | s_Haemophilus_influenzae         | Simple mode               | 18 | 0.1097  | 0.2288 | 0.6377 | -0.0194 | 0.0772 | 0.8045 | 12.6762 | 0.6963 | -5.6348   |
| LargeArteryStroke | s_Haemophilus_influenzae         | Weighted mode             | 18 | 0.0906  | 0.2126 | 0.6753 | -0.0194 | 0.0772 | 0.8045 | 12.6762 | 0.6963 | -5.6348   |
| LargeArteryStroke | s_Haemophilus_pittmaniae         | MR Egger                  | 18 | -0.1213 | 0.3168 | 0.7069 | 0.0071  | 0.0777 | 0.9284 | 9.7262  | 0.8805 | -6.7280   |
| LargeArteryStroke | s_Haemophilus_pittmaniae         | Weighted median           | 18 | -0.1180 | 0.1348 | 0.3814 | 0.0071  | 0.0777 | 0.9284 | 9.7262  | 0.8805 | -6.7280   |
| LargeArteryStroke | s_Haemophilus_pittmaniae         | Inverse variance weighted | 18 | -0.0940 | 0.1040 | 0.3664 | 0.0071  | 0.0777 | 0.9284 | 9.7262  | 0.8805 | -6.7280   |
| LargeArteryStroke | s_Haemophilus_pittmaniae         | Simple mode               | 18 | -0.1489 | 0.2284 | 0.5233 | 0.0071  | 0.0777 | 0.9284 | 9.7262  | 0.8805 | -6.7280   |
| LargeArteryStroke | s_Haemophilus_pittmaniae         | Weighted mode             | 18 | -0.1359 | 0.2054 | 0.5169 | 0.0071  | 0.0777 | 0.9284 | 9.7262  | 0.8805 | -6.7280   |
| LargeArteryStroke | s_Holdemania_filiformis          | MR Egger                  | 18 | -0.0628 | 0.1707 | 0.7178 | 0.0266  | 0.0419 | 0.5343 | 18.3255 | 0.3052 | -65.5506  |
| LargeArteryStroke | s_Holdemania_filiformis          | Weighted median           | 18 | 0.0885  | 0.0754 | 0.2402 | 0.0266  | 0.0419 | 0.5343 | 18.3255 | 0.3052 | -65.5506  |
| LargeArteryStroke | s_Holdemania_filiformis          | Inverse variance weighted | 18 | 0.0396  | 0.0551 | 0.4721 | 0.0266  | 0.0419 | 0.5343 | 18.3255 | 0.3052 | -65.5506  |
| LargeArteryStroke | s_Holdemania_filiformis          | Simple mode               | 18 | 0.1013  | 0.1418 | 0.4846 | 0.0266  | 0.0419 | 0.5343 | 18.3255 | 0.3052 | -65.5506  |
| LargeArteryStroke | s_Holdemania_filiformis          | Weighted mode             | 18 | 0.0844  | 0.1494 | 0.5796 | 0.0266  | 0.0419 | 0.5343 | 18.3255 | 0.3052 | -65.5506  |
| LargeArteryStroke | s_Klebsiella_oxytoca             | MR Egger                  | 18 | 0.2763  | 0.3858 | 0.4842 | -0.0959 | 0.0946 | 0.3259 | 24.5920 | 0.1042 | -2.3592   |
| LargeArteryStroke | s_Klebsiella_oxytoca             | Weighted median           | 18 | 0.0608  | 0.1568 | 0.6981 | -0.0959 | 0.0946 | 0.3259 | 24.5920 | 0.1042 | -2.3592   |
| LargeArteryStroke | s_Klebsiella_oxytoca             | Inverse variance weighted | 18 | -0.0930 | 0.1268 | 0.4633 | -0.0959 | 0.0946 | 0.3259 | 24.5920 | 0.1042 | -2.3592   |
| LargeArteryStroke | s_Klebsiella_oxytoca             | Simple mode               | 18 | 0.1864  | 0.2936 | 0.5341 | -0.0959 | 0.0946 | 0.3259 | 24.5920 | 0.1042 | -2.3592   |
| LargeArteryStroke | s_Klebsiella_oxytoca             | Weighted mode             | 18 | 0.1645  | 0.2722 | 0.5535 | -0.0959 | 0.0946 | 0.3259 | 24.5920 | 0.1042 | -2.3592   |
| LargeArteryStroke | s_Lachnospiraceae_oral_taxon_107 | MR Egger                  | 18 | 0.0685  | 0.1395 | 0.6300 | -0.0062 | 0.0342 | 0.8593 | 16.1932 | 0.4396 | -51.9094  |
| LargeArteryStroke | s_Lachnospiraceae_oral_taxon_107 | Weighted median           | 18 | 0.0496  | 0.0610 | 0.4161 | -0.0062 | 0.0342 | 0.8593 | 16.1932 | 0.4396 | -51.9094  |
| LargeArteryStroke | s_Lachnospiraceae_oral_taxon_107 | Inverse variance weighted | 18 | 0.0448  | 0.0455 | 0.3255 | -0.0062 | 0.0342 | 0.8593 | 16.1932 | 0.4396 | -51.9094  |
| LargeArteryStroke | s_Lachnospiraceae_oral_taxon_107 | Simple mode               | 18 | 0.0710  | 0.1086 | 0.5216 | -0.0062 | 0.0342 | 0.8593 | 16.1932 | 0.4396 | -51.9094  |
| LargeArteryStroke | s_Lachnospiraceae_oral_taxon_107 | Weighted mode             | 18 | 0.0681  | 0.1112 | 0.5485 | -0.0062 | 0.0342 | 0.8593 | 16.1932 | 0.4396 | -51.9094  |
| LargeArteryStroke | s_Lactobacillus_ruminis          | MR Egger                  | 18 | -0.0393 | 0.1755 | 0.8257 | 0.0109  | 0.0431 | 0.8028 | 16.9067 | 0.3917 | -15.0874  |
| LargeArteryStroke | s_Lactobacillus_ruminis          | Weighted median           | 18 | -0.0386 | 0.0729 | 0.5967 | 0.0109  | 0.0431 | 0.8028 | 16.9067 | 0.3917 | -15.0874  |
| LargeArteryStroke | s_Lactobacillus_ruminis          | Inverse variance weighted | 18 | 0.0028  | 0.0561 | 0.9602 | 0.0109  | 0.0431 | 0.8028 | 16.9067 | 0.3917 | -15.0874  |
| LargeArteryStroke | s_Lactobacillus_ruminis          | Simple mode               | 18 | 0.0051  | 0.1148 | 0.9653 | 0.0109  | 0.0431 | 0.8028 | 16.9067 | 0.3917 | -15.0874  |
| LargeArteryStroke | s_Lactobacillus_ruminis          | Weighted mode             | 18 | -0.0077 | 0.1104 | 0.9449 | 0.0109  | 0.0431 | 0.8028 | 16.9067 | 0.3917 | -15.0874  |
| LargeArteryStroke | s_Marvinbryantia_formatexigens   | MR Egger                  | 18 | 0.2502  | 0.1714 | 0.1638 | -0.0300 | 0.0420 | 0.4854 | 9.8494  | 0.8744 | -77.4966  |
| LargeArteryStroke | s_Marvinbryantia_formatexigens   | Weighted median           | 18 | 0.1136  | 0.0761 | 0.1353 | -0.0300 | 0.0420 | 0.4854 | 9.8494  | 0.8744 | -77.4966  |
| LargeArteryStroke | s_Marvinbryantia_formatexigens   | Inverse variance weighted | 18 | 0.1346  | 0.0563 | 0.0168 | -0.0300 | 0.0420 | 0.4854 | 9.8494  | 0.8744 | -77.4966  |
| LargeArteryStroke | s_Marvinbryantia_formatexigens   | Simple mode               | 18 | 0.2385  | 0.1368 | 0.0993 | -0.0300 | 0.0420 | 0.4854 | 9.8494  | 0.8744 | -77.4966  |
| LargeArteryStroke | s_Marvinbryantia_formatexigens   | Weighted mode             | 18 | 0.1468  | 0.1291 | 0.2711 | -0.0300 | 0.0420 | 0.4854 | 9.8494  | 0.8744 | -77.4966  |
| LargeArteryStroke | s_Megasphaera_elsdenii           | MR Egger                  | 18 | -0.3650 | 0.3765 | 0.3467 | 0.1492  | 0.0923 | 0.1255 | 16.1486 | 0.5133 | -11.2426  |
| LargeArteryStroke | s_Megasphaera_elsdenii           | Weighted median           | 18 | 0.3454  | 0.1746 | 0.0479 | 0.1492  | 0.0923 | 0.1255 | 16.1486 | 0.5133 | -11.2426  |
| LargeArteryStroke | s_Megasphaera_elsdenii           | Inverse variance weighted | 18 | 0.2099  | 0.1236 | 0.0895 | 0.1492  | 0.0923 | 0.1255 | 16.1486 | 0.5133 | -11.2426  |
| LargeArteryStroke | s_Megasphaera_elsdenii           | Simple mode               | 18 | 0.4594  | 0.3455 | 0.2012 | 0.1492  | 0.0923 | 0.1255 | 16.1486 | 0.5133 | -11.2426  |
| LargeArteryStroke | s_Megasphaera_elsdenii           | Weighted mode             | 18 | 0.4330  | 0.3005 | 0.1678 | 0.1492  | 0.0923 | 0.1255 | 16.1486 | 0.5133 | -11.2426  |
| LargeArteryStroke | s_Megasphaera_genomosp._type_1   | MR Egger                  | 18 | -0.0811 | 0.3541 | 0.8216 | 0.0489  | 0.0867 | 0.5803 | 20.4506 | 0.2006 | -0.2777   |
| LargeArteryStroke | s_Megasphaera_genomosp._type_1   | Weighted median           | 18 | -0.0036 | 0.1427 | 0.9799 | 0.0489  | 0.0867 | 0.5803 | 20.4506 | 0.2006 | -0.2777   |
| LargeArteryStroke | s_Megasphaera_genomosp._type_1   | Inverse variance weighted | 18 | 0.1077  | 0.1136 | 0.3432 | 0.0489  | 0.0867 | 0.5803 | 20.4506 | 0.2006 | -0.2777   |
| LargeArteryStroke | s_Megasphaera_genomosp._type_1   | Simple mode               | 18 | -0.0810 | 0.2161 | 0.7123 | 0.0489  | 0.0867 | 0.5803 | 20.4506 | 0.2006 | -0.2777   |
| LargeArteryStroke | s_Megasphaera_genomosp._type_1   | Weighted mode             | 18 | -0.0583 | 0.2076 | 0.7824 | 0.0489  | 0.0867 | 0.5803 | 20.4506 | 0.2006 | -0.2777   |
| LargeArteryStroke | s_Megasphaera_micronuciformis    | MR Egger                  | 18 | 0.0458  | 0.2023 | 0.8238 | -0.0167 | 0.0496 | 0.7414 | 8.4325  | 0.9349 | -68.4633  |
| LargeArteryStroke | s_Megasphaera_micronuciformis    | Weighted median           | 18 | -0.0574 | 0.0874 | 0.5112 | -0.0167 | 0.0496 | 0.7414 | 8.4325  | 0.9349 | -68.4633  |
| LargeArteryStroke | s_Megasphaera_micronuciformis    | Inverse variance weighted | 18 | -0.0184 | 0.0664 | 0.7823 | -0.0167 | 0.0496 | 0.7414 | 8.4325  | 0.9349 | -68.4633  |
| LargeArteryStroke | s_Megasphaera_micronuciformis    | Simple mode               | 18 | -0.0733 | 0.1468 | 0.6238 | -0.0167 | 0.0496 | 0.7414 | 8.4325  | 0.9349 | -68.4633  |
| LargeArteryStroke | s_Megasphaera_micronuciformis    | Weighted mode             | 18 | -0.0733 | 0.1438 | 0.6167 | -0.0167 | 0.0496 | 0.7414 | 8.4325  | 0.9349 | -68.4633  |
| LargeArteryStroke | s_Mitsuokella_multacida          | MR Egger                  | 18 | -0.0380 | 0.2932 | 0.8984 | 0.0511  | 0.0719 | 0.4876 | 12.4413 | 0.7131 | -30.0838  |
| LargeArteryStroke | s_Mitsuokella_multacida          | Weighted median           | 18 | 0.1932  | 0.1299 | 0.1370 | 0.0511  | 0.0719 | 0.4876 | 12.4413 | 0.7131 | -30.0838  |
| LargeArteryStroke | s_Mitsuokella_multacida          | Inverse variance weighted | 18 | 0.1588  | 0.0963 | 0.0992 | 0.0511  | 0.0719 | 0.4876 | 12.4413 | 0.7131 | -30.0838  |

|                   |                                       |                           |    |         |        |        |         |        |        |         |        |          |
|-------------------|---------------------------------------|---------------------------|----|---------|--------|--------|---------|--------|--------|---------|--------|----------|
| LargeArteryStroke | s_Mitsuokella_multacida               | Simple mode               | 18 | 0.2225  | 0.2322 | 0.3513 | 0.0511  | 0.0719 | 0.4876 | 12.4413 | 0.7131 | -30.0838 |
| LargeArteryStroke | s_Mitsuokella_multacida               | Weighted mode             | 18 | 0.2422  | 0.2272 | 0.3014 | 0.0511  | 0.0719 | 0.4876 | 12.4413 | 0.7131 | -30.0838 |
| LargeArteryStroke | s_Mobiluncus_curtisii                 | MR Egger                  | 18 | 0.4232  | 0.2229 | 0.0758 | -0.0637 | 0.0547 | 0.2609 | 14.7644 | 0.6124 | -7.1593  |
| LargeArteryStroke | s_Mobiluncus_curtisii                 | Weighted median           | 18 | 0.1360  | 0.1014 | 0.1800 | -0.0637 | 0.0547 | 0.2609 | 14.7644 | 0.6124 | -7.1593  |
| LargeArteryStroke | s_Mobiluncus_curtisii                 | Inverse variance weighted | 18 | 0.1778  | 0.0732 | 0.0152 | -0.0637 | 0.0547 | 0.2609 | 14.7644 | 0.6124 | -7.1593  |
| LargeArteryStroke | s_Mobiluncus_curtisii                 | Simple mode               | 18 | 0.1559  | 0.1577 | 0.3366 | -0.0637 | 0.0547 | 0.2609 | 14.7644 | 0.6124 | -7.1593  |
| LargeArteryStroke | s_Mobiluncus_curtisii                 | Weighted mode             | 18 | 0.1394  | 0.1655 | 0.4113 | -0.0637 | 0.0547 | 0.2609 | 14.7644 | 0.6124 | -7.1593  |
| LargeArteryStroke | s_Oribacterium_sinus                  | MR Egger                  | 18 | 0.0557  | 0.1205 | 0.6505 | -0.0177 | 0.0296 | 0.5580 | 6.5495  | 0.9810 | -95.8744 |
| LargeArteryStroke | s_Oribacterium_sinus                  | Weighted median           | 18 | 0.0016  | 0.0513 | 0.9754 | -0.0177 | 0.0296 | 0.5580 | 6.5495  | 0.9810 | -95.8744 |
| LargeArteryStroke | s_Oribacterium_sinus                  | Inverse variance weighted | 18 | -0.0125 | 0.0396 | 0.7529 | -0.0177 | 0.0296 | 0.5580 | 6.5495  | 0.9810 | -95.8744 |
| LargeArteryStroke | s_Oribacterium_sinus                  | Simple mode               | 18 | 0.0133  | 0.0860 | 0.8792 | -0.0177 | 0.0296 | 0.5580 | 6.5495  | 0.9810 | -95.8744 |
| LargeArteryStroke | s_Oribacterium_sinus                  | Weighted mode             | 18 | 0.0153  | 0.0771 | 0.8447 | -0.0177 | 0.0296 | 0.5580 | 6.5495  | 0.9810 | -95.8744 |
| LargeArteryStroke | s_Parabacteroides_distasonis          | MR Egger                  | 18 | -0.1180 | 0.1357 | 0.3972 | 0.0236  | 0.0333 | 0.4879 | 12.2954 | 0.7234 | -85.7586 |
| LargeArteryStroke | s_Parabacteroides_distasonis          | Weighted median           | 18 | 0.0247  | 0.0620 | 0.6907 | 0.0236  | 0.0333 | 0.4879 | 12.2954 | 0.7234 | -85.7586 |
| LargeArteryStroke | s_Parabacteroides_distasonis          | Inverse variance weighted | 18 | -0.0270 | 0.0446 | 0.5443 | 0.0236  | 0.0333 | 0.4879 | 12.2954 | 0.7234 | -85.7586 |
| LargeArteryStroke | s_Parabacteroides_distasonis          | Simple mode               | 18 | 0.0354  | 0.1017 | 0.7319 | 0.0236  | 0.0333 | 0.4879 | 12.2954 | 0.7234 | -85.7586 |
| LargeArteryStroke | s_Parabacteroides_distasonis          | Weighted mode             | 18 | 0.0263  | 0.1086 | 0.8114 | 0.0236  | 0.0333 | 0.4879 | 12.2954 | 0.7234 | -85.7586 |
| LargeArteryStroke | s_Parabacteroides_merdae              | MR Egger                  | 18 | -0.2655 | 0.2499 | 0.3038 | 0.0441  | 0.0613 | 0.4817 | 17.7925 | 0.3362 | -30.4760 |
| LargeArteryStroke | s_Parabacteroides_merdae              | Weighted median           | 18 | -0.0904 | 0.1149 | 0.4317 | 0.0441  | 0.0613 | 0.4817 | 17.7925 | 0.3362 | -30.4760 |
| LargeArteryStroke | s_Parabacteroides_merdae              | Inverse variance weighted | 18 | -0.0955 | 0.0809 | 0.2378 | 0.0441  | 0.0613 | 0.4817 | 17.7925 | 0.3362 | -30.4760 |
| LargeArteryStroke | s_Parabacteroides_merdae              | Simple mode               | 18 | -0.0841 | 0.2187 | 0.7053 | 0.0441  | 0.0613 | 0.4817 | 17.7925 | 0.3362 | -30.4760 |
| LargeArteryStroke | s_Parabacteroides_merdae              | Weighted mode             | 18 | -0.3162 | 0.2077 | 0.1462 | 0.0441  | 0.0613 | 0.4817 | 17.7925 | 0.3362 | -30.4760 |
| LargeArteryStroke | s_Parasutterella_excrementihominis    | MR Egger                  | 18 | -0.0590 | 0.4121 | 0.8880 | 0.0611  | 0.1011 | 0.5540 | 16.7446 | 0.4023 | -0.5133  |
| LargeArteryStroke | s_Parasutterella_excrementihominis    | Weighted median           | 18 | 0.0460  | 0.1959 | 0.8143 | 0.0611  | 0.1011 | 0.5540 | 16.7446 | 0.4023 | -0.5133  |
| LargeArteryStroke | s_Parasutterella_excrementihominis    | Inverse variance weighted | 18 | 0.1763  | 0.1328 | 0.1843 | 0.0611  | 0.1011 | 0.5540 | 16.7446 | 0.4023 | -0.5133  |
| LargeArteryStroke | s_Parasutterella_excrementihominis    | Simple mode               | 18 | 0.1768  | 0.3273 | 0.5961 | 0.0611  | 0.1011 | 0.5540 | 16.7446 | 0.4023 | -0.5133  |
| LargeArteryStroke | s_Parasutterella_excrementihominis    | Weighted mode             | 18 | 0.1548  | 0.3233 | 0.6382 | 0.0611  | 0.1011 | 0.5540 | 16.7446 | 0.4023 | -0.5133  |
| LargeArteryStroke | s_Peptoniphilus_lacrimalis            | MR Egger                  | 18 | -0.3432 | 0.3447 | 0.3342 | 0.1114  | 0.0845 | 0.2062 | 21.6943 | 0.1968 | -0.8387  |
| LargeArteryStroke | s_Peptoniphilus_lacrimalis            | Weighted median           | 18 | 0.1433  | 0.1433 | 0.3174 | 0.1114  | 0.0845 | 0.2062 | 21.6943 | 0.1968 | -0.8387  |
| LargeArteryStroke | s_Peptoniphilus_lacrimalis            | Inverse variance weighted | 18 | 0.0857  | 0.1156 | 0.4584 | 0.1114  | 0.0845 | 0.2062 | 21.6943 | 0.1968 | -0.8387  |
| LargeArteryStroke | s_Peptoniphilus_lacrimalis            | Simple mode               | 18 | 0.1662  | 0.2464 | 0.5091 | 0.1114  | 0.0845 | 0.2062 | 21.6943 | 0.1968 | -0.8387  |
| LargeArteryStroke | s_Peptoniphilus_lacrimalis            | Weighted mode             | 18 | 0.1578  | 0.2457 | 0.5293 | 0.1114  | 0.0845 | 0.2062 | 21.6943 | 0.1968 | -0.8387  |
| LargeArteryStroke | s_Peptostreptococcus_anaerobius       | MR Egger                  | 18 | 0.3576  | 0.2961 | 0.2448 | -0.0878 | 0.0726 | 0.2441 | 31.1322 | 0.0192 | -0.2517  |
| LargeArteryStroke | s_Peptostreptococcus_anaerobius       | Weighted median           | 18 | 0.0595  | 0.1024 | 0.5616 | -0.0878 | 0.0726 | 0.2441 | 31.1322 | 0.0192 | -0.2517  |
| LargeArteryStroke | s_Peptostreptococcus_anaerobius       | Inverse variance weighted | 18 | 0.0193  | 0.0986 | 0.8449 | -0.0878 | 0.0726 | 0.2441 | 31.1322 | 0.0192 | -0.2517  |
| LargeArteryStroke | s_Peptostreptococcus_anaerobius       | Simple mode               | 18 | 0.0475  | 0.1631 | 0.7742 | -0.0878 | 0.0726 | 0.2441 | 31.1322 | 0.0192 | -0.2517  |
| LargeArteryStroke | s_Peptostreptococcus_anaerobius       | Weighted mode             | 18 | 0.0569  | 0.1500 | 0.7090 | -0.0878 | 0.0726 | 0.2441 | 31.1322 | 0.0192 | -0.2517  |
| LargeArteryStroke | s_Peptostreptococcus_stomatidis       | MR Egger                  | 18 | 0.3716  | 0.2896 | 0.2177 | -0.1011 | 0.0710 | 0.1737 | 10.8739 | 0.8630 | -32.0047 |
| LargeArteryStroke | s_Peptostreptococcus_stomatidis       | Weighted median           | 18 | -0.0910 | 0.1293 | 0.4817 | -0.1011 | 0.0710 | 0.1737 | 10.8739 | 0.8630 | -32.0047 |
| LargeArteryStroke | s_Peptostreptococcus_stomatidis       | Inverse variance weighted | 18 | -0.0178 | 0.0951 | 0.8514 | -0.1011 | 0.0710 | 0.1737 | 10.8739 | 0.8630 | -32.0047 |
| LargeArteryStroke | s_Peptostreptococcus_stomatidis       | Simple mode               | 18 | -0.1225 | 0.2127 | 0.5722 | -0.1011 | 0.0710 | 0.1737 | 10.8739 | 0.8630 | -32.0047 |
| LargeArteryStroke | s_Peptostreptococcus_stomatidis       | Weighted mode             | 18 | -0.1267 | 0.2082 | 0.5510 | -0.1011 | 0.0710 | 0.1737 | 10.8739 | 0.8630 | -32.0047 |
| LargeArteryStroke | s_Phascolarctobacterium_succinatutens | MR Egger                  | 18 | 0.5245  | 0.2699 | 0.0698 | -0.1459 | 0.0662 | 0.0425 | 16.9323 | 0.4590 | -3.2102  |
| LargeArteryStroke | s_Phascolarctobacterium_succinatutens | Weighted median           | 18 | -0.0544 | 0.1215 | 0.6546 | -0.1459 | 0.0662 | 0.0425 | 16.9323 | 0.4590 | -3.2102  |
| LargeArteryStroke | s_Phascolarctobacterium_succinatutens | Inverse variance weighted | 18 | -0.0374 | 0.0887 | 0.6732 | -0.1459 | 0.0662 | 0.0425 | 16.9323 | 0.4590 | -3.2102  |
| LargeArteryStroke | s_Phascolarctobacterium_succinatutens | Simple mode               | 18 | -0.1060 | 0.2133 | 0.6255 | -0.1459 | 0.0662 | 0.0425 | 16.9323 | 0.4590 | -3.2102  |
| LargeArteryStroke | s_Phascolarctobacterium_succinatutens | Weighted mode             | 18 | -0.0797 | 0.1998 | 0.6949 | -0.1459 | 0.0662 | 0.0425 | 16.9323 | 0.4590 | -3.2102  |
| LargeArteryStroke | s_Porphyromonas_asaccharolytica       | MR Egger                  | 18 | -0.0519 | 0.2553 | 0.8414 | 0.0398  | 0.0626 | 0.5340 | 18.7249 | 0.2832 | -1.8592  |
| LargeArteryStroke | s_Porphyromonas_asaccharolytica       | Weighted median           | 18 | 0.0511  | 0.1091 | 0.6394 | 0.0398  | 0.0626 | 0.5340 | 18.7249 | 0.2832 | -1.8592  |
| LargeArteryStroke | s_Porphyromonas_asaccharolytica       | Inverse variance weighted | 18 | 0.1014  | 0.0824 | 0.2184 | 0.0398  | 0.0626 | 0.5340 | 18.7249 | 0.2832 | -1.8592  |
| LargeArteryStroke | s_Porphyromonas_asaccharolytica       | Simple mode               | 18 | -0.0353 | 0.1967 | 0.8596 | 0.0398  | 0.0626 | 0.5340 | 18.7249 | 0.2832 | -1.8592  |
| LargeArteryStroke | s_Porphyromonas_asaccharolytica       | Weighted mode             | 18 | -0.0057 | 0.1755 | 0.9743 | 0.0398  | 0.0626 | 0.5340 | 18.7249 | 0.2832 | -1.8592  |
| LargeArteryStroke | s_Prevotella_bergensis                | MR Egger                  | 18 | 0.0154  | 0.4417 | 0.9726 | 0.0122  | 0.1083 | 0.9115 | 15.6340 | 0.4788 | -12.1078 |
| LargeArteryStroke | s_Prevotella_bergensis                | Weighted median           | 18 | -0.0129 | 0.2119 | 0.9515 | 0.0122  | 0.1083 | 0.9115 | 15.6340 | 0.4788 | -12.1078 |
| LargeArteryStroke | s_Prevotella_bergensis                | Inverse variance weighted | 18 | 0.0626  | 0.1450 | 0.6662 | 0.0122  | 0.1083 | 0.9115 | 15.6340 | 0.4788 | -12.1078 |
| LargeArteryStroke | s_Prevotella_bergensis                | Simple mode               | 18 | 0.0154  | 0.3896 | 0.9689 | 0.0122  | 0.1083 | 0.9115 | 15.6340 | 0.4788 | -12.1078 |
| LargeArteryStroke | s_Prevotella_bergensis                | Weighted mode             | 18 | -0.0303 | 0.3853 | 0.9382 | 0.0122  | 0.1083 | 0.9115 | 15.6340 | 0.4788 | -12.1078 |
| LargeArteryStroke | s_Prevotella_bivia                    | MR Egger                  | 18 | -0.1229 | 0.3288 | 0.7136 | 0.0619  | 0.0806 | 0.4538 | 15.1131 | 0.5164 | -12.8207 |
| LargeArteryStroke | s_Prevotella_bivia                    | Weighted median           | 18 | 0.1844  | 0.1548 | 0.2335 | 0.0619  | 0.0806 | 0.4538 | 15.1131 | 0.5164 | -12.8207 |
| LargeArteryStroke | s_Prevotella_bivia                    | Inverse variance weighted | 18 | 0.1156  | 0.1080 | 0.2843 | 0.0619  | 0.0806 | 0.4538 | 15.1131 | 0.5164 | -12.8207 |
| LargeArteryStroke | s_Prevotella_bivia                    | Simple mode               | 18 | 0.4955  | 0.2740 | 0.0883 | 0.0619  | 0.0806 | 0.4538 | 15.1131 | 0.5164 | -12.8207 |

|                   |                                   |                           |    |         |        |        |         |        |        |         |        |           |
|-------------------|-----------------------------------|---------------------------|----|---------|--------|--------|---------|--------|--------|---------|--------|-----------|
| LargeArteryStroke | s_Prevotella_bivia                | Weighted mode             | 18 | 0.4156  | 0.2877 | 0.1667 | 0.0619  | 0.0806 | 0.4538 | 15.1131 | 0.5164 | -12.8207  |
| LargeArteryStroke | s_Prevotella_buccae               | MR Egger                  | 18 | -0.3195 | 0.3060 | 0.3119 | 0.1018  | 0.0750 | 0.1939 | 11.5745 | 0.8252 | -27.6552  |
| LargeArteryStroke | s_Prevotella_buccae               | Weighted median           | 18 | 0.0026  | 0.1380 | 0.9848 | 0.1018  | 0.0750 | 0.1939 | 11.5745 | 0.8252 | -27.6552  |
| LargeArteryStroke | s_Prevotella_buccae               | Inverse variance weighted | 18 | 0.0724  | 0.1005 | 0.4709 | 0.1018  | 0.0750 | 0.1939 | 11.5745 | 0.8252 | -27.6552  |
| LargeArteryStroke | s_Prevotella_buccae               | Simple mode               | 18 | -0.0375 | 0.2423 | 0.8787 | 0.1018  | 0.0750 | 0.1939 | 11.5745 | 0.8252 | -27.6552  |
| LargeArteryStroke | s_Prevotella_buccae               | Weighted mode             | 18 | -0.0498 | 0.2549 | 0.8475 | 0.1018  | 0.0750 | 0.1939 | 11.5745 | 0.8252 | -27.6552  |
| LargeArteryStroke | s_Prevotella_buccalis             | MR Egger                  | 18 | -0.1415 | 0.2523 | 0.5825 | 0.0342  | 0.0619 | 0.5875 | 12.6315 | 0.6995 | -45.5132  |
| LargeArteryStroke | s_Prevotella_buccalis             | Weighted median           | 18 | -0.0104 | 0.1174 | 0.9291 | 0.0342  | 0.0619 | 0.5875 | 12.6315 | 0.6995 | -45.5132  |
| LargeArteryStroke | s_Prevotella_buccalis             | Inverse variance weighted | 18 | -0.0096 | 0.0828 | 0.9074 | 0.0342  | 0.0619 | 0.5875 | 12.6315 | 0.6995 | -45.5132  |
| LargeArteryStroke | s_Prevotella_buccalis             | Simple mode               | 18 | -0.0767 | 0.2122 | 0.7221 | 0.0342  | 0.0619 | 0.5875 | 12.6315 | 0.6995 | -45.5132  |
| LargeArteryStroke | s_Prevotella_buccalis             | Weighted mode             | 18 | -0.0397 | 0.2022 | 0.8466 | 0.0342  | 0.0619 | 0.5875 | 12.6315 | 0.6995 | -45.5132  |
| LargeArteryStroke | s_Prevotella_copri                | MR Egger                  | 18 | -0.1068 | 0.5345 | 0.8442 | 0.0226  | 0.1311 | 0.8651 | 16.3748 | 0.4271 | -0.2498   |
| LargeArteryStroke | s_Prevotella_copri                | Weighted median           | 18 | -0.0357 | 0.2495 | 0.8861 | 0.0226  | 0.1311 | 0.8651 | 16.3748 | 0.4271 | -0.2498   |
| LargeArteryStroke | s_Prevotella_copri                | Inverse variance weighted | 18 | -0.0196 | 0.1735 | 0.9099 | 0.0226  | 0.1311 | 0.8651 | 16.3748 | 0.4271 | -0.2498   |
| LargeArteryStroke | s_Prevotella_copri                | Simple mode               | 18 | -0.6604 | 0.4823 | 0.1888 | 0.0226  | 0.1311 | 0.8651 | 16.3748 | 0.4271 | -0.2498   |
| LargeArteryStroke | s_Prevotella_copri                | Weighted mode             | 18 | -0.5967 | 0.4974 | 0.2467 | 0.0226  | 0.1311 | 0.8651 | 16.3748 | 0.4271 | -0.2498   |
| LargeArteryStroke | s_Prevotella_denticola            | MR Egger                  | 18 | 0.2090  | 0.5205 | 0.6933 | -0.0648 | 0.1276 | 0.6188 | 19.1319 | 0.2619 | -5.2997   |
| LargeArteryStroke | s_Prevotella_denticola            | Weighted median           | 18 | -0.0727 | 0.2205 | 0.7417 | -0.0648 | 0.1276 | 0.6188 | 19.1319 | 0.2619 | -5.2997   |
| LargeArteryStroke | s_Prevotella_denticola            | Inverse variance weighted | 18 | -0.0404 | 0.1671 | 0.8089 | -0.0648 | 0.1276 | 0.6188 | 19.1319 | 0.2619 | -5.2997   |
| LargeArteryStroke | s_Prevotella_denticola            | Simple mode               | 18 | -0.1263 | 0.3612 | 0.7309 | -0.0648 | 0.1276 | 0.6188 | 19.1319 | 0.2619 | -5.2997   |
| LargeArteryStroke | s_Prevotella_denticola            | Weighted mode             | 18 | -0.0873 | 0.3683 | 0.8154 | -0.0648 | 0.1276 | 0.6188 | 19.1319 | 0.2619 | -5.2997   |
| LargeArteryStroke | s_Prevotella_disiens              | MR Egger                  | 18 | -0.0192 | 0.1650 | 0.9086 | 0.0055  | 0.0405 | 0.8945 | 16.3693 | 0.4275 | -27.8346  |
| LargeArteryStroke | s_Prevotella_disiens              | Weighted median           | 18 | 0.0120  | 0.0728 | 0.8693 | 0.0055  | 0.0405 | 0.8945 | 16.3693 | 0.4275 | -27.8346  |
| LargeArteryStroke | s_Prevotella_disiens              | Inverse variance weighted | 18 | 0.0018  | 0.0536 | 0.9736 | 0.0055  | 0.0405 | 0.8945 | 16.3693 | 0.4275 | -27.8346  |
| LargeArteryStroke | s_Prevotella_disiens              | Simple mode               | 18 | 0.0196  | 0.1111 | 0.8622 | 0.0055  | 0.0405 | 0.8945 | 16.3693 | 0.4275 | -27.8346  |
| LargeArteryStroke | s_Prevotella_disiens              | Weighted mode             | 18 | 0.0105  | 0.1185 | 0.9302 | 0.0055  | 0.0405 | 0.8945 | 16.3693 | 0.4275 | -27.8346  |
| LargeArteryStroke | s_Prevotella_oris                 | MR Egger                  | 18 | -0.0807 | 0.1533 | 0.6058 | 0.0216  | 0.0376 | 0.5743 | 13.0633 | 0.6681 | -75.1293  |
| LargeArteryStroke | s_Prevotella_oris                 | Weighted median           | 18 | 0.0049  | 0.0671 | 0.9420 | 0.0216  | 0.0376 | 0.5743 | 13.0633 | 0.6681 | -75.1293  |
| LargeArteryStroke | s_Prevotella_oris                 | Inverse variance weighted | 18 | 0.0023  | 0.0503 | 0.9629 | 0.0216  | 0.0376 | 0.5743 | 13.0633 | 0.6681 | -75.1293  |
| LargeArteryStroke | s_Prevotella_oris                 | Simple mode               | 18 | 0.0603  | 0.1233 | 0.6310 | 0.0216  | 0.0376 | 0.5743 | 13.0633 | 0.6681 | -75.1293  |
| LargeArteryStroke | s_Prevotella_oris                 | Weighted mode             | 18 | 0.0470  | 0.1239 | 0.7091 | 0.0216  | 0.0376 | 0.5743 | 13.0633 | 0.6681 | -75.1293  |
| LargeArteryStroke | s_Prevotella_tannerae             | MR Egger                  | 18 | 0.1783  | 0.2376 | 0.4639 | -0.0223 | 0.0583 | 0.7066 | 7.6915  | 0.9575 | -56.7408  |
| LargeArteryStroke | s_Prevotella_tannerae             | Weighted median           | 18 | 0.1142  | 0.0982 | 0.2446 | -0.0223 | 0.0583 | 0.7066 | 7.6915  | 0.9575 | -56.7408  |
| LargeArteryStroke | s_Prevotella_tannerae             | Inverse variance weighted | 18 | 0.0923  | 0.0780 | 0.2368 | -0.0223 | 0.0583 | 0.7066 | 7.6915  | 0.9575 | -56.7408  |
| LargeArteryStroke | s_Prevotella_tannerae             | Simple mode               | 18 | 0.0574  | 0.1765 | 0.7488 | -0.0223 | 0.0583 | 0.7066 | 7.6915  | 0.9575 | -56.7408  |
| LargeArteryStroke | s_Prevotella_tannerae             | Weighted mode             | 18 | 0.0785  | 0.1623 | 0.6350 | -0.0223 | 0.0583 | 0.7066 | 7.6915  | 0.9575 | -56.7408  |
| LargeArteryStroke | s_Prevotella_timonensis           | MR Egger                  | 18 | 0.0904  | 0.2008 | 0.6585 | -0.0197 | 0.0492 | 0.6941 | 19.7128 | 0.2334 | -17.3675  |
| LargeArteryStroke | s_Prevotella_timonensis           | Weighted median           | 18 | 0.0549  | 0.0804 | 0.4949 | -0.0197 | 0.0492 | 0.6941 | 19.7128 | 0.2334 | -17.3675  |
| LargeArteryStroke | s_Prevotella_timonensis           | Inverse variance weighted | 18 | 0.0145  | 0.0643 | 0.8220 | -0.0197 | 0.0492 | 0.6941 | 19.7128 | 0.2334 | -17.3675  |
| LargeArteryStroke | s_Prevotella_timonensis           | Simple mode               | 18 | -0.1074 | 0.1641 | 0.5215 | -0.0197 | 0.0492 | 0.6941 | 19.7128 | 0.2334 | -17.3675  |
| LargeArteryStroke | s_Prevotella_timonensis           | Weighted mode             | 18 | 0.1452  | 0.1526 | 0.3546 | -0.0197 | 0.0492 | 0.6941 | 19.7128 | 0.2334 | -17.3675  |
| LargeArteryStroke | s_Providencia_rettgeri            | MR Egger                  | 18 | 0.5036  | 0.3424 | 0.1607 | -0.1222 | 0.0840 | 0.1648 | 27.9762 | 0.0452 | -6.0822   |
| LargeArteryStroke | s_Providencia_rettgeri            | Weighted median           | 18 | 0.0276  | 0.1385 | 0.8419 | -0.1222 | 0.0840 | 0.1648 | 27.9762 | 0.0452 | -6.0822   |
| LargeArteryStroke | s_Providencia_rettgeri            | Inverse variance weighted | 18 | 0.0328  | 0.1160 | 0.7772 | -0.1222 | 0.0840 | 0.1648 | 27.9762 | 0.0452 | -6.0822   |
| LargeArteryStroke | s_Providencia_rettgeri            | Simple mode               | 18 | -0.1384 | 0.2510 | 0.5885 | -0.1222 | 0.0840 | 0.1648 | 27.9762 | 0.0452 | -6.0822   |
| LargeArteryStroke | s_Providencia_rettgeri            | Weighted mode             | 18 | -0.0509 | 0.2564 | 0.8450 | -0.1222 | 0.0840 | 0.1648 | 27.9762 | 0.0452 | -6.0822   |
| LargeArteryStroke | s_Pseudoflavonifractor_capillosus | MR Egger                  | 18 | 0.0644  | 0.1273 | 0.6199 | -0.0134 | 0.0312 | 0.6732 | 16.1553 | 0.4422 | -137.5535 |
| LargeArteryStroke | s_Pseudoflavonifractor_capillosus | Weighted median           | 18 | 0.0258  | 0.0591 | 0.6622 | -0.0134 | 0.0312 | 0.6732 | 16.1553 | 0.4422 | -137.5535 |
| LargeArteryStroke | s_Pseudoflavonifractor_capillosus | Inverse variance weighted | 18 | 0.0127  | 0.0416 | 0.7597 | -0.0134 | 0.0312 | 0.6732 | 16.1553 | 0.4422 | -137.5535 |
| LargeArteryStroke | s_Pseudoflavonifractor_capillosus | Simple mode               | 18 | 0.0869  | 0.1058 | 0.4229 | -0.0134 | 0.0312 | 0.6732 | 16.1553 | 0.4422 | -137.5535 |
| LargeArteryStroke | s_Pseudoflavonifractor_capillosus | Weighted mode             | 18 | 0.0388  | 0.0950 | 0.6883 | -0.0134 | 0.0312 | 0.6732 | 16.1553 | 0.4422 | -137.5535 |
| LargeArteryStroke | s_Roseburia_intestinalis          | MR Egger                  | 18 | 0.0668  | 0.2221 | 0.7676 | -0.0079 | 0.0545 | 0.8866 | 16.1839 | 0.4402 | -46.5252  |
| LargeArteryStroke | s_Roseburia_intestinalis          | Weighted median           | 18 | 0.0208  | 0.1015 | 0.8379 | -0.0079 | 0.0545 | 0.8866 | 16.1839 | 0.4402 | -46.5252  |
| LargeArteryStroke | s_Roseburia_intestinalis          | Inverse variance weighted | 18 | 0.0364  | 0.0725 | 0.6160 | -0.0079 | 0.0545 | 0.8866 | 16.1839 | 0.4402 | -46.5252  |
| LargeArteryStroke | s_Roseburia_intestinalis          | Simple mode               | 18 | 0.0397  | 0.2000 | 0.8449 | -0.0079 | 0.0545 | 0.8866 | 16.1839 | 0.4402 | -46.5252  |
| LargeArteryStroke | s_Roseburia_intestinalis          | Weighted mode             | 18 | 0.0470  | 0.1852 | 0.8028 | -0.0079 | 0.0545 | 0.8866 | 16.1839 | 0.4402 | -46.5252  |
| LargeArteryStroke | s_Ruminococcus_albus              | MR Egger                  | 18 | 0.0661  | 0.3580 | 0.8559 | 0.0201  | 0.0878 | 0.8217 | 22.7470 | 0.1207 | -2.1830   |
| LargeArteryStroke | s_Ruminococcus_albus              | Weighted median           | 18 | 0.0857  | 0.1532 | 0.5756 | 0.0201  | 0.0878 | 0.8217 | 22.7470 | 0.1207 | -2.1830   |
| LargeArteryStroke | s_Ruminococcus_albus              | Inverse variance weighted | 18 | 0.1435  | 0.1142 | 0.2090 | 0.0201  | 0.0878 | 0.8217 | 22.7470 | 0.1207 | -2.1830   |
| LargeArteryStroke | s_Ruminococcus_albus              | Simple mode               | 18 | -0.1231 | 0.2801 | 0.6658 | 0.0201  | 0.0878 | 0.8217 | 22.7470 | 0.1207 | -2.1830   |
| LargeArteryStroke | s_Ruminococcus_albus              | Weighted mode             | 18 | -0.1555 | 0.2816 | 0.5881 | 0.0201  | 0.0878 | 0.8217 | 22.7470 | 0.1207 | -2.1830   |

|                   |                                |                           |    |         |        |        |         |        |        |         |        |           |
|-------------------|--------------------------------|---------------------------|----|---------|--------|--------|---------|--------|--------|---------|--------|-----------|
| LargeArteryStroke | s_Ruminococcus_bromii          | MR Egger                  | 18 | 0.2283  | 0.3718 | 0.5479 | -0.0122 | 0.0912 | 0.8952 | 19.2770 | 0.2546 | -0.3989   |
| LargeArteryStroke | s_Ruminococcus_bromii          | Weighted median           | 18 | 0.1318  | 0.1544 | 0.3935 | -0.0122 | 0.0912 | 0.8952 | 19.2770 | 0.2546 | -0.3989   |
| LargeArteryStroke | s_Ruminococcus_bromii          | Inverse variance weighted | 18 | 0.1813  | 0.1185 | 0.1263 | -0.0122 | 0.0912 | 0.8952 | 19.2770 | 0.2546 | -0.3989   |
| LargeArteryStroke | s_Ruminococcus_bromii          | Simple mode               | 18 | 0.0924  | 0.2372 | 0.7018 | -0.0122 | 0.0912 | 0.8952 | 19.2770 | 0.2546 | -0.3989   |
| LargeArteryStroke | s_Ruminococcus_bromii          | Weighted mode             | 18 | -0.0275 | 0.2377 | 0.9092 | -0.0122 | 0.0912 | 0.8952 | 19.2770 | 0.2546 | -0.3989   |
| LargeArteryStroke | s_Ruminococcus_champanellensis | MR Egger                  | 18 | 0.1768  | 0.3156 | 0.5831 | -0.0094 | 0.0774 | 0.9051 | 10.7837 | 0.8226 | -8.4143   |
| LargeArteryStroke | s_Ruminococcus_champanellensis | Weighted median           | 18 | 0.0729  | 0.1445 | 0.6142 | -0.0094 | 0.0774 | 0.9051 | 10.7837 | 0.8226 | -8.4143   |
| LargeArteryStroke | s_Ruminococcus_champanellensis | Inverse variance weighted | 18 | 0.1407  | 0.1037 | 0.1746 | -0.0094 | 0.0774 | 0.9051 | 10.7837 | 0.8226 | -8.4143   |
| LargeArteryStroke | s_Ruminococcus_champanellensis | Simple mode               | 18 | 0.0435  | 0.2522 | 0.8652 | -0.0094 | 0.0774 | 0.9051 | 10.7837 | 0.8226 | -8.4143   |
| LargeArteryStroke | s_Ruminococcus_champanellensis | Weighted mode             | 18 | 0.0384  | 0.2583 | 0.8837 | -0.0094 | 0.0774 | 0.9051 | 10.7837 | 0.8226 | -8.4143   |
| LargeArteryStroke | s_Ruminococcus_gnavus          | MR Egger                  | 18 | 0.1485  | 0.2004 | 0.4694 | -0.0312 | 0.0491 | 0.5349 | 11.9950 | 0.7443 | NA        |
| LargeArteryStroke | s_Ruminococcus_gnavus          | Weighted median           | 18 | -0.0766 | 0.0906 | 0.3982 | -0.0312 | 0.0491 | 0.5349 | 11.9950 | 0.7443 | NA        |
| LargeArteryStroke | s_Ruminococcus_gnavus          | Inverse variance weighted | 18 | 0.0285  | 0.0658 | 0.6652 | -0.0312 | 0.0491 | 0.5349 | 11.9950 | 0.7443 | NA        |
| LargeArteryStroke | s_Ruminococcus_gnavus          | Simple mode               | 18 | -0.1076 | 0.1659 | 0.5254 | -0.0312 | 0.0491 | 0.5349 | 11.9950 | 0.7443 | NA        |
| LargeArteryStroke | s_Ruminococcus_gnavus          | Weighted mode             | 18 | -0.1128 | 0.1593 | 0.4887 | -0.0312 | 0.0491 | 0.5349 | 11.9950 | 0.7443 | NA        |
| LargeArteryStroke | s_Ruminococcus_lactaris        | MR Egger                  | 18 | 0.1579  | 0.1962 | 0.4327 | -0.0181 | 0.0481 | 0.7110 | 5.3932  | 0.9934 | -125.0474 |
| LargeArteryStroke | s_Ruminococcus_lactaris        | Weighted median           | 18 | 0.0475  | 0.0854 | 0.5779 | -0.0181 | 0.0481 | 0.7110 | 5.3932  | 0.9934 | -125.0474 |
| LargeArteryStroke | s_Ruminococcus_lactaris        | Inverse variance weighted | 18 | 0.0880  | 0.0644 | 0.1720 | -0.0181 | 0.0481 | 0.7110 | 5.3932  | 0.9934 | -125.0474 |
| LargeArteryStroke | s_Ruminococcus_lactaris        | Simple mode               | 18 | 0.0019  | 0.1397 | 0.9892 | -0.0181 | 0.0481 | 0.7110 | 5.3932  | 0.9934 | -125.0474 |
| LargeArteryStroke | s_Ruminococcus_lactaris        | Weighted mode             | 18 | 0.0143  | 0.1381 | 0.9190 | -0.0181 | 0.0481 | 0.7110 | 5.3932  | 0.9934 | -125.0474 |
| LargeArteryStroke | s_Ruminococcus_obeum           | MR Egger                  | 18 | 0.2009  | 0.1121 | 0.0921 | -0.0366 | 0.0275 | 0.2019 | 13.1408 | 0.7267 | NA        |
| LargeArteryStroke | s_Ruminococcus_obeum           | Weighted median           | 18 | 0.0588  | 0.0467 | 0.2077 | -0.0366 | 0.0275 | 0.2019 | 13.1408 | 0.7267 | NA        |
| LargeArteryStroke | s_Ruminococcus_obeum           | Inverse variance weighted | 18 | 0.0600  | 0.0368 | 0.1034 | -0.0366 | 0.0275 | 0.2019 | 13.1408 | 0.7267 | NA        |
| LargeArteryStroke | s_Ruminococcus_obeum           | Simple mode               | 18 | 0.0792  | 0.0868 | 0.3743 | -0.0366 | 0.0275 | 0.2019 | 13.1408 | 0.7267 | NA        |
| LargeArteryStroke | s_Ruminococcus_obeum           | Weighted mode             | 18 | 0.0679  | 0.0796 | 0.4051 | -0.0366 | 0.0275 | 0.2019 | 13.1408 | 0.7267 | NA        |
| LargeArteryStroke | s_Ruminococcus_torques         | MR Egger                  | 18 | 0.1252  | 0.1336 | 0.3628 | -0.0285 | 0.0328 | 0.3976 | 13.5604 | 0.6314 | NA        |
| LargeArteryStroke | s_Ruminococcus_torques         | Weighted median           | 18 | -0.0064 | 0.0628 | 0.9194 | -0.0285 | 0.0328 | 0.3976 | 13.5604 | 0.6314 | NA        |
| LargeArteryStroke | s_Ruminococcus_torques         | Inverse variance weighted | 18 | 0.0155  | 0.0439 | 0.7243 | -0.0285 | 0.0328 | 0.3976 | 13.5604 | 0.6314 | NA        |
| LargeArteryStroke | s_Ruminococcus_torques         | Simple mode               | 18 | -0.0716 | 0.1171 | 0.5493 | -0.0285 | 0.0328 | 0.3976 | 13.5604 | 0.6314 | NA        |
| LargeArteryStroke | s_Ruminococcus_torques         | Weighted mode             | 18 | -0.0497 | 0.1203 | 0.6843 | -0.0285 | 0.0328 | 0.3976 | 13.5604 | 0.6314 | NA        |
| LargeArteryStroke | s_Salmonella_enterica          | MR Egger                  | 18 | 0.4737  | 0.3765 | 0.2263 | -0.1216 | 0.0923 | 0.2064 | 32.7551 | 0.0121 | -2.0793   |
| LargeArteryStroke | s_Salmonella_enterica          | Weighted median           | 18 | 0.0432  | 0.1452 | 0.7658 | -0.1216 | 0.0923 | 0.2064 | 32.7551 | 0.0121 | -2.0793   |
| LargeArteryStroke | s_Salmonella_enterica          | Inverse variance weighted | 18 | 0.0055  | 0.1262 | 0.9653 | -0.1216 | 0.0923 | 0.2064 | 32.7551 | 0.0121 | -2.0793   |
| LargeArteryStroke | s_Salmonella_enterica          | Simple mode               | 18 | -0.0301 | 0.2817 | 0.9160 | -0.1216 | 0.0923 | 0.2064 | 32.7551 | 0.0121 | -2.0793   |
| LargeArteryStroke | s_Salmonella_enterica          | Weighted mode             | 18 | 0.0189  | 0.2433 | 0.9391 | -0.1216 | 0.0923 | 0.2064 | 32.7551 | 0.0121 | -2.0793   |
| LargeArteryStroke | s_Streptococcus_anginosus      | MR Egger                  | 18 | 0.2435  | 0.2767 | 0.3917 | -0.0654 | 0.0678 | 0.3493 | 23.5799 | 0.1313 | -3.5598   |
| LargeArteryStroke | s_Streptococcus_anginosus      | Weighted median           | 18 | 0.0733  | 0.1045 | 0.4834 | -0.0654 | 0.0678 | 0.3493 | 23.5799 | 0.1313 | -3.5598   |
| LargeArteryStroke | s_Streptococcus_anginosus      | Inverse variance weighted | 18 | -0.0084 | 0.0907 | 0.9259 | -0.0654 | 0.0678 | 0.3493 | 23.5799 | 0.1313 | -3.5598   |
| LargeArteryStroke | s_Streptococcus_anginosus      | Simple mode               | 18 | 0.0892  | 0.1690 | 0.6043 | -0.0654 | 0.0678 | 0.3493 | 23.5799 | 0.1313 | -3.5598   |
| LargeArteryStroke | s_Streptococcus_anginosus      | Weighted mode             | 18 | 0.0962  | 0.1509 | 0.5324 | -0.0654 | 0.0678 | 0.3493 | 23.5799 | 0.1313 | -3.5598   |
| LargeArteryStroke | s_Streptococcus_australis      | MR Egger                  | 18 | -0.0297 | 0.1985 | 0.8828 | -0.0303 | 0.0487 | 0.5426 | 13.1366 | 0.6627 | -28.7842  |
| LargeArteryStroke | s_Streptococcus_australis      | Weighted median           | 18 | -0.1511 | 0.0920 | 0.1007 | -0.0303 | 0.0487 | 0.5426 | 13.1366 | 0.6627 | -28.7842  |
| LargeArteryStroke | s_Streptococcus_australis      | Inverse variance weighted | 18 | -0.1464 | 0.0652 | 0.0247 | -0.0303 | 0.0487 | 0.5426 | 13.1366 | 0.6627 | -28.7842  |
| LargeArteryStroke | s_Streptococcus_australis      | Simple mode               | 18 | -0.2213 | 0.1593 | 0.1827 | -0.0303 | 0.0487 | 0.5426 | 13.1366 | 0.6627 | -28.7842  |
| LargeArteryStroke | s_Streptococcus_australis      | Weighted mode             | 18 | -0.1775 | 0.1424 | 0.2293 | -0.0303 | 0.0487 | 0.5426 | 13.1366 | 0.6627 | -28.7842  |
| LargeArteryStroke | s_Streptococcus_dysgalactiae   | MR Egger                  | 18 | 0.0244  | 0.1266 | 0.8495 | 0.0103  | 0.0310 | 0.7435 | 12.3462 | 0.7198 | -172.5556 |
| LargeArteryStroke | s_Streptococcus_dysgalactiae   | Weighted median           | 18 | 0.0255  | 0.0571 | 0.6558 | 0.0103  | 0.0310 | 0.7435 | 12.3462 | 0.7198 | -172.5556 |
| LargeArteryStroke | s_Streptococcus_dysgalactiae   | Inverse variance weighted | 18 | 0.0642  | 0.0416 | 0.1223 | 0.0103  | 0.0310 | 0.7435 | 12.3462 | 0.7198 | -172.5556 |
| LargeArteryStroke | s_Streptococcus_dysgalactiae   | Simple mode               | 18 | 0.0075  | 0.1100 | 0.9464 | 0.0103  | 0.0310 | 0.7435 | 12.3462 | 0.7198 | -172.5556 |
| LargeArteryStroke | s_Streptococcus_dysgalactiae   | Weighted mode             | 18 | -0.0015 | 0.1008 | 0.9881 | 0.0103  | 0.0310 | 0.7435 | 12.3462 | 0.7198 | -172.5556 |
| LargeArteryStroke | s_Streptococcus_gallolyticus   | MR Egger                  | 18 | 0.2245  | 0.2338 | 0.3512 | -0.0480 | 0.0573 | 0.4145 | 13.5507 | 0.6321 | -38.7905  |
| LargeArteryStroke | s_Streptococcus_gallolyticus   | Weighted median           | 18 | 0.0249  | 0.1095 | 0.8202 | -0.0480 | 0.0573 | 0.4145 | 13.5507 | 0.6321 | -38.7905  |
| LargeArteryStroke | s_Streptococcus_gallolyticus   | Inverse variance weighted | 18 | 0.0395  | 0.0768 | 0.6068 | -0.0480 | 0.0573 | 0.4145 | 13.5507 | 0.6321 | -38.7905  |
| LargeArteryStroke | s_Streptococcus_gallolyticus   | Simple mode               | 18 | -0.0477 | 0.1892 | 0.8041 | -0.0480 | 0.0573 | 0.4145 | 13.5507 | 0.6321 | -38.7905  |
| LargeArteryStroke | s_Streptococcus_gallolyticus   | Weighted mode             | 18 | -0.0589 | 0.1894 | 0.7596 | -0.0480 | 0.0573 | 0.4145 | 13.5507 | 0.6321 | -38.7905  |
| LargeArteryStroke | s_Streptococcus_gordonii       | MR Egger                  | 18 | 0.0844  | 0.2014 | 0.6807 | -0.0483 | 0.0494 | 0.3430 | 15.1017 | 0.5172 | -27.8749  |
| LargeArteryStroke | s_Streptococcus_gordonii       | Weighted median           | 18 | -0.1786 | 0.0883 | 0.0433 | -0.0483 | 0.0494 | 0.3430 | 15.1017 | 0.5172 | -27.8749  |
| LargeArteryStroke | s_Streptococcus_gordonii       | Inverse variance weighted | 18 | -0.1015 | 0.0661 | 0.1248 | -0.0483 | 0.0494 | 0.3430 | 15.1017 | 0.5172 | -27.8749  |
| LargeArteryStroke | s_Streptococcus_gordonii       | Simple mode               | 18 | -0.2399 | 0.1702 | 0.1766 | -0.0483 | 0.0494 | 0.3430 | 15.1017 | 0.5172 | -27.8749  |
| LargeArteryStroke | s_Streptococcus_gordonii       | Weighted mode             | 18 | -0.2259 | 0.1591 | 0.1737 | -0.0483 | 0.0494 | 0.3430 | 15.1017 | 0.5172 | -27.8749  |
| LargeArteryStroke | s_Streptococcus_infantarius    | MR Egger                  | 18 | 0.2416  | 0.3051 | 0.4401 | -0.0932 | 0.0748 | 0.2307 | 12.7636 | 0.7519 | -21.4162  |

|                   |                               |                           |    |         |        |        |         |        |        |         |        |          |
|-------------------|-------------------------------|---------------------------|----|---------|--------|--------|---------|--------|--------|---------|--------|----------|
| LargeArteryStroke | s_Streptococcus_infantarius   | Weighted median           | 18 | -0.0780 | 0.1402 | 0.5779 | -0.0932 | 0.0748 | 0.2307 | 12.7636 | 0.7519 | -21.4162 |
| LargeArteryStroke | s_Streptococcus_infantarius   | Inverse variance weighted | 18 | -0.1175 | 0.1002 | 0.2408 | -0.0932 | 0.0748 | 0.2307 | 12.7636 | 0.7519 | -21.4162 |
| LargeArteryStroke | s_Streptococcus_infantarius   | Simple mode               | 18 | -0.1129 | 0.2273 | 0.6258 | -0.0932 | 0.0748 | 0.2307 | 12.7636 | 0.7519 | -21.4162 |
| LargeArteryStroke | s_Streptococcus_infantarius   | Weighted mode             | 18 | -0.0881 | 0.2246 | 0.6996 | -0.0932 | 0.0748 | 0.2307 | 12.7636 | 0.7519 | -21.4162 |
| LargeArteryStroke | s_Streptococcus_infantis      | MR Egger                  | 18 | 0.0593  | 0.1664 | 0.7260 | -0.0402 | 0.0408 | 0.3394 | 13.7495 | 0.6847 | -50.9258 |
| LargeArteryStroke | s_Streptococcus_infantis      | Weighted median           | 18 | -0.0899 | 0.0759 | 0.2360 | -0.0402 | 0.0408 | 0.3394 | 13.7495 | 0.6847 | -50.9258 |
| LargeArteryStroke | s_Streptococcus_infantis      | Inverse variance weighted | 18 | -0.0954 | 0.0546 | 0.0807 | -0.0402 | 0.0408 | 0.3394 | 13.7495 | 0.6847 | -50.9258 |
| LargeArteryStroke | s_Streptococcus_infantis      | Simple mode               | 18 | -0.1616 | 0.1387 | 0.2600 | -0.0402 | 0.0408 | 0.3394 | 13.7495 | 0.6847 | -50.9258 |
| LargeArteryStroke | s_Streptococcus_infantis      | Weighted mode             | 18 | -0.1282 | 0.1446 | 0.3877 | -0.0402 | 0.0408 | 0.3394 | 13.7495 | 0.6847 | -50.9258 |
| LargeArteryStroke | s_Streptococcus_mitis         | MR Egger                  | 18 | 0.2175  | 0.1698 | 0.2185 | -0.0748 | 0.0416 | 0.0914 | 14.7071 | 0.6166 | -43.0602 |
| LargeArteryStroke | s_Streptococcus_mitis         | Weighted median           | 18 | -0.0521 | 0.0770 | 0.4990 | -0.0748 | 0.0416 | 0.0914 | 14.7071 | 0.6166 | -43.0602 |
| LargeArteryStroke | s_Streptococcus_mitis         | Inverse variance weighted | 18 | -0.0706 | 0.0558 | 0.2059 | -0.0748 | 0.0416 | 0.0914 | 14.7071 | 0.6166 | -43.0602 |
| LargeArteryStroke | s_Streptococcus_mitis         | Simple mode               | 18 | -0.1321 | 0.1343 | 0.3391 | -0.0748 | 0.0416 | 0.0914 | 14.7071 | 0.6166 | -43.0602 |
| LargeArteryStroke | s_Streptococcus_mitis         | Weighted mode             | 18 | -0.0195 | 0.1256 | 0.8786 | -0.0748 | 0.0416 | 0.0914 | 14.7071 | 0.6166 | -43.0602 |
| LargeArteryStroke | s_Streptococcus_mutans        | MR Egger                  | 18 | 0.0102  | 0.2393 | 0.9664 | 0.0107  | 0.0587 | 0.8579 | 26.2401 | 0.0507 | -13.3782 |
| LargeArteryStroke | s_Streptococcus_mutans        | Weighted median           | 18 | -0.0161 | 0.0918 | 0.8606 | 0.0107  | 0.0587 | 0.8579 | 26.2401 | 0.0507 | -13.3782 |
| LargeArteryStroke | s_Streptococcus_mutans        | Inverse variance weighted | 18 | 0.0514  | 0.0763 | 0.5011 | 0.0107  | 0.0587 | 0.8579 | 26.2401 | 0.0507 | -13.3782 |
| LargeArteryStroke | s_Streptococcus_mutans        | Simple mode               | 18 | -0.0371 | 0.1527 | 0.8107 | 0.0107  | 0.0587 | 0.8579 | 26.2401 | 0.0507 | -13.3782 |
| LargeArteryStroke | s_Streptococcus_mutans        | Weighted mode             | 18 | -0.0423 | 0.1376 | 0.7620 | 0.0107  | 0.0587 | 0.8579 | 26.2401 | 0.0507 | -13.3782 |
| LargeArteryStroke | s_Streptococcus_oralis        | MR Egger                  | 18 | 0.1964  | 0.1915 | 0.3203 | -0.0681 | 0.0470 | 0.1662 | 17.0785 | 0.4491 | -11.3436 |
| LargeArteryStroke | s_Streptococcus_oralis        | Weighted median           | 18 | -0.0932 | 0.0864 | 0.2808 | -0.0681 | 0.0470 | 0.1662 | 17.0785 | 0.4491 | -11.3436 |
| LargeArteryStroke | s_Streptococcus_oralis        | Inverse variance weighted | 18 | -0.0660 | 0.0630 | 0.2953 | -0.0681 | 0.0470 | 0.1662 | 17.0785 | 0.4491 | -11.3436 |
| LargeArteryStroke | s_Streptococcus_oralis        | Simple mode               | 18 | -0.1395 | 0.1465 | 0.3542 | -0.0681 | 0.0470 | 0.1662 | 17.0785 | 0.4491 | -11.3436 |
| LargeArteryStroke | s_Streptococcus_oralis        | Weighted mode             | 18 | -0.1444 | 0.1528 | 0.3579 | -0.0681 | 0.0470 | 0.1662 | 17.0785 | 0.4491 | -11.3436 |
| LargeArteryStroke | s_Streptococcus_parasanguinis | MR Egger                  | 18 | 0.0085  | 0.2355 | 0.9715 | -0.0291 | 0.0577 | 0.6208 | 15.2858 | 0.5038 | -8.9626  |
| LargeArteryStroke | s_Streptococcus_parasanguinis | Weighted median           | 18 | -0.1122 | 0.1052 | 0.2865 | -0.0291 | 0.0577 | 0.6208 | 15.2858 | 0.5038 | -8.9626  |
| LargeArteryStroke | s_Streptococcus_parasanguinis | Inverse variance weighted | 18 | -0.1037 | 0.0773 | 0.1800 | -0.0291 | 0.0577 | 0.6208 | 15.2858 | 0.5038 | -8.9626  |
| LargeArteryStroke | s_Streptococcus_parasanguinis | Simple mode               | 18 | -0.1494 | 0.1589 | 0.3603 | -0.0291 | 0.0577 | 0.6208 | 15.2858 | 0.5038 | -8.9626  |
| LargeArteryStroke | s_Streptococcus_parasanguinis | Weighted mode             | 18 | -0.1374 | 0.1622 | 0.4087 | -0.0291 | 0.0577 | 0.6208 | 15.2858 | 0.5038 | -8.9626  |
| LargeArteryStroke | s_Streptococcus_pneumoniae    | MR Egger                  | 18 | 0.2403  | 0.1716 | 0.1804 | -0.0804 | 0.0421 | 0.0740 | 20.8385 | 0.2336 | -24.9422 |
| LargeArteryStroke | s_Streptococcus_pneumoniae    | Weighted median           | 18 | -0.0695 | 0.0814 | 0.3930 | -0.0804 | 0.0421 | 0.0740 | 20.8385 | 0.2336 | -24.9422 |
| LargeArteryStroke | s_Streptococcus_pneumoniae    | Inverse variance weighted | 18 | -0.0694 | 0.0606 | 0.2516 | -0.0804 | 0.0421 | 0.0740 | 20.8385 | 0.2336 | -24.9422 |
| LargeArteryStroke | s_Streptococcus_pneumoniae    | Simple mode               | 18 | -0.0615 | 0.1522 | 0.6912 | -0.0804 | 0.0421 | 0.0740 | 20.8385 | 0.2336 | -24.9422 |
| LargeArteryStroke | s_Streptococcus_pneumoniae    | Weighted mode             | 18 | -0.0038 | 0.1340 | 0.9779 | -0.0804 | 0.0421 | 0.0740 | 20.8385 | 0.2336 | -24.9422 |
| LargeArteryStroke | s_Streptococcus_pyogenes      | MR Egger                  | 18 | 0.1341  | 0.3292 | 0.6891 | 0.0031  | 0.0807 | 0.9696 | 8.9890  | 0.9139 | -16.4346 |
| LargeArteryStroke | s_Streptococcus_pyogenes      | Weighted median           | 18 | 0.1101  | 0.1462 | 0.4512 | 0.0031  | 0.0807 | 0.9696 | 8.9890  | 0.9139 | -16.4346 |
| LargeArteryStroke | s_Streptococcus_pyogenes      | Inverse variance weighted | 18 | 0.1462  | 0.1081 | 0.1763 | 0.0031  | 0.0807 | 0.9696 | 8.9890  | 0.9139 | -16.4346 |
| LargeArteryStroke | s_Streptococcus_pyogenes      | Simple mode               | 18 | -0.0145 | 0.2616 | 0.9566 | 0.0031  | 0.0807 | 0.9696 | 8.9890  | 0.9139 | -16.4346 |
| LargeArteryStroke | s_Streptococcus_pyogenes      | Weighted mode             | 18 | -0.0199 | 0.2347 | 0.9335 | 0.0031  | 0.0807 | 0.9696 | 8.9890  | 0.9139 | -16.4346 |
| LargeArteryStroke | s_Streptococcus_salivarius    | MR Egger                  | 18 | -0.0439 | 0.2217 | 0.8456 | -0.0058 | 0.0544 | 0.9160 | 11.4277 | 0.7823 | -41.7227 |
| LargeArteryStroke | s_Streptococcus_salivarius    | Weighted median           | 18 | -0.0442 | 0.0974 | 0.6498 | -0.0058 | 0.0544 | 0.9160 | 11.4277 | 0.7823 | -41.7227 |
| LargeArteryStroke | s_Streptococcus_salivarius    | Inverse variance weighted | 18 | -0.0663 | 0.0728 | 0.3623 | -0.0058 | 0.0544 | 0.9160 | 11.4277 | 0.7823 | -41.7227 |
| LargeArteryStroke | s_Streptococcus_salivarius    | Simple mode               | 18 | 0.0204  | 0.1822 | 0.9121 | -0.0058 | 0.0544 | 0.9160 | 11.4277 | 0.7823 | -41.7227 |
| LargeArteryStroke | s_Streptococcus_salivarius    | Weighted mode             | 18 | -0.0221 | 0.1564 | 0.8893 | -0.0058 | 0.0544 | 0.9160 | 11.4277 | 0.7823 | -41.7227 |
| LargeArteryStroke | s_Streptococcus_sanguinis     | MR Egger                  | 18 | 0.2062  | 0.1968 | 0.3103 | -0.0789 | 0.0483 | 0.1216 | 16.4272 | 0.4938 | -59.7896 |
| LargeArteryStroke | s_Streptococcus_sanguinis     | Weighted median           | 18 | -0.1102 | 0.0921 | 0.2314 | -0.0789 | 0.0483 | 0.1216 | 16.4272 | 0.4938 | -59.7896 |
| LargeArteryStroke | s_Streptococcus_sanguinis     | Inverse variance weighted | 18 | -0.0977 | 0.0646 | 0.1306 | -0.0789 | 0.0483 | 0.1216 | 16.4272 | 0.4938 | -59.7896 |
| LargeArteryStroke | s_Streptococcus_sanguinis     | Simple mode               | 18 | -0.2377 | 0.1720 | 0.1849 | -0.0789 | 0.0483 | 0.1216 | 16.4272 | 0.4938 | -59.7896 |
| LargeArteryStroke | s_Streptococcus_sanguinis     | Weighted mode             | 18 | -0.2197 | 0.1683 | 0.2090 | -0.0789 | 0.0483 | 0.1216 | 16.4272 | 0.4938 | -59.7896 |
| LargeArteryStroke | s_Streptococcus_suis          | MR Egger                  | 18 | 0.0620  | 0.2643 | 0.8177 | -0.0035 | 0.0648 | 0.9578 | 13.8680 | 0.6085 | -15.8190 |
| LargeArteryStroke | s_Streptococcus_suis          | Weighted median           | 18 | 0.0719  | 0.1234 | 0.5599 | -0.0035 | 0.0648 | 0.9578 | 13.8680 | 0.6085 | -15.8190 |
| LargeArteryStroke | s_Streptococcus_suis          | Inverse variance weighted | 18 | 0.0485  | 0.0868 | 0.5762 | -0.0035 | 0.0648 | 0.9578 | 13.8680 | 0.6085 | -15.8190 |
| LargeArteryStroke | s_Streptococcus_suis          | Simple mode               | 18 | 0.0533  | 0.2163 | 0.8083 | -0.0035 | 0.0648 | 0.9578 | 13.8680 | 0.6085 | -15.8190 |
| LargeArteryStroke | s_Streptococcus_suis          | Weighted mode             | 18 | 0.0386  | 0.2336 | 0.8706 | -0.0035 | 0.0648 | 0.9578 | 13.8680 | 0.6085 | -15.8190 |
| LargeArteryStroke | s_Streptococcus_vestibularis  | MR Egger                  | 18 | 0.1459  | 0.2186 | 0.5140 | -0.0526 | 0.0536 | 0.3408 | 13.5089 | 0.7015 | -21.3398 |
| LargeArteryStroke | s_Streptococcus_vestibularis  | Weighted median           | 18 | -0.0711 | 0.0968 | 0.4625 | -0.0526 | 0.0536 | 0.3408 | 13.5089 | 0.7015 | -21.3398 |
| LargeArteryStroke | s_Streptococcus_vestibularis  | Inverse variance weighted | 18 | -0.0568 | 0.0718 | 0.4286 | -0.0526 | 0.0536 | 0.3408 | 13.5089 | 0.7015 | -21.3398 |
| LargeArteryStroke | s_Streptococcus_vestibularis  | Simple mode               | 18 | -0.0739 | 0.1546 | 0.6389 | -0.0526 | 0.0536 | 0.3408 | 13.5089 | 0.7015 | -21.3398 |
| LargeArteryStroke | s_Streptococcus_vestibularis  | Weighted mode             | 18 | -0.0653 | 0.1547 | 0.6781 | -0.0526 | 0.0536 | 0.3408 | 13.5089 | 0.7015 | -21.3398 |
| LargeArteryStroke | s_Tannerella_forsythia        | MR Egger                  | 18 | 0.0227  | 0.2535 | 0.9297 | -0.0047 | 0.0622 | 0.9405 | 12.9121 | 0.6792 | -43.5682 |
| LargeArteryStroke | s_Tannerella_forsythia        | Weighted median           | 18 | 0.0131  | 0.1145 | 0.9087 | -0.0047 | 0.0622 | 0.9405 | 12.9121 | 0.6792 | -43.5682 |

|                   |                                                  |                           |    |         |        |        |         |        |        |         |        |           |
|-------------------|--------------------------------------------------|---------------------------|----|---------|--------|--------|---------|--------|--------|---------|--------|-----------|
| LargeArteryStroke | s_Tannerella_forsythia                           | Inverse variance weighted | 18 | 0.0046  | 0.0832 | 0.9562 | -0.0047 | 0.0622 | 0.9405 | 12.9121 | 0.6792 | -43.5682  |
| LargeArteryStroke | s_Tannerella_forsythia                           | Simple mode               | 18 | -0.0022 | 0.1992 | 0.9912 | -0.0047 | 0.0622 | 0.9405 | 12.9121 | 0.6792 | -43.5682  |
| LargeArteryStroke | s_Tannerella_forsythia                           | Weighted mode             | 18 | 0.0011  | 0.1817 | 0.9950 | -0.0047 | 0.0622 | 0.9405 | 12.9121 | 0.6792 | -43.5682  |
| LargeArteryStroke | s_Treponema_denticola                            | MR Egger                  | 18 | -0.0765 | 0.2027 | 0.7108 | 0.0343  | 0.0497 | 0.5003 | 23.9527 | 0.0905 | -36.5407  |
| LargeArteryStroke | s_Treponema_denticola                            | Weighted median           | 18 | 0.1085  | 0.0827 | 0.1896 | 0.0343  | 0.0497 | 0.5003 | 23.9527 | 0.0905 | -36.5407  |
| LargeArteryStroke | s_Treponema_denticola                            | Inverse variance weighted | 18 | 0.0555  | 0.0655 | 0.3967 | 0.0343  | 0.0497 | 0.5003 | 23.9527 | 0.0905 | -36.5407  |
| LargeArteryStroke | s_Treponema_denticola                            | Simple mode               | 18 | 0.1380  | 0.1656 | 0.4162 | 0.0343  | 0.0497 | 0.5003 | 23.9527 | 0.0905 | -36.5407  |
| LargeArteryStroke | s_Treponema_denticola                            | Weighted mode             | 18 | 0.1302  | 0.1556 | 0.4145 | 0.0343  | 0.0497 | 0.5003 | 23.9527 | 0.0905 | -36.5407  |
| LargeArteryStroke | s_Treponema_vincentii                            | MR Egger                  | 18 | 0.0975  | 0.1515 | 0.5289 | -0.0146 | 0.0371 | 0.6996 | 16.0834 | 0.4472 | -41.5599  |
| LargeArteryStroke | s_Treponema_vincentii                            | Weighted median           | 18 | 0.0485  | 0.0695 | 0.4854 | -0.0146 | 0.0371 | 0.6996 | 16.0834 | 0.4472 | -41.5599  |
| LargeArteryStroke | s_Treponema_vincentii                            | Inverse variance weighted | 18 | 0.0413  | 0.0496 | 0.4053 | -0.0146 | 0.0371 | 0.6996 | 16.0834 | 0.4472 | -41.5599  |
| LargeArteryStroke | s_Treponema_vincentii                            | Simple mode               | 18 | 0.0462  | 0.1190 | 0.7027 | -0.0146 | 0.0371 | 0.6996 | 16.0834 | 0.4472 | -41.5599  |
| LargeArteryStroke | s_Treponema_vincentii                            | Weighted mode             | 18 | 0.0282  | 0.1169 | 0.8126 | -0.0146 | 0.0371 | 0.6996 | 16.0834 | 0.4472 | -41.5599  |
| LargeArteryStroke | s_Veillonella_atypica                            | MR Egger                  | 18 | -0.2827 | 0.2908 | 0.3456 | 0.0486  | 0.0713 | 0.5055 | 11.6949 | 0.7647 | -11.2048  |
| LargeArteryStroke | s_Veillonella_atypica                            | Weighted median           | 18 | -0.0510 | 0.1307 | 0.6962 | 0.0486  | 0.0713 | 0.5055 | 11.6949 | 0.7647 | -11.2048  |
| LargeArteryStroke | s_Veillonella_atypica                            | Inverse variance weighted | 18 | -0.0955 | 0.0955 | 0.3173 | 0.0486  | 0.0713 | 0.5055 | 11.6949 | 0.7647 | -11.2048  |
| LargeArteryStroke | s_Veillonella_atypica                            | Simple mode               | 18 | -0.0302 | 0.2028 | 0.8834 | 0.0486  | 0.0713 | 0.5055 | 11.6949 | 0.7647 | -11.2048  |
| LargeArteryStroke | s_Veillonella_atypica                            | Weighted mode             | 18 | -0.0475 | 0.2086 | 0.8226 | 0.0486  | 0.0713 | 0.5055 | 11.6949 | 0.7647 | -11.2048  |
| LargeArteryStroke | s_Veillonella_dispar                             | MR Egger                  | 18 | -0.1976 | 0.2930 | 0.5098 | 0.0215  | 0.0719 | 0.7690 | 13.1406 | 0.6625 | -8.7183   |
| LargeArteryStroke | s_Veillonella_dispar                             | Weighted median           | 18 | -0.0915 | 0.1324 | 0.4892 | 0.0215  | 0.0719 | 0.7690 | 13.1406 | 0.6625 | -8.7183   |
| LargeArteryStroke | s_Veillonella_dispar                             | Inverse variance weighted | 18 | -0.1149 | 0.0962 | 0.2324 | 0.0215  | 0.0719 | 0.7690 | 13.1406 | 0.6625 | -8.7183   |
| LargeArteryStroke | s_Veillonella_dispar                             | Simple mode               | 18 | -0.1167 | 0.2154 | 0.5950 | 0.0215  | 0.0719 | 0.7690 | 13.1406 | 0.6625 | -8.7183   |
| LargeArteryStroke | s_Veillonella_dispar                             | Weighted mode             | 18 | -0.1109 | 0.2071 | 0.5990 | 0.0215  | 0.0719 | 0.7690 | 13.1406 | 0.6625 | -8.7183   |
| LargeArteryStroke | s_Veillonella_parvula                            | MR Egger                  | 18 | -0.2228 | 0.2627 | 0.4089 | 0.0329  | 0.0644 | 0.6167 | 8.8663  | 0.9188 | -48.2643  |
| LargeArteryStroke | s_Veillonella_parvula                            | Weighted median           | 18 | -0.0486 | 0.1140 | 0.6700 | 0.0329  | 0.0644 | 0.6167 | 8.8663  | 0.9188 | -48.2643  |
| LargeArteryStroke | s_Veillonella_parvula                            | Inverse variance weighted | 18 | -0.0961 | 0.0862 | 0.2650 | 0.0329  | 0.0644 | 0.6167 | 8.8663  | 0.9188 | -48.2643  |
| LargeArteryStroke | s_Veillonella_parvula                            | Simple mode               | 18 | 0.0472  | 0.1905 | 0.8073 | 0.0329  | 0.0644 | 0.6167 | 8.8663  | 0.9188 | -48.2643  |
| LargeArteryStroke | s_Veillonella_parvula                            | Weighted mode             | 18 | 0.0221  | 0.1907 | 0.9092 | 0.0329  | 0.0644 | 0.6167 | 8.8663  | 0.9188 | -48.2643  |
| LargeArteryStroke | s_butyrates-producing_bacterium                  | MR Egger                  | 18 | 0.2806  | 0.2227 | 0.2259 | -0.0523 | 0.0546 | 0.3522 | 13.5863 | 0.6961 | -24.4143  |
| LargeArteryStroke | s_butyrates-producing_bacterium                  | Weighted median           | 18 | 0.0351  | 0.0981 | 0.7206 | -0.0523 | 0.0546 | 0.3522 | 13.5863 | 0.6961 | -24.4143  |
| LargeArteryStroke | s_butyrates-producing_bacterium                  | Inverse variance weighted | 18 | 0.0790  | 0.0731 | 0.2804 | -0.0523 | 0.0546 | 0.3522 | 13.5863 | 0.6961 | -24.4143  |
| LargeArteryStroke | s_butyrates-producing_bacterium                  | Simple mode               | 18 | -0.0341 | 0.1573 | 0.8308 | -0.0523 | 0.0546 | 0.3522 | 13.5863 | 0.6961 | -24.4143  |
| LargeArteryStroke | s_butyrates-producing_bacterium                  | Weighted mode             | 18 | 0.0002  | 0.1590 | 0.9992 | -0.0523 | 0.0546 | 0.3522 | 13.5863 | 0.6961 | -24.4143  |
| LargeArteryStroke | s_unclassified_Citrobacter_sp._30_2              | MR Egger                  | 18 | 0.5244  | 0.3329 | 0.1347 | -0.1223 | 0.0816 | 0.1534 | 18.4269 | 0.3624 | -1.8016   |
| LargeArteryStroke | s_unclassified_Citrobacter_sp._30_2              | Weighted median           | 18 | 0.0532  | 0.1498 | 0.7227 | -0.1223 | 0.0816 | 0.1534 | 18.4269 | 0.3624 | -1.8016   |
| LargeArteryStroke | s_unclassified_Citrobacter_sp._30_2              | Inverse variance weighted | 18 | 0.0532  | 0.1132 | 0.6383 | -0.1223 | 0.0816 | 0.1534 | 18.4269 | 0.3624 | -1.8016   |
| LargeArteryStroke | s_unclassified_Citrobacter_sp._30_2              | Simple mode               | 18 | -0.2028 | 0.2815 | 0.4811 | -0.1223 | 0.0816 | 0.1534 | 18.4269 | 0.3624 | -1.8016   |
| LargeArteryStroke | s_unclassified_Citrobacter_sp._30_2              | Weighted mode             | 18 | -0.1237 | 0.2858 | 0.6706 | -0.1223 | 0.0816 | 0.1534 | 18.4269 | 0.3624 | -1.8016   |
| LargeArteryStroke | s_unclassified_Clostridiales_bacterium_1_7_47FAA | MR Egger                  | 18 | 0.1718  | 0.1353 | 0.2226 | -0.0417 | 0.0332 | 0.2275 | 9.2149  | 0.9333 | -215.0950 |
| LargeArteryStroke | s_unclassified_Clostridiales_bacterium_1_7_47FAA | Weighted median           | 18 | -0.0077 | 0.0613 | 0.8994 | -0.0417 | 0.0332 | 0.2275 | 9.2149  | 0.9333 | -215.0950 |
| LargeArteryStroke | s_unclassified_Clostridiales_bacterium_1_7_47FAA | Inverse variance weighted | 18 | 0.0113  | 0.0444 | 0.7991 | -0.0417 | 0.0332 | 0.2275 | 9.2149  | 0.9333 | -215.0950 |
| LargeArteryStroke | s_unclassified_Clostridiales_bacterium_1_7_47FAA | Simple mode               | 18 | 0.1279  | 0.0986 | 0.2119 | -0.0417 | 0.0332 | 0.2275 | 9.2149  | 0.9333 | -215.0950 |
| LargeArteryStroke | s_unclassified_Clostridiales_bacterium_1_7_47FAA | Weighted mode             | 18 | 0.1262  | 0.1010 | 0.2283 | -0.0417 | 0.0332 | 0.2275 | 9.2149  | 0.9333 | -215.0950 |
| LargeArteryStroke | s_unclassified_Clostridium_sp._D5                | MR Egger                  | 18 | 0.3856  | 0.1531 | 0.0228 | -0.0638 | 0.0375 | 0.1086 | 18.1702 | 0.3782 | -44.9850  |
| LargeArteryStroke | s_unclassified_Clostridium_sp._D5                | Weighted median           | 18 | 0.1833  | 0.0709 | 0.0097 | -0.0638 | 0.0375 | 0.1086 | 18.1702 | 0.3782 | -44.9850  |
| LargeArteryStroke | s_unclassified_Clostridium_sp._D5                | Inverse variance weighted | 18 | 0.1399  | 0.0520 | 0.0071 | -0.0638 | 0.0375 | 0.1086 | 18.1702 | 0.3782 | -44.9850  |
| LargeArteryStroke | s_unclassified_Clostridium_sp._D5                | Simple mode               | 18 | 0.1835  | 0.1410 | 0.2105 | -0.0638 | 0.0375 | 0.1086 | 18.1702 | 0.3782 | -44.9850  |
| LargeArteryStroke | s_unclassified_Clostridium_sp._D5                | Weighted mode             | 18 | 0.1807  | 0.1275 | 0.1743 | -0.0638 | 0.0375 | 0.1086 | 18.1702 | 0.3782 | -44.9850  |
| LargeArteryStroke | s_unclassified_Clostridium_sp._HGF2              | MR Egger                  | 18 | 0.2346  | 0.1923 | 0.2403 | -0.0532 | 0.0472 | 0.2756 | 10.6934 | 0.8720 | -88.9734  |
| LargeArteryStroke | s_unclassified_Clostridium_sp._HGF2              | Weighted median           | 18 | 0.0212  | 0.0905 | 0.8145 | -0.0532 | 0.0472 | 0.2756 | 10.6934 | 0.8720 | -88.9734  |
| LargeArteryStroke | s_unclassified_Clostridium_sp._HGF2              | Inverse variance weighted | 18 | 0.0295  | 0.0632 | 0.6402 | -0.0532 | 0.0472 | 0.2756 | 10.6934 | 0.8720 | -88.9734  |
| LargeArteryStroke | s_unclassified_Clostridium_sp._HGF2              | Simple mode               | 18 | 0.0141  | 0.1434 | 0.9226 | -0.0532 | 0.0472 | 0.2756 | 10.6934 | 0.8720 | -88.9734  |
| LargeArteryStroke | s_unclassified_Clostridium_sp._HGF2              | Weighted mode             | 18 | 0.0042  | 0.1547 | 0.9787 | -0.0532 | 0.0472 | 0.2756 | 10.6934 | 0.8720 | -88.9734  |
| LargeArteryStroke | s_unclassified_Clostridium_sp._L2-50             | MR Egger                  | 18 | 0.2062  | 0.1836 | 0.2779 | -0.0419 | 0.0450 | 0.3664 | 12.2054 | 0.7875 | -81.3945  |
| LargeArteryStroke | s_unclassified_Clostridium_sp._L2-50             | Weighted median           | 18 | 0.0777  | 0.0788 | 0.3241 | -0.0419 | 0.0450 | 0.3664 | 12.2054 | 0.7875 | -81.3945  |
| LargeArteryStroke | s_unclassified_Clostridium_sp._L2-50             | Inverse variance weighted | 18 | 0.0450  | 0.0603 | 0.4551 | -0.0419 | 0.0450 | 0.3664 | 12.2054 | 0.7875 | -81.3945  |
| LargeArteryStroke | s_unclassified_Clostridium_sp._L2-50             | Simple mode               | 18 | 0.0552  | 0.1334 | 0.6841 | -0.0419 | 0.0450 | 0.3664 | 12.2054 | 0.7875 | -81.3945  |
| LargeArteryStroke | s_unclassified_Clostridium_sp._L2-50             | Weighted mode             | 18 | 0.1017  | 0.1256 | 0.4292 | -0.0419 | 0.0450 | 0.3664 | 12.2054 | 0.7875 | -81.3945  |
| LargeArteryStroke | s_unclassified_Clostridium_sp._SY8519            | MR Egger                  | 18 | -0.1892 | 0.2409 | 0.4437 | 0.0695  | 0.0591 | 0.2569 | 22.7861 | 0.1563 | -39.6851  |
| LargeArteryStroke | s_unclassified_Clostridium_sp._SY8519            | Weighted median           | 18 | 0.1396  | 0.1021 | 0.1718 | 0.0695  | 0.0591 | 0.2569 | 22.7861 | 0.1563 | -39.6851  |
| LargeArteryStroke | s_unclassified_Clostridium_sp._SY8519            | Inverse variance weighted | 18 | 0.0783  | 0.0800 | 0.3276 | 0.0695  | 0.0591 | 0.2569 | 22.7861 | 0.1563 | -39.6851  |

|                   |                                                        |                           |    |         |        |        |         |        |        |         |        |           |
|-------------------|--------------------------------------------------------|---------------------------|----|---------|--------|--------|---------|--------|--------|---------|--------|-----------|
| LargeArteryStroke | s_unclassified_Clostridium_sp._SY8519                  | Simple mode               | 18 | 0.2348  | 0.2045 | 0.2666 | 0.0695  | 0.0591 | 0.2569 | 22.7861 | 0.1563 | -39.6851  |
| LargeArteryStroke | s_unclassified_Clostridium_sp._SY8519                  | Weighted mode             | 18 | 0.2260  | 0.1876 | 0.2449 | 0.0695  | 0.0591 | 0.2569 | 22.7861 | 0.1563 | -39.6851  |
| LargeArteryStroke | s_unclassified_Coprobacillus_sp._29_1                  | MR Egger                  | 18 | -0.0846 | 0.1766 | 0.6385 | 0.0119  | 0.0433 | 0.7878 | 15.8469 | 0.4637 | -30.1832  |
| LargeArteryStroke | s_unclassified_Coprobacillus_sp._29_1                  | Weighted median           | 18 | 0.0357  | 0.0777 | 0.6457 | 0.0119  | 0.0433 | 0.7878 | 15.8469 | 0.4637 | -30.1832  |
| LargeArteryStroke | s_unclassified_Coprobacillus_sp._29_1                  | Inverse variance weighted | 18 | -0.0389 | 0.0580 | 0.5023 | 0.0119  | 0.0433 | 0.7878 | 15.8469 | 0.4637 | -30.1832  |
| LargeArteryStroke | s_unclassified_Coprobacillus_sp._29_1                  | Simple mode               | 18 | 0.0492  | 0.1410 | 0.7316 | 0.0119  | 0.0433 | 0.7878 | 15.8469 | 0.4637 | -30.1832  |
| LargeArteryStroke | s_unclassified_Coprobacillus_sp._29_1                  | Weighted mode             | 18 | 0.0492  | 0.1350 | 0.7200 | 0.0119  | 0.0433 | 0.7878 | 15.8469 | 0.4637 | -30.1832  |
| LargeArteryStroke | s_unclassified_Desulfovibrio_sp._3_1_syn3              | MR Egger                  | 18 | -0.3796 | 0.4127 | 0.3714 | 0.0744  | 0.1011 | 0.4720 | 27.3085 | 0.0382 | -3.8036   |
| LargeArteryStroke | s_unclassified_Desulfovibrio_sp._3_1_syn3              | Weighted median           | 18 | -0.1345 | 0.1514 | 0.3745 | 0.0744  | 0.1011 | 0.4720 | 27.3085 | 0.0382 | -3.8036   |
| LargeArteryStroke | s_unclassified_Desulfovibrio_sp._3_1_syn3              | Inverse variance weighted | 18 | -0.0924 | 0.1336 | 0.4894 | 0.0744  | 0.1011 | 0.4720 | 27.3085 | 0.0382 | -3.8036   |
| LargeArteryStroke | s_unclassified_Desulfovibrio_sp._3_1_syn3              | Simple mode               | 18 | -0.1633 | 0.2652 | 0.5462 | 0.0744  | 0.1011 | 0.4720 | 27.3085 | 0.0382 | -3.8036   |
| LargeArteryStroke | s_unclassified_Desulfovibrio_sp._3_1_syn3              | Weighted mode             | 18 | -0.1774 | 0.2449 | 0.4788 | 0.0744  | 0.1011 | 0.4720 | 27.3085 | 0.0382 | -3.8036   |
| LargeArteryStroke | s_unclassified_Eggerthella_sp._YY7918                  | MR Egger                  | 18 | 0.0137  | 0.3687 | 0.9709 | -0.0429 | 0.0903 | 0.6410 | 21.9081 | 0.1462 | -8.6926   |
| LargeArteryStroke | s_unclassified_Eggerthella_sp._YY7918                  | Weighted median           | 18 | -0.0465 | 0.1534 | 0.7619 | -0.0429 | 0.0903 | 0.6410 | 21.9081 | 0.1462 | -8.6926   |
| LargeArteryStroke | s_unclassified_Eggerthella_sp._YY7918                  | Inverse variance weighted | 18 | -0.1519 | 0.1180 | 0.1982 | -0.0429 | 0.0903 | 0.6410 | 21.9081 | 0.1462 | -8.6926   |
| LargeArteryStroke | s_unclassified_Eggerthella_sp._YY7918                  | Simple mode               | 18 | 0.2649  | 0.3194 | 0.4183 | -0.0429 | 0.0903 | 0.6410 | 21.9081 | 0.1462 | -8.6926   |
| LargeArteryStroke | s_unclassified_Eggerthella_sp._YY7918                  | Weighted mode             | 18 | 0.2036  | 0.3217 | 0.5352 | -0.0429 | 0.0903 | 0.6410 | 21.9081 | 0.1462 | -8.6926   |
| LargeArteryStroke | s_unclassified_Enterobacteriaceae_bacterium_9_2_54FAA  | MR Egger                  | 18 | 0.5760  | 0.3697 | 0.1388 | -0.1493 | 0.0907 | 0.1190 | 28.0080 | 0.0448 | -2.4765   |
| LargeArteryStroke | s_unclassified_Enterobacteriaceae_bacterium_9_2_54FAA  | Weighted median           | 18 | -0.0541 | 0.1451 | 0.7095 | -0.1493 | 0.0907 | 0.1190 | 28.0080 | 0.0448 | -2.4765   |
| LargeArteryStroke | s_unclassified_Enterobacteriaceae_bacterium_9_2_54FAA  | Inverse variance weighted | 18 | 0.0008  | 0.1273 | 0.9949 | -0.1493 | 0.0907 | 0.1190 | 28.0080 | 0.0448 | -2.4765   |
| LargeArteryStroke | s_unclassified_Enterobacteriaceae_bacterium_9_2_54FAA  | Simple mode               | 18 | -0.3274 | 0.2826 | 0.2626 | -0.1493 | 0.0907 | 0.1190 | 28.0080 | 0.0448 | -2.4765   |
| LargeArteryStroke | s_unclassified_Enterobacteriaceae_bacterium_9_2_54FAA  | Weighted mode             | 18 | 0.1190  | 0.2630 | 0.6568 | -0.1493 | 0.0907 | 0.1190 | 28.0080 | 0.0448 | -2.4765   |
| LargeArteryStroke | s_unclassified_Erysipelotrichaceae_bacterium_3_1_53    | MR Egger                  | 18 | 0.1134  | 0.1331 | 0.4067 | -0.0224 | 0.0326 | 0.5032 | 24.9689 | 0.0704 | -148.9148 |
| LargeArteryStroke | s_unclassified_Erysipelotrichaceae_bacterium_3_1_53    | Weighted median           | 18 | 0.0492  | 0.0521 | 0.3448 | -0.0224 | 0.0326 | 0.5032 | 24.9689 | 0.0704 | -148.9148 |
| LargeArteryStroke | s_unclassified_Erysipelotrichaceae_bacterium_3_1_53    | Inverse variance weighted | 18 | 0.0273  | 0.0430 | 0.5256 | -0.0224 | 0.0326 | 0.5032 | 24.9689 | 0.0704 | -148.9148 |
| LargeArteryStroke | s_unclassified_Erysipelotrichaceae_bacterium_3_1_53    | Simple mode               | 18 | 0.0648  | 0.0994 | 0.5235 | -0.0224 | 0.0326 | 0.5032 | 24.9689 | 0.0704 | -148.9148 |
| LargeArteryStroke | s_unclassified_Erysipelotrichaceae_bacterium_3_1_53    | Weighted mode             | 18 | 0.0559  | 0.0903 | 0.5445 | -0.0224 | 0.0326 | 0.5032 | 24.9689 | 0.0704 | -148.9148 |
| LargeArteryStroke | s_unclassified_Erysipelotrichaceae_bacterium_5_2_54FAA | MR Egger                  | 18 | -0.0820 | 0.1429 | 0.5743 | 0.0286  | 0.0350 | 0.4269 | 19.4399 | 0.2465 | -61.9821  |
| LargeArteryStroke | s_unclassified_Erysipelotrichaceae_bacterium_5_2_54FAA | Weighted median           | 18 | 0.0106  | 0.0578 | 0.8546 | 0.0286  | 0.0350 | 0.4269 | 19.4399 | 0.2465 | -61.9821  |
| LargeArteryStroke | s_unclassified_Erysipelotrichaceae_bacterium_5_2_54FAA | Inverse variance weighted | 18 | 0.0281  | 0.0465 | 0.5453 | 0.0286  | 0.0350 | 0.4269 | 19.4399 | 0.2465 | -61.9821  |
| LargeArteryStroke | s_unclassified_Erysipelotrichaceae_bacterium_5_2_54FAA | Simple mode               | 18 | -0.0163 | 0.0973 | 0.8692 | 0.0286  | 0.0350 | 0.4269 | 19.4399 | 0.2465 | -61.9821  |
| LargeArteryStroke | s_unclassified_Erysipelotrichaceae_bacterium_5_2_54FAA | Weighted mode             | 18 | -0.0009 | 0.1001 | 0.9930 | 0.0286  | 0.0350 | 0.4269 | 19.4399 | 0.2465 | -61.9821  |
| LargeArteryStroke | s_unclassified_Lachnospiraceae_bacterium_1_4_56FAA     | MR Egger                  | 18 | -0.1036 | 0.1407 | 0.4723 | 0.0307  | 0.0345 | 0.3874 | 17.1674 | 0.3748 | -44.4668  |
| LargeArteryStroke | s_unclassified_Lachnospiraceae_bacterium_1_4_56FAA     | Weighted median           | 18 | -0.0023 | 0.0666 | 0.9725 | 0.0307  | 0.0345 | 0.3874 | 17.1674 | 0.3748 | -44.4668  |
| LargeArteryStroke | s_unclassified_Lachnospiraceae_bacterium_1_4_56FAA     | Inverse variance weighted | 18 | 0.0145  | 0.0459 | 0.7522 | 0.0307  | 0.0345 | 0.3874 | 17.1674 | 0.3748 | -44.4668  |
| LargeArteryStroke | s_unclassified_Lachnospiraceae_bacterium_1_4_56FAA     | Simple mode               | 18 | 0.0553  | 0.1147 | 0.6359 | 0.0307  | 0.0345 | 0.3874 | 17.1674 | 0.3748 | -44.4668  |
| LargeArteryStroke | s_unclassified_Lachnospiraceae_bacterium_1_4_56FAA     | Weighted mode             | 18 | 0.0073  | 0.1131 | 0.9496 | 0.0307  | 0.0345 | 0.3874 | 17.1674 | 0.3748 | -44.4668  |
| LargeArteryStroke | s_unclassified_Lachnospiraceae_bacterium_2_1_46FAA     | MR Egger                  | 18 | -0.0863 | 0.2079 | 0.6834 | 0.0399  | 0.0510 | 0.4449 | 19.2565 | 0.2556 | -50.6803  |
| LargeArteryStroke | s_unclassified_Lachnospiraceae_bacterium_2_1_46FAA     | Weighted median           | 18 | 0.0119  | 0.0892 | 0.8941 | 0.0399  | 0.0510 | 0.4449 | 19.2565 | 0.2556 | -50.6803  |
| LargeArteryStroke | s_unclassified_Lachnospiraceae_bacterium_2_1_46FAA     | Inverse variance weighted | 18 | 0.0675  | 0.0675 | 0.3174 | 0.0399  | 0.0510 | 0.4449 | 19.2565 | 0.2556 | -50.6803  |
| LargeArteryStroke | s_unclassified_Lachnospiraceae_bacterium_2_1_46FAA     | Simple mode               | 18 | 0.0015  | 0.1690 | 0.9928 | 0.0399  | 0.0510 | 0.4449 | 19.2565 | 0.2556 | -50.6803  |
| LargeArteryStroke | s_unclassified_Lachnospiraceae_bacterium_2_1_46FAA     | Weighted mode             | 18 | 0.0092  | 0.1502 | 0.9517 | 0.0399  | 0.0510 | 0.4449 | 19.2565 | 0.2556 | -50.6803  |
| LargeArteryStroke | s_unclassified_Lachnospiraceae_bacterium_3_1_57FAA_CT1 | MR Egger                  | 18 | 0.0260  | 0.1683 | 0.8792 | -0.0119 | 0.0413 | 0.7759 | 21.4186 | 0.1630 | -110.1052 |
| LargeArteryStroke | s_unclassified_Lachnospiraceae_bacterium_3_1_57FAA_CT1 | Weighted median           | 18 | -0.0094 | 0.0642 | 0.8839 | -0.0119 | 0.0413 | 0.7759 | 21.4186 | 0.1630 | -110.1052 |
| LargeArteryStroke | s_unclassified_Lachnospiraceae_bacterium_3_1_57FAA_CT1 | Inverse variance weighted | 18 | -0.0200 | 0.0537 | 0.7093 | -0.0119 | 0.0413 | 0.7759 | 21.4186 | 0.1630 | -110.1052 |
| LargeArteryStroke | s_unclassified_Lachnospiraceae_bacterium_3_1_57FAA_CT1 | Simple mode               | 18 | 0.0759  | 0.1157 | 0.5203 | -0.0119 | 0.0413 | 0.7759 | 21.4186 | 0.1630 | -110.1052 |
| LargeArteryStroke | s_unclassified_Lachnospiraceae_bacterium_3_1_57FAA_CT1 | Weighted mode             | 18 | -0.0178 | 0.1203 | 0.8843 | -0.0119 | 0.0413 | 0.7759 | 21.4186 | 0.1630 | -110.1052 |
| LargeArteryStroke | s_unclassified_Lachnospiraceae_bacterium_9_1_43BFAA    | MR Egger                  | 18 | -0.2859 | 0.1910 | 0.1540 | 0.0585  | 0.0469 | 0.2298 | 9.9871  | 0.9041 | -34.9433  |
| LargeArteryStroke | s_unclassified_Lachnospiraceae_bacterium_9_1_43BFAA    | Weighted median           | 18 | 0.0107  | 0.0832 | 0.8975 | 0.0585  | 0.0469 | 0.2298 | 9.9871  | 0.9041 | -34.9433  |
| LargeArteryStroke | s_unclassified_Lachnospiraceae_bacterium_9_1_43BFAA    | Inverse variance weighted | 18 | -0.0606 | 0.0628 | 0.3343 | 0.0585  | 0.0469 | 0.2298 | 9.9871  | 0.9041 | -34.9433  |
| LargeArteryStroke | s_unclassified_Lachnospiraceae_bacterium_9_1_43BFAA    | Simple mode               | 18 | 0.0461  | 0.1385 | 0.7434 | 0.0585  | 0.0469 | 0.2298 | 9.9871  | 0.9041 | -34.9433  |
| LargeArteryStroke | s_unclassified_Lachnospiraceae_bacterium_9_1_43BFAA    | Weighted mode             | 18 | 0.0345  | 0.1313 | 0.7956 | 0.0585  | 0.0469 | 0.2298 | 9.9871  | 0.9041 | -34.9433  |
| LargeArteryStroke | s_unclassified_Megasphaera_sp._UPII_135-E              | MR Egger                  | 18 | 0.0087  | 0.1749 | 0.9611 | 0.0268  | 0.0429 | 0.5411 | 20.3714 | 0.2040 | -53.5984  |
| LargeArteryStroke | s_unclassified_Megasphaera_sp._UPII_135-E              | Weighted median           | 18 | 0.0945  | 0.0722 | 0.1907 | 0.0268  | 0.0429 | 0.5411 | 20.3714 | 0.2040 | -53.5984  |
| LargeArteryStroke | s_unclassified_Megasphaera_sp._UPII_135-E              | Inverse variance weighted | 18 | 0.1119  | 0.0564 | 0.0473 | 0.0268  | 0.0429 | 0.5411 | 20.3714 | 0.2040 | -53.5984  |
| LargeArteryStroke | s_unclassified_Megasphaera_sp._UPII_135-E              | Simple mode               | 18 | 0.1023  | 0.1427 | 0.4830 | 0.0268  | 0.0429 | 0.5411 | 20.3714 | 0.2040 | -53.5984  |
| LargeArteryStroke | s_unclassified_Megasphaera_sp._UPII_135-E              | Weighted mode             | 18 | 0.0506  | 0.1277 | 0.6968 | 0.0268  | 0.0429 | 0.5411 | 20.3714 | 0.2040 | -53.5984  |
| LargeArteryStroke | s_unclassified_Oribacterium_sp._oral_taxon_078         | MR Egger                  | 18 | 0.2423  | 0.3128 | 0.4498 | -0.0424 | 0.0767 | 0.5876 | 10.1493 | 0.8587 | -14.3345  |
| LargeArteryStroke | s_unclassified_Oribacterium_sp._oral_taxon_078         | Weighted median           | 18 | 0.1243  | 0.1406 | 0.3766 | -0.0424 | 0.0767 | 0.5876 | 10.1493 | 0.8587 | -14.3345  |
| LargeArteryStroke | s_unclassified_Oribacterium_sp._oral_taxon_078         | Inverse variance weighted | 18 | 0.0788  | 0.1025 | 0.4424 | -0.0424 | 0.0767 | 0.5876 | 10.1493 | 0.8587 | -14.3345  |
| LargeArteryStroke | s_unclassified_Oribacterium_sp._oral_taxon_078         | Simple mode               | 18 | 0.1855  | 0.2347 | 0.4402 | -0.0424 | 0.0767 | 0.5876 | 10.1493 | 0.8587 | -14.3345  |

|                   |                                                 |                           |    |         |        |        |         |        |        |         |        |           |
|-------------------|-------------------------------------------------|---------------------------|----|---------|--------|--------|---------|--------|--------|---------|--------|-----------|
| LargeArteryStroke | s_unclassified_Oribacterium_sp._oral_taxon_078  | Weighted mode             | 18 | 0.1638  | 0.2295 | 0.4850 | -0.0424 | 0.0767 | 0.5876 | 10.1493 | 0.8587 | -14.3345  |
| LargeArteryStroke | s_unclassified_Oribacterium_sp._oral_taxon_108  | MR Egger                  | 18 | 0.4625  | 0.3444 | 0.1981 | -0.1147 | 0.0844 | 0.1928 | 21.8647 | 0.1900 | -0.2743   |
| LargeArteryStroke | s_unclassified_Oribacterium_sp._oral_taxon_108  | Weighted median           | 18 | -0.0667 | 0.1430 | 0.6411 | -0.1147 | 0.0844 | 0.1928 | 21.8647 | 0.1900 | -0.2743   |
| LargeArteryStroke | s_unclassified_Oribacterium_sp._oral_taxon_108  | Inverse variance weighted | 18 | 0.0202  | 0.1158 | 0.8617 | -0.1147 | 0.0844 | 0.1928 | 21.8647 | 0.1900 | -0.2743   |
| LargeArteryStroke | s_unclassified_Oribacterium_sp._oral_taxon_108  | Simple mode               | 18 | -0.1455 | 0.2397 | 0.5517 | -0.1147 | 0.0844 | 0.1928 | 21.8647 | 0.1900 | -0.2743   |
| LargeArteryStroke | s_unclassified_Oribacterium_sp._oral_taxon_108  | Weighted mode             | 18 | -0.1355 | 0.2310 | 0.5651 | -0.1147 | 0.0844 | 0.1928 | 21.8647 | 0.1900 | -0.2743   |
| LargeArteryStroke | s_unclassified_Peptoniphilus_sp._oral_taxon_386 | MR Egger                  | 18 | -0.1084 | 0.3107 | 0.7316 | 0.0109  | 0.0761 | 0.8882 | 6.1340  | 0.9866 | -9.3760   |
| LargeArteryStroke | s_unclassified_Peptoniphilus_sp._oral_taxon_386 | Weighted median           | 18 | -0.0555 | 0.1270 | 0.6619 | 0.0109  | 0.0761 | 0.8882 | 6.1340  | 0.9866 | -9.3760   |
| LargeArteryStroke | s_unclassified_Peptoniphilus_sp._oral_taxon_386 | Inverse variance weighted | 18 | -0.0665 | 0.1019 | 0.5139 | 0.0109  | 0.0761 | 0.8882 | 6.1340  | 0.9866 | -9.3760   |
| LargeArteryStroke | s_unclassified_Peptoniphilus_sp._oral_taxon_386 | Simple mode               | 18 | -0.0691 | 0.2178 | 0.7551 | 0.0109  | 0.0761 | 0.8882 | 6.1340  | 0.9866 | -9.3760   |
| LargeArteryStroke | s_unclassified_Peptoniphilus_sp._oral_taxon_386 | Weighted mode             | 18 | -0.0802 | 0.2079 | 0.7044 | 0.0109  | 0.0761 | 0.8882 | 6.1340  | 0.9866 | -9.3760   |
| LargeArteryStroke | s_unclassified_Prevotella_sp._oral_taxon_472    | MR Egger                  | 18 | -0.3532 | 0.3897 | 0.3783 | 0.0871  | 0.0954 | 0.3750 | 26.2473 | 0.0701 | -7.0895   |
| LargeArteryStroke | s_unclassified_Prevotella_sp._oral_taxon_472    | Weighted median           | 18 | -0.0980 | 0.1494 | 0.5119 | 0.0871  | 0.0954 | 0.3750 | 26.2473 | 0.0701 | -7.0895   |
| LargeArteryStroke | s_unclassified_Prevotella_sp._oral_taxon_472    | Inverse variance weighted | 18 | -0.0172 | 0.1271 | 0.8924 | 0.0871  | 0.0954 | 0.3750 | 26.2473 | 0.0701 | -7.0895   |
| LargeArteryStroke | s_unclassified_Prevotella_sp._oral_taxon_472    | Simple mode               | 18 | -0.1929 | 0.2365 | 0.4261 | 0.0871  | 0.0954 | 0.3750 | 26.2473 | 0.0701 | -7.0895   |
| LargeArteryStroke | s_unclassified_Prevotella_sp._oral_taxon_472    | Weighted mode             | 18 | -0.2584 | 0.2259 | 0.2686 | 0.0871  | 0.0954 | 0.3750 | 26.2473 | 0.0701 | -7.0895   |
| LargeArteryStroke | s_unclassified_Ruminococcaceae_bacterium_D16    | MR Egger                  | 18 | 0.0206  | 0.1317 | 0.8779 | -0.0037 | 0.0323 | 0.9091 | 14.9478 | 0.5285 | -160.7052 |
| LargeArteryStroke | s_unclassified_Ruminococcaceae_bacterium_D16    | Weighted median           | 18 | 0.0427  | 0.0593 | 0.4716 | -0.0037 | 0.0323 | 0.9091 | 14.9478 | 0.5285 | -160.7052 |
| LargeArteryStroke | s_unclassified_Ruminococcaceae_bacterium_D16    | Inverse variance weighted | 18 | 0.0061  | 0.0433 | 0.8873 | -0.0037 | 0.0323 | 0.9091 | 14.9478 | 0.5285 | -160.7052 |
| LargeArteryStroke | s_unclassified_Ruminococcaceae_bacterium_D16    | Simple mode               | 18 | 0.0523  | 0.0985 | 0.6023 | -0.0037 | 0.0323 | 0.9091 | 14.9478 | 0.5285 | -160.7052 |
| LargeArteryStroke | s_unclassified_Ruminococcaceae_bacterium_D16    | Weighted mode             | 18 | 0.0645  | 0.0937 | 0.5006 | -0.0037 | 0.0323 | 0.9091 | 14.9478 | 0.5285 | -160.7052 |
| LargeArteryStroke | s_unclassified_Ruminococcus_sp._5_l_39BFAA      | MR Egger                  | 18 | 0.4269  | 0.1581 | 0.0158 | -0.1037 | 0.0388 | 0.0166 | 22.0692 | 0.1821 | -23.8528  |
| LargeArteryStroke | s_unclassified_Ruminococcus_sp._5_l_39BFAA      | Weighted median           | 18 | 0.0273  | 0.0769 | 0.7225 | -0.1037 | 0.0388 | 0.0166 | 22.0692 | 0.1821 | -23.8528  |
| LargeArteryStroke | s_unclassified_Ruminococcus_sp._5_l_39BFAA      | Inverse variance weighted | 18 | 0.0274  | 0.0591 | 0.6426 | -0.1037 | 0.0388 | 0.0166 | 22.0692 | 0.1821 | -23.8528  |
| LargeArteryStroke | s_unclassified_Ruminococcus_sp._5_l_39BFAA      | Simple mode               | 18 | 0.0587  | 0.1257 | 0.6464 | -0.1037 | 0.0388 | 0.0166 | 22.0692 | 0.1821 | -23.8528  |
| LargeArteryStroke | s_unclassified_Ruminococcus_sp._5_l_39BFAA      | Weighted mode             | 18 | 0.0587  | 0.1230 | 0.6391 | -0.1037 | 0.0388 | 0.0166 | 22.0692 | 0.1821 | -23.8528  |
| LargeArteryStroke | s_unclassified_Streptococcus_sp._C150           | MR Egger                  | 18 | 0.1535  | 0.2185 | 0.4923 | -0.0562 | 0.0536 | 0.3094 | 14.3560 | 0.6418 | -24.0970  |
| LargeArteryStroke | s_unclassified_Streptococcus_sp._C150           | Weighted median           | 18 | -0.0689 | 0.0954 | 0.4699 | -0.0562 | 0.0536 | 0.3094 | 14.3560 | 0.6418 | -24.0970  |
| LargeArteryStroke | s_unclassified_Streptococcus_sp._C150           | Inverse variance weighted | 18 | -0.0631 | 0.0717 | 0.3790 | -0.0562 | 0.0536 | 0.3094 | 14.3560 | 0.6418 | -24.0970  |
| LargeArteryStroke | s_unclassified_Streptococcus_sp._C150           | Simple mode               | 18 | -0.0892 | 0.1655 | 0.5971 | -0.0562 | 0.0536 | 0.3094 | 14.3560 | 0.6418 | -24.0970  |
| LargeArteryStroke | s_unclassified_Streptococcus_sp._C150           | Weighted mode             | 18 | -0.0847 | 0.1659 | 0.6161 | -0.0562 | 0.0536 | 0.3094 | 14.3560 | 0.6418 | -24.0970  |
| LargeArteryStroke | s_unclassified_Streptococcus_sp._M143           | MR Egger                  | 18 | 0.2548  | 0.3105 | 0.4239 | -0.0943 | 0.0760 | 0.2326 | 16.8744 | 0.4629 | -0.2653   |
| LargeArteryStroke | s_unclassified_Streptococcus_sp._M143           | Weighted median           | 18 | -0.1852 | 0.1410 | 0.1890 | -0.0943 | 0.0760 | 0.2326 | 16.8744 | 0.4629 | -0.2653   |
| LargeArteryStroke | s_unclassified_Streptococcus_sp._M143           | Inverse variance weighted | 18 | -0.1092 | 0.1017 | 0.2826 | -0.0943 | 0.0760 | 0.2326 | 16.8744 | 0.4629 | -0.2653   |
| LargeArteryStroke | s_unclassified_Streptococcus_sp._M143           | Simple mode               | 18 | -0.2147 | 0.2241 | 0.3514 | -0.0943 | 0.0760 | 0.2326 | 16.8744 | 0.4629 | -0.2653   |
| LargeArteryStroke | s_unclassified_Streptococcus_sp._M143           | Weighted mode             | 18 | -0.1969 | 0.2257 | 0.3952 | -0.0943 | 0.0760 | 0.2326 | 16.8744 | 0.4629 | -0.2653   |
| LargeArteryStroke | s_unclassified_Streptococcus_sp._oral_taxon_071 | MR Egger                  | 18 | 0.1978  | 0.1785 | 0.2840 | -0.0700 | 0.0438 | 0.1291 | 14.7831 | 0.6111 | -26.4617  |
| LargeArteryStroke | s_unclassified_Streptococcus_sp._oral_taxon_071 | Weighted median           | 18 | -0.0839 | 0.0811 | 0.3010 | -0.0700 | 0.0438 | 0.1291 | 14.7831 | 0.6111 | -26.4617  |
| LargeArteryStroke | s_unclassified_Streptococcus_sp._oral_taxon_071 | Inverse variance weighted | 18 | -0.0719 | 0.0586 | 0.2198 | -0.0700 | 0.0438 | 0.1291 | 14.7831 | 0.6111 | -26.4617  |
| LargeArteryStroke | s_unclassified_Streptococcus_sp._oral_taxon_071 | Simple mode               | 18 | -0.1000 | 0.1404 | 0.4862 | -0.0700 | 0.0438 | 0.1291 | 14.7831 | 0.6111 | -26.4617  |
| LargeArteryStroke | s_unclassified_Streptococcus_sp._oral_taxon_071 | Weighted mode             | 18 | -0.0911 | 0.1435 | 0.5338 | -0.0700 | 0.0438 | 0.1291 | 14.7831 | 0.6111 | -26.4617  |
| LargeArteryStroke | s_unclassified_Veillonella_sp._oral_taxon_158   | MR Egger                  | 18 | -0.2813 | 0.2674 | 0.3085 | 0.0513  | 0.0656 | 0.4459 | 17.7383 | 0.3394 | -24.2835  |
| LargeArteryStroke | s_unclassified_Veillonella_sp._oral_taxon_158   | Weighted median           | 18 | -0.0941 | 0.1153 | 0.4146 | 0.0513  | 0.0656 | 0.4459 | 17.7383 | 0.3394 | -24.2835  |
| LargeArteryStroke | s_unclassified_Veillonella_sp._oral_taxon_158   | Inverse variance weighted | 18 | -0.0839 | 0.0868 | 0.3338 | 0.0513  | 0.0656 | 0.4459 | 17.7383 | 0.3394 | -24.2835  |
| LargeArteryStroke | s_unclassified_Veillonella_sp._oral_taxon_158   | Simple mode               | 18 | -0.0926 | 0.1876 | 0.6279 | 0.0513  | 0.0656 | 0.4459 | 17.7383 | 0.3394 | -24.2835  |
| LargeArteryStroke | s_unclassified_Veillonella_sp._oral_taxon_158   | Weighted mode             | 18 | -0.1015 | 0.1942 | 0.6082 | 0.0513  | 0.0656 | 0.4459 | 17.7383 | 0.3394 | -24.2835  |
| SmallVesselStroke | MF0001                                          | MR Egger                  | 21 | 0.0645  | 0.0904 | 0.4838 | -0.0087 | 0.0107 | 0.4300 | 18.9550 | 0.4597 | 465.1634  |
| SmallVesselStroke | MF0001                                          | Weighted median           | 21 | -0.0010 | 0.0342 | 0.9768 | -0.0087 | 0.0107 | 0.4300 | 18.9550 | 0.4597 | 465.1634  |
| SmallVesselStroke | MF0001                                          | Inverse variance weighted | 21 | -0.0059 | 0.0233 | 0.8013 | -0.0087 | 0.0107 | 0.4300 | 18.9550 | 0.4597 | 465.1634  |
| SmallVesselStroke | MF0001                                          | Simple mode               | 21 | 0.0217  | 0.0577 | 0.7115 | -0.0087 | 0.0107 | 0.4300 | 18.9550 | 0.4597 | 465.1634  |
| SmallVesselStroke | MF0001                                          | Weighted mode             | 21 | 0.0122  | 0.0536 | 0.8225 | -0.0087 | 0.0107 | 0.4300 | 18.9550 | 0.4597 | 465.1634  |
| SmallVesselStroke | MF0002                                          | MR Egger                  | 21 | 0.1298  | 0.1698 | 0.4543 | -0.0119 | 0.0202 | 0.5610 | 24.0470 | 0.1944 | 172.9819  |
| SmallVesselStroke | MF0002                                          | Weighted median           | 21 | 0.0044  | 0.0568 | 0.9382 | -0.0119 | 0.0202 | 0.5610 | 24.0470 | 0.1944 | 172.9819  |
| SmallVesselStroke | MF0002                                          | Inverse variance weighted | 21 | 0.0327  | 0.0431 | 0.4487 | -0.0119 | 0.0202 | 0.5610 | 24.0470 | 0.1944 | 172.9819  |
| SmallVesselStroke | MF0002                                          | Simple mode               | 21 | -0.0192 | 0.1125 | 0.8662 | -0.0119 | 0.0202 | 0.5610 | 24.0470 | 0.1944 | 172.9819  |
| SmallVesselStroke | MF0002                                          | Weighted mode             | 21 | -0.0166 | 0.1077 | 0.8789 | -0.0119 | 0.0202 | 0.5610 | 24.0470 | 0.1944 | 172.9819  |
| SmallVesselStroke | MF0003                                          | MR Egger                  | 21 | 0.0581  | 0.1353 | 0.6723 | -0.0104 | 0.0161 | 0.5264 | 36.5705 | 0.0090 | 314.6039  |
| SmallVesselStroke | MF0003                                          | Weighted median           | 21 | 0.0135  | 0.0402 | 0.7366 | -0.0104 | 0.0161 | 0.5264 | 36.5705 | 0.0090 | 314.6039  |
| SmallVesselStroke | MF0003                                          | Inverse variance weighted | 21 | -0.0262 | 0.0344 | 0.4455 | -0.0104 | 0.0161 | 0.5264 | 36.5705 | 0.0090 | 314.6039  |
| SmallVesselStroke | MF0003                                          | Simple mode               | 21 | 0.0969  | 0.0843 | 0.2640 | -0.0104 | 0.0161 | 0.5264 | 36.5705 | 0.0090 | 314.6039  |
| SmallVesselStroke | MF0003                                          | Weighted mode             | 21 | 0.0987  | 0.0689 | 0.1673 | -0.0104 | 0.0161 | 0.5264 | 36.5705 | 0.0090 | 314.6039  |

|                   |        |                           |    |         |        |        |         |        |        |         |        |           |
|-------------------|--------|---------------------------|----|---------|--------|--------|---------|--------|--------|---------|--------|-----------|
| SmallVesselStroke | MF0004 | MR Egger                  | 21 | 0.0824  | 0.0925 | 0.3838 | -0.0096 | 0.0110 | 0.3939 | 27.9807 | 0.0838 | 463.5529  |
| SmallVesselStroke | MF0004 | Weighted median           | 21 | 0.0348  | 0.0301 | 0.2467 | -0.0096 | 0.0110 | 0.3939 | 27.9807 | 0.0838 | 463.5529  |
| SmallVesselStroke | MF0004 | Inverse variance weighted | 21 | 0.0045  | 0.0237 | 0.8498 | -0.0096 | 0.0110 | 0.3939 | 27.9807 | 0.0838 | 463.5529  |
| SmallVesselStroke | MF0004 | Simple mode               | 21 | 0.0678  | 0.0534 | 0.2190 | -0.0096 | 0.0110 | 0.3939 | 27.9807 | 0.0838 | 463.5529  |
| SmallVesselStroke | MF0004 | Weighted mode             | 21 | 0.0703  | 0.0493 | 0.1693 | -0.0096 | 0.0110 | 0.3939 | 27.9807 | 0.0838 | 463.5529  |
| SmallVesselStroke | MF0005 | MR Egger                  | 21 | -0.0018 | 0.1519 | 0.9908 | -0.0004 | 0.0180 | 0.9830 | 31.0745 | 0.0396 | 121.1272  |
| SmallVesselStroke | MF0005 | Weighted median           | 21 | 0.0301  | 0.0473 | 0.5250 | -0.0004 | 0.0180 | 0.9830 | 31.0745 | 0.0396 | 121.1272  |
| SmallVesselStroke | MF0005 | Inverse variance weighted | 21 | -0.0050 | 0.0382 | 0.8969 | -0.0004 | 0.0180 | 0.9830 | 31.0745 | 0.0396 | 121.1272  |
| SmallVesselStroke | MF0005 | Simple mode               | 21 | 0.1318  | 0.1108 | 0.2480 | -0.0004 | 0.0180 | 0.9830 | 31.0745 | 0.0396 | 121.1272  |
| SmallVesselStroke | MF0005 | Weighted mode             | 21 | 0.1269  | 0.1003 | 0.2204 | -0.0004 | 0.0180 | 0.9830 | 31.0745 | 0.0396 | 121.1272  |
| SmallVesselStroke | MF0006 | MR Egger                  | 21 | 0.0811  | 0.0852 | 0.3530 | -0.0116 | 0.0101 | 0.2669 | 32.0412 | 0.0429 | 360.8070  |
| SmallVesselStroke | MF0006 | Weighted median           | 21 | 0.0186  | 0.0266 | 0.4828 | -0.0116 | 0.0101 | 0.2669 | 32.0412 | 0.0429 | 360.8070  |
| SmallVesselStroke | MF0006 | Inverse variance weighted | 21 | -0.0130 | 0.0221 | 0.5565 | -0.0116 | 0.0101 | 0.2669 | 32.0412 | 0.0429 | 360.8070  |
| SmallVesselStroke | MF0006 | Simple mode               | 21 | 0.0433  | 0.0476 | 0.3742 | -0.0116 | 0.0101 | 0.2669 | 32.0412 | 0.0429 | 360.8070  |
| SmallVesselStroke | MF0006 | Weighted mode             | 21 | 0.0445  | 0.0450 | 0.3344 | -0.0116 | 0.0101 | 0.2669 | 32.0412 | 0.0429 | 360.8070  |
| SmallVesselStroke | MF0007 | MR Egger                  | 21 | -0.1401 | 0.2212 | 0.5339 | 0.0199  | 0.0263 | 0.4583 | 14.3342 | 0.7639 | 158.4414  |
| SmallVesselStroke | MF0007 | Weighted median           | 21 | 0.0574  | 0.0800 | 0.4730 | 0.0199  | 0.0263 | 0.4583 | 14.3342 | 0.7639 | 158.4414  |
| SmallVesselStroke | MF0007 | Inverse variance weighted | 21 | 0.0216  | 0.0571 | 0.7047 | 0.0199  | 0.0263 | 0.4583 | 14.3342 | 0.7639 | 158.4414  |
| SmallVesselStroke | MF0007 | Simple mode               | 21 | 0.1387  | 0.1501 | 0.3666 | 0.0199  | 0.0263 | 0.4583 | 14.3342 | 0.7639 | 158.4414  |
| SmallVesselStroke | MF0007 | Weighted mode             | 21 | 0.1304  | 0.1443 | 0.3770 | 0.0199  | 0.0263 | 0.4583 | 14.3342 | 0.7639 | 158.4414  |
| SmallVesselStroke | MF0008 | MR Egger                  | 21 | -0.0135 | 0.0454 | 0.7695 | 0.0018  | 0.0054 | 0.7447 | 23.0237 | 0.2363 | 1140.2742 |
| SmallVesselStroke | MF0008 | Weighted median           | 21 | -0.0034 | 0.0153 | 0.8226 | 0.0018  | 0.0054 | 0.7447 | 23.0237 | 0.2363 | 1140.2742 |
| SmallVesselStroke | MF0008 | Inverse variance weighted | 21 | 0.0010  | 0.0115 | 0.9306 | 0.0018  | 0.0054 | 0.7447 | 23.0237 | 0.2363 | 1140.2742 |
| SmallVesselStroke | MF0008 | Simple mode               | 21 | 0.0125  | 0.0291 | 0.6719 | 0.0018  | 0.0054 | 0.7447 | 23.0237 | 0.2363 | 1140.2742 |
| SmallVesselStroke | MF0008 | Weighted mode             | 21 | 0.0019  | 0.0265 | 0.9422 | 0.0018  | 0.0054 | 0.7447 | 23.0237 | 0.2363 | 1140.2742 |
| SmallVesselStroke | MF0009 | MR Egger                  | 21 | 0.0582  | 0.0827 | 0.4901 | -0.0071 | 0.0098 | 0.4788 | 25.8016 | 0.1358 | 515.4395  |
| SmallVesselStroke | MF0009 | Weighted median           | 21 | -0.0214 | 0.0262 | 0.4139 | -0.0071 | 0.0098 | 0.4788 | 25.8016 | 0.1358 | 515.4395  |
| SmallVesselStroke | MF0009 | Inverse variance weighted | 21 | 0.0005  | 0.0211 | 0.9818 | -0.0071 | 0.0098 | 0.4788 | 25.8016 | 0.1358 | 515.4395  |
| SmallVesselStroke | MF0009 | Simple mode               | 21 | -0.0388 | 0.0452 | 0.4008 | -0.0071 | 0.0098 | 0.4788 | 25.8016 | 0.1358 | 515.4395  |
| SmallVesselStroke | MF0009 | Weighted mode             | 21 | -0.0350 | 0.0439 | 0.4346 | -0.0071 | 0.0098 | 0.4788 | 25.8016 | 0.1358 | 515.4395  |
| SmallVesselStroke | MF0010 | MR Egger                  | 21 | -0.0055 | 0.0469 | 0.9076 | 0.0017  | 0.0056 | 0.7577 | 26.5201 | 0.1163 | 1170.4109 |
| SmallVesselStroke | MF0010 | Weighted median           | 21 | 0.0117  | 0.0156 | 0.4507 | 0.0017  | 0.0056 | 0.7577 | 26.5201 | 0.1163 | 1170.4109 |
| SmallVesselStroke | MF0010 | Inverse variance weighted | 21 | 0.0087  | 0.0118 | 0.4638 | 0.0017  | 0.0056 | 0.7577 | 26.5201 | 0.1163 | 1170.4109 |
| SmallVesselStroke | MF0010 | Simple mode               | 21 | 0.0260  | 0.0326 | 0.4357 | 0.0017  | 0.0056 | 0.7577 | 26.5201 | 0.1163 | 1170.4109 |
| SmallVesselStroke | MF0010 | Weighted mode             | 21 | 0.0226  | 0.0307 | 0.4699 | 0.0017  | 0.0056 | 0.7577 | 26.5201 | 0.1163 | 1170.4109 |
| SmallVesselStroke | MF0011 | MR Egger                  | 21 | -0.0329 | 0.1673 | 0.8461 | 0.0085  | 0.0199 | 0.6741 | 21.4131 | 0.3144 | 171.6767  |
| SmallVesselStroke | MF0011 | Weighted median           | 21 | 0.0396  | 0.0572 | 0.4886 | 0.0085  | 0.0199 | 0.6741 | 21.4131 | 0.3144 | 171.6767  |
| SmallVesselStroke | MF0011 | Inverse variance weighted | 21 | 0.0361  | 0.0423 | 0.3931 | 0.0085  | 0.0199 | 0.6741 | 21.4131 | 0.3144 | 171.6767  |
| SmallVesselStroke | MF0011 | Simple mode               | 21 | 0.0072  | 0.1225 | 0.9537 | 0.0085  | 0.0199 | 0.6741 | 21.4131 | 0.3144 | 171.6767  |
| SmallVesselStroke | MF0011 | Weighted mode             | 21 | 0.0312  | 0.1132 | 0.7859 | 0.0085  | 0.0199 | 0.6741 | 21.4131 | 0.3144 | 171.6767  |
| SmallVesselStroke | MF0012 | MR Egger                  | 21 | -0.0620 | 0.2494 | 0.8062 | 0.0116  | 0.0296 | 0.6998 | 15.6392 | 0.6812 | 119.3344  |
| SmallVesselStroke | MF0012 | Weighted median           | 21 | 0.0510  | 0.0863 | 0.5551 | 0.0116  | 0.0296 | 0.6998 | 15.6392 | 0.6812 | 119.3344  |
| SmallVesselStroke | MF0012 | Inverse variance weighted | 21 | 0.0323  | 0.0644 | 0.6160 | 0.0116  | 0.0296 | 0.6998 | 15.6392 | 0.6812 | 119.3344  |
| SmallVesselStroke | MF0012 | Simple mode               | 21 | 0.0712  | 0.1611 | 0.6633 | 0.0116  | 0.0296 | 0.6998 | 15.6392 | 0.6812 | 119.3344  |
| SmallVesselStroke | MF0012 | Weighted mode             | 21 | 0.0915  | 0.1480 | 0.5435 | 0.0116  | 0.0296 | 0.6998 | 15.6392 | 0.6812 | 119.3344  |
| SmallVesselStroke | MF0013 | MR Egger                  | 21 | -0.0151 | 0.0368 | 0.6866 | 0.0014  | 0.0044 | 0.7444 | 18.1871 | 0.5100 | 1347.3084 |
| SmallVesselStroke | MF0013 | Weighted median           | 21 | 0.0042  | 0.0133 | 0.7501 | 0.0014  | 0.0044 | 0.7444 | 18.1871 | 0.5100 | 1347.3084 |
| SmallVesselStroke | MF0013 | Inverse variance weighted | 21 | -0.0033 | 0.0095 | 0.7268 | 0.0014  | 0.0044 | 0.7444 | 18.1871 | 0.5100 | 1347.3084 |
| SmallVesselStroke | MF0013 | Simple mode               | 21 | 0.0055  | 0.0253 | 0.8296 | 0.0014  | 0.0044 | 0.7444 | 18.1871 | 0.5100 | 1347.3084 |
| SmallVesselStroke | MF0013 | Weighted mode             | 21 | 0.0038  | 0.0233 | 0.8728 | 0.0014  | 0.0044 | 0.7444 | 18.1871 | 0.5100 | 1347.3084 |
| SmallVesselStroke | MF0014 | MR Egger                  | 21 | -0.1132 | 0.0900 | 0.2236 | 0.0151  | 0.0107 | 0.1737 | 24.5637 | 0.2186 | 293.8314  |
| SmallVesselStroke | MF0014 | Weighted median           | 21 | 0.0173  | 0.0312 | 0.5778 | 0.0151  | 0.0107 | 0.1737 | 24.5637 | 0.2186 | 293.8314  |
| SmallVesselStroke | MF0014 | Inverse variance weighted | 21 | 0.0096  | 0.0238 | 0.6852 | 0.0151  | 0.0107 | 0.1737 | 24.5637 | 0.2186 | 293.8314  |
| SmallVesselStroke | MF0014 | Simple mode               | 21 | 0.0557  | 0.0597 | 0.3620 | 0.0151  | 0.0107 | 0.1737 | 24.5637 | 0.2186 | 293.8314  |
| SmallVesselStroke | MF0014 | Weighted mode             | 21 | 0.0430  | 0.0538 | 0.4330 | 0.0151  | 0.0107 | 0.1737 | 24.5637 | 0.2186 | 293.8314  |
| SmallVesselStroke | MF0015 | MR Egger                  | 21 | 0.0512  | 0.1828 | 0.7827 | 0.0018  | 0.0217 | 0.9332 | 22.6527 | 0.2530 | 154.5955  |
| SmallVesselStroke | MF0015 | Weighted median           | 21 | 0.0008  | 0.0641 | 0.9905 | 0.0018  | 0.0217 | 0.9332 | 22.6527 | 0.2530 | 154.5955  |
| SmallVesselStroke | MF0015 | Inverse variance weighted | 21 | 0.0662  | 0.0460 | 0.1503 | 0.0018  | 0.0217 | 0.9332 | 22.6527 | 0.2530 | 154.5955  |
| SmallVesselStroke | MF0015 | Simple mode               | 21 | -0.0470 | 0.1285 | 0.7181 | 0.0018  | 0.0217 | 0.9332 | 22.6527 | 0.2530 | 154.5955  |
| SmallVesselStroke | MF0015 | Weighted mode             | 21 | -0.0498 | 0.1294 | 0.7046 | 0.0018  | 0.0217 | 0.9332 | 22.6527 | 0.2530 | 154.5955  |
| SmallVesselStroke | MF0016 | MR Egger                  | 21 | 0.1354  | 0.1381 | 0.3392 | -0.0157 | 0.0164 | 0.3495 | 15.7096 | 0.7345 | 203.1427  |

|                   |        |                           |    |         |        |        |         |        |        |         |        |           |
|-------------------|--------|---------------------------|----|---------|--------|--------|---------|--------|--------|---------|--------|-----------|
| SmallVesselStroke | MF0016 | Weighted median           | 21 | 0.0292  | 0.0497 | 0.5576 | -0.0157 | 0.0164 | 0.3495 | 15.7096 | 0.7345 | 203.1427  |
| SmallVesselStroke | MF0016 | Inverse variance weighted | 21 | 0.0074  | 0.0356 | 0.8349 | -0.0157 | 0.0164 | 0.3495 | 15.7096 | 0.7345 | 203.1427  |
| SmallVesselStroke | MF0016 | Simple mode               | 21 | 0.0505  | 0.0899 | 0.5805 | -0.0157 | 0.0164 | 0.3495 | 15.7096 | 0.7345 | 203.1427  |
| SmallVesselStroke | MF0016 | Weighted mode             | 21 | 0.0466  | 0.0877 | 0.6012 | -0.0157 | 0.0164 | 0.3495 | 15.7096 | 0.7345 | 203.1427  |
| SmallVesselStroke | MF0017 | MR Egger                  | 21 | -0.0222 | 0.0426 | 0.6086 | 0.0022  | 0.0051 | 0.6748 | 20.3630 | 0.3730 | 1311.3845 |
| SmallVesselStroke | MF0017 | Weighted median           | 21 | -0.0064 | 0.0149 | 0.6678 | 0.0022  | 0.0051 | 0.6748 | 20.3630 | 0.3730 | 1311.3845 |
| SmallVesselStroke | MF0017 | Inverse variance weighted | 21 | -0.0046 | 0.0108 | 0.6660 | 0.0022  | 0.0051 | 0.6748 | 20.3630 | 0.3730 | 1311.3845 |
| SmallVesselStroke | MF0017 | Simple mode               | 21 | 0.0009  | 0.0279 | 0.9741 | 0.0022  | 0.0051 | 0.6748 | 20.3630 | 0.3730 | 1311.3845 |
| SmallVesselStroke | MF0017 | Weighted mode             | 21 | -0.0003 | 0.0260 | 0.9904 | 0.0022  | 0.0051 | 0.6748 | 20.3630 | 0.3730 | 1311.3845 |
| SmallVesselStroke | MF0018 | MR Egger                  | 21 | -0.0523 | 0.0586 | 0.3833 | 0.0046  | 0.0070 | 0.5178 | 30.4073 | 0.0468 | 575.5377  |
| SmallVesselStroke | MF0018 | Weighted median           | 21 | 0.0078  | 0.0183 | 0.6694 | 0.0046  | 0.0070 | 0.5178 | 30.4073 | 0.0468 | 575.5377  |
| SmallVesselStroke | MF0018 | Inverse variance weighted | 21 | -0.0150 | 0.0149 | 0.3147 | 0.0046  | 0.0070 | 0.5178 | 30.4073 | 0.0468 | 575.5377  |
| SmallVesselStroke | MF0018 | Simple mode               | 21 | 0.0050  | 0.0368 | 0.8932 | 0.0046  | 0.0070 | 0.5178 | 30.4073 | 0.0468 | 575.5377  |
| SmallVesselStroke | MF0018 | Weighted mode             | 21 | 0.0076  | 0.0324 | 0.8164 | 0.0046  | 0.0070 | 0.5178 | 30.4073 | 0.0468 | 575.5377  |
| SmallVesselStroke | MF0019 | MR Egger                  | 21 | 0.0450  | 0.1312 | 0.7353 | -0.0057 | 0.0156 | 0.7207 | 31.3013 | 0.0374 | 317.4250  |
| SmallVesselStroke | MF0019 | Weighted median           | 21 | 0.0597  | 0.0415 | 0.1501 | -0.0057 | 0.0156 | 0.7207 | 31.3013 | 0.0374 | 317.4250  |
| SmallVesselStroke | MF0019 | Inverse variance weighted | 21 | -0.0010 | 0.0331 | 0.9765 | -0.0057 | 0.0156 | 0.7207 | 31.3013 | 0.0374 | 317.4250  |
| SmallVesselStroke | MF0019 | Simple mode               | 21 | 0.0822  | 0.0759 | 0.2916 | -0.0057 | 0.0156 | 0.7207 | 31.3013 | 0.0374 | 317.4250  |
| SmallVesselStroke | MF0019 | Weighted mode             | 21 | 0.0744  | 0.0642 | 0.2603 | -0.0057 | 0.0156 | 0.7207 | 31.3013 | 0.0374 | 317.4250  |
| SmallVesselStroke | MF0020 | MR Egger                  | 21 | 0.0605  | 0.2127 | 0.7790 | -0.0056 | 0.0253 | 0.8269 | 34.9908 | 0.0140 | 108.7275  |
| SmallVesselStroke | MF0020 | Weighted median           | 21 | 0.0281  | 0.0626 | 0.6534 | -0.0056 | 0.0253 | 0.8269 | 34.9908 | 0.0140 | 108.7275  |
| SmallVesselStroke | MF0020 | Inverse variance weighted | 21 | 0.0150  | 0.0536 | 0.7798 | -0.0056 | 0.0253 | 0.8269 | 34.9908 | 0.0140 | 108.7275  |
| SmallVesselStroke | MF0020 | Simple mode               | 21 | 0.1495  | 0.1560 | 0.3493 | -0.0056 | 0.0253 | 0.8269 | 34.9908 | 0.0140 | 108.7275  |
| SmallVesselStroke | MF0020 | Weighted mode             | 21 | 0.1529  | 0.1225 | 0.2265 | -0.0056 | 0.0253 | 0.8269 | 34.9908 | 0.0140 | 108.7275  |
| SmallVesselStroke | MF0021 | MR Egger                  | 21 | 0.0336  | 0.0684 | 0.6287 | -0.0029 | 0.0081 | 0.7250 | 21.5186 | 0.3089 | 586.0651  |
| SmallVesselStroke | MF0021 | Weighted median           | 21 | 0.0316  | 0.0227 | 0.1632 | -0.0029 | 0.0081 | 0.7250 | 21.5186 | 0.3089 | 586.0651  |
| SmallVesselStroke | MF0021 | Inverse variance weighted | 21 | 0.0100  | 0.0173 | 0.5615 | -0.0029 | 0.0081 | 0.7250 | 21.5186 | 0.3089 | 586.0651  |
| SmallVesselStroke | MF0021 | Simple mode               | 21 | 0.0395  | 0.0433 | 0.3731 | -0.0029 | 0.0081 | 0.7250 | 21.5186 | 0.3089 | 586.0651  |
| SmallVesselStroke | MF0021 | Weighted mode             | 21 | 0.0449  | 0.0435 | 0.3147 | -0.0029 | 0.0081 | 0.7250 | 21.5186 | 0.3089 | 586.0651  |
| SmallVesselStroke | MF0022 | MR Egger                  | 21 | 0.0577  | 0.0618 | 0.3620 | -0.0052 | 0.0073 | 0.4899 | 19.8906 | 0.4012 | 501.7942  |
| SmallVesselStroke | MF0022 | Weighted median           | 21 | 0.0232  | 0.0227 | 0.3067 | -0.0052 | 0.0073 | 0.4899 | 19.8906 | 0.4012 | 501.7942  |
| SmallVesselStroke | MF0022 | Inverse variance weighted | 21 | 0.0157  | 0.0158 | 0.3194 | -0.0052 | 0.0073 | 0.4899 | 19.8906 | 0.4012 | 501.7942  |
| SmallVesselStroke | MF0022 | Simple mode               | 21 | 0.0282  | 0.0437 | 0.5267 | -0.0052 | 0.0073 | 0.4899 | 19.8906 | 0.4012 | 501.7942  |
| SmallVesselStroke | MF0022 | Weighted mode             | 21 | 0.0234  | 0.0387 | 0.5514 | -0.0052 | 0.0073 | 0.4899 | 19.8906 | 0.4012 | 501.7942  |
| SmallVesselStroke | MF0024 | MR Egger                  | 21 | -0.0562 | 0.5345 | 0.9173 | 0.0136  | 0.0635 | 0.8322 | 18.8191 | 0.4685 | 8.7122    |
| SmallVesselStroke | MF0024 | Weighted median           | 21 | 0.0326  | 0.1857 | 0.8607 | 0.0136  | 0.0635 | 0.8322 | 18.8191 | 0.4685 | 8.7122    |
| SmallVesselStroke | MF0024 | Inverse variance weighted | 21 | 0.0547  | 0.1380 | 0.6917 | 0.0136  | 0.0635 | 0.8322 | 18.8191 | 0.4685 | 8.7122    |
| SmallVesselStroke | MF0024 | Simple mode               | 21 | 0.0740  | 0.3395 | 0.8298 | 0.0136  | 0.0635 | 0.8322 | 18.8191 | 0.4685 | 8.7122    |
| SmallVesselStroke | MF0024 | Weighted mode             | 21 | 0.1069  | 0.3194 | 0.7414 | 0.0136  | 0.0635 | 0.8322 | 18.8191 | 0.4685 | 8.7122    |
| SmallVesselStroke | MF0025 | MR Egger                  | 21 | 0.0712  | 0.2748 | 0.7985 | -0.0079 | 0.0326 | 0.8120 | 21.5745 | 0.3059 | 95.1390   |
| SmallVesselStroke | MF0025 | Weighted median           | 21 | 0.0494  | 0.0919 | 0.5905 | -0.0079 | 0.0326 | 0.8120 | 21.5745 | 0.3059 | 95.1390   |
| SmallVesselStroke | MF0025 | Inverse variance weighted | 21 | 0.0071  | 0.0692 | 0.9181 | -0.0079 | 0.0326 | 0.8120 | 21.5745 | 0.3059 | 95.1390   |
| SmallVesselStroke | MF0025 | Simple mode               | 21 | 0.1099  | 0.1585 | 0.4960 | -0.0079 | 0.0326 | 0.8120 | 21.5745 | 0.3059 | 95.1390   |
| SmallVesselStroke | MF0025 | Weighted mode             | 21 | 0.1141  | 0.1426 | 0.4329 | -0.0079 | 0.0326 | 0.8120 | 21.5745 | 0.3059 | 95.1390   |
| SmallVesselStroke | MF0026 | MR Egger                  | 21 | 0.0251  | 0.0542 | 0.6482 | -0.0027 | 0.0064 | 0.6744 | 27.1063 | 0.1022 | 926.4277  |
| SmallVesselStroke | MF0026 | Weighted median           | 21 | 0.0269  | 0.0174 | 0.1223 | -0.0027 | 0.0064 | 0.6744 | 27.1063 | 0.1022 | 926.4277  |
| SmallVesselStroke | MF0026 | Inverse variance weighted | 21 | 0.0028  | 0.0137 | 0.8391 | -0.0027 | 0.0064 | 0.6744 | 27.1063 | 0.1022 | 926.4277  |
| SmallVesselStroke | MF0026 | Simple mode               | 21 | 0.0413  | 0.0293 | 0.1733 | -0.0027 | 0.0064 | 0.6744 | 27.1063 | 0.1022 | 926.4277  |
| SmallVesselStroke | MF0026 | Weighted mode             | 21 | 0.0397  | 0.0277 | 0.1673 | -0.0027 | 0.0064 | 0.6744 | 27.1063 | 0.1022 | 926.4277  |
| SmallVesselStroke | MF0027 | MR Egger                  | 21 | -0.4538 | 0.3551 | 0.2167 | 0.0737  | 0.0422 | 0.0970 | 25.0690 | 0.1988 | 48.3954   |
| SmallVesselStroke | MF0027 | Weighted median           | 21 | 0.1052  | 0.1266 | 0.4061 | 0.0737  | 0.0422 | 0.0970 | 25.0690 | 0.1988 | 48.3954   |
| SmallVesselStroke | MF0027 | Inverse variance weighted | 21 | 0.1452  | 0.0962 | 0.1312 | 0.0737  | 0.0422 | 0.0970 | 25.0690 | 0.1988 | 48.3954   |
| SmallVesselStroke | MF0027 | Simple mode               | 21 | 0.1580  | 0.2624 | 0.5540 | 0.0737  | 0.0422 | 0.0970 | 25.0690 | 0.1988 | 48.3954   |
| SmallVesselStroke | MF0027 | Weighted mode             | 21 | 0.1580  | 0.2527 | 0.5390 | 0.0737  | 0.0422 | 0.0970 | 25.0690 | 0.1988 | 48.3954   |
| SmallVesselStroke | MF0028 | MR Egger                  | 21 | 0.1113  | 0.0929 | 0.2455 | -0.0132 | 0.0110 | 0.2472 | 37.2653 | 0.0109 | 397.4803  |
| SmallVesselStroke | MF0028 | Weighted median           | 21 | -0.0037 | 0.0263 | 0.8884 | -0.0132 | 0.0110 | 0.2472 | 37.2653 | 0.0109 | 397.4803  |
| SmallVesselStroke | MF0028 | Inverse variance weighted | 21 | 0.0042  | 0.0242 | 0.8631 | -0.0132 | 0.0110 | 0.2472 | 37.2653 | 0.0109 | 397.4803  |
| SmallVesselStroke | MF0028 | Simple mode               | 21 | 0.0316  | 0.0515 | 0.5469 | -0.0132 | 0.0110 | 0.2472 | 37.2653 | 0.0109 | 397.4803  |
| SmallVesselStroke | MF0028 | Weighted mode             | 21 | 0.0028  | 0.0444 | 0.9501 | -0.0132 | 0.0110 | 0.2472 | 37.2653 | 0.0109 | 397.4803  |
| SmallVesselStroke | MF0029 | MR Egger                  | 21 | 0.1319  | 0.1264 | 0.3100 | -0.0146 | 0.0150 | 0.3422 | 20.0943 | 0.3889 | 151.4166  |
| SmallVesselStroke | MF0029 | Weighted median           | 21 | 0.0051  | 0.0451 | 0.9098 | -0.0146 | 0.0150 | 0.3422 | 20.0943 | 0.3889 | 151.4166  |

|                   |        |                           |    |         |        |        |         |        |        |         |        |          |
|-------------------|--------|---------------------------|----|---------|--------|--------|---------|--------|--------|---------|--------|----------|
| SmallVesselStroke | MF0029 | Inverse variance weighted | 21 | 0.0129  | 0.0326 | 0.6928 | -0.0146 | 0.0150 | 0.3422 | 20.0943 | 0.3889 | 151.4166 |
| SmallVesselStroke | MF0029 | Simple mode               | 21 | -0.0387 | 0.0789 | 0.6288 | -0.0146 | 0.0150 | 0.3422 | 20.0943 | 0.3889 | 151.4166 |
| SmallVesselStroke | MF0029 | Weighted mode             | 21 | -0.0150 | 0.0796 | 0.8527 | -0.0146 | 0.0150 | 0.3422 | 20.0943 | 0.3889 | 151.4166 |
| SmallVesselStroke | MF0030 | MR Egger                  | 21 | 0.2503  | 0.1948 | 0.2144 | -0.0290 | 0.0231 | 0.2258 | 16.0343 | 0.7145 | 144.0339 |
| SmallVesselStroke | MF0030 | Weighted median           | 21 | 0.0770  | 0.0682 | 0.2592 | -0.0290 | 0.0231 | 0.2258 | 16.0343 | 0.7145 | 144.0339 |
| SmallVesselStroke | MF0030 | Inverse variance weighted | 21 | 0.0146  | 0.0503 | 0.7709 | -0.0290 | 0.0231 | 0.2258 | 16.0343 | 0.7145 | 144.0339 |
| SmallVesselStroke | MF0030 | Simple mode               | 21 | 0.1142  | 0.1287 | 0.3855 | -0.0290 | 0.0231 | 0.2258 | 16.0343 | 0.7145 | 144.0339 |
| SmallVesselStroke | MF0030 | Weighted mode             | 21 | 0.1116  | 0.1266 | 0.3886 | -0.0290 | 0.0231 | 0.2258 | 16.0343 | 0.7145 | 144.0339 |
| SmallVesselStroke | MF0031 | MR Egger                  | 21 | 0.2112  | 0.3239 | 0.5221 | -0.0194 | 0.0385 | 0.6193 | 26.6627 | 0.1128 | 57.1859  |
| SmallVesselStroke | MF0031 | Weighted median           | 21 | -0.0036 | 0.1016 | 0.9715 | -0.0194 | 0.0385 | 0.6193 | 26.6627 | 0.1128 | 57.1859  |
| SmallVesselStroke | MF0031 | Inverse variance weighted | 21 | 0.0532  | 0.0820 | 0.5168 | -0.0194 | 0.0385 | 0.6193 | 26.6627 | 0.1128 | 57.1859  |
| SmallVesselStroke | MF0031 | Simple mode               | 21 | -0.1654 | 0.2087 | 0.4374 | -0.0194 | 0.0385 | 0.6193 | 26.6627 | 0.1128 | 57.1859  |
| SmallVesselStroke | MF0031 | Weighted mode             | 21 | 0.2287  | 0.1875 | 0.2368 | -0.0194 | 0.0385 | 0.6193 | 26.6627 | 0.1128 | 57.1859  |
| SmallVesselStroke | MF0032 | MR Egger                  | 21 | -0.3167 | 0.4759 | 0.5137 | 0.0268  | 0.0565 | 0.6407 | 20.2221 | 0.3813 | 32.6041  |
| SmallVesselStroke | MF0032 | Weighted median           | 21 | -0.1330 | 0.1661 | 0.4235 | 0.0268  | 0.0565 | 0.6407 | 20.2221 | 0.3813 | 32.6041  |
| SmallVesselStroke | MF0032 | Inverse variance weighted | 21 | -0.0986 | 0.1204 | 0.4125 | 0.0268  | 0.0565 | 0.6407 | 20.2221 | 0.3813 | 32.6041  |
| SmallVesselStroke | MF0032 | Simple mode               | 21 | -0.1096 | 0.2714 | 0.6906 | 0.0268  | 0.0565 | 0.6407 | 20.2221 | 0.3813 | 32.6041  |
| SmallVesselStroke | MF0032 | Weighted mode             | 21 | -0.1172 | 0.2733 | 0.6726 | 0.0268  | 0.0565 | 0.6407 | 20.2221 | 0.3813 | 32.6041  |
| SmallVesselStroke | MF0033 | MR Egger                  | 21 | 0.0049  | 0.0579 | 0.9330 | -0.0010 | 0.0069 | 0.8813 | 34.6743 | 0.0153 | 827.8733 |
| SmallVesselStroke | MF0033 | Weighted median           | 21 | -0.0064 | 0.0160 | 0.6874 | -0.0010 | 0.0069 | 0.8813 | 34.6743 | 0.0153 | 827.8733 |
| SmallVesselStroke | MF0033 | Inverse variance weighted | 21 | -0.0035 | 0.0146 | 0.8085 | -0.0010 | 0.0069 | 0.8813 | 34.6743 | 0.0153 | 827.8733 |
| SmallVesselStroke | MF0033 | Simple mode               | 21 | -0.0107 | 0.0272 | 0.6991 | -0.0010 | 0.0069 | 0.8813 | 34.6743 | 0.0153 | 827.8733 |
| SmallVesselStroke | MF0033 | Weighted mode             | 21 | -0.0055 | 0.0267 | 0.8383 | -0.0010 | 0.0069 | 0.8813 | 34.6743 | 0.0153 | 827.8733 |
| SmallVesselStroke | MF0034 | MR Egger                  | 21 | 0.1439  | 0.1391 | 0.3141 | -0.0103 | 0.0165 | 0.5399 | 21.8353 | 0.2925 | 217.2615 |
| SmallVesselStroke | MF0034 | Weighted median           | 21 | 0.0462  | 0.0479 | 0.3345 | -0.0103 | 0.0165 | 0.5399 | 21.8353 | 0.2925 | 217.2615 |
| SmallVesselStroke | MF0034 | Inverse variance weighted | 21 | 0.0600  | 0.0354 | 0.0899 | -0.0103 | 0.0165 | 0.5399 | 21.8353 | 0.2925 | 217.2615 |
| SmallVesselStroke | MF0034 | Simple mode               | 21 | 0.0213  | 0.0953 | 0.8257 | -0.0103 | 0.0165 | 0.5399 | 21.8353 | 0.2925 | 217.2615 |
| SmallVesselStroke | MF0034 | Weighted mode             | 21 | 0.0171  | 0.0916 | 0.8536 | -0.0103 | 0.0165 | 0.5399 | 21.8353 | 0.2925 | 217.2615 |
| SmallVesselStroke | MF0035 | MR Egger                  | 21 | -0.0351 | 0.2365 | 0.8835 | 0.0051  | 0.0281 | 0.8572 | 35.1149 | 0.0135 | 67.9971  |
| SmallVesselStroke | MF0035 | Weighted median           | 21 | 0.0299  | 0.0686 | 0.6623 | 0.0051  | 0.0281 | 0.8572 | 35.1149 | 0.0135 | 67.9971  |
| SmallVesselStroke | MF0035 | Inverse variance weighted | 21 | 0.0065  | 0.0595 | 0.9124 | 0.0051  | 0.0281 | 0.8572 | 35.1149 | 0.0135 | 67.9971  |
| SmallVesselStroke | MF0035 | Simple mode               | 21 | 0.1173  | 0.1289 | 0.3736 | 0.0051  | 0.0281 | 0.8572 | 35.1149 | 0.0135 | 67.9971  |
| SmallVesselStroke | MF0035 | Weighted mode             | 21 | 0.1018  | 0.1118 | 0.3732 | 0.0051  | 0.0281 | 0.8572 | 35.1149 | 0.0135 | 67.9971  |
| SmallVesselStroke | MF0036 | MR Egger                  | 21 | -0.0871 | 0.1477 | 0.5622 | 0.0123  | 0.0175 | 0.4904 | 27.9142 | 0.0851 | 236.7904 |
| SmallVesselStroke | MF0036 | Weighted median           | 21 | 0.0334  | 0.0456 | 0.4648 | 0.0123  | 0.0175 | 0.4904 | 27.9142 | 0.0851 | 236.7904 |
| SmallVesselStroke | MF0036 | Inverse variance weighted | 21 | 0.0132  | 0.0376 | 0.7251 | 0.0123  | 0.0175 | 0.4904 | 27.9142 | 0.0851 | 236.7904 |
| SmallVesselStroke | MF0036 | Simple mode               | 21 | 0.0272  | 0.0769 | 0.7269 | 0.0123  | 0.0175 | 0.4904 | 27.9142 | 0.0851 | 236.7904 |
| SmallVesselStroke | MF0036 | Weighted mode             | 21 | 0.0425  | 0.0765 | 0.5849 | 0.0123  | 0.0175 | 0.4904 | 27.9142 | 0.0851 | 236.7904 |
| SmallVesselStroke | MF0037 | MR Egger                  | 21 | -0.0439 | 0.3013 | 0.8856 | 0.0040  | 0.0358 | 0.9122 | 38.5816 | 0.0050 | 26.0922  |
| SmallVesselStroke | MF0037 | Weighted median           | 21 | 0.0317  | 0.0829 | 0.7022 | 0.0040  | 0.0358 | 0.9122 | 38.5816 | 0.0050 | 26.0922  |
| SmallVesselStroke | MF0037 | Inverse variance weighted | 21 | -0.0114 | 0.0758 | 0.8807 | 0.0040  | 0.0358 | 0.9122 | 38.5816 | 0.0050 | 26.0922  |
| SmallVesselStroke | MF0037 | Simple mode               | 21 | 0.0989  | 0.1757 | 0.5797 | 0.0040  | 0.0358 | 0.9122 | 38.5816 | 0.0050 | 26.0922  |
| SmallVesselStroke | MF0037 | Weighted mode             | 21 | 0.0733  | 0.1419 | 0.6110 | 0.0040  | 0.0358 | 0.9122 | 38.5816 | 0.0050 | 26.0922  |
| SmallVesselStroke | MF0038 | MR Egger                  | 21 | -0.0609 | 0.0622 | 0.3396 | 0.0061  | 0.0074 | 0.4194 | 22.1805 | 0.2754 | 903.5442 |
| SmallVesselStroke | MF0038 | Weighted median           | 21 | -0.0330 | 0.0208 | 0.1123 | 0.0061  | 0.0074 | 0.4194 | 22.1805 | 0.2754 | 903.5442 |
| SmallVesselStroke | MF0038 | Inverse variance weighted | 21 | -0.0113 | 0.0159 | 0.4763 | 0.0061  | 0.0074 | 0.4194 | 22.1805 | 0.2754 | 903.5442 |
| SmallVesselStroke | MF0038 | Simple mode               | 21 | -0.0354 | 0.0390 | 0.3737 | 0.0061  | 0.0074 | 0.4194 | 22.1805 | 0.2754 | 903.5442 |
| SmallVesselStroke | MF0038 | Weighted mode             | 21 | -0.0370 | 0.0357 | 0.3124 | 0.0061  | 0.0074 | 0.4194 | 22.1805 | 0.2754 | 903.5442 |
| SmallVesselStroke | MF0039 | MR Egger                  | 21 | 0.1349  | 0.2840 | 0.6401 | -0.0127 | 0.0337 | 0.7102 | 17.0251 | 0.5882 | 70.4434  |
| SmallVesselStroke | MF0039 | Weighted median           | 21 | 0.0716  | 0.1041 | 0.4916 | -0.0127 | 0.0337 | 0.7102 | 17.0251 | 0.5882 | 70.4434  |
| SmallVesselStroke | MF0039 | Inverse variance weighted | 21 | 0.0314  | 0.0733 | 0.6681 | -0.0127 | 0.0337 | 0.7102 | 17.0251 | 0.5882 | 70.4434  |
| SmallVesselStroke | MF0039 | Simple mode               | 21 | 0.1454  | 0.1991 | 0.4739 | -0.0127 | 0.0337 | 0.7102 | 17.0251 | 0.5882 | 70.4434  |
| SmallVesselStroke | MF0039 | Weighted mode             | 21 | 0.1418  | 0.2065 | 0.5002 | -0.0127 | 0.0337 | 0.7102 | 17.0251 | 0.5882 | 70.4434  |
| SmallVesselStroke | MF0040 | MR Egger                  | 21 | -0.0103 | 0.3961 | 0.9795 | 0.0028  | 0.0471 | 0.9525 | 34.6493 | 0.0154 | 16.5840  |
| SmallVesselStroke | MF0040 | Weighted median           | 21 | 0.0759  | 0.1150 | 0.5092 | 0.0028  | 0.0471 | 0.9525 | 34.6493 | 0.0154 | 16.5840  |
| SmallVesselStroke | MF0040 | Inverse variance weighted | 21 | 0.0128  | 0.0997 | 0.8978 | 0.0028  | 0.0471 | 0.9525 | 34.6493 | 0.0154 | 16.5840  |
| SmallVesselStroke | MF0040 | Simple mode               | 21 | 0.1431  | 0.2183 | 0.5195 | 0.0028  | 0.0471 | 0.9525 | 34.6493 | 0.0154 | 16.5840  |
| SmallVesselStroke | MF0040 | Weighted mode             | 21 | 0.1560  | 0.1853 | 0.4097 | 0.0028  | 0.0471 | 0.9525 | 34.6493 | 0.0154 | 16.5840  |
| SmallVesselStroke | MF0041 | MR Egger                  | 21 | -0.2835 | 0.1869 | 0.1458 | 0.0358  | 0.0222 | 0.1232 | 34.7574 | 0.0214 | 131.7449 |
| SmallVesselStroke | MF0041 | Weighted median           | 21 | -0.0081 | 0.0551 | 0.8835 | 0.0358  | 0.0222 | 0.1232 | 34.7574 | 0.0214 | 131.7449 |
| SmallVesselStroke | MF0041 | Inverse variance weighted | 21 | 0.0077  | 0.0501 | 0.8772 | 0.0358  | 0.0222 | 0.1232 | 34.7574 | 0.0214 | 131.7449 |

|                   |        |                           |    |         |        |        |         |        |        |         |        |          |
|-------------------|--------|---------------------------|----|---------|--------|--------|---------|--------|--------|---------|--------|----------|
| SmallVesselStroke | MF0041 | Simple mode               | 21 | -0.0337 | 0.0950 | 0.7267 | 0.0358  | 0.0222 | 0.1232 | 34.7574 | 0.0214 | 131.7449 |
| SmallVesselStroke | MF0041 | Weighted mode             | 21 | -0.0243 | 0.0906 | 0.7910 | 0.0358  | 0.0222 | 0.1232 | 34.7574 | 0.0214 | 131.7449 |
| SmallVesselStroke | MF0043 | MR Egger                  | 21 | 0.0220  | 0.1652 | 0.8953 | -0.0001 | 0.0196 | 0.9960 | 19.5923 | 0.4195 | 216.0535 |
| SmallVesselStroke | MF0043 | Weighted median           | 21 | 0.0601  | 0.0608 | 0.3227 | -0.0001 | 0.0196 | 0.9960 | 19.5923 | 0.4195 | 216.0535 |
| SmallVesselStroke | MF0043 | Inverse variance weighted | 21 | 0.0212  | 0.0420 | 0.6133 | -0.0001 | 0.0196 | 0.9960 | 19.5923 | 0.4195 | 216.0535 |
| SmallVesselStroke | MF0043 | Simple mode               | 21 | 0.1327  | 0.1219 | 0.2894 | -0.0001 | 0.0196 | 0.9960 | 19.5923 | 0.4195 | 216.0535 |
| SmallVesselStroke | MF0043 | Weighted mode             | 21 | 0.1378  | 0.1224 | 0.2735 | -0.0001 | 0.0196 | 0.9960 | 19.5923 | 0.4195 | 216.0535 |
| SmallVesselStroke | MF0044 | MR Egger                  | 21 | 0.0163  | 0.0476 | 0.7352 | -0.0020 | 0.0057 | 0.7226 | 9.7359  | 0.9592 | 995.0185 |
| SmallVesselStroke | MF0044 | Weighted median           | 21 | -0.0040 | 0.0163 | 0.8063 | -0.0020 | 0.0057 | 0.7226 | 9.7359  | 0.9592 | 995.0185 |
| SmallVesselStroke | MF0044 | Inverse variance weighted | 21 | -0.0002 | 0.0123 | 0.9852 | -0.0020 | 0.0057 | 0.7226 | 9.7359  | 0.9592 | 995.0185 |
| SmallVesselStroke | MF0044 | Simple mode               | 21 | -0.0013 | 0.0274 | 0.9633 | -0.0020 | 0.0057 | 0.7226 | 9.7359  | 0.9592 | 995.0185 |
| SmallVesselStroke | MF0044 | Weighted mode             | 21 | -0.0064 | 0.0279 | 0.8221 | -0.0020 | 0.0057 | 0.7226 | 9.7359  | 0.9592 | 995.0185 |
| SmallVesselStroke | MF0045 | MR Egger                  | 21 | 0.0674  | 0.0773 | 0.3938 | -0.0081 | 0.0092 | 0.3885 | 28.9365 | 0.0670 | 498.1301 |
| SmallVesselStroke | MF0045 | Weighted median           | 21 | 0.0074  | 0.0231 | 0.7471 | -0.0081 | 0.0092 | 0.3885 | 28.9365 | 0.0670 | 498.1301 |
| SmallVesselStroke | MF0045 | Inverse variance weighted | 21 | 0.0015  | 0.0198 | 0.9386 | -0.0081 | 0.0092 | 0.3885 | 28.9365 | 0.0670 | 498.1301 |
| SmallVesselStroke | MF0045 | Simple mode               | 21 | 0.0043  | 0.0486 | 0.9310 | -0.0081 | 0.0092 | 0.3885 | 28.9365 | 0.0670 | 498.1301 |
| SmallVesselStroke | MF0045 | Weighted mode             | 21 | 0.0007  | 0.0428 | 0.9870 | -0.0081 | 0.0092 | 0.3885 | 28.9365 | 0.0670 | 498.1301 |
| SmallVesselStroke | MF0046 | MR Egger                  | 21 | 0.0977  | 0.2825 | 0.7332 | -0.0083 | 0.0336 | 0.8074 | 29.0499 | 0.0652 | 54.9329  |
| SmallVesselStroke | MF0046 | Weighted median           | 21 | 0.0122  | 0.0935 | 0.8962 | -0.0083 | 0.0336 | 0.8074 | 29.0499 | 0.0652 | 54.9329  |
| SmallVesselStroke | MF0046 | Inverse variance weighted | 21 | 0.0303  | 0.0712 | 0.6705 | -0.0083 | 0.0336 | 0.8074 | 29.0499 | 0.0652 | 54.9329  |
| SmallVesselStroke | MF0046 | Simple mode               | 21 | 0.0735  | 0.1771 | 0.6826 | -0.0083 | 0.0336 | 0.8074 | 29.0499 | 0.0652 | 54.9329  |
| SmallVesselStroke | MF0046 | Weighted mode             | 21 | 0.1528  | 0.1658 | 0.3680 | -0.0083 | 0.0336 | 0.8074 | 29.0499 | 0.0652 | 54.9329  |
| SmallVesselStroke | MF0047 | MR Egger                  | 21 | -0.0022 | 0.0703 | 0.9752 | -0.0003 | 0.0083 | 0.9748 | 16.1776 | 0.6454 | 476.1825 |
| SmallVesselStroke | MF0047 | Weighted median           | 21 | 0.0069  | 0.0250 | 0.7818 | -0.0003 | 0.0083 | 0.9748 | 16.1776 | 0.6454 | 476.1825 |
| SmallVesselStroke | MF0047 | Inverse variance weighted | 21 | -0.0044 | 0.0181 | 0.8089 | -0.0003 | 0.0083 | 0.9748 | 16.1776 | 0.6454 | 476.1825 |
| SmallVesselStroke | MF0047 | Simple mode               | 21 | 0.0209  | 0.0444 | 0.6436 | -0.0003 | 0.0083 | 0.9748 | 16.1776 | 0.6454 | 476.1825 |
| SmallVesselStroke | MF0047 | Weighted mode             | 21 | 0.0151  | 0.0438 | 0.7340 | -0.0003 | 0.0083 | 0.9748 | 16.1776 | 0.6454 | 476.1825 |
| SmallVesselStroke | MF0048 | MR Egger                  | 21 | -0.0228 | 0.0603 | 0.7100 | 0.0029  | 0.0072 | 0.6893 | 32.2644 | 0.0292 | 640.3287 |
| SmallVesselStroke | MF0048 | Weighted median           | 21 | 0.0121  | 0.0173 | 0.4861 | 0.0029  | 0.0072 | 0.6893 | 32.2644 | 0.0292 | 640.3287 |
| SmallVesselStroke | MF0048 | Inverse variance weighted | 21 | 0.0009  | 0.0152 | 0.9536 | 0.0029  | 0.0072 | 0.6893 | 32.2644 | 0.0292 | 640.3287 |
| SmallVesselStroke | MF0048 | Simple mode               | 21 | 0.0018  | 0.0316 | 0.9558 | 0.0029  | 0.0072 | 0.6893 | 32.2644 | 0.0292 | 640.3287 |
| SmallVesselStroke | MF0048 | Weighted mode             | 21 | 0.0072  | 0.0279 | 0.7988 | 0.0029  | 0.0072 | 0.6893 | 32.2644 | 0.0292 | 640.3287 |
| SmallVesselStroke | MF0049 | MR Egger                  | 21 | -0.0117 | 0.0638 | 0.8560 | 0.0009  | 0.0076 | 0.9094 | 31.1658 | 0.0387 | 784.2569 |
| SmallVesselStroke | MF0049 | Weighted median           | 21 | -0.0054 | 0.0194 | 0.7802 | 0.0009  | 0.0076 | 0.9094 | 31.1658 | 0.0387 | 784.2569 |
| SmallVesselStroke | MF0049 | Inverse variance weighted | 21 | -0.0046 | 0.0161 | 0.7729 | 0.0009  | 0.0076 | 0.9094 | 31.1658 | 0.0387 | 784.2569 |
| SmallVesselStroke | MF0049 | Simple mode               | 21 | 0.0037  | 0.0396 | 0.9263 | 0.0009  | 0.0076 | 0.9094 | 31.1658 | 0.0387 | 784.2569 |
| SmallVesselStroke | MF0049 | Weighted mode             | 21 | 0.0103  | 0.0357 | 0.7754 | 0.0009  | 0.0076 | 0.9094 | 31.1658 | 0.0387 | 784.2569 |
| SmallVesselStroke | MF0050 | MR Egger                  | 21 | -0.0788 | 0.0704 | 0.2768 | 0.0080  | 0.0084 | 0.3528 | 23.0753 | 0.2340 | 332.5358 |
| SmallVesselStroke | MF0050 | Weighted median           | 21 | -0.0282 | 0.0244 | 0.2466 | 0.0080  | 0.0084 | 0.3528 | 23.0753 | 0.2340 | 332.5358 |
| SmallVesselStroke | MF0050 | Inverse variance weighted | 21 | -0.0140 | 0.0181 | 0.4387 | 0.0080  | 0.0084 | 0.3528 | 23.0753 | 0.2340 | 332.5358 |
| SmallVesselStroke | MF0050 | Simple mode               | 21 | -0.0387 | 0.0503 | 0.4509 | 0.0080  | 0.0084 | 0.3528 | 23.0753 | 0.2340 | 332.5358 |
| SmallVesselStroke | MF0050 | Weighted mode             | 21 | -0.0420 | 0.0444 | 0.3556 | 0.0080  | 0.0084 | 0.3528 | 23.0753 | 0.2340 | 332.5358 |
| SmallVesselStroke | MF0051 | MR Egger                  | 21 | 0.0165  | 0.0610 | 0.7898 | -0.0050 | 0.0072 | 0.5013 | 18.1589 | 0.5119 | 749.0560 |
| SmallVesselStroke | MF0051 | Weighted median           | 21 | -0.0186 | 0.0213 | 0.3827 | -0.0050 | 0.0072 | 0.5013 | 18.1589 | 0.5119 | 749.0560 |
| SmallVesselStroke | MF0051 | Inverse variance weighted | 21 | -0.0239 | 0.0157 | 0.1288 | -0.0050 | 0.0072 | 0.5013 | 18.1589 | 0.5119 | 749.0560 |
| SmallVesselStroke | MF0051 | Simple mode               | 21 | 0.0086  | 0.0416 | 0.8385 | -0.0050 | 0.0072 | 0.5013 | 18.1589 | 0.5119 | 749.0560 |
| SmallVesselStroke | MF0051 | Weighted mode             | 21 | -0.0011 | 0.0357 | 0.9747 | -0.0050 | 0.0072 | 0.5013 | 18.1589 | 0.5119 | 749.0560 |
| SmallVesselStroke | MF0052 | MR Egger                  | 21 | 0.1543  | 0.5879 | 0.7958 | -0.0200 | 0.0699 | 0.7775 | 22.2415 | 0.2724 | 8.3476   |
| SmallVesselStroke | MF0052 | Weighted median           | 21 | -0.0007 | 0.2000 | 0.9972 | -0.0200 | 0.0699 | 0.7775 | 22.2415 | 0.2724 | 8.3476   |
| SmallVesselStroke | MF0052 | Inverse variance weighted | 21 | -0.0085 | 0.1482 | 0.9541 | -0.0200 | 0.0699 | 0.7775 | 22.2415 | 0.2724 | 8.3476   |
| SmallVesselStroke | MF0052 | Simple mode               | 21 | -0.1596 | 0.3964 | 0.6914 | -0.0200 | 0.0699 | 0.7775 | 22.2415 | 0.2724 | 8.3476   |
| SmallVesselStroke | MF0052 | Weighted mode             | 21 | -0.0444 | 0.3420 | 0.8981 | -0.0200 | 0.0699 | 0.7775 | 22.2415 | 0.2724 | 8.3476   |
| SmallVesselStroke | MF0054 | MR Egger                  | 21 | 0.0872  | 0.0620 | 0.1760 | -0.0105 | 0.0074 | 0.1687 | 21.2576 | 0.3821 | 533.8799 |
| SmallVesselStroke | MF0054 | Weighted median           | 21 | -0.0140 | 0.0228 | 0.5392 | -0.0105 | 0.0074 | 0.1687 | 21.2576 | 0.3821 | 533.8799 |
| SmallVesselStroke | MF0054 | Inverse variance weighted | 21 | 0.0014  | 0.0164 | 0.9307 | -0.0105 | 0.0074 | 0.1687 | 21.2576 | 0.3821 | 533.8799 |
| SmallVesselStroke | MF0054 | Simple mode               | 21 | -0.0195 | 0.0391 | 0.6234 | -0.0105 | 0.0074 | 0.1687 | 21.2576 | 0.3821 | 533.8799 |
| SmallVesselStroke | MF0054 | Weighted mode             | 21 | -0.0172 | 0.0382 | 0.6565 | -0.0105 | 0.0074 | 0.1687 | 21.2576 | 0.3821 | 533.8799 |
| SmallVesselStroke | MF0055 | MR Egger                  | 21 | -0.2641 | 0.1960 | 0.1937 | 0.0338  | 0.0233 | 0.1627 | 31.0674 | 0.0543 | 144.2005 |
| SmallVesselStroke | MF0055 | Weighted median           | 21 | -0.0346 | 0.0635 | 0.5861 | 0.0338  | 0.0233 | 0.1627 | 31.0674 | 0.0543 | 144.2005 |
| SmallVesselStroke | MF0055 | Inverse variance weighted | 21 | 0.0110  | 0.0520 | 0.8331 | 0.0338  | 0.0233 | 0.1627 | 31.0674 | 0.0543 | 144.2005 |
| SmallVesselStroke | MF0055 | Simple mode               | 21 | -0.0911 | 0.1172 | 0.4461 | 0.0338  | 0.0233 | 0.1627 | 31.0674 | 0.0543 | 144.2005 |

|                   |        |                           |    |         |        |        |         |        |        |         |        |           |
|-------------------|--------|---------------------------|----|---------|--------|--------|---------|--------|--------|---------|--------|-----------|
| SmallVesselStroke | MF0055 | Weighted mode             | 21 | -0.0558 | 0.1014 | 0.5882 | 0.0338  | 0.0233 | 0.1627 | 31.0674 | 0.0543 | 144.2005  |
| SmallVesselStroke | MF0056 | MR Egger                  | 21 | 0.2006  | 0.2259 | 0.3855 | -0.0222 | 0.0268 | 0.4189 | 23.4112 | 0.2197 | 116.9692  |
| SmallVesselStroke | MF0056 | Weighted median           | 21 | -0.0051 | 0.0724 | 0.9439 | -0.0222 | 0.0268 | 0.4189 | 23.4112 | 0.2197 | 116.9692  |
| SmallVesselStroke | MF0056 | Inverse variance weighted | 21 | 0.0203  | 0.0578 | 0.7254 | -0.0222 | 0.0268 | 0.4189 | 23.4112 | 0.2197 | 116.9692  |
| SmallVesselStroke | MF0056 | Simple mode               | 21 | -0.0411 | 0.1269 | 0.7492 | -0.0222 | 0.0268 | 0.4189 | 23.4112 | 0.2197 | 116.9692  |
| SmallVesselStroke | MF0056 | Weighted mode             | 21 | 0.0040  | 0.1224 | 0.9743 | -0.0222 | 0.0268 | 0.4189 | 23.4112 | 0.2197 | 116.9692  |
| SmallVesselStroke | MF0057 | MR Egger                  | 21 | -0.0298 | 0.3034 | 0.9229 | 0.0158  | 0.0360 | 0.6665 | 23.3218 | 0.2235 | 69.4097   |
| SmallVesselStroke | MF0057 | Weighted median           | 21 | 0.1398  | 0.1000 | 0.1619 | 0.0158  | 0.0360 | 0.6665 | 23.3218 | 0.2235 | 69.4097   |
| SmallVesselStroke | MF0057 | Inverse variance weighted | 21 | 0.0986  | 0.0767 | 0.1987 | 0.0158  | 0.0360 | 0.6665 | 23.3218 | 0.2235 | 69.4097   |
| SmallVesselStroke | MF0057 | Simple mode               | 21 | 0.0868  | 0.1807 | 0.6363 | 0.0158  | 0.0360 | 0.6665 | 23.3218 | 0.2235 | 69.4097   |
| SmallVesselStroke | MF0057 | Weighted mode             | 21 | 0.0920  | 0.1648 | 0.5827 | 0.0158  | 0.0360 | 0.6665 | 23.3218 | 0.2235 | 69.4097   |
| SmallVesselStroke | MF0058 | MR Egger                  | 21 | -0.1498 | 0.2071 | 0.4783 | 0.0209  | 0.0246 | 0.4073 | 29.9845 | 0.0520 | 130.5028  |
| SmallVesselStroke | MF0058 | Weighted median           | 21 | 0.0270  | 0.0642 | 0.6736 | 0.0209  | 0.0246 | 0.4073 | 29.9845 | 0.0520 | 130.5028  |
| SmallVesselStroke | MF0058 | Inverse variance weighted | 21 | 0.0198  | 0.0531 | 0.7095 | 0.0209  | 0.0246 | 0.4073 | 29.9845 | 0.0520 | 130.5028  |
| SmallVesselStroke | MF0058 | Simple mode               | 21 | -0.1093 | 0.1251 | 0.3928 | 0.0209  | 0.0246 | 0.4073 | 29.9845 | 0.0520 | 130.5028  |
| SmallVesselStroke | MF0058 | Weighted mode             | 21 | -0.1061 | 0.1251 | 0.4062 | 0.0209  | 0.0246 | 0.4073 | 29.9845 | 0.0520 | 130.5028  |
| SmallVesselStroke | MF0059 | MR Egger                  | 21 | -0.1466 | 0.3872 | 0.7091 | 0.0284  | 0.0460 | 0.5444 | 21.4822 | 0.3108 | 46.5771   |
| SmallVesselStroke | MF0059 | Weighted median           | 21 | 0.1737  | 0.1373 | 0.2059 | 0.0284  | 0.0460 | 0.5444 | 21.4822 | 0.3108 | 46.5771   |
| SmallVesselStroke | MF0059 | Inverse variance weighted | 21 | 0.0843  | 0.0983 | 0.3915 | 0.0284  | 0.0460 | 0.5444 | 21.4822 | 0.3108 | 46.5771   |
| SmallVesselStroke | MF0059 | Simple mode               | 21 | 0.2159  | 0.2575 | 0.4118 | 0.0284  | 0.0460 | 0.5444 | 21.4822 | 0.3108 | 46.5771   |
| SmallVesselStroke | MF0059 | Weighted mode             | 21 | 0.1822  | 0.2330 | 0.4434 | 0.0284  | 0.0460 | 0.5444 | 21.4822 | 0.3108 | 46.5771   |
| SmallVesselStroke | MF0060 | MR Egger                  | 21 | 0.0133  | 0.1704 | 0.9386 | 0.0008  | 0.0202 | 0.9671 | 15.5406 | 0.6877 | 230.7379  |
| SmallVesselStroke | MF0060 | Weighted median           | 21 | -0.0114 | 0.0635 | 0.8572 | 0.0008  | 0.0202 | 0.9671 | 15.5406 | 0.6877 | 230.7379  |
| SmallVesselStroke | MF0060 | Inverse variance weighted | 21 | 0.0202  | 0.0440 | 0.6462 | 0.0008  | 0.0202 | 0.9671 | 15.5406 | 0.6877 | 230.7379  |
| SmallVesselStroke | MF0060 | Simple mode               | 21 | -0.0045 | 0.1279 | 0.9724 | 0.0008  | 0.0202 | 0.9671 | 15.5406 | 0.6877 | 230.7379  |
| SmallVesselStroke | MF0060 | Weighted mode             | 21 | 0.0063  | 0.1217 | 0.9591 | 0.0008  | 0.0202 | 0.9671 | 15.5406 | 0.6877 | 230.7379  |
| SmallVesselStroke | MF0061 | MR Egger                  | 21 | 0.0305  | 0.1653 | 0.8556 | -0.0021 | 0.0196 | 0.9148 | 29.8218 | 0.0541 | 178.1840  |
| SmallVesselStroke | MF0061 | Weighted median           | 21 | 0.0127  | 0.0510 | 0.8033 | -0.0021 | 0.0196 | 0.9148 | 29.8218 | 0.0541 | 178.1840  |
| SmallVesselStroke | MF0061 | Inverse variance weighted | 21 | 0.0132  | 0.0416 | 0.7511 | -0.0021 | 0.0196 | 0.9148 | 29.8218 | 0.0541 | 178.1840  |
| SmallVesselStroke | MF0061 | Simple mode               | 21 | -0.1151 | 0.1038 | 0.2809 | -0.0021 | 0.0196 | 0.9148 | 29.8218 | 0.0541 | 178.1840  |
| SmallVesselStroke | MF0061 | Weighted mode             | 21 | -0.0602 | 0.0991 | 0.5508 | -0.0021 | 0.0196 | 0.9148 | 29.8218 | 0.0541 | 178.1840  |
| SmallVesselStroke | MF0062 | MR Egger                  | 21 | 0.2871  | 0.2533 | 0.2711 | -0.0207 | 0.0301 | 0.4996 | 15.5362 | 0.6880 | 98.3038   |
| SmallVesselStroke | MF0062 | Weighted median           | 21 | 0.1261  | 0.0960 | 0.1891 | -0.0207 | 0.0301 | 0.4996 | 15.5362 | 0.6880 | 98.3038   |
| SmallVesselStroke | MF0062 | Inverse variance weighted | 21 | 0.1187  | 0.0654 | 0.0693 | -0.0207 | 0.0301 | 0.4996 | 15.5362 | 0.6880 | 98.3038   |
| SmallVesselStroke | MF0062 | Simple mode               | 21 | 0.3538  | 0.1830 | 0.0674 | -0.0207 | 0.0301 | 0.4996 | 15.5362 | 0.6880 | 98.3038   |
| SmallVesselStroke | MF0062 | Weighted mode             | 21 | 0.3634  | 0.1810 | 0.0583 | -0.0207 | 0.0301 | 0.4996 | 15.5362 | 0.6880 | 98.3038   |
| SmallVesselStroke | MF0063 | MR Egger                  | 21 | -0.0186 | 0.0579 | 0.7523 | 0.0013  | 0.0069 | 0.8535 | 22.6735 | 0.2520 | 763.3484  |
| SmallVesselStroke | MF0063 | Weighted median           | 21 | 0.0056  | 0.0205 | 0.7836 | 0.0013  | 0.0069 | 0.8535 | 22.6735 | 0.2520 | 763.3484  |
| SmallVesselStroke | MF0063 | Inverse variance weighted | 21 | -0.0081 | 0.0146 | 0.5800 | 0.0013  | 0.0069 | 0.8535 | 22.6735 | 0.2520 | 763.3484  |
| SmallVesselStroke | MF0063 | Simple mode               | 21 | 0.0187  | 0.0387 | 0.6335 | 0.0013  | 0.0069 | 0.8535 | 22.6735 | 0.2520 | 763.3484  |
| SmallVesselStroke | MF0063 | Weighted mode             | 21 | 0.0170  | 0.0375 | 0.6552 | 0.0013  | 0.0069 | 0.8535 | 22.6735 | 0.2520 | 763.3484  |
| SmallVesselStroke | MF0064 | MR Egger                  | 21 | 0.1038  | 0.2557 | 0.6894 | -0.0010 | 0.0304 | 0.9750 | 21.1859 | 0.3266 | 74.3537   |
| SmallVesselStroke | MF0064 | Weighted median           | 21 | 0.0030  | 0.0869 | 0.9721 | -0.0010 | 0.0304 | 0.9750 | 21.1859 | 0.3266 | 74.3537   |
| SmallVesselStroke | MF0064 | Inverse variance weighted | 21 | 0.0959  | 0.0643 | 0.1359 | -0.0010 | 0.0304 | 0.9750 | 21.1859 | 0.3266 | 74.3537   |
| SmallVesselStroke | MF0064 | Simple mode               | 21 | -0.0271 | 0.1692 | 0.8744 | -0.0010 | 0.0304 | 0.9750 | 21.1859 | 0.3266 | 74.3537   |
| SmallVesselStroke | MF0064 | Weighted mode             | 21 | -0.0146 | 0.1564 | 0.9264 | -0.0010 | 0.0304 | 0.9750 | 21.1859 | 0.3266 | 74.3537   |
| SmallVesselStroke | MF0065 | MR Egger                  | 21 | -0.0064 | 0.0480 | 0.8960 | 0.0020  | 0.0057 | 0.7241 | 21.2754 | 0.3218 | 1044.5265 |
| SmallVesselStroke | MF0065 | Weighted median           | 21 | 0.0135  | 0.0170 | 0.4284 | 0.0020  | 0.0057 | 0.7241 | 21.2754 | 0.3218 | 1044.5265 |
| SmallVesselStroke | MF0065 | Inverse variance weighted | 21 | 0.0103  | 0.0121 | 0.3972 | 0.0020  | 0.0057 | 0.7241 | 21.2754 | 0.3218 | 1044.5265 |
| SmallVesselStroke | MF0065 | Simple mode               | 21 | 0.0158  | 0.0297 | 0.6017 | 0.0020  | 0.0057 | 0.7241 | 21.2754 | 0.3218 | 1044.5265 |
| SmallVesselStroke | MF0065 | Weighted mode             | 21 | 0.0218  | 0.0290 | 0.4608 | 0.0020  | 0.0057 | 0.7241 | 21.2754 | 0.3218 | 1044.5265 |
| SmallVesselStroke | MF0066 | MR Egger                  | 21 | 0.1075  | 0.2147 | 0.6224 | -0.0110 | 0.0255 | 0.6715 | 36.2405 | 0.0099 | 91.3556   |
| SmallVesselStroke | MF0066 | Weighted median           | 21 | 0.0273  | 0.0634 | 0.6667 | -0.0110 | 0.0255 | 0.6715 | 36.2405 | 0.0099 | 91.3556   |
| SmallVesselStroke | MF0066 | Inverse variance weighted | 21 | 0.0181  | 0.0543 | 0.7382 | -0.0110 | 0.0255 | 0.6715 | 36.2405 | 0.0099 | 91.3556   |
| SmallVesselStroke | MF0066 | Simple mode               | 21 | 0.0806  | 0.1369 | 0.5625 | -0.0110 | 0.0255 | 0.6715 | 36.2405 | 0.0099 | 91.3556   |
| SmallVesselStroke | MF0066 | Weighted mode             | 21 | 0.1030  | 0.1141 | 0.3775 | -0.0110 | 0.0255 | 0.6715 | 36.2405 | 0.0099 | 91.3556   |
| SmallVesselStroke | MF0067 | MR Egger                  | 21 | -0.0472 | 0.0421 | 0.2753 | 0.0059  | 0.0050 | 0.2492 | 17.3972 | 0.6271 | 1614.5673 |
| SmallVesselStroke | MF0067 | Weighted median           | 21 | -0.0009 | 0.0152 | 0.9506 | 0.0059  | 0.0050 | 0.2492 | 17.3972 | 0.6271 | 1614.5673 |
| SmallVesselStroke | MF0067 | Inverse variance weighted | 21 | 0.0011  | 0.0109 | 0.9220 | 0.0059  | 0.0050 | 0.2492 | 17.3972 | 0.6271 | 1614.5673 |
| SmallVesselStroke | MF0067 | Simple mode               | 21 | -0.0002 | 0.0263 | 0.9939 | 0.0059  | 0.0050 | 0.2492 | 17.3972 | 0.6271 | 1614.5673 |
| SmallVesselStroke | MF0067 | Weighted mode             | 21 | -0.0042 | 0.0272 | 0.8781 | 0.0059  | 0.0050 | 0.2492 | 17.3972 | 0.6271 | 1614.5673 |

|                   |        |                           |    |         |        |        |         |        |        |         |        |           |
|-------------------|--------|---------------------------|----|---------|--------|--------|---------|--------|--------|---------|--------|-----------|
| SmallVesselStroke | MF0068 | MR Egger                  | 21 | -0.0354 | 0.0504 | 0.4908 | 0.0041  | 0.0060 | 0.4985 | 32.7468 | 0.0257 | 871.0698  |
| SmallVesselStroke | MF0068 | Weighted median           | 21 | -0.0134 | 0.0148 | 0.3676 | 0.0041  | 0.0060 | 0.4985 | 32.7468 | 0.0257 | 871.0698  |
| SmallVesselStroke | MF0068 | Inverse variance weighted | 21 | -0.0018 | 0.0128 | 0.8878 | 0.0041  | 0.0060 | 0.4985 | 32.7468 | 0.0257 | 871.0698  |
| SmallVesselStroke | MF0068 | Simple mode               | 21 | -0.0216 | 0.0267 | 0.4291 | 0.0041  | 0.0060 | 0.4985 | 32.7468 | 0.0257 | 871.0698  |
| SmallVesselStroke | MF0068 | Weighted mode             | 21 | -0.0186 | 0.0245 | 0.4577 | 0.0041  | 0.0060 | 0.4985 | 32.7468 | 0.0257 | 871.0698  |
| SmallVesselStroke | MF0069 | MR Egger                  | 21 | -0.0388 | 0.2098 | 0.8553 | 0.0060  | 0.0249 | 0.8131 | 16.6410 | 0.6142 | 156.2678  |
| SmallVesselStroke | MF0069 | Weighted median           | 21 | 0.0501  | 0.0748 | 0.5029 | 0.0060  | 0.0249 | 0.8131 | 16.6410 | 0.6142 | 156.2678  |
| SmallVesselStroke | MF0069 | Inverse variance weighted | 21 | 0.0098  | 0.0541 | 0.8564 | 0.0060  | 0.0249 | 0.8131 | 16.6410 | 0.6142 | 156.2678  |
| SmallVesselStroke | MF0069 | Simple mode               | 21 | 0.0928  | 0.1383 | 0.5098 | 0.0060  | 0.0249 | 0.8131 | 16.6410 | 0.6142 | 156.2678  |
| SmallVesselStroke | MF0069 | Weighted mode             | 21 | 0.1159  | 0.1268 | 0.3717 | 0.0060  | 0.0249 | 0.8131 | 16.6410 | 0.6142 | 156.2678  |
| SmallVesselStroke | MF0070 | MR Egger                  | 21 | 0.1804  | 0.3105 | 0.5681 | -0.0164 | 0.0369 | 0.6611 | 29.0002 | 0.0660 | 51.9428   |
| SmallVesselStroke | MF0070 | Weighted median           | 21 | 0.0286  | 0.0952 | 0.7638 | -0.0164 | 0.0369 | 0.6611 | 29.0002 | 0.0660 | 51.9428   |
| SmallVesselStroke | MF0070 | Inverse variance weighted | 21 | 0.0468  | 0.0785 | 0.5513 | -0.0164 | 0.0369 | 0.6611 | 29.0002 | 0.0660 | 51.9428   |
| SmallVesselStroke | MF0070 | Simple mode               | 21 | 0.1617  | 0.1799 | 0.3794 | -0.0164 | 0.0369 | 0.6611 | 29.0002 | 0.0660 | 51.9428   |
| SmallVesselStroke | MF0070 | Weighted mode             | 21 | 0.1670  | 0.1636 | 0.3198 | -0.0164 | 0.0369 | 0.6611 | 29.0002 | 0.0660 | 51.9428   |
| SmallVesselStroke | MF0071 | MR Egger                  | 21 | -0.0394 | 0.0402 | 0.3388 | 0.0048  | 0.0048 | 0.3292 | 31.5709 | 0.0481 | 1461.8730 |
| SmallVesselStroke | MF0071 | Weighted median           | 21 | -0.0016 | 0.0126 | 0.8963 | 0.0048  | 0.0048 | 0.3292 | 31.5709 | 0.0481 | 1461.8730 |
| SmallVesselStroke | MF0071 | Inverse variance weighted | 21 | -0.0006 | 0.0104 | 0.9571 | 0.0048  | 0.0048 | 0.3292 | 31.5709 | 0.0481 | 1461.8730 |
| SmallVesselStroke | MF0071 | Simple mode               | 21 | 0.0010  | 0.0243 | 0.9678 | 0.0048  | 0.0048 | 0.3292 | 31.5709 | 0.0481 | 1461.8730 |
| SmallVesselStroke | MF0071 | Weighted mode             | 21 | -0.0007 | 0.0247 | 0.9791 | 0.0048  | 0.0048 | 0.3292 | 31.5709 | 0.0481 | 1461.8730 |
| SmallVesselStroke | MF0072 | MR Egger                  | 21 | -0.0844 | 0.2650 | 0.7535 | 0.0022  | 0.0315 | 0.9456 | 22.8829 | 0.2425 | 101.5741  |
| SmallVesselStroke | MF0072 | Weighted median           | 21 | -0.0436 | 0.0928 | 0.6384 | 0.0022  | 0.0315 | 0.9456 | 22.8829 | 0.2425 | 101.5741  |
| SmallVesselStroke | MF0072 | Inverse variance weighted | 21 | -0.0667 | 0.0667 | 0.3168 | 0.0022  | 0.0315 | 0.9456 | 22.8829 | 0.2425 | 101.5741  |
| SmallVesselStroke | MF0072 | Simple mode               | 21 | -0.0120 | 0.1708 | 0.9447 | 0.0022  | 0.0315 | 0.9456 | 22.8829 | 0.2425 | 101.5741  |
| SmallVesselStroke | MF0072 | Weighted mode             | 21 | -0.0563 | 0.1623 | 0.7324 | 0.0022  | 0.0315 | 0.9456 | 22.8829 | 0.2425 | 101.5741  |
| SmallVesselStroke | MF0073 | MR Egger                  | 21 | -0.0052 | 0.0575 | 0.9294 | -0.0001 | 0.0068 | 0.9833 | 25.8909 | 0.1333 | 714.6994  |
| SmallVesselStroke | MF0073 | Weighted median           | 21 | -0.0084 | 0.0185 | 0.6477 | -0.0001 | 0.0068 | 0.9833 | 25.8909 | 0.1333 | 714.6994  |
| SmallVesselStroke | MF0073 | Inverse variance weighted | 21 | -0.0063 | 0.0145 | 0.6611 | -0.0001 | 0.0068 | 0.9833 | 25.8909 | 0.1333 | 714.6994  |
| SmallVesselStroke | MF0073 | Simple mode               | 21 | -0.0201 | 0.0384 | 0.6063 | -0.0001 | 0.0068 | 0.9833 | 25.8909 | 0.1333 | 714.6994  |
| SmallVesselStroke | MF0073 | Weighted mode             | 21 | -0.0361 | 0.0373 | 0.3453 | -0.0001 | 0.0068 | 0.9833 | 25.8909 | 0.1333 | 714.6994  |
| SmallVesselStroke | MF0074 | MR Egger                  | 21 | -0.0056 | 0.0615 | 0.9288 | 0.0002  | 0.0073 | 0.9800 | 28.3260 | 0.0774 | 738.0988  |
| SmallVesselStroke | MF0074 | Weighted median           | 21 | 0.0075  | 0.0188 | 0.6904 | 0.0002  | 0.0073 | 0.9800 | 28.3260 | 0.0774 | 738.0988  |
| SmallVesselStroke | MF0074 | Inverse variance weighted | 21 | -0.0041 | 0.0155 | 0.7929 | 0.0002  | 0.0073 | 0.9800 | 28.3260 | 0.0774 | 738.0988  |
| SmallVesselStroke | MF0074 | Simple mode               | 21 | 0.0164  | 0.0403 | 0.6886 | 0.0002  | 0.0073 | 0.9800 | 28.3260 | 0.0774 | 738.0988  |
| SmallVesselStroke | MF0074 | Weighted mode             | 21 | 0.0268  | 0.0369 | 0.4766 | 0.0002  | 0.0073 | 0.9800 | 28.3260 | 0.0774 | 738.0988  |
| SmallVesselStroke | MF0075 | MR Egger                  | 21 | 0.0717  | 0.0977 | 0.4716 | -0.0098 | 0.0116 | 0.4097 | 31.4609 | 0.0359 | 392.7026  |
| SmallVesselStroke | MF0075 | Weighted median           | 21 | -0.0171 | 0.0288 | 0.5520 | -0.0098 | 0.0116 | 0.4097 | 31.4609 | 0.0359 | 392.7026  |
| SmallVesselStroke | MF0075 | Inverse variance weighted | 21 | -0.0078 | 0.0250 | 0.7549 | -0.0098 | 0.0116 | 0.4097 | 31.4609 | 0.0359 | 392.7026  |
| SmallVesselStroke | MF0075 | Simple mode               | 21 | -0.0241 | 0.0546 | 0.6635 | -0.0098 | 0.0116 | 0.4097 | 31.4609 | 0.0359 | 392.7026  |
| SmallVesselStroke | MF0075 | Weighted mode             | 21 | -0.0163 | 0.0476 | 0.7361 | -0.0098 | 0.0116 | 0.4097 | 31.4609 | 0.0359 | 392.7026  |
| SmallVesselStroke | MF0076 | MR Egger                  | 21 | -0.0294 | 0.2153 | 0.8930 | 0.0088  | 0.0256 | 0.7335 | 15.2694 | 0.7053 | 184.0816  |
| SmallVesselStroke | MF0076 | Weighted median           | 21 | 0.0226  | 0.0770 | 0.7689 | 0.0088  | 0.0256 | 0.7335 | 15.2694 | 0.7053 | 184.0816  |
| SmallVesselStroke | MF0076 | Inverse variance weighted | 21 | 0.0425  | 0.0555 | 0.4443 | 0.0088  | 0.0256 | 0.7335 | 15.2694 | 0.7053 | 184.0816  |
| SmallVesselStroke | MF0076 | Simple mode               | 21 | -0.0484 | 0.1607 | 0.7663 | 0.0088  | 0.0256 | 0.7335 | 15.2694 | 0.7053 | 184.0816  |
| SmallVesselStroke | MF0076 | Weighted mode             | 21 | -0.0393 | 0.1482 | 0.7938 | 0.0088  | 0.0256 | 0.7335 | 15.2694 | 0.7053 | 184.0816  |
| SmallVesselStroke | MF0077 | MR Egger                  | 21 | -0.0948 | 0.1603 | 0.5610 | 0.0145  | 0.0190 | 0.4554 | 21.4108 | 0.3146 | 232.2487  |
| SmallVesselStroke | MF0077 | Weighted median           | 21 | -0.0092 | 0.0569 | 0.8718 | 0.0145  | 0.0190 | 0.4554 | 21.4108 | 0.3146 | 232.2487  |
| SmallVesselStroke | MF0077 | Inverse variance weighted | 21 | 0.0231  | 0.0409 | 0.5716 | 0.0145  | 0.0190 | 0.4554 | 21.4108 | 0.3146 | 232.2487  |
| SmallVesselStroke | MF0077 | Simple mode               | 21 | 0.0009  | 0.1132 | 0.9937 | 0.0145  | 0.0190 | 0.4554 | 21.4108 | 0.3146 | 232.2487  |
| SmallVesselStroke | MF0077 | Weighted mode             | 21 | -0.0165 | 0.0985 | 0.8687 | 0.0145  | 0.0190 | 0.4554 | 21.4108 | 0.3146 | 232.2487  |
| SmallVesselStroke | MF0078 | MR Egger                  | 21 | 0.1366  | 0.1748 | 0.4442 | -0.0123 | 0.0208 | 0.5600 | 36.9908 | 0.0080 | 98.7537   |
| SmallVesselStroke | MF0078 | Weighted median           | 21 | 0.0654  | 0.0518 | 0.2065 | -0.0123 | 0.0208 | 0.5600 | 36.9908 | 0.0080 | 98.7537   |
| SmallVesselStroke | MF0078 | Inverse variance weighted | 21 | 0.0364  | 0.0444 | 0.4124 | -0.0123 | 0.0208 | 0.5600 | 36.9908 | 0.0080 | 98.7537   |
| SmallVesselStroke | MF0078 | Simple mode               | 21 | -0.1139 | 0.1223 | 0.3629 | -0.0123 | 0.0208 | 0.5600 | 36.9908 | 0.0080 | 98.7537   |
| SmallVesselStroke | MF0078 | Weighted mode             | 21 | 0.1111  | 0.1136 | 0.3396 | -0.0123 | 0.0208 | 0.5600 | 36.9908 | 0.0080 | 98.7537   |
| SmallVesselStroke | MF0079 | MR Egger                  | 21 | 0.0875  | 0.2433 | 0.7231 | 0.0008  | 0.0289 | 0.9795 | 19.7165 | 0.4118 | 119.5533  |
| SmallVesselStroke | MF0079 | Weighted median           | 21 | 0.0930  | 0.0874 | 0.2874 | 0.0008  | 0.0289 | 0.9795 | 19.7165 | 0.4118 | 119.5533  |
| SmallVesselStroke | MF0079 | Inverse variance weighted | 21 | 0.0936  | 0.0616 | 0.1287 | 0.0008  | 0.0289 | 0.9795 | 19.7165 | 0.4118 | 119.5533  |
| SmallVesselStroke | MF0079 | Simple mode               | 21 | 0.1410  | 0.1801 | 0.4429 | 0.0008  | 0.0289 | 0.9795 | 19.7165 | 0.4118 | 119.5533  |
| SmallVesselStroke | MF0079 | Weighted mode             | 21 | 0.1591  | 0.1623 | 0.3389 | 0.0008  | 0.0289 | 0.9795 | 19.7165 | 0.4118 | 119.5533  |
| SmallVesselStroke | MF0080 | MR Egger                  | 21 | -0.2770 | 0.2056 | 0.1938 | 0.0292  | 0.0244 | 0.2475 | 26.6672 | 0.1449 | 118.2850  |

|                   |        |                           |    |         |        |        |         |        |        |         |        |           |
|-------------------|--------|---------------------------|----|---------|--------|--------|---------|--------|--------|---------|--------|-----------|
| SmallVesselStroke | MF0080 | Weighted median           | 21 | -0.0268 | 0.0698 | 0.7008 | 0.0292  | 0.0244 | 0.2475 | 26.6672 | 0.1449 | 118.2850  |
| SmallVesselStroke | MF0080 | Inverse variance weighted | 21 | -0.0399 | 0.0536 | 0.4567 | 0.0292  | 0.0244 | 0.2475 | 26.6672 | 0.1449 | 118.2850  |
| SmallVesselStroke | MF0080 | Simple mode               | 21 | 0.0179  | 0.1294 | 0.8914 | 0.0292  | 0.0244 | 0.2475 | 26.6672 | 0.1449 | 118.2850  |
| SmallVesselStroke | MF0080 | Weighted mode             | 21 | 0.0112  | 0.1123 | 0.9216 | 0.0292  | 0.0244 | 0.2475 | 26.6672 | 0.1449 | 118.2850  |
| SmallVesselStroke | MF0081 | MR Egger                  | 21 | -0.3847 | 0.3983 | 0.3462 | 0.0447  | 0.0473 | 0.3564 | 17.5933 | 0.5497 | 23.9358   |
| SmallVesselStroke | MF0081 | Weighted median           | 21 | -0.1044 | 0.1450 | 0.4713 | 0.0447  | 0.0473 | 0.3564 | 17.5933 | 0.5497 | 23.9358   |
| SmallVesselStroke | MF0081 | Inverse variance weighted | 21 | -0.0210 | 0.1028 | 0.8380 | 0.0447  | 0.0473 | 0.3564 | 17.5933 | 0.5497 | 23.9358   |
| SmallVesselStroke | MF0081 | Simple mode               | 21 | -0.1449 | 0.2792 | 0.6094 | 0.0447  | 0.0473 | 0.3564 | 17.5933 | 0.5497 | 23.9358   |
| SmallVesselStroke | MF0081 | Weighted mode             | 21 | -0.1566 | 0.2523 | 0.5419 | 0.0447  | 0.0473 | 0.3564 | 17.5933 | 0.5497 | 23.9358   |
| SmallVesselStroke | MF0082 | MR Egger                  | 21 | -0.1141 | 0.3399 | 0.7408 | 0.0040  | 0.0404 | 0.9214 | 23.3514 | 0.2222 | 55.5724   |
| SmallVesselStroke | MF0082 | Weighted median           | 21 | 0.0457  | 0.1182 | 0.6993 | 0.0040  | 0.0404 | 0.9214 | 23.3514 | 0.2222 | 55.5724   |
| SmallVesselStroke | MF0082 | Inverse variance weighted | 21 | -0.0813 | 0.0855 | 0.3421 | 0.0040  | 0.0404 | 0.9214 | 23.3514 | 0.2222 | 55.5724   |
| SmallVesselStroke | MF0082 | Simple mode               | 21 | 0.1966  | 0.2373 | 0.4171 | 0.0040  | 0.0404 | 0.9214 | 23.3514 | 0.2222 | 55.5724   |
| SmallVesselStroke | MF0082 | Weighted mode             | 21 | 0.1720  | 0.2275 | 0.4583 | 0.0040  | 0.0404 | 0.9214 | 23.3514 | 0.2222 | 55.5724   |
| SmallVesselStroke | MF0083 | MR Egger                  | 21 | 0.1150  | 0.3426 | 0.7408 | -0.0202 | 0.0407 | 0.6260 | 22.4615 | 0.2619 | 81.9563   |
| SmallVesselStroke | MF0083 | Weighted median           | 21 | 0.0534  | 0.1130 | 0.6364 | -0.0202 | 0.0407 | 0.6260 | 22.4615 | 0.2619 | 81.9563   |
| SmallVesselStroke | MF0083 | Inverse variance weighted | 21 | -0.0490 | 0.0867 | 0.5721 | -0.0202 | 0.0407 | 0.6260 | 22.4615 | 0.2619 | 81.9563   |
| SmallVesselStroke | MF0083 | Simple mode               | 21 | 0.1105  | 0.1961 | 0.5794 | -0.0202 | 0.0407 | 0.6260 | 22.4615 | 0.2619 | 81.9563   |
| SmallVesselStroke | MF0083 | Weighted mode             | 21 | 0.1105  | 0.1828 | 0.5523 | -0.0202 | 0.0407 | 0.6260 | 22.4615 | 0.2619 | 81.9563   |
| SmallVesselStroke | MF0084 | MR Egger                  | 21 | -0.4519 | 0.6003 | 0.4608 | 0.0532  | 0.0713 | 0.4652 | 18.6549 | 0.4792 | 11.6840   |
| SmallVesselStroke | MF0084 | Weighted median           | 21 | -0.0854 | 0.2239 | 0.7029 | 0.0532  | 0.0713 | 0.4652 | 18.6549 | 0.4792 | 11.6840   |
| SmallVesselStroke | MF0084 | Inverse variance weighted | 21 | -0.0196 | 0.1549 | 0.8991 | 0.0532  | 0.0713 | 0.4652 | 18.6549 | 0.4792 | 11.6840   |
| SmallVesselStroke | MF0084 | Simple mode               | 21 | -0.2979 | 0.4302 | 0.4967 | 0.0532  | 0.0713 | 0.4652 | 18.6549 | 0.4792 | 11.6840   |
| SmallVesselStroke | MF0084 | Weighted mode             | 21 | -0.1681 | 0.4255 | 0.6970 | 0.0532  | 0.0713 | 0.4652 | 18.6549 | 0.4792 | 11.6840   |
| SmallVesselStroke | MF0085 | MR Egger                  | 21 | -0.0833 | 0.2949 | 0.7806 | 0.0147  | 0.0350 | 0.6797 | 27.0635 | 0.1032 | 71.1505   |
| SmallVesselStroke | MF0085 | Weighted median           | 21 | 0.0126  | 0.0966 | 0.8961 | 0.0147  | 0.0350 | 0.6797 | 27.0635 | 0.1032 | 71.1505   |
| SmallVesselStroke | MF0085 | Inverse variance weighted | 21 | 0.0361  | 0.0745 | 0.6276 | 0.0147  | 0.0350 | 0.6797 | 27.0635 | 0.1032 | 71.1505   |
| SmallVesselStroke | MF0085 | Simple mode               | 21 | -0.0366 | 0.1929 | 0.8514 | 0.0147  | 0.0350 | 0.6797 | 27.0635 | 0.1032 | 71.1505   |
| SmallVesselStroke | MF0085 | Weighted mode             | 21 | -0.0094 | 0.1661 | 0.9555 | 0.0147  | 0.0350 | 0.6797 | 27.0635 | 0.1032 | 71.1505   |
| SmallVesselStroke | MF0086 | MR Egger                  | 21 | -0.0103 | 0.0383 | 0.7913 | -0.0001 | 0.0046 | 0.9867 | 17.3170 | 0.5684 | 1690.6395 |
| SmallVesselStroke | MF0086 | Weighted median           | 21 | -0.0168 | 0.0138 | 0.2243 | -0.0001 | 0.0046 | 0.9867 | 17.3170 | 0.5684 | 1690.6395 |
| SmallVesselStroke | MF0086 | Inverse variance weighted | 21 | -0.0109 | 0.0099 | 0.2699 | -0.0001 | 0.0046 | 0.9867 | 17.3170 | 0.5684 | 1690.6395 |
| SmallVesselStroke | MF0086 | Simple mode               | 21 | -0.0289 | 0.0244 | 0.2498 | -0.0001 | 0.0046 | 0.9867 | 17.3170 | 0.5684 | 1690.6395 |
| SmallVesselStroke | MF0086 | Weighted mode             | 21 | -0.0306 | 0.0243 | 0.2231 | -0.0001 | 0.0046 | 0.9867 | 17.3170 | 0.5684 | 1690.6395 |
| SmallVesselStroke | MF0087 | MR Egger                  | 21 | -0.1830 | 0.1626 | 0.2743 | 0.0251  | 0.0193 | 0.2089 | 25.3651 | 0.1878 | 221.1591  |
| SmallVesselStroke | MF0087 | Weighted median           | 21 | 0.0024  | 0.0564 | 0.9665 | 0.0251  | 0.0193 | 0.2089 | 25.3651 | 0.1878 | 221.1591  |
| SmallVesselStroke | MF0087 | Inverse variance weighted | 21 | 0.0213  | 0.0427 | 0.6178 | 0.0251  | 0.0193 | 0.2089 | 25.3651 | 0.1878 | 221.1591  |
| SmallVesselStroke | MF0087 | Simple mode               | 21 | -0.0312 | 0.1056 | 0.7708 | 0.0251  | 0.0193 | 0.2089 | 25.3651 | 0.1878 | 221.1591  |
| SmallVesselStroke | MF0087 | Weighted mode             | 21 | -0.0020 | 0.0927 | 0.9830 | 0.0251  | 0.0193 | 0.2089 | 25.3651 | 0.1878 | 221.1591  |
| SmallVesselStroke | MF0088 | MR Egger                  | 21 | 0.1390  | 0.1511 | 0.3692 | -0.0108 | 0.0180 | 0.5530 | 29.5693 | 0.0575 | 148.5751  |
| SmallVesselStroke | MF0088 | Weighted median           | 21 | 0.0729  | 0.0474 | 0.1235 | -0.0108 | 0.0180 | 0.5530 | 29.5693 | 0.0575 | 148.5751  |
| SmallVesselStroke | MF0088 | Inverse variance weighted | 21 | 0.0508  | 0.0384 | 0.1855 | -0.0108 | 0.0180 | 0.5530 | 29.5693 | 0.0575 | 148.5751  |
| SmallVesselStroke | MF0088 | Simple mode               | 21 | 0.0528  | 0.0935 | 0.5784 | -0.0108 | 0.0180 | 0.5530 | 29.5693 | 0.0575 | 148.5751  |
| SmallVesselStroke | MF0088 | Weighted mode             | 21 | 0.0874  | 0.0829 | 0.3043 | -0.0108 | 0.0180 | 0.5530 | 29.5693 | 0.0575 | 148.5751  |
| SmallVesselStroke | MF0089 | MR Egger                  | 21 | -0.0122 | 0.1659 | 0.9423 | 0.0063  | 0.0197 | 0.7529 | 16.8110 | 0.6027 | 228.0939  |
| SmallVesselStroke | MF0089 | Weighted median           | 21 | 0.0623  | 0.0612 | 0.3091 | 0.0063  | 0.0197 | 0.7529 | 16.8110 | 0.6027 | 228.0939  |
| SmallVesselStroke | MF0089 | Inverse variance weighted | 21 | 0.0390  | 0.0428 | 0.3618 | 0.0063  | 0.0197 | 0.7529 | 16.8110 | 0.6027 | 228.0939  |
| SmallVesselStroke | MF0089 | Simple mode               | 21 | 0.0826  | 0.1040 | 0.4360 | 0.0063  | 0.0197 | 0.7529 | 16.8110 | 0.6027 | 228.0939  |
| SmallVesselStroke | MF0089 | Weighted mode             | 21 | 0.0807  | 0.1012 | 0.4348 | 0.0063  | 0.0197 | 0.7529 | 16.8110 | 0.6027 | 228.0939  |
| SmallVesselStroke | MF0090 | MR Egger                  | 21 | -0.1191 | 0.1791 | 0.5140 | 0.0177  | 0.0213 | 0.4149 | 31.1478 | 0.0389 | 100.8004  |
| SmallVesselStroke | MF0090 | Weighted median           | 21 | 0.0457  | 0.0546 | 0.4018 | 0.0177  | 0.0213 | 0.4149 | 31.1478 | 0.0389 | 100.8004  |
| SmallVesselStroke | MF0090 | Inverse variance weighted | 21 | 0.0251  | 0.0459 | 0.5842 | 0.0177  | 0.0213 | 0.4149 | 31.1478 | 0.0389 | 100.8004  |
| SmallVesselStroke | MF0090 | Simple mode               | 21 | 0.1144  | 0.1129 | 0.3229 | 0.0177  | 0.0213 | 0.4149 | 31.1478 | 0.0389 | 100.8004  |
| SmallVesselStroke | MF0090 | Weighted mode             | 21 | 0.1144  | 0.1109 | 0.3145 | 0.0177  | 0.0213 | 0.4149 | 31.1478 | 0.0389 | 100.8004  |
| SmallVesselStroke | MF0091 | MR Egger                  | 21 | -0.1222 | 0.1792 | 0.5035 | 0.0181  | 0.0213 | 0.4065 | 31.0884 | 0.0395 | 100.4289  |
| SmallVesselStroke | MF0091 | Weighted median           | 21 | 0.0476  | 0.0530 | 0.3698 | 0.0181  | 0.0213 | 0.4065 | 31.0884 | 0.0395 | 100.4289  |
| SmallVesselStroke | MF0091 | Inverse variance weighted | 21 | 0.0248  | 0.0459 | 0.5895 | 0.0181  | 0.0213 | 0.4065 | 31.0884 | 0.0395 | 100.4289  |
| SmallVesselStroke | MF0091 | Simple mode               | 21 | 0.1146  | 0.1084 | 0.3031 | 0.0181  | 0.0213 | 0.4065 | 31.0884 | 0.0395 | 100.4289  |
| SmallVesselStroke | MF0091 | Weighted mode             | 21 | 0.1146  | 0.1008 | 0.2690 | 0.0181  | 0.0213 | 0.4065 | 31.0884 | 0.0395 | 100.4289  |
| SmallVesselStroke | MF0092 | MR Egger                  | 21 | 0.1403  | 0.1694 | 0.4179 | -0.0112 | 0.0201 | 0.5833 | 23.0232 | 0.2363 | 170.9912  |
| SmallVesselStroke | MF0092 | Weighted median           | 21 | 0.0233  | 0.0555 | 0.6747 | -0.0112 | 0.0201 | 0.5833 | 23.0232 | 0.2363 | 170.9912  |

|                   |                      |                           |    |         |        |        |         |        |        |         |        |          |
|-------------------|----------------------|---------------------------|----|---------|--------|--------|---------|--------|--------|---------|--------|----------|
| SmallVesselStroke | MF0092               | Inverse variance weighted | 21 | 0.0489  | 0.0429 | 0.2546 | -0.0112 | 0.0201 | 0.5833 | 23.0232 | 0.2363 | 170.9912 |
| SmallVesselStroke | MF0092               | Simple mode               | 21 | -0.0542 | 0.1094 | 0.6257 | -0.0112 | 0.0201 | 0.5833 | 23.0232 | 0.2363 | 170.9912 |
| SmallVesselStroke | MF0092               | Weighted mode             | 21 | -0.0371 | 0.1027 | 0.7217 | -0.0112 | 0.0201 | 0.5833 | 23.0232 | 0.2363 | 170.9912 |
| SmallVesselStroke | MF0093               | MR Egger                  | 21 | -0.0877 | 0.4923 | 0.8605 | 0.0128  | 0.0585 | 0.8285 | 19.8696 | 0.4025 | 22.1415  |
| SmallVesselStroke | MF0093               | Weighted median           | 21 | 0.0831  | 0.1777 | 0.6399 | 0.0128  | 0.0585 | 0.8285 | 19.8696 | 0.4025 | 22.1415  |
| SmallVesselStroke | MF0093               | Inverse variance weighted | 21 | 0.0167  | 0.1242 | 0.8928 | 0.0128  | 0.0585 | 0.8285 | 19.8696 | 0.4025 | 22.1415  |
| SmallVesselStroke | MF0093               | Simple mode               | 21 | 0.1542  | 0.3431 | 0.6580 | 0.0128  | 0.0585 | 0.8285 | 19.8696 | 0.4025 | 22.1415  |
| SmallVesselStroke | MF0093               | Weighted mode             | 21 | 0.1397  | 0.2958 | 0.6419 | 0.0128  | 0.0585 | 0.8285 | 19.8696 | 0.4025 | 22.1415  |
| SmallVesselStroke | MF0094               | MR Egger                  | 21 | -0.2468 | 0.2194 | 0.2748 | 0.0303  | 0.0261 | 0.2599 | 25.2638 | 0.1915 | 118.3346 |
| SmallVesselStroke | MF0094               | Weighted median           | 21 | 0.0089  | 0.0734 | 0.9036 | 0.0303  | 0.0261 | 0.2599 | 25.2638 | 0.1915 | 118.3346 |
| SmallVesselStroke | MF0094               | Inverse variance weighted | 21 | -0.0006 | 0.0571 | 0.9921 | 0.0303  | 0.0261 | 0.2599 | 25.2638 | 0.1915 | 118.3346 |
| SmallVesselStroke | MF0094               | Simple mode               | 21 | 0.0438  | 0.1342 | 0.7475 | 0.0303  | 0.0261 | 0.2599 | 25.2638 | 0.1915 | 118.3346 |
| SmallVesselStroke | MF0094               | Weighted mode             | 21 | 0.0475  | 0.1298 | 0.7182 | 0.0303  | 0.0261 | 0.2599 | 25.2638 | 0.1915 | 118.3346 |
| SmallVesselStroke | MF0095               | MR Egger                  | 21 | 0.1928  | 0.2903 | 0.5147 | -0.0180 | 0.0345 | 0.6077 | 30.6399 | 0.0442 | 48.3926  |
| SmallVesselStroke | MF0095               | Weighted median           | 21 | 0.1141  | 0.0867 | 0.1881 | -0.0180 | 0.0345 | 0.6077 | 30.6399 | 0.0442 | 48.3926  |
| SmallVesselStroke | MF0095               | Inverse variance weighted | 21 | 0.0464  | 0.0736 | 0.5283 | -0.0180 | 0.0345 | 0.6077 | 30.6399 | 0.0442 | 48.3926  |
| SmallVesselStroke | MF0095               | Simple mode               | 21 | 0.1459  | 0.1638 | 0.3837 | -0.0180 | 0.0345 | 0.6077 | 30.6399 | 0.0442 | 48.3926  |
| SmallVesselStroke | MF0095               | Weighted mode             | 21 | 0.1594  | 0.1396 | 0.2668 | -0.0180 | 0.0345 | 0.6077 | 30.6399 | 0.0442 | 48.3926  |
| SmallVesselStroke | MF0096               | MR Egger                  | 21 | -0.0188 | 0.0683 | 0.7863 | -0.0007 | 0.0081 | 0.9323 | 20.3041 | 0.3765 | 630.5921 |
| SmallVesselStroke | MF0096               | Weighted median           | 21 | -0.0135 | 0.0233 | 0.5619 | -0.0007 | 0.0081 | 0.9323 | 20.3041 | 0.3765 | 630.5921 |
| SmallVesselStroke | MF0096               | Inverse variance weighted | 21 | -0.0245 | 0.0172 | 0.1546 | -0.0007 | 0.0081 | 0.9323 | 20.3041 | 0.3765 | 630.5921 |
| SmallVesselStroke | MF0096               | Simple mode               | 21 | -0.0156 | 0.0419 | 0.7131 | -0.0007 | 0.0081 | 0.9323 | 20.3041 | 0.3765 | 630.5921 |
| SmallVesselStroke | MF0096               | Weighted mode             | 21 | -0.0156 | 0.0424 | 0.7169 | -0.0007 | 0.0081 | 0.9323 | 20.3041 | 0.3765 | 630.5921 |
| SmallVesselStroke | MF0097               | MR Egger                  | 21 | -0.1482 | 0.1892 | 0.4431 | 0.0182  | 0.0225 | 0.4271 | 19.2005 | 0.4440 | 124.4277 |
| SmallVesselStroke | MF0097               | Weighted median           | 21 | -0.0016 | 0.0747 | 0.9833 | 0.0182  | 0.0225 | 0.4271 | 19.2005 | 0.4440 | 124.4277 |
| SmallVesselStroke | MF0097               | Inverse variance weighted | 21 | 0.0001  | 0.0486 | 0.9977 | 0.0182  | 0.0225 | 0.4271 | 19.2005 | 0.4440 | 124.4277 |
| SmallVesselStroke | MF0097               | Simple mode               | 21 | -0.1961 | 0.1367 | 0.1669 | 0.0182  | 0.0225 | 0.4271 | 19.2005 | 0.4440 | 124.4277 |
| SmallVesselStroke | MF0097               | Weighted mode             | 21 | -0.1770 | 0.1322 | 0.1955 | 0.0182  | 0.0225 | 0.4271 | 19.2005 | 0.4440 | 124.4277 |
| SmallVesselStroke | MF0098               | MR Egger                  | 21 | 0.0166  | 0.0756 | 0.8281 | -0.0025 | 0.0090 | 0.7799 | 25.1240 | 0.1565 | 396.7685 |
| SmallVesselStroke | MF0098               | Weighted median           | 21 | 0.0142  | 0.0248 | 0.5681 | -0.0025 | 0.0090 | 0.7799 | 25.1240 | 0.1565 | 396.7685 |
| SmallVesselStroke | MF0098               | Inverse variance weighted | 21 | -0.0041 | 0.0191 | 0.8315 | -0.0025 | 0.0090 | 0.7799 | 25.1240 | 0.1565 | 396.7685 |
| SmallVesselStroke | MF0098               | Simple mode               | 21 | 0.0434  | 0.0505 | 0.4004 | -0.0025 | 0.0090 | 0.7799 | 25.1240 | 0.1565 | 396.7685 |
| SmallVesselStroke | MF0098               | Weighted mode             | 21 | 0.0327  | 0.0483 | 0.5062 | -0.0025 | 0.0090 | 0.7799 | 25.1240 | 0.1565 | 396.7685 |
| SmallVesselStroke | MF0100               | MR Egger                  | 21 | -1.2693 | 0.7092 | 0.0894 | 0.1605  | 0.0843 | 0.0721 | 22.9619 | 0.2907 | 1.0714   |
| SmallVesselStroke | MF0100               | Weighted median           | 21 | 0.0665  | 0.2655 | 0.8022 | 0.1605  | 0.0843 | 0.0721 | 22.9619 | 0.2907 | 1.0714   |
| SmallVesselStroke | MF0100               | Inverse variance weighted | 21 | 0.0358  | 0.1947 | 0.8540 | 0.1605  | 0.0843 | 0.0721 | 22.9619 | 0.2907 | 1.0714   |
| SmallVesselStroke | MF0100               | Simple mode               | 21 | -0.1096 | 0.5174 | 0.8343 | 0.1605  | 0.0843 | 0.0721 | 22.9619 | 0.2907 | 1.0714   |
| SmallVesselStroke | MF0100               | Weighted mode             | 21 | 0.0518  | 0.4658 | 0.9125 | 0.1605  | 0.0843 | 0.0721 | 22.9619 | 0.2907 | 1.0714   |
| SmallVesselStroke | MF0101               | MR Egger                  | 21 | 0.0468  | 0.2866 | 0.8721 | -0.0093 | 0.0340 | 0.7874 | 23.8264 | 0.2029 | 45.8861  |
| SmallVesselStroke | MF0101               | Weighted median           | 21 | -0.0004 | 0.0930 | 0.9967 | -0.0093 | 0.0340 | 0.7874 | 23.8264 | 0.2029 | 45.8861  |
| SmallVesselStroke | MF0101               | Inverse variance weighted | 21 | -0.0290 | 0.0722 | 0.6883 | -0.0093 | 0.0340 | 0.7874 | 23.8264 | 0.2029 | 45.8861  |
| SmallVesselStroke | MF0101               | Simple mode               | 21 | 0.0140  | 0.1874 | 0.9410 | -0.0093 | 0.0340 | 0.7874 | 23.8264 | 0.2029 | 45.8861  |
| SmallVesselStroke | MF0101               | Weighted mode             | 21 | 0.0481  | 0.1649 | 0.7736 | -0.0093 | 0.0340 | 0.7874 | 23.8264 | 0.2029 | 45.8861  |
| SmallVesselStroke | MF0102               | MR Egger                  | 21 | -0.0922 | 0.2903 | 0.7542 | 0.0163  | 0.0345 | 0.6428 | 29.5313 | 0.0581 | 42.6990  |
| SmallVesselStroke | MF0102               | Weighted median           | 21 | 0.0654  | 0.0885 | 0.4604 | 0.0163  | 0.0345 | 0.6428 | 29.5313 | 0.0581 | 42.6990  |
| SmallVesselStroke | MF0102               | Inverse variance weighted | 21 | 0.0400  | 0.0735 | 0.5864 | 0.0163  | 0.0345 | 0.6428 | 29.5313 | 0.0581 | 42.6990  |
| SmallVesselStroke | MF0102               | Simple mode               | 21 | 0.0857  | 0.1757 | 0.6308 | 0.0163  | 0.0345 | 0.6428 | 29.5313 | 0.0581 | 42.6990  |
| SmallVesselStroke | MF0102               | Weighted mode             | 21 | 0.0724  | 0.1675 | 0.6701 | 0.0163  | 0.0345 | 0.6428 | 29.5313 | 0.0581 | 42.6990  |
| SmallVesselStroke | MF0103               | MR Egger                  | 21 | 0.1558  | 0.1564 | 0.3317 | -0.0186 | 0.0186 | 0.3295 | 36.7520 | 0.0125 | 171.1735 |
| SmallVesselStroke | MF0103               | Weighted median           | 21 | 0.0509  | 0.0463 | 0.2719 | -0.0186 | 0.0186 | 0.3295 | 36.7520 | 0.0125 | 171.1735 |
| SmallVesselStroke | MF0103               | Inverse variance weighted | 21 | 0.0046  | 0.0404 | 0.9094 | -0.0186 | 0.0186 | 0.3295 | 36.7520 | 0.0125 | 171.1735 |
| SmallVesselStroke | MF0103               | Simple mode               | 21 | 0.1095  | 0.0893 | 0.2342 | -0.0186 | 0.0186 | 0.3295 | 36.7520 | 0.0125 | 171.1735 |
| SmallVesselStroke | MF0103               | Weighted mode             | 21 | 0.0913  | 0.0840 | 0.2901 | -0.0186 | 0.0186 | 0.3295 | 36.7520 | 0.0125 | 171.1735 |
| SmallVesselStroke | c_Bacilli            | MR Egger                  | 21 | -0.3993 | 0.2767 | 0.1653 | 0.0524  | 0.0329 | 0.1277 | 22.5912 | 0.3093 | 19.4025  |
| SmallVesselStroke | c_Bacilli            | Weighted median           | 21 | 0.0151  | 0.0990 | 0.8788 | 0.0524  | 0.0329 | 0.1277 | 22.5912 | 0.3093 | 19.4025  |
| SmallVesselStroke | c_Bacilli            | Inverse variance weighted | 21 | 0.0265  | 0.0741 | 0.7209 | 0.0524  | 0.0329 | 0.1277 | 22.5912 | 0.3093 | 19.4025  |
| SmallVesselStroke | c_Bacilli            | Simple mode               | 21 | -0.0951 | 0.1875 | 0.6176 | 0.0524  | 0.0329 | 0.1277 | 22.5912 | 0.3093 | 19.4025  |
| SmallVesselStroke | c_Bacilli            | Weighted mode             | 21 | -0.0849 | 0.1789 | 0.6402 | 0.0524  | 0.0329 | 0.1277 | 22.5912 | 0.3093 | 19.4025  |
| SmallVesselStroke | c_Betaproteobacteria | MR Egger                  | 21 | -0.1909 | 0.6620 | 0.7763 | 0.0241  | 0.0787 | 0.7629 | 32.0053 | 0.0312 | 4.1297   |
| SmallVesselStroke | c_Betaproteobacteria | Weighted median           | 21 | 0.1071  | 0.2020 | 0.5959 | 0.0241  | 0.0787 | 0.7629 | 32.0053 | 0.0312 | 4.1297   |
| SmallVesselStroke | c_Betaproteobacteria | Inverse variance weighted | 21 | 0.0049  | 0.1669 | 0.9764 | 0.0241  | 0.0787 | 0.7629 | 32.0053 | 0.0312 | 4.1297   |

|                   |                                          |                           |    |         |        |        |         |        |        |         |        |          |
|-------------------|------------------------------------------|---------------------------|----|---------|--------|--------|---------|--------|--------|---------|--------|----------|
| SmallVesselStroke | c_Betaproteobacteria                     | Simple mode               | 21 | 0.4435  | 0.4612 | 0.3478 | 0.0241  | 0.0787 | 0.7629 | 32.0053 | 0.0312 | 4.1297   |
| SmallVesselStroke | c_Betaproteobacteria                     | Weighted mode             | 21 | 0.4847  | 0.4524 | 0.2967 | 0.0241  | 0.0787 | 0.7629 | 32.0053 | 0.0312 | 4.1297   |
| SmallVesselStroke | c_Negativicutes                          | MR Egger                  | 21 | -0.9315 | 0.4462 | 0.0505 | 0.1184  | 0.0530 | 0.0378 | 28.0873 | 0.1073 | 28.0561  |
| SmallVesselStroke | c_Negativicutes                          | Weighted median           | 21 | -0.0566 | 0.1557 | 0.7162 | 0.1184  | 0.0530 | 0.0378 | 28.0873 | 0.1073 | 28.0561  |
| SmallVesselStroke | c_Negativicutes                          | Inverse variance weighted | 21 | 0.0312  | 0.1261 | 0.8048 | 0.1184  | 0.0530 | 0.0378 | 28.0873 | 0.1073 | 28.0561  |
| SmallVesselStroke | c_Negativicutes                          | Simple mode               | 21 | -0.1579 | 0.2695 | 0.5646 | 0.1184  | 0.0530 | 0.0378 | 28.0873 | 0.1073 | 28.0561  |
| SmallVesselStroke | c_Negativicutes                          | Weighted mode             | 21 | -0.1269 | 0.2871 | 0.6633 | 0.1184  | 0.0530 | 0.0378 | 28.0873 | 0.1073 | 28.0561  |
| SmallVesselStroke | f_Acidaminococcaceae                     | MR Egger                  | 21 | -0.7064 | 0.5048 | 0.1779 | 0.0740  | 0.0600 | 0.2326 | 16.3863 | 0.6924 | 14.4115  |
| SmallVesselStroke | f_Acidaminococcaceae                     | Weighted median           | 21 | -0.1213 | 0.1827 | 0.5066 | 0.0740  | 0.0600 | 0.2326 | 16.3863 | 0.6924 | 14.4115  |
| SmallVesselStroke | f_Acidaminococcaceae                     | Inverse variance weighted | 21 | -0.1050 | 0.1303 | 0.4204 | 0.0740  | 0.0600 | 0.2326 | 16.3863 | 0.6924 | 14.4115  |
| SmallVesselStroke | f_Acidaminococcaceae                     | Simple mode               | 21 | -0.1718 | 0.3358 | 0.6144 | 0.0740  | 0.0600 | 0.2326 | 16.3863 | 0.6924 | 14.4115  |
| SmallVesselStroke | f_Acidaminococcaceae                     | Weighted mode             | 21 | -0.1718 | 0.2913 | 0.5619 | 0.0740  | 0.0600 | 0.2326 | 16.3863 | 0.6924 | 14.4115  |
| SmallVesselStroke | f_Actinomycetaceae                       | MR Egger                  | 21 | -0.1888 | 0.2433 | 0.4475 | 0.0125  | 0.0289 | 0.6692 | 13.8380 | 0.7931 | 67.9948  |
| SmallVesselStroke | f_Actinomycetaceae                       | Weighted median           | 21 | -0.1598 | 0.0863 | 0.0640 | 0.0125  | 0.0289 | 0.6692 | 13.8380 | 0.7931 | 67.9948  |
| SmallVesselStroke | f_Actinomycetaceae                       | Inverse variance weighted | 21 | -0.0867 | 0.0628 | 0.1673 | 0.0125  | 0.0289 | 0.6692 | 13.8380 | 0.7931 | 67.9948  |
| SmallVesselStroke | f_Actinomycetaceae                       | Simple mode               | 21 | -0.2414 | 0.1627 | 0.1536 | 0.0125  | 0.0289 | 0.6692 | 13.8380 | 0.7931 | 67.9948  |
| SmallVesselStroke | f_Actinomycetaceae                       | Weighted mode             | 21 | -0.2414 | 0.1591 | 0.1448 | 0.0125  | 0.0289 | 0.6692 | 13.8380 | 0.7931 | 67.9948  |
| SmallVesselStroke | f_Aerococcaceae                          | MR Egger                  | 21 | -0.2293 | 0.4098 | 0.5824 | 0.0408  | 0.0487 | 0.4125 | 21.3915 | 0.3156 | 15.0529  |
| SmallVesselStroke | f_Aerococcaceae                          | Weighted median           | 21 | 0.0890  | 0.1384 | 0.5202 | 0.0408  | 0.0487 | 0.4125 | 21.3915 | 0.3156 | 15.0529  |
| SmallVesselStroke | f_Aerococcaceae                          | Inverse variance weighted | 21 | 0.1025  | 0.1050 | 0.3290 | 0.0408  | 0.0487 | 0.4125 | 21.3915 | 0.3156 | 15.0529  |
| SmallVesselStroke | f_Aerococcaceae                          | Simple mode               | 21 | 0.1405  | 0.2548 | 0.5874 | 0.0408  | 0.0487 | 0.4125 | 21.3915 | 0.3156 | 15.0529  |
| SmallVesselStroke | f_Aerococcaceae                          | Weighted mode             | 21 | 0.1596  | 0.2366 | 0.5077 | 0.0408  | 0.0487 | 0.4125 | 21.3915 | 0.3156 | 15.0529  |
| SmallVesselStroke | f_Bacillaceae                            | MR Egger                  | 21 | -0.2522 | 0.4741 | 0.6010 | 0.0085  | 0.0563 | 0.8818 | 37.2489 | 0.0074 | 9.1358   |
| SmallVesselStroke | f_Bacillaceae                            | Weighted median           | 21 | -0.3701 | 0.1362 | 0.0066 | 0.0085  | 0.0563 | 0.8818 | 37.2489 | 0.0074 | 9.1358   |
| SmallVesselStroke | f_Bacillaceae                            | Inverse variance weighted | 21 | -0.1831 | 0.1193 | 0.1249 | 0.0085  | 0.0563 | 0.8818 | 37.2489 | 0.0074 | 9.1358   |
| SmallVesselStroke | f_Bacillaceae                            | Simple mode               | 21 | -0.4191 | 0.2490 | 0.1079 | 0.0085  | 0.0563 | 0.8818 | 37.2489 | 0.0074 | 9.1358   |
| SmallVesselStroke | f_Bacillaceae                            | Weighted mode             | 21 | -0.4037 | 0.2224 | 0.0844 | 0.0085  | 0.0563 | 0.8818 | 37.2489 | 0.0074 | 9.1358   |
| SmallVesselStroke | f_Bifidobacteriaceae                     | MR Egger                  | 21 | -0.4418 | 0.4780 | 0.3669 | 0.0439  | 0.0568 | 0.4487 | 19.0558 | 0.4533 | 4.7741   |
| SmallVesselStroke | f_Bifidobacteriaceae                     | Weighted median           | 21 | -0.0071 | 0.1798 | 0.9684 | 0.0439  | 0.0568 | 0.4487 | 19.0558 | 0.4533 | 4.7741   |
| SmallVesselStroke | f_Bifidobacteriaceae                     | Inverse variance weighted | 21 | -0.0846 | 0.1232 | 0.4922 | 0.0439  | 0.0568 | 0.4487 | 19.0558 | 0.4533 | 4.7741   |
| SmallVesselStroke | f_Bifidobacteriaceae                     | Simple mode               | 21 | 0.0480  | 0.3329 | 0.8868 | 0.0439  | 0.0568 | 0.4487 | 19.0558 | 0.4533 | 4.7741   |
| SmallVesselStroke | f_Bifidobacteriaceae                     | Weighted mode             | 21 | 0.0480  | 0.3470 | 0.8914 | 0.0439  | 0.0568 | 0.4487 | 19.0558 | 0.4533 | 4.7741   |
| SmallVesselStroke | f_Burkholderiaceae                       | MR Egger                  | 21 | -0.4141 | 0.5039 | 0.4214 | 0.0571  | 0.0599 | 0.3526 | 16.7035 | 0.6100 | 22.1855  |
| SmallVesselStroke | f_Burkholderiaceae                       | Weighted median           | 21 | 0.0418  | 0.1867 | 0.8227 | 0.0571  | 0.0599 | 0.3526 | 16.7035 | 0.6100 | 22.1855  |
| SmallVesselStroke | f_Burkholderiaceae                       | Inverse variance weighted | 21 | 0.0499  | 0.1300 | 0.7013 | 0.0571  | 0.0599 | 0.3526 | 16.7035 | 0.6100 | 22.1855  |
| SmallVesselStroke | f_Burkholderiaceae                       | Simple mode               | 21 | 0.4089  | 0.4010 | 0.3200 | 0.0571  | 0.0599 | 0.3526 | 16.7035 | 0.6100 | 22.1855  |
| SmallVesselStroke | f_Burkholderiaceae                       | Weighted mode             | 21 | -0.4024 | 0.3575 | 0.2737 | 0.0571  | 0.0599 | 0.3526 | 16.7035 | 0.6100 | 22.1855  |
| SmallVesselStroke | f_Clostridiales_Family_XI_Incertae_Sedis | MR Egger                  | 21 | -0.6119 | 0.4590 | 0.1983 | 0.0421  | 0.0545 | 0.4501 | 21.6271 | 0.3032 | 18.2632  |
| SmallVesselStroke | f_Clostridiales_Family_XI_Incertae_Sedis | Weighted median           | 21 | -0.3379 | 0.1646 | 0.0400 | 0.0421  | 0.0545 | 0.4501 | 21.6271 | 0.3032 | 18.2632  |
| SmallVesselStroke | f_Clostridiales_Family_XI_Incertae_Sedis | Inverse variance weighted | 21 | -0.2699 | 0.1173 | 0.0213 | 0.0421  | 0.0545 | 0.4501 | 21.6271 | 0.3032 | 18.2632  |
| SmallVesselStroke | f_Clostridiales_Family_XI_Incertae_Sedis | Simple mode               | 21 | -0.2808 | 0.2899 | 0.3444 | 0.0421  | 0.0545 | 0.4501 | 21.6271 | 0.3032 | 18.2632  |
| SmallVesselStroke | f_Clostridiales_Family_XI_Incertae_Sedis | Weighted mode             | 21 | -0.3161 | 0.2715 | 0.2579 | 0.0421  | 0.0545 | 0.4501 | 21.6271 | 0.3032 | 18.2632  |
| SmallVesselStroke | f_Coriobacteriaceae                      | MR Egger                  | 21 | -0.4964 | 0.3826 | 0.2100 | 0.0515  | 0.0455 | 0.2716 | 15.5419 | 0.7446 | 35.3150  |
| SmallVesselStroke | f_Coriobacteriaceae                      | Weighted median           | 21 | -0.0731 | 0.1352 | 0.5885 | 0.0515  | 0.0455 | 0.2716 | 15.5419 | 0.7446 | 35.3150  |
| SmallVesselStroke | f_Coriobacteriaceae                      | Inverse variance weighted | 21 | -0.0779 | 0.0987 | 0.4303 | 0.0515  | 0.0455 | 0.2716 | 15.5419 | 0.7446 | 35.3150  |
| SmallVesselStroke | f_Coriobacteriaceae                      | Simple mode               | 21 | -0.3360 | 0.2339 | 0.1664 | 0.0515  | 0.0455 | 0.2716 | 15.5419 | 0.7446 | 35.3150  |
| SmallVesselStroke | f_Coriobacteriaceae                      | Weighted mode             | 21 | -0.3046 | 0.2314 | 0.2029 | 0.0515  | 0.0455 | 0.2716 | 15.5419 | 0.7446 | 35.3150  |
| SmallVesselStroke | f_Enterobacteriaceae                     | MR Egger                  | 21 | 0.0190  | 0.5446 | 0.9725 | -0.0050 | 0.0647 | 0.9391 | 21.3652 | 0.3170 | 12.3896  |
| SmallVesselStroke | f_Enterobacteriaceae                     | Weighted median           | 21 | 0.0057  | 0.1890 | 0.9760 | -0.0050 | 0.0647 | 0.9391 | 21.3652 | 0.3170 | 12.3896  |
| SmallVesselStroke | f_Enterobacteriaceae                     | Inverse variance weighted | 21 | -0.0217 | 0.1370 | 0.8741 | -0.0050 | 0.0647 | 0.9391 | 21.3652 | 0.3170 | 12.3896  |
| SmallVesselStroke | f_Enterobacteriaceae                     | Simple mode               | 21 | -0.2023 | 0.3894 | 0.6092 | -0.0050 | 0.0647 | 0.9391 | 21.3652 | 0.3170 | 12.3896  |
| SmallVesselStroke | f_Enterobacteriaceae                     | Weighted mode             | 21 | -0.1441 | 0.3461 | 0.6816 | -0.0050 | 0.0647 | 0.9391 | 21.3652 | 0.3170 | 12.3896  |
| SmallVesselStroke | f_Eubacteriaceae                         | MR Egger                  | 21 | -0.1869 | 0.3574 | 0.6070 | 0.0329  | 0.0425 | 0.4477 | 20.5225 | 0.3638 | 27.4567  |
| SmallVesselStroke | f_Eubacteriaceae                         | Weighted median           | 21 | 0.0706  | 0.1278 | 0.5803 | 0.0329  | 0.0425 | 0.4477 | 20.5225 | 0.3638 | 27.4567  |
| SmallVesselStroke | f_Eubacteriaceae                         | Inverse variance weighted | 21 | 0.0808  | 0.0913 | 0.3763 | 0.0329  | 0.0425 | 0.4477 | 20.5225 | 0.3638 | 27.4567  |
| SmallVesselStroke | f_Eubacteriaceae                         | Simple mode               | 21 | 0.1128  | 0.2457 | 0.6510 | 0.0329  | 0.0425 | 0.4477 | 20.5225 | 0.3638 | 27.4567  |
| SmallVesselStroke | f_Eubacteriaceae                         | Weighted mode             | 21 | 0.1441  | 0.2300 | 0.5381 | 0.0329  | 0.0425 | 0.4477 | 20.5225 | 0.3638 | 27.4567  |
| SmallVesselStroke | f_Lachnospiraceae                        | MR Egger                  | 21 | -0.0730 | 0.2449 | 0.7689 | 0.0159  | 0.0291 | 0.5918 | 23.9180 | 0.1993 | 103.6609 |
| SmallVesselStroke | f_Lachnospiraceae                        | Weighted median           | 21 | 0.0442  | 0.0784 | 0.5729 | 0.0159  | 0.0291 | 0.5918 | 23.9180 | 0.1993 | 103.6609 |
| SmallVesselStroke | f_Lachnospiraceae                        | Inverse variance weighted | 21 | 0.0561  | 0.0621 | 0.3663 | 0.0159  | 0.0291 | 0.5918 | 23.9180 | 0.1993 | 103.6609 |
| SmallVesselStroke | f_Lachnospiraceae                        | Simple mode               | 21 | 0.1034  | 0.1486 | 0.4947 | 0.0159  | 0.0291 | 0.5918 | 23.9180 | 0.1993 | 103.6609 |

|                   |                         |                           |    |         |        |        |         |        |        |         |        |          |
|-------------------|-------------------------|---------------------------|----|---------|--------|--------|---------|--------|--------|---------|--------|----------|
| SmallVesselStroke | f_Lachnospiraceae       | Weighted mode             | 21 | 0.0655  | 0.1351 | 0.6329 | 0.0159  | 0.0291 | 0.5918 | 23.9180 | 0.1993 | 103.6609 |
| SmallVesselStroke | f_Lactobacillaceae      | MR Egger                  | 21 | -0.6875 | 0.3961 | 0.0988 | 0.0749  | 0.0471 | 0.1280 | 13.9364 | 0.8337 | 10.6372  |
| SmallVesselStroke | f_Lactobacillaceae      | Weighted median           | 21 | -0.0371 | 0.1380 | 0.7883 | 0.0749  | 0.0471 | 0.1280 | 13.9364 | 0.8337 | 10.6372  |
| SmallVesselStroke | f_Lactobacillaceae      | Inverse variance weighted | 21 | -0.0786 | 0.1022 | 0.4419 | 0.0749  | 0.0471 | 0.1280 | 13.9364 | 0.8337 | 10.6372  |
| SmallVesselStroke | f_Lactobacillaceae      | Simple mode               | 21 | -0.0878 | 0.2503 | 0.7294 | 0.0749  | 0.0471 | 0.1280 | 13.9364 | 0.8337 | 10.6372  |
| SmallVesselStroke | f_Lactobacillaceae      | Weighted mode             | 21 | -0.0611 | 0.2168 | 0.7811 | 0.0749  | 0.0471 | 0.1280 | 13.9364 | 0.8337 | 10.6372  |
| SmallVesselStroke | f_Leuconostocaceae      | MR Egger                  | 21 | -0.9392 | 0.7055 | 0.1988 | 0.1137  | 0.0838 | 0.1908 | 30.9416 | 0.0560 | 1.6040   |
| SmallVesselStroke | f_Leuconostocaceae      | Weighted median           | 21 | -0.1212 | 0.2194 | 0.5808 | 0.1137  | 0.0838 | 0.1908 | 30.9416 | 0.0560 | 1.6040   |
| SmallVesselStroke | f_Leuconostocaceae      | Inverse variance weighted | 21 | -0.0147 | 0.1858 | 0.9371 | 0.1137  | 0.0838 | 0.1908 | 30.9416 | 0.0560 | 1.6040   |
| SmallVesselStroke | f_Leuconostocaceae      | Simple mode               | 21 | -0.2909 | 0.4759 | 0.5480 | 0.1137  | 0.0838 | 0.1908 | 30.9416 | 0.0560 | 1.6040   |
| SmallVesselStroke | f_Leuconostocaceae      | Weighted mode             | 21 | -0.3121 | 0.4398 | 0.4861 | 0.1137  | 0.0838 | 0.1908 | 30.9416 | 0.0560 | 1.6040   |
| SmallVesselStroke | f_Neisseriaceae         | MR Egger                  | 21 | -0.7422 | 0.6026 | 0.2331 | 0.1018  | 0.0716 | 0.1711 | 24.6063 | 0.2169 | 8.4052   |
| SmallVesselStroke | f_Neisseriaceae         | Weighted median           | 21 | -0.2066 | 0.2056 | 0.3149 | 0.1018  | 0.0716 | 0.1711 | 24.6063 | 0.2169 | 8.4052   |
| SmallVesselStroke | f_Neisseriaceae         | Inverse variance weighted | 21 | 0.0860  | 0.1594 | 0.5898 | 0.1018  | 0.0716 | 0.1711 | 24.6063 | 0.2169 | 8.4052   |
| SmallVesselStroke | f_Neisseriaceae         | Simple mode               | 21 | -0.3445 | 0.3819 | 0.3777 | 0.1018  | 0.0716 | 0.1711 | 24.6063 | 0.2169 | 8.4052   |
| SmallVesselStroke | f_Neisseriaceae         | Weighted mode             | 21 | -0.3699 | 0.3516 | 0.3054 | 0.1018  | 0.0716 | 0.1711 | 24.6063 | 0.2169 | 8.4052   |
| SmallVesselStroke | f_Peptostreptococcaceae | MR Egger                  | 21 | 0.0760  | 0.4099 | 0.8548 | -0.0062 | 0.0487 | 0.9008 | 18.4893 | 0.4900 | 33.3963  |
| SmallVesselStroke | f_Peptostreptococcaceae | Weighted median           | 21 | 0.0285  | 0.1434 | 0.8427 | -0.0062 | 0.0487 | 0.9008 | 18.4893 | 0.4900 | 33.3963  |
| SmallVesselStroke | f_Peptostreptococcaceae | Inverse variance weighted | 21 | 0.0260  | 0.1058 | 0.8058 | -0.0062 | 0.0487 | 0.9008 | 18.4893 | 0.4900 | 33.3963  |
| SmallVesselStroke | f_Peptostreptococcaceae | Simple mode               | 21 | 0.0493  | 0.2832 | 0.8635 | -0.0062 | 0.0487 | 0.9008 | 18.4893 | 0.4900 | 33.3963  |
| SmallVesselStroke | f_Peptostreptococcaceae | Weighted mode             | 21 | 0.0680  | 0.2420 | 0.7817 | -0.0062 | 0.0487 | 0.9008 | 18.4893 | 0.4900 | 33.3963  |
| SmallVesselStroke | f_Porphyromonadaceae    | MR Egger                  | 21 | 0.1369  | 0.2339 | 0.5651 | -0.0111 | 0.0278 | 0.6936 | 18.3144 | 0.5015 | 122.6781 |
| SmallVesselStroke | f_Porphyromonadaceae    | Weighted median           | 21 | -0.0286 | 0.0834 | 0.7317 | -0.0111 | 0.0278 | 0.6936 | 18.3144 | 0.5015 | 122.6781 |
| SmallVesselStroke | f_Porphyromonadaceae    | Inverse variance weighted | 21 | 0.0466  | 0.0604 | 0.4405 | -0.0111 | 0.0278 | 0.6936 | 18.3144 | 0.5015 | 122.6781 |
| SmallVesselStroke | f_Porphyromonadaceae    | Simple mode               | 21 | -0.0945 | 0.1531 | 0.5442 | -0.0111 | 0.0278 | 0.6936 | 18.3144 | 0.5015 | 122.6781 |
| SmallVesselStroke | f_Porphyromonadaceae    | Weighted mode             | 21 | -0.0674 | 0.1465 | 0.6505 | -0.0111 | 0.0278 | 0.6936 | 18.3144 | 0.5015 | 122.6781 |
| SmallVesselStroke | f_Prevotellaceae        | MR Egger                  | 21 | -0.3591 | 1.0128 | 0.7268 | 0.0468  | 0.1203 | 0.7016 | 36.3566 | 0.0095 | 77.4108  |
| SmallVesselStroke | f_Prevotellaceae        | Weighted median           | 21 | -0.2659 | 0.2988 | 0.3735 | 0.0468  | 0.1203 | 0.7016 | 36.3566 | 0.0095 | 77.4108  |
| SmallVesselStroke | f_Prevotellaceae        | Inverse variance weighted | 21 | 0.0215  | 0.2558 | 0.9329 | 0.0468  | 0.1203 | 0.7016 | 36.3566 | 0.0095 | 77.4108  |
| SmallVesselStroke | f_Prevotellaceae        | Simple mode               | 21 | -0.3536 | 0.6643 | 0.6003 | 0.0468  | 0.1203 | 0.7016 | 36.3566 | 0.0095 | 77.4108  |
| SmallVesselStroke | f_Prevotellaceae        | Weighted mode             | 21 | -0.3536 | 0.5253 | 0.5085 | 0.0468  | 0.1203 | 0.7016 | 36.3566 | 0.0095 | 77.4108  |
| SmallVesselStroke | f_Staphylococcaceae     | MR Egger                  | 21 | 0.1254  | 0.5600 | 0.8252 | -0.0168 | 0.0665 | 0.8031 | 31.5817 | 0.0348 | 20.5959  |
| SmallVesselStroke | f_Staphylococcaceae     | Weighted median           | 21 | -0.0706 | 0.1670 | 0.6722 | -0.0168 | 0.0665 | 0.8031 | 31.5817 | 0.0348 | 20.5959  |
| SmallVesselStroke | f_Staphylococcaceae     | Inverse variance weighted | 21 | -0.0114 | 0.1411 | 0.9355 | -0.0168 | 0.0665 | 0.8031 | 31.5817 | 0.0348 | 20.5959  |
| SmallVesselStroke | f_Staphylococcaceae     | Simple mode               | 21 | 0.1417  | 0.3001 | 0.6420 | -0.0168 | 0.0665 | 0.8031 | 31.5817 | 0.0348 | 20.5959  |
| SmallVesselStroke | f_Staphylococcaceae     | Weighted mode             | 21 | -0.0284 | 0.2832 | 0.9211 | -0.0168 | 0.0665 | 0.8031 | 31.5817 | 0.0348 | 20.5959  |
| SmallVesselStroke | f_Streptococcaceae      | MR Egger                  | 21 | -0.3177 | 0.3545 | 0.3814 | 0.0443  | 0.0421 | 0.3064 | 22.6840 | 0.3046 | 8.9405   |
| SmallVesselStroke | f_Streptococcaceae      | Weighted median           | 21 | -0.0388 | 0.1250 | 0.7564 | 0.0443  | 0.0421 | 0.3064 | 22.6840 | 0.3046 | 8.9405   |
| SmallVesselStroke | f_Streptococcaceae      | Inverse variance weighted | 21 | 0.0423  | 0.0918 | 0.6450 | 0.0443  | 0.0421 | 0.3064 | 22.6840 | 0.3046 | 8.9405   |
| SmallVesselStroke | f_Streptococcaceae      | Simple mode               | 21 | -0.1310 | 0.2301 | 0.5756 | 0.0443  | 0.0421 | 0.3064 | 22.6840 | 0.3046 | 8.9405   |
| SmallVesselStroke | f_Streptococcaceae      | Weighted mode             | 21 | -0.1180 | 0.2079 | 0.5767 | 0.0443  | 0.0421 | 0.3064 | 22.6840 | 0.3046 | 8.9405   |
| SmallVesselStroke | f_Sutterellaceae        | MR Egger                  | 21 | -0.3092 | 0.8781 | 0.7287 | 0.0410  | 0.1043 | 0.6985 | 35.2198 | 0.0131 | 2.3429   |
| SmallVesselStroke | f_Sutterellaceae        | Weighted median           | 21 | 0.1057  | 0.2667 | 0.6918 | 0.0410  | 0.1043 | 0.6985 | 35.2198 | 0.0131 | 2.3429   |
| SmallVesselStroke | f_Sutterellaceae        | Inverse variance weighted | 21 | 0.0245  | 0.2217 | 0.9122 | 0.0410  | 0.1043 | 0.6985 | 35.2198 | 0.0131 | 2.3429   |
| SmallVesselStroke | f_Sutterellaceae        | Simple mode               | 21 | 0.4725  | 0.5768 | 0.4224 | 0.0410  | 0.1043 | 0.6985 | 35.2198 | 0.0131 | 2.3429   |
| SmallVesselStroke | f_Sutterellaceae        | Weighted mode             | 21 | 0.5388  | 0.5261 | 0.3180 | 0.0410  | 0.1043 | 0.6985 | 35.2198 | 0.0131 | 2.3429   |
| SmallVesselStroke | f_Veillonellaceae       | MR Egger                  | 21 | -0.5047 | 0.5199 | 0.3439 | 0.0868  | 0.0618 | 0.1760 | 26.4256 | 0.1522 | 23.7179  |
| SmallVesselStroke | f_Veillonellaceae       | Weighted median           | 21 | 0.1556  | 0.1790 | 0.3848 | 0.0868  | 0.0618 | 0.1760 | 26.4256 | 0.1522 | 23.7179  |
| SmallVesselStroke | f_Veillonellaceae       | Inverse variance weighted | 21 | 0.2012  | 0.1374 | 0.1430 | 0.0868  | 0.0618 | 0.1760 | 26.4256 | 0.1522 | 23.7179  |
| SmallVesselStroke | f_Veillonellaceae       | Simple mode               | 21 | 0.2230  | 0.3529 | 0.5346 | 0.0868  | 0.0618 | 0.1760 | 26.4256 | 0.1522 | 23.7179  |
| SmallVesselStroke | f_Veillonellaceae       | Weighted mode             | 21 | 0.2230  | 0.3508 | 0.5322 | 0.0868  | 0.0618 | 0.1760 | 26.4256 | 0.1522 | 23.7179  |
| SmallVesselStroke | g_Abiotrophia           | MR Egger                  | 21 | -0.1041 | 0.4761 | 0.8292 | 0.0279  | 0.0566 | 0.6277 | 22.3915 | 0.2652 | 8.4659   |
| SmallVesselStroke | g_Abiotrophia           | Weighted median           | 21 | 0.0971  | 0.1617 | 0.5481 | 0.0279  | 0.0566 | 0.6277 | 22.3915 | 0.2652 | 8.4659   |
| SmallVesselStroke | g_Abiotrophia           | Inverse variance weighted | 21 | 0.1226  | 0.1205 | 0.3089 | 0.0279  | 0.0566 | 0.6277 | 22.3915 | 0.2652 | 8.4659   |
| SmallVesselStroke | g_Abiotrophia           | Simple mode               | 21 | 0.1135  | 0.2865 | 0.6962 | 0.0279  | 0.0566 | 0.6277 | 22.3915 | 0.2652 | 8.4659   |
| SmallVesselStroke | g_Abiotrophia           | Weighted mode             | 21 | 0.1507  | 0.2832 | 0.6005 | 0.0279  | 0.0566 | 0.6277 | 22.3915 | 0.2652 | 8.4659   |
| SmallVesselStroke | g_Acidaminococcus       | MR Egger                  | 21 | 0.8862  | 0.5144 | 0.1012 | -0.1017 | 0.0611 | 0.1124 | 21.1014 | 0.3912 | 2.7945   |
| SmallVesselStroke | g_Acidaminococcus       | Weighted median           | 21 | 0.1157  | 0.1873 | 0.5367 | -0.1017 | 0.0611 | 0.1124 | 21.1014 | 0.3912 | 2.7945   |
| SmallVesselStroke | g_Acidaminococcus       | Inverse variance weighted | 21 | 0.0590  | 0.1364 | 0.6656 | -0.1017 | 0.0611 | 0.1124 | 21.1014 | 0.3912 | 2.7945   |
| SmallVesselStroke | g_Acidaminococcus       | Simple mode               | 21 | 0.1819  | 0.3397 | 0.5984 | -0.1017 | 0.0611 | 0.1124 | 21.1014 | 0.3912 | 2.7945   |
| SmallVesselStroke | g_Acidaminococcus       | Weighted mode             | 21 | 0.1647  | 0.3512 | 0.6441 | -0.1017 | 0.0611 | 0.1124 | 21.1014 | 0.3912 | 2.7945   |

|                   |                   |                           |    |         |        |        |         |        |        |         |        |         |
|-------------------|-------------------|---------------------------|----|---------|--------|--------|---------|--------|--------|---------|--------|---------|
| SmallVesselStroke | g_Actinomyces     | MR Egger                  | 21 | 0.0725  | 0.3623 | 0.8434 | -0.0084 | 0.0430 | 0.8473 | 20.3505 | 0.3738 | 57.8637 |
| SmallVesselStroke | g_Actinomyces     | Weighted median           | 21 | -0.0338 | 0.1327 | 0.7986 | -0.0084 | 0.0430 | 0.8473 | 20.3505 | 0.3738 | 57.8637 |
| SmallVesselStroke | g_Actinomyces     | Inverse variance weighted | 21 | 0.0042  | 0.0912 | 0.9633 | -0.0084 | 0.0430 | 0.8473 | 20.3505 | 0.3738 | 57.8637 |
| SmallVesselStroke | g_Actinomyces     | Simple mode               | 21 | -0.1145 | 0.2520 | 0.6544 | -0.0084 | 0.0430 | 0.8473 | 20.3505 | 0.3738 | 57.8637 |
| SmallVesselStroke | g_Actinomyces     | Weighted mode             | 21 | -0.1355 | 0.2475 | 0.5901 | -0.0084 | 0.0430 | 0.8473 | 20.3505 | 0.3738 | 57.8637 |
| SmallVesselStroke | g_Aggregatibacter | MR Egger                  | 21 | -0.9510 | 0.6471 | 0.1580 | 0.1451  | 0.0769 | 0.0744 | 24.7163 | 0.2125 | 6.7160  |
| SmallVesselStroke | g_Aggregatibacter | Weighted median           | 21 | 0.1472  | 0.2267 | 0.5160 | 0.1451  | 0.0769 | 0.0744 | 24.7163 | 0.2125 | 6.7160  |
| SmallVesselStroke | g_Aggregatibacter | Inverse variance weighted | 21 | 0.2293  | 0.1774 | 0.1960 | 0.1451  | 0.0769 | 0.0744 | 24.7163 | 0.2125 | 6.7160  |
| SmallVesselStroke | g_Aggregatibacter | Simple mode               | 21 | -0.0524 | 0.4094 | 0.8994 | 0.1451  | 0.0769 | 0.0744 | 24.7163 | 0.2125 | 6.7160  |
| SmallVesselStroke | g_Aggregatibacter | Weighted mode             | 21 | -0.0150 | 0.4126 | 0.9714 | 0.1451  | 0.0769 | 0.0744 | 24.7163 | 0.2125 | 6.7160  |
| SmallVesselStroke | g_Alistipes       | MR Egger                  | 21 | 0.2911  | 0.5686 | 0.6146 | -0.0226 | 0.0676 | 0.7412 | 26.2310 | 0.1239 | 2.8122  |
| SmallVesselStroke | g_Alistipes       | Weighted median           | 21 | 0.1343  | 0.1787 | 0.4523 | -0.0226 | 0.0676 | 0.7412 | 26.2310 | 0.1239 | 2.8122  |
| SmallVesselStroke | g_Alistipes       | Inverse variance weighted | 21 | 0.1070  | 0.1435 | 0.4558 | -0.0226 | 0.0676 | 0.7412 | 26.2310 | 0.1239 | 2.8122  |
| SmallVesselStroke | g_Alistipes       | Simple mode               | 21 | 0.2209  | 0.3043 | 0.4763 | -0.0226 | 0.0676 | 0.7412 | 26.2310 | 0.1239 | 2.8122  |
| SmallVesselStroke | g_Alistipes       | Weighted mode             | 21 | 0.2038  | 0.2681 | 0.4560 | -0.0226 | 0.0676 | 0.7412 | 26.2310 | 0.1239 | 2.8122  |
| SmallVesselStroke | g_Anaerococcus    | MR Egger                  | 21 | -0.7256 | 0.5360 | 0.1917 | 0.0654  | 0.0637 | 0.3176 | 21.6295 | 0.3610 | 5.9748  |
| SmallVesselStroke | g_Anaerococcus    | Weighted median           | 21 | -0.2675 | 0.1913 | 0.1620 | 0.0654  | 0.0637 | 0.3176 | 21.6295 | 0.3610 | 5.9748  |
| SmallVesselStroke | g_Anaerococcus    | Inverse variance weighted | 21 | -0.1941 | 0.1386 | 0.1612 | 0.0654  | 0.0637 | 0.3176 | 21.6295 | 0.3610 | 5.9748  |
| SmallVesselStroke | g_Anaerococcus    | Simple mode               | 21 | -0.5435 | 0.3975 | 0.1867 | 0.0654  | 0.0637 | 0.3176 | 21.6295 | 0.3610 | 5.9748  |
| SmallVesselStroke | g_Anaerococcus    | Weighted mode             | 21 | -0.5521 | 0.3561 | 0.1367 | 0.0654  | 0.0637 | 0.3176 | 21.6295 | 0.3610 | 5.9748  |
| SmallVesselStroke | g_Anaerofustis    | MR Egger                  | 21 | 0.0489  | 0.3383 | 0.8867 | -0.0227 | 0.0402 | 0.5794 | 22.3513 | 0.2671 | 70.7831 |
| SmallVesselStroke | g_Anaerofustis    | Weighted median           | 21 | -0.1109 | 0.1139 | 0.3306 | -0.0227 | 0.0402 | 0.5794 | 22.3513 | 0.2671 | 70.7831 |
| SmallVesselStroke | g_Anaerofustis    | Inverse variance weighted | 21 | -0.1354 | 0.0858 | 0.1144 | -0.0227 | 0.0402 | 0.5794 | 22.3513 | 0.2671 | 70.7831 |
| SmallVesselStroke | g_Anaerofustis    | Simple mode               | 21 | -0.1797 | 0.2139 | 0.4108 | -0.0227 | 0.0402 | 0.5794 | 22.3513 | 0.2671 | 70.7831 |
| SmallVesselStroke | g_Anaerofustis    | Weighted mode             | 21 | -0.1117 | 0.1988 | 0.5802 | -0.0227 | 0.0402 | 0.5794 | 22.3513 | 0.2671 | 70.7831 |
| SmallVesselStroke | g_Anaerostipes    | MR Egger                  | 21 | 0.0482  | 0.2820 | 0.8661 | 0.0027  | 0.0335 | 0.9365 | 19.0528 | 0.4535 | 42.8415 |
| SmallVesselStroke | g_Anaerostipes    | Weighted median           | 21 | 0.1438  | 0.0980 | 0.1425 | 0.0027  | 0.0335 | 0.9365 | 19.0528 | 0.4535 | 42.8415 |
| SmallVesselStroke | g_Anaerostipes    | Inverse variance weighted | 21 | 0.0702  | 0.0727 | 0.3341 | 0.0027  | 0.0335 | 0.9365 | 19.0528 | 0.4535 | 42.8415 |
| SmallVesselStroke | g_Anaerostipes    | Simple mode               | 21 | 0.0692  | 0.1980 | 0.7304 | 0.0027  | 0.0335 | 0.9365 | 19.0528 | 0.4535 | 42.8415 |
| SmallVesselStroke | g_Anaerostipes    | Weighted mode             | 21 | 0.1240  | 0.2004 | 0.5432 | 0.0027  | 0.0335 | 0.9365 | 19.0528 | 0.4535 | 42.8415 |
| SmallVesselStroke | g_Anaerotruncus   | MR Egger                  | 21 | 0.1010  | 0.2484 | 0.6890 | -0.0085 | 0.0295 | 0.7774 | 16.2855 | 0.6382 | 45.9992 |
| SmallVesselStroke | g_Anaerotruncus   | Weighted median           | 21 | 0.0060  | 0.0897 | 0.9469 | -0.0085 | 0.0295 | 0.7774 | 16.2855 | 0.6382 | 45.9992 |
| SmallVesselStroke | g_Anaerotruncus   | Inverse variance weighted | 21 | 0.0321  | 0.0641 | 0.6164 | -0.0085 | 0.0295 | 0.7774 | 16.2855 | 0.6382 | 45.9992 |
| SmallVesselStroke | g_Anaerotruncus   | Simple mode               | 21 | -0.0048 | 0.1583 | 0.9759 | -0.0085 | 0.0295 | 0.7774 | 16.2855 | 0.6382 | 45.9992 |
| SmallVesselStroke | g_Anaerotruncus   | Weighted mode             | 21 | -0.0016 | 0.1478 | 0.9916 | -0.0085 | 0.0295 | 0.7774 | 16.2855 | 0.6382 | 45.9992 |
| SmallVesselStroke | g_Atopobium       | MR Egger                  | 21 | -0.4205 | 0.3164 | 0.1996 | 0.0454  | 0.0376 | 0.2425 | 23.3930 | 0.2699 | 21.1653 |
| SmallVesselStroke | g_Atopobium       | Weighted median           | 21 | 0.0094  | 0.1092 | 0.9314 | 0.0454  | 0.0376 | 0.2425 | 23.3930 | 0.2699 | 21.1653 |
| SmallVesselStroke | g_Atopobium       | Inverse variance weighted | 21 | -0.0517 | 0.0826 | 0.5314 | 0.0454  | 0.0376 | 0.2425 | 23.3930 | 0.2699 | 21.1653 |
| SmallVesselStroke | g_Atopobium       | Simple mode               | 21 | 0.1843  | 0.2131 | 0.3973 | 0.0454  | 0.0376 | 0.2425 | 23.3930 | 0.2699 | 21.1653 |
| SmallVesselStroke | g_Atopobium       | Weighted mode             | 21 | 0.2081  | 0.2024 | 0.3162 | 0.0454  | 0.0376 | 0.2425 | 23.3930 | 0.2699 | 21.1653 |
| SmallVesselStroke | g_Bacteroides     | MR Egger                  | 21 | 0.2618  | 0.3416 | 0.4529 | -0.0290 | 0.0406 | 0.4833 | 35.2107 | 0.0132 | 29.2772 |
| SmallVesselStroke | g_Bacteroides     | Weighted median           | 21 | 0.1106  | 0.1050 | 0.2919 | -0.0290 | 0.0406 | 0.4833 | 35.2107 | 0.0132 | 29.2772 |
| SmallVesselStroke | g_Bacteroides     | Inverse variance weighted | 21 | 0.0258  | 0.0871 | 0.7668 | -0.0290 | 0.0406 | 0.4833 | 35.2107 | 0.0132 | 29.2772 |
| SmallVesselStroke | g_Bacteroides     | Simple mode               | 21 | 0.1760  | 0.2059 | 0.4029 | -0.0290 | 0.0406 | 0.4833 | 35.2107 | 0.0132 | 29.2772 |
| SmallVesselStroke | g_Bacteroides     | Weighted mode             | 21 | 0.1760  | 0.1619 | 0.2900 | -0.0290 | 0.0406 | 0.4833 | 35.2107 | 0.0132 | 29.2772 |
| SmallVesselStroke | g_Blautia         | MR Egger                  | 21 | -0.0178 | 0.2769 | 0.9495 | 0.0002  | 0.0329 | 0.9944 | 30.1940 | 0.0494 | 92.3916 |
| SmallVesselStroke | g_Blautia         | Weighted median           | 21 | 0.0200  | 0.0851 | 0.8138 | 0.0002  | 0.0329 | 0.9944 | 30.1940 | 0.0494 | 92.3916 |
| SmallVesselStroke | g_Blautia         | Inverse variance weighted | 21 | -0.0159 | 0.0696 | 0.8197 | 0.0002  | 0.0329 | 0.9944 | 30.1940 | 0.0494 | 92.3916 |
| SmallVesselStroke | g_Blautia         | Simple mode               | 21 | 0.0676  | 0.1681 | 0.6919 | 0.0002  | 0.0329 | 0.9944 | 30.1940 | 0.0494 | 92.3916 |
| SmallVesselStroke | g_Blautia         | Weighted mode             | 21 | 0.0637  | 0.1496 | 0.6749 | 0.0002  | 0.0329 | 0.9944 | 30.1940 | 0.0494 | 92.3916 |
| SmallVesselStroke | g_Citrobacter     | MR Egger                  | 21 | -0.1602 | 0.6315 | 0.8024 | 0.0265  | 0.0750 | 0.7274 | 18.0265 | 0.5207 | 21.0239 |
| SmallVesselStroke | g_Citrobacter     | Weighted median           | 21 | 0.0217  | 0.2374 | 0.9271 | 0.0265  | 0.0750 | 0.7274 | 18.0265 | 0.5207 | 21.0239 |
| SmallVesselStroke | g_Citrobacter     | Inverse variance weighted | 21 | 0.0556  | 0.1629 | 0.7329 | 0.0265  | 0.0750 | 0.7274 | 18.0265 | 0.5207 | 21.0239 |
| SmallVesselStroke | g_Citrobacter     | Simple mode               | 21 | -0.0008 | 0.4415 | 0.9985 | 0.0265  | 0.0750 | 0.7274 | 18.0265 | 0.5207 | 21.0239 |
| SmallVesselStroke | g_Citrobacter     | Weighted mode             | 21 | -0.0008 | 0.4603 | 0.9986 | 0.0265  | 0.0750 | 0.7274 | 18.0265 | 0.5207 | 21.0239 |
| SmallVesselStroke | g_Clostridium     | MR Egger                  | 21 | 0.1647  | 0.2163 | 0.4556 | -0.0196 | 0.0257 | 0.4542 | 15.6334 | 0.6816 | 91.3445 |
| SmallVesselStroke | g_Clostridium     | Weighted median           | 21 | -0.0145 | 0.0763 | 0.8490 | -0.0196 | 0.0257 | 0.4542 | 15.6334 | 0.6816 | 91.3445 |
| SmallVesselStroke | g_Clostridium     | Inverse variance weighted | 21 | 0.0051  | 0.0558 | 0.9275 | -0.0196 | 0.0257 | 0.4542 | 15.6334 | 0.6816 | 91.3445 |
| SmallVesselStroke | g_Clostridium     | Simple mode               | 21 | -0.0987 | 0.1531 | 0.5267 | -0.0196 | 0.0257 | 0.4542 | 15.6334 | 0.6816 | 91.3445 |
| SmallVesselStroke | g_Clostridium     | Weighted mode             | 21 | -0.0827 | 0.1493 | 0.5860 | -0.0196 | 0.0257 | 0.4542 | 15.6334 | 0.6816 | 91.3445 |
| SmallVesselStroke | g_Collinsella     | MR Egger                  | 21 | -0.4303 | 0.8167 | 0.6044 | 0.0550  | 0.0970 | 0.5773 | 27.2583 | 0.0988 | 2.1837  |

|                   |                    |                           |    |         |        |        |         |        |        |         |        |         |
|-------------------|--------------------|---------------------------|----|---------|--------|--------|---------|--------|--------|---------|--------|---------|
| SmallVesselStroke | g_Collinsella      | Weighted median           | 21 | -0.0702 | 0.2605 | 0.7876 | 0.0550  | 0.0970 | 0.5773 | 27.2583 | 0.0988 | 2.1837  |
| SmallVesselStroke | g_Collinsella      | Inverse variance weighted | 21 | 0.0172  | 0.2071 | 0.9338 | 0.0550  | 0.0970 | 0.5773 | 27.2583 | 0.0988 | 2.1837  |
| SmallVesselStroke | g_Collinsella      | Simple mode               | 21 | -0.2309 | 0.4947 | 0.6457 | 0.0550  | 0.0970 | 0.5773 | 27.2583 | 0.0988 | 2.1837  |
| SmallVesselStroke | g_Collinsella      | Weighted mode             | 21 | -0.1276 | 0.4521 | 0.7807 | 0.0550  | 0.0970 | 0.5773 | 27.2583 | 0.0988 | 2.1837  |
| SmallVesselStroke | g_Coprobacillus    | MR Egger                  | 21 | -0.0703 | 0.3397 | 0.8382 | 0.0034  | 0.0404 | 0.9329 | 18.3434 | 0.4996 | 70.5535 |
| SmallVesselStroke | g_Coprobacillus    | Weighted median           | 21 | -0.1357 | 0.1211 | 0.2624 | 0.0034  | 0.0404 | 0.9329 | 18.3434 | 0.4996 | 70.5535 |
| SmallVesselStroke | g_Coprobacillus    | Inverse variance weighted | 21 | -0.0423 | 0.0877 | 0.6293 | 0.0034  | 0.0404 | 0.9329 | 18.3434 | 0.4996 | 70.5535 |
| SmallVesselStroke | g_Coprobacillus    | Simple mode               | 21 | -0.2149 | 0.2397 | 0.3807 | 0.0034  | 0.0404 | 0.9329 | 18.3434 | 0.4996 | 70.5535 |
| SmallVesselStroke | g_Coprobacillus    | Weighted mode             | 21 | -0.2149 | 0.2039 | 0.3046 | 0.0034  | 0.0404 | 0.9329 | 18.3434 | 0.4996 | 70.5535 |
| SmallVesselStroke | g_Coprococcus      | MR Egger                  | 21 | 0.1770  | 0.3335 | 0.6017 | -0.0149 | 0.0396 | 0.7110 | 23.1811 | 0.2295 | 59.6595 |
| SmallVesselStroke | g_Coprococcus      | Weighted median           | 21 | 0.1150  | 0.1150 | 0.3173 | -0.0149 | 0.0396 | 0.7110 | 23.1811 | 0.2295 | 59.6595 |
| SmallVesselStroke | g_Coprococcus      | Inverse variance weighted | 21 | 0.0558  | 0.0842 | 0.5071 | -0.0149 | 0.0396 | 0.7110 | 23.1811 | 0.2295 | 59.6595 |
| SmallVesselStroke | g_Coprococcus      | Simple mode               | 21 | 0.1265  | 0.2132 | 0.5597 | -0.0149 | 0.0396 | 0.7110 | 23.1811 | 0.2295 | 59.6595 |
| SmallVesselStroke | g_Coprococcus      | Weighted mode             | 21 | 0.1104  | 0.1955 | 0.5786 | -0.0149 | 0.0396 | 0.7110 | 23.1811 | 0.2295 | 59.6595 |
| SmallVesselStroke | g_Desulfovibrio    | MR Egger                  | 21 | 0.3071  | 0.9784 | 0.7570 | -0.0434 | 0.1162 | 0.7132 | 30.4897 | 0.0459 | 2.2555  |
| SmallVesselStroke | g_Desulfovibrio    | Weighted median           | 21 | -0.3587 | 0.2875 | 0.2122 | -0.0434 | 0.1162 | 0.7132 | 30.4897 | 0.0459 | 2.2555  |
| SmallVesselStroke | g_Desulfovibrio    | Inverse variance weighted | 21 | -0.0455 | 0.2470 | 0.8538 | -0.0434 | 0.1162 | 0.7132 | 30.4897 | 0.0459 | 2.2555  |
| SmallVesselStroke | g_Desulfovibrio    | Simple mode               | 21 | -0.3917 | 0.5277 | 0.4665 | -0.0434 | 0.1162 | 0.7132 | 30.4897 | 0.0459 | 2.2555  |
| SmallVesselStroke | g_Desulfovibrio    | Weighted mode             | 21 | -0.4840 | 0.5202 | 0.3633 | -0.0434 | 0.1162 | 0.7132 | 30.4897 | 0.0459 | 2.2555  |
| SmallVesselStroke | g_Dorea            | MR Egger                  | 21 | -0.4163 | 0.3055 | 0.1889 | 0.0476  | 0.0363 | 0.2050 | 29.1917 | 0.0841 | 26.7884 |
| SmallVesselStroke | g_Dorea            | Weighted median           | 21 | -0.0527 | 0.0988 | 0.5935 | 0.0476  | 0.0363 | 0.2050 | 29.1917 | 0.0841 | 26.7884 |
| SmallVesselStroke | g_Dorea            | Inverse variance weighted | 21 | -0.0290 | 0.0803 | 0.7182 | 0.0476  | 0.0363 | 0.2050 | 29.1917 | 0.0841 | 26.7884 |
| SmallVesselStroke | g_Dorea            | Simple mode               | 21 | -0.1050 | 0.1732 | 0.5511 | 0.0476  | 0.0363 | 0.2050 | 29.1917 | 0.0841 | 26.7884 |
| SmallVesselStroke | g_Dorea            | Weighted mode             | 21 | -0.1348 | 0.1495 | 0.3780 | 0.0476  | 0.0363 | 0.2050 | 29.1917 | 0.0841 | 26.7884 |
| SmallVesselStroke | g_Enterobacter     | MR Egger                  | 21 | 0.0287  | 0.7501 | 0.9698 | 0.0032  | 0.0891 | 0.9716 | 22.0650 | 0.2810 | 8.9204  |
| SmallVesselStroke | g_Enterobacter     | Weighted median           | 21 | -0.0204 | 0.2588 | 0.9373 | 0.0032  | 0.0891 | 0.9716 | 22.0650 | 0.2810 | 8.9204  |
| SmallVesselStroke | g_Enterobacter     | Inverse variance weighted | 21 | 0.0549  | 0.1886 | 0.7710 | 0.0032  | 0.0891 | 0.9716 | 22.0650 | 0.2810 | 8.9204  |
| SmallVesselStroke | g_Enterobacter     | Simple mode               | 21 | -0.2942 | 0.5315 | 0.5860 | 0.0032  | 0.0891 | 0.9716 | 22.0650 | 0.2810 | 8.9204  |
| SmallVesselStroke | g_Enterobacter     | Weighted mode             | 21 | -0.1796 | 0.5000 | 0.7233 | 0.0032  | 0.0891 | 0.9716 | 22.0650 | 0.2810 | 8.9204  |
| SmallVesselStroke | g_Escherichia      | MR Egger                  | 21 | -0.2404 | 0.5845 | 0.6855 | 0.0197  | 0.0694 | 0.7798 | 22.7051 | 0.2506 | 13.9748 |
| SmallVesselStroke | g_Escherichia      | Weighted median           | 21 | 0.0095  | 0.1940 | 0.9610 | 0.0197  | 0.0694 | 0.7798 | 22.7051 | 0.2506 | 13.9748 |
| SmallVesselStroke | g_Escherichia      | Inverse variance weighted | 21 | -0.0802 | 0.1473 | 0.5860 | 0.0197  | 0.0694 | 0.7798 | 22.7051 | 0.2506 | 13.9748 |
| SmallVesselStroke | g_Escherichia      | Simple mode               | 21 | -0.1998 | 0.3659 | 0.5911 | 0.0197  | 0.0694 | 0.7798 | 22.7051 | 0.2506 | 13.9748 |
| SmallVesselStroke | g_Escherichia      | Weighted mode             | 21 | -0.1446 | 0.3403 | 0.6755 | 0.0197  | 0.0694 | 0.7798 | 22.7051 | 0.2506 | 13.9748 |
| SmallVesselStroke | g_Faecalibacterium | MR Egger                  | 21 | 0.5056  | 0.4705 | 0.2960 | -0.0542 | 0.0559 | 0.3446 | 28.2493 | 0.1036 | 18.2495 |
| SmallVesselStroke | g_Faecalibacterium | Weighted median           | 21 | 0.0060  | 0.1505 | 0.9682 | -0.0542 | 0.0559 | 0.3446 | 28.2493 | 0.1036 | 18.2495 |
| SmallVesselStroke | g_Faecalibacterium | Inverse variance weighted | 21 | 0.0650  | 0.1212 | 0.5919 | -0.0542 | 0.0559 | 0.3446 | 28.2493 | 0.1036 | 18.2495 |
| SmallVesselStroke | g_Faecalibacterium | Simple mode               | 21 | -0.1872 | 0.2958 | 0.5340 | -0.0542 | 0.0559 | 0.3446 | 28.2493 | 0.1036 | 18.2495 |
| SmallVesselStroke | g_Faecalibacterium | Weighted mode             | 21 | -0.1736 | 0.2527 | 0.5000 | -0.0542 | 0.0559 | 0.3446 | 28.2493 | 0.1036 | 18.2495 |
| SmallVesselStroke | g_Fusobacterium    | MR Egger                  | 21 | -0.4643 | 0.9966 | 0.6466 | 0.0699  | 0.1184 | 0.5620 | 25.0080 | 0.1603 | 1.1245  |
| SmallVesselStroke | g_Fusobacterium    | Weighted median           | 21 | 0.0071  | 0.3367 | 0.9831 | 0.0699  | 0.1184 | 0.5620 | 25.0080 | 0.1603 | 1.1245  |
| SmallVesselStroke | g_Fusobacterium    | Inverse variance weighted | 21 | 0.1040  | 0.2529 | 0.6809 | 0.0699  | 0.1184 | 0.5620 | 25.0080 | 0.1603 | 1.1245  |
| SmallVesselStroke | g_Fusobacterium    | Simple mode               | 21 | -0.0835 | 0.5789 | 0.8867 | 0.0699  | 0.1184 | 0.5620 | 25.0080 | 0.1603 | 1.1245  |
| SmallVesselStroke | g_Fusobacterium    | Weighted mode             | 21 | -0.1955 | 0.5591 | 0.7303 | 0.0699  | 0.1184 | 0.5620 | 25.0080 | 0.1603 | 1.1245  |
| SmallVesselStroke | g_Gemella          | MR Egger                  | 21 | 0.1074  | 0.3663 | 0.7726 | -0.0114 | 0.0435 | 0.7964 | 20.9509 | 0.3395 | 30.8079 |
| SmallVesselStroke | g_Gemella          | Weighted median           | 21 | 0.1276  | 0.1243 | 0.3046 | -0.0114 | 0.0435 | 0.7964 | 20.9509 | 0.3395 | 30.8079 |
| SmallVesselStroke | g_Gemella          | Inverse variance weighted | 21 | 0.0148  | 0.0923 | 0.8727 | -0.0114 | 0.0435 | 0.7964 | 20.9509 | 0.3395 | 30.8079 |
| SmallVesselStroke | g_Gemella          | Simple mode               | 21 | 0.1545  | 0.2547 | 0.5508 | -0.0114 | 0.0435 | 0.7964 | 20.9509 | 0.3395 | 30.8079 |
| SmallVesselStroke | g_Gemella          | Weighted mode             | 21 | 0.1491  | 0.2482 | 0.5548 | -0.0114 | 0.0435 | 0.7964 | 20.9509 | 0.3395 | 30.8079 |
| SmallVesselStroke | g_Granulicatella   | MR Egger                  | 21 | 0.2528  | 0.3384 | 0.4642 | -0.0233 | 0.0402 | 0.5694 | 23.1859 | 0.2293 | 17.3580 |
| SmallVesselStroke | g_Granulicatella   | Weighted median           | 21 | 0.0824  | 0.1146 | 0.4719 | -0.0233 | 0.0402 | 0.5694 | 23.1859 | 0.2293 | 17.3580 |
| SmallVesselStroke | g_Granulicatella   | Inverse variance weighted | 21 | 0.0635  | 0.0859 | 0.4597 | -0.0233 | 0.0402 | 0.5694 | 23.1859 | 0.2293 | 17.3580 |
| SmallVesselStroke | g_Granulicatella   | Simple mode               | 21 | 0.0774  | 0.1963 | 0.6974 | -0.0233 | 0.0402 | 0.5694 | 23.1859 | 0.2293 | 17.3580 |
| SmallVesselStroke | g_Granulicatella   | Weighted mode             | 21 | 0.0873  | 0.1803 | 0.6336 | -0.0233 | 0.0402 | 0.5694 | 23.1859 | 0.2293 | 17.3580 |
| SmallVesselStroke | g_Holdemania       | MR Egger                  | 21 | 0.0494  | 0.2665 | 0.8550 | -0.0004 | 0.0317 | 0.9901 | 15.0316 | 0.7206 | 69.6515 |
| SmallVesselStroke | g_Holdemania       | Weighted median           | 21 | 0.0464  | 0.0896 | 0.6045 | -0.0004 | 0.0317 | 0.9901 | 15.0316 | 0.7206 | 69.6515 |
| SmallVesselStroke | g_Holdemania       | Inverse variance weighted | 21 | 0.0461  | 0.0688 | 0.5023 | -0.0004 | 0.0317 | 0.9901 | 15.0316 | 0.7206 | 69.6515 |
| SmallVesselStroke | g_Holdemania       | Simple mode               | 21 | 0.0595  | 0.1649 | 0.7218 | -0.0004 | 0.0317 | 0.9901 | 15.0316 | 0.7206 | 69.6515 |
| SmallVesselStroke | g_Holdemania       | Weighted mode             | 21 | 0.0677  | 0.1526 | 0.6623 | -0.0004 | 0.0317 | 0.9901 | 15.0316 | 0.7206 | 69.6515 |
| SmallVesselStroke | g_Klebsiella       | MR Egger                  | 21 | 0.1151  | 0.7298 | 0.8763 | -0.0061 | 0.0867 | 0.9444 | 15.7605 | 0.6732 | 10.1551 |
| SmallVesselStroke | g_Klebsiella       | Weighted median           | 21 | 0.2737  | 0.2576 | 0.2881 | -0.0061 | 0.0867 | 0.9444 | 15.7605 | 0.6732 | 10.1551 |

|                   |                   |                           |    |         |        |        |         |        |        |         |        |         |
|-------------------|-------------------|---------------------------|----|---------|--------|--------|---------|--------|--------|---------|--------|---------|
| SmallVesselStroke | g_Klebsiella      | Inverse variance weighted | 21 | 0.0653  | 0.1883 | 0.7287 | -0.0061 | 0.0867 | 0.9444 | 15.7605 | 0.6732 | 10.1551 |
| SmallVesselStroke | g_Klebsiella      | Simple mode               | 21 | 0.3323  | 0.4886 | 0.5042 | -0.0061 | 0.0867 | 0.9444 | 15.7605 | 0.6732 | 10.1551 |
| SmallVesselStroke | g_Klebsiella      | Weighted mode             | 21 | 0.3427  | 0.4704 | 0.4747 | -0.0061 | 0.0867 | 0.9444 | 15.7605 | 0.6732 | 10.1551 |
| SmallVesselStroke | g_Lactococcus     | MR Egger                  | 21 | -1.0437 | 0.4348 | 0.0268 | 0.1231  | 0.0517 | 0.0278 | 22.6750 | 0.3050 | 21.5385 |
| SmallVesselStroke | g_Lactococcus     | Weighted median           | 21 | -0.0899 | 0.1674 | 0.5914 | 0.1231  | 0.0517 | 0.0278 | 22.6750 | 0.3050 | 21.5385 |
| SmallVesselStroke | g_Lactococcus     | Inverse variance weighted | 21 | -0.0429 | 0.1195 | 0.7197 | 0.1231  | 0.0517 | 0.0278 | 22.6750 | 0.3050 | 21.5385 |
| SmallVesselStroke | g_Lactococcus     | Simple mode               | 21 | -0.0896 | 0.3218 | 0.7836 | 0.1231  | 0.0517 | 0.0278 | 22.6750 | 0.3050 | 21.5385 |
| SmallVesselStroke | g_Lactococcus     | Weighted mode             | 21 | -0.1029 | 0.3166 | 0.7487 | 0.1231  | 0.0517 | 0.0278 | 22.6750 | 0.3050 | 21.5385 |
| SmallVesselStroke | g_Megasphaera     | MR Egger                  | 21 | -0.2675 | 0.5260 | 0.6169 | 0.0758  | 0.0625 | 0.2399 | 11.6015 | 0.9291 | 19.9649 |
| SmallVesselStroke | g_Megasphaera     | Weighted median           | 21 | 0.3269  | 0.1899 | 0.0852 | 0.0758  | 0.0625 | 0.2399 | 11.6015 | 0.9291 | 19.9649 |
| SmallVesselStroke | g_Megasphaera     | Inverse variance weighted | 21 | 0.3490  | 0.1357 | 0.0101 | 0.0758  | 0.0625 | 0.2399 | 11.6015 | 0.9291 | 19.9649 |
| SmallVesselStroke | g_Megasphaera     | Simple mode               | 21 | 0.5298  | 0.3470 | 0.1424 | 0.0758  | 0.0625 | 0.2399 | 11.6015 | 0.9291 | 19.9649 |
| SmallVesselStroke | g_Megasphaera     | Weighted mode             | 21 | 0.3676  | 0.3424 | 0.2959 | 0.0758  | 0.0625 | 0.2399 | 11.6015 | 0.9291 | 19.9649 |
| SmallVesselStroke | g_Mitsuokella     | MR Egger                  | 21 | -0.1772 | 0.6773 | 0.7964 | 0.0517  | 0.0805 | 0.5280 | 27.2168 | 0.0997 | 14.7506 |
| SmallVesselStroke | g_Mitsuokella     | Weighted median           | 21 | 0.2534  | 0.2138 | 0.2360 | 0.0517  | 0.0805 | 0.5280 | 27.2168 | 0.0997 | 14.7506 |
| SmallVesselStroke | g_Mitsuokella     | Inverse variance weighted | 21 | 0.2435  | 0.1722 | 0.1573 | 0.0517  | 0.0805 | 0.5280 | 27.2168 | 0.0997 | 14.7506 |
| SmallVesselStroke | g_Mitsuokella     | Simple mode               | 21 | 0.4532  | 0.4031 | 0.2742 | 0.0517  | 0.0805 | 0.5280 | 27.2168 | 0.0997 | 14.7506 |
| SmallVesselStroke | g_Mitsuokella     | Weighted mode             | 21 | 0.4092  | 0.3893 | 0.3057 | 0.0517  | 0.0805 | 0.5280 | 27.2168 | 0.0997 | 14.7506 |
| SmallVesselStroke | g_Mobiluncus      | MR Egger                  | 21 | -0.2663 | 0.3554 | 0.4629 | 0.0280  | 0.0422 | 0.5145 | 15.1493 | 0.7131 | 21.7012 |
| SmallVesselStroke | g_Mobiluncus      | Weighted median           | 21 | 0.0072  | 0.1264 | 0.9548 | 0.0280  | 0.0422 | 0.5145 | 15.1493 | 0.7131 | 21.7012 |
| SmallVesselStroke | g_Mobiluncus      | Inverse variance weighted | 21 | -0.0382 | 0.0917 | 0.6772 | 0.0280  | 0.0422 | 0.5145 | 15.1493 | 0.7131 | 21.7012 |
| SmallVesselStroke | g_Mobiluncus      | Simple mode               | 21 | 0.0214  | 0.2401 | 0.9300 | 0.0280  | 0.0422 | 0.5145 | 15.1493 | 0.7131 | 21.7012 |
| SmallVesselStroke | g_Mobiluncus      | Weighted mode             | 21 | 0.0214  | 0.2095 | 0.9198 | 0.0280  | 0.0422 | 0.5145 | 15.1493 | 0.7131 | 21.7012 |
| SmallVesselStroke | g_Odoribacter     | MR Egger                  | 21 | 0.3085  | 0.4055 | 0.4562 | -0.0227 | 0.0482 | 0.6422 | 16.2417 | 0.6411 | 39.2714 |
| SmallVesselStroke | g_Odoribacter     | Weighted median           | 21 | 0.0076  | 0.1509 | 0.9598 | -0.0227 | 0.0482 | 0.6422 | 16.2417 | 0.6411 | 39.2714 |
| SmallVesselStroke | g_Odoribacter     | Inverse variance weighted | 21 | 0.1235  | 0.1046 | 0.2379 | -0.0227 | 0.0482 | 0.6422 | 16.2417 | 0.6411 | 39.2714 |
| SmallVesselStroke | g_Odoribacter     | Simple mode               | 21 | -0.1635 | 0.2957 | 0.5865 | -0.0227 | 0.0482 | 0.6422 | 16.2417 | 0.6411 | 39.2714 |
| SmallVesselStroke | g_Odoribacter     | Weighted mode             | 21 | -0.1856 | 0.2865 | 0.5245 | -0.0227 | 0.0482 | 0.6422 | 16.2417 | 0.6411 | 39.2714 |
| SmallVesselStroke | g_Oribacterium    | MR Egger                  | 21 | -0.2178 | 0.2769 | 0.4413 | 0.0236  | 0.0329 | 0.4821 | 22.3024 | 0.2695 | 79.6351 |
| SmallVesselStroke | g_Oribacterium    | Weighted median           | 21 | -0.0141 | 0.0910 | 0.8766 | 0.0236  | 0.0329 | 0.4821 | 22.3024 | 0.2695 | 79.6351 |
| SmallVesselStroke | g_Oribacterium    | Inverse variance weighted | 21 | -0.0260 | 0.0706 | 0.7126 | 0.0236  | 0.0329 | 0.4821 | 22.3024 | 0.2695 | 79.6351 |
| SmallVesselStroke | g_Oribacterium    | Simple mode               | 21 | 0.0589  | 0.1823 | 0.7500 | 0.0236  | 0.0329 | 0.4821 | 22.3024 | 0.2695 | 79.6351 |
| SmallVesselStroke | g_Oribacterium    | Weighted mode             | 21 | 0.0290  | 0.1634 | 0.8610 | 0.0236  | 0.0329 | 0.4821 | 22.3024 | 0.2695 | 79.6351 |
| SmallVesselStroke | g_Oscillibacter   | MR Egger                  | 21 | -0.0552 | 0.4375 | 0.9009 | 0.0082  | 0.0520 | 0.8763 | 16.5718 | 0.6189 | 33.7722 |
| SmallVesselStroke | g_Oscillibacter   | Weighted median           | 21 | -0.1107 | 0.1526 | 0.4684 | 0.0082  | 0.0520 | 0.8763 | 16.5718 | 0.6189 | 33.7722 |
| SmallVesselStroke | g_Oscillibacter   | Inverse variance weighted | 21 | 0.0115  | 0.1129 | 0.9188 | 0.0082  | 0.0520 | 0.8763 | 16.5718 | 0.6189 | 33.7722 |
| SmallVesselStroke | g_Oscillibacter   | Simple mode               | 21 | -0.1766 | 0.2912 | 0.5510 | 0.0082  | 0.0520 | 0.8763 | 16.5718 | 0.6189 | 33.7722 |
| SmallVesselStroke | g_Oscillibacter   | Weighted mode             | 21 | -0.1874 | 0.2693 | 0.4946 | 0.0082  | 0.0520 | 0.8763 | 16.5718 | 0.6189 | 33.7722 |
| SmallVesselStroke | g_Oxalobacter     | MR Egger                  | 21 | 0.4740  | 0.7661 | 0.5435 | -0.0457 | 0.0910 | 0.6215 | 25.9667 | 0.1311 | 3.4534  |
| SmallVesselStroke | g_Oxalobacter     | Weighted median           | 21 | -0.0549 | 0.2503 | 0.8262 | -0.0457 | 0.0910 | 0.6215 | 25.9667 | 0.1311 | 3.4534  |
| SmallVesselStroke | g_Oxalobacter     | Inverse variance weighted | 21 | 0.1025  | 0.1940 | 0.5971 | -0.0457 | 0.0910 | 0.6215 | 25.9667 | 0.1311 | 3.4534  |
| SmallVesselStroke | g_Oxalobacter     | Simple mode               | 21 | -0.3370 | 0.5014 | 0.5093 | -0.0457 | 0.0910 | 0.6215 | 25.9667 | 0.1311 | 3.4534  |
| SmallVesselStroke | g_Oxalobacter     | Weighted mode             | 21 | -0.1761 | 0.4455 | 0.6968 | -0.0457 | 0.0910 | 0.6215 | 25.9667 | 0.1311 | 3.4534  |
| SmallVesselStroke | g_Parabacteroides | MR Egger                  | 21 | 0.1851  | 0.2524 | 0.4724 | -0.0151 | 0.0300 | 0.6211 | 20.6495 | 0.3565 | 88.9748 |
| SmallVesselStroke | g_Parabacteroides | Weighted median           | 21 | 0.1146  | 0.0909 | 0.2074 | -0.0151 | 0.0300 | 0.6211 | 20.6495 | 0.3565 | 88.9748 |
| SmallVesselStroke | g_Parabacteroides | Inverse variance weighted | 21 | 0.0625  | 0.0639 | 0.3278 | -0.0151 | 0.0300 | 0.6211 | 20.6495 | 0.3565 | 88.9748 |
| SmallVesselStroke | g_Parabacteroides | Simple mode               | 21 | 0.1259  | 0.1548 | 0.4257 | -0.0151 | 0.0300 | 0.6211 | 20.6495 | 0.3565 | 88.9748 |
| SmallVesselStroke | g_Parabacteroides | Weighted mode             | 21 | 0.1600  | 0.1548 | 0.3137 | -0.0151 | 0.0300 | 0.6211 | 20.6495 | 0.3565 | 88.9748 |
| SmallVesselStroke | g_Paraprevotella  | MR Egger                  | 21 | -0.5713 | 0.3862 | 0.1554 | 0.0775  | 0.0459 | 0.1077 | 20.3568 | 0.4358 | 8.7784  |
| SmallVesselStroke | g_Paraprevotella  | Weighted median           | 21 | 0.1080  | 0.1421 | 0.4470 | 0.0775  | 0.0459 | 0.1077 | 20.3568 | 0.4358 | 8.7784  |
| SmallVesselStroke | g_Paraprevotella  | Inverse variance weighted | 21 | 0.0586  | 0.1006 | 0.5604 | 0.0775  | 0.0459 | 0.1077 | 20.3568 | 0.4358 | 8.7784  |
| SmallVesselStroke | g_Paraprevotella  | Simple mode               | 21 | 0.0374  | 0.2445 | 0.8799 | 0.0775  | 0.0459 | 0.1077 | 20.3568 | 0.4358 | 8.7784  |
| SmallVesselStroke | g_Paraprevotella  | Weighted mode             | 21 | -0.0023 | 0.2536 | 0.9928 | 0.0775  | 0.0459 | 0.1077 | 20.3568 | 0.4358 | 8.7784  |
| SmallVesselStroke | g_Parasutterella  | MR Egger                  | 21 | -0.5007 | 0.9036 | 0.5860 | 0.0347  | 0.1074 | 0.7499 | 20.8055 | 0.3476 | 1.5732  |
| SmallVesselStroke | g_Parasutterella  | Weighted median           | 21 | -0.0785 | 0.3309 | 0.8124 | 0.0347  | 0.1074 | 0.7499 | 20.8055 | 0.3476 | 1.5732  |
| SmallVesselStroke | g_Parasutterella  | Inverse variance weighted | 21 | -0.2184 | 0.2279 | 0.3379 | 0.0347  | 0.1074 | 0.7499 | 20.8055 | 0.3476 | 1.5732  |
| SmallVesselStroke | g_Parasutterella  | Simple mode               | 21 | 0.3832  | 0.6949 | 0.5875 | 0.0347  | 0.1074 | 0.7499 | 20.8055 | 0.3476 | 1.5732  |
| SmallVesselStroke | g_Parasutterella  | Weighted mode             | 21 | 0.3959  | 0.6283 | 0.5357 | 0.0347  | 0.1074 | 0.7499 | 20.8055 | 0.3476 | 1.5732  |
| SmallVesselStroke | g_Peptoniphilus   | MR Egger                  | 21 | -0.5644 | 0.4748 | 0.2492 | 0.0443  | 0.0564 | 0.4416 | 18.1252 | 0.5141 | 22.4366 |
| SmallVesselStroke | g_Peptoniphilus   | Weighted median           | 21 | -0.2510 | 0.1704 | 0.1408 | 0.0443  | 0.0564 | 0.4416 | 18.1252 | 0.5141 | 22.4366 |
| SmallVesselStroke | g_Peptoniphilus   | Inverse variance weighted | 21 | -0.2039 | 0.1225 | 0.0961 | 0.0443  | 0.0564 | 0.4416 | 18.1252 | 0.5141 | 22.4366 |

|                   |                        |                           |    |         |        |        |         |        |        |         |        |         |
|-------------------|------------------------|---------------------------|----|---------|--------|--------|---------|--------|--------|---------|--------|---------|
| SmallVesselStroke | g_Peptoniphilus        | Simple mode               | 21 | -0.3842 | 0.3093 | 0.2285 | 0.0443  | 0.0564 | 0.4416 | 18.1252 | 0.5141 | 22.4366 |
| SmallVesselStroke | g_Peptoniphilus        | Weighted mode             | 21 | -0.3842 | 0.2773 | 0.1811 | 0.0443  | 0.0564 | 0.4416 | 18.1252 | 0.5141 | 22.4366 |
| SmallVesselStroke | g_Phascolartobacterium | MR Egger                  | 21 | -1.1719 | 0.5218 | 0.0368 | 0.1222  | 0.0620 | 0.0634 | 21.7428 | 0.3546 | 1.6473  |
| SmallVesselStroke | g_Phascolartobacterium | Weighted median           | 21 | -0.1370 | 0.1907 | 0.4726 | 0.1222  | 0.0620 | 0.0634 | 21.7428 | 0.3546 | 1.6473  |
| SmallVesselStroke | g_Phascolartobacterium | Inverse variance weighted | 21 | -0.1780 | 0.1404 | 0.2050 | 0.1222  | 0.0620 | 0.0634 | 21.7428 | 0.3546 | 1.6473  |
| SmallVesselStroke | g_Phascolartobacterium | Simple mode               | 21 | -0.0144 | 0.3681 | 0.9692 | 0.1222  | 0.0620 | 0.0634 | 21.7428 | 0.3546 | 1.6473  |
| SmallVesselStroke | g_Phascolartobacterium | Weighted mode             | 21 | -0.0889 | 0.3175 | 0.7825 | 0.1222  | 0.0620 | 0.0634 | 21.7428 | 0.3546 | 1.6473  |
| SmallVesselStroke | g_Porphyromonas        | MR Egger                  | 21 | -0.5002 | 0.5907 | 0.4077 | 0.0377  | 0.0702 | 0.5970 | 11.6453 | 0.9002 | 23.1819 |
| SmallVesselStroke | g_Porphyromonas        | Weighted median           | 21 | -0.0950 | 0.2014 | 0.6370 | 0.0377  | 0.0702 | 0.5970 | 11.6453 | 0.9002 | 23.1819 |
| SmallVesselStroke | g_Porphyromonas        | Inverse variance weighted | 21 | -0.1933 | 0.1524 | 0.2047 | 0.0377  | 0.0702 | 0.5970 | 11.6453 | 0.9002 | 23.1819 |
| SmallVesselStroke | g_Porphyromonas        | Simple mode               | 21 | 0.2773  | 0.3709 | 0.4634 | 0.0377  | 0.0702 | 0.5970 | 11.6453 | 0.9002 | 23.1819 |
| SmallVesselStroke | g_Porphyromonas        | Weighted mode             | 21 | 0.2646  | 0.3590 | 0.4696 | 0.0377  | 0.0702 | 0.5970 | 11.6453 | 0.9002 | 23.1819 |
| SmallVesselStroke | g_Providencia          | MR Egger                  | 21 | 0.1799  | 0.5762 | 0.7583 | -0.0223 | 0.0684 | 0.7479 | 16.7491 | 0.6069 | 15.4451 |
| SmallVesselStroke | g_Providencia          | Weighted median           | 21 | 0.0565  | 0.2044 | 0.7821 | -0.0223 | 0.0684 | 0.7479 | 16.7491 | 0.6069 | 15.4451 |
| SmallVesselStroke | g_Providencia          | Inverse variance weighted | 21 | -0.0017 | 0.1487 | 0.9909 | -0.0223 | 0.0684 | 0.7479 | 16.7491 | 0.6069 | 15.4451 |
| SmallVesselStroke | g_Providencia          | Simple mode               | 21 | 0.1480  | 0.3809 | 0.7017 | -0.0223 | 0.0684 | 0.7479 | 16.7491 | 0.6069 | 15.4451 |
| SmallVesselStroke | g_Providencia          | Weighted mode             | 21 | 0.2040  | 0.3349 | 0.5493 | -0.0223 | 0.0684 | 0.7479 | 16.7491 | 0.6069 | 15.4451 |
| SmallVesselStroke | g_Pseudoflavonifractor | MR Egger                  | 21 | -0.1076 | 0.2400 | 0.6590 | 0.0022  | 0.0285 | 0.9388 | 21.0965 | 0.3315 | 96.8223 |
| SmallVesselStroke | g_Pseudoflavonifractor | Weighted median           | 21 | -0.0347 | 0.0823 | 0.6732 | 0.0022  | 0.0285 | 0.9388 | 21.0965 | 0.3315 | 96.8223 |
| SmallVesselStroke | g_Pseudoflavonifractor | Inverse variance weighted | 21 | -0.0895 | 0.0604 | 0.1381 | 0.0022  | 0.0285 | 0.9388 | 21.0965 | 0.3315 | 96.8223 |
| SmallVesselStroke | g_Pseudoflavonifractor | Simple mode               | 21 | 0.0273  | 0.1455 | 0.8533 | 0.0022  | 0.0285 | 0.9388 | 21.0965 | 0.3315 | 96.8223 |
| SmallVesselStroke | g_Pseudoflavonifractor | Weighted mode             | 21 | 0.0232  | 0.1349 | 0.8653 | 0.0022  | 0.0285 | 0.9388 | 21.0965 | 0.3315 | 96.8223 |
| SmallVesselStroke | g_Roseburia            | MR Egger                  | 21 | -0.1431 | 0.3359 | 0.6749 | 0.0321  | 0.0399 | 0.4316 | 13.7792 | 0.7964 | 62.1640 |
| SmallVesselStroke | g_Roseburia            | Weighted median           | 21 | 0.1114  | 0.1163 | 0.3380 | 0.0321  | 0.0399 | 0.4316 | 13.7792 | 0.7964 | 62.1640 |
| SmallVesselStroke | g_Roseburia            | Inverse variance weighted | 21 | 0.1177  | 0.0867 | 0.1746 | 0.0321  | 0.0399 | 0.4316 | 13.7792 | 0.7964 | 62.1640 |
| SmallVesselStroke | g_Roseburia            | Simple mode               | 21 | 0.1647  | 0.2024 | 0.4253 | 0.0321  | 0.0399 | 0.4316 | 13.7792 | 0.7964 | 62.1640 |
| SmallVesselStroke | g_Roseburia            | Weighted mode             | 21 | 0.1295  | 0.2001 | 0.5246 | 0.0321  | 0.0399 | 0.4316 | 13.7792 | 0.7964 | 62.1640 |
| SmallVesselStroke | g_Ruminococcus         | MR Egger                  | 21 | -0.1940 | 0.3796 | 0.6151 | 0.0165  | 0.0451 | 0.7190 | 33.4665 | 0.0212 | 4.7150  |
| SmallVesselStroke | g_Ruminococcus         | Weighted median           | 21 | -0.0469 | 0.1019 | 0.6453 | 0.0165  | 0.0451 | 0.7190 | 33.4665 | 0.0212 | 4.7150  |
| SmallVesselStroke | g_Ruminococcus         | Inverse variance weighted | 21 | -0.0601 | 0.0959 | 0.5305 | 0.0165  | 0.0451 | 0.7190 | 33.4665 | 0.0212 | 4.7150  |
| SmallVesselStroke | g_Ruminococcus         | Simple mode               | 21 | -0.0177 | 0.1840 | 0.9242 | 0.0165  | 0.0451 | 0.7190 | 33.4665 | 0.0212 | 4.7150  |
| SmallVesselStroke | g_Ruminococcus         | Weighted mode             | 21 | -0.0423 | 0.1693 | 0.8054 | 0.0165  | 0.0451 | 0.7190 | 33.4665 | 0.0212 | 4.7150  |
| SmallVesselStroke | g_Salmonella           | MR Egger                  | 21 | 0.3963  | 0.5639 | 0.4907 | -0.0347 | 0.0670 | 0.6107 | 19.4801 | 0.4264 | 10.9609 |
| SmallVesselStroke | g_Salmonella           | Weighted median           | 21 | -0.0072 | 0.2039 | 0.9717 | -0.0347 | 0.0670 | 0.6107 | 19.4801 | 0.4264 | 10.9609 |
| SmallVesselStroke | g_Salmonella           | Inverse variance weighted | 21 | 0.1143  | 0.1437 | 0.4262 | -0.0347 | 0.0670 | 0.6107 | 19.4801 | 0.4264 | 10.9609 |
| SmallVesselStroke | g_Salmonella           | Simple mode               | 21 | -0.1455 | 0.4316 | 0.7396 | -0.0347 | 0.0670 | 0.6107 | 19.4801 | 0.4264 | 10.9609 |
| SmallVesselStroke | g_Salmonella           | Weighted mode             | 21 | -0.1134 | 0.3934 | 0.7761 | -0.0347 | 0.0670 | 0.6107 | 19.4801 | 0.4264 | 10.9609 |
| SmallVesselStroke | g_Shuttleworthia       | MR Egger                  | 21 | -0.5947 | 0.5079 | 0.2562 | 0.0534  | 0.0603 | 0.3876 | 13.7409 | 0.7986 | 10.6023 |
| SmallVesselStroke | g_Shuttleworthia       | Weighted median           | 21 | -0.1354 | 0.1835 | 0.4606 | 0.0534  | 0.0603 | 0.3876 | 13.7409 | 0.7986 | 10.6023 |
| SmallVesselStroke | g_Shuttleworthia       | Inverse variance weighted | 21 | -0.1607 | 0.1311 | 0.2202 | 0.0534  | 0.0603 | 0.3876 | 13.7409 | 0.7986 | 10.6023 |
| SmallVesselStroke | g_Shuttleworthia       | Simple mode               | 21 | -0.1604 | 0.3281 | 0.6303 | 0.0534  | 0.0603 | 0.3876 | 13.7409 | 0.7986 | 10.6023 |
| SmallVesselStroke | g_Shuttleworthia       | Weighted mode             | 21 | -0.0950 | 0.3142 | 0.7655 | 0.0534  | 0.0603 | 0.3876 | 13.7409 | 0.7986 | 10.6023 |
| SmallVesselStroke | g_Solobacterium        | MR Egger                  | 21 | -0.0385 | 0.4100 | 0.9261 | 0.0089  | 0.0487 | 0.8566 | 18.4305 | 0.4939 | 60.4759 |
| SmallVesselStroke | g_Solobacterium        | Weighted median           | 21 | -0.0201 | 0.1496 | 0.8932 | 0.0089  | 0.0487 | 0.8566 | 18.4305 | 0.4939 | 60.4759 |
| SmallVesselStroke | g_Solobacterium        | Inverse variance weighted | 21 | 0.0341  | 0.1058 | 0.7475 | 0.0089  | 0.0487 | 0.8566 | 18.4305 | 0.4939 | 60.4759 |
| SmallVesselStroke | g_Solobacterium        | Simple mode               | 21 | 0.0312  | 0.2741 | 0.9105 | 0.0089  | 0.0487 | 0.8566 | 18.4305 | 0.4939 | 60.4759 |
| SmallVesselStroke | g_Solobacterium        | Weighted mode             | 21 | -0.0205 | 0.2535 | 0.9363 | 0.0089  | 0.0487 | 0.8566 | 18.4305 | 0.4939 | 60.4759 |
| SmallVesselStroke | g_Subdoligranulum      | MR Egger                  | 21 | 0.3235  | 0.3502 | 0.3672 | -0.0433 | 0.0416 | 0.3113 | 25.0793 | 0.1984 | 24.8230 |
| SmallVesselStroke | g_Subdoligranulum      | Weighted median           | 21 | -0.1108 | 0.1200 | 0.3560 | -0.0433 | 0.0416 | 0.3113 | 25.0793 | 0.1984 | 24.8230 |
| SmallVesselStroke | g_Subdoligranulum      | Inverse variance weighted | 21 | -0.0284 | 0.0906 | 0.7535 | -0.0433 | 0.0416 | 0.3113 | 25.0793 | 0.1984 | 24.8230 |
| SmallVesselStroke | g_Subdoligranulum      | Simple mode               | 21 | -0.1593 | 0.2164 | 0.4702 | -0.0433 | 0.0416 | 0.3113 | 25.0793 | 0.1984 | 24.8230 |
| SmallVesselStroke | g_Subdoligranulum      | Weighted mode             | 21 | -0.1487 | 0.2153 | 0.4978 | -0.0433 | 0.0416 | 0.3113 | 25.0793 | 0.1984 | 24.8230 |
| SmallVesselStroke | g_Sutterella           | MR Egger                  | 21 | -0.1778 | 0.8915 | 0.8441 | 0.0586  | 0.1059 | 0.5865 | 11.4857 | 0.9064 | 13.8953 |
| SmallVesselStroke | g_Sutterella           | Weighted median           | 21 | 0.1271  | 0.3144 | 0.6861 | 0.0586  | 0.1059 | 0.5865 | 11.4857 | 0.9064 | 13.8953 |
| SmallVesselStroke | g_Sutterella           | Inverse variance weighted | 21 | 0.2988  | 0.2300 | 0.1940 | 0.0586  | 0.1059 | 0.5865 | 11.4857 | 0.9064 | 13.8953 |
| SmallVesselStroke | g_Sutterella           | Simple mode               | 21 | 0.1640  | 0.5666 | 0.7752 | 0.0586  | 0.1059 | 0.5865 | 11.4857 | 0.9064 | 13.8953 |
| SmallVesselStroke | g_Sutterella           | Weighted mode             | 21 | 0.1525  | 0.5290 | 0.7761 | 0.0586  | 0.1059 | 0.5865 | 11.4857 | 0.9064 | 13.8953 |
| SmallVesselStroke | g_Tannerella           | MR Egger                  | 21 | 0.1751  | 0.5646 | 0.7598 | -0.0127 | 0.0671 | 0.8513 | 29.5108 | 0.0584 | 2.6112  |
| SmallVesselStroke | g_Tannerella           | Weighted median           | 21 | 0.1163  | 0.1579 | 0.4613 | -0.0127 | 0.0671 | 0.8513 | 29.5108 | 0.0584 | 2.6112  |
| SmallVesselStroke | g_Tannerella           | Inverse variance weighted | 21 | 0.0714  | 0.1422 | 0.6154 | -0.0127 | 0.0671 | 0.8513 | 29.5108 | 0.0584 | 2.6112  |
| SmallVesselStroke | g_Tannerella           | Simple mode               | 21 | 0.0975  | 0.2750 | 0.7267 | -0.0127 | 0.0671 | 0.8513 | 29.5108 | 0.0584 | 2.6112  |

|                   |                        |                           |    |         |        |        |         |        |        |         |        |         |
|-------------------|------------------------|---------------------------|----|---------|--------|--------|---------|--------|--------|---------|--------|---------|
| SmallVesselStroke | g_Tannerella           | Weighted mode             | 21 | 0.1161  | 0.2584 | 0.6581 | -0.0127 | 0.0671 | 0.8513 | 29.5108 | 0.0584 | 2.6112  |
| SmallVesselStroke | g_Treponema            | MR Egger                  | 21 | 0.0409  | 0.3280 | 0.9020 | 0.0000  | 0.0390 | 0.9998 | 16.2131 | 0.6430 | 69.9541 |
| SmallVesselStroke | g_Treponema            | Weighted median           | 21 | -0.0620 | 0.1151 | 0.5900 | 0.0000  | 0.0390 | 0.9998 | 16.2131 | 0.6430 | 69.9541 |
| SmallVesselStroke | g_Treponema            | Inverse variance weighted | 21 | 0.0409  | 0.0846 | 0.6294 | 0.0000  | 0.0390 | 0.9998 | 16.2131 | 0.6430 | 69.9541 |
| SmallVesselStroke | g_Treponema            | Simple mode               | 21 | -0.1885 | 0.2009 | 0.3593 | 0.0000  | 0.0390 | 0.9998 | 16.2131 | 0.6430 | 69.9541 |
| SmallVesselStroke | g_Treponema            | Weighted mode             | 21 | -0.1758 | 0.2016 | 0.3936 | 0.0000  | 0.0390 | 0.9998 | 16.2131 | 0.6430 | 69.9541 |
| SmallVesselStroke | g_Turicibacter         | MR Egger                  | 21 | -0.8767 | 0.7544 | 0.2596 | 0.1005  | 0.0896 | 0.2758 | 20.4227 | 0.4318 | 9.0587  |
| SmallVesselStroke | g_Turicibacter         | Weighted median           | 21 | -0.1046 | 0.2701 | 0.6985 | 0.1005  | 0.0896 | 0.2758 | 20.4227 | 0.4318 | 9.0587  |
| SmallVesselStroke | g_Turicibacter         | Inverse variance weighted | 21 | -0.0590 | 0.1959 | 0.7633 | 0.1005  | 0.0896 | 0.2758 | 20.4227 | 0.4318 | 9.0587  |
| SmallVesselStroke | g_Turicibacter         | Simple mode               | 21 | -0.0786 | 0.4743 | 0.8701 | 0.1005  | 0.0896 | 0.2758 | 20.4227 | 0.4318 | 9.0587  |
| SmallVesselStroke | g_Turicibacter         | Weighted mode             | 21 | -0.0893 | 0.4589 | 0.8476 | 0.1005  | 0.0896 | 0.2758 | 20.4227 | 0.4318 | 9.0587  |
| SmallVesselStroke | g_Veillonella          | MR Egger                  | 21 | -0.7671 | 0.6697 | 0.2662 | 0.1147  | 0.0796 | 0.1656 | 37.1843 | 0.0111 | 4.5711  |
| SmallVesselStroke | g_Veillonella          | Weighted median           | 21 | -0.0268 | 0.2080 | 0.8974 | 0.1147  | 0.0796 | 0.1656 | 37.1843 | 0.0111 | 4.5711  |
| SmallVesselStroke | g_Veillonella          | Inverse variance weighted | 21 | 0.1657  | 0.1774 | 0.3502 | 0.1147  | 0.0796 | 0.1656 | 37.1843 | 0.0111 | 4.5711  |
| SmallVesselStroke | g_Veillonella          | Simple mode               | 21 | 0.6683  | 0.4750 | 0.1748 | 0.1147  | 0.0796 | 0.1656 | 37.1843 | 0.0111 | 4.5711  |
| SmallVesselStroke | g_Veillonella          | Weighted mode             | 21 | 0.6683  | 0.4817 | 0.1806 | 0.1147  | 0.0796 | 0.1656 | 37.1843 | 0.0111 | 4.5711  |
| SmallVesselStroke | g_Vibrio               | MR Egger                  | 21 | 0.4315  | 0.6872 | 0.5375 | -0.0283 | 0.0816 | 0.7326 | 11.2190 | 0.9163 | 8.0402  |
| SmallVesselStroke | g_Vibrio               | Weighted median           | 21 | 0.3435  | 0.2406 | 0.1533 | -0.0283 | 0.0816 | 0.7326 | 11.2190 | 0.9163 | 8.0402  |
| SmallVesselStroke | g_Vibrio               | Inverse variance weighted | 21 | 0.2013  | 0.1773 | 0.2562 | -0.0283 | 0.0816 | 0.7326 | 11.2190 | 0.9163 | 8.0402  |
| SmallVesselStroke | g_Vibrio               | Simple mode               | 21 | 0.3698  | 0.4507 | 0.4217 | -0.0283 | 0.0816 | 0.7326 | 11.2190 | 0.9163 | 8.0402  |
| SmallVesselStroke | g_Vibrio               | Weighted mode             | 21 | 0.3946  | 0.4284 | 0.3680 | -0.0283 | 0.0816 | 0.7326 | 11.2190 | 0.9163 | 8.0402  |
| SmallVesselStroke | log_f_Aeromonadaceae   | MR Egger                  | 21 | -0.3017 | 0.7827 | 0.7041 | 0.0494  | 0.0929 | 0.6010 | 28.6111 | 0.0724 | 2.4824  |
| SmallVesselStroke | log_f_Aeromonadaceae   | Weighted median           | 21 | 0.3126  | 0.2542 | 0.2188 | 0.0494  | 0.0929 | 0.6010 | 28.6111 | 0.0724 | 2.4824  |
| SmallVesselStroke | log_f_Aeromonadaceae   | Inverse variance weighted | 21 | 0.1005  | 0.1979 | 0.6115 | 0.0494  | 0.0929 | 0.6010 | 28.6111 | 0.0724 | 2.4824  |
| SmallVesselStroke | log_f_Aeromonadaceae   | Simple mode               | 21 | 0.5482  | 0.5192 | 0.3036 | 0.0494  | 0.0929 | 0.6010 | 28.6111 | 0.0724 | 2.4824  |
| SmallVesselStroke | log_f_Aeromonadaceae   | Weighted mode             | 21 | 0.5034  | 0.4848 | 0.3115 | 0.0494  | 0.0929 | 0.6010 | 28.6111 | 0.0724 | 2.4824  |
| SmallVesselStroke | log_f_Alcaligenaceae   | MR Egger                  | 21 | -0.8555 | 0.6370 | 0.1951 | 0.0697  | 0.0756 | 0.3682 | 16.6999 | 0.6102 | 6.4293  |
| SmallVesselStroke | log_f_Alcaligenaceae   | Weighted median           | 21 | -0.2792 | 0.2266 | 0.2178 | 0.0697  | 0.0756 | 0.3682 | 16.6999 | 0.6102 | 6.4293  |
| SmallVesselStroke | log_f_Alcaligenaceae   | Inverse variance weighted | 21 | -0.2882 | 0.1642 | 0.0791 | 0.0697  | 0.0756 | 0.3682 | 16.6999 | 0.6102 | 6.4293  |
| SmallVesselStroke | log_f_Alcaligenaceae   | Simple mode               | 21 | -0.2989 | 0.4621 | 0.5251 | 0.0697  | 0.0756 | 0.3682 | 16.6999 | 0.6102 | 6.4293  |
| SmallVesselStroke | log_f_Alcaligenaceae   | Weighted mode             | 21 | -0.2540 | 0.4288 | 0.5602 | 0.0697  | 0.0756 | 0.3682 | 16.6999 | 0.6102 | 6.4293  |
| SmallVesselStroke | log_f_Brachyspiraceae  | MR Egger                  | 21 | 0.2146  | 0.6655 | 0.7506 | -0.0396 | 0.0790 | 0.6215 | 20.0903 | 0.3892 | 4.7280  |
| SmallVesselStroke | log_f_Brachyspiraceae  | Weighted median           | 21 | -0.0315 | 0.2266 | 0.8894 | -0.0396 | 0.0790 | 0.6215 | 20.0903 | 0.3892 | 4.7280  |
| SmallVesselStroke | log_f_Brachyspiraceae  | Inverse variance weighted | 21 | -0.1081 | 0.1681 | 0.5200 | -0.0396 | 0.0790 | 0.6215 | 20.0903 | 0.3892 | 4.7280  |
| SmallVesselStroke | log_f_Brachyspiraceae  | Simple mode               | 21 | 0.2831  | 0.4936 | 0.5727 | -0.0396 | 0.0790 | 0.6215 | 20.0903 | 0.3892 | 4.7280  |
| SmallVesselStroke | log_f_Brachyspiraceae  | Weighted mode             | 21 | 0.3033  | 0.4331 | 0.4917 | -0.0396 | 0.0790 | 0.6215 | 20.0903 | 0.3892 | 4.7280  |
| SmallVesselStroke | log_f_Comonadaceae     | MR Egger                  | 21 | 0.4744  | 0.6437 | 0.4701 | -0.0807 | 0.0764 | 0.3041 | 20.3666 | 0.4352 | 1.6844  |
| SmallVesselStroke | log_f_Comonadaceae     | Weighted median           | 21 | -0.2002 | 0.2429 | 0.4100 | -0.0807 | 0.0764 | 0.3041 | 20.3666 | 0.4352 | 1.6844  |
| SmallVesselStroke | log_f_Comonadaceae     | Inverse variance weighted | 21 | -0.1827 | 0.1658 | 0.2703 | -0.0807 | 0.0764 | 0.3041 | 20.3666 | 0.4352 | 1.6844  |
| SmallVesselStroke | log_f_Comonadaceae     | Simple mode               | 21 | 0.1352  | 0.4336 | 0.7584 | -0.0807 | 0.0764 | 0.3041 | 20.3666 | 0.4352 | 1.6844  |
| SmallVesselStroke | log_f_Comonadaceae     | Weighted mode             | 21 | -0.2523 | 0.4108 | 0.5460 | -0.0807 | 0.0764 | 0.3041 | 20.3666 | 0.4352 | 1.6844  |
| SmallVesselStroke | log_f_Moraxellaceae    | MR Egger                  | 21 | 0.3405  | 0.6359 | 0.5986 | -0.0412 | 0.0755 | 0.5916 | 7.6145  | 0.9901 | 37.1798 |
| SmallVesselStroke | log_f_Moraxellaceae    | Weighted median           | 21 | -0.0266 | 0.2211 | 0.9043 | -0.0412 | 0.0755 | 0.5916 | 7.6145  | 0.9901 | 37.1798 |
| SmallVesselStroke | log_f_Moraxellaceae    | Inverse variance weighted | 21 | 0.0051  | 0.1640 | 0.9752 | -0.0412 | 0.0755 | 0.5916 | 7.6145  | 0.9901 | 37.1798 |
| SmallVesselStroke | log_f_Moraxellaceae    | Simple mode               | 21 | -0.1847 | 0.3929 | 0.6435 | -0.0412 | 0.0755 | 0.5916 | 7.6145  | 0.9901 | 37.1798 |
| SmallVesselStroke | log_f_Moraxellaceae    | Weighted mode             | 21 | 0.0309  | 0.3991 | 0.9390 | -0.0412 | 0.0755 | 0.5916 | 7.6145  | 0.9901 | 37.1798 |
| SmallVesselStroke | log_f_Paenibacillaceae | MR Egger                  | 21 | 0.3467  | 0.6432 | 0.5962 | -0.0576 | 0.0764 | 0.4604 | 14.1735 | 0.7735 | 13.1790 |
| SmallVesselStroke | log_f_Paenibacillaceae | Weighted median           | 21 | -0.0528 | 0.2293 | 0.8177 | -0.0576 | 0.0764 | 0.4604 | 14.1735 | 0.7735 | 13.1790 |
| SmallVesselStroke | log_f_Paenibacillaceae | Inverse variance weighted | 21 | -0.1216 | 0.1658 | 0.4633 | -0.0576 | 0.0764 | 0.4604 | 14.1735 | 0.7735 | 13.1790 |
| SmallVesselStroke | log_f_Paenibacillaceae | Simple mode               | 21 | 0.3310  | 0.4434 | 0.4641 | -0.0576 | 0.0764 | 0.4604 | 14.1735 | 0.7735 | 13.1790 |
| SmallVesselStroke | log_f_Paenibacillaceae | Weighted mode             | 21 | -0.0745 | 0.4269 | 0.8632 | -0.0576 | 0.0764 | 0.4604 | 14.1735 | 0.7735 | 13.1790 |
| SmallVesselStroke | log_f_Peptococcaceae   | MR Egger                  | 21 | -0.7798 | 0.6718 | 0.2601 | 0.0965  | 0.0798 | 0.2410 | 22.5672 | 0.3105 | 5.6320  |
| SmallVesselStroke | log_f_Peptococcaceae   | Weighted median           | 21 | -0.0893 | 0.2220 | 0.6875 | 0.0965  | 0.0798 | 0.2410 | 22.5672 | 0.3105 | 5.6320  |
| SmallVesselStroke | log_f_Peptococcaceae   | Inverse variance weighted | 21 | 0.0059  | 0.1751 | 0.9733 | 0.0965  | 0.0798 | 0.2410 | 22.5672 | 0.3105 | 5.6320  |
| SmallVesselStroke | log_f_Peptococcaceae   | Simple mode               | 21 | 0.0930  | 0.4133 | 0.8243 | 0.0965  | 0.0798 | 0.2410 | 22.5672 | 0.3105 | 5.6320  |
| SmallVesselStroke | log_f_Peptococcaceae   | Weighted mode             | 21 | 0.0742  | 0.3976 | 0.8539 | 0.0965  | 0.0798 | 0.2410 | 22.5672 | 0.3105 | 5.6320  |
| SmallVesselStroke | log_f_Pseudomonadaceae | MR Egger                  | 21 | 0.3098  | 0.6397 | 0.6337 | -0.0091 | 0.0760 | 0.9063 | 18.4735 | 0.4910 | 7.2237  |
| SmallVesselStroke | log_f_Pseudomonadaceae | Weighted median           | 21 | 0.2473  | 0.2225 | 0.2662 | -0.0091 | 0.0760 | 0.9063 | 18.4735 | 0.4910 | 7.2237  |
| SmallVesselStroke | log_f_Pseudomonadaceae | Inverse variance weighted | 21 | 0.2361  | 0.1647 | 0.1518 | -0.0091 | 0.0760 | 0.9063 | 18.4735 | 0.4910 | 7.2237  |
| SmallVesselStroke | log_f_Pseudomonadaceae | Simple mode               | 21 | 0.5019  | 0.4190 | 0.2450 | -0.0091 | 0.0760 | 0.9063 | 18.4735 | 0.4910 | 7.2237  |
| SmallVesselStroke | log_f_Pseudomonadaceae | Weighted mode             | 21 | 0.5019  | 0.3930 | 0.2163 | -0.0091 | 0.0760 | 0.9063 | 18.4735 | 0.4910 | 7.2237  |

|                   |                               |                           |    |         |        |        |         |        |        |         |        |          |
|-------------------|-------------------------------|---------------------------|----|---------|--------|--------|---------|--------|--------|---------|--------|----------|
| SmallVesselStroke | log_f_Rhodocyclaceae          | MR Egger                  | 21 | -0.6884 | 0.6413 | 0.2965 | 0.0860  | 0.0761 | 0.2723 | 19.8222 | 0.4691 | 1.5955   |
| SmallVesselStroke | log_f_Rhodocyclaceae          | Weighted median           | 21 | 0.0654  | 0.2337 | 0.7795 | 0.0860  | 0.0761 | 0.2723 | 19.8222 | 0.4691 | 1.5955   |
| SmallVesselStroke | log_f_Rhodocyclaceae          | Inverse variance weighted | 21 | 0.0123  | 0.1645 | 0.9403 | 0.0860  | 0.0761 | 0.2723 | 19.8222 | 0.4691 | 1.5955   |
| SmallVesselStroke | log_f_Rhodocyclaceae          | Simple mode               | 21 | 0.1917  | 0.4293 | 0.6600 | 0.0860  | 0.0761 | 0.2723 | 19.8222 | 0.4691 | 1.5955   |
| SmallVesselStroke | log_f_Rhodocyclaceae          | Weighted mode             | 21 | 0.3199  | 0.4075 | 0.4416 | 0.0860  | 0.0761 | 0.2723 | 19.8222 | 0.4691 | 1.5955   |
| SmallVesselStroke | log_f_Succinivibrionaceae     | MR Egger                  | 21 | -0.6670 | 0.7511 | 0.3856 | 0.0879  | 0.0892 | 0.3367 | 27.8930 | 0.1120 | 6.0153   |
| SmallVesselStroke | log_f_Succinivibrionaceae     | Weighted median           | 21 | 0.0798  | 0.2425 | 0.7421 | 0.0879  | 0.0892 | 0.3367 | 27.8930 | 0.1120 | 6.0153   |
| SmallVesselStroke | log_f_Succinivibrionaceae     | Inverse variance weighted | 21 | 0.0483  | 0.1936 | 0.8029 | 0.0879  | 0.0892 | 0.3367 | 27.8930 | 0.1120 | 6.0153   |
| SmallVesselStroke | log_f_Succinivibrionaceae     | Simple mode               | 21 | 0.0762  | 0.4961 | 0.8794 | 0.0879  | 0.0892 | 0.3367 | 27.8930 | 0.1120 | 6.0153   |
| SmallVesselStroke | log_f_Succinivibrionaceae     | Weighted mode             | 21 | 0.0164  | 0.4854 | 0.9733 | 0.0879  | 0.0892 | 0.3367 | 27.8930 | 0.1120 | 6.0153   |
| SmallVesselStroke | log_f_Thermoanaerobacteraceae | MR Egger                  | 21 | -0.2902 | 0.8266 | 0.7294 | 0.0316  | 0.0981 | 0.7509 | 30.8799 | 0.0416 | 1.0101   |
| SmallVesselStroke | log_f_Thermoanaerobacteraceae | Weighted median           | 21 | 0.1262  | 0.2381 | 0.5960 | 0.0316  | 0.0981 | 0.7509 | 30.8799 | 0.0416 | 1.0101   |
| SmallVesselStroke | log_f_Thermoanaerobacteraceae | Inverse variance weighted | 21 | -0.0330 | 0.2080 | 0.8739 | 0.0316  | 0.0981 | 0.7509 | 30.8799 | 0.0416 | 1.0101   |
| SmallVesselStroke | log_f_Thermoanaerobacteraceae | Simple mode               | 21 | 0.0148  | 0.4401 | 0.9735 | 0.0316  | 0.0981 | 0.7509 | 30.8799 | 0.0416 | 1.0101   |
| SmallVesselStroke | log_f_Thermoanaerobacteraceae | Weighted mode             | 21 | 0.0577  | 0.3828 | 0.8817 | 0.0316  | 0.0981 | 0.7509 | 30.8799 | 0.0416 | 1.0101   |
| SmallVesselStroke | log_g_Acetivibrio             | MR Egger                  | 21 | -0.1184 | 0.6435 | 0.8559 | 0.0269  | 0.0764 | 0.7287 | 12.9547 | 0.8409 | 7.3146   |
| SmallVesselStroke | log_g_Acetivibrio             | Weighted median           | 21 | 0.1272  | 0.2283 | 0.5775 | 0.0269  | 0.0764 | 0.7287 | 12.9547 | 0.8409 | 7.3146   |
| SmallVesselStroke | log_g_Acetivibrio             | Inverse variance weighted | 21 | 0.1004  | 0.1656 | 0.5443 | 0.0269  | 0.0764 | 0.7287 | 12.9547 | 0.8409 | 7.3146   |
| SmallVesselStroke | log_g_Acetivibrio             | Simple mode               | 21 | 0.2116  | 0.4396 | 0.6355 | 0.0269  | 0.0764 | 0.7287 | 12.9547 | 0.8409 | 7.3146   |
| SmallVesselStroke | log_g_Acetivibrio             | Weighted mode             | 21 | 0.1950  | 0.4496 | 0.6691 | 0.0269  | 0.0764 | 0.7287 | 12.9547 | 0.8409 | 7.3146   |
| SmallVesselStroke | log_g_Achromobacter           | MR Egger                  | 21 | -0.1508 | 0.6372 | 0.8154 | 0.0027  | 0.0757 | 0.9716 | 12.5931 | 0.8587 | 27.1434  |
| SmallVesselStroke | log_g_Achromobacter           | Weighted median           | 21 | -0.1973 | 0.2218 | 0.3737 | 0.0027  | 0.0757 | 0.9716 | 12.5931 | 0.8587 | 27.1434  |
| SmallVesselStroke | log_g_Achromobacter           | Inverse variance weighted | 21 | -0.1286 | 0.1645 | 0.4342 | 0.0027  | 0.0757 | 0.9716 | 12.5931 | 0.8587 | 27.1434  |
| SmallVesselStroke | log_g_Achromobacter           | Simple mode               | 21 | -0.3306 | 0.3690 | 0.3810 | 0.0027  | 0.0757 | 0.9716 | 12.5931 | 0.8587 | 27.1434  |
| SmallVesselStroke | log_g_Achromobacter           | Weighted mode             | 21 | -0.3139 | 0.3942 | 0.4352 | 0.0027  | 0.0757 | 0.9716 | 12.5931 | 0.8587 | 27.1434  |
| SmallVesselStroke | log_g_Acidovorax              | MR Egger                  | 21 | 0.4057  | 0.8144 | 0.6241 | -0.0377 | 0.0966 | 0.7004 | 31.1200 | 0.0392 | 1.2174   |
| SmallVesselStroke | log_g_Acidovorax              | Weighted median           | 21 | 0.1081  | 0.2380 | 0.6498 | -0.0377 | 0.0966 | 0.7004 | 31.1200 | 0.0392 | 1.2174   |
| SmallVesselStroke | log_g_Acidovorax              | Inverse variance weighted | 21 | 0.0983  | 0.2047 | 0.6313 | -0.0377 | 0.0966 | 0.7004 | 31.1200 | 0.0392 | 1.2174   |
| SmallVesselStroke | log_g_Acidovorax              | Simple mode               | 21 | 0.2375  | 0.5034 | 0.6422 | -0.0377 | 0.0966 | 0.7004 | 31.1200 | 0.0392 | 1.2174   |
| SmallVesselStroke | log_g_Acidovorax              | Weighted mode             | 21 | 0.1476  | 0.4653 | 0.7543 | -0.0377 | 0.0966 | 0.7004 | 31.1200 | 0.0392 | 1.2174   |
| SmallVesselStroke | log_g_Actinobacillus          | MR Egger                  | 21 | -0.9252 | 0.7231 | 0.2162 | 0.1213  | 0.0858 | 0.1737 | 26.6840 | 0.1444 | 1.0017   |
| SmallVesselStroke | log_g_Actinobacillus          | Weighted median           | 21 | 0.0440  | 0.2315 | 0.8492 | 0.1213  | 0.0858 | 0.1737 | 26.6840 | 0.1444 | 1.0017   |
| SmallVesselStroke | log_g_Actinobacillus          | Inverse variance weighted | 21 | 0.0625  | 0.1906 | 0.7430 | 0.1213  | 0.0858 | 0.1737 | 26.6840 | 0.1444 | 1.0017   |
| SmallVesselStroke | log_g_Actinobacillus          | Simple mode               | 21 | 0.1727  | 0.4422 | 0.7002 | 0.1213  | 0.0858 | 0.1737 | 26.6840 | 0.1444 | 1.0017   |
| SmallVesselStroke | log_g_Actinobacillus          | Weighted mode             | 21 | 0.1854  | 0.3678 | 0.6198 | 0.1213  | 0.0858 | 0.1737 | 26.6840 | 0.1444 | 1.0017   |
| SmallVesselStroke | log_g_Alkaliphilus            | MR Egger                  | 21 | 0.1213  | 0.6721 | 0.8587 | -0.0284 | 0.0797 | 0.7258 | 20.4981 | 0.3652 | 2.7813   |
| SmallVesselStroke | log_g_Alkaliphilus            | Weighted median           | 21 | -0.1906 | 0.2312 | 0.4097 | -0.0284 | 0.0797 | 0.7258 | 20.4981 | 0.3652 | 2.7813   |
| SmallVesselStroke | log_g_Alkaliphilus            | Inverse variance weighted | 21 | -0.1099 | 0.1683 | 0.5138 | -0.0284 | 0.0797 | 0.7258 | 20.4981 | 0.3652 | 2.7813   |
| SmallVesselStroke | log_g_Alkaliphilus            | Simple mode               | 21 | -0.2365 | 0.4420 | 0.5985 | -0.0284 | 0.0797 | 0.7258 | 20.4981 | 0.3652 | 2.7813   |
| SmallVesselStroke | log_g_Alkaliphilus            | Weighted mode             | 21 | -0.2157 | 0.3780 | 0.5746 | -0.0284 | 0.0797 | 0.7258 | 20.4981 | 0.3652 | 2.7813   |
| SmallVesselStroke | log_g_Cellulosilyticum        | MR Egger                  | 21 | -0.4697 | 0.7764 | 0.5524 | 0.0450  | 0.0920 | 0.6304 | 27.3173 | 0.0975 | -27.7897 |
| SmallVesselStroke | log_g_Cellulosilyticum        | Weighted median           | 21 | -0.0914 | 0.2331 | 0.6950 | 0.0450  | 0.0920 | 0.6304 | 27.3173 | 0.0975 | -27.7897 |
| SmallVesselStroke | log_g_Cellulosilyticum        | Inverse variance weighted | 21 | -0.1023 | 0.1928 | 0.5956 | 0.0450  | 0.0920 | 0.6304 | 27.3173 | 0.0975 | -27.7897 |
| SmallVesselStroke | log_g_Cellulosilyticum        | Simple mode               | 21 | -0.1221 | 0.4059 | 0.7667 | 0.0450  | 0.0920 | 0.6304 | 27.3173 | 0.0975 | -27.7897 |
| SmallVesselStroke | log_g_Cellulosilyticum        | Weighted mode             | 21 | -0.2686 | 0.3717 | 0.4782 | 0.0450  | 0.0920 | 0.6304 | 27.3173 | 0.0975 | -27.7897 |
| SmallVesselStroke | log_g_Cronobacter             | MR Egger                  | 21 | -0.6041 | 0.6348 | 0.3533 | 0.0918  | 0.0754 | 0.2383 | 18.4735 | 0.5562 | 11.1807  |
| SmallVesselStroke | log_g_Cronobacter             | Weighted median           | 21 | 0.2553  | 0.2300 | 0.2670 | 0.0918  | 0.0754 | 0.2383 | 18.4735 | 0.5562 | 11.1807  |
| SmallVesselStroke | log_g_Cronobacter             | Inverse variance weighted | 21 | 0.1427  | 0.1638 | 0.3836 | 0.0918  | 0.0754 | 0.2383 | 18.4735 | 0.5562 | 11.1807  |
| SmallVesselStroke | log_g_Cronobacter             | Simple mode               | 21 | 0.3998  | 0.4510 | 0.3859 | 0.0918  | 0.0754 | 0.2383 | 18.4735 | 0.5562 | 11.1807  |
| SmallVesselStroke | log_g_Cronobacter             | Weighted mode             | 21 | 0.3178  | 0.4336 | 0.4722 | 0.0918  | 0.0754 | 0.2383 | 18.4735 | 0.5562 | 11.1807  |
| SmallVesselStroke | log_g_Dickeya                 | MR Egger                  | 21 | 0.2285  | 0.7725 | 0.7706 | -0.0313 | 0.0917 | 0.7369 | 28.0298 | 0.0829 | 1.7808   |
| SmallVesselStroke | log_g_Dickeya                 | Weighted median           | 21 | -0.0853 | 0.2440 | 0.7266 | -0.0313 | 0.0917 | 0.7369 | 28.0298 | 0.0829 | 1.7808   |
| SmallVesselStroke | log_g_Dickeya                 | Inverse variance weighted | 21 | -0.0261 | 0.1944 | 0.8933 | -0.0313 | 0.0917 | 0.7369 | 28.0298 | 0.0829 | 1.7808   |
| SmallVesselStroke | log_g_Dickeya                 | Simple mode               | 21 | -0.1823 | 0.4784 | 0.7072 | -0.0313 | 0.0917 | 0.7369 | 28.0298 | 0.0829 | 1.7808   |
| SmallVesselStroke | log_g_Dickeya                 | Weighted mode             | 21 | -0.1823 | 0.4885 | 0.7130 | -0.0313 | 0.0917 | 0.7369 | 28.0298 | 0.0829 | 1.7808   |
| SmallVesselStroke | log_g_Dysgonomonas            | MR Egger                  | 21 | -1.1851 | 0.6407 | 0.0799 | 0.1165  | 0.0760 | 0.1421 | 19.3810 | 0.4972 | 1.6645   |
| SmallVesselStroke | log_g_Dysgonomonas            | Weighted median           | 21 | -0.1845 | 0.2242 | 0.4106 | 0.1165  | 0.0760 | 0.1421 | 19.3810 | 0.4972 | 1.6645   |
| SmallVesselStroke | log_g_Dysgonomonas            | Inverse variance weighted | 21 | -0.2367 | 0.1644 | 0.1500 | 0.1165  | 0.0760 | 0.1421 | 19.3810 | 0.4972 | 1.6645   |
| SmallVesselStroke | log_g_Dysgonomonas            | Simple mode               | 21 | -0.2686 | 0.3861 | 0.4947 | 0.1165  | 0.0760 | 0.1421 | 19.3810 | 0.4972 | 1.6645   |
| SmallVesselStroke | log_g_Dysgonomonas            | Weighted mode             | 21 | -0.2466 | 0.3684 | 0.5110 | 0.1165  | 0.0760 | 0.1421 | 19.3810 | 0.4972 | 1.6645   |
| SmallVesselStroke | log_g_Edwarsiella             | MR Egger                  | 21 | 0.0949  | 0.6903 | 0.8921 | -0.0176 | 0.0820 | 0.8328 | 22.4512 | 0.2624 | 8.5580   |

|                   |                      |                           |    |         |        |        |         |        |        |         |        |         |
|-------------------|----------------------|---------------------------|----|---------|--------|--------|---------|--------|--------|---------|--------|---------|
| SmallVesselStroke | log_g_Edwardsiella   | Weighted median           | 21 | -0.0346 | 0.2334 | 0.8821 | -0.0176 | 0.0820 | 0.8328 | 22.4512 | 0.2624 | 8.5580  |
| SmallVesselStroke | log_g_Edwardsiella   | Inverse variance weighted | 21 | -0.0478 | 0.1739 | 0.7832 | -0.0176 | 0.0820 | 0.8328 | 22.4512 | 0.2624 | 8.5580  |
| SmallVesselStroke | log_g_Edwardsiella   | Simple mode               | 21 | 0.0371  | 0.4293 | 0.9319 | -0.0176 | 0.0820 | 0.8328 | 22.4512 | 0.2624 | 8.5580  |
| SmallVesselStroke | log_g_Edwardsiella   | Weighted mode             | 21 | -0.0525 | 0.4250 | 0.9029 | -0.0176 | 0.0820 | 0.8328 | 22.4512 | 0.2624 | 8.5580  |
| SmallVesselStroke | log_g_Epulopiscium   | MR Egger                  | 21 | 0.2215  | 0.6392 | 0.7327 | -0.0098 | 0.0759 | 0.8989 | 12.1533 | 0.8790 | 20.1802 |
| SmallVesselStroke | log_g_Epulopiscium   | Weighted median           | 21 | 0.2681  | 0.2187 | 0.2202 | -0.0098 | 0.0759 | 0.8989 | 12.1533 | 0.8790 | 20.1802 |
| SmallVesselStroke | log_g_Epulopiscium   | Inverse variance weighted | 21 | 0.1420  | 0.1650 | 0.3894 | -0.0098 | 0.0759 | 0.8989 | 12.1533 | 0.8790 | 20.1802 |
| SmallVesselStroke | log_g_Epulopiscium   | Simple mode               | 21 | 0.3559  | 0.3688 | 0.3461 | -0.0098 | 0.0759 | 0.8989 | 12.1533 | 0.8790 | 20.1802 |
| SmallVesselStroke | log_g_Epulopiscium   | Weighted mode             | 21 | 0.4447  | 0.3830 | 0.2593 | -0.0098 | 0.0759 | 0.8989 | 12.1533 | 0.8790 | 20.1802 |
| SmallVesselStroke | log_g_Eremococcus    | MR Egger                  | 21 | -0.7424 | 0.8433 | 0.3897 | 0.0873  | 0.1001 | 0.3937 | 34.5761 | 0.0225 | 1.7136  |
| SmallVesselStroke | log_g_Eremococcus    | Weighted median           | 21 | -0.1249 | 0.2435 | 0.6081 | 0.0873  | 0.1001 | 0.3937 | 34.5761 | 0.0225 | 1.7136  |
| SmallVesselStroke | log_g_Eremococcus    | Inverse variance weighted | 21 | -0.0312 | 0.2155 | 0.8850 | 0.0873  | 0.1001 | 0.3937 | 34.5761 | 0.0225 | 1.7136  |
| SmallVesselStroke | log_g_Eremococcus    | Simple mode               | 21 | 0.4505  | 0.5536 | 0.4253 | 0.0873  | 0.1001 | 0.3937 | 34.5761 | 0.0225 | 1.7136  |
| SmallVesselStroke | log_g_Eremococcus    | Weighted mode             | 21 | 0.4646  | 0.5085 | 0.3718 | 0.0873  | 0.1001 | 0.3937 | 34.5761 | 0.0225 | 1.7136  |
| SmallVesselStroke | log_g_Erwinia        | MR Egger                  | 21 | 0.5003  | 0.6394 | 0.4436 | -0.0683 | 0.0759 | 0.3795 | 15.5403 | 0.6877 | 5.9896  |
| SmallVesselStroke | log_g_Erwinia        | Weighted median           | 21 | -0.0774 | 0.2392 | 0.7462 | -0.0683 | 0.0759 | 0.3795 | 15.5403 | 0.6877 | 5.9896  |
| SmallVesselStroke | log_g_Erwinia        | Inverse variance weighted | 21 | -0.0557 | 0.1644 | 0.7350 | -0.0683 | 0.0759 | 0.3795 | 15.5403 | 0.6877 | 5.9896  |
| SmallVesselStroke | log_g_Erwinia        | Simple mode               | 21 | -0.1844 | 0.4605 | 0.6932 | -0.0683 | 0.0759 | 0.3795 | 15.5403 | 0.6877 | 5.9896  |
| SmallVesselStroke | log_g_Erwinia        | Weighted mode             | 21 | -0.1431 | 0.4120 | 0.7320 | -0.0683 | 0.0759 | 0.3795 | 15.5403 | 0.6877 | 5.9896  |
| SmallVesselStroke | log_g_Ethanoligenens | MR Egger                  | 21 | -0.5614 | 0.6473 | 0.3966 | 0.0729  | 0.0768 | 0.3549 | 17.4881 | 0.5568 | 5.1994  |
| SmallVesselStroke | log_g_Ethanoligenens | Weighted median           | 21 | -0.0131 | 0.2410 | 0.9566 | 0.0729  | 0.0768 | 0.3549 | 17.4881 | 0.5568 | 5.1994  |
| SmallVesselStroke | log_g_Ethanoligenens | Inverse variance weighted | 21 | 0.0318  | 0.1664 | 0.8485 | 0.0729  | 0.0768 | 0.3549 | 17.4881 | 0.5568 | 5.1994  |
| SmallVesselStroke | log_g_Ethanoligenens | Simple mode               | 21 | 0.1482  | 0.4432 | 0.7416 | 0.0729  | 0.0768 | 0.3549 | 17.4881 | 0.5568 | 5.1994  |
| SmallVesselStroke | log_g_Ethanoligenens | Weighted mode             | 21 | 0.0608  | 0.4403 | 0.8916 | 0.0729  | 0.0768 | 0.3549 | 17.4881 | 0.5568 | 5.1994  |
| SmallVesselStroke | log_g_Filifactor     | MR Egger                  | 21 | -0.0685 | 0.7629 | 0.9294 | 0.0151  | 0.0905 | 0.8693 | 27.1793 | 0.1005 | 3.1589  |
| SmallVesselStroke | log_g_Filifactor     | Weighted median           | 21 | -0.0068 | 0.2221 | 0.9758 | 0.0151  | 0.0905 | 0.8693 | 27.1793 | 0.1005 | 3.1589  |
| SmallVesselStroke | log_g_Filifactor     | Inverse variance weighted | 21 | 0.0544  | 0.1913 | 0.7759 | 0.0151  | 0.0905 | 0.8693 | 27.1793 | 0.1005 | 3.1589  |
| SmallVesselStroke | log_g_Filifactor     | Simple mode               | 21 | 0.0230  | 0.4089 | 0.9557 | 0.0151  | 0.0905 | 0.8693 | 27.1793 | 0.1005 | 3.1589  |
| SmallVesselStroke | log_g_Filifactor     | Weighted mode             | 21 | 0.0488  | 0.3866 | 0.9009 | 0.0151  | 0.0905 | 0.8693 | 27.1793 | 0.1005 | 3.1589  |
| SmallVesselStroke | log_g_Finegoldia     | MR Egger                  | 21 | -0.4792 | 0.6432 | 0.4654 | 0.0463  | 0.0764 | 0.5517 | 17.4855 | 0.5570 | 11.3635 |
| SmallVesselStroke | log_g_Finegoldia     | Weighted median           | 21 | -0.1142 | 0.2278 | 0.6163 | 0.0463  | 0.0764 | 0.5517 | 17.4855 | 0.5570 | 11.3635 |
| SmallVesselStroke | log_g_Finegoldia     | Inverse variance weighted | 21 | -0.1026 | 0.1658 | 0.5362 | 0.0463  | 0.0764 | 0.5517 | 17.4855 | 0.5570 | 11.3635 |
| SmallVesselStroke | log_g_Finegoldia     | Simple mode               | 21 | -0.0626 | 0.4498 | 0.8907 | 0.0463  | 0.0764 | 0.5517 | 17.4855 | 0.5570 | 11.3635 |
| SmallVesselStroke | log_g_Finegoldia     | Weighted mode             | 21 | -0.1467 | 0.4273 | 0.7350 | 0.0463  | 0.0764 | 0.5517 | 17.4855 | 0.5570 | 11.3635 |
| SmallVesselStroke | log_g_Gardnerella    | MR Egger                  | 21 | -0.7863 | 0.6521 | 0.2427 | 0.0758  | 0.0774 | 0.3397 | 13.6299 | 0.8488 | 5.1496  |
| SmallVesselStroke | log_g_Gardnerella    | Weighted median           | 21 | -0.0361 | 0.2303 | 0.8754 | 0.0758  | 0.0774 | 0.3397 | 13.6299 | 0.8488 | 5.1496  |
| SmallVesselStroke | log_g_Gardnerella    | Inverse variance weighted | 21 | -0.1691 | 0.1678 | 0.3136 | 0.0758  | 0.0774 | 0.3397 | 13.6299 | 0.8488 | 5.1496  |
| SmallVesselStroke | log_g_Gardnerella    | Simple mode               | 21 | 0.0572  | 0.4179 | 0.8924 | 0.0758  | 0.0774 | 0.3397 | 13.6299 | 0.8488 | 5.1496  |
| SmallVesselStroke | log_g_Gardnerella    | Weighted mode             | 21 | 0.0400  | 0.3973 | 0.9208 | 0.0758  | 0.0774 | 0.3397 | 13.6299 | 0.8488 | 5.1496  |
| SmallVesselStroke | log_g_Helicobacter   | MR Egger                  | 21 | 0.1521  | 0.6472 | 0.8168 | -0.0700 | 0.0769 | 0.3741 | 15.5024 | 0.6902 | 10.0960 |
| SmallVesselStroke | log_g_Helicobacter   | Weighted median           | 21 | -0.4131 | 0.2383 | 0.0831 | -0.0700 | 0.0769 | 0.3741 | 15.5024 | 0.6902 | 10.0960 |
| SmallVesselStroke | log_g_Helicobacter   | Inverse variance weighted | 21 | -0.4173 | 0.1666 | 0.0122 | -0.0700 | 0.0769 | 0.3741 | 15.5024 | 0.6902 | 10.0960 |
| SmallVesselStroke | log_g_Helicobacter   | Simple mode               | 21 | -0.4139 | 0.4155 | 0.3311 | -0.0700 | 0.0769 | 0.3741 | 15.5024 | 0.6902 | 10.0960 |
| SmallVesselStroke | log_g_Helicobacter   | Weighted mode             | 21 | -0.2556 | 0.4146 | 0.5445 | -0.0700 | 0.0769 | 0.3741 | 15.5024 | 0.6902 | 10.0960 |
| SmallVesselStroke | log_g_Histophilus    | MR Egger                  | 21 | -0.7067 | 0.6649 | 0.3012 | 0.0518  | 0.0789 | 0.5191 | 20.4390 | 0.3686 | 1.0858  |
| SmallVesselStroke | log_g_Histophilus    | Weighted median           | 21 | -0.2447 | 0.2294 | 0.2860 | 0.0518  | 0.0789 | 0.5191 | 20.4390 | 0.3686 | 1.0858  |
| SmallVesselStroke | log_g_Histophilus    | Inverse variance weighted | 21 | -0.2846 | 0.1683 | 0.0909 | 0.0518  | 0.0789 | 0.5191 | 20.4390 | 0.3686 | 1.0858  |
| SmallVesselStroke | log_g_Histophilus    | Simple mode               | 21 | -0.4270 | 0.4327 | 0.3355 | 0.0518  | 0.0789 | 0.5191 | 20.4390 | 0.3686 | 1.0858  |
| SmallVesselStroke | log_g_Histophilus    | Weighted mode             | 21 | -0.3734 | 0.4038 | 0.3661 | 0.0518  | 0.0789 | 0.5191 | 20.4390 | 0.3686 | 1.0858  |
| SmallVesselStroke | log_g_Kingella       | MR Egger                  | 21 | 0.1557  | 0.6854 | 0.8227 | 0.0061  | 0.0813 | 0.9409 | 21.6982 | 0.2995 | 1.3257  |
| SmallVesselStroke | log_g_Kingella       | Weighted median           | 21 | 0.1071  | 0.2359 | 0.6499 | 0.0061  | 0.0813 | 0.9409 | 21.6982 | 0.2995 | 1.3257  |
| SmallVesselStroke | log_g_Kingella       | Inverse variance weighted | 21 | 0.2055  | 0.1714 | 0.2305 | 0.0061  | 0.0813 | 0.9409 | 21.6982 | 0.2995 | 1.3257  |
| SmallVesselStroke | log_g_Kingella       | Simple mode               | 21 | -0.1800 | 0.4409 | 0.6875 | 0.0061  | 0.0813 | 0.9409 | 21.6982 | 0.2995 | 1.3257  |
| SmallVesselStroke | log_g_Kingella       | Weighted mode             | 21 | -0.1397 | 0.3769 | 0.7148 | 0.0061  | 0.0813 | 0.9409 | 21.6982 | 0.2995 | 1.3257  |
| SmallVesselStroke | log_g_Lawsonia       | MR Egger                  | 21 | 0.3073  | 0.6736 | 0.6533 | -0.0224 | 0.0799 | 0.7820 | 20.2660 | 0.3787 | 3.7915  |
| SmallVesselStroke | log_g_Lawsonia       | Weighted median           | 21 | 0.2407  | 0.2542 | 0.3438 | -0.0224 | 0.0799 | 0.7820 | 20.2660 | 0.3787 | 3.7915  |
| SmallVesselStroke | log_g_Lawsonia       | Inverse variance weighted | 21 | 0.1247  | 0.1692 | 0.4613 | -0.0224 | 0.0799 | 0.7820 | 20.2660 | 0.3787 | 3.7915  |
| SmallVesselStroke | log_g_Lawsonia       | Simple mode               | 21 | 0.3107  | 0.4161 | 0.4639 | -0.0224 | 0.0799 | 0.7820 | 20.2660 | 0.3787 | 3.7915  |
| SmallVesselStroke | log_g_Lawsonia       | Weighted mode             | 21 | 0.3107  | 0.4034 | 0.4502 | -0.0224 | 0.0799 | 0.7820 | 20.2660 | 0.3787 | 3.7915  |
| SmallVesselStroke | log_g_Leuconostoc    | MR Egger                  | 21 | -0.9747 | 0.6826 | 0.1696 | 0.1129  | 0.0810 | 0.1796 | 23.1696 | 0.2805 | 7.7157  |
| SmallVesselStroke | log_g_Leuconostoc    | Weighted median           | 21 | -0.0123 | 0.2332 | 0.9581 | 0.1129  | 0.0810 | 0.1796 | 23.1696 | 0.2805 | 7.7157  |

|                   |                         |                           |    |         |        |        |         |        |        |         |        |         |
|-------------------|-------------------------|---------------------------|----|---------|--------|--------|---------|--------|--------|---------|--------|---------|
| SmallVesselStroke | log_g_Leuconostoc       | Inverse variance weighted | 21 | -0.0555 | 0.1794 | 0.7571 | 0.1129  | 0.0810 | 0.1796 | 23.1696 | 0.2805 | 7.7157  |
| SmallVesselStroke | log_g_Leuconostoc       | Simple mode               | 21 | 0.1115  | 0.4435 | 0.8041 | 0.1129  | 0.0810 | 0.1796 | 23.1696 | 0.2805 | 7.7157  |
| SmallVesselStroke | log_g_Leuconostoc       | Weighted mode             | 21 | 0.1002  | 0.3740 | 0.7916 | 0.1129  | 0.0810 | 0.1796 | 23.1696 | 0.2805 | 7.7157  |
| SmallVesselStroke | log_g_Methylobacillus   | MR Egger                  | 21 | -0.3597 | 0.6373 | 0.5791 | 0.0244  | 0.0757 | 0.7507 | 18.5952 | 0.4831 | 20.8018 |
| SmallVesselStroke | log_g_Methylobacillus   | Weighted median           | 21 | -0.3490 | 0.2435 | 0.1518 | 0.0244  | 0.0757 | 0.7507 | 18.5952 | 0.4831 | 20.8018 |
| SmallVesselStroke | log_g_Methylobacillus   | Inverse variance weighted | 21 | -0.1612 | 0.1645 | 0.3272 | 0.0244  | 0.0757 | 0.7507 | 18.5952 | 0.4831 | 20.8018 |
| SmallVesselStroke | log_g_Methylobacillus   | Simple mode               | 21 | -0.5318 | 0.4454 | 0.2464 | 0.0244  | 0.0757 | 0.7507 | 18.5952 | 0.4831 | 20.8018 |
| SmallVesselStroke | log_g_Methylobacillus   | Weighted mode             | 21 | -0.5591 | 0.4057 | 0.1834 | 0.0244  | 0.0757 | 0.7507 | 18.5952 | 0.4831 | 20.8018 |
| SmallVesselStroke | log_g_Olsenella         | MR Egger                  | 21 | 0.1540  | 0.7015 | 0.8285 | -0.0072 | 0.0833 | 0.9317 | 22.4233 | 0.2637 | 11.9453 |
| SmallVesselStroke | log_g_Olsenella         | Weighted median           | 21 | -0.0150 | 0.2459 | 0.9515 | -0.0072 | 0.0833 | 0.9317 | 22.4233 | 0.2637 | 11.9453 |
| SmallVesselStroke | log_g_Olsenella         | Inverse variance weighted | 21 | 0.0952  | 0.1761 | 0.5888 | -0.0072 | 0.0833 | 0.9317 | 22.4233 | 0.2637 | 11.9453 |
| SmallVesselStroke | log_g_Olsenella         | Simple mode               | 21 | -0.4041 | 0.5588 | 0.4780 | -0.0072 | 0.0833 | 0.9317 | 22.4233 | 0.2637 | 11.9453 |
| SmallVesselStroke | log_g_Olsenella         | Weighted mode             | 21 | -0.4041 | 0.5343 | 0.4583 | -0.0072 | 0.0833 | 0.9317 | 22.4233 | 0.2637 | 11.9453 |
| SmallVesselStroke | log_g_Ornithinibacillus | MR Egger                  | 21 | 1.2993  | 0.8556 | 0.1453 | -0.1517 | 0.1016 | 0.1517 | 37.5840 | 0.0100 | 2.0239  |
| SmallVesselStroke | log_g_Ornithinibacillus | Weighted median           | 21 | 0.0927  | 0.2553 | 0.7164 | -0.1517 | 0.1016 | 0.1517 | 37.5840 | 0.0100 | 2.0239  |
| SmallVesselStroke | log_g_Ornithinibacillus | Inverse variance weighted | 21 | 0.0645  | 0.2267 | 0.7761 | -0.1517 | 0.1016 | 0.1517 | 37.5840 | 0.0100 | 2.0239  |
| SmallVesselStroke | log_g_Ornithinibacillus | Simple mode               | 21 | 0.6468  | 0.4449 | 0.1615 | -0.1517 | 0.1016 | 0.1517 | 37.5840 | 0.0100 | 2.0239  |
| SmallVesselStroke | log_g_Ornithinibacillus | Weighted mode             | 21 | 0.5707  | 0.4672 | 0.2361 | -0.1517 | 0.1016 | 0.1517 | 37.5840 | 0.0100 | 2.0239  |
| SmallVesselStroke | log_g_Paenibacillus     | MR Egger                  | 21 | -0.5800 | 0.6465 | 0.3809 | 0.0526  | 0.0767 | 0.5014 | 13.2998 | 0.8229 | 8.1068  |
| SmallVesselStroke | log_g_Paenibacillus     | Weighted median           | 21 | -0.2476 | 0.2276 | 0.2766 | 0.0526  | 0.0767 | 0.5014 | 13.2998 | 0.8229 | 8.1068  |
| SmallVesselStroke | log_g_Paenibacillus     | Inverse variance weighted | 21 | -0.1518 | 0.1663 | 0.3615 | 0.0526  | 0.0767 | 0.5014 | 13.2998 | 0.8229 | 8.1068  |
| SmallVesselStroke | log_g_Paenibacillus     | Simple mode               | 21 | -0.4323 | 0.4163 | 0.3114 | 0.0526  | 0.0767 | 0.5014 | 13.2998 | 0.8229 | 8.1068  |
| SmallVesselStroke | log_g_Paenibacillus     | Weighted mode             | 21 | -0.4072 | 0.4078 | 0.3300 | 0.0526  | 0.0767 | 0.5014 | 13.2998 | 0.8229 | 8.1068  |
| SmallVesselStroke | log_g_Pantoea           | MR Egger                  | 21 | -0.0149 | 0.7156 | 0.9836 | -0.0083 | 0.0850 | 0.9232 | 23.8533 | 0.2018 | 6.6356  |
| SmallVesselStroke | log_g_Pantoea           | Weighted median           | 21 | 0.0247  | 0.2355 | 0.9166 | -0.0083 | 0.0850 | 0.9232 | 23.8533 | 0.2018 | 6.6356  |
| SmallVesselStroke | log_g_Pantoea           | Inverse variance weighted | 21 | -0.0824 | 0.1798 | 0.6467 | -0.0083 | 0.0850 | 0.9232 | 23.8533 | 0.2018 | 6.6356  |
| SmallVesselStroke | log_g_Pantoea           | Simple mode               | 21 | 0.0296  | 0.4566 | 0.9490 | -0.0083 | 0.0850 | 0.9232 | 23.8533 | 0.2018 | 6.6356  |
| SmallVesselStroke | log_g_Pantoea           | Weighted mode             | 21 | 0.1051  | 0.4437 | 0.8152 | -0.0083 | 0.0850 | 0.9232 | 23.8533 | 0.2018 | 6.6356  |
| SmallVesselStroke | log_g_Pectobacterium    | MR Egger                  | 21 | -0.8530 | 0.6351 | 0.1951 | 0.1091  | 0.0754 | 0.1643 | 19.3045 | 0.5021 | 12.1925 |
| SmallVesselStroke | log_g_Pectobacterium    | Weighted median           | 21 | -0.1543 | 0.2326 | 0.5072 | 0.1091  | 0.0754 | 0.1643 | 19.3045 | 0.5021 | 12.1925 |
| SmallVesselStroke | log_g_Pectobacterium    | Inverse variance weighted | 21 | 0.0347  | 0.1638 | 0.8321 | 0.1091  | 0.0754 | 0.1643 | 19.3045 | 0.5021 | 12.1925 |
| SmallVesselStroke | log_g_Pectobacterium    | Simple mode               | 21 | -0.3126 | 0.4428 | 0.4884 | 0.1091  | 0.0754 | 0.1643 | 19.3045 | 0.5021 | 12.1925 |
| SmallVesselStroke | log_g_Pectobacterium    | Weighted mode             | 21 | -0.3126 | 0.4044 | 0.4486 | 0.1091  | 0.0754 | 0.1643 | 19.3045 | 0.5021 | 12.1925 |
| SmallVesselStroke | log_g_Pseudoramibacter  | MR Egger                  | 21 | -0.5092 | 0.6802 | 0.4632 | 0.0585  | 0.0807 | 0.4773 | 21.2299 | 0.3242 | 3.1815  |
| SmallVesselStroke | log_g_Pseudoramibacter  | Weighted median           | 21 | -0.1549 | 0.2311 | 0.5028 | 0.0585  | 0.0807 | 0.4773 | 21.2299 | 0.3242 | 3.1815  |
| SmallVesselStroke | log_g_Pseudoramibacter  | Inverse variance weighted | 21 | -0.0327 | 0.1730 | 0.8500 | 0.0585  | 0.0807 | 0.4773 | 21.2299 | 0.3242 | 3.1815  |
| SmallVesselStroke | log_g_Pseudoramibacter  | Simple mode               | 21 | -0.6004 | 0.4532 | 0.2002 | 0.0585  | 0.0807 | 0.4773 | 21.2299 | 0.3242 | 3.1815  |
| SmallVesselStroke | log_g_Pseudoramibacter  | Weighted mode             | 21 | -0.3526 | 0.4146 | 0.4052 | 0.0585  | 0.0807 | 0.4773 | 21.2299 | 0.3242 | 3.1815  |
| SmallVesselStroke | log_g_Rahnella          | MR Egger                  | 21 | -0.3239 | 0.7053 | 0.6512 | 0.0408  | 0.0838 | 0.6317 | 23.5084 | 0.2157 | 9.0832  |
| SmallVesselStroke | log_g_Rahnella          | Weighted median           | 21 | -0.0186 | 0.2344 | 0.9369 | 0.0408  | 0.0838 | 0.6317 | 23.5084 | 0.2157 | 9.0832  |
| SmallVesselStroke | log_g_Rahnella          | Inverse variance weighted | 21 | 0.0081  | 0.1785 | 0.9640 | 0.0408  | 0.0838 | 0.6317 | 23.5084 | 0.2157 | 9.0832  |
| SmallVesselStroke | log_g_Rahnella          | Simple mode               | 21 | -0.2601 | 0.4247 | 0.5471 | 0.0408  | 0.0838 | 0.6317 | 23.5084 | 0.2157 | 9.0832  |
| SmallVesselStroke | log_g_Rahnella          | Weighted mode             | 21 | -0.1816 | 0.4093 | 0.6621 | 0.0408  | 0.0838 | 0.6317 | 23.5084 | 0.2157 | 9.0832  |
| SmallVesselStroke | log_g_Selenomonas       | MR Egger                  | 21 | -0.1151 | 0.6320 | 0.8575 | 0.0361  | 0.0751 | 0.6361 | 7.7178  | 0.9893 | 37.6440 |
| SmallVesselStroke | log_g_Selenomonas       | Weighted median           | 21 | 0.1689  | 0.2226 | 0.4481 | 0.0361  | 0.0751 | 0.6361 | 7.7178  | 0.9893 | 37.6440 |
| SmallVesselStroke | log_g_Selenomonas       | Inverse variance weighted | 21 | 0.1785  | 0.1632 | 0.2740 | 0.0361  | 0.0751 | 0.6361 | 7.7178  | 0.9893 | 37.6440 |
| SmallVesselStroke | log_g_Selenomonas       | Simple mode               | 21 | 0.2926  | 0.3897 | 0.4616 | 0.0361  | 0.0751 | 0.6361 | 7.7178  | 0.9893 | 37.6440 |
| SmallVesselStroke | log_g_Selenomonas       | Weighted mode             | 21 | 0.2864  | 0.3612 | 0.4372 | 0.0361  | 0.0751 | 0.6361 | 7.7178  | 0.9893 | 37.6440 |
| SmallVesselStroke | log_g_Serratia          | MR Egger                  | 21 | -0.2946 | 0.6338 | 0.6473 | 0.0446  | 0.0753 | 0.5605 | 16.8574 | 0.5995 | 21.7513 |
| SmallVesselStroke | log_g_Serratia          | Weighted median           | 21 | 0.2077  | 0.2368 | 0.3803 | 0.0446  | 0.0753 | 0.5605 | 16.8574 | 0.5995 | 21.7513 |
| SmallVesselStroke | log_g_Serratia          | Inverse variance weighted | 21 | 0.0682  | 0.1637 | 0.6769 | 0.0446  | 0.0753 | 0.5605 | 16.8574 | 0.5995 | 21.7513 |
| SmallVesselStroke | log_g_Serratia          | Simple mode               | 21 | 0.2419  | 0.4190 | 0.5701 | 0.0446  | 0.0753 | 0.5605 | 16.8574 | 0.5995 | 21.7513 |
| SmallVesselStroke | log_g_Serratia          | Weighted mode             | 21 | 0.3173  | 0.4255 | 0.4645 | 0.0446  | 0.0753 | 0.5605 | 16.8574 | 0.5995 | 21.7513 |
| SmallVesselStroke | log_g_Shewanella        | MR Egger                  | 21 | -0.3066 | 0.6375 | 0.6361 | 0.0613  | 0.0757 | 0.4282 | 18.0303 | 0.5204 | 21.6168 |
| SmallVesselStroke | log_g_Shewanella        | Weighted median           | 21 | 0.0521  | 0.2374 | 0.8263 | 0.0613  | 0.0757 | 0.4282 | 18.0303 | 0.5204 | 21.6168 |
| SmallVesselStroke | log_g_Shewanella        | Inverse variance weighted | 21 | 0.1920  | 0.1645 | 0.2432 | 0.0613  | 0.0757 | 0.4282 | 18.0303 | 0.5204 | 21.6168 |
| SmallVesselStroke | log_g_Shewanella        | Simple mode               | 21 | -0.0981 | 0.4252 | 0.8199 | 0.0613  | 0.0757 | 0.4282 | 18.0303 | 0.5204 | 21.6168 |
| SmallVesselStroke | log_g_Shewanella        | Weighted mode             | 21 | -0.1641 | 0.4152 | 0.6969 | 0.0613  | 0.0757 | 0.4282 | 18.0303 | 0.5204 | 21.6168 |
| SmallVesselStroke | log_g_Slackia           | MR Egger                  | 21 | -0.3336 | 0.6571 | 0.6175 | 0.0503  | 0.0780 | 0.5270 | 19.8941 | 0.4010 | 7.0510  |
| SmallVesselStroke | log_g_Slackia           | Weighted median           | 21 | 0.1551  | 0.2336 | 0.5069 | 0.0503  | 0.0780 | 0.5270 | 19.8941 | 0.4010 | 7.0510  |
| SmallVesselStroke | log_g_Slackia           | Inverse variance weighted | 21 | 0.0756  | 0.1666 | 0.6503 | 0.0503  | 0.0780 | 0.5270 | 19.8941 | 0.4010 | 7.0510  |

|                   |                              |                           |    |         |        |        |         |        |        |         |        |             |
|-------------------|------------------------------|---------------------------|----|---------|--------|--------|---------|--------|--------|---------|--------|-------------|
| SmallVesselStroke | log_g_Slackia                | Simple mode               | 21 | 0.0818  | 0.4266 | 0.8498 | 0.0503  | 0.0780 | 0.5270 | 19.8941 | 0.4010 | 7.0510      |
| SmallVesselStroke | log_g_Slackia                | Weighted mode             | 21 | 0.1599  | 0.4237 | 0.7099 | 0.0503  | 0.0780 | 0.5270 | 19.8941 | 0.4010 | 7.0510      |
| SmallVesselStroke | log_g_Sodalis                | MR Egger                  | 21 | -0.1992 | 0.7633 | 0.7969 | 0.0322  | 0.0906 | 0.7261 | 27.1863 | 0.1004 | 4.9135      |
| SmallVesselStroke | log_g_Sodalis                | Weighted median           | 21 | 0.0787  | 0.2505 | 0.7532 | 0.0322  | 0.0906 | 0.7261 | 27.1863 | 0.1004 | 4.9135      |
| SmallVesselStroke | log_g_Sodalis                | Inverse variance weighted | 21 | 0.0630  | 0.1924 | 0.7434 | 0.0322  | 0.0906 | 0.7261 | 27.1863 | 0.1004 | 4.9135      |
| SmallVesselStroke | log_g_Sodalis                | Simple mode               | 21 | -0.0389 | 0.5088 | 0.9398 | 0.0322  | 0.0906 | 0.7261 | 27.1863 | 0.1004 | 4.9135      |
| SmallVesselStroke | log_g_Sodalis                | Weighted mode             | 21 | -0.0501 | 0.4835 | 0.9185 | 0.0322  | 0.0906 | 0.7261 | 27.1863 | 0.1004 | 4.9135      |
| SmallVesselStroke | log_g_Thauera                | MR Egger                  | 21 | -0.8815 | 0.7778 | 0.2712 | 0.1164  | 0.0924 | 0.2227 | 30.9729 | 0.0555 | 4.9145      |
| SmallVesselStroke | log_g_Thauera                | Weighted median           | 21 | -0.0903 | 0.2434 | 0.7107 | 0.1164  | 0.0924 | 0.2227 | 30.9729 | 0.0555 | 4.9145      |
| SmallVesselStroke | log_g_Thauera                | Inverse variance weighted | 21 | 0.0659  | 0.2036 | 0.7463 | 0.1164  | 0.0924 | 0.2227 | 30.9729 | 0.0555 | 4.9145      |
| SmallVesselStroke | log_g_Thauera                | Simple mode               | 21 | -0.0578 | 0.4855 | 0.9064 | 0.1164  | 0.0924 | 0.2227 | 30.9729 | 0.0555 | 4.9145      |
| SmallVesselStroke | log_g_Thauera                | Weighted mode             | 21 | -0.0841 | 0.4296 | 0.8469 | 0.1164  | 0.0924 | 0.2227 | 30.9729 | 0.0555 | 4.9145      |
| SmallVesselStroke | log_g_Thermoanaerobacter     | MR Egger                  | 21 | -0.6595 | 0.8604 | 0.4528 | 0.0684  | 0.1021 | 0.5106 | 32.9213 | 0.0245 | 327469.1983 |
| SmallVesselStroke | log_g_Thermoanaerobacter     | Weighted median           | 21 | 0.0571  | 0.2527 | 0.8212 | 0.0684  | 0.1021 | 0.5106 | 32.9213 | 0.0245 | 327469.1983 |
| SmallVesselStroke | log_g_Thermoanaerobacter     | Inverse variance weighted | 21 | -0.1018 | 0.2173 | 0.6396 | 0.0684  | 0.1021 | 0.5106 | 32.9213 | 0.0245 | 327469.1983 |
| SmallVesselStroke | log_g_Thermoanaerobacter     | Simple mode               | 21 | -0.4513 | 0.4645 | 0.3428 | 0.0684  | 0.1021 | 0.5106 | 32.9213 | 0.0245 | 327469.1983 |
| SmallVesselStroke | log_g_Thermoanaerobacter     | Weighted mode             | 21 | -0.0253 | 0.3942 | 0.9496 | 0.0684  | 0.1021 | 0.5106 | 32.9213 | 0.0245 | 327469.1983 |
| SmallVesselStroke | log_g_Thermoanaerobacterium  | MR Egger                  | 21 | 0.3013  | 0.6478 | 0.6471 | -0.0427 | 0.0769 | 0.5851 | 16.2234 | 0.6423 | 6.2800      |
| SmallVesselStroke | log_g_Thermoanaerobacterium  | Weighted median           | 21 | 0.0925  | 0.2375 | 0.6970 | -0.0427 | 0.0769 | 0.5851 | 16.2234 | 0.6423 | 6.2800      |
| SmallVesselStroke | log_g_Thermoanaerobacterium  | Inverse variance weighted | 21 | -0.0464 | 0.1665 | 0.7806 | -0.0427 | 0.0769 | 0.5851 | 16.2234 | 0.6423 | 6.2800      |
| SmallVesselStroke | log_g_Thermoanaerobacterium  | Simple mode               | 21 | 0.1335  | 0.4266 | 0.7575 | -0.0427 | 0.0769 | 0.5851 | 16.2234 | 0.6423 | 6.2800      |
| SmallVesselStroke | log_g_Thermoanaerobacterium  | Weighted mode             | 21 | 0.1335  | 0.4595 | 0.7743 | -0.0427 | 0.0769 | 0.5851 | 16.2234 | 0.6423 | 6.2800      |
| SmallVesselStroke | log_g_Thermosinus            | MR Egger                  | 21 | 0.5167  | 0.6357 | 0.4264 | -0.0429 | 0.0755 | 0.5763 | 14.2313 | 0.7700 | 15.1318     |
| SmallVesselStroke | log_g_Thermosinus            | Weighted median           | 21 | 0.2449  | 0.2203 | 0.2664 | -0.0429 | 0.0755 | 0.5763 | 14.2313 | 0.7700 | 15.1318     |
| SmallVesselStroke | log_g_Thermosinus            | Inverse variance weighted | 21 | 0.1674  | 0.1641 | 0.3076 | -0.0429 | 0.0755 | 0.5763 | 14.2313 | 0.7700 | 15.1318     |
| SmallVesselStroke | log_g_Thermosinus            | Simple mode               | 21 | 0.2874  | 0.3914 | 0.4714 | -0.0429 | 0.0755 | 0.5763 | 14.2313 | 0.7700 | 15.1318     |
| SmallVesselStroke | log_g_Thermosinus            | Weighted mode             | 21 | 0.3060  | 0.3840 | 0.4348 | -0.0429 | 0.0755 | 0.5763 | 14.2313 | 0.7700 | 15.1318     |
| SmallVesselStroke | log_g_Yersinia               | MR Egger                  | 21 | -0.0169 | 0.6529 | 0.9796 | -0.0053 | 0.0775 | 0.9467 | 20.1434 | 0.3860 | 3.3674      |
| SmallVesselStroke | log_g_Yersinia               | Weighted median           | 21 | -0.1752 | 0.2319 | 0.4500 | -0.0053 | 0.0775 | 0.9467 | 20.1434 | 0.3860 | 3.3674      |
| SmallVesselStroke | log_g_Yersinia               | Inverse variance weighted | 21 | -0.0596 | 0.1638 | 0.7159 | -0.0053 | 0.0775 | 0.9467 | 20.1434 | 0.3860 | 3.3674      |
| SmallVesselStroke | log_g_Yersinia               | Simple mode               | 21 | -0.3144 | 0.4302 | 0.4735 | -0.0053 | 0.0775 | 0.9467 | 20.1434 | 0.3860 | 3.3674      |
| SmallVesselStroke | log_g_Yersinia               | Weighted mode             | 21 | -0.3447 | 0.4163 | 0.4174 | -0.0053 | 0.0775 | 0.9467 | 20.1434 | 0.3860 | 3.3674      |
| SmallVesselStroke | log_o_Aeromonadales          | MR Egger                  | 21 | -0.4389 | 0.7747 | 0.5776 | 0.0691  | 0.0920 | 0.4616 | 27.8701 | 0.0860 | 1.0398      |
| SmallVesselStroke | log_o_Aeromonadales          | Weighted median           | 21 | 0.2366  | 0.2541 | 0.3518 | 0.0691  | 0.0920 | 0.4616 | 27.8701 | 0.0860 | 1.0398      |
| SmallVesselStroke | log_o_Aeromonadales          | Inverse variance weighted | 21 | 0.1237  | 0.1969 | 0.5300 | 0.0691  | 0.0920 | 0.4616 | 27.8701 | 0.0860 | 1.0398      |
| SmallVesselStroke | log_o_Aeromonadales          | Simple mode               | 21 | 0.2001  | 0.4674 | 0.6731 | 0.0691  | 0.0920 | 0.4616 | 27.8701 | 0.0860 | 1.0398      |
| SmallVesselStroke | log_o_Aeromonadales          | Weighted mode             | 21 | 0.2098  | 0.4030 | 0.6084 | 0.0691  | 0.0920 | 0.4616 | 27.8701 | 0.0860 | 1.0398      |
| SmallVesselStroke | log_o_Alteromonadales        | MR Egger                  | 21 | -0.1646 | 0.6370 | 0.7989 | 0.0490  | 0.0757 | 0.5248 | 14.7252 | 0.7399 | 29.5835     |
| SmallVesselStroke | log_o_Alteromonadales        | Weighted median           | 21 | 0.1051  | 0.2271 | 0.6437 | 0.0490  | 0.0757 | 0.5248 | 14.7252 | 0.7399 | 29.5835     |
| SmallVesselStroke | log_o_Alteromonadales        | Inverse variance weighted | 21 | 0.2342  | 0.1644 | 0.1544 | 0.0490  | 0.0757 | 0.5248 | 14.7252 | 0.7399 | 29.5835     |
| SmallVesselStroke | log_o_Alteromonadales        | Simple mode               | 21 | 0.0103  | 0.4086 | 0.9801 | 0.0490  | 0.0757 | 0.5248 | 14.7252 | 0.7399 | 29.5835     |
| SmallVesselStroke | log_o_Alteromonadales        | Weighted mode             | 21 | -0.0299 | 0.4138 | 0.9431 | 0.0490  | 0.0757 | 0.5248 | 14.7252 | 0.7399 | 29.5835     |
| SmallVesselStroke | log_o_Caulobacterales        | MR Egger                  | 21 | -0.0136 | 0.6465 | 0.9835 | 0.0063  | 0.0767 | 0.9355 | 17.2639 | 0.5720 | 4.6842      |
| SmallVesselStroke | log_o_Caulobacterales        | Weighted median           | 21 | -0.0298 | 0.2329 | 0.8981 | 0.0063  | 0.0767 | 0.9355 | 17.2639 | 0.5720 | 4.6842      |
| SmallVesselStroke | log_o_Caulobacterales        | Inverse variance weighted | 21 | 0.0376  | 0.1662 | 0.8209 | 0.0063  | 0.0767 | 0.9355 | 17.2639 | 0.5720 | 4.6842      |
| SmallVesselStroke | log_o_Caulobacterales        | Simple mode               | 21 | -0.0484 | 0.4639 | 0.9179 | 0.0063  | 0.0767 | 0.9355 | 17.2639 | 0.5720 | 4.6842      |
| SmallVesselStroke | log_o_Caulobacterales        | Weighted mode             | 21 | 0.0606  | 0.4110 | 0.8842 | 0.0063  | 0.0767 | 0.9355 | 17.2639 | 0.5720 | 4.6842      |
| SmallVesselStroke | log_o_Chromatiales           | MR Egger                  | 21 | 0.4475  | 0.6386 | 0.4920 | -0.0603 | 0.0758 | 0.4361 | 19.2076 | 0.4436 | 11.1013     |
| SmallVesselStroke | log_o_Chromatiales           | Weighted median           | 21 | 0.2679  | 0.2393 | 0.2628 | -0.0603 | 0.0758 | 0.4361 | 19.2076 | 0.4436 | 11.1013     |
| SmallVesselStroke | log_o_Chromatiales           | Inverse variance weighted | 21 | -0.0434 | 0.1637 | 0.7910 | -0.0603 | 0.0758 | 0.4361 | 19.2076 | 0.4436 | 11.1013     |
| SmallVesselStroke | log_o_Chromatiales           | Simple mode               | 21 | 0.4569  | 0.5101 | 0.3811 | -0.0603 | 0.0758 | 0.4361 | 19.2076 | 0.4436 | 11.1013     |
| SmallVesselStroke | log_o_Chromatiales           | Weighted mode             | 21 | 0.4655  | 0.4820 | 0.3457 | -0.0603 | 0.0758 | 0.4361 | 19.2076 | 0.4436 | 11.1013     |
| SmallVesselStroke | log_o_Rhizobiales            | MR Egger                  | 21 | 0.0088  | 0.6803 | 0.9898 | -0.0009 | 0.0807 | 0.9910 | 21.4819 | 0.3108 | 19.8708     |
| SmallVesselStroke | log_o_Rhizobiales            | Weighted median           | 21 | -0.2491 | 0.2200 | 0.2575 | -0.0009 | 0.0807 | 0.9910 | 21.4819 | 0.3108 | 19.8708     |
| SmallVesselStroke | log_o_Rhizobiales            | Inverse variance weighted | 21 | 0.0012  | 0.1700 | 0.9942 | -0.0009 | 0.0807 | 0.9910 | 21.4819 | 0.3108 | 19.8708     |
| SmallVesselStroke | log_o_Rhizobiales            | Simple mode               | 21 | -0.2144 | 0.4137 | 0.6100 | -0.0009 | 0.0807 | 0.9910 | 21.4819 | 0.3108 | 19.8708     |
| SmallVesselStroke | log_o_Rhizobiales            | Weighted mode             | 21 | -0.2144 | 0.3748 | 0.5737 | -0.0009 | 0.0807 | 0.9910 | 21.4819 | 0.3108 | 19.8708     |
| SmallVesselStroke | log_o_Thermoanaerobacterales | MR Egger                  | 21 | -0.0875 | 0.8131 | 0.9154 | -0.0013 | 0.0965 | 0.9890 | 29.8152 | 0.0542 | 1.5650      |
| SmallVesselStroke | log_o_Thermoanaerobacterales | Weighted median           | 21 | -0.0966 | 0.2468 | 0.6956 | -0.0013 | 0.0965 | 0.9890 | 29.8152 | 0.0542 | 1.5650      |
| SmallVesselStroke | log_o_Thermoanaerobacterales | Inverse variance weighted | 21 | -0.0985 | 0.2039 | 0.6291 | -0.0013 | 0.0965 | 0.9890 | 29.8152 | 0.0542 | 1.5650      |
| SmallVesselStroke | log_o_Thermoanaerobacterales | Simple mode               | 21 | -0.7790 | 0.5391 | 0.1640 | -0.0013 | 0.0965 | 0.9890 | 29.8152 | 0.0542 | 1.5650      |

|                   |                                   |                           |    |         |        |        |         |        |        |         |        |           |
|-------------------|-----------------------------------|---------------------------|----|---------|--------|--------|---------|--------|--------|---------|--------|-----------|
| SmallVesselStroke | log_o_Thermoanaerobacterales      | Weighted mode             | 21 | 0.3137  | 0.5279 | 0.5589 | -0.0013 | 0.0965 | 0.9890 | 29.8152 | 0.0542 | 1.5650    |
| SmallVesselStroke | log_p_Chloroflexi                 | MR Egger                  | 21 | -1.0863 | 0.7327 | 0.1546 | 0.1758  | 0.0869 | 0.0575 | 29.5357 | 0.0777 | -498.2449 |
| SmallVesselStroke | log_p_Chloroflexi                 | Weighted median           | 21 | 0.3573  | 0.2602 | 0.1697 | 0.1758  | 0.0869 | 0.0575 | 29.5357 | 0.0777 | -498.2449 |
| SmallVesselStroke | log_p_Chloroflexi                 | Inverse variance weighted | 21 | 0.3462  | 0.2013 | 0.0855 | 0.1758  | 0.0869 | 0.0575 | 29.5357 | 0.0777 | -498.2449 |
| SmallVesselStroke | log_p_Chloroflexi                 | Simple mode               | 21 | 0.3616  | 0.4727 | 0.4533 | 0.1758  | 0.0869 | 0.0575 | 29.5357 | 0.0777 | -498.2449 |
| SmallVesselStroke | log_p_Chloroflexi                 | Weighted mode             | 21 | 0.2970  | 0.4290 | 0.4967 | 0.1758  | 0.0869 | 0.0575 | 29.5357 | 0.0777 | -498.2449 |
| SmallVesselStroke | log_p_Cyanobacteria               | MR Egger                  | 21 | -1.3579 | 0.6639 | 0.0549 | 0.1869  | 0.0788 | 0.0284 | 26.4274 | 0.1522 | 1.1937    |
| SmallVesselStroke | log_p_Cyanobacteria               | Weighted median           | 21 | 0.1824  | 0.2423 | 0.4515 | 0.1869  | 0.0788 | 0.0284 | 26.4274 | 0.1522 | 1.1937    |
| SmallVesselStroke | log_p_Cyanobacteria               | Inverse variance weighted | 21 | 0.1641  | 0.1891 | 0.3856 | 0.1869  | 0.0788 | 0.0284 | 26.4274 | 0.1522 | 1.1937    |
| SmallVesselStroke | log_p_Cyanobacteria               | Simple mode               | 21 | 0.1348  | 0.4655 | 0.7752 | 0.1869  | 0.0788 | 0.0284 | 26.4274 | 0.1522 | 1.1937    |
| SmallVesselStroke | log_p_Cyanobacteria               | Weighted mode             | 21 | 0.1233  | 0.4282 | 0.7763 | 0.1869  | 0.0788 | 0.0284 | 26.4274 | 0.1522 | 1.1937    |
| SmallVesselStroke | log_p_Euryarchaeota               | MR Egger                  | 21 | -0.4127 | 0.7885 | 0.6068 | 0.0277  | 0.0935 | 0.7703 | 28.2248 | 0.0792 | 6.1084    |
| SmallVesselStroke | log_p_Euryarchaeota               | Weighted median           | 21 | -0.2797 | 0.2489 | 0.2612 | 0.0277  | 0.0935 | 0.7703 | 28.2248 | 0.0792 | 6.1084    |
| SmallVesselStroke | log_p_Euryarchaeota               | Inverse variance weighted | 21 | -0.1869 | 0.1971 | 0.3431 | 0.0277  | 0.0935 | 0.7703 | 28.2248 | 0.0792 | 6.1084    |
| SmallVesselStroke | log_p_Euryarchaeota               | Simple mode               | 21 | -0.5432 | 0.5225 | 0.3109 | 0.0277  | 0.0935 | 0.7703 | 28.2248 | 0.0792 | 6.1084    |
| SmallVesselStroke | log_p_Euryarchaeota               | Weighted mode             | 21 | -0.4543 | 0.4944 | 0.3692 | 0.0277  | 0.0935 | 0.7703 | 28.2248 | 0.0792 | 6.1084    |
| SmallVesselStroke | log_p_Fibrobacteres               | MR Egger                  | 21 | -0.7773 | 0.7045 | 0.2837 | 0.1298  | 0.0836 | 0.1371 | 25.1182 | 0.1969 | 1.8612    |
| SmallVesselStroke | log_p_Fibrobacteres               | Weighted median           | 21 | 0.2291  | 0.2586 | 0.3757 | 0.1298  | 0.0836 | 0.1371 | 25.1182 | 0.1969 | 1.8612    |
| SmallVesselStroke | log_p_Fibrobacteres               | Inverse variance weighted | 21 | 0.2797  | 0.1873 | 0.1355 | 0.1298  | 0.0836 | 0.1371 | 25.1182 | 0.1969 | 1.8612    |
| SmallVesselStroke | log_p_Fibrobacteres               | Simple mode               | 21 | 0.2831  | 0.4462 | 0.5330 | 0.1298  | 0.0836 | 0.1371 | 25.1182 | 0.1969 | 1.8612    |
| SmallVesselStroke | log_p_Fibrobacteres               | Weighted mode             | 21 | 0.2493  | 0.4511 | 0.5867 | 0.1298  | 0.0836 | 0.1371 | 25.1182 | 0.1969 | 1.8612    |
| SmallVesselStroke | log_p_Tenericutes                 | MR Egger                  | 21 | -0.9064 | 0.7221 | 0.2246 | 0.0941  | 0.0857 | 0.2859 | 25.1689 | 0.1950 | 10.8639   |
| SmallVesselStroke | log_p_Tenericutes                 | Weighted median           | 21 | 0.1213  | 0.2450 | 0.6205 | 0.0941  | 0.0857 | 0.2859 | 25.1689 | 0.1950 | 10.8639   |
| SmallVesselStroke | log_p_Tenericutes                 | Inverse variance weighted | 21 | -0.1399 | 0.1857 | 0.4513 | 0.0941  | 0.0857 | 0.2859 | 25.1689 | 0.1950 | 10.8639   |
| SmallVesselStroke | log_p_Tenericutes                 | Simple mode               | 21 | 0.4232  | 0.4861 | 0.3942 | 0.0941  | 0.0857 | 0.2859 | 25.1689 | 0.1950 | 10.8639   |
| SmallVesselStroke | log_p_Tenericutes                 | Weighted mode             | 21 | 0.3662  | 0.3897 | 0.3585 | 0.0941  | 0.0857 | 0.2859 | 25.1689 | 0.1950 | 10.8639   |
| SmallVesselStroke | log_s_Abiotrophia_defectiva       | MR Egger                  | 21 | -0.6381 | 0.6341 | 0.3270 | 0.1140  | 0.0753 | 0.1465 | 15.7583 | 0.7315 | 4.9825    |
| SmallVesselStroke | log_s_Abiotrophia_defectiva       | Weighted median           | 21 | 0.2704  | 0.2229 | 0.2252 | 0.1140  | 0.0753 | 0.1465 | 15.7583 | 0.7315 | 4.9825    |
| SmallVesselStroke | log_s_Abiotrophia_defectiva       | Inverse variance weighted | 21 | 0.2897  | 0.1632 | 0.0758 | 0.1140  | 0.0753 | 0.1465 | 15.7583 | 0.7315 | 4.9825    |
| SmallVesselStroke | log_s_Abiotrophia_defectiva       | Simple mode               | 21 | 0.1591  | 0.4316 | 0.7163 | 0.1140  | 0.0753 | 0.1465 | 15.7583 | 0.7315 | 4.9825    |
| SmallVesselStroke | log_s_Abiotrophia_defectiva       | Weighted mode             | 21 | 0.2268  | 0.3911 | 0.5684 | 0.1140  | 0.0753 | 0.1465 | 15.7583 | 0.7315 | 4.9825    |
| SmallVesselStroke | log_s_Achromobacter_piechaudii    | MR Egger                  | 21 | 0.2135  | 0.6362 | 0.7408 | -0.0423 | 0.0756 | 0.5826 | 19.0506 | 0.4536 | 14.9031   |
| SmallVesselStroke | log_s_Achromobacter_piechaudii    | Weighted median           | 21 | -0.0859 | 0.2297 | 0.7083 | -0.0423 | 0.0756 | 0.5826 | 19.0506 | 0.4536 | 14.9031   |
| SmallVesselStroke | log_s_Achromobacter_piechaudii    | Inverse variance weighted | 21 | -0.1301 | 0.1640 | 0.4275 | -0.0423 | 0.0756 | 0.5826 | 19.0506 | 0.4536 | 14.9031   |
| SmallVesselStroke | log_s_Achromobacter_piechaudii    | Simple mode               | 21 | 0.2008  | 0.3999 | 0.6211 | -0.0423 | 0.0756 | 0.5826 | 19.0506 | 0.4536 | 14.9031   |
| SmallVesselStroke | log_s_Achromobacter_piechaudii    | Weighted mode             | 21 | 0.1259  | 0.4160 | 0.7653 | -0.0423 | 0.0756 | 0.5826 | 19.0506 | 0.4536 | 14.9031   |
| SmallVesselStroke | log_s_Acidaminococcus_intestini   | MR Egger                  | 21 | 0.8170  | 0.6374 | 0.2154 | -0.0560 | 0.0757 | 0.4687 | 15.6338 | 0.6816 | 9.7152    |
| SmallVesselStroke | log_s_Acidaminococcus_intestini   | Weighted median           | 21 | 0.2423  | 0.2338 | 0.3001 | -0.0560 | 0.0757 | 0.4687 | 15.6338 | 0.6816 | 9.7152    |
| SmallVesselStroke | log_s_Acidaminococcus_intestini   | Inverse variance weighted | 21 | 0.3616  | 0.1644 | 0.0278 | -0.0560 | 0.0757 | 0.4687 | 15.6338 | 0.6816 | 9.7152    |
| SmallVesselStroke | log_s_Acidaminococcus_intestini   | Simple mode               | 21 | 0.3138  | 0.3916 | 0.4324 | -0.0560 | 0.0757 | 0.4687 | 15.6338 | 0.6816 | 9.7152    |
| SmallVesselStroke | log_s_Acidaminococcus_intestini   | Weighted mode             | 21 | 0.3404  | 0.3941 | 0.3980 | -0.0560 | 0.0757 | 0.4687 | 15.6338 | 0.6816 | 9.7152    |
| SmallVesselStroke | log_s_Acinetobacter_baumannii     | MR Egger                  | 21 | -0.6693 | 0.6373 | 0.3068 | 0.0747  | 0.0757 | 0.3360 | 15.1257 | 0.7692 | 23.5930   |
| SmallVesselStroke | log_s_Acinetobacter_baumannii     | Weighted median           | 21 | -0.1671 | 0.2265 | 0.4606 | 0.0747  | 0.0757 | 0.3360 | 15.1257 | 0.7692 | 23.5930   |
| SmallVesselStroke | log_s_Acinetobacter_baumannii     | Inverse variance weighted | 21 | -0.0615 | 0.1645 | 0.7086 | 0.0747  | 0.0757 | 0.3360 | 15.1257 | 0.7692 | 23.5930   |
| SmallVesselStroke | log_s_Acinetobacter_baumannii     | Simple mode               | 21 | -0.3893 | 0.4222 | 0.3675 | 0.0747  | 0.0757 | 0.3360 | 15.1257 | 0.7692 | 23.5930   |
| SmallVesselStroke | log_s_Acinetobacter_baumannii     | Weighted mode             | 21 | -0.3558 | 0.4133 | 0.3995 | 0.0747  | 0.0757 | 0.3360 | 15.1257 | 0.7692 | 23.5930   |
| SmallVesselStroke | log_s_Acinetobacter_haemolyticus  | MR Egger                  | 21 | 0.0047  | 0.6387 | 0.9942 | 0.0179  | 0.0758 | 0.8163 | 15.4300 | 0.6949 | 2.1554    |
| SmallVesselStroke | log_s_Acinetobacter_haemolyticus  | Weighted median           | 21 | 0.1354  | 0.2284 | 0.5534 | 0.0179  | 0.0758 | 0.8163 | 15.4300 | 0.6949 | 2.1554    |
| SmallVesselStroke | log_s_Acinetobacter_haemolyticus  | Inverse variance weighted | 21 | 0.1501  | 0.1640 | 0.3602 | 0.0179  | 0.0758 | 0.8163 | 15.4300 | 0.6949 | 2.1554    |
| SmallVesselStroke | log_s_Acinetobacter_haemolyticus  | Simple mode               | 21 | 0.0764  | 0.4183 | 0.8569 | 0.0179  | 0.0758 | 0.8163 | 15.4300 | 0.6949 | 2.1554    |
| SmallVesselStroke | log_s_Acinetobacter_haemolyticus  | Weighted mode             | 21 | 0.0764  | 0.3773 | 0.8416 | 0.0179  | 0.0758 | 0.8163 | 15.4300 | 0.6949 | 2.1554    |
| SmallVesselStroke | log_s_Aggregatibacter_aphrophilus | MR Egger                  | 21 | -0.5808 | 0.6434 | 0.3779 | 0.1027  | 0.0764 | 0.1950 | 18.3607 | 0.5637 | 3.7795    |
| SmallVesselStroke | log_s_Aggregatibacter_aphrophilus | Weighted median           | 21 | 0.1861  | 0.2320 | 0.4224 | 0.1027  | 0.0764 | 0.1950 | 18.3607 | 0.5637 | 3.7795    |
| SmallVesselStroke | log_s_Aggregatibacter_aphrophilus | Inverse variance weighted | 21 | 0.2543  | 0.1659 | 0.1253 | 0.1027  | 0.0764 | 0.1950 | 18.3607 | 0.5637 | 3.7795    |
| SmallVesselStroke | log_s_Aggregatibacter_aphrophilus | Simple mode               | 21 | 0.0092  | 0.3739 | 0.9807 | 0.1027  | 0.0764 | 0.1950 | 18.3607 | 0.5637 | 3.7795    |
| SmallVesselStroke | log_s_Aggregatibacter_aphrophilus | Weighted mode             | 21 | 0.0424  | 0.3660 | 0.9088 | 0.1027  | 0.0764 | 0.1950 | 18.3607 | 0.5637 | 3.7795    |
| SmallVesselStroke | log_s_Bifidobacterium_angulatum   | MR Egger                  | 21 | -0.5048 | 0.7330 | 0.4993 | 0.0347  | 0.0869 | 0.6941 | 23.0717 | 0.2342 | 27.5390   |
| SmallVesselStroke | log_s_Bifidobacterium_angulatum   | Weighted median           | 21 | -0.3555 | 0.2451 | 0.1469 | 0.0347  | 0.0869 | 0.6941 | 23.0717 | 0.2342 | 27.5390   |
| SmallVesselStroke | log_s_Bifidobacterium_angulatum   | Inverse variance weighted | 21 | -0.2219 | 0.1829 | 0.2251 | 0.0347  | 0.0869 | 0.6941 | 23.0717 | 0.2342 | 27.5390   |
| SmallVesselStroke | log_s_Bifidobacterium_angulatum   | Simple mode               | 21 | -0.4228 | 0.4903 | 0.3988 | 0.0347  | 0.0869 | 0.6941 | 23.0717 | 0.2342 | 27.5390   |
| SmallVesselStroke | log_s_Bifidobacterium_angulatum   | Weighted mode             | 21 | -0.4591 | 0.4387 | 0.3079 | 0.0347  | 0.0869 | 0.6941 | 23.0717 | 0.2342 | 27.5390   |

|                   |                                        |                           |    |         |        |        |         |        |        |         |        |           |
|-------------------|----------------------------------------|---------------------------|----|---------|--------|--------|---------|--------|--------|---------|--------|-----------|
| SmallVesselStroke | log_s_Bifidobacterium_dentium          | MR Egger                  | 21 | -1.1451 | 0.7757 | 0.1563 | 0.1272  | 0.0919 | 0.1824 | 28.8440 | 0.0909 | -163.4398 |
| SmallVesselStroke | log_s_Bifidobacterium_dentium          | Weighted median           | 21 | -0.0613 | 0.2494 | 0.8058 | 0.1272  | 0.0919 | 0.1824 | 28.8440 | 0.0909 | -163.4398 |
| SmallVesselStroke | log_s_Bifidobacterium_dentium          | Inverse variance weighted | 21 | -0.1070 | 0.2020 | 0.5964 | 0.1272  | 0.0919 | 0.1824 | 28.8440 | 0.0909 | -163.4398 |
| SmallVesselStroke | log_s_Bifidobacterium_dentium          | Simple mode               | 21 | -0.2204 | 0.4347 | 0.6178 | 0.1272  | 0.0919 | 0.1824 | 28.8440 | 0.0909 | -163.4398 |
| SmallVesselStroke | log_s_Bifidobacterium_dentium          | Weighted mode             | 21 | -0.1430 | 0.4086 | 0.7299 | 0.1272  | 0.0919 | 0.1824 | 28.8440 | 0.0909 | -163.4398 |
| SmallVesselStroke | log_s_Brucella_melitensis              | MR Egger                  | 21 | 0.7966  | 0.6392 | 0.2278 | -0.1056 | 0.0759 | 0.1800 | 18.1811 | 0.5755 | 1.0910    |
| SmallVesselStroke | log_s_Brucella_melitensis              | Weighted median           | 21 | -0.0584 | 0.2307 | 0.8001 | -0.1056 | 0.0759 | 0.1800 | 18.1811 | 0.5755 | 1.0910    |
| SmallVesselStroke | log_s_Brucella_melitensis              | Inverse variance weighted | 21 | -0.0631 | 0.1644 | 0.7011 | -0.1056 | 0.0759 | 0.1800 | 18.1811 | 0.5755 | 1.0910    |
| SmallVesselStroke | log_s_Brucella_melitensis              | Simple mode               | 21 | -0.0272 | 0.3832 | 0.9440 | -0.1056 | 0.0759 | 0.1800 | 18.1811 | 0.5755 | 1.0910    |
| SmallVesselStroke | log_s_Brucella_melitensis              | Weighted mode             | 21 | -0.0583 | 0.3875 | 0.8819 | -0.1056 | 0.0759 | 0.1800 | 18.1811 | 0.5755 | 1.0910    |
| SmallVesselStroke | log_s_Burkholderia_multivorans         | MR Egger                  | 21 | 0.0225  | 0.7967 | 0.9778 | 0.0128  | 0.0946 | 0.8940 | 29.8347 | 0.0539 | 5.7753    |
| SmallVesselStroke | log_s_Burkholderia_multivorans         | Weighted median           | 21 | 0.3497  | 0.2376 | 0.1411 | 0.0128  | 0.0946 | 0.8940 | 29.8347 | 0.0539 | 5.7753    |
| SmallVesselStroke | log_s_Burkholderia_multivorans         | Inverse variance weighted | 21 | 0.1264  | 0.2003 | 0.5278 | 0.0128  | 0.0946 | 0.8940 | 29.8347 | 0.0539 | 5.7753    |
| SmallVesselStroke | log_s_Burkholderia_multivorans         | Simple mode               | 21 | 0.3979  | 0.4308 | 0.3667 | 0.0128  | 0.0946 | 0.8940 | 29.8347 | 0.0539 | 5.7753    |
| SmallVesselStroke | log_s_Burkholderia_multivorans         | Weighted mode             | 21 | 0.3979  | 0.4255 | 0.3608 | 0.0128  | 0.0946 | 0.8940 | 29.8347 | 0.0539 | 5.7753    |
| SmallVesselStroke | log_s_Campylobacter_conciscus          | MR Egger                  | 21 | -0.8151 | 0.6381 | 0.2169 | 0.1251  | 0.0758 | 0.1153 | 20.8163 | 0.4080 | 7.7233    |
| SmallVesselStroke | log_s_Campylobacter_conciscus          | Weighted median           | 21 | -0.0200 | 0.2362 | 0.9325 | 0.1251  | 0.0758 | 0.1153 | 20.8163 | 0.4080 | 7.7233    |
| SmallVesselStroke | log_s_Campylobacter_conciscus          | Inverse variance weighted | 21 | 0.2025  | 0.1679 | 0.2277 | 0.1251  | 0.0758 | 0.1153 | 20.8163 | 0.4080 | 7.7233    |
| SmallVesselStroke | log_s_Campylobacter_conciscus          | Simple mode               | 21 | -0.1295 | 0.4214 | 0.7618 | 0.1251  | 0.0758 | 0.1153 | 20.8163 | 0.4080 | 7.7233    |
| SmallVesselStroke | log_s_Campylobacter_conciscus          | Weighted mode             | 21 | -0.1295 | 0.3941 | 0.7458 | 0.1251  | 0.0758 | 0.1153 | 20.8163 | 0.4080 | 7.7233    |
| SmallVesselStroke | log_s_Citrobacter_rodentium            | MR Egger                  | 21 | -0.7159 | 0.6350 | 0.2736 | 0.0828  | 0.0754 | 0.2861 | 15.5483 | 0.7442 | 15.4090   |
| SmallVesselStroke | log_s_Citrobacter_rodentium            | Weighted median           | 21 | 0.0265  | 0.2307 | 0.9085 | 0.0828  | 0.0754 | 0.2861 | 15.5483 | 0.7442 | 15.4090   |
| SmallVesselStroke | log_s_Citrobacter_rodentium            | Inverse variance weighted | 21 | -0.0426 | 0.1639 | 0.7951 | 0.0828  | 0.0754 | 0.2861 | 15.5483 | 0.7442 | 15.4090   |
| SmallVesselStroke | log_s_Citrobacter_rodentium            | Simple mode               | 21 | -0.0504 | 0.4554 | 0.9130 | 0.0828  | 0.0754 | 0.2861 | 15.5483 | 0.7442 | 15.4090   |
| SmallVesselStroke | log_s_Citrobacter_rodentium            | Weighted mode             | 21 | -0.0504 | 0.4187 | 0.9054 | 0.0828  | 0.0754 | 0.2861 | 15.5483 | 0.7442 | 15.4090   |
| SmallVesselStroke | log_s_Clostridium_butyrlicum           | MR Egger                  | 21 | -0.8354 | 0.6347 | 0.2037 | 0.0740  | 0.0754 | 0.3383 | 14.3357 | 0.8131 | 14.4160   |
| SmallVesselStroke | log_s_Clostridium_butyrlicum           | Weighted median           | 21 | -0.2938 | 0.2243 | 0.1903 | 0.0740  | 0.0754 | 0.3383 | 14.3357 | 0.8131 | 14.4160   |
| SmallVesselStroke | log_s_Clostridium_butyrlicum           | Inverse variance weighted | 21 | -0.2330 | 0.1637 | 0.1545 | 0.0740  | 0.0754 | 0.3383 | 14.3357 | 0.8131 | 14.4160   |
| SmallVesselStroke | log_s_Clostridium_butyrlicum           | Simple mode               | 21 | -0.4410 | 0.4801 | 0.3692 | 0.0740  | 0.0754 | 0.3383 | 14.3357 | 0.8131 | 14.4160   |
| SmallVesselStroke | log_s_Clostridium_butyrlicum           | Weighted mode             | 21 | 0.2996  | 0.5055 | 0.5600 | 0.0740  | 0.0754 | 0.3383 | 14.3357 | 0.8131 | 14.4160   |
| SmallVesselStroke | log_s_Clostridium_hiramonis            | MR Egger                  | 21 | 0.3602  | 0.6926 | 0.6090 | -0.0216 | 0.0822 | 0.7956 | 22.0374 | 0.2824 | NA        |
| SmallVesselStroke | log_s_Clostridium_hiramonis            | Weighted median           | 21 | 0.1452  | 0.2401 | 0.5454 | -0.0216 | 0.0822 | 0.7956 | 22.0374 | 0.2824 | NA        |
| SmallVesselStroke | log_s_Clostridium_hiramonis            | Inverse variance weighted | 21 | 0.1844  | 0.1736 | 0.2881 | -0.0216 | 0.0822 | 0.7956 | 22.0374 | 0.2824 | NA        |
| SmallVesselStroke | log_s_Clostridium_hiramonis            | Simple mode               | 21 | 0.0854  | 0.4107 | 0.8373 | -0.0216 | 0.0822 | 0.7956 | 22.0374 | 0.2824 | NA        |
| SmallVesselStroke | log_s_Clostridium_hiramonis            | Weighted mode             | 21 | 0.1374  | 0.3795 | 0.7211 | -0.0216 | 0.0822 | 0.7956 | 22.0374 | 0.2824 | NA        |
| SmallVesselStroke | log_s_Clostridium_hylemonae            | MR Egger                  | 21 | -0.1369 | 0.6415 | 0.8333 | 0.0383  | 0.0762 | 0.6206 | 16.1633 | 0.6464 | 8.8854    |
| SmallVesselStroke | log_s_Clostridium_hylemonae            | Weighted median           | 21 | 0.0076  | 0.2327 | 0.9740 | 0.0383  | 0.0762 | 0.6206 | 16.1633 | 0.6464 | 8.8854    |
| SmallVesselStroke | log_s_Clostridium_hylemonae            | Inverse variance weighted | 21 | 0.1751  | 0.1651 | 0.2888 | 0.0383  | 0.0762 | 0.6206 | 16.1633 | 0.6464 | 8.8854    |
| SmallVesselStroke | log_s_Clostridium_hylemonae            | Simple mode               | 21 | 0.0400  | 0.4214 | 0.9254 | 0.0383  | 0.0762 | 0.6206 | 16.1633 | 0.6464 | 8.8854    |
| SmallVesselStroke | log_s_Clostridium_hylemonae            | Weighted mode             | 21 | -0.0288 | 0.3835 | 0.9409 | 0.0383  | 0.0762 | 0.6206 | 16.1633 | 0.6464 | 8.8854    |
| SmallVesselStroke | log_s_Clostridium_kluyveri             | MR Egger                  | 21 | -0.2406 | 0.7004 | 0.7350 | 0.0362  | 0.0832 | 0.6687 | 23.0985 | 0.2330 | 3.5263    |
| SmallVesselStroke | log_s_Clostridium_kluyveri             | Weighted median           | 21 | 0.1087  | 0.2383 | 0.6483 | 0.0362  | 0.0832 | 0.6687 | 23.0985 | 0.2330 | 3.5263    |
| SmallVesselStroke | log_s_Clostridium_kluyveri             | Inverse variance weighted | 21 | 0.0536  | 0.1767 | 0.7619 | 0.0362  | 0.0832 | 0.6687 | 23.0985 | 0.2330 | 3.5263    |
| SmallVesselStroke | log_s_Clostridium_kluyveri             | Simple mode               | 21 | 0.1669  | 0.4119 | 0.6897 | 0.0362  | 0.0832 | 0.6687 | 23.0985 | 0.2330 | 3.5263    |
| SmallVesselStroke | log_s_Clostridium_kluyveri             | Weighted mode             | 21 | 0.1475  | 0.3823 | 0.7036 | 0.0362  | 0.0832 | 0.6687 | 23.0985 | 0.2330 | 3.5263    |
| SmallVesselStroke | log_s_Clostridium_phytofermentans      | MR Egger                  | 21 | 0.3772  | 0.6431 | 0.5645 | -0.0456 | 0.0764 | 0.5579 | 19.3015 | 0.4377 | 19.9059   |
| SmallVesselStroke | log_s_Clostridium_phytofermentans      | Weighted median           | 21 | -0.0978 | 0.2265 | 0.6659 | -0.0456 | 0.0764 | 0.5579 | 19.3015 | 0.4377 | 19.9059   |
| SmallVesselStroke | log_s_Clostridium_phytofermentans      | Inverse variance weighted | 21 | 0.0066  | 0.1648 | 0.9679 | -0.0456 | 0.0764 | 0.5579 | 19.3015 | 0.4377 | 19.9059   |
| SmallVesselStroke | log_s_Clostridium_phytofermentans      | Simple mode               | 21 | -0.1933 | 0.4479 | 0.6707 | -0.0456 | 0.0764 | 0.5579 | 19.3015 | 0.4377 | 19.9059   |
| SmallVesselStroke | log_s_Clostridium_phytofermentans      | Weighted mode             | 21 | -0.1647 | 0.4287 | 0.7048 | -0.0456 | 0.0764 | 0.5579 | 19.3015 | 0.4377 | 19.9059   |
| SmallVesselStroke | log_s_Collinsella_stercoris            | MR Egger                  | 21 | -0.1544 | 0.6407 | 0.8121 | 0.0296  | 0.0761 | 0.7011 | 16.9256 | 0.5949 | 3.9149    |
| SmallVesselStroke | log_s_Collinsella_stercoris            | Weighted median           | 21 | -0.0661 | 0.2227 | 0.7665 | 0.0296  | 0.0761 | 0.7011 | 16.9256 | 0.5949 | 3.9149    |
| SmallVesselStroke | log_s_Collinsella_stercoris            | Inverse variance weighted | 21 | 0.0868  | 0.1648 | 0.5982 | 0.0296  | 0.0761 | 0.7011 | 16.9256 | 0.5949 | 3.9149    |
| SmallVesselStroke | log_s_Collinsella_stercoris            | Simple mode               | 21 | -0.1744 | 0.4043 | 0.6709 | 0.0296  | 0.0761 | 0.7011 | 16.9256 | 0.5949 | 3.9149    |
| SmallVesselStroke | log_s_Collinsella_stercoris            | Weighted mode             | 21 | -0.1436 | 0.3964 | 0.7209 | 0.0296  | 0.0761 | 0.7011 | 16.9256 | 0.5949 | 3.9149    |
| SmallVesselStroke | log_s_Comamonas_testosteroni           | MR Egger                  | 21 | 0.4525  | 0.6962 | 0.5235 | -0.0473 | 0.0826 | 0.5737 | 22.5369 | 0.2584 | 1.0065    |
| SmallVesselStroke | log_s_Comamonas_testosteroni           | Weighted median           | 21 | 0.1796  | 0.2197 | 0.4137 | -0.0473 | 0.0826 | 0.5737 | 22.5369 | 0.2584 | 1.0065    |
| SmallVesselStroke | log_s_Comamonas_testosteroni           | Inverse variance weighted | 21 | 0.0673  | 0.1757 | 0.7015 | -0.0473 | 0.0826 | 0.5737 | 22.5369 | 0.2584 | 1.0065    |
| SmallVesselStroke | log_s_Comamonas_testosteroni           | Simple mode               | 21 | 0.2624  | 0.3687 | 0.4849 | -0.0473 | 0.0826 | 0.5737 | 22.5369 | 0.2584 | 1.0065    |
| SmallVesselStroke | log_s_Comamonas_testosteroni           | Weighted mode             | 21 | 0.2722  | 0.3573 | 0.4551 | -0.0473 | 0.0826 | 0.5737 | 22.5369 | 0.2584 | 1.0065    |
| SmallVesselStroke | log_s_Corynebacterium_glucuronolyticum | MR Egger                  | 21 | 1.2099  | 0.6407 | 0.0743 | -0.1350 | 0.0761 | 0.0919 | 14.8705 | 0.7838 | 18.2379   |

|                   |                                        |                           |    |         |        |        |         |        |        |         |        |         |
|-------------------|----------------------------------------|---------------------------|----|---------|--------|--------|---------|--------|--------|---------|--------|---------|
| SmallVesselStroke | log_s_Corynebacterium_glucuronolyticum | Weighted median           | 21 | -0.0032 | 0.2311 | 0.9891 | -0.1350 | 0.0761 | 0.0919 | 14.8705 | 0.7838 | 18.2379 |
| SmallVesselStroke | log_s_Corynebacterium_glucuronolyticum | Inverse variance weighted | 21 | 0.1110  | 0.1651 | 0.5014 | -0.1350 | 0.0761 | 0.0919 | 14.8705 | 0.7838 | 18.2379 |
| SmallVesselStroke | log_s_Corynebacterium_glucuronolyticum | Simple mode               | 21 | -0.1492 | 0.4572 | 0.7475 | -0.1350 | 0.0761 | 0.0919 | 14.8705 | 0.7838 | 18.2379 |
| SmallVesselStroke | log_s_Corynebacterium_glucuronolyticum | Weighted mode             | 21 | -0.1708 | 0.4851 | 0.7284 | -0.1350 | 0.0761 | 0.0919 | 14.8705 | 0.7838 | 18.2379 |
| SmallVesselStroke | log_s_Desulfovibrio_alaskensis         | MR Egger                  | 21 | 0.4110  | 0.6382 | 0.5273 | -0.0483 | 0.0757 | 0.5310 | 15.3619 | 0.6993 | 2.6634  |
| SmallVesselStroke | log_s_Desulfovibrio_alaskensis         | Weighted median           | 21 | 0.0247  | 0.2362 | 0.9165 | -0.0483 | 0.0757 | 0.5310 | 15.3619 | 0.6993 | 2.6634  |
| SmallVesselStroke | log_s_Desulfovibrio_alaskensis         | Inverse variance weighted | 21 | 0.0175  | 0.1640 | 0.9152 | -0.0483 | 0.0757 | 0.5310 | 15.3619 | 0.6993 | 2.6634  |
| SmallVesselStroke | log_s_Desulfovibrio_alaskensis         | Simple mode               | 21 | -0.2150 | 0.4069 | 0.6031 | -0.0483 | 0.0757 | 0.5310 | 15.3619 | 0.6993 | 2.6634  |
| SmallVesselStroke | log_s_Desulfovibrio_alaskensis         | Weighted mode             | 21 | -0.1017 | 0.4066 | 0.8051 | -0.0483 | 0.0757 | 0.5310 | 15.3619 | 0.6993 | 2.6634  |
| SmallVesselStroke | log_s_Enterobacter_asburiae            | MR Egger                  | 21 | 0.1560  | 0.7676 | 0.8411 | 0.0009  | 0.0912 | 0.9924 | 27.6579 | 0.0902 | 4.0762  |
| SmallVesselStroke | log_s_Enterobacter_asburiae            | Weighted median           | 21 | 0.3144  | 0.2363 | 0.1834 | 0.0009  | 0.0912 | 0.9924 | 27.6579 | 0.0902 | 4.0762  |
| SmallVesselStroke | log_s_Enterobacter_asburiae            | Inverse variance weighted | 21 | 0.1632  | 0.1928 | 0.3974 | 0.0009  | 0.0912 | 0.9924 | 27.6579 | 0.0902 | 4.0762  |
| SmallVesselStroke | log_s_Enterobacter_asburiae            | Simple mode               | 21 | 0.2764  | 0.4448 | 0.5413 | 0.0009  | 0.0912 | 0.9924 | 27.6579 | 0.0902 | 4.0762  |
| SmallVesselStroke | log_s_Enterobacter_asburiae            | Weighted mode             | 21 | 0.3123  | 0.4052 | 0.4499 | 0.0009  | 0.0912 | 0.9924 | 27.6579 | 0.0902 | 4.0762  |
| SmallVesselStroke | log_s_Enterobacter_cancerogenus        | MR Egger                  | 21 | -0.4272 | 0.6354 | 0.5094 | 0.0477  | 0.0755 | 0.5348 | 13.1624 | 0.8302 | 17.5671 |
| SmallVesselStroke | log_s_Enterobacter_cancerogenus        | Weighted median           | 21 | 0.0630  | 0.2325 | 0.7865 | 0.0477  | 0.0755 | 0.5348 | 13.1624 | 0.8302 | 17.5671 |
| SmallVesselStroke | log_s_Enterobacter_cancerogenus        | Inverse variance weighted | 21 | -0.0391 | 0.1639 | 0.8112 | 0.0477  | 0.0755 | 0.5348 | 13.1624 | 0.8302 | 17.5671 |
| SmallVesselStroke | log_s_Enterobacter_cancerogenus        | Simple mode               | 21 | 0.3167  | 0.4539 | 0.4933 | 0.0477  | 0.0755 | 0.5348 | 13.1624 | 0.8302 | 17.5671 |
| SmallVesselStroke | log_s_Enterobacter_cancerogenus        | Weighted mode             | 21 | 0.3092  | 0.4203 | 0.4705 | 0.0477  | 0.0755 | 0.5348 | 13.1624 | 0.8302 | 17.5671 |
| SmallVesselStroke | log_s_Escherichia_albertii             | MR Egger                  | 21 | -0.0148 | 0.6351 | 0.9817 | 0.0105  | 0.0754 | 0.8905 | 14.0500 | 0.7808 | 10.6646 |
| SmallVesselStroke | log_s_Escherichia_albertii             | Weighted median           | 21 | 0.0312  | 0.2246 | 0.8895 | 0.0105  | 0.0754 | 0.8905 | 14.0500 | 0.7808 | 10.6646 |
| SmallVesselStroke | log_s_Escherichia_albertii             | Inverse variance weighted | 21 | 0.0708  | 0.1638 | 0.6653 | 0.0105  | 0.0754 | 0.8905 | 14.0500 | 0.7808 | 10.6646 |
| SmallVesselStroke | log_s_Escherichia_albertii             | Simple mode               | 21 | -0.0913 | 0.4260 | 0.8325 | 0.0105  | 0.0754 | 0.8905 | 14.0500 | 0.7808 | 10.6646 |
| SmallVesselStroke | log_s_Escherichia_albertii             | Weighted mode             | 21 | -0.0678 | 0.4024 | 0.8679 | 0.0105  | 0.0754 | 0.8905 | 14.0500 | 0.7808 | 10.6646 |
| SmallVesselStroke | log_s_Eubacterium_cellulosolvens       | MR Egger                  | 21 | -0.1873 | 0.6354 | 0.7714 | 0.0554  | 0.0755 | 0.4721 | 13.7575 | 0.7976 | 14.3702 |
| SmallVesselStroke | log_s_Eubacterium_cellulosolvens       | Weighted median           | 21 | 0.3423  | 0.2371 | 0.1488 | 0.0554  | 0.0755 | 0.4721 | 13.7575 | 0.7976 | 14.3702 |
| SmallVesselStroke | log_s_Eubacterium_cellulosolvens       | Inverse variance weighted | 21 | 0.2631  | 0.1639 | 0.1084 | 0.0554  | 0.0755 | 0.4721 | 13.7575 | 0.7976 | 14.3702 |
| SmallVesselStroke | log_s_Eubacterium_cellulosolvens       | Simple mode               | 21 | 0.4326  | 0.4292 | 0.3255 | 0.0554  | 0.0755 | 0.4721 | 13.7575 | 0.7976 | 14.3702 |
| SmallVesselStroke | log_s_Eubacterium_cellulosolvens       | Weighted mode             | 21 | 0.4326  | 0.4129 | 0.3072 | 0.0554  | 0.0755 | 0.4721 | 13.7575 | 0.7976 | 14.3702 |
| SmallVesselStroke | log_s_Filifactor_alocis                | MR Egger                  | 21 | -0.8852 | 0.6353 | 0.1796 | 0.1207  | 0.0754 | 0.1259 | 18.9009 | 0.5283 | 7.5223  |
| SmallVesselStroke | log_s_Filifactor_alocis                | Weighted median           | 21 | 0.0906  | 0.2223 | 0.6838 | 0.1207  | 0.0754 | 0.1259 | 18.9009 | 0.5283 | 7.5223  |
| SmallVesselStroke | log_s_Filifactor_alocis                | Inverse variance weighted | 21 | 0.0975  | 0.1636 | 0.5511 | 0.1207  | 0.0754 | 0.1259 | 18.9009 | 0.5283 | 7.5223  |
| SmallVesselStroke | log_s_Filifactor_alocis                | Simple mode               | 21 | 0.1273  | 0.4032 | 0.7555 | 0.1207  | 0.0754 | 0.1259 | 18.9009 | 0.5283 | 7.5223  |
| SmallVesselStroke | log_s_Filifactor_alocis                | Weighted mode             | 21 | 0.0878  | 0.3932 | 0.8256 | 0.1207  | 0.0754 | 0.1259 | 18.9009 | 0.5283 | 7.5223  |
| SmallVesselStroke | log_s_Fusobacterium_gonidiaformans     | MR Egger                  | 21 | -0.3338 | 0.6407 | 0.6084 | 0.0340  | 0.0760 | 0.6598 | 16.1859 | 0.6448 | 2.2550  |
| SmallVesselStroke | log_s_Fusobacterium_gonidiaformans     | Weighted median           | 21 | -0.1553 | 0.2257 | 0.4915 | 0.0340  | 0.0760 | 0.6598 | 16.1859 | 0.6448 | 2.2550  |
| SmallVesselStroke | log_s_Fusobacterium_gonidiaformans     | Inverse variance weighted | 21 | -0.0568 | 0.1640 | 0.7289 | 0.0340  | 0.0760 | 0.6598 | 16.1859 | 0.6448 | 2.2550  |
| SmallVesselStroke | log_s_Fusobacterium_gonidiaformans     | Simple mode               | 21 | -0.3450 | 0.4357 | 0.4377 | 0.0340  | 0.0760 | 0.6598 | 16.1859 | 0.6448 | 2.2550  |
| SmallVesselStroke | log_s_Fusobacterium_gonidiaformans     | Weighted mode             | 21 | -0.3028 | 0.4158 | 0.4749 | 0.0340  | 0.0760 | 0.6598 | 16.1859 | 0.6448 | 2.2550  |
| SmallVesselStroke | log_s_Fusobacterium_nucleatum          | MR Egger                  | 21 | 0.0307  | 0.6408 | 0.9623 | 0.0128  | 0.0761 | 0.8685 | 17.6329 | 0.5471 | 14.2971 |
| SmallVesselStroke | log_s_Fusobacterium_nucleatum          | Weighted median           | 21 | 0.1342  | 0.2316 | 0.2133 | 0.0128  | 0.0761 | 0.8685 | 17.6329 | 0.5471 | 14.2971 |
| SmallVesselStroke | log_s_Fusobacterium_nucleatum          | Inverse variance weighted | 21 | 0.1347  | 0.1653 | 0.4153 | 0.0128  | 0.0761 | 0.8685 | 17.6329 | 0.5471 | 14.2971 |
| SmallVesselStroke | log_s_Fusobacterium_nucleatum          | Simple mode               | 21 | 0.4277  | 0.4588 | 0.3624 | 0.0128  | 0.0761 | 0.8685 | 17.6329 | 0.5471 | 14.2971 |
| SmallVesselStroke | log_s_Fusobacterium_nucleatum          | Weighted mode             | 21 | 0.4187  | 0.3948 | 0.3015 | 0.0128  | 0.0761 | 0.8685 | 17.6329 | 0.5471 | 14.2971 |
| SmallVesselStroke | log_s_Fusobacterium_periodonticum      | MR Egger                  | 21 | -0.2764 | 0.6987 | 0.6968 | 0.0265  | 0.0830 | 0.7533 | 22.8320 | 0.2448 | 12.6291 |
| SmallVesselStroke | log_s_Fusobacterium_periodonticum      | Weighted median           | 21 | -0.0822 | 0.2301 | 0.7210 | 0.0265  | 0.0830 | 0.7533 | 22.8320 | 0.2448 | 12.6291 |
| SmallVesselStroke | log_s_Fusobacterium_periodonticum      | Inverse variance weighted | 21 | -0.0612 | 0.1763 | 0.7286 | 0.0265  | 0.0830 | 0.7533 | 22.8320 | 0.2448 | 12.6291 |
| SmallVesselStroke | log_s_Fusobacterium_periodonticum      | Simple mode               | 21 | -0.0666 | 0.4000 | 0.8695 | 0.0265  | 0.0830 | 0.7533 | 22.8320 | 0.2448 | 12.6291 |
| SmallVesselStroke | log_s_Fusobacterium_periodonticum      | Weighted mode             | 21 | -0.0666 | 0.3870 | 0.8652 | 0.0265  | 0.0830 | 0.7533 | 22.8320 | 0.2448 | 12.6291 |
| SmallVesselStroke | log_s_Fusobacterium_ulcerans           | MR Egger                  | 21 | 0.1342  | 0.7664 | 0.8628 | -0.0168 | 0.0910 | 0.8551 | 26.6408 | 0.1133 | 3.2835  |
| SmallVesselStroke | log_s_Fusobacterium_ulcerans           | Weighted median           | 21 | 0.0076  | 0.2380 | 0.9746 | -0.0168 | 0.0910 | 0.8551 | 26.6408 | 0.1133 | 3.2835  |
| SmallVesselStroke | log_s_Fusobacterium_ulcerans           | Inverse variance weighted | 21 | -0.0029 | 0.1924 | 0.9881 | -0.0168 | 0.0910 | 0.8551 | 26.6408 | 0.1133 | 3.2835  |
| SmallVesselStroke | log_s_Fusobacterium_ulcerans           | Simple mode               | 21 | -0.1839 | 0.4140 | 0.6618 | -0.0168 | 0.0910 | 0.8551 | 26.6408 | 0.1133 | 3.2835  |
| SmallVesselStroke | log_s_Fusobacterium_ulcerans           | Weighted mode             | 21 | -0.1228 | 0.3550 | 0.7330 | -0.0168 | 0.0910 | 0.8551 | 26.6408 | 0.1133 | 3.2835  |
| SmallVesselStroke | log_s_Fusobacterium_varium             | MR Egger                  | 21 | -0.3704 | 0.7528 | 0.6284 | 0.0381  | 0.0894 | 0.6745 | 25.9294 | 0.1322 | 6.4536  |
| SmallVesselStroke | log_s_Fusobacterium_varium             | Weighted median           | 21 | 0.0308  | 0.2361 | 0.8963 | 0.0381  | 0.0894 | 0.6745 | 25.9294 | 0.1322 | 6.4536  |
| SmallVesselStroke | log_s_Fusobacterium_varium             | Inverse variance weighted | 21 | -0.0601 | 0.1898 | 0.7517 | 0.0381  | 0.0894 | 0.6745 | 25.9294 | 0.1322 | 6.4536  |
| SmallVesselStroke | log_s_Fusobacterium_varium             | Simple mode               | 21 | 0.0454  | 0.4557 | 0.9216 | 0.0381  | 0.0894 | 0.6745 | 25.9294 | 0.1322 | 6.4536  |
| SmallVesselStroke | log_s_Fusobacterium_varium             | Weighted mode             | 21 | -0.0352 | 0.4337 | 0.9360 | 0.0381  | 0.0894 | 0.6745 | 25.9294 | 0.1322 | 6.4536  |
| SmallVesselStroke | log_s_Gemella_haemolysans              | MR Egger                  | 21 | -0.6806 | 0.6741 | 0.3253 | 0.1307  | 0.0800 | 0.1187 | 24.0294 | 0.2411 | 3.2836  |
| SmallVesselStroke | log_s_Gemella_haemolysans              | Weighted median           | 21 | 0.4159  | 0.2362 | 0.0782 | 0.1307  | 0.0800 | 0.1187 | 24.0294 | 0.2411 | 3.2836  |

|                   |                                   |                           |    |         |        |        |         |        |        |         |        |         |
|-------------------|-----------------------------------|---------------------------|----|---------|--------|--------|---------|--------|--------|---------|--------|---------|
| SmallVesselStroke | log_s_Gemella_haemolysans         | Inverse variance weighted | 21 | 0.3842  | 0.1799 | 0.0328 | 0.1307  | 0.0800 | 0.1187 | 24.0294 | 0.2411 | 3.2836  |
| SmallVesselStroke | log_s_Gemella_haemolysans         | Simple mode               | 21 | 0.1905  | 0.4388 | 0.6688 | 0.1307  | 0.0800 | 0.1187 | 24.0294 | 0.2411 | 3.2836  |
| SmallVesselStroke | log_s_Gemella_haemolysans         | Weighted mode             | 21 | 0.2038  | 0.3920 | 0.6089 | 0.1307  | 0.0800 | 0.1187 | 24.0294 | 0.2411 | 3.2836  |
| SmallVesselStroke | log_s_Lactobacillus_amylovorus    | MR Egger                  | 21 | -0.0829 | 0.8038 | 0.9189 | 0.0095  | 0.0955 | 0.9221 | 29.6123 | 0.0569 | 4.9444  |
| SmallVesselStroke | log_s_Lactobacillus_amylovorus    | Weighted median           | 21 | 0.0578  | 0.2455 | 0.8138 | 0.0095  | 0.0955 | 0.9221 | 29.6123 | 0.0569 | 4.9444  |
| SmallVesselStroke | log_s_Lactobacillus_amylovorus    | Inverse variance weighted | 21 | -0.0060 | 0.2022 | 0.9765 | 0.0095  | 0.0955 | 0.9221 | 29.6123 | 0.0569 | 4.9444  |
| SmallVesselStroke | log_s_Lactobacillus_amylovorus    | Simple mode               | 21 | -0.0522 | 0.4303 | 0.9046 | 0.0095  | 0.0955 | 0.9221 | 29.6123 | 0.0569 | 4.9444  |
| SmallVesselStroke | log_s_Lactobacillus_amylovorus    | Weighted mode             | 21 | 0.0333  | 0.4508 | 0.9418 | 0.0095  | 0.0955 | 0.9221 | 29.6123 | 0.0569 | 4.9444  |
| SmallVesselStroke | log_s_Lactobacillus_casei         | MR Egger                  | 21 | -1.3298 | 0.6509 | 0.0552 | 0.1295  | 0.0772 | 0.1099 | 17.3227 | 0.6319 | 45.4274 |
| SmallVesselStroke | log_s_Lactobacillus_casei         | Weighted median           | 21 | -0.3077 | 0.2265 | 0.1742 | 0.1295  | 0.0772 | 0.1099 | 17.3227 | 0.6319 | 45.4274 |
| SmallVesselStroke | log_s_Lactobacillus_casei         | Inverse variance weighted | 21 | -0.2743 | 0.1663 | 0.0992 | 0.1295  | 0.0772 | 0.1099 | 17.3227 | 0.6319 | 45.4274 |
| SmallVesselStroke | log_s_Lactobacillus_casei         | Simple mode               | 21 | -0.4607 | 0.4227 | 0.2888 | 0.1295  | 0.0772 | 0.1099 | 17.3227 | 0.6319 | 45.4274 |
| SmallVesselStroke | log_s_Lactobacillus_casei         | Weighted mode             | 21 | -0.4153 | 0.4114 | 0.3248 | 0.1295  | 0.0772 | 0.1099 | 17.3227 | 0.6319 | 45.4274 |
| SmallVesselStroke | log_s_Lactobacillus_crispatus     | MR Egger                  | 21 | 0.3389  | 0.6535 | 0.6100 | -0.0468 | 0.0776 | 0.5539 | 15.4174 | 0.6957 | 2.9349  |
| SmallVesselStroke | log_s_Lactobacillus_crispatus     | Weighted median           | 21 | -0.0347 | 0.2351 | 0.8827 | -0.0468 | 0.0776 | 0.5539 | 15.4174 | 0.6957 | 2.9349  |
| SmallVesselStroke | log_s_Lactobacillus_crispatus     | Inverse variance weighted | 21 | -0.0416 | 0.1684 | 0.8049 | -0.0468 | 0.0776 | 0.5539 | 15.4174 | 0.6957 | 2.9349  |
| SmallVesselStroke | log_s_Lactobacillus_crispatus     | Simple mode               | 21 | -0.2427 | 0.3959 | 0.5468 | -0.0468 | 0.0776 | 0.5539 | 15.4174 | 0.6957 | 2.9349  |
| SmallVesselStroke | log_s_Lactobacillus_crispatus     | Weighted mode             | 21 | -0.2325 | 0.3630 | 0.5291 | -0.0468 | 0.0776 | 0.5539 | 15.4174 | 0.6957 | 2.9349  |
| SmallVesselStroke | log_s_Lactobacillus_delbrueckii   | MR Egger                  | 21 | -0.3599 | 0.6383 | 0.5795 | 0.0619  | 0.0758 | 0.4245 | 16.0435 | 0.6544 | 3.5944  |
| SmallVesselStroke | log_s_Lactobacillus_delbrueckii   | Weighted median           | 21 | 0.2835  | 0.2227 | 0.2030 | 0.0619  | 0.0758 | 0.4245 | 16.0435 | 0.6544 | 3.5944  |
| SmallVesselStroke | log_s_Lactobacillus_delbrueckii   | Inverse variance weighted | 21 | 0.1436  | 0.1643 | 0.3821 | 0.0619  | 0.0758 | 0.4245 | 16.0435 | 0.6544 | 3.5944  |
| SmallVesselStroke | log_s_Lactobacillus_delbrueckii   | Simple mode               | 21 | 0.4470  | 0.3960 | 0.2722 | 0.0619  | 0.0758 | 0.4245 | 16.0435 | 0.6544 | 3.5944  |
| SmallVesselStroke | log_s_Lactobacillus_delbrueckii   | Weighted mode             | 21 | 0.4289  | 0.4002 | 0.2965 | 0.0619  | 0.0758 | 0.4245 | 16.0435 | 0.6544 | 3.5944  |
| SmallVesselStroke | log_s_Lactobacillus_fermentum     | MR Egger                  | 21 | -0.5973 | 0.6403 | 0.3626 | 0.0635  | 0.0760 | 0.4143 | 15.2826 | 0.7045 | 6.4260  |
| SmallVesselStroke | log_s_Lactobacillus_fermentum     | Weighted median           | 21 | -0.0935 | 0.2273 | 0.6807 | 0.0635  | 0.0760 | 0.4143 | 15.2826 | 0.7045 | 6.4260  |
| SmallVesselStroke | log_s_Lactobacillus_fermentum     | Inverse variance weighted | 21 | -0.0810 | 0.1650 | 0.6237 | 0.0635  | 0.0760 | 0.4143 | 15.2826 | 0.7045 | 6.4260  |
| SmallVesselStroke | log_s_Lactobacillus_fermentum     | Simple mode               | 21 | -0.2009 | 0.4266 | 0.6428 | 0.0635  | 0.0760 | 0.4143 | 15.2826 | 0.7045 | 6.4260  |
| SmallVesselStroke | log_s_Lactobacillus_fermentum     | Weighted mode             | 21 | -0.2103 | 0.3886 | 0.5944 | 0.0635  | 0.0760 | 0.4143 | 15.2826 | 0.7045 | 6.4260  |
| SmallVesselStroke | log_s_Lactobacillus_gasseri       | MR Egger                  | 21 | -0.1794 | 0.6362 | 0.7810 | 0.0232  | 0.0755 | 0.7621 | 13.8549 | 0.7921 | 3.6499  |
| SmallVesselStroke | log_s_Lactobacillus_gasseri       | Weighted median           | 21 | 0.0909  | 0.2197 | 0.6792 | 0.0232  | 0.0755 | 0.7621 | 13.8549 | 0.7921 | 3.6499  |
| SmallVesselStroke | log_s_Lactobacillus_gasseri       | Inverse variance weighted | 21 | 0.0094  | 0.1635 | 0.9540 | 0.0232  | 0.0755 | 0.7621 | 13.8549 | 0.7921 | 3.6499  |
| SmallVesselStroke | log_s_Lactobacillus_gasseri       | Simple mode               | 21 | 0.2273  | 0.4013 | 0.5775 | 0.0232  | 0.0755 | 0.7621 | 13.8549 | 0.7921 | 3.6499  |
| SmallVesselStroke | log_s_Lactobacillus_gasseri       | Weighted mode             | 21 | 0.1909  | 0.3860 | 0.6264 | 0.0232  | 0.0755 | 0.7621 | 13.8549 | 0.7921 | 3.6499  |
| SmallVesselStroke | log_s_Lactobacillus_reuteri       | MR Egger                  | 21 | -0.8737 | 0.6929 | 0.2226 | 0.0963  | 0.0823 | 0.2561 | 24.1839 | 0.2345 | 13.3518 |
| SmallVesselStroke | log_s_Lactobacillus_reuteri       | Weighted median           | 21 | -0.1139 | 0.2353 | 0.6282 | 0.0963  | 0.0823 | 0.2561 | 24.1839 | 0.2345 | 13.3518 |
| SmallVesselStroke | log_s_Lactobacillus_reuteri       | Inverse variance weighted | 21 | -0.0898 | 0.1804 | 0.6185 | 0.0963  | 0.0823 | 0.2561 | 24.1839 | 0.2345 | 13.3518 |
| SmallVesselStroke | log_s_Lactobacillus_reuteri       | Simple mode               | 21 | 0.0333  | 0.5041 | 0.9480 | 0.0963  | 0.0823 | 0.2561 | 24.1839 | 0.2345 | 13.3518 |
| SmallVesselStroke | log_s_Lactobacillus_reuteri       | Weighted mode             | 21 | 0.2052  | 0.4916 | 0.6808 | 0.0963  | 0.0823 | 0.2561 | 24.1839 | 0.2345 | 13.3518 |
| SmallVesselStroke | log_s_Lactobacillus_vaginalis     | MR Egger                  | 21 | -0.4333 | 0.6350 | 0.5033 | 0.0091  | 0.0754 | 0.9055 | 16.7443 | 0.6072 | 4.7118  |
| SmallVesselStroke | log_s_Lactobacillus_vaginalis     | Weighted median           | 21 | -0.2332 | 0.2239 | 0.2977 | 0.0091  | 0.0754 | 0.9055 | 16.7443 | 0.6072 | 4.7118  |
| SmallVesselStroke | log_s_Lactobacillus_vaginalis     | Inverse variance weighted | 21 | -0.3594 | 0.1634 | 0.0278 | 0.0091  | 0.0754 | 0.9055 | 16.7443 | 0.6072 | 4.7118  |
| SmallVesselStroke | log_s_Lactobacillus_vaginalis     | Simple mode               | 21 | -0.2032 | 0.4352 | 0.6456 | 0.0091  | 0.0754 | 0.9055 | 16.7443 | 0.6072 | 4.7118  |
| SmallVesselStroke | log_s_Lactobacillus_vaginalis     | Weighted mode             | 21 | -0.1846 | 0.4061 | 0.6543 | 0.0091  | 0.0754 | 0.9055 | 16.7443 | 0.6072 | 4.7118  |
| SmallVesselStroke | log_s_Lawsonia_intracellularis    | MR Egger                  | 21 | 0.2422  | 0.6512 | 0.7141 | -0.0156 | 0.0773 | 0.8421 | 16.3944 | 0.6308 | 5.9741  |
| SmallVesselStroke | log_s_Lawsonia_intracellularis    | Weighted median           | 21 | 0.2564  | 0.2340 | 0.2731 | -0.0156 | 0.0773 | 0.8421 | 16.3944 | 0.6308 | 5.9741  |
| SmallVesselStroke | log_s_Lawsonia_intracellularis    | Inverse variance weighted | 21 | 0.1151  | 0.1675 | 0.4921 | -0.0156 | 0.0773 | 0.8421 | 16.3944 | 0.6308 | 5.9741  |
| SmallVesselStroke | log_s_Lawsonia_intracellularis    | Simple mode               | 21 | 0.2585  | 0.4216 | 0.5467 | -0.0156 | 0.0773 | 0.8421 | 16.3944 | 0.6308 | 5.9741  |
| SmallVesselStroke | log_s_Lawsonia_intracellularis    | Weighted mode             | 21 | 0.2816  | 0.4009 | 0.4905 | -0.0156 | 0.0773 | 0.8421 | 16.3944 | 0.6308 | 5.9741  |
| SmallVesselStroke | log_s_Leuconostoc_mesenteroides   | MR Egger                  | 21 | -0.5649 | 0.6471 | 0.3936 | 0.0534  | 0.0768 | 0.4949 | 17.4368 | 0.5603 | 25.5008 |
| SmallVesselStroke | log_s_Leuconostoc_mesenteroides   | Weighted median           | 21 | -0.1483 | 0.2279 | 0.5153 | 0.0534  | 0.0768 | 0.4949 | 17.4368 | 0.5603 | 25.5008 |
| SmallVesselStroke | log_s_Leuconostoc_mesenteroides   | Inverse variance weighted | 21 | -0.1295 | 0.1655 | 0.4339 | 0.0534  | 0.0768 | 0.4949 | 17.4368 | 0.5603 | 25.5008 |
| SmallVesselStroke | log_s_Leuconostoc_mesenteroides   | Simple mode               | 21 | -0.1758 | 0.3970 | 0.6626 | 0.0534  | 0.0768 | 0.4949 | 17.4368 | 0.5603 | 25.5008 |
| SmallVesselStroke | log_s_Leuconostoc_mesenteroides   | Weighted mode             | 21 | -0.1177 | 0.3886 | 0.7651 | 0.0534  | 0.0768 | 0.4949 | 17.4368 | 0.5603 | 25.5008 |
| SmallVesselStroke | log_s_Methylobacillus_flagellatus | MR Egger                  | 21 | -0.3166 | 0.7049 | 0.6584 | 0.0070  | 0.0837 | 0.9338 | 23.0736 | 0.2341 | 2.2817  |
| SmallVesselStroke | log_s_Methylobacillus_flagellatus | Weighted median           | 21 | -0.2306 | 0.2328 | 0.3219 | 0.0070  | 0.0837 | 0.9338 | 23.0736 | 0.2341 | 2.2817  |
| SmallVesselStroke | log_s_Methylobacillus_flagellatus | Inverse variance weighted | 21 | -0.2593 | 0.1768 | 0.1426 | 0.0070  | 0.0837 | 0.9338 | 23.0736 | 0.2341 | 2.2817  |
| SmallVesselStroke | log_s_Methylobacillus_flagellatus | Simple mode               | 21 | -0.3248 | 0.4501 | 0.4788 | 0.0070  | 0.0837 | 0.9338 | 23.0736 | 0.2341 | 2.2817  |
| SmallVesselStroke | log_s_Methylobacillus_flagellatus | Weighted mode             | 21 | -0.3040 | 0.4041 | 0.4606 | 0.0070  | 0.0837 | 0.9338 | 23.0736 | 0.2341 | 2.2817  |
| SmallVesselStroke | log_s_Mobiluncus_mulieris         | MR Egger                  | 21 | 0.0113  | 0.6488 | 0.9863 | 0.0002  | 0.0770 | 0.9975 | 11.9014 | 0.8898 | 16.5554 |
| SmallVesselStroke | log_s_Mobiluncus_mulieris         | Weighted median           | 21 | -0.0485 | 0.2346 | 0.8362 | 0.0002  | 0.0770 | 0.9975 | 11.9014 | 0.8898 | 16.5554 |
| SmallVesselStroke | log_s_Mobiluncus_mulieris         | Inverse variance weighted | 21 | 0.0133  | 0.1672 | 0.9368 | 0.0002  | 0.0770 | 0.9975 | 11.9014 | 0.8898 | 16.5554 |

|                   |                                   |                           |    |         |        |        |         |        |        |         |        |         |
|-------------------|-----------------------------------|---------------------------|----|---------|--------|--------|---------|--------|--------|---------|--------|---------|
| SmallVesselStroke | log_s_Mobiluncus_mulieris         | Simple mode               | 21 | 0.3766  | 0.4242 | 0.3852 | 0.0002  | 0.0770 | 0.9975 | 11.9014 | 0.8898 | 16.5554 |
| SmallVesselStroke | log_s_Mobiluncus_mulieris         | Weighted mode             | 21 | 0.2357  | 0.4337 | 0.5928 | 0.0002  | 0.0770 | 0.9975 | 11.9014 | 0.8898 | 16.5554 |
| SmallVesselStroke | log_s_Neisseria_flavescens        | MR Egger                  | 21 | -1.0249 | 0.6623 | 0.1382 | 0.1505  | 0.0786 | 0.0709 | 24.3777 | 0.2263 | 4.1530  |
| SmallVesselStroke | log_s_Neisseria_flavescens        | Weighted median           | 21 | 0.0746  | 0.2367 | 0.7528 | 0.1505  | 0.0786 | 0.0709 | 24.3777 | 0.2263 | 4.1530  |
| SmallVesselStroke | log_s_Neisseria_flavescens        | Inverse variance weighted | 21 | 0.1991  | 0.1817 | 0.2732 | 0.1505  | 0.0786 | 0.0709 | 24.3777 | 0.2263 | 4.1530  |
| SmallVesselStroke | log_s_Neisseria_flavescens        | Simple mode               | 21 | 0.0740  | 0.4529 | 0.8718 | 0.1505  | 0.0786 | 0.0709 | 24.3777 | 0.2263 | 4.1530  |
| SmallVesselStroke | log_s_Neisseria_flavescens        | Weighted mode             | 21 | 0.1070  | 0.4590 | 0.8181 | 0.1505  | 0.0786 | 0.0709 | 24.3777 | 0.2263 | 4.1530  |
| SmallVesselStroke | log_s_Neisseria_gonorrhoeae       | MR Egger                  | 21 | -0.8634 | 0.6392 | 0.1926 | 0.1279  | 0.0759 | 0.1085 | 18.4238 | 0.5595 | 14.4901 |
| SmallVesselStroke | log_s_Neisseria_gonorrhoeae       | Weighted median           | 21 | 0.0900  | 0.2316 | 0.6974 | 0.1279  | 0.0759 | 0.1085 | 18.4238 | 0.5595 | 14.4901 |
| SmallVesselStroke | log_s_Neisseria_gonorrhoeae       | Inverse variance weighted | 21 | 0.1765  | 0.1651 | 0.2852 | 0.1279  | 0.0759 | 0.1085 | 18.4238 | 0.5595 | 14.4901 |
| SmallVesselStroke | log_s_Neisseria_gonorrhoeae       | Simple mode               | 21 | 0.3814  | 0.4900 | 0.4454 | 0.1279  | 0.0759 | 0.1085 | 18.4238 | 0.5595 | 14.4901 |
| SmallVesselStroke | log_s_Neisseria_gonorrhoeae       | Weighted mode             | 21 | 0.3406  | 0.4696 | 0.4767 | 0.1279  | 0.0759 | 0.1085 | 18.4238 | 0.5595 | 14.4901 |
| SmallVesselStroke | log_s_Neisseria_meningitidis      | MR Egger                  | 21 | -0.6231 | 0.6484 | 0.3486 | 0.0826  | 0.0769 | 0.2966 | 14.0122 | 0.8299 | 2.8642  |
| SmallVesselStroke | log_s_Neisseria_meningitidis      | Weighted median           | 21 | 0.1913  | 0.2260 | 0.3972 | 0.0826  | 0.0769 | 0.2966 | 14.0122 | 0.8299 | 2.8642  |
| SmallVesselStroke | log_s_Neisseria_meningitidis      | Inverse variance weighted | 21 | 0.0495  | 0.1661 | 0.7658 | 0.0826  | 0.0769 | 0.2966 | 14.0122 | 0.8299 | 2.8642  |
| SmallVesselStroke | log_s_Neisseria_meningitidis      | Simple mode               | 21 | 0.2792  | 0.3836 | 0.4751 | 0.0826  | 0.0769 | 0.2966 | 14.0122 | 0.8299 | 2.8642  |
| SmallVesselStroke | log_s_Neisseria_meningitidis      | Weighted mode             | 21 | 0.2580  | 0.3659 | 0.4889 | 0.0826  | 0.0769 | 0.2966 | 14.0122 | 0.8299 | 2.8642  |
| SmallVesselStroke | log_s_Neisseria_mucosa            | MR Egger                  | 21 | -0.7729 | 0.6441 | 0.2449 | 0.0904  | 0.0765 | 0.2517 | 18.6351 | 0.5456 | 4.1652  |
| SmallVesselStroke | log_s_Neisseria_mucosa            | Weighted median           | 21 | 0.1682  | 0.2303 | 0.4651 | 0.0904  | 0.0765 | 0.2517 | 18.6351 | 0.5456 | 4.1652  |
| SmallVesselStroke | log_s_Neisseria_mucosa            | Inverse variance weighted | 21 | -0.0372 | 0.1659 | 0.8225 | 0.0904  | 0.0765 | 0.2517 | 18.6351 | 0.5456 | 4.1652  |
| SmallVesselStroke | log_s_Neisseria_mucosa            | Simple mode               | 21 | 0.3217  | 0.4398 | 0.4729 | 0.0904  | 0.0765 | 0.2517 | 18.6351 | 0.5456 | 4.1652  |
| SmallVesselStroke | log_s_Neisseria_mucosa            | Weighted mode             | 21 | 0.3217  | 0.4393 | 0.4724 | 0.0904  | 0.0765 | 0.2517 | 18.6351 | 0.5456 | 4.1652  |
| SmallVesselStroke | log_s_Neisseria_subflava          | MR Egger                  | 21 | -0.6228 | 0.6940 | 0.3807 | 0.0876  | 0.0824 | 0.3013 | 23.8943 | 0.2470 | 3.9596  |
| SmallVesselStroke | log_s_Neisseria_subflava          | Weighted median           | 21 | 0.1114  | 0.2344 | 0.6344 | 0.0876  | 0.0824 | 0.3013 | 23.8943 | 0.2470 | 3.9596  |
| SmallVesselStroke | log_s_Neisseria_subflava          | Inverse variance weighted | 21 | 0.0896  | 0.1798 | 0.6183 | 0.0876  | 0.0824 | 0.3013 | 23.8943 | 0.2470 | 3.9596  |
| SmallVesselStroke | log_s_Neisseria_subflava          | Simple mode               | 21 | 0.2393  | 0.4356 | 0.5888 | 0.0876  | 0.0824 | 0.3013 | 23.8943 | 0.2470 | 3.9596  |
| SmallVesselStroke | log_s_Neisseria_subflava          | Weighted mode             | 21 | -0.0205 | 0.4329 | 0.9627 | 0.0876  | 0.0824 | 0.3013 | 23.8943 | 0.2470 | 3.9596  |
| SmallVesselStroke | log_s_Oscillibacter_valericigenes | MR Egger                  | 21 | 0.1156  | 0.6451 | 0.8596 | -0.0336 | 0.0766 | 0.6662 | 18.3949 | 0.4962 | 10.7229 |
| SmallVesselStroke | log_s_Oscillibacter_valericigenes | Weighted median           | 21 | -0.2877 | 0.2404 | 0.2314 | -0.0336 | 0.0766 | 0.6662 | 18.3949 | 0.4962 | 10.7229 |
| SmallVesselStroke | log_s_Oscillibacter_valericigenes | Inverse variance weighted | 21 | -0.1575 | 0.1660 | 0.3425 | -0.0336 | 0.0766 | 0.6662 | 18.3949 | 0.4962 | 10.7229 |
| SmallVesselStroke | log_s_Oscillibacter_valericigenes | Simple mode               | 21 | -0.6681 | 0.4663 | 0.1673 | -0.0336 | 0.0766 | 0.6662 | 18.3949 | 0.4962 | 10.7229 |
| SmallVesselStroke | log_s_Oscillibacter_valericigenes | Weighted mode             | 21 | -0.6297 | 0.4436 | 0.1712 | -0.0336 | 0.0766 | 0.6662 | 18.3949 | 0.4962 | 10.7229 |
| SmallVesselStroke | log_s_Pantoea_ananatis            | MR Egger                  | 21 | 0.3432  | 0.6954 | 0.6274 | -0.0488 | 0.0826 | 0.5613 | 22.7045 | 0.2506 | 8.1641  |
| SmallVesselStroke | log_s_Pantoea_ananatis            | Weighted median           | 21 | -0.0252 | 0.2546 | 0.9212 | -0.0488 | 0.0826 | 0.5613 | 22.7045 | 0.2506 | 8.1641  |
| SmallVesselStroke | log_s_Pantoea_ananatis            | Inverse variance weighted | 21 | -0.0542 | 0.1764 | 0.7587 | -0.0488 | 0.0826 | 0.5613 | 22.7045 | 0.2506 | 8.1641  |
| SmallVesselStroke | log_s_Pantoea_ananatis            | Simple mode               | 21 | 0.5677  | 0.4963 | 0.2662 | -0.0488 | 0.0826 | 0.5613 | 22.7045 | 0.2506 | 8.1641  |
| SmallVesselStroke | log_s_Pantoea_ananatis            | Weighted mode             | 21 | 0.5163  | 0.4783 | 0.2932 | -0.0488 | 0.0826 | 0.5613 | 22.7045 | 0.2506 | 8.1641  |
| SmallVesselStroke | log_s_Peptoniphilus_duerdenii     | MR Egger                  | 21 | 0.4360  | 0.7843 | 0.5847 | -0.0663 | 0.0932 | 0.4852 | 28.0525 | 0.0824 | 11.7385 |
| SmallVesselStroke | log_s_Peptoniphilus_duerdenii     | Weighted median           | 21 | -0.2165 | 0.2441 | 0.3751 | -0.0663 | 0.0932 | 0.4852 | 28.0525 | 0.0824 | 11.7385 |
| SmallVesselStroke | log_s_Peptoniphilus_duerdenii     | Inverse variance weighted | 21 | -0.1034 | 0.1998 | 0.6046 | -0.0663 | 0.0932 | 0.4852 | 28.0525 | 0.0824 | 11.7385 |
| SmallVesselStroke | log_s_Peptoniphilus_duerdenii     | Simple mode               | 21 | -0.0398 | 0.3991 | 0.9216 | -0.0663 | 0.0932 | 0.4852 | 28.0525 | 0.0824 | 11.7385 |
| SmallVesselStroke | log_s_Peptoniphilus_duerdenii     | Weighted mode             | 21 | -0.1169 | 0.3940 | 0.7697 | -0.0663 | 0.0932 | 0.4852 | 28.0525 | 0.0824 | 11.7385 |
| SmallVesselStroke | log_s_Peptoniphilus_harei         | MR Egger                  | 21 | 0.5350  | 0.6532 | 0.4229 | -0.0616 | 0.0775 | 0.4368 | 14.0117 | 0.7830 | 1.7767  |
| SmallVesselStroke | log_s_Peptoniphilus_harei         | Weighted median           | 21 | 0.1605  | 0.2300 | 0.4851 | -0.0616 | 0.0775 | 0.4368 | 14.0117 | 0.7830 | 1.7767  |
| SmallVesselStroke | log_s_Peptoniphilus_harei         | Inverse variance weighted | 21 | 0.0335  | 0.1674 | 0.8416 | -0.0616 | 0.0775 | 0.4368 | 14.0117 | 0.7830 | 1.7767  |
| SmallVesselStroke | log_s_Peptoniphilus_harei         | Simple mode               | 21 | 0.2734  | 0.4173 | 0.5198 | -0.0616 | 0.0775 | 0.4368 | 14.0117 | 0.7830 | 1.7767  |
| SmallVesselStroke | log_s_Peptoniphilus_harei         | Weighted mode             | 21 | 0.2991  | 0.4307 | 0.4955 | -0.0616 | 0.0775 | 0.4368 | 14.0117 | 0.7830 | 1.7767  |
| SmallVesselStroke | log_s_Porphyromonas_endodontalis  | MR Egger                  | 21 | -0.1423 | 0.6390 | 0.8261 | 0.0472  | 0.0758 | 0.5407 | 7.1072  | 0.9936 | 1.3246  |
| SmallVesselStroke | log_s_Porphyromonas_endodontalis  | Weighted median           | 21 | 0.2447  | 0.2223 | 0.2712 | 0.0472  | 0.0758 | 0.5407 | 7.1072  | 0.9936 | 1.3246  |
| SmallVesselStroke | log_s_Porphyromonas_endodontalis  | Inverse variance weighted | 21 | 0.2425  | 0.1639 | 0.1389 | 0.0472  | 0.0758 | 0.5407 | 7.1072  | 0.9936 | 1.3246  |
| SmallVesselStroke | log_s_Porphyromonas_endodontalis  | Simple mode               | 21 | 0.2796  | 0.3515 | 0.4357 | 0.0472  | 0.0758 | 0.5407 | 7.1072  | 0.9936 | 1.3246  |
| SmallVesselStroke | log_s_Porphyromonas_endodontalis  | Weighted mode             | 21 | 0.2796  | 0.3449 | 0.4272 | 0.0472  | 0.0758 | 0.5407 | 7.1072  | 0.9936 | 1.3246  |
| SmallVesselStroke | log_s_Porphyromonas_gingivalis    | MR Egger                  | 21 | -0.4239 | 0.6473 | 0.5204 | 0.0772  | 0.0768 | 0.3273 | 17.4981 | 0.6204 | 11.1456 |
| SmallVesselStroke | log_s_Porphyromonas_gingivalis    | Weighted median           | 21 | 0.3767  | 0.2299 | 0.1013 | 0.0772  | 0.0768 | 0.3273 | 17.4981 | 0.6204 | 11.1456 |
| SmallVesselStroke | log_s_Porphyromonas_gingivalis    | Inverse variance weighted | 21 | 0.2054  | 0.1653 | 0.2141 | 0.0772  | 0.0768 | 0.3273 | 17.4981 | 0.6204 | 11.1456 |
| SmallVesselStroke | log_s_Porphyromonas_gingivalis    | Simple mode               | 21 | 0.5307  | 0.4245 | 0.2257 | 0.0772  | 0.0768 | 0.3273 | 17.4981 | 0.6204 | 11.1456 |
| SmallVesselStroke | log_s_Porphyromonas_gingivalis    | Weighted mode             | 21 | 0.5094  | 0.3718 | 0.1858 | 0.0772  | 0.0768 | 0.3273 | 17.4981 | 0.6204 | 11.1456 |
| SmallVesselStroke | log_s_Porphyromonas_uenonis       | MR Egger                  | 21 | 1.0244  | 0.7313 | 0.1774 | -0.1070 | 0.0868 | 0.2330 | 25.3689 | 0.1877 | 1.8609  |
| SmallVesselStroke | log_s_Porphyromonas_uenonis       | Weighted median           | 21 | -0.0353 | 0.2442 | 0.8849 | -0.1070 | 0.0868 | 0.2330 | 25.3689 | 0.1877 | 1.8609  |
| SmallVesselStroke | log_s_Porphyromonas_uenonis       | Inverse variance weighted | 21 | 0.1537  | 0.1903 | 0.4191 | -0.1070 | 0.0868 | 0.2330 | 25.3689 | 0.1877 | 1.8609  |
| SmallVesselStroke | log_s_Porphyromonas_uenonis       | Simple mode               | 21 | 0.5510  | 0.4192 | 0.2035 | -0.1070 | 0.0868 | 0.2330 | 25.3689 | 0.1877 | 1.8609  |

|                   |                                     |                           |    |         |        |        |         |        |        |         |        |        |
|-------------------|-------------------------------------|---------------------------|----|---------|--------|--------|---------|--------|--------|---------|--------|--------|
| SmallVesselStroke | log_s_Porphyromonas_uenonis         | Weighted mode             | 21 | -0.1050 | 0.3668 | 0.7776 | -0.1070 | 0.0868 | 0.2330 | 25.3689 | 0.1877 | 1.8609 |
| SmallVesselStroke | log_s_Prevotella_amnii              | MR Egger                  | 21 | -0.5270 | 0.7156 | 0.4704 | 0.0628  | 0.0849 | 0.4691 | 23.5944 | 0.2122 | 5.0179 |
| SmallVesselStroke | log_s_Prevotella_amnii              | Weighted median           | 21 | 0.0820  | 0.2436 | 0.7366 | 0.0628  | 0.0849 | 0.4691 | 23.5944 | 0.2122 | 5.0179 |
| SmallVesselStroke | log_s_Prevotella_amnii              | Inverse variance weighted | 21 | -0.0162 | 0.1822 | 0.9292 | 0.0628  | 0.0849 | 0.4691 | 23.5944 | 0.2122 | 5.0179 |
| SmallVesselStroke | log_s_Prevotella_amnii              | Simple mode               | 21 | 0.0224  | 0.4661 | 0.9621 | 0.0628  | 0.0849 | 0.4691 | 23.5944 | 0.2122 | 5.0179 |
| SmallVesselStroke | log_s_Prevotella_amnii              | Weighted mode             | 21 | 0.0338  | 0.4351 | 0.9389 | 0.0628  | 0.0849 | 0.4691 | 23.5944 | 0.2122 | 5.0179 |
| SmallVesselStroke | log_s_Prevotella_bryantii           | MR Egger                  | 21 | -0.2027 | 0.6614 | 0.7626 | 0.0469  | 0.0785 | 0.5577 | 20.6059 | 0.3590 | 7.0778 |
| SmallVesselStroke | log_s_Prevotella_bryantii           | Weighted median           | 21 | 0.3302  | 0.2351 | 0.1601 | 0.0469  | 0.0785 | 0.5577 | 20.6059 | 0.3590 | 7.0778 |
| SmallVesselStroke | log_s_Prevotella_bryantii           | Inverse variance weighted | 21 | 0.1787  | 0.1677 | 0.2865 | 0.0469  | 0.0785 | 0.5577 | 20.6059 | 0.3590 | 7.0778 |
| SmallVesselStroke | log_s_Prevotella_bryantii           | Simple mode               | 21 | 0.5229  | 0.4417 | 0.2503 | 0.0469  | 0.0785 | 0.5577 | 20.6059 | 0.3590 | 7.0778 |
| SmallVesselStroke | log_s_Prevotella_bryantii           | Weighted mode             | 21 | 0.4816  | 0.4103 | 0.2543 | 0.0469  | 0.0785 | 0.5577 | 20.6059 | 0.3590 | 7.0778 |
| SmallVesselStroke | log_s_Prevotella_dentalis           | MR Egger                  | 21 | -0.7432 | 0.8226 | 0.3776 | 0.1175  | 0.0977 | 0.2438 | 34.0037 | 0.0261 | 2.3766 |
| SmallVesselStroke | log_s_Prevotella_dentalis           | Weighted median           | 21 | 0.0789  | 0.2370 | 0.7393 | 0.1175  | 0.0977 | 0.2438 | 34.0037 | 0.0261 | 2.3766 |
| SmallVesselStroke | log_s_Prevotella_dentalis           | Inverse variance weighted | 21 | 0.2131  | 0.2139 | 0.3191 | 0.1175  | 0.0977 | 0.2438 | 34.0037 | 0.0261 | 2.3766 |
| SmallVesselStroke | log_s_Prevotella_dentalis           | Simple mode               | 21 | -0.0393 | 0.4383 | 0.9295 | 0.1175  | 0.0977 | 0.2438 | 34.0037 | 0.0261 | 2.3766 |
| SmallVesselStroke | log_s_Prevotella_dentalis           | Weighted mode             | 21 | -0.0393 | 0.3884 | 0.9204 | 0.1175  | 0.0977 | 0.2438 | 34.0037 | 0.0261 | 2.3766 |
| SmallVesselStroke | log_s_Prevotella_marshii            | MR Egger                  | 21 | -0.4938 | 0.8384 | 0.5628 | 0.0544  | 0.0995 | 0.5908 | 32.8525 | 0.0250 | 3.1172 |
| SmallVesselStroke | log_s_Prevotella_marshii            | Weighted median           | 21 | -0.0845 | 0.2568 | 0.7422 | 0.0544  | 0.0995 | 0.5908 | 32.8525 | 0.0250 | 3.1172 |
| SmallVesselStroke | log_s_Prevotella_marshii            | Inverse variance weighted | 21 | -0.0508 | 0.2122 | 0.8110 | 0.0544  | 0.0995 | 0.5908 | 32.8525 | 0.0250 | 3.1172 |
| SmallVesselStroke | log_s_Prevotella_marshii            | Simple mode               | 21 | 0.8033  | 0.6330 | 0.2190 | 0.0544  | 0.0995 | 0.5908 | 32.8525 | 0.0250 | 3.1172 |
| SmallVesselStroke | log_s_Prevotella_marshii            | Weighted mode             | 21 | 0.7697  | 0.5841 | 0.2025 | 0.0544  | 0.0995 | 0.5908 | 32.8525 | 0.0250 | 3.1172 |
| SmallVesselStroke | log_s_Prevotella_melaninogenica     | MR Egger                  | 21 | 0.1327  | 0.7238 | 0.8565 | 0.0139  | 0.0859 | 0.8732 | 24.3936 | 0.1815 | 3.5036 |
| SmallVesselStroke | log_s_Prevotella_melaninogenica     | Weighted median           | 21 | 0.1216  | 0.2465 | 0.6218 | 0.0139  | 0.0859 | 0.8732 | 24.3936 | 0.1815 | 3.5036 |
| SmallVesselStroke | log_s_Prevotella_melaninogenica     | Inverse variance weighted | 21 | 0.2458  | 0.1818 | 0.1764 | 0.0139  | 0.0859 | 0.8732 | 24.3936 | 0.1815 | 3.5036 |
| SmallVesselStroke | log_s_Prevotella_melaninogenica     | Simple mode               | 21 | 0.6567  | 0.5022 | 0.2058 | 0.0139  | 0.0859 | 0.8732 | 24.3936 | 0.1815 | 3.5036 |
| SmallVesselStroke | log_s_Prevotella_melaninogenica     | Weighted mode             | 21 | 0.4436  | 0.4377 | 0.3229 | 0.0139  | 0.0859 | 0.8732 | 24.3936 | 0.1815 | 3.5036 |
| SmallVesselStroke | log_s_Prevotella_multiformis        | MR Egger                  | 21 | 0.4233  | 0.8635 | 0.6296 | -0.0234 | 0.1025 | 0.8216 | 34.6227 | 0.0155 | 4.3301 |
| SmallVesselStroke | log_s_Prevotella_multiformis        | Weighted median           | 21 | 0.2077  | 0.2506 | 0.4073 | -0.0234 | 0.1025 | 0.8216 | 34.6227 | 0.0155 | 4.3301 |
| SmallVesselStroke | log_s_Prevotella_multiformis        | Inverse variance weighted | 21 | 0.2326  | 0.2167 | 0.2830 | -0.0234 | 0.1025 | 0.8216 | 34.6227 | 0.0155 | 4.3301 |
| SmallVesselStroke | log_s_Prevotella_multiformis        | Simple mode               | 21 | 0.1839  | 0.4455 | 0.6841 | -0.0234 | 0.1025 | 0.8216 | 34.6227 | 0.0155 | 4.3301 |
| SmallVesselStroke | log_s_Prevotella_multiformis        | Weighted mode             | 21 | 0.1958  | 0.3915 | 0.6224 | -0.0234 | 0.1025 | 0.8216 | 34.6227 | 0.0155 | 4.3301 |
| SmallVesselStroke | log_s_Prevotella_multisaccharivorax | MR Egger                  | 21 | -0.2656 | 0.8525 | 0.7588 | 0.0388  | 0.1013 | 0.7061 | 33.9280 | 0.0187 | 3.8976 |
| SmallVesselStroke | log_s_Prevotella_multisaccharivorax | Weighted median           | 21 | -0.2427 | 0.2590 | 0.3488 | 0.0388  | 0.1013 | 0.7061 | 33.9280 | 0.0187 | 3.8976 |
| SmallVesselStroke | log_s_Prevotella_multisaccharivorax | Inverse variance weighted | 21 | 0.0498  | 0.2152 | 0.8171 | 0.0388  | 0.1013 | 0.7061 | 33.9280 | 0.0187 | 3.8976 |
| SmallVesselStroke | log_s_Prevotella_multisaccharivorax | Simple mode               | 21 | -0.5825 | 0.6169 | 0.3563 | 0.0388  | 0.1013 | 0.7061 | 33.9280 | 0.0187 | 3.8976 |
| SmallVesselStroke | log_s_Prevotella_multisaccharivorax | Weighted mode             | 21 | -0.5691 | 0.5081 | 0.2760 | 0.0388  | 0.1013 | 0.7061 | 33.9280 | 0.0187 | 3.8976 |
| SmallVesselStroke | log_s_Prevotella_nigrescens         | MR Egger                  | 21 | 0.2004  | 0.6702 | 0.7682 | 0.0011  | 0.0795 | 0.9890 | 20.8358 | 0.3459 | 1.0484 |
| SmallVesselStroke | log_s_Prevotella_nigrescens         | Weighted median           | 21 | 0.1350  | 0.2262 | 0.5506 | 0.0011  | 0.0795 | 0.9890 | 20.8358 | 0.3459 | 1.0484 |
| SmallVesselStroke | log_s_Prevotella_nigrescens         | Inverse variance weighted | 21 | 0.2094  | 0.1676 | 0.2114 | 0.0011  | 0.0795 | 0.9890 | 20.8358 | 0.3459 | 1.0484 |
| SmallVesselStroke | log_s_Prevotella_nigrescens         | Simple mode               | 21 | -0.1360 | 0.4515 | 0.7663 | 0.0011  | 0.0795 | 0.9890 | 20.8358 | 0.3459 | 1.0484 |
| SmallVesselStroke | log_s_Prevotella_nigrescens         | Weighted mode             | 21 | -0.0897 | 0.4705 | 0.8507 | 0.0011  | 0.0795 | 0.9890 | 20.8358 | 0.3459 | 1.0484 |
| SmallVesselStroke | log_s_Prevotella_pallens            | MR Egger                  | 21 | 0.5752  | 0.6450 | 0.3837 | -0.0420 | 0.0766 | 0.5898 | 19.5789 | 0.4203 | 7.4548 |
| SmallVesselStroke | log_s_Prevotella_pallens            | Weighted median           | 21 | 0.1815  | 0.2331 | 0.4362 | -0.0420 | 0.0766 | 0.5898 | 19.5789 | 0.4203 | 7.4548 |
| SmallVesselStroke | log_s_Prevotella_pallens            | Inverse variance weighted | 21 | 0.2334  | 0.1638 | 0.1542 | -0.0420 | 0.0766 | 0.5898 | 19.5789 | 0.4203 | 7.4548 |
| SmallVesselStroke | log_s_Prevotella_pallens            | Simple mode               | 21 | -0.0509 | 0.4027 | 0.9007 | -0.0420 | 0.0766 | 0.5898 | 19.5789 | 0.4203 | 7.4548 |
| SmallVesselStroke | log_s_Prevotella_pallens            | Weighted mode             | 21 | -0.0922 | 0.3711 | 0.8064 | -0.0420 | 0.0766 | 0.5898 | 19.5789 | 0.4203 | 7.4548 |
| SmallVesselStroke | log_s_Prevotella_salivae            | MR Egger                  | 21 | -1.1341 | 0.6736 | 0.1086 | 0.1076  | 0.0799 | 0.1942 | 22.8685 | 0.2953 | 3.3207 |
| SmallVesselStroke | log_s_Prevotella_salivae            | Weighted median           | 21 | -0.2027 | 0.2375 | 0.3934 | 0.1076  | 0.0799 | 0.1942 | 22.8685 | 0.2953 | 3.3207 |
| SmallVesselStroke | log_s_Prevotella_salivae            | Inverse variance weighted | 21 | -0.2578 | 0.1760 | 0.1432 | 0.1076  | 0.0799 | 0.1942 | 22.8685 | 0.2953 | 3.3207 |
| SmallVesselStroke | log_s_Prevotella_salivae            | Simple mode               | 21 | -0.1240 | 0.4740 | 0.7963 | 0.1076  | 0.0799 | 0.1942 | 22.8685 | 0.2953 | 3.3207 |
| SmallVesselStroke | log_s_Prevotella_salivae            | Weighted mode             | 21 | -0.0652 | 0.4159 | 0.8770 | 0.1076  | 0.0799 | 0.1942 | 22.8685 | 0.2953 | 3.3207 |
| SmallVesselStroke | log_s_Prevotella_veroralis          | MR Egger                  | 21 | -0.6871 | 0.7548 | 0.3741 | 0.0616  | 0.0896 | 0.4999 | 26.5344 | 0.1160 | 1.4419 |
| SmallVesselStroke | log_s_Prevotella_veroralis          | Weighted median           | 21 | -0.1464 | 0.2532 | 0.5631 | 0.0616  | 0.0896 | 0.4999 | 26.5344 | 0.1160 | 1.4419 |
| SmallVesselStroke | log_s_Prevotella_veroralis          | Inverse variance weighted | 21 | -0.1854 | 0.1914 | 0.3327 | 0.0616  | 0.0896 | 0.4999 | 26.5344 | 0.1160 | 1.4419 |
| SmallVesselStroke | log_s_Prevotella_veroralis          | Simple mode               | 21 | 0.1059  | 0.4951 | 0.8329 | 0.0616  | 0.0896 | 0.4999 | 26.5344 | 0.1160 | 1.4419 |
| SmallVesselStroke | log_s_Prevotella_veroralis          | Weighted mode             | 21 | 0.0000  | 0.4181 | 1.0000 | 0.0616  | 0.0896 | 0.4999 | 26.5344 | 0.1160 | 1.4419 |
| SmallVesselStroke | log_s_Pseudomonas_stutzeri          | MR Egger                  | 21 | 0.2045  | 0.6394 | 0.7525 | -0.0003 | 0.0759 | 0.9966 | 14.7712 | 0.7370 | 8.0563 |
| SmallVesselStroke | log_s_Pseudomonas_stutzeri          | Weighted median           | 21 | 0.3849  | 0.2232 | 0.0847 | -0.0003 | 0.0759 | 0.9966 | 14.7712 | 0.7370 | 8.0563 |
| SmallVesselStroke | log_s_Pseudomonas_stutzeri          | Inverse variance weighted | 21 | 0.2019  | 0.1647 | 0.2203 | -0.0003 | 0.0759 | 0.9966 | 14.7712 | 0.7370 | 8.0563 |
| SmallVesselStroke | log_s_Pseudomonas_stutzeri          | Simple mode               | 21 | 0.4884  | 0.4530 | 0.2938 | -0.0003 | 0.0759 | 0.9966 | 14.7712 | 0.7370 | 8.0563 |
| SmallVesselStroke | log_s_Pseudomonas_stutzeri          | Weighted mode             | 21 | 0.4805  | 0.4232 | 0.2696 | -0.0003 | 0.0759 | 0.9966 | 14.7712 | 0.7370 | 8.0563 |

|                   |                                      |                           |    |         |        |        |         |        |        |         |        |         |
|-------------------|--------------------------------------|---------------------------|----|---------|--------|--------|---------|--------|--------|---------|--------|---------|
| SmallVesselStroke | log_s_Ruminococcus_flavefaciens      | MR Egger                  | 21 | -0.0138 | 0.6467 | 0.9832 | 0.0060  | 0.0768 | 0.9381 | 17.3448 | 0.5665 | 5.2601  |
| SmallVesselStroke | log_s_Ruminococcus_flavefaciens      | Weighted median           | 21 | 0.1896  | 0.2281 | 0.4059 | 0.0060  | 0.0768 | 0.9381 | 17.3448 | 0.5665 | 5.2601  |
| SmallVesselStroke | log_s_Ruminococcus_flavefaciens      | Inverse variance weighted | 21 | 0.0353  | 0.1664 | 0.8317 | 0.0060  | 0.0768 | 0.9381 | 17.3448 | 0.5665 | 5.2601  |
| SmallVesselStroke | log_s_Ruminococcus_flavefaciens      | Simple mode               | 21 | 0.3042  | 0.4492 | 0.5060 | 0.0060  | 0.0768 | 0.9381 | 17.3448 | 0.5665 | 5.2601  |
| SmallVesselStroke | log_s_Ruminococcus_flavefaciens      | Weighted mode             | 21 | 0.2950  | 0.4464 | 0.5162 | 0.0060  | 0.0768 | 0.9381 | 17.3448 | 0.5665 | 5.2601  |
| SmallVesselStroke | log_s_Serratia_odorifera             | MR Egger                  | 21 | -0.4059 | 0.6341 | 0.5297 | 0.0614  | 0.0753 | 0.4249 | 14.0242 | 0.7823 | 23.5707 |
| SmallVesselStroke | log_s_Serratia_odorifera             | Weighted median           | 21 | 0.1250  | 0.2219 | 0.5734 | 0.0614  | 0.0753 | 0.4249 | 14.0242 | 0.7823 | 23.5707 |
| SmallVesselStroke | log_s_Serratia_odorifera             | Inverse variance weighted | 21 | 0.0937  | 0.1637 | 0.5670 | 0.0614  | 0.0753 | 0.4249 | 14.0242 | 0.7823 | 23.5707 |
| SmallVesselStroke | log_s_Serratia_odorifera             | Simple mode               | 21 | -0.2155 | 0.4308 | 0.6224 | 0.0614  | 0.0753 | 0.4249 | 14.0242 | 0.7823 | 23.5707 |
| SmallVesselStroke | log_s_Serratia_odorifera             | Weighted mode             | 21 | -0.1887 | 0.4160 | 0.6550 | 0.0614  | 0.0753 | 0.4249 | 14.0242 | 0.7823 | 23.5707 |
| SmallVesselStroke | log_s_Shewanella_putrefaciens        | MR Egger                  | 21 | -0.6402 | 0.6577 | 0.3425 | 0.0715  | 0.0781 | 0.3715 | 20.2236 | 0.3812 | 17.0908 |
| SmallVesselStroke | log_s_Shewanella_putrefaciens        | Weighted median           | 21 | -0.0266 | 0.2464 | 0.9141 | 0.0715  | 0.0781 | 0.3715 | 20.2236 | 0.3812 | 17.0908 |
| SmallVesselStroke | log_s_Shewanella_putrefaciens        | Inverse variance weighted | 21 | -0.0586 | 0.1691 | 0.7288 | 0.0715  | 0.0781 | 0.3715 | 20.2236 | 0.3812 | 17.0908 |
| SmallVesselStroke | log_s_Shewanella_putrefaciens        | Simple mode               | 21 | -0.0145 | 0.4706 | 0.9758 | 0.0715  | 0.0781 | 0.3715 | 20.2236 | 0.3812 | 17.0908 |
| SmallVesselStroke | log_s_Shewanella_putrefaciens        | Weighted mode             | 21 | -0.0696 | 0.4350 | 0.8744 | 0.0715  | 0.0781 | 0.3715 | 20.2236 | 0.3812 | 17.0908 |
| SmallVesselStroke | log_s_Slackia_exigua                 | MR Egger                  | 21 | -0.9381 | 0.6460 | 0.1628 | 0.0782  | 0.0767 | 0.3205 | 20.5464 | 0.4243 | 4.6808  |
| SmallVesselStroke | log_s_Slackia_exigua                 | Weighted median           | 21 | -0.3283 | 0.2362 | 0.1645 | 0.0782  | 0.0767 | 0.3205 | 20.5464 | 0.4243 | 4.6808  |
| SmallVesselStroke | log_s_Slackia_exigua                 | Inverse variance weighted | 21 | -0.3013 | 0.1665 | 0.0704 | 0.0782  | 0.0767 | 0.3205 | 20.5464 | 0.4243 | 4.6808  |
| SmallVesselStroke | log_s_Slackia_exigua                 | Simple mode               | 21 | -0.3727 | 0.4646 | 0.4319 | 0.0782  | 0.0767 | 0.3205 | 20.5464 | 0.4243 | 4.6808  |
| SmallVesselStroke | log_s_Slackia_exigua                 | Weighted mode             | 21 | -0.3455 | 0.4581 | 0.4596 | 0.0782  | 0.0767 | 0.3205 | 20.5464 | 0.4243 | 4.6808  |
| SmallVesselStroke | log_s_Staphylococcus_aureus          | MR Egger                  | 21 | -0.4206 | 0.6924 | 0.5508 | 0.0679  | 0.0822 | 0.4195 | 22.4892 | 0.2606 | 5.6392  |
| SmallVesselStroke | log_s_Staphylococcus_aureus          | Weighted median           | 21 | 0.2038  | 0.2352 | 0.3864 | 0.0679  | 0.0822 | 0.4195 | 22.4892 | 0.2606 | 5.6392  |
| SmallVesselStroke | log_s_Staphylococcus_aureus          | Inverse variance weighted | 21 | 0.1316  | 0.1769 | 0.4569 | 0.0679  | 0.0822 | 0.4195 | 22.4892 | 0.2606 | 5.6392  |
| SmallVesselStroke | log_s_Staphylococcus_aureus          | Simple mode               | 21 | 0.1874  | 0.4024 | 0.6464 | 0.0679  | 0.0822 | 0.4195 | 22.4892 | 0.2606 | 5.6392  |
| SmallVesselStroke | log_s_Staphylococcus_aureus          | Weighted mode             | 21 | 0.1874  | 0.4147 | 0.6561 | 0.0679  | 0.0822 | 0.4195 | 22.4892 | 0.2606 | 5.6392  |
| SmallVesselStroke | log_s_Streptococcus_constellatus     | MR Egger                  | 21 | 0.0634  | 0.6374 | 0.9218 | -0.0294 | 0.0757 | 0.7016 | 14.8734 | 0.7306 | 10.2105 |
| SmallVesselStroke | log_s_Streptococcus_constellatus     | Weighted median           | 21 | -0.2628 | 0.2263 | 0.2456 | -0.0294 | 0.0757 | 0.7016 | 14.8734 | 0.7306 | 10.2105 |
| SmallVesselStroke | log_s_Streptococcus_constellatus     | Inverse variance weighted | 21 | -0.1762 | 0.1642 | 0.2832 | -0.0294 | 0.0757 | 0.7016 | 14.8734 | 0.7306 | 10.2105 |
| SmallVesselStroke | log_s_Streptococcus_constellatus     | Simple mode               | 21 | -0.2657 | 0.4002 | 0.5144 | -0.0294 | 0.0757 | 0.7016 | 14.8734 | 0.7306 | 10.2105 |
| SmallVesselStroke | log_s_Streptococcus_constellatus     | Weighted mode             | 21 | -0.2348 | 0.4085 | 0.5718 | -0.0294 | 0.0757 | 0.7016 | 14.8734 | 0.7306 | 10.2105 |
| SmallVesselStroke | log_s_Streptococcus_cristatus        | MR Egger                  | 21 | 0.3141  | 0.6678 | 0.6434 | -0.0243 | 0.0792 | 0.7626 | 20.4868 | 0.3658 | 4.1557  |
| SmallVesselStroke | log_s_Streptococcus_cristatus        | Weighted median           | 21 | 0.0040  | 0.2353 | 0.9863 | -0.0243 | 0.0792 | 0.7626 | 20.4868 | 0.3658 | 4.1557  |
| SmallVesselStroke | log_s_Streptococcus_cristatus        | Inverse variance weighted | 21 | 0.1163  | 0.1664 | 0.4847 | -0.0243 | 0.0792 | 0.7626 | 20.4868 | 0.3658 | 4.1557  |
| SmallVesselStroke | log_s_Streptococcus_cristatus        | Simple mode               | 21 | -0.0003 | 0.4176 | 0.9995 | -0.0243 | 0.0792 | 0.7626 | 20.4868 | 0.3658 | 4.1557  |
| SmallVesselStroke | log_s_Streptococcus_cristatus        | Weighted mode             | 21 | -0.0617 | 0.4361 | 0.8889 | -0.0243 | 0.0792 | 0.7626 | 20.4868 | 0.3658 | 4.1557  |
| SmallVesselStroke | log_s_Streptococcus_peroris          | MR Egger                  | 21 | -0.8402 | 0.7363 | 0.2680 | 0.0962  | 0.0873 | 0.2842 | 26.4790 | 0.1506 | 14.8581 |
| SmallVesselStroke | log_s_Streptococcus_peroris          | Weighted median           | 21 | 0.0660  | 0.2504 | 0.7922 | 0.0962  | 0.0873 | 0.2842 | 26.4790 | 0.1506 | 14.8581 |
| SmallVesselStroke | log_s_Streptococcus_peroris          | Inverse variance weighted | 21 | -0.0557 | 0.1892 | 0.7687 | 0.0962  | 0.0873 | 0.2842 | 26.4790 | 0.1506 | 14.8581 |
| SmallVesselStroke | log_s_Streptococcus_peroris          | Simple mode               | 21 | 0.0508  | 0.4071 | 0.9019 | 0.0962  | 0.0873 | 0.2842 | 26.4790 | 0.1506 | 14.8581 |
| SmallVesselStroke | log_s_Streptococcus_peroris          | Weighted mode             | 21 | 0.1209  | 0.3475 | 0.7316 | 0.0962  | 0.0873 | 0.2842 | 26.4790 | 0.1506 | 14.8581 |
| SmallVesselStroke | log_s_Streptococcus_pseudopneumoniae | MR Egger                  | 21 | -0.0123 | 0.6381 | 0.9848 | -0.0185 | 0.0758 | 0.8100 | 16.1192 | 0.6493 | 12.4034 |
| SmallVesselStroke | log_s_Streptococcus_pseudopneumoniae | Weighted median           | 21 | -0.1575 | 0.2262 | 0.4862 | -0.0185 | 0.0758 | 0.8100 | 16.1192 | 0.6493 | 12.4034 |
| SmallVesselStroke | log_s_Streptococcus_pseudopneumoniae | Inverse variance weighted | 21 | -0.1627 | 0.1644 | 0.3224 | -0.0185 | 0.0758 | 0.8100 | 16.1192 | 0.6493 | 12.4034 |
| SmallVesselStroke | log_s_Streptococcus_pseudopneumoniae | Simple mode               | 21 | -0.3201 | 0.4443 | 0.4796 | -0.0185 | 0.0758 | 0.8100 | 16.1192 | 0.6493 | 12.4034 |
| SmallVesselStroke | log_s_Streptococcus_pseudopneumoniae | Weighted mode             | 21 | -0.3914 | 0.4078 | 0.3487 | -0.0185 | 0.0758 | 0.8100 | 16.1192 | 0.6493 | 12.4034 |
| SmallVesselStroke | log_s_Succinatimonas_hippe           | MR Egger                  | 21 | -0.4031 | 0.7669 | 0.6053 | 0.0585  | 0.0911 | 0.5286 | 27.5645 | 0.0922 | 2.9271  |
| SmallVesselStroke | log_s_Succinatimonas_hippe           | Weighted median           | 21 | 0.1834  | 0.2500 | 0.4631 | 0.0585  | 0.0911 | 0.5286 | 27.5645 | 0.0922 | 2.9271  |
| SmallVesselStroke | log_s_Succinatimonas_hippe           | Inverse variance weighted | 21 | 0.0727  | 0.1947 | 0.7090 | 0.0585  | 0.0911 | 0.5286 | 27.5645 | 0.0922 | 2.9271  |
| SmallVesselStroke | log_s_Succinatimonas_hippe           | Simple mode               | 21 | 0.5882  | 0.5449 | 0.2932 | 0.0585  | 0.0911 | 0.5286 | 27.5645 | 0.0922 | 2.9271  |
| SmallVesselStroke | log_s_Succinatimonas_hippe           | Weighted mode             | 21 | 0.4169  | 0.4827 | 0.3981 | 0.0585  | 0.0911 | 0.5286 | 27.5645 | 0.0922 | 2.9271  |
| SmallVesselStroke | log_s_Turicibacter_sanguinis         | MR Egger                  | 21 | -0.3930 | 0.6406 | 0.5468 | 0.0368  | 0.0761 | 0.6340 | 19.3314 | 0.4358 | 15.6982 |
| SmallVesselStroke | log_s_Turicibacter_sanguinis         | Weighted median           | 21 | -0.0588 | 0.2364 | 0.8037 | 0.0368  | 0.0761 | 0.6340 | 19.3314 | 0.4358 | 15.6982 |
| SmallVesselStroke | log_s_Turicibacter_sanguinis         | Inverse variance weighted | 21 | -0.0935 | 0.1639 | 0.5681 | 0.0368  | 0.0761 | 0.6340 | 19.3314 | 0.4358 | 15.6982 |
| SmallVesselStroke | log_s_Turicibacter_sanguinis         | Simple mode               | 21 | -0.0532 | 0.4101 | 0.8981 | 0.0368  | 0.0761 | 0.6340 | 19.3314 | 0.4358 | 15.6982 |
| SmallVesselStroke | log_s_Turicibacter_sanguinis         | Weighted mode             | 21 | 0.0035  | 0.3696 | 0.9926 | 0.0368  | 0.0761 | 0.6340 | 19.3314 | 0.4358 | 15.6982 |
| SmallVesselStroke | log_s_Vibrio_cholerae                | MR Egger                  | 21 | 0.9031  | 0.6975 | 0.2109 | -0.1176 | 0.0828 | 0.1716 | 25.0253 | 0.2005 | 1.7062  |
| SmallVesselStroke | log_s_Vibrio_cholerae                | Weighted median           | 21 | 0.2538  | 0.2363 | 0.2827 | -0.1176 | 0.0828 | 0.1716 | 25.0253 | 0.2005 | 1.7062  |
| SmallVesselStroke | log_s_Vibrio_cholerae                | Inverse variance weighted | 21 | -0.0545 | 0.1835 | 0.7665 | -0.1176 | 0.0828 | 0.1716 | 25.0253 | 0.2005 | 1.7062  |
| SmallVesselStroke | log_s_Vibrio_cholerae                | Simple mode               | 21 | 0.3745  | 0.4460 | 0.4110 | -0.1176 | 0.0828 | 0.1716 | 25.0253 | 0.2005 | 1.7062  |
| SmallVesselStroke | log_s_Vibrio_cholerae                | Weighted mode             | 21 | 0.3869  | 0.3995 | 0.3444 | -0.1176 | 0.0828 | 0.1716 | 25.0253 | 0.2005 | 1.7062  |
| SmallVesselStroke | log_s_Vibrio_furnissii               | MR Egger                  | 21 | -0.3552 | 0.6352 | 0.5825 | 0.0606  | 0.0755 | 0.4316 | 15.6255 | 0.6821 | 11.2623 |

|                   |                                         |                           |    |         |        |        |         |        |        |         |        |          |
|-------------------|-----------------------------------------|---------------------------|----|---------|--------|--------|---------|--------|--------|---------|--------|----------|
| SmallVesselStroke | log_s_Vibrio_furnissii                  | Weighted median           | 21 | 0.1012  | 0.2268 | 0.6553 | 0.0606  | 0.0755 | 0.4316 | 15.6255 | 0.6821 | 11.2623  |
| SmallVesselStroke | log_s_Vibrio_furnissii                  | Inverse variance weighted | 21 | 0.1380  | 0.1638 | 0.3995 | 0.0606  | 0.0755 | 0.4316 | 15.6255 | 0.6821 | 11.2623  |
| SmallVesselStroke | log_s_Vibrio_furnissii                  | Simple mode               | 21 | -0.0483 | 0.4128 | 0.9080 | 0.0606  | 0.0755 | 0.4316 | 15.6255 | 0.6821 | 11.2623  |
| SmallVesselStroke | log_s_Vibrio_furnissii                  | Weighted mode             | 21 | -0.0483 | 0.3939 | 0.9037 | 0.0606  | 0.0755 | 0.4316 | 15.6255 | 0.6821 | 11.2623  |
| SmallVesselStroke | log_s_unclassified_Streptococcus_oralis | MR Egger                  | 21 | 1.0394  | 0.6588 | 0.1311 | -0.1117 | 0.0782 | 0.1691 | 22.0480 | 0.3379 | 1.3500   |
| SmallVesselStroke | log_s_unclassified_Streptococcus_oralis | Weighted median           | 21 | 0.3012  | 0.2290 | 0.1884 | -0.1117 | 0.0782 | 0.1691 | 22.0480 | 0.3379 | 1.3500   |
| SmallVesselStroke | log_s_unclassified_Streptococcus_oralis | Inverse variance weighted | 21 | 0.1290  | 0.1728 | 0.4553 | -0.1117 | 0.0782 | 0.1691 | 22.0480 | 0.3379 | 1.3500   |
| SmallVesselStroke | log_s_unclassified_Streptococcus_oralis | Simple mode               | 21 | 0.3835  | 0.3956 | 0.3439 | -0.1117 | 0.0782 | 0.1691 | 22.0480 | 0.3379 | 1.3500   |
| SmallVesselStroke | log_s_unclassified_Streptococcus_oralis | Weighted mode             | 21 | 0.3835  | 0.3919 | 0.3395 | -0.1117 | 0.0782 | 0.1691 | 22.0480 | 0.3379 | 1.3500   |
| SmallVesselStroke | o_Actinomycetales                       | MR Egger                  | 21 | -0.1849 | 0.2462 | 0.4620 | 0.0106  | 0.0293 | 0.7210 | 14.4721 | 0.7555 | 65.8629  |
| SmallVesselStroke | o_Actinomycetales                       | Weighted median           | 21 | -0.1520 | 0.0887 | 0.0867 | 0.0106  | 0.0293 | 0.7210 | 14.4721 | 0.7555 | 65.8629  |
| SmallVesselStroke | o_Actinomycetales                       | Inverse variance weighted | 21 | -0.0986 | 0.0636 | 0.1207 | 0.0106  | 0.0293 | 0.7210 | 14.4721 | 0.7555 | 65.8629  |
| SmallVesselStroke | o_Actinomycetales                       | Simple mode               | 21 | -0.2511 | 0.1620 | 0.1367 | 0.0106  | 0.0293 | 0.7210 | 14.4721 | 0.7555 | 65.8629  |
| SmallVesselStroke | o_Actinomycetales                       | Weighted mode             | 21 | -0.2453 | 0.1583 | 0.1368 | 0.0106  | 0.0293 | 0.7210 | 14.4721 | 0.7555 | 65.8629  |
| SmallVesselStroke | o_Bacillales                            | MR Egger                  | 21 | 0.0247  | 0.3049 | 0.9362 | -0.0132 | 0.0362 | 0.7200 | 29.8687 | 0.0535 | 53.8843  |
| SmallVesselStroke | o_Bacillales                            | Weighted median           | 21 | -0.0956 | 0.0957 | 0.3176 | -0.0132 | 0.0362 | 0.7200 | 29.8687 | 0.0535 | 53.8843  |
| SmallVesselStroke | o_Bacillales                            | Inverse variance weighted | 21 | -0.0825 | 0.0770 | 0.2840 | -0.0132 | 0.0362 | 0.7200 | 29.8687 | 0.0535 | 53.8843  |
| SmallVesselStroke | o_Bacillales                            | Simple mode               | 21 | -0.3341 | 0.1994 | 0.1094 | -0.0132 | 0.0362 | 0.7200 | 29.8687 | 0.0535 | 53.8843  |
| SmallVesselStroke | o_Bacillales                            | Weighted mode             | 21 | -0.2875 | 0.1900 | 0.1458 | -0.0132 | 0.0362 | 0.7200 | 29.8687 | 0.0535 | 53.8843  |
| SmallVesselStroke | o_Campylobacteriales                    | MR Egger                  | 21 | 0.2228  | 0.3875 | 0.5721 | -0.0193 | 0.0460 | 0.6796 | 22.8721 | 0.2430 | 31.7836  |
| SmallVesselStroke | o_Campylobacteriales                    | Weighted median           | 21 | 0.1498  | 0.1281 | 0.2423 | -0.0193 | 0.0460 | 0.6796 | 22.8721 | 0.2430 | 31.7836  |
| SmallVesselStroke | o_Campylobacteriales                    | Inverse variance weighted | 21 | 0.0658  | 0.0979 | 0.5018 | -0.0193 | 0.0460 | 0.6796 | 22.8721 | 0.2430 | 31.7836  |
| SmallVesselStroke | o_Campylobacteriales                    | Simple mode               | 21 | 0.3430  | 0.2610 | 0.2036 | -0.0193 | 0.0460 | 0.6796 | 22.8721 | 0.2430 | 31.7836  |
| SmallVesselStroke | o_Campylobacteriales                    | Weighted mode             | 21 | 0.2348  | 0.2215 | 0.3018 | -0.0193 | 0.0460 | 0.6796 | 22.8721 | 0.2430 | 31.7836  |
| SmallVesselStroke | o_Clostridiales                         | MR Egger                  | 21 | 0.2020  | 0.1970 | 0.3181 | -0.0196 | 0.0234 | 0.4130 | 15.1183 | 0.7150 | 155.7263 |
| SmallVesselStroke | o_Clostridiales                         | Weighted median           | 21 | 0.0317  | 0.0697 | 0.6498 | -0.0196 | 0.0234 | 0.4130 | 15.1183 | 0.7150 | 155.7263 |
| SmallVesselStroke | o_Clostridiales                         | Inverse variance weighted | 21 | 0.0427  | 0.0508 | 0.4011 | -0.0196 | 0.0234 | 0.4130 | 15.1183 | 0.7150 | 155.7263 |
| SmallVesselStroke | o_Clostridiales                         | Simple mode               | 21 | 0.0273  | 0.1392 | 0.8465 | -0.0196 | 0.0234 | 0.4130 | 15.1183 | 0.7150 | 155.7263 |
| SmallVesselStroke | o_Clostridiales                         | Weighted mode             | 21 | 0.0545  | 0.1483 | 0.7173 | -0.0196 | 0.0234 | 0.4130 | 15.1183 | 0.7150 | 155.7263 |
| SmallVesselStroke | o_Erysipelotrichales                    | MR Egger                  | 21 | 0.0575  | 0.2354 | 0.8095 | -0.0077 | 0.0280 | 0.7855 | 11.5206 | 0.9051 | 188.6934 |
| SmallVesselStroke | o_Erysipelotrichales                    | Weighted median           | 21 | 0.0088  | 0.0822 | 0.9144 | -0.0077 | 0.0280 | 0.7855 | 11.5206 | 0.9051 | 188.6934 |
| SmallVesselStroke | o_Erysipelotrichales                    | Inverse variance weighted | 21 | -0.0052 | 0.0607 | 0.9314 | -0.0077 | 0.0280 | 0.7855 | 11.5206 | 0.9051 | 188.6934 |
| SmallVesselStroke | o_Erysipelotrichales                    | Simple mode               | 21 | 0.0137  | 0.1228 | 0.9120 | -0.0077 | 0.0280 | 0.7855 | 11.5206 | 0.9051 | 188.6934 |
| SmallVesselStroke | o_Erysipelotrichales                    | Weighted mode             | 21 | 0.0201  | 0.1246 | 0.8732 | -0.0077 | 0.0280 | 0.7855 | 11.5206 | 0.9051 | 188.6934 |
| SmallVesselStroke | o_Pasteurellales                        | MR Egger                  | 21 | -0.9714 | 0.5825 | 0.1118 | 0.1324  | 0.0692 | 0.0710 | 23.0926 | 0.2843 | 12.0794  |
| SmallVesselStroke | o_Pasteurellales                        | Weighted median           | 21 | 0.0290  | 0.2139 | 0.8922 | 0.1324  | 0.0692 | 0.0710 | 23.0926 | 0.2843 | 12.0794  |
| SmallVesselStroke | o_Pasteurellales                        | Inverse variance weighted | 21 | 0.1050  | 0.1600 | 0.5117 | 0.1324  | 0.0692 | 0.0710 | 23.0926 | 0.2843 | 12.0794  |
| SmallVesselStroke | o_Pasteurellales                        | Simple mode               | 21 | 0.0074  | 0.3391 | 0.9827 | 0.1324  | 0.0692 | 0.0710 | 23.0926 | 0.2843 | 12.0794  |
| SmallVesselStroke | o_Pasteurellales                        | Weighted mode             | 21 | 0.0266  | 0.3841 | 0.9455 | 0.1324  | 0.0692 | 0.0710 | 23.0926 | 0.2843 | 12.0794  |
| SmallVesselStroke | o_Pseudomonadales                       | MR Egger                  | 21 | 0.2527  | 0.6808 | 0.7146 | -0.0116 | 0.0809 | 0.8879 | 14.2978 | 0.7661 | 15.3083  |
| SmallVesselStroke | o_Pseudomonadales                       | Weighted median           | 21 | 0.1359  | 0.2433 | 0.5764 | -0.0116 | 0.0809 | 0.8879 | 14.2978 | 0.7661 | 15.3083  |
| SmallVesselStroke | o_Pseudomonadales                       | Inverse variance weighted | 21 | 0.1587  | 0.1757 | 0.3663 | -0.0116 | 0.0809 | 0.8879 | 14.2978 | 0.7661 | 15.3083  |
| SmallVesselStroke | o_Pseudomonadales                       | Simple mode               | 21 | -0.2963 | 0.4748 | 0.5396 | -0.0116 | 0.0809 | 0.8879 | 14.2978 | 0.7661 | 15.3083  |
| SmallVesselStroke | o_Pseudomonadales                       | Weighted mode             | 21 | -0.2510 | 0.4553 | 0.5876 | -0.0116 | 0.0809 | 0.8879 | 14.2978 | 0.7661 | 15.3083  |
| SmallVesselStroke | o_Spirochaetales                        | MR Egger                  | 21 | 0.0225  | 0.3363 | 0.9474 | 0.0021  | 0.0400 | 0.9582 | 18.3712 | 0.4978 | 61.5915  |
| SmallVesselStroke | o_Spirochaetales                        | Weighted median           | 21 | -0.0344 | 0.1195 | 0.7732 | 0.0021  | 0.0400 | 0.9582 | 18.3712 | 0.4978 | 61.5915  |
| SmallVesselStroke | o_Spirochaetales                        | Inverse variance weighted | 21 | 0.0398  | 0.0868 | 0.6469 | 0.0021  | 0.0400 | 0.9582 | 18.3712 | 0.4978 | 61.5915  |
| SmallVesselStroke | o_Spirochaetales                        | Simple mode               | 21 | -0.1848 | 0.2128 | 0.3954 | 0.0021  | 0.0400 | 0.9582 | 18.3712 | 0.4978 | 61.5915  |
| SmallVesselStroke | o_Spirochaetales                        | Weighted mode             | 21 | -0.1493 | 0.2085 | 0.4822 | 0.0021  | 0.0400 | 0.9582 | 18.3712 | 0.4978 | 61.5915  |
| SmallVesselStroke | p_Lentisphaerae                         | MR Egger                  | 21 | 0.2967  | 0.9006 | 0.7454 | -0.0690 | 0.1070 | 0.5265 | 21.8096 | 0.2938 | 5.6359   |
| SmallVesselStroke | p_Lentisphaerae                         | Weighted median           | 21 | -0.3436 | 0.2998 | 0.2518 | -0.0690 | 0.1070 | 0.5265 | 21.8096 | 0.2938 | 5.6359   |
| SmallVesselStroke | p_Lentisphaerae                         | Inverse variance weighted | 21 | -0.2647 | 0.2290 | 0.2478 | -0.0690 | 0.1070 | 0.5265 | 21.8096 | 0.2938 | 5.6359   |
| SmallVesselStroke | p_Lentisphaerae                         | Simple mode               | 21 | -0.3507 | 0.4935 | 0.4855 | -0.0690 | 0.1070 | 0.5265 | 21.8096 | 0.2938 | 5.6359   |
| SmallVesselStroke | p_Lentisphaerae                         | Weighted mode             | 21 | -0.2807 | 0.4612 | 0.5496 | -0.0690 | 0.1070 | 0.5265 | 21.8096 | 0.2938 | 5.6359   |
| SmallVesselStroke | p_Proteobacteria                        | MR Egger                  | 21 | -0.0922 | 0.3101 | 0.7694 | 0.0134  | 0.0368 | 0.7205 | 19.4489 | 0.4284 | 61.9961  |
| SmallVesselStroke | p_Proteobacteria                        | Weighted median           | 21 | 0.1173  | 0.1105 | 0.2888 | 0.0134  | 0.0368 | 0.7205 | 19.4489 | 0.4284 | 61.9961  |
| SmallVesselStroke | p_Proteobacteria                        | Inverse variance weighted | 21 | 0.0166  | 0.0791 | 0.8339 | 0.0134  | 0.0368 | 0.7205 | 19.4489 | 0.4284 | 61.9961  |
| SmallVesselStroke | p_Proteobacteria                        | Simple mode               | 21 | 0.1243  | 0.2167 | 0.5727 | 0.0134  | 0.0368 | 0.7205 | 19.4489 | 0.4284 | 61.9961  |
| SmallVesselStroke | p_Proteobacteria                        | Weighted mode             | 21 | 0.1287  | 0.1974 | 0.5219 | 0.0134  | 0.0368 | 0.7205 | 19.4489 | 0.4284 | 61.9961  |
| SmallVesselStroke | p_Synergistetes                         | MR Egger                  | 21 | -0.3849 | 0.9888 | 0.7014 | 0.0274  | 0.1175 | 0.8184 | 31.0182 | 0.0402 | 1.4484   |
| SmallVesselStroke | p_Synergistetes                         | Weighted median           | 21 | -0.3762 | 0.2977 | 0.2063 | 0.0274  | 0.1175 | 0.8184 | 31.0182 | 0.0402 | 1.4484   |

|                   |                              |                           |    |         |        |        |         |        |        |         |        |           |
|-------------------|------------------------------|---------------------------|----|---------|--------|--------|---------|--------|--------|---------|--------|-----------|
| SmallVesselStroke | p_Synergistetes              | Inverse variance weighted | 21 | -0.1625 | 0.2490 | 0.5142 | 0.0274  | 0.1175 | 0.8184 | 31.0182 | 0.0402 | 1.4484    |
| SmallVesselStroke | p_Synergistetes              | Simple mode               | 21 | -0.6174 | 0.6091 | 0.3229 | 0.0274  | 0.1175 | 0.8184 | 31.0182 | 0.0402 | 1.4484    |
| SmallVesselStroke | p_Synergistetes              | Weighted mode             | 21 | -0.4977 | 0.5676 | 0.3910 | 0.0274  | 0.1175 | 0.8184 | 31.0182 | 0.0402 | 1.4484    |
| SmallVesselStroke | p_Verrucomicrobia            | MR Egger                  | 21 | -0.5642 | 1.2792 | 0.6641 | 0.0628  | 0.1520 | 0.6843 | 30.8834 | 0.0416 | -367.3131 |
| SmallVesselStroke | p_Verrucomicrobia            | Weighted median           | 21 | -0.1039 | 0.3808 | 0.7850 | 0.0628  | 0.1520 | 0.6843 | 30.8834 | 0.0416 | -367.3131 |
| SmallVesselStroke | p_Verrucomicrobia            | Inverse variance weighted | 21 | -0.0539 | 0.3232 | 0.8677 | 0.0628  | 0.1520 | 0.6843 | 30.8834 | 0.0416 | -367.3131 |
| SmallVesselStroke | p_Verrucomicrobia            | Simple mode               | 21 | -0.0861 | 0.8390 | 0.9193 | 0.0628  | 0.1520 | 0.6843 | 30.8834 | 0.0416 | -367.3131 |
| SmallVesselStroke | p_Verrucomicrobia            | Weighted mode             | 21 | -0.2368 | 0.7078 | 0.7415 | 0.0628  | 0.1520 | 0.6843 | 30.8834 | 0.0416 | -367.3131 |
| SmallVesselStroke | s_Acidaminococcus_fermentans | MR Egger                  | 21 | 0.7520  | 0.6464 | 0.2591 | -0.0962 | 0.0768 | 0.2258 | 38.1712 | 0.0084 | 4.9078    |
| SmallVesselStroke | s_Acidaminococcus_fermentans | Weighted median           | 21 | -0.0746 | 0.1853 | 0.6871 | -0.0962 | 0.0768 | 0.2258 | 38.1712 | 0.0084 | 4.9078    |
| SmallVesselStroke | s_Acidaminococcus_fermentans | Inverse variance weighted | 21 | -0.0298 | 0.1693 | 0.8600 | -0.0962 | 0.0768 | 0.2258 | 38.1712 | 0.0084 | 4.9078    |
| SmallVesselStroke | s_Acidaminococcus_fermentans | Simple mode               | 21 | -0.0148 | 0.3443 | 0.9660 | -0.0962 | 0.0768 | 0.2258 | 38.1712 | 0.0084 | 4.9078    |
| SmallVesselStroke | s_Acidaminococcus_fermentans | Weighted mode             | 21 | -0.0805 | 0.3053 | 0.7947 | -0.0962 | 0.0768 | 0.2258 | 38.1712 | 0.0084 | 4.9078    |
| SmallVesselStroke | s_Actinomyces_odontolyticus  | MR Egger                  | 21 | 0.1243  | 0.4182 | 0.7696 | -0.0058 | 0.0497 | 0.9077 | 19.0522 | 0.4535 | 29.9303   |
| SmallVesselStroke | s_Actinomyces_odontolyticus  | Weighted median           | 21 | -0.1243 | 0.1629 | 0.4455 | -0.0058 | 0.0497 | 0.9077 | 19.0522 | 0.4535 | 29.9303   |
| SmallVesselStroke | s_Actinomyces_odontolyticus  | Inverse variance weighted | 21 | 0.0768  | 0.1078 | 0.4762 | -0.0058 | 0.0497 | 0.9077 | 19.0522 | 0.4535 | 29.9303   |
| SmallVesselStroke | s_Actinomyces_odontolyticus  | Simple mode               | 21 | -0.1883 | 0.3067 | 0.5460 | -0.0058 | 0.0497 | 0.9077 | 19.0522 | 0.4535 | 29.9303   |
| SmallVesselStroke | s_Actinomyces_odontolyticus  | Weighted mode             | 21 | -0.1753 | 0.2690 | 0.5222 | -0.0058 | 0.0497 | 0.9077 | 19.0522 | 0.4535 | 29.9303   |
| SmallVesselStroke | s_Actinomyces_viscosus       | MR Egger                  | 21 | -0.0217 | 0.4355 | 0.9608 | -0.0035 | 0.0517 | 0.9475 | 26.1209 | 0.1269 | 39.4114   |
| SmallVesselStroke | s_Actinomyces_viscosus       | Weighted median           | 21 | -0.0964 | 0.1447 | 0.5054 | -0.0035 | 0.0517 | 0.9475 | 26.1209 | 0.1269 | 39.4114   |
| SmallVesselStroke | s_Actinomyces_viscosus       | Inverse variance weighted | 21 | -0.0498 | 0.1095 | 0.6495 | -0.0035 | 0.0517 | 0.9475 | 26.1209 | 0.1269 | 39.4114   |
| SmallVesselStroke | s_Actinomyces_viscosus       | Simple mode               | 21 | 0.0052  | 0.2761 | 0.9851 | -0.0035 | 0.0517 | 0.9475 | 26.1209 | 0.1269 | 39.4114   |
| SmallVesselStroke | s_Actinomyces_viscosus       | Weighted mode             | 21 | -0.1443 | 0.2686 | 0.5970 | -0.0035 | 0.0517 | 0.9475 | 26.1209 | 0.1269 | 39.4114   |
| SmallVesselStroke | s_Akkermansia_muciniphila    | MR Egger                  | 21 | -0.3317 | 1.2287 | 0.7901 | 0.0325  | 0.1460 | 0.8261 | 25.7866 | 0.1362 | -16.8690  |
| SmallVesselStroke | s_Akkermansia_muciniphila    | Weighted median           | 21 | -0.1662 | 0.4181 | 0.6910 | 0.0325  | 0.1460 | 0.8261 | 25.7866 | 0.1362 | -16.8690  |
| SmallVesselStroke | s_Akkermansia_muciniphila    | Inverse variance weighted | 21 | -0.0673 | 0.3095 | 0.8278 | 0.0325  | 0.1460 | 0.8261 | 25.7866 | 0.1362 | -16.8690  |
| SmallVesselStroke | s_Akkermansia_muciniphila    | Simple mode               | 21 | 0.0248  | 0.7911 | 0.9753 | 0.0325  | 0.1460 | 0.8261 | 25.7866 | 0.1362 | -16.8690  |
| SmallVesselStroke | s_Akkermansia_muciniphila    | Weighted mode             | 21 | -0.0684 | 0.7158 | 0.9249 | 0.0325  | 0.1460 | 0.8261 | 25.7866 | 0.1362 | -16.8690  |
| SmallVesselStroke | s_Alistipes_shahii           | MR Egger                  | 21 | 0.2494  | 0.5635 | 0.6631 | -0.0240 | 0.0669 | 0.7234 | 22.6648 | 0.2524 | 6.4404    |
| SmallVesselStroke | s_Alistipes_shahii           | Weighted median           | 21 | 0.0459  | 0.1840 | 0.8031 | -0.0240 | 0.0669 | 0.7234 | 22.6648 | 0.2524 | 6.4404    |
| SmallVesselStroke | s_Alistipes_shahii           | Inverse variance weighted | 21 | 0.0538  | 0.1422 | 0.7052 | -0.0240 | 0.0669 | 0.7234 | 22.6648 | 0.2524 | 6.4404    |
| SmallVesselStroke | s_Alistipes_shahii           | Simple mode               | 21 | 0.1256  | 0.3851 | 0.7476 | -0.0240 | 0.0669 | 0.7234 | 22.6648 | 0.2524 | 6.4404    |
| SmallVesselStroke | s_Alistipes_shahii           | Weighted mode             | 21 | 0.0539  | 0.3071 | 0.8625 | -0.0240 | 0.0669 | 0.7234 | 22.6648 | 0.2524 | 6.4404    |
| SmallVesselStroke | s_Bacteroides_caccae         | MR Egger                  | 21 | 0.0663  | 0.5972 | 0.9128 | 0.0018  | 0.0710 | 0.9802 | 23.0298 | 0.2360 | 19.7824   |
| SmallVesselStroke | s_Bacteroides_caccae         | Weighted median           | 21 | -0.0990 | 0.2075 | 0.6332 | 0.0018  | 0.0710 | 0.9802 | 23.0298 | 0.2360 | 19.7824   |
| SmallVesselStroke | s_Bacteroides_caccae         | Inverse variance weighted | 21 | 0.0808  | 0.1502 | 0.5904 | 0.0018  | 0.0710 | 0.9802 | 23.0298 | 0.2360 | 19.7824   |
| SmallVesselStroke | s_Bacteroides_caccae         | Simple mode               | 21 | -0.1132 | 0.4298 | 0.7949 | 0.0018  | 0.0710 | 0.9802 | 23.0298 | 0.2360 | 19.7824   |
| SmallVesselStroke | s_Bacteroides_caccae         | Weighted mode             | 21 | -0.1406 | 0.4205 | 0.7416 | 0.0018  | 0.0710 | 0.9802 | 23.0298 | 0.2360 | 19.7824   |
| SmallVesselStroke | s_Bacteroides_clarus         | MR Egger                  | 21 | 0.0139  | 0.6577 | 0.9834 | 0.0057  | 0.0781 | 0.9427 | 33.5489 | 0.0208 | 2.9329    |
| SmallVesselStroke | s_Bacteroides_clarus         | Weighted median           | 21 | -0.0512 | 0.1896 | 0.7870 | 0.0057  | 0.0781 | 0.9427 | 33.5489 | 0.0208 | 2.9329    |
| SmallVesselStroke | s_Bacteroides_clarus         | Inverse variance weighted | 21 | 0.0602  | 0.1655 | 0.7162 | 0.0057  | 0.0781 | 0.9427 | 33.5489 | 0.0208 | 2.9329    |
| SmallVesselStroke | s_Bacteroides_clarus         | Simple mode               | 21 | -0.1457 | 0.4086 | 0.7252 | 0.0057  | 0.0781 | 0.9427 | 33.5489 | 0.0208 | 2.9329    |
| SmallVesselStroke | s_Bacteroides_clarus         | Weighted mode             | 21 | -0.1457 | 0.3713 | 0.6990 | 0.0057  | 0.0781 | 0.9427 | 33.5489 | 0.0208 | 2.9329    |
| SmallVesselStroke | s_Bacteroides_coprocola      | MR Egger                  | 21 | -0.5693 | 0.6124 | 0.3642 | 0.0631  | 0.0728 | 0.3966 | 21.3683 | 0.3168 | 4.2721    |
| SmallVesselStroke | s_Bacteroides_coprocola      | Weighted median           | 21 | -0.0146 | 0.2185 | 0.9466 | 0.0631  | 0.0728 | 0.3966 | 21.3683 | 0.3168 | 4.2721    |
| SmallVesselStroke | s_Bacteroides_coprocola      | Inverse variance weighted | 21 | -0.0561 | 0.1571 | 0.7208 | 0.0631  | 0.0728 | 0.3966 | 21.3683 | 0.3168 | 4.2721    |
| SmallVesselStroke | s_Bacteroides_coprocola      | Simple mode               | 21 | -0.0390 | 0.3772 | 0.9187 | 0.0631  | 0.0728 | 0.3966 | 21.3683 | 0.3168 | 4.2721    |
| SmallVesselStroke | s_Bacteroides_coprocola      | Weighted mode             | 21 | 0.0248  | 0.3373 | 0.9421 | 0.0631  | 0.0728 | 0.3966 | 21.3683 | 0.3168 | 4.2721    |
| SmallVesselStroke | s_Bacteroides_coprophilus    | MR Egger                  | 21 | -0.4029 | 0.4249 | 0.3548 | 0.0496  | 0.0505 | 0.3383 | 12.8751 | 0.8827 | 20.7401   |
| SmallVesselStroke | s_Bacteroides_coprophilus    | Weighted median           | 21 | 0.0351  | 0.1433 | 0.8063 | 0.0496  | 0.0505 | 0.3383 | 12.8751 | 0.8827 | 20.7401   |
| SmallVesselStroke | s_Bacteroides_coprophilus    | Inverse variance weighted | 21 | 0.0002  | 0.1096 | 0.9984 | 0.0496  | 0.0505 | 0.3383 | 12.8751 | 0.8827 | 20.7401   |
| SmallVesselStroke | s_Bacteroides_coprophilus    | Simple mode               | 21 | 0.0946  | 0.2568 | 0.7165 | 0.0496  | 0.0505 | 0.3383 | 12.8751 | 0.8827 | 20.7401   |
| SmallVesselStroke | s_Bacteroides_coprophilus    | Weighted mode             | 21 | 0.0417  | 0.2484 | 0.8685 | 0.0496  | 0.0505 | 0.3383 | 12.8751 | 0.8827 | 20.7401   |
| SmallVesselStroke | s_Bacteroides_dorei          | MR Egger                  | 21 | 0.2902  | 0.4737 | 0.5475 | -0.0332 | 0.0563 | 0.5621 | 31.6893 | 0.0339 | 4.9678    |
| SmallVesselStroke | s_Bacteroides_dorei          | Weighted median           | 21 | 0.0971  | 0.1451 | 0.5035 | -0.0332 | 0.0563 | 0.5621 | 31.6893 | 0.0339 | 4.9678    |
| SmallVesselStroke | s_Bacteroides_dorei          | Inverse variance weighted | 21 | 0.0201  | 0.1203 | 0.8675 | -0.0332 | 0.0563 | 0.5621 | 31.6893 | 0.0339 | 4.9678    |
| SmallVesselStroke | s_Bacteroides_dorei          | Simple mode               | 21 | 0.1990  | 0.3213 | 0.5427 | -0.0332 | 0.0563 | 0.5621 | 31.6893 | 0.0339 | 4.9678    |
| SmallVesselStroke | s_Bacteroides_dorei          | Weighted mode             | 21 | 0.2066  | 0.2596 | 0.4354 | -0.0332 | 0.0563 | 0.5621 | 31.6893 | 0.0339 | 4.9678    |
| SmallVesselStroke | s_Bacteroides_eggerthii      | MR Egger                  | 21 | 0.5600  | 0.5021 | 0.2787 | -0.0331 | 0.0596 | 0.5853 | 25.2241 | 0.1533 | 9.0661    |
| SmallVesselStroke | s_Bacteroides_eggerthii      | Weighted median           | 21 | 0.3668  | 0.1709 | 0.0318 | -0.0331 | 0.0596 | 0.5853 | 25.2241 | 0.1533 | 9.0661    |
| SmallVesselStroke | s_Bacteroides_eggerthii      | Inverse variance weighted | 21 | 0.2907  | 0.1273 | 0.0224 | -0.0331 | 0.0596 | 0.5853 | 25.2241 | 0.1533 | 9.0661    |

|                   |                                |                           |    |         |        |        |         |        |        |         |        |         |
|-------------------|--------------------------------|---------------------------|----|---------|--------|--------|---------|--------|--------|---------|--------|---------|
| SmallVesselStroke | s_Bacteroides_eggerthii        | Simple mode               | 21 | 0.5497  | 0.3371 | 0.1185 | -0.0331 | 0.0596 | 0.5853 | 25.2241 | 0.1533 | 9.0661  |
| SmallVesselStroke | s_Bacteroides_eggerthii        | Weighted mode             | 21 | 0.4663  | 0.2808 | 0.1124 | -0.0331 | 0.0596 | 0.5853 | 25.2241 | 0.1533 | 9.0661  |
| SmallVesselStroke | s_Bacteroides_finegoldii       | MR Egger                  | 21 | 0.3299  | 0.5005 | 0.5177 | -0.0302 | 0.0595 | 0.6178 | 31.7056 | 0.0337 | 9.9947  |
| SmallVesselStroke | s_Bacteroides_finegoldii       | Weighted median           | 21 | 0.0052  | 0.1488 | 0.9721 | -0.0302 | 0.0595 | 0.6178 | 31.7056 | 0.0337 | 9.9947  |
| SmallVesselStroke | s_Bacteroides_finegoldii       | Inverse variance weighted | 21 | 0.0846  | 0.1268 | 0.5045 | -0.0302 | 0.0595 | 0.6178 | 31.7056 | 0.0337 | 9.9947  |
| SmallVesselStroke | s_Bacteroides_finegoldii       | Simple mode               | 21 | -0.1874 | 0.2972 | 0.5354 | -0.0302 | 0.0595 | 0.6178 | 31.7056 | 0.0337 | 9.9947  |
| SmallVesselStroke | s_Bacteroides_finegoldii       | Weighted mode             | 21 | -0.1471 | 0.2836 | 0.6097 | -0.0302 | 0.0595 | 0.6178 | 31.7056 | 0.0337 | 9.9947  |
| SmallVesselStroke | s_Bacteroides_fluxus           | MR Egger                  | 21 | -0.0019 | 0.3989 | 0.9963 | 0.0189  | 0.0474 | 0.6940 | 20.3195 | 0.3756 | 8.6573  |
| SmallVesselStroke | s_Bacteroides_fluxus           | Weighted median           | 21 | 0.1697  | 0.1378 | 0.2182 | 0.0189  | 0.0474 | 0.6940 | 20.3195 | 0.3756 | 8.6573  |
| SmallVesselStroke | s_Bacteroides_fluxus           | Inverse variance weighted | 21 | 0.1521  | 0.1007 | 0.1311 | 0.0189  | 0.0474 | 0.6940 | 20.3195 | 0.3756 | 8.6573  |
| SmallVesselStroke | s_Bacteroides_fluxus           | Simple mode               | 21 | 0.1683  | 0.2527 | 0.5130 | 0.0189  | 0.0474 | 0.6940 | 20.3195 | 0.3756 | 8.6573  |
| SmallVesselStroke | s_Bacteroides_fluxus           | Weighted mode             | 21 | 0.1345  | 0.2387 | 0.5793 | 0.0189  | 0.0474 | 0.6940 | 20.3195 | 0.3756 | 8.6573  |
| SmallVesselStroke | s_Bacteroides_fragilis         | MR Egger                  | 21 | 0.3252  | 0.4696 | 0.4969 | -0.0419 | 0.0558 | 0.4619 | 20.6365 | 0.3572 | 45.0387 |
| SmallVesselStroke | s_Bacteroides_fragilis         | Weighted median           | 21 | 0.0764  | 0.1516 | 0.6144 | -0.0419 | 0.0558 | 0.4619 | 20.6365 | 0.3572 | 45.0387 |
| SmallVesselStroke | s_Bacteroides_fragilis         | Inverse variance weighted | 21 | -0.0154 | 0.1198 | 0.8974 | -0.0419 | 0.0558 | 0.4619 | 20.6365 | 0.3572 | 45.0387 |
| SmallVesselStroke | s_Bacteroides_fragilis         | Simple mode               | 21 | 0.1435  | 0.2822 | 0.6167 | -0.0419 | 0.0558 | 0.4619 | 20.6365 | 0.3572 | 45.0387 |
| SmallVesselStroke | s_Bacteroides_fragilis         | Weighted mode             | 21 | 0.1435  | 0.2747 | 0.6072 | -0.0419 | 0.0558 | 0.4619 | 20.6365 | 0.3572 | 45.0387 |
| SmallVesselStroke | s_Bacteroides_helcogenes       | MR Egger                  | 21 | 0.2350  | 0.5518 | 0.6751 | -0.0319 | 0.0656 | 0.6322 | 28.8313 | 0.0687 | 2.6190  |
| SmallVesselStroke | s_Bacteroides_helcogenes       | Weighted median           | 21 | 0.0209  | 0.1669 | 0.9005 | -0.0319 | 0.0656 | 0.6322 | 28.8313 | 0.0687 | 2.6190  |
| SmallVesselStroke | s_Bacteroides_helcogenes       | Inverse variance weighted | 21 | -0.0244 | 0.1397 | 0.8614 | -0.0319 | 0.0656 | 0.6322 | 28.8313 | 0.0687 | 2.6190  |
| SmallVesselStroke | s_Bacteroides_helcogenes       | Simple mode               | 21 | 0.0011  | 0.2931 | 0.9970 | -0.0319 | 0.0656 | 0.6322 | 28.8313 | 0.0687 | 2.6190  |
| SmallVesselStroke | s_Bacteroides_helcogenes       | Weighted mode             | 21 | 0.0299  | 0.2963 | 0.9206 | -0.0319 | 0.0656 | 0.6322 | 28.8313 | 0.0687 | 2.6190  |
| SmallVesselStroke | s_Bacteroides_intestinalis     | MR Egger                  | 21 | -0.3222 | 0.5917 | 0.5924 | 0.0231  | 0.0703 | 0.7465 | 30.3335 | 0.0477 | 3.6554  |
| SmallVesselStroke | s_Bacteroides_intestinalis     | Weighted median           | 21 | -0.1562 | 0.1789 | 0.3825 | 0.0231  | 0.0703 | 0.7465 | 30.3335 | 0.0477 | 3.6554  |
| SmallVesselStroke | s_Bacteroides_intestinalis     | Inverse variance weighted | 21 | -0.1347 | 0.1493 | 0.3668 | 0.0231  | 0.0703 | 0.7465 | 30.3335 | 0.0477 | 3.6554  |
| SmallVesselStroke | s_Bacteroides_intestinalis     | Simple mode               | 21 | -0.1239 | 0.2936 | 0.6776 | 0.0231  | 0.0703 | 0.7465 | 30.3335 | 0.0477 | 3.6554  |
| SmallVesselStroke | s_Bacteroides_intestinalis     | Weighted mode             | 21 | -0.0080 | 0.2550 | 0.9753 | 0.0231  | 0.0703 | 0.7465 | 30.3335 | 0.0477 | 3.6554  |
| SmallVesselStroke | s_Bacteroides_ovatus           | MR Egger                  | 21 | 0.5834  | 0.3412 | 0.1036 | -0.0674 | 0.0405 | 0.1130 | 31.1037 | 0.0538 | 24.7532 |
| SmallVesselStroke | s_Bacteroides_ovatus           | Weighted median           | 21 | 0.0553  | 0.1162 | 0.6342 | -0.0674 | 0.0405 | 0.1130 | 31.1037 | 0.0538 | 24.7532 |
| SmallVesselStroke | s_Bacteroides_ovatus           | Inverse variance weighted | 21 | 0.0356  | 0.0919 | 0.6982 | -0.0674 | 0.0405 | 0.1130 | 31.1037 | 0.0538 | 24.7532 |
| SmallVesselStroke | s_Bacteroides_ovatus           | Simple mode               | 21 | 0.0071  | 0.2418 | 0.9770 | -0.0674 | 0.0405 | 0.1130 | 31.1037 | 0.0538 | 24.7532 |
| SmallVesselStroke | s_Bacteroides_ovatus           | Weighted mode             | 21 | 0.0548  | 0.2273 | 0.8120 | -0.0674 | 0.0405 | 0.1130 | 31.1037 | 0.0538 | 24.7532 |
| SmallVesselStroke | s_Bacteroides_pectinophilus    | MR Egger                  | 21 | -0.3591 | 0.3085 | 0.2588 | 0.0531  | 0.0366 | 0.1640 | 24.4866 | 0.2218 | NA      |
| SmallVesselStroke | s_Bacteroides_pectinophilus    | Weighted median           | 21 | 0.0805  | 0.1106 | 0.4664 | 0.0531  | 0.0366 | 0.1640 | 24.4866 | 0.2218 | NA      |
| SmallVesselStroke | s_Bacteroides_pectinophilus    | Inverse variance weighted | 21 | 0.0724  | 0.0818 | 0.3760 | 0.0531  | 0.0366 | 0.1640 | 24.4866 | 0.2218 | NA      |
| SmallVesselStroke | s_Bacteroides_pectinophilus    | Simple mode               | 21 | 0.0348  | 0.2078 | 0.8687 | 0.0531  | 0.0366 | 0.1640 | 24.4866 | 0.2218 | NA      |
| SmallVesselStroke | s_Bacteroides_pectinophilus    | Weighted mode             | 21 | 0.0502  | 0.1950 | 0.7995 | 0.0531  | 0.0366 | 0.1640 | 24.4866 | 0.2218 | NA      |
| SmallVesselStroke | s_Bacteroides_plebeius         | MR Egger                  | 21 | 0.1980  | 0.7311 | 0.7895 | -0.0074 | 0.0869 | 0.9332 | 14.4220 | 0.7586 | 3.2627  |
| SmallVesselStroke | s_Bacteroides_plebeius         | Weighted median           | 21 | 0.1484  | 0.2632 | 0.5727 | -0.0074 | 0.0869 | 0.9332 | 14.4220 | 0.7586 | 3.2627  |
| SmallVesselStroke | s_Bacteroides_plebeius         | Inverse variance weighted | 21 | 0.1380  | 0.1887 | 0.4647 | -0.0074 | 0.0869 | 0.9332 | 14.4220 | 0.7586 | 3.2627  |
| SmallVesselStroke | s_Bacteroides_plebeius         | Simple mode               | 21 | 0.0849  | 0.4420 | 0.8496 | -0.0074 | 0.0869 | 0.9332 | 14.4220 | 0.7586 | 3.2627  |
| SmallVesselStroke | s_Bacteroides_plebeius         | Weighted mode             | 21 | 0.1652  | 0.4313 | 0.7058 | -0.0074 | 0.0869 | 0.9332 | 14.4220 | 0.7586 | 3.2627  |
| SmallVesselStroke | s_Bacteroides_salanitronis     | MR Egger                  | 21 | -0.0235 | 0.3799 | 0.9514 | 0.0136  | 0.0451 | 0.7656 | 28.9923 | 0.0661 | 10.2634 |
| SmallVesselStroke | s_Bacteroides_salanitronis     | Weighted median           | 21 | 0.0764  | 0.1146 | 0.5051 | 0.0136  | 0.0451 | 0.7656 | 28.9923 | 0.0661 | 10.2634 |
| SmallVesselStroke | s_Bacteroides_salanitronis     | Inverse variance weighted | 21 | 0.0875  | 0.0958 | 0.3608 | 0.0136  | 0.0451 | 0.7656 | 28.9923 | 0.0661 | 10.2634 |
| SmallVesselStroke | s_Bacteroides_salanitronis     | Simple mode               | 21 | 0.1241  | 0.1996 | 0.5410 | 0.0136  | 0.0451 | 0.7656 | 28.9923 | 0.0661 | 10.2634 |
| SmallVesselStroke | s_Bacteroides_salanitronis     | Weighted mode             | 21 | 0.0971  | 0.1897 | 0.6144 | 0.0136  | 0.0451 | 0.7656 | 28.9923 | 0.0661 | 10.2634 |
| SmallVesselStroke | s_Bacteroides_stercoris        | MR Egger                  | 21 | 0.0922  | 0.6078 | 0.8811 | 0.0149  | 0.0722 | 0.8386 | 11.6573 | 0.8997 | 38.8233 |
| SmallVesselStroke | s_Bacteroides_stercoris        | Weighted median           | 21 | 0.1945  | 0.2178 | 0.3718 | 0.0149  | 0.0722 | 0.8386 | 11.6573 | 0.8997 | 38.8233 |
| SmallVesselStroke | s_Bacteroides_stercoris        | Inverse variance weighted | 21 | 0.2134  | 0.1568 | 0.1736 | 0.0149  | 0.0722 | 0.8386 | 11.6573 | 0.8997 | 38.8233 |
| SmallVesselStroke | s_Bacteroides_stercoris        | Simple mode               | 21 | -0.1029 | 0.3966 | 0.7979 | 0.0149  | 0.0722 | 0.8386 | 11.6573 | 0.8997 | 38.8233 |
| SmallVesselStroke | s_Bacteroides_stercoris        | Weighted mode             | 21 | 0.0496  | 0.3790 | 0.8971 | 0.0149  | 0.0722 | 0.8386 | 11.6573 | 0.8997 | 38.8233 |
| SmallVesselStroke | s_Bacteroides_thetaiotaomicron | MR Egger                  | 21 | 0.3113  | 0.4035 | 0.4500 | -0.0341 | 0.0479 | 0.4860 | 30.8002 | 0.0425 | 47.4719 |
| SmallVesselStroke | s_Bacteroides_thetaiotaomicron | Weighted median           | 21 | 0.0054  | 0.1259 | 0.9659 | -0.0341 | 0.0479 | 0.4860 | 30.8002 | 0.0425 | 47.4719 |
| SmallVesselStroke | s_Bacteroides_thetaiotaomicron | Inverse variance weighted | 21 | 0.0342  | 0.1028 | 0.7392 | -0.0341 | 0.0479 | 0.4860 | 30.8002 | 0.0425 | 47.4719 |
| SmallVesselStroke | s_Bacteroides_thetaiotaomicron | Simple mode               | 21 | 0.0239  | 0.2563 | 0.9265 | -0.0341 | 0.0479 | 0.4860 | 30.8002 | 0.0425 | 47.4719 |
| SmallVesselStroke | s_Bacteroides_thetaiotaomicron | Weighted mode             | 21 | 0.0645  | 0.2685 | 0.8125 | -0.0341 | 0.0479 | 0.4860 | 30.8002 | 0.0425 | 47.4719 |
| SmallVesselStroke | s_Bacteroides_uniformis        | MR Egger                  | 21 | 0.0215  | 0.4649 | 0.9636 | 0.0072  | 0.0552 | 0.8972 | 27.1616 | 0.1009 | 5.5555  |
| SmallVesselStroke | s_Bacteroides_uniformis        | Weighted median           | 21 | 0.1628  | 0.1458 | 0.2644 | 0.0072  | 0.0552 | 0.8972 | 27.1616 | 0.1009 | 5.5555  |
| SmallVesselStroke | s_Bacteroides_uniformis        | Inverse variance weighted | 21 | 0.0803  | 0.1170 | 0.4928 | 0.0072  | 0.0552 | 0.8972 | 27.1616 | 0.1009 | 5.5555  |
| SmallVesselStroke | s_Bacteroides_uniformis        | Simple mode               | 21 | 0.0176  | 0.2662 | 0.9480 | 0.0072  | 0.0552 | 0.8972 | 27.1616 | 0.1009 | 5.5555  |

|                   |                                                                         |                           |    |         |        |        |         |        |        |         |        |          |
|-------------------|-------------------------------------------------------------------------|---------------------------|----|---------|--------|--------|---------|--------|--------|---------|--------|----------|
| SmallVesselStroke | s_Bacteroides_uniformis                                                 | Weighted mode             | 21 | 0.0714  | 0.2364 | 0.7659 | 0.0072  | 0.0552 | 0.8972 | 27.1616 | 0.1009 | 5.5555   |
| SmallVesselStroke | s_Bacteroides_xylanisolvens                                             | MR Egger                  | 21 | 0.5982  | 0.3916 | 0.1431 | -0.0731 | 0.0465 | 0.1326 | 30.9504 | 0.0558 | 32.5587  |
| SmallVesselStroke | s_Bacteroides_xylanisolvens                                             | Weighted median           | 21 | 0.1695  | 0.1310 | 0.1959 | -0.0731 | 0.0465 | 0.1326 | 30.9504 | 0.0558 | 32.5587  |
| SmallVesselStroke | s_Bacteroides_xylanisolvens                                             | Inverse variance weighted | 21 | 0.0037  | 0.1047 | 0.9721 | -0.0731 | 0.0465 | 0.1326 | 30.9504 | 0.0558 | 32.5587  |
| SmallVesselStroke | s_Bacteroides_xylanisolvens                                             | Simple mode               | 21 | 0.3184  | 0.2999 | 0.3010 | -0.0731 | 0.0465 | 0.1326 | 30.9504 | 0.0558 | 32.5587  |
| SmallVesselStroke | s_Bacteroides_xylanisolvens                                             | Weighted mode             | 21 | 0.3184  | 0.2754 | 0.2613 | -0.0731 | 0.0465 | 0.1326 | 30.9504 | 0.0558 | 32.5587  |
| SmallVesselStroke | s_Bifidobacterium_adolescentis                                          | MR Egger                  | 21 | -1.0351 | 0.8291 | 0.2270 | 0.1017  | 0.0985 | 0.3149 | 17.8171 | 0.5995 | -12.3699 |
| SmallVesselStroke | s_Bifidobacterium_adolescentis                                          | Weighted median           | 21 | -0.0978 | 0.3025 | 0.7464 | 0.1017  | 0.0985 | 0.3149 | 17.8171 | 0.5995 | -12.3699 |
| SmallVesselStroke | s_Bifidobacterium_adolescentis                                          | Inverse variance weighted | 21 | -0.2082 | 0.2140 | 0.3307 | 0.1017  | 0.0985 | 0.3149 | 17.8171 | 0.5995 | -12.3699 |
| SmallVesselStroke | s_Bifidobacterium_adolescentis                                          | Simple mode               | 21 | 0.1600  | 0.4860 | 0.7454 | 0.1017  | 0.0985 | 0.3149 | 17.8171 | 0.5995 | -12.3699 |
| SmallVesselStroke | s_Bifidobacterium_adolescentis                                          | Weighted mode             | 21 | 0.0848  | 0.5718 | 0.8836 | 0.1017  | 0.0985 | 0.3149 | 17.8171 | 0.5995 | -12.3699 |
| SmallVesselStroke | s_Bifidobacterium_animalis                                              | MR Egger                  | 21 | -0.3874 | 0.5477 | 0.4879 | 0.0392  | 0.0651 | 0.5537 | 11.4121 | 0.9092 | 17.7173  |
| SmallVesselStroke | s_Bifidobacterium_animalis                                              | Weighted median           | 21 | -0.0988 | 0.1916 | 0.6062 | 0.0392  | 0.0651 | 0.5537 | 11.4121 | 0.9092 | 17.7173  |
| SmallVesselStroke | s_Bifidobacterium_animalis                                              | Inverse variance weighted | 21 | -0.0684 | 0.1413 | 0.6284 | 0.0392  | 0.0651 | 0.5537 | 11.4121 | 0.9092 | 17.7173  |
| SmallVesselStroke | s_Bifidobacterium_animalis                                              | Simple mode               | 21 | -0.1052 | 0.3567 | 0.7710 | 0.0392  | 0.0651 | 0.5537 | 11.4121 | 0.9092 | 17.7173  |
| SmallVesselStroke | s_Bifidobacterium_animalis                                              | Weighted mode             | 21 | -0.1468 | 0.3398 | 0.6703 | 0.0392  | 0.0651 | 0.5537 | 11.4121 | 0.9092 | 17.7173  |
| SmallVesselStroke | s_Bifidobacterium_bifidum                                               | MR Egger                  | 21 | -0.7815 | 0.9540 | 0.4228 | 0.0943  | 0.1133 | 0.4158 | 25.5960 | 0.1418 | 1.3142   |
| SmallVesselStroke | s_Bifidobacterium_bifidum                                               | Weighted median           | 21 | -0.1437 | 0.3089 | 0.6419 | 0.0943  | 0.1133 | 0.4158 | 25.5960 | 0.1418 | 1.3142   |
| SmallVesselStroke | s_Bifidobacterium_bifidum                                               | Inverse variance weighted | 21 | -0.0147 | 0.2442 | 0.9519 | 0.0943  | 0.1133 | 0.4158 | 25.5960 | 0.1418 | 1.3142   |
| SmallVesselStroke | s_Bifidobacterium_bifidum                                               | Simple mode               | 21 | -0.0125 | 0.5386 | 0.9818 | 0.0943  | 0.1133 | 0.4158 | 25.5960 | 0.1418 | 1.3142   |
| SmallVesselStroke | s_Bifidobacterium_bifidum                                               | Weighted mode             | 21 | -0.1626 | 0.5035 | 0.7500 | 0.0943  | 0.1133 | 0.4158 | 25.5960 | 0.1418 | 1.3142   |
| SmallVesselStroke | s_Bifidobacterium_breve                                                 | MR Egger                  | 21 | -0.3573 | 0.5543 | 0.5269 | 0.0286  | 0.0659 | 0.6691 | 18.3956 | 0.4962 | 6.2811   |
| SmallVesselStroke | s_Bifidobacterium_breve                                                 | Weighted median           | 21 | -0.1120 | 0.2002 | 0.5759 | 0.0286  | 0.0659 | 0.6691 | 18.3956 | 0.4962 | 6.2811   |
| SmallVesselStroke | s_Bifidobacterium_breve                                                 | Inverse variance weighted | 21 | -0.1249 | 0.1431 | 0.3829 | 0.0286  | 0.0659 | 0.6691 | 18.3956 | 0.4962 | 6.2811   |
| SmallVesselStroke | s_Bifidobacterium_breve                                                 | Simple mode               | 21 | -0.0910 | 0.3731 | 0.8097 | 0.0286  | 0.0659 | 0.6691 | 18.3956 | 0.4962 | 6.2811   |
| SmallVesselStroke | s_Bifidobacterium_breve                                                 | Weighted mode             | 21 | -0.0756 | 0.4044 | 0.8535 | 0.0286  | 0.0659 | 0.6691 | 18.3956 | 0.4962 | 6.2811   |
| SmallVesselStroke | s_Bifidobacterium_catenulatum-Bifidobacterium_pseudocatenulatum_complex | MR Egger                  | 21 | -0.4492 | 0.7009 | 0.5293 | 0.0309  | 0.0833 | 0.7151 | 27.0657 | 0.1031 | -81.1048 |
| SmallVesselStroke | s_Bifidobacterium_catenulatum-Bifidobacterium_pseudocatenulatum_complex | Weighted median           | 21 | -0.2044 | 0.2100 | 0.3304 | 0.0309  | 0.0833 | 0.7151 | 27.0657 | 0.1031 | -81.1048 |
| SmallVesselStroke | s_Bifidobacterium_catenulatum-Bifidobacterium_pseudocatenulatum_complex | Inverse variance weighted | 21 | -0.1983 | 0.1771 | 0.2628 | 0.0309  | 0.0833 | 0.7151 | 27.0657 | 0.1031 | -81.1048 |
| SmallVesselStroke | s_Bifidobacterium_catenulatum-Bifidobacterium_pseudocatenulatum_complex | Simple mode               | 21 | -0.1620 | 0.3697 | 0.6659 | 0.0309  | 0.0833 | 0.7151 | 27.0657 | 0.1031 | -81.1048 |
| SmallVesselStroke | s_Bifidobacterium_catenulatum-Bifidobacterium_pseudocatenulatum_complex | Weighted mode             | 21 | -0.1964 | 0.3883 | 0.6185 | 0.0309  | 0.0833 | 0.7151 | 27.0657 | 0.1031 | -81.1048 |
| SmallVesselStroke | s_Bifidobacterium_longum                                                | MR Egger                  | 21 | -0.2511 | 0.5312 | 0.6419 | 0.0354  | 0.0631 | 0.5809 | 21.5044 | 0.3096 | 7.2267   |
| SmallVesselStroke | s_Bifidobacterium_longum                                                | Weighted median           | 21 | 0.1677  | 0.1828 | 0.3588 | 0.0354  | 0.0631 | 0.5809 | 21.5044 | 0.3096 | 7.2267   |
| SmallVesselStroke | s_Bifidobacterium_longum                                                | Inverse variance weighted | 21 | 0.0372  | 0.1348 | 0.7826 | 0.0354  | 0.0631 | 0.5809 | 21.5044 | 0.3096 | 7.2267   |
| SmallVesselStroke | s_Bifidobacterium_longum                                                | Simple mode               | 21 | 0.2881  | 0.4003 | 0.4800 | 0.0354  | 0.0631 | 0.5809 | 21.5044 | 0.3096 | 7.2267   |
| SmallVesselStroke | s_Bifidobacterium_longum                                                | Weighted mode             | 21 | 0.2339  | 0.3782 | 0.5432 | 0.0354  | 0.0631 | 0.5809 | 21.5044 | 0.3096 | 7.2267   |
| SmallVesselStroke | s_Bilophila_wadsworthia                                                 | MR Egger                  | 21 | -0.6158 | 0.5604 | 0.2856 | 0.0893  | 0.0666 | 0.1955 | 25.2812 | 0.1909 | 5.7744   |
| SmallVesselStroke | s_Bilophila_wadsworthia                                                 | Weighted median           | 21 | 0.1565  | 0.1952 | 0.4228 | 0.0893  | 0.0666 | 0.1955 | 25.2812 | 0.1909 | 5.7744   |
| SmallVesselStroke | s_Bilophila_wadsworthia                                                 | Inverse variance weighted | 21 | 0.1107  | 0.1475 | 0.4528 | 0.0893  | 0.0666 | 0.1955 | 25.2812 | 0.1909 | 5.7744   |
| SmallVesselStroke | s_Bilophila_wadsworthia                                                 | Simple mode               | 21 | 0.2730  | 0.3553 | 0.4512 | 0.0893  | 0.0666 | 0.1955 | 25.2812 | 0.1909 | 5.7744   |
| SmallVesselStroke | s_Bilophila_wadsworthia                                                 | Weighted mode             | 21 | 0.2221  | 0.3382 | 0.5189 | 0.0893  | 0.0666 | 0.1955 | 25.2812 | 0.1909 | 5.7744   |
| SmallVesselStroke | s_Blautia_hansenii                                                      | MR Egger                  | 21 | 0.0207  | 0.2481 | 0.9343 | 0.0040  | 0.0295 | 0.8936 | 23.3967 | 0.2203 | 87.2196  |
| SmallVesselStroke | s_Blautia_hansenii                                                      | Weighted median           | 21 | 0.1552  | 0.0850 | 0.0679 | 0.0040  | 0.0295 | 0.8936 | 23.3967 | 0.2203 | 87.2196  |
| SmallVesselStroke | s_Blautia_hansenii                                                      | Inverse variance weighted | 21 | 0.0532  | 0.0624 | 0.3940 | 0.0040  | 0.0295 | 0.8936 | 23.3967 | 0.2203 | 87.2196  |
| SmallVesselStroke | s_Blautia_hansenii                                                      | Simple mode               | 21 | 0.1947  | 0.1602 | 0.2382 | 0.0040  | 0.0295 | 0.8936 | 23.3967 | 0.2203 | 87.2196  |
| SmallVesselStroke | s_Blautia_hansenii                                                      | Weighted mode             | 21 | 0.2015  | 0.1533 | 0.2036 | 0.0040  | 0.0295 | 0.8936 | 23.3967 | 0.2203 | 87.2196  |
| SmallVesselStroke | s_Blautia_hydrogenotrophica                                             | MR Egger                  | 21 | -0.0888 | 0.3162 | 0.7819 | 0.0086  | 0.0376 | 0.8220 | 29.4837 | 0.0587 | 23.9414  |
| SmallVesselStroke | s_Blautia_hydrogenotrophica                                             | Weighted median           | 21 | -0.0330 | 0.1003 | 0.7422 | 0.0086  | 0.0376 | 0.8220 | 29.4837 | 0.0587 | 23.9414  |
| SmallVesselStroke | s_Blautia_hydrogenotrophica                                             | Inverse variance weighted | 21 | -0.0191 | 0.0796 | 0.8104 | 0.0086  | 0.0376 | 0.8220 | 29.4837 | 0.0587 | 23.9414  |
| SmallVesselStroke | s_Blautia_hydrogenotrophica                                             | Simple mode               | 21 | -0.1017 | 0.1805 | 0.5795 | 0.0086  | 0.0376 | 0.8220 | 29.4837 | 0.0587 | 23.9414  |
| SmallVesselStroke | s_Blautia_hydrogenotrophica                                             | Weighted mode             | 21 | 0.0125  | 0.1656 | 0.9408 | 0.0086  | 0.0376 | 0.8220 | 29.4837 | 0.0587 | 23.9414  |
| SmallVesselStroke | s_Butyrvibrio_crossotus                                                 | MR Egger                  | 21 | -0.6478 | 0.3470 | 0.0774 | 0.0851  | 0.0412 | 0.0528 | 27.2932 | 0.1272 | 25.4264  |
| SmallVesselStroke | s_Butyrvibrio_crossotus                                                 | Weighted median           | 21 | 0.0351  | 0.1241 | 0.7771 | 0.0851  | 0.0412 | 0.0528 | 27.2932 | 0.1272 | 25.4264  |
| SmallVesselStroke | s_Butyrvibrio_crossotus                                                 | Inverse variance weighted | 21 | 0.0445  | 0.0966 | 0.6452 | 0.0851  | 0.0412 | 0.0528 | 27.2932 | 0.1272 | 25.4264  |
| SmallVesselStroke | s_Butyrvibrio_crossotus                                                 | Simple mode               | 21 | 0.1062  | 0.2148 | 0.6264 | 0.0851  | 0.0412 | 0.0528 | 27.2932 | 0.1272 | 25.4264  |
| SmallVesselStroke | s_Butyrvibrio_crossotus                                                 | Weighted mode             | 21 | 0.1124  | 0.2095 | 0.5974 | 0.0851  | 0.0412 | 0.0528 | 27.2932 | 0.1272 | 25.4264  |
| SmallVesselStroke | s_Campylobacter_jejuni                                                  | MR Egger                  | 21 | 0.6289  | 0.4119 | 0.1433 | -0.0619 | 0.0489 | 0.2209 | 24.0649 | 0.2396 | 21.0415  |
| SmallVesselStroke | s_Campylobacter_jejuni                                                  | Weighted median           | 21 | 0.1388  | 0.1433 | 0.3327 | -0.0619 | 0.0489 | 0.2209 | 24.0649 | 0.2396 | 21.0415  |
| SmallVesselStroke | s_Campylobacter_jejuni                                                  | Inverse variance weighted | 21 | 0.1251  | 0.1079 | 0.2460 | -0.0619 | 0.0489 | 0.2209 | 24.0649 | 0.2396 | 21.0415  |
| SmallVesselStroke | s_Campylobacter_jejuni                                                  | Simple mode               | 21 | 0.2766  | 0.2630 | 0.3054 | -0.0619 | 0.0489 | 0.2209 | 24.0649 | 0.2396 | 21.0415  |
| SmallVesselStroke | s_Campylobacter_jejuni                                                  | Weighted mode             | 21 | 0.2563  | 0.2731 | 0.3592 | -0.0619 | 0.0489 | 0.2209 | 24.0649 | 0.2396 | 21.0415  |

|                   |                                 |                           |    |         |        |        |         |        |        |         |        |         |
|-------------------|---------------------------------|---------------------------|----|---------|--------|--------|---------|--------|--------|---------|--------|---------|
| SmallVesselStroke | s_Citrobacter_koseri            | MR Egger                  | 21 | 0.2219  | 0.5816 | 0.7070 | -0.0331 | 0.0691 | 0.6377 | 20.4689 | 0.3669 | 8.3742  |
| SmallVesselStroke | s_Citrobacter_koseri            | Weighted median           | 21 | 0.0027  | 0.2039 | 0.9895 | -0.0331 | 0.0691 | 0.6377 | 20.4689 | 0.3669 | 8.3742  |
| SmallVesselStroke | s_Citrobacter_koseri            | Inverse variance weighted | 21 | -0.0470 | 0.1472 | 0.7493 | -0.0331 | 0.0691 | 0.6377 | 20.4689 | 0.3669 | 8.3742  |
| SmallVesselStroke | s_Citrobacter_koseri            | Simple mode               | 21 | -0.0925 | 0.3868 | 0.8134 | -0.0331 | 0.0691 | 0.6377 | 20.4689 | 0.3669 | 8.3742  |
| SmallVesselStroke | s_Citrobacter_koseri            | Weighted mode             | 21 | -0.0070 | 0.3665 | 0.9850 | -0.0331 | 0.0691 | 0.6377 | 20.4689 | 0.3669 | 8.3742  |
| SmallVesselStroke | s_Citrobacter_youngae           | MR Egger                  | 21 | -0.5658 | 0.7037 | 0.4313 | 0.0767  | 0.0836 | 0.3704 | 15.9586 | 0.6600 | 17.6599 |
| SmallVesselStroke | s_Citrobacter_youngae           | Weighted median           | 21 | 0.1088  | 0.2518 | 0.6656 | 0.0767  | 0.0836 | 0.3704 | 15.9586 | 0.6600 | 17.6599 |
| SmallVesselStroke | s_Citrobacter_youngae           | Inverse variance weighted | 21 | 0.0580  | 0.1816 | 0.7494 | 0.0767  | 0.0836 | 0.3704 | 15.9586 | 0.6600 | 17.6599 |
| SmallVesselStroke | s_Citrobacter_youngae           | Simple mode               | 21 | 0.1105  | 0.4550 | 0.8106 | 0.0767  | 0.0836 | 0.3704 | 15.9586 | 0.6600 | 17.6599 |
| SmallVesselStroke | s_Citrobacter_youngae           | Weighted mode             | 21 | 0.1197  | 0.4869 | 0.8083 | 0.0767  | 0.0836 | 0.3704 | 15.9586 | 0.6600 | 17.6599 |
| SmallVesselStroke | s_Clostridiales_genomosp._BVAB3 | MR Egger                  | 21 | 0.3067  | 0.6558 | 0.6454 | -0.0210 | 0.0778 | 0.7906 | 19.4618 | 0.4276 | 1.6902  |
| SmallVesselStroke | s_Clostridiales_genomosp._BVAB3 | Weighted median           | 21 | 0.1030  | 0.2399 | 0.6678 | -0.0210 | 0.0778 | 0.7906 | 19.4618 | 0.4276 | 1.6902  |
| SmallVesselStroke | s_Clostridiales_genomosp._BVAB3 | Inverse variance weighted | 21 | 0.1360  | 0.1663 | 0.4136 | -0.0210 | 0.0778 | 0.7906 | 19.4618 | 0.4276 | 1.6902  |
| SmallVesselStroke | s_Clostridiales_genomosp._BVAB3 | Simple mode               | 21 | 0.4275  | 0.4666 | 0.3705 | -0.0210 | 0.0778 | 0.7906 | 19.4618 | 0.4276 | 1.6902  |
| SmallVesselStroke | s_Clostridiales_genomosp._BVAB3 | Weighted mode             | 21 | 0.4718  | 0.4685 | 0.3260 | -0.0210 | 0.0778 | 0.7906 | 19.4618 | 0.4276 | 1.6902  |
| SmallVesselStroke | s_Clostridium_bartlettii        | MR Egger                  | 21 | -0.0734 | 0.3953 | 0.8547 | -0.0045 | 0.0470 | 0.9245 | 21.8430 | 0.2921 | NA      |
| SmallVesselStroke | s_Clostridium_bartlettii        | Weighted median           | 21 | -0.1040 | 0.1316 | 0.4296 | -0.0045 | 0.0470 | 0.9245 | 21.8430 | 0.2921 | NA      |
| SmallVesselStroke | s_Clostridium_bartlettii        | Inverse variance weighted | 21 | -0.1101 | 0.0995 | 0.2685 | -0.0045 | 0.0470 | 0.9245 | 21.8430 | 0.2921 | NA      |
| SmallVesselStroke | s_Clostridium_bartlettii        | Simple mode               | 21 | -0.2075 | 0.2388 | 0.3953 | -0.0045 | 0.0470 | 0.9245 | 21.8430 | 0.2921 | NA      |
| SmallVesselStroke | s_Clostridium_bartlettii        | Weighted mode             | 21 | -0.1679 | 0.2245 | 0.4633 | -0.0045 | 0.0470 | 0.9245 | 21.8430 | 0.2921 | NA      |
| SmallVesselStroke | s_Clostridium_bolteae           | MR Egger                  | 21 | 0.8247  | 0.4662 | 0.0929 | -0.0959 | 0.0554 | 0.0994 | 22.3014 | 0.3244 | 21.0783 |
| SmallVesselStroke | s_Clostridium_bolteae           | Weighted median           | 21 | -0.0440 | 0.1723 | 0.7987 | -0.0959 | 0.0554 | 0.0994 | 22.3014 | 0.3244 | 21.0783 |
| SmallVesselStroke | s_Clostridium_bolteae           | Inverse variance weighted | 21 | 0.0445  | 0.1262 | 0.7245 | -0.0959 | 0.0554 | 0.0994 | 22.3014 | 0.3244 | 21.0783 |
| SmallVesselStroke | s_Clostridium_bolteae           | Simple mode               | 21 | -0.1506 | 0.3495 | 0.6712 | -0.0959 | 0.0554 | 0.0994 | 22.3014 | 0.3244 | 21.0783 |
| SmallVesselStroke | s_Clostridium_bolteae           | Weighted mode             | 21 | -0.1201 | 0.3384 | 0.7263 | -0.0959 | 0.0554 | 0.0994 | 22.3014 | 0.3244 | 21.0783 |
| SmallVesselStroke | s_Clostridium_difficile         | MR Egger                  | 21 | 0.0774  | 0.2302 | 0.7404 | -0.0103 | 0.0274 | 0.7106 | 27.7347 | 0.0887 | NA      |
| SmallVesselStroke | s_Clostridium_difficile         | Weighted median           | 21 | -0.0844 | 0.0760 | 0.2669 | -0.0103 | 0.0274 | 0.7106 | 27.7347 | 0.0887 | NA      |
| SmallVesselStroke | s_Clostridium_difficile         | Inverse variance weighted | 21 | -0.0064 | 0.0581 | 0.9126 | -0.0103 | 0.0274 | 0.7106 | 27.7347 | 0.0887 | NA      |
| SmallVesselStroke | s_Clostridium_difficile         | Simple mode               | 21 | -0.1114 | 0.1315 | 0.4070 | -0.0103 | 0.0274 | 0.7106 | 27.7347 | 0.0887 | NA      |
| SmallVesselStroke | s_Clostridium_difficile         | Weighted mode             | 21 | -0.1114 | 0.1393 | 0.4331 | -0.0103 | 0.0274 | 0.7106 | 27.7347 | 0.0887 | NA      |
| SmallVesselStroke | s_Clostridium_leptum            | MR Egger                  | 21 | -0.1933 | 0.5025 | 0.7047 | 0.0180  | 0.0597 | 0.7664 | 21.5367 | 0.3079 | 18.7865 |
| SmallVesselStroke | s_Clostridium_leptum            | Weighted median           | 21 | -0.1645 | 0.1729 | 0.3414 | 0.0180  | 0.0597 | 0.7664 | 21.5367 | 0.3079 | 18.7865 |
| SmallVesselStroke | s_Clostridium_leptum            | Inverse variance weighted | 21 | -0.0470 | 0.1267 | 0.7108 | 0.0180  | 0.0597 | 0.7664 | 21.5367 | 0.3079 | 18.7865 |
| SmallVesselStroke | s_Clostridium_leptum            | Simple mode               | 21 | -0.2471 | 0.2920 | 0.4074 | 0.0180  | 0.0597 | 0.7664 | 21.5367 | 0.3079 | 18.7865 |
| SmallVesselStroke | s_Clostridium_leptum            | Weighted mode             | 21 | -0.1950 | 0.2887 | 0.5071 | 0.0180  | 0.0597 | 0.7664 | 21.5367 | 0.3079 | 18.7865 |
| SmallVesselStroke | s_Clostridium_methylpentosum    | MR Egger                  | 21 | -0.2384 | 0.5185 | 0.6509 | 0.0328  | 0.0616 | 0.6002 | 32.1630 | 0.0300 | 13.8346 |
| SmallVesselStroke | s_Clostridium_methylpentosum    | Weighted median           | 21 | -0.0309 | 0.1607 | 0.8474 | 0.0328  | 0.0616 | 0.6002 | 32.1630 | 0.0300 | 13.8346 |
| SmallVesselStroke | s_Clostridium_methylpentosum    | Inverse variance weighted | 21 | 0.0286  | 0.1314 | 0.8275 | 0.0328  | 0.0616 | 0.6002 | 32.1630 | 0.0300 | 13.8346 |
| SmallVesselStroke | s_Clostridium_methylpentosum    | Simple mode               | 21 | -0.3626 | 0.3145 | 0.2625 | 0.0328  | 0.0616 | 0.6002 | 32.1630 | 0.0300 | 13.8346 |
| SmallVesselStroke | s_Clostridium_methylpentosum    | Weighted mode             | 21 | -0.1941 | 0.2640 | 0.4708 | 0.0328  | 0.0616 | 0.6002 | 32.1630 | 0.0300 | 13.8346 |
| SmallVesselStroke | s_Clostridium_perfringens       | MR Egger                  | 21 | -1.1704 | 0.6115 | 0.0708 | 0.1149  | 0.0727 | 0.1301 | 22.3988 | 0.3193 | 6.4768  |
| SmallVesselStroke | s_Clostridium_perfringens       | Weighted median           | 21 | -0.3202 | 0.2339 | 0.1711 | 0.1149  | 0.0727 | 0.1301 | 22.3988 | 0.3193 | 6.4768  |
| SmallVesselStroke | s_Clostridium_perfringens       | Inverse variance weighted | 21 | -0.2357 | 0.1636 | 0.1498 | 0.1149  | 0.0727 | 0.1301 | 22.3988 | 0.3193 | 6.4768  |
| SmallVesselStroke | s_Clostridium_perfringens       | Simple mode               | 21 | -0.4709 | 0.4518 | 0.3096 | 0.1149  | 0.0727 | 0.1301 | 22.3988 | 0.3193 | 6.4768  |
| SmallVesselStroke | s_Clostridium_perfringens       | Weighted mode             | 21 | -0.5011 | 0.4563 | 0.2852 | 0.1149  | 0.0727 | 0.1301 | 22.3988 | 0.3193 | 6.4768  |
| SmallVesselStroke | s_Clostridium_ramosum           | MR Egger                  | 21 | -0.1319 | 0.5033 | 0.7960 | 0.0069  | 0.0598 | 0.9089 | 11.5775 | 0.9029 | 40.5728 |
| SmallVesselStroke | s_Clostridium_ramosum           | Weighted median           | 21 | -0.0502 | 0.1740 | 0.7728 | 0.0069  | 0.0598 | 0.9089 | 11.5775 | 0.9029 | 40.5728 |
| SmallVesselStroke | s_Clostridium_ramosum           | Inverse variance weighted | 21 | -0.0755 | 0.1299 | 0.5608 | 0.0069  | 0.0598 | 0.9089 | 11.5775 | 0.9029 | 40.5728 |
| SmallVesselStroke | s_Clostridium_ramosum           | Simple mode               | 21 | -0.1362 | 0.3195 | 0.6744 | 0.0069  | 0.0598 | 0.9089 | 11.5775 | 0.9029 | 40.5728 |
| SmallVesselStroke | s_Clostridium_ramosum           | Weighted mode             | 21 | -0.1126 | 0.3099 | 0.7201 | 0.0069  | 0.0598 | 0.9089 | 11.5775 | 0.9029 | 40.5728 |
| SmallVesselStroke | s_Clostridium_saccharolyticum   | MR Egger                  | 21 | 0.2104  | 0.2361 | 0.3839 | -0.0143 | 0.0280 | 0.6150 | 19.3188 | 0.4366 | 68.8420 |
| SmallVesselStroke | s_Clostridium_saccharolyticum   | Weighted median           | 21 | 0.0081  | 0.0841 | 0.9234 | -0.0143 | 0.0280 | 0.6150 | 19.3188 | 0.4366 | 68.8420 |
| SmallVesselStroke | s_Clostridium_saccharolyticum   | Inverse variance weighted | 21 | 0.0938  | 0.0604 | 0.1206 | -0.0143 | 0.0280 | 0.6150 | 19.3188 | 0.4366 | 68.8420 |
| SmallVesselStroke | s_Clostridium_saccharolyticum   | Simple mode               | 21 | -0.0306 | 0.1581 | 0.8483 | -0.0143 | 0.0280 | 0.6150 | 19.3188 | 0.4366 | 68.8420 |
| SmallVesselStroke | s_Clostridium_saccharolyticum   | Weighted mode             | 21 | -0.0352 | 0.1586 | 0.8268 | -0.0143 | 0.0280 | 0.6150 | 19.3188 | 0.4366 | 68.8420 |
| SmallVesselStroke | s_Clostridium_spiroforme        | MR Egger                  | 21 | -0.8076 | 0.5386 | 0.1502 | 0.0856  | 0.0640 | 0.1967 | 32.7736 | 0.0357 | 9.1971  |
| SmallVesselStroke | s_Clostridium_spiroforme        | Weighted median           | 21 | 0.1072  | 0.1762 | 0.5429 | 0.0856  | 0.0640 | 0.1967 | 32.7736 | 0.0357 | 9.1971  |
| SmallVesselStroke | s_Clostridium_spiroforme        | Inverse variance weighted | 21 | -0.1114 | 0.1417 | 0.4320 | 0.0856  | 0.0640 | 0.1967 | 32.7736 | 0.0357 | 9.1971  |
| SmallVesselStroke | s_Clostridium_spiroforme        | Simple mode               | 21 | 0.3073  | 0.2990 | 0.3162 | 0.0856  | 0.0640 | 0.1967 | 32.7736 | 0.0357 | 9.1971  |
| SmallVesselStroke | s_Clostridium_spiroforme        | Weighted mode             | 21 | 0.2685  | 0.2936 | 0.3712 | 0.0856  | 0.0640 | 0.1967 | 32.7736 | 0.0357 | 9.1971  |
| SmallVesselStroke | s_Collinsella_aerofaciens       | MR Egger                  | 21 | -0.1158 | 0.8622 | 0.8946 | 0.0258  | 0.1024 | 0.8035 | 24.0192 | 0.1954 | 3.8045  |

|                   |                           |                           |    |         |        |        |         |        |        |         |        |          |
|-------------------|---------------------------|---------------------------|----|---------|--------|--------|---------|--------|--------|---------|--------|----------|
| SmallVesselStroke | s_Collinsella_aerofaciens | Weighted median           | 21 | 0.0162  | 0.2835 | 0.9544 | 0.0258  | 0.1024 | 0.8035 | 24.0192 | 0.1954 | 3.8045   |
| SmallVesselStroke | s_Collinsella_aerofaciens | Inverse variance weighted | 21 | 0.0944  | 0.2172 | 0.6638 | 0.0258  | 0.1024 | 0.8035 | 24.0192 | 0.1954 | 3.8045   |
| SmallVesselStroke | s_Collinsella_aerofaciens | Simple mode               | 21 | -0.0427 | 0.5395 | 0.9377 | 0.0258  | 0.1024 | 0.8035 | 24.0192 | 0.1954 | 3.8045   |
| SmallVesselStroke | s_Collinsella_aerofaciens | Weighted mode             | 21 | 0.2273  | 0.5092 | 0.6602 | 0.0258  | 0.1024 | 0.8035 | 24.0192 | 0.1954 | 3.8045   |
| SmallVesselStroke | s_Coprococcus_catus       | MR Egger                  | 21 | -0.0166 | 0.3358 | 0.9610 | 0.0042  | 0.0399 | 0.9163 | 30.9032 | 0.0414 | 22.7423  |
| SmallVesselStroke | s_Coprococcus_catus       | Weighted median           | 21 | -0.0189 | 0.1001 | 0.8502 | 0.0042  | 0.0399 | 0.9163 | 30.9032 | 0.0414 | 22.7423  |
| SmallVesselStroke | s_Coprococcus_catus       | Inverse variance weighted | 21 | 0.0179  | 0.0845 | 0.8322 | 0.0042  | 0.0399 | 0.9163 | 30.9032 | 0.0414 | 22.7423  |
| SmallVesselStroke | s_Coprococcus_catus       | Simple mode               | 21 | -0.1058 | 0.1707 | 0.5422 | 0.0042  | 0.0399 | 0.9163 | 30.9032 | 0.0414 | 22.7423  |
| SmallVesselStroke | s_Coprococcus_catus       | Weighted mode             | 21 | -0.1058 | 0.1542 | 0.5004 | 0.0042  | 0.0399 | 0.9163 | 30.9032 | 0.0414 | 22.7423  |
| SmallVesselStroke | s_Coprococcus_eutactus    | MR Egger                  | 21 | -0.2101 | 0.5324 | 0.6975 | 0.0361  | 0.0632 | 0.5750 | 25.0099 | 0.1602 | 17.0454  |
| SmallVesselStroke | s_Coprococcus_eutactus    | Weighted median           | 21 | 0.1664  | 0.1711 | 0.3310 | 0.0361  | 0.0632 | 0.5750 | 25.0099 | 0.1602 | 17.0454  |
| SmallVesselStroke | s_Coprococcus_eutactus    | Inverse variance weighted | 21 | 0.0833  | 0.1350 | 0.5371 | 0.0361  | 0.0632 | 0.5750 | 25.0099 | 0.1602 | 17.0454  |
| SmallVesselStroke | s_Coprococcus_eutactus    | Simple mode               | 21 | 0.1126  | 0.3543 | 0.7539 | 0.0361  | 0.0632 | 0.5750 | 25.0099 | 0.1602 | 17.0454  |
| SmallVesselStroke | s_Coprococcus_eutactus    | Weighted mode             | 21 | 0.1355  | 0.3143 | 0.6709 | 0.0361  | 0.0632 | 0.5750 | 25.0099 | 0.1602 | 17.0454  |
| SmallVesselStroke | s_Desulfovibrio_piger     | MR Egger                  | 21 | 0.1134  | 1.1475 | 0.9223 | -0.0462 | 0.1363 | 0.7383 | 29.1478 | 0.0637 | -35.1960 |
| SmallVesselStroke | s_Desulfovibrio_piger     | Weighted median           | 21 | -0.3789 | 0.3502 | 0.2793 | -0.0462 | 0.1363 | 0.7383 | 29.1478 | 0.0637 | -35.1960 |
| SmallVesselStroke | s_Desulfovibrio_piger     | Inverse variance weighted | 21 | -0.2625 | 0.2896 | 0.3648 | -0.0462 | 0.1363 | 0.7383 | 29.1478 | 0.0637 | -35.1960 |
| SmallVesselStroke | s_Desulfovibrio_piger     | Simple mode               | 21 | -0.9073 | 0.6956 | 0.2069 | -0.0462 | 0.1363 | 0.7383 | 29.1478 | 0.0637 | -35.1960 |
| SmallVesselStroke | s_Desulfovibrio_piger     | Weighted mode             | 21 | -0.8154 | 0.6572 | 0.2291 | -0.0462 | 0.1363 | 0.7383 | 29.1478 | 0.0637 | -35.1960 |
| SmallVesselStroke | s_Dorea_formicigenerans   | MR Egger                  | 21 | -0.4340 | 0.3032 | 0.1686 | 0.0494  | 0.0360 | 0.1864 | 27.7567 | 0.1153 | 25.4211  |
| SmallVesselStroke | s_Dorea_formicigenerans   | Weighted median           | 21 | -0.0205 | 0.0963 | 0.8315 | 0.0494  | 0.0360 | 0.1864 | 27.7567 | 0.1153 | 25.4211  |
| SmallVesselStroke | s_Dorea_formicigenerans   | Inverse variance weighted | 21 | -0.0325 | 0.0800 | 0.6845 | 0.0494  | 0.0360 | 0.1864 | 27.7567 | 0.1153 | 25.4211  |
| SmallVesselStroke | s_Dorea_formicigenerans   | Simple mode               | 21 | 0.0724  | 0.1680 | 0.6710 | 0.0494  | 0.0360 | 0.1864 | 27.7567 | 0.1153 | 25.4211  |
| SmallVesselStroke | s_Dorea_formicigenerans   | Weighted mode             | 21 | 0.0582  | 0.1720 | 0.7387 | 0.0494  | 0.0360 | 0.1864 | 27.7567 | 0.1153 | 25.4211  |
| SmallVesselStroke | s_Dorea_longicatena       | MR Egger                  | 21 | -0.4712 | 0.3442 | 0.1869 | 0.0520  | 0.0409 | 0.2185 | 23.1761 | 0.2802 | 17.8161  |
| SmallVesselStroke | s_Dorea_longicatena       | Weighted median           | 21 | -0.1801 | 0.1231 | 0.1434 | 0.0520  | 0.0409 | 0.2185 | 23.1761 | 0.2802 | 17.8161  |
| SmallVesselStroke | s_Dorea_longicatena       | Inverse variance weighted | 21 | -0.0481 | 0.0902 | 0.5940 | 0.0520  | 0.0409 | 0.2185 | 23.1761 | 0.2802 | 17.8161  |
| SmallVesselStroke | s_Dorea_longicatena       | Simple mode               | 21 | -0.2065 | 0.2247 | 0.3690 | 0.0520  | 0.0409 | 0.2185 | 23.1761 | 0.2802 | 17.8161  |
| SmallVesselStroke | s_Dorea_longicatena       | Weighted mode             | 21 | -0.2188 | 0.1961 | 0.2778 | 0.0520  | 0.0409 | 0.2185 | 23.1761 | 0.2802 | 17.8161  |
| SmallVesselStroke | s_Eggerthella_lenta       | MR Egger                  | 21 | -0.4982 | 0.6144 | 0.4275 | 0.0448  | 0.0730 | 0.5468 | 23.2516 | 0.2264 | 6.3273   |
| SmallVesselStroke | s_Eggerthella_lenta       | Weighted median           | 21 | 0.0294  | 0.2123 | 0.8899 | 0.0448  | 0.0730 | 0.5468 | 23.2516 | 0.2264 | 6.3273   |
| SmallVesselStroke | s_Eggerthella_lenta       | Inverse variance weighted | 21 | -0.1341 | 0.1561 | 0.3905 | 0.0448  | 0.0730 | 0.5468 | 23.2516 | 0.2264 | 6.3273   |
| SmallVesselStroke | s_Eggerthella_lenta       | Simple mode               | 21 | 0.3099  | 0.4317 | 0.4811 | 0.0448  | 0.0730 | 0.5468 | 23.2516 | 0.2264 | 6.3273   |
| SmallVesselStroke | s_Eggerthella_lenta       | Weighted mode             | 21 | 0.3188  | 0.4581 | 0.4945 | 0.0448  | 0.0730 | 0.5468 | 23.2516 | 0.2264 | 6.3273   |
| SmallVesselStroke | s_Enterobacter_aerogenes  | MR Egger                  | 21 | -0.1179 | 0.7818 | 0.8818 | 0.0020  | 0.0929 | 0.9828 | 21.3157 | 0.3196 | 2.8797   |
| SmallVesselStroke | s_Enterobacter_aerogenes  | Weighted median           | 21 | -0.2784 | 0.2779 | 0.3165 | 0.0020  | 0.0929 | 0.9828 | 21.3157 | 0.3196 | 2.8797   |
| SmallVesselStroke | s_Enterobacter_aerogenes  | Inverse variance weighted | 21 | -0.1014 | 0.1967 | 0.6061 | 0.0020  | 0.0929 | 0.9828 | 21.3157 | 0.3196 | 2.8797   |
| SmallVesselStroke | s_Enterobacter_aerogenes  | Simple mode               | 21 | -0.4159 | 0.5655 | 0.4706 | 0.0020  | 0.0929 | 0.9828 | 21.3157 | 0.3196 | 2.8797   |
| SmallVesselStroke | s_Enterobacter_aerogenes  | Weighted mode             | 21 | -0.4489 | 0.5582 | 0.4307 | 0.0020  | 0.0929 | 0.9828 | 21.3157 | 0.3196 | 2.8797   |
| SmallVesselStroke | s_Enterobacter_cloacae    | MR Egger                  | 21 | 0.0544  | 0.6762 | 0.9368 | 0.0127  | 0.0803 | 0.8758 | 19.3528 | 0.4344 | 13.0411  |
| SmallVesselStroke | s_Enterobacter_cloacae    | Weighted median           | 21 | 0.0628  | 0.2519 | 0.8031 | 0.0127  | 0.0803 | 0.8758 | 19.3528 | 0.4344 | 13.0411  |
| SmallVesselStroke | s_Enterobacter_cloacae    | Inverse variance weighted | 21 | 0.1578  | 0.1729 | 0.3613 | 0.0127  | 0.0803 | 0.8758 | 19.3528 | 0.4344 | 13.0411  |
| SmallVesselStroke | s_Enterobacter_cloacae    | Simple mode               | 21 | -0.2060 | 0.4841 | 0.6750 | 0.0127  | 0.0803 | 0.8758 | 19.3528 | 0.4344 | 13.0411  |
| SmallVesselStroke | s_Enterobacter_cloacae    | Weighted mode             | 21 | -0.0906 | 0.4499 | 0.8424 | 0.0127  | 0.0803 | 0.8758 | 19.3528 | 0.4344 | 13.0411  |
| SmallVesselStroke | s_Enterococcus_faecalis   | MR Egger                  | 21 | -0.2069 | 0.2881 | 0.4814 | 0.0327  | 0.0342 | 0.3513 | 22.8126 | 0.2457 | 47.9242  |
| SmallVesselStroke | s_Enterococcus_faecalis   | Weighted median           | 21 | -0.0149 | 0.1008 | 0.8821 | 0.0327  | 0.0342 | 0.3513 | 22.8126 | 0.2457 | 47.9242  |
| SmallVesselStroke | s_Enterococcus_faecalis   | Inverse variance weighted | 21 | 0.0591  | 0.0742 | 0.4256 | 0.0327  | 0.0342 | 0.3513 | 22.8126 | 0.2457 | 47.9242  |
| SmallVesselStroke | s_Enterococcus_faecalis   | Simple mode               | 21 | -0.0666 | 0.1988 | 0.7412 | 0.0327  | 0.0342 | 0.3513 | 22.8126 | 0.2457 | 47.9242  |
| SmallVesselStroke | s_Enterococcus_faecalis   | Weighted mode             | 21 | -0.0756 | 0.2092 | 0.7216 | 0.0327  | 0.0342 | 0.3513 | 22.8126 | 0.2457 | 47.9242  |
| SmallVesselStroke | s_Enterococcus_faecium    | MR Egger                  | 21 | -0.3434 | 0.3064 | 0.2764 | 0.0452  | 0.0364 | 0.2293 | 28.1550 | 0.1058 | 36.9238  |
| SmallVesselStroke | s_Enterococcus_faecium    | Weighted median           | 21 | -0.0694 | 0.1027 | 0.4992 | 0.0452  | 0.0364 | 0.2293 | 28.1550 | 0.1058 | 36.9238  |
| SmallVesselStroke | s_Enterococcus_faecium    | Inverse variance weighted | 21 | 0.0243  | 0.0801 | 0.7617 | 0.0452  | 0.0364 | 0.2293 | 28.1550 | 0.1058 | 36.9238  |
| SmallVesselStroke | s_Enterococcus_faecium    | Simple mode               | 21 | -0.1838 | 0.2235 | 0.4206 | 0.0452  | 0.0364 | 0.2293 | 28.1550 | 0.1058 | 36.9238  |
| SmallVesselStroke | s_Enterococcus_faecium    | Weighted mode             | 21 | -0.1512 | 0.2022 | 0.4633 | 0.0452  | 0.0364 | 0.2293 | 28.1550 | 0.1058 | 36.9238  |
| SmallVesselStroke | s_Escherichia_coli        | MR Egger                  | 21 | -0.2517 | 0.5848 | 0.6718 | 0.0208  | 0.0695 | 0.7674 | 22.5661 | 0.2570 | 14.2384  |
| SmallVesselStroke | s_Escherichia_coli        | Weighted median           | 21 | 0.0129  | 0.1985 | 0.9483 | 0.0208  | 0.0695 | 0.7674 | 22.5661 | 0.2570 | 14.2384  |
| SmallVesselStroke | s_Escherichia_coli        | Inverse variance weighted | 21 | -0.0822 | 0.1474 | 0.5773 | 0.0208  | 0.0695 | 0.7674 | 22.5661 | 0.2570 | 14.2384  |
| SmallVesselStroke | s_Escherichia_coli        | Simple mode               | 21 | -0.2217 | 0.3489 | 0.5322 | 0.0208  | 0.0695 | 0.7674 | 22.5661 | 0.2570 | 14.2384  |
| SmallVesselStroke | s_Escherichia_coli        | Weighted mode             | 21 | -0.1584 | 0.3315 | 0.6379 | 0.0208  | 0.0695 | 0.7674 | 22.5661 | 0.2570 | 14.2384  |
| SmallVesselStroke | s_Eubacterium_biforme     | MR Egger                  | 21 | -0.3559 | 0.6183 | 0.5716 | 0.0431  | 0.0735 | 0.5639 | 29.0624 | 0.0650 | 8.8487   |
| SmallVesselStroke | s_Eubacterium_biforme     | Weighted median           | 21 | -0.0704 | 0.2024 | 0.7281 | 0.0431  | 0.0735 | 0.5639 | 29.0624 | 0.0650 | 8.8487   |

|                   |                                |                           |    |         |        |        |         |        |        |         |        |         |
|-------------------|--------------------------------|---------------------------|----|---------|--------|--------|---------|--------|--------|---------|--------|---------|
| SmallVesselStroke | s_Eubacterium_biforme          | Inverse variance weighted | 21 | -0.0050 | 0.1569 | 0.9744 | 0.0431  | 0.0735 | 0.5639 | 29.0624 | 0.0650 | 8.8487  |
| SmallVesselStroke | s_Eubacterium_biforme          | Simple mode               | 21 | 0.0015  | 0.4164 | 0.9972 | 0.0431  | 0.0735 | 0.5639 | 29.0624 | 0.0650 | 8.8487  |
| SmallVesselStroke | s_Eubacterium_biforme          | Weighted mode             | 21 | -0.0310 | 0.4232 | 0.9423 | 0.0431  | 0.0735 | 0.5639 | 29.0624 | 0.0650 | 8.8487  |
| SmallVesselStroke | s_Eubacterium_cylindroides     | MR Egger                  | 21 | 0.0517  | 0.2828 | 0.8570 | -0.0111 | 0.0336 | 0.7444 | 21.9413 | 0.2872 | 71.7374 |
| SmallVesselStroke | s_Eubacterium_cylindroides     | Weighted median           | 21 | -0.1263 | 0.0949 | 0.1833 | -0.0111 | 0.0336 | 0.7444 | 21.9413 | 0.2872 | 71.7374 |
| SmallVesselStroke | s_Eubacterium_cylindroides     | Inverse variance weighted | 21 | -0.0387 | 0.0713 | 0.5872 | -0.0111 | 0.0336 | 0.7444 | 21.9413 | 0.2872 | 71.7374 |
| SmallVesselStroke | s_Eubacterium_cylindroides     | Simple mode               | 21 | -0.2406 | 0.1617 | 0.1523 | -0.0111 | 0.0336 | 0.7444 | 21.9413 | 0.2872 | 71.7374 |
| SmallVesselStroke | s_Eubacterium_cylindroides     | Weighted mode             | 21 | -0.2139 | 0.1616 | 0.2005 | -0.0111 | 0.0336 | 0.7444 | 21.9413 | 0.2872 | 71.7374 |
| SmallVesselStroke | s_Eubacterium_dolichum         | MR Egger                  | 21 | 0.1864  | 0.3870 | 0.6354 | -0.0215 | 0.0460 | 0.6457 | 32.9327 | 0.0245 | 45.1045 |
| SmallVesselStroke | s_Eubacterium_dolichum         | Weighted median           | 21 | 0.0120  | 0.1143 | 0.9166 | -0.0215 | 0.0460 | 0.6457 | 32.9327 | 0.0245 | 45.1045 |
| SmallVesselStroke | s_Eubacterium_dolichum         | Inverse variance weighted | 21 | 0.0118  | 0.0979 | 0.9040 | -0.0215 | 0.0460 | 0.6457 | 32.9327 | 0.0245 | 45.1045 |
| SmallVesselStroke | s_Eubacterium_dolichum         | Simple mode               | 21 | -0.0529 | 0.2319 | 0.8219 | -0.0215 | 0.0460 | 0.6457 | 32.9327 | 0.0245 | 45.1045 |
| SmallVesselStroke | s_Eubacterium_dolichum         | Weighted mode             | 21 | 0.0356  | 0.2263 | 0.8765 | -0.0215 | 0.0460 | 0.6457 | 32.9327 | 0.0245 | 45.1045 |
| SmallVesselStroke | s_Eubacterium_eligens          | MR Egger                  | 21 | -0.9352 | 0.6134 | 0.1438 | 0.1297  | 0.0729 | 0.0910 | 22.0660 | 0.3369 | 2.1003  |
| SmallVesselStroke | s_Eubacterium_eligens          | Weighted median           | 21 | 0.1302  | 0.2331 | 0.5764 | 0.1297  | 0.0729 | 0.0910 | 22.0660 | 0.3369 | 2.1003  |
| SmallVesselStroke | s_Eubacterium_eligens          | Inverse variance weighted | 21 | 0.1198  | 0.1663 | 0.4712 | 0.1297  | 0.0729 | 0.0910 | 22.0660 | 0.3369 | 2.1003  |
| SmallVesselStroke | s_Eubacterium_eligens          | Simple mode               | 21 | 0.4172  | 0.4499 | 0.3649 | 0.1297  | 0.0729 | 0.0910 | 22.0660 | 0.3369 | 2.1003  |
| SmallVesselStroke | s_Eubacterium_eligens          | Weighted mode             | 21 | 0.4064  | 0.4257 | 0.3512 | 0.1297  | 0.0729 | 0.0910 | 22.0660 | 0.3369 | 2.1003  |
| SmallVesselStroke | s_Eubacterium_hallii           | MR Egger                  | 21 | -0.4627 | 0.4016 | 0.2635 | 0.0367  | 0.0477 | 0.4514 | 23.5324 | 0.2147 | 9.1902  |
| SmallVesselStroke | s_Eubacterium_hallii           | Weighted median           | 21 | -0.1618 | 0.1326 | 0.2223 | 0.0367  | 0.0477 | 0.4514 | 23.5324 | 0.2147 | 9.1902  |
| SmallVesselStroke | s_Eubacterium_hallii           | Inverse variance weighted | 21 | -0.1644 | 0.1026 | 0.1091 | 0.0367  | 0.0477 | 0.4514 | 23.5324 | 0.2147 | 9.1902  |
| SmallVesselStroke | s_Eubacterium_hallii           | Simple mode               | 21 | -0.1617 | 0.2626 | 0.5451 | 0.0367  | 0.0477 | 0.4514 | 23.5324 | 0.2147 | 9.1902  |
| SmallVesselStroke | s_Eubacterium_hallii           | Weighted mode             | 21 | -0.1936 | 0.2404 | 0.4302 | 0.0367  | 0.0477 | 0.4514 | 23.5324 | 0.2147 | 9.1902  |
| SmallVesselStroke | s_Eubacterium_limosum          | MR Egger                  | 21 | -0.0882 | 0.4139 | 0.8336 | 0.0267  | 0.0492 | 0.5929 | 31.8991 | 0.0321 | 20.5777 |
| SmallVesselStroke | s_Eubacterium_limosum          | Weighted median           | 21 | 0.0513  | 0.1292 | 0.6915 | 0.0267  | 0.0492 | 0.5929 | 31.8991 | 0.0321 | 20.5777 |
| SmallVesselStroke | s_Eubacterium_limosum          | Inverse variance weighted | 21 | 0.1293  | 0.1049 | 0.2177 | 0.0267  | 0.0492 | 0.5929 | 31.8991 | 0.0321 | 20.5777 |
| SmallVesselStroke | s_Eubacterium_limosum          | Simple mode               | 21 | -0.1213 | 0.2522 | 0.6359 | 0.0267  | 0.0492 | 0.5929 | 31.8991 | 0.0321 | 20.5777 |
| SmallVesselStroke | s_Eubacterium_limosum          | Weighted mode             | 21 | -0.0255 | 0.2303 | 0.9129 | 0.0267  | 0.0492 | 0.5929 | 31.8991 | 0.0321 | 20.5777 |
| SmallVesselStroke | s_Eubacterium_rectale          | MR Egger                  | 21 | 0.3129  | 0.4224 | 0.4679 | -0.0127 | 0.0502 | 0.8031 | 19.2690 | 0.4397 | 18.5187 |
| SmallVesselStroke | s_Eubacterium_rectale          | Weighted median           | 21 | 0.2166  | 0.1531 | 0.1571 | -0.0127 | 0.0502 | 0.8031 | 19.2690 | 0.4397 | 18.5187 |
| SmallVesselStroke | s_Eubacterium_rectale          | Inverse variance weighted | 21 | 0.2097  | 0.1083 | 0.0527 | -0.0127 | 0.0502 | 0.8031 | 19.2690 | 0.4397 | 18.5187 |
| SmallVesselStroke | s_Eubacterium_rectale          | Simple mode               | 21 | 0.2216  | 0.3013 | 0.4707 | -0.0127 | 0.0502 | 0.8031 | 19.2690 | 0.4397 | 18.5187 |
| SmallVesselStroke | s_Eubacterium_rectale          | Weighted mode             | 21 | 0.1543  | 0.2960 | 0.6079 | -0.0127 | 0.0502 | 0.8031 | 19.2690 | 0.4397 | 18.5187 |
| SmallVesselStroke | s_Eubacterium_saburreum        | MR Egger                  | 21 | -0.7018 | 0.4230 | 0.1135 | 0.0817  | 0.0503 | 0.1204 | 21.7325 | 0.3552 | 9.0797  |
| SmallVesselStroke | s_Eubacterium_saburreum        | Weighted median           | 21 | 0.0226  | 0.1506 | 0.8809 | 0.0817  | 0.0503 | 0.1204 | 21.7325 | 0.3552 | 9.0797  |
| SmallVesselStroke | s_Eubacterium_saburreum        | Inverse variance weighted | 21 | -0.0372 | 0.1136 | 0.7433 | 0.0817  | 0.0503 | 0.1204 | 21.7325 | 0.3552 | 9.0797  |
| SmallVesselStroke | s_Eubacterium_saburreum        | Simple mode               | 21 | 0.1010  | 0.2858 | 0.7275 | 0.0817  | 0.0503 | 0.1204 | 21.7325 | 0.3552 | 9.0797  |
| SmallVesselStroke | s_Eubacterium_saburreum        | Weighted mode             | 21 | 0.0612  | 0.2482 | 0.8077 | 0.0817  | 0.0503 | 0.1204 | 21.7325 | 0.3552 | 9.0797  |
| SmallVesselStroke | s_Eubacterium_siraeum          | MR Egger                  | 21 | -0.2030 | 0.5158 | 0.6982 | 0.0176  | 0.0613 | 0.7766 | 19.9650 | 0.3967 | 13.7262 |
| SmallVesselStroke | s_Eubacterium_siraeum          | Weighted median           | 21 | -0.0239 | 0.1804 | 0.8946 | 0.0176  | 0.0613 | 0.7766 | 19.9650 | 0.3967 | 13.7262 |
| SmallVesselStroke | s_Eubacterium_siraeum          | Inverse variance weighted | 21 | -0.0597 | 0.1300 | 0.6463 | 0.0176  | 0.0613 | 0.7766 | 19.9650 | 0.3967 | 13.7262 |
| SmallVesselStroke | s_Eubacterium_siraeum          | Simple mode               | 21 | -0.4243 | 0.3195 | 0.1991 | 0.0176  | 0.0613 | 0.7766 | 19.9650 | 0.3967 | 13.7262 |
| SmallVesselStroke | s_Eubacterium_siraeum          | Weighted mode             | 21 | -0.3826 | 0.3208 | 0.2470 | 0.0176  | 0.0613 | 0.7766 | 19.9650 | 0.3967 | 13.7262 |
| SmallVesselStroke | s_Eubacterium_ventriosum       | MR Egger                  | 21 | -0.0775 | 0.4415 | 0.8626 | 0.0024  | 0.0525 | 0.9635 | 29.8464 | 0.0538 | 7.4292  |
| SmallVesselStroke | s_Eubacterium_ventriosum       | Weighted median           | 21 | 0.0264  | 0.1339 | 0.8439 | 0.0024  | 0.0525 | 0.9635 | 29.8464 | 0.0538 | 7.4292  |
| SmallVesselStroke | s_Eubacterium_ventriosum       | Inverse variance weighted | 21 | -0.0577 | 0.1111 | 0.6036 | 0.0024  | 0.0525 | 0.9635 | 29.8464 | 0.0538 | 7.4292  |
| SmallVesselStroke | s_Eubacterium_ventriosum       | Simple mode               | 21 | 0.0590  | 0.2460 | 0.8128 | 0.0024  | 0.0525 | 0.9635 | 29.8464 | 0.0538 | 7.4292  |
| SmallVesselStroke | s_Eubacterium_ventriosum       | Weighted mode             | 21 | 0.1198  | 0.2460 | 0.6317 | 0.0024  | 0.0525 | 0.9635 | 29.8464 | 0.0538 | 7.4292  |
| SmallVesselStroke | s_Faecalibacterium_prausnitzii | MR Egger                  | 21 | 0.5760  | 0.4799 | 0.2448 | -0.0603 | 0.0570 | 0.3033 | 28.0221 | 0.1089 | 13.3179 |
| SmallVesselStroke | s_Faecalibacterium_prausnitzii | Weighted median           | 21 | 0.0750  | 0.1531 | 0.6239 | -0.0603 | 0.0570 | 0.3033 | 28.0221 | 0.1089 | 13.3179 |
| SmallVesselStroke | s_Faecalibacterium_prausnitzii | Inverse variance weighted | 21 | 0.0855  | 0.1242 | 0.4911 | -0.0603 | 0.0570 | 0.3033 | 28.0221 | 0.1089 | 13.3179 |
| SmallVesselStroke | s_Faecalibacterium_prausnitzii | Simple mode               | 21 | -0.0857 | 0.2854 | 0.7670 | -0.0603 | 0.0570 | 0.3033 | 28.0221 | 0.1089 | 13.3179 |
| SmallVesselStroke | s_Faecalibacterium_prausnitzii | Weighted mode             | 21 | -0.0356 | 0.2665 | 0.8951 | -0.0603 | 0.0570 | 0.3033 | 28.0221 | 0.1089 | 13.3179 |
| SmallVesselStroke | s_Gemella_sanguinis            | MR Egger                  | 21 | 0.4636  | 0.4700 | 0.3363 | -0.0461 | 0.0558 | 0.4197 | 28.3518 | 0.0769 | 8.6441  |
| SmallVesselStroke | s_Gemella_sanguinis            | Weighted median           | 21 | 0.1441  | 0.1449 | 0.3200 | -0.0461 | 0.0558 | 0.4197 | 28.3518 | 0.0769 | 8.6441  |
| SmallVesselStroke | s_Gemella_sanguinis            | Inverse variance weighted | 21 | 0.0891  | 0.1204 | 0.4591 | -0.0461 | 0.0558 | 0.4197 | 28.3518 | 0.0769 | 8.6441  |
| SmallVesselStroke | s_Gemella_sanguinis            | Simple mode               | 21 | 0.2349  | 0.3096 | 0.4568 | -0.0461 | 0.0558 | 0.4197 | 28.3518 | 0.0769 | 8.6441  |
| SmallVesselStroke | s_Gemella_sanguinis            | Weighted mode             | 21 | 0.2694  | 0.2787 | 0.3453 | -0.0461 | 0.0558 | 0.4197 | 28.3518 | 0.0769 | 8.6441  |
| SmallVesselStroke | s_Granulicatella_adiacens      | MR Egger                  | 21 | 0.2898  | 0.3350 | 0.3977 | -0.0254 | 0.0398 | 0.5313 | 22.9597 | 0.2391 | 16.5090 |
| SmallVesselStroke | s_Granulicatella_adiacens      | Weighted median           | 21 | 0.0901  | 0.1073 | 0.4009 | -0.0254 | 0.0398 | 0.5313 | 22.9597 | 0.2391 | 16.5090 |
| SmallVesselStroke | s_Granulicatella_adiacens      | Inverse variance weighted | 21 | 0.0835  | 0.0852 | 0.3272 | -0.0254 | 0.0398 | 0.5313 | 22.9597 | 0.2391 | 16.5090 |

|                   |                                  |                           |    |         |        |        |         |        |        |         |        |         |
|-------------------|----------------------------------|---------------------------|----|---------|--------|--------|---------|--------|--------|---------|--------|---------|
| SmallVesselStroke | s_Granulicatella_adiacens        | Simple mode               | 21 | 0.0712  | 0.1951 | 0.7189 | -0.0254 | 0.0398 | 0.5313 | 22.9597 | 0.2391 | 16.5090 |
| SmallVesselStroke | s_Granulicatella_adiacens        | Weighted mode             | 21 | 0.0852  | 0.1903 | 0.6592 | -0.0254 | 0.0398 | 0.5313 | 22.9597 | 0.2391 | 16.5090 |
| SmallVesselStroke | s_Haemophilus_influenzae         | MR Egger                  | 21 | -1.2867 | 0.6441 | 0.0603 | 0.1751  | 0.0765 | 0.0338 | 23.2242 | 0.2779 | 9.5150  |
| SmallVesselStroke | s_Haemophilus_influenzae         | Weighted median           | 21 | 0.0123  | 0.2384 | 0.9589 | 0.1751  | 0.0765 | 0.0338 | 23.2242 | 0.2779 | 9.5150  |
| SmallVesselStroke | s_Haemophilus_influenzae         | Inverse variance weighted | 21 | 0.1372  | 0.1791 | 0.4437 | 0.1751  | 0.0765 | 0.0338 | 23.2242 | 0.2779 | 9.5150  |
| SmallVesselStroke | s_Haemophilus_influenzae         | Simple mode               | 21 | -0.1598 | 0.4358 | 0.7177 | 0.1751  | 0.0765 | 0.0338 | 23.2242 | 0.2779 | 9.5150  |
| SmallVesselStroke | s_Haemophilus_influenzae         | Weighted mode             | 21 | -0.1270 | 0.4425 | 0.7772 | 0.1751  | 0.0765 | 0.0338 | 23.2242 | 0.2779 | 9.5150  |
| SmallVesselStroke | s_Haemophilus_pittmaniae         | MR Egger                  | 21 | -1.0164 | 0.6484 | 0.1335 | 0.1460  | 0.0770 | 0.0734 | 21.5773 | 0.3639 | 7.8007  |
| SmallVesselStroke | s_Haemophilus_pittmaniae         | Weighted median           | 21 | 0.0956  | 0.2371 | 0.6870 | 0.1460  | 0.0770 | 0.0734 | 21.5773 | 0.3639 | 7.8007  |
| SmallVesselStroke | s_Haemophilus_pittmaniae         | Inverse variance weighted | 21 | 0.1707  | 0.1738 | 0.3260 | 0.1460  | 0.0770 | 0.0734 | 21.5773 | 0.3639 | 7.8007  |
| SmallVesselStroke | s_Haemophilus_pittmaniae         | Simple mode               | 21 | 0.0446  | 0.4532 | 0.9226 | 0.1460  | 0.0770 | 0.0734 | 21.5773 | 0.3639 | 7.8007  |
| SmallVesselStroke | s_Haemophilus_pittmaniae         | Weighted mode             | 21 | 0.0446  | 0.4296 | 0.9183 | 0.1460  | 0.0770 | 0.0734 | 21.5773 | 0.3639 | 7.8007  |
| SmallVesselStroke | s_Holdemania_filiformis          | MR Egger                  | 21 | -0.0246 | 0.3265 | 0.9408 | 0.0088  | 0.0388 | 0.8236 | 14.6781 | 0.7428 | 50.0754 |
| SmallVesselStroke | s_Holdemania_filiformis          | Weighted median           | 21 | 0.0732  | 0.1125 | 0.5154 | 0.0088  | 0.0388 | 0.8236 | 14.6781 | 0.7428 | 50.0754 |
| SmallVesselStroke | s_Holdemania_filiformis          | Inverse variance weighted | 21 | 0.0467  | 0.0842 | 0.5791 | 0.0088  | 0.0388 | 0.8236 | 14.6781 | 0.7428 | 50.0754 |
| SmallVesselStroke | s_Holdemania_filiformis          | Simple mode               | 21 | 0.0890  | 0.2202 | 0.6902 | 0.0088  | 0.0388 | 0.8236 | 14.6781 | 0.7428 | 50.0754 |
| SmallVesselStroke | s_Holdemania_filiformis          | Weighted mode             | 21 | 0.0890  | 0.1860 | 0.6373 | 0.0088  | 0.0388 | 0.8236 | 14.6781 | 0.7428 | 50.0754 |
| SmallVesselStroke | s_Klebsiella_oxytoca             | MR Egger                  | 21 | 0.2099  | 0.6575 | 0.7530 | -0.0143 | 0.0781 | 0.8569 | 19.0104 | 0.4562 | 8.7243  |
| SmallVesselStroke | s_Klebsiella_oxytoca             | Weighted median           | 21 | 0.0740  | 0.2439 | 0.7615 | -0.0143 | 0.0781 | 0.8569 | 19.0104 | 0.4562 | 8.7243  |
| SmallVesselStroke | s_Klebsiella_oxytoca             | Inverse variance weighted | 21 | 0.0938  | 0.1696 | 0.5801 | -0.0143 | 0.0781 | 0.8569 | 19.0104 | 0.4562 | 8.7243  |
| SmallVesselStroke | s_Klebsiella_oxytoca             | Simple mode               | 21 | -0.0150 | 0.4641 | 0.9745 | -0.0143 | 0.0781 | 0.8569 | 19.0104 | 0.4562 | 8.7243  |
| SmallVesselStroke | s_Klebsiella_oxytoca             | Weighted mode             | 21 | 0.0137  | 0.3997 | 0.9729 | -0.0143 | 0.0781 | 0.8569 | 19.0104 | 0.4562 | 8.7243  |
| SmallVesselStroke | s_Lachnospiraceae_oral_taxon_107 | MR Egger                  | 21 | 0.0373  | 0.3880 | 0.9244 | -0.0007 | 0.0461 | 0.9886 | 35.5162 | 0.0121 | 25.2759 |
| SmallVesselStroke | s_Lachnospiraceae_oral_taxon_107 | Weighted median           | 21 | -0.0297 | 0.1129 | 0.7923 | -0.0007 | 0.0461 | 0.9886 | 35.5162 | 0.0121 | 25.2759 |
| SmallVesselStroke | s_Lachnospiraceae_oral_taxon_107 | Inverse variance weighted | 21 | 0.0319  | 0.0976 | 0.7438 | -0.0007 | 0.0461 | 0.9886 | 35.5162 | 0.0121 | 25.2759 |
| SmallVesselStroke | s_Lachnospiraceae_oral_taxon_107 | Simple mode               | 21 | -0.1633 | 0.2624 | 0.5408 | -0.0007 | 0.0461 | 0.9886 | 35.5162 | 0.0121 | 25.2759 |
| SmallVesselStroke | s_Lachnospiraceae_oral_taxon_107 | Weighted mode             | 21 | -0.1633 | 0.2590 | 0.5356 | -0.0007 | 0.0461 | 0.9886 | 35.5162 | 0.0121 | 25.2759 |
| SmallVesselStroke | s_Lactobacillus_ruminis          | MR Egger                  | 21 | -0.3531 | 0.3496 | 0.3251 | 0.0387  | 0.0415 | 0.3637 | 17.7353 | 0.5402 | 15.4845 |
| SmallVesselStroke | s_Lactobacillus_ruminis          | Weighted median           | 21 | 0.0275  | 0.1254 | 0.8268 | 0.0387  | 0.0415 | 0.3637 | 17.7353 | 0.5402 | 15.4845 |
| SmallVesselStroke | s_Lactobacillus_ruminis          | Inverse variance weighted | 21 | -0.0388 | 0.0902 | 0.6674 | 0.0387  | 0.0415 | 0.3637 | 17.7353 | 0.5402 | 15.4845 |
| SmallVesselStroke | s_Lactobacillus_ruminis          | Simple mode               | 21 | 0.1581  | 0.2161 | 0.4730 | 0.0387  | 0.0415 | 0.3637 | 17.7353 | 0.5402 | 15.4845 |
| SmallVesselStroke | s_Lactobacillus_ruminis          | Weighted mode             | 21 | 0.1160  | 0.2080 | 0.5833 | 0.0387  | 0.0415 | 0.3637 | 17.7353 | 0.5402 | 15.4845 |
| SmallVesselStroke | s_Marvinbryantia_formatexigens   | MR Egger                  | 21 | -0.3695 | 0.4709 | 0.4424 | 0.0523  | 0.0559 | 0.3613 | 35.8463 | 0.0160 | 2.5770  |
| SmallVesselStroke | s_Marvinbryantia_formatexigens   | Weighted median           | 21 | 0.0482  | 0.1345 | 0.7201 | 0.0523  | 0.0559 | 0.3613 | 35.8463 | 0.0160 | 2.5770  |
| SmallVesselStroke | s_Marvinbryantia_formatexigens   | Inverse variance weighted | 21 | 0.0561  | 0.1212 | 0.6436 | 0.0523  | 0.0559 | 0.3613 | 35.8463 | 0.0160 | 2.5770  |
| SmallVesselStroke | s_Marvinbryantia_formatexigens   | Simple mode               | 21 | 0.1078  | 0.2399 | 0.6578 | 0.0523  | 0.0559 | 0.3613 | 35.8463 | 0.0160 | 2.5770  |
| SmallVesselStroke | s_Marvinbryantia_formatexigens   | Weighted mode             | 21 | 0.1078  | 0.2125 | 0.6174 | 0.0523  | 0.0559 | 0.3613 | 35.8463 | 0.0160 | 2.5770  |
| SmallVesselStroke | s_Megasphaera_elsdenii           | MR Egger                  | 21 | -0.4552 | 0.7706 | 0.5617 | 0.1075  | 0.0915 | 0.2547 | 15.6190 | 0.7400 | 2.2646  |
| SmallVesselStroke | s_Megasphaera_elsdenii           | Weighted median           | 21 | 0.4088  | 0.2726 | 0.1337 | 0.1075  | 0.0915 | 0.2547 | 15.6190 | 0.7400 | 2.2646  |
| SmallVesselStroke | s_Megasphaera_elsdenii           | Inverse variance weighted | 21 | 0.4193  | 0.1988 | 0.0350 | 0.1075  | 0.0915 | 0.2547 | 15.6190 | 0.7400 | 2.2646  |
| SmallVesselStroke | s_Megasphaera_elsdenii           | Simple mode               | 21 | 0.7063  | 0.5177 | 0.1877 | 0.1075  | 0.0915 | 0.2547 | 15.6190 | 0.7400 | 2.2646  |
| SmallVesselStroke | s_Megasphaera_elsdenii           | Weighted mode             | 21 | 0.6409  | 0.5134 | 0.2263 | 0.1075  | 0.0915 | 0.2547 | 15.6190 | 0.7400 | 2.2646  |
| SmallVesselStroke | s_Megasphaera_genomosp._type_1   | MR Egger                  | 21 | -1.1966 | 0.7593 | 0.1316 | 0.1629  | 0.0901 | 0.0865 | 31.0687 | 0.0543 | 4.3261  |
| SmallVesselStroke | s_Megasphaera_genomosp._type_1   | Weighted median           | 21 | 0.1283  | 0.2377 | 0.5894 | 0.1629  | 0.0901 | 0.0865 | 31.0687 | 0.0543 | 4.3261  |
| SmallVesselStroke | s_Megasphaera_genomosp._type_1   | Inverse variance weighted | 21 | 0.1300  | 0.2054 | 0.5268 | 0.1629  | 0.0901 | 0.0865 | 31.0687 | 0.0543 | 4.3261  |
| SmallVesselStroke | s_Megasphaera_genomosp._type_1   | Simple mode               | 21 | 0.2076  | 0.4298 | 0.6343 | 0.1629  | 0.0901 | 0.0865 | 31.0687 | 0.0543 | 4.3261  |
| SmallVesselStroke | s_Megasphaera_genomosp._type_1   | Weighted mode             | 21 | 0.1860  | 0.4411 | 0.6777 | 0.1629  | 0.0901 | 0.0865 | 31.0687 | 0.0543 | 4.3261  |
| SmallVesselStroke | s_Megasphaera_micronuciformis    | MR Egger                  | 21 | 0.2042  | 0.5035 | 0.6896 | -0.0214 | 0.0598 | 0.7242 | 28.1061 | 0.0814 | 5.3745  |
| SmallVesselStroke | s_Megasphaera_micronuciformis    | Weighted median           | 21 | 0.0531  | 0.1530 | 0.7283 | -0.0214 | 0.0598 | 0.7242 | 28.1061 | 0.0814 | 5.3745  |
| SmallVesselStroke | s_Megasphaera_micronuciformis    | Inverse variance weighted | 21 | 0.0300  | 0.1271 | 0.8134 | -0.0214 | 0.0598 | 0.7242 | 28.1061 | 0.0814 | 5.3745  |
| SmallVesselStroke | s_Megasphaera_micronuciformis    | Simple mode               | 21 | 0.0192  | 0.2804 | 0.9461 | -0.0214 | 0.0598 | 0.7242 | 28.1061 | 0.0814 | 5.3745  |
| SmallVesselStroke | s_Megasphaera_micronuciformis    | Weighted mode             | 21 | 0.0020  | 0.2699 | 0.9943 | -0.0214 | 0.0598 | 0.7242 | 28.1061 | 0.0814 | 5.3745  |
| SmallVesselStroke | s_Mitsuokella_multacida          | MR Egger                  | 21 | -0.0443 | 0.7495 | 0.9535 | 0.0449  | 0.0890 | 0.6194 | 29.6252 | 0.0568 | 11.0794 |
| SmallVesselStroke | s_Mitsuokella_multacida          | Weighted median           | 21 | 0.4008  | 0.2213 | 0.0702 | 0.0449  | 0.0890 | 0.6194 | 29.6252 | 0.0568 | 11.0794 |
| SmallVesselStroke | s_Mitsuokella_multacida          | Inverse variance weighted | 21 | 0.3213  | 0.1897 | 0.0904 | 0.0449  | 0.0890 | 0.6194 | 29.6252 | 0.0568 | 11.0794 |
| SmallVesselStroke | s_Mitsuokella_multacida          | Simple mode               | 21 | 0.7982  | 0.4386 | 0.0837 | 0.0449  | 0.0890 | 0.6194 | 29.6252 | 0.0568 | 11.0794 |
| SmallVesselStroke | s_Mitsuokella_multacida          | Weighted mode             | 21 | 0.7752  | 0.4031 | 0.0689 | 0.0449  | 0.0890 | 0.6194 | 29.6252 | 0.0568 | 11.0794 |
| SmallVesselStroke | s_Mobiluncus_curtisii            | MR Egger                  | 21 | -0.8874 | 0.4561 | 0.0666 | 0.0987  | 0.0542 | 0.0843 | 19.2989 | 0.5025 | 1.4044  |
| SmallVesselStroke | s_Mobiluncus_curtisii            | Weighted median           | 21 | -0.0689 | 0.1604 | 0.6675 | 0.0987  | 0.0542 | 0.0843 | 19.2989 | 0.5025 | 1.4044  |
| SmallVesselStroke | s_Mobiluncus_curtisii            | Inverse variance weighted | 21 | -0.0848 | 0.1178 | 0.4715 | 0.0987  | 0.0542 | 0.0843 | 19.2989 | 0.5025 | 1.4044  |
| SmallVesselStroke | s_Mobiluncus_curtisii            | Simple mode               | 21 | -0.0575 | 0.2668 | 0.8315 | 0.0987  | 0.0542 | 0.0843 | 19.2989 | 0.5025 | 1.4044  |

|                   |                                      |                           |    |         |        |        |         |        |        |         |        |          |
|-------------------|--------------------------------------|---------------------------|----|---------|--------|--------|---------|--------|--------|---------|--------|----------|
| SmallVesselStroke | s_Mobiluncus_curtisii                | Weighted mode             | 21 | -0.0575 | 0.2417 | 0.8143 | 0.0987  | 0.0542 | 0.0843 | 19.2989 | 0.5025 | 1.4044   |
| SmallVesselStroke | s_Oribacterium_sinus                 | MR Egger                  | 21 | -0.3352 | 0.3137 | 0.2987 | 0.0403  | 0.0373 | 0.2934 | 32.6289 | 0.0370 | 78.8858  |
| SmallVesselStroke | s_Oribacterium_sinus                 | Weighted median           | 21 | -0.0186 | 0.0954 | 0.8453 | 0.0403  | 0.0373 | 0.2934 | 32.6289 | 0.0370 | 78.8858  |
| SmallVesselStroke | s_Oribacterium_sinus                 | Inverse variance weighted | 21 | -0.0077 | 0.0813 | 0.9247 | 0.0403  | 0.0373 | 0.2934 | 32.6289 | 0.0370 | 78.8858  |
| SmallVesselStroke | s_Oribacterium_sinus                 | Simple mode               | 21 | 0.0076  | 0.1727 | 0.9653 | 0.0403  | 0.0373 | 0.2934 | 32.6289 | 0.0370 | 78.8858  |
| SmallVesselStroke | s_Oribacterium_sinus                 | Weighted mode             | 21 | -0.0196 | 0.1633 | 0.9058 | 0.0403  | 0.0373 | 0.2934 | 32.6289 | 0.0370 | 78.8858  |
| SmallVesselStroke | s_Parabacteroides_distasonis         | MR Egger                  | 21 | 0.1253  | 0.2778 | 0.6569 | -0.0110 | 0.0330 | 0.7431 | 15.1165 | 0.7152 | 72.9328  |
| SmallVesselStroke | s_Parabacteroides_distasonis         | Weighted median           | 21 | 0.0429  | 0.0996 | 0.6667 | -0.0110 | 0.0330 | 0.7431 | 15.1165 | 0.7152 | 72.9328  |
| SmallVesselStroke | s_Parabacteroides_distasonis         | Inverse variance weighted | 21 | 0.0361  | 0.0717 | 0.6147 | -0.0110 | 0.0330 | 0.7431 | 15.1165 | 0.7152 | 72.9328  |
| SmallVesselStroke | s_Parabacteroides_distasonis         | Simple mode               | 21 | 0.0349  | 0.1767 | 0.8455 | -0.0110 | 0.0330 | 0.7431 | 15.1165 | 0.7152 | 72.9328  |
| SmallVesselStroke | s_Parabacteroides_distasonis         | Weighted mode             | 21 | 0.0428  | 0.1723 | 0.8065 | -0.0110 | 0.0330 | 0.7431 | 15.1165 | 0.7152 | 72.9328  |
| SmallVesselStroke | s_Parabacteroides_merdae             | MR Egger                  | 21 | 0.1017  | 0.5392 | 0.8524 | -0.0074 | 0.0641 | 0.9092 | 23.4853 | 0.2166 | 15.5375  |
| SmallVesselStroke | s_Parabacteroides_merdae             | Weighted median           | 21 | -0.0512 | 0.1765 | 0.7719 | -0.0074 | 0.0641 | 0.9092 | 23.4853 | 0.2166 | 15.5375  |
| SmallVesselStroke | s_Parabacteroides_merdae             | Inverse variance weighted | 21 | 0.0415  | 0.1357 | 0.7596 | -0.0074 | 0.0641 | 0.9092 | 23.4853 | 0.2166 | 15.5375  |
| SmallVesselStroke | s_Parabacteroides_merdae             | Simple mode               | 21 | -0.4160 | 0.3745 | 0.2799 | -0.0074 | 0.0641 | 0.9092 | 23.4853 | 0.2166 | 15.5375  |
| SmallVesselStroke | s_Parabacteroides_merdae             | Weighted mode             | 21 | -0.1397 | 0.3353 | 0.6813 | -0.0074 | 0.0641 | 0.9092 | 23.4853 | 0.2166 | 15.5375  |
| SmallVesselStroke | s_Parasutterella_excrementihominis   | MR Egger                  | 21 | -0.6935 | 0.8731 | 0.4368 | 0.0572  | 0.1037 | 0.5879 | 21.2944 | 0.3208 | 1.3192   |
| SmallVesselStroke | s_Parasutterella_excrementihominis   | Weighted median           | 21 | 0.2013  | 0.3075 | 0.5129 | 0.0572  | 0.1037 | 0.5879 | 21.2944 | 0.3208 | 1.3192   |
| SmallVesselStroke | s_Parasutterella_excrementihominis   | Inverse variance weighted | 21 | -0.2285 | 0.2213 | 0.3018 | 0.0572  | 0.1037 | 0.5879 | 21.2944 | 0.3208 | 1.3192   |
| SmallVesselStroke | s_Parasutterella_excrementihominis   | Simple mode               | 21 | 0.3491  | 0.6712 | 0.6087 | 0.0572  | 0.1037 | 0.5879 | 21.2944 | 0.3208 | 1.3192   |
| SmallVesselStroke | s_Parasutterella_excrementihominis   | Weighted mode             | 21 | 0.3740  | 0.5827 | 0.5282 | 0.0572  | 0.1037 | 0.5879 | 21.2944 | 0.3208 | 1.3192   |
| SmallVesselStroke | s_Peptoniphilus_lacrimalis           | MR Egger                  | 21 | -0.1646 | 0.6640 | 0.8068 | 0.0002  | 0.0789 | 0.9976 | 20.5906 | 0.3599 | 5.6325   |
| SmallVesselStroke | s_Peptoniphilus_lacrimalis           | Weighted median           | 21 | -0.1432 | 0.2327 | 0.5382 | 0.0002  | 0.0789 | 0.9976 | 20.5906 | 0.3599 | 5.6325   |
| SmallVesselStroke | s_Peptoniphilus_lacrimalis           | Inverse variance weighted | 21 | -0.1627 | 0.1670 | 0.3301 | 0.0002  | 0.0789 | 0.9976 | 20.5906 | 0.3599 | 5.6325   |
| SmallVesselStroke | s_Peptoniphilus_lacrimalis           | Simple mode               | 21 | -0.1583 | 0.3715 | 0.6745 | 0.0002  | 0.0789 | 0.9976 | 20.5906 | 0.3599 | 5.6325   |
| SmallVesselStroke | s_Peptoniphilus_lacrimalis           | Weighted mode             | 21 | -0.1770 | 0.3948 | 0.6588 | 0.0002  | 0.0789 | 0.9976 | 20.5906 | 0.3599 | 5.6325   |
| SmallVesselStroke | s_Peptostreptococcus_anaerobius      | MR Egger                  | 21 | 0.3915  | 0.4540 | 0.3993 | -0.0272 | 0.0539 | 0.6203 | 13.4021 | 0.8174 | 17.4011  |
| SmallVesselStroke | s_Peptostreptococcus_anaerobius      | Weighted median           | 21 | 0.1398  | 0.1632 | 0.3916 | -0.0272 | 0.0539 | 0.6203 | 13.4021 | 0.8174 | 17.4011  |
| SmallVesselStroke | s_Peptostreptococcus_anaerobius      | Inverse variance weighted | 21 | 0.1706  | 0.1172 | 0.1455 | -0.0272 | 0.0539 | 0.6203 | 13.4021 | 0.8174 | 17.4011  |
| SmallVesselStroke | s_Peptostreptococcus_anaerobius      | Simple mode               | 21 | 0.1484  | 0.2853 | 0.6087 | -0.0272 | 0.0539 | 0.6203 | 13.4021 | 0.8174 | 17.4011  |
| SmallVesselStroke | s_Peptostreptococcus_anaerobius      | Weighted mode             | 21 | 0.1538  | 0.2823 | 0.5918 | -0.0272 | 0.0539 | 0.6203 | 13.4021 | 0.8174 | 17.4011  |
| SmallVesselStroke | s_Peptostreptococcus_stomatitis      | MR Egger                  | 21 | -0.6479 | 0.5928 | 0.2881 | 0.0555  | 0.0704 | 0.4406 | 15.6143 | 0.6828 | 17.7000  |
| SmallVesselStroke | s_Peptostreptococcus_stomatitis      | Weighted median           | 21 | -0.1730 | 0.2129 | 0.4165 | 0.0555  | 0.0704 | 0.4406 | 15.6143 | 0.6828 | 17.7000  |
| SmallVesselStroke | s_Peptostreptococcus_stomatitis      | Inverse variance weighted | 21 | -0.1967 | 0.1530 | 0.1984 | 0.0555  | 0.0704 | 0.4406 | 15.6143 | 0.6828 | 17.7000  |
| SmallVesselStroke | s_Peptostreptococcus_stomatitis      | Simple mode               | 21 | -0.2832 | 0.3595 | 0.4401 | 0.0555  | 0.0704 | 0.4406 | 15.6143 | 0.6828 | 17.7000  |
| SmallVesselStroke | s_Peptostreptococcus_stomatitis      | Weighted mode             | 21 | -0.1752 | 0.3524 | 0.6246 | 0.0555  | 0.0704 | 0.4406 | 15.6143 | 0.6828 | 17.7000  |
| SmallVesselStroke | s_Phascalartobacterium_succinatutens | MR Egger                  | 21 | -1.2238 | 0.5526 | 0.0392 | 0.1354  | 0.0656 | 0.0531 | 18.1046 | 0.5805 | 1.7444   |
| SmallVesselStroke | s_Phascalartobacterium_succinatutens | Weighted median           | 21 | -0.1493 | 0.1953 | 0.4446 | 0.1354  | 0.0656 | 0.0531 | 18.1046 | 0.5805 | 1.7444   |
| SmallVesselStroke | s_Phascalartobacterium_succinatutens | Inverse variance weighted | 21 | -0.1230 | 0.1426 | 0.3885 | 0.1354  | 0.0656 | 0.0531 | 18.1046 | 0.5805 | 1.7444   |
| SmallVesselStroke | s_Phascalartobacterium_succinatutens | Simple mode               | 21 | -0.2259 | 0.3616 | 0.5392 | 0.1354  | 0.0656 | 0.0531 | 18.1046 | 0.5805 | 1.7444   |
| SmallVesselStroke | s_Phascalartobacterium_succinatutens | Weighted mode             | 21 | -0.2259 | 0.3529 | 0.5293 | 0.1354  | 0.0656 | 0.0531 | 18.1046 | 0.5805 | 1.7444   |
| SmallVesselStroke | s_Porphyromonas_asaccharolytica      | MR Egger                  | 21 | -0.2130 | 0.5253 | 0.6897 | 0.0008  | 0.0624 | 0.9897 | 22.4620 | 0.2619 | 25.0275  |
| SmallVesselStroke | s_Porphyromonas_asaccharolytica      | Weighted median           | 21 | -0.3331 | 0.1789 | 0.0626 | 0.0008  | 0.0624 | 0.9897 | 22.4620 | 0.2619 | 25.0275  |
| SmallVesselStroke | s_Porphyromonas_asaccharolytica      | Inverse variance weighted | 21 | -0.2064 | 0.1321 | 0.1183 | 0.0008  | 0.0624 | 0.9897 | 22.4620 | 0.2619 | 25.0275  |
| SmallVesselStroke | s_Porphyromonas_asaccharolytica      | Simple mode               | 21 | -0.2542 | 0.3354 | 0.4574 | 0.0008  | 0.0624 | 0.9897 | 22.4620 | 0.2619 | 25.0275  |
| SmallVesselStroke | s_Porphyromonas_asaccharolytica      | Weighted mode             | 21 | -0.3039 | 0.3077 | 0.3350 | 0.0008  | 0.0624 | 0.9897 | 22.4620 | 0.2619 | 25.0275  |
| SmallVesselStroke | s_Prevotella_bergensis               | MR Egger                  | 21 | -0.0870 | 1.0583 | 0.9354 | 0.0358  | 0.1257 | 0.7790 | 26.0399 | 0.1291 | -30.2298 |
| SmallVesselStroke | s_Prevotella_bergensis               | Weighted median           | 21 | -0.2157 | 0.3477 | 0.5351 | 0.0358  | 0.1257 | 0.7790 | 26.0399 | 0.1291 | -30.2298 |
| SmallVesselStroke | s_Prevotella_bergensis               | Inverse variance weighted | 21 | 0.2041  | 0.2668 | 0.4442 | 0.0358  | 0.1257 | 0.7790 | 26.0399 | 0.1291 | -30.2298 |
| SmallVesselStroke | s_Prevotella_bergensis               | Simple mode               | 21 | -0.4116 | 0.6504 | 0.5341 | 0.0358  | 0.1257 | 0.7790 | 26.0399 | 0.1291 | -30.2298 |
| SmallVesselStroke | s_Prevotella_bergensis               | Weighted mode             | 21 | -0.3619 | 0.5841 | 0.5425 | 0.0358  | 0.1257 | 0.7790 | 26.0399 | 0.1291 | -30.2298 |
| SmallVesselStroke | s_Prevotella_bivia                   | MR Egger                  | 21 | -0.1006 | 0.7336 | 0.8923 | 0.0092  | 0.0872 | 0.9170 | 22.5838 | 0.2562 | 5.7587   |
| SmallVesselStroke | s_Prevotella_bivia                   | Weighted median           | 21 | -0.0983 | 0.2428 | 0.6857 | 0.0092  | 0.0872 | 0.9170 | 22.5838 | 0.2562 | 5.7587   |
| SmallVesselStroke | s_Prevotella_bivia                   | Inverse variance weighted | 21 | -0.0258 | 0.1846 | 0.8888 | 0.0092  | 0.0872 | 0.9170 | 22.5838 | 0.2562 | 5.7587   |
| SmallVesselStroke | s_Prevotella_bivia                   | Simple mode               | 21 | -0.1693 | 0.4639 | 0.7190 | 0.0092  | 0.0872 | 0.9170 | 22.5838 | 0.2562 | 5.7587   |
| SmallVesselStroke | s_Prevotella_bivia                   | Weighted mode             | 21 | -0.1444 | 0.4215 | 0.7355 | 0.0092  | 0.0872 | 0.9170 | 22.5838 | 0.2562 | 5.7587   |
| SmallVesselStroke | s_Prevotella_buccae                  | MR Egger                  | 21 | -0.0021 | 0.6263 | 0.9973 | 0.0123  | 0.0744 | 0.8709 | 14.0945 | 0.7782 | 23.1770  |
| SmallVesselStroke | s_Prevotella_buccae                  | Weighted median           | 21 | 0.1244  | 0.2262 | 0.5825 | 0.0123  | 0.0744 | 0.8709 | 14.0945 | 0.7782 | 23.1770  |
| SmallVesselStroke | s_Prevotella_buccae                  | Inverse variance weighted | 21 | 0.0976  | 0.1616 | 0.5460 | 0.0123  | 0.0744 | 0.8709 | 14.0945 | 0.7782 | 23.1770  |
| SmallVesselStroke | s_Prevotella_buccae                  | Simple mode               | 21 | 0.1847  | 0.4334 | 0.6746 | 0.0123  | 0.0744 | 0.8709 | 14.0945 | 0.7782 | 23.1770  |
| SmallVesselStroke | s_Prevotella_buccae                  | Weighted mode             | 21 | 0.1318  | 0.4150 | 0.7540 | 0.0123  | 0.0744 | 0.8709 | 14.0945 | 0.7782 | 23.1770  |

|                   |                                   |                           |    |         |        |        |         |        |        |         |        |          |
|-------------------|-----------------------------------|---------------------------|----|---------|--------|--------|---------|--------|--------|---------|--------|----------|
| SmallVesselStroke | s_Prevotella_buccalis             | MR Egger                  | 21 | -0.4635 | 0.5799 | 0.4340 | 0.0400  | 0.0689 | 0.5686 | 23.9755 | 0.1971 | 24.4969  |
| SmallVesselStroke | s_Prevotella_buccalis             | Weighted median           | 21 | -0.1372 | 0.1858 | 0.4603 | 0.0400  | 0.0689 | 0.5686 | 23.9755 | 0.1971 | 24.4969  |
| SmallVesselStroke | s_Prevotella_buccalis             | Inverse variance weighted | 21 | -0.1384 | 0.1471 | 0.3467 | 0.0400  | 0.0689 | 0.5686 | 23.9755 | 0.1971 | 24.4969  |
| SmallVesselStroke | s_Prevotella_buccalis             | Simple mode               | 21 | -0.0443 | 0.3143 | 0.8893 | 0.0400  | 0.0689 | 0.5686 | 23.9755 | 0.1971 | 24.4969  |
| SmallVesselStroke | s_Prevotella_buccalis             | Weighted mode             | 21 | 0.0138  | 0.2968 | 0.9633 | 0.0400  | 0.0689 | 0.5686 | 23.9755 | 0.1971 | 24.4969  |
| SmallVesselStroke | s_Prevotella_copri                | MR Egger                  | 21 | -0.0159 | 1.4992 | 0.9916 | 0.0095  | 0.1781 | 0.9580 | 36.5385 | 0.0091 | -7.9299  |
| SmallVesselStroke | s_Prevotella_copri                | Weighted median           | 21 | -0.4476 | 0.4356 | 0.3041 | 0.0095  | 0.1781 | 0.9580 | 36.5385 | 0.0091 | -7.9299  |
| SmallVesselStroke | s_Prevotella_copri                | Inverse variance weighted | 21 | 0.0613  | 0.3772 | 0.8709 | 0.0095  | 0.1781 | 0.9580 | 36.5385 | 0.0091 | -7.9299  |
| SmallVesselStroke | s_Prevotella_copri                | Simple mode               | 21 | -0.8805 | 0.8531 | 0.3144 | 0.0095  | 0.1781 | 0.9580 | 36.5385 | 0.0091 | -7.9299  |
| SmallVesselStroke | s_Prevotella_copri                | Weighted mode             | 21 | -0.8100 | 0.6873 | 0.2525 | 0.0095  | 0.1781 | 0.9580 | 36.5385 | 0.0091 | -7.9299  |
| SmallVesselStroke | s_Prevotella_denticola            | MR Egger                  | 21 | -0.6948 | 1.2480 | 0.5842 | 0.1130  | 0.1483 | 0.4551 | 31.1936 | 0.0384 | -6.2218  |
| SmallVesselStroke | s_Prevotella_denticola            | Weighted median           | 21 | -0.0865 | 0.3722 | 0.8161 | 0.1130  | 0.1483 | 0.4551 | 31.1936 | 0.0384 | -6.2218  |
| SmallVesselStroke | s_Prevotella_denticola            | Inverse variance weighted | 21 | 0.2245  | 0.3187 | 0.4812 | 0.1130  | 0.1483 | 0.4551 | 31.1936 | 0.0384 | -6.2218  |
| SmallVesselStroke | s_Prevotella_denticola            | Simple mode               | 21 | -0.3848 | 0.6617 | 0.5674 | 0.1130  | 0.1483 | 0.4551 | 31.1936 | 0.0384 | -6.2218  |
| SmallVesselStroke | s_Prevotella_denticola            | Weighted mode             | 21 | -0.1731 | 0.6148 | 0.7812 | 0.1130  | 0.1483 | 0.4551 | 31.1936 | 0.0384 | -6.2218  |
| SmallVesselStroke | s_Prevotella_disiens              | MR Egger                  | 21 | -0.5303 | 0.3571 | 0.1539 | 0.0499  | 0.0424 | 0.2538 | 23.3227 | 0.2732 | 26.4509  |
| SmallVesselStroke | s_Prevotella_disiens              | Weighted median           | 21 | -0.0573 | 0.1254 | 0.6479 | 0.0499  | 0.0424 | 0.2538 | 23.3227 | 0.2732 | 26.4509  |
| SmallVesselStroke | s_Prevotella_disiens              | Inverse variance weighted | 21 | -0.1244 | 0.0930 | 0.1813 | 0.0499  | 0.0424 | 0.2538 | 23.3227 | 0.2732 | 26.4509  |
| SmallVesselStroke | s_Prevotella_disiens              | Simple mode               | 21 | -0.0064 | 0.2397 | 0.9790 | 0.0499  | 0.0424 | 0.2538 | 23.3227 | 0.2732 | 26.4509  |
| SmallVesselStroke | s_Prevotella_disiens              | Weighted mode             | 21 | -0.0064 | 0.2365 | 0.9787 | 0.0499  | 0.0424 | 0.2538 | 23.3227 | 0.2732 | 26.4509  |
| SmallVesselStroke | s_Prevotella_oris                 | MR Egger                  | 21 | -0.2281 | 0.3138 | 0.4761 | 0.0242  | 0.0373 | 0.5239 | 15.5483 | 0.6872 | 46.1910  |
| SmallVesselStroke | s_Prevotella_oris                 | Weighted median           | 21 | -0.0480 | 0.1105 | 0.6641 | 0.0242  | 0.0373 | 0.5239 | 15.5483 | 0.6872 | 46.1910  |
| SmallVesselStroke | s_Prevotella_oris                 | Inverse variance weighted | 21 | -0.0313 | 0.0810 | 0.6995 | 0.0242  | 0.0373 | 0.5239 | 15.5483 | 0.6872 | 46.1910  |
| SmallVesselStroke | s_Prevotella_oris                 | Simple mode               | 21 | -0.2551 | 0.2148 | 0.2489 | 0.0242  | 0.0373 | 0.5239 | 15.5483 | 0.6872 | 46.1910  |
| SmallVesselStroke | s_Prevotella_oris                 | Weighted mode             | 21 | -0.0982 | 0.2056 | 0.6382 | 0.0242  | 0.0373 | 0.5239 | 15.5483 | 0.6872 | 46.1910  |
| SmallVesselStroke | s_Prevotella_tannerae             | MR Egger                  | 21 | -0.4047 | 0.5950 | 0.5046 | 0.0581  | 0.0707 | 0.4216 | 28.4555 | 0.0750 | 3.8380   |
| SmallVesselStroke | s_Prevotella_tannerae             | Weighted median           | 21 | 0.1206  | 0.1801 | 0.5033 | 0.0581  | 0.0707 | 0.4216 | 28.4555 | 0.0750 | 3.8380   |
| SmallVesselStroke | s_Prevotella_tannerae             | Inverse variance weighted | 21 | 0.0675  | 0.1523 | 0.6576 | 0.0581  | 0.0707 | 0.4216 | 28.4555 | 0.0750 | 3.8380   |
| SmallVesselStroke | s_Prevotella_tannerae             | Simple mode               | 21 | 0.1823  | 0.3061 | 0.5582 | 0.0581  | 0.0707 | 0.4216 | 28.4555 | 0.0750 | 3.8380   |
| SmallVesselStroke | s_Prevotella_tannerae             | Weighted mode             | 21 | 0.2250  | 0.2946 | 0.4540 | 0.0581  | 0.0707 | 0.4216 | 28.4555 | 0.0750 | 3.8380   |
| SmallVesselStroke | s_Prevotella_timonensis           | MR Egger                  | 21 | -0.3521 | 0.3703 | 0.3536 | 0.0350  | 0.0440 | 0.4360 | 12.0936 | 0.8816 | 52.6768  |
| SmallVesselStroke | s_Prevotella_timonensis           | Weighted median           | 21 | -0.1188 | 0.1281 | 0.3538 | 0.0350  | 0.0440 | 0.4360 | 12.0936 | 0.8816 | 52.6768  |
| SmallVesselStroke | s_Prevotella_timonensis           | Inverse variance weighted | 21 | -0.0674 | 0.0956 | 0.4807 | 0.0350  | 0.0440 | 0.4360 | 12.0936 | 0.8816 | 52.6768  |
| SmallVesselStroke | s_Prevotella_timonensis           | Simple mode               | 21 | -0.2286 | 0.2453 | 0.3625 | 0.0350  | 0.0440 | 0.4360 | 12.0936 | 0.8816 | 52.6768  |
| SmallVesselStroke | s_Prevotella_timonensis           | Weighted mode             | 21 | -0.2205 | 0.2247 | 0.3381 | 0.0350  | 0.0440 | 0.4360 | 12.0936 | 0.8816 | 52.6768  |
| SmallVesselStroke | s_Providencia_rettgeri            | MR Egger                  | 21 | 0.0389  | 0.6147 | 0.9502 | -0.0120 | 0.0730 | 0.8710 | 22.5646 | 0.2571 | 10.5815  |
| SmallVesselStroke | s_Providencia_rettgeri            | Weighted median           | 21 | -0.0233 | 0.2090 | 0.9111 | -0.0120 | 0.0730 | 0.8710 | 22.5646 | 0.2571 | 10.5815  |
| SmallVesselStroke | s_Providencia_rettgeri            | Inverse variance weighted | 21 | -0.0589 | 0.1547 | 0.7034 | -0.0120 | 0.0730 | 0.8710 | 22.5646 | 0.2571 | 10.5815  |
| SmallVesselStroke | s_Providencia_rettgeri            | Simple mode               | 21 | 0.2110  | 0.4382 | 0.6354 | -0.0120 | 0.0730 | 0.8710 | 22.5646 | 0.2571 | 10.5815  |
| SmallVesselStroke | s_Providencia_rettgeri            | Weighted mode             | 21 | 0.0136  | 0.3918 | 0.9726 | -0.0120 | 0.0730 | 0.8710 | 22.5646 | 0.2571 | 10.5815  |
| SmallVesselStroke | s_Pseudoflavonifractor_capillosus | MR Egger                  | 21 | 0.0189  | 0.2595 | 0.9428 | -0.0121 | 0.0308 | 0.6984 | 12.7821 | 0.8495 | 122.1002 |
| SmallVesselStroke | s_Pseudoflavonifractor_capillosus | Weighted median           | 21 | -0.1207 | 0.0899 | 0.1797 | -0.0121 | 0.0308 | 0.6984 | 12.7821 | 0.8495 | 122.1002 |
| SmallVesselStroke | s_Pseudoflavonifractor_capillosus | Inverse variance weighted | 21 | -0.0798 | 0.0670 | 0.2334 | -0.0121 | 0.0308 | 0.6984 | 12.7821 | 0.8495 | 122.1002 |
| SmallVesselStroke | s_Pseudoflavonifractor_capillosus | Simple mode               | 21 | -0.1611 | 0.1706 | 0.3562 | -0.0121 | 0.0308 | 0.6984 | 12.7821 | 0.8495 | 122.1002 |
| SmallVesselStroke | s_Pseudoflavonifractor_capillosus | Weighted mode             | 21 | -0.1519 | 0.1532 | 0.3335 | -0.0121 | 0.0308 | 0.6984 | 12.7821 | 0.8495 | 122.1002 |
| SmallVesselStroke | s_Roseburia_intestinalis          | MR Egger                  | 21 | 0.0935  | 0.4520 | 0.8383 | -0.0074 | 0.0537 | 0.8915 | 11.9795 | 0.8865 | 44.9619  |
| SmallVesselStroke | s_Roseburia_intestinalis          | Weighted median           | 21 | -0.0114 | 0.1572 | 0.9423 | -0.0074 | 0.0537 | 0.8915 | 11.9795 | 0.8865 | 44.9619  |
| SmallVesselStroke | s_Roseburia_intestinalis          | Inverse variance weighted | 21 | 0.0332  | 0.1167 | 0.7760 | -0.0074 | 0.0537 | 0.8915 | 11.9795 | 0.8865 | 44.9619  |
| SmallVesselStroke | s_Roseburia_intestinalis          | Simple mode               | 21 | -0.0493 | 0.2952 | 0.8690 | -0.0074 | 0.0537 | 0.8915 | 11.9795 | 0.8865 | 44.9619  |
| SmallVesselStroke | s_Roseburia_intestinalis          | Weighted mode             | 21 | -0.0002 | 0.2907 | 0.9996 | -0.0074 | 0.0537 | 0.8915 | 11.9795 | 0.8865 | 44.9619  |
| SmallVesselStroke | s_Ruminococcus_albus              | MR Egger                  | 21 | 0.0344  | 0.6146 | 0.9559 | -0.0198 | 0.0730 | 0.7887 | 18.3523 | 0.4990 | 1.1217   |
| SmallVesselStroke | s_Ruminococcus_albus              | Weighted median           | 21 | -0.1350 | 0.2213 | 0.5420 | -0.0198 | 0.0730 | 0.7887 | 18.3523 | 0.4990 | 1.1217   |
| SmallVesselStroke | s_Ruminococcus_albus              | Inverse variance weighted | 21 | -0.1270 | 0.1586 | 0.4233 | -0.0198 | 0.0730 | 0.7887 | 18.3523 | 0.4990 | 1.1217   |
| SmallVesselStroke | s_Ruminococcus_albus              | Simple mode               | 21 | -0.3964 | 0.3859 | 0.3165 | -0.0198 | 0.0730 | 0.7887 | 18.3523 | 0.4990 | 1.1217   |
| SmallVesselStroke | s_Ruminococcus_albus              | Weighted mode             | 21 | -0.1871 | 0.3752 | 0.6236 | -0.0198 | 0.0730 | 0.7887 | 18.3523 | 0.4990 | 1.1217   |
| SmallVesselStroke | s_Ruminococcus_bromii             | MR Egger                  | 21 | 0.3979  | 0.8143 | 0.6307 | -0.0557 | 0.0967 | 0.5714 | 26.2129 | 0.1244 | 34.8099  |
| SmallVesselStroke | s_Ruminococcus_bromii             | Weighted median           | 21 | -0.4309 | 0.2628 | 0.1011 | -0.0557 | 0.0967 | 0.5714 | 26.2129 | 0.1244 | 34.8099  |
| SmallVesselStroke | s_Ruminococcus_bromii             | Inverse variance weighted | 21 | -0.0553 | 0.2067 | 0.7892 | -0.0557 | 0.0967 | 0.5714 | 26.2129 | 0.1244 | 34.8099  |
| SmallVesselStroke | s_Ruminococcus_bromii             | Simple mode               | 21 | -0.5001 | 0.4750 | 0.3050 | -0.0557 | 0.0967 | 0.5714 | 26.2129 | 0.1244 | 34.8099  |
| SmallVesselStroke | s_Ruminococcus_bromii             | Weighted mode             | 21 | -0.4672 | 0.4532 | 0.3148 | -0.0557 | 0.0967 | 0.5714 | 26.2129 | 0.1244 | 34.8099  |
| SmallVesselStroke | s_Ruminococcus_champanelensis     | MR Egger                  | 21 | 0.2601  | 0.7343 | 0.7271 | -0.0267 | 0.0872 | 0.7627 | 24.5449 | 0.1761 | 4.8073   |

|                   |                                |                           |    |         |        |        |         |        |        |         |        |          |
|-------------------|--------------------------------|---------------------------|----|---------|--------|--------|---------|--------|--------|---------|--------|----------|
| SmallVesselStroke | s_Ruminococcus_champanellensis | Weighted median           | 21 | -0.0615 | 0.2435 | 0.8007 | -0.0267 | 0.0872 | 0.7627 | 24.5449 | 0.1761 | 4.8073   |
| SmallVesselStroke | s_Ruminococcus_champanellensis | Inverse variance weighted | 21 | 0.0428  | 0.1851 | 0.8173 | -0.0267 | 0.0872 | 0.7627 | 24.5449 | 0.1761 | 4.8073   |
| SmallVesselStroke | s_Ruminococcus_champanellensis | Simple mode               | 21 | -0.0093 | 0.4631 | 0.9841 | -0.0267 | 0.0872 | 0.7627 | 24.5449 | 0.1761 | 4.8073   |
| SmallVesselStroke | s_Ruminococcus_champanellensis | Weighted mode             | 21 | 0.0473  | 0.4065 | 0.9085 | -0.0267 | 0.0872 | 0.7627 | 24.5449 | 0.1761 | 4.8073   |
| SmallVesselStroke | s_Ruminococcus_gnavus          | MR Egger                  | 21 | -0.2332 | 0.4350 | 0.5981 | 0.0155  | 0.0517 | 0.7668 | 21.3872 | 0.3158 | NA       |
| SmallVesselStroke | s_Ruminococcus_gnavus          | Weighted median           | 21 | -0.0787 | 0.1481 | 0.5950 | 0.0155  | 0.0517 | 0.7668 | 21.3872 | 0.3158 | NA       |
| SmallVesselStroke | s_Ruminococcus_gnavus          | Inverse variance weighted | 21 | -0.1068 | 0.1097 | 0.3303 | 0.0155  | 0.0517 | 0.7668 | 21.3872 | 0.3158 | NA       |
| SmallVesselStroke | s_Ruminococcus_gnavus          | Simple mode               | 21 | 0.0524  | 0.2730 | 0.8498 | 0.0155  | 0.0517 | 0.7668 | 21.3872 | 0.3158 | NA       |
| SmallVesselStroke | s_Ruminococcus_gnavus          | Weighted mode             | 21 | 0.0458  | 0.2600 | 0.8620 | 0.0155  | 0.0517 | 0.7668 | 21.3872 | 0.3158 | NA       |
| SmallVesselStroke | s_Ruminococcus_lactaris        | MR Egger                  | 21 | 0.0646  | 0.4694 | 0.8920 | -0.0170 | 0.0558 | 0.7643 | 25.9824 | 0.1307 | 2.6100   |
| SmallVesselStroke | s_Ruminococcus_lactaris        | Weighted median           | 21 | -0.0871 | 0.1467 | 0.5525 | -0.0170 | 0.0558 | 0.7643 | 25.9824 | 0.1307 | 2.6100   |
| SmallVesselStroke | s_Ruminococcus_lactaris        | Inverse variance weighted | 21 | -0.0733 | 0.1184 | 0.5356 | -0.0170 | 0.0558 | 0.7643 | 25.9824 | 0.1307 | 2.6100   |
| SmallVesselStroke | s_Ruminococcus_lactaris        | Simple mode               | 21 | -0.1649 | 0.2381 | 0.4965 | -0.0170 | 0.0558 | 0.7643 | 25.9824 | 0.1307 | 2.6100   |
| SmallVesselStroke | s_Ruminococcus_lactaris        | Weighted mode             | 21 | -0.1475 | 0.2404 | 0.5465 | -0.0170 | 0.0558 | 0.7643 | 25.9824 | 0.1307 | 2.6100   |
| SmallVesselStroke | s_Ruminococcus_obeum           | MR Egger                  | 21 | -0.0433 | 0.2661 | 0.8725 | 0.0069  | 0.0316 | 0.8304 | 25.5344 | 0.1437 | NA       |
| SmallVesselStroke | s_Ruminococcus_obeum           | Weighted median           | 21 | -0.0351 | 0.0836 | 0.6745 | 0.0069  | 0.0316 | 0.8304 | 25.5344 | 0.1437 | NA       |
| SmallVesselStroke | s_Ruminococcus_obeum           | Inverse variance weighted | 21 | 0.0126  | 0.0670 | 0.8514 | 0.0069  | 0.0316 | 0.8304 | 25.5344 | 0.1437 | NA       |
| SmallVesselStroke | s_Ruminococcus_obeum           | Simple mode               | 21 | -0.1058 | 0.1503 | 0.4896 | 0.0069  | 0.0316 | 0.8304 | 25.5344 | 0.1437 | NA       |
| SmallVesselStroke | s_Ruminococcus_obeum           | Weighted mode             | 21 | -0.0811 | 0.1506 | 0.5960 | 0.0069  | 0.0316 | 0.8304 | 25.5344 | 0.1437 | NA       |
| SmallVesselStroke | s_Ruminococcus_torques         | MR Egger                  | 21 | -0.1279 | 0.3983 | 0.7517 | 0.0193  | 0.0473 | 0.6876 | 40.3064 | 0.0030 | NA       |
| SmallVesselStroke | s_Ruminococcus_torques         | Weighted median           | 21 | 0.0046  | 0.1095 | 0.9663 | 0.0193  | 0.0473 | 0.6876 | 40.3064 | 0.0030 | NA       |
| SmallVesselStroke | s_Ruminococcus_torques         | Inverse variance weighted | 21 | 0.0293  | 0.1006 | 0.7711 | 0.0193  | 0.0473 | 0.6876 | 40.3064 | 0.0030 | NA       |
| SmallVesselStroke | s_Ruminococcus_torques         | Simple mode               | 21 | -0.0019 | 0.1856 | 0.9919 | 0.0193  | 0.0473 | 0.6876 | 40.3064 | 0.0030 | NA       |
| SmallVesselStroke | s_Ruminococcus_torques         | Weighted mode             | 21 | -0.0260 | 0.1725 | 0.8817 | 0.0193  | 0.0473 | 0.6876 | 40.3064 | 0.0030 | NA       |
| SmallVesselStroke | s_Salmonella_enterica          | MR Egger                  | 21 | 0.4694  | 0.5671 | 0.4180 | -0.0414 | 0.0674 | 0.5464 | 17.6354 | 0.5469 | 11.6328  |
| SmallVesselStroke | s_Salmonella_enterica          | Weighted median           | 21 | 0.0290  | 0.2057 | 0.8880 | -0.0414 | 0.0674 | 0.5464 | 17.6354 | 0.5469 | 11.6328  |
| SmallVesselStroke | s_Salmonella_enterica          | Inverse variance weighted | 21 | 0.1330  | 0.1463 | 0.3636 | -0.0414 | 0.0674 | 0.5464 | 17.6354 | 0.5469 | 11.6328  |
| SmallVesselStroke | s_Salmonella_enterica          | Simple mode               | 21 | -0.0995 | 0.4247 | 0.8171 | -0.0414 | 0.0674 | 0.5464 | 17.6354 | 0.5469 | 11.6328  |
| SmallVesselStroke | s_Salmonella_enterica          | Weighted mode             | 21 | -0.0835 | 0.4091 | 0.8404 | -0.0414 | 0.0674 | 0.5464 | 17.6354 | 0.5469 | 11.6328  |
| SmallVesselStroke | s_Streptococcus_anginosus      | MR Egger                  | 21 | -0.7261 | 0.4798 | 0.1467 | 0.0893  | 0.0570 | 0.1339 | 18.7108 | 0.5407 | 41.5753  |
| SmallVesselStroke | s_Streptococcus_anginosus      | Weighted median           | 21 | 0.0401  | 0.1729 | 0.8166 | 0.0893  | 0.0570 | 0.1339 | 18.7108 | 0.5407 | 41.5753  |
| SmallVesselStroke | s_Streptococcus_anginosus      | Inverse variance weighted | 21 | -0.0001 | 0.1238 | 0.9991 | 0.0893  | 0.0570 | 0.1339 | 18.7108 | 0.5407 | 41.5753  |
| SmallVesselStroke | s_Streptococcus_anginosus      | Simple mode               | 21 | 0.0919  | 0.3313 | 0.7844 | 0.0893  | 0.0570 | 0.1339 | 18.7108 | 0.5407 | 41.5753  |
| SmallVesselStroke | s_Streptococcus_anginosus      | Weighted mode             | 21 | 0.0726  | 0.2943 | 0.8076 | 0.0893  | 0.0570 | 0.1339 | 18.7108 | 0.5407 | 41.5753  |
| SmallVesselStroke | s_Streptococcus_australis      | MR Egger                  | 21 | -0.5148 | 0.5153 | 0.3303 | 0.0553  | 0.0612 | 0.3780 | 31.9066 | 0.0443 | 2.8613   |
| SmallVesselStroke | s_Streptococcus_australis      | Weighted median           | 21 | -0.0634 | 0.1593 | 0.6908 | 0.0553  | 0.0612 | 0.3780 | 31.9066 | 0.0443 | 2.8613   |
| SmallVesselStroke | s_Streptococcus_australis      | Inverse variance weighted | 21 | -0.0655 | 0.1324 | 0.6210 | 0.0553  | 0.0612 | 0.3780 | 31.9066 | 0.0443 | 2.8613   |
| SmallVesselStroke | s_Streptococcus_australis      | Simple mode               | 21 | 0.0079  | 0.2779 | 0.9777 | 0.0553  | 0.0612 | 0.3780 | 31.9066 | 0.0443 | 2.8613   |
| SmallVesselStroke | s_Streptococcus_australis      | Weighted mode             | 21 | -0.0524 | 0.2670 | 0.8463 | 0.0553  | 0.0612 | 0.3780 | 31.9066 | 0.0443 | 2.8613   |
| SmallVesselStroke | s_Streptococcus_dysgalactiae   | MR Egger                  | 21 | -0.0768 | 0.2590 | 0.7701 | 0.0270  | 0.0308 | 0.3909 | 18.9070 | 0.4628 | 98.4059  |
| SmallVesselStroke | s_Streptococcus_dysgalactiae   | Weighted median           | 21 | 0.1586  | 0.0938 | 0.0907 | 0.0270  | 0.0308 | 0.3909 | 18.9070 | 0.4628 | 98.4059  |
| SmallVesselStroke | s_Streptococcus_dysgalactiae   | Inverse variance weighted | 21 | 0.1429  | 0.0668 | 0.0325 | 0.0270  | 0.0308 | 0.3909 | 18.9070 | 0.4628 | 98.4059  |
| SmallVesselStroke | s_Streptococcus_dysgalactiae   | Simple mode               | 21 | 0.2844  | 0.1802 | 0.1302 | 0.0270  | 0.0308 | 0.3909 | 18.9070 | 0.4628 | 98.4059  |
| SmallVesselStroke | s_Streptococcus_dysgalactiae   | Weighted mode             | 21 | 0.2507  | 0.1945 | 0.2120 | 0.0270  | 0.0308 | 0.3909 | 18.9070 | 0.4628 | 98.4059  |
| SmallVesselStroke | s_Streptococcus_gallolyticus   | MR Egger                  | 21 | -0.2748 | 0.4784 | 0.5724 | 0.0288  | 0.0568 | 0.6180 | 18.8737 | 0.4650 | 5.3621   |
| SmallVesselStroke | s_Streptococcus_gallolyticus   | Weighted median           | 21 | 0.0756  | 0.1669 | 0.6508 | 0.0288  | 0.0568 | 0.6180 | 18.8737 | 0.4650 | 5.3621   |
| SmallVesselStroke | s_Streptococcus_gallolyticus   | Inverse variance weighted | 21 | -0.0405 | 0.1235 | 0.7432 | 0.0288  | 0.0568 | 0.6180 | 18.8737 | 0.4650 | 5.3621   |
| SmallVesselStroke | s_Streptococcus_gallolyticus   | Simple mode               | 21 | -0.0269 | 0.3089 | 0.9315 | 0.0288  | 0.0568 | 0.6180 | 18.8737 | 0.4650 | 5.3621   |
| SmallVesselStroke | s_Streptococcus_gallolyticus   | Weighted mode             | 21 | 0.0046  | 0.2998 | 0.9878 | 0.0288  | 0.0568 | 0.6180 | 18.8737 | 0.4650 | 5.3621   |
| SmallVesselStroke | s_Streptococcus_gordonii       | MR Egger                  | 21 | 0.0317  | 0.4237 | 0.9412 | 0.0107  | 0.0503 | 0.8335 | 20.0841 | 0.3895 | 6.9516   |
| SmallVesselStroke | s_Streptococcus_gordonii       | Weighted median           | 21 | 0.1490  | 0.1623 | 0.3585 | 0.0107  | 0.0503 | 0.8335 | 20.0841 | 0.3895 | 6.9516   |
| SmallVesselStroke | s_Streptococcus_gordonii       | Inverse variance weighted | 21 | 0.1189  | 0.1067 | 0.2654 | 0.0107  | 0.0503 | 0.8335 | 20.0841 | 0.3895 | 6.9516   |
| SmallVesselStroke | s_Streptococcus_gordonii       | Simple mode               | 21 | 0.1649  | 0.2770 | 0.5583 | 0.0107  | 0.0503 | 0.8335 | 20.0841 | 0.3895 | 6.9516   |
| SmallVesselStroke | s_Streptococcus_gordonii       | Weighted mode             | 21 | 0.1580  | 0.2646 | 0.5571 | 0.0107  | 0.0503 | 0.8335 | 20.0841 | 0.3895 | 6.9516   |
| SmallVesselStroke | s_Streptococcus_infantarius    | MR Egger                  | 21 | -0.9124 | 0.7900 | 0.2625 | 0.0945  | 0.0939 | 0.3267 | 32.0801 | 0.0425 | -45.5324 |
| SmallVesselStroke | s_Streptococcus_infantarius    | Weighted median           | 21 | -0.1573 | 0.2454 | 0.5215 | 0.0945  | 0.0939 | 0.3267 | 32.0801 | 0.0425 | -45.5324 |
| SmallVesselStroke | s_Streptococcus_infantarius    | Inverse variance weighted | 21 | -0.1440 | 0.2041 | 0.4803 | 0.0945  | 0.0939 | 0.3267 | 32.0801 | 0.0425 | -45.5324 |
| SmallVesselStroke | s_Streptococcus_infantarius    | Simple mode               | 21 | -0.0935 | 0.4429 | 0.8350 | 0.0945  | 0.0939 | 0.3267 | 32.0801 | 0.0425 | -45.5324 |
| SmallVesselStroke | s_Streptococcus_infantarius    | Weighted mode             | 21 | -0.2153 | 0.3993 | 0.5957 | 0.0945  | 0.0939 | 0.3267 | 32.0801 | 0.0425 | -45.5324 |
| SmallVesselStroke | s_Streptococcus_infantis       | MR Egger                  | 21 | 0.0136  | 0.3690 | 0.9709 | 0.0031  | 0.0438 | 0.9439 | 22.3284 | 0.2682 | 22.0906  |
| SmallVesselStroke | s_Streptococcus_infantis       | Weighted median           | 21 | -0.0664 | 0.1177 | 0.5723 | 0.0031  | 0.0438 | 0.9439 | 22.3284 | 0.2682 | 22.0906  |

|                   |                               |                           |    |         |        |        |         |        |        |         |        |         |
|-------------------|-------------------------------|---------------------------|----|---------|--------|--------|---------|--------|--------|---------|--------|---------|
| SmallVesselStroke | s_Streptococcus_infantis      | Inverse variance weighted | 21 | 0.0391  | 0.0929 | 0.6741 | 0.0031  | 0.0438 | 0.9439 | 22.3284 | 0.2682 | 22.0906 |
| SmallVesselStroke | s_Streptococcus_infantis      | Simple mode               | 21 | -0.1278 | 0.2268 | 0.5793 | 0.0031  | 0.0438 | 0.9439 | 22.3284 | 0.2682 | 22.0906 |
| SmallVesselStroke | s_Streptococcus_infantis      | Weighted mode             | 21 | -0.1278 | 0.2028 | 0.5357 | 0.0031  | 0.0438 | 0.9439 | 22.3284 | 0.2682 | 22.0906 |
| SmallVesselStroke | s_Streptococcus_mitis         | MR Egger                  | 21 | 0.1360  | 0.3767 | 0.7220 | -0.0181 | 0.0448 | 0.6905 | 22.3191 | 0.2687 | 23.7952 |
| SmallVesselStroke | s_Streptococcus_mitis         | Weighted median           | 21 | -0.0109 | 0.1321 | 0.9341 | -0.0181 | 0.0448 | 0.6905 | 22.3191 | 0.2687 | 23.7952 |
| SmallVesselStroke | s_Streptococcus_mitis         | Inverse variance weighted | 21 | -0.0111 | 0.0952 | 0.9071 | -0.0181 | 0.0448 | 0.6905 | 22.3191 | 0.2687 | 23.7952 |
| SmallVesselStroke | s_Streptococcus_mitis         | Simple mode               | 21 | 0.0075  | 0.2726 | 0.9782 | -0.0181 | 0.0448 | 0.6905 | 22.3191 | 0.2687 | 23.7952 |
| SmallVesselStroke | s_Streptococcus_mitis         | Weighted mode             | 21 | 0.0512  | 0.2335 | 0.8286 | -0.0181 | 0.0448 | 0.6905 | 22.3191 | 0.2687 | 23.7952 |
| SmallVesselStroke | s_Streptococcus_mutans        | MR Egger                  | 21 | -0.0988 | 0.4181 | 0.8157 | 0.0064  | 0.0497 | 0.8989 | 22.6983 | 0.2509 | 14.2846 |
| SmallVesselStroke | s_Streptococcus_mutans        | Weighted median           | 21 | -0.0598 | 0.1359 | 0.6602 | 0.0064  | 0.0497 | 0.8989 | 22.6983 | 0.2509 | 14.2846 |
| SmallVesselStroke | s_Streptococcus_mutans        | Inverse variance weighted | 21 | -0.0468 | 0.1052 | 0.6566 | 0.0064  | 0.0497 | 0.8989 | 22.6983 | 0.2509 | 14.2846 |
| SmallVesselStroke | s_Streptococcus_mutans        | Simple mode               | 21 | -0.0801 | 0.2896 | 0.7850 | 0.0064  | 0.0497 | 0.8989 | 22.6983 | 0.2509 | 14.2846 |
| SmallVesselStroke | s_Streptococcus_mutans        | Weighted mode             | 21 | -0.0546 | 0.2764 | 0.8454 | 0.0064  | 0.0497 | 0.8989 | 22.6983 | 0.2509 | 14.2846 |
| SmallVesselStroke | s_Streptococcus_oralis        | MR Egger                  | 21 | 0.5186  | 0.4149 | 0.2265 | -0.0617 | 0.0493 | 0.2259 | 23.0640 | 0.2857 | 10.0482 |
| SmallVesselStroke | s_Streptococcus_oralis        | Weighted median           | 21 | -0.0868 | 0.1421 | 0.5413 | -0.0617 | 0.0493 | 0.2259 | 23.0640 | 0.2857 | 10.0482 |
| SmallVesselStroke | s_Streptococcus_oralis        | Inverse variance weighted | 21 | 0.0168  | 0.1086 | 0.8768 | -0.0617 | 0.0493 | 0.2259 | 23.0640 | 0.2857 | 10.0482 |
| SmallVesselStroke | s_Streptococcus_oralis        | Simple mode               | 21 | -0.2634 | 0.2907 | 0.3757 | -0.0617 | 0.0493 | 0.2259 | 23.0640 | 0.2857 | 10.0482 |
| SmallVesselStroke | s_Streptococcus_oralis        | Weighted mode             | 21 | -0.2634 | 0.2811 | 0.3598 | -0.0617 | 0.0493 | 0.2259 | 23.0640 | 0.2857 | 10.0482 |
| SmallVesselStroke | s_Streptococcus_parasanguinis | MR Egger                  | 21 | -0.3444 | 0.4978 | 0.4974 | 0.0596  | 0.0591 | 0.3258 | 21.3575 | 0.3764 | 6.7728  |
| SmallVesselStroke | s_Streptococcus_parasanguinis | Weighted median           | 21 | 0.1863  | 0.1698 | 0.2725 | 0.0596  | 0.0591 | 0.3258 | 21.3575 | 0.3764 | 6.7728  |
| SmallVesselStroke | s_Streptococcus_parasanguinis | Inverse variance weighted | 21 | 0.1407  | 0.1285 | 0.2738 | 0.0596  | 0.0591 | 0.3258 | 21.3575 | 0.3764 | 6.7728  |
| SmallVesselStroke | s_Streptococcus_parasanguinis | Simple mode               | 21 | 0.2038  | 0.3196 | 0.5308 | 0.0596  | 0.0591 | 0.3258 | 21.3575 | 0.3764 | 6.7728  |
| SmallVesselStroke | s_Streptococcus_parasanguinis | Weighted mode             | 21 | 0.1859  | 0.2838 | 0.5200 | 0.0596  | 0.0591 | 0.3258 | 21.3575 | 0.3764 | 6.7728  |
| SmallVesselStroke | s_Streptococcus_pneumoniae    | MR Egger                  | 21 | 0.4151  | 0.4019 | 0.3147 | -0.0501 | 0.0478 | 0.3073 | 27.9569 | 0.1104 | 7.2372  |
| SmallVesselStroke | s_Streptococcus_pneumoniae    | Weighted median           | 21 | 0.0054  | 0.1267 | 0.9658 | -0.0501 | 0.0478 | 0.3073 | 27.9569 | 0.1104 | 7.2372  |
| SmallVesselStroke | s_Streptococcus_pneumoniae    | Inverse variance weighted | 21 | 0.0078  | 0.1041 | 0.9403 | -0.0501 | 0.0478 | 0.3073 | 27.9569 | 0.1104 | 7.2372  |
| SmallVesselStroke | s_Streptococcus_pneumoniae    | Simple mode               | 21 | 0.0895  | 0.2427 | 0.7160 | -0.0501 | 0.0478 | 0.3073 | 27.9569 | 0.1104 | 7.2372  |
| SmallVesselStroke | s_Streptococcus_pneumoniae    | Weighted mode             | 21 | 0.0432  | 0.2499 | 0.8644 | -0.0501 | 0.0478 | 0.3073 | 27.9569 | 0.1104 | 7.2372  |
| SmallVesselStroke | s_Streptococcus_pyogenes      | MR Egger                  | 21 | 0.4718  | 0.7003 | 0.5086 | -0.0852 | 0.0832 | 0.3189 | 21.6593 | 0.3593 | 1.9486  |
| SmallVesselStroke | s_Streptococcus_pyogenes      | Weighted median           | 21 | -0.1173 | 0.2372 | 0.6211 | -0.0852 | 0.0832 | 0.3189 | 21.6593 | 0.3593 | 1.9486  |
| SmallVesselStroke | s_Streptococcus_pyogenes      | Inverse variance weighted | 21 | -0.2207 | 0.1809 | 0.2225 | -0.0852 | 0.0832 | 0.3189 | 21.6593 | 0.3593 | 1.9486  |
| SmallVesselStroke | s_Streptococcus_pyogenes      | Simple mode               | 21 | -0.1567 | 0.3931 | 0.6943 | -0.0852 | 0.0832 | 0.3189 | 21.6593 | 0.3593 | 1.9486  |
| SmallVesselStroke | s_Streptococcus_pyogenes      | Weighted mode             | 21 | -0.1089 | 0.3945 | 0.7853 | -0.0852 | 0.0832 | 0.3189 | 21.6593 | 0.3593 | 1.9486  |
| SmallVesselStroke | s_Streptococcus_salivarius    | MR Egger                  | 21 | -0.0571 | 0.5118 | 0.9124 | 0.0238  | 0.0608 | 0.6999 | 24.1763 | 0.1895 | 2.8262  |
| SmallVesselStroke | s_Streptococcus_salivarius    | Weighted median           | 21 | 0.1023  | 0.1595 | 0.5213 | 0.0238  | 0.0608 | 0.6999 | 24.1763 | 0.1895 | 2.8262  |
| SmallVesselStroke | s_Streptococcus_salivarius    | Inverse variance weighted | 21 | 0.1364  | 0.1293 | 0.2913 | 0.0238  | 0.0608 | 0.6999 | 24.1763 | 0.1895 | 2.8262  |
| SmallVesselStroke | s_Streptococcus_salivarius    | Simple mode               | 21 | 0.0304  | 0.3117 | 0.9233 | 0.0238  | 0.0608 | 0.6999 | 24.1763 | 0.1895 | 2.8262  |
| SmallVesselStroke | s_Streptococcus_salivarius    | Weighted mode             | 21 | 0.0304  | 0.2675 | 0.9106 | 0.0238  | 0.0608 | 0.6999 | 24.1763 | 0.1895 | 2.8262  |
| SmallVesselStroke | s_Streptococcus_sanguinis     | MR Egger                  | 21 | -0.3502 | 0.4330 | 0.4287 | 0.0507  | 0.0514 | 0.3371 | 23.0782 | 0.2850 | 6.7129  |
| SmallVesselStroke | s_Streptococcus_sanguinis     | Weighted median           | 21 | 0.0099  | 0.1496 | 0.9472 | 0.0507  | 0.0514 | 0.3371 | 23.0782 | 0.2850 | 6.7129  |
| SmallVesselStroke | s_Streptococcus_sanguinis     | Inverse variance weighted | 21 | 0.0618  | 0.1117 | 0.5798 | 0.0507  | 0.0514 | 0.3371 | 23.0782 | 0.2850 | 6.7129  |
| SmallVesselStroke | s_Streptococcus_sanguinis     | Simple mode               | 21 | 0.0470  | 0.2940 | 0.8745 | 0.0507  | 0.0514 | 0.3371 | 23.0782 | 0.2850 | 6.7129  |
| SmallVesselStroke | s_Streptococcus_sanguinis     | Weighted mode             | 21 | 0.0171  | 0.2526 | 0.9467 | 0.0507  | 0.0514 | 0.3371 | 23.0782 | 0.2850 | 6.7129  |
| SmallVesselStroke | s_Streptococcus_suis          | MR Egger                  | 21 | -0.0537 | 0.5601 | 0.9246 | 0.0180  | 0.0665 | 0.7892 | 20.3566 | 0.3734 | 29.6153 |
| SmallVesselStroke | s_Streptococcus_suis          | Weighted median           | 21 | -0.0620 | 0.1918 | 0.7466 | 0.0180  | 0.0665 | 0.7892 | 20.3566 | 0.3734 | 29.6153 |
| SmallVesselStroke | s_Streptococcus_suis          | Inverse variance weighted | 21 | 0.0930  | 0.1411 | 0.5099 | 0.0180  | 0.0665 | 0.7892 | 20.3566 | 0.3734 | 29.6153 |
| SmallVesselStroke | s_Streptococcus_suis          | Simple mode               | 21 | -0.1992 | 0.3596 | 0.5857 | 0.0180  | 0.0665 | 0.7892 | 20.3566 | 0.3734 | 29.6153 |
| SmallVesselStroke | s_Streptococcus_suis          | Weighted mode             | 21 | -0.1813 | 0.3509 | 0.6111 | 0.0180  | 0.0665 | 0.7892 | 20.3566 | 0.3734 | 29.6153 |
| SmallVesselStroke | s_Streptococcus_vestibularis  | MR Egger                  | 21 | -0.1034 | 0.4764 | 0.8305 | 0.0338  | 0.0566 | 0.5569 | 21.5588 | 0.3068 | 1.1106  |
| SmallVesselStroke | s_Streptococcus_vestibularis  | Weighted median           | 21 | 0.0577  | 0.1665 | 0.7288 | 0.0338  | 0.0566 | 0.5569 | 21.5588 | 0.3068 | 1.1106  |
| SmallVesselStroke | s_Streptococcus_vestibularis  | Inverse variance weighted | 21 | 0.1718  | 0.1210 | 0.1557 | 0.0338  | 0.0566 | 0.5569 | 21.5588 | 0.3068 | 1.1106  |
| SmallVesselStroke | s_Streptococcus_vestibularis  | Simple mode               | 21 | 0.0035  | 0.2806 | 0.9901 | 0.0338  | 0.0566 | 0.5569 | 21.5588 | 0.3068 | 1.1106  |
| SmallVesselStroke | s_Streptococcus_vestibularis  | Weighted mode             | 21 | 0.0035  | 0.2480 | 0.9888 | 0.0338  | 0.0566 | 0.5569 | 21.5588 | 0.3068 | 1.1106  |
| SmallVesselStroke | s_Tannerella_forsythia        | MR Egger                  | 21 | 0.5725  | 0.6298 | 0.3747 | -0.0466 | 0.0748 | 0.5412 | 28.0261 | 0.0829 | 2.3456  |
| SmallVesselStroke | s_Tannerella_forsythia        | Weighted median           | 21 | 0.4077  | 0.1880 | 0.0301 | -0.0466 | 0.0748 | 0.5412 | 28.0261 | 0.0829 | 2.3456  |
| SmallVesselStroke | s_Tannerella_forsythia        | Inverse variance weighted | 21 | 0.1939  | 0.1601 | 0.2258 | -0.0466 | 0.0748 | 0.5412 | 28.0261 | 0.0829 | 2.3456  |
| SmallVesselStroke | s_Tannerella_forsythia        | Simple mode               | 21 | 0.4639  | 0.3536 | 0.2044 | -0.0466 | 0.0748 | 0.5412 | 28.0261 | 0.0829 | 2.3456  |
| SmallVesselStroke | s_Tannerella_forsythia        | Weighted mode             | 21 | 0.4639  | 0.3078 | 0.1474 | -0.0466 | 0.0748 | 0.5412 | 28.0261 | 0.0829 | 2.3456  |
| SmallVesselStroke | s_Treponema_denticola         | MR Egger                  | 21 | -0.4854 | 0.4151 | 0.2567 | 0.0568  | 0.0493 | 0.2640 | 30.4754 | 0.0625 | 7.1835  |
| SmallVesselStroke | s_Treponema_denticola         | Weighted median           | 21 | -0.0438 | 0.1231 | 0.7223 | 0.0568  | 0.0493 | 0.2640 | 30.4754 | 0.0625 | 7.1835  |
| SmallVesselStroke | s_Treponema_denticola         | Inverse variance weighted | 21 | -0.0238 | 0.1080 | 0.8256 | 0.0568  | 0.0493 | 0.2640 | 30.4754 | 0.0625 | 7.1835  |

|                   |                                                  |                           |    |         |        |        |         |        |        |         |        |          |
|-------------------|--------------------------------------------------|---------------------------|----|---------|--------|--------|---------|--------|--------|---------|--------|----------|
| SmallVesselStroke | s_Treponema_denticola                            | Simple mode               | 21 | -0.1384 | 0.2293 | 0.5529 | 0.0568  | 0.0493 | 0.2640 | 30.4754 | 0.0625 | 7.1835   |
| SmallVesselStroke | s_Treponema_denticola                            | Weighted mode             | 21 | -0.0656 | 0.2157 | 0.7642 | 0.0568  | 0.0493 | 0.2640 | 30.4754 | 0.0625 | 7.1835   |
| SmallVesselStroke | s_Treponema_vincentii                            | MR Egger                  | 21 | -0.1141 | 0.3092 | 0.7163 | 0.0110  | 0.0367 | 0.7685 | 13.7330 | 0.7990 | 32.3332  |
| SmallVesselStroke | s_Treponema_vincentii                            | Weighted median           | 21 | -0.0369 | 0.1094 | 0.7360 | 0.0110  | 0.0367 | 0.7685 | 13.7330 | 0.7990 | 32.3332  |
| SmallVesselStroke | s_Treponema_vincentii                            | Inverse variance weighted | 21 | -0.0249 | 0.0798 | 0.7553 | 0.0110  | 0.0367 | 0.7685 | 13.7330 | 0.7990 | 32.3332  |
| SmallVesselStroke | s_Treponema_vincentii                            | Simple mode               | 21 | -0.0856 | 0.1985 | 0.6711 | 0.0110  | 0.0367 | 0.7685 | 13.7330 | 0.7990 | 32.3332  |
| SmallVesselStroke | s_Treponema_vincentii                            | Weighted mode             | 21 | -0.0680 | 0.2017 | 0.7397 | 0.0110  | 0.0367 | 0.7685 | 13.7330 | 0.7990 | 32.3332  |
| SmallVesselStroke | s_Veillonella_atypica                            | MR Egger                  | 21 | -0.5459 | 0.6505 | 0.4117 | 0.0893  | 0.0773 | 0.2620 | 24.2899 | 0.2300 | 5.5923   |
| SmallVesselStroke | s_Veillonella_atypica                            | Weighted median           | 21 | -0.0040 | 0.2369 | 0.9864 | 0.0893  | 0.0773 | 0.2620 | 24.2899 | 0.2300 | 5.5923   |
| SmallVesselStroke | s_Veillonella_atypica                            | Inverse variance weighted | 21 | 0.1805  | 0.1693 | 0.2862 | 0.0893  | 0.0773 | 0.2620 | 24.2899 | 0.2300 | 5.5923   |
| SmallVesselStroke | s_Veillonella_atypica                            | Simple mode               | 21 | -0.3064 | 0.4531 | 0.5067 | 0.0893  | 0.0773 | 0.2620 | 24.2899 | 0.2300 | 5.5923   |
| SmallVesselStroke | s_Veillonella_atypica                            | Weighted mode             | 21 | -0.3783 | 0.4433 | 0.4036 | 0.0893  | 0.0773 | 0.2620 | 24.2899 | 0.2300 | 5.5923   |
| SmallVesselStroke | s_Veillonella_dispar                             | MR Egger                  | 21 | -1.0346 | 0.7548 | 0.1865 | 0.1380  | 0.0897 | 0.1404 | 33.8661 | 0.0270 | 3.7032   |
| SmallVesselStroke | s_Veillonella_dispar                             | Weighted median           | 21 | -0.3783 | 0.2379 | 0.9545 | 0.1380  | 0.0897 | 0.1404 | 33.8661 | 0.0270 | 3.7032   |
| SmallVesselStroke | s_Veillonella_dispar                             | Inverse variance weighted | 21 | 0.0873  | 0.2013 | 0.6644 | 0.1380  | 0.0897 | 0.1404 | 33.8661 | 0.0270 | 3.7032   |
| SmallVesselStroke | s_Veillonella_dispar                             | Simple mode               | 21 | 0.1964  | 0.5081 | 0.7032 | 0.1380  | 0.0897 | 0.1404 | 33.8661 | 0.0270 | 3.7032   |
| SmallVesselStroke | s_Veillonella_dispar                             | Weighted mode             | 21 | 0.0969  | 0.5068 | 0.8502 | 0.1380  | 0.0897 | 0.1404 | 33.8661 | 0.0270 | 3.7032   |
| SmallVesselStroke | s_Veillonella_parvula                            | MR Egger                  | 21 | -0.5854 | 0.7190 | 0.4256 | 0.0969  | 0.0854 | 0.2707 | 36.3169 | 0.0141 | 2.7520   |
| SmallVesselStroke | s_Veillonella_parvula                            | Weighted median           | 21 | 0.2842  | 0.2128 | 0.1818 | 0.0969  | 0.0854 | 0.2707 | 36.3169 | 0.0141 | 2.7520   |
| SmallVesselStroke | s_Veillonella_parvula                            | Inverse variance weighted | 21 | 0.2027  | 0.1869 | 0.2781 | 0.0969  | 0.0854 | 0.2707 | 36.3169 | 0.0141 | 2.7520   |
| SmallVesselStroke | s_Veillonella_parvula                            | Simple mode               | 21 | 0.7366  | 0.4790 | 0.1398 | 0.0969  | 0.0854 | 0.2707 | 36.3169 | 0.0141 | 2.7520   |
| SmallVesselStroke | s_Veillonella_parvula                            | Weighted mode             | 21 | 0.7247  | 0.5340 | 0.1898 | 0.0969  | 0.0854 | 0.2707 | 36.3169 | 0.0141 | 2.7520   |
| SmallVesselStroke | s_butyrate-producing_bacterium                   | MR Egger                  | 21 | -0.5797 | 0.5735 | 0.3248 | 0.0753  | 0.0681 | 0.2829 | 32.0280 | 0.0430 | 3.9116   |
| SmallVesselStroke | s_butyrate-producing_bacterium                   | Weighted median           | 21 | 0.1012  | 0.1647 | 0.5386 | 0.0753  | 0.0681 | 0.2829 | 32.0280 | 0.0430 | 3.9116   |
| SmallVesselStroke | s_butyrate-producing_bacterium                   | Inverse variance weighted | 21 | 0.0327  | 0.1489 | 0.8261 | 0.0753  | 0.0681 | 0.2829 | 32.0280 | 0.0430 | 3.9116   |
| SmallVesselStroke | s_butyrate-producing_bacterium                   | Simple mode               | 21 | 0.2592  | 0.3137 | 0.4185 | 0.0753  | 0.0681 | 0.2829 | 32.0280 | 0.0430 | 3.9116   |
| SmallVesselStroke | s_butyrate-producing_bacterium                   | Weighted mode             | 21 | 0.1442  | 0.3031 | 0.6393 | 0.0753  | 0.0681 | 0.2829 | 32.0280 | 0.0430 | 3.9116   |
| SmallVesselStroke | s_unclassified_Citrobacter_sp._30_2              | MR Egger                  | 21 | -0.2819 | 0.7045 | 0.6935 | 0.0447  | 0.0837 | 0.5994 | 20.5050 | 0.3648 | 13.3396  |
| SmallVesselStroke | s_unclassified_Citrobacter_sp._30_2              | Weighted median           | 21 | 0.0990  | 0.2484 | 0.6902 | 0.0447  | 0.0837 | 0.5994 | 20.5050 | 0.3648 | 13.3396  |
| SmallVesselStroke | s_unclassified_Citrobacter_sp._30_2              | Inverse variance weighted | 21 | 0.0817  | 0.1785 | 0.6471 | 0.0447  | 0.0837 | 0.5994 | 20.5050 | 0.3648 | 13.3396  |
| SmallVesselStroke | s_unclassified_Citrobacter_sp._30_2              | Simple mode               | 21 | 0.1517  | 0.4880 | 0.7592 | 0.0447  | 0.0837 | 0.5994 | 20.5050 | 0.3648 | 13.3396  |
| SmallVesselStroke | s_unclassified_Citrobacter_sp._30_2              | Weighted mode             | 21 | 0.2340  | 0.4601 | 0.6166 | 0.0447  | 0.0837 | 0.5994 | 20.5050 | 0.3648 | 13.3396  |
| SmallVesselStroke | s_unclassified_Clostridiales_bacterium_1_7_47FAA | MR Egger                  | 21 | 0.0570  | 0.2771 | 0.8392 | -0.0020 | 0.0329 | 0.9522 | 12.2615 | 0.8741 | 147.4524 |
| SmallVesselStroke | s_unclassified_Clostridiales_bacterium_1_7_47FAA | Weighted median           | 21 | 0.0193  | 0.0932 | 0.8355 | -0.0020 | 0.0329 | 0.9522 | 12.2615 | 0.8741 | 147.4524 |
| SmallVesselStroke | s_unclassified_Clostridiales_bacterium_1_7_47FAA | Inverse variance weighted | 21 | 0.0408  | 0.0715 | 0.5687 | -0.0020 | 0.0329 | 0.9522 | 12.2615 | 0.8741 | 147.4524 |
| SmallVesselStroke | s_unclassified_Clostridiales_bacterium_1_7_47FAA | Simple mode               | 21 | -0.1431 | 0.1858 | 0.4502 | -0.0020 | 0.0329 | 0.9522 | 12.2615 | 0.8741 | 147.4524 |
| SmallVesselStroke | s_unclassified_Clostridiales_bacterium_1_7_47FAA | Weighted mode             | 21 | -0.1036 | 0.1734 | 0.5569 | -0.0020 | 0.0329 | 0.9522 | 12.2615 | 0.8741 | 147.4524 |
| SmallVesselStroke | s_unclassified_Clostridium_sp._D5                | MR Egger                  | 21 | 0.1997  | 0.3758 | 0.6014 | -0.0286 | 0.0446 | 0.5293 | 27.3128 | 0.0976 | 57.8138  |
| SmallVesselStroke | s_unclassified_Clostridium_sp._D5                | Weighted median           | 21 | -0.0670 | 0.1186 | 0.5720 | -0.0286 | 0.0446 | 0.5293 | 27.3128 | 0.0976 | 57.8138  |
| SmallVesselStroke | s_unclassified_Clostridium_sp._D5                | Inverse variance weighted | 21 | -0.0330 | 0.0955 | 0.7298 | -0.0286 | 0.0446 | 0.5293 | 27.3128 | 0.0976 | 57.8138  |
| SmallVesselStroke | s_unclassified_Clostridium_sp._D5                | Simple mode               | 21 | -0.1520 | 0.2438 | 0.5399 | -0.0286 | 0.0446 | 0.5293 | 27.3128 | 0.0976 | 57.8138  |
| SmallVesselStroke | s_unclassified_Clostridium_sp._D5                | Weighted mode             | 21 | -0.0776 | 0.2096 | 0.7150 | -0.0286 | 0.0446 | 0.5293 | 27.3128 | 0.0976 | 57.8138  |
| SmallVesselStroke | s_unclassified_Clostridium_sp._HGF2              | MR Egger                  | 21 | -0.1073 | 0.3940 | 0.7884 | 0.0050  | 0.0468 | 0.9166 | 19.0320 | 0.4548 | 35.6271  |
| SmallVesselStroke | s_unclassified_Clostridium_sp._HGF2              | Weighted median           | 21 | -0.0926 | 0.1394 | 0.5062 | 0.0050  | 0.0468 | 0.9166 | 19.0320 | 0.4548 | 35.6271  |
| SmallVesselStroke | s_unclassified_Clostridium_sp._HGF2              | Inverse variance weighted | 21 | -0.0669 | 0.1016 | 0.5104 | 0.0050  | 0.0468 | 0.9166 | 19.0320 | 0.4548 | 35.6271  |
| SmallVesselStroke | s_unclassified_Clostridium_sp._HGF2              | Simple mode               | 21 | -0.1254 | 0.2995 | 0.6800 | 0.0050  | 0.0468 | 0.9166 | 19.0320 | 0.4548 | 35.6271  |
| SmallVesselStroke | s_unclassified_Clostridium_sp._HGF2              | Weighted mode             | 21 | 0.0178  | 0.2739 | 0.9489 | 0.0050  | 0.0468 | 0.9166 | 19.0320 | 0.4548 | 35.6271  |
| SmallVesselStroke | s_unclassified_Clostridium_sp._L2-50             | MR Egger                  | 21 | 0.3789  | 0.3757 | 0.3259 | -0.0410 | 0.0446 | 0.3694 | 18.7684 | 0.4718 | 50.1553  |
| SmallVesselStroke | s_unclassified_Clostridium_sp._L2-50             | Weighted median           | 21 | -0.0446 | 0.1444 | 0.7575 | -0.0410 | 0.0446 | 0.3694 | 18.7684 | 0.4718 | 50.1553  |
| SmallVesselStroke | s_unclassified_Clostridium_sp._L2-50             | Inverse variance weighted | 21 | 0.0451  | 0.0970 | 0.6416 | -0.0410 | 0.0446 | 0.3694 | 18.7684 | 0.4718 | 50.1553  |
| SmallVesselStroke | s_unclassified_Clostridium_sp._L2-50             | Simple mode               | 21 | -0.1615 | 0.2813 | 0.5723 | -0.0410 | 0.0446 | 0.3694 | 18.7684 | 0.4718 | 50.1553  |
| SmallVesselStroke | s_unclassified_Clostridium_sp._L2-50             | Weighted mode             | 21 | -0.2364 | 0.2832 | 0.4136 | -0.0410 | 0.0446 | 0.3694 | 18.7684 | 0.4718 | 50.1553  |
| SmallVesselStroke | s_unclassified_Clostridium_sp._SY8519            | MR Egger                  | 21 | 0.0052  | 0.4745 | 0.9914 | 0.0181  | 0.0564 | 0.7512 | 23.0504 | 0.2351 | 26.9783  |
| SmallVesselStroke | s_unclassified_Clostridium_sp._SY8519            | Weighted median           | 21 | 0.0774  | 0.1501 | 0.6061 | 0.0181  | 0.0564 | 0.7512 | 23.0504 | 0.2351 | 26.9783  |
| SmallVesselStroke | s_unclassified_Clostridium_sp._SY8519            | Inverse variance weighted | 21 | 0.1526  | 0.1197 | 0.2021 | 0.0181  | 0.0564 | 0.7512 | 23.0504 | 0.2351 | 26.9783  |
| SmallVesselStroke | s_unclassified_Clostridium_sp._SY8519            | Simple mode               | 21 | -0.1026 | 0.2852 | 0.7227 | 0.0181  | 0.0564 | 0.7512 | 23.0504 | 0.2351 | 26.9783  |
| SmallVesselStroke | s_unclassified_Clostridium_sp._SY8519            | Weighted mode             | 21 | -0.0006 | 0.2955 | 0.9983 | 0.0181  | 0.0564 | 0.7512 | 23.0504 | 0.2351 | 26.9783  |
| SmallVesselStroke | s_unclassified_Coprobacillus_sp._29_1            | MR Egger                  | 21 | 0.0777  | 0.4127 | 0.8527 | -0.0186 | 0.0490 | 0.7091 | 24.7573 | 0.1687 | 36.9602  |
| SmallVesselStroke | s_unclassified_Coprobacillus_sp._29_1            | Weighted median           | 21 | -0.0929 | 0.1352 | 0.4918 | -0.0186 | 0.0490 | 0.7091 | 24.7573 | 0.1687 | 36.9602  |
| SmallVesselStroke | s_unclassified_Coprobacillus_sp._29_1            | Inverse variance weighted | 21 | -0.0733 | 0.1042 | 0.4817 | -0.0186 | 0.0490 | 0.7091 | 24.7573 | 0.1687 | 36.9602  |
| SmallVesselStroke | s_unclassified_Coprobacillus_sp._29_1            | Simple mode               | 21 | -0.0292 | 0.2385 | 0.9037 | -0.0186 | 0.0490 | 0.7091 | 24.7573 | 0.1687 | 36.9602  |

|                   |                                                        |                           |    |         |        |        |         |        |        |         |        |           |
|-------------------|--------------------------------------------------------|---------------------------|----|---------|--------|--------|---------|--------|--------|---------|--------|-----------|
| SmallVesselStroke | s_unclassified_Coprobacillus_sp._29_1                  | Weighted mode             | 21 | -0.0491 | 0.2430 | 0.8420 | -0.0186 | 0.0490 | 0.7091 | 24.7573 | 0.1687 | 36.9602   |
| SmallVesselStroke | s_unclassified_Desulfovibrio_sp._3_1_syn3              | MR Egger                  | 21 | -0.0468 | 0.7179 | 0.9487 | 0.0072  | 0.0853 | 0.9333 | 23.5457 | 0.2142 | 8.2264    |
| SmallVesselStroke | s_unclassified_Desulfovibrio_sp._3_1_syn3              | Weighted median           | 21 | 0.0172  | 0.2383 | 0.9425 | 0.0072  | 0.0853 | 0.9333 | 23.5457 | 0.2142 | 8.2264    |
| SmallVesselStroke | s_unclassified_Desulfovibrio_sp._3_1_syn3              | Inverse variance weighted | 21 | 0.0120  | 0.1805 | 0.9469 | 0.0072  | 0.0853 | 0.9333 | 23.5457 | 0.2142 | 8.2264    |
| SmallVesselStroke | s_unclassified_Desulfovibrio_sp._3_1_syn3              | Simple mode               | 21 | -0.0372 | 0.4425 | 0.9338 | 0.0072  | 0.0853 | 0.9333 | 23.5457 | 0.2142 | 8.2264    |
| SmallVesselStroke | s_unclassified_Desulfovibrio_sp._3_1_syn3              | Weighted mode             | 21 | -0.0266 | 0.4389 | 0.9523 | 0.0072  | 0.0853 | 0.9333 | 23.5457 | 0.2142 | 8.2264    |
| SmallVesselStroke | s_unclassified_Eggerthella_sp._YY7918                  | MR Egger                  | 21 | -1.3357 | 0.6491 | 0.0536 | 0.1308  | 0.0770 | 0.1057 | 21.2129 | 0.3847 | 3552.4467 |
| SmallVesselStroke | s_unclassified_Eggerthella_sp._YY7918                  | Weighted median           | 21 | -0.0871 | 0.2335 | 0.7090 | 0.1308  | 0.0770 | 0.1057 | 21.2129 | 0.3847 | 3552.4467 |
| SmallVesselStroke | s_unclassified_Eggerthella_sp._YY7918                  | Inverse variance weighted | 21 | -0.2697 | 0.1709 | 0.1146 | 0.1308  | 0.0770 | 0.1057 | 21.2129 | 0.3847 | 3552.4467 |
| SmallVesselStroke | s_unclassified_Eggerthella_sp._YY7918                  | Simple mode               | 21 | -0.0431 | 0.3913 | 0.9135 | 0.1308  | 0.0770 | 0.1057 | 21.2129 | 0.3847 | 3552.4467 |
| SmallVesselStroke | s_unclassified_Eggerthella_sp._YY7918                  | Weighted mode             | 21 | -0.0183 | 0.3825 | 0.9624 | 0.1308  | 0.0770 | 0.1057 | 21.2129 | 0.3847 | 3552.4467 |
| SmallVesselStroke | s_unclassified_Enterobacteriaceae_bacterium_9_2_54FAA  | MR Egger                  | 21 | -0.1409 | 0.6187 | 0.8223 | 0.0266  | 0.0735 | 0.7214 | 15.3472 | 0.7003 | 22.3948   |
| SmallVesselStroke | s_unclassified_Enterobacteriaceae_bacterium_9_2_54FAA  | Weighted median           | 21 | 0.1786  | 0.2254 | 0.4282 | 0.0266  | 0.0735 | 0.7214 | 15.3472 | 0.7003 | 22.3948   |
| SmallVesselStroke | s_unclassified_Enterobacteriaceae_bacterium_9_2_54FAA  | Inverse variance weighted | 21 | 0.0754  | 0.1597 | 0.6368 | 0.0266  | 0.0735 | 0.7214 | 15.3472 | 0.7003 | 22.3948   |
| SmallVesselStroke | s_unclassified_Enterobacteriaceae_bacterium_9_2_54FAA  | Simple mode               | 21 | 0.2077  | 0.4351 | 0.6382 | 0.0266  | 0.0735 | 0.7214 | 15.3472 | 0.7003 | 22.3948   |
| SmallVesselStroke | s_unclassified_Enterobacteriaceae_bacterium_9_2_54FAA  | Weighted mode             | 21 | 0.2798  | 0.4247 | 0.5175 | 0.0266  | 0.0735 | 0.7214 | 15.3472 | 0.7003 | 22.3948   |
| SmallVesselStroke | s_unclassified_Erysipelotrichaceae_bacterium_3_1_53    | MR Egger                  | 21 | -0.1585 | 0.2181 | 0.4764 | 0.0198  | 0.0259 | 0.4548 | 17.5569 | 0.5522 | 98.0292   |
| SmallVesselStroke | s_unclassified_Erysipelotrichaceae_bacterium_3_1_53    | Weighted median           | 21 | -0.0686 | 0.0759 | 0.3660 | 0.0198  | 0.0259 | 0.4548 | 17.5569 | 0.5522 | 98.0292   |
| SmallVesselStroke | s_unclassified_Erysipelotrichaceae_bacterium_3_1_53    | Inverse variance weighted | 21 | 0.0023  | 0.0563 | 0.9668 | 0.0198  | 0.0259 | 0.4548 | 17.5569 | 0.5522 | 98.0292   |
| SmallVesselStroke | s_unclassified_Erysipelotrichaceae_bacterium_3_1_53    | Simple mode               | 21 | -0.1147 | 0.1415 | 0.4272 | 0.0198  | 0.0259 | 0.4548 | 17.5569 | 0.5522 | 98.0292   |
| SmallVesselStroke | s_unclassified_Erysipelotrichaceae_bacterium_3_1_53    | Weighted mode             | 21 | -0.1025 | 0.1298 | 0.4388 | 0.0198  | 0.0259 | 0.4548 | 17.5569 | 0.5522 | 98.0292   |
| SmallVesselStroke | s_unclassified_Erysipelotrichaceae_bacterium_5_2_54FAA | MR Egger                  | 21 | -0.1551 | 0.3157 | 0.6289 | 0.0136  | 0.0375 | 0.7213 | 26.8821 | 0.1074 | 46.3930   |
| SmallVesselStroke | s_unclassified_Erysipelotrichaceae_bacterium_5_2_54FAA | Weighted median           | 21 | -0.0613 | 0.0976 | 0.5300 | 0.0136  | 0.0375 | 0.7213 | 26.8821 | 0.1074 | 46.3930   |
| SmallVesselStroke | s_unclassified_Erysipelotrichaceae_bacterium_5_2_54FAA | Inverse variance weighted | 21 | -0.0446 | 0.0797 | 0.5753 | 0.0136  | 0.0375 | 0.7213 | 26.8821 | 0.1074 | 46.3930   |
| SmallVesselStroke | s_unclassified_Erysipelotrichaceae_bacterium_5_2_54FAA | Simple mode               | 21 | -0.0055 | 0.1776 | 0.9757 | 0.0136  | 0.0375 | 0.7213 | 26.8821 | 0.1074 | 46.3930   |
| SmallVesselStroke | s_unclassified_Erysipelotrichaceae_bacterium_5_2_54FAA | Weighted mode             | 21 | -0.0153 | 0.1660 | 0.9274 | 0.0136  | 0.0375 | 0.7213 | 26.8821 | 0.1074 | 46.3930   |
| SmallVesselStroke | s_unclassified_Lachnospiraceae_bacterium_1_4_56FAA     | MR Egger                  | 21 | 0.1026  | 0.3232 | 0.7544 | -0.0172 | 0.0384 | 0.6590 | 25.6380 | 0.1406 | 56.3299   |
| SmallVesselStroke | s_unclassified_Lachnospiraceae_bacterium_1_4_56FAA     | Weighted median           | 21 | 0.0256  | 0.1039 | 0.8055 | -0.0172 | 0.0384 | 0.6590 | 25.6380 | 0.1406 | 56.3299   |
| SmallVesselStroke | s_unclassified_Lachnospiraceae_bacterium_1_4_56FAA     | Inverse variance weighted | 21 | -0.0374 | 0.0817 | 0.6474 | -0.0172 | 0.0384 | 0.6590 | 25.6380 | 0.1406 | 56.3299   |
| SmallVesselStroke | s_unclassified_Lachnospiraceae_bacterium_1_4_56FAA     | Simple mode               | 21 | 0.1521  | 0.2282 | 0.5128 | -0.0172 | 0.0384 | 0.6590 | 25.6380 | 0.1406 | 56.3299   |
| SmallVesselStroke | s_unclassified_Lachnospiraceae_bacterium_1_4_56FAA     | Weighted mode             | 21 | 0.1616  | 0.2112 | 0.4532 | -0.0172 | 0.0384 | 0.6590 | 25.6380 | 0.1406 | 56.3299   |
| SmallVesselStroke | s_unclassified_Lachnospiraceae_bacterium_2_1_46FAA     | MR Egger                  | 21 | 0.4845  | 0.4329 | 0.2770 | -0.0593 | 0.0514 | 0.2631 | 25.3325 | 0.1890 | 33.0404   |
| SmallVesselStroke | s_unclassified_Lachnospiraceae_bacterium_2_1_46FAA     | Weighted median           | 21 | 0.0991  | 0.1450 | 0.4942 | -0.0593 | 0.0514 | 0.2631 | 25.3325 | 0.1890 | 33.0404   |
| SmallVesselStroke | s_unclassified_Lachnospiraceae_bacterium_2_1_46FAA     | Inverse variance weighted | 21 | 0.0021  | 0.1126 | 0.9848 | -0.0593 | 0.0514 | 0.2631 | 25.3325 | 0.1890 | 33.0404   |
| SmallVesselStroke | s_unclassified_Lachnospiraceae_bacterium_2_1_46FAA     | Simple mode               | 21 | 0.4136  | 0.3306 | 0.2254 | -0.0593 | 0.0514 | 0.2631 | 25.3325 | 0.1890 | 33.0404   |
| SmallVesselStroke | s_unclassified_Lachnospiraceae_bacterium_2_1_46FAA     | Weighted mode             | 21 | 0.4136  | 0.3166 | 0.2063 | -0.0593 | 0.0514 | 0.2631 | 25.3325 | 0.1890 | 33.0404   |
| SmallVesselStroke | s_unclassified_Lachnospiraceae_bacterium_3_1_57FAA_CT1 | MR Egger                  | 21 | -0.1808 | 0.3353 | 0.5960 | 0.0241  | 0.0398 | 0.5526 | 24.1036 | 0.1922 | 34.9756   |
| SmallVesselStroke | s_unclassified_Lachnospiraceae_bacterium_3_1_57FAA_CT1 | Weighted median           | 21 | -0.0490 | 0.1095 | 0.6547 | 0.0241  | 0.0398 | 0.5526 | 24.1036 | 0.1922 | 34.9756   |
| SmallVesselStroke | s_unclassified_Lachnospiraceae_bacterium_3_1_57FAA_CT1 | Inverse variance weighted | 21 | 0.0151  | 0.0852 | 0.8596 | 0.0241  | 0.0398 | 0.5526 | 24.1036 | 0.1922 | 34.9756   |
| SmallVesselStroke | s_unclassified_Lachnospiraceae_bacterium_3_1_57FAA_CT1 | Simple mode               | 21 | -0.0728 | 0.1893 | 0.7046 | 0.0241  | 0.0398 | 0.5526 | 24.1036 | 0.1922 | 34.9756   |
| SmallVesselStroke | s_unclassified_Lachnospiraceae_bacterium_3_1_57FAA_CT1 | Weighted mode             | 21 | -0.0728 | 0.1843 | 0.6970 | 0.0241  | 0.0398 | 0.5526 | 24.1036 | 0.1922 | 34.9756   |
| SmallVesselStroke | s_unclassified_Lachnospiraceae_bacterium_9_1_43BFAA    | MR Egger                  | 21 | 0.3129  | 0.3911 | 0.4336 | -0.0492 | 0.0465 | 0.3030 | 17.1799 | 0.6413 | 21.1271   |
| SmallVesselStroke | s_unclassified_Lachnospiraceae_bacterium_9_1_43BFAA    | Weighted median           | 21 | -0.0650 | 0.1458 | 0.6559 | -0.0492 | 0.0465 | 0.3030 | 17.1799 | 0.6413 | 21.1271   |
| SmallVesselStroke | s_unclassified_Lachnospiraceae_bacterium_9_1_43BFAA    | Inverse variance weighted | 21 | -0.0871 | 0.1009 | 0.3880 | -0.0492 | 0.0465 | 0.3030 | 17.1799 | 0.6413 | 21.1271   |
| SmallVesselStroke | s_unclassified_Lachnospiraceae_bacterium_9_1_43BFAA    | Simple mode               | 21 | -0.4771 | 0.2990 | 0.1263 | -0.0492 | 0.0465 | 0.3030 | 17.1799 | 0.6413 | 21.1271   |
| SmallVesselStroke | s_unclassified_Lachnospiraceae_bacterium_9_1_43BFAA    | Weighted mode             | 21 | -0.4666 | 0.2977 | 0.1328 | -0.0492 | 0.0465 | 0.3030 | 17.1799 | 0.6413 | 21.1271   |
| SmallVesselStroke | s_unclassified_Megasphaera_sp._UPII_135-E              | MR Egger                  | 21 | -0.7978 | 0.3174 | 0.0211 | 0.1034  | 0.0377 | 0.0129 | 24.6969 | 0.2133 | 54.0877   |
| SmallVesselStroke | s_unclassified_Megasphaera_sp._UPII_135-E              | Weighted median           | 21 | 0.0126  | 0.1222 | 0.9179 | 0.1034  | 0.0377 | 0.0129 | 24.6969 | 0.2133 | 54.0877   |
| SmallVesselStroke | s_unclassified_Megasphaera_sp._UPII_135-E              | Inverse variance weighted | 21 | 0.0434  | 0.0910 | 0.6334 | 0.1034  | 0.0377 | 0.0129 | 24.6969 | 0.2133 | 54.0877   |
| SmallVesselStroke | s_unclassified_Megasphaera_sp._UPII_135-E              | Simple mode               | 21 | -0.1475 | 0.2581 | 0.5741 | 0.1034  | 0.0377 | 0.0129 | 24.6969 | 0.2133 | 54.0877   |
| SmallVesselStroke | s_unclassified_Megasphaera_sp._UPII_135-E              | Weighted mode             | 21 | 0.0905  | 0.2401 | 0.7100 | 0.1034  | 0.0377 | 0.0129 | 24.6969 | 0.2133 | 54.0877   |
| SmallVesselStroke | s_unclassified_Oribacterium_sp._oral_taxon_078         | MR Egger                  | 21 | 0.1055  | 0.6388 | 0.8705 | -0.0203 | 0.0759 | 0.7919 | 15.0952 | 0.7165 | 13.6454   |
| SmallVesselStroke | s_unclassified_Oribacterium_sp._oral_taxon_078         | Weighted median           | 21 | -0.2141 | 0.2331 | 0.3584 | -0.0203 | 0.0759 | 0.7919 | 15.0952 | 0.7165 | 13.6454   |
| SmallVesselStroke | s_unclassified_Oribacterium_sp._oral_taxon_078         | Inverse variance weighted | 21 | -0.0596 | 0.1649 | 0.7175 | -0.0203 | 0.0759 | 0.7919 | 15.0952 | 0.7165 | 13.6454   |
| SmallVesselStroke | s_unclassified_Oribacterium_sp._oral_taxon_078         | Simple mode               | 21 | -0.5129 | 0.4909 | 0.3086 | -0.0203 | 0.0759 | 0.7919 | 15.0952 | 0.7165 | 13.6454   |
| SmallVesselStroke | s_unclassified_Oribacterium_sp._oral_taxon_078         | Weighted mode             | 21 | -0.5047 | 0.4298 | 0.2541 | -0.0203 | 0.0759 | 0.7919 | 15.0952 | 0.7165 | 13.6454   |
| SmallVesselStroke | s_unclassified_Oribacterium_sp._oral_taxon_108         | MR Egger                  | 21 | 0.1522  | 0.6622 | 0.8207 | -0.0422 | 0.0785 | 0.5978 | 20.2858 | 0.3776 | 1.3930    |
| SmallVesselStroke | s_unclassified_Oribacterium_sp._oral_taxon_108         | Weighted median           | 21 | -0.2701 | 0.2263 | 0.2326 | -0.0422 | 0.0785 | 0.5978 | 20.2858 | 0.3776 | 1.3930    |
| SmallVesselStroke | s_unclassified_Oribacterium_sp._oral_taxon_108         | Inverse variance weighted | 21 | -0.1913 | 0.1666 | 0.2508 | -0.0422 | 0.0785 | 0.5978 | 20.2858 | 0.3776 | 1.3930    |
| SmallVesselStroke | s_unclassified_Oribacterium_sp._oral_taxon_108         | Simple mode               | 21 | -0.3615 | 0.4449 | 0.4261 | -0.0422 | 0.0785 | 0.5978 | 20.2858 | 0.3776 | 1.3930    |
| SmallVesselStroke | s_unclassified_Oribacterium_sp._oral_taxon_108         | Weighted mode             | 21 | -0.2803 | 0.4544 | 0.5444 | -0.0422 | 0.0785 | 0.5978 | 20.2858 | 0.3776 | 1.3930    |

|                   |                                                 |                           |    |         |        |        |         |        |        |         |        |          |
|-------------------|-------------------------------------------------|---------------------------|----|---------|--------|--------|---------|--------|--------|---------|--------|----------|
| SmallVesselStroke | s_unclassified_Peptoniphilus_sp._oral_taxon_386 | MR Egger                  | 21 | -1.6649 | 0.6379 | 0.0172 | 0.1923  | 0.0757 | 0.0200 | 25.2635 | 0.1915 | 3.1025   |
| SmallVesselStroke | s_unclassified_Peptoniphilus_sp._oral_taxon_386 | Weighted median           | 21 | 0.2477  | 0.2404 | 0.3028 | 0.1923  | 0.0757 | 0.0200 | 25.2635 | 0.1915 | 3.1025   |
| SmallVesselStroke | s_unclassified_Peptoniphilus_sp._oral_taxon_386 | Inverse variance weighted | 21 | -0.0989 | 0.1844 | 0.5919 | 0.1923  | 0.0757 | 0.0200 | 25.2635 | 0.1915 | 3.1025   |
| SmallVesselStroke | s_unclassified_Peptoniphilus_sp._oral_taxon_386 | Simple mode               | 21 | 0.3851  | 0.4430 | 0.3950 | 0.1923  | 0.0757 | 0.0200 | 25.2635 | 0.1915 | 3.1025   |
| SmallVesselStroke | s_unclassified_Peptoniphilus_sp._oral_taxon_386 | Weighted mode             | 21 | 0.3660  | 0.4249 | 0.3993 | 0.1923  | 0.0757 | 0.0200 | 25.2635 | 0.1915 | 3.1025   |
| SmallVesselStroke | s_unclassified_Prevotella_sp._oral_taxon_472    | MR Egger                  | 21 | 0.1692  | 0.6380 | 0.7937 | -0.0338 | 0.0758 | 0.6608 | 15.3677 | 0.6990 | 2.4967   |
| SmallVesselStroke | s_unclassified_Prevotella_sp._oral_taxon_472    | Weighted median           | 21 | -0.1174 | 0.2196 | 0.5929 | -0.0338 | 0.0758 | 0.6608 | 15.3677 | 0.6990 | 2.4967   |
| SmallVesselStroke | s_unclassified_Prevotella_sp._oral_taxon_472    | Inverse variance weighted | 21 | -0.1057 | 0.1642 | 0.5199 | -0.0338 | 0.0758 | 0.6608 | 15.3677 | 0.6990 | 2.4967   |
| SmallVesselStroke | s_unclassified_Prevotella_sp._oral_taxon_472    | Simple mode               | 21 | -0.5357 | 0.4053 | 0.2012 | -0.0338 | 0.0758 | 0.6608 | 15.3677 | 0.6990 | 2.4967   |
| SmallVesselStroke | s_unclassified_Prevotella_sp._oral_taxon_472    | Weighted mode             | 21 | -0.4983 | 0.3942 | 0.2207 | -0.0338 | 0.0758 | 0.6608 | 15.3677 | 0.6990 | 2.4967   |
| SmallVesselStroke | s_unclassified_Ruminococcaceae_bacterium_D16    | MR Egger                  | 21 | -0.0178 | 0.3208 | 0.9564 | -0.0023 | 0.0381 | 0.9528 | 26.8981 | 0.1070 | 55.8441  |
| SmallVesselStroke | s_unclassified_Ruminococcaceae_bacterium_D16    | Weighted median           | 21 | -0.1189 | 0.1063 | 0.2632 | -0.0023 | 0.0381 | 0.9528 | 26.8981 | 0.1070 | 55.8441  |
| SmallVesselStroke | s_unclassified_Ruminococcaceae_bacterium_D16    | Inverse variance weighted | 21 | -0.0364 | 0.0807 | 0.6522 | -0.0023 | 0.0381 | 0.9528 | 26.8981 | 0.1070 | 55.8441  |
| SmallVesselStroke | s_unclassified_Ruminococcaceae_bacterium_D16    | Simple mode               | 21 | -0.2782 | 0.2102 | 0.2005 | -0.0023 | 0.0381 | 0.9528 | 26.8981 | 0.1070 | 55.8441  |
| SmallVesselStroke | s_unclassified_Ruminococcaceae_bacterium_D16    | Weighted mode             | 21 | -0.2425 | 0.1806 | 0.1943 | -0.0023 | 0.0381 | 0.9528 | 26.8981 | 0.1070 | 55.8441  |
| SmallVesselStroke | s_unclassified_Ruminococcus_sp._5_1_39BFAA      | MR Egger                  | 21 | -0.4610 | 0.3235 | 0.1704 | 0.0557  | 0.0384 | 0.1637 | 17.9271 | 0.5922 | 10.1494  |
| SmallVesselStroke | s_unclassified_Ruminococcus_sp._5_1_39BFAA      | Weighted median           | 21 | 0.0555  | 0.1128 | 0.6227 | 0.0557  | 0.0384 | 0.1637 | 17.9271 | 0.5922 | 10.1494  |
| SmallVesselStroke | s_unclassified_Ruminococcus_sp._5_1_39BFAA      | Inverse variance weighted | 21 | -0.0082 | 0.0835 | 0.9218 | 0.0557  | 0.0384 | 0.1637 | 17.9271 | 0.5922 | 10.1494  |
| SmallVesselStroke | s_unclassified_Ruminococcus_sp._5_1_39BFAA      | Simple mode               | 21 | 0.1318  | 0.2013 | 0.5203 | 0.0557  | 0.0384 | 0.1637 | 17.9271 | 0.5922 | 10.1494  |
| SmallVesselStroke | s_unclassified_Ruminococcus_sp._5_1_39BFAA      | Weighted mode             | 21 | 0.0725  | 0.1938 | 0.7122 | 0.0557  | 0.0384 | 0.1637 | 17.9271 | 0.5922 | 10.1494  |
| SmallVesselStroke | s_unclassified_Streptococcus_sp._C150           | MR Egger                  | 21 | -0.0579 | 0.4876 | 0.9068 | 0.0268  | 0.0579 | 0.6486 | 22.6132 | 0.2548 | 2.4099   |
| SmallVesselStroke | s_unclassified_Streptococcus_sp._C150           | Weighted median           | 21 | 0.0356  | 0.1712 | 0.8351 | 0.0268  | 0.0579 | 0.6486 | 22.6132 | 0.2548 | 2.4099   |
| SmallVesselStroke | s_unclassified_Streptococcus_sp._C150           | Inverse variance weighted | 21 | 0.1602  | 0.1234 | 0.1940 | 0.0268  | 0.0579 | 0.6486 | 22.6132 | 0.2548 | 2.4099   |
| SmallVesselStroke | s_unclassified_Streptococcus_sp._C150           | Simple mode               | 21 | 0.0606  | 0.2816 | 0.8318 | 0.0268  | 0.0579 | 0.6486 | 22.6132 | 0.2548 | 2.4099   |
| SmallVesselStroke | s_unclassified_Streptococcus_sp._C150           | Weighted mode             | 21 | 0.0392  | 0.2504 | 0.8772 | 0.0268  | 0.0579 | 0.6486 | 22.6132 | 0.2548 | 2.4099   |
| SmallVesselStroke | s_unclassified_Streptococcus_sp._M143           | MR Egger                  | 21 | 0.8477  | 0.7886 | 0.2958 | -0.0840 | 0.0934 | 0.3801 | 28.4678 | 0.0748 | 311.7998 |
| SmallVesselStroke | s_unclassified_Streptococcus_sp._M143           | Weighted median           | 21 | 0.2758  | 0.2362 | 0.2430 | -0.0840 | 0.0934 | 0.3801 | 28.4678 | 0.0748 | 311.7998 |
| SmallVesselStroke | s_unclassified_Streptococcus_sp._M143           | Inverse variance weighted | 21 | 0.1623  | 0.1995 | 0.4157 | -0.0840 | 0.0934 | 0.3801 | 28.4678 | 0.0748 | 311.7998 |
| SmallVesselStroke | s_unclassified_Streptococcus_sp._M143           | Simple mode               | 21 | 0.5576  | 0.4307 | 0.2103 | -0.0840 | 0.0934 | 0.3801 | 28.4678 | 0.0748 | 311.7998 |
| SmallVesselStroke | s_unclassified_Streptococcus_sp._M143           | Weighted mode             | 21 | 0.5195  | 0.4090 | 0.2186 | -0.0840 | 0.0934 | 0.3801 | 28.4678 | 0.0748 | 311.7998 |
| SmallVesselStroke | s_unclassified_Streptococcus_sp._oral_taxon_071 | MR Egger                  | 21 | 0.4031  | 0.4165 | 0.3453 | -0.0504 | 0.0495 | 0.3209 | 26.0869 | 0.1630 | 8.7092   |
| SmallVesselStroke | s_unclassified_Streptococcus_sp._oral_taxon_071 | Weighted median           | 21 | -0.0327 | 0.1324 | 0.8050 | -0.0504 | 0.0495 | 0.3209 | 26.0869 | 0.1630 | 8.7092   |
| SmallVesselStroke | s_unclassified_Streptococcus_sp._oral_taxon_071 | Inverse variance weighted | 21 | -0.0070 | 0.1077 | 0.9481 | -0.0504 | 0.0495 | 0.3209 | 26.0869 | 0.1630 | 8.7092   |
| SmallVesselStroke | s_unclassified_Streptococcus_sp._oral_taxon_071 | Simple mode               | 21 | -0.0442 | 0.2582 | 0.8657 | -0.0504 | 0.0495 | 0.3209 | 26.0869 | 0.1630 | 8.7092   |
| SmallVesselStroke | s_unclassified_Streptococcus_sp._oral_taxon_071 | Weighted mode             | 21 | -0.0641 | 0.2605 | 0.8080 | -0.0504 | 0.0495 | 0.3209 | 26.0869 | 0.1630 | 8.7092   |
| SmallVesselStroke | s_unclassified_Veillonella_sp._oral_taxon_158   | MR Egger                  | 21 | -0.9760 | 0.7109 | 0.1857 | 0.1275  | 0.0845 | 0.1477 | 39.8187 | 0.0053 | 3.5468   |
| SmallVesselStroke | s_unclassified_Veillonella_sp._oral_taxon_158   | Weighted median           | 21 | 0.3352  | 0.2155 | 0.1199 | 0.1275  | 0.0845 | 0.1477 | 39.8187 | 0.0053 | 3.5468   |
| SmallVesselStroke | s_unclassified_Veillonella_sp._oral_taxon_158   | Inverse variance weighted | 21 | 0.0605  | 0.1892 | 0.7493 | 0.1275  | 0.0845 | 0.1477 | 39.8187 | 0.0053 | 3.5468   |
| SmallVesselStroke | s_unclassified_Veillonella_sp._oral_taxon_158   | Simple mode               | 21 | 0.6088  | 0.4821 | 0.2212 | 0.1275  | 0.0845 | 0.1477 | 39.8187 | 0.0053 | 3.5468   |
| SmallVesselStroke | s_unclassified_Veillonella_sp._oral_taxon_158   | Weighted mode             | 21 | 0.5972  | 0.4739 | 0.2221 | 0.1275  | 0.0845 | 0.1477 | 39.8187 | 0.0053 | 3.5468   |
| Stroke            | MF0001                                          | MR Egger                  | 37 | -0.0271 | 0.1062 | 0.8005 | 0.0006  | 0.0063 | 0.9212 | 36.1825 | 0.4132 | 52.5259  |
| Stroke            | MF0001                                          | Weighted median           | 37 | -0.0340 | 0.0491 | 0.4894 | 0.0006  | 0.0063 | 0.9212 | 36.1825 | 0.4132 | 52.5259  |
| Stroke            | MF0001                                          | Inverse variance weighted | 37 | -0.0170 | 0.0342 | 0.6185 | 0.0006  | 0.0063 | 0.9212 | 36.1825 | 0.4132 | 52.5259  |
| Stroke            | MF0001                                          | Simple mode               | 37 | -0.0539 | 0.1021 | 0.6010 | 0.0006  | 0.0063 | 0.9212 | 36.1825 | 0.4132 | 52.5259  |
| Stroke            | MF0001                                          | Weighted mode             | 37 | -0.0285 | 0.0893 | 0.7514 | 0.0006  | 0.0063 | 0.9212 | 36.1825 | 0.4132 | 52.5259  |
| Stroke            | MF0002                                          | MR Egger                  | 37 | 0.2054  | 0.1771 | 0.2540 | -0.0117 | 0.0106 | 0.2772 | 37.2710 | 0.4104 | 16.2135  |
| Stroke            | MF0002                                          | Weighted median           | 37 | 0.0189  | 0.0848 | 0.8232 | -0.0117 | 0.0106 | 0.2772 | 37.2710 | 0.4104 | 16.2135  |
| Stroke            | MF0002                                          | Inverse variance weighted | 37 | 0.0206  | 0.0580 | 0.7223 | -0.0117 | 0.0106 | 0.2772 | 37.2710 | 0.4104 | 16.2135  |
| Stroke            | MF0002                                          | Simple mode               | 37 | 0.0755  | 0.1904 | 0.6939 | -0.0117 | 0.0106 | 0.2772 | 37.2710 | 0.4104 | 16.2135  |
| Stroke            | MF0002                                          | Weighted mode             | 37 | 0.0153  | 0.1732 | 0.9299 | -0.0117 | 0.0106 | 0.2772 | 37.2710 | 0.4104 | 16.2135  |
| Stroke            | MF0003                                          | MR Egger                  | 37 | 0.0278  | 0.1218 | 0.8206 | -0.0005 | 0.0073 | 0.9484 | 40.7860 | 0.2310 | 42.5953  |
| Stroke            | MF0003                                          | Weighted median           | 37 | 0.0099  | 0.0563 | 0.8603 | -0.0005 | 0.0073 | 0.9484 | 40.7860 | 0.2310 | 42.5953  |
| Stroke            | MF0003                                          | Inverse variance weighted | 37 | 0.0203  | 0.0392 | 0.6043 | -0.0005 | 0.0073 | 0.9484 | 40.7860 | 0.2310 | 42.5953  |
| Stroke            | MF0003                                          | Simple mode               | 37 | -0.0734 | 0.1079 | 0.5010 | -0.0005 | 0.0073 | 0.9484 | 40.7860 | 0.2310 | 42.5953  |
| Stroke            | MF0003                                          | Weighted mode             | 37 | -0.0182 | 0.0931 | 0.8461 | -0.0005 | 0.0073 | 0.9484 | 40.7860 | 0.2310 | 42.5953  |
| Stroke            | MF0004                                          | MR Egger                  | 37 | 0.0802  | 0.0900 | 0.3789 | -0.0034 | 0.0054 | 0.5305 | 36.5577 | 0.3963 | 46.5289  |
| Stroke            | MF0004                                          | Weighted median           | 37 | 0.0395  | 0.0427 | 0.3547 | -0.0034 | 0.0054 | 0.5305 | 36.5577 | 0.3963 | 46.5289  |
| Stroke            | MF0004                                          | Inverse variance weighted | 37 | 0.0263  | 0.0292 | 0.3668 | -0.0034 | 0.0054 | 0.5305 | 36.5577 | 0.3963 | 46.5289  |
| Stroke            | MF0004                                          | Simple mode               | 37 | 0.0131  | 0.0901 | 0.8855 | -0.0034 | 0.0054 | 0.5305 | 36.5577 | 0.3963 | 46.5289  |
| Stroke            | MF0004                                          | Weighted mode             | 37 | 0.0643  | 0.0659 | 0.3356 | -0.0034 | 0.0054 | 0.5305 | 36.5577 | 0.3963 | 46.5289  |
| Stroke            | MF0005                                          | MR Egger                  | 37 | 0.1628  | 0.1460 | 0.2723 | -0.0121 | 0.0087 | 0.1749 | 41.6875 | 0.2371 | 31.5105  |

|        |        |                           |    |         |        |        |         |        |        |         |        |          |
|--------|--------|---------------------------|----|---------|--------|--------|---------|--------|--------|---------|--------|----------|
| Stroke | MF0005 | Weighted median           | 37 | -0.0842 | 0.0656 | 0.1995 | -0.0121 | 0.0087 | 0.1749 | 41.6875 | 0.2371 | 31.5105  |
| Stroke | MF0005 | Inverse variance weighted | 37 | -0.0282 | 0.0483 | 0.5593 | -0.0121 | 0.0087 | 0.1749 | 41.6875 | 0.2371 | 31.5105  |
| Stroke | MF0005 | Simple mode               | 37 | -0.1463 | 0.1467 | 0.3253 | -0.0121 | 0.0087 | 0.1749 | 41.6875 | 0.2371 | 31.5105  |
| Stroke | MF0005 | Weighted mode             | 37 | -0.1289 | 0.1319 | 0.3350 | -0.0121 | 0.0087 | 0.1749 | 41.6875 | 0.2371 | 31.5105  |
| Stroke | MF0006 | MR Egger                  | 37 | -0.0312 | 0.0784 | 0.6935 | 0.0009  | 0.0047 | 0.8451 | 34.2234 | 0.5054 | 68.4483  |
| Stroke | MF0006 | Weighted median           | 37 | -0.0280 | 0.0388 | 0.4706 | 0.0009  | 0.0047 | 0.8451 | 34.2234 | 0.5054 | 68.4483  |
| Stroke | MF0006 | Inverse variance weighted | 37 | -0.0166 | 0.0256 | 0.5177 | 0.0009  | 0.0047 | 0.8451 | 34.2234 | 0.5054 | 68.4483  |
| Stroke | MF0006 | Simple mode               | 37 | -0.0499 | 0.0729 | 0.4987 | 0.0009  | 0.0047 | 0.8451 | 34.2234 | 0.5054 | 68.4483  |
| Stroke | MF0006 | Weighted mode             | 37 | -0.0547 | 0.0670 | 0.4203 | 0.0009  | 0.0047 | 0.8451 | 34.2234 | 0.5054 | 68.4483  |
| Stroke | MF0007 | MR Egger                  | 37 | 0.0661  | 0.2558 | 0.7976 | 0.0050  | 0.0153 | 0.7465 | 33.1091 | 0.5596 | 9.8690   |
| Stroke | MF0007 | Weighted median           | 37 | 0.0678  | 0.1189 | 0.5686 | 0.0050  | 0.0153 | 0.7465 | 33.1091 | 0.5596 | 9.8690   |
| Stroke | MF0007 | Inverse variance weighted | 37 | 0.1449  | 0.0836 | 0.0830 | 0.0050  | 0.0153 | 0.7465 | 33.1091 | 0.5596 | 9.8690   |
| Stroke | MF0007 | Simple mode               | 37 | 0.3352  | 0.2122 | 0.1229 | 0.0050  | 0.0153 | 0.7465 | 33.1091 | 0.5596 | 9.8690   |
| Stroke | MF0007 | Weighted mode             | 37 | 0.1196  | 0.1880 | 0.5286 | 0.0050  | 0.0153 | 0.7465 | 33.1091 | 0.5596 | 9.8690   |
| Stroke | MF0008 | MR Egger                  | 37 | 0.0143  | 0.0511 | 0.7812 | -0.0002 | 0.0030 | 0.9498 | 40.0693 | 0.2553 | 139.4806 |
| Stroke | MF0008 | Weighted median           | 37 | 0.0183  | 0.0239 | 0.4452 | -0.0002 | 0.0030 | 0.9498 | 40.0693 | 0.2553 | 139.4806 |
| Stroke | MF0008 | Inverse variance weighted | 37 | 0.0112  | 0.0164 | 0.4948 | -0.0002 | 0.0030 | 0.9498 | 40.0693 | 0.2553 | 139.4806 |
| Stroke | MF0008 | Simple mode               | 37 | 0.0193  | 0.0450 | 0.6711 | -0.0002 | 0.0030 | 0.9498 | 40.0693 | 0.2553 | 139.4806 |
| Stroke | MF0008 | Weighted mode             | 37 | 0.0207  | 0.0362 | 0.5706 | -0.0002 | 0.0030 | 0.9498 | 40.0693 | 0.2553 | 139.4806 |
| Stroke | MF0009 | MR Egger                  | 37 | 0.1639  | 0.1040 | 0.1239 | -0.0110 | 0.0062 | 0.0842 | 61.4085 | 0.0052 | 37.1756  |
| Stroke | MF0009 | Weighted median           | 37 | 0.0080  | 0.0434 | 0.8544 | -0.0110 | 0.0062 | 0.0842 | 61.4085 | 0.0052 | 37.1756  |
| Stroke | MF0009 | Inverse variance weighted | 37 | -0.0107 | 0.0350 | 0.7599 | -0.0110 | 0.0062 | 0.0842 | 61.4085 | 0.0052 | 37.1756  |
| Stroke | MF0009 | Simple mode               | 37 | -0.0062 | 0.0973 | 0.9493 | -0.0110 | 0.0062 | 0.0842 | 61.4085 | 0.0052 | 37.1756  |
| Stroke | MF0009 | Weighted mode             | 37 | 0.0103  | 0.1059 | 0.9232 | -0.0110 | 0.0062 | 0.0842 | 61.4085 | 0.0052 | 37.1756  |
| Stroke | MF0010 | MR Egger                  | 37 | 0.0339  | 0.0515 | 0.5151 | -0.0022 | 0.0031 | 0.4831 | 44.0493 | 0.1404 | 147.7065 |
| Stroke | MF0010 | Weighted median           | 37 | -0.0011 | 0.0224 | 0.9607 | -0.0022 | 0.0031 | 0.4831 | 44.0493 | 0.1404 | 147.7065 |
| Stroke | MF0010 | Inverse variance weighted | 37 | -0.0006 | 0.0167 | 0.9696 | -0.0022 | 0.0031 | 0.4831 | 44.0493 | 0.1404 | 147.7065 |
| Stroke | MF0010 | Simple mode               | 37 | -0.0438 | 0.0572 | 0.4495 | -0.0022 | 0.0031 | 0.4831 | 44.0493 | 0.1404 | 147.7065 |
| Stroke | MF0010 | Weighted mode             | 37 | -0.0514 | 0.0574 | 0.3761 | -0.0022 | 0.0031 | 0.4831 | 44.0493 | 0.1404 | 147.7065 |
| Stroke | MF0011 | MR Egger                  | 37 | 0.0842  | 0.1823 | 0.6470 | 0.0005  | 0.0109 | 0.9603 | 30.8549 | 0.6685 | 18.3984  |
| Stroke | MF0011 | Weighted median           | 37 | 0.0590  | 0.0835 | 0.4803 | 0.0005  | 0.0109 | 0.9603 | 30.8549 | 0.6685 | 18.3984  |
| Stroke | MF0011 | Inverse variance weighted | 37 | 0.0928  | 0.0596 | 0.1191 | 0.0005  | 0.0109 | 0.9603 | 30.8549 | 0.6685 | 18.3984  |
| Stroke | MF0011 | Simple mode               | 37 | 0.2463  | 0.1800 | 0.1796 | 0.0005  | 0.0109 | 0.9603 | 30.8549 | 0.6685 | 18.3984  |
| Stroke | MF0011 | Weighted mode             | 37 | -0.0035 | 0.1520 | 0.9818 | 0.0005  | 0.0109 | 0.9603 | 30.8549 | 0.6685 | 18.3984  |
| Stroke | MF0012 | MR Egger                  | 37 | -0.0239 | 0.3120 | 0.9394 | 0.0039  | 0.0186 | 0.8333 | 40.9824 | 0.2246 | 7.1048   |
| Stroke | MF0012 | Weighted median           | 37 | 0.0923  | 0.1360 | 0.4972 | 0.0039  | 0.0186 | 0.8333 | 40.9824 | 0.2246 | 7.1048   |
| Stroke | MF0012 | Inverse variance weighted | 37 | 0.0386  | 0.1006 | 0.7009 | 0.0039  | 0.0186 | 0.8333 | 40.9824 | 0.2246 | 7.1048   |
| Stroke | MF0012 | Simple mode               | 37 | -0.0428 | 0.2623 | 0.8713 | 0.0039  | 0.0186 | 0.8333 | 40.9824 | 0.2246 | 7.1048   |
| Stroke | MF0012 | Weighted mode             | 37 | 0.0018  | 0.2281 | 0.9939 | 0.0039  | 0.0186 | 0.8333 | 40.9824 | 0.2246 | 7.1048   |
| Stroke | MF0013 | MR Egger                  | 37 | 0.0203  | 0.0426 | 0.6361 | -0.0020 | 0.0025 | 0.4388 | 25.7140 | 0.8739 | 153.4307 |
| Stroke | MF0013 | Weighted median           | 37 | -0.0081 | 0.0194 | 0.6766 | -0.0020 | 0.0025 | 0.4388 | 25.7140 | 0.8739 | 153.4307 |
| Stroke | MF0013 | Inverse variance weighted | 37 | -0.0112 | 0.0139 | 0.4213 | -0.0020 | 0.0025 | 0.4388 | 25.7140 | 0.8739 | 153.4307 |
| Stroke | MF0013 | Simple mode               | 37 | -0.0077 | 0.0375 | 0.8391 | -0.0020 | 0.0025 | 0.4388 | 25.7140 | 0.8739 | 153.4307 |
| Stroke | MF0013 | Weighted mode             | 37 | -0.0020 | 0.0330 | 0.9529 | -0.0020 | 0.0025 | 0.4388 | 25.7140 | 0.8739 | 153.4307 |
| Stroke | MF0014 | MR Egger                  | 37 | -0.0672 | 0.0971 | 0.4931 | 0.0034  | 0.0058 | 0.5651 | 35.6416 | 0.4381 | 71.9506  |
| Stroke | MF0014 | Weighted median           | 37 | -0.0263 | 0.0471 | 0.5762 | 0.0034  | 0.0058 | 0.5651 | 35.6416 | 0.4381 | 71.9506  |
| Stroke | MF0014 | Inverse variance weighted | 37 | -0.0140 | 0.0314 | 0.6569 | 0.0034  | 0.0058 | 0.5651 | 35.6416 | 0.4381 | 71.9506  |
| Stroke | MF0014 | Simple mode               | 37 | -0.0344 | 0.1127 | 0.7622 | 0.0034  | 0.0058 | 0.5651 | 35.6416 | 0.4381 | 71.9506  |
| Stroke | MF0014 | Weighted mode             | 37 | -0.0545 | 0.0942 | 0.5667 | 0.0034  | 0.0058 | 0.5651 | 35.6416 | 0.4381 | 71.9506  |
| Stroke | MF0015 | MR Egger                  | 37 | 0.1097  | 0.1936 | 0.5745 | -0.0013 | 0.0116 | 0.9089 | 31.5520 | 0.6353 | 24.0138  |
| Stroke | MF0015 | Weighted median           | 37 | 0.1080  | 0.0942 | 0.2516 | -0.0013 | 0.0116 | 0.9089 | 31.5520 | 0.6353 | 24.0138  |
| Stroke | MF0015 | Inverse variance weighted | 37 | 0.0886  | 0.0633 | 0.1612 | -0.0013 | 0.0116 | 0.9089 | 31.5520 | 0.6353 | 24.0138  |
| Stroke | MF0015 | Simple mode               | 37 | 0.2038  | 0.2053 | 0.3274 | -0.0013 | 0.0116 | 0.9089 | 31.5520 | 0.6353 | 24.0138  |
| Stroke | MF0015 | Weighted mode             | 37 | 0.1682  | 0.1831 | 0.3646 | -0.0013 | 0.0116 | 0.9089 | 31.5520 | 0.6353 | 24.0138  |
| Stroke | MF0016 | MR Egger                  | 37 | -0.2794 | 0.1596 | 0.0888 | 0.0139  | 0.0095 | 0.1526 | 23.1519 | 0.9519 | 26.1932  |
| Stroke | MF0016 | Weighted median           | 37 | -0.0179 | 0.0729 | 0.8059 | 0.0139  | 0.0095 | 0.1526 | 23.1519 | 0.9519 | 26.1932  |
| Stroke | MF0016 | Inverse variance weighted | 37 | -0.0589 | 0.0522 | 0.2594 | 0.0139  | 0.0095 | 0.1526 | 23.1519 | 0.9519 | 26.1932  |
| Stroke | MF0016 | Simple mode               | 37 | -0.0084 | 0.1435 | 0.9535 | 0.0139  | 0.0095 | 0.1526 | 23.1519 | 0.9519 | 26.1932  |
| Stroke | MF0016 | Weighted mode             | 37 | -0.0048 | 0.1419 | 0.9734 | 0.0139  | 0.0095 | 0.1526 | 23.1519 | 0.9519 | 26.1932  |
| Stroke | MF0017 | MR Egger                  | 37 | 0.0216  | 0.0507 | 0.6723 | -0.0006 | 0.0030 | 0.8461 | 39.6417 | 0.2706 | 130.6814 |
| Stroke | MF0017 | Weighted median           | 37 | 0.0207  | 0.0225 | 0.3572 | -0.0006 | 0.0030 | 0.8461 | 39.6417 | 0.2706 | 130.6814 |

|        |        |                           |    |         |        |        |         |        |        |         |        |          |
|--------|--------|---------------------------|----|---------|--------|--------|---------|--------|--------|---------|--------|----------|
| Stroke | MF0017 | Inverse variance weighted | 37 | 0.0123  | 0.0163 | 0.4531 | -0.0006 | 0.0030 | 0.8461 | 39.6417 | 0.2706 | 130.6814 |
| Stroke | MF0017 | Simple mode               | 37 | -0.0143 | 0.0445 | 0.7499 | -0.0006 | 0.0030 | 0.8461 | 39.6417 | 0.2706 | 130.6814 |
| Stroke | MF0017 | Weighted mode             | 37 | 0.0029  | 0.0339 | 0.9326 | -0.0006 | 0.0030 | 0.8461 | 39.6417 | 0.2706 | 130.6814 |
| Stroke | MF0018 | MR Egger                  | 37 | -0.0463 | 0.0536 | 0.3934 | 0.0024  | 0.0032 | 0.4619 | 33.9386 | 0.5192 | 117.1787 |
| Stroke | MF0018 | Weighted median           | 37 | -0.0077 | 0.0255 | 0.7628 | 0.0024  | 0.0032 | 0.4619 | 33.9386 | 0.5192 | 117.1787 |
| Stroke | MF0018 | Inverse variance weighted | 37 | -0.0086 | 0.0175 | 0.6218 | 0.0024  | 0.0032 | 0.4619 | 33.9386 | 0.5192 | 117.1787 |
| Stroke | MF0018 | Simple mode               | 37 | -0.0074 | 0.0501 | 0.8827 | 0.0024  | 0.0032 | 0.4619 | 33.9386 | 0.5192 | 117.1787 |
| Stroke | MF0018 | Weighted mode             | 37 | -0.0089 | 0.0452 | 0.8454 | 0.0024  | 0.0032 | 0.4619 | 33.9386 | 0.5192 | 117.1787 |
| Stroke | MF0019 | MR Egger                  | 37 | -0.1958 | 0.1182 | 0.1064 | 0.0143  | 0.0070 | 0.0500 | 36.4553 | 0.4475 | 35.9529  |
| Stroke | MF0019 | Weighted median           | 37 | 0.0490  | 0.0547 | 0.3711 | 0.0143  | 0.0070 | 0.0500 | 36.4553 | 0.4475 | 35.9529  |
| Stroke | MF0019 | Inverse variance weighted | 37 | 0.0309  | 0.0389 | 0.4267 | 0.0143  | 0.0070 | 0.0500 | 36.4553 | 0.4475 | 35.9529  |
| Stroke | MF0019 | Simple mode               | 37 | 0.0299  | 0.1197 | 0.8039 | 0.0143  | 0.0070 | 0.0500 | 36.4553 | 0.4475 | 35.9529  |
| Stroke | MF0019 | Weighted mode             | 37 | 0.0204  | 0.1102 | 0.8544 | 0.0143  | 0.0070 | 0.0500 | 36.4553 | 0.4475 | 35.9529  |
| Stroke | MF0020 | MR Egger                  | 37 | -0.2467 | 0.1812 | 0.1821 | 0.0137  | 0.0108 | 0.2129 | 35.4229 | 0.4959 | 22.1964  |
| Stroke | MF0020 | Weighted median           | 37 | 0.0030  | 0.0871 | 0.9723 | 0.0137  | 0.0108 | 0.2129 | 35.4229 | 0.4959 | 22.1964  |
| Stroke | MF0020 | Inverse variance weighted | 37 | -0.0294 | 0.0592 | 0.6192 | 0.0137  | 0.0108 | 0.2129 | 35.4229 | 0.4959 | 22.1964  |
| Stroke | MF0020 | Simple mode               | 37 | 0.0442  | 0.1605 | 0.7845 | 0.0137  | 0.0108 | 0.2129 | 35.4229 | 0.4959 | 22.1964  |
| Stroke | MF0020 | Weighted mode             | 37 | 0.0442  | 0.1629 | 0.7875 | 0.0137  | 0.0108 | 0.2129 | 35.4229 | 0.4959 | 22.1964  |
| Stroke | MF0021 | MR Egger                  | 37 | -0.0826 | 0.0743 | 0.2741 | 0.0047  | 0.0044 | 0.2974 | 30.7317 | 0.7171 | 67.8547  |
| Stroke | MF0021 | Weighted median           | 37 | 0.0241  | 0.0351 | 0.4931 | 0.0047  | 0.0044 | 0.2974 | 30.7317 | 0.7171 | 67.8547  |
| Stroke | MF0021 | Inverse variance weighted | 37 | -0.0083 | 0.0243 | 0.7331 | 0.0047  | 0.0044 | 0.2974 | 30.7317 | 0.7171 | 67.8547  |
| Stroke | MF0021 | Simple mode               | 37 | 0.0743  | 0.0786 | 0.3507 | 0.0047  | 0.0044 | 0.2974 | 30.7317 | 0.7171 | 67.8547  |
| Stroke | MF0021 | Weighted mode             | 37 | 0.0836  | 0.0821 | 0.3157 | 0.0047  | 0.0044 | 0.2974 | 30.7317 | 0.7171 | 67.8547  |
| Stroke | MF0022 | MR Egger                  | 37 | 0.0137  | 0.0732 | 0.8525 | -0.0010 | 0.0044 | 0.8130 | 38.3739 | 0.3191 | 84.5639  |
| Stroke | MF0022 | Weighted median           | 37 | 0.0054  | 0.0323 | 0.8683 | -0.0010 | 0.0044 | 0.8130 | 38.3739 | 0.3191 | 84.5639  |
| Stroke | MF0022 | Inverse variance weighted | 37 | -0.0028 | 0.0236 | 0.9064 | -0.0010 | 0.0044 | 0.8130 | 38.3739 | 0.3191 | 84.5639  |
| Stroke | MF0022 | Simple mode               | 37 | -0.0149 | 0.0611 | 0.8092 | -0.0010 | 0.0044 | 0.8130 | 38.3739 | 0.3191 | 84.5639  |
| Stroke | MF0022 | Weighted mode             | 37 | -0.0016 | 0.0552 | 0.9777 | -0.0010 | 0.0044 | 0.8130 | 38.3739 | 0.3191 | 84.5639  |
| Stroke | MF0024 | MR Egger                  | 37 | 0.1352  | 0.6182 | 0.8282 | -0.0142 | 0.0369 | 0.7019 | 27.4406 | 0.8151 | 1.1290   |
| Stroke | MF0024 | Weighted median           | 37 | -0.0710 | 0.3002 | 0.8131 | -0.0142 | 0.0369 | 0.7019 | 27.4406 | 0.8151 | 1.1290   |
| Stroke | MF0024 | Inverse variance weighted | 37 | -0.0903 | 0.2020 | 0.6550 | -0.0142 | 0.0369 | 0.7019 | 27.4406 | 0.8151 | 1.1290   |
| Stroke | MF0024 | Simple mode               | 37 | -0.0359 | 0.5673 | 0.9498 | -0.0142 | 0.0369 | 0.7019 | 27.4406 | 0.8151 | 1.1290   |
| Stroke | MF0024 | Weighted mode             | 37 | -0.0359 | 0.4937 | 0.9424 | -0.0142 | 0.0369 | 0.7019 | 27.4406 | 0.8151 | 1.1290   |
| Stroke | MF0025 | MR Egger                  | 37 | 0.0055  | 0.2982 | 0.9854 | 0.0024  | 0.0178 | 0.8927 | 29.1103 | 0.7476 | 9.6176   |
| Stroke | MF0025 | Weighted median           | 37 | -0.0467 | 0.1412 | 0.7411 | 0.0024  | 0.0178 | 0.8927 | 29.1103 | 0.7476 | 9.6176   |
| Stroke | MF0025 | Inverse variance weighted | 37 | 0.0438  | 0.0974 | 0.6529 | 0.0024  | 0.0178 | 0.8927 | 29.1103 | 0.7476 | 9.6176   |
| Stroke | MF0025 | Simple mode               | 37 | -0.3228 | 0.3150 | 0.3123 | 0.0024  | 0.0178 | 0.8927 | 29.1103 | 0.7476 | 9.6176   |
| Stroke | MF0025 | Weighted mode             | 37 | -0.1328 | 0.2475 | 0.5950 | 0.0024  | 0.0178 | 0.8927 | 29.1103 | 0.7476 | 9.6176   |
| Stroke | MF0026 | MR Egger                  | 37 | 0.0259  | 0.0593 | 0.6648 | -0.0024 | 0.0035 | 0.5040 | 44.6369 | 0.1275 | 90.4868  |
| Stroke | MF0026 | Weighted median           | 37 | 0.0079  | 0.0265 | 0.7648 | -0.0024 | 0.0035 | 0.5040 | 44.6369 | 0.1275 | 90.4868  |
| Stroke | MF0026 | Inverse variance weighted | 37 | -0.0119 | 0.0192 | 0.5353 | -0.0024 | 0.0035 | 0.5040 | 44.6369 | 0.1275 | 90.4868  |
| Stroke | MF0026 | Simple mode               | 37 | -0.0330 | 0.0590 | 0.5793 | -0.0024 | 0.0035 | 0.5040 | 44.6369 | 0.1275 | 90.4868  |
| Stroke | MF0026 | Weighted mode             | 37 | 0.0130  | 0.0475 | 0.7862 | -0.0024 | 0.0035 | 0.5040 | 44.6369 | 0.1275 | 90.4868  |
| Stroke | MF0027 | MR Egger                  | 37 | 0.1374  | 0.3850 | 0.7233 | -0.0183 | 0.0230 | 0.4301 | 27.9786 | 0.7944 | 1.2699   |
| Stroke | MF0027 | Weighted median           | 37 | -0.2071 | 0.1750 | 0.2365 | -0.0183 | 0.0230 | 0.4301 | 27.9786 | 0.7944 | 1.2699   |
| Stroke | MF0027 | Inverse variance weighted | 37 | -0.1530 | 0.1258 | 0.2240 | -0.0183 | 0.0230 | 0.4301 | 27.9786 | 0.7944 | 1.2699   |
| Stroke | MF0027 | Simple mode               | 37 | -0.3276 | 0.3389 | 0.3401 | -0.0183 | 0.0230 | 0.4301 | 27.9786 | 0.7944 | 1.2699   |
| Stroke | MF0027 | Weighted mode             | 37 | -0.3166 | 0.3166 | 0.3239 | -0.0183 | 0.0230 | 0.4301 | 27.9786 | 0.7944 | 1.2699   |
| Stroke | MF0028 | MR Egger                  | 37 | -0.0037 | 0.0795 | 0.9630 | -0.0010 | 0.0047 | 0.8389 | 33.0870 | 0.5607 | 52.8473  |
| Stroke | MF0028 | Weighted median           | 37 | -0.0028 | 0.0378 | 0.9408 | -0.0010 | 0.0047 | 0.8389 | 33.0870 | 0.5607 | 52.8473  |
| Stroke | MF0028 | Inverse variance weighted | 37 | -0.0191 | 0.0260 | 0.4622 | -0.0010 | 0.0047 | 0.8389 | 33.0870 | 0.5607 | 52.8473  |
| Stroke | MF0028 | Simple mode               | 37 | -0.0246 | 0.0764 | 0.7495 | -0.0010 | 0.0047 | 0.8389 | 33.0870 | 0.5607 | 52.8473  |
| Stroke | MF0028 | Weighted mode             | 37 | 0.0043  | 0.0743 | 0.9540 | -0.0010 | 0.0047 | 0.8389 | 33.0870 | 0.5607 | 52.8473  |
| Stroke | MF0029 | MR Egger                  | 37 | -0.0361 | 0.1456 | 0.8055 | -0.0003 | 0.0087 | 0.9767 | 36.6769 | 0.3910 | 19.7816  |
| Stroke | MF0029 | Weighted median           | 37 | -0.0014 | 0.0713 | 0.9843 | -0.0003 | 0.0087 | 0.9767 | 36.6769 | 0.3910 | 19.7816  |
| Stroke | MF0029 | Inverse variance weighted | 37 | -0.0402 | 0.0469 | 0.3918 | -0.0003 | 0.0087 | 0.9767 | 36.6769 | 0.3910 | 19.7816  |
| Stroke | MF0029 | Simple mode               | 37 | 0.0366  | 0.1395 | 0.7945 | -0.0003 | 0.0087 | 0.9767 | 36.6769 | 0.3910 | 19.7816  |
| Stroke | MF0029 | Weighted mode             | 37 | 0.0271  | 0.1160 | 0.8168 | -0.0003 | 0.0087 | 0.9767 | 36.6769 | 0.3910 | 19.7816  |
| Stroke | MF0030 | MR Egger                  | 37 | 0.1869  | 0.2253 | 0.4124 | -0.0119 | 0.0134 | 0.3828 | 16.7089 | 0.9975 | 24.3019  |
| Stroke | MF0030 | Weighted median           | 37 | -0.0141 | 0.0968 | 0.8841 | -0.0119 | 0.0134 | 0.3828 | 16.7089 | 0.9975 | 24.3019  |
| Stroke | MF0030 | Inverse variance weighted | 37 | -0.0013 | 0.0736 | 0.9863 | -0.0119 | 0.0134 | 0.3828 | 16.7089 | 0.9975 | 24.3019  |

|        |        |                           |    |         |        |        |         |        |        |         |        |          |
|--------|--------|---------------------------|----|---------|--------|--------|---------|--------|--------|---------|--------|----------|
| Stroke | MF0030 | Simple mode               | 37 | -0.0276 | 0.1911 | 0.8858 | -0.0119 | 0.0134 | 0.3828 | 16.7089 | 0.9975 | 24.3019  |
| Stroke | MF0030 | Weighted mode             | 37 | -0.0055 | 0.1777 | 0.9755 | -0.0119 | 0.0134 | 0.3828 | 16.7089 | 0.9975 | 24.3019  |
| Stroke | MF0031 | MR Egger                  | 37 | -0.0546 | 0.3177 | 0.8645 | 0.0048  | 0.0190 | 0.8014 | 35.3446 | 0.4519 | 4.5147   |
| Stroke | MF0031 | Weighted median           | 37 | 0.1030  | 0.1497 | 0.4912 | 0.0048  | 0.0190 | 0.8014 | 35.3446 | 0.4519 | 4.5147   |
| Stroke | MF0031 | Inverse variance weighted | 37 | 0.0215  | 0.1033 | 0.8353 | 0.0048  | 0.0190 | 0.8014 | 35.3446 | 0.4519 | 4.5147   |
| Stroke | MF0031 | Simple mode               | 37 | 0.0960  | 0.3040 | 0.7539 | 0.0048  | 0.0190 | 0.8014 | 35.3446 | 0.4519 | 4.5147   |
| Stroke | MF0031 | Weighted mode             | 37 | 0.0960  | 0.2762 | 0.7301 | 0.0048  | 0.0190 | 0.8014 | 35.3446 | 0.4519 | 4.5147   |
| Stroke | MF0032 | MR Egger                  | 37 | -0.3978 | 0.5334 | 0.4607 | 0.0240  | 0.0318 | 0.4551 | 24.0113 | 0.9194 | 2.1816   |
| Stroke | MF0032 | Weighted median           | 37 | -0.1195 | 0.2619 | 0.6481 | 0.0240  | 0.0318 | 0.4551 | 24.0113 | 0.9194 | 2.1816   |
| Stroke | MF0032 | Inverse variance weighted | 37 | -0.0171 | 0.1743 | 0.9220 | 0.0240  | 0.0318 | 0.4551 | 24.0113 | 0.9194 | 2.1816   |
| Stroke | MF0032 | Simple mode               | 37 | -0.2153 | 0.5172 | 0.6797 | 0.0240  | 0.0318 | 0.4551 | 24.0113 | 0.9194 | 2.1816   |
| Stroke | MF0032 | Weighted mode             | 37 | -0.1591 | 0.4470 | 0.7239 | 0.0240  | 0.0318 | 0.4551 | 24.0113 | 0.9194 | 2.1816   |
| Stroke | MF0033 | MR Egger                  | 37 | -0.0469 | 0.0581 | 0.4249 | 0.0033  | 0.0035 | 0.3451 | 49.4535 | 0.0670 | 122.8983 |
| Stroke | MF0033 | Weighted median           | 37 | 0.0049  | 0.0250 | 0.8450 | 0.0033  | 0.0035 | 0.3451 | 49.4535 | 0.0670 | 122.8983 |
| Stroke | MF0033 | Inverse variance weighted | 37 | 0.0056  | 0.0190 | 0.7660 | 0.0033  | 0.0035 | 0.3451 | 49.4535 | 0.0670 | 122.8983 |
| Stroke | MF0033 | Simple mode               | 37 | 0.0610  | 0.0626 | 0.3361 | 0.0033  | 0.0035 | 0.3451 | 49.4535 | 0.0670 | 122.8983 |
| Stroke | MF0033 | Weighted mode             | 37 | -0.0617 | 0.0513 | 0.2371 | 0.0033  | 0.0035 | 0.3451 | 49.4535 | 0.0670 | 122.8983 |
| Stroke | MF0034 | MR Egger                  | 37 | 0.0323  | 0.1501 | 0.8310 | -0.0039 | 0.0090 | 0.6698 | 34.2904 | 0.5022 | 22.1473  |
| Stroke | MF0034 | Weighted median           | 37 | 0.0396  | 0.0720 | 0.5826 | -0.0039 | 0.0090 | 0.6698 | 34.2904 | 0.5022 | 22.1473  |
| Stroke | MF0034 | Inverse variance weighted | 37 | -0.0287 | 0.0490 | 0.5579 | -0.0039 | 0.0090 | 0.6698 | 34.2904 | 0.5022 | 22.1473  |
| Stroke | MF0034 | Simple mode               | 37 | 0.0962  | 0.1597 | 0.5504 | -0.0039 | 0.0090 | 0.6698 | 34.2904 | 0.5022 | 22.1473  |
| Stroke | MF0034 | Weighted mode             | 37 | 0.0888  | 0.1264 | 0.4871 | -0.0039 | 0.0090 | 0.6698 | 34.2904 | 0.5022 | 22.1473  |
| Stroke | MF0035 | MR Egger                  | 37 | -0.2077 | 0.2011 | 0.3087 | 0.0128  | 0.0120 | 0.2927 | 35.1888 | 0.5070 | 22.6350  |
| Stroke | MF0035 | Weighted median           | 37 | 0.0151  | 0.0943 | 0.8727 | 0.0128  | 0.0120 | 0.2927 | 35.1888 | 0.5070 | 22.6350  |
| Stroke | MF0035 | Inverse variance weighted | 37 | -0.0047 | 0.0657 | 0.9435 | 0.0128  | 0.0120 | 0.2927 | 35.1888 | 0.5070 | 22.6350  |
| Stroke | MF0035 | Simple mode               | 37 | -0.0756 | 0.1983 | 0.7050 | 0.0128  | 0.0120 | 0.2927 | 35.1888 | 0.5070 | 22.6350  |
| Stroke | MF0035 | Weighted mode             | 37 | -0.0512 | 0.1871 | 0.7859 | 0.0128  | 0.0120 | 0.2927 | 35.1888 | 0.5070 | 22.6350  |
| Stroke | MF0036 | MR Egger                  | 37 | 0.0360  | 0.1409 | 0.8000 | 0.0009  | 0.0084 | 0.9192 | 30.8001 | 0.6711 | 42.9914  |
| Stroke | MF0036 | Weighted median           | 37 | 0.0494  | 0.0618 | 0.4235 | 0.0009  | 0.0084 | 0.9192 | 30.8001 | 0.6711 | 42.9914  |
| Stroke | MF0036 | Inverse variance weighted | 37 | 0.0496  | 0.0461 | 0.2816 | 0.0009  | 0.0084 | 0.9192 | 30.8001 | 0.6711 | 42.9914  |
| Stroke | MF0036 | Simple mode               | 37 | 0.0296  | 0.1303 | 0.8213 | 0.0009  | 0.0084 | 0.9192 | 30.8001 | 0.6711 | 42.9914  |
| Stroke | MF0036 | Weighted mode             | 37 | 0.0074  | 0.1195 | 0.9510 | 0.0009  | 0.0084 | 0.9192 | 30.8001 | 0.6711 | 42.9914  |
| Stroke | MF0037 | MR Egger                  | 37 | -0.3910 | 0.2446 | 0.1189 | 0.0218  | 0.0146 | 0.1440 | 31.8530 | 0.6662 | 14.8678  |
| Stroke | MF0037 | Weighted median           | 37 | -0.0881 | 0.1148 | 0.4426 | 0.0218  | 0.0146 | 0.1440 | 31.8530 | 0.6662 | 14.8678  |
| Stroke | MF0037 | Inverse variance weighted | 37 | -0.0455 | 0.0799 | 0.5693 | 0.0218  | 0.0146 | 0.1440 | 31.8530 | 0.6662 | 14.8678  |
| Stroke | MF0037 | Simple mode               | 37 | -0.1278 | 0.2201 | 0.5650 | 0.0218  | 0.0146 | 0.1440 | 31.8530 | 0.6662 | 14.8678  |
| Stroke | MF0037 | Weighted mode             | 37 | -0.0472 | 0.2132 | 0.8259 | 0.0218  | 0.0146 | 0.1440 | 31.8530 | 0.6662 | 14.8678  |
| Stroke | MF0038 | MR Egger                  | 37 | -0.0509 | 0.0665 | 0.4494 | 0.0031  | 0.0040 | 0.4379 | 21.3158 | 0.9666 | 147.5199 |
| Stroke | MF0038 | Weighted median           | 37 | -0.0042 | 0.0302 | 0.8884 | 0.0031  | 0.0040 | 0.4379 | 21.3158 | 0.9666 | 147.5199 |
| Stroke | MF0038 | Inverse variance weighted | 37 | -0.0016 | 0.0217 | 0.9431 | 0.0031  | 0.0040 | 0.4379 | 21.3158 | 0.9666 | 147.5199 |
| Stroke | MF0038 | Simple mode               | 37 | -0.0220 | 0.0584 | 0.7079 | 0.0031  | 0.0040 | 0.4379 | 21.3158 | 0.9666 | 147.5199 |
| Stroke | MF0038 | Weighted mode             | 37 | -0.0205 | 0.0540 | 0.7061 | 0.0031  | 0.0040 | 0.4379 | 21.3158 | 0.9666 | 147.5199 |
| Stroke | MF0039 | MR Egger                  | 37 | 0.1126  | 0.3294 | 0.7347 | -0.0084 | 0.0197 | 0.6728 | 35.2169 | 0.4579 | 7.5809   |
| Stroke | MF0039 | Weighted median           | 37 | 0.0194  | 0.1541 | 0.8996 | -0.0084 | 0.0197 | 0.6728 | 35.2169 | 0.4579 | 7.5809   |
| Stroke | MF0039 | Inverse variance weighted | 37 | -0.0200 | 0.1073 | 0.8518 | -0.0084 | 0.0197 | 0.6728 | 35.2169 | 0.4579 | 7.5809   |
| Stroke | MF0039 | Simple mode               | 37 | -0.0080 | 0.3087 | 0.9794 | -0.0084 | 0.0197 | 0.6728 | 35.2169 | 0.4579 | 7.5809   |
| Stroke | MF0039 | Weighted mode             | 37 | -0.0080 | 0.2871 | 0.9778 | -0.0084 | 0.0197 | 0.6728 | 35.2169 | 0.4579 | 7.5809   |
| Stroke | MF0040 | MR Egger                  | 37 | -0.1608 | 0.3606 | 0.6583 | 0.0095  | 0.0215 | 0.6617 | 39.5456 | 0.2741 | 3.1156   |
| Stroke | MF0040 | Weighted median           | 37 | 0.0984  | 0.1634 | 0.5471 | 0.0095  | 0.0215 | 0.6617 | 39.5456 | 0.2741 | 3.1156   |
| Stroke | MF0040 | Inverse variance weighted | 37 | -0.0105 | 0.1165 | 0.9285 | 0.0095  | 0.0215 | 0.6617 | 39.5456 | 0.2741 | 3.1156   |
| Stroke | MF0040 | Simple mode               | 37 | 0.2118  | 0.3716 | 0.5723 | 0.0095  | 0.0215 | 0.6617 | 39.5456 | 0.2741 | 3.1156   |
| Stroke | MF0040 | Weighted mode             | 37 | 0.2409  | 0.3342 | 0.4757 | 0.0095  | 0.0215 | 0.6617 | 39.5456 | 0.2741 | 3.1156   |
| Stroke | MF0041 | MR Egger                  | 37 | -0.0142 | 0.1755 | 0.9361 | 0.0042  | 0.0105 | 0.6929 | 37.1431 | 0.3705 | 21.2510  |
| Stroke | MF0041 | Weighted median           | 37 | 0.0680  | 0.0808 | 0.3998 | 0.0042  | 0.0105 | 0.6929 | 37.1431 | 0.3705 | 21.2510  |
| Stroke | MF0041 | Inverse variance weighted | 37 | 0.0519  | 0.0567 | 0.3602 | 0.0042  | 0.0105 | 0.6929 | 37.1431 | 0.3705 | 21.2510  |
| Stroke | MF0041 | Simple mode               | 37 | 0.0863  | 0.1878 | 0.6486 | 0.0042  | 0.0105 | 0.6929 | 37.1431 | 0.3705 | 21.2510  |
| Stroke | MF0041 | Weighted mode             | 37 | 0.0474  | 0.1543 | 0.7605 | 0.0042  | 0.0105 | 0.6929 | 37.1431 | 0.3705 | 21.2510  |
| Stroke | MF0043 | MR Egger                  | 37 | 0.0166  | 0.1882 | 0.9303 | 0.0054  | 0.0112 | 0.6345 | 22.6828 | 0.9463 | 34.4207  |
| Stroke | MF0043 | Weighted median           | 37 | 0.0418  | 0.0873 | 0.6325 | 0.0054  | 0.0112 | 0.6345 | 22.6828 | 0.9463 | 34.4207  |
| Stroke | MF0043 | Inverse variance weighted | 37 | 0.1019  | 0.0615 | 0.0975 | 0.0054  | 0.0112 | 0.6345 | 22.6828 | 0.9463 | 34.4207  |
| Stroke | MF0043 | Simple mode               | 37 | 0.0322  | 0.1746 | 0.8547 | 0.0054  | 0.0112 | 0.6345 | 22.6828 | 0.9463 | 34.4207  |

|        |        |                           |    |         |        |        |         |        |        |         |        |          |
|--------|--------|---------------------------|----|---------|--------|--------|---------|--------|--------|---------|--------|----------|
| Stroke | MF0043 | Weighted mode             | 37 | 0.0026  | 0.1559 | 0.9869 | 0.0054  | 0.0112 | 0.6345 | 22.6828 | 0.9463 | 34.4207  |
| Stroke | MF0044 | MR Egger                  | 37 | -0.0139 | 0.0551 | 0.8019 | -0.0003 | 0.0033 | 0.9380 | 23.4059 | 0.9326 | 155.6568 |
| Stroke | MF0044 | Weighted median           | 37 | -0.0110 | 0.0243 | 0.6510 | -0.0003 | 0.0033 | 0.9380 | 23.4059 | 0.9326 | 155.6568 |
| Stroke | MF0044 | Inverse variance weighted | 37 | -0.0180 | 0.0180 | 0.3172 | -0.0003 | 0.0033 | 0.9380 | 23.4059 | 0.9326 | 155.6568 |
| Stroke | MF0044 | Simple mode               | 37 | -0.0006 | 0.0438 | 0.9883 | -0.0003 | 0.0033 | 0.9380 | 23.4059 | 0.9326 | 155.6568 |
| Stroke | MF0044 | Weighted mode             | 37 | -0.0006 | 0.0402 | 0.9873 | -0.0003 | 0.0033 | 0.9380 | 23.4059 | 0.9326 | 155.6568 |
| Stroke | MF0045 | MR Egger                  | 37 | 0.0065  | 0.0724 | 0.9291 | -0.0016 | 0.0043 | 0.7128 | 22.6368 | 0.9471 | 87.5779  |
| Stroke | MF0045 | Weighted median           | 37 | 0.0060  | 0.0329 | 0.8547 | -0.0016 | 0.0043 | 0.7128 | 22.6368 | 0.9471 | 87.5779  |
| Stroke | MF0045 | Inverse variance weighted | 37 | -0.0189 | 0.0237 | 0.4243 | -0.0016 | 0.0043 | 0.7128 | 22.6368 | 0.9471 | 87.5779  |
| Stroke | MF0045 | Simple mode               | 37 | 0.0094  | 0.0663 | 0.8886 | -0.0016 | 0.0043 | 0.7128 | 22.6368 | 0.9471 | 87.5779  |
| Stroke | MF0045 | Weighted mode             | 37 | 0.0144  | 0.0590 | 0.8093 | -0.0016 | 0.0043 | 0.7128 | 22.6368 | 0.9471 | 87.5779  |
| Stroke | MF0046 | MR Egger                  | 37 | -0.0276 | 0.2737 | 0.9201 | 0.0014  | 0.0163 | 0.9318 | 37.5414 | 0.3535 | 11.1349  |
| Stroke | MF0046 | Weighted median           | 37 | -0.0633 | 0.1272 | 0.6187 | 0.0014  | 0.0163 | 0.9318 | 37.5414 | 0.3535 | 11.1349  |
| Stroke | MF0046 | Inverse variance weighted | 37 | -0.0054 | 0.0882 | 0.9515 | 0.0014  | 0.0163 | 0.9318 | 37.5414 | 0.3535 | 11.1349  |
| Stroke | MF0046 | Simple mode               | 37 | -0.0616 | 0.2494 | 0.8062 | 0.0014  | 0.0163 | 0.9318 | 37.5414 | 0.3535 | 11.1349  |
| Stroke | MF0046 | Weighted mode             | 37 | -0.0246 | 0.2191 | 0.9112 | 0.0014  | 0.0163 | 0.9318 | 37.5414 | 0.3535 | 11.1349  |
| Stroke | MF0047 | MR Egger                  | 37 | -0.0138 | 0.0839 | 0.8704 | 0.0006  | 0.0050 | 0.9051 | 37.3347 | 0.3623 | 90.1321  |
| Stroke | MF0047 | Weighted median           | 37 | -0.0252 | 0.0414 | 0.5432 | 0.0006  | 0.0050 | 0.9051 | 37.3347 | 0.3623 | 90.1321  |
| Stroke | MF0047 | Inverse variance weighted | 37 | -0.0043 | 0.0270 | 0.8747 | 0.0006  | 0.0050 | 0.9051 | 37.3347 | 0.3623 | 90.1321  |
| Stroke | MF0047 | Simple mode               | 37 | -0.0558 | 0.0807 | 0.4934 | 0.0006  | 0.0050 | 0.9051 | 37.3347 | 0.3623 | 90.1321  |
| Stroke | MF0047 | Weighted mode             | 37 | -0.0310 | 0.0635 | 0.6288 | 0.0006  | 0.0050 | 0.9051 | 37.3347 | 0.3623 | 90.1321  |
| Stroke | MF0048 | MR Egger                  | 37 | -0.0068 | 0.0535 | 0.8990 | 0.0010  | 0.0032 | 0.7585 | 30.9979 | 0.6618 | 146.8373 |
| Stroke | MF0048 | Weighted median           | 37 | 0.0071  | 0.0257 | 0.7827 | 0.0010  | 0.0032 | 0.7585 | 30.9979 | 0.6618 | 146.8373 |
| Stroke | MF0048 | Inverse variance weighted | 37 | 0.0088  | 0.0175 | 0.6135 | 0.0010  | 0.0032 | 0.7585 | 30.9979 | 0.6618 | 146.8373 |
| Stroke | MF0048 | Simple mode               | 37 | 0.0178  | 0.0480 | 0.7134 | 0.0010  | 0.0032 | 0.7585 | 30.9979 | 0.6618 | 146.8373 |
| Stroke | MF0048 | Weighted mode             | 37 | 0.0083  | 0.0432 | 0.8480 | 0.0010  | 0.0032 | 0.7585 | 30.9979 | 0.6618 | 146.8373 |
| Stroke | MF0049 | MR Egger                  | 37 | 0.0077  | 0.0577 | 0.8939 | -0.0006 | 0.0034 | 0.8644 | 27.7694 | 0.8026 | 125.4065 |
| Stroke | MF0049 | Weighted median           | 37 | -0.0040 | 0.0259 | 0.8765 | -0.0006 | 0.0034 | 0.8644 | 27.7694 | 0.8026 | 125.4065 |
| Stroke | MF0049 | Inverse variance weighted | 37 | -0.0016 | 0.0188 | 0.9309 | -0.0006 | 0.0034 | 0.8644 | 27.7694 | 0.8026 | 125.4065 |
| Stroke | MF0049 | Simple mode               | 37 | 0.0055  | 0.0544 | 0.9198 | -0.0006 | 0.0034 | 0.8644 | 27.7694 | 0.8026 | 125.4065 |
| Stroke | MF0049 | Weighted mode             | 37 | 0.0018  | 0.0438 | 0.9682 | -0.0006 | 0.0034 | 0.8644 | 27.7694 | 0.8026 | 125.4065 |
| Stroke | MF0050 | MR Egger                  | 37 | -0.1233 | 0.0788 | 0.1267 | 0.0061  | 0.0047 | 0.2028 | 41.7673 | 0.2345 | 51.3391  |
| Stroke | MF0050 | Weighted median           | 37 | -0.0410 | 0.0349 | 0.2405 | 0.0061  | 0.0047 | 0.2028 | 41.7673 | 0.2345 | 51.3391  |
| Stroke | MF0050 | Inverse variance weighted | 37 | -0.0266 | 0.0260 | 0.3057 | 0.0061  | 0.0047 | 0.2028 | 41.7673 | 0.2345 | 51.3391  |
| Stroke | MF0050 | Simple mode               | 37 | -0.0527 | 0.0789 | 0.5081 | 0.0061  | 0.0047 | 0.2028 | 41.7673 | 0.2345 | 51.3391  |
| Stroke | MF0050 | Weighted mode             | 37 | -0.0341 | 0.0759 | 0.6556 | 0.0061  | 0.0047 | 0.2028 | 41.7673 | 0.2345 | 51.3391  |
| Stroke | MF0051 | MR Egger                  | 37 | 0.0205  | 0.0705 | 0.7728 | -0.0024 | 0.0042 | 0.5702 | 32.1034 | 0.6087 | 93.1741  |
| Stroke | MF0051 | Weighted median           | 37 | -0.0298 | 0.0335 | 0.3740 | -0.0024 | 0.0042 | 0.5702 | 32.1034 | 0.6087 | 93.1741  |
| Stroke | MF0051 | Inverse variance weighted | 37 | -0.0177 | 0.0230 | 0.4428 | -0.0024 | 0.0042 | 0.5702 | 32.1034 | 0.6087 | 93.1741  |
| Stroke | MF0051 | Simple mode               | 37 | -0.0471 | 0.0665 | 0.4830 | -0.0024 | 0.0042 | 0.5702 | 32.1034 | 0.6087 | 93.1741  |
| Stroke | MF0051 | Weighted mode             | 37 | -0.0523 | 0.0627 | 0.4096 | -0.0024 | 0.0042 | 0.5702 | 32.1034 | 0.6087 | 93.1741  |
| Stroke | MF0052 | MR Egger                  | 37 | -0.8444 | 0.7921 | 0.2937 | 0.0558  | 0.0473 | 0.2454 | 57.8861 | 0.0118 | 10.1921  |
| Stroke | MF0052 | Weighted median           | 37 | 0.2361  | 0.3173 | 0.4569 | 0.0558  | 0.0473 | 0.2454 | 57.8861 | 0.0118 | 10.1921  |
| Stroke | MF0052 | Inverse variance weighted | 37 | 0.0400  | 0.2603 | 0.8779 | 0.0558  | 0.0473 | 0.2454 | 57.8861 | 0.0118 | 10.1921  |
| Stroke | MF0052 | Simple mode               | 37 | 0.5167  | 0.5814 | 0.3801 | 0.0558  | 0.0473 | 0.2454 | 57.8861 | 0.0118 | 10.1921  |
| Stroke | MF0052 | Weighted mode             | 37 | 0.3086  | 0.5738 | 0.5941 | 0.0558  | 0.0473 | 0.2454 | 57.8861 | 0.0118 | 10.1921  |
| Stroke | MF0054 | MR Egger                  | 37 | -0.0341 | 0.0714 | 0.6356 | 0.0009  | 0.0043 | 0.8309 | 25.9722 | 0.8659 | 105.8581 |
| Stroke | MF0054 | Weighted median           | 37 | -0.0233 | 0.0319 | 0.4661 | 0.0009  | 0.0043 | 0.8309 | 25.9722 | 0.8659 | 105.8581 |
| Stroke | MF0054 | Inverse variance weighted | 37 | -0.0196 | 0.0233 | 0.4004 | 0.0009  | 0.0043 | 0.8309 | 25.9722 | 0.8659 | 105.8581 |
| Stroke | MF0054 | Simple mode               | 37 | -0.0561 | 0.0702 | 0.4294 | 0.0009  | 0.0043 | 0.8309 | 25.9722 | 0.8659 | 105.8581 |
| Stroke | MF0054 | Weighted mode             | 37 | -0.0322 | 0.0576 | 0.5801 | 0.0009  | 0.0043 | 0.8309 | 25.9722 | 0.8659 | 105.8581 |
| Stroke | MF0055 | MR Egger                  | 37 | -0.0382 | 0.2137 | 0.8591 | 0.0068  | 0.0127 | 0.5963 | 45.8273 | 0.1041 | 15.4472  |
| Stroke | MF0055 | Weighted median           | 37 | 0.1687  | 0.0911 | 0.0640 | 0.0068  | 0.0127 | 0.5963 | 45.8273 | 0.1041 | 15.4472  |
| Stroke | MF0055 | Inverse variance weighted | 37 | 0.0698  | 0.0691 | 0.3130 | 0.0068  | 0.0127 | 0.5963 | 45.8273 | 0.1041 | 15.4472  |
| Stroke | MF0055 | Simple mode               | 37 | 0.1964  | 0.2003 | 0.3335 | 0.0068  | 0.0127 | 0.5963 | 45.8273 | 0.1041 | 15.4472  |
| Stroke | MF0055 | Weighted mode             | 37 | 0.1906  | 0.1940 | 0.3325 | 0.0068  | 0.0127 | 0.5963 | 45.8273 | 0.1041 | 15.4472  |
| Stroke | MF0056 | MR Egger                  | 37 | 0.0390  | 0.2353 | 0.8692 | -0.0030 | 0.0140 | 0.8317 | 31.7745 | 0.6246 | 21.2479  |
| Stroke | MF0056 | Weighted median           | 37 | 0.0120  | 0.1102 | 0.9135 | -0.0030 | 0.0140 | 0.8317 | 31.7745 | 0.6246 | 21.2479  |
| Stroke | MF0056 | Inverse variance weighted | 37 | -0.0086 | 0.0769 | 0.9111 | -0.0030 | 0.0140 | 0.8317 | 31.7745 | 0.6246 | 21.2479  |
| Stroke | MF0056 | Simple mode               | 37 | 0.0754  | 0.2168 | 0.7301 | -0.0030 | 0.0140 | 0.8317 | 31.7745 | 0.6246 | 21.2479  |
| Stroke | MF0056 | Weighted mode             | 37 | 0.0482  | 0.1896 | 0.8008 | -0.0030 | 0.0140 | 0.8317 | 31.7745 | 0.6246 | 21.2479  |

|        |        |                           |    |         |        |        |         |        |        |         |        |          |
|--------|--------|---------------------------|----|---------|--------|--------|---------|--------|--------|---------|--------|----------|
| Stroke | MF0057 | MR Egger                  | 37 | -0.1761 | 0.3480 | 0.6160 | 0.0171  | 0.0208 | 0.4166 | 42.3007 | 0.1849 | 3.4253   |
| Stroke | MF0057 | Weighted median           | 37 | 0.0586  | 0.1618 | 0.7175 | 0.0171  | 0.0208 | 0.4166 | 42.3007 | 0.1849 | 3.4253   |
| Stroke | MF0057 | Inverse variance weighted | 37 | 0.0943  | 0.1132 | 0.4051 | 0.0171  | 0.0208 | 0.4166 | 42.3007 | 0.1849 | 3.4253   |
| Stroke | MF0057 | Simple mode               | 37 | -0.0582 | 0.3870 | 0.8812 | 0.0171  | 0.0208 | 0.4166 | 42.3007 | 0.1849 | 3.4253   |
| Stroke | MF0057 | Weighted mode             | 37 | -0.1290 | 0.3841 | 0.7390 | 0.0171  | 0.0208 | 0.4166 | 42.3007 | 0.1849 | 3.4253   |
| Stroke | MF0058 | MR Egger                  | 37 | 0.0041  | 0.1943 | 0.9832 | 0.0058  | 0.0116 | 0.6176 | 36.3274 | 0.4066 | 23.9019  |
| Stroke | MF0058 | Weighted median           | 37 | 0.0768  | 0.0933 | 0.4103 | 0.0058  | 0.0116 | 0.6176 | 36.3274 | 0.4066 | 23.9019  |
| Stroke | MF0058 | Inverse variance weighted | 37 | 0.0966  | 0.0628 | 0.1241 | 0.0058  | 0.0116 | 0.6176 | 36.3274 | 0.4066 | 23.9019  |
| Stroke | MF0058 | Simple mode               | 37 | 0.3618  | 0.1993 | 0.0778 | 0.0058  | 0.0116 | 0.6176 | 36.3274 | 0.4066 | 23.9019  |
| Stroke | MF0058 | Weighted mode             | 37 | -0.0630 | 0.2135 | 0.7697 | 0.0058  | 0.0116 | 0.6176 | 36.3274 | 0.4066 | 23.9019  |
| Stroke | MF0059 | MR Egger                  | 37 | -0.1940 | 0.4692 | 0.6818 | 0.0145  | 0.0280 | 0.6078 | 43.4845 | 0.1538 | 2.6292   |
| Stroke | MF0059 | Weighted median           | 37 | 0.1978  | 0.2104 | 0.3473 | 0.0145  | 0.0280 | 0.6078 | 43.4845 | 0.1538 | 2.6292   |
| Stroke | MF0059 | Inverse variance weighted | 37 | 0.0357  | 0.1518 | 0.8140 | 0.0145  | 0.0280 | 0.6078 | 43.4845 | 0.1538 | 2.6292   |
| Stroke | MF0059 | Simple mode               | 37 | 0.2714  | 0.4413 | 0.5424 | 0.0145  | 0.0280 | 0.6078 | 43.4845 | 0.1538 | 2.6292   |
| Stroke | MF0059 | Weighted mode             | 37 | 0.3396  | 0.3901 | 0.3898 | 0.0145  | 0.0280 | 0.6078 | 43.4845 | 0.1538 | 2.6292   |
| Stroke | MF0060 | MR Egger                  | 37 | 0.0593  | 0.1970 | 0.7653 | -0.0006 | 0.0118 | 0.9596 | 30.4540 | 0.6873 | 20.6809  |
| Stroke | MF0060 | Weighted median           | 37 | 0.0506  | 0.0942 | 0.5912 | -0.0006 | 0.0118 | 0.9596 | 30.4540 | 0.6873 | 20.6809  |
| Stroke | MF0060 | Inverse variance weighted | 37 | 0.0498  | 0.0644 | 0.4394 | -0.0006 | 0.0118 | 0.9596 | 30.4540 | 0.6873 | 20.6809  |
| Stroke | MF0060 | Simple mode               | 37 | 0.2546  | 0.2055 | 0.2234 | -0.0006 | 0.0118 | 0.9596 | 30.4540 | 0.6873 | 20.6809  |
| Stroke | MF0060 | Weighted mode             | 37 | -0.2081 | 0.2250 | 0.3611 | -0.0006 | 0.0118 | 0.9596 | 30.4540 | 0.6873 | 20.6809  |
| Stroke | MF0061 | MR Egger                  | 37 | -0.0538 | 0.1647 | 0.7457 | 0.0055  | 0.0098 | 0.5765 | 40.7930 | 0.2308 | 22.7938  |
| Stroke | MF0061 | Weighted median           | 37 | 0.0353  | 0.0768 | 0.6458 | 0.0055  | 0.0098 | 0.5765 | 40.7930 | 0.2308 | 22.7938  |
| Stroke | MF0061 | Inverse variance weighted | 37 | 0.0339  | 0.0533 | 0.5245 | 0.0055  | 0.0098 | 0.5765 | 40.7930 | 0.2308 | 22.7938  |
| Stroke | MF0061 | Simple mode               | 37 | -0.1819 | 0.1790 | 0.3164 | 0.0055  | 0.0098 | 0.5765 | 40.7930 | 0.2308 | 22.7938  |
| Stroke | MF0061 | Weighted mode             | 37 | -0.1488 | 0.1804 | 0.4149 | 0.0055  | 0.0098 | 0.5765 | 40.7930 | 0.2308 | 22.7938  |
| Stroke | MF0062 | MR Egger                  | 37 | -0.1059 | 0.3317 | 0.7515 | 0.0088  | 0.0198 | 0.6606 | 44.9136 | 0.1217 | 8.1957   |
| Stroke | MF0062 | Weighted median           | 37 | -0.0689 | 0.1412 | 0.6259 | 0.0088  | 0.0198 | 0.6606 | 44.9136 | 0.1217 | 8.1957   |
| Stroke | MF0062 | Inverse variance weighted | 37 | 0.0330  | 0.1072 | 0.7584 | 0.0088  | 0.0198 | 0.6606 | 44.9136 | 0.1217 | 8.1957   |
| Stroke | MF0062 | Simple mode               | 37 | -0.2878 | 0.3598 | 0.4290 | 0.0088  | 0.0198 | 0.6606 | 44.9136 | 0.1217 | 8.1957   |
| Stroke | MF0062 | Weighted mode             | 37 | -0.3717 | 0.3343 | 0.2735 | 0.0088  | 0.0198 | 0.6606 | 44.9136 | 0.1217 | 8.1957   |
| Stroke | MF0063 | MR Egger                  | 37 | 0.0269  | 0.0770 | 0.7285 | -0.0005 | 0.0046 | 0.9091 | 55.1808 | 0.0163 | 62.6109  |
| Stroke | MF0063 | Weighted median           | 37 | 0.0095  | 0.0302 | 0.7523 | -0.0005 | 0.0046 | 0.9091 | 55.1808 | 0.0163 | 62.6109  |
| Stroke | MF0063 | Inverse variance weighted | 37 | 0.0186  | 0.0248 | 0.4542 | -0.0005 | 0.0046 | 0.9091 | 55.1808 | 0.0163 | 62.6109  |
| Stroke | MF0063 | Simple mode               | 37 | -0.0721 | 0.0718 | 0.3216 | -0.0005 | 0.0046 | 0.9091 | 55.1808 | 0.0163 | 62.6109  |
| Stroke | MF0063 | Weighted mode             | 37 | -0.0671 | 0.0718 | 0.3565 | -0.0005 | 0.0046 | 0.9091 | 55.1808 | 0.0163 | 62.6109  |
| Stroke | MF0064 | MR Egger                  | 37 | 0.2886  | 0.2809 | 0.3112 | -0.0233 | 0.0168 | 0.1732 | 37.1525 | 0.4157 | 7.5113   |
| Stroke | MF0064 | Weighted median           | 37 | -0.1629 | 0.1381 | 0.2381 | -0.0233 | 0.0168 | 0.1732 | 37.1525 | 0.4157 | 7.5113   |
| Stroke | MF0064 | Inverse variance weighted | 37 | -0.0805 | 0.0930 | 0.3867 | -0.0233 | 0.0168 | 0.1732 | 37.1525 | 0.4157 | 7.5113   |
| Stroke | MF0064 | Simple mode               | 37 | 0.3004  | 0.3133 | 0.3441 | -0.0233 | 0.0168 | 0.1732 | 37.1525 | 0.4157 | 7.5113   |
| Stroke | MF0064 | Weighted mode             | 37 | -0.2561 | 0.2304 | 0.2737 | -0.0233 | 0.0168 | 0.1732 | 37.1525 | 0.4157 | 7.5113   |
| Stroke | MF0065 | MR Egger                  | 37 | -0.0289 | 0.0528 | 0.5880 | 0.0028  | 0.0031 | 0.3862 | 35.4026 | 0.4492 | 143.2401 |
| Stroke | MF0065 | Weighted median           | 37 | 0.0037  | 0.0247 | 0.8816 | 0.0028  | 0.0031 | 0.3862 | 35.4026 | 0.4492 | 143.2401 |
| Stroke | MF0065 | Inverse variance weighted | 37 | 0.0149  | 0.0172 | 0.3857 | 0.0028  | 0.0031 | 0.3862 | 35.4026 | 0.4492 | 143.2401 |
| Stroke | MF0065 | Simple mode               | 37 | 0.0403  | 0.0534 | 0.4555 | 0.0028  | 0.0031 | 0.3862 | 35.4026 | 0.4492 | 143.2401 |
| Stroke | MF0065 | Weighted mode             | 37 | -0.0011 | 0.0435 | 0.9800 | 0.0028  | 0.0031 | 0.3862 | 35.4026 | 0.4492 | 143.2401 |
| Stroke | MF0066 | MR Egger                  | 37 | -0.1410 | 0.1798 | 0.4382 | 0.0116  | 0.0107 | 0.2882 | 32.9522 | 0.6143 | 25.5186  |
| Stroke | MF0066 | Weighted median           | 37 | 0.0040  | 0.0867 | 0.9629 | 0.0116  | 0.0107 | 0.2882 | 32.9522 | 0.6143 | 25.5186  |
| Stroke | MF0066 | Inverse variance weighted | 37 | 0.0422  | 0.0588 | 0.4722 | 0.0116  | 0.0107 | 0.2882 | 32.9522 | 0.6143 | 25.5186  |
| Stroke | MF0066 | Simple mode               | 37 | 0.0008  | 0.2012 | 0.9970 | 0.0116  | 0.0107 | 0.2882 | 32.9522 | 0.6143 | 25.5186  |
| Stroke | MF0066 | Weighted mode             | 37 | -0.0670 | 0.1897 | 0.7259 | 0.0116  | 0.0107 | 0.2882 | 32.9522 | 0.6143 | 25.5186  |
| Stroke | MF0067 | MR Egger                  | 37 | -0.0300 | 0.0540 | 0.5817 | 0.0022  | 0.0032 | 0.4985 | 43.1336 | 0.1626 | 115.8244 |
| Stroke | MF0067 | Weighted median           | 37 | -0.0001 | 0.0234 | 0.9961 | 0.0022  | 0.0032 | 0.4985 | 43.1336 | 0.1626 | 115.8244 |
| Stroke | MF0067 | Inverse variance weighted | 37 | 0.0049  | 0.0175 | 0.7806 | 0.0022  | 0.0032 | 0.4985 | 43.1336 | 0.1626 | 115.8244 |
| Stroke | MF0067 | Simple mode               | 37 | -0.0025 | 0.0492 | 0.9592 | 0.0022  | 0.0032 | 0.4985 | 43.1336 | 0.1626 | 115.8244 |
| Stroke | MF0067 | Weighted mode             | 37 | -0.0236 | 0.0480 | 0.6255 | 0.0022  | 0.0032 | 0.4985 | 43.1336 | 0.1626 | 115.8244 |
| Stroke | MF0068 | MR Egger                  | 37 | -0.0194 | 0.0444 | 0.6639 | 0.0016  | 0.0026 | 0.5528 | 33.9676 | 0.5178 | 144.1490 |
| Stroke | MF0068 | Weighted median           | 37 | 0.0026  | 0.0208 | 0.8990 | 0.0016  | 0.0026 | 0.5528 | 33.9676 | 0.5178 | 144.1490 |
| Stroke | MF0068 | Inverse variance weighted | 37 | 0.0057  | 0.0145 | 0.6949 | 0.0016  | 0.0026 | 0.5528 | 33.9676 | 0.5178 | 144.1490 |
| Stroke | MF0068 | Simple mode               | 37 | 0.0071  | 0.0406 | 0.8616 | 0.0016  | 0.0026 | 0.5528 | 33.9676 | 0.5178 | 144.1490 |
| Stroke | MF0068 | Weighted mode             | 37 | -0.0052 | 0.0374 | 0.8906 | 0.0016  | 0.0026 | 0.5528 | 33.9676 | 0.5178 | 144.1490 |
| Stroke | MF0069 | MR Egger                  | 37 | -0.2641 | 0.2426 | 0.2837 | 0.0181  | 0.0145 | 0.2195 | 28.0914 | 0.8239 | 13.1909  |

|        |        |                           |    |         |        |        |        |        |        |         |        |          |
|--------|--------|---------------------------|----|---------|--------|--------|--------|--------|--------|---------|--------|----------|
| Stroke | MF0069 | Weighted median           | 37 | 0.0475  | 0.1194 | 0.6909 | 0.0181 | 0.0145 | 0.2195 | 28.0914 | 0.8239 | 13.1909  |
| Stroke | MF0069 | Inverse variance weighted | 37 | 0.0225  | 0.0793 | 0.7763 | 0.0181 | 0.0145 | 0.2195 | 28.0914 | 0.8239 | 13.1909  |
| Stroke | MF0069 | Simple mode               | 37 | 0.0545  | 0.2350 | 0.8180 | 0.0181 | 0.0145 | 0.2195 | 28.0914 | 0.8239 | 13.1909  |
| Stroke | MF0069 | Weighted mode             | 37 | 0.0104  | 0.2077 | 0.9602 | 0.0181 | 0.0145 | 0.2195 | 28.0914 | 0.8239 | 13.1909  |
| Stroke | MF0070 | MR Egger                  | 37 | -0.1240 | 0.2906 | 0.6721 | 0.0069 | 0.0173 | 0.6920 | 31.5650 | 0.6347 | 5.6986   |
| Stroke | MF0070 | Weighted median           | 37 | 0.0147  | 0.1324 | 0.9117 | 0.0069 | 0.0173 | 0.6920 | 31.5650 | 0.6347 | 5.6986   |
| Stroke | MF0070 | Inverse variance weighted | 37 | -0.0144 | 0.0950 | 0.8798 | 0.0069 | 0.0173 | 0.6920 | 31.5650 | 0.6347 | 5.6986   |
| Stroke | MF0070 | Simple mode               | 37 | 0.1078  | 0.2811 | 0.7036 | 0.0069 | 0.0173 | 0.6920 | 31.5650 | 0.6347 | 5.6986   |
| Stroke | MF0070 | Weighted mode             | 37 | 0.0927  | 0.2512 | 0.7143 | 0.0069 | 0.0173 | 0.6920 | 31.5650 | 0.6347 | 5.6986   |
| Stroke | MF0071 | MR Egger                  | 37 | -0.0044 | 0.0370 | 0.9061 | 0.0005 | 0.0022 | 0.8329 | 25.4635 | 0.8814 | 260.1914 |
| Stroke | MF0071 | Weighted median           | 37 | -0.0121 | 0.0167 | 0.4673 | 0.0005 | 0.0022 | 0.8329 | 25.4635 | 0.8814 | 260.1914 |
| Stroke | MF0071 | Inverse variance weighted | 37 | 0.0030  | 0.0121 | 0.8015 | 0.0005 | 0.0022 | 0.8329 | 25.4635 | 0.8814 | 260.1914 |
| Stroke | MF0071 | Simple mode               | 37 | -0.0248 | 0.0352 | 0.4859 | 0.0005 | 0.0022 | 0.8329 | 25.4635 | 0.8814 | 260.1914 |
| Stroke | MF0071 | Weighted mode             | 37 | -0.0292 | 0.0312 | 0.3553 | 0.0005 | 0.0022 | 0.8329 | 25.4635 | 0.8814 | 260.1914 |
| Stroke | MF0072 | MR Egger                  | 37 | -0.2270 | 0.3060 | 0.4632 | 0.0137 | 0.0183 | 0.4565 | 42.0709 | 0.1914 | 5.5794   |
| Stroke | MF0072 | Weighted median           | 37 | -0.0574 | 0.1350 | 0.6705 | 0.0137 | 0.0183 | 0.4565 | 42.0709 | 0.1914 | 5.5794   |
| Stroke | MF0072 | Inverse variance weighted | 37 | -0.0093 | 0.0994 | 0.9258 | 0.0137 | 0.0183 | 0.4565 | 42.0709 | 0.1914 | 5.5794   |
| Stroke | MF0072 | Simple mode               | 37 | -0.1114 | 0.2887 | 0.7019 | 0.0137 | 0.0183 | 0.4565 | 42.0709 | 0.1914 | 5.5794   |
| Stroke | MF0072 | Weighted mode             | 37 | -0.0834 | 0.2456 | 0.7361 | 0.0137 | 0.0183 | 0.4565 | 42.0709 | 0.1914 | 5.5794   |
| Stroke | MF0073 | MR Egger                  | 37 | -0.0149 | 0.0570 | 0.7945 | 0.0015 | 0.0034 | 0.6570 | 24.7887 | 0.9002 | 159.5927 |
| Stroke | MF0073 | Weighted median           | 37 | 0.0136  | 0.0267 | 0.6115 | 0.0015 | 0.0034 | 0.6570 | 24.7887 | 0.9002 | 159.5927 |
| Stroke | MF0073 | Inverse variance weighted | 37 | 0.0092  | 0.0186 | 0.6225 | 0.0015 | 0.0034 | 0.6570 | 24.7887 | 0.9002 | 159.5927 |
| Stroke | MF0073 | Simple mode               | 37 | 0.0253  | 0.0551 | 0.6496 | 0.0015 | 0.0034 | 0.6570 | 24.7887 | 0.9002 | 159.5927 |
| Stroke | MF0073 | Weighted mode             | 37 | 0.0253  | 0.0531 | 0.6371 | 0.0015 | 0.0034 | 0.6570 | 24.7887 | 0.9002 | 159.5927 |
| Stroke | MF0074 | MR Egger                  | 37 | -0.0231 | 0.0583 | 0.6937 | 0.0013 | 0.0035 | 0.7053 | 34.1299 | 0.5099 | 111.3594 |
| Stroke | MF0074 | Weighted median           | 37 | -0.0202 | 0.0266 | 0.4466 | 0.0013 | 0.0035 | 0.7053 | 34.1299 | 0.5099 | 111.3594 |
| Stroke | MF0074 | Inverse variance weighted | 37 | -0.0021 | 0.0190 | 0.9106 | 0.0013 | 0.0035 | 0.7053 | 34.1299 | 0.5099 | 111.3594 |
| Stroke | MF0074 | Simple mode               | 37 | -0.0528 | 0.0539 | 0.3344 | 0.0013 | 0.0035 | 0.7053 | 34.1299 | 0.5099 | 111.3594 |
| Stroke | MF0074 | Weighted mode             | 37 | -0.0215 | 0.0455 | 0.6384 | 0.0013 | 0.0035 | 0.7053 | 34.1299 | 0.5099 | 111.3594 |
| Stroke | MF0075 | MR Egger                  | 37 | -0.0192 | 0.0878 | 0.8278 | 0.0029 | 0.0052 | 0.5866 | 28.7541 | 0.7628 | 65.7851  |
| Stroke | MF0075 | Weighted median           | 37 | 0.0029  | 0.0397 | 0.9422 | 0.0029 | 0.0052 | 0.5866 | 28.7541 | 0.7628 | 65.7851  |
| Stroke | MF0075 | Inverse variance weighted | 37 | 0.0263  | 0.0287 | 0.3592 | 0.0029 | 0.0052 | 0.5866 | 28.7541 | 0.7628 | 65.7851  |
| Stroke | MF0075 | Simple mode               | 37 | -0.0061 | 0.0793 | 0.9396 | 0.0029 | 0.0052 | 0.5866 | 28.7541 | 0.7628 | 65.7851  |
| Stroke | MF0075 | Weighted mode             | 37 | 0.0296  | 0.0627 | 0.6398 | 0.0029 | 0.0052 | 0.5866 | 28.7541 | 0.7628 | 65.7851  |
| Stroke | MF0076 | MR Egger                  | 37 | 0.0718  | 0.3024 | 0.8136 | 0.0025 | 0.0180 | 0.8889 | 51.7136 | 0.0341 | 6.8925   |
| Stroke | MF0076 | Weighted median           | 37 | 0.1130  | 0.1243 | 0.3636 | 0.0025 | 0.0180 | 0.8889 | 51.7136 | 0.0341 | 6.8925   |
| Stroke | MF0076 | Inverse variance weighted | 37 | 0.1120  | 0.0975 | 0.2503 | 0.0025 | 0.0180 | 0.8889 | 51.7136 | 0.0341 | 6.8925   |
| Stroke | MF0076 | Simple mode               | 37 | 0.0925  | 0.2778 | 0.7410 | 0.0025 | 0.0180 | 0.8889 | 51.7136 | 0.0341 | 6.8925   |
| Stroke | MF0076 | Weighted mode             | 37 | 0.1189  | 0.2579 | 0.6476 | 0.0025 | 0.0180 | 0.8889 | 51.7136 | 0.0341 | 6.8925   |
| Stroke | MF0077 | MR Egger                  | 37 | -0.1288 | 0.1745 | 0.4654 | 0.0053 | 0.0104 | 0.6112 | 25.6901 | 0.8746 | 15.2152  |
| Stroke | MF0077 | Weighted median           | 37 | -0.0105 | 0.0813 | 0.8967 | 0.0053 | 0.0104 | 0.6112 | 25.6901 | 0.8746 | 15.2152  |
| Stroke | MF0077 | Inverse variance weighted | 37 | -0.0442 | 0.0570 | 0.4386 | 0.0053 | 0.0104 | 0.6112 | 25.6901 | 0.8746 | 15.2152  |
| Stroke | MF0077 | Simple mode               | 37 | 0.0371  | 0.1884 | 0.8449 | 0.0053 | 0.0104 | 0.6112 | 25.6901 | 0.8746 | 15.2152  |
| Stroke | MF0077 | Weighted mode             | 37 | 0.0652  | 0.1696 | 0.7032 | 0.0053 | 0.0104 | 0.6112 | 25.6901 | 0.8746 | 15.2152  |
| Stroke | MF0078 | MR Egger                  | 37 | -0.1549 | 0.1590 | 0.3368 | 0.0087 | 0.0095 | 0.3640 | 42.1334 | 0.1896 | 22.1662  |
| Stroke | MF0078 | Weighted median           | 37 | -0.0536 | 0.0709 | 0.4499 | 0.0087 | 0.0095 | 0.3640 | 42.1334 | 0.1896 | 22.1662  |
| Stroke | MF0078 | Inverse variance weighted | 37 | -0.0166 | 0.0519 | 0.7483 | 0.0087 | 0.0095 | 0.3640 | 42.1334 | 0.1896 | 22.1662  |
| Stroke | MF0078 | Simple mode               | 37 | -0.1128 | 0.1736 | 0.5199 | 0.0087 | 0.0095 | 0.3640 | 42.1334 | 0.1896 | 22.1662  |
| Stroke | MF0078 | Weighted mode             | 37 | -0.1483 | 0.1587 | 0.3564 | 0.0087 | 0.0095 | 0.3640 | 42.1334 | 0.1896 | 22.1662  |
| Stroke | MF0079 | MR Egger                  | 37 | 0.0309  | 0.2792 | 0.9126 | 0.0020 | 0.0167 | 0.9070 | 35.8106 | 0.4302 | 10.1659  |
| Stroke | MF0079 | Weighted median           | 37 | 0.1735  | 0.1288 | 0.1780 | 0.0020 | 0.0167 | 0.9070 | 35.8106 | 0.4302 | 10.1659  |
| Stroke | MF0079 | Inverse variance weighted | 37 | 0.0620  | 0.0902 | 0.4922 | 0.0020 | 0.0167 | 0.9070 | 35.8106 | 0.4302 | 10.1659  |
| Stroke | MF0079 | Simple mode               | 37 | 0.2622  | 0.2557 | 0.3119 | 0.0020 | 0.0167 | 0.9070 | 35.8106 | 0.4302 | 10.1659  |
| Stroke | MF0079 | Weighted mode             | 37 | 0.2468  | 0.2152 | 0.2591 | 0.0020 | 0.0167 | 0.9070 | 35.8106 | 0.4302 | 10.1659  |
| Stroke | MF0080 | MR Egger                  | 37 | -0.1487 | 0.2464 | 0.5501 | 0.0117 | 0.0147 | 0.4310 | 49.0982 | 0.0573 | 8.0661   |
| Stroke | MF0080 | Weighted median           | 37 | 0.1475  | 0.1008 | 0.1434 | 0.0117 | 0.0147 | 0.4310 | 49.0982 | 0.0573 | 8.0661   |
| Stroke | MF0080 | Inverse variance weighted | 37 | 0.0368  | 0.0801 | 0.6457 | 0.0117 | 0.0147 | 0.4310 | 49.0982 | 0.0573 | 8.0661   |
| Stroke | MF0080 | Simple mode               | 37 | 0.3470  | 0.2032 | 0.0964 | 0.0117 | 0.0147 | 0.4310 | 49.0982 | 0.0573 | 8.0661   |
| Stroke | MF0080 | Weighted mode             | 37 | 0.3470  | 0.1960 | 0.0852 | 0.0117 | 0.0147 | 0.4310 | 49.0982 | 0.0573 | 8.0661   |
| Stroke | MF0081 | MR Egger                  | 37 | 0.1364  | 0.5340 | 0.7998 | 0.0162 | 0.0319 | 0.6137 | 47.0447 | 0.0839 | 2.8942   |
| Stroke | MF0081 | Weighted median           | 37 | 0.2575  | 0.2218 | 0.2456 | 0.0162 | 0.0319 | 0.6137 | 47.0447 | 0.0839 | 2.8942   |

|        |        |                           |    |         |        |        |         |        |        |         |        |          |
|--------|--------|---------------------------|----|---------|--------|--------|---------|--------|--------|---------|--------|----------|
| Stroke | MF0081 | Inverse variance weighted | 37 | 0.3935  | 0.1726 | 0.0227 | 0.0162  | 0.0319 | 0.6137 | 47.0447 | 0.0839 | 2.8942   |
| Stroke | MF0081 | Simple mode               | 37 | 0.0635  | 0.4694 | 0.8932 | 0.0162  | 0.0319 | 0.6137 | 47.0447 | 0.0839 | 2.8942   |
| Stroke | MF0081 | Weighted mode             | 37 | 0.0780  | 0.3793 | 0.8383 | 0.0162  | 0.0319 | 0.6137 | 47.0447 | 0.0839 | 2.8942   |
| Stroke | MF0082 | MR Egger                  | 37 | -0.3862 | 0.4106 | 0.3534 | 0.0297  | 0.0245 | 0.2338 | 48.9249 | 0.0738 | 2.9891   |
| Stroke | MF0082 | Weighted median           | 37 | 0.1466  | 0.1718 | 0.3933 | 0.0297  | 0.0245 | 0.2338 | 48.9249 | 0.0738 | 2.9891   |
| Stroke | MF0082 | Inverse variance weighted | 37 | 0.0839  | 0.1351 | 0.5345 | 0.0297  | 0.0245 | 0.2338 | 48.9249 | 0.0738 | 2.9891   |
| Stroke | MF0082 | Simple mode               | 37 | 0.3236  | 0.3502 | 0.3616 | 0.0297  | 0.0245 | 0.2338 | 48.9249 | 0.0738 | 2.9891   |
| Stroke | MF0082 | Weighted mode             | 37 | 0.2264  | 0.3259 | 0.4917 | 0.0297  | 0.0245 | 0.2338 | 48.9249 | 0.0738 | 2.9891   |
| Stroke | MF0083 | MR Egger                  | 37 | 0.5858  | 0.3642 | 0.1168 | -0.0327 | 0.0217 | 0.1415 | 31.7308 | 0.6719 | 1.5569   |
| Stroke | MF0083 | Weighted median           | 37 | 0.1044  | 0.1654 | 0.5278 | -0.0327 | 0.0217 | 0.1415 | 31.7308 | 0.6719 | 1.5569   |
| Stroke | MF0083 | Inverse variance weighted | 37 | 0.0680  | 0.1190 | 0.5679 | -0.0327 | 0.0217 | 0.1415 | 31.7308 | 0.6719 | 1.5569   |
| Stroke | MF0083 | Simple mode               | 37 | 0.1486  | 0.2791 | 0.5979 | -0.0327 | 0.0217 | 0.1415 | 31.7308 | 0.6719 | 1.5569   |
| Stroke | MF0083 | Weighted mode             | 37 | 0.1486  | 0.2638 | 0.5768 | -0.0327 | 0.0217 | 0.1415 | 31.7308 | 0.6719 | 1.5569   |
| Stroke | MF0084 | MR Egger                  | 37 | 0.0676  | 0.7388 | 0.9276 | 0.0114  | 0.0441 | 0.7975 | 39.6560 | 0.2701 | 4.5199   |
| Stroke | MF0084 | Weighted median           | 37 | 0.2007  | 0.3118 | 0.5198 | 0.0114  | 0.0441 | 0.7975 | 39.6560 | 0.2701 | 4.5199   |
| Stroke | MF0084 | Inverse variance weighted | 37 | 0.2481  | 0.2382 | 0.2978 | 0.0114  | 0.0441 | 0.7975 | 39.6560 | 0.2701 | 4.5199   |
| Stroke | MF0084 | Simple mode               | 37 | 0.1674  | 0.5616 | 0.7674 | 0.0114  | 0.0441 | 0.7975 | 39.6560 | 0.2701 | 4.5199   |
| Stroke | MF0084 | Weighted mode             | 37 | 0.1904  | 0.4922 | 0.7011 | 0.0114  | 0.0441 | 0.7975 | 39.6560 | 0.2701 | 4.5199   |
| Stroke | MF0085 | MR Egger                  | 37 | -0.0100 | 0.2951 | 0.9732 | 0.0064  | 0.0176 | 0.7204 | 37.3488 | 0.3617 | 8.0291   |
| Stroke | MF0085 | Weighted median           | 37 | 0.1329  | 0.1392 | 0.3395 | 0.0064  | 0.0176 | 0.7204 | 37.3488 | 0.3617 | 8.0291   |
| Stroke | MF0085 | Inverse variance weighted | 37 | 0.0907  | 0.0953 | 0.3414 | 0.0064  | 0.0176 | 0.7204 | 37.3488 | 0.3617 | 8.0291   |
| Stroke | MF0085 | Simple mode               | 37 | 0.4076  | 0.2950 | 0.1755 | 0.0064  | 0.0176 | 0.7204 | 37.3488 | 0.3617 | 8.0291   |
| Stroke | MF0085 | Weighted mode             | 37 | 0.2946  | 0.2986 | 0.3304 | 0.0064  | 0.0176 | 0.7204 | 37.3488 | 0.3617 | 8.0291   |
| Stroke | MF0086 | MR Egger                  | 37 | -0.0301 | 0.0443 | 0.5016 | 0.0015  | 0.0026 | 0.5643 | 31.2530 | 0.6497 | 158.8976 |
| Stroke | MF0086 | Weighted median           | 37 | -0.0027 | 0.0209 | 0.8960 | 0.0015  | 0.0026 | 0.5643 | 31.2530 | 0.6497 | 158.8976 |
| Stroke | MF0086 | Inverse variance weighted | 37 | -0.0057 | 0.0145 | 0.6930 | 0.0015  | 0.0026 | 0.5643 | 31.2530 | 0.6497 | 158.8976 |
| Stroke | MF0086 | Simple mode               | 37 | 0.0223  | 0.0470 | 0.6381 | 0.0015  | 0.0026 | 0.5643 | 31.2530 | 0.6497 | 158.8976 |
| Stroke | MF0086 | Weighted mode             | 37 | 0.0145  | 0.0406 | 0.7241 | 0.0015  | 0.0026 | 0.5643 | 31.2530 | 0.6497 | 158.8976 |
| Stroke | MF0087 | MR Egger                  | 37 | 0.0499  | 0.1698 | 0.7707 | 0.0003  | 0.0101 | 0.9731 | 28.9468 | 0.7546 | 23.9799  |
| Stroke | MF0087 | Weighted median           | 37 | 0.0328  | 0.0796 | 0.6800 | 0.0003  | 0.0101 | 0.9731 | 28.9468 | 0.7546 | 23.9799  |
| Stroke | MF0087 | Inverse variance weighted | 37 | 0.0553  | 0.0555 | 0.3186 | 0.0003  | 0.0101 | 0.9731 | 28.9468 | 0.7546 | 23.9799  |
| Stroke | MF0087 | Simple mode               | 37 | 0.1065  | 0.1612 | 0.5131 | 0.0003  | 0.0101 | 0.9731 | 28.9468 | 0.7546 | 23.9799  |
| Stroke | MF0087 | Weighted mode             | 37 | 0.0370  | 0.1321 | 0.7810 | 0.0003  | 0.0101 | 0.9731 | 28.9468 | 0.7546 | 23.9799  |
| Stroke | MF0088 | MR Egger                  | 37 | -0.1256 | 0.1539 | 0.4200 | 0.0099  | 0.0092 | 0.2899 | 43.6524 | 0.1782 | 24.3196  |
| Stroke | MF0088 | Weighted median           | 37 | 0.0298  | 0.0706 | 0.6731 | 0.0099  | 0.0092 | 0.2899 | 43.6524 | 0.1782 | 24.3196  |
| Stroke | MF0088 | Inverse variance weighted | 37 | 0.0307  | 0.0504 | 0.5423 | 0.0099  | 0.0092 | 0.2899 | 43.6524 | 0.1782 | 24.3196  |
| Stroke | MF0088 | Simple mode               | 37 | 0.0302  | 0.1356 | 0.8251 | 0.0099  | 0.0092 | 0.2899 | 43.6524 | 0.1782 | 24.3196  |
| Stroke | MF0088 | Weighted mode             | 37 | 0.0348  | 0.1189 | 0.7717 | 0.0099  | 0.0092 | 0.2899 | 43.6524 | 0.1782 | 24.3196  |
| Stroke | MF0089 | MR Egger                  | 37 | 0.0304  | 0.1919 | 0.8749 | 0.0039  | 0.0114 | 0.7323 | 24.3691 | 0.9109 | 26.3784  |
| Stroke | MF0089 | Weighted median           | 37 | 0.0945  | 0.0894 | 0.2906 | 0.0039  | 0.0114 | 0.7323 | 24.3691 | 0.9109 | 26.3784  |
| Stroke | MF0089 | Inverse variance weighted | 37 | 0.0930  | 0.0627 | 0.1382 | 0.0039  | 0.0114 | 0.7323 | 24.3691 | 0.9109 | 26.3784  |
| Stroke | MF0089 | Simple mode               | 37 | 0.1565  | 0.1655 | 0.3506 | 0.0039  | 0.0114 | 0.7323 | 24.3691 | 0.9109 | 26.3784  |
| Stroke | MF0089 | Weighted mode             | 37 | 0.1068  | 0.1420 | 0.4568 | 0.0039  | 0.0114 | 0.7323 | 24.3691 | 0.9109 | 26.3784  |
| Stroke | MF0090 | MR Egger                  | 37 | -0.1559 | 0.1783 | 0.3879 | 0.0109  | 0.0106 | 0.3124 | 43.8713 | 0.1724 | 18.7496  |
| Stroke | MF0090 | Weighted median           | 37 | 0.0863  | 0.0800 | 0.2811 | 0.0109  | 0.0106 | 0.3124 | 43.8713 | 0.1724 | 18.7496  |
| Stroke | MF0090 | Inverse variance weighted | 37 | 0.0168  | 0.0584 | 0.7734 | 0.0109  | 0.0106 | 0.3124 | 43.8713 | 0.1724 | 18.7496  |
| Stroke | MF0090 | Simple mode               | 37 | 0.1923  | 0.1648 | 0.2507 | 0.0109  | 0.0106 | 0.3124 | 43.8713 | 0.1724 | 18.7496  |
| Stroke | MF0090 | Weighted mode             | 37 | 0.1561  | 0.1548 | 0.3199 | 0.0109  | 0.0106 | 0.3124 | 43.8713 | 0.1724 | 18.7496  |
| Stroke | MF0091 | MR Egger                  | 37 | -0.1545 | 0.1783 | 0.3921 | 0.0108  | 0.0106 | 0.3183 | 43.7098 | 0.1767 | 18.8638  |
| Stroke | MF0091 | Weighted median           | 37 | 0.0918  | 0.0817 | 0.2611 | 0.0108  | 0.0106 | 0.3183 | 43.7098 | 0.1767 | 18.8638  |
| Stroke | MF0091 | Inverse variance weighted | 37 | 0.0161  | 0.0583 | 0.7829 | 0.0108  | 0.0106 | 0.3183 | 43.7098 | 0.1767 | 18.8638  |
| Stroke | MF0091 | Simple mode               | 37 | 0.1770  | 0.1579 | 0.2697 | 0.0108  | 0.0106 | 0.3183 | 43.7098 | 0.1767 | 18.8638  |
| Stroke | MF0091 | Weighted mode             | 37 | 0.1395  | 0.1521 | 0.3649 | 0.0108  | 0.0106 | 0.3183 | 43.7098 | 0.1767 | 18.8638  |
| Stroke | MF0092 | MR Egger                  | 37 | -0.0669 | 0.1949 | 0.7334 | 0.0046  | 0.0116 | 0.6966 | 42.0188 | 0.1929 | 26.6007  |
| Stroke | MF0092 | Weighted median           | 37 | -0.0737 | 0.0847 | 0.3841 | 0.0046  | 0.0116 | 0.6966 | 42.0188 | 0.1929 | 26.6007  |
| Stroke | MF0092 | Inverse variance weighted | 37 | 0.0055  | 0.0629 | 0.9302 | 0.0046  | 0.0116 | 0.6966 | 42.0188 | 0.1929 | 26.6007  |
| Stroke | MF0092 | Simple mode               | 37 | -0.1000 | 0.1821 | 0.5863 | 0.0046  | 0.0116 | 0.6966 | 42.0188 | 0.1929 | 26.6007  |
| Stroke | MF0092 | Weighted mode             | 37 | -0.0723 | 0.1502 | 0.6331 | 0.0046  | 0.0116 | 0.6966 | 42.0188 | 0.1929 | 26.6007  |
| Stroke | MF0093 | MR Egger                  | 37 | -0.5391 | 0.6992 | 0.4458 | 0.0349  | 0.0417 | 0.4083 | 55.2522 | 0.0160 | 3.0970   |
| Stroke | MF0093 | Weighted median           | 37 | 0.0290  | 0.2655 | 0.9130 | 0.0349  | 0.0417 | 0.4083 | 55.2522 | 0.0160 | 3.0970   |
| Stroke | MF0093 | Inverse variance weighted | 37 | 0.0139  | 0.2275 | 0.9513 | 0.0349  | 0.0417 | 0.4083 | 55.2522 | 0.0160 | 3.0970   |

|        |                      |                           |    |         |        |        |         |        |        |         |        |           |
|--------|----------------------|---------------------------|----|---------|--------|--------|---------|--------|--------|---------|--------|-----------|
| Stroke | MF0093               | Simple mode               | 37 | 0.2014  | 0.5381 | 0.7104 | 0.0349  | 0.0417 | 0.4083 | 55.2522 | 0.0160 | 3.0970    |
| Stroke | MF0093               | Weighted mode             | 37 | 0.0719  | 0.4806 | 0.8818 | 0.0349  | 0.0417 | 0.4083 | 55.2522 | 0.0160 | 3.0970    |
| Stroke | MF0094               | MR Egger                  | 37 | 0.0537  | 0.2797 | 0.8490 | -0.0003 | 0.0167 | 0.9845 | 52.8371 | 0.0270 | 3.9737    |
| Stroke | MF0094               | Weighted median           | 37 | 0.1067  | 0.1128 | 0.3443 | -0.0003 | 0.0167 | 0.9845 | 52.8371 | 0.0270 | 3.9737    |
| Stroke | MF0094               | Inverse variance weighted | 37 | 0.0485  | 0.0901 | 0.5907 | -0.0003 | 0.0167 | 0.9845 | 52.8371 | 0.0270 | 3.9737    |
| Stroke | MF0094               | Simple mode               | 37 | 0.0543  | 0.2142 | 0.8012 | -0.0003 | 0.0167 | 0.9845 | 52.8371 | 0.0270 | 3.9737    |
| Stroke | MF0094               | Weighted mode             | 37 | 0.0026  | 0.1969 | 0.9896 | -0.0003 | 0.0167 | 0.9845 | 52.8371 | 0.0270 | 3.9737    |
| Stroke | MF0095               | MR Egger                  | 37 | -0.2431 | 0.2643 | 0.3640 | 0.0143  | 0.0158 | 0.3699 | 25.9412 | 0.8669 | 16.3060   |
| Stroke | MF0095               | Weighted median           | 37 | 0.0187  | 0.1216 | 0.8777 | 0.0143  | 0.0158 | 0.3699 | 25.9412 | 0.8669 | 16.3060   |
| Stroke | MF0095               | Inverse variance weighted | 37 | -0.0162 | 0.0864 | 0.8510 | 0.0143  | 0.0158 | 0.3699 | 25.9412 | 0.8669 | 16.3060   |
| Stroke | MF0095               | Simple mode               | 37 | 0.0831  | 0.2640 | 0.7547 | 0.0143  | 0.0158 | 0.3699 | 25.9412 | 0.8669 | 16.3060   |
| Stroke | MF0095               | Weighted mode             | 37 | 0.0768  | 0.2466 | 0.7573 | 0.0143  | 0.0158 | 0.3699 | 25.9412 | 0.8669 | 16.3060   |
| Stroke | MF0096               | MR Egger                  | 37 | -0.0391 | 0.0764 | 0.6120 | 0.0019  | 0.0046 | 0.6718 | 22.0083 | 0.9572 | 132.1475  |
| Stroke | MF0096               | Weighted median           | 37 | -0.0321 | 0.0360 | 0.3732 | 0.0019  | 0.0046 | 0.6718 | 22.0083 | 0.9572 | 132.1475  |
| Stroke | MF0096               | Inverse variance weighted | 37 | -0.0082 | 0.0250 | 0.7412 | 0.0019  | 0.0046 | 0.6718 | 22.0083 | 0.9572 | 132.1475  |
| Stroke | MF0096               | Simple mode               | 37 | -0.0603 | 0.0670 | 0.3736 | 0.0019  | 0.0046 | 0.6718 | 22.0083 | 0.9572 | 132.1475  |
| Stroke | MF0096               | Weighted mode             | 37 | -0.0470 | 0.0679 | 0.4934 | 0.0019  | 0.0046 | 0.6718 | 22.0083 | 0.9572 | 132.1475  |
| Stroke | MF0097               | MR Egger                  | 37 | -0.3509 | 0.2175 | 0.1156 | 0.0233  | 0.0130 | 0.0818 | 32.2805 | 0.6462 | 12.9072   |
| Stroke | MF0097               | Weighted median           | 37 | 0.0340  | 0.1045 | 0.7453 | 0.0233  | 0.0130 | 0.0818 | 32.2805 | 0.6462 | 12.9072   |
| Stroke | MF0097               | Inverse variance weighted | 37 | 0.0174  | 0.0711 | 0.8072 | 0.0233  | 0.0130 | 0.0818 | 32.2805 | 0.6462 | 12.9072   |
| Stroke | MF0097               | Simple mode               | 37 | 0.3716  | 0.2473 | 0.1417 | 0.0233  | 0.0130 | 0.0818 | 32.2805 | 0.6462 | 12.9072   |
| Stroke | MF0097               | Weighted mode             | 37 | 0.3994  | 0.2480 | 0.1161 | 0.0233  | 0.0130 | 0.0818 | 32.2805 | 0.6462 | 12.9072   |
| Stroke | MF0098               | MR Egger                  | 37 | 0.0373  | 0.0760 | 0.6266 | -0.0014 | 0.0045 | 0.7632 | 30.7344 | 0.6742 | 90.1617   |
| Stroke | MF0098               | Weighted median           | 37 | 0.0013  | 0.0337 | 0.9698 | -0.0014 | 0.0045 | 0.7632 | 30.7344 | 0.6742 | 90.1617   |
| Stroke | MF0098               | Inverse variance weighted | 37 | 0.0155  | 0.0248 | 0.5326 | -0.0014 | 0.0045 | 0.7632 | 30.7344 | 0.6742 | 90.1617   |
| Stroke | MF0098               | Simple mode               | 37 | -0.0185 | 0.0763 | 0.8093 | -0.0014 | 0.0045 | 0.7632 | 30.7344 | 0.6742 | 90.1617   |
| Stroke | MF0098               | Weighted mode             | 37 | -0.0341 | 0.0712 | 0.6348 | -0.0014 | 0.0045 | 0.7632 | 30.7344 | 0.6742 | 90.1617   |
| Stroke | MF0100               | MR Egger                  | 37 | 0.7674  | 0.8674 | 0.3824 | -0.0593 | 0.0517 | 0.2596 | 41.2222 | 0.2528 | -156.5953 |
| Stroke | MF0100               | Weighted median           | 37 | -0.0333 | 0.3974 | 0.9333 | -0.0593 | 0.0517 | 0.2596 | 41.2222 | 0.2528 | -156.5953 |
| Stroke | MF0100               | Inverse variance weighted | 37 | -0.1721 | 0.2846 | 0.5453 | -0.0593 | 0.0517 | 0.2596 | 41.2222 | 0.2528 | -156.5953 |
| Stroke | MF0100               | Simple mode               | 37 | -0.2724 | 0.7789 | 0.7286 | -0.0593 | 0.0517 | 0.2596 | 41.2222 | 0.2528 | -156.5953 |
| Stroke | MF0100               | Weighted mode             | 37 | -0.0641 | 0.6183 | 0.9181 | -0.0593 | 0.0517 | 0.2596 | 41.2222 | 0.2528 | -156.5953 |
| Stroke | MF0101               | MR Egger                  | 37 | -0.2389 | 0.2960 | 0.4250 | 0.0091  | 0.0177 | 0.6090 | 21.7706 | 0.9606 | 10.9567   |
| Stroke | MF0101               | Weighted median           | 37 | -0.0864 | 0.1381 | 0.5316 | 0.0091  | 0.0177 | 0.6090 | 21.7706 | 0.9606 | 10.9567   |
| Stroke | MF0101               | Inverse variance weighted | 37 | -0.0945 | 0.0967 | 0.3285 | 0.0091  | 0.0177 | 0.6090 | 21.7706 | 0.9606 | 10.9567   |
| Stroke | MF0101               | Simple mode               | 37 | 0.0409  | 0.2519 | 0.8718 | 0.0091  | 0.0177 | 0.6090 | 21.7706 | 0.9606 | 10.9567   |
| Stroke | MF0101               | Weighted mode             | 37 | 0.0202  | 0.2447 | 0.9346 | 0.0091  | 0.0177 | 0.6090 | 21.7706 | 0.9606 | 10.9567   |
| Stroke | MF0102               | MR Egger                  | 37 | 0.2303  | 0.2704 | 0.4003 | -0.0015 | 0.0161 | 0.9288 | 35.2821 | 0.4549 | 10.9731   |
| Stroke | MF0102               | Weighted median           | 37 | 0.2485  | 0.1268 | 0.0501 | -0.0015 | 0.0161 | 0.9288 | 35.2821 | 0.4549 | 10.9731   |
| Stroke | MF0102               | Inverse variance weighted | 37 | 0.2073  | 0.0880 | 0.0185 | -0.0015 | 0.0161 | 0.9288 | 35.2821 | 0.4549 | 10.9731   |
| Stroke | MF0102               | Simple mode               | 37 | 0.4422  | 0.3044 | 0.1550 | -0.0015 | 0.0161 | 0.9288 | 35.2821 | 0.4549 | 10.9731   |
| Stroke | MF0102               | Weighted mode             | 37 | 0.4560  | 0.2684 | 0.0979 | -0.0015 | 0.0161 | 0.9288 | 35.2821 | 0.4549 | 10.9731   |
| Stroke | MF0103               | MR Egger                  | 37 | -0.1586 | 0.1334 | 0.2425 | 0.0085  | 0.0080 | 0.2904 | 32.9801 | 0.6130 | 45.3118   |
| Stroke | MF0103               | Weighted median           | 37 | -0.1219 | 0.0645 | 0.0587 | 0.0085  | 0.0080 | 0.2904 | 32.9801 | 0.6130 | 45.3118   |
| Stroke | MF0103               | Inverse variance weighted | 37 | -0.0232 | 0.0436 | 0.5940 | 0.0085  | 0.0080 | 0.2904 | 32.9801 | 0.6130 | 45.3118   |
| Stroke | MF0103               | Simple mode               | 37 | -0.1427 | 0.1261 | 0.2653 | 0.0085  | 0.0080 | 0.2904 | 32.9801 | 0.6130 | 45.3118   |
| Stroke | MF0103               | Weighted mode             | 37 | -0.1427 | 0.1270 | 0.2687 | 0.0085  | 0.0080 | 0.2904 | 32.9801 | 0.6130 | 45.3118   |
| Stroke | c_Bacilli            | MR Egger                  | 37 | -0.1364 | 0.3123 | 0.6650 | 0.0062  | 0.0186 | 0.7431 | 30.4911 | 0.6856 | 1.7417    |
| Stroke | c_Bacilli            | Weighted median           | 37 | -0.0775 | 0.1486 | 0.6021 | 0.0062  | 0.0186 | 0.7431 | 30.4911 | 0.6856 | 1.7417    |
| Stroke | c_Bacilli            | Inverse variance weighted | 37 | -0.0389 | 0.1021 | 0.7033 | 0.0062  | 0.0186 | 0.7431 | 30.4911 | 0.6856 | 1.7417    |
| Stroke | c_Bacilli            | Simple mode               | 37 | -0.1264 | 0.2878 | 0.6630 | 0.0062  | 0.0186 | 0.7431 | 30.4911 | 0.6856 | 1.7417    |
| Stroke | c_Bacilli            | Weighted mode             | 37 | -0.0965 | 0.2641 | 0.7170 | 0.0062  | 0.0186 | 0.7431 | 30.4911 | 0.6856 | 1.7417    |
| Stroke | c_Betaproteobacteria | MR Egger                  | 37 | 0.1452  | 0.6293 | 0.8189 | -0.0130 | 0.0375 | 0.7307 | 39.8693 | 0.2624 | 3.1739    |
| Stroke | c_Betaproteobacteria | Weighted median           | 37 | -0.0069 | 0.2950 | 0.9813 | -0.0130 | 0.0375 | 0.7307 | 39.8693 | 0.2624 | 3.1739    |
| Stroke | c_Betaproteobacteria | Inverse variance weighted | 37 | -0.0611 | 0.2032 | 0.7635 | -0.0130 | 0.0375 | 0.7307 | 39.8693 | 0.2624 | 3.1739    |
| Stroke | c_Betaproteobacteria | Simple mode               | 37 | -0.2557 | 0.6245 | 0.6846 | -0.0130 | 0.0375 | 0.7307 | 39.8693 | 0.2624 | 3.1739    |
| Stroke | c_Betaproteobacteria | Weighted mode             | 37 | -0.2202 | 0.6932 | 0.7525 | -0.0130 | 0.0375 | 0.7307 | 39.8693 | 0.2624 | 3.1739    |
| Stroke | c_Negativicutes      | MR Egger                  | 37 | -0.0085 | 0.4769 | 0.9859 | -0.0035 | 0.0284 | 0.9018 | 31.9450 | 0.6164 | 1.7037    |
| Stroke | c_Negativicutes      | Weighted median           | 37 | -0.0701 | 0.2262 | 0.7568 | -0.0035 | 0.0284 | 0.9018 | 31.9450 | 0.6164 | 1.7037    |
| Stroke | c_Negativicutes      | Inverse variance weighted | 37 | -0.0645 | 0.1558 | 0.6788 | -0.0035 | 0.0284 | 0.9018 | 31.9450 | 0.6164 | 1.7037    |
| Stroke | c_Negativicutes      | Simple mode               | 37 | 0.0133  | 0.4675 | 0.9774 | -0.0035 | 0.0284 | 0.9018 | 31.9450 | 0.6164 | 1.7037    |

|        |                                          |                           |    |         |        |        |         |        |        |         |        |         |
|--------|------------------------------------------|---------------------------|----|---------|--------|--------|---------|--------|--------|---------|--------|---------|
| Stroke | c_Negativicutes                          | Weighted mode             | 37 | -0.1671 | 0.4216 | 0.6941 | -0.0035 | 0.0284 | 0.9018 | 31.9450 | 0.6164 | 1.7037  |
| Stroke | f_Acidaminococcaceae                     | MR Egger                  | 37 | 0.0563  | 0.5837 | 0.9237 | 0.0021  | 0.0348 | 0.9512 | 23.2568 | 0.9356 | 1.3097  |
| Stroke | f_Acidaminococcaceae                     | Weighted median           | 37 | 0.0140  | 0.2663 | 0.9580 | 0.0021  | 0.0348 | 0.9512 | 23.2568 | 0.9356 | 1.3097  |
| Stroke | f_Acidaminococcaceae                     | Inverse variance weighted | 37 | 0.0904  | 0.1907 | 0.6357 | 0.0021  | 0.0348 | 0.9512 | 23.2568 | 0.9356 | 1.3097  |
| Stroke | f_Acidaminococcaceae                     | Simple mode               | 37 | 0.0611  | 0.5072 | 0.9048 | 0.0021  | 0.0348 | 0.9512 | 23.2568 | 0.9356 | 1.3097  |
| Stroke | f_Acidaminococcaceae                     | Weighted mode             | 37 | 0.0174  | 0.4555 | 0.9697 | 0.0021  | 0.0348 | 0.9512 | 23.2568 | 0.9356 | 1.3097  |
| Stroke | f_Actinomycetaceae                       | MR Egger                  | 37 | 0.0021  | 0.2813 | 0.9941 | -0.0061 | 0.0168 | 0.7180 | 26.4778 | 0.8494 | 9.6816  |
| Stroke | f_Actinomycetaceae                       | Weighted median           | 37 | -0.0609 | 0.1290 | 0.6372 | -0.0061 | 0.0168 | 0.7180 | 26.4778 | 0.8494 | 9.6816  |
| Stroke | f_Actinomycetaceae                       | Inverse variance weighted | 37 | -0.0947 | 0.0919 | 0.3031 | -0.0061 | 0.0168 | 0.7180 | 26.4778 | 0.8494 | 9.6816  |
| Stroke | f_Actinomycetaceae                       | Simple mode               | 37 | -0.0944 | 0.2689 | 0.7275 | -0.0061 | 0.0168 | 0.7180 | 26.4778 | 0.8494 | 9.6816  |
| Stroke | f_Actinomycetaceae                       | Weighted mode             | 37 | -0.1018 | 0.2701 | 0.7083 | -0.0061 | 0.0168 | 0.7180 | 26.4778 | 0.8494 | 9.6816  |
| Stroke | f_Aerococcaceae                          | MR Egger                  | 37 | 0.7103  | 0.4465 | 0.1207 | -0.0276 | 0.0266 | 0.3078 | 21.5441 | 0.9729 | 3.4820  |
| Stroke | f_Aerococcaceae                          | Weighted median           | 37 | 0.3250  | 0.2095 | 0.1208 | -0.0276 | 0.0266 | 0.3078 | 21.5441 | 0.9729 | 3.4820  |
| Stroke | f_Aerococcaceae                          | Inverse variance weighted | 37 | 0.2735  | 0.1459 | 0.0609 | -0.0276 | 0.0266 | 0.3078 | 21.5441 | 0.9729 | 3.4820  |
| Stroke | f_Aerococcaceae                          | Simple mode               | 37 | 0.4402  | 0.4040 | 0.2832 | -0.0276 | 0.0266 | 0.3078 | 21.5441 | 0.9729 | 3.4820  |
| Stroke | f_Aerococcaceae                          | Weighted mode             | 37 | 0.3540  | 0.3621 | 0.3348 | -0.0276 | 0.0266 | 0.3078 | 21.5441 | 0.9729 | 3.4820  |
| Stroke | f_Bacillaceae                            | MR Egger                  | 37 | -0.4149 | 0.4083 | 0.3165 | 0.0278  | 0.0244 | 0.2613 | 39.4501 | 0.3183 | 2.1110  |
| Stroke | f_Bacillaceae                            | Weighted median           | 37 | 0.0120  | 0.1906 | 0.9497 | 0.0278  | 0.0244 | 0.2613 | 39.4501 | 0.3183 | 2.1110  |
| Stroke | f_Bacillaceae                            | Inverse variance weighted | 37 | 0.0257  | 0.1340 | 0.8480 | 0.0278  | 0.0244 | 0.2613 | 39.4501 | 0.3183 | 2.1110  |
| Stroke | f_Bacillaceae                            | Simple mode               | 37 | 0.1508  | 0.3903 | 0.7016 | 0.0278  | 0.0244 | 0.2613 | 39.4501 | 0.3183 | 2.1110  |
| Stroke | f_Bacillaceae                            | Weighted mode             | 37 | 0.0573  | 0.3022 | 0.8507 | 0.0278  | 0.0244 | 0.2613 | 39.4501 | 0.3183 | 2.1110  |
| Stroke | f_Bifidobacteriaceae                     | MR Egger                  | 37 | -0.8160 | 0.5929 | 0.1775 | 0.0491  | 0.0354 | 0.1743 | 42.6057 | 0.2081 | 2.3329  |
| Stroke | f_Bifidobacteriaceae                     | Weighted median           | 37 | 0.0303  | 0.2774 | 0.9130 | 0.0491  | 0.0354 | 0.1743 | 42.6057 | 0.2081 | 2.3329  |
| Stroke | f_Bifidobacteriaceae                     | Inverse variance weighted | 37 | -0.0389 | 0.1962 | 0.8429 | 0.0491  | 0.0354 | 0.1743 | 42.6057 | 0.2081 | 2.3329  |
| Stroke | f_Bifidobacteriaceae                     | Simple mode               | 37 | 0.6737  | 0.6266 | 0.2895 | 0.0491  | 0.0354 | 0.1743 | 42.6057 | 0.2081 | 2.3329  |
| Stroke | f_Bifidobacteriaceae                     | Weighted mode             | 37 | 0.6028  | 0.5144 | 0.2490 | 0.0491  | 0.0354 | 0.1743 | 42.6057 | 0.2081 | 2.3329  |
| Stroke | f_Burkholderiaceae                       | MR Egger                  | 37 | -0.0518 | 0.6830 | 0.9400 | 0.0145  | 0.0407 | 0.7238 | 48.1355 | 0.0687 | 13.6028 |
| Stroke | f_Burkholderiaceae                       | Weighted median           | 37 | 0.3579  | 0.2756 | 0.1941 | 0.0145  | 0.0407 | 0.7238 | 48.1355 | 0.0687 | 13.6028 |
| Stroke | f_Burkholderiaceae                       | Inverse variance weighted | 37 | 0.1782  | 0.2205 | 0.4191 | 0.0145  | 0.0407 | 0.7238 | 48.1355 | 0.0687 | 13.6028 |
| Stroke | f_Burkholderiaceae                       | Simple mode               | 37 | 0.4427  | 0.5736 | 0.4453 | 0.0145  | 0.0407 | 0.7238 | 48.1355 | 0.0687 | 13.6028 |
| Stroke | f_Burkholderiaceae                       | Weighted mode             | 37 | 0.5202  | 0.5506 | 0.3511 | 0.0145  | 0.0407 | 0.7238 | 48.1355 | 0.0687 | 13.6028 |
| Stroke | f_Clostridiales_Family_XI_Incertae_Sedis | MR Egger                  | 37 | 0.0868  | 0.5593 | 0.8775 | -0.0089 | 0.0334 | 0.7905 | 44.2308 | 0.1363 | 13.7421 |
| Stroke | f_Clostridiales_Family_XI_Incertae_Sedis | Weighted median           | 37 | -0.0893 | 0.2424 | 0.7125 | -0.0089 | 0.0334 | 0.7905 | 44.2308 | 0.1363 | 13.7421 |
| Stroke | f_Clostridiales_Family_XI_Incertae_Sedis | Inverse variance weighted | 37 | -0.0547 | 0.1804 | 0.7618 | -0.0089 | 0.0334 | 0.7905 | 44.2308 | 0.1363 | 13.7421 |
| Stroke | f_Clostridiales_Family_XI_Incertae_Sedis | Simple mode               | 37 | -0.0553 | 0.5308 | 0.9176 | -0.0089 | 0.0334 | 0.7905 | 44.2308 | 0.1363 | 13.7421 |
| Stroke | f_Clostridiales_Family_XI_Incertae_Sedis | Weighted mode             | 37 | -0.0357 | 0.4556 | 0.9380 | -0.0089 | 0.0334 | 0.7905 | 44.2308 | 0.1363 | 13.7421 |
| Stroke | f_Coriobacteriaceae                      | MR Egger                  | 37 | -0.5015 | 0.4424 | 0.2647 | 0.0394  | 0.0264 | 0.1447 | 27.6037 | 0.8410 | 4.0795  |
| Stroke | f_Coriobacteriaceae                      | Weighted median           | 37 | -0.0398 | 0.2076 | 0.8480 | 0.0394  | 0.0264 | 0.1447 | 27.6037 | 0.8410 | 4.0795  |
| Stroke | f_Coriobacteriaceae                      | Inverse variance weighted | 37 | 0.1223  | 0.1446 | 0.3975 | 0.0394  | 0.0264 | 0.1447 | 27.6037 | 0.8410 | 4.0795  |
| Stroke | f_Coriobacteriaceae                      | Simple mode               | 37 | -0.1209 | 0.4038 | 0.7663 | 0.0394  | 0.0264 | 0.1447 | 27.6037 | 0.8410 | 4.0795  |
| Stroke | f_Coriobacteriaceae                      | Weighted mode             | 37 | -0.1427 | 0.3751 | 0.7058 | 0.0394  | 0.0264 | 0.1447 | 27.6037 | 0.8410 | 4.0795  |
| Stroke | f_Enterobacteriaceae                     | MR Egger                  | 37 | -0.6823 | 0.7415 | 0.3638 | 0.0474  | 0.0442 | 0.2911 | 56.3939 | 0.0164 | 4.7513  |
| Stroke | f_Enterobacteriaceae                     | Weighted median           | 37 | 0.2388  | 0.2927 | 0.4147 | 0.0474  | 0.0442 | 0.2911 | 56.3939 | 0.0164 | 4.7513  |
| Stroke | f_Enterobacteriaceae                     | Inverse variance weighted | 37 | 0.0689  | 0.2428 | 0.7766 | 0.0474  | 0.0442 | 0.2911 | 56.3939 | 0.0164 | 4.7513  |
| Stroke | f_Enterobacteriaceae                     | Simple mode               | 37 | 0.3467  | 0.5798 | 0.5536 | 0.0474  | 0.0442 | 0.2911 | 56.3939 | 0.0164 | 4.7513  |
| Stroke | f_Enterobacteriaceae                     | Weighted mode             | 37 | 0.2761  | 0.5431 | 0.6143 | 0.0474  | 0.0442 | 0.2911 | 56.3939 | 0.0164 | 4.7513  |
| Stroke | f_Eubacteriaceae                         | MR Egger                  | 37 | 0.0875  | 0.3977 | 0.8270 | 0.0073  | 0.0237 | 0.7593 | 29.1669 | 0.7451 | 8.2535  |
| Stroke | f_Eubacteriaceae                         | Weighted median           | 37 | 0.1213  | 0.2004 | 0.5448 | 0.0073  | 0.0237 | 0.7593 | 29.1669 | 0.7451 | 8.2535  |
| Stroke | f_Eubacteriaceae                         | Inverse variance weighted | 37 | 0.2036  | 0.1299 | 0.1171 | 0.0073  | 0.0237 | 0.7593 | 29.1669 | 0.7451 | 8.2535  |
| Stroke | f_Eubacteriaceae                         | Simple mode               | 37 | 0.1366  | 0.3936 | 0.7306 | 0.0073  | 0.0237 | 0.7593 | 29.1669 | 0.7451 | 8.2535  |
| Stroke | f_Eubacteriaceae                         | Weighted mode             | 37 | 0.1261  | 0.3449 | 0.7168 | 0.0073  | 0.0237 | 0.7593 | 29.1669 | 0.7451 | 8.2535  |
| Stroke | f_Lachnospiraceae                        | MR Egger                  | 37 | 0.2489  | 0.2524 | 0.3308 | -0.0069 | 0.0151 | 0.6500 | 25.4840 | 0.8808 | 8.3487  |
| Stroke | f_Lachnospiraceae                        | Weighted median           | 37 | 0.1505  | 0.1164 | 0.1961 | -0.0069 | 0.0151 | 0.6500 | 25.4840 | 0.8808 | 8.3487  |
| Stroke | f_Lachnospiraceae                        | Inverse variance weighted | 37 | 0.1398  | 0.0825 | 0.0902 | -0.0069 | 0.0151 | 0.6500 | 25.4840 | 0.8808 | 8.3487  |
| Stroke | f_Lachnospiraceae                        | Simple mode               | 37 | 0.1889  | 0.2276 | 0.4122 | -0.0069 | 0.0151 | 0.6500 | 25.4840 | 0.8808 | 8.3487  |
| Stroke | f_Lachnospiraceae                        | Weighted mode             | 37 | 0.1656  | 0.2229 | 0.4624 | -0.0069 | 0.0151 | 0.6500 | 25.4840 | 0.8808 | 8.3487  |
| Stroke | f_Lactobacillaceae                       | MR Egger                  | 37 | -0.6988 | 0.4579 | 0.1360 | 0.0399  | 0.0273 | 0.1529 | 32.6030 | 0.6309 | 2.1329  |
| Stroke | f_Lactobacillaceae                       | Weighted median           | 37 | -0.1785 | 0.2199 | 0.4170 | 0.0399  | 0.0273 | 0.1529 | 32.6030 | 0.6309 | 2.1329  |
| Stroke | f_Lactobacillaceae                       | Inverse variance weighted | 37 | -0.0665 | 0.1497 | 0.6569 | 0.0399  | 0.0273 | 0.1529 | 32.6030 | 0.6309 | 2.1329  |
| Stroke | f_Lactobacillaceae                       | Simple mode               | 37 | -0.0971 | 0.4536 | 0.8317 | 0.0399  | 0.0273 | 0.1529 | 32.6030 | 0.6309 | 2.1329  |
| Stroke | f_Lactobacillaceae                       | Weighted mode             | 37 | -0.3567 | 0.3646 | 0.3344 | 0.0399  | 0.0273 | 0.1529 | 32.6030 | 0.6309 | 2.1329  |

|        |                         |                           |    |         |        |        |         |        |        |         |        |         |
|--------|-------------------------|---------------------------|----|---------|--------|--------|---------|--------|--------|---------|--------|---------|
| Stroke | f_Leuconostocaceae      | MR Egger                  | 37 | -0.4060 | 0.7101 | 0.5711 | 0.0376  | 0.0424 | 0.3814 | 39.4317 | 0.2783 | 7.1917  |
| Stroke | f_Leuconostocaceae      | Weighted median           | 37 | -0.0643 | 0.3386 | 0.8494 | 0.0376  | 0.0424 | 0.3814 | 39.4317 | 0.2783 | 7.1917  |
| Stroke | f_Leuconostocaceae      | Inverse variance weighted | 37 | 0.1888  | 0.2314 | 0.4145 | 0.0376  | 0.0424 | 0.3814 | 39.4317 | 0.2783 | 7.1917  |
| Stroke | f_Leuconostocaceae      | Simple mode               | 37 | -0.2865 | 0.8333 | 0.7330 | 0.0376  | 0.0424 | 0.3814 | 39.4317 | 0.2783 | 7.1917  |
| Stroke | f_Leuconostocaceae      | Weighted mode             | 37 | -0.4481 | 0.8336 | 0.5942 | 0.0376  | 0.0424 | 0.3814 | 39.4317 | 0.2783 | 7.1917  |
| Stroke | f_Neisseriaceae         | MR Egger                  | 37 | -0.6432 | 0.6441 | 0.3249 | 0.0220  | 0.0384 | 0.5706 | 29.2392 | 0.7420 | 8.0886  |
| Stroke | f_Neisseriaceae         | Weighted median           | 37 | -0.4582 | 0.3089 | 0.1380 | 0.0220  | 0.0384 | 0.5706 | 29.2392 | 0.7420 | 8.0886  |
| Stroke | f_Neisseriaceae         | Inverse variance weighted | 37 | -0.2946 | 0.2105 | 0.1617 | 0.0220  | 0.0384 | 0.5706 | 29.2392 | 0.7420 | 8.0886  |
| Stroke | f_Neisseriaceae         | Simple mode               | 37 | -0.3856 | 0.6079 | 0.5298 | 0.0220  | 0.0384 | 0.5706 | 29.2392 | 0.7420 | 8.0886  |
| Stroke | f_Neisseriaceae         | Weighted mode             | 37 | -0.4729 | 0.5070 | 0.3572 | 0.0220  | 0.0384 | 0.5706 | 29.2392 | 0.7420 | 8.0886  |
| Stroke | f_Peptostreptococcaceae | MR Egger                  | 37 | 0.7614  | 0.5223 | 0.1538 | -0.0352 | 0.0312 | 0.2666 | 44.0796 | 0.1669 | 14.2965 |
| Stroke | f_Peptostreptococcaceae | Weighted median           | 37 | 0.0134  | 0.2334 | 0.9541 | -0.0352 | 0.0312 | 0.2666 | 44.0796 | 0.1669 | 14.2965 |
| Stroke | f_Peptostreptococcaceae | Inverse variance weighted | 37 | 0.2041  | 0.1714 | 0.2335 | -0.0352 | 0.0312 | 0.2666 | 44.0796 | 0.1669 | 14.2965 |
| Stroke | f_Peptostreptococcaceae | Simple mode               | 37 | -0.1046 | 0.5245 | 0.8430 | -0.0352 | 0.0312 | 0.2666 | 44.0796 | 0.1669 | 14.2965 |
| Stroke | f_Peptostreptococcaceae | Weighted mode             | 37 | -0.2808 | 0.5483 | 0.6117 | -0.0352 | 0.0312 | 0.2666 | 44.0796 | 0.1669 | 14.2965 |
| Stroke | f_Porphyromonadaceae    | MR Egger                  | 37 | 0.3461  | 0.2704 | 0.2091 | -0.0271 | 0.0161 | 0.1022 | 25.9250 | 0.8925 | 16.1971 |
| Stroke | f_Porphyromonadaceae    | Weighted median           | 37 | 0.0639  | 0.1241 | 0.6066 | -0.0271 | 0.0161 | 0.1022 | 25.9250 | 0.8925 | 16.1971 |
| Stroke | f_Porphyromonadaceae    | Inverse variance weighted | 37 | -0.0829 | 0.0884 | 0.3484 | -0.0271 | 0.0161 | 0.1022 | 25.9250 | 0.8925 | 16.1971 |
| Stroke | f_Porphyromonadaceae    | Simple mode               | 37 | 0.1124  | 0.2465 | 0.6513 | -0.0271 | 0.0161 | 0.1022 | 25.9250 | 0.8925 | 16.1971 |
| Stroke | f_Porphyromonadaceae    | Weighted mode             | 37 | 0.1124  | 0.2194 | 0.6117 | -0.0271 | 0.0161 | 0.1022 | 25.9250 | 0.8925 | 16.1971 |
| Stroke | f_Prevotellaceae        | MR Egger                  | 37 | 0.1883  | 0.8471 | 0.8254 | -0.0142 | 0.0505 | 0.7800 | 33.5473 | 0.5382 | 2.8115  |
| Stroke | f_Prevotellaceae        | Weighted median           | 37 | 0.1292  | 0.4163 | 0.7563 | -0.0142 | 0.0505 | 0.7800 | 33.5473 | 0.5382 | 2.8115  |
| Stroke | f_Prevotellaceae        | Inverse variance weighted | 37 | -0.0371 | 0.2768 | 0.8934 | -0.0142 | 0.0505 | 0.7800 | 33.5473 | 0.5382 | 2.8115  |
| Stroke | f_Prevotellaceae        | Simple mode               | 37 | 0.2308  | 0.8150 | 0.7786 | -0.0142 | 0.0505 | 0.7800 | 33.5473 | 0.5382 | 2.8115  |
| Stroke | f_Prevotellaceae        | Weighted mode             | 37 | 0.2745  | 0.7785 | 0.7265 | -0.0142 | 0.0505 | 0.7800 | 33.5473 | 0.5382 | 2.8115  |
| Stroke | f_Staphylococcaceae     | MR Egger                  | 37 | -0.1579 | 0.6016 | 0.7946 | 0.0226  | 0.0359 | 0.5338 | 50.2118 | 0.0461 | 1.9926  |
| Stroke | f_Staphylococcaceae     | Weighted median           | 37 | 0.1592  | 0.2431 | 0.5126 | 0.0226  | 0.0359 | 0.5338 | 50.2118 | 0.0461 | 1.9926  |
| Stroke | f_Staphylococcaceae     | Inverse variance weighted | 37 | 0.1994  | 0.1949 | 0.3062 | 0.0226  | 0.0359 | 0.5338 | 50.2118 | 0.0461 | 1.9926  |
| Stroke | f_Staphylococcaceae     | Simple mode               | 37 | -0.5258 | 0.5268 | 0.3249 | 0.0226  | 0.0359 | 0.5338 | 50.2118 | 0.0461 | 1.9926  |
| Stroke | f_Staphylococcaceae     | Weighted mode             | 37 | 0.3359  | 0.4083 | 0.4161 | 0.0226  | 0.0359 | 0.5338 | 50.2118 | 0.0461 | 1.9926  |
| Stroke | f_Streptococcaceae      | MR Egger                  | 37 | -0.2951 | 0.3860 | 0.4497 | 0.0112  | 0.0230 | 0.6308 | 27.1992 | 0.8241 | 1.0580  |
| Stroke | f_Streptococcaceae      | Weighted median           | 37 | -0.0531 | 0.1784 | 0.7659 | 0.0112  | 0.0230 | 0.6308 | 27.1992 | 0.8241 | 1.0580  |
| Stroke | f_Streptococcaceae      | Inverse variance weighted | 37 | -0.1183 | 0.1262 | 0.3487 | 0.0112  | 0.0230 | 0.6308 | 27.1992 | 0.8241 | 1.0580  |
| Stroke | f_Streptococcaceae      | Simple mode               | 37 | 0.0829  | 0.3525 | 0.8153 | 0.0112  | 0.0230 | 0.6308 | 27.1992 | 0.8241 | 1.0580  |
| Stroke | f_Streptococcaceae      | Weighted mode             | 37 | 0.0375  | 0.3287 | 0.9098 | 0.0112  | 0.0230 | 0.6308 | 27.1992 | 0.8241 | 1.0580  |
| Stroke | f_Sutterellaceae        | MR Egger                  | 37 | 0.0052  | 0.8148 | 0.9949 | -0.0078 | 0.0486 | 0.8735 | 41.7892 | 0.1997 | 14.2782 |
| Stroke | f_Sutterellaceae        | Weighted median           | 37 | -0.1916 | 0.3569 | 0.5914 | -0.0078 | 0.0486 | 0.8735 | 41.7892 | 0.1997 | 14.2782 |
| Stroke | f_Sutterellaceae        | Inverse variance weighted | 37 | -0.1182 | 0.2627 | 0.6526 | -0.0078 | 0.0486 | 0.8735 | 41.7892 | 0.1997 | 14.2782 |
| Stroke | f_Sutterellaceae        | Simple mode               | 37 | -0.1149 | 0.8081 | 0.8877 | -0.0078 | 0.0486 | 0.8735 | 41.7892 | 0.1997 | 14.2782 |
| Stroke | f_Sutterellaceae        | Weighted mode             | 37 | -0.1718 | 0.7556 | 0.8215 | -0.0078 | 0.0486 | 0.8735 | 41.7892 | 0.1997 | 14.2782 |
| Stroke | f_Veillonellaceae       | MR Egger                  | 37 | 0.0309  | 0.5357 | 0.9544 | -0.0064 | 0.0320 | 0.8421 | 34.4342 | 0.4953 | 4.0586  |
| Stroke | f_Veillonellaceae       | Weighted median           | 37 | -0.0860 | 0.2588 | 0.7397 | -0.0064 | 0.0320 | 0.8421 | 34.4342 | 0.4953 | 4.0586  |
| Stroke | f_Veillonellaceae       | Inverse variance weighted | 37 | -0.0707 | 0.1750 | 0.6862 | -0.0064 | 0.0320 | 0.8421 | 34.4342 | 0.4953 | 4.0586  |
| Stroke | f_Veillonellaceae       | Simple mode               | 37 | -0.3912 | 0.5015 | 0.4404 | -0.0064 | 0.0320 | 0.8421 | 34.4342 | 0.4953 | 4.0586  |
| Stroke | f_Veillonellaceae       | Weighted mode             | 37 | -0.3307 | 0.4407 | 0.4579 | -0.0064 | 0.0320 | 0.8421 | 34.4342 | 0.4953 | 4.0586  |
| Stroke | g_Abiotrophia           | MR Egger                  | 37 | 0.5909  | 0.5072 | 0.2519 | -0.0206 | 0.0303 | 0.5002 | 22.4838 | 0.9497 | 2.3609  |
| Stroke | g_Abiotrophia           | Weighted median           | 37 | 0.3328  | 0.2333 | 0.1537 | -0.0206 | 0.0303 | 0.5002 | 22.4838 | 0.9497 | 2.3609  |
| Stroke | g_Abiotrophia           | Inverse variance weighted | 37 | 0.2643  | 0.1657 | 0.1107 | -0.0206 | 0.0303 | 0.5002 | 22.4838 | 0.9497 | 2.3609  |
| Stroke | g_Abiotrophia           | Simple mode               | 37 | 0.4606  | 0.4655 | 0.3291 | -0.0206 | 0.0303 | 0.5002 | 22.4838 | 0.9497 | 2.3609  |
| Stroke | g_Abiotrophia           | Weighted mode             | 37 | 0.3858  | 0.4312 | 0.3769 | -0.0206 | 0.0303 | 0.5002 | 22.4838 | 0.9497 | 2.3609  |
| Stroke | g_Acidaminococcus       | MR Egger                  | 37 | 0.7460  | 0.5950 | 0.2182 | -0.0371 | 0.0355 | 0.3032 | 31.2996 | 0.6916 | 1.1452  |
| Stroke | g_Acidaminococcus       | Weighted median           | 37 | 0.3263  | 0.2856 | 0.2532 | -0.0371 | 0.0355 | 0.3032 | 31.2996 | 0.6916 | 1.1452  |
| Stroke | g_Acidaminococcus       | Inverse variance weighted | 37 | 0.1584  | 0.1944 | 0.4153 | -0.0371 | 0.0355 | 0.3032 | 31.2996 | 0.6916 | 1.1452  |
| Stroke | g_Acidaminococcus       | Simple mode               | 37 | 0.4469  | 0.5964 | 0.4586 | -0.0371 | 0.0355 | 0.3032 | 31.2996 | 0.6916 | 1.1452  |
| Stroke | g_Acidaminococcus       | Weighted mode             | 37 | 0.5285  | 0.5369 | 0.3316 | -0.0371 | 0.0355 | 0.3032 | 31.2996 | 0.6916 | 1.1452  |
| Stroke | g_Actinomyces           | MR Egger                  | 37 | -0.4075 | 0.4528 | 0.3743 | 0.0234  | 0.0270 | 0.3920 | 43.8754 | 0.1444 | 1.2366  |
| Stroke | g_Actinomyces           | Weighted median           | 37 | -0.0915 | 0.1930 | 0.6354 | 0.0234  | 0.0270 | 0.3920 | 43.8754 | 0.1444 | 1.2366  |
| Stroke | g_Actinomyces           | Inverse variance weighted | 37 | -0.0366 | 0.1475 | 0.8043 | 0.0234  | 0.0270 | 0.3920 | 43.8754 | 0.1444 | 1.2366  |
| Stroke | g_Actinomyces           | Simple mode               | 37 | -0.0699 | 0.4452 | 0.8761 | 0.0234  | 0.0270 | 0.3920 | 43.8754 | 0.1444 | 1.2366  |
| Stroke | g_Actinomyces           | Weighted mode             | 37 | -0.1165 | 0.4443 | 0.7947 | 0.0234  | 0.0270 | 0.3920 | 43.8754 | 0.1444 | 1.2366  |
| Stroke | g_Aggregatibacter       | MR Egger                  | 37 | -0.3595 | 0.7150 | 0.6182 | 0.0174  | 0.0427 | 0.6863 | 31.9829 | 0.6145 | 87.8088 |

|        |                   |                           |    |         |        |        |         |        |        |         |        |         |
|--------|-------------------|---------------------------|----|---------|--------|--------|---------|--------|--------|---------|--------|---------|
| Stroke | g_Aggregatibacter | Weighted median           | 37 | -0.2927 | 0.3341 | 0.3809 | 0.0174  | 0.0427 | 0.6863 | 31.9829 | 0.6145 | 87.8088 |
| Stroke | g_Aggregatibacter | Inverse variance weighted | 37 | -0.0844 | 0.2336 | 0.7180 | 0.0174  | 0.0427 | 0.6863 | 31.9829 | 0.6145 | 87.8088 |
| Stroke | g_Aggregatibacter | Simple mode               | 37 | -0.4486 | 0.6772 | 0.5119 | 0.0174  | 0.0427 | 0.6863 | 31.9829 | 0.6145 | 87.8088 |
| Stroke | g_Aggregatibacter | Weighted mode             | 37 | -0.4052 | 0.5685 | 0.4805 | 0.0174  | 0.0427 | 0.6863 | 31.9829 | 0.6145 | 87.8088 |
| Stroke | g_Alistipes       | MR Egger                  | 37 | 0.3463  | 0.6127 | 0.5755 | -0.0060 | 0.0366 | 0.8710 | 41.9635 | 0.1945 | 1.1287  |
| Stroke | g_Alistipes       | Weighted median           | 37 | 0.3950  | 0.2722 | 0.1467 | -0.0060 | 0.0366 | 0.8710 | 41.9635 | 0.1945 | 1.1287  |
| Stroke | g_Alistipes       | Inverse variance weighted | 37 | 0.2516  | 0.1975 | 0.2027 | -0.0060 | 0.0366 | 0.8710 | 41.9635 | 0.1945 | 1.1287  |
| Stroke | g_Alistipes       | Simple mode               | 37 | 0.4333  | 0.5380 | 0.4259 | -0.0060 | 0.0366 | 0.8710 | 41.9635 | 0.1945 | 1.1287  |
| Stroke | g_Alistipes       | Weighted mode             | 37 | 0.4672  | 0.5289 | 0.3828 | -0.0060 | 0.0366 | 0.8710 | 41.9635 | 0.1945 | 1.1287  |
| Stroke | g_Anaerococcus    | MR Egger                  | 37 | -0.2026 | 0.6172 | 0.7446 | 0.0161  | 0.0368 | 0.6648 | 37.4050 | 0.3592 | 33.9804 |
| Stroke | g_Anaerococcus    | Weighted median           | 37 | 0.1250  | 0.2800 | 0.6553 | 0.0161  | 0.0368 | 0.6648 | 37.4050 | 0.3592 | 33.9804 |
| Stroke | g_Anaerococcus    | Inverse variance weighted | 37 | 0.0523  | 0.1994 | 0.7931 | 0.0161  | 0.0368 | 0.6648 | 37.4050 | 0.3592 | 33.9804 |
| Stroke | g_Anaerococcus    | Simple mode               | 37 | 0.3696  | 0.5897 | 0.5347 | 0.0161  | 0.0368 | 0.6648 | 37.4050 | 0.3592 | 33.9804 |
| Stroke | g_Anaerococcus    | Weighted mode             | 37 | -0.2147 | 0.5366 | 0.6915 | 0.0161  | 0.0368 | 0.6648 | 37.4050 | 0.3592 | 33.9804 |
| Stroke | g_Anaerofustis    | MR Egger                  | 37 | -0.0478 | 0.3603 | 0.8953 | -0.0031 | 0.0215 | 0.8877 | 34.8265 | 0.4765 | 3.7996  |
| Stroke | g_Anaerofustis    | Weighted median           | 37 | -0.1081 | 0.1714 | 0.5285 | -0.0031 | 0.0215 | 0.8877 | 34.8265 | 0.4765 | 3.7996  |
| Stroke | g_Anaerofustis    | Inverse variance weighted | 37 | -0.0962 | 0.1178 | 0.4141 | -0.0031 | 0.0215 | 0.8877 | 34.8265 | 0.4765 | 3.7996  |
| Stroke | g_Anaerofustis    | Simple mode               | 37 | -0.3901 | 0.3545 | 0.2784 | -0.0031 | 0.0215 | 0.8877 | 34.8265 | 0.4765 | 3.7996  |
| Stroke | g_Anaerofustis    | Weighted mode             | 37 | -0.1464 | 0.3502 | 0.6783 | -0.0031 | 0.0215 | 0.8877 | 34.8265 | 0.4765 | 3.7996  |
| Stroke | g_Anaerostipes    | MR Egger                  | 37 | -0.1248 | 0.3391 | 0.7152 | 0.0083  | 0.0202 | 0.6841 | 37.9746 | 0.3354 | 6.7759  |
| Stroke | g_Anaerostipes    | Weighted median           | 37 | 0.0392  | 0.1525 | 0.7971 | 0.0083  | 0.0202 | 0.6841 | 37.9746 | 0.3354 | 6.7759  |
| Stroke | g_Anaerostipes    | Inverse variance weighted | 37 | 0.0067  | 0.1096 | 0.9511 | 0.0083  | 0.0202 | 0.6841 | 37.9746 | 0.3354 | 6.7759  |
| Stroke | g_Anaerostipes    | Simple mode               | 37 | 0.4818  | 0.3285 | 0.1512 | 0.0083  | 0.0202 | 0.6841 | 37.9746 | 0.3354 | 6.7759  |
| Stroke | g_Anaerostipes    | Weighted mode             | 37 | 0.2973  | 0.3061 | 0.3379 | 0.0083  | 0.0202 | 0.6841 | 37.9746 | 0.3354 | 6.7759  |
| Stroke | g_Anaerotruncus   | MR Egger                  | 37 | 0.1621  | 0.2873 | 0.5762 | -0.0054 | 0.0171 | 0.7535 | 30.5724 | 0.6818 | 6.9043  |
| Stroke | g_Anaerotruncus   | Weighted median           | 37 | 0.0522  | 0.1325 | 0.6933 | -0.0054 | 0.0171 | 0.7535 | 30.5724 | 0.6818 | 6.9043  |
| Stroke | g_Anaerotruncus   | Inverse variance weighted | 37 | 0.0761  | 0.0939 | 0.4173 | -0.0054 | 0.0171 | 0.7535 | 30.5724 | 0.6818 | 6.9043  |
| Stroke | g_Anaerotruncus   | Simple mode               | 37 | 0.3336  | 0.2391 | 0.1715 | -0.0054 | 0.0171 | 0.7535 | 30.5724 | 0.6818 | 6.9043  |
| Stroke | g_Anaerotruncus   | Weighted mode             | 37 | 0.2687  | 0.2521 | 0.2936 | -0.0054 | 0.0171 | 0.7535 | 30.5724 | 0.6818 | 6.9043  |
| Stroke | g_Atopobium       | MR Egger                  | 37 | 0.1506  | 0.3422 | 0.6627 | -0.0124 | 0.0204 | 0.5486 | 27.7378 | 0.8038 | 3.8109  |
| Stroke | g_Atopobium       | Weighted median           | 37 | -0.0558 | 0.1640 | 0.7338 | -0.0124 | 0.0204 | 0.5486 | 27.7378 | 0.8038 | 3.8109  |
| Stroke | g_Atopobium       | Inverse variance weighted | 37 | -0.0454 | 0.1118 | 0.6851 | -0.0124 | 0.0204 | 0.5486 | 27.7378 | 0.8038 | 3.8109  |
| Stroke | g_Atopobium       | Simple mode               | 37 | -0.0590 | 0.3403 | 0.8633 | -0.0124 | 0.0204 | 0.5486 | 27.7378 | 0.8038 | 3.8109  |
| Stroke | g_Atopobium       | Weighted mode             | 37 | -0.1476 | 0.2827 | 0.6047 | -0.0124 | 0.0204 | 0.5486 | 27.7378 | 0.8038 | 3.8109  |
| Stroke | g_Bacteroides     | MR Egger                  | 37 | -0.3162 | 0.2902 | 0.2834 | 0.0182  | 0.0173 | 0.2995 | 26.6712 | 0.8711 | 10.1598 |
| Stroke | g_Bacteroides     | Weighted median           | 37 | -0.0266 | 0.1392 | 0.8484 | 0.0182  | 0.0173 | 0.2995 | 26.6712 | 0.8711 | 10.1598 |
| Stroke | g_Bacteroides     | Inverse variance weighted | 37 | -0.0273 | 0.0949 | 0.7735 | 0.0182  | 0.0173 | 0.2995 | 26.6712 | 0.8711 | 10.1598 |
| Stroke | g_Bacteroides     | Simple mode               | 37 | -0.0560 | 0.2862 | 0.8459 | 0.0182  | 0.0173 | 0.2995 | 26.6712 | 0.8711 | 10.1598 |
| Stroke | g_Bacteroides     | Weighted mode             | 37 | -0.0127 | 0.2616 | 0.9614 | 0.0182  | 0.0173 | 0.2995 | 26.6712 | 0.8711 | 10.1598 |
| Stroke | g_Blautia         | MR Egger                  | 37 | 0.0188  | 0.2539 | 0.9414 | 0.0033  | 0.0152 | 0.8278 | 26.7380 | 0.8405 | 9.7500  |
| Stroke | g_Blautia         | Weighted median           | 37 | 0.1972  | 0.1140 | 0.0838 | 0.0033  | 0.0152 | 0.8278 | 26.7380 | 0.8405 | 9.7500  |
| Stroke | g_Blautia         | Inverse variance weighted | 37 | 0.0714  | 0.0830 | 0.3897 | 0.0033  | 0.0152 | 0.8278 | 26.7380 | 0.8405 | 9.7500  |
| Stroke | g_Blautia         | Simple mode               | 37 | 0.3480  | 0.2421 | 0.1593 | 0.0033  | 0.0152 | 0.8278 | 26.7380 | 0.8405 | 9.7500  |
| Stroke | g_Blautia         | Weighted mode             | 37 | 0.3599  | 0.2771 | 0.2022 | 0.0033  | 0.0152 | 0.8278 | 26.7380 | 0.8405 | 9.7500  |
| Stroke | g_Citrobacter     | MR Egger                  | 37 | -0.5875 | 0.8334 | 0.4855 | 0.0480  | 0.0497 | 0.3415 | 46.8696 | 0.1061 | 11.4009 |
| Stroke | g_Citrobacter     | Weighted median           | 37 | 0.4443  | 0.3488 | 0.2027 | 0.0480  | 0.0497 | 0.3415 | 46.8696 | 0.1061 | 11.4009 |
| Stroke | g_Citrobacter     | Inverse variance weighted | 37 | 0.1721  | 0.2722 | 0.5271 | 0.0480  | 0.0497 | 0.3415 | 46.8696 | 0.1061 | 11.4009 |
| Stroke | g_Citrobacter     | Simple mode               | 37 | 0.8350  | 0.7259 | 0.2576 | 0.0480  | 0.0497 | 0.3415 | 46.8696 | 0.1061 | 11.4009 |
| Stroke | g_Citrobacter     | Weighted mode             | 37 | 0.7536  | 0.6982 | 0.2876 | 0.0480  | 0.0497 | 0.3415 | 46.8696 | 0.1061 | 11.4009 |
| Stroke | g_Clostridium     | MR Egger                  | 37 | 0.1634  | 0.2501 | 0.5178 | -0.0111 | 0.0149 | 0.4602 | 28.3515 | 0.7794 | 13.2225 |
| Stroke | g_Clostridium     | Weighted median           | 37 | -0.1029 | 0.1219 | 0.3986 | -0.0111 | 0.0149 | 0.4602 | 28.3515 | 0.7794 | 13.2225 |
| Stroke | g_Clostridium     | Inverse variance weighted | 37 | -0.0131 | 0.0817 | 0.8729 | -0.0111 | 0.0149 | 0.4602 | 28.3515 | 0.7794 | 13.2225 |
| Stroke | g_Clostridium     | Simple mode               | 37 | -0.1329 | 0.2263 | 0.5608 | -0.0111 | 0.0149 | 0.4602 | 28.3515 | 0.7794 | 13.2225 |
| Stroke | g_Clostridium     | Weighted mode             | 37 | -0.1201 | 0.1932 | 0.5381 | -0.0111 | 0.0149 | 0.4602 | 28.3515 | 0.7794 | 13.2225 |
| Stroke | g_Collinsella     | MR Egger                  | 37 | -0.1774 | 0.8027 | 0.8264 | 0.0366  | 0.0479 | 0.4493 | 36.2928 | 0.4082 | 22.7286 |
| Stroke | g_Collinsella     | Weighted median           | 37 | 0.2656  | 0.3924 | 0.4985 | 0.0366  | 0.0479 | 0.4493 | 36.2928 | 0.4082 | 22.7286 |
| Stroke | g_Collinsella     | Inverse variance weighted | 37 | 0.4031  | 0.2608 | 0.1222 | 0.0366  | 0.0479 | 0.4493 | 36.2928 | 0.4082 | 22.7286 |
| Stroke | g_Collinsella     | Simple mode               | 37 | 0.2244  | 0.8678 | 0.7974 | 0.0366  | 0.0479 | 0.4493 | 36.2928 | 0.4082 | 22.7286 |
| Stroke | g_Collinsella     | Weighted mode             | 37 | 0.1201  | 0.7984 | 0.8813 | 0.0366  | 0.0479 | 0.4493 | 36.2928 | 0.4082 | 22.7286 |
| Stroke | g_Coprobaecillus  | MR Egger                  | 37 | -0.2116 | 0.4040 | 0.6037 | 0.0187  | 0.0241 | 0.4422 | 37.0534 | 0.3744 | 3.7667  |
| Stroke | g_Coprobaecillus  | Weighted median           | 37 | 0.0862  | 0.1875 | 0.6457 | 0.0187  | 0.0241 | 0.4422 | 37.0534 | 0.3744 | 3.7667  |

|        |                    |                           |    |         |        |        |         |        |        |         |        |           |
|--------|--------------------|---------------------------|----|---------|--------|--------|---------|--------|--------|---------|--------|-----------|
| Stroke | g_Coprobacillus    | Inverse variance weighted | 37 | 0.0851  | 0.1313 | 0.5168 | 0.0187  | 0.0241 | 0.4422 | 37.0534 | 0.3744 | 3.7667    |
| Stroke | g_Coprobacillus    | Simple mode               | 37 | 0.1794  | 0.4106 | 0.6647 | 0.0187  | 0.0241 | 0.4422 | 37.0534 | 0.3744 | 3.7667    |
| Stroke | g_Coprobacillus    | Weighted mode             | 37 | 0.2261  | 0.4232 | 0.5964 | 0.0187  | 0.0241 | 0.4422 | 37.0534 | 0.3744 | 3.7667    |
| Stroke | g_Coprococcus      | MR Egger                  | 37 | 0.0912  | 0.3491 | 0.7955 | 0.0027  | 0.0208 | 0.8984 | 33.3449 | 0.5481 | 1.3648    |
| Stroke | g_Coprococcus      | Weighted median           | 37 | 0.0467  | 0.1731 | 0.7875 | 0.0027  | 0.0208 | 0.8984 | 33.3449 | 0.5481 | 1.3648    |
| Stroke | g_Coprococcus      | Inverse variance weighted | 37 | 0.1336  | 0.1141 | 0.2415 | 0.0027  | 0.0208 | 0.8984 | 33.3449 | 0.5481 | 1.3648    |
| Stroke | g_Coprococcus      | Simple mode               | 37 | -0.1994 | 0.3325 | 0.5526 | 0.0027  | 0.0208 | 0.8984 | 33.3449 | 0.5481 | 1.3648    |
| Stroke | g_Coprococcus      | Weighted mode             | 37 | -0.1277 | 0.2936 | 0.6663 | 0.0027  | 0.0208 | 0.8984 | 33.3449 | 0.5481 | 1.3648    |
| Stroke | g_Desulfovibrio    | MR Egger                  | 37 | -0.2530 | 0.9900 | 0.7998 | 0.0481  | 0.0591 | 0.4214 | 42.9620 | 0.1670 | 321.0025  |
| Stroke | g_Desulfovibrio    | Weighted median           | 37 | 0.3531  | 0.4433 | 0.4256 | 0.0481  | 0.0591 | 0.4214 | 42.9620 | 0.1670 | 321.0025  |
| Stroke | g_Desulfovibrio    | Inverse variance weighted | 37 | 0.5083  | 0.3219 | 0.1143 | 0.0481  | 0.0591 | 0.4214 | 42.9620 | 0.1670 | 321.0025  |
| Stroke | g_Desulfovibrio    | Simple mode               | 37 | -0.3788 | 0.9046 | 0.6779 | 0.0481  | 0.0591 | 0.4214 | 42.9620 | 0.1670 | 321.0025  |
| Stroke | g_Desulfovibrio    | Weighted mode             | 37 | -0.1693 | 0.7309 | 0.8181 | 0.0481  | 0.0591 | 0.4214 | 42.9620 | 0.1670 | 321.0025  |
| Stroke | g_Dorea            | MR Egger                  | 37 | 0.3448  | 0.3356 | 0.3112 | -0.0061 | 0.0200 | 0.7643 | 44.4761 | 0.1309 | 1.1726    |
| Stroke | g_Dorea            | Weighted median           | 37 | 0.1731  | 0.1486 | 0.2440 | -0.0061 | 0.0200 | 0.7643 | 44.4761 | 0.1309 | 1.1726    |
| Stroke | g_Dorea            | Inverse variance weighted | 37 | 0.2490  | 0.1083 | 0.0215 | -0.0061 | 0.0200 | 0.7643 | 44.4761 | 0.1309 | 1.1726    |
| Stroke | g_Dorea            | Simple mode               | 37 | 0.2849  | 0.3333 | 0.3984 | -0.0061 | 0.0200 | 0.7643 | 44.4761 | 0.1309 | 1.1726    |
| Stroke | g_Dorea            | Weighted mode             | 37 | 0.0724  | 0.2789 | 0.7966 | -0.0061 | 0.0200 | 0.7643 | 44.4761 | 0.1309 | 1.1726    |
| Stroke | g_Enterobacter     | MR Egger                  | 37 | -0.6581 | 0.9698 | 0.5018 | 0.0475  | 0.0579 | 0.4176 | 50.8859 | 0.0403 | -240.1029 |
| Stroke | g_Enterobacter     | Weighted median           | 37 | -0.1263 | 0.4246 | 0.7661 | 0.0475  | 0.0579 | 0.4176 | 50.8859 | 0.0403 | -240.1029 |
| Stroke | g_Enterobacter     | Inverse variance weighted | 37 | 0.0938  | 0.3156 | 0.7663 | 0.0475  | 0.0579 | 0.4176 | 50.8859 | 0.0403 | -240.1029 |
| Stroke | g_Enterobacter     | Simple mode               | 37 | 1.4611  | 0.9813 | 0.1452 | 0.0475  | 0.0579 | 0.4176 | 50.8859 | 0.0403 | -240.1029 |
| Stroke | g_Enterobacter     | Weighted mode             | 37 | -0.6826 | 0.8842 | 0.4452 | 0.0475  | 0.0579 | 0.4176 | 50.8859 | 0.0403 | -240.1029 |
| Stroke | g_Escherichia      | MR Egger                  | 37 | -0.2821 | 0.7466 | 0.7078 | 0.0253  | 0.0445 | 0.5731 | 51.0394 | 0.0391 | 3.8491    |
| Stroke | g_Escherichia      | Weighted median           | 37 | 0.2352  | 0.3027 | 0.4371 | 0.0253  | 0.0445 | 0.5731 | 51.0394 | 0.0391 | 3.8491    |
| Stroke | g_Escherichia      | Inverse variance weighted | 37 | 0.1192  | 0.2416 | 0.6217 | 0.0253  | 0.0445 | 0.5731 | 51.0394 | 0.0391 | 3.8491    |
| Stroke | g_Escherichia      | Simple mode               | 37 | 0.2660  | 0.5612 | 0.6384 | 0.0253  | 0.0445 | 0.5731 | 51.0394 | 0.0391 | 3.8491    |
| Stroke | g_Escherichia      | Weighted mode             | 37 | 0.2860  | 0.5040 | 0.5739 | 0.0253  | 0.0445 | 0.5731 | 51.0394 | 0.0391 | 3.8491    |
| Stroke | g_Faecalibacterium | MR Egger                  | 37 | -0.0781 | 0.4572 | 0.8654 | 0.0217  | 0.0273 | 0.4323 | 34.2714 | 0.5031 | 1.5311    |
| Stroke | g_Faecalibacterium | Weighted median           | 37 | 0.0623  | 0.2206 | 0.7775 | 0.0217  | 0.0273 | 0.4323 | 34.2714 | 0.5031 | 1.5311    |
| Stroke | g_Faecalibacterium | Inverse variance weighted | 37 | 0.2652  | 0.1494 | 0.0758 | 0.0217  | 0.0273 | 0.4323 | 34.2714 | 0.5031 | 1.5311    |
| Stroke | g_Faecalibacterium | Simple mode               | 37 | -0.3886 | 0.4212 | 0.3624 | 0.0217  | 0.0273 | 0.4323 | 34.2714 | 0.5031 | 1.5311    |
| Stroke | g_Faecalibacterium | Weighted mode             | 37 | -0.2860 | 0.3389 | 0.4043 | 0.0217  | 0.0273 | 0.4323 | 34.2714 | 0.5031 | 1.5311    |
| Stroke | g_Fusobacterium    | MR Egger                  | 37 | -0.9116 | 1.0045 | 0.3704 | 0.0554  | 0.0599 | 0.3613 | 31.8233 | 0.6223 | 30.4154   |
| Stroke | g_Fusobacterium    | Weighted median           | 37 | -0.1703 | 0.4718 | 0.7181 | 0.0554  | 0.0599 | 0.3613 | 31.8233 | 0.6223 | 30.4154   |
| Stroke | g_Fusobacterium    | Inverse variance weighted | 37 | -0.0334 | 0.3282 | 0.9190 | 0.0554  | 0.0599 | 0.3613 | 31.8233 | 0.6223 | 30.4154   |
| Stroke | g_Fusobacterium    | Simple mode               | 37 | -0.9256 | 0.9477 | 0.3353 | 0.0554  | 0.0599 | 0.3613 | 31.8233 | 0.6223 | 30.4154   |
| Stroke | g_Fusobacterium    | Weighted mode             | 37 | -0.6608 | 0.8792 | 0.4571 | 0.0554  | 0.0599 | 0.3613 | 31.8233 | 0.6223 | 30.4154   |
| Stroke | g_Gemella          | MR Egger                  | 37 | -0.3828 | 0.4034 | 0.3492 | 0.0283  | 0.0241 | 0.2468 | 19.5484 | 0.9884 | 3.0553    |
| Stroke | g_Gemella          | Weighted median           | 37 | -0.0980 | 0.1756 | 0.5766 | 0.0283  | 0.0241 | 0.2468 | 19.5484 | 0.9884 | 3.0553    |
| Stroke | g_Gemella          | Inverse variance weighted | 37 | 0.0663  | 0.1318 | 0.6150 | 0.0283  | 0.0241 | 0.2468 | 19.5484 | 0.9884 | 3.0553    |
| Stroke | g_Gemella          | Simple mode               | 37 | -0.1984 | 0.3785 | 0.6033 | 0.0283  | 0.0241 | 0.2468 | 19.5484 | 0.9884 | 3.0553    |
| Stroke | g_Gemella          | Weighted mode             | 37 | -0.2150 | 0.2921 | 0.4666 | 0.0283  | 0.0241 | 0.2468 | 19.5484 | 0.9884 | 3.0553    |
| Stroke | g_Granulicatella   | MR Egger                  | 37 | -0.4060 | 0.3543 | 0.2596 | 0.0201  | 0.0211 | 0.3472 | 26.6190 | 0.8726 | 2.9095    |
| Stroke | g_Granulicatella   | Weighted median           | 37 | -0.1246 | 0.1692 | 0.4616 | 0.0201  | 0.0211 | 0.3472 | 26.6190 | 0.8726 | 2.9095    |
| Stroke | g_Granulicatella   | Inverse variance weighted | 37 | -0.0870 | 0.1158 | 0.4525 | 0.0201  | 0.0211 | 0.3472 | 26.6190 | 0.8726 | 2.9095    |
| Stroke | g_Granulicatella   | Simple mode               | 37 | 0.0481  | 0.3461 | 0.8903 | 0.0201  | 0.0211 | 0.3472 | 26.6190 | 0.8726 | 2.9095    |
| Stroke | g_Granulicatella   | Weighted mode             | 37 | -0.0858 | 0.3333 | 0.7983 | 0.0201  | 0.0211 | 0.3472 | 26.6190 | 0.8726 | 2.9095    |
| Stroke | g_Holdemania       | MR Egger                  | 37 | -0.1134 | 0.3081 | 0.7151 | 0.0108  | 0.0184 | 0.5591 | 29.9370 | 0.7110 | 6.1063    |
| Stroke | g_Holdemania       | Weighted median           | 37 | -0.0496 | 0.1442 | 0.7308 | 0.0108  | 0.0184 | 0.5591 | 29.9370 | 0.7110 | 6.1063    |
| Stroke | g_Holdemania       | Inverse variance weighted | 37 | 0.0584  | 0.1007 | 0.5621 | 0.0108  | 0.0184 | 0.5591 | 29.9370 | 0.7110 | 6.1063    |
| Stroke | g_Holdemania       | Simple mode               | 37 | 0.3157  | 0.3095 | 0.3145 | 0.0108  | 0.0184 | 0.5591 | 29.9370 | 0.7110 | 6.1063    |
| Stroke | g_Holdemania       | Weighted mode             | 37 | -0.2371 | 0.2400 | 0.3297 | 0.0108  | 0.0184 | 0.5591 | 29.9370 | 0.7110 | 6.1063    |
| Stroke | g_Klebsiella       | MR Egger                  | 37 | -0.9939 | 0.9761 | 0.3155 | 0.0733  | 0.0582 | 0.2163 | 49.0213 | 0.0725 | -215.2569 |
| Stroke | g_Klebsiella       | Weighted median           | 37 | 0.6556  | 0.4163 | 0.1153 | 0.0733  | 0.0582 | 0.2163 | 49.0213 | 0.0725 | -215.2569 |
| Stroke | g_Klebsiella       | Inverse variance weighted | 37 | 0.1677  | 0.3217 | 0.6021 | 0.0733  | 0.0582 | 0.2163 | 49.0213 | 0.0725 | -215.2569 |
| Stroke | g_Klebsiella       | Simple mode               | 37 | 1.4190  | 0.9338 | 0.1374 | 0.0733  | 0.0582 | 0.2163 | 49.0213 | 0.0725 | -215.2569 |
| Stroke | g_Klebsiella       | Weighted mode             | 37 | 1.2209  | 0.9282 | 0.1967 | 0.0733  | 0.0582 | 0.2163 | 49.0213 | 0.0725 | -215.2569 |
| Stroke | g_Lactococcus      | MR Egger                  | 37 | -0.1693 | 0.5028 | 0.7383 | 0.0306  | 0.0300 | 0.3145 | 28.8643 | 0.7950 | 1.4645    |
| Stroke | g_Lactococcus      | Weighted median           | 37 | 0.2685  | 0.2384 | 0.2600 | 0.0306  | 0.0300 | 0.3145 | 28.8643 | 0.7950 | 1.4645    |
| Stroke | g_Lactococcus      | Inverse variance weighted | 37 | 0.3156  | 0.1643 | 0.0548 | 0.0306  | 0.0300 | 0.3145 | 28.8643 | 0.7950 | 1.4645    |

|        |                        |                           |    |         |        |        |         |        |        |         |        |           |
|--------|------------------------|---------------------------|----|---------|--------|--------|---------|--------|--------|---------|--------|-----------|
| Stroke | g_Lactococcus          | Simple mode               | 37 | 0.3966  | 0.4702 | 0.4046 | 0.0306  | 0.0300 | 0.3145 | 28.8643 | 0.7950 | 1.4645    |
| Stroke | g_Lactococcus          | Weighted mode             | 37 | 0.2420  | 0.3597 | 0.5054 | 0.0306  | 0.0300 | 0.3145 | 28.8643 | 0.7950 | 1.4645    |
| Stroke | g_Megasphaera          | MR Egger                  | 37 | 0.5721  | 0.6400 | 0.3775 | -0.0314 | 0.0382 | 0.4157 | 38.7540 | 0.3041 | 17.8511   |
| Stroke | g_Megasphaera          | Weighted median           | 37 | 0.1058  | 0.3013 | 0.7253 | -0.0314 | 0.0382 | 0.4157 | 38.7540 | 0.3041 | 17.8511   |
| Stroke | g_Megasphaera          | Inverse variance weighted | 37 | 0.0738  | 0.2082 | 0.7228 | -0.0314 | 0.0382 | 0.4157 | 38.7540 | 0.3041 | 17.8511   |
| Stroke | g_Megasphaera          | Simple mode               | 37 | 0.0668  | 0.5965 | 0.9114 | -0.0314 | 0.0382 | 0.4157 | 38.7540 | 0.3041 | 17.8511   |
| Stroke | g_Megasphaera          | Weighted mode             | 37 | 0.0865  | 0.4710 | 0.8553 | -0.0314 | 0.0382 | 0.4157 | 38.7540 | 0.3041 | 17.8511   |
| Stroke | g_Mitsuokella          | MR Egger                  | 37 | 0.5882  | 0.6543 | 0.3748 | -0.0184 | 0.0390 | 0.6397 | 34.0503 | 0.5138 | 88.1343   |
| Stroke | g_Mitsuokella          | Weighted median           | 37 | 0.4307  | 0.3011 | 0.1526 | -0.0184 | 0.0390 | 0.6397 | 34.0503 | 0.5138 | 88.1343   |
| Stroke | g_Mitsuokella          | Inverse variance weighted | 37 | 0.2962  | 0.2138 | 0.1660 | -0.0184 | 0.0390 | 0.6397 | 34.0503 | 0.5138 | 88.1343   |
| Stroke | g_Mitsuokella          | Simple mode               | 37 | 0.8084  | 0.6472 | 0.2197 | -0.0184 | 0.0390 | 0.6397 | 34.0503 | 0.5138 | 88.1343   |
| Stroke | g_Mitsuokella          | Weighted mode             | 37 | 0.7886  | 0.5383 | 0.1516 | -0.0184 | 0.0390 | 0.6397 | 34.0503 | 0.5138 | 88.1343   |
| Stroke | g_Mobiluncus           | MR Egger                  | 37 | 0.2227  | 0.4111 | 0.5914 | -0.0177 | 0.0245 | 0.4745 | 22.6582 | 0.9467 | 7.2353    |
| Stroke | g_Mobiluncus           | Weighted median           | 37 | -0.1114 | 0.1797 | 0.5354 | -0.0177 | 0.0245 | 0.4745 | 22.6582 | 0.9467 | 7.2353    |
| Stroke | g_Mobiluncus           | Inverse variance weighted | 37 | -0.0582 | 0.1343 | 0.6648 | -0.0177 | 0.0245 | 0.4745 | 22.6582 | 0.9467 | 7.2353    |
| Stroke | g_Mobiluncus           | Simple mode               | 37 | -0.1396 | 0.3402 | 0.6840 | -0.0177 | 0.0245 | 0.4745 | 22.6582 | 0.9467 | 7.2353    |
| Stroke | g_Mobiluncus           | Weighted mode             | 37 | -0.1516 | 0.3021 | 0.6189 | -0.0177 | 0.0245 | 0.4745 | 22.6582 | 0.9467 | 7.2353    |
| Stroke | g_Odoribacter          | MR Egger                  | 37 | 0.9104  | 0.4727 | 0.0623 | -0.0510 | 0.0282 | 0.0793 | 38.8850 | 0.3411 | 3.5654    |
| Stroke | g_Odoribacter          | Weighted median           | 37 | 0.1738  | 0.2354 | 0.4604 | -0.0510 | 0.0282 | 0.0793 | 38.8850 | 0.3411 | 3.5654    |
| Stroke | g_Odoribacter          | Inverse variance weighted | 37 | 0.1028  | 0.1592 | 0.5185 | -0.0510 | 0.0282 | 0.0793 | 38.8850 | 0.3411 | 3.5654    |
| Stroke | g_Odoribacter          | Simple mode               | 37 | 0.6393  | 0.4646 | 0.1773 | -0.0510 | 0.0282 | 0.0793 | 38.8850 | 0.3411 | 3.5654    |
| Stroke | g_Odoribacter          | Weighted mode             | 37 | 0.1748  | 0.3513 | 0.6219 | -0.0510 | 0.0282 | 0.0793 | 38.8850 | 0.3411 | 3.5654    |
| Stroke | g_Oribacterium         | MR Egger                  | 37 | 0.0664  | 0.2955 | 0.8235 | -0.0118 | 0.0176 | 0.5079 | 28.9731 | 0.7535 | 12.6273   |
| Stroke | g_Oribacterium         | Weighted median           | 37 | -0.0671 | 0.1388 | 0.6290 | -0.0118 | 0.0176 | 0.5079 | 28.9731 | 0.7535 | 12.6273   |
| Stroke | g_Oribacterium         | Inverse variance weighted | 37 | -0.1204 | 0.0966 | 0.2124 | -0.0118 | 0.0176 | 0.5079 | 28.9731 | 0.7535 | 12.6273   |
| Stroke | g_Oribacterium         | Simple mode               | 37 | -0.0588 | 0.2749 | 0.8319 | -0.0118 | 0.0176 | 0.5079 | 28.9731 | 0.7535 | 12.6273   |
| Stroke | g_Oribacterium         | Weighted mode             | 37 | -0.1435 | 0.2421 | 0.5571 | -0.0118 | 0.0176 | 0.5079 | 28.9731 | 0.7535 | 12.6273   |
| Stroke | g_Oscillibacter        | MR Egger                  | 37 | 0.2849  | 0.5060 | 0.5770 | -0.0135 | 0.0302 | 0.6570 | 34.0457 | 0.5140 | 1.4961    |
| Stroke | g_Oscillibacter        | Weighted median           | 37 | 0.0290  | 0.2485 | 0.9070 | -0.0135 | 0.0302 | 0.6570 | 34.0457 | 0.5140 | 1.4961    |
| Stroke | g_Oscillibacter        | Inverse variance weighted | 37 | 0.0707  | 0.1653 | 0.6688 | -0.0135 | 0.0302 | 0.6570 | 34.0457 | 0.5140 | 1.4961    |
| Stroke | g_Oscillibacter        | Simple mode               | 37 | 0.2219  | 0.4728 | 0.6416 | -0.0135 | 0.0302 | 0.6570 | 34.0457 | 0.5140 | 1.4961    |
| Stroke | g_Oscillibacter        | Weighted mode             | 37 | -0.1301 | 0.4242 | 0.7609 | -0.0135 | 0.0302 | 0.6570 | 34.0457 | 0.5140 | 1.4961    |
| Stroke | g_Oxalobacter          | MR Egger                  | 37 | 1.5472  | 0.7577 | 0.0488 | -0.0842 | 0.0452 | 0.0711 | 28.3523 | 0.8144 | 364.7360  |
| Stroke | g_Oxalobacter          | Weighted median           | 37 | 0.1679  | 0.3430 | 0.6245 | -0.0842 | 0.0452 | 0.0711 | 28.3523 | 0.8144 | 364.7360  |
| Stroke | g_Oxalobacter          | Inverse variance weighted | 37 | 0.2140  | 0.2477 | 0.3876 | -0.0842 | 0.0452 | 0.0711 | 28.3523 | 0.8144 | 364.7360  |
| Stroke | g_Oxalobacter          | Simple mode               | 37 | -0.3187 | 0.7015 | 0.6524 | -0.0842 | 0.0452 | 0.0711 | 28.3523 | 0.8144 | 364.7360  |
| Stroke | g_Oxalobacter          | Weighted mode             | 37 | -0.2720 | 0.6434 | 0.6750 | -0.0842 | 0.0452 | 0.0711 | 28.3523 | 0.8144 | 364.7360  |
| Stroke | g_Parabacteroides      | MR Egger                  | 37 | 0.3798  | 0.2800 | 0.1836 | -0.0301 | 0.0167 | 0.0805 | 32.5266 | 0.6346 | 12.9154   |
| Stroke | g_Parabacteroides      | Weighted median           | 37 | -0.0175 | 0.1361 | 0.8974 | -0.0301 | 0.0167 | 0.0805 | 32.5266 | 0.6346 | 12.9154   |
| Stroke | g_Parabacteroides      | Inverse variance weighted | 37 | -0.0966 | 0.0915 | 0.2911 | -0.0301 | 0.0167 | 0.0805 | 32.5266 | 0.6346 | 12.9154   |
| Stroke | g_Parabacteroides      | Simple mode               | 37 | -0.0403 | 0.2803 | 0.8866 | -0.0301 | 0.0167 | 0.0805 | 32.5266 | 0.6346 | 12.9154   |
| Stroke | g_Parabacteroides      | Weighted mode             | 37 | 0.0400  | 0.2343 | 0.8654 | -0.0301 | 0.0167 | 0.0805 | 32.5266 | 0.6346 | 12.9154   |
| Stroke | g_Paraprevotella       | MR Egger                  | 37 | -0.2244 | 0.4468 | 0.6186 | 0.0167  | 0.0267 | 0.5358 | 27.2083 | 0.8237 | 1.7277    |
| Stroke | g_Paraprevotella       | Weighted median           | 37 | -0.0936 | 0.2033 | 0.6453 | 0.0167  | 0.0267 | 0.5358 | 27.2083 | 0.8237 | 1.7277    |
| Stroke | g_Paraprevotella       | Inverse variance weighted | 37 | 0.0396  | 0.1460 | 0.7861 | 0.0167  | 0.0267 | 0.5358 | 27.2083 | 0.8237 | 1.7277    |
| Stroke | g_Paraprevotella       | Simple mode               | 37 | -0.2531 | 0.3857 | 0.5159 | 0.0167  | 0.0267 | 0.5358 | 27.2083 | 0.8237 | 1.7277    |
| Stroke | g_Paraprevotella       | Weighted mode             | 37 | -0.2311 | 0.3552 | 0.5194 | 0.0167  | 0.0267 | 0.5358 | 27.2083 | 0.8237 | 1.7277    |
| Stroke | g_Parasutterella       | MR Egger                  | 37 | -0.1817 | 1.1149 | 0.8715 | -0.0032 | 0.0665 | 0.9619 | 43.6475 | 0.1498 | -498.2010 |
| Stroke | g_Parasutterella       | Weighted median           | 37 | -0.3600 | 0.4838 | 0.4568 | -0.0032 | 0.0665 | 0.9619 | 43.6475 | 0.1498 | -498.2010 |
| Stroke | g_Parasutterella       | Inverse variance weighted | 37 | -0.2323 | 0.3592 | 0.5177 | -0.0032 | 0.0665 | 0.9619 | 43.6475 | 0.1498 | -498.2010 |
| Stroke | g_Parasutterella       | Simple mode               | 37 | -0.5466 | 1.0367 | 0.6013 | -0.0032 | 0.0665 | 0.9619 | 43.6475 | 0.1498 | -498.2010 |
| Stroke | g_Parasutterella       | Weighted mode             | 37 | -0.6627 | 0.8604 | 0.4462 | -0.0032 | 0.0665 | 0.9619 | 43.6475 | 0.1498 | -498.2010 |
| Stroke | g_Peptoniphilus        | MR Egger                  | 37 | 0.0375  | 0.6145 | 0.9516 | -0.0044 | 0.0367 | 0.9056 | 43.8856 | 0.1442 | 8.9191    |
| Stroke | g_Peptoniphilus        | Weighted median           | 37 | -0.0897 | 0.2819 | 0.7504 | -0.0044 | 0.0367 | 0.9056 | 43.8856 | 0.1442 | 8.9191    |
| Stroke | g_Peptoniphilus        | Inverse variance weighted | 37 | -0.0318 | 0.1981 | 0.8723 | -0.0044 | 0.0367 | 0.9056 | 43.8856 | 0.1442 | 8.9191    |
| Stroke | g_Peptoniphilus        | Simple mode               | 37 | -0.2042 | 0.6252 | 0.7459 | -0.0044 | 0.0367 | 0.9056 | 43.8856 | 0.1442 | 8.9191    |
| Stroke | g_Peptoniphilus        | Weighted mode             | 37 | -0.2223 | 0.6025 | 0.7143 | -0.0044 | 0.0367 | 0.9056 | 43.8856 | 0.1442 | 8.9191    |
| Stroke | g_Phascalartobacterium | MR Egger                  | 37 | 0.0622  | 0.6036 | 0.9185 | -0.0020 | 0.0360 | 0.9557 | 24.1345 | 0.9166 | 1.3649    |
| Stroke | g_Phascalartobacterium | Weighted median           | 37 | -0.0120 | 0.2639 | 0.9636 | -0.0020 | 0.0360 | 0.9557 | 24.1345 | 0.9166 | 1.3649    |
| Stroke | g_Phascalartobacterium | Inverse variance weighted | 37 | 0.0303  | 0.1973 | 0.8779 | -0.0020 | 0.0360 | 0.9557 | 24.1345 | 0.9166 | 1.3649    |
| Stroke | g_Phascalartobacterium | Simple mode               | 37 | -0.1554 | 0.5284 | 0.7704 | -0.0020 | 0.0360 | 0.9557 | 24.1345 | 0.9166 | 1.3649    |

|        |                         |                           |    |         |        |        |         |        |        |         |        |          |
|--------|-------------------------|---------------------------|----|---------|--------|--------|---------|--------|--------|---------|--------|----------|
| Stroke | g_Phascolarctobacterium | Weighted mode             | 37 | -0.1277 | 0.4532 | 0.7796 | -0.0020 | 0.0360 | 0.9557 | 24.1345 | 0.9166 | 1.3649   |
| Stroke | g_Porphyrromonas        | MR Egger                  | 37 | -0.4887 | 0.6828 | 0.4789 | 0.0239  | 0.0407 | 0.5618 | 31.7446 | 0.6261 | 1.0629   |
| Stroke | g_Porphyrromonas        | Weighted median           | 37 | -0.2023 | 0.3290 | 0.5386 | 0.0239  | 0.0407 | 0.5618 | 31.7446 | 0.6261 | 1.0629   |
| Stroke | g_Porphyrromonas        | Inverse variance weighted | 37 | -0.1107 | 0.2231 | 0.6198 | 0.0239  | 0.0407 | 0.5618 | 31.7446 | 0.6261 | 1.0629   |
| Stroke | g_Porphyrromonas        | Simple mode               | 37 | 0.5217  | 0.7133 | 0.4692 | 0.0239  | 0.0407 | 0.5618 | 31.7446 | 0.6261 | 1.0629   |
| Stroke | g_Porphyrromonas        | Weighted mode             | 37 | -0.5017 | 0.6139 | 0.4191 | 0.0239  | 0.0407 | 0.5618 | 31.7446 | 0.6261 | 1.0629   |
| Stroke | g_Providencia           | MR Egger                  | 37 | -0.8026 | 0.8150 | 0.3315 | 0.0511  | 0.0486 | 0.3004 | 54.0855 | 0.0269 | 10.0415  |
| Stroke | g_Providencia           | Weighted median           | 37 | 0.1650  | 0.3402 | 0.6277 | 0.0511  | 0.0486 | 0.3004 | 54.0855 | 0.0269 | 10.0415  |
| Stroke | g_Providencia           | Inverse variance weighted | 37 | 0.0070  | 0.2668 | 0.9792 | 0.0511  | 0.0486 | 0.3004 | 54.0855 | 0.0269 | 10.0415  |
| Stroke | g_Providencia           | Simple mode               | 37 | 0.7938  | 0.7239 | 0.2801 | 0.0511  | 0.0486 | 0.3004 | 54.0855 | 0.0269 | 10.0415  |
| Stroke | g_Providencia           | Weighted mode             | 37 | 0.4844  | 0.6301 | 0.4470 | 0.0511  | 0.0486 | 0.3004 | 54.0855 | 0.0269 | 10.0415  |
| Stroke | g_Pseudoflavonifractor  | MR Egger                  | 37 | -0.0416 | 0.2634 | 0.8755 | 0.0055  | 0.0157 | 0.7261 | 24.5596 | 0.9061 | 12.9329  |
| Stroke | g_Pseudoflavonifractor  | Weighted median           | 37 | 0.0106  | 0.1212 | 0.9301 | 0.0055  | 0.0157 | 0.7261 | 24.5596 | 0.9061 | 12.9329  |
| Stroke | g_Pseudoflavonifractor  | Inverse variance weighted | 37 | 0.0463  | 0.0861 | 0.5902 | 0.0055  | 0.0157 | 0.7261 | 24.5596 | 0.9061 | 12.9329  |
| Stroke | g_Pseudoflavonifractor  | Simple mode               | 37 | -0.0314 | 0.2093 | 0.8815 | 0.0055  | 0.0157 | 0.7261 | 24.5596 | 0.9061 | 12.9329  |
| Stroke | g_Pseudoflavonifractor  | Weighted mode             | 37 | -0.0121 | 0.2019 | 0.9524 | 0.0055  | 0.0157 | 0.7261 | 24.5596 | 0.9061 | 12.9329  |
| Stroke | g_Roseburia             | MR Egger                  | 37 | 0.7317  | 0.3883 | 0.0678 | -0.0312 | 0.0232 | 0.1868 | 35.9643 | 0.4703 | 2.1174   |
| Stroke | g_Roseburia             | Weighted median           | 37 | 0.2352  | 0.1884 | 0.2119 | -0.0312 | 0.0232 | 0.1868 | 35.9643 | 0.4703 | 2.1174   |
| Stroke | g_Roseburia             | Inverse variance weighted | 37 | 0.2376  | 0.1269 | 0.0612 | -0.0312 | 0.0232 | 0.1868 | 35.9643 | 0.4703 | 2.1174   |
| Stroke | g_Roseburia             | Simple mode               | 37 | 0.6215  | 0.3947 | 0.1241 | -0.0312 | 0.0232 | 0.1868 | 35.9643 | 0.4703 | 2.1174   |
| Stroke | g_Roseburia             | Weighted mode             | 37 | 0.2839  | 0.3619 | 0.4380 | -0.0312 | 0.0232 | 0.1868 | 35.9643 | 0.4703 | 2.1174   |
| Stroke | g_Ruminococcus          | MR Egger                  | 37 | -0.1803 | 0.3365 | 0.5955 | 0.0240  | 0.0201 | 0.2402 | 37.6605 | 0.3931 | 4.3640   |
| Stroke | g_Ruminococcus          | Weighted median           | 37 | 0.2492  | 0.1628 | 0.1258 | 0.0240  | 0.0201 | 0.2402 | 37.6605 | 0.3931 | 4.3640   |
| Stroke | g_Ruminococcus          | Inverse variance weighted | 37 | 0.1996  | 0.1106 | 0.0710 | 0.0240  | 0.0201 | 0.2402 | 37.6605 | 0.3931 | 4.3640   |
| Stroke | g_Ruminococcus          | Simple mode               | 37 | 0.4485  | 0.3377 | 0.1925 | 0.0240  | 0.0201 | 0.2402 | 37.6605 | 0.3931 | 4.3640   |
| Stroke | g_Ruminococcus          | Weighted mode             | 37 | 0.2590  | 0.3025 | 0.3975 | 0.0240  | 0.0201 | 0.2402 | 37.6605 | 0.3931 | 4.3640   |
| Stroke | g_Salmonella            | MR Egger                  | 37 | -0.7346 | 0.7723 | 0.3480 | 0.0514  | 0.0461 | 0.2720 | 52.2176 | 0.0394 | 9.9411   |
| Stroke | g_Salmonella            | Weighted median           | 37 | 0.4324  | 0.3243 | 0.1824 | 0.0514  | 0.0461 | 0.2720 | 52.2176 | 0.0394 | 9.9411   |
| Stroke | g_Salmonella            | Inverse variance weighted | 37 | 0.0800  | 0.2533 | 0.7520 | 0.0514  | 0.0461 | 0.2720 | 52.2176 | 0.0394 | 9.9411   |
| Stroke | g_Salmonella            | Simple mode               | 37 | 0.8380  | 0.6766 | 0.2235 | 0.0514  | 0.0461 | 0.2720 | 52.2176 | 0.0394 | 9.9411   |
| Stroke | g_Salmonella            | Weighted mode             | 37 | 0.7431  | 0.6177 | 0.2368 | 0.0514  | 0.0461 | 0.2720 | 52.2176 | 0.0394 | 9.9411   |
| Stroke | g_Shuttleworthia        | MR Egger                  | 37 | -0.2209 | 0.5873 | 0.7091 | -0.0019 | 0.0350 | 0.9560 | 34.4125 | 0.4963 | 1.8816   |
| Stroke | g_Shuttleworthia        | Weighted median           | 37 | -0.1706 | 0.2706 | 0.5284 | -0.0019 | 0.0350 | 0.9560 | 34.4125 | 0.4963 | 1.8816   |
| Stroke | g_Shuttleworthia        | Inverse variance weighted | 37 | -0.2517 | 0.1919 | 0.1897 | -0.0019 | 0.0350 | 0.9560 | 34.4125 | 0.4963 | 1.8816   |
| Stroke | g_Shuttleworthia        | Simple mode               | 37 | -0.2261 | 0.5328 | 0.6738 | -0.0019 | 0.0350 | 0.9560 | 34.4125 | 0.4963 | 1.8816   |
| Stroke | g_Shuttleworthia        | Weighted mode             | 37 | -0.2261 | 0.4321 | 0.6040 | -0.0019 | 0.0350 | 0.9560 | 34.4125 | 0.4963 | 1.8816   |
| Stroke | g_Solobacterium         | MR Egger                  | 37 | 0.0615  | 0.4741 | 0.8975 | 0.0019  | 0.0283 | 0.9474 | 26.5490 | 0.8470 | 1.2498   |
| Stroke | g_Solobacterium         | Weighted median           | 37 | 0.0208  | 0.2241 | 0.9261 | 0.0019  | 0.0283 | 0.9474 | 26.5490 | 0.8470 | 1.2498   |
| Stroke | g_Solobacterium         | Inverse variance weighted | 37 | 0.0913  | 0.1549 | 0.5556 | 0.0019  | 0.0283 | 0.9474 | 26.5490 | 0.8470 | 1.2498   |
| Stroke | g_Solobacterium         | Simple mode               | 37 | -0.0895 | 0.4250 | 0.8344 | 0.0019  | 0.0283 | 0.9474 | 26.5490 | 0.8470 | 1.2498   |
| Stroke | g_Solobacterium         | Weighted mode             | 37 | -0.0654 | 0.3634 | 0.8583 | 0.0019  | 0.0283 | 0.9474 | 26.5490 | 0.8470 | 1.2498   |
| Stroke | g_Subdoligranulum       | MR Egger                  | 37 | 0.4471  | 0.3879 | 0.2569 | -0.0107 | 0.0231 | 0.6477 | 40.1018 | 0.2542 | 2.1764   |
| Stroke | g_Subdoligranulum       | Weighted median           | 37 | 0.2596  | 0.1848 | 0.1602 | -0.0107 | 0.0231 | 0.6477 | 40.1018 | 0.2542 | 2.1764   |
| Stroke | g_Subdoligranulum       | Inverse variance weighted | 37 | 0.2781  | 0.1254 | 0.0265 | -0.0107 | 0.0231 | 0.6477 | 40.1018 | 0.2542 | 2.1764   |
| Stroke | g_Subdoligranulum       | Simple mode               | 37 | 0.4424  | 0.3964 | 0.2718 | -0.0107 | 0.0231 | 0.6477 | 40.1018 | 0.2542 | 2.1764   |
| Stroke | g_Subdoligranulum       | Weighted mode             | 37 | 0.3048  | 0.3577 | 0.3997 | -0.0107 | 0.0231 | 0.6477 | 40.1018 | 0.2542 | 2.1764   |
| Stroke | g_Sutterella            | MR Egger                  | 37 | 1.3478  | 1.0305 | 0.1994 | -0.0534 | 0.0615 | 0.3911 | 28.6258 | 0.7681 | 227.1724 |
| Stroke | g_Sutterella            | Weighted median           | 37 | 0.2175  | 0.4977 | 0.6621 | -0.0534 | 0.0615 | 0.3911 | 28.6258 | 0.7681 | 227.1724 |
| Stroke | g_Sutterella            | Inverse variance weighted | 37 | 0.5020  | 0.3367 | 0.1360 | -0.0534 | 0.0615 | 0.3911 | 28.6258 | 0.7681 | 227.1724 |
| Stroke | g_Sutterella            | Simple mode               | 37 | -0.4689 | 0.9453 | 0.6229 | -0.0534 | 0.0615 | 0.3911 | 28.6258 | 0.7681 | 227.1724 |
| Stroke | g_Sutterella            | Weighted mode             | 37 | -0.0787 | 0.8819 | 0.9294 | -0.0534 | 0.0615 | 0.3911 | 28.6258 | 0.7681 | 227.1724 |
| Stroke | g_Tannerella            | MR Egger                  | 37 | 0.5577  | 0.5692 | 0.3339 | -0.0312 | 0.0340 | 0.3646 | 41.2827 | 0.2151 | 1.6321   |
| Stroke | g_Tannerella            | Weighted median           | 37 | -0.0449 | 0.2607 | 0.8632 | -0.0312 | 0.0340 | 0.3646 | 41.2827 | 0.2151 | 1.6321   |
| Stroke | g_Tannerella            | Inverse variance weighted | 37 | 0.0635  | 0.1855 | 0.7320 | -0.0312 | 0.0340 | 0.3646 | 41.2827 | 0.2151 | 1.6321   |
| Stroke | g_Tannerella            | Simple mode               | 37 | 0.0083  | 0.5257 | 0.9875 | -0.0312 | 0.0340 | 0.3646 | 41.2827 | 0.2151 | 1.6321   |
| Stroke | g_Tannerella            | Weighted mode             | 37 | 0.0245  | 0.4899 | 0.9604 | -0.0312 | 0.0340 | 0.3646 | 41.2827 | 0.2151 | 1.6321   |
| Stroke | g_Treponema             | MR Egger                  | 37 | 0.2471  | 0.3793 | 0.5191 | -0.0027 | 0.0226 | 0.9068 | 29.7070 | 0.7213 | 4.9463   |
| Stroke | g_Treponema             | Weighted median           | 37 | 0.2575  | 0.1759 | 0.1433 | -0.0027 | 0.0226 | 0.9068 | 29.7070 | 0.7213 | 4.9463   |
| Stroke | g_Treponema             | Inverse variance weighted | 37 | 0.2048  | 0.1239 | 0.0985 | -0.0027 | 0.0226 | 0.9068 | 29.7070 | 0.7213 | 4.9463   |
| Stroke | g_Treponema             | Simple mode               | 37 | 0.2064  | 0.3588 | 0.5688 | -0.0027 | 0.0226 | 0.9068 | 29.7070 | 0.7213 | 4.9463   |
| Stroke | g_Treponema             | Weighted mode             | 37 | 0.1178  | 0.3015 | 0.6983 | -0.0027 | 0.0226 | 0.9068 | 29.7070 | 0.7213 | 4.9463   |

|        |                           |                           |    |         |        |        |         |        |        |         |        |            |
|--------|---------------------------|---------------------------|----|---------|--------|--------|---------|--------|--------|---------|--------|------------|
| Stroke | g_Turicibacter            | MR Egger                  | 37 | -0.6470 | 1.0150 | 0.5280 | 0.0504  | 0.0606 | 0.4107 | 47.8091 | 0.0730 | -49.7732   |
| Stroke | g_Turicibacter            | Weighted median           | 37 | 0.3334  | 0.4092 | 0.4153 | 0.0504  | 0.0606 | 0.4107 | 47.8091 | 0.0730 | -49.7732   |
| Stroke | g_Turicibacter            | Inverse variance weighted | 37 | 0.1518  | 0.3303 | 0.6459 | 0.0504  | 0.0606 | 0.4107 | 47.8091 | 0.0730 | -49.7732   |
| Stroke | g_Turicibacter            | Simple mode               | 37 | 0.5046  | 0.8887 | 0.5737 | 0.0504  | 0.0606 | 0.4107 | 47.8091 | 0.0730 | -49.7732   |
| Stroke | g_Turicibacter            | Weighted mode             | 37 | 0.4314  | 0.7639 | 0.5758 | 0.0504  | 0.0606 | 0.4107 | 47.8091 | 0.0730 | -49.7732   |
| Stroke | g_Veillonella             | MR Egger                  | 37 | -1.3462 | 0.5830 | 0.0270 | 0.0664  | 0.0348 | 0.0644 | 31.9055 | 0.6638 | 1.3262     |
| Stroke | g_Veillonella             | Weighted median           | 37 | -0.4294 | 0.2704 | 0.1123 | 0.0664  | 0.0348 | 0.0644 | 31.9055 | 0.6638 | 1.3262     |
| Stroke | g_Veillonella             | Inverse variance weighted | 37 | -0.2942 | 0.1906 | 0.1226 | 0.0664  | 0.0348 | 0.0644 | 31.9055 | 0.6638 | 1.3262     |
| Stroke | g_Veillonella             | Simple mode               | 37 | -0.5867 | 0.5473 | 0.2909 | 0.0664  | 0.0348 | 0.0644 | 31.9055 | 0.6638 | 1.3262     |
| Stroke | g_Veillonella             | Weighted mode             | 37 | -0.5220 | 0.5083 | 0.3113 | 0.0664  | 0.0348 | 0.0644 | 31.9055 | 0.6638 | 1.3262     |
| Stroke | g_Vibrio                  | MR Egger                  | 37 | -0.4875 | 0.8811 | 0.5836 | 0.0312  | 0.0526 | 0.5569 | 43.0850 | 0.1638 | 13922.0974 |
| Stroke | g_Vibrio                  | Weighted median           | 37 | -0.2029 | 0.3929 | 0.6056 | 0.0312  | 0.0526 | 0.5569 | 43.0850 | 0.1638 | 13922.0974 |
| Stroke | g_Vibrio                  | Inverse variance weighted | 37 | 0.0064  | 0.2854 | 0.9821 | 0.0312  | 0.0526 | 0.5569 | 43.0850 | 0.1638 | 13922.0974 |
| Stroke | g_Vibrio                  | Simple mode               | 37 | -0.7084 | 0.9069 | 0.4399 | 0.0312  | 0.0526 | 0.5569 | 43.0850 | 0.1638 | 13922.0974 |
| Stroke | g_Vibrio                  | Weighted mode             | 37 | -0.7331 | 0.8228 | 0.3789 | 0.0312  | 0.0526 | 0.5569 | 43.0850 | 0.1638 | 13922.0974 |
| Stroke | log_f_Aeromonadaceae      | MR Egger                  | 37 | -0.1488 | 0.7982 | 0.8532 | 0.0008  | 0.0476 | 0.9863 | 41.1629 | 0.2189 | 9.6010     |
| Stroke | log_f_Aeromonadaceae      | Weighted median           | 37 | 0.3362  | 0.3724 | 0.3666 | 0.0008  | 0.0476 | 0.9863 | 41.1629 | 0.2189 | 9.6010     |
| Stroke | log_f_Aeromonadaceae      | Inverse variance weighted | 37 | -0.1358 | 0.2570 | 0.5973 | 0.0008  | 0.0476 | 0.9863 | 41.1629 | 0.2189 | 9.6010     |
| Stroke | log_f_Aeromonadaceae      | Simple mode               | 37 | 0.9892  | 0.8024 | 0.2257 | 0.0008  | 0.0476 | 0.9863 | 41.1629 | 0.2189 | 9.6010     |
| Stroke | log_f_Aeromonadaceae      | Weighted mode             | 37 | 1.0090  | 0.8122 | 0.2221 | 0.0008  | 0.0476 | 0.9863 | 41.1629 | 0.2189 | 9.6010     |
| Stroke | log_f_Alcaligenaceae      | MR Egger                  | 37 | -0.8688 | 0.7457 | 0.2518 | 0.0585  | 0.0444 | 0.1958 | 32.6107 | 0.6306 | 11.1231    |
| Stroke | log_f_Alcaligenaceae      | Weighted median           | 37 | -0.1018 | 0.3527 | 0.7728 | 0.0585  | 0.0444 | 0.1958 | 32.6107 | 0.6306 | 11.1231    |
| Stroke | log_f_Alcaligenaceae      | Inverse variance weighted | 37 | 0.0618  | 0.2408 | 0.7973 | 0.0585  | 0.0444 | 0.1958 | 32.6107 | 0.6306 | 11.1231    |
| Stroke | log_f_Alcaligenaceae      | Simple mode               | 37 | -0.4875 | 0.7835 | 0.5378 | 0.0585  | 0.0444 | 0.1958 | 32.6107 | 0.6306 | 11.1231    |
| Stroke | log_f_Alcaligenaceae      | Weighted mode             | 37 | -0.5445 | 0.7829 | 0.4912 | 0.0585  | 0.0444 | 0.1958 | 32.6107 | 0.6306 | 11.1231    |
| Stroke | log_f_Brachyspiraceae     | MR Egger                  | 37 | 1.0477  | 0.7442 | 0.1680 | -0.0596 | 0.0444 | 0.1885 | 27.5294 | 0.8435 | 4.6224     |
| Stroke | log_f_Brachyspiraceae     | Weighted median           | 37 | 0.1436  | 0.3539 | 0.6850 | -0.0596 | 0.0444 | 0.1885 | 27.5294 | 0.8435 | 4.6224     |
| Stroke | log_f_Brachyspiraceae     | Inverse variance weighted | 37 | 0.1047  | 0.2437 | 0.6675 | -0.0596 | 0.0444 | 0.1885 | 27.5294 | 0.8435 | 4.6224     |
| Stroke | log_f_Brachyspiraceae     | Simple mode               | 37 | 0.2129  | 0.7182 | 0.7686 | -0.0596 | 0.0444 | 0.1885 | 27.5294 | 0.8435 | 4.6224     |
| Stroke | log_f_Brachyspiraceae     | Weighted mode             | 37 | 0.2696  | 0.6113 | 0.6619 | -0.0596 | 0.0444 | 0.1885 | 27.5294 | 0.8435 | 4.6224     |
| Stroke | log_f_Comamonadaceae      | MR Egger                  | 37 | -0.2609 | 0.8800 | 0.7686 | 0.0189  | 0.0525 | 0.7216 | 50.0403 | 0.0477 | 19.3970    |
| Stroke | log_f_Comamonadaceae      | Weighted median           | 37 | -0.1081 | 0.3703 | 0.7704 | 0.0189  | 0.0525 | 0.7216 | 50.0403 | 0.0477 | 19.3970    |
| Stroke | log_f_Comamonadaceae      | Inverse variance weighted | 37 | 0.0379  | 0.2839 | 0.8937 | 0.0189  | 0.0525 | 0.7216 | 50.0403 | 0.0477 | 19.3970    |
| Stroke | log_f_Comamonadaceae      | Simple mode               | 37 | -0.0031 | 0.7662 | 0.9968 | 0.0189  | 0.0525 | 0.7216 | 50.0403 | 0.0477 | 19.3970    |
| Stroke | log_f_Comamonadaceae      | Weighted mode             | 37 | -0.1000 | 0.6419 | 0.8771 | 0.0189  | 0.0525 | 0.7216 | 50.0403 | 0.0477 | 19.3970    |
| Stroke | log_f_Moraxellaceae       | MR Egger                  | 37 | -1.4168 | 0.7440 | 0.0651 | 0.0742  | 0.0443 | 0.1028 | 33.7199 | 0.5775 | 20.2194    |
| Stroke | log_f_Moraxellaceae       | Weighted median           | 37 | -0.2420 | 0.3521 | 0.4919 | 0.0742  | 0.0443 | 0.1028 | 33.7199 | 0.5775 | 20.2194    |
| Stroke | log_f_Moraxellaceae       | Inverse variance weighted | 37 | -0.2375 | 0.2407 | 0.3238 | 0.0742  | 0.0443 | 0.1028 | 33.7199 | 0.5775 | 20.2194    |
| Stroke | log_f_Moraxellaceae       | Simple mode               | 37 | -0.9499 | 0.7756 | 0.2286 | 0.0742  | 0.0443 | 0.1028 | 33.7199 | 0.5775 | 20.2194    |
| Stroke | log_f_Moraxellaceae       | Weighted mode             | 37 | -0.7689 | 0.7377 | 0.3042 | 0.0742  | 0.0443 | 0.1028 | 33.7199 | 0.5775 | 20.2194    |
| Stroke | log_f_Paenibacillaceae    | MR Egger                  | 37 | 0.7081  | 0.7416 | 0.3462 | -0.0517 | 0.0443 | 0.2508 | 24.6350 | 0.9241 | 1.1880     |
| Stroke | log_f_Paenibacillaceae    | Weighted median           | 37 | 0.2261  | 0.3469 | 0.5146 | -0.0517 | 0.0443 | 0.2508 | 24.6350 | 0.9241 | 1.1880     |
| Stroke | log_f_Paenibacillaceae    | Inverse variance weighted | 37 | -0.1102 | 0.2426 | 0.6497 | -0.0517 | 0.0443 | 0.2508 | 24.6350 | 0.9241 | 1.1880     |
| Stroke | log_f_Paenibacillaceae    | Simple mode               | 37 | 0.6498  | 0.7311 | 0.3800 | -0.0517 | 0.0443 | 0.2508 | 24.6350 | 0.9241 | 1.1880     |
| Stroke | log_f_Paenibacillaceae    | Weighted mode             | 37 | 0.5397  | 0.5977 | 0.3726 | -0.0517 | 0.0443 | 0.2508 | 24.6350 | 0.9241 | 1.1880     |
| Stroke | log_f_Peptococcaceae      | MR Egger                  | 37 | 0.2563  | 0.7391 | 0.7308 | -0.0247 | 0.0441 | 0.5795 | 30.7529 | 0.6733 | 19.4870    |
| Stroke | log_f_Peptococcaceae      | Weighted median           | 37 | 0.0423  | 0.3376 | 0.9002 | -0.0247 | 0.0441 | 0.5795 | 30.7529 | 0.6733 | 19.4870    |
| Stroke | log_f_Peptococcaceae      | Inverse variance weighted | 37 | -0.1345 | 0.2413 | 0.5773 | -0.0247 | 0.0441 | 0.5795 | 30.7529 | 0.6733 | 19.4870    |
| Stroke | log_f_Peptococcaceae      | Simple mode               | 37 | -0.0664 | 0.6377 | 0.9176 | -0.0247 | 0.0441 | 0.5795 | 30.7529 | 0.6733 | 19.4870    |
| Stroke | log_f_Peptococcaceae      | Weighted mode             | 37 | 0.0063  | 0.5719 | 0.9913 | -0.0247 | 0.0441 | 0.5795 | 30.7529 | 0.6733 | 19.4870    |
| Stroke | log_f_Pseudomonadaceae    | MR Egger                  | 37 | -0.9799 | 0.8742 | 0.2700 | 0.0688  | 0.0520 | 0.1946 | 50.3873 | 0.0562 | 192.9644   |
| Stroke | log_f_Pseudomonadaceae    | Weighted median           | 37 | 0.1448  | 0.3747 | 0.6992 | 0.0688  | 0.0520 | 0.1946 | 50.3873 | 0.0562 | 192.9644   |
| Stroke | log_f_Pseudomonadaceae    | Inverse variance weighted | 37 | 0.1139  | 0.2859 | 0.6904 | 0.0688  | 0.0520 | 0.1946 | 50.3873 | 0.0562 | 192.9644   |
| Stroke | log_f_Pseudomonadaceae    | Simple mode               | 37 | -0.3185 | 0.8070 | 0.6954 | 0.0688  | 0.0520 | 0.1946 | 50.3873 | 0.0562 | 192.9644   |
| Stroke | log_f_Pseudomonadaceae    | Weighted mode             | 37 | -0.2173 | 0.8115 | 0.7904 | 0.0688  | 0.0520 | 0.1946 | 50.3873 | 0.0562 | 192.9644   |
| Stroke | log_f_Rhodocyclaceae      | MR Egger                  | 37 | -0.3763 | 0.7371 | 0.6129 | 0.0082  | 0.0440 | 0.8522 | 29.1037 | 0.7479 | 3.0052     |
| Stroke | log_f_Rhodocyclaceae      | Weighted median           | 37 | -0.2836 | 0.3343 | 0.3962 | 0.0082  | 0.0440 | 0.8522 | 29.1037 | 0.7479 | 3.0052     |
| Stroke | log_f_Rhodocyclaceae      | Inverse variance weighted | 37 | -0.2456 | 0.2406 | 0.3074 | 0.0082  | 0.0440 | 0.8522 | 29.1037 | 0.7479 | 3.0052     |
| Stroke | log_f_Rhodocyclaceae      | Simple mode               | 37 | -0.6254 | 0.6755 | 0.3607 | 0.0082  | 0.0440 | 0.8522 | 29.1037 | 0.7479 | 3.0052     |
| Stroke | log_f_Rhodocyclaceae      | Weighted mode             | 37 | -0.3567 | 0.5475 | 0.5189 | 0.0082  | 0.0440 | 0.8522 | 29.1037 | 0.7479 | 3.0052     |
| Stroke | log_f_Succinivibrionaceae | MR Egger                  | 37 | -0.6256 | 0.7633 | 0.4180 | 0.0487  | 0.0455 | 0.2922 | 38.8373 | 0.3431 | 3.6999     |

|        |                               |                           |    |         |        |        |         |        |        |         |        |           |
|--------|-------------------------------|---------------------------|----|---------|--------|--------|---------|--------|--------|---------|--------|-----------|
| Stroke | log_f_Succinivibrionaceae     | Weighted median           | 37 | 0.2173  | 0.3493 | 0.5340 | 0.0487  | 0.0455 | 0.2922 | 38.8373 | 0.3431 | 3.6999    |
| Stroke | log_f_Succinivibrionaceae     | Inverse variance weighted | 37 | 0.1462  | 0.2493 | 0.5576 | 0.0487  | 0.0455 | 0.2922 | 38.8373 | 0.3431 | 3.6999    |
| Stroke | log_f_Succinivibrionaceae     | Simple mode               | 37 | 0.3763  | 0.7348 | 0.6117 | 0.0487  | 0.0455 | 0.2922 | 38.8373 | 0.3431 | 3.6999    |
| Stroke | log_f_Succinivibrionaceae     | Weighted mode             | 37 | 0.5499  | 0.6524 | 0.4048 | 0.0487  | 0.0455 | 0.2922 | 38.8373 | 0.3431 | 3.6999    |
| Stroke | log_f_Thermoanaerobacteraceae | MR Egger                  | 37 | 0.9972  | 0.7565 | 0.1960 | -0.0452 | 0.0451 | 0.3229 | 36.8481 | 0.4295 | 7.7009    |
| Stroke | log_f_Thermoanaerobacteraceae | Weighted median           | 37 | 0.1186  | 0.3527 | 0.7367 | -0.0452 | 0.0451 | 0.3229 | 36.8481 | 0.4295 | 7.7009    |
| Stroke | log_f_Thermoanaerobacteraceae | Inverse variance weighted | 37 | 0.2802  | 0.2471 | 0.2569 | -0.0452 | 0.0451 | 0.3229 | 36.8481 | 0.4295 | 7.7009    |
| Stroke | log_f_Thermoanaerobacteraceae | Simple mode               | 37 | -0.0511 | 0.7126 | 0.9432 | -0.0452 | 0.0451 | 0.3229 | 36.8481 | 0.4295 | 7.7009    |
| Stroke | log_f_Thermoanaerobacteraceae | Weighted mode             | 37 | -0.0059 | 0.6513 | 0.9929 | -0.0452 | 0.0451 | 0.3229 | 36.8481 | 0.4295 | 7.7009    |
| Stroke | log_g_Acetivibrio             | MR Egger                  | 37 | 1.6325  | 0.7439 | 0.0349 | -0.0925 | 0.0444 | 0.0443 | 35.4416 | 0.4950 | 18.0573   |
| Stroke | log_g_Acetivibrio             | Weighted median           | 37 | 0.4622  | 0.3491 | 0.1855 | -0.0925 | 0.0444 | 0.0443 | 35.4416 | 0.4950 | 18.0573   |
| Stroke | log_g_Acetivibrio             | Inverse variance weighted | 37 | 0.1657  | 0.2427 | 0.4948 | -0.0925 | 0.0444 | 0.0443 | 35.4416 | 0.4950 | 18.0573   |
| Stroke | log_g_Acetivibrio             | Simple mode               | 37 | 0.7703  | 0.6733 | 0.2602 | -0.0925 | 0.0444 | 0.0443 | 35.4416 | 0.4950 | 18.0573   |
| Stroke | log_g_Acetivibrio             | Weighted mode             | 37 | 0.7466  | 0.5764 | 0.2034 | -0.0925 | 0.0444 | 0.0443 | 35.4416 | 0.4950 | 18.0573   |
| Stroke | log_g_Achromobacter           | MR Egger                  | 37 | -1.2125 | 0.8145 | 0.1455 | 0.0762  | 0.0485 | 0.1251 | 44.4756 | 0.1570 | 460.3135  |
| Stroke | log_g_Achromobacter           | Weighted median           | 37 | 0.5001  | 0.3691 | 0.1755 | 0.0762  | 0.0485 | 0.1251 | 44.4756 | 0.1570 | 460.3135  |
| Stroke | log_g_Achromobacter           | Inverse variance weighted | 37 | -0.0011 | 0.2684 | 0.9968 | 0.0762  | 0.0485 | 0.1251 | 44.4756 | 0.1570 | 460.3135  |
| Stroke | log_g_Achromobacter           | Simple mode               | 37 | 0.6145  | 0.6873 | 0.3772 | 0.0762  | 0.0485 | 0.1251 | 44.4756 | 0.1570 | 460.3135  |
| Stroke | log_g_Achromobacter           | Weighted mode             | 37 | 0.6594  | 0.7015 | 0.3535 | 0.0762  | 0.0485 | 0.1251 | 44.4756 | 0.1570 | 460.3135  |
| Stroke | log_g_Acidovorax              | MR Egger                  | 37 | -0.5873 | 0.7714 | 0.4516 | 0.0294  | 0.0460 | 0.5272 | 38.6503 | 0.3081 | 29.2820   |
| Stroke | log_g_Acidovorax              | Weighted median           | 37 | -0.0176 | 0.3785 | 0.9628 | 0.0294  | 0.0460 | 0.5272 | 38.6503 | 0.3081 | 29.2820   |
| Stroke | log_g_Acidovorax              | Inverse variance weighted | 37 | -0.1215 | 0.2492 | 0.6259 | 0.0294  | 0.0460 | 0.5272 | 38.6503 | 0.3081 | 29.2820   |
| Stroke | log_g_Acidovorax              | Simple mode               | 37 | 0.2705  | 0.7868 | 0.7330 | 0.0294  | 0.0460 | 0.5272 | 38.6503 | 0.3081 | 29.2820   |
| Stroke | log_g_Acidovorax              | Weighted mode             | 37 | 0.1384  | 0.7230 | 0.8493 | 0.0294  | 0.0460 | 0.5272 | 38.6503 | 0.3081 | 29.2820   |
| Stroke | log_g_Actinobacillus          | MR Egger                  | 37 | 0.0103  | 0.7388 | 0.9890 | -0.0084 | 0.0441 | 0.8494 | 27.3780 | 0.8175 | 80.0717   |
| Stroke | log_g_Actinobacillus          | Weighted median           | 37 | 0.1125  | 0.3551 | 0.7515 | -0.0084 | 0.0441 | 0.8494 | 27.3780 | 0.8175 | 80.0717   |
| Stroke | log_g_Actinobacillus          | Inverse variance weighted | 37 | -0.1233 | 0.2413 | 0.6094 | -0.0084 | 0.0441 | 0.8494 | 27.3780 | 0.8175 | 80.0717   |
| Stroke | log_g_Actinobacillus          | Simple mode               | 37 | 0.0382  | 0.7005 | 0.9568 | -0.0084 | 0.0441 | 0.8494 | 27.3780 | 0.8175 | 80.0717   |
| Stroke | log_g_Actinobacillus          | Weighted mode             | 37 | 0.1386  | 0.5602 | 0.8060 | -0.0084 | 0.0441 | 0.8494 | 27.3780 | 0.8175 | 80.0717   |
| Stroke | log_g_Alkaliphilus            | MR Egger                  | 37 | -0.1765 | 0.7425 | 0.8135 | 0.0240  | 0.0443 | 0.5914 | 23.8320 | 0.9235 | 3.0227    |
| Stroke | log_g_Alkaliphilus            | Weighted median           | 37 | 0.3028  | 0.3551 | 0.3938 | 0.0240  | 0.0443 | 0.5914 | 23.8320 | 0.9235 | 3.0227    |
| Stroke | log_g_Alkaliphilus            | Inverse variance weighted | 37 | 0.2038  | 0.2423 | 0.4003 | 0.0240  | 0.0443 | 0.5914 | 23.8320 | 0.9235 | 3.0227    |
| Stroke | log_g_Alkaliphilus            | Simple mode               | 37 | 0.7884  | 0.6820 | 0.2553 | 0.0240  | 0.0443 | 0.5914 | 23.8320 | 0.9235 | 3.0227    |
| Stroke | log_g_Alkaliphilus            | Weighted mode             | 37 | 0.5803  | 0.5734 | 0.3183 | 0.0240  | 0.0443 | 0.5914 | 23.8320 | 0.9235 | 3.0227    |
| Stroke | log_g_Cellulosilyticum        | MR Egger                  | 37 | -0.5641 | 0.8792 | 0.5253 | 0.0552  | 0.0524 | 0.2997 | 51.4876 | 0.0455 | 14.9468   |
| Stroke | log_g_Cellulosilyticum        | Weighted median           | 37 | 0.4477  | 0.3788 | 0.2373 | 0.0552  | 0.0524 | 0.2997 | 51.4876 | 0.0455 | 14.9468   |
| Stroke | log_g_Cellulosilyticum        | Inverse variance weighted | 37 | 0.3111  | 0.2864 | 0.2774 | 0.0552  | 0.0524 | 0.2997 | 51.4876 | 0.0455 | 14.9468   |
| Stroke | log_g_Cellulosilyticum        | Simple mode               | 37 | 0.6256  | 0.7567 | 0.4139 | 0.0552  | 0.0524 | 0.2997 | 51.4876 | 0.0455 | 14.9468   |
| Stroke | log_g_Cellulosilyticum        | Weighted mode             | 37 | 0.3666  | 0.6622 | 0.5832 | 0.0552  | 0.0524 | 0.2997 | 51.4876 | 0.0455 | 14.9468   |
| Stroke | log_g_Cronobacter             | MR Egger                  | 37 | -0.0316 | 0.9000 | 0.9722 | 0.0075  | 0.0537 | 0.8898 | 52.4019 | 0.0296 | -697.5670 |
| Stroke | log_g_Cronobacter             | Weighted median           | 37 | 0.0534  | 0.3534 | 0.8798 | 0.0075  | 0.0537 | 0.8898 | 52.4019 | 0.0296 | -697.5670 |
| Stroke | log_g_Cronobacter             | Inverse variance weighted | 37 | 0.0871  | 0.2895 | 0.7635 | 0.0075  | 0.0537 | 0.8898 | 52.4019 | 0.0296 | -697.5670 |
| Stroke | log_g_Cronobacter             | Simple mode               | 37 | 0.1027  | 0.6666 | 0.8784 | 0.0075  | 0.0537 | 0.8898 | 52.4019 | 0.0296 | -697.5670 |
| Stroke | log_g_Cronobacter             | Weighted mode             | 37 | 0.1027  | 0.5561 | 0.8545 | 0.0075  | 0.0537 | 0.8898 | 52.4019 | 0.0296 | -697.5670 |
| Stroke | log_g_Dickeya                 | MR Egger                  | 37 | -0.2529 | 0.9411 | 0.7897 | 0.0132  | 0.0561 | 0.8154 | 57.1348 | 0.0105 | 8.5983    |
| Stroke | log_g_Dickeya                 | Weighted median           | 37 | -0.6447 | 0.3818 | 0.0913 | 0.0132  | 0.0561 | 0.8154 | 57.1348 | 0.0105 | 8.5983    |
| Stroke | log_g_Dickeya                 | Inverse variance weighted | 37 | -0.0435 | 0.3023 | 0.8855 | 0.0132  | 0.0561 | 0.8154 | 57.1348 | 0.0105 | 8.5983    |
| Stroke | log_g_Dickeya                 | Simple mode               | 37 | -0.6360 | 0.7562 | 0.4059 | 0.0132  | 0.0561 | 0.8154 | 57.1348 | 0.0105 | 8.5983    |
| Stroke | log_g_Dickeya                 | Weighted mode             | 37 | -0.8018 | 0.5755 | 0.1721 | 0.0132  | 0.0561 | 0.8154 | 57.1348 | 0.0105 | 8.5983    |
| Stroke | log_g_Dysgonomonas            | MR Egger                  | 37 | -0.1093 | 0.7368 | 0.8830 | 0.0021  | 0.0439 | 0.9625 | 29.4054 | 0.7347 | 123.6273  |
| Stroke | log_g_Dysgonomonas            | Weighted median           | 37 | -0.1302 | 0.3247 | 0.6884 | 0.0021  | 0.0439 | 0.9625 | 29.4054 | 0.7347 | 123.6273  |
| Stroke | log_g_Dysgonomonas            | Inverse variance weighted | 37 | -0.0762 | 0.2406 | 0.7513 | 0.0021  | 0.0439 | 0.9625 | 29.4054 | 0.7347 | 123.6273  |
| Stroke | log_g_Dysgonomonas            | Simple mode               | 37 | -0.2513 | 0.6327 | 0.6935 | 0.0021  | 0.0439 | 0.9625 | 29.4054 | 0.7347 | 123.6273  |
| Stroke | log_g_Dysgonomonas            | Weighted mode             | 37 | -0.2745 | 0.5137 | 0.5964 | 0.0021  | 0.0439 | 0.9625 | 29.4054 | 0.7347 | 123.6273  |
| Stroke | log_g_Edwarsiella             | MR Egger                  | 37 | -0.3828 | 0.9492 | 0.6892 | 0.0323  | 0.0565 | 0.5710 | 57.1545 | 0.0104 | 46.8687   |
| Stroke | log_g_Edwarsiella             | Weighted median           | 37 | -0.0020 | 0.3833 | 0.9959 | 0.0323  | 0.0565 | 0.5710 | 57.1545 | 0.0104 | 46.8687   |
| Stroke | log_g_Edwarsiella             | Inverse variance weighted | 37 | 0.1308  | 0.3045 | 0.6675 | 0.0323  | 0.0565 | 0.5710 | 57.1545 | 0.0104 | 46.8687   |
| Stroke | log_g_Edwarsiella             | Simple mode               | 37 | -0.0109 | 0.8885 | 0.9903 | 0.0323  | 0.0565 | 0.5710 | 57.1545 | 0.0104 | 46.8687   |
| Stroke | log_g_Edwarsiella             | Weighted mode             | 37 | -0.0842 | 0.9249 | 0.9280 | 0.0323  | 0.0565 | 0.5710 | 57.1545 | 0.0104 | 46.8687   |
| Stroke | log_g_Epulopiscium            | MR Egger                  | 37 | 0.9072  | 0.8549 | 0.2959 | -0.0524 | 0.0510 | 0.3109 | 48.1211 | 0.0853 | 46.0679   |
| Stroke | log_g_Epulopiscium            | Weighted median           | 37 | -0.0730 | 0.3649 | 0.8414 | -0.0524 | 0.0510 | 0.3109 | 48.1211 | 0.0853 | 46.0679   |

|        |                       |                           |    |         |        |        |         |        |        |         |        |           |
|--------|-----------------------|---------------------------|----|---------|--------|--------|---------|--------|--------|---------|--------|-----------|
| Stroke | log_g_Epulopiscium    | Inverse variance weighted | 37 | 0.0765  | 0.2795 | 0.7844 | -0.0524 | 0.0510 | 0.3109 | 48.1211 | 0.0853 | 46.0679   |
| Stroke | log_g_Epulopiscium    | Simple mode               | 37 | 0.0474  | 0.6766 | 0.9445 | -0.0524 | 0.0510 | 0.3109 | 48.1211 | 0.0853 | 46.0679   |
| Stroke | log_g_Epulopiscium    | Weighted mode             | 37 | 0.0209  | 0.5750 | 0.9712 | -0.0524 | 0.0510 | 0.3109 | 48.1211 | 0.0853 | 46.0679   |
| Stroke | log_g_Eremococcus     | MR Egger                  | 37 | 0.8882  | 0.7336 | 0.2341 | -0.0464 | 0.0438 | 0.2964 | 23.9919 | 0.9372 | 1.8895    |
| Stroke | log_g_Eremococcus     | Weighted median           | 37 | 0.4200  | 0.3308 | 0.2043 | -0.0464 | 0.0438 | 0.2964 | 23.9919 | 0.9372 | 1.8895    |
| Stroke | log_g_Eremococcus     | Inverse variance weighted | 37 | 0.1533  | 0.2395 | 0.5223 | -0.0464 | 0.0438 | 0.2964 | 23.9919 | 0.9372 | 1.8895    |
| Stroke | log_g_Eremococcus     | Simple mode               | 37 | 0.7588  | 0.6151 | 0.2253 | -0.0464 | 0.0438 | 0.2964 | 23.9919 | 0.9372 | 1.8895    |
| Stroke | log_g_Eremococcus     | Weighted mode             | 37 | 0.4971  | 0.5516 | 0.3734 | -0.0464 | 0.0438 | 0.2964 | 23.9919 | 0.9372 | 1.8895    |
| Stroke | log_g_Erwinia         | MR Egger                  | 37 | -0.5840 | 0.7388 | 0.4346 | 0.0474  | 0.0440 | 0.2888 | 24.8556 | 0.9192 | 56.8978   |
| Stroke | log_g_Erwinia         | Weighted median           | 37 | 0.3457  | 0.3398 | 0.3090 | 0.0474  | 0.0440 | 0.2888 | 24.8556 | 0.9192 | 56.8978   |
| Stroke | log_g_Erwinia         | Inverse variance weighted | 37 | 0.1684  | 0.2407 | 0.4842 | 0.0474  | 0.0440 | 0.2888 | 24.8556 | 0.9192 | 56.8978   |
| Stroke | log_g_Erwinia         | Simple mode               | 37 | 0.6616  | 0.6613 | 0.3238 | 0.0474  | 0.0440 | 0.2888 | 24.8556 | 0.9192 | 56.8978   |
| Stroke | log_g_Erwinia         | Weighted mode             | 37 | 0.5990  | 0.6287 | 0.3471 | 0.0474  | 0.0440 | 0.2888 | 24.8556 | 0.9192 | 56.8978   |
| Stroke | log_g_Ethanoligenens  | MR Egger                  | 37 | 1.1996  | 0.7441 | 0.1159 | -0.0616 | 0.0444 | 0.1743 | 18.9258 | 0.9914 | 2.0085    |
| Stroke | log_g_Ethanoligenens  | Weighted median           | 37 | 0.3505  | 0.3405 | 0.3033 | -0.0616 | 0.0444 | 0.1743 | 18.9258 | 0.9914 | 2.0085    |
| Stroke | log_g_Ethanoligenens  | Inverse variance weighted | 37 | 0.2246  | 0.2434 | 0.3563 | -0.0616 | 0.0444 | 0.1743 | 18.9258 | 0.9914 | 2.0085    |
| Stroke | log_g_Ethanoligenens  | Simple mode               | 37 | 0.4905  | 0.6846 | 0.4783 | -0.0616 | 0.0444 | 0.1743 | 18.9258 | 0.9914 | 2.0085    |
| Stroke | log_g_Ethanoligenens  | Weighted mode             | 37 | 0.5487  | 0.5941 | 0.3618 | -0.0616 | 0.0444 | 0.1743 | 18.9258 | 0.9914 | 2.0085    |
| Stroke | log_g_Filifactor      | MR Egger                  | 37 | 1.2535  | 0.7786 | 0.1164 | -0.0385 | 0.0464 | 0.4124 | 39.1395 | 0.2893 | 26.0173   |
| Stroke | log_g_Filifactor      | Weighted median           | 37 | 0.5373  | 0.3512 | 0.1260 | -0.0385 | 0.0464 | 0.4124 | 39.1395 | 0.2893 | 26.0173   |
| Stroke | log_g_Filifactor      | Inverse variance weighted | 37 | 0.6429  | 0.2527 | 0.0110 | -0.0385 | 0.0464 | 0.4124 | 39.1395 | 0.2893 | 26.0173   |
| Stroke | log_g_Filifactor      | Simple mode               | 37 | 0.8067  | 0.7169 | 0.2679 | -0.0385 | 0.0464 | 0.4124 | 39.1395 | 0.2893 | 26.0173   |
| Stroke | log_g_Filifactor      | Weighted mode             | 37 | 0.5735  | 0.5762 | 0.3263 | -0.0385 | 0.0464 | 0.4124 | 39.1395 | 0.2893 | 26.0173   |
| Stroke | log_g_Finegoldia      | MR Egger                  | 37 | 1.0919  | 0.8128 | 0.1878 | -0.0443 | 0.0485 | 0.3669 | 41.7819 | 0.1999 | -137.6538 |
| Stroke | log_g_Finegoldia      | Weighted median           | 37 | 0.3994  | 0.3573 | 0.2636 | -0.0443 | 0.0485 | 0.3669 | 41.7819 | 0.1999 | -137.6538 |
| Stroke | log_g_Finegoldia      | Inverse variance weighted | 37 | 0.3897  | 0.2648 | 0.1411 | -0.0443 | 0.0485 | 0.3669 | 41.7819 | 0.1999 | -137.6538 |
| Stroke | log_g_Finegoldia      | Simple mode               | 37 | 0.2030  | 0.7366 | 0.7845 | -0.0443 | 0.0485 | 0.3669 | 41.7819 | 0.1999 | -137.6538 |
| Stroke | log_g_Finegoldia      | Weighted mode             | 37 | 0.2953  | 0.6063 | 0.6292 | -0.0443 | 0.0485 | 0.3669 | 41.7819 | 0.1999 | -137.6538 |
| Stroke | log_g_Gardnerella     | MR Egger                  | 37 | -0.5495 | 0.7728 | 0.4818 | 0.0353  | 0.0461 | 0.4487 | 36.8107 | 0.3850 | 15.5860   |
| Stroke | log_g_Gardnerella     | Weighted median           | 37 | 0.0986  | 0.3540 | 0.7806 | 0.0353  | 0.0461 | 0.4487 | 36.8107 | 0.3850 | 15.5860   |
| Stroke | log_g_Gardnerella     | Inverse variance weighted | 37 | 0.0102  | 0.2506 | 0.9675 | 0.0353  | 0.0461 | 0.4487 | 36.8107 | 0.3850 | 15.5860   |
| Stroke | log_g_Gardnerella     | Simple mode               | 37 | 0.2630  | 0.7579 | 0.7306 | 0.0353  | 0.0461 | 0.4487 | 36.8107 | 0.3850 | 15.5860   |
| Stroke | log_g_Gardnerella     | Weighted mode             | 37 | -0.0407 | 0.6108 | 0.9472 | 0.0353  | 0.0461 | 0.4487 | 36.8107 | 0.3850 | 15.5860   |
| Stroke | log_g_Helicobacter    | MR Egger                  | 37 | -0.2637 | 0.7446 | 0.7253 | 0.0452  | 0.0444 | 0.3163 | 30.1642 | 0.7419 | 3.8657    |
| Stroke | log_g_Helicobacter    | Weighted median           | 37 | 0.1932  | 0.3557 | 0.5870 | 0.0452  | 0.0444 | 0.3163 | 30.1642 | 0.7419 | 3.8657    |
| Stroke | log_g_Helicobacter    | Inverse variance weighted | 37 | 0.4515  | 0.2436 | 0.0639 | 0.0452  | 0.0444 | 0.3163 | 30.1642 | 0.7419 | 3.8657    |
| Stroke | log_g_Helicobacter    | Simple mode               | 37 | 0.1176  | 0.7844 | 0.8817 | 0.0452  | 0.0444 | 0.3163 | 30.1642 | 0.7419 | 3.8657    |
| Stroke | log_g_Helicobacter    | Weighted mode             | 37 | -0.1935 | 0.6466 | 0.7664 | 0.0452  | 0.0444 | 0.3163 | 30.1642 | 0.7419 | 3.8657    |
| Stroke | log_g_Histophilus     | MR Egger                  | 37 | -1.0188 | 0.7883 | 0.2047 | 0.0570  | 0.0469 | 0.2322 | 40.2789 | 0.2865 | 184.9935  |
| Stroke | log_g_Histophilus     | Weighted median           | 37 | 0.1002  | 0.3602 | 0.7808 | 0.0570  | 0.0469 | 0.2322 | 40.2789 | 0.2865 | 184.9935  |
| Stroke | log_g_Histophilus     | Inverse variance weighted | 37 | -0.1114 | 0.2555 | 0.6628 | 0.0570  | 0.0469 | 0.2322 | 40.2789 | 0.2865 | 184.9935  |
| Stroke | log_g_Histophilus     | Simple mode               | 37 | 0.5170  | 0.6862 | 0.4561 | 0.0570  | 0.0469 | 0.2322 | 40.2789 | 0.2865 | 184.9935  |
| Stroke | log_g_Histophilus     | Weighted mode             | 37 | 0.3911  | 0.6712 | 0.5638 | 0.0570  | 0.0469 | 0.2322 | 40.2789 | 0.2865 | 184.9935  |
| Stroke | log_g_Kingella        | MR Egger                  | 37 | 0.7244  | 0.7402 | 0.3344 | -0.0399 | 0.0441 | 0.3718 | 32.4627 | 0.5912 | 34.4193   |
| Stroke | log_g_Kingella        | Weighted median           | 37 | 0.0840  | 0.3471 | 0.8087 | -0.0399 | 0.0441 | 0.3718 | 32.4627 | 0.5912 | 34.4193   |
| Stroke | log_g_Kingella        | Inverse variance weighted | 37 | 0.0913  | 0.2408 | 0.7047 | -0.0399 | 0.0441 | 0.3718 | 32.4627 | 0.5912 | 34.4193   |
| Stroke | log_g_Kingella        | Simple mode               | 37 | 0.3634  | 0.7161 | 0.6149 | -0.0399 | 0.0441 | 0.3718 | 32.4627 | 0.5912 | 34.4193   |
| Stroke | log_g_Kingella        | Weighted mode             | 37 | 0.2278  | 0.6389 | 0.7236 | -0.0399 | 0.0441 | 0.3718 | 32.4627 | 0.5912 | 34.4193   |
| Stroke | log_g_Lawsonia        | MR Egger                  | 37 | 0.7121  | 0.7515 | 0.3498 | -0.0331 | 0.0448 | 0.4654 | 27.8825 | 0.7982 | 9.4282    |
| Stroke | log_g_Lawsonia        | Weighted median           | 37 | 0.3341  | 0.3498 | 0.3394 | -0.0331 | 0.0448 | 0.4654 | 27.8825 | 0.7982 | 9.4282    |
| Stroke | log_g_Lawsonia        | Inverse variance weighted | 37 | 0.1879  | 0.2455 | 0.4441 | -0.0331 | 0.0448 | 0.4654 | 27.8825 | 0.7982 | 9.4282    |
| Stroke | log_g_Lawsonia        | Simple mode               | 37 | 0.6175  | 0.7091 | 0.3896 | -0.0331 | 0.0448 | 0.4654 | 27.8825 | 0.7982 | 9.4282    |
| Stroke | log_g_Lawsonia        | Weighted mode             | 37 | 0.5595  | 0.6987 | 0.4285 | -0.0331 | 0.0448 | 0.4654 | 27.8825 | 0.7982 | 9.4282    |
| Stroke | log_g_Leuconostoc     | MR Egger                  | 37 | -0.3754 | 0.7494 | 0.6195 | 0.0244  | 0.0447 | 0.5885 | 28.4840 | 0.7740 | 7.2994    |
| Stroke | log_g_Leuconostoc     | Weighted median           | 37 | -0.1920 | 0.3463 | 0.5793 | 0.0244  | 0.0447 | 0.5885 | 28.4840 | 0.7740 | 7.2994    |
| Stroke | log_g_Leuconostoc     | Inverse variance weighted | 37 | 0.0115  | 0.2439 | 0.9625 | 0.0244  | 0.0447 | 0.5885 | 28.4840 | 0.7740 | 7.2994    |
| Stroke | log_g_Leuconostoc     | Simple mode               | 37 | -0.3716 | 0.7003 | 0.5989 | 0.0244  | 0.0447 | 0.5885 | 28.4840 | 0.7740 | 7.2994    |
| Stroke | log_g_Leuconostoc     | Weighted mode             | 37 | -0.5633 | 0.5720 | 0.3313 | 0.0244  | 0.0447 | 0.5885 | 28.4840 | 0.7740 | 7.2994    |
| Stroke | log_g_Methylobacillus | MR Egger                  | 37 | -1.8019 | 0.8458 | 0.0403 | 0.0904  | 0.0502 | 0.0807 | 47.9800 | 0.0874 | -96.9618  |
| Stroke | log_g_Methylobacillus | Weighted median           | 37 | 0.0086  | 0.3779 | 0.9819 | 0.0904  | 0.0502 | 0.0807 | 47.9800 | 0.0874 | -96.9618  |
| Stroke | log_g_Methylobacillus | Inverse variance weighted | 37 | -0.3610 | 0.2794 | 0.1964 | 0.0904  | 0.0502 | 0.0807 | 47.9800 | 0.0874 | -96.9618  |

|        |                         |                           |    |         |        |        |         |        |        |         |        |           |
|--------|-------------------------|---------------------------|----|---------|--------|--------|---------|--------|--------|---------|--------|-----------|
| Stroke | log_g_Methylobacillus   | Simple mode               | 37 | -0.0337 | 0.6727 | 0.9603 | 0.0904  | 0.0502 | 0.0807 | 47.9800 | 0.0874 | -96.9618  |
| Stroke | log_g_Methylobacillus   | Weighted mode             | 37 | -0.0107 | 0.7116 | 0.9881 | 0.0904  | 0.0502 | 0.0807 | 47.9800 | 0.0874 | -96.9618  |
| Stroke | log_g_Olsenella         | MR Egger                  | 37 | 0.8701  | 0.7442 | 0.2502 | -0.0270 | 0.0444 | 0.5464 | 28.6890 | 0.7655 | 5.2666    |
| Stroke | log_g_Olsenella         | Weighted median           | 37 | 0.2481  | 0.3381 | 0.4631 | -0.0270 | 0.0444 | 0.5464 | 28.6890 | 0.7655 | 5.2666    |
| Stroke | log_g_Olsenella         | Inverse variance weighted | 37 | 0.4417  | 0.2432 | 0.0693 | -0.0270 | 0.0444 | 0.5464 | 28.6890 | 0.7655 | 5.2666    |
| Stroke | log_g_Olsenella         | Simple mode               | 37 | 0.0124  | 0.6841 | 0.9856 | -0.0270 | 0.0444 | 0.5464 | 28.6890 | 0.7655 | 5.2666    |
| Stroke | log_g_Olsenella         | Weighted mode             | 37 | -0.0644 | 0.6068 | 0.9160 | -0.0270 | 0.0444 | 0.5464 | 28.6890 | 0.7655 | 5.2666    |
| Stroke | log_g_Ornithinibacillus | MR Egger                  | 37 | -0.0743 | 0.7629 | 0.9230 | 0.0107  | 0.0455 | 0.8156 | 36.8157 | 0.3848 | 10.0730   |
| Stroke | log_g_Ornithinibacillus | Weighted median           | 37 | -0.0321 | 0.3561 | 0.9282 | 0.0107  | 0.0455 | 0.8156 | 36.8157 | 0.3848 | 10.0730   |
| Stroke | log_g_Ornithinibacillus | Inverse variance weighted | 37 | 0.0952  | 0.2449 | 0.6976 | 0.0107  | 0.0455 | 0.8156 | 36.8157 | 0.3848 | 10.0730   |
| Stroke | log_g_Ornithinibacillus | Simple mode               | 37 | -0.1974 | 0.7055 | 0.7813 | 0.0107  | 0.0455 | 0.8156 | 36.8157 | 0.3848 | 10.0730   |
| Stroke | log_g_Ornithinibacillus | Weighted mode             | 37 | -0.0429 | 0.6547 | 0.9481 | 0.0107  | 0.0455 | 0.8156 | 36.8157 | 0.3848 | 10.0730   |
| Stroke | log_g_Paenibacillus     | MR Egger                  | 37 | 0.7751  | 0.7445 | 0.3049 | -0.0610 | 0.0444 | 0.1786 | 31.9401 | 0.6621 | 3.4081    |
| Stroke | log_g_Paenibacillus     | Weighted median           | 37 | -0.1423 | 0.3473 | 0.6819 | -0.0610 | 0.0444 | 0.1786 | 31.9401 | 0.6621 | 3.4081    |
| Stroke | log_g_Paenibacillus     | Inverse variance weighted | 37 | -0.1906 | 0.2434 | 0.4338 | -0.0610 | 0.0444 | 0.1786 | 31.9401 | 0.6621 | 3.4081    |
| Stroke | log_g_Paenibacillus     | Simple mode               | 37 | -0.5347 | 0.6893 | 0.4430 | -0.0610 | 0.0444 | 0.1786 | 31.9401 | 0.6621 | 3.4081    |
| Stroke | log_g_Paenibacillus     | Weighted mode             | 37 | -0.1533 | 0.5262 | 0.7725 | -0.0610 | 0.0444 | 0.1786 | 31.9401 | 0.6621 | 3.4081    |
| Stroke | log_g_Pantoea           | MR Egger                  | 37 | 0.2922  | 0.9227 | 0.7534 | -0.0225 | 0.0550 | 0.6853 | 54.6382 | 0.0184 | 96.7605   |
| Stroke | log_g_Pantoea           | Weighted median           | 37 | -0.0145 | 0.3580 | 0.9677 | -0.0225 | 0.0550 | 0.6853 | 54.6382 | 0.0184 | 96.7605   |
| Stroke | log_g_Pantoea           | Inverse variance weighted | 37 | -0.0642 | 0.2976 | 0.8293 | -0.0225 | 0.0550 | 0.6853 | 54.6382 | 0.0184 | 96.7605   |
| Stroke | log_g_Pantoea           | Simple mode               | 37 | 0.2236  | 0.6964 | 0.7500 | -0.0225 | 0.0550 | 0.6853 | 54.6382 | 0.0184 | 96.7605   |
| Stroke | log_g_Pantoea           | Weighted mode             | 37 | 0.0139  | 0.5779 | 0.9810 | -0.0225 | 0.0550 | 0.6853 | 54.6382 | 0.0184 | 96.7605   |
| Stroke | log_g_Pectobacterium    | MR Egger                  | 37 | -0.1124 | 0.9005 | 0.9014 | -0.0001 | 0.0537 | 0.9978 | 52.0620 | 0.0317 | 34.2526   |
| Stroke | log_g_Pectobacterium    | Weighted median           | 37 | 0.1239  | 0.3709 | 0.7384 | -0.0001 | 0.0537 | 0.9978 | 52.0620 | 0.0317 | 34.2526   |
| Stroke | log_g_Pectobacterium    | Inverse variance weighted | 37 | -0.1148 | 0.2888 | 0.6910 | -0.0001 | 0.0537 | 0.9978 | 52.0620 | 0.0317 | 34.2526   |
| Stroke | log_g_Pectobacterium    | Simple mode               | 37 | 0.9979  | 0.9252 | 0.2879 | -0.0001 | 0.0537 | 0.9978 | 52.0620 | 0.0317 | 34.2526   |
| Stroke | log_g_Pectobacterium    | Weighted mode             | 37 | 0.7170  | 0.7727 | 0.3596 | -0.0001 | 0.0537 | 0.9978 | 52.0620 | 0.0317 | 34.2526   |
| Stroke | log_g_Pseudoramibacter  | MR Egger                  | 37 | 1.4465  | 0.7453 | 0.0604 | -0.0931 | 0.0444 | 0.0434 | 26.5087 | 0.8759 | 2.3867    |
| Stroke | log_g_Pseudoramibacter  | Weighted median           | 37 | 0.0693  | 0.3584 | 0.8468 | -0.0931 | 0.0444 | 0.0434 | 26.5087 | 0.8759 | 2.3867    |
| Stroke | log_g_Pseudoramibacter  | Inverse variance weighted | 37 | -0.0302 | 0.2425 | 0.9008 | -0.0931 | 0.0444 | 0.0434 | 26.5087 | 0.8759 | 2.3867    |
| Stroke | log_g_Pseudoramibacter  | Simple mode               | 37 | 0.0388  | 0.7988 | 0.9615 | -0.0931 | 0.0444 | 0.0434 | 26.5087 | 0.8759 | 2.3867    |
| Stroke | log_g_Pseudoramibacter  | Weighted mode             | 37 | 0.1055  | 0.7425 | 0.8878 | -0.0931 | 0.0444 | 0.0434 | 26.5087 | 0.8759 | 2.3867    |
| Stroke | log_g_Rahnella          | MR Egger                  | 37 | 0.8900  | 0.8565 | 0.3059 | -0.0435 | 0.0510 | 0.3999 | 47.1449 | 0.0824 | 31.4816   |
| Stroke | log_g_Rahnella          | Weighted median           | 37 | 0.2840  | 0.3537 | 0.4219 | -0.0435 | 0.0510 | 0.3999 | 47.1449 | 0.0824 | 31.4816   |
| Stroke | log_g_Rahnella          | Inverse variance weighted | 37 | 0.1996  | 0.2773 | 0.4716 | -0.0435 | 0.0510 | 0.3999 | 47.1449 | 0.0824 | 31.4816   |
| Stroke | log_g_Rahnella          | Simple mode               | 37 | 0.3492  | 0.7517 | 0.6450 | -0.0435 | 0.0510 | 0.3999 | 47.1449 | 0.0824 | 31.4816   |
| Stroke | log_g_Rahnella          | Weighted mode             | 37 | 0.2243  | 0.7074 | 0.7530 | -0.0435 | 0.0510 | 0.3999 | 47.1449 | 0.0824 | 31.4816   |
| Stroke | log_g_Selenomonas       | MR Egger                  | 37 | -0.6943 | 0.7394 | 0.3541 | 0.0352  | 0.0440 | 0.4289 | 35.0434 | 0.4661 | 2530.1692 |
| Stroke | log_g_Selenomonas       | Weighted median           | 37 | 0.1101  | 0.3463 | 0.7506 | 0.0352  | 0.0440 | 0.4289 | 35.0434 | 0.4661 | 2530.1692 |
| Stroke | log_g_Selenomonas       | Inverse variance weighted | 37 | -0.1345 | 0.2395 | 0.5743 | 0.0352  | 0.0440 | 0.4289 | 35.0434 | 0.4661 | 2530.1692 |
| Stroke | log_g_Selenomonas       | Simple mode               | 37 | 0.0806  | 0.7924 | 0.9195 | 0.0352  | 0.0440 | 0.4289 | 35.0434 | 0.4661 | 2530.1692 |
| Stroke | log_g_Selenomonas       | Weighted mode             | 37 | 0.1461  | 0.7448 | 0.8456 | 0.0352  | 0.0440 | 0.4289 | 35.0434 | 0.4661 | 2530.1692 |
| Stroke | log_g_Serratia          | MR Egger                  | 37 | -1.2673 | 0.8038 | 0.1239 | 0.0718  | 0.0478 | 0.1422 | 43.5122 | 0.1820 | 82.6264   |
| Stroke | log_g_Serratia          | Weighted median           | 37 | 0.1470  | 0.3640 | 0.6864 | 0.0718  | 0.0478 | 0.1422 | 43.5122 | 0.1820 | 82.6264   |
| Stroke | log_g_Serratia          | Inverse variance weighted | 37 | -0.1252 | 0.2642 | 0.6356 | 0.0718  | 0.0478 | 0.1422 | 43.5122 | 0.1820 | 82.6264   |
| Stroke | log_g_Serratia          | Simple mode               | 37 | 0.1924  | 0.7435 | 0.7972 | 0.0718  | 0.0478 | 0.1422 | 43.5122 | 0.1820 | 82.6264   |
| Stroke | log_g_Serratia          | Weighted mode             | 37 | 0.3064  | 0.7692 | 0.6928 | 0.0718  | 0.0478 | 0.1422 | 43.5122 | 0.1820 | 82.6264   |
| Stroke | log_g_Shewanella        | MR Egger                  | 37 | -0.5152 | 0.8675 | 0.5564 | 0.0464  | 0.0517 | 0.3763 | 48.2008 | 0.0679 | 6.2435    |
| Stroke | log_g_Shewanella        | Weighted median           | 37 | -0.2723 | 0.3724 | 0.4647 | 0.0464  | 0.0517 | 0.3763 | 48.2008 | 0.0679 | 6.2435    |
| Stroke | log_g_Shewanella        | Inverse variance weighted | 37 | 0.2197  | 0.2821 | 0.4361 | 0.0464  | 0.0517 | 0.3763 | 48.2008 | 0.0679 | 6.2435    |
| Stroke | log_g_Shewanella        | Simple mode               | 37 | -0.5429 | 0.8096 | 0.5068 | 0.0464  | 0.0517 | 0.3763 | 48.2008 | 0.0679 | 6.2435    |
| Stroke | log_g_Shewanella        | Weighted mode             | 37 | -0.6133 | 0.6255 | 0.3333 | 0.0464  | 0.0517 | 0.3763 | 48.2008 | 0.0679 | 6.2435    |
| Stroke | log_g_Slackia           | MR Egger                  | 37 | 0.4754  | 0.7398 | 0.5247 | -0.0023 | 0.0441 | 0.9592 | 23.5678 | 0.9292 | 1.5397    |
| Stroke | log_g_Slackia           | Weighted median           | 37 | 0.4254  | 0.3420 | 0.2136 | -0.0023 | 0.0441 | 0.9592 | 23.5678 | 0.9292 | 1.5397    |
| Stroke | log_g_Slackia           | Inverse variance weighted | 37 | 0.4393  | 0.2418 | 0.0693 | -0.0023 | 0.0441 | 0.9592 | 23.5678 | 0.9292 | 1.5397    |
| Stroke | log_g_Slackia           | Simple mode               | 37 | 0.2750  | 0.6525 | 0.6759 | -0.0023 | 0.0441 | 0.9592 | 23.5678 | 0.9292 | 1.5397    |
| Stroke | log_g_Slackia           | Weighted mode             | 37 | 0.1517  | 0.5815 | 0.7957 | -0.0023 | 0.0441 | 0.9592 | 23.5678 | 0.9292 | 1.5397    |
| Stroke | log_g_Sodalis           | MR Egger                  | 37 | -0.4616 | 0.8267 | 0.5801 | 0.0286  | 0.0492 | 0.5644 | 43.0282 | 0.1653 | 24.8793   |
| Stroke | log_g_Sodalis           | Weighted median           | 37 | 0.3102  | 0.3591 | 0.3876 | 0.0286  | 0.0492 | 0.5644 | 43.0282 | 0.1653 | 24.8793   |
| Stroke | log_g_Sodalis           | Inverse variance weighted | 37 | -0.0065 | 0.2649 | 0.9805 | 0.0286  | 0.0492 | 0.5644 | 43.0282 | 0.1653 | 24.8793   |
| Stroke | log_g_Sodalis           | Simple mode               | 37 | 0.4327  | 0.7147 | 0.5487 | 0.0286  | 0.0492 | 0.5644 | 43.0282 | 0.1653 | 24.8793   |

|        |                              |                           |    |         |        |        |         |        |        |         |        |            |
|--------|------------------------------|---------------------------|----|---------|--------|--------|---------|--------|--------|---------|--------|------------|
| Stroke | log_g_Sodalis                | Weighted mode             | 37 | 0.5287  | 0.8319 | 0.5291 | 0.0286  | 0.0492 | 0.5644 | 43.0282 | 0.1653 | 24.8793    |
| Stroke | log_g_Thauera                | MR Egger                  | 37 | 0.0426  | 0.9157 | 0.9632 | 0.0136  | 0.0546 | 0.8042 | 54.3030 | 0.0197 | -7592.2933 |
| Stroke | log_g_Thauera                | Weighted median           | 37 | 0.0179  | 0.3640 | 0.9607 | 0.0136  | 0.0546 | 0.8042 | 54.3030 | 0.0197 | -7592.2933 |
| Stroke | log_g_Thauera                | Inverse variance weighted | 37 | 0.2589  | 0.2946 | 0.3795 | 0.0136  | 0.0546 | 0.8042 | 54.3030 | 0.0197 | -7592.2933 |
| Stroke | log_g_Thauera                | Simple mode               | 37 | 0.0723  | 0.7082 | 0.9193 | 0.0136  | 0.0546 | 0.8042 | 54.3030 | 0.0197 | -7592.2933 |
| Stroke | log_g_Thauera                | Weighted mode             | 37 | -0.2025 | 0.6394 | 0.7533 | 0.0136  | 0.0546 | 0.8042 | 54.3030 | 0.0197 | -7592.2933 |
| Stroke | log_g_Thermoanaerobacter     | MR Egger                  | 37 | 1.2310  | 0.8125 | 0.1387 | -0.0641 | 0.0485 | 0.1946 | 43.3429 | 0.1867 | 5.0170     |
| Stroke | log_g_Thermoanaerobacter     | Weighted median           | 37 | 0.4683  | 0.3665 | 0.2013 | -0.0641 | 0.0485 | 0.1946 | 43.3429 | 0.1867 | 5.0170     |
| Stroke | log_g_Thermoanaerobacter     | Inverse variance weighted | 37 | 0.2156  | 0.2685 | 0.4220 | -0.0641 | 0.0485 | 0.1946 | 43.3429 | 0.1867 | 5.0170     |
| Stroke | log_g_Thermoanaerobacter     | Simple mode               | 37 | 0.8518  | 0.7957 | 0.2915 | -0.0641 | 0.0485 | 0.1946 | 43.3429 | 0.1867 | 5.0170     |
| Stroke | log_g_Thermoanaerobacter     | Weighted mode             | 37 | 0.6518  | 0.6539 | 0.3255 | -0.0641 | 0.0485 | 0.1946 | 43.3429 | 0.1867 | 5.0170     |
| Stroke | log_g_Thermoanaerobacterium  | MR Egger                  | 37 | 1.3873  | 0.7752 | 0.0822 | -0.0806 | 0.0462 | 0.0900 | 41.0416 | 0.2590 | 71.2732    |
| Stroke | log_g_Thermoanaerobacterium  | Weighted median           | 37 | 0.4357  | 0.3457 | 0.2076 | -0.0806 | 0.0462 | 0.0900 | 41.0416 | 0.2590 | 71.2732    |
| Stroke | log_g_Thermoanaerobacterium  | Inverse variance weighted | 37 | 0.1100  | 0.2603 | 0.6726 | -0.0806 | 0.0462 | 0.0900 | 41.0416 | 0.2590 | 71.2732    |
| Stroke | log_g_Thermoanaerobacterium  | Simple mode               | 37 | 0.6538  | 0.6725 | 0.3374 | -0.0806 | 0.0462 | 0.0900 | 41.0416 | 0.2590 | 71.2732    |
| Stroke | log_g_Thermoanaerobacterium  | Weighted mode             | 37 | 0.5556  | 0.5657 | 0.3326 | -0.0806 | 0.0462 | 0.0900 | 41.0416 | 0.2590 | 71.2732    |
| Stroke | log_g_Thermosinus            | MR Egger                  | 37 | -0.0136 | 0.7455 | 0.9855 | 0.0312  | 0.0444 | 0.4872 | 35.6994 | 0.4354 | -87.4661   |
| Stroke | log_g_Thermosinus            | Weighted median           | 37 | 0.4165  | 0.3463 | 0.2290 | 0.0312  | 0.0444 | 0.4872 | 35.6994 | 0.4354 | -87.4661   |
| Stroke | log_g_Thermosinus            | Inverse variance weighted | 37 | 0.4813  | 0.2413 | 0.0461 | 0.0312  | 0.0444 | 0.4872 | 35.6994 | 0.4354 | -87.4661   |
| Stroke | log_g_Thermosinus            | Simple mode               | 37 | 0.9335  | 0.6781 | 0.1771 | 0.0312  | 0.0444 | 0.4872 | 35.6994 | 0.4354 | -87.4661   |
| Stroke | log_g_Thermosinus            | Weighted mode             | 37 | 0.4845  | 0.5316 | 0.3682 | 0.0312  | 0.0444 | 0.4872 | 35.6994 | 0.4354 | -87.4661   |
| Stroke | log_g_Yersinia               | MR Egger                  | 37 | -0.6556 | 0.7358 | 0.3790 | 0.0557  | 0.0438 | 0.2124 | 30.3361 | 0.7345 | 5.4879     |
| Stroke | log_g_Yersinia               | Weighted median           | 37 | 0.5114  | 0.3714 | 0.1685 | 0.0557  | 0.0438 | 0.2124 | 30.3361 | 0.7345 | 5.4879     |
| Stroke | log_g_Yersinia               | Inverse variance weighted | 37 | 0.2283  | 0.2391 | 0.3397 | 0.0557  | 0.0438 | 0.2124 | 30.3361 | 0.7345 | 5.4879     |
| Stroke | log_g_Yersinia               | Simple mode               | 37 | 0.8918  | 0.7832 | 0.2624 | 0.0557  | 0.0438 | 0.2124 | 30.3361 | 0.7345 | 5.4879     |
| Stroke | log_g_Yersinia               | Weighted mode             | 37 | 0.8557  | 0.7630 | 0.2695 | 0.0557  | 0.0438 | 0.2124 | 30.3361 | 0.7345 | 5.4879     |
| Stroke | log_o_Aeromonadales          | MR Egger                  | 37 | -0.3078 | 0.8682 | 0.7251 | 0.0182  | 0.0518 | 0.7276 | 48.5172 | 0.0640 | 8.6036     |
| Stroke | log_o_Aeromonadales          | Weighted median           | 37 | 0.2291  | 0.3650 | 0.5302 | 0.0182  | 0.0518 | 0.7276 | 48.5172 | 0.0640 | 8.6036     |
| Stroke | log_o_Aeromonadales          | Inverse variance weighted | 37 | -0.0196 | 0.2798 | 0.9441 | 0.0182  | 0.0518 | 0.7276 | 48.5172 | 0.0640 | 8.6036     |
| Stroke | log_o_Aeromonadales          | Simple mode               | 37 | 0.8568  | 0.8048 | 0.2941 | 0.0182  | 0.0518 | 0.7276 | 48.5172 | 0.0640 | 8.6036     |
| Stroke | log_o_Aeromonadales          | Weighted mode             | 37 | 0.5864  | 0.6843 | 0.3971 | 0.0182  | 0.0518 | 0.7276 | 48.5172 | 0.0640 | 8.6036     |
| Stroke | log_o_Alteromonadales        | MR Egger                  | 37 | -0.5191 | 0.8507 | 0.5457 | 0.0400  | 0.0507 | 0.4359 | 46.3359 | 0.0953 | 6.0303     |
| Stroke | log_o_Alteromonadales        | Weighted median           | 37 | -0.0641 | 0.3580 | 0.8579 | 0.0400  | 0.0507 | 0.4359 | 46.3359 | 0.0953 | 6.0303     |
| Stroke | log_o_Alteromonadales        | Inverse variance weighted | 37 | 0.1149  | 0.2758 | 0.6769 | 0.0400  | 0.0507 | 0.4359 | 46.3359 | 0.0953 | 6.0303     |
| Stroke | log_o_Alteromonadales        | Simple mode               | 37 | -0.3326 | 0.7012 | 0.6381 | 0.0400  | 0.0507 | 0.4359 | 46.3359 | 0.0953 | 6.0303     |
| Stroke | log_o_Alteromonadales        | Weighted mode             | 37 | -0.4758 | 0.6583 | 0.4745 | 0.0400  | 0.0507 | 0.4359 | 46.3359 | 0.0953 | 6.0303     |
| Stroke | log_o_Caulobacterales        | MR Egger                  | 37 | 1.2827  | 0.7450 | 0.0939 | -0.0676 | 0.0444 | 0.1373 | 34.2231 | 0.5533 | 41.7644    |
| Stroke | log_o_Caulobacterales        | Weighted median           | 37 | 0.2319  | 0.3493 | 0.5067 | -0.0676 | 0.0444 | 0.1373 | 34.2231 | 0.5533 | 41.7644    |
| Stroke | log_o_Caulobacterales        | Inverse variance weighted | 37 | 0.2120  | 0.2434 | 0.3836 | -0.0676 | 0.0444 | 0.1373 | 34.2231 | 0.5533 | 41.7644    |
| Stroke | log_o_Caulobacterales        | Simple mode               | 37 | 0.0993  | 0.6567 | 0.8806 | -0.0676 | 0.0444 | 0.1373 | 34.2231 | 0.5533 | 41.7644    |
| Stroke | log_o_Caulobacterales        | Weighted mode             | 37 | 0.1763  | 0.5636 | 0.7563 | -0.0676 | 0.0444 | 0.1373 | 34.2231 | 0.5533 | 41.7644    |
| Stroke | log_o_Chromatiales           | MR Egger                  | 37 | 0.0524  | 0.7837 | 0.9471 | 0.0155  | 0.0467 | 0.7416 | 39.6193 | 0.2714 | 10.0293    |
| Stroke | log_o_Chromatiales           | Weighted median           | 37 | 0.3057  | 0.3593 | 0.3947 | 0.0155  | 0.0467 | 0.7416 | 39.6193 | 0.2714 | 10.0293    |
| Stroke | log_o_Chromatiales           | Inverse variance weighted | 37 | 0.2986  | 0.2521 | 0.2362 | 0.0155  | 0.0467 | 0.7416 | 39.6193 | 0.2714 | 10.0293    |
| Stroke | log_o_Chromatiales           | Simple mode               | 37 | 0.5029  | 0.7936 | 0.5303 | 0.0155  | 0.0467 | 0.7416 | 39.6193 | 0.2714 | 10.0293    |
| Stroke | log_o_Chromatiales           | Weighted mode             | 37 | 0.4230  | 0.7845 | 0.5931 | 0.0155  | 0.0467 | 0.7416 | 39.6193 | 0.2714 | 10.0293    |
| Stroke | log_o_Rhizobiales            | MR Egger                  | 37 | -1.0448 | 0.8312 | 0.2171 | 0.0723  | 0.0496 | 0.1537 | 47.2444 | 0.0994 | 5.0530     |
| Stroke | log_o_Rhizobiales            | Weighted median           | 37 | 0.4664  | 0.3655 | 0.2019 | 0.0723  | 0.0496 | 0.1537 | 47.2444 | 0.0994 | 5.0530     |
| Stroke | log_o_Rhizobiales            | Inverse variance weighted | 37 | 0.1010  | 0.2750 | 0.7135 | 0.0723  | 0.0496 | 0.1537 | 47.2444 | 0.0994 | 5.0530     |
| Stroke | log_o_Rhizobiales            | Simple mode               | 37 | 0.9624  | 0.9375 | 0.3115 | 0.0723  | 0.0496 | 0.1537 | 47.2444 | 0.0994 | 5.0530     |
| Stroke | log_o_Rhizobiales            | Weighted mode             | 37 | 0.9847  | 0.8811 | 0.2711 | 0.0723  | 0.0496 | 0.1537 | 47.2444 | 0.0994 | 5.0530     |
| Stroke | log_o_Thermoanaerobacterales | MR Egger                  | 37 | 1.1020  | 0.8291 | 0.1924 | -0.0584 | 0.0495 | 0.2457 | 44.8234 | 0.1486 | 63.9748    |
| Stroke | log_o_Thermoanaerobacterales | Weighted median           | 37 | 0.2689  | 0.3497 | 0.4419 | -0.0584 | 0.0495 | 0.2457 | 44.8234 | 0.1486 | 63.9748    |
| Stroke | log_o_Thermoanaerobacterales | Inverse variance weighted | 37 | 0.1770  | 0.2727 | 0.5163 | -0.0584 | 0.0495 | 0.2457 | 44.8234 | 0.1486 | 63.9748    |
| Stroke | log_o_Thermoanaerobacterales | Simple mode               | 37 | 0.5258  | 0.6447 | 0.4201 | -0.0584 | 0.0495 | 0.2457 | 44.8234 | 0.1486 | 63.9748    |
| Stroke | log_o_Thermoanaerobacterales | Weighted mode             | 37 | 0.3204  | 0.5533 | 0.5662 | -0.0584 | 0.0495 | 0.2457 | 44.8234 | 0.1486 | 63.9748    |
| Stroke | log_p_Chloroflexi            | MR Egger                  | 37 | 0.8080  | 0.7403 | 0.2825 | -0.0359 | 0.0442 | 0.4217 | 25.4398 | 0.8821 | 2.7531     |
| Stroke | log_p_Chloroflexi            | Weighted median           | 37 | 0.1135  | 0.3365 | 0.7359 | -0.0359 | 0.0442 | 0.4217 | 25.4398 | 0.8821 | 2.7531     |
| Stroke | log_p_Chloroflexi            | Inverse variance weighted | 37 | 0.2391  | 0.2420 | 0.3231 | -0.0359 | 0.0442 | 0.4217 | 25.4398 | 0.8821 | 2.7531     |
| Stroke | log_p_Chloroflexi            | Simple mode               | 37 | 0.4086  | 0.6823 | 0.5530 | -0.0359 | 0.0442 | 0.4217 | 25.4398 | 0.8821 | 2.7531     |
| Stroke | log_p_Chloroflexi            | Weighted mode             | 37 | 0.2199  | 0.5534 | 0.6934 | -0.0359 | 0.0442 | 0.4217 | 25.4398 | 0.8821 | 2.7531     |

|        |                                   |                           |    |         |        |        |         |        |        |         |        |           |
|--------|-----------------------------------|---------------------------|----|---------|--------|--------|---------|--------|--------|---------|--------|-----------|
| Stroke | log_p_Cyanobacteria               | MR Egger                  | 37 | -0.2665 | 0.7827 | 0.7355 | 0.0223  | 0.0467 | 0.6363 | 39.2101 | 0.2866 | 17.6078   |
| Stroke | log_p_Cyanobacteria               | Weighted median           | 37 | -0.0233 | 0.3483 | 0.9467 | 0.0223  | 0.0467 | 0.6363 | 39.2101 | 0.2866 | 17.6078   |
| Stroke | log_p_Cyanobacteria               | Inverse variance weighted | 37 | 0.0865  | 0.2521 | 0.7316 | 0.0223  | 0.0467 | 0.6363 | 39.2101 | 0.2866 | 17.6078   |
| Stroke | log_p_Cyanobacteria               | Simple mode               | 37 | -0.5093 | 0.7399 | 0.4956 | 0.0223  | 0.0467 | 0.6363 | 39.2101 | 0.2866 | 17.6078   |
| Stroke | log_p_Cyanobacteria               | Weighted mode             | 37 | -0.2742 | 0.7299 | 0.7094 | 0.0223  | 0.0467 | 0.6363 | 39.2101 | 0.2866 | 17.6078   |
| Stroke | log_p_Euryarchaeota               | MR Egger                  | 37 | -0.8862 | 0.7406 | 0.2395 | 0.0637  | 0.0442 | 0.1584 | 32.5703 | 0.6325 | 18.0739   |
| Stroke | log_p_Euryarchaeota               | Weighted median           | 37 | 0.1528  | 0.3490 | 0.6614 | 0.0637  | 0.0442 | 0.1584 | 32.5703 | 0.6325 | 18.0739   |
| Stroke | log_p_Euryarchaeota               | Inverse variance weighted | 37 | 0.1228  | 0.2419 | 0.6118 | 0.0637  | 0.0442 | 0.1584 | 32.5703 | 0.6325 | 18.0739   |
| Stroke | log_p_Euryarchaeota               | Simple mode               | 37 | 0.4632  | 0.6969 | 0.5105 | 0.0637  | 0.0442 | 0.1584 | 32.5703 | 0.6325 | 18.0739   |
| Stroke | log_p_Euryarchaeota               | Weighted mode             | 37 | 0.0865  | 0.6106 | 0.8881 | 0.0637  | 0.0442 | 0.1584 | 32.5703 | 0.6325 | 18.0739   |
| Stroke | log_p_Fibrobacteres               | MR Egger                  | 37 | 1.3673  | 0.7517 | 0.0775 | -0.0843 | 0.0448 | 0.0681 | 31.3000 | 0.6916 | 246.1537  |
| Stroke | log_p_Fibrobacteres               | Weighted median           | 37 | -0.0406 | 0.3713 | 0.9129 | -0.0843 | 0.0448 | 0.0681 | 31.3000 | 0.6916 | 246.1537  |
| Stroke | log_p_Fibrobacteres               | Inverse variance weighted | 37 | 0.0293  | 0.2448 | 0.9047 | -0.0843 | 0.0448 | 0.0681 | 31.3000 | 0.6916 | 246.1537  |
| Stroke | log_p_Fibrobacteres               | Simple mode               | 37 | -0.8521 | 0.8605 | 0.3286 | -0.0843 | 0.0448 | 0.0681 | 31.3000 | 0.6916 | 246.1537  |
| Stroke | log_p_Fibrobacteres               | Weighted mode             | 37 | -0.8308 | 0.7780 | 0.2927 | -0.0843 | 0.0448 | 0.0681 | 31.3000 | 0.6916 | 246.1537  |
| Stroke | log_p_Tenericutes                 | MR Egger                  | 37 | -0.3674 | 0.7410 | 0.6231 | 0.0049  | 0.0442 | 0.9126 | 28.2710 | 0.7827 | 15.4994   |
| Stroke | log_p_Tenericutes                 | Weighted median           | 37 | -0.3002 | 0.3396 | 0.3767 | 0.0049  | 0.0442 | 0.9126 | 28.2710 | 0.7827 | 15.4994   |
| Stroke | log_p_Tenericutes                 | Inverse variance weighted | 37 | -0.2899 | 0.2420 | 0.2309 | 0.0049  | 0.0442 | 0.9126 | 28.2710 | 0.7827 | 15.4994   |
| Stroke | log_p_Tenericutes                 | Simple mode               | 37 | -0.3096 | 0.6266 | 0.6243 | 0.0049  | 0.0442 | 0.9126 | 28.2710 | 0.7827 | 15.4994   |
| Stroke | log_p_Tenericutes                 | Weighted mode             | 37 | -0.3707 | 0.5576 | 0.5105 | 0.0049  | 0.0442 | 0.9126 | 28.2710 | 0.7827 | 15.4994   |
| Stroke | log_s_Abiotrophia_defectiva       | MR Egger                  | 37 | 0.2204  | 0.7324 | 0.7652 | -0.0167 | 0.0437 | 0.7052 | 30.9039 | 0.6662 | 72.5245   |
| Stroke | log_s_Abiotrophia_defectiva       | Weighted median           | 37 | 0.0051  | 0.3617 | 0.9887 | -0.0167 | 0.0437 | 0.7052 | 30.9039 | 0.6662 | 72.5245   |
| Stroke | log_s_Abiotrophia_defectiva       | Inverse variance weighted | 37 | -0.0436 | 0.2389 | 0.8552 | -0.0167 | 0.0437 | 0.7052 | 30.9039 | 0.6662 | 72.5245   |
| Stroke | log_s_Abiotrophia_defectiva       | Simple mode               | 37 | 0.2242  | 0.7214 | 0.7578 | -0.0167 | 0.0437 | 0.7052 | 30.9039 | 0.6662 | 72.5245   |
| Stroke | log_s_Abiotrophia_defectiva       | Weighted mode             | 37 | 0.1590  | 0.6560 | 0.8098 | -0.0167 | 0.0437 | 0.7052 | 30.9039 | 0.6662 | 72.5245   |
| Stroke | log_s_Achromobacter_piechaudii    | MR Egger                  | 37 | -0.8691 | 0.7499 | 0.2543 | 0.0570  | 0.0447 | 0.2099 | 37.5293 | 0.3989 | 300.3060  |
| Stroke | log_s_Achromobacter_piechaudii    | Weighted median           | 37 | 0.4078  | 0.3554 | 0.2512 | 0.0570  | 0.0447 | 0.2099 | 37.5293 | 0.3989 | 300.3060  |
| Stroke | log_s_Achromobacter_piechaudii    | Inverse variance weighted | 37 | 0.0369  | 0.2455 | 0.8806 | 0.0570  | 0.0447 | 0.2099 | 37.5293 | 0.3989 | 300.3060  |
| Stroke | log_s_Achromobacter_piechaudii    | Simple mode               | 37 | 0.5625  | 0.7122 | 0.4348 | 0.0570  | 0.0447 | 0.2099 | 37.5293 | 0.3989 | 300.3060  |
| Stroke | log_s_Achromobacter_piechaudii    | Weighted mode             | 37 | 0.5625  | 0.6919 | 0.4216 | 0.0570  | 0.0447 | 0.2099 | 37.5293 | 0.3989 | 300.3060  |
| Stroke | log_s_Acidaminococcus_intestini   | MR Egger                  | 37 | 1.5909  | 0.8521 | 0.0703 | -0.0701 | 0.0507 | 0.1758 | 48.5878 | 0.0784 | -163.1584 |
| Stroke | log_s_Acidaminococcus_intestini   | Weighted median           | 37 | 0.7224  | 0.3590 | 0.0442 | -0.0701 | 0.0507 | 0.1758 | 48.5878 | 0.0784 | -163.1584 |
| Stroke | log_s_Acidaminococcus_intestini   | Inverse variance weighted | 37 | 0.4772  | 0.2801 | 0.0884 | -0.0701 | 0.0507 | 0.1758 | 48.5878 | 0.0784 | -163.1584 |
| Stroke | log_s_Acidaminococcus_intestini   | Simple mode               | 37 | 0.7275  | 0.7392 | 0.3316 | -0.0701 | 0.0507 | 0.1758 | 48.5878 | 0.0784 | -163.1584 |
| Stroke | log_s_Acidaminococcus_intestini   | Weighted mode             | 37 | 1.0123  | 0.6343 | 0.1192 | -0.0701 | 0.0507 | 0.1758 | 48.5878 | 0.0784 | -163.1584 |
| Stroke | log_s_Acinetobacter_baumannii     | MR Egger                  | 37 | -1.5649 | 0.7792 | 0.0524 | 0.0904  | 0.0464 | 0.0593 | 42.5095 | 0.2110 | 143.7380  |
| Stroke | log_s_Acinetobacter_baumannii     | Weighted median           | 37 | -0.3380 | 0.3751 | 0.3676 | 0.0904  | 0.0464 | 0.0593 | 42.5095 | 0.2110 | 143.7380  |
| Stroke | log_s_Acinetobacter_baumannii     | Inverse variance weighted | 37 | -0.1280 | 0.2622 | 0.6253 | 0.0904  | 0.0464 | 0.0593 | 42.5095 | 0.2110 | 143.7380  |
| Stroke | log_s_Acinetobacter_baumannii     | Simple mode               | 37 | -0.2461 | 0.7830 | 0.7551 | 0.0904  | 0.0464 | 0.0593 | 42.5095 | 0.2110 | 143.7380  |
| Stroke | log_s_Acinetobacter_baumannii     | Weighted mode             | 37 | -0.5133 | 0.7734 | 0.5111 | 0.0904  | 0.0464 | 0.0593 | 42.5095 | 0.2110 | 143.7380  |
| Stroke | log_s_Acinetobacter_haemolyticus  | MR Egger                  | 37 | -0.9821 | 0.7401 | 0.1931 | 0.0551  | 0.0441 | 0.2195 | 26.0660 | 0.8886 | 6.4398    |
| Stroke | log_s_Acinetobacter_haemolyticus  | Weighted median           | 37 | 0.2583  | 0.3378 | 0.4445 | 0.0551  | 0.0441 | 0.2195 | 26.0660 | 0.8886 | 6.4398    |
| Stroke | log_s_Acinetobacter_haemolyticus  | Inverse variance weighted | 37 | -0.1069 | 0.2402 | 0.6564 | 0.0551  | 0.0441 | 0.2195 | 26.0660 | 0.8886 | 6.4398    |
| Stroke | log_s_Acinetobacter_haemolyticus  | Simple mode               | 37 | 0.2449  | 0.6594 | 0.7126 | 0.0551  | 0.0441 | 0.2195 | 26.0660 | 0.8886 | 6.4398    |
| Stroke | log_s_Acinetobacter_haemolyticus  | Weighted mode             | 37 | 0.2755  | 0.6714 | 0.6840 | 0.0551  | 0.0441 | 0.2195 | 26.0660 | 0.8886 | 6.4398    |
| Stroke | log_s_Aggregatibacter_aphrophilus | MR Egger                  | 37 | 0.0200  | 0.7438 | 0.9787 | -0.0057 | 0.0444 | 0.8990 | 22.1345 | 0.9553 | 324.6824  |
| Stroke | log_s_Aggregatibacter_aphrophilus | Weighted median           | 37 | -0.0264 | 0.3405 | 0.9383 | -0.0057 | 0.0444 | 0.8990 | 22.1345 | 0.9553 | 324.6824  |
| Stroke | log_s_Aggregatibacter_aphrophilus | Inverse variance weighted | 37 | -0.0699 | 0.2429 | 0.7734 | -0.0057 | 0.0444 | 0.8990 | 22.1345 | 0.9553 | 324.6824  |
| Stroke | log_s_Aggregatibacter_aphrophilus | Simple mode               | 37 | -0.3735 | 0.6972 | 0.5954 | -0.0057 | 0.0444 | 0.8990 | 22.1345 | 0.9553 | 324.6824  |
| Stroke | log_s_Aggregatibacter_aphrophilus | Weighted mode             | 37 | -0.3486 | 0.5296 | 0.5145 | -0.0057 | 0.0444 | 0.8990 | 22.1345 | 0.9553 | 324.6824  |
| Stroke | log_s_Bifidobacterium_angulatum   | MR Egger                  | 37 | -1.5309 | 0.7616 | 0.0522 | 0.0874  | 0.0454 | 0.0624 | 32.2568 | 0.6473 | 3.2513    |
| Stroke | log_s_Bifidobacterium_angulatum   | Weighted median           | 37 | -0.4829 | 0.3552 | 0.1739 | 0.0874  | 0.0454 | 0.0624 | 32.2568 | 0.6473 | 3.2513    |
| Stroke | log_s_Bifidobacterium_angulatum   | Inverse variance weighted | 37 | -0.1447 | 0.2477 | 0.5593 | 0.0874  | 0.0454 | 0.0624 | 32.2568 | 0.6473 | 3.2513    |
| Stroke | log_s_Bifidobacterium_angulatum   | Simple mode               | 37 | -0.4127 | 0.7196 | 0.5699 | 0.0874  | 0.0454 | 0.0624 | 32.2568 | 0.6473 | 3.2513    |
| Stroke | log_s_Bifidobacterium_angulatum   | Weighted mode             | 37 | -0.6482 | 0.6042 | 0.2905 | 0.0874  | 0.0454 | 0.0624 | 32.2568 | 0.6473 | 3.2513    |
| Stroke | log_s_Bifidobacterium_dentium     | MR Egger                  | 37 | -1.1954 | 0.7548 | 0.1223 | 0.0614  | 0.0450 | 0.1808 | 29.4920 | 0.7700 | 7.5614    |
| Stroke | log_s_Bifidobacterium_dentium     | Weighted median           | 37 | -0.8317 | 0.3452 | 0.0160 | 0.0614  | 0.0450 | 0.1808 | 29.4920 | 0.7700 | 7.5614    |
| Stroke | log_s_Bifidobacterium_dentium     | Inverse variance weighted | 37 | -0.2209 | 0.2457 | 0.3687 | 0.0614  | 0.0450 | 0.1808 | 29.4920 | 0.7700 | 7.5614    |
| Stroke | log_s_Bifidobacterium_dentium     | Simple mode               | 37 | -1.2720 | 0.7489 | 0.0980 | 0.0614  | 0.0450 | 0.1808 | 29.4920 | 0.7700 | 7.5614    |
| Stroke | log_s_Bifidobacterium_dentium     | Weighted mode             | 37 | -1.0929 | 0.5877 | 0.0711 | 0.0614  | 0.0450 | 0.1808 | 29.4920 | 0.7700 | 7.5614    |
| Stroke | log_s_Brucella_melitensis         | MR Egger                  | 37 | -0.2599 | 0.8832 | 0.7703 | 0.0423  | 0.0526 | 0.4275 | 49.9698 | 0.0484 | 8.1600    |

|        |                                        |                           |    |         |        |        |         |        |        |         |        |            |
|--------|----------------------------------------|---------------------------|----|---------|--------|--------|---------|--------|--------|---------|--------|------------|
| Stroke | log_s_Brucella_melitensis              | Weighted median           | 37 | 0.5623  | 0.3933 | 0.1528 | 0.0423  | 0.0526 | 0.4275 | 49.9698 | 0.0484 | 8.1600     |
| Stroke | log_s_Brucella_melitensis              | Inverse variance weighted | 37 | 0.4104  | 0.2863 | 0.1517 | 0.0423  | 0.0526 | 0.4275 | 49.9698 | 0.0484 | 8.1600     |
| Stroke | log_s_Brucella_melitensis              | Simple mode               | 37 | 1.2537  | 0.9722 | 0.2054 | 0.0423  | 0.0526 | 0.4275 | 49.9698 | 0.0484 | 8.1600     |
| Stroke | log_s_Brucella_melitensis              | Weighted mode             | 37 | 1.4932  | 1.0025 | 0.1451 | 0.0423  | 0.0526 | 0.4275 | 49.9698 | 0.0484 | 8.1600     |
| Stroke | log_s_Burkholderia_multivorans         | MR Egger                  | 37 | -1.2293 | 0.9126 | 0.1866 | 0.0749  | 0.0543 | 0.1767 | 55.5943 | 0.0196 | -106.1049  |
| Stroke | log_s_Burkholderia_multivorans         | Weighted median           | 37 | -0.0429 | 0.3602 | 0.9052 | 0.0749  | 0.0543 | 0.1767 | 55.5943 | 0.0196 | -106.1049  |
| Stroke | log_s_Burkholderia_multivorans         | Inverse variance weighted | 37 | -0.0385 | 0.2988 | 0.8973 | 0.0749  | 0.0543 | 0.1767 | 55.5943 | 0.0196 | -106.1049  |
| Stroke | log_s_Burkholderia_multivorans         | Simple mode               | 37 | 0.1351  | 0.7007 | 0.8483 | 0.0749  | 0.0543 | 0.1767 | 55.5943 | 0.0196 | -106.1049  |
| Stroke | log_s_Burkholderia_multivorans         | Weighted mode             | 37 | 0.0256  | 0.7300 | 0.9722 | 0.0749  | 0.0543 | 0.1767 | 55.5943 | 0.0196 | -106.1049  |
| Stroke | log_s_Campylobacter_conciscus          | MR Egger                  | 37 | -0.7706 | 0.8171 | 0.3521 | 0.0594  | 0.0487 | 0.2311 | 44.7720 | 0.1498 | 19.2208    |
| Stroke | log_s_Campylobacter_conciscus          | Weighted median           | 37 | -0.1499 | 0.3633 | 0.6799 | 0.0594  | 0.0487 | 0.2311 | 44.7720 | 0.1498 | 19.2208    |
| Stroke | log_s_Campylobacter_conciscus          | Inverse variance weighted | 37 | 0.1706  | 0.2687 | 0.5256 | 0.0594  | 0.0487 | 0.2311 | 44.7720 | 0.1498 | 19.2208    |
| Stroke | log_s_Campylobacter_conciscus          | Simple mode               | 37 | -0.1044 | 0.7163 | 0.8850 | 0.0594  | 0.0487 | 0.2311 | 44.7720 | 0.1498 | 19.2208    |
| Stroke | log_s_Campylobacter_conciscus          | Weighted mode             | 37 | -0.2711 | 0.5408 | 0.6193 | 0.0594  | 0.0487 | 0.2311 | 44.7720 | 0.1498 | 19.2208    |
| Stroke | log_s_Citrobacter_rodentium            | MR Egger                  | 37 | -0.5072 | 0.7407 | 0.4980 | 0.0247  | 0.0441 | 0.5791 | 33.4554 | 0.5427 | 8.5854     |
| Stroke | log_s_Citrobacter_rodentium            | Weighted median           | 37 | 0.0982  | 0.3513 | 0.7798 | 0.0247  | 0.0441 | 0.5791 | 33.4554 | 0.5427 | 8.5854     |
| Stroke | log_s_Citrobacter_rodentium            | Inverse variance weighted | 37 | -0.1148 | 0.2403 | 0.6327 | 0.0247  | 0.0441 | 0.5791 | 33.4554 | 0.5427 | 8.5854     |
| Stroke | log_s_Citrobacter_rodentium            | Simple mode               | 37 | 0.3691  | 0.7790 | 0.6385 | 0.0247  | 0.0441 | 0.5791 | 33.4554 | 0.5427 | 8.5854     |
| Stroke | log_s_Citrobacter_rodentium            | Weighted mode             | 37 | 0.2721  | 0.8207 | 0.7421 | 0.0247  | 0.0441 | 0.5791 | 33.4554 | 0.5427 | 8.5854     |
| Stroke | log_s_Clostridium_butyrlicum           | MR Egger                  | 37 | -0.4979 | 0.7931 | 0.5343 | 0.0288  | 0.0473 | 0.5464 | 40.6746 | 0.2347 | 3300.2341  |
| Stroke | log_s_Clostridium_butyrlicum           | Weighted median           | 37 | -0.0840 | 0.3667 | 0.8189 | 0.0288  | 0.0473 | 0.5464 | 40.6746 | 0.2347 | 3300.2341  |
| Stroke | log_s_Clostridium_butyrlicum           | Inverse variance weighted | 37 | -0.0412 | 0.2562 | 0.8724 | 0.0288  | 0.0473 | 0.5464 | 40.6746 | 0.2347 | 3300.2341  |
| Stroke | log_s_Clostridium_butyrlicum           | Simple mode               | 37 | -0.3813 | 0.6936 | 0.5859 | 0.0288  | 0.0473 | 0.5464 | 40.6746 | 0.2347 | 3300.2341  |
| Stroke | log_s_Clostridium_butyrlicum           | Weighted mode             | 37 | -0.1804 | 0.5791 | 0.7572 | 0.0288  | 0.0473 | 0.5464 | 40.6746 | 0.2347 | 3300.2341  |
| Stroke | log_s_Clostridium_hiranonis            | MR Egger                  | 37 | 0.1252  | 0.7427 | 0.8671 | 0.0034  | 0.0443 | 0.9384 | 33.6878 | 0.5314 | NA         |
| Stroke | log_s_Clostridium_hiranonis            | Weighted median           | 37 | 0.3298  | 0.3395 | 0.3314 | 0.0034  | 0.0443 | 0.9384 | 33.6878 | 0.5314 | NA         |
| Stroke | log_s_Clostridium_hiranonis            | Inverse variance weighted | 37 | 0.1799  | 0.2416 | 0.4567 | 0.0034  | 0.0443 | 0.9384 | 33.6878 | 0.5314 | NA         |
| Stroke | log_s_Clostridium_hiranonis            | Simple mode               | 37 | 0.0415  | 0.6316 | 0.9480 | 0.0034  | 0.0443 | 0.9384 | 33.6878 | 0.5314 | NA         |
| Stroke | log_s_Clostridium_hiranonis            | Weighted mode             | 37 | 0.3420  | 0.5171 | 0.5126 | 0.0034  | 0.0443 | 0.9384 | 33.6878 | 0.5314 | NA         |
| Stroke | log_s_Clostridium_hylemonae            | MR Egger                  | 37 | 0.4344  | 0.9472 | 0.6493 | -0.0553 | 0.0565 | 0.3345 | 58.4993 | 0.0103 | 24.6687    |
| Stroke | log_s_Clostridium_hylemonae            | Weighted median           | 37 | -0.6136 | 0.3616 | 0.0897 | -0.0553 | 0.0565 | 0.3345 | 58.4993 | 0.0103 | 24.6687    |
| Stroke | log_s_Clostridium_hylemonae            | Inverse variance weighted | 37 | -0.4419 | 0.3083 | 0.1518 | -0.0553 | 0.0565 | 0.3345 | 58.4993 | 0.0103 | 24.6687    |
| Stroke | log_s_Clostridium_hylemonae            | Simple mode               | 37 | -1.0683 | 0.8822 | 0.2338 | -0.0553 | 0.0565 | 0.3345 | 58.4993 | 0.0103 | 24.6687    |
| Stroke | log_s_Clostridium_hylemonae            | Weighted mode             | 37 | -1.2333 | 0.7318 | 0.1006 | -0.0553 | 0.0565 | 0.3345 | 58.4993 | 0.0103 | 24.6687    |
| Stroke | log_s_Clostridium_kluyveri             | MR Egger                  | 37 | 0.4882  | 0.7318 | 0.5091 | -0.0029 | 0.0437 | 0.9466 | 27.9602 | 0.7951 | 1.5069     |
| Stroke | log_s_Clostridium_kluyveri             | Weighted median           | 37 | 0.3450  | 0.3525 | 0.3277 | -0.0029 | 0.0437 | 0.9466 | 27.9602 | 0.7951 | 1.5069     |
| Stroke | log_s_Clostridium_kluyveri             | Inverse variance weighted | 37 | 0.4416  | 0.2394 | 0.0651 | -0.0029 | 0.0437 | 0.9466 | 27.9602 | 0.7951 | 1.5069     |
| Stroke | log_s_Clostridium_kluyveri             | Simple mode               | 37 | 0.4289  | 0.7284 | 0.5596 | -0.0029 | 0.0437 | 0.9466 | 27.9602 | 0.7951 | 1.5069     |
| Stroke | log_s_Clostridium_kluyveri             | Weighted mode             | 37 | 0.4459  | 0.6273 | 0.4818 | -0.0029 | 0.0437 | 0.9466 | 27.9602 | 0.7951 | 1.5069     |
| Stroke | log_s_Clostridium_phytofermentans      | MR Egger                  | 37 | 1.6417  | 0.9148 | 0.0813 | -0.1013 | 0.0545 | 0.0717 | 58.7804 | 0.0096 | 29.4356    |
| Stroke | log_s_Clostridium_phytofermentans      | Weighted median           | 37 | 0.1646  | 0.3675 | 0.6542 | -0.1013 | 0.0545 | 0.0717 | 58.7804 | 0.0096 | 29.4356    |
| Stroke | log_s_Clostridium_phytofermentans      | Inverse variance weighted | 37 | 0.0357  | 0.3088 | 0.9081 | -0.1013 | 0.0545 | 0.0717 | 58.7804 | 0.0096 | 29.4356    |
| Stroke | log_s_Clostridium_phytofermentans      | Simple mode               | 37 | -1.4397 | 0.8280 | 0.0906 | -0.1013 | 0.0545 | 0.0717 | 58.7804 | 0.0096 | 29.4356    |
| Stroke | log_s_Clostridium_phytofermentans      | Weighted mode             | 37 | -0.0366 | 0.6458 | 0.9551 | -0.1013 | 0.0545 | 0.0717 | 58.7804 | 0.0096 | 29.4356    |
| Stroke | log_s_Collinsella_stercoris            | MR Egger                  | 37 | -0.0435 | 0.7847 | 0.9561 | 0.0031  | 0.0468 | 0.9481 | 39.5015 | 0.2757 | 10.0002    |
| Stroke | log_s_Collinsella_stercoris            | Weighted median           | 37 | -0.0485 | 0.3599 | 0.8928 | 0.0031  | 0.0468 | 0.9481 | 39.5015 | 0.2757 | 10.0002    |
| Stroke | log_s_Collinsella_stercoris            | Inverse variance weighted | 37 | 0.0051  | 0.2526 | 0.9838 | 0.0031  | 0.0468 | 0.9481 | 39.5015 | 0.2757 | 10.0002    |
| Stroke | log_s_Collinsella_stercoris            | Simple mode               | 37 | -0.1840 | 0.7385 | 0.8046 | 0.0031  | 0.0468 | 0.9481 | 39.5015 | 0.2757 | 10.0002    |
| Stroke | log_s_Collinsella_stercoris            | Weighted mode             | 37 | -0.1004 | 0.6106 | 0.8704 | 0.0031  | 0.0468 | 0.9481 | 39.5015 | 0.2757 | 10.0002    |
| Stroke | log_s_Comamonas_testosteroni           | MR Egger                  | 37 | -0.9371 | 0.8895 | 0.2993 | 0.0591  | 0.0530 | 0.2724 | 52.5398 | 0.0369 | -2762.2356 |
| Stroke | log_s_Comamonas_testosteroni           | Weighted median           | 37 | 0.1309  | 0.3693 | 0.7230 | 0.0591  | 0.0530 | 0.2724 | 52.5398 | 0.0369 | -2762.2356 |
| Stroke | log_s_Comamonas_testosteroni           | Inverse variance weighted | 37 | 0.0009  | 0.2904 | 0.9975 | 0.0591  | 0.0530 | 0.2724 | 52.5398 | 0.0369 | -2762.2356 |
| Stroke | log_s_Comamonas_testosteroni           | Simple mode               | 37 | 0.2685  | 0.7372 | 0.7179 | 0.0591  | 0.0530 | 0.2724 | 52.5398 | 0.0369 | -2762.2356 |
| Stroke | log_s_Comamonas_testosteroni           | Weighted mode             | 37 | 0.4066  | 0.6683 | 0.5467 | 0.0591  | 0.0530 | 0.2724 | 52.5398 | 0.0369 | -2762.2356 |
| Stroke | log_s_Corynebacterium_glucuronolyticum | MR Egger                  | 37 | -0.6772 | 0.7493 | 0.3723 | 0.0460  | 0.0447 | 0.3103 | 36.8101 | 0.4312 | 8.3039     |
| Stroke | log_s_Corynebacterium_glucuronolyticum | Weighted median           | 37 | -0.2374 | 0.3461 | 0.4928 | 0.0460  | 0.0447 | 0.3103 | 36.8101 | 0.4312 | 8.3039     |
| Stroke | log_s_Corynebacterium_glucuronolyticum | Inverse variance weighted | 37 | 0.0521  | 0.2444 | 0.8314 | 0.0460  | 0.0447 | 0.3103 | 36.8101 | 0.4312 | 8.3039     |
| Stroke | log_s_Corynebacterium_glucuronolyticum | Simple mode               | 37 | -0.4423 | 0.6626 | 0.5087 | 0.0460  | 0.0447 | 0.3103 | 36.8101 | 0.4312 | 8.3039     |
| Stroke | log_s_Corynebacterium_glucuronolyticum | Weighted mode             | 37 | -0.0535 | 0.5324 | 0.9206 | 0.0460  | 0.0447 | 0.3103 | 36.8101 | 0.4312 | 8.3039     |
| Stroke | log_s_Desulfovibrio_alaskensis         | MR Egger                  | 37 | -0.4286 | 0.7562 | 0.5745 | 0.0109  | 0.0451 | 0.8099 | 36.6683 | 0.3914 | 18.0227    |
| Stroke | log_s_Desulfovibrio_alaskensis         | Weighted median           | 37 | -0.3928 | 0.3471 | 0.2577 | 0.0109  | 0.0451 | 0.8099 | 36.6683 | 0.3914 | 18.0227    |

|        |                                    |                           |    |         |        |        |         |        |        |         |        |            |
|--------|------------------------------------|---------------------------|----|---------|--------|--------|---------|--------|--------|---------|--------|------------|
| Stroke | log_s_Desulfovibrio_alaskensis     | Inverse variance weighted | 37 | -0.2553 | 0.2427 | 0.2928 | 0.0109  | 0.0451 | 0.8099 | 36.6683 | 0.3914 | 18.0227    |
| Stroke | log_s_Desulfovibrio_alaskensis     | Simple mode               | 37 | -0.2893 | 0.7924 | 0.7172 | 0.0109  | 0.0451 | 0.8099 | 36.6683 | 0.3914 | 18.0227    |
| Stroke | log_s_Desulfovibrio_alaskensis     | Weighted mode             | 37 | -0.5446 | 0.7205 | 0.4547 | 0.0109  | 0.0451 | 0.8099 | 36.6683 | 0.3914 | 18.0227    |
| Stroke | log_s_Enterobacter_asburiae        | MR Egger                  | 37 | -0.6408 | 0.7977 | 0.4273 | 0.0413  | 0.0475 | 0.3911 | 40.8000 | 0.2306 | -754.3409  |
| Stroke | log_s_Enterobacter_asburiae        | Weighted median           | 37 | -0.2672 | 0.3595 | 0.4572 | 0.0413  | 0.0475 | 0.3911 | 40.8000 | 0.2306 | -754.3409  |
| Stroke | log_s_Enterobacter_asburiae        | Inverse variance weighted | 37 | 0.0143  | 0.2584 | 0.9558 | 0.0413  | 0.0475 | 0.3911 | 40.8000 | 0.2306 | -754.3409  |
| Stroke | log_s_Enterobacter_asburiae        | Simple mode               | 37 | -0.2736 | 0.7485 | 0.7169 | 0.0413  | 0.0475 | 0.3911 | 40.8000 | 0.2306 | -754.3409  |
| Stroke | log_s_Enterobacter_asburiae        | Weighted mode             | 37 | -0.4611 | 0.7079 | 0.5189 | 0.0413  | 0.0475 | 0.3911 | 40.8000 | 0.2306 | -754.3409  |
| Stroke | log_s_Enterobacter_cancerogenus    | MR Egger                  | 37 | -0.3218 | 0.9157 | 0.7274 | 0.0272  | 0.0546 | 0.6216 | 53.7310 | 0.0223 | -69.4888   |
| Stroke | log_s_Enterobacter_cancerogenus    | Weighted median           | 37 | 0.4005  | 0.3595 | 0.2654 | 0.0272  | 0.0546 | 0.6216 | 53.7310 | 0.0223 | -69.4888   |
| Stroke | log_s_Enterobacter_cancerogenus    | Inverse variance weighted | 37 | 0.1094  | 0.2947 | 0.7106 | 0.0272  | 0.0546 | 0.6216 | 53.7310 | 0.0223 | -69.4888   |
| Stroke | log_s_Enterobacter_cancerogenus    | Simple mode               | 37 | 1.1975  | 0.8566 | 0.1707 | 0.0272  | 0.0546 | 0.6216 | 53.7310 | 0.0223 | -69.4888   |
| Stroke | log_s_Enterobacter_cancerogenus    | Weighted mode             | 37 | 1.0473  | 0.6979 | 0.1422 | 0.0272  | 0.0546 | 0.6216 | 53.7310 | 0.0223 | -69.4888   |
| Stroke | log_s_Escherichia_albertii         | MR Egger                  | 37 | 0.2728  | 0.7948 | 0.7335 | -0.0091 | 0.0474 | 0.8483 | 41.0984 | 0.2209 | 12.4023    |
| Stroke | log_s_Escherichia_albertii         | Weighted median           | 37 | 0.0343  | 0.3496 | 0.9219 | -0.0091 | 0.0474 | 0.8483 | 41.0984 | 0.2209 | 12.4023    |
| Stroke | log_s_Escherichia_albertii         | Inverse variance weighted | 37 | 0.1280  | 0.2564 | 0.6175 | -0.0091 | 0.0474 | 0.8483 | 41.0984 | 0.2209 | 12.4023    |
| Stroke | log_s_Escherichia_albertii         | Simple mode               | 37 | -0.5972 | 0.6608 | 0.3721 | -0.0091 | 0.0474 | 0.8483 | 41.0984 | 0.2209 | 12.4023    |
| Stroke | log_s_Escherichia_albertii         | Weighted mode             | 37 | 0.1396  | 0.5689 | 0.8075 | -0.0091 | 0.0474 | 0.8483 | 41.0984 | 0.2209 | 12.4023    |
| Stroke | log_s_Eubacterium_cellulosolvens   | MR Egger                  | 37 | 0.8942  | 0.8421 | 0.2956 | -0.0442 | 0.0502 | 0.3850 | 45.9553 | 0.1018 | 18.1592    |
| Stroke | log_s_Eubacterium_cellulosolvens   | Weighted median           | 37 | 0.4479  | 0.3578 | 0.2107 | -0.0442 | 0.0502 | 0.3850 | 45.9553 | 0.1018 | 18.1592    |
| Stroke | log_s_Eubacterium_cellulosolvens   | Inverse variance weighted | 37 | 0.1939  | 0.2742 | 0.4795 | -0.0442 | 0.0502 | 0.3850 | 45.9553 | 0.1018 | 18.1592    |
| Stroke | log_s_Eubacterium_cellulosolvens   | Simple mode               | 37 | 0.3497  | 0.7240 | 0.6320 | -0.0442 | 0.0502 | 0.3850 | 45.9553 | 0.1018 | 18.1592    |
| Stroke | log_s_Eubacterium_cellulosolvens   | Weighted mode             | 37 | 0.4440  | 0.5615 | 0.4343 | -0.0442 | 0.0502 | 0.3850 | 45.9553 | 0.1018 | 18.1592    |
| Stroke | log_s_Filifactor_alocis            | MR Egger                  | 37 | 0.9451  | 0.7332 | 0.2058 | -0.0595 | 0.0437 | 0.1825 | 23.7547 | 0.9416 | 2.0782     |
| Stroke | log_s_Filifactor_alocis            | Weighted median           | 37 | 0.0289  | 0.3318 | 0.9305 | -0.0595 | 0.0437 | 0.1825 | 23.7547 | 0.9416 | 2.0782     |
| Stroke | log_s_Filifactor_alocis            | Inverse variance weighted | 37 | 0.0025  | 0.2393 | 0.9917 | -0.0595 | 0.0437 | 0.1825 | 23.7547 | 0.9416 | 2.0782     |
| Stroke | log_s_Filifactor_alocis            | Simple mode               | 37 | -0.0559 | 0.6515 | 0.9321 | -0.0595 | 0.0437 | 0.1825 | 23.7547 | 0.9416 | 2.0782     |
| Stroke | log_s_Filifactor_alocis            | Weighted mode             | 37 | -0.0041 | 0.6236 | 0.9948 | -0.0595 | 0.0437 | 0.1825 | 23.7547 | 0.9416 | 2.0782     |
| Stroke | log_s_Fusobacterium_gonidiaformans | MR Egger                  | 37 | -0.1801 | 0.7362 | 0.8082 | -0.0040 | 0.0439 | 0.9284 | 21.2729 | 0.9672 | 7.2019     |
| Stroke | log_s_Fusobacterium_gonidiaformans | Weighted median           | 37 | -0.0726 | 0.3435 | 0.8327 | -0.0040 | 0.0439 | 0.9284 | 21.2729 | 0.9672 | 7.2019     |
| Stroke | log_s_Fusobacterium_gonidiaformans | Inverse variance weighted | 37 | -0.2431 | 0.2399 | 0.3109 | -0.0040 | 0.0439 | 0.9284 | 21.2729 | 0.9672 | 7.2019     |
| Stroke | log_s_Fusobacterium_gonidiaformans | Simple mode               | 37 | -0.0569 | 0.7040 | 0.9361 | -0.0040 | 0.0439 | 0.9284 | 21.2729 | 0.9672 | 7.2019     |
| Stroke | log_s_Fusobacterium_gonidiaformans | Weighted mode             | 37 | -0.0409 | 0.6552 | 0.9506 | -0.0040 | 0.0439 | 0.9284 | 21.2729 | 0.9672 | 7.2019     |
| Stroke | log_s_Fusobacterium_nucleatum      | MR Egger                  | 37 | -0.2411 | 0.7403 | 0.7466 | 0.0032  | 0.0442 | 0.9432 | 24.9409 | 0.8961 | 2.6042     |
| Stroke | log_s_Fusobacterium_nucleatum      | Weighted median           | 37 | -0.1459 | 0.3224 | 0.6510 | 0.0032  | 0.0442 | 0.9432 | 24.9409 | 0.8961 | 2.6042     |
| Stroke | log_s_Fusobacterium_nucleatum      | Inverse variance weighted | 37 | -0.1909 | 0.2418 | 0.4298 | 0.0032  | 0.0442 | 0.9432 | 24.9409 | 0.8961 | 2.6042     |
| Stroke | log_s_Fusobacterium_nucleatum      | Simple mode               | 37 | -0.1832 | 0.6312 | 0.7734 | 0.0032  | 0.0442 | 0.9432 | 24.9409 | 0.8961 | 2.6042     |
| Stroke | log_s_Fusobacterium_nucleatum      | Weighted mode             | 37 | -0.2517 | 0.6150 | 0.6848 | 0.0032  | 0.0442 | 0.9432 | 24.9409 | 0.8961 | 2.6042     |
| Stroke | log_s_Fusobacterium_periodonticum  | MR Egger                  | 37 | 0.2828  | 0.7977 | 0.7251 | -0.0062 | 0.0475 | 0.8974 | 40.4709 | 0.2415 | 11.5488    |
| Stroke | log_s_Fusobacterium_periodonticum  | Weighted median           | 37 | 0.2296  | 0.3651 | 0.5294 | -0.0062 | 0.0475 | 0.8974 | 40.4709 | 0.2415 | 11.5488    |
| Stroke | log_s_Fusobacterium_periodonticum  | Inverse variance weighted | 37 | 0.1848  | 0.2559 | 0.4702 | -0.0062 | 0.0475 | 0.8974 | 40.4709 | 0.2415 | 11.5488    |
| Stroke | log_s_Fusobacterium_periodonticum  | Simple mode               | 37 | 0.2905  | 0.7384 | 0.6964 | -0.0062 | 0.0475 | 0.8974 | 40.4709 | 0.2415 | 11.5488    |
| Stroke | log_s_Fusobacterium_periodonticum  | Weighted mode             | 37 | 0.4026  | 0.6059 | 0.5106 | -0.0062 | 0.0475 | 0.8974 | 40.4709 | 0.2415 | 11.5488    |
| Stroke | log_s_Fusobacterium_ulcerans       | MR Egger                  | 37 | -0.6893 | 0.8561 | 0.4261 | 0.0458  | 0.0511 | 0.3762 | 46.1513 | 0.0984 | 17.5254    |
| Stroke | log_s_Fusobacterium_ulcerans       | Weighted median           | 37 | -0.0129 | 0.3487 | 0.9704 | 0.0458  | 0.0511 | 0.3762 | 46.1513 | 0.0984 | 17.5254    |
| Stroke | log_s_Fusobacterium_ulcerans       | Inverse variance weighted | 37 | 0.0358  | 0.2791 | 0.8979 | 0.0458  | 0.0511 | 0.3762 | 46.1513 | 0.0984 | 17.5254    |
| Stroke | log_s_Fusobacterium_ulcerans       | Simple mode               | 37 | 0.0241  | 0.6867 | 0.9722 | 0.0458  | 0.0511 | 0.3762 | 46.1513 | 0.0984 | 17.5254    |
| Stroke | log_s_Fusobacterium_ulcerans       | Weighted mode             | 37 | -0.0472 | 0.5574 | 0.9330 | 0.0458  | 0.0511 | 0.3762 | 46.1513 | 0.0984 | 17.5254    |
| Stroke | log_s_Fusobacterium_varium         | MR Egger                  | 37 | -0.4856 | 0.7431 | 0.5178 | 0.0108  | 0.0443 | 0.8082 | 32.8872 | 0.5705 | 2.9656     |
| Stroke | log_s_Fusobacterium_varium         | Weighted median           | 37 | -0.1759 | 0.3581 | 0.6233 | 0.0108  | 0.0443 | 0.8082 | 32.8872 | 0.5705 | 2.9656     |
| Stroke | log_s_Fusobacterium_varium         | Inverse variance weighted | 37 | -0.3138 | 0.2427 | 0.1961 | 0.0108  | 0.0443 | 0.8082 | 32.8872 | 0.5705 | 2.9656     |
| Stroke | log_s_Fusobacterium_varium         | Simple mode               | 37 | 0.2832  | 0.7530 | 0.7090 | 0.0108  | 0.0443 | 0.8082 | 32.8872 | 0.5705 | 2.9656     |
| Stroke | log_s_Fusobacterium_varium         | Weighted mode             | 37 | 0.0514  | 0.6828 | 0.9404 | 0.0108  | 0.0443 | 0.8082 | 32.8872 | 0.5705 | 2.9656     |
| Stroke | log_s_Gemella_haemolysans          | MR Egger                  | 37 | -0.3625 | 0.8627 | 0.6769 | 0.0331  | 0.0514 | 0.5238 | 47.7948 | 0.0732 | 87659.1001 |
| Stroke | log_s_Gemella_haemolysans          | Weighted median           | 37 | 0.5383  | 0.3749 | 0.1510 | 0.0331  | 0.0514 | 0.5238 | 47.7948 | 0.0732 | 87659.1001 |
| Stroke | log_s_Gemella_haemolysans          | Inverse variance weighted | 37 | 0.1628  | 0.2785 | 0.5589 | 0.0331  | 0.0514 | 0.5238 | 47.7948 | 0.0732 | 87659.1001 |
| Stroke | log_s_Gemella_haemolysans          | Simple mode               | 37 | 1.0591  | 0.8253 | 0.2076 | 0.0331  | 0.0514 | 0.5238 | 47.7948 | 0.0732 | 87659.1001 |
| Stroke | log_s_Gemella_haemolysans          | Weighted mode             | 37 | 1.1956  | 0.8548 | 0.1705 | 0.0331  | 0.0514 | 0.5238 | 47.7948 | 0.0732 | 87659.1001 |
| Stroke | log_s_Lactobacillus_amylovorus     | MR Egger                  | 37 | -0.1591 | 0.7677 | 0.8370 | 0.0114  | 0.0458 | 0.8056 | 37.1820 | 0.3688 | 5.3470     |
| Stroke | log_s_Lactobacillus_amylovorus     | Weighted median           | 37 | 0.1131  | 0.3747 | 0.7628 | 0.0114  | 0.0458 | 0.8056 | 37.1820 | 0.3688 | 5.3470     |
| Stroke | log_s_Lactobacillus_amylovorus     | Inverse variance weighted | 37 | 0.0209  | 0.2474 | 0.9328 | 0.0114  | 0.0458 | 0.8056 | 37.1820 | 0.3688 | 5.3470     |

|        |                                   |                           |    |         |        |        |         |        |        |         |        |           |
|--------|-----------------------------------|---------------------------|----|---------|--------|--------|---------|--------|--------|---------|--------|-----------|
| Stroke | log_s_Lactobacillus_amylovorus    | Simple mode               | 37 | 0.6832  | 0.7465 | 0.3662 | 0.0114  | 0.0458 | 0.8056 | 37.1820 | 0.3688 | 5.3470    |
| Stroke | log_s_Lactobacillus_amylovorus    | Weighted mode             | 37 | 0.5242  | 0.7068 | 0.4631 | 0.0114  | 0.0458 | 0.8056 | 37.1820 | 0.3688 | 5.3470    |
| Stroke | log_s_Lactobacillus_casei         | MR Egger                  | 37 | -0.1385 | 0.7477 | 0.8541 | -0.0248 | 0.0446 | 0.5816 | 31.2363 | 0.6505 | -157.1112 |
| Stroke | log_s_Lactobacillus_casei         | Weighted median           | 37 | -0.3611 | 0.3587 | 0.3140 | -0.0248 | 0.0446 | 0.5816 | 31.2363 | 0.6505 | -157.1112 |
| Stroke | log_s_Lactobacillus_casei         | Inverse variance weighted | 37 | -0.5318 | 0.2434 | 0.0289 | -0.0248 | 0.0446 | 0.5816 | 31.2363 | 0.6505 | -157.1112 |
| Stroke | log_s_Lactobacillus_casei         | Simple mode               | 37 | -0.1852 | 0.6891 | 0.7896 | -0.0248 | 0.0446 | 0.5816 | 31.2363 | 0.6505 | -157.1112 |
| Stroke | log_s_Lactobacillus_casei         | Weighted mode             | 37 | -0.1604 | 0.5875 | 0.7864 | -0.0248 | 0.0446 | 0.5816 | 31.2363 | 0.6505 | -157.1112 |
| Stroke | log_s_Lactobacillus_crispatus     | MR Egger                  | 37 | -0.6645 | 0.8193 | 0.4228 | 0.0677  | 0.0488 | 0.1742 | 42.8814 | 0.1999 | 1459.2231 |
| Stroke | log_s_Lactobacillus_crispatus     | Weighted median           | 37 | 0.8889  | 0.3784 | 0.0188 | 0.0677  | 0.0488 | 0.1742 | 42.8814 | 0.1999 | 1459.2231 |
| Stroke | log_s_Lactobacillus_crispatus     | Inverse variance weighted | 37 | 0.4101  | 0.2696 | 0.1282 | 0.0677  | 0.0488 | 0.1742 | 42.8814 | 0.1999 | 1459.2231 |
| Stroke | log_s_Lactobacillus_crispatus     | Simple mode               | 37 | 1.0166  | 0.7205 | 0.1668 | 0.0677  | 0.0488 | 0.1742 | 42.8814 | 0.1999 | 1459.2231 |
| Stroke | log_s_Lactobacillus_crispatus     | Weighted mode             | 37 | 1.0166  | 0.6549 | 0.1294 | 0.0677  | 0.0488 | 0.1742 | 42.8814 | 0.1999 | 1459.2231 |
| Stroke | log_s_Lactobacillus_delbrueckii   | MR Egger                  | 37 | -0.4829 | 0.7404 | 0.5185 | 0.0309  | 0.0441 | 0.4885 | 27.0423 | 0.8298 | 3.9960    |
| Stroke | log_s_Lactobacillus_delbrueckii   | Weighted median           | 37 | 0.1022  | 0.3578 | 0.7752 | 0.0309  | 0.0441 | 0.4885 | 27.0423 | 0.8298 | 3.9960    |
| Stroke | log_s_Lactobacillus_delbrueckii   | Inverse variance weighted | 37 | 0.0073  | 0.2406 | 0.9757 | 0.0309  | 0.0441 | 0.4885 | 27.0423 | 0.8298 | 3.9960    |
| Stroke | log_s_Lactobacillus_delbrueckii   | Simple mode               | 37 | 0.2797  | 0.7275 | 0.7029 | 0.0309  | 0.0441 | 0.4885 | 27.0423 | 0.8298 | 3.9960    |
| Stroke | log_s_Lactobacillus_delbrueckii   | Weighted mode             | 37 | 0.2126  | 0.6951 | 0.7614 | 0.0309  | 0.0441 | 0.4885 | 27.0423 | 0.8298 | 3.9960    |
| Stroke | log_s_Lactobacillus_fermentum     | MR Egger                  | 37 | 0.2303  | 0.7645 | 0.7650 | -0.0181 | 0.0456 | 0.6937 | 37.3910 | 0.3598 | 6.5066    |
| Stroke | log_s_Lactobacillus_fermentum     | Weighted median           | 37 | 0.4607  | 0.3635 | 0.2051 | -0.0181 | 0.0456 | 0.6937 | 37.3910 | 0.3598 | 6.5066    |
| Stroke | log_s_Lactobacillus_fermentum     | Inverse variance weighted | 37 | -0.0566 | 0.2468 | 0.8187 | -0.0181 | 0.0456 | 0.6937 | 37.3910 | 0.3598 | 6.5066    |
| Stroke | log_s_Lactobacillus_fermentum     | Simple mode               | 37 | 0.7337  | 0.7114 | 0.3093 | -0.0181 | 0.0456 | 0.6937 | 37.3910 | 0.3598 | 6.5066    |
| Stroke | log_s_Lactobacillus_fermentum     | Weighted mode             | 37 | 0.5393  | 0.5929 | 0.3691 | -0.0181 | 0.0456 | 0.6937 | 37.3910 | 0.3598 | 6.5066    |
| Stroke | log_s_Lactobacillus_gasseri       | MR Egger                  | 37 | -1.0111 | 0.8134 | 0.2221 | 0.0652  | 0.0485 | 0.1877 | 45.1246 | 0.1416 | 12.8821   |
| Stroke | log_s_Lactobacillus_gasseri       | Weighted median           | 37 | -0.2714 | 0.3611 | 0.4523 | 0.0652  | 0.0485 | 0.1877 | 45.1246 | 0.1416 | 12.8821   |
| Stroke | log_s_Lactobacillus_gasseri       | Inverse variance weighted | 37 | 0.0222  | 0.2681 | 0.9339 | 0.0652  | 0.0485 | 0.1877 | 45.1246 | 0.1416 | 12.8821   |
| Stroke | log_s_Lactobacillus_gasseri       | Simple mode               | 37 | -0.4231 | 0.6878 | 0.5423 | 0.0652  | 0.0485 | 0.1877 | 45.1246 | 0.1416 | 12.8821   |
| Stroke | log_s_Lactobacillus_gasseri       | Weighted mode             | 37 | -0.4008 | 0.5430 | 0.4652 | 0.0652  | 0.0485 | 0.1877 | 45.1246 | 0.1416 | 12.8821   |
| Stroke | log_s_Lactobacillus_reuteri       | MR Egger                  | 37 | -0.1574 | 0.7344 | 0.8315 | 0.0149  | 0.0438 | 0.7358 | 32.0387 | 0.6118 | 7.2931    |
| Stroke | log_s_Lactobacillus_reuteri       | Weighted median           | 37 | 0.2425  | 0.3471 | 0.4849 | 0.0149  | 0.0438 | 0.7358 | 32.0387 | 0.6118 | 7.2931    |
| Stroke | log_s_Lactobacillus_reuteri       | Inverse variance weighted | 37 | 0.0786  | 0.2399 | 0.7432 | 0.0149  | 0.0438 | 0.7358 | 32.0387 | 0.6118 | 7.2931    |
| Stroke | log_s_Lactobacillus_reuteri       | Simple mode               | 37 | 0.5933  | 0.6647 | 0.3780 | 0.0149  | 0.0438 | 0.7358 | 32.0387 | 0.6118 | 7.2931    |
| Stroke | log_s_Lactobacillus_reuteri       | Weighted mode             | 37 | 0.2087  | 0.5795 | 0.7208 | 0.0149  | 0.0438 | 0.7358 | 32.0387 | 0.6118 | 7.2931    |
| Stroke | log_s_Lactobacillus_vaginalis     | MR Egger                  | 37 | -0.6576 | 0.7336 | 0.3762 | 0.0515  | 0.0437 | 0.2467 | 36.2346 | 0.4577 | 7.6586    |
| Stroke | log_s_Lactobacillus_vaginalis     | Weighted median           | 37 | 0.1089  | 0.3470 | 0.7537 | 0.0515  | 0.0437 | 0.2467 | 36.2346 | 0.4577 | 7.6586    |
| Stroke | log_s_Lactobacillus_vaginalis     | Inverse variance weighted | 37 | 0.1594  | 0.2399 | 0.5063 | 0.0515  | 0.0437 | 0.2467 | 36.2346 | 0.4577 | 7.6586    |
| Stroke | log_s_Lactobacillus_vaginalis     | Simple mode               | 37 | -0.3681 | 0.6830 | 0.5933 | 0.0515  | 0.0437 | 0.2467 | 36.2346 | 0.4577 | 7.6586    |
| Stroke | log_s_Lactobacillus_vaginalis     | Weighted mode             | 37 | -0.3906 | 0.6679 | 0.5623 | 0.0515  | 0.0437 | 0.2467 | 36.2346 | 0.4577 | 7.6586    |
| Stroke | log_s_Lawsonia_intracellularis    | MR Egger                  | 37 | 0.4461  | 0.7522 | 0.5570 | -0.0145 | 0.0449 | 0.7492 | 31.7277 | 0.6269 | 34.6049   |
| Stroke | log_s_Lawsonia_intracellularis    | Weighted median           | 37 | 0.3347  | 0.3644 | 0.3583 | -0.0145 | 0.0449 | 0.7492 | 31.7277 | 0.6269 | 34.6049   |
| Stroke | log_s_Lawsonia_intracellularis    | Inverse variance weighted | 37 | 0.2169  | 0.2453 | 0.3766 | -0.0145 | 0.0449 | 0.7492 | 31.7277 | 0.6269 | 34.6049   |
| Stroke | log_s_Lawsonia_intracellularis    | Simple mode               | 37 | 0.5334  | 0.7158 | 0.4610 | -0.0145 | 0.0449 | 0.7492 | 31.7277 | 0.6269 | 34.6049   |
| Stroke | log_s_Lawsonia_intracellularis    | Weighted mode             | 37 | 0.5926  | 0.6804 | 0.3896 | -0.0145 | 0.0449 | 0.7492 | 31.7277 | 0.6269 | 34.6049   |
| Stroke | log_s_Leuconostoc_mesenteroides   | MR Egger                  | 37 | -0.0842 | 0.7467 | 0.9108 | 0.0092  | 0.0445 | 0.8373 | 30.5377 | 0.6834 | 19.9025   |
| Stroke | log_s_Leuconostoc_mesenteroides   | Weighted median           | 37 | 0.2289  | 0.3497 | 0.5129 | 0.0092  | 0.0445 | 0.8373 | 30.5377 | 0.6834 | 19.9025   |
| Stroke | log_s_Leuconostoc_mesenteroides   | Inverse variance weighted | 37 | 0.0619  | 0.2424 | 0.7984 | 0.0092  | 0.0445 | 0.8373 | 30.5377 | 0.6834 | 19.9025   |
| Stroke | log_s_Leuconostoc_mesenteroides   | Simple mode               | 37 | 1.0450  | 0.7930 | 0.1959 | 0.0092  | 0.0445 | 0.8373 | 30.5377 | 0.6834 | 19.9025   |
| Stroke | log_s_Leuconostoc_mesenteroides   | Weighted mode             | 37 | 0.8335  | 0.7409 | 0.2681 | 0.0092  | 0.0445 | 0.8373 | 30.5377 | 0.6834 | 19.9025   |
| Stroke | log_s_Methylobacillus_flagellatus | MR Egger                  | 37 | -1.9346 | 0.8132 | 0.0230 | 0.0966  | 0.0483 | 0.0532 | 44.7898 | 0.1494 | -143.8506 |
| Stroke | log_s_Methylobacillus_flagellatus | Weighted median           | 37 | -0.0474 | 0.3651 | 0.8967 | 0.0966  | 0.0483 | 0.0532 | 44.7898 | 0.1494 | -143.8506 |
| Stroke | log_s_Methylobacillus_flagellatus | Inverse variance weighted | 37 | -0.3924 | 0.2700 | 0.1462 | 0.0966  | 0.0483 | 0.0532 | 44.7898 | 0.1494 | -143.8506 |
| Stroke | log_s_Methylobacillus_flagellatus | Simple mode               | 37 | -0.0023 | 0.6798 | 0.9973 | 0.0966  | 0.0483 | 0.0532 | 44.7898 | 0.1494 | -143.8506 |
| Stroke | log_s_Methylobacillus_flagellatus | Weighted mode             | 37 | 0.0194  | 0.6767 | 0.9773 | 0.0966  | 0.0483 | 0.0532 | 44.7898 | 0.1494 | -143.8506 |
| Stroke | log_s_Mobiluncus_mulieris         | MR Egger                  | 37 | -0.4077 | 0.7757 | 0.6025 | 0.0381  | 0.0463 | 0.4163 | 37.5037 | 0.3551 | 3.3281    |
| Stroke | log_s_Mobiluncus_mulieris         | Weighted median           | 37 | -0.1206 | 0.3527 | 0.7324 | 0.0381  | 0.0463 | 0.4163 | 37.5037 | 0.3551 | 3.3281    |
| Stroke | log_s_Mobiluncus_mulieris         | Inverse variance weighted | 37 | 0.1954  | 0.2522 | 0.4386 | 0.0381  | 0.0463 | 0.4163 | 37.5037 | 0.3551 | 3.3281    |
| Stroke | log_s_Mobiluncus_mulieris         | Simple mode               | 37 | -0.0635 | 0.7889 | 0.9363 | 0.0381  | 0.0463 | 0.4163 | 37.5037 | 0.3551 | 3.3281    |
| Stroke | log_s_Mobiluncus_mulieris         | Weighted mode             | 37 | -0.2772 | 0.6305 | 0.6628 | 0.0381  | 0.0463 | 0.4163 | 37.5037 | 0.3551 | 3.3281    |
| Stroke | log_s_Neisseria_flavescens        | MR Egger                  | 37 | -0.2043 | 0.7374 | 0.7834 | 0.0053  | 0.0440 | 0.9041 | 31.9218 | 0.6175 | 2.4799    |
| Stroke | log_s_Neisseria_flavescens        | Weighted median           | 37 | -0.0808 | 0.3455 | 0.8152 | 0.0053  | 0.0440 | 0.9041 | 31.9218 | 0.6175 | 2.4799    |
| Stroke | log_s_Neisseria_flavescens        | Inverse variance weighted | 37 | -0.1197 | 0.2409 | 0.6194 | 0.0053  | 0.0440 | 0.9041 | 31.9218 | 0.6175 | 2.4799    |
| Stroke | log_s_Neisseria_flavescens        | Simple mode               | 37 | -0.1311 | 0.7887 | 0.8689 | 0.0053  | 0.0440 | 0.9041 | 31.9218 | 0.6175 | 2.4799    |

|        |                                   |                           |    |         |        |        |         |        |        |         |        |            |
|--------|-----------------------------------|---------------------------|----|---------|--------|--------|---------|--------|--------|---------|--------|------------|
| Stroke | log_s_Neisseria_flavescens        | Weighted mode             | 37 | -0.1125 | 0.7045 | 0.8740 | 0.0053  | 0.0440 | 0.9041 | 31.9218 | 0.6175 | 2.4799     |
| Stroke | log_s_Neisseria_gonorrhoeae       | MR Egger                  | 37 | 0.2130  | 0.7421 | 0.7758 | -0.0029 | 0.0442 | 0.9487 | 27.7600 | 0.8029 | 3268.4267  |
| Stroke | log_s_Neisseria_gonorrhoeae       | Weighted median           | 37 | 0.1169  | 0.3485 | 0.7373 | -0.0029 | 0.0442 | 0.9487 | 27.7600 | 0.8029 | 3268.4267  |
| Stroke | log_s_Neisseria_gonorrhoeae       | Inverse variance weighted | 37 | 0.1675  | 0.2419 | 0.4888 | -0.0029 | 0.0442 | 0.9487 | 27.7600 | 0.8029 | 3268.4267  |
| Stroke | log_s_Neisseria_gonorrhoeae       | Simple mode               | 37 | 0.1716  | 0.6650 | 0.7978 | -0.0029 | 0.0442 | 0.9487 | 27.7600 | 0.8029 | 3268.4267  |
| Stroke | log_s_Neisseria_gonorrhoeae       | Weighted mode             | 37 | 0.1919  | 0.5705 | 0.7386 | -0.0029 | 0.0442 | 0.9487 | 27.7600 | 0.8029 | 3268.4267  |
| Stroke | log_s_Neisseria_meningitidis      | MR Egger                  | 37 | -1.5257 | 0.7497 | 0.0495 | 0.0757  | 0.0447 | 0.0988 | 35.5832 | 0.4883 | 9.7555     |
| Stroke | log_s_Neisseria_meningitidis      | Weighted median           | 37 | -0.5363 | 0.3577 | 0.1337 | 0.0757  | 0.0447 | 0.0988 | 35.5832 | 0.4883 | 9.7555     |
| Stroke | log_s_Neisseria_meningitidis      | Inverse variance weighted | 37 | -0.3234 | 0.2434 | 0.1840 | 0.0757  | 0.0447 | 0.0988 | 35.5832 | 0.4883 | 9.7555     |
| Stroke | log_s_Neisseria_meningitidis      | Simple mode               | 37 | -0.5752 | 0.7644 | 0.4567 | 0.0757  | 0.0447 | 0.0988 | 35.5832 | 0.4883 | 9.7555     |
| Stroke | log_s_Neisseria_meningitidis      | Weighted mode             | 37 | -0.9036 | 0.6556 | 0.1766 | 0.0757  | 0.0447 | 0.0988 | 35.5832 | 0.4883 | 9.7555     |
| Stroke | log_s_Neisseria_mucosa            | MR Egger                  | 37 | -0.7306 | 0.8294 | 0.3844 | 0.0356  | 0.0494 | 0.4758 | 43.3994 | 0.1559 | -6159.7387 |
| Stroke | log_s_Neisseria_mucosa            | Weighted median           | 37 | -0.2656 | 0.3632 | 0.4646 | 0.0356  | 0.0494 | 0.4758 | 43.3994 | 0.1559 | -6159.7387 |
| Stroke | log_s_Neisseria_mucosa            | Inverse variance weighted | 37 | -0.1655 | 0.2687 | 0.5380 | 0.0356  | 0.0494 | 0.4758 | 43.3994 | 0.1559 | -6159.7387 |
| Stroke | log_s_Neisseria_mucosa            | Simple mode               | 37 | -0.0059 | 0.8172 | 0.9943 | 0.0356  | 0.0494 | 0.4758 | 43.3994 | 0.1559 | -6159.7387 |
| Stroke | log_s_Neisseria_mucosa            | Weighted mode             | 37 | -0.1311 | 0.6510 | 0.8415 | 0.0356  | 0.0494 | 0.4758 | 43.3994 | 0.1559 | -6159.7387 |
| Stroke | log_s_Neisseria_subflava          | MR Egger                  | 37 | -0.8851 | 0.7382 | 0.2386 | 0.0484  | 0.0440 | 0.2792 | 27.7216 | 0.8370 | 1.6136     |
| Stroke | log_s_Neisseria_subflava          | Weighted median           | 37 | -0.2114 | 0.3388 | 0.5327 | 0.0484  | 0.0440 | 0.2792 | 27.7216 | 0.8370 | 1.6136     |
| Stroke | log_s_Neisseria_subflava          | Inverse variance weighted | 37 | -0.1180 | 0.2407 | 0.6239 | 0.0484  | 0.0440 | 0.2792 | 27.7216 | 0.8370 | 1.6136     |
| Stroke | log_s_Neisseria_subflava          | Simple mode               | 37 | -0.1805 | 0.6867 | 0.7941 | 0.0484  | 0.0440 | 0.2792 | 27.7216 | 0.8370 | 1.6136     |
| Stroke | log_s_Neisseria_subflava          | Weighted mode             | 37 | -0.3792 | 0.5809 | 0.5180 | 0.0484  | 0.0440 | 0.2792 | 27.7216 | 0.8370 | 1.6136     |
| Stroke | log_s_Oscillibacter_valericigenes | MR Egger                  | 37 | 0.1764  | 0.8134 | 0.8296 | -0.0094 | 0.0485 | 0.8481 | 41.7755 | 0.2001 | 7.4637     |
| Stroke | log_s_Oscillibacter_valericigenes | Weighted median           | 37 | 0.0917  | 0.3376 | 0.7858 | -0.0094 | 0.0485 | 0.8481 | 41.7755 | 0.2001 | 7.4637     |
| Stroke | log_s_Oscillibacter_valericigenes | Inverse variance weighted | 37 | 0.0280  | 0.2619 | 0.9150 | -0.0094 | 0.0485 | 0.8481 | 41.7755 | 0.2001 | 7.4637     |
| Stroke | log_s_Oscillibacter_valericigenes | Simple mode               | 37 | 0.2177  | 0.7300 | 0.7673 | -0.0094 | 0.0485 | 0.8481 | 41.7755 | 0.2001 | 7.4637     |
| Stroke | log_s_Oscillibacter_valericigenes | Weighted mode             | 37 | 0.0516  | 0.5620 | 0.9274 | -0.0094 | 0.0485 | 0.8481 | 41.7755 | 0.2001 | 7.4637     |
| Stroke | log_s_Pantoea_ananatis            | MR Egger                  | 37 | -0.0483 | 0.9785 | 0.9609 | -0.0030 | 0.0583 | 0.9590 | 60.7245 | 0.0045 | 299.7302   |
| Stroke | log_s_Pantoea_ananatis            | Weighted median           | 37 | 0.0444  | 0.3680 | 0.9039 | -0.0030 | 0.0583 | 0.9590 | 60.7245 | 0.0045 | 299.7302   |
| Stroke | log_s_Pantoea_ananatis            | Inverse variance weighted | 37 | -0.0963 | 0.3125 | 0.7580 | -0.0030 | 0.0583 | 0.9590 | 60.7245 | 0.0045 | 299.7302   |
| Stroke | log_s_Pantoea_ananatis            | Simple mode               | 37 | 0.4293  | 0.8430 | 0.6136 | -0.0030 | 0.0583 | 0.9590 | 60.7245 | 0.0045 | 299.7302   |
| Stroke | log_s_Pantoea_ananatis            | Weighted mode             | 37 | 0.2131  | 0.7914 | 0.7892 | -0.0030 | 0.0583 | 0.9590 | 60.7245 | 0.0045 | 299.7302   |
| Stroke | log_s_Peptoniphilus_duerdenii     | MR Egger                  | 37 | -0.3072 | 0.7483 | 0.6839 | 0.0234  | 0.0446 | 0.6027 | 29.3532 | 0.7370 | 31.6792    |
| Stroke | log_s_Peptoniphilus_duerdenii     | Weighted median           | 37 | 0.1365  | 0.3430 | 0.6907 | 0.0234  | 0.0446 | 0.6027 | 29.3532 | 0.7370 | 31.6792    |
| Stroke | log_s_Peptoniphilus_duerdenii     | Inverse variance weighted | 37 | 0.0644  | 0.2437 | 0.7914 | 0.0234  | 0.0446 | 0.6027 | 29.3532 | 0.7370 | 31.6792    |
| Stroke | log_s_Peptoniphilus_duerdenii     | Simple mode               | 37 | 0.5985  | 0.7538 | 0.4324 | 0.0234  | 0.0446 | 0.6027 | 29.3532 | 0.7370 | 31.6792    |
| Stroke | log_s_Peptoniphilus_duerdenii     | Weighted mode             | 37 | -0.8220 | 0.6647 | 0.2242 | 0.0234  | 0.0446 | 0.6027 | 29.3532 | 0.7370 | 31.6792    |
| Stroke | log_s_Peptoniphilus_hareii        | MR Egger                  | 37 | 0.7367  | 0.7484 | 0.3317 | -0.0274 | 0.0447 | 0.5435 | 34.7962 | 0.4779 | 6.0451     |
| Stroke | log_s_Peptoniphilus_hareii        | Weighted median           | 37 | 0.5484  | 0.3612 | 0.1290 | -0.0274 | 0.0447 | 0.5435 | 34.7962 | 0.4779 | 6.0451     |
| Stroke | log_s_Peptoniphilus_hareii        | Inverse variance weighted | 37 | 0.3028  | 0.2449 | 0.2162 | -0.0274 | 0.0447 | 0.5435 | 34.7962 | 0.4779 | 6.0451     |
| Stroke | log_s_Peptoniphilus_hareii        | Simple mode               | 37 | 0.8774  | 0.7175 | 0.2293 | -0.0274 | 0.0447 | 0.5435 | 34.7962 | 0.4779 | 6.0451     |
| Stroke | log_s_Peptoniphilus_hareii        | Weighted mode             | 37 | 0.8774  | 0.6686 | 0.1977 | -0.0274 | 0.0447 | 0.5435 | 34.7962 | 0.4779 | 6.0451     |
| Stroke | log_s_Porphyromonas_endodontalis  | MR Egger                  | 37 | 0.5868  | 0.7359 | 0.4306 | -0.0122 | 0.0439 | 0.7819 | 35.1494 | 0.4611 | -252.2385  |
| Stroke | log_s_Porphyromonas_endodontalis  | Weighted median           | 37 | 0.5042  | 0.3427 | 0.1413 | -0.0122 | 0.0439 | 0.7819 | 35.1494 | 0.4611 | -252.2385  |
| Stroke | log_s_Porphyromonas_endodontalis  | Inverse variance weighted | 37 | 0.3928  | 0.2398 | 0.1015 | -0.0122 | 0.0439 | 0.7819 | 35.1494 | 0.4611 | -252.2385  |
| Stroke | log_s_Porphyromonas_endodontalis  | Simple mode               | 37 | 0.5342  | 0.6590 | 0.4229 | -0.0122 | 0.0439 | 0.7819 | 35.1494 | 0.4611 | -252.2385  |
| Stroke | log_s_Porphyromonas_endodontalis  | Weighted mode             | 37 | 0.4714  | 0.5381 | 0.3868 | -0.0122 | 0.0439 | 0.7819 | 35.1494 | 0.4611 | -252.2385  |
| Stroke | log_s_Porphyromonas_gingivalis    | MR Egger                  | 37 | -0.1644 | 0.7394 | 0.8254 | 0.0312  | 0.0441 | 0.4839 | 29.0829 | 0.7488 | 2.3355     |
| Stroke | log_s_Porphyromonas_gingivalis    | Weighted median           | 37 | 0.1171  | 0.3486 | 0.7369 | 0.0312  | 0.0441 | 0.4839 | 29.0829 | 0.7488 | 2.3355     |
| Stroke | log_s_Porphyromonas_gingivalis    | Inverse variance weighted | 37 | 0.3300  | 0.2417 | 0.1721 | 0.0312  | 0.0441 | 0.4839 | 29.0829 | 0.7488 | 2.3355     |
| Stroke | log_s_Porphyromonas_gingivalis    | Simple mode               | 37 | 0.0952  | 0.6763 | 0.8888 | 0.0312  | 0.0441 | 0.4839 | 29.0829 | 0.7488 | 2.3355     |
| Stroke | log_s_Porphyromonas_gingivalis    | Weighted mode             | 37 | -0.1763 | 0.5940 | 0.7683 | 0.0312  | 0.0441 | 0.4839 | 29.0829 | 0.7488 | 2.3355     |
| Stroke | log_s_Porphyromonas_uenonis       | MR Egger                  | 37 | 0.7871  | 0.8217 | 0.3447 | -0.0322 | 0.0490 | 0.5152 | 41.4310 | 0.2105 | 11.5972    |
| Stroke | log_s_Porphyromonas_uenonis       | Weighted median           | 37 | 0.1400  | 0.3845 | 0.7157 | -0.0322 | 0.0490 | 0.5152 | 41.4310 | 0.2105 | 11.5972    |
| Stroke | log_s_Porphyromonas_uenonis       | Inverse variance weighted | 37 | 0.2765  | 0.2668 | 0.3000 | -0.0322 | 0.0490 | 0.5152 | 41.4310 | 0.2105 | 11.5972    |
| Stroke | log_s_Porphyromonas_uenonis       | Simple mode               | 37 | 1.3965  | 0.9159 | 0.1361 | -0.0322 | 0.0490 | 0.5152 | 41.4310 | 0.2105 | 11.5972    |
| Stroke | log_s_Porphyromonas_uenonis       | Weighted mode             | 37 | -0.0550 | 0.7200 | 0.9396 | -0.0322 | 0.0490 | 0.5152 | 41.4310 | 0.2105 | 11.5972    |
| Stroke | log_s_Prevotella_amnii            | MR Egger                  | 37 | -0.0086 | 0.7442 | 0.9909 | 0.0135  | 0.0444 | 0.7634 | 34.8696 | 0.4744 | 53.1419    |
| Stroke | log_s_Prevotella_amnii            | Weighted median           | 37 | -0.0653 | 0.3457 | 0.8501 | 0.0135  | 0.0444 | 0.7634 | 34.8696 | 0.4744 | 53.1419    |
| Stroke | log_s_Prevotella_amnii            | Inverse variance weighted | 37 | 0.2049  | 0.2421 | 0.3973 | 0.0135  | 0.0444 | 0.7634 | 34.8696 | 0.4744 | 53.1419    |
| Stroke | log_s_Prevotella_amnii            | Simple mode               | 37 | 0.0715  | 0.7271 | 0.9222 | 0.0135  | 0.0444 | 0.7634 | 34.8696 | 0.4744 | 53.1419    |
| Stroke | log_s_Prevotella_amnii            | Weighted mode             | 37 | -0.0727 | 0.6060 | 0.9052 | 0.0135  | 0.0444 | 0.7634 | 34.8696 | 0.4744 | 53.1419    |

|        |                                     |                           |    |         |        |        |         |        |        |         |        |          |
|--------|-------------------------------------|---------------------------|----|---------|--------|--------|---------|--------|--------|---------|--------|----------|
| Stroke | log_s_Prevotella_bryantii           | MR Egger                  | 37 | -0.2078 | 0.7794 | 0.7913 | 0.0115  | 0.0464 | 0.8058 | 39.1873 | 0.2875 | -17.5071 |
| Stroke | log_s_Prevotella_bryantii           | Weighted median           | 37 | -0.2139 | 0.3455 | 0.5359 | 0.0115  | 0.0464 | 0.8058 | 39.1873 | 0.2875 | -17.5071 |
| Stroke | log_s_Prevotella_bryantii           | Inverse variance weighted | 37 | -0.0253 | 0.2504 | 0.9196 | 0.0115  | 0.0464 | 0.8058 | 39.1873 | 0.2875 | -17.5071 |
| Stroke | log_s_Prevotella_bryantii           | Simple mode               | 37 | -0.3117 | 0.6307 | 0.6242 | 0.0115  | 0.0464 | 0.8058 | 39.1873 | 0.2875 | -17.5071 |
| Stroke | log_s_Prevotella_bryantii           | Weighted mode             | 37 | -0.2490 | 0.6003 | 0.6807 | 0.0115  | 0.0464 | 0.8058 | 39.1873 | 0.2875 | -17.5071 |
| Stroke | log_s_Prevotella_dentalis           | MR Egger                  | 37 | -0.1081 | 0.7336 | 0.8837 | -0.0013 | 0.0438 | 0.9759 | 26.2634 | 0.8565 | 4.3077   |
| Stroke | log_s_Prevotella_dentalis           | Weighted median           | 37 | -0.1625 | 0.3521 | 0.6445 | -0.0013 | 0.0438 | 0.9759 | 26.2634 | 0.8565 | 4.3077   |
| Stroke | log_s_Prevotella_dentalis           | Inverse variance weighted | 37 | -0.1292 | 0.2398 | 0.5900 | -0.0013 | 0.0438 | 0.9759 | 26.2634 | 0.8565 | 4.3077   |
| Stroke | log_s_Prevotella_dentalis           | Simple mode               | 37 | -0.1113 | 0.6770 | 0.8703 | -0.0013 | 0.0438 | 0.9759 | 26.2634 | 0.8565 | 4.3077   |
| Stroke | log_s_Prevotella_dentalis           | Weighted mode             | 37 | -0.0756 | 0.6037 | 0.9011 | -0.0013 | 0.0438 | 0.9759 | 26.2634 | 0.8565 | 4.3077   |
| Stroke | log_s_Prevotella_marshii            | MR Egger                  | 37 | 0.2715  | 0.8197 | 0.7424 | -0.0220 | 0.0489 | 0.6553 | 43.2796 | 0.1589 | 86.0708  |
| Stroke | log_s_Prevotella_marshii            | Weighted median           | 37 | -0.3884 | 0.3660 | 0.2886 | -0.0220 | 0.0489 | 0.6553 | 43.2796 | 0.1589 | 86.0708  |
| Stroke | log_s_Prevotella_marshii            | Inverse variance weighted | 37 | -0.0774 | 0.2644 | 0.7698 | -0.0220 | 0.0489 | 0.6553 | 43.2796 | 0.1589 | 86.0708  |
| Stroke | log_s_Prevotella_marshii            | Simple mode               | 37 | -0.5879 | 0.6976 | 0.4049 | -0.0220 | 0.0489 | 0.6553 | 43.2796 | 0.1589 | 86.0708  |
| Stroke | log_s_Prevotella_marshii            | Weighted mode             | 37 | -0.4887 | 0.6998 | 0.4894 | -0.0220 | 0.0489 | 0.6553 | 43.2796 | 0.1589 | 86.0708  |
| Stroke | log_s_Prevotella_melaninogenica     | MR Egger                  | 37 | 0.0613  | 0.7385 | 0.9343 | -0.0145 | 0.0440 | 0.7439 | 31.3987 | 0.6427 | 17.8003  |
| Stroke | log_s_Prevotella_melaninogenica     | Weighted median           | 37 | 0.1842  | 0.3533 | 0.6022 | -0.0145 | 0.0440 | 0.7439 | 31.3987 | 0.6427 | 17.8003  |
| Stroke | log_s_Prevotella_melaninogenica     | Inverse variance weighted | 37 | -0.1686 | 0.2409 | 0.4840 | -0.0145 | 0.0440 | 0.7439 | 31.3987 | 0.6427 | 17.8003  |
| Stroke | log_s_Prevotella_melaninogenica     | Simple mode               | 37 | 0.3073  | 0.7340 | 0.6780 | -0.0145 | 0.0440 | 0.7439 | 31.3987 | 0.6427 | 17.8003  |
| Stroke | log_s_Prevotella_melaninogenica     | Weighted mode             | 37 | 0.3453  | 0.6287 | 0.5862 | -0.0145 | 0.0440 | 0.7439 | 31.3987 | 0.6427 | 17.8003  |
| Stroke | log_s_Prevotella_multiformis        | MR Egger                  | 37 | 0.1648  | 0.7362 | 0.8242 | -0.0018 | 0.0439 | 0.9667 | 28.9287 | 0.7554 | 29.9540  |
| Stroke | log_s_Prevotella_multiformis        | Weighted median           | 37 | -0.0017 | 0.3416 | 0.9961 | -0.0018 | 0.0439 | 0.9667 | 28.9287 | 0.7554 | 29.9540  |
| Stroke | log_s_Prevotella_multiformis        | Inverse variance weighted | 37 | 0.1356  | 0.2405 | 0.5730 | -0.0018 | 0.0439 | 0.9667 | 28.9287 | 0.7554 | 29.9540  |
| Stroke | log_s_Prevotella_multiformis        | Simple mode               | 37 | -0.3487 | 0.6687 | 0.6052 | -0.0018 | 0.0439 | 0.9667 | 28.9287 | 0.7554 | 29.9540  |
| Stroke | log_s_Prevotella_multiformis        | Weighted mode             | 37 | -0.1908 | 0.6129 | 0.7573 | -0.0018 | 0.0439 | 0.9667 | 28.9287 | 0.7554 | 29.9540  |
| Stroke | log_s_Prevotella_multisaccharivorax | MR Egger                  | 37 | 0.5007  | 0.8426 | 0.5561 | -0.0385 | 0.0502 | 0.4492 | 45.5923 | 0.1084 | 24.9137  |
| Stroke | log_s_Prevotella_multisaccharivorax | Weighted median           | 37 | -0.2685 | 0.3677 | 0.4653 | -0.0385 | 0.0502 | 0.4492 | 45.5923 | 0.1084 | 24.9137  |
| Stroke | log_s_Prevotella_multisaccharivorax | Inverse variance weighted | 37 | -0.1088 | 0.2735 | 0.6909 | -0.0385 | 0.0502 | 0.4492 | 45.5923 | 0.1084 | 24.9137  |
| Stroke | log_s_Prevotella_multisaccharivorax | Simple mode               | 37 | -0.2399 | 0.6726 | 0.7234 | -0.0385 | 0.0502 | 0.4492 | 45.5923 | 0.1084 | 24.9137  |
| Stroke | log_s_Prevotella_multisaccharivorax | Weighted mode             | 37 | -0.2642 | 0.5651 | 0.6429 | -0.0385 | 0.0502 | 0.4492 | 45.5923 | 0.1084 | 24.9137  |
| Stroke | log_s_Prevotella_nigrescens         | MR Egger                  | 37 | 1.2550  | 0.7347 | 0.0965 | -0.0749 | 0.0438 | 0.0961 | 37.0276 | 0.4213 | 21.1039  |
| Stroke | log_s_Prevotella_nigrescens         | Weighted median           | 37 | 0.3816  | 0.3348 | 0.2543 | -0.0749 | 0.0438 | 0.0961 | 37.0276 | 0.4213 | 21.1039  |
| Stroke | log_s_Prevotella_nigrescens         | Inverse variance weighted | 37 | 0.0677  | 0.2435 | 0.7809 | -0.0749 | 0.0438 | 0.0961 | 37.0276 | 0.4213 | 21.1039  |
| Stroke | log_s_Prevotella_nigrescens         | Simple mode               | 37 | 0.4446  | 0.5965 | 0.4608 | -0.0749 | 0.0438 | 0.0961 | 37.0276 | 0.4213 | 21.1039  |
| Stroke | log_s_Prevotella_nigrescens         | Weighted mode             | 37 | 0.2927  | 0.5273 | 0.5823 | -0.0749 | 0.0438 | 0.0961 | 37.0276 | 0.4213 | 21.1039  |
| Stroke | log_s_Prevotella_pallens            | MR Egger                  | 37 | 0.6053  | 0.7341 | 0.4152 | -0.0330 | 0.0438 | 0.4556 | 24.9131 | 0.8969 | 1.7083   |
| Stroke | log_s_Prevotella_pallens            | Weighted median           | 37 | -0.0705 | 0.3416 | 0.8366 | -0.0330 | 0.0438 | 0.4556 | 24.9131 | 0.8969 | 1.7083   |
| Stroke | log_s_Prevotella_pallens            | Inverse variance weighted | 37 | 0.0818  | 0.2397 | 0.7330 | -0.0330 | 0.0438 | 0.4556 | 24.9131 | 0.8969 | 1.7083   |
| Stroke | log_s_Prevotella_pallens            | Simple mode               | 37 | -0.1319 | 0.5830 | 0.8223 | -0.0330 | 0.0438 | 0.4556 | 24.9131 | 0.8969 | 1.7083   |
| Stroke | log_s_Prevotella_pallens            | Weighted mode             | 37 | -0.0652 | 0.5307 | 0.9029 | -0.0330 | 0.0438 | 0.4556 | 24.9131 | 0.8969 | 1.7083   |
| Stroke | log_s_Prevotella_salivae            | MR Egger                  | 37 | 1.8148  | 0.7427 | 0.0197 | -0.1055 | 0.0442 | 0.0227 | 33.3989 | 0.5929 | 15.5131  |
| Stroke | log_s_Prevotella_salivae            | Weighted median           | 37 | 0.4137  | 0.3632 | 0.2546 | -0.1055 | 0.0442 | 0.0227 | 33.3989 | 0.5929 | 15.5131  |
| Stroke | log_s_Prevotella_salivae            | Inverse variance weighted | 37 | 0.1399  | 0.2410 | 0.5615 | -0.1055 | 0.0442 | 0.0227 | 33.3989 | 0.5929 | 15.5131  |
| Stroke | log_s_Prevotella_salivae            | Simple mode               | 37 | 0.4828  | 0.7794 | 0.5395 | -0.1055 | 0.0442 | 0.0227 | 33.3989 | 0.5929 | 15.5131  |
| Stroke | log_s_Prevotella_salivae            | Weighted mode             | 37 | 0.7263  | 0.8615 | 0.4047 | -0.1055 | 0.0442 | 0.0227 | 33.3989 | 0.5929 | 15.5131  |
| Stroke | log_s_Prevotella_veroralis          | MR Egger                  | 37 | 1.0578  | 0.8502 | 0.2217 | -0.0725 | 0.0507 | 0.1613 | 49.0898 | 0.0716 | 31.0169  |
| Stroke | log_s_Prevotella_veroralis          | Weighted median           | 37 | 0.0366  | 0.3727 | 0.9218 | -0.0725 | 0.0507 | 0.1613 | 49.0898 | 0.0716 | 31.0169  |
| Stroke | log_s_Prevotella_veroralis          | Inverse variance weighted | 37 | -0.0925 | 0.2806 | 0.7417 | -0.0725 | 0.0507 | 0.1613 | 49.0898 | 0.0716 | 31.0169  |
| Stroke | log_s_Prevotella_veroralis          | Simple mode               | 37 | 0.5341  | 0.7163 | 0.4607 | -0.0725 | 0.0507 | 0.1613 | 49.0898 | 0.0716 | 31.0169  |
| Stroke | log_s_Prevotella_veroralis          | Weighted mode             | 37 | 0.3895  | 0.6353 | 0.5437 | -0.0725 | 0.0507 | 0.1613 | 49.0898 | 0.0716 | 31.0169  |
| Stroke | log_s_Pseudomonas_stutzeri          | MR Egger                  | 37 | -0.5296 | 0.8379 | 0.5315 | 0.0408  | 0.0499 | 0.4195 | 44.1577 | 0.1379 | 29.3899  |
| Stroke | log_s_Pseudomonas_stutzeri          | Weighted median           | 37 | 0.1789  | 0.3555 | 0.6148 | 0.0408  | 0.0499 | 0.4195 | 44.1577 | 0.1379 | 29.3899  |
| Stroke | log_s_Pseudomonas_stutzeri          | Inverse variance weighted | 37 | 0.1181  | 0.2701 | 0.6619 | 0.0408  | 0.0499 | 0.4195 | 44.1577 | 0.1379 | 29.3899  |
| Stroke | log_s_Pseudomonas_stutzeri          | Simple mode               | 37 | 0.1678  | 0.7425 | 0.8225 | 0.0408  | 0.0499 | 0.4195 | 44.1577 | 0.1379 | 29.3899  |
| Stroke | log_s_Pseudomonas_stutzeri          | Weighted mode             | 37 | 0.3007  | 0.7817 | 0.7027 | 0.0408  | 0.0499 | 0.4195 | 44.1577 | 0.1379 | 29.3899  |
| Stroke | log_s_Ruminococcus_flavefaciens     | MR Egger                  | 37 | 1.0817  | 0.7477 | 0.1569 | -0.0380 | 0.0446 | 0.3999 | 34.1227 | 0.5103 | 15.6057  |
| Stroke | log_s_Ruminococcus_flavefaciens     | Weighted median           | 37 | 0.6370  | 0.3465 | 0.0660 | -0.0380 | 0.0446 | 0.3999 | 34.1227 | 0.5103 | 15.6057  |
| Stroke | log_s_Ruminococcus_flavefaciens     | Inverse variance weighted | 37 | 0.4792  | 0.2437 | 0.0492 | -0.0380 | 0.0446 | 0.3999 | 34.1227 | 0.5103 | 15.6057  |
| Stroke | log_s_Ruminococcus_flavefaciens     | Simple mode               | 37 | 0.1923  | 0.6567 | 0.7714 | -0.0380 | 0.0446 | 0.3999 | 34.1227 | 0.5103 | 15.6057  |
| Stroke | log_s_Ruminococcus_flavefaciens     | Weighted mode             | 37 | 0.4931  | 0.5715 | 0.3940 | -0.0380 | 0.0446 | 0.3999 | 34.1227 | 0.5103 | 15.6057  |
| Stroke | log_s_Serratia_odorifera            | MR Egger                  | 37 | -1.3147 | 0.7781 | 0.1000 | 0.0870  | 0.0463 | 0.0689 | 42.5731 | 0.2091 | 717.0029 |

|        |                                         |                           |    |         |        |        |         |        |        |         |        |            |
|--------|-----------------------------------------|---------------------------|----|---------|--------|--------|---------|--------|--------|---------|--------|------------|
| Stroke | log_s_Serratia_odorifera                | Weighted median           | 37 | 0.1076  | 0.3584 | 0.7640 | 0.0870  | 0.0463 | 0.0689 | 42.5731 | 0.2091 | 717.0029   |
| Stroke | log_s_Serratia_odorifera                | Inverse variance weighted | 37 | 0.0666  | 0.2611 | 0.7987 | 0.0870  | 0.0463 | 0.0689 | 42.5731 | 0.2091 | 717.0029   |
| Stroke | log_s_Serratia_odorifera                | Simple mode               | 37 | 0.2566  | 0.7554 | 0.7361 | 0.0870  | 0.0463 | 0.0689 | 42.5731 | 0.2091 | 717.0029   |
| Stroke | log_s_Serratia_odorifera                | Weighted mode             | 37 | 0.2112  | 0.7485 | 0.7794 | 0.0870  | 0.0463 | 0.0689 | 42.5731 | 0.2091 | 717.0029   |
| Stroke | log_s_Shewanella_putrefaciens           | MR Egger                  | 37 | -0.3235 | 0.9794 | 0.7432 | 0.0294  | 0.0584 | 0.6182 | 61.6576 | 0.0036 | 18.1434    |
| Stroke | log_s_Shewanella_putrefaciens           | Weighted median           | 37 | -0.0823 | 0.3797 | 0.8285 | 0.0294  | 0.0584 | 0.6182 | 61.6576 | 0.0036 | 18.1434    |
| Stroke | log_s_Shewanella_putrefaciens           | Inverse variance weighted | 37 | 0.1421  | 0.3167 | 0.6538 | 0.0294  | 0.0584 | 0.6182 | 61.6576 | 0.0036 | 18.1434    |
| Stroke | log_s_Shewanella_putrefaciens           | Simple mode               | 37 | -0.3583 | 0.8584 | 0.6789 | 0.0294  | 0.0584 | 0.6182 | 61.6576 | 0.0036 | 18.1434    |
| Stroke | log_s_Shewanella_putrefaciens           | Weighted mode             | 37 | -0.3895 | 0.7833 | 0.6220 | 0.0294  | 0.0584 | 0.6182 | 61.6576 | 0.0036 | 18.1434    |
| Stroke | log_s_Slackia_exigua                    | MR Egger                  | 37 | -0.4596 | 0.7983 | 0.5685 | 0.0410  | 0.0476 | 0.3950 | 40.8620 | 0.2285 | 20.6900    |
| Stroke | log_s_Slackia_exigua                    | Weighted median           | 37 | 0.3579  | 0.3834 | 0.3506 | 0.0410  | 0.0476 | 0.3950 | 40.8620 | 0.2285 | 20.6900    |
| Stroke | log_s_Slackia_exigua                    | Inverse variance weighted | 37 | 0.1904  | 0.2589 | 0.4623 | 0.0410  | 0.0476 | 0.3950 | 40.8620 | 0.2285 | 20.6900    |
| Stroke | log_s_Slackia_exigua                    | Simple mode               | 37 | 0.2253  | 0.8391 | 0.7898 | 0.0410  | 0.0476 | 0.3950 | 40.8620 | 0.2285 | 20.6900    |
| Stroke | log_s_Slackia_exigua                    | Weighted mode             | 37 | 0.2891  | 0.7713 | 0.7100 | 0.0410  | 0.0476 | 0.3950 | 40.8620 | 0.2285 | 20.6900    |
| Stroke | log_s_Staphylococcus_aureus             | MR Egger                  | 37 | -0.1825 | 0.9021 | 0.8409 | 0.0204  | 0.0537 | 0.7065 | 52.0199 | 0.0320 | -75.1082   |
| Stroke | log_s_Staphylococcus_aureus             | Weighted median           | 37 | 0.4187  | 0.3637 | 0.2496 | 0.0204  | 0.0537 | 0.7065 | 52.0199 | 0.0320 | -75.1082   |
| Stroke | log_s_Staphylococcus_aureus             | Inverse variance weighted | 37 | 0.1415  | 0.2894 | 0.6250 | 0.0204  | 0.0537 | 0.7065 | 52.0199 | 0.0320 | -75.1082   |
| Stroke | log_s_Staphylococcus_aureus             | Simple mode               | 37 | 0.6886  | 0.8301 | 0.4123 | 0.0204  | 0.0537 | 0.7065 | 52.0199 | 0.0320 | -75.1082   |
| Stroke | log_s_Staphylococcus_aureus             | Weighted mode             | 37 | 0.5457  | 0.8100 | 0.5048 | 0.0204  | 0.0537 | 0.7065 | 52.0199 | 0.0320 | -75.1082   |
| Stroke | log_s_Streptococcus_constellatus        | MR Egger                  | 37 | 0.5327  | 0.7361 | 0.4740 | -0.0350 | 0.0439 | 0.4301 | 29.1475 | 0.7460 | 8.8354     |
| Stroke | log_s_Streptococcus_constellatus        | Weighted median           | 37 | 0.2815  | 0.3489 | 0.4198 | -0.0350 | 0.0439 | 0.4301 | 29.1475 | 0.7460 | 8.8354     |
| Stroke | log_s_Streptococcus_constellatus        | Inverse variance weighted | 37 | -0.0226 | 0.2403 | 0.9250 | -0.0350 | 0.0439 | 0.4301 | 29.1475 | 0.7460 | 8.8354     |
| Stroke | log_s_Streptococcus_constellatus        | Simple mode               | 37 | 0.5622  | 0.7308 | 0.4467 | -0.0350 | 0.0439 | 0.4301 | 29.1475 | 0.7460 | 8.8354     |
| Stroke | log_s_Streptococcus_constellatus        | Weighted mode             | 37 | 0.4692  | 0.6888 | 0.5001 | -0.0350 | 0.0439 | 0.4301 | 29.1475 | 0.7460 | 8.8354     |
| Stroke | log_s_Streptococcus_cristatus           | MR Egger                  | 37 | -0.9649 | 0.7789 | 0.2237 | 0.0512  | 0.0464 | 0.2768 | 40.0020 | 0.2970 | 128.9560   |
| Stroke | log_s_Streptococcus_cristatus           | Weighted median           | 37 | -0.1090 | 0.3359 | 0.7455 | 0.0512  | 0.0464 | 0.2768 | 40.0020 | 0.2970 | 128.9560   |
| Stroke | log_s_Streptococcus_cristatus           | Inverse variance weighted | 37 | -0.1508 | 0.2532 | 0.5514 | 0.0512  | 0.0464 | 0.2768 | 40.0020 | 0.2970 | 128.9560   |
| Stroke | log_s_Streptococcus_cristatus           | Simple mode               | 37 | 0.1557  | 0.7103 | 0.8277 | 0.0512  | 0.0464 | 0.2768 | 40.0020 | 0.2970 | 128.9560   |
| Stroke | log_s_Streptococcus_cristatus           | Weighted mode             | 37 | 0.0192  | 0.6407 | 0.9763 | 0.0512  | 0.0464 | 0.2768 | 40.0020 | 0.2970 | 128.9560   |
| Stroke | log_s_Streptococcus_peroris             | MR Egger                  | 37 | -0.8988 | 0.7370 | 0.2308 | 0.0490  | 0.0439 | 0.2722 | 35.5887 | 0.4880 | 27.2665    |
| Stroke | log_s_Streptococcus_peroris             | Weighted median           | 37 | -0.1584 | 0.3505 | 0.6512 | 0.0490  | 0.0439 | 0.2722 | 35.5887 | 0.4880 | 27.2665    |
| Stroke | log_s_Streptococcus_peroris             | Inverse variance weighted | 37 | -0.1216 | 0.2404 | 0.6129 | 0.0490  | 0.0439 | 0.2722 | 35.5887 | 0.4880 | 27.2665    |
| Stroke | log_s_Streptococcus_peroris             | Simple mode               | 37 | -0.7496 | 0.7459 | 0.3217 | 0.0490  | 0.0439 | 0.2722 | 35.5887 | 0.4880 | 27.2665    |
| Stroke | log_s_Streptococcus_peroris             | Weighted mode             | 37 | -0.0782 | 0.6816 | 0.9093 | 0.0490  | 0.0439 | 0.2722 | 35.5887 | 0.4880 | 27.2665    |
| Stroke | log_s_Streptococcus_pseudopneumoniae    | MR Egger                  | 37 | 0.4056  | 0.7390 | 0.5866 | -0.0075 | 0.0440 | 0.8659 | 31.2842 | 0.6482 | 27.1483    |
| Stroke | log_s_Streptococcus_pseudopneumoniae    | Weighted median           | 37 | 0.4549  | 0.3572 | 0.2028 | -0.0075 | 0.0440 | 0.8659 | 31.2842 | 0.6482 | 27.1483    |
| Stroke | log_s_Streptococcus_pseudopneumoniae    | Inverse variance weighted | 37 | 0.2867  | 0.2407 | 0.2337 | -0.0075 | 0.0440 | 0.8659 | 31.2842 | 0.6482 | 27.1483    |
| Stroke | log_s_Streptococcus_pseudopneumoniae    | Simple mode               | 37 | 0.5994  | 0.6965 | 0.3951 | -0.0075 | 0.0440 | 0.8659 | 31.2842 | 0.6482 | 27.1483    |
| Stroke | log_s_Streptococcus_pseudopneumoniae    | Weighted mode             | 37 | 0.5994  | 0.5843 | 0.3118 | -0.0075 | 0.0440 | 0.8659 | 31.2842 | 0.6482 | 27.1483    |
| Stroke | log_s_Succinatimonas_hippeï             | MR Egger                  | 37 | -0.5675 | 0.7912 | 0.4780 | 0.0584  | 0.0472 | 0.2238 | 42.0817 | 0.2244 | 10.0240    |
| Stroke | log_s_Succinatimonas_hippeï             | Weighted median           | 37 | 0.1649  | 0.3577 | 0.6449 | 0.0584  | 0.0472 | 0.2238 | 42.0817 | 0.2244 | 10.0240    |
| Stroke | log_s_Succinatimonas_hippeï             | Inverse variance weighted | 37 | 0.3589  | 0.2596 | 0.1668 | 0.0584  | 0.0472 | 0.2238 | 42.0817 | 0.2244 | 10.0240    |
| Stroke | log_s_Succinatimonas_hippeï             | Simple mode               | 37 | -0.1710 | 0.8318 | 0.8382 | 0.0584  | 0.0472 | 0.2238 | 42.0817 | 0.2244 | 10.0240    |
| Stroke | log_s_Succinatimonas_hippeï             | Weighted mode             | 37 | -0.3100 | 0.7125 | 0.6661 | 0.0584  | 0.0472 | 0.2238 | 42.0817 | 0.2244 | 10.0240    |
| Stroke | log_s_Turicibacter_sanguinis            | MR Egger                  | 37 | -0.2110 | 0.8607 | 0.8078 | 0.0254  | 0.0513 | 0.6235 | 47.7152 | 0.0743 | -3406.5865 |
| Stroke | log_s_Turicibacter_sanguinis            | Weighted median           | 37 | 0.1237  | 0.3550 | 0.7276 | 0.0254  | 0.0513 | 0.6235 | 47.7152 | 0.0743 | -3406.5865 |
| Stroke | log_s_Turicibacter_sanguinis            | Inverse variance weighted | 37 | 0.1921  | 0.2774 | 0.4887 | 0.0254  | 0.0513 | 0.6235 | 47.7152 | 0.0743 | -3406.5865 |
| Stroke | log_s_Turicibacter_sanguinis            | Simple mode               | 37 | -0.0297 | 0.6771 | 0.9652 | 0.0254  | 0.0513 | 0.6235 | 47.7152 | 0.0743 | -3406.5865 |
| Stroke | log_s_Turicibacter_sanguinis            | Weighted mode             | 37 | -0.1777 | 0.6085 | 0.7720 | 0.0254  | 0.0513 | 0.6235 | 47.7152 | 0.0743 | -3406.5865 |
| Stroke | log_s_Vibrio_cholerae                   | MR Egger                  | 37 | -0.5949 | 0.7473 | 0.4314 | 0.0317  | 0.0445 | 0.4810 | 35.9167 | 0.4253 | 3.8272     |
| Stroke | log_s_Vibrio_cholerae                   | Weighted median           | 37 | -0.1394 | 0.3440 | 0.6853 | 0.0317  | 0.0445 | 0.4810 | 35.9167 | 0.4253 | 3.8272     |
| Stroke | log_s_Vibrio_cholerae                   | Inverse variance weighted | 37 | -0.0915 | 0.2415 | 0.7048 | 0.0317  | 0.0445 | 0.4810 | 35.9167 | 0.4253 | 3.8272     |
| Stroke | log_s_Vibrio_cholerae                   | Simple mode               | 37 | -0.3090 | 0.7020 | 0.6624 | 0.0317  | 0.0445 | 0.4810 | 35.9167 | 0.4253 | 3.8272     |
| Stroke | log_s_Vibrio_cholerae                   | Weighted mode             | 37 | -0.2255 | 0.7126 | 0.7534 | 0.0317  | 0.0445 | 0.4810 | 35.9167 | 0.4253 | 3.8272     |
| Stroke | log_s_Vibrio_furnissii                  | MR Egger                  | 37 | -0.3003 | 0.9006 | 0.7408 | 0.0307  | 0.0537 | 0.5709 | 52.2748 | 0.0304 | -883.8309  |
| Stroke | log_s_Vibrio_furnissii                  | Weighted median           | 37 | 0.0595  | 0.3787 | 0.8751 | 0.0307  | 0.0537 | 0.5709 | 52.2748 | 0.0304 | -883.8309  |
| Stroke | log_s_Vibrio_furnissii                  | Inverse variance weighted | 37 | 0.1868  | 0.2906 | 0.5203 | 0.0307  | 0.0537 | 0.5709 | 52.2748 | 0.0304 | -883.8309  |
| Stroke | log_s_Vibrio_furnissii                  | Simple mode               | 37 | 1.3372  | 0.8892 | 0.1414 | 0.0307  | 0.0537 | 0.5709 | 52.2748 | 0.0304 | -883.8309  |
| Stroke | log_s_Vibrio_furnissii                  | Weighted mode             | 37 | -0.6726 | 0.8218 | 0.4185 | 0.0307  | 0.0537 | 0.5709 | 52.2748 | 0.0304 | -883.8309  |
| Stroke | log_s_unclassified_Streptococcus_oralis | MR Egger                  | 37 | -1.2638 | 0.7376 | 0.0955 | 0.0942  | 0.0440 | 0.0392 | 35.0101 | 0.5155 | 21.0192    |
| Stroke | log_s_unclassified_Streptococcus_oralis | Weighted median           | 37 | 0.2245  | 0.3598 | 0.5326 | 0.0942  | 0.0440 | 0.0392 | 35.0101 | 0.5155 | 21.0192    |

|        |                                         |                           |    |         |        |        |         |        |        |         |        |           |
|--------|-----------------------------------------|---------------------------|----|---------|--------|--------|---------|--------|--------|---------|--------|-----------|
| Stroke | log_s_unclassified_Streptococcus_oralis | Inverse variance weighted | 37 | 0.2300  | 0.2407 | 0.3394 | 0.0942  | 0.0440 | 0.0392 | 35.0101 | 0.5155 | 21.0192   |
| Stroke | log_s_unclassified_Streptococcus_oralis | Simple mode               | 37 | 0.3574  | 0.7104 | 0.6180 | 0.0942  | 0.0440 | 0.0392 | 35.0101 | 0.5155 | 21.0192   |
| Stroke | log_s_unclassified_Streptococcus_oralis | Weighted mode             | 37 | 0.1041  | 0.7175 | 0.8855 | 0.0942  | 0.0440 | 0.0392 | 35.0101 | 0.5155 | 21.0192   |
| Stroke | o_Actinomycetales                       | MR Egger                  | 37 | -0.0300 | 0.2847 | 0.9167 | -0.0028 | 0.0170 | 0.8690 | 28.2981 | 0.7816 | 6.4882    |
| Stroke | o_Actinomycetales                       | Weighted median           | 37 | -0.0594 | 0.1336 | 0.6569 | -0.0028 | 0.0170 | 0.8690 | 28.2981 | 0.7816 | 6.4882    |
| Stroke | o_Actinomycetales                       | Inverse variance weighted | 37 | -0.0747 | 0.0930 | 0.4220 | -0.0028 | 0.0170 | 0.8690 | 28.2981 | 0.7816 | 6.4882    |
| Stroke | o_Actinomycetales                       | Simple mode               | 37 | -0.1213 | 0.2733 | 0.6597 | -0.0028 | 0.0170 | 0.8690 | 28.2981 | 0.7816 | 6.4882    |
| Stroke | o_Actinomycetales                       | Weighted mode             | 37 | -0.0917 | 0.2944 | 0.7572 | -0.0028 | 0.0170 | 0.8690 | 28.2981 | 0.7816 | 6.4882    |
| Stroke | o_Bacillales                            | MR Egger                  | 37 | -0.3671 | 0.3124 | 0.2479 | 0.0251  | 0.0186 | 0.1874 | 45.4224 | 0.1350 | 3.4134    |
| Stroke | o_Bacillales                            | Weighted median           | 37 | -0.0701 | 0.1415 | 0.6205 | 0.0251  | 0.0186 | 0.1874 | 45.4224 | 0.1350 | 3.4134    |
| Stroke | o_Bacillales                            | Inverse variance weighted | 37 | 0.0299  | 0.1032 | 0.7721 | 0.0251  | 0.0186 | 0.1874 | 45.4224 | 0.1350 | 3.4134    |
| Stroke | o_Bacillales                            | Simple mode               | 37 | -0.1269 | 0.2661 | 0.6362 | 0.0251  | 0.0186 | 0.1874 | 45.4224 | 0.1350 | 3.4134    |
| Stroke | o_Bacillales                            | Weighted mode             | 37 | -0.0611 | 0.2129 | 0.7756 | 0.0251  | 0.0186 | 0.1874 | 45.4224 | 0.1350 | 3.4134    |
| Stroke | o_Campylobacteriales                    | MR Egger                  | 37 | 0.3695  | 0.4152 | 0.3795 | -0.0373 | 0.0248 | 0.1412 | 38.5353 | 0.3556 | 2.7870    |
| Stroke | o_Campylobacteriales                    | Weighted median           | 37 | -0.1724 | 0.2022 | 0.3938 | -0.0373 | 0.0248 | 0.1412 | 38.5353 | 0.3556 | 2.7870    |
| Stroke | o_Campylobacteriales                    | Inverse variance weighted | 37 | -0.2212 | 0.1380 | 0.1091 | -0.0373 | 0.0248 | 0.1412 | 38.5353 | 0.3556 | 2.7870    |
| Stroke | o_Campylobacteriales                    | Simple mode               | 37 | -0.0776 | 0.4077 | 0.8501 | -0.0373 | 0.0248 | 0.1412 | 38.5353 | 0.3556 | 2.7870    |
| Stroke | o_Campylobacteriales                    | Weighted mode             | 37 | -0.2040 | 0.3450 | 0.5580 | -0.0373 | 0.0248 | 0.1412 | 38.5353 | 0.3556 | 2.7870    |
| Stroke | o_Clostridiales                         | MR Egger                  | 37 | 0.0378  | 0.2278 | 0.8692 | 0.0060  | 0.0136 | 0.6627 | 27.2236 | 0.8232 | 14.4681   |
| Stroke | o_Clostridiales                         | Weighted median           | 37 | 0.1237  | 0.1067 | 0.2464 | 0.0060  | 0.0136 | 0.6627 | 27.2236 | 0.8232 | 14.4681   |
| Stroke | o_Clostridiales                         | Inverse variance weighted | 37 | 0.1325  | 0.0744 | 0.0750 | 0.0060  | 0.0136 | 0.6627 | 27.2236 | 0.8232 | 14.4681   |
| Stroke | o_Clostridiales                         | Simple mode               | 37 | 0.2300  | 0.2190 | 0.3005 | 0.0060  | 0.0136 | 0.6627 | 27.2236 | 0.8232 | 14.4681   |
| Stroke | o_Clostridiales                         | Weighted mode             | 37 | -0.0115 | 0.1963 | 0.9535 | 0.0060  | 0.0136 | 0.6627 | 27.2236 | 0.8232 | 14.4681   |
| Stroke | o_Erysipelotrichales                    | MR Egger                  | 37 | -0.0332 | 0.2876 | 0.9088 | 0.0034  | 0.0172 | 0.8446 | 39.1229 | 0.2899 | 5.5627    |
| Stroke | o_Erysipelotrichales                    | Weighted median           | 37 | 0.1095  | 0.1306 | 0.4018 | 0.0034  | 0.0172 | 0.8446 | 39.1229 | 0.2899 | 5.5627    |
| Stroke | o_Erysipelotrichales                    | Inverse variance weighted | 37 | 0.0205  | 0.0927 | 0.8253 | 0.0034  | 0.0172 | 0.8446 | 39.1229 | 0.2899 | 5.5627    |
| Stroke | o_Erysipelotrichales                    | Simple mode               | 37 | 0.1947  | 0.2595 | 0.4579 | 0.0034  | 0.0172 | 0.8446 | 39.1229 | 0.2899 | 5.5627    |
| Stroke | o_Erysipelotrichales                    | Weighted mode             | 37 | 0.1496  | 0.2452 | 0.5456 | 0.0034  | 0.0172 | 0.8446 | 39.1229 | 0.2899 | 5.5627    |
| Stroke | o_Pasteurellales                        | MR Egger                  | 37 | -0.6379 | 0.6671 | 0.3455 | 0.0270  | 0.0398 | 0.5023 | 32.1971 | 0.6041 | 96.9860   |
| Stroke | o_Pasteurellales                        | Weighted median           | 37 | -0.2799 | 0.3129 | 0.3712 | 0.0270  | 0.0398 | 0.5023 | 32.1971 | 0.6041 | 96.9860   |
| Stroke | o_Pasteurellales                        | Inverse variance weighted | 37 | -0.2106 | 0.2180 | 0.3341 | 0.0270  | 0.0398 | 0.5023 | 32.1971 | 0.6041 | 96.9860   |
| Stroke | o_Pasteurellales                        | Simple mode               | 37 | -0.6842 | 0.6250 | 0.2809 | 0.0270  | 0.0398 | 0.5023 | 32.1971 | 0.6041 | 96.9860   |
| Stroke | o_Pasteurellales                        | Weighted mode             | 37 | -0.5738 | 0.5298 | 0.2860 | 0.0270  | 0.0398 | 0.5023 | 32.1971 | 0.6041 | 96.9860   |
| Stroke | o_Pseudomonadales                       | MR Egger                  | 37 | -1.1211 | 0.8203 | 0.1804 | 0.0741  | 0.0489 | 0.1393 | 40.5544 | 0.2764 | 52.2331   |
| Stroke | o_Pseudomonadales                       | Weighted median           | 37 | 0.1248  | 0.3861 | 0.7466 | 0.0741  | 0.0489 | 0.1393 | 40.5544 | 0.2764 | 52.2331   |
| Stroke | o_Pseudomonadales                       | Inverse variance weighted | 37 | 0.0518  | 0.2730 | 0.8496 | 0.0741  | 0.0489 | 0.1393 | 40.5544 | 0.2764 | 52.2331   |
| Stroke | o_Pseudomonadales                       | Simple mode               | 37 | 1.0639  | 0.9236 | 0.2570 | 0.0741  | 0.0489 | 0.1393 | 40.5544 | 0.2764 | 52.2331   |
| Stroke | o_Pseudomonadales                       | Weighted mode             | 37 | 0.9934  | 0.8840 | 0.2686 | 0.0741  | 0.0489 | 0.1393 | 40.5544 | 0.2764 | 52.2331   |
| Stroke | o_Spirochaetales                        | MR Egger                  | 37 | 0.3650  | 0.3890 | 0.3545 | -0.0111 | 0.0232 | 0.6359 | 29.3947 | 0.7352 | 5.3277    |
| Stroke | o_Spirochaetales                        | Weighted median           | 37 | 0.0975  | 0.1862 | 0.6007 | -0.0111 | 0.0232 | 0.6359 | 29.3947 | 0.7352 | 5.3277    |
| Stroke | o_Spirochaetales                        | Inverse variance weighted | 37 | 0.1895  | 0.1271 | 0.1360 | -0.0111 | 0.0232 | 0.6359 | 29.3947 | 0.7352 | 5.3277    |
| Stroke | o_Spirochaetales                        | Simple mode               | 37 | 0.0654  | 0.3415 | 0.8491 | -0.0111 | 0.0232 | 0.6359 | 29.3947 | 0.7352 | 5.3277    |
| Stroke | o_Spirochaetales                        | Weighted mode             | 37 | 0.0448  | 0.3194 | 0.8893 | -0.0111 | 0.0232 | 0.6359 | 29.3947 | 0.7352 | 5.3277    |
| Stroke | p_Lentisphaerae                         | MR Egger                  | 37 | 0.3746  | 0.9724 | 0.7024 | 0.0101  | 0.0580 | 0.8626 | 22.3760 | 0.9515 | 7.1315    |
| Stroke | p_Lentisphaerae                         | Weighted median           | 37 | 0.1628  | 0.4606 | 0.7238 | 0.0101  | 0.0580 | 0.8626 | 22.3760 | 0.9515 | 7.1315    |
| Stroke | p_Lentisphaerae                         | Inverse variance weighted | 37 | 0.5349  | 0.3177 | 0.0922 | 0.0101  | 0.0580 | 0.8626 | 22.3760 | 0.9515 | 7.1315    |
| Stroke | p_Lentisphaerae                         | Simple mode               | 37 | 0.2246  | 0.9671 | 0.8177 | 0.0101  | 0.0580 | 0.8626 | 22.3760 | 0.9515 | 7.1315    |
| Stroke | p_Lentisphaerae                         | Weighted mode             | 37 | -0.0079 | 0.7856 | 0.9920 | 0.0101  | 0.0580 | 0.8626 | 22.3760 | 0.9515 | 7.1315    |
| Stroke | p_Proteobacteria                        | MR Egger                  | 37 | -0.3108 | 0.4290 | 0.4737 | 0.0189  | 0.0256 | 0.4659 | 51.3245 | 0.0369 | 2.4252    |
| Stroke | p_Proteobacteria                        | Weighted median           | 37 | -0.0169 | 0.1765 | 0.9238 | 0.0189  | 0.0256 | 0.4659 | 51.3245 | 0.0369 | 2.4252    |
| Stroke | p_Proteobacteria                        | Inverse variance weighted | 37 | -0.0118 | 0.1393 | 0.9324 | 0.0189  | 0.0256 | 0.4659 | 51.3245 | 0.0369 | 2.4252    |
| Stroke | p_Proteobacteria                        | Simple mode               | 37 | 0.4477  | 0.3828 | 0.2499 | 0.0189  | 0.0256 | 0.4659 | 51.3245 | 0.0369 | 2.4252    |
| Stroke | p_Proteobacteria                        | Weighted mode             | 37 | 0.3274  | 0.3219 | 0.3158 | 0.0189  | 0.0256 | 0.4659 | 51.3245 | 0.0369 | 2.4252    |
| Stroke | p_Synergistetes                         | MR Egger                  | 37 | 0.6492  | 0.8948 | 0.4730 | -0.0336 | 0.0534 | 0.5335 | 24.1154 | 0.9170 | 2.3345    |
| Stroke | p_Synergistetes                         | Weighted median           | 37 | 0.1884  | 0.4072 | 0.6437 | -0.0336 | 0.0534 | 0.5335 | 24.1154 | 0.9170 | 2.3345    |
| Stroke | p_Synergistetes                         | Inverse variance weighted | 37 | 0.1173  | 0.2924 | 0.6883 | -0.0336 | 0.0534 | 0.5335 | 24.1154 | 0.9170 | 2.3345    |
| Stroke | p_Synergistetes                         | Simple mode               | 37 | 0.0889  | 0.7704 | 0.9088 | -0.0336 | 0.0534 | 0.5335 | 24.1154 | 0.9170 | 2.3345    |
| Stroke | p_Synergistetes                         | Weighted mode             | 37 | 0.1099  | 0.6622 | 0.8691 | -0.0336 | 0.0534 | 0.5335 | 24.1154 | 0.9170 | 2.3345    |
| Stroke | p_Verrucomicrobia                       | MR Egger                  | 37 | -1.7386 | 1.2061 | 0.1583 | 0.1176  | 0.0720 | 0.1110 | 40.7086 | 0.2708 | -111.2104 |
| Stroke | p_Verrucomicrobia                       | Weighted median           | 37 | -0.3585 | 0.5548 | 0.5182 | 0.1176  | 0.0720 | 0.1110 | 40.7086 | 0.2708 | -111.2104 |
| Stroke | p_Verrucomicrobia                       | Inverse variance weighted | 37 | 0.1252  | 0.4032 | 0.7562 | 0.1176  | 0.0720 | 0.1110 | 40.7086 | 0.2708 | -111.2104 |

|        |                              |                           |    |         |        |        |         |        |        |         |        |           |
|--------|------------------------------|---------------------------|----|---------|--------|--------|---------|--------|--------|---------|--------|-----------|
| Stroke | p_Verrucomicrobia            | Simple mode               | 37 | -1.0493 | 1.1377 | 0.3625 | 0.1176  | 0.0720 | 0.1110 | 40.7086 | 0.2708 | -111.2104 |
| Stroke | p_Verrucomicrobia            | Weighted mode             | 37 | -0.9449 | 1.1149 | 0.4023 | 0.1176  | 0.0720 | 0.1110 | 40.7086 | 0.2708 | -111.2104 |
| Stroke | s_Acidaminococcus_fermentans | MR Egger                  | 37 | 0.3749  | 0.5490 | 0.4991 | -0.0148 | 0.0328 | 0.6545 | 33.2317 | 0.5537 | 1.4163    |
| Stroke | s_Acidaminococcus_fermentans | Weighted median           | 37 | 0.1400  | 0.2684 | 0.6020 | -0.0148 | 0.0328 | 0.6545 | 33.2317 | 0.5537 | 1.4163    |
| Stroke | s_Acidaminococcus_fermentans | Inverse variance weighted | 37 | 0.1407  | 0.1794 | 0.4328 | -0.0148 | 0.0328 | 0.6545 | 33.2317 | 0.5537 | 1.4163    |
| Stroke | s_Acidaminococcus_fermentans | Simple mode               | 37 | 0.8359  | 0.5952 | 0.1688 | -0.0148 | 0.0328 | 0.6545 | 33.2317 | 0.5537 | 1.4163    |
| Stroke | s_Acidaminococcus_fermentans | Weighted mode             | 37 | 0.7119  | 0.4850 | 0.1508 | -0.0148 | 0.0328 | 0.6545 | 33.2317 | 0.5537 | 1.4163    |
| Stroke | s_Actinomyces_odontolyticus  | MR Egger                  | 37 | -0.4021 | 0.5043 | 0.4307 | 0.0341  | 0.0301 | 0.2644 | 39.6134 | 0.3119 | 1.9384    |
| Stroke | s_Actinomyces_odontolyticus  | Weighted median           | 37 | 0.0283  | 0.2360 | 0.9045 | 0.0341  | 0.0301 | 0.2644 | 39.6134 | 0.3119 | 1.9384    |
| Stroke | s_Actinomyces_odontolyticus  | Inverse variance weighted | 37 | 0.1386  | 0.1655 | 0.4024 | 0.0341  | 0.0301 | 0.2644 | 39.6134 | 0.3119 | 1.9384    |
| Stroke | s_Actinomyces_odontolyticus  | Simple mode               | 37 | -0.1087 | 0.4925 | 0.8265 | 0.0341  | 0.0301 | 0.2644 | 39.6134 | 0.3119 | 1.9384    |
| Stroke | s_Actinomyces_odontolyticus  | Weighted mode             | 37 | -0.0959 | 0.4898 | 0.8459 | 0.0341  | 0.0301 | 0.2644 | 39.6134 | 0.3119 | 1.9384    |
| Stroke | s_Actinomyces_viscosus       | MR Egger                  | 37 | -0.4112 | 0.5131 | 0.4283 | 0.0150  | 0.0306 | 0.6276 | 50.0892 | 0.0473 | 3.1792    |
| Stroke | s_Actinomyces_viscosus       | Weighted median           | 37 | -0.2040 | 0.1998 | 0.3072 | 0.0150  | 0.0306 | 0.6276 | 50.0892 | 0.0473 | 3.1792    |
| Stroke | s_Actinomyces_viscosus       | Inverse variance weighted | 37 | -0.1739 | 0.1660 | 0.2950 | 0.0150  | 0.0306 | 0.6276 | 50.0892 | 0.0473 | 3.1792    |
| Stroke | s_Actinomyces_viscosus       | Simple mode               | 37 | 0.1603  | 0.4593 | 0.7291 | 0.0150  | 0.0306 | 0.6276 | 50.0892 | 0.0473 | 3.1792    |
| Stroke | s_Actinomyces_viscosus       | Weighted mode             | 37 | 0.0609  | 0.4344 | 0.8894 | 0.0150  | 0.0306 | 0.6276 | 50.0892 | 0.0473 | 3.1792    |
| Stroke | s_Akkermansia_muciniphila    | MR Egger                  | 37 | -1.5670 | 1.3690 | 0.2601 | 0.1038  | 0.0817 | 0.2120 | 46.1177 | 0.1204 | -118.2854 |
| Stroke | s_Akkermansia_muciniphila    | Weighted median           | 37 | 0.4574  | 0.6296 | 0.4676 | 0.1038  | 0.0817 | 0.2120 | 46.1177 | 0.1204 | -118.2854 |
| Stroke | s_Akkermansia_muciniphila    | Inverse variance weighted | 37 | 0.0778  | 0.4511 | 0.8631 | 0.1038  | 0.0817 | 0.2120 | 46.1177 | 0.1204 | -118.2854 |
| Stroke | s_Akkermansia_muciniphila    | Simple mode               | 37 | 0.5929  | 1.3071 | 0.6528 | 0.1038  | 0.0817 | 0.2120 | 46.1177 | 0.1204 | -118.2854 |
| Stroke | s_Akkermansia_muciniphila    | Weighted mode             | 37 | 0.5100  | 1.0203 | 0.6202 | 0.1038  | 0.0817 | 0.2120 | 46.1177 | 0.1204 | -118.2854 |
| Stroke | s_Alistipes_shahii           | MR Egger                  | 37 | 0.5005  | 0.5966 | 0.4072 | -0.0187 | 0.0356 | 0.6021 | 31.0819 | 0.6578 | 1.2402    |
| Stroke | s_Alistipes_shahii           | Weighted median           | 37 | 0.2610  | 0.2697 | 0.3332 | -0.0187 | 0.0356 | 0.6021 | 31.0819 | 0.6578 | 1.2402    |
| Stroke | s_Alistipes_shahii           | Inverse variance weighted | 37 | 0.2038  | 0.1950 | 0.2958 | -0.0187 | 0.0356 | 0.6021 | 31.0819 | 0.6578 | 1.2402    |
| Stroke | s_Alistipes_shahii           | Simple mode               | 37 | 0.7441  | 0.5867 | 0.2128 | -0.0187 | 0.0356 | 0.6021 | 31.0819 | 0.6578 | 1.2402    |
| Stroke | s_Alistipes_shahii           | Weighted mode             | 37 | 0.6001  | 0.4989 | 0.2369 | -0.0187 | 0.0356 | 0.6021 | 31.0819 | 0.6578 | 1.2402    |
| Stroke | s_Bacteroides_caccae         | MR Egger                  | 37 | -0.7204 | 0.8350 | 0.3941 | 0.0390  | 0.0498 | 0.4384 | 62.1669 | 0.0031 | 29.3217   |
| Stroke | s_Bacteroides_caccae         | Weighted median           | 37 | -0.4637 | 0.3202 | 0.1475 | 0.0390  | 0.0498 | 0.4384 | 62.1669 | 0.0031 | 29.3217   |
| Stroke | s_Bacteroides_caccae         | Inverse variance weighted | 37 | -0.1019 | 0.2715 | 0.7073 | 0.0390  | 0.0498 | 0.4384 | 62.1669 | 0.0031 | 29.3217   |
| Stroke | s_Bacteroides_caccae         | Simple mode               | 37 | -0.6405 | 0.6954 | 0.3631 | 0.0390  | 0.0498 | 0.4384 | 62.1669 | 0.0031 | 29.3217   |
| Stroke | s_Bacteroides_caccae         | Weighted mode             | 37 | -0.6635 | 0.6924 | 0.3444 | 0.0390  | 0.0498 | 0.4384 | 62.1669 | 0.0031 | 29.3217   |
| Stroke | s_Bacteroides_clarus         | MR Egger                  | 37 | -0.1317 | 0.5725 | 0.8193 | 0.0243  | 0.0342 | 0.4822 | 34.1970 | 0.5067 | 1.7752    |
| Stroke | s_Bacteroides_clarus         | Weighted median           | 37 | 0.2379  | 0.2828 | 0.4001 | 0.0243  | 0.0342 | 0.4822 | 34.1970 | 0.5067 | 1.7752    |
| Stroke | s_Bacteroides_clarus         | Inverse variance weighted | 37 | 0.2526  | 0.1871 | 0.1770 | 0.0243  | 0.0342 | 0.4822 | 34.1970 | 0.5067 | 1.7752    |
| Stroke | s_Bacteroides_clarus         | Simple mode               | 37 | 0.3261  | 0.6248 | 0.6049 | 0.0243  | 0.0342 | 0.4822 | 34.1970 | 0.5067 | 1.7752    |
| Stroke | s_Bacteroides_clarus         | Weighted mode             | 37 | 0.0160  | 0.5699 | 0.9777 | 0.0243  | 0.0342 | 0.4822 | 34.1970 | 0.5067 | 1.7752    |
| Stroke | s_Bacteroides_coprocola      | MR Egger                  | 37 | -0.1728 | 0.6913 | 0.8041 | 0.0323  | 0.0412 | 0.4395 | 37.5117 | 0.3547 | 13.4271   |
| Stroke | s_Bacteroides_coprocola      | Weighted median           | 37 | 0.2520  | 0.3178 | 0.4279 | 0.0323  | 0.0412 | 0.4395 | 37.5117 | 0.3547 | 13.4271   |
| Stroke | s_Bacteroides_coprocola      | Inverse variance weighted | 37 | 0.3381  | 0.2247 | 0.1323 | 0.0323  | 0.0412 | 0.4395 | 37.5117 | 0.3547 | 13.4271   |
| Stroke | s_Bacteroides_coprocola      | Simple mode               | 37 | 0.2186  | 0.6829 | 0.7507 | 0.0323  | 0.0412 | 0.4395 | 37.5117 | 0.3547 | 13.4271   |
| Stroke | s_Bacteroides_coprocola      | Weighted mode             | 37 | 0.1599  | 0.5735 | 0.7819 | 0.0323  | 0.0412 | 0.4395 | 37.5117 | 0.3547 | 13.4271   |
| Stroke | s_Bacteroides_coprophilus    | MR Egger                  | 37 | 0.5749  | 0.4911 | 0.2497 | -0.0278 | 0.0293 | 0.3488 | 28.5730 | 0.8062 | 6.1206    |
| Stroke | s_Bacteroides_coprophilus    | Weighted median           | 37 | -0.0219 | 0.2324 | 0.9248 | -0.0278 | 0.0293 | 0.3488 | 28.5730 | 0.8062 | 6.1206    |
| Stroke | s_Bacteroides_coprophilus    | Inverse variance weighted | 37 | 0.1341  | 0.1605 | 0.4035 | -0.0278 | 0.0293 | 0.3488 | 28.5730 | 0.8062 | 6.1206    |
| Stroke | s_Bacteroides_coprophilus    | Simple mode               | 37 | -0.1022 | 0.4495 | 0.8215 | -0.0278 | 0.0293 | 0.3488 | 28.5730 | 0.8062 | 6.1206    |
| Stroke | s_Bacteroides_coprophilus    | Weighted mode             | 37 | -0.1318 | 0.4276 | 0.7596 | -0.0278 | 0.0293 | 0.3488 | 28.5730 | 0.8062 | 6.1206    |
| Stroke | s_Bacteroides_dorei          | MR Egger                  | 37 | -0.2082 | 0.4318 | 0.6328 | 0.0190  | 0.0258 | 0.4661 | 36.2352 | 0.4108 | 1.2071    |
| Stroke | s_Bacteroides_dorei          | Weighted median           | 37 | 0.0805  | 0.2053 | 0.6948 | 0.0190  | 0.0258 | 0.4661 | 36.2352 | 0.4108 | 1.2071    |
| Stroke | s_Bacteroides_dorei          | Inverse variance weighted | 37 | 0.0926  | 0.1402 | 0.5090 | 0.0190  | 0.0258 | 0.4661 | 36.2352 | 0.4108 | 1.2071    |
| Stroke | s_Bacteroides_dorei          | Simple mode               | 37 | -0.1037 | 0.3909 | 0.7923 | 0.0190  | 0.0258 | 0.4661 | 36.2352 | 0.4108 | 1.2071    |
| Stroke | s_Bacteroides_dorei          | Weighted mode             | 37 | -0.0624 | 0.3479 | 0.8586 | 0.0190  | 0.0258 | 0.4661 | 36.2352 | 0.4108 | 1.2071    |
| Stroke | s_Bacteroides_eggerthii      | MR Egger                  | 37 | -0.0499 | 0.5194 | 0.9240 | -0.0096 | 0.0310 | 0.7592 | 37.1835 | 0.3688 | 1.0215    |
| Stroke | s_Bacteroides_eggerthii      | Weighted median           | 37 | -0.4224 | 0.2361 | 0.0735 | -0.0096 | 0.0310 | 0.7592 | 37.1835 | 0.3688 | 1.0215    |
| Stroke | s_Bacteroides_eggerthii      | Inverse variance weighted | 37 | -0.2015 | 0.1676 | 0.2291 | -0.0096 | 0.0310 | 0.7592 | 37.1835 | 0.3688 | 1.0215    |
| Stroke | s_Bacteroides_eggerthii      | Simple mode               | 37 | -0.9318 | 0.5185 | 0.0807 | -0.0096 | 0.0310 | 0.7592 | 37.1835 | 0.3688 | 1.0215    |
| Stroke | s_Bacteroides_eggerthii      | Weighted mode             | 37 | -0.6641 | 0.4751 | 0.1707 | -0.0096 | 0.0310 | 0.7592 | 37.1835 | 0.3688 | 1.0215    |
| Stroke | s_Bacteroides_finegoldii     | MR Egger                  | 37 | -0.3396 | 0.4684 | 0.4733 | 0.0233  | 0.0279 | 0.4100 | 38.2788 | 0.3229 | 3.4677    |
| Stroke | s_Bacteroides_finegoldii     | Weighted median           | 37 | 0.1593  | 0.2245 | 0.4779 | 0.0233  | 0.0279 | 0.4100 | 38.2788 | 0.3229 | 3.4677    |
| Stroke | s_Bacteroides_finegoldii     | Inverse variance weighted | 37 | 0.0296  | 0.1525 | 0.8463 | 0.0233  | 0.0279 | 0.4100 | 38.2788 | 0.3229 | 3.4677    |
| Stroke | s_Bacteroides_finegoldii     | Simple mode               | 37 | 0.1911  | 0.4946 | 0.7016 | 0.0233  | 0.0279 | 0.4100 | 38.2788 | 0.3229 | 3.4677    |

|        |                                |                           |    |         |        |        |         |        |        |         |        |         |
|--------|--------------------------------|---------------------------|----|---------|--------|--------|---------|--------|--------|---------|--------|---------|
| Stroke | s_Bacteroides_finegoldii       | Weighted mode             | 37 | 0.1911  | 0.4825 | 0.6945 | 0.0233  | 0.0279 | 0.4100 | 38.2788 | 0.3229 | 3.4677  |
| Stroke | s_Bacteroides_fluxus           | MR Egger                  | 37 | 0.4833  | 0.4460 | 0.2859 | -0.0307 | 0.0266 | 0.2559 | 28.2970 | 0.8164 | 4.3908  |
| Stroke | s_Bacteroides_fluxus           | Weighted median           | 37 | -0.0613 | 0.2010 | 0.7605 | -0.0307 | 0.0266 | 0.2559 | 28.2970 | 0.8164 | 4.3908  |
| Stroke | s_Bacteroides_fluxus           | Inverse variance weighted | 37 | -0.0036 | 0.1457 | 0.9804 | -0.0307 | 0.0266 | 0.2559 | 28.2970 | 0.8164 | 4.3908  |
| Stroke | s_Bacteroides_fluxus           | Simple mode               | 37 | -0.3147 | 0.4237 | 0.4624 | -0.0307 | 0.0266 | 0.2559 | 28.2970 | 0.8164 | 4.3908  |
| Stroke | s_Bacteroides_fluxus           | Weighted mode             | 37 | -0.1028 | 0.3509 | 0.7713 | -0.0307 | 0.0266 | 0.2559 | 28.2970 | 0.8164 | 4.3908  |
| Stroke | s_Bacteroides_fragilis         | MR Egger                  | 37 | -0.2964 | 0.5208 | 0.5729 | 0.0144  | 0.0311 | 0.6464 | 29.3779 | 0.7359 | 1.1729  |
| Stroke | s_Bacteroides_fragilis         | Weighted median           | 37 | -0.1679 | 0.2337 | 0.4725 | 0.0144  | 0.0311 | 0.6464 | 29.3779 | 0.7359 | 1.1729  |
| Stroke | s_Bacteroides_fragilis         | Inverse variance weighted | 37 | -0.0687 | 0.1702 | 0.6866 | 0.0144  | 0.0311 | 0.6464 | 29.3779 | 0.7359 | 1.1729  |
| Stroke | s_Bacteroides_fragilis         | Simple mode               | 37 | 0.2393  | 0.4649 | 0.6099 | 0.0144  | 0.0311 | 0.6464 | 29.3779 | 0.7359 | 1.1729  |
| Stroke | s_Bacteroides_fragilis         | Weighted mode             | 37 | -0.0730 | 0.4245 | 0.8644 | 0.0144  | 0.0311 | 0.6464 | 29.3779 | 0.7359 | 1.1729  |
| Stroke | s_Bacteroides_helcogenes       | MR Egger                  | 37 | -0.2079 | 0.5208 | 0.6921 | -0.0063 | 0.0311 | 0.8415 | 35.3667 | 0.4509 | 1.2102  |
| Stroke | s_Bacteroides_helcogenes       | Weighted median           | 37 | -0.3001 | 0.2547 | 0.2386 | -0.0063 | 0.0311 | 0.8415 | 35.3667 | 0.4509 | 1.2102  |
| Stroke | s_Bacteroides_helcogenes       | Inverse variance weighted | 37 | -0.3071 | 0.1693 | 0.0697 | -0.0063 | 0.0311 | 0.8415 | 35.3667 | 0.4509 | 1.2102  |
| Stroke | s_Bacteroides_helcogenes       | Simple mode               | 37 | -0.7548 | 0.5603 | 0.1863 | -0.0063 | 0.0311 | 0.8415 | 35.3667 | 0.4509 | 1.2102  |
| Stroke | s_Bacteroides_helcogenes       | Weighted mode             | 37 | -0.4793 | 0.4524 | 0.2964 | -0.0063 | 0.0311 | 0.8415 | 35.3667 | 0.4509 | 1.2102  |
| Stroke | s_Bacteroides_intestinalis     | MR Egger                  | 37 | 0.3687  | 0.5417 | 0.5006 | -0.0279 | 0.0323 | 0.3930 | 34.6260 | 0.4860 | 9.0471  |
| Stroke | s_Bacteroides_intestinalis     | Weighted median           | 37 | -0.1823 | 0.2477 | 0.4617 | -0.0279 | 0.0323 | 0.3930 | 34.6260 | 0.4860 | 9.0471  |
| Stroke | s_Bacteroides_intestinalis     | Inverse variance weighted | 37 | -0.0741 | 0.1770 | 0.6756 | -0.0279 | 0.0323 | 0.3930 | 34.6260 | 0.4860 | 9.0471  |
| Stroke | s_Bacteroides_intestinalis     | Simple mode               | 37 | -0.4068 | 0.4538 | 0.3759 | -0.0279 | 0.0323 | 0.3930 | 34.6260 | 0.4860 | 9.0471  |
| Stroke | s_Bacteroides_intestinalis     | Weighted mode             | 37 | -0.1939 | 0.3949 | 0.6265 | -0.0279 | 0.0323 | 0.3930 | 34.6260 | 0.4860 | 9.0471  |
| Stroke | s_Bacteroides_ovatus           | MR Egger                  | 37 | -0.3307 | 0.3302 | 0.3234 | 0.0111  | 0.0197 | 0.5776 | 34.9756 | 0.4694 | 8.6816  |
| Stroke | s_Bacteroides_ovatus           | Weighted median           | 37 | -0.1654 | 0.1587 | 0.2974 | 0.0111  | 0.0197 | 0.5776 | 34.9756 | 0.4694 | 8.6816  |
| Stroke | s_Bacteroides_ovatus           | Inverse variance weighted | 37 | -0.1553 | 0.1079 | 0.1500 | 0.0111  | 0.0197 | 0.5776 | 34.9756 | 0.4694 | 8.6816  |
| Stroke | s_Bacteroides_ovatus           | Simple mode               | 37 | -0.3483 | 0.2768 | 0.2163 | 0.0111  | 0.0197 | 0.5776 | 34.9756 | 0.4694 | 8.6816  |
| Stroke | s_Bacteroides_ovatus           | Weighted mode             | 37 | -0.3483 | 0.2714 | 0.2075 | 0.0111  | 0.0197 | 0.5776 | 34.9756 | 0.4694 | 8.6816  |
| Stroke | s_Bacteroides_pectinophilus    | MR Egger                  | 37 | 0.2267  | 0.3312 | 0.4981 | -0.0024 | 0.0198 | 0.9049 | 24.2660 | 0.9134 | NA      |
| Stroke | s_Bacteroides_pectinophilus    | Weighted median           | 37 | 0.2527  | 0.1535 | 0.0998 | -0.0024 | 0.0198 | 0.9049 | 24.2660 | 0.9134 | NA      |
| Stroke | s_Bacteroides_pectinophilus    | Inverse variance weighted | 37 | 0.1890  | 0.1082 | 0.0806 | -0.0024 | 0.0198 | 0.9049 | 24.2660 | 0.9134 | NA      |
| Stroke | s_Bacteroides_pectinophilus    | Simple mode               | 37 | 0.3203  | 0.3150 | 0.3160 | -0.0024 | 0.0198 | 0.9049 | 24.2660 | 0.9134 | NA      |
| Stroke | s_Bacteroides_pectinophilus    | Weighted mode             | 37 | 0.1532  | 0.2780 | 0.5850 | -0.0024 | 0.0198 | 0.9049 | 24.2660 | 0.9134 | NA      |
| Stroke | s_Bacteroides_plebeius         | MR Egger                  | 37 | -0.2934 | 0.8451 | 0.7305 | 0.0386  | 0.0504 | 0.4495 | 32.7285 | 0.5782 | 22.0016 |
| Stroke | s_Bacteroides_plebeius         | Weighted median           | 37 | 0.3676  | 0.3926 | 0.3491 | 0.0386  | 0.0504 | 0.4495 | 32.7285 | 0.5782 | 22.0016 |
| Stroke | s_Bacteroides_plebeius         | Inverse variance weighted | 37 | 0.3175  | 0.2762 | 0.2504 | 0.0386  | 0.0504 | 0.4495 | 32.7285 | 0.5782 | 22.0016 |
| Stroke | s_Bacteroides_plebeius         | Simple mode               | 37 | 1.1815  | 0.8875 | 0.1915 | 0.0386  | 0.0504 | 0.4495 | 32.7285 | 0.5782 | 22.0016 |
| Stroke | s_Bacteroides_plebeius         | Weighted mode             | 37 | 1.0912  | 0.9196 | 0.2432 | 0.0386  | 0.0504 | 0.4495 | 32.7285 | 0.5782 | 22.0016 |
| Stroke | s_Bacteroides_salanitronis     | MR Egger                  | 37 | -0.1558 | 0.3556 | 0.6639 | 0.0115  | 0.0212 | 0.5910 | 31.0008 | 0.6616 | 6.4939  |
| Stroke | s_Bacteroides_salanitronis     | Weighted median           | 37 | -0.1039 | 0.1640 | 0.5266 | 0.0115  | 0.0212 | 0.5910 | 31.0008 | 0.6616 | 6.4939  |
| Stroke | s_Bacteroides_salanitronis     | Inverse variance weighted | 37 | 0.0265  | 0.1162 | 0.8199 | 0.0115  | 0.0212 | 0.5910 | 31.0008 | 0.6616 | 6.4939  |
| Stroke | s_Bacteroides_salanitronis     | Simple mode               | 37 | -0.1419 | 0.3437 | 0.6821 | 0.0115  | 0.0212 | 0.5910 | 31.0008 | 0.6616 | 6.4939  |
| Stroke | s_Bacteroides_salanitronis     | Weighted mode             | 37 | -0.2417 | 0.3267 | 0.4643 | 0.0115  | 0.0212 | 0.5910 | 31.0008 | 0.6616 | 6.4939  |
| Stroke | s_Bacteroides_stercoris        | MR Egger                  | 37 | -0.2725 | 0.7027 | 0.7006 | 0.0319  | 0.0419 | 0.4525 | 28.2627 | 0.7830 | 1.1519  |
| Stroke | s_Bacteroides_stercoris        | Weighted median           | 37 | 0.1379  | 0.3218 | 0.6683 | 0.0319  | 0.0419 | 0.4525 | 28.2627 | 0.7830 | 1.1519  |
| Stroke | s_Bacteroides_stercoris        | Inverse variance weighted | 37 | 0.2322  | 0.2296 | 0.3120 | 0.0319  | 0.0419 | 0.4525 | 28.2627 | 0.7830 | 1.1519  |
| Stroke | s_Bacteroides_stercoris        | Simple mode               | 37 | 0.1855  | 0.6312 | 0.7706 | 0.0319  | 0.0419 | 0.4525 | 28.2627 | 0.7830 | 1.1519  |
| Stroke | s_Bacteroides_stercoris        | Weighted mode             | 37 | 0.3760  | 0.5707 | 0.5142 | 0.0319  | 0.0419 | 0.4525 | 28.2627 | 0.7830 | 1.1519  |
| Stroke | s_Bacteroides_thetaiotaomicron | MR Egger                  | 37 | 0.0972  | 0.3665 | 0.7924 | -0.0119 | 0.0219 | 0.5896 | 30.4869 | 0.6858 | 8.2646  |
| Stroke | s_Bacteroides_thetaiotaomicron | Weighted median           | 37 | -0.0204 | 0.1685 | 0.9035 | -0.0119 | 0.0219 | 0.5896 | 30.4869 | 0.6858 | 8.2646  |
| Stroke | s_Bacteroides_thetaiotaomicron | Inverse variance weighted | 37 | -0.0914 | 0.1197 | 0.4453 | -0.0119 | 0.0219 | 0.5896 | 30.4869 | 0.6858 | 8.2646  |
| Stroke | s_Bacteroides_thetaiotaomicron | Simple mode               | 37 | 0.0061  | 0.3573 | 0.9864 | -0.0119 | 0.0219 | 0.5896 | 30.4869 | 0.6858 | 8.2646  |
| Stroke | s_Bacteroides_thetaiotaomicron | Weighted mode             | 37 | 0.0154  | 0.3045 | 0.9601 | -0.0119 | 0.0219 | 0.5896 | 30.4869 | 0.6858 | 8.2646  |
| Stroke | s_Bacteroides_uniformis        | MR Egger                  | 37 | -0.0326 | 0.4616 | 0.9440 | -0.0038 | 0.0275 | 0.8912 | 36.8618 | 0.3828 | 2.3414  |
| Stroke | s_Bacteroides_uniformis        | Weighted median           | 37 | 0.0480  | 0.2159 | 0.8239 | -0.0038 | 0.0275 | 0.8912 | 36.8618 | 0.3828 | 2.3414  |
| Stroke | s_Bacteroides_uniformis        | Inverse variance weighted | 37 | -0.0927 | 0.1488 | 0.5330 | -0.0038 | 0.0275 | 0.8912 | 36.8618 | 0.3828 | 2.3414  |
| Stroke | s_Bacteroides_uniformis        | Simple mode               | 37 | 0.0632  | 0.4409 | 0.8868 | -0.0038 | 0.0275 | 0.8912 | 36.8618 | 0.3828 | 2.3414  |
| Stroke | s_Bacteroides_uniformis        | Weighted mode             | 37 | 0.1131  | 0.3787 | 0.7670 | -0.0038 | 0.0275 | 0.8912 | 36.8618 | 0.3828 | 2.3414  |
| Stroke | s_Bacteroides_xylanisolvens    | MR Egger                  | 37 | -0.2893 | 0.3771 | 0.4481 | 0.0170  | 0.0225 | 0.4561 | 28.4882 | 0.7738 | 3.5347  |
| Stroke | s_Bacteroides_xylanisolvens    | Weighted median           | 37 | -0.0948 | 0.1780 | 0.5944 | 0.0170  | 0.0225 | 0.4561 | 28.4882 | 0.7738 | 3.5347  |
| Stroke | s_Bacteroides_xylanisolvens    | Inverse variance weighted | 37 | -0.0207 | 0.1232 | 0.8663 | 0.0170  | 0.0225 | 0.4561 | 28.4882 | 0.7738 | 3.5347  |
| Stroke | s_Bacteroides_xylanisolvens    | Simple mode               | 37 | -0.1147 | 0.3590 | 0.7512 | 0.0170  | 0.0225 | 0.4561 | 28.4882 | 0.7738 | 3.5347  |
| Stroke | s_Bacteroides_xylanisolvens    | Weighted mode             | 37 | -0.1729 | 0.2915 | 0.5568 | 0.0170  | 0.0225 | 0.4561 | 28.4882 | 0.7738 | 3.5347  |

|        |                                                                         |                           |    |         |        |        |         |        |        |         |        |             |
|--------|-------------------------------------------------------------------------|---------------------------|----|---------|--------|--------|---------|--------|--------|---------|--------|-------------|
| Stroke | s_Bifidobacterium_adolescentis                                          | MR Egger                  | 37 | -0.7125 | 0.9914 | 0.4771 | 0.0255  | 0.0591 | 0.6691 | 37.4047 | 0.3593 | 652001.0973 |
| Stroke | s_Bifidobacterium_adolescentis                                          | Weighted median           | 37 | -0.3309 | 0.4580 | 0.4700 | 0.0255  | 0.0591 | 0.6691 | 37.4047 | 0.3593 | 652001.0973 |
| Stroke | s_Bifidobacterium_adolescentis                                          | Inverse variance weighted | 37 | -0.3087 | 0.3203 | 0.3351 | 0.0255  | 0.0591 | 0.6691 | 37.4047 | 0.3593 | 652001.0973 |
| Stroke | s_Bifidobacterium_adolescentis                                          | Simple mode               | 37 | 0.2861  | 0.9069 | 0.7542 | 0.0255  | 0.0591 | 0.6691 | 37.4047 | 0.3593 | 652001.0973 |
| Stroke | s_Bifidobacterium_adolescentis                                          | Weighted mode             | 37 | -0.4116 | 0.8286 | 0.6224 | 0.0255  | 0.0591 | 0.6691 | 37.4047 | 0.3593 | 652001.0973 |
| Stroke | s_Bifidobacterium_animalis                                              | MR Egger                  | 37 | -0.9009 | 0.6329 | 0.1635 | 0.0627  | 0.0378 | 0.1058 | 21.9512 | 0.9684 | 1.6824      |
| Stroke | s_Bifidobacterium_animalis                                              | Weighted median           | 37 | -0.0058 | 0.2857 | 0.9839 | 0.0627  | 0.0378 | 0.1058 | 21.9512 | 0.9684 | 1.6824      |
| Stroke | s_Bifidobacterium_animalis                                              | Inverse variance weighted | 37 | 0.0920  | 0.2069 | 0.6565 | 0.0627  | 0.0378 | 0.1058 | 21.9512 | 0.9684 | 1.6824      |
| Stroke | s_Bifidobacterium_animalis                                              | Simple mode               | 37 | 0.0498  | 0.6373 | 0.9381 | 0.0627  | 0.0378 | 0.1058 | 21.9512 | 0.9684 | 1.6824      |
| Stroke | s_Bifidobacterium_animalis                                              | Weighted mode             | 37 | -0.1174 | 0.5871 | 0.8426 | 0.0627  | 0.0378 | 0.1058 | 21.9512 | 0.9684 | 1.6824      |
| Stroke | s_Bifidobacterium_bifidum                                               | MR Egger                  | 37 | -0.4398 | 1.0330 | 0.6729 | 0.0451  | 0.0616 | 0.4691 | 41.3742 | 0.2123 | 159461.7514 |
| Stroke | s_Bifidobacterium_bifidum                                               | Weighted median           | 37 | 0.1761  | 0.4564 | 0.6996 | 0.0451  | 0.0616 | 0.4691 | 41.3742 | 0.2123 | 159461.7514 |
| Stroke | s_Bifidobacterium_bifidum                                               | Inverse variance weighted | 37 | 0.2747  | 0.3354 | 0.4128 | 0.0451  | 0.0616 | 0.4691 | 41.3742 | 0.2123 | 159461.7514 |
| Stroke | s_Bifidobacterium_bifidum                                               | Simple mode               | 37 | -1.1640 | 1.0911 | 0.2932 | 0.0451  | 0.0616 | 0.4691 | 41.3742 | 0.2123 | 159461.7514 |
| Stroke | s_Bifidobacterium_bifidum                                               | Weighted mode             | 37 | -0.7213 | 0.8527 | 0.4032 | 0.0451  | 0.0616 | 0.4691 | 41.3742 | 0.2123 | 159461.7514 |
| Stroke | s_Bifidobacterium_breve                                                 | MR Egger                  | 37 | -0.7687 | 0.6412 | 0.2387 | 0.0522  | 0.0383 | 0.1809 | 34.2422 | 0.5524 | 2.2716      |
| Stroke | s_Bifidobacterium_breve                                                 | Weighted median           | 37 | 0.0631  | 0.2971 | 0.8318 | 0.0522  | 0.0383 | 0.1809 | 34.2422 | 0.5524 | 2.2716      |
| Stroke | s_Bifidobacterium_breve                                                 | Inverse variance weighted | 37 | 0.0587  | 0.2095 | 0.7794 | 0.0522  | 0.0383 | 0.1809 | 34.2422 | 0.5524 | 2.2716      |
| Stroke | s_Bifidobacterium_breve                                                 | Simple mode               | 37 | 0.0850  | 0.6120 | 0.8903 | 0.0522  | 0.0383 | 0.1809 | 34.2422 | 0.5524 | 2.2716      |
| Stroke | s_Bifidobacterium_breve                                                 | Weighted mode             | 37 | 0.1359  | 0.5926 | 0.8199 | 0.0522  | 0.0383 | 0.1809 | 34.2422 | 0.5524 | 2.2716      |
| Stroke | s_Bifidobacterium_catenulatum-Bifidobacterium_pseudocatenulatum_complex | MR Egger                  | 37 | -1.2552 | 0.7177 | 0.0891 | 0.0603  | 0.0428 | 0.1681 | 41.2786 | 0.2509 | 6.0740      |
| Stroke | s_Bifidobacterium_catenulatum-Bifidobacterium_pseudocatenulatum_complex | Weighted median           | 37 | -0.4680 | 0.3195 | 0.1429 | 0.0603  | 0.0428 | 0.1681 | 41.2786 | 0.2509 | 6.0740      |
| Stroke | s_Bifidobacterium_catenulatum-Bifidobacterium_pseudocatenulatum_complex | Inverse variance weighted | 37 | -0.3006 | 0.2377 | 0.2061 | 0.0603  | 0.0428 | 0.1681 | 41.2786 | 0.2509 | 6.0740      |
| Stroke | s_Bifidobacterium_catenulatum-Bifidobacterium_pseudocatenulatum_complex | Simple mode               | 37 | -1.1379 | 0.6912 | 0.1084 | 0.0603  | 0.0428 | 0.1681 | 41.2786 | 0.2509 | 6.0740      |
| Stroke | s_Bifidobacterium_catenulatum-Bifidobacterium_pseudocatenulatum_complex | Weighted mode             | 37 | -1.1181 | 0.6304 | 0.0846 | 0.0603  | 0.0428 | 0.1681 | 41.2786 | 0.2509 | 6.0740      |
| Stroke | s_Bifidobacterium_longum                                                | MR Egger                  | 37 | -0.8625 | 0.6466 | 0.1909 | 0.0610  | 0.0386 | 0.1231 | 47.0444 | 0.1029 | 3.9303      |
| Stroke | s_Bifidobacterium_longum                                                | Weighted median           | 37 | 0.1626  | 0.2847 | 0.5678 | 0.0610  | 0.0386 | 0.1231 | 47.0444 | 0.1029 | 3.9303      |
| Stroke | s_Bifidobacterium_longum                                                | Inverse variance weighted | 37 | 0.1032  | 0.2157 | 0.6324 | 0.0610  | 0.0386 | 0.1231 | 47.0444 | 0.1029 | 3.9303      |
| Stroke | s_Bifidobacterium_longum                                                | Simple mode               | 37 | 0.9868  | 0.7534 | 0.1986 | 0.0610  | 0.0386 | 0.1231 | 47.0444 | 0.1029 | 3.9303      |
| Stroke | s_Bifidobacterium_longum                                                | Weighted mode             | 37 | 0.9495  | 0.7313 | 0.2024 | 0.0610  | 0.0386 | 0.1231 | 47.0444 | 0.1029 | 3.9303      |
| Stroke | s_Bilophila_wadsworthia                                                 | MR Egger                  | 37 | 0.8759  | 0.5878 | 0.1451 | -0.0485 | 0.0351 | 0.1758 | 31.3048 | 0.6914 | 2.6998      |
| Stroke | s_Bilophila_wadsworthia                                                 | Weighted median           | 37 | 0.0639  | 0.2756 | 0.8167 | -0.0485 | 0.0351 | 0.1758 | 31.3048 | 0.6914 | 2.6998      |
| Stroke | s_Bilophila_wadsworthia                                                 | Inverse variance weighted | 37 | 0.1083  | 0.1921 | 0.5727 | -0.0485 | 0.0351 | 0.1758 | 31.3048 | 0.6914 | 2.6998      |
| Stroke | s_Bilophila_wadsworthia                                                 | Simple mode               | 37 | -0.4389 | 0.5544 | 0.4337 | -0.0485 | 0.0351 | 0.1758 | 31.3048 | 0.6914 | 2.6998      |
| Stroke | s_Bilophila_wadsworthia                                                 | Weighted mode             | 37 | -0.3911 | 0.5094 | 0.4476 | -0.0485 | 0.0351 | 0.1758 | 31.3048 | 0.6914 | 2.6998      |
| Stroke | s_Blautia_hansenii                                                      | MR Egger                  | 37 | 0.1276  | 0.2586 | 0.6249 | -0.0035 | 0.0154 | 0.8196 | 19.8366 | 0.9816 | 16.8733     |
| Stroke | s_Blautia_hansenii                                                      | Weighted median           | 37 | 0.0405  | 0.1177 | 0.7310 | -0.0035 | 0.0154 | 0.8196 | 19.8366 | 0.9816 | 16.8733     |
| Stroke | s_Blautia_hansenii                                                      | Inverse variance weighted | 37 | 0.0714  | 0.0845 | 0.3982 | -0.0035 | 0.0154 | 0.8196 | 19.8366 | 0.9816 | 16.8733     |
| Stroke | s_Blautia_hansenii                                                      | Simple mode               | 37 | -0.0394 | 0.2132 | 0.8544 | -0.0035 | 0.0154 | 0.8196 | 19.8366 | 0.9816 | 16.8733     |
| Stroke | s_Blautia_hansenii                                                      | Weighted mode             | 37 | 0.0067  | 0.2003 | 0.9736 | -0.0035 | 0.0154 | 0.8196 | 19.8366 | 0.9816 | 16.8733     |
| Stroke | s_Blautia_hydrogenotrophica                                             | MR Egger                  | 37 | 0.0406  | 0.2935 | 0.8909 | -0.0078 | 0.0175 | 0.6570 | 32.8452 | 0.5725 | 9.1808      |
| Stroke | s_Blautia_hydrogenotrophica                                             | Weighted median           | 37 | -0.0938 | 0.1456 | 0.5194 | -0.0078 | 0.0175 | 0.6570 | 32.8452 | 0.5725 | 9.1808      |
| Stroke | s_Blautia_hydrogenotrophica                                             | Inverse variance weighted | 37 | -0.0837 | 0.0959 | 0.3829 | -0.0078 | 0.0175 | 0.6570 | 32.8452 | 0.5725 | 9.1808      |
| Stroke | s_Blautia_hydrogenotrophica                                             | Simple mode               | 37 | -0.0184 | 0.2864 | 0.9491 | -0.0078 | 0.0175 | 0.6570 | 32.8452 | 0.5725 | 9.1808      |
| Stroke | s_Blautia_hydrogenotrophica                                             | Weighted mode             | 37 | -0.0950 | 0.2528 | 0.7094 | -0.0078 | 0.0175 | 0.6570 | 32.8452 | 0.5725 | 9.1808      |
| Stroke | s_Butyrvibrio_crossotus                                                 | MR Egger                  | 37 | 0.2753  | 0.3705 | 0.4624 | -0.0008 | 0.0221 | 0.9701 | 18.1838 | 0.9915 | 9.2749      |
| Stroke | s_Butyrvibrio_crossotus                                                 | Weighted median           | 37 | 0.2497  | 0.1714 | 0.1450 | -0.0008 | 0.0221 | 0.9701 | 18.1838 | 0.9915 | 9.2749      |
| Stroke | s_Butyrvibrio_crossotus                                                 | Inverse variance weighted | 37 | 0.2621  | 0.1211 | 0.0304 | -0.0008 | 0.0221 | 0.9701 | 18.1838 | 0.9915 | 9.2749      |
| Stroke | s_Butyrvibrio_crossotus                                                 | Simple mode               | 37 | 0.3560  | 0.3249 | 0.2805 | -0.0008 | 0.0221 | 0.9701 | 18.1838 | 0.9915 | 9.2749      |
| Stroke | s_Butyrvibrio_crossotus                                                 | Weighted mode             | 37 | 0.2415  | 0.2941 | 0.4168 | -0.0008 | 0.0221 | 0.9701 | 18.1838 | 0.9915 | 9.2749      |
| Stroke | s_Campylobacter_jejuni                                                  | MR Egger                  | 37 | 0.5232  | 0.4967 | 0.2994 | -0.0424 | 0.0296 | 0.1614 | 47.0580 | 0.1027 | 1.3533      |
| Stroke | s_Campylobacter_jejuni                                                  | Weighted median           | 37 | -0.2057 | 0.2204 | 0.3507 | -0.0424 | 0.0296 | 0.1614 | 47.0580 | 0.1027 | 1.3533      |
| Stroke | s_Campylobacter_jejuni                                                  | Inverse variance weighted | 37 | -0.1484 | 0.1646 | 0.3672 | -0.0424 | 0.0296 | 0.1614 | 47.0580 | 0.1027 | 1.3533      |
| Stroke | s_Campylobacter_jejuni                                                  | Simple mode               | 37 | 0.5347  | 0.4876 | 0.2801 | -0.0424 | 0.0296 | 0.1614 | 47.0580 | 0.1027 | 1.3533      |
| Stroke | s_Campylobacter_jejuni                                                  | Weighted mode             | 37 | -0.2358 | 0.4214 | 0.5793 | -0.0424 | 0.0296 | 0.1614 | 47.0580 | 0.1027 | 1.3533      |
| Stroke | s_Citrobacter_koseri                                                    | MR Egger                  | 37 | -0.8066 | 0.7973 | 0.3186 | 0.0544  | 0.0476 | 0.2605 | 55.0151 | 0.0221 | 9.9620      |
| Stroke | s_Citrobacter_koseri                                                    | Weighted median           | 37 | -0.0850 | 0.3172 | 0.7886 | 0.0544  | 0.0476 | 0.2605 | 55.0151 | 0.0221 | 9.9620      |
| Stroke | s_Citrobacter_koseri                                                    | Inverse variance weighted | 37 | 0.0552  | 0.2617 | 0.8330 | 0.0544  | 0.0476 | 0.2605 | 55.0151 | 0.0221 | 9.9620      |
| Stroke | s_Citrobacter_koseri                                                    | Simple mode               | 37 | 0.0543  | 0.6099 | 0.9295 | 0.0544  | 0.0476 | 0.2605 | 55.0151 | 0.0221 | 9.9620      |
| Stroke | s_Citrobacter_koseri                                                    | Weighted mode             | 37 | -0.0774 | 0.5465 | 0.8882 | 0.0544  | 0.0476 | 0.2605 | 55.0151 | 0.0221 | 9.9620      |
| Stroke | s_Citrobacter_youngae                                                   | MR Egger                  | 37 | -0.3052 | 0.8133 | 0.7097 | 0.0259  | 0.0485 | 0.5973 | 32.5637 | 0.5863 | 5.9368      |

|        |                                 |                           |    |         |        |        |         |        |        |         |        |            |
|--------|---------------------------------|---------------------------|----|---------|--------|--------|---------|--------|--------|---------|--------|------------|
| Stroke | s_Citrobacter_youngae           | Weighted median           | 37 | 0.3324  | 0.3878 | 0.3914 | 0.0259  | 0.0485 | 0.5973 | 32.5637 | 0.5863 | 5.9368     |
| Stroke | s_Citrobacter_youngae           | Inverse variance weighted | 37 | 0.1045  | 0.2658 | 0.6942 | 0.0259  | 0.0485 | 0.5973 | 32.5637 | 0.5863 | 5.9368     |
| Stroke | s_Citrobacter_youngae           | Simple mode               | 37 | 0.8898  | 0.8684 | 0.3124 | 0.0259  | 0.0485 | 0.5973 | 32.5637 | 0.5863 | 5.9368     |
| Stroke | s_Citrobacter_youngae           | Weighted mode             | 37 | 0.7673  | 0.8400 | 0.3671 | 0.0259  | 0.0485 | 0.5973 | 32.5637 | 0.5863 | 5.9368     |
| Stroke | s_Clostridiales_genomosp._BVAB3 | MR Egger                  | 37 | 1.6702  | 0.7691 | 0.0367 | -0.0952 | 0.0459 | 0.0454 | 41.7743 | 0.2343 | -9689.8738 |
| Stroke | s_Clostridiales_genomosp._BVAB3 | Weighted median           | 37 | 0.2910  | 0.3649 | 0.4251 | -0.0952 | 0.0459 | 0.0454 | 41.7743 | 0.2343 | -9689.8738 |
| Stroke | s_Clostridiales_genomosp._BVAB3 | Inverse variance weighted | 37 | 0.1614  | 0.2622 | 0.5381 | -0.0952 | 0.0459 | 0.0454 | 41.7743 | 0.2343 | -9689.8738 |
| Stroke | s_Clostridiales_genomosp._BVAB3 | Simple mode               | 37 | 0.4913  | 0.7622 | 0.5233 | -0.0952 | 0.0459 | 0.0454 | 41.7743 | 0.2343 | -9689.8738 |
| Stroke | s_Clostridiales_genomosp._BVAB3 | Weighted mode             | 37 | 0.2826  | 0.6610 | 0.6715 | -0.0952 | 0.0459 | 0.0454 | 41.7743 | 0.2343 | -9689.8738 |
| Stroke | s_Clostridium_bartlettii        | MR Egger                  | 37 | -0.2726 | 0.4796 | 0.5734 | 0.0223  | 0.0286 | 0.4404 | 44.3178 | 0.1344 | NA         |
| Stroke | s_Clostridium_bartlettii        | Weighted median           | 37 | -0.1231 | 0.1951 | 0.5283 | 0.0223  | 0.0286 | 0.4404 | 44.3178 | 0.1344 | NA         |
| Stroke | s_Clostridium_bartlettii        | Inverse variance weighted | 37 | 0.0811  | 0.1559 | 0.6028 | 0.0223  | 0.0286 | 0.4404 | 44.3178 | 0.1344 | NA         |
| Stroke | s_Clostridium_bartlettii        | Simple mode               | 37 | -0.0604 | 0.4036 | 0.8818 | 0.0223  | 0.0286 | 0.4404 | 44.3178 | 0.1344 | NA         |
| Stroke | s_Clostridium_bartlettii        | Weighted mode             | 37 | -0.2935 | 0.3543 | 0.4128 | 0.0223  | 0.0286 | 0.4404 | 44.3178 | 0.1344 | NA         |
| Stroke | s_Clostridium_bolteae           | MR Egger                  | 37 | -0.4757 | 0.5354 | 0.3803 | 0.0155  | 0.0319 | 0.6301 | 20.5616 | 0.9751 | 2.6506     |
| Stroke | s_Clostridium_bolteae           | Weighted median           | 37 | -0.2435 | 0.2569 | 0.3432 | 0.0155  | 0.0319 | 0.6301 | 20.5616 | 0.9751 | 2.6506     |
| Stroke | s_Clostridium_bolteae           | Inverse variance weighted | 37 | -0.2298 | 0.1750 | 0.1890 | 0.0155  | 0.0319 | 0.6301 | 20.5616 | 0.9751 | 2.6506     |
| Stroke | s_Clostridium_bolteae           | Simple mode               | 37 | -0.7909 | 0.5118 | 0.1311 | 0.0155  | 0.0319 | 0.6301 | 20.5616 | 0.9751 | 2.6506     |
| Stroke | s_Clostridium_bolteae           | Weighted mode             | 37 | -0.4244 | 0.4487 | 0.3506 | 0.0155  | 0.0319 | 0.6301 | 20.5616 | 0.9751 | 2.6506     |
| Stroke | s_Clostridium_difficile         | MR Egger                  | 37 | 0.2076  | 0.2401 | 0.3932 | -0.0067 | 0.0143 | 0.6435 | 41.5342 | 0.2073 | NA         |
| Stroke | s_Clostridium_difficile         | Weighted median           | 37 | 0.0004  | 0.1076 | 0.9973 | -0.0067 | 0.0143 | 0.6435 | 41.5342 | 0.2073 | NA         |
| Stroke | s_Clostridium_difficile         | Inverse variance weighted | 37 | 0.1016  | 0.0776 | 0.1904 | -0.0067 | 0.0143 | 0.6435 | 41.5342 | 0.2073 | NA         |
| Stroke | s_Clostridium_difficile         | Simple mode               | 37 | -0.0475 | 0.2189 | 0.8295 | -0.0067 | 0.0143 | 0.6435 | 41.5342 | 0.2073 | NA         |
| Stroke | s_Clostridium_difficile         | Weighted mode             | 37 | -0.0552 | 0.1892 | 0.7723 | -0.0067 | 0.0143 | 0.6435 | 41.5342 | 0.2073 | NA         |
| Stroke | s_Clostridium_leptum            | MR Egger                  | 37 | 0.9107  | 0.5458 | 0.1041 | -0.0503 | 0.0326 | 0.1314 | 24.2939 | 0.9312 | 3.0261     |
| Stroke | s_Clostridium_leptum            | Weighted median           | 37 | 0.0858  | 0.2547 | 0.7363 | -0.0503 | 0.0326 | 0.1314 | 24.2939 | 0.9312 | 3.0261     |
| Stroke | s_Clostridium_leptum            | Inverse variance weighted | 37 | 0.1138  | 0.1783 | 0.5233 | -0.0503 | 0.0326 | 0.1314 | 24.2939 | 0.9312 | 3.0261     |
| Stroke | s_Clostridium_leptum            | Simple mode               | 37 | 0.1844  | 0.4671 | 0.6953 | -0.0503 | 0.0326 | 0.1314 | 24.2939 | 0.9312 | 3.0261     |
| Stroke | s_Clostridium_leptum            | Weighted mode             | 37 | 0.1506  | 0.4114 | 0.7165 | -0.0503 | 0.0326 | 0.1314 | 24.2939 | 0.9312 | 3.0261     |
| Stroke | s_Clostridium_methylpentosum    | MR Egger                  | 37 | -0.0749 | 0.4608 | 0.8717 | 0.0156  | 0.0275 | 0.5733 | 28.9812 | 0.7531 | 1.7647     |
| Stroke | s_Clostridium_methylpentosum    | Weighted median           | 37 | 0.1503  | 0.2205 | 0.4954 | 0.0156  | 0.0275 | 0.5733 | 28.9812 | 0.7531 | 1.7647     |
| Stroke | s_Clostridium_methylpentosum    | Inverse variance weighted | 37 | 0.1727  | 0.1506 | 0.2516 | 0.0156  | 0.0275 | 0.5733 | 28.9812 | 0.7531 | 1.7647     |
| Stroke | s_Clostridium_methylpentosum    | Simple mode               | 37 | 0.1499  | 0.4414 | 0.7361 | 0.0156  | 0.0275 | 0.5733 | 28.9812 | 0.7531 | 1.7647     |
| Stroke | s_Clostridium_methylpentosum    | Weighted mode             | 37 | 0.1356  | 0.3826 | 0.7250 | 0.0156  | 0.0275 | 0.5733 | 28.9812 | 0.7531 | 1.7647     |
| Stroke | s_Clostridium_perfringens       | MR Egger                  | 37 | -0.4643 | 0.6930 | 0.5072 | 0.0363  | 0.0413 | 0.3853 | 34.1584 | 0.5086 | 1.3484     |
| Stroke | s_Clostridium_perfringens       | Weighted median           | 37 | 0.2795  | 0.3294 | 0.3962 | 0.0363  | 0.0413 | 0.3853 | 34.1584 | 0.5086 | 1.3484     |
| Stroke | s_Clostridium_perfringens       | Inverse variance weighted | 37 | 0.1115  | 0.2264 | 0.6225 | 0.0363  | 0.0413 | 0.3853 | 34.1584 | 0.5086 | 1.3484     |
| Stroke | s_Clostridium_perfringens       | Simple mode               | 37 | 0.5902  | 0.7196 | 0.4175 | 0.0363  | 0.0413 | 0.3853 | 34.1584 | 0.5086 | 1.3484     |
| Stroke | s_Clostridium_perfringens       | Weighted mode             | 37 | 0.6393  | 0.7022 | 0.3686 | 0.0363  | 0.0413 | 0.3853 | 34.1584 | 0.5086 | 1.3484     |
| Stroke | s_Clostridium_amosum            | MR Egger                  | 37 | -0.3232 | 0.5817 | 0.5820 | 0.0224  | 0.0347 | 0.5234 | 34.8371 | 0.4759 | 2.1796     |
| Stroke | s_Clostridium_amosum            | Weighted median           | 37 | 0.1608  | 0.2696 | 0.5508 | 0.0224  | 0.0347 | 0.5234 | 34.8371 | 0.4759 | 2.1796     |
| Stroke | s_Clostridium_amosum            | Inverse variance weighted | 37 | 0.0311  | 0.1901 | 0.8700 | 0.0224  | 0.0347 | 0.5234 | 34.8371 | 0.4759 | 2.1796     |
| Stroke | s_Clostridium_amosum            | Simple mode               | 37 | 0.2148  | 0.5335 | 0.6896 | 0.0224  | 0.0347 | 0.5234 | 34.8371 | 0.4759 | 2.1796     |
| Stroke | s_Clostridium_amosum            | Weighted mode             | 37 | 0.2321  | 0.4793 | 0.6311 | 0.0224  | 0.0347 | 0.5234 | 34.8371 | 0.4759 | 2.1796     |
| Stroke | s_Clostridium_saccharolyticum   | MR Egger                  | 37 | 0.7152  | 0.2706 | 0.0122 | -0.0319 | 0.0161 | 0.0560 | 33.6995 | 0.5785 | 6.0325     |
| Stroke | s_Clostridium_saccharolyticum   | Weighted median           | 37 | 0.3568  | 0.1247 | 0.0042 | -0.0319 | 0.0161 | 0.0560 | 33.6995 | 0.5785 | 6.0325     |
| Stroke | s_Clostridium_saccharolyticum   | Inverse variance weighted | 37 | 0.2096  | 0.0884 | 0.0178 | -0.0319 | 0.0161 | 0.0560 | 33.6995 | 0.5785 | 6.0325     |
| Stroke | s_Clostridium_saccharolyticum   | Simple mode               | 37 | 0.4585  | 0.2601 | 0.0864 | -0.0319 | 0.0161 | 0.0560 | 33.6995 | 0.5785 | 6.0325     |
| Stroke | s_Clostridium_saccharolyticum   | Weighted mode             | 37 | 0.4416  | 0.1940 | 0.0289 | -0.0319 | 0.0161 | 0.0560 | 33.6995 | 0.5785 | 6.0325     |
| Stroke | s_Clostridium_spiroforme        | MR Egger                  | 37 | -0.6765 | 0.4961 | 0.1814 | 0.0389  | 0.0296 | 0.1970 | 32.1657 | 0.6516 | 2.1512     |
| Stroke | s_Clostridium_spiroforme        | Weighted median           | 37 | -0.0227 | 0.2265 | 0.9203 | 0.0389  | 0.0296 | 0.1970 | 32.1657 | 0.6516 | 2.1512     |
| Stroke | s_Clostridium_spiroforme        | Inverse variance weighted | 37 | -0.0599 | 0.1622 | 0.7119 | 0.0389  | 0.0296 | 0.1970 | 32.1657 | 0.6516 | 2.1512     |
| Stroke | s_Clostridium_spiroforme        | Simple mode               | 37 | -0.2093 | 0.5118 | 0.6849 | 0.0389  | 0.0296 | 0.1970 | 32.1657 | 0.6516 | 2.1512     |
| Stroke | s_Clostridium_spiroforme        | Weighted mode             | 37 | -0.0258 | 0.4561 | 0.9552 | 0.0389  | 0.0296 | 0.1970 | 32.1657 | 0.6516 | 2.1512     |
| Stroke | s_Collinsella_aerofaciens       | MR Egger                  | 37 | -0.1656 | 0.8866 | 0.8529 | 0.0535  | 0.0529 | 0.3187 | 29.6236 | 0.7646 | 25.3227    |
| Stroke | s_Collinsella_aerofaciens       | Weighted median           | 37 | 0.7972  | 0.4257 | 0.0611 | 0.0535  | 0.0529 | 0.3187 | 29.6236 | 0.7646 | 25.3227    |
| Stroke | s_Collinsella_aerofaciens       | Inverse variance weighted | 37 | 0.6819  | 0.2897 | 0.0186 | 0.0535  | 0.0529 | 0.3187 | 29.6236 | 0.7646 | 25.3227    |
| Stroke | s_Collinsella_aerofaciens       | Simple mode               | 37 | -0.2300 | 0.9750 | 0.8149 | 0.0535  | 0.0529 | 0.3187 | 29.6236 | 0.7646 | 25.3227    |
| Stroke | s_Collinsella_aerofaciens       | Weighted mode             | 37 | 1.6761  | 1.0452 | 0.1175 | 0.0535  | 0.0529 | 0.3187 | 29.6236 | 0.7646 | 25.3227    |
| Stroke | s_Coprococcus_catus             | MR Egger                  | 37 | 0.4604  | 0.3329 | 0.1755 | -0.0176 | 0.0199 | 0.3809 | 41.8526 | 0.1978 | 1.3010     |
| Stroke | s_Coprococcus_catus             | Weighted median           | 37 | 0.0712  | 0.1484 | 0.6313 | -0.0176 | 0.0199 | 0.3809 | 41.8526 | 0.1978 | 1.3010     |

|        |                            |                           |    |         |        |        |         |        |        |         |        |           |
|--------|----------------------------|---------------------------|----|---------|--------|--------|---------|--------|--------|---------|--------|-----------|
| Stroke | s_Coprococcus_catus        | Inverse variance weighted | 37 | 0.1811  | 0.1085 | 0.0949 | -0.0176 | 0.0199 | 0.3809 | 41.8526 | 0.1978 | 1.3010    |
| Stroke | s_Coprococcus_catus        | Simple mode               | 37 | -0.1696 | 0.2859 | 0.5568 | -0.0176 | 0.0199 | 0.3809 | 41.8526 | 0.1978 | 1.3010    |
| Stroke | s_Coprococcus_catus        | Weighted mode             | 37 | -0.1250 | 0.2523 | 0.6234 | -0.0176 | 0.0199 | 0.3809 | 41.8526 | 0.1978 | 1.3010    |
| Stroke | s_Coprococcus_eutactus     | MR Egger                  | 37 | 0.2546  | 0.5365 | 0.6380 | -0.0039 | 0.0320 | 0.9040 | 29.8824 | 0.7135 | 1.8435    |
| Stroke | s_Coprococcus_eutactus     | Weighted median           | 37 | 0.2153  | 0.2498 | 0.3887 | -0.0039 | 0.0320 | 0.9040 | 29.8824 | 0.7135 | 1.8435    |
| Stroke | s_Coprococcus_eutactus     | Inverse variance weighted | 37 | 0.1930  | 0.1753 | 0.2709 | -0.0039 | 0.0320 | 0.9040 | 29.8824 | 0.7135 | 1.8435    |
| Stroke | s_Coprococcus_eutactus     | Simple mode               | 37 | 0.6548  | 0.4412 | 0.1464 | -0.0039 | 0.0320 | 0.9040 | 29.8824 | 0.7135 | 1.8435    |
| Stroke | s_Coprococcus_eutactus     | Weighted mode             | 37 | 0.3633  | 0.4023 | 0.3725 | -0.0039 | 0.0320 | 0.9040 | 29.8824 | 0.7135 | 1.8435    |
| Stroke | s_Desulfovibrio_piger      | MR Egger                  | 37 | -0.1527 | 1.1784 | 0.8977 | 0.0476  | 0.0703 | 0.5024 | 42.3194 | 0.1844 | -32.9417  |
| Stroke | s_Desulfovibrio_piger      | Weighted median           | 37 | 0.0114  | 0.5384 | 0.9832 | 0.0476  | 0.0703 | 0.5024 | 42.3194 | 0.1844 | -32.9417  |
| Stroke | s_Desulfovibrio_piger      | Inverse variance weighted | 37 | 0.6022  | 0.3822 | 0.1151 | 0.0476  | 0.0703 | 0.5024 | 42.3194 | 0.1844 | -32.9417  |
| Stroke | s_Desulfovibrio_piger      | Simple mode               | 37 | -1.1281 | 1.2180 | 0.3605 | 0.0476  | 0.0703 | 0.5024 | 42.3194 | 0.1844 | -32.9417  |
| Stroke | s_Desulfovibrio_piger      | Weighted mode             | 37 | -0.7503 | 0.9861 | 0.4517 | 0.0476  | 0.0703 | 0.5024 | 42.3194 | 0.1844 | -32.9417  |
| Stroke | s_Dorea_formicigenerans    | MR Egger                  | 37 | 0.1943  | 0.3550 | 0.5876 | -0.0017 | 0.0212 | 0.9377 | 47.6915 | 0.0746 | 2.2657    |
| Stroke | s_Dorea_formicigenerans    | Weighted median           | 37 | 0.2172  | 0.1567 | 0.1656 | -0.0017 | 0.0212 | 0.9377 | 47.6915 | 0.0746 | 2.2657    |
| Stroke | s_Dorea_formicigenerans    | Inverse variance weighted | 37 | 0.1679  | 0.1144 | 0.1423 | -0.0017 | 0.0212 | 0.9377 | 47.6915 | 0.0746 | 2.2657    |
| Stroke | s_Dorea_formicigenerans    | Simple mode               | 37 | -0.2886 | 0.3422 | 0.4046 | -0.0017 | 0.0212 | 0.9377 | 47.6915 | 0.0746 | 2.2657    |
| Stroke | s_Dorea_formicigenerans    | Weighted mode             | 37 | -0.2667 | 0.3113 | 0.3973 | -0.0017 | 0.0212 | 0.9377 | 47.6915 | 0.0746 | 2.2657    |
| Stroke | s_Dorea_longicatena        | MR Egger                  | 37 | 0.6839  | 0.3918 | 0.0897 | -0.0214 | 0.0234 | 0.3657 | 38.1116 | 0.3297 | 2.6597    |
| Stroke | s_Dorea_longicatena        | Weighted median           | 37 | 0.2434  | 0.1889 | 0.1976 | -0.0214 | 0.0234 | 0.3657 | 38.1116 | 0.3297 | 2.6597    |
| Stroke | s_Dorea_longicatena        | Inverse variance weighted | 37 | 0.3445  | 0.1277 | 0.0070 | -0.0214 | 0.0234 | 0.3657 | 38.1116 | 0.3297 | 2.6597    |
| Stroke | s_Dorea_longicatena        | Simple mode               | 37 | 0.1168  | 0.3345 | 0.7289 | -0.0214 | 0.0234 | 0.3657 | 38.1116 | 0.3297 | 2.6597    |
| Stroke | s_Dorea_longicatena        | Weighted mode             | 37 | 0.1559  | 0.2950 | 0.6004 | -0.0214 | 0.0234 | 0.3657 | 38.1116 | 0.3297 | 2.6597    |
| Stroke | s_Eggerthella_lenta        | MR Egger                  | 37 | -0.5703 | 0.6426 | 0.3809 | 0.0267  | 0.0383 | 0.4907 | 27.5861 | 0.8096 | 1.0196    |
| Stroke | s_Eggerthella_lenta        | Weighted median           | 37 | 0.1609  | 0.2929 | 0.5826 | 0.0267  | 0.0383 | 0.4907 | 27.5861 | 0.8096 | 1.0196    |
| Stroke | s_Eggerthella_lenta        | Inverse variance weighted | 37 | -0.1472 | 0.2100 | 0.4831 | 0.0267  | 0.0383 | 0.4907 | 27.5861 | 0.8096 | 1.0196    |
| Stroke | s_Eggerthella_lenta        | Simple mode               | 37 | 0.3045  | 0.5365 | 0.5739 | 0.0267  | 0.0383 | 0.4907 | 27.5861 | 0.8096 | 1.0196    |
| Stroke | s_Eggerthella_lenta        | Weighted mode             | 37 | 0.2560  | 0.5003 | 0.6119 | 0.0267  | 0.0383 | 0.4907 | 27.5861 | 0.8096 | 1.0196    |
| Stroke | s_Enterobacter_aerogenes   | MR Egger                  | 37 | -0.2011 | 0.9275 | 0.8296 | 0.0164  | 0.0553 | 0.7687 | 41.3612 | 0.2127 | 1609.7975 |
| Stroke | s_Enterobacter_aerogenes   | Weighted median           | 37 | -0.0306 | 0.4206 | 0.9420 | 0.0164  | 0.0553 | 0.7687 | 41.3612 | 0.2127 | 1609.7975 |
| Stroke | s_Enterobacter_aerogenes   | Inverse variance weighted | 37 | 0.0587  | 0.2993 | 0.8444 | 0.0164  | 0.0553 | 0.7687 | 41.3612 | 0.2127 | 1609.7975 |
| Stroke | s_Enterobacter_aerogenes   | Simple mode               | 37 | 0.5558  | 0.8918 | 0.5370 | 0.0164  | 0.0553 | 0.7687 | 41.3612 | 0.2127 | 1609.7975 |
| Stroke | s_Enterobacter_aerogenes   | Weighted mode             | 37 | -0.2976 | 0.8119 | 0.7162 | 0.0164  | 0.0553 | 0.7687 | 41.3612 | 0.2127 | 1609.7975 |
| Stroke | s_Enterobacter_cloacae     | MR Egger                  | 37 | -0.4231 | 0.9191 | 0.6481 | 0.0358  | 0.0548 | 0.5178 | 49.3148 | 0.0550 | 321.4551  |
| Stroke | s_Enterobacter_cloacae     | Weighted median           | 37 | 0.3857  | 0.3816 | 0.3121 | 0.0358  | 0.0548 | 0.5178 | 49.3148 | 0.0550 | 321.4551  |
| Stroke | s_Enterobacter_cloacae     | Inverse variance weighted | 37 | 0.1444  | 0.2980 | 0.6280 | 0.0358  | 0.0548 | 0.5178 | 49.3148 | 0.0550 | 321.4551  |
| Stroke | s_Enterobacter_cloacae     | Simple mode               | 37 | 1.5112  | 0.9488 | 0.1200 | 0.0358  | 0.0548 | 0.5178 | 49.3148 | 0.0550 | 321.4551  |
| Stroke | s_Enterobacter_cloacae     | Weighted mode             | 37 | 1.3550  | 0.8879 | 0.1357 | 0.0358  | 0.0548 | 0.5178 | 49.3148 | 0.0550 | 321.4551  |
| Stroke | s_Enterococcus_faecalis    | MR Egger                  | 37 | 0.1223  | 0.3259 | 0.7096 | -0.0038 | 0.0194 | 0.8458 | 40.2049 | 0.2506 | 6.8124    |
| Stroke | s_Enterococcus_faecalis    | Weighted median           | 37 | 0.1520  | 0.1496 | 0.3093 | -0.0038 | 0.0194 | 0.8458 | 40.2049 | 0.2506 | 6.8124    |
| Stroke | s_Enterococcus_faecalis    | Inverse variance weighted | 37 | 0.0620  | 0.1050 | 0.5549 | -0.0038 | 0.0194 | 0.8458 | 40.2049 | 0.2506 | 6.8124    |
| Stroke | s_Enterococcus_faecalis    | Simple mode               | 37 | 0.0305  | 0.2947 | 0.9182 | -0.0038 | 0.0194 | 0.8458 | 40.2049 | 0.2506 | 6.8124    |
| Stroke | s_Enterococcus_faecalis    | Weighted mode             | 37 | 0.0881  | 0.2869 | 0.7604 | -0.0038 | 0.0194 | 0.8458 | 40.2049 | 0.2506 | 6.8124    |
| Stroke | s_Enterococcus_faecium     | MR Egger                  | 37 | 0.3350  | 0.3366 | 0.3265 | -0.0108 | 0.0201 | 0.5931 | 43.3030 | 0.1583 | 3.2552    |
| Stroke | s_Enterococcus_faecium     | Weighted median           | 37 | 0.1294  | 0.1492 | 0.3857 | -0.0108 | 0.0201 | 0.5931 | 43.3030 | 0.1583 | 3.2552    |
| Stroke | s_Enterococcus_faecium     | Inverse variance weighted | 37 | 0.1634  | 0.1089 | 0.1336 | -0.0108 | 0.0201 | 0.5931 | 43.3030 | 0.1583 | 3.2552    |
| Stroke | s_Enterococcus_faecium     | Simple mode               | 37 | -0.0170 | 0.3155 | 0.9574 | -0.0108 | 0.0201 | 0.5931 | 43.3030 | 0.1583 | 3.2552    |
| Stroke | s_Enterococcus_faecium     | Weighted mode             | 37 | 0.0028  | 0.2972 | 0.9925 | -0.0108 | 0.0201 | 0.5931 | 43.3030 | 0.1583 | 3.2552    |
| Stroke | s_Escherichia_coli         | MR Egger                  | 37 | -0.2770 | 0.7488 | 0.7137 | 0.0251  | 0.0447 | 0.5773 | 50.9773 | 0.0396 | 3.9367    |
| Stroke | s_Escherichia_coli         | Weighted median           | 37 | 0.2209  | 0.3066 | 0.4712 | 0.0251  | 0.0447 | 0.5773 | 50.9773 | 0.0396 | 3.9367    |
| Stroke | s_Escherichia_coli         | Inverse variance weighted | 37 | 0.1212  | 0.2423 | 0.6170 | 0.0251  | 0.0447 | 0.5773 | 50.9773 | 0.0396 | 3.9367    |
| Stroke | s_Escherichia_coli         | Simple mode               | 37 | 0.2774  | 0.5912 | 0.6417 | 0.0251  | 0.0447 | 0.5773 | 50.9773 | 0.0396 | 3.9367    |
| Stroke | s_Escherichia_coli         | Weighted mode             | 37 | 0.2570  | 0.4839 | 0.5987 | 0.0251  | 0.0447 | 0.5773 | 50.9773 | 0.0396 | 3.9367    |
| Stroke | s_Eubacterium_biforme      | MR Egger                  | 37 | 0.0303  | 0.5782 | 0.9585 | 0.0180  | 0.0345 | 0.6059 | 26.5984 | 0.8453 | 58.3945   |
| Stroke | s_Eubacterium_biforme      | Weighted median           | 37 | 0.4255  | 0.2706 | 0.1159 | 0.0180  | 0.0345 | 0.6059 | 26.5984 | 0.8453 | 58.3945   |
| Stroke | s_Eubacterium_biforme      | Inverse variance weighted | 37 | 0.3148  | 0.1889 | 0.0957 | 0.0180  | 0.0345 | 0.6059 | 26.5984 | 0.8453 | 58.3945   |
| Stroke | s_Eubacterium_biforme      | Simple mode               | 37 | -0.1296 | 0.5023 | 0.7979 | 0.0180  | 0.0345 | 0.6059 | 26.5984 | 0.8453 | 58.3945   |
| Stroke | s_Eubacterium_biforme      | Weighted mode             | 37 | 0.0473  | 0.4524 | 0.9174 | 0.0180  | 0.0345 | 0.6059 | 26.5984 | 0.8453 | 58.3945   |
| Stroke | s_Eubacterium_cylindroides | MR Egger                  | 37 | 0.6904  | 0.3042 | 0.0295 | -0.0208 | 0.0182 | 0.2586 | 27.5026 | 0.8444 | 6.5179    |
| Stroke | s_Eubacterium_cylindroides | Weighted median           | 37 | 0.4147  | 0.1397 | 0.0030 | -0.0208 | 0.0182 | 0.2586 | 27.5026 | 0.8444 | 6.5179    |
| Stroke | s_Eubacterium_cylindroides | Inverse variance weighted | 37 | 0.3601  | 0.0994 | 0.0003 | -0.0208 | 0.0182 | 0.2586 | 27.5026 | 0.8444 | 6.5179    |

|        |                                |                           |    |         |        |        |         |        |        |         |        |          |
|--------|--------------------------------|---------------------------|----|---------|--------|--------|---------|--------|--------|---------|--------|----------|
| Stroke | s_Eubacterium_cylindroides     | Simple mode               | 37 | 0.4254  | 0.2965 | 0.1600 | -0.0208 | 0.0182 | 0.2586 | 27.5026 | 0.8444 | 6.5179   |
| Stroke | s_Eubacterium_cylindroides     | Weighted mode             | 37 | 0.4691  | 0.2438 | 0.0623 | -0.0208 | 0.0182 | 0.2586 | 27.5026 | 0.8444 | 6.5179   |
| Stroke | s_Eubacterium_dolichum         | MR Egger                  | 37 | 0.6729  | 0.3580 | 0.0685 | -0.0268 | 0.0214 | 0.2178 | 40.6064 | 0.2745 | 4.4667   |
| Stroke | s_Eubacterium_dolichum         | Weighted median           | 37 | 0.4266  | 0.1633 | 0.0090 | -0.0268 | 0.0214 | 0.2178 | 40.6064 | 0.2745 | 4.4667   |
| Stroke | s_Eubacterium_dolichum         | Inverse variance weighted | 37 | 0.2484  | 0.1179 | 0.0352 | -0.0268 | 0.0214 | 0.2178 | 40.6064 | 0.2745 | 4.4667   |
| Stroke | s_Eubacterium_dolichum         | Simple mode               | 37 | 0.6017  | 0.3398 | 0.0851 | -0.0268 | 0.0214 | 0.2178 | 40.6064 | 0.2745 | 4.4667   |
| Stroke | s_Eubacterium_dolichum         | Weighted mode             | 37 | 0.5691  | 0.2917 | 0.0589 | -0.0268 | 0.0214 | 0.2178 | 40.6064 | 0.2745 | 4.4667   |
| Stroke | s_Eubacterium_eligens          | MR Egger                  | 37 | -0.1777 | 0.7095 | 0.8037 | 0.0144  | 0.0423 | 0.7349 | 27.4281 | 0.8156 | 1.0857   |
| Stroke | s_Eubacterium_eligens          | Weighted median           | 37 | -0.0047 | 0.3297 | 0.9886 | 0.0144  | 0.0423 | 0.7349 | 27.4281 | 0.8156 | 1.0857   |
| Stroke | s_Eubacterium_eligens          | Inverse variance weighted | 37 | 0.0512  | 0.2318 | 0.8252 | 0.0144  | 0.0423 | 0.7349 | 27.4281 | 0.8156 | 1.0857   |
| Stroke | s_Eubacterium_eligens          | Simple mode               | 37 | -0.0067 | 0.6115 | 0.9913 | 0.0144  | 0.0423 | 0.7349 | 27.4281 | 0.8156 | 1.0857   |
| Stroke | s_Eubacterium_eligens          | Weighted mode             | 37 | -0.0605 | 0.5370 | 0.9110 | 0.0144  | 0.0423 | 0.7349 | 27.4281 | 0.8156 | 1.0857   |
| Stroke | s_Eubacterium_hallii           | MR Egger                  | 37 | -0.0246 | 0.4223 | 0.9539 | 0.0124  | 0.0252 | 0.6243 | 35.8432 | 0.4287 | 1.0615   |
| Stroke | s_Eubacterium_hallii           | Weighted median           | 37 | 0.1570  | 0.1968 | 0.4248 | 0.0124  | 0.0252 | 0.6243 | 35.8432 | 0.4287 | 1.0615   |
| Stroke | s_Eubacterium_hallii           | Inverse variance weighted | 37 | 0.1726  | 0.1366 | 0.2063 | 0.0124  | 0.0252 | 0.6243 | 35.8432 | 0.4287 | 1.0615   |
| Stroke | s_Eubacterium_hallii           | Simple mode               | 37 | 0.1361  | 0.4071 | 0.7401 | 0.0124  | 0.0252 | 0.6243 | 35.8432 | 0.4287 | 1.0615   |
| Stroke | s_Eubacterium_hallii           | Weighted mode             | 37 | 0.0840  | 0.3743 | 0.8237 | 0.0124  | 0.0252 | 0.6243 | 35.8432 | 0.4287 | 1.0615   |
| Stroke | s_Eubacterium_limosum          | MR Egger                  | 37 | 0.0523  | 0.3694 | 0.8882 | 0.0068  | 0.0220 | 0.7579 | 26.8948 | 0.8350 | 8.6795   |
| Stroke | s_Eubacterium_limosum          | Weighted median           | 37 | 0.1510  | 0.1739 | 0.3851 | 0.0068  | 0.0220 | 0.7579 | 26.8948 | 0.8350 | 8.6795   |
| Stroke | s_Eubacterium_limosum          | Inverse variance weighted | 37 | 0.1607  | 0.1207 | 0.1831 | 0.0068  | 0.0220 | 0.7579 | 26.8948 | 0.8350 | 8.6795   |
| Stroke | s_Eubacterium_limosum          | Simple mode               | 37 | 0.2372  | 0.4013 | 0.5581 | 0.0068  | 0.0220 | 0.7579 | 26.8948 | 0.8350 | 8.6795   |
| Stroke | s_Eubacterium_limosum          | Weighted mode             | 37 | 0.2122  | 0.3771 | 0.5770 | 0.0068  | 0.0220 | 0.7579 | 26.8948 | 0.8350 | 8.6795   |
| Stroke | s_Eubacterium_rectale          | MR Egger                  | 37 | 0.4926  | 0.4851 | 0.3169 | -0.0127 | 0.0289 | 0.6624 | 29.8014 | 0.7171 | 2.1582   |
| Stroke | s_Eubacterium_rectale          | Weighted median           | 37 | 0.4171  | 0.2253 | 0.0642 | -0.0127 | 0.0289 | 0.6624 | 29.8014 | 0.7171 | 2.1582   |
| Stroke | s_Eubacterium_rectale          | Inverse variance weighted | 37 | 0.2907  | 0.1585 | 0.0667 | -0.0127 | 0.0289 | 0.6624 | 29.8014 | 0.7171 | 2.1582   |
| Stroke | s_Eubacterium_rectale          | Simple mode               | 37 | 0.4482  | 0.4501 | 0.3260 | -0.0127 | 0.0289 | 0.6624 | 29.8014 | 0.7171 | 2.1582   |
| Stroke | s_Eubacterium_rectale          | Weighted mode             | 37 | 0.4036  | 0.4211 | 0.3443 | -0.0127 | 0.0289 | 0.6624 | 29.8014 | 0.7171 | 2.1582   |
| Stroke | s_Eubacterium_saburreum        | MR Egger                  | 37 | 0.6193  | 0.4881 | 0.2129 | -0.0277 | 0.0291 | 0.3478 | 31.7937 | 0.6237 | 2.7640   |
| Stroke | s_Eubacterium_saburreum        | Weighted median           | 37 | -0.0132 | 0.2303 | 0.9543 | -0.0277 | 0.0291 | 0.3478 | 31.7937 | 0.6237 | 2.7640   |
| Stroke | s_Eubacterium_saburreum        | Inverse variance weighted | 37 | 0.1803  | 0.1595 | 0.2584 | -0.0277 | 0.0291 | 0.3478 | 31.7937 | 0.6237 | 2.7640   |
| Stroke | s_Eubacterium_saburreum        | Simple mode               | 37 | -0.1369 | 0.5127 | 0.7910 | -0.0277 | 0.0291 | 0.3478 | 31.7937 | 0.6237 | 2.7640   |
| Stroke | s_Eubacterium_saburreum        | Weighted mode             | 37 | -0.2311 | 0.4433 | 0.6053 | -0.0277 | 0.0291 | 0.3478 | 31.7937 | 0.6237 | 2.7640   |
| Stroke | s_Eubacterium_siraeum          | MR Egger                  | 37 | 0.0006  | 0.5818 | 0.9992 | 0.0020  | 0.0347 | 0.9546 | 30.8808 | 0.6673 | 2.3675   |
| Stroke | s_Eubacterium_siraeum          | Weighted median           | 37 | -0.0923 | 0.2695 | 0.7320 | 0.0020  | 0.0347 | 0.9546 | 30.8808 | 0.6673 | 2.3675   |
| Stroke | s_Eubacterium_siraeum          | Inverse variance weighted | 37 | 0.0321  | 0.1901 | 0.8658 | 0.0020  | 0.0347 | 0.9546 | 30.8808 | 0.6673 | 2.3675   |
| Stroke | s_Eubacterium_siraeum          | Simple mode               | 37 | -0.2817 | 0.4940 | 0.5720 | 0.0020  | 0.0347 | 0.9546 | 30.8808 | 0.6673 | 2.3675   |
| Stroke | s_Eubacterium_siraeum          | Weighted mode             | 37 | -0.2817 | 0.4711 | 0.5535 | 0.0020  | 0.0347 | 0.9546 | 30.8808 | 0.6673 | 2.3675   |
| Stroke | s_Eubacterium_ventriosum       | MR Egger                  | 37 | 0.1720  | 0.4075 | 0.6755 | -0.0050 | 0.0243 | 0.8394 | 27.2984 | 0.8204 | 5.7469   |
| Stroke | s_Eubacterium_ventriosum       | Weighted median           | 37 | 0.0270  | 0.1908 | 0.8876 | -0.0050 | 0.0243 | 0.8394 | 27.2984 | 0.8204 | 5.7469   |
| Stroke | s_Eubacterium_ventriosum       | Inverse variance weighted | 37 | 0.0934  | 0.1332 | 0.4831 | -0.0050 | 0.0243 | 0.8394 | 27.2984 | 0.8204 | 5.7469   |
| Stroke | s_Eubacterium_ventriosum       | Simple mode               | 37 | 0.0451  | 0.3923 | 0.9092 | -0.0050 | 0.0243 | 0.8394 | 27.2984 | 0.8204 | 5.7469   |
| Stroke | s_Eubacterium_ventriosum       | Weighted mode             | 37 | 0.0634  | 0.3555 | 0.8595 | -0.0050 | 0.0243 | 0.8394 | 27.2984 | 0.8204 | 5.7469   |
| Stroke | s_Faecalibacterium_prausnitzii | MR Egger                  | 37 | -0.1084 | 0.4737 | 0.8203 | 0.0237  | 0.0283 | 0.4077 | 35.4911 | 0.4451 | 1.1914   |
| Stroke | s_Faecalibacterium_prausnitzii | Weighted median           | 37 | 0.0968  | 0.2311 | 0.6752 | 0.0237  | 0.0283 | 0.4077 | 35.4911 | 0.4451 | 1.1914   |
| Stroke | s_Faecalibacterium_prausnitzii | Inverse variance weighted | 37 | 0.2668  | 0.1541 | 0.0834 | 0.0237  | 0.0283 | 0.4077 | 35.4911 | 0.4451 | 1.1914   |
| Stroke | s_Faecalibacterium_prausnitzii | Simple mode               | 37 | -0.3774 | 0.4345 | 0.3907 | 0.0237  | 0.0283 | 0.4077 | 35.4911 | 0.4451 | 1.1914   |
| Stroke | s_Faecalibacterium_prausnitzii | Weighted mode             | 37 | -0.2850 | 0.3781 | 0.4560 | 0.0237  | 0.0283 | 0.4077 | 35.4911 | 0.4451 | 1.1914   |
| Stroke | s_Gemella_sanguinis            | MR Egger                  | 37 | -0.2118 | 0.4452 | 0.6372 | 0.0186  | 0.0266 | 0.4878 | 24.9715 | 0.8953 | 1.1368   |
| Stroke | s_Gemella_sanguinis            | Weighted median           | 37 | 0.0261  | 0.2064 | 0.8993 | 0.0186  | 0.0266 | 0.4878 | 24.9715 | 0.8953 | 1.1368   |
| Stroke | s_Gemella_sanguinis            | Inverse variance weighted | 37 | 0.0832  | 0.1455 | 0.5674 | 0.0186  | 0.0266 | 0.4878 | 24.9715 | 0.8953 | 1.1368   |
| Stroke | s_Gemella_sanguinis            | Simple mode               | 37 | -0.0451 | 0.3903 | 0.9087 | 0.0186  | 0.0266 | 0.4878 | 24.9715 | 0.8953 | 1.1368   |
| Stroke | s_Gemella_sanguinis            | Weighted mode             | 37 | 0.0346  | 0.3417 | 0.9198 | 0.0186  | 0.0266 | 0.4878 | 24.9715 | 0.8953 | 1.1368   |
| Stroke | s_Granulicatella_adiacens      | MR Egger                  | 37 | -0.3430 | 0.3524 | 0.3370 | 0.0161  | 0.0210 | 0.4499 | 26.2140 | 0.8582 | 3.1216   |
| Stroke | s_Granulicatella_adiacens      | Weighted median           | 37 | -0.1809 | 0.1571 | 0.2495 | 0.0161  | 0.0210 | 0.4499 | 26.2140 | 0.8582 | 3.1216   |
| Stroke | s_Granulicatella_adiacens      | Inverse variance weighted | 37 | -0.0885 | 0.1152 | 0.4422 | 0.0161  | 0.0210 | 0.4499 | 26.2140 | 0.8582 | 3.1216   |
| Stroke | s_Granulicatella_adiacens      | Simple mode               | 37 | -0.4478 | 0.3355 | 0.1903 | 0.0161  | 0.0210 | 0.4499 | 26.2140 | 0.8582 | 3.1216   |
| Stroke | s_Granulicatella_adiacens      | Weighted mode             | 37 | -0.4306 | 0.3068 | 0.1690 | 0.0161  | 0.0210 | 0.4499 | 26.2140 | 0.8582 | 3.1216   |
| Stroke | s_Haemophilus_influenzae       | MR Egger                  | 37 | -0.6907 | 0.7447 | 0.3600 | 0.0278  | 0.0444 | 0.5356 | 32.1179 | 0.6080 | 546.0209 |
| Stroke | s_Haemophilus_influenzae       | Weighted median           | 37 | -0.3968 | 0.3609 | 0.2715 | 0.0278  | 0.0444 | 0.5356 | 32.1179 | 0.6080 | 546.0209 |
| Stroke | s_Haemophilus_influenzae       | Inverse variance weighted | 37 | -0.2504 | 0.2433 | 0.3034 | 0.0278  | 0.0444 | 0.5356 | 32.1179 | 0.6080 | 546.0209 |
| Stroke | s_Haemophilus_influenzae       | Simple mode               | 37 | -0.2043 | 0.6846 | 0.7671 | 0.0278  | 0.0444 | 0.5356 | 32.1179 | 0.6080 | 546.0209 |

|        |                                  |                           |    |         |        |        |         |        |        |         |        |           |
|--------|----------------------------------|---------------------------|----|---------|--------|--------|---------|--------|--------|---------|--------|-----------|
| Stroke | s_Haemophilus_influenzae         | Weighted mode             | 37 | -0.3455 | 0.5736 | 0.5507 | 0.0278  | 0.0444 | 0.5356 | 32.1179 | 0.6080 | 546.0209  |
| Stroke | s_Haemophilus_pittmaniae         | MR Egger                  | 37 | -0.1622 | 0.7496 | 0.8300 | -0.0038 | 0.0447 | 0.9322 | 33.9985 | 0.5163 | 1290.9730 |
| Stroke | s_Haemophilus_pittmaniae         | Weighted median           | 37 | -0.3141 | 0.3592 | 0.3819 | -0.0038 | 0.0447 | 0.9322 | 33.9985 | 0.5163 | 1290.9730 |
| Stroke | s_Haemophilus_pittmaniae         | Inverse variance weighted | 37 | -0.2228 | 0.2450 | 0.3630 | -0.0038 | 0.0447 | 0.9322 | 33.9985 | 0.5163 | 1290.9730 |
| Stroke | s_Haemophilus_pittmaniae         | Simple mode               | 37 | -0.7411 | 0.7427 | 0.3250 | -0.0038 | 0.0447 | 0.9322 | 33.9985 | 0.5163 | 1290.9730 |
| Stroke | s_Haemophilus_pittmaniae         | Weighted mode             | 37 | -0.5570 | 0.6420 | 0.3914 | -0.0038 | 0.0447 | 0.9322 | 33.9985 | 0.5163 | 1290.9730 |
| Stroke | s_Holdemania_filiformis          | MR Egger                  | 37 | -0.3319 | 0.3774 | 0.3852 | 0.0224  | 0.0225 | 0.3260 | 33.8145 | 0.5730 | 1.8779    |
| Stroke | s_Holdemania_filiformis          | Weighted median           | 37 | -0.1131 | 0.1700 | 0.5058 | 0.0224  | 0.0225 | 0.3260 | 33.8145 | 0.5730 | 1.8779    |
| Stroke | s_Holdemania_filiformis          | Inverse variance weighted | 37 | 0.0235  | 0.1233 | 0.8490 | 0.0224  | 0.0225 | 0.3260 | 33.8145 | 0.5730 | 1.8779    |
| Stroke | s_Holdemania_filiformis          | Simple mode               | 37 | -0.3350 | 0.3769 | 0.3800 | 0.0224  | 0.0225 | 0.3260 | 33.8145 | 0.5730 | 1.8779    |
| Stroke | s_Holdemania_filiformis          | Weighted mode             | 37 | -0.3566 | 0.3121 | 0.2608 | 0.0224  | 0.0225 | 0.3260 | 33.8145 | 0.5730 | 1.8779    |
| Stroke | s_Klebsiella_oxytoca             | MR Egger                  | 37 | -0.0050 | 0.8861 | 0.9955 | 0.0129  | 0.0529 | 0.8082 | 47.6059 | 0.0758 | 32.4148   |
| Stroke | s_Klebsiella_oxytoca             | Weighted median           | 37 | 0.0380  | 0.3698 | 0.9182 | 0.0129  | 0.0529 | 0.8082 | 47.6059 | 0.0758 | 32.4148   |
| Stroke | s_Klebsiella_oxytoca             | Inverse variance weighted | 37 | 0.1998  | 0.2858 | 0.4844 | 0.0129  | 0.0529 | 0.8082 | 47.6059 | 0.0758 | 32.4148   |
| Stroke | s_Klebsiella_oxytoca             | Simple mode               | 37 | -0.3641 | 0.8273 | 0.6625 | 0.0129  | 0.0529 | 0.8082 | 47.6059 | 0.0758 | 32.4148   |
| Stroke | s_Klebsiella_oxytoca             | Weighted mode             | 37 | -0.4333 | 0.6720 | 0.5232 | 0.0129  | 0.0529 | 0.8082 | 47.6059 | 0.0758 | 32.4148   |
| Stroke | s_Lachnospiraceae_oral_taxon_107 | MR Egger                  | 37 | 0.3087  | 0.3514 | 0.3857 | -0.0067 | 0.0210 | 0.7497 | 40.1214 | 0.2535 | 3.2256    |
| Stroke | s_Lachnospiraceae_oral_taxon_107 | Weighted median           | 37 | 0.2436  | 0.1655 | 0.1410 | -0.0067 | 0.0210 | 0.7497 | 40.1214 | 0.2535 | 3.2256    |
| Stroke | s_Lachnospiraceae_oral_taxon_107 | Inverse variance weighted | 37 | 0.2019  | 0.1134 | 0.0749 | -0.0067 | 0.0210 | 0.7497 | 40.1214 | 0.2535 | 3.2256    |
| Stroke | s_Lachnospiraceae_oral_taxon_107 | Simple mode               | 37 | 0.4471  | 0.3673 | 0.2315 | -0.0067 | 0.0210 | 0.7497 | 40.1214 | 0.2535 | 3.2256    |
| Stroke | s_Lachnospiraceae_oral_taxon_107 | Weighted mode             | 37 | 0.4086  | 0.3334 | 0.2284 | -0.0067 | 0.0210 | 0.7497 | 40.1214 | 0.2535 | 3.2256    |
| Stroke | s_Lactobacillus_ruminis          | MR Egger                  | 37 | -0.0606 | 0.4042 | 0.8817 | 0.0128  | 0.0241 | 0.5995 | 28.5312 | 0.7721 | 5.0735    |
| Stroke | s_Lactobacillus_ruminis          | Weighted median           | 37 | 0.2500  | 0.1951 | 0.2001 | 0.0128  | 0.0241 | 0.5995 | 28.5312 | 0.7721 | 5.0735    |
| Stroke | s_Lactobacillus_ruminis          | Inverse variance weighted | 37 | 0.1419  | 0.1321 | 0.2828 | 0.0128  | 0.0241 | 0.5995 | 28.5312 | 0.7721 | 5.0735    |
| Stroke | s_Lactobacillus_ruminis          | Simple mode               | 37 | 0.5062  | 0.4086 | 0.2234 | 0.0128  | 0.0241 | 0.5995 | 28.5312 | 0.7721 | 5.0735    |
| Stroke | s_Lactobacillus_ruminis          | Weighted mode             | 37 | 0.4159  | 0.3667 | 0.2642 | 0.0128  | 0.0241 | 0.5995 | 28.5312 | 0.7721 | 5.0735    |
| Stroke | s_Marvinbryantia_formatexigens   | MR Egger                  | 37 | 0.6930  | 0.4056 | 0.0964 | -0.0314 | 0.0242 | 0.2028 | 31.1925 | 0.6965 | 2.9076    |
| Stroke | s_Marvinbryantia_formatexigens   | Weighted median           | 37 | 0.3176  | 0.1908 | 0.0961 | -0.0314 | 0.0242 | 0.2028 | 31.1925 | 0.6965 | 2.9076    |
| Stroke | s_Marvinbryantia_formatexigens   | Inverse variance weighted | 37 | 0.1954  | 0.1326 | 0.1404 | -0.0314 | 0.0242 | 0.2028 | 31.1925 | 0.6965 | 2.9076    |
| Stroke | s_Marvinbryantia_formatexigens   | Simple mode               | 37 | 0.5563  | 0.3728 | 0.1443 | -0.0314 | 0.0242 | 0.2028 | 31.1925 | 0.6965 | 2.9076    |
| Stroke | s_Marvinbryantia_formatexigens   | Weighted mode             | 37 | 0.4741  | 0.3290 | 0.1582 | -0.0314 | 0.0242 | 0.2028 | 31.1925 | 0.6965 | 2.9076    |
| Stroke | s_Megasphaera_elsdenii           | MR Egger                  | 37 | 1.3612  | 0.9655 | 0.1674 | -0.0521 | 0.0576 | 0.3723 | 41.0994 | 0.2209 | -40.3580  |
| Stroke | s_Megasphaera_elsdenii           | Weighted median           | 37 | 0.3860  | 0.4198 | 0.3578 | -0.0521 | 0.0576 | 0.3723 | 41.0994 | 0.2209 | -40.3580  |
| Stroke | s_Megasphaera_elsdenii           | Inverse variance weighted | 37 | 0.5365  | 0.3147 | 0.0882 | -0.0521 | 0.0576 | 0.3723 | 41.0994 | 0.2209 | -40.3580  |
| Stroke | s_Megasphaera_elsdenii           | Simple mode               | 37 | 0.1841  | 0.8124 | 0.8220 | -0.0521 | 0.0576 | 0.3723 | 41.0994 | 0.2209 | -40.3580  |
| Stroke | s_Megasphaera_elsdenii           | Weighted mode             | 37 | 0.3054  | 0.7100 | 0.6697 | -0.0521 | 0.0576 | 0.3723 | 41.0994 | 0.2209 | -40.3580  |
| Stroke | s_Megasphaera_genomosp._type_1   | MR Egger                  | 37 | 0.0526  | 0.7670 | 0.9457 | 0.0029  | 0.0457 | 0.9495 | 37.6685 | 0.3481 | 10.9438   |
| Stroke | s_Megasphaera_genomosp._type_1   | Weighted median           | 37 | 0.1836  | 0.3459 | 0.5956 | 0.0029  | 0.0457 | 0.9495 | 37.6685 | 0.3481 | 10.9438   |
| Stroke | s_Megasphaera_genomosp._type_1   | Inverse variance weighted | 37 | 0.0989  | 0.2466 | 0.6884 | 0.0029  | 0.0457 | 0.9495 | 37.6685 | 0.3481 | 10.9438   |
| Stroke | s_Megasphaera_genomosp._type_1   | Simple mode               | 37 | 0.1405  | 0.8132 | 0.8638 | 0.0029  | 0.0457 | 0.9495 | 37.6685 | 0.3481 | 10.9438   |
| Stroke | s_Megasphaera_genomosp._type_1   | Weighted mode             | 37 | -0.2475 | 0.7236 | 0.7344 | 0.0029  | 0.0457 | 0.9495 | 37.6685 | 0.3481 | 10.9438   |
| Stroke | s_Megasphaera_micronuciformis    | MR Egger                  | 37 | -0.5445 | 0.5264 | 0.3080 | 0.0173  | 0.0314 | 0.5857 | 42.3181 | 0.1844 | 2.1009    |
| Stroke | s_Megasphaera_micronuciformis    | Weighted median           | 37 | -0.2204 | 0.2281 | 0.3339 | 0.0173  | 0.0314 | 0.5857 | 42.3181 | 0.1844 | 2.1009    |
| Stroke | s_Megasphaera_micronuciformis    | Inverse variance weighted | 37 | -0.2708 | 0.1703 | 0.1118 | 0.0173  | 0.0314 | 0.5857 | 42.3181 | 0.1844 | 2.1009    |
| Stroke | s_Megasphaera_micronuciformis    | Simple mode               | 37 | -0.1657 | 0.4920 | 0.7382 | 0.0173  | 0.0314 | 0.5857 | 42.3181 | 0.1844 | 2.1009    |
| Stroke | s_Megasphaera_micronuciformis    | Weighted mode             | 37 | -0.1048 | 0.3514 | 0.7671 | 0.0173  | 0.0314 | 0.5857 | 42.3181 | 0.1844 | 2.1009    |
| Stroke | s_Mitsuokella_multacida          | MR Egger                  | 37 | 0.6613  | 0.6940 | 0.3472 | -0.0206 | 0.0414 | 0.6215 | 34.7238 | 0.4814 | 3103.1121 |
| Stroke | s_Mitsuokella_multacida          | Weighted median           | 37 | 0.4823  | 0.3129 | 0.1233 | -0.0206 | 0.0414 | 0.6215 | 34.7238 | 0.4814 | 3103.1121 |
| Stroke | s_Mitsuokella_multacida          | Inverse variance weighted | 37 | 0.3346  | 0.2268 | 0.1401 | -0.0206 | 0.0414 | 0.6215 | 34.7238 | 0.4814 | 3103.1121 |
| Stroke | s_Mitsuokella_multacida          | Simple mode               | 37 | 0.8548  | 0.6805 | 0.2171 | -0.0206 | 0.0414 | 0.6215 | 34.7238 | 0.4814 | 3103.1121 |
| Stroke | s_Mitsuokella_multacida          | Weighted mode             | 37 | 0.9198  | 0.6054 | 0.1374 | -0.0206 | 0.0414 | 0.6215 | 34.7238 | 0.4814 | 3103.1121 |
| Stroke | s_Mobiluncus_curtisii            | MR Egger                  | 37 | 0.8606  | 0.5278 | 0.1119 | -0.0529 | 0.0315 | 0.1021 | 30.8403 | 0.7123 | 1.6343    |
| Stroke | s_Mobiluncus_curtisii            | Weighted median           | 37 | 0.1897  | 0.2479 | 0.4442 | -0.0529 | 0.0315 | 0.1021 | 30.8403 | 0.7123 | 1.6343    |
| Stroke | s_Mobiluncus_curtisii            | Inverse variance weighted | 37 | 0.0231  | 0.1724 | 0.8936 | -0.0529 | 0.0315 | 0.1021 | 30.8403 | 0.7123 | 1.6343    |
| Stroke | s_Mobiluncus_curtisii            | Simple mode               | 37 | 0.3148  | 0.4382 | 0.4772 | -0.0529 | 0.0315 | 0.1021 | 30.8403 | 0.7123 | 1.6343    |
| Stroke | s_Mobiluncus_curtisii            | Weighted mode             | 37 | 0.2697  | 0.3679 | 0.4682 | -0.0529 | 0.0315 | 0.1021 | 30.8403 | 0.7123 | 1.6343    |
| Stroke | s_Oribacterium_sinus             | MR Egger                  | 37 | -0.2993 | 0.2852 | 0.3012 | 0.0085  | 0.0170 | 0.6224 | 24.4720 | 0.9084 | 8.7885    |
| Stroke | s_Oribacterium_sinus             | Weighted median           | 37 | -0.2338 | 0.1299 | 0.0720 | 0.0085  | 0.0170 | 0.6224 | 24.4720 | 0.9084 | 8.7885    |
| Stroke | s_Oribacterium_sinus             | Inverse variance weighted | 37 | -0.1653 | 0.0932 | 0.0761 | 0.0085  | 0.0170 | 0.6224 | 24.4720 | 0.9084 | 8.7885    |
| Stroke | s_Oribacterium_sinus             | Simple mode               | 37 | -0.2305 | 0.2491 | 0.3608 | 0.0085  | 0.0170 | 0.6224 | 24.4720 | 0.9084 | 8.7885    |
| Stroke | s_Oribacterium_sinus             | Weighted mode             | 37 | -0.2787 | 0.2096 | 0.1920 | 0.0085  | 0.0170 | 0.6224 | 24.4720 | 0.9084 | 8.7885    |

|        |                                      |                           |    |         |        |        |         |        |        |         |        |            |
|--------|--------------------------------------|---------------------------|----|---------|--------|--------|---------|--------|--------|---------|--------|------------|
| Stroke | s_Parabacteroides_distasonis         | MR Egger                  | 37 | 0.3465  | 0.3211 | 0.2879 | -0.0316 | 0.0192 | 0.1075 | 33.4885 | 0.5886 | 7.4863     |
| Stroke | s_Parabacteroides_distasonis         | Weighted median           | 37 | -0.0769 | 0.1457 | 0.5977 | -0.0316 | 0.0192 | 0.1075 | 33.4885 | 0.5886 | 7.4863     |
| Stroke | s_Parabacteroides_distasonis         | Inverse variance weighted | 37 | -0.1549 | 0.1049 | 0.1399 | -0.0316 | 0.0192 | 0.1075 | 33.4885 | 0.5886 | 7.4863     |
| Stroke | s_Parabacteroides_distasonis         | Simple mode               | 37 | -0.1048 | 0.2870 | 0.7171 | -0.0316 | 0.0192 | 0.1075 | 33.4885 | 0.5886 | 7.4863     |
| Stroke | s_Parabacteroides_distasonis         | Weighted mode             | 37 | -0.0264 | 0.2343 | 0.9110 | -0.0316 | 0.0192 | 0.1075 | 33.4885 | 0.5886 | 7.4863     |
| Stroke | s_Parabacteroides_merdae             | MR Egger                  | 37 | 0.6727  | 0.5608 | 0.2384 | -0.0398 | 0.0335 | 0.2427 | 34.8001 | 0.5256 | 2.3696     |
| Stroke | s_Parabacteroides_merdae             | Weighted median           | 37 | -0.0437 | 0.2761 | 0.8742 | -0.0398 | 0.0335 | 0.2427 | 34.8001 | 0.5256 | 2.3696     |
| Stroke | s_Parabacteroides_merdae             | Inverse variance weighted | 37 | 0.0428  | 0.1833 | 0.8154 | -0.0398 | 0.0335 | 0.2427 | 34.8001 | 0.5256 | 2.3696     |
| Stroke | s_Parabacteroides_merdae             | Simple mode               | 37 | -0.3900 | 0.6315 | 0.5408 | -0.0398 | 0.0335 | 0.2427 | 34.8001 | 0.5256 | 2.3696     |
| Stroke | s_Parabacteroides_merdae             | Weighted mode             | 37 | -0.2646 | 0.5444 | 0.6298 | -0.0398 | 0.0335 | 0.2427 | 34.8001 | 0.5256 | 2.3696     |
| Stroke | s_Parasutterella_excrementihominis   | MR Egger                  | 37 | -0.2880 | 1.0686 | 0.7891 | 0.0055  | 0.0637 | 0.9313 | 43.9685 | 0.1423 | 28850.3308 |
| Stroke | s_Parasutterella_excrementihominis   | Weighted median           | 37 | -0.0540 | 0.4658 | 0.9077 | 0.0055  | 0.0637 | 0.9313 | 43.9685 | 0.1423 | 28850.3308 |
| Stroke | s_Parasutterella_excrementihominis   | Inverse variance weighted | 37 | -0.2003 | 0.3443 | 0.5608 | 0.0055  | 0.0637 | 0.9313 | 43.9685 | 0.1423 | 28850.3308 |
| Stroke | s_Parasutterella_excrementihominis   | Simple mode               | 37 | -0.1746 | 0.9511 | 0.8553 | 0.0055  | 0.0637 | 0.9313 | 43.9685 | 0.1423 | 28850.3308 |
| Stroke | s_Parasutterella_excrementihominis   | Weighted mode             | 37 | -0.4501 | 0.8557 | 0.6021 | 0.0055  | 0.0637 | 0.9313 | 43.9685 | 0.1423 | 28850.3308 |
| Stroke | s_Peptoniphilus_lacrimalis           | MR Egger                  | 37 | 0.5370  | 0.7376 | 0.4714 | -0.0337 | 0.0440 | 0.4483 | 27.8372 | 0.7999 | 8.0154     |
| Stroke | s_Peptoniphilus_lacrimalis           | Weighted median           | 37 | -0.2588 | 0.3407 | 0.4474 | -0.0337 | 0.0440 | 0.4483 | 27.8372 | 0.7999 | 8.0154     |
| Stroke | s_Peptoniphilus_lacrimalis           | Inverse variance weighted | 37 | 0.0025  | 0.2410 | 0.9919 | -0.0337 | 0.0440 | 0.4483 | 27.8372 | 0.7999 | 8.0154     |
| Stroke | s_Peptoniphilus_lacrimalis           | Simple mode               | 37 | 0.2317  | 0.6435 | 0.7209 | -0.0337 | 0.0440 | 0.4483 | 27.8372 | 0.7999 | 8.0154     |
| Stroke | s_Peptoniphilus_lacrimalis           | Weighted mode             | 37 | -0.2705 | 0.5649 | 0.6349 | -0.0337 | 0.0440 | 0.4483 | 27.8372 | 0.7999 | 8.0154     |
| Stroke | s_Peptostreptococcus_anaerobius      | MR Egger                  | 37 | 0.9026  | 0.5390 | 0.1029 | -0.0437 | 0.0322 | 0.1827 | 38.8602 | 0.3421 | 11.8001    |
| Stroke | s_Peptostreptococcus_anaerobius      | Weighted median           | 37 | 0.0552  | 0.2490 | 0.8244 | -0.0437 | 0.0322 | 0.1827 | 38.8602 | 0.3421 | 11.8001    |
| Stroke | s_Peptostreptococcus_anaerobius      | Inverse variance weighted | 37 | 0.2101  | 0.1782 | 0.2385 | -0.0437 | 0.0322 | 0.1827 | 38.8602 | 0.3421 | 11.8001    |
| Stroke | s_Peptostreptococcus_anaerobius      | Simple mode               | 37 | 0.1320  | 0.5387 | 0.8079 | -0.0437 | 0.0322 | 0.1827 | 38.8602 | 0.3421 | 11.8001    |
| Stroke | s_Peptostreptococcus_anaerobius      | Weighted mode             | 37 | -0.0701 | 0.5035 | 0.8901 | -0.0437 | 0.0322 | 0.1827 | 38.8602 | 0.3421 | 11.8001    |
| Stroke | s_Peptostreptococcus_stomatitis      | MR Egger                  | 37 | -0.5523 | 0.7244 | 0.4509 | 0.0399  | 0.0432 | 0.3627 | 39.1308 | 0.2896 | 78.9823    |
| Stroke | s_Peptostreptococcus_stomatitis      | Weighted median           | 37 | 0.1821  | 0.3342 | 0.5859 | 0.0399  | 0.0432 | 0.3627 | 39.1308 | 0.2896 | 78.9823    |
| Stroke | s_Peptostreptococcus_stomatitis      | Inverse variance weighted | 37 | 0.0791  | 0.2363 | 0.7378 | 0.0399  | 0.0432 | 0.3627 | 39.1308 | 0.2896 | 78.9823    |
| Stroke | s_Peptostreptococcus_stomatitis      | Simple mode               | 37 | 0.2679  | 0.6947 | 0.7021 | 0.0399  | 0.0432 | 0.3627 | 39.1308 | 0.2896 | 78.9823    |
| Stroke | s_Peptostreptococcus_stomatitis      | Weighted mode             | 37 | 0.3117  | 0.7981 | 0.6984 | 0.0399  | 0.0432 | 0.3627 | 39.1308 | 0.2896 | 78.9823    |
| Stroke | s_Phascalartobacterium_succinatutens | MR Egger                  | 37 | 0.2560  | 0.6392 | 0.6912 | -0.0136 | 0.0381 | 0.7244 | 23.7361 | 0.9256 | 1.4374     |
| Stroke | s_Phascalartobacterium_succinatutens | Weighted median           | 37 | -0.0580 | 0.2907 | 0.8420 | -0.0136 | 0.0381 | 0.7244 | 23.7361 | 0.9256 | 1.4374     |
| Stroke | s_Phascalartobacterium_succinatutens | Inverse variance weighted | 37 | 0.0413  | 0.2089 | 0.8433 | -0.0136 | 0.0381 | 0.7244 | 23.7361 | 0.9256 | 1.4374     |
| Stroke | s_Phascalartobacterium_succinatutens | Simple mode               | 37 | -0.2477 | 0.5678 | 0.6653 | -0.0136 | 0.0381 | 0.7244 | 23.7361 | 0.9256 | 1.4374     |
| Stroke | s_Phascalartobacterium_succinatutens | Weighted mode             | 37 | -0.1617 | 0.4912 | 0.7440 | -0.0136 | 0.0381 | 0.7244 | 23.7361 | 0.9256 | 1.4374     |
| Stroke | s_Porphyromonas_asaccharolytica      | MR Egger                  | 37 | 0.6896  | 0.6019 | 0.2596 | -0.0417 | 0.0359 | 0.2532 | 42.1869 | 0.2210 | 1.6713     |
| Stroke | s_Porphyromonas_asaccharolytica      | Weighted median           | 37 | 0.2297  | 0.2629 | 0.3822 | -0.0417 | 0.0359 | 0.2532 | 42.1869 | 0.2210 | 1.6713     |
| Stroke | s_Porphyromonas_asaccharolytica      | Inverse variance weighted | 37 | 0.0288  | 0.1976 | 0.8841 | -0.0417 | 0.0359 | 0.2532 | 42.1869 | 0.2210 | 1.6713     |
| Stroke | s_Porphyromonas_asaccharolytica      | Simple mode               | 37 | 0.6872  | 0.6324 | 0.2845 | -0.0417 | 0.0359 | 0.2532 | 42.1869 | 0.2210 | 1.6713     |
| Stroke | s_Porphyromonas_asaccharolytica      | Weighted mode             | 37 | 0.1526  | 0.4533 | 0.7384 | -0.0417 | 0.0359 | 0.2532 | 42.1869 | 0.2210 | 1.6713     |
| Stroke | s_Prevotella_bergensis               | MR Egger                  | 37 | 0.4504  | 1.1155 | 0.6889 | -0.0491 | 0.0665 | 0.4651 | 39.8431 | 0.2634 | 130.5091   |
| Stroke | s_Prevotella_bergensis               | Weighted median           | 37 | -0.1703 | 0.5243 | 0.7453 | -0.0491 | 0.0665 | 0.4651 | 39.8431 | 0.2634 | 130.5091   |
| Stroke | s_Prevotella_bergensis               | Inverse variance weighted | 37 | -0.3283 | 0.3621 | 0.3647 | -0.0491 | 0.0665 | 0.4651 | 39.8431 | 0.2634 | 130.5091   |
| Stroke | s_Prevotella_bergensis               | Simple mode               | 37 | 1.6250  | 1.1939 | 0.1819 | -0.0491 | 0.0665 | 0.4651 | 39.8431 | 0.2634 | 130.5091   |
| Stroke | s_Prevotella_bergensis               | Weighted mode             | 37 | -0.7635 | 0.9674 | 0.4351 | -0.0491 | 0.0665 | 0.4651 | 39.8431 | 0.2634 | 130.5091   |
| Stroke | s_Prevotella_bivia                   | MR Egger                  | 37 | -0.1351 | 0.8387 | 0.8729 | -0.0116 | 0.0500 | 0.8182 | 40.6612 | 0.2351 | 129.9463   |
| Stroke | s_Prevotella_bivia                   | Weighted median           | 37 | -0.1020 | 0.3911 | 0.7942 | -0.0116 | 0.0500 | 0.8182 | 40.6612 | 0.2351 | 129.9463   |
| Stroke | s_Prevotella_bivia                   | Inverse variance weighted | 37 | -0.3187 | 0.2704 | 0.2387 | -0.0116 | 0.0500 | 0.8182 | 40.6612 | 0.2351 | 129.9463   |
| Stroke | s_Prevotella_bivia                   | Simple mode               | 37 | 0.1675  | 0.8647 | 0.8475 | -0.0116 | 0.0500 | 0.8182 | 40.6612 | 0.2351 | 129.9463   |
| Stroke | s_Prevotella_bivia                   | Weighted mode             | 37 | 0.1675  | 0.7472 | 0.8239 | -0.0116 | 0.0500 | 0.8182 | 40.6612 | 0.2351 | 129.9463   |
| Stroke | s_Prevotella_buccae                  | MR Egger                  | 37 | -0.0805 | 0.7241 | 0.9121 | -0.0062 | 0.0432 | 0.8863 | 25.4266 | 0.8825 | 3.7670     |
| Stroke | s_Prevotella_buccae                  | Weighted median           | 37 | -0.3444 | 0.3382 | 0.3085 | -0.0062 | 0.0432 | 0.8863 | 25.4266 | 0.8825 | 3.7670     |
| Stroke | s_Prevotella_buccae                  | Inverse variance weighted | 37 | -0.1790 | 0.2366 | 0.4493 | -0.0062 | 0.0432 | 0.8863 | 25.4266 | 0.8825 | 3.7670     |
| Stroke | s_Prevotella_buccae                  | Simple mode               | 37 | -0.5722 | 0.6441 | 0.3802 | -0.0062 | 0.0432 | 0.8863 | 25.4266 | 0.8825 | 3.7670     |
| Stroke | s_Prevotella_buccae                  | Weighted mode             | 37 | -0.5909 | 0.6212 | 0.3478 | -0.0062 | 0.0432 | 0.8863 | 25.4266 | 0.8825 | 3.7670     |
| Stroke | s_Prevotella_buccalis                | MR Egger                  | 37 | 0.0560  | 0.6475 | 0.9315 | -0.0245 | 0.0386 | 0.5302 | 41.1888 | 0.2180 | 1.0442     |
| Stroke | s_Prevotella_buccalis                | Weighted median           | 37 | -0.4687 | 0.2830 | 0.0976 | -0.0245 | 0.0386 | 0.5302 | 41.1888 | 0.2180 | 1.0442     |
| Stroke | s_Prevotella_buccalis                | Inverse variance weighted | 37 | -0.3319 | 0.2098 | 0.1136 | -0.0245 | 0.0386 | 0.5302 | 41.1888 | 0.2180 | 1.0442     |
| Stroke | s_Prevotella_buccalis                | Simple mode               | 37 | -0.1905 | 0.5345 | 0.7236 | -0.0245 | 0.0386 | 0.5302 | 41.1888 | 0.2180 | 1.0442     |
| Stroke | s_Prevotella_buccalis                | Weighted mode             | 37 | -0.3531 | 0.4815 | 0.4680 | -0.0245 | 0.0386 | 0.5302 | 41.1888 | 0.2180 | 1.0442     |
| Stroke | s_Prevotella_copri                   | MR Egger                  | 37 | 0.4216  | 1.2508 | 0.7381 | -0.0127 | 0.0746 | 0.8661 | 30.2210 | 0.6980 | 387.9350   |

|        |                                   |                           |    |         |        |        |         |        |        |         |        |          |
|--------|-----------------------------------|---------------------------|----|---------|--------|--------|---------|--------|--------|---------|--------|----------|
| Stroke | s_Prevotella_copri                | Weighted median           | 37 | 0.4312  | 0.6046 | 0.4757 | -0.0127 | 0.0746 | 0.8661 | 30.2210 | 0.6980 | 387.9350 |
| Stroke | s_Prevotella_copri                | Inverse variance weighted | 37 | 0.2209  | 0.4087 | 0.5889 | -0.0127 | 0.0746 | 0.8661 | 30.2210 | 0.6980 | 387.9350 |
| Stroke | s_Prevotella_copri                | Simple mode               | 37 | 0.1645  | 1.2542 | 0.8964 | -0.0127 | 0.0746 | 0.8661 | 30.2210 | 0.6980 | 387.9350 |
| Stroke | s_Prevotella_copri                | Weighted mode             | 37 | 0.2964  | 1.0707 | 0.7835 | -0.0127 | 0.0746 | 0.8661 | 30.2210 | 0.6980 | 387.9350 |
| Stroke | s_Prevotella_denticola            | MR Egger                  | 37 | -0.3969 | 1.1473 | 0.7315 | -0.0005 | 0.0684 | 0.9942 | 36.2970 | 0.4080 | 999.0083 |
| Stroke | s_Prevotella_denticola            | Weighted median           | 37 | -0.3392 | 0.5550 | 0.5411 | -0.0005 | 0.0684 | 0.9942 | 36.2970 | 0.4080 | 999.0083 |
| Stroke | s_Prevotella_denticola            | Inverse variance weighted | 37 | -0.4048 | 0.3696 | 0.2735 | -0.0005 | 0.0684 | 0.9942 | 36.2970 | 0.4080 | 999.0083 |
| Stroke | s_Prevotella_denticola            | Simple mode               | 37 | 1.5568  | 1.1509 | 0.1846 | -0.0005 | 0.0684 | 0.9942 | 36.2970 | 0.4080 | 999.0083 |
| Stroke | s_Prevotella_denticola            | Weighted mode             | 37 | -0.7925 | 0.8923 | 0.3803 | -0.0005 | 0.0684 | 0.9942 | 36.2970 | 0.4080 | 999.0083 |
| Stroke | s_Prevotella_disiens              | MR Egger                  | 37 | -0.2647 | 0.4522 | 0.5620 | 0.0086  | 0.0270 | 0.7519 | 48.0353 | 0.0700 | 4.4161   |
| Stroke | s_Prevotella_disiens              | Weighted median           | 37 | 0.0716  | 0.1929 | 0.7106 | 0.0086  | 0.0270 | 0.7519 | 48.0353 | 0.0700 | 4.4161   |
| Stroke | s_Prevotella_disiens              | Inverse variance weighted | 37 | -0.1286 | 0.1459 | 0.3782 | 0.0086  | 0.0270 | 0.7519 | 48.0353 | 0.0700 | 4.4161   |
| Stroke | s_Prevotella_disiens              | Simple mode               | 37 | 0.1644  | 0.3646 | 0.6547 | 0.0086  | 0.0270 | 0.7519 | 48.0353 | 0.0700 | 4.4161   |
| Stroke | s_Prevotella_disiens              | Weighted mode             | 37 | 0.1758  | 0.3307 | 0.5984 | 0.0086  | 0.0270 | 0.7519 | 48.0353 | 0.0700 | 4.4161   |
| Stroke | s_Prevotella_oris                 | MR Egger                  | 37 | 0.1311  | 0.4406 | 0.7678 | -0.0252 | 0.0263 | 0.3439 | 53.0342 | 0.0334 | 1.1090   |
| Stroke | s_Prevotella_oris                 | Weighted median           | 37 | -0.4042 | 0.1879 | 0.0315 | -0.0252 | 0.0263 | 0.3439 | 53.0342 | 0.0334 | 1.1090   |
| Stroke | s_Prevotella_oris                 | Inverse variance weighted | 37 | -0.2684 | 0.1438 | 0.0621 | -0.0252 | 0.0263 | 0.3439 | 53.0342 | 0.0334 | 1.1090   |
| Stroke | s_Prevotella_oris                 | Simple mode               | 37 | -0.7319 | 0.4274 | 0.0954 | -0.0252 | 0.0263 | 0.3439 | 53.0342 | 0.0334 | 1.1090   |
| Stroke | s_Prevotella_oris                 | Weighted mode             | 37 | -0.7051 | 0.4271 | 0.1075 | -0.0252 | 0.0263 | 0.3439 | 53.0342 | 0.0334 | 1.1090   |
| Stroke | s_Prevotella_tanneriae            | MR Egger                  | 37 | -0.6374 | 0.6280 | 0.3171 | 0.0296  | 0.0375 | 0.4344 | 43.6510 | 0.1497 | 1.1101   |
| Stroke | s_Prevotella_tanneriae            | Weighted median           | 37 | -0.2939 | 0.2754 | 0.2860 | 0.0296  | 0.0375 | 0.4344 | 43.6510 | 0.1497 | 1.1101   |
| Stroke | s_Prevotella_tanneriae            | Inverse variance weighted | 37 | -0.1680 | 0.2041 | 0.4104 | 0.0296  | 0.0375 | 0.4344 | 43.6510 | 0.1497 | 1.1101   |
| Stroke | s_Prevotella_tanneriae            | Simple mode               | 37 | -0.6041 | 0.5532 | 0.2821 | 0.0296  | 0.0375 | 0.4344 | 43.6510 | 0.1497 | 1.1101   |
| Stroke | s_Prevotella_tanneriae            | Weighted mode             | 37 | -0.4982 | 0.4594 | 0.2854 | 0.0296  | 0.0375 | 0.4344 | 43.6510 | 0.1497 | 1.1101   |
| Stroke | s_Prevotella_timonensis           | MR Egger                  | 37 | 0.6585  | 0.4281 | 0.1330 | -0.0415 | 0.0255 | 0.1135 | 35.6306 | 0.4860 | 1.0017   |
| Stroke | s_Prevotella_timonensis           | Weighted median           | 37 | 0.0356  | 0.2080 | 0.8641 | -0.0415 | 0.0255 | 0.1135 | 35.6306 | 0.4860 | 1.0017   |
| Stroke | s_Prevotella_timonensis           | Inverse variance weighted | 37 | 0.0018  | 0.1399 | 0.9899 | -0.0415 | 0.0255 | 0.1135 | 35.6306 | 0.4860 | 1.0017   |
| Stroke | s_Prevotella_timonensis           | Simple mode               | 37 | 0.1894  | 0.4321 | 0.6638 | -0.0415 | 0.0255 | 0.1135 | 35.6306 | 0.4860 | 1.0017   |
| Stroke | s_Prevotella_timonensis           | Weighted mode             | 37 | 0.3457  | 0.3818 | 0.3713 | -0.0415 | 0.0255 | 0.1135 | 35.6306 | 0.4860 | 1.0017   |
| Stroke | s_Providencia_rettgeri            | MR Egger                  | 37 | -0.6394 | 0.8325 | 0.4477 | 0.0360  | 0.0497 | 0.4737 | 57.1122 | 0.0105 | 9.5498   |
| Stroke | s_Providencia_rettgeri            | Weighted median           | 37 | 0.2472  | 0.3195 | 0.4392 | 0.0360  | 0.0497 | 0.4737 | 57.1122 | 0.0105 | 9.5498   |
| Stroke | s_Providencia_rettgeri            | Inverse variance weighted | 37 | -0.0694 | 0.2704 | 0.7973 | 0.0360  | 0.0497 | 0.4737 | 57.1122 | 0.0105 | 9.5498   |
| Stroke | s_Providencia_rettgeri            | Simple mode               | 37 | 0.6665  | 0.7167 | 0.3586 | 0.0360  | 0.0497 | 0.4737 | 57.1122 | 0.0105 | 9.5498   |
| Stroke | s_Providencia_rettgeri            | Weighted mode             | 37 | 0.5252  | 0.6451 | 0.4209 | 0.0360  | 0.0497 | 0.4737 | 57.1122 | 0.0105 | 9.5498   |
| Stroke | s_Pseudoflavonifractor_capillosus | MR Egger                  | 37 | 0.0912  | 0.3000 | 0.7629 | -0.0033 | 0.0179 | 0.8544 | 23.9877 | 0.9200 | 10.9770  |
| Stroke | s_Pseudoflavonifractor_capillosus | Weighted median           | 37 | 0.0701  | 0.1350 | 0.6035 | -0.0033 | 0.0179 | 0.8544 | 23.9877 | 0.9200 | 10.9770  |
| Stroke | s_Pseudoflavonifractor_capillosus | Inverse variance weighted | 37 | 0.0388  | 0.0980 | 0.6924 | -0.0033 | 0.0179 | 0.8544 | 23.9877 | 0.9200 | 10.9770  |
| Stroke | s_Pseudoflavonifractor_capillosus | Simple mode               | 37 | 0.1024  | 0.2650 | 0.7016 | -0.0033 | 0.0179 | 0.8544 | 23.9877 | 0.9200 | 10.9770  |
| Stroke | s_Pseudoflavonifractor_capillosus | Weighted mode             | 37 | 0.0470  | 0.2204 | 0.8325 | -0.0033 | 0.0179 | 0.8544 | 23.9877 | 0.9200 | 10.9770  |
| Stroke | s_Roseburia_intestinalis          | MR Egger                  | 37 | 0.7591  | 0.5226 | 0.1552 | -0.0248 | 0.0312 | 0.4310 | 34.0695 | 0.5129 | 1.1633   |
| Stroke | s_Roseburia_intestinalis          | Weighted median           | 37 | 0.1593  | 0.2479 | 0.5205 | -0.0248 | 0.0312 | 0.4310 | 34.0695 | 0.5129 | 1.1633   |
| Stroke | s_Roseburia_intestinalis          | Inverse variance weighted | 37 | 0.3657  | 0.1708 | 0.0323 | -0.0248 | 0.0312 | 0.4310 | 34.0695 | 0.5129 | 1.1633   |
| Stroke | s_Roseburia_intestinalis          | Simple mode               | 37 | 0.0831  | 0.5182 | 0.8734 | -0.0248 | 0.0312 | 0.4310 | 34.0695 | 0.5129 | 1.1633   |
| Stroke | s_Roseburia_intestinalis          | Weighted mode             | 37 | 0.0393  | 0.4148 | 0.9251 | -0.0248 | 0.0312 | 0.4310 | 34.0695 | 0.5129 | 1.1633   |
| Stroke | s_Ruminococcus_albus              | MR Egger                  | 37 | 0.7035  | 0.7431 | 0.3502 | -0.0245 | 0.0443 | 0.5837 | 38.2710 | 0.3233 | 11.8132  |
| Stroke | s_Ruminococcus_albus              | Weighted median           | 37 | 0.5556  | 0.3481 | 0.1105 | -0.0245 | 0.0443 | 0.5837 | 38.2710 | 0.3233 | 11.8132  |
| Stroke | s_Ruminococcus_albus              | Inverse variance weighted | 37 | 0.3151  | 0.2405 | 0.1900 | -0.0245 | 0.0443 | 0.5837 | 38.2710 | 0.3233 | 11.8132  |
| Stroke | s_Ruminococcus_albus              | Simple mode               | 37 | 0.8185  | 0.6509 | 0.2167 | -0.0245 | 0.0443 | 0.5837 | 38.2710 | 0.3233 | 11.8132  |
| Stroke | s_Ruminococcus_albus              | Weighted mode             | 37 | 0.7549  | 0.5583 | 0.1847 | -0.0245 | 0.0443 | 0.5837 | 38.2710 | 0.3233 | 11.8132  |
| Stroke | s_Ruminococcus_bromii             | MR Egger                  | 37 | 0.3559  | 0.8097 | 0.6630 | 0.0154  | 0.0483 | 0.7516 | 35.6686 | 0.4368 | 12.4870  |
| Stroke | s_Ruminococcus_bromii             | Weighted median           | 37 | 0.4563  | 0.3923 | 0.2448 | 0.0154  | 0.0483 | 0.7516 | 35.6686 | 0.4368 | 12.4870  |
| Stroke | s_Ruminococcus_bromii             | Inverse variance weighted | 37 | 0.6000  | 0.2620 | 0.0220 | 0.0154  | 0.0483 | 0.7516 | 35.6686 | 0.4368 | 12.4870  |
| Stroke | s_Ruminococcus_bromii             | Simple mode               | 37 | 0.4655  | 0.7716 | 0.5501 | 0.0154  | 0.0483 | 0.7516 | 35.6686 | 0.4368 | 12.4870  |
| Stroke | s_Ruminococcus_bromii             | Weighted mode             | 37 | 0.4228  | 0.6637 | 0.5282 | 0.0154  | 0.0483 | 0.7516 | 35.6686 | 0.4368 | 12.4870  |
| Stroke | s_Ruminococcus_champanellensis    | MR Egger                  | 37 | 1.1775  | 0.7471 | 0.1240 | -0.0524 | 0.0446 | 0.2473 | 24.8170 | 0.9200 | 9.9258   |
| Stroke | s_Ruminococcus_champanellensis    | Weighted median           | 37 | 0.5210  | 0.3393 | 0.1247 | -0.0524 | 0.0446 | 0.2473 | 24.8170 | 0.9200 | 9.9258   |
| Stroke | s_Ruminococcus_champanellensis    | Inverse variance weighted | 37 | 0.3468  | 0.2441 | 0.1555 | -0.0524 | 0.0446 | 0.2473 | 24.8170 | 0.9200 | 9.9258   |
| Stroke | s_Ruminococcus_champanellensis    | Simple mode               | 37 | 0.4480  | 0.6855 | 0.5176 | -0.0524 | 0.0446 | 0.2473 | 24.8170 | 0.9200 | 9.9258   |
| Stroke | s_Ruminococcus_champanellensis    | Weighted mode             | 37 | 0.5821  | 0.5767 | 0.3196 | -0.0524 | 0.0446 | 0.2473 | 24.8170 | 0.9200 | 9.9258   |
| Stroke | s_Ruminococcus_gnavus             | MR Egger                  | 37 | -0.5370 | 0.4740 | 0.2650 | 0.0244  | 0.0283 | 0.3949 | 22.9061 | 0.9423 | NA       |
| Stroke | s_Ruminococcus_gnavus             | Weighted median           | 37 | -0.0430 | 0.2138 | 0.8407 | 0.0244  | 0.0283 | 0.3949 | 22.9061 | 0.9423 | NA       |

|        |                              |                           |    |         |        |        |         |        |        |         |        |    |           |
|--------|------------------------------|---------------------------|----|---------|--------|--------|---------|--------|--------|---------|--------|----|-----------|
| Stroke | s_Ruminococcus_gnavus        | Inverse variance weighted | 37 | -0.1512 | 0.1549 | 0.3292 | 0.0244  | 0.0283 | 0.3949 | 22.9061 | 0.9423 | NA |           |
| Stroke | s_Ruminococcus_gnavus        | Simple mode               | 37 | 0.3989  | 0.4423 | 0.3731 | 0.0244  | 0.0283 | 0.3949 | 22.9061 | 0.9423 | NA |           |
| Stroke | s_Ruminococcus_gnavus        | Weighted mode             | 37 | 0.3243  | 0.4461 | 0.4720 | 0.0244  | 0.0283 | 0.3949 | 22.9061 | 0.9423 | NA |           |
| Stroke | s_Ruminococcus_lactaris      | MR Egger                  | 37 | 0.1998  | 0.4643 | 0.6697 | 0.0055  | 0.0277 | 0.8436 | 33.4940 | 0.5408 |    | 2.9156    |
| Stroke | s_Ruminococcus_lactaris      | Weighted median           | 37 | 0.1205  | 0.2241 | 0.5908 | 0.0055  | 0.0277 | 0.8436 | 33.4940 | 0.5408 |    | 2.9156    |
| Stroke | s_Ruminococcus_lactaris      | Inverse variance weighted | 37 | 0.2870  | 0.1517 | 0.0585 | 0.0055  | 0.0277 | 0.8436 | 33.4940 | 0.5408 |    | 2.9156    |
| Stroke | s_Ruminococcus_lactaris      | Simple mode               | 37 | 0.0853  | 0.4691 | 0.8568 | 0.0055  | 0.0277 | 0.8436 | 33.4940 | 0.5408 |    | 2.9156    |
| Stroke | s_Ruminococcus_lactaris      | Weighted mode             | 37 | -0.0149 | 0.4220 | 0.9720 | 0.0055  | 0.0277 | 0.8436 | 33.4940 | 0.5408 |    | 2.9156    |
| Stroke | s_Ruminococcus_obeum         | MR Egger                  | 37 | 0.2422  | 0.2750 | 0.3843 | -0.0086 | 0.0164 | 0.6044 | 37.5782 | 0.3519 | NA |           |
| Stroke | s_Ruminococcus_obeum         | Weighted median           | 37 | 0.0284  | 0.1313 | 0.8290 | -0.0086 | 0.0164 | 0.6044 | 37.5782 | 0.3519 | NA |           |
| Stroke | s_Ruminococcus_obeum         | Inverse variance weighted | 37 | 0.1064  | 0.0889 | 0.2316 | -0.0086 | 0.0164 | 0.6044 | 37.5782 | 0.3519 | NA |           |
| Stroke | s_Ruminococcus_obeum         | Simple mode               | 37 | -0.0644 | 0.2526 | 0.8003 | -0.0086 | 0.0164 | 0.6044 | 37.5782 | 0.3519 | NA |           |
| Stroke | s_Ruminococcus_obeum         | Weighted mode             | 37 | -0.0336 | 0.2361 | 0.8875 | -0.0086 | 0.0164 | 0.6044 | 37.5782 | 0.3519 | NA |           |
| Stroke | s_Ruminococcus_torques       | MR Egger                  | 37 | 0.2712  | 0.3162 | 0.3969 | -0.0017 | 0.0189 | 0.9288 | 29.9760 | 0.7092 | NA |           |
| Stroke | s_Ruminococcus_torques       | Weighted median           | 37 | 0.2143  | 0.1532 | 0.1619 | -0.0017 | 0.0189 | 0.9288 | 29.9760 | 0.7092 | NA |           |
| Stroke | s_Ruminococcus_torques       | Inverse variance weighted | 37 | 0.2443  | 0.1033 | 0.0181 | -0.0017 | 0.0189 | 0.9288 | 29.9760 | 0.7092 | NA |           |
| Stroke | s_Ruminococcus_torques       | Simple mode               | 37 | 0.5057  | 0.3064 | 0.1075 | -0.0017 | 0.0189 | 0.9288 | 29.9760 | 0.7092 | NA |           |
| Stroke | s_Ruminococcus_torques       | Weighted mode             | 37 | 0.4884  | 0.3057 | 0.1189 | -0.0017 | 0.0189 | 0.9288 | 29.9760 | 0.7092 | NA |           |
| Stroke | s_Salmonella_enterica        | MR Egger                  | 37 | -0.7944 | 0.7740 | 0.3118 | 0.0576  | 0.0462 | 0.2202 | 50.9872 | 0.0501 |    | 8.6704    |
| Stroke | s_Salmonella_enterica        | Weighted median           | 37 | 0.4015  | 0.3143 | 0.2015 | 0.0576  | 0.0462 | 0.2202 | 50.9872 | 0.0501 |    | 8.6704    |
| Stroke | s_Salmonella_enterica        | Inverse variance weighted | 37 | 0.1187  | 0.2550 | 0.6415 | 0.0576  | 0.0462 | 0.2202 | 50.9872 | 0.0501 |    | 8.6704    |
| Stroke | s_Salmonella_enterica        | Simple mode               | 37 | 0.8452  | 0.6273 | 0.1863 | 0.0576  | 0.0462 | 0.2202 | 50.9872 | 0.0501 |    | 8.6704    |
| Stroke | s_Salmonella_enterica        | Weighted mode             | 37 | 0.6801  | 0.6335 | 0.2902 | 0.0576  | 0.0462 | 0.2202 | 50.9872 | 0.0501 |    | 8.6704    |
| Stroke | s_Streptococcus_anginosus    | MR Egger                  | 37 | -0.5281 | 0.5547 | 0.3476 | 0.0228  | 0.0331 | 0.4963 | 27.5510 | 0.8110 |    | 2.6006    |
| Stroke | s_Streptococcus_anginosus    | Weighted median           | 37 | -0.2550 | 0.2587 | 0.3243 | 0.0228  | 0.0331 | 0.4963 | 27.5510 | 0.8110 |    | 2.6006    |
| Stroke | s_Streptococcus_anginosus    | Inverse variance weighted | 37 | -0.1677 | 0.1813 | 0.3550 | 0.0228  | 0.0331 | 0.4963 | 27.5510 | 0.8110 |    | 2.6006    |
| Stroke | s_Streptococcus_anginosus    | Simple mode               | 37 | 0.0498  | 0.5423 | 0.9273 | 0.0228  | 0.0331 | 0.4963 | 27.5510 | 0.8110 |    | 2.6006    |
| Stroke | s_Streptococcus_anginosus    | Weighted mode             | 37 | -0.0110 | 0.5032 | 0.9828 | 0.0228  | 0.0331 | 0.4963 | 27.5510 | 0.8110 |    | 2.6006    |
| Stroke | s_Streptococcus_australis    | MR Egger                  | 37 | -0.7056 | 0.4698 | 0.1421 | 0.0376  | 0.0280 | 0.1884 | 19.9861 | 0.9858 |    | 1.9858    |
| Stroke | s_Streptococcus_australis    | Weighted median           | 37 | -0.1666 | 0.2097 | 0.4269 | 0.0376  | 0.0280 | 0.1884 | 19.9861 | 0.9858 |    | 1.9858    |
| Stroke | s_Streptococcus_australis    | Inverse variance weighted | 37 | -0.1101 | 0.1535 | 0.4734 | 0.0376  | 0.0280 | 0.1884 | 19.9861 | 0.9858 |    | 1.9858    |
| Stroke | s_Streptococcus_australis    | Simple mode               | 37 | -0.1636 | 0.4196 | 0.6990 | 0.0376  | 0.0280 | 0.1884 | 19.9861 | 0.9858 |    | 1.9858    |
| Stroke | s_Streptococcus_australis    | Weighted mode             | 37 | -0.2038 | 0.3897 | 0.6043 | 0.0376  | 0.0280 | 0.1884 | 19.9861 | 0.9858 |    | 1.9858    |
| Stroke | s_Streptococcus_dysgalactiae | MR Egger                  | 37 | 0.0909  | 0.3725 | 0.8087 | -0.0050 | 0.0222 | 0.8236 | 54.1714 | 0.0203 |    | 2.5217    |
| Stroke | s_Streptococcus_dysgalactiae | Weighted median           | 37 | -0.0901 | 0.1410 | 0.5228 | -0.0050 | 0.0222 | 0.8236 | 54.1714 | 0.0203 |    | 2.5217    |
| Stroke | s_Streptococcus_dysgalactiae | Inverse variance weighted | 37 | 0.0118  | 0.1201 | 0.9216 | -0.0050 | 0.0222 | 0.8236 | 54.1714 | 0.0203 |    | 2.5217    |
| Stroke | s_Streptococcus_dysgalactiae | Simple mode               | 37 | -0.0665 | 0.2737 | 0.8094 | -0.0050 | 0.0222 | 0.8236 | 54.1714 | 0.0203 |    | 2.5217    |
| Stroke | s_Streptococcus_dysgalactiae | Weighted mode             | 37 | -0.0769 | 0.2588 | 0.7682 | -0.0050 | 0.0222 | 0.8236 | 54.1714 | 0.0203 |    | 2.5217    |
| Stroke | s_Streptococcus_gallolyticus | MR Egger                  | 37 | -0.2212 | 0.5531 | 0.6917 | 0.0239  | 0.0330 | 0.4742 | 33.2522 | 0.5527 |    | -280.5590 |
| Stroke | s_Streptococcus_gallolyticus | Weighted median           | 37 | 0.1139  | 0.2576 | 0.6584 | 0.0239  | 0.0330 | 0.4742 | 33.2522 | 0.5527 |    | -280.5590 |
| Stroke | s_Streptococcus_gallolyticus | Inverse variance weighted | 37 | 0.1570  | 0.1808 | 0.3852 | 0.0239  | 0.0330 | 0.4742 | 33.2522 | 0.5527 |    | -280.5590 |
| Stroke | s_Streptococcus_gallolyticus | Simple mode               | 37 | 0.4529  | 0.5535 | 0.4186 | 0.0239  | 0.0330 | 0.4742 | 33.2522 | 0.5527 |    | -280.5590 |
| Stroke | s_Streptococcus_gallolyticus | Weighted mode             | 37 | 0.5291  | 0.5113 | 0.3077 | 0.0239  | 0.0330 | 0.4742 | 33.2522 | 0.5527 |    | -280.5590 |
| Stroke | s_Streptococcus_gordonii     | MR Egger                  | 37 | -0.6106 | 0.4766 | 0.2085 | 0.0214  | 0.0284 | 0.4575 | 23.2399 | 0.9359 |    | 1.3082    |
| Stroke | s_Streptococcus_gordonii     | Weighted median           | 37 | -0.3147 | 0.2130 | 0.1395 | 0.0214  | 0.0284 | 0.4575 | 23.2399 | 0.9359 |    | 1.3082    |
| Stroke | s_Streptococcus_gordonii     | Inverse variance weighted | 37 | -0.2722 | 0.1558 | 0.0805 | 0.0214  | 0.0284 | 0.4575 | 23.2399 | 0.9359 |    | 1.3082    |
| Stroke | s_Streptococcus_gordonii     | Simple mode               | 37 | 0.2548  | 0.4583 | 0.5817 | 0.0214  | 0.0284 | 0.4575 | 23.2399 | 0.9359 |    | 1.3082    |
| Stroke | s_Streptococcus_gordonii     | Weighted mode             | 37 | -0.7535 | 0.4337 | 0.0908 | 0.0214  | 0.0284 | 0.4575 | 23.2399 | 0.9359 |    | 1.3082    |
| Stroke | s_Streptococcus_infantarius  | MR Egger                  | 37 | 0.0169  | 0.7221 | 0.9814 | 0.0054  | 0.0431 | 0.9009 | 25.9719 | 0.8659 |    | 621.9304  |
| Stroke | s_Streptococcus_infantarius  | Weighted median           | 37 | -0.2383 | 0.3290 | 0.4687 | 0.0054  | 0.0431 | 0.9009 | 25.9719 | 0.8659 |    | 621.9304  |
| Stroke | s_Streptococcus_infantarius  | Inverse variance weighted | 37 | 0.1025  | 0.2360 | 0.6639 | 0.0054  | 0.0431 | 0.9009 | 25.9719 | 0.8659 |    | 621.9304  |
| Stroke | s_Streptococcus_infantarius  | Simple mode               | 37 | -0.4326 | 0.6480 | 0.5086 | 0.0054  | 0.0431 | 0.9009 | 25.9719 | 0.8659 |    | 621.9304  |
| Stroke | s_Streptococcus_infantarius  | Weighted mode             | 37 | -0.4326 | 0.5427 | 0.4306 | 0.0054  | 0.0431 | 0.9009 | 25.9719 | 0.8659 |    | 621.9304  |
| Stroke | s_Streptococcus_infantis     | MR Egger                  | 37 | -0.5841 | 0.3937 | 0.1468 | 0.0333  | 0.0235 | 0.1646 | 27.1170 | 0.8571 |    | 3.4565    |
| Stroke | s_Streptococcus_infantis     | Weighted median           | 37 | -0.1929 | 0.1813 | 0.2875 | 0.0333  | 0.0235 | 0.1646 | 27.1170 | 0.8571 |    | 3.4565    |
| Stroke | s_Streptococcus_infantis     | Inverse variance weighted | 37 | -0.0560 | 0.1287 | 0.6634 | 0.0333  | 0.0235 | 0.1646 | 27.1170 | 0.8571 |    | 3.4565    |
| Stroke | s_Streptococcus_infantis     | Simple mode               | 37 | -0.2851 | 0.3471 | 0.4168 | 0.0333  | 0.0235 | 0.1646 | 27.1170 | 0.8571 |    | 3.4565    |
| Stroke | s_Streptococcus_infantis     | Weighted mode             | 37 | -0.3774 | 0.3344 | 0.2665 | 0.0333  | 0.0235 | 0.1646 | 27.1170 | 0.8571 |    | 3.4565    |
| Stroke | s_Streptococcus_mitis        | MR Egger                  | 37 | -0.3372 | 0.4019 | 0.4072 | 0.0167  | 0.0240 | 0.4911 | 24.3480 | 0.9114 |    | 1.0911    |
| Stroke | s_Streptococcus_mitis        | Weighted median           | 37 | -0.2031 | 0.1835 | 0.2684 | 0.0167  | 0.0240 | 0.4911 | 24.3480 | 0.9114 |    | 1.0911    |
| Stroke | s_Streptococcus_mitis        | Inverse variance weighted | 37 | -0.0729 | 0.1314 | 0.5789 | 0.0167  | 0.0240 | 0.4911 | 24.3480 | 0.9114 |    | 1.0911    |

|        |                               |                           |    |         |        |        |         |        |        |         |        |         |
|--------|-------------------------------|---------------------------|----|---------|--------|--------|---------|--------|--------|---------|--------|---------|
| Stroke | s_Streptococcus_mitis         | Simple mode               | 37 | -0.4445 | 0.3719 | 0.2398 | 0.0167  | 0.0240 | 0.4911 | 24.3480 | 0.9114 | 1.0911  |
| Stroke | s_Streptococcus_mitis         | Weighted mode             | 37 | -0.3561 | 0.3267 | 0.2829 | 0.0167  | 0.0240 | 0.4911 | 24.3480 | 0.9114 | 1.0911  |
| Stroke | s_Streptococcus_mutans        | MR Egger                  | 37 | -0.0181 | 0.4421 | 0.9676 | -0.0058 | 0.0264 | 0.8278 | 34.3771 | 0.4980 | 3.0065  |
| Stroke | s_Streptococcus_mutans        | Weighted median           | 37 | -0.1054 | 0.2150 | 0.6239 | -0.0058 | 0.0264 | 0.8278 | 34.3771 | 0.4980 | 3.0065  |
| Stroke | s_Streptococcus_mutans        | Inverse variance weighted | 37 | -0.1096 | 0.1446 | 0.4482 | -0.0058 | 0.0264 | 0.8278 | 34.3771 | 0.4980 | 3.0065  |
| Stroke | s_Streptococcus_mutans        | Simple mode               | 37 | -0.3232 | 0.4740 | 0.4997 | -0.0058 | 0.0264 | 0.8278 | 34.3771 | 0.4980 | 3.0065  |
| Stroke | s_Streptococcus_mutans        | Weighted mode             | 37 | 0.1338  | 0.4383 | 0.7619 | -0.0058 | 0.0264 | 0.8278 | 34.3771 | 0.4980 | 3.0065  |
| Stroke | s_Streptococcus_oralis        | MR Egger                  | 37 | -0.4470 | 0.4532 | 0.3308 | 0.0323  | 0.0270 | 0.2399 | 28.9431 | 0.7919 | 2.6694  |
| Stroke | s_Streptococcus_oralis        | Weighted median           | 37 | -0.0027 | 0.2187 | 0.9900 | 0.0323  | 0.0270 | 0.2399 | 28.9431 | 0.7919 | 2.6694  |
| Stroke | s_Streptococcus_oralis        | Inverse variance weighted | 37 | 0.0651  | 0.1481 | 0.6605 | 0.0323  | 0.0270 | 0.2399 | 28.9431 | 0.7919 | 2.6694  |
| Stroke | s_Streptococcus_oralis        | Simple mode               | 37 | 0.1264  | 0.4466 | 0.7788 | 0.0323  | 0.0270 | 0.2399 | 28.9431 | 0.7919 | 2.6694  |
| Stroke | s_Streptococcus_oralis        | Weighted mode             | 37 | -0.1793 | 0.3548 | 0.6165 | 0.0323  | 0.0270 | 0.2399 | 28.9431 | 0.7919 | 2.6694  |
| Stroke | s_Streptococcus_parasanguinis | MR Egger                  | 37 | -0.5750 | 0.5755 | 0.3246 | 0.0193  | 0.0343 | 0.5768 | 37.3447 | 0.3618 | 2.0991  |
| Stroke | s_Streptococcus_parasanguinis | Weighted median           | 37 | -0.1004 | 0.2579 | 0.6971 | 0.0193  | 0.0343 | 0.5768 | 37.3447 | 0.3618 | 2.0991  |
| Stroke | s_Streptococcus_parasanguinis | Inverse variance weighted | 37 | -0.2686 | 0.1863 | 0.1495 | 0.0193  | 0.0343 | 0.5768 | 37.3447 | 0.3618 | 2.0991  |
| Stroke | s_Streptococcus_parasanguinis | Simple mode               | 37 | 0.2359  | 0.5465 | 0.6686 | 0.0193  | 0.0343 | 0.5768 | 37.3447 | 0.3618 | 2.0991  |
| Stroke | s_Streptococcus_parasanguinis | Weighted mode             | 37 | 0.1057  | 0.5287 | 0.8426 | 0.0193  | 0.0343 | 0.5768 | 37.3447 | 0.3618 | 2.0991  |
| Stroke | s_Streptococcus_pneumoniae    | MR Egger                  | 37 | -0.2271 | 0.3942 | 0.5682 | 0.0067  | 0.0235 | 0.7788 | 31.1314 | 0.6554 | 1.6635  |
| Stroke | s_Streptococcus_pneumoniae    | Weighted median           | 37 | -0.1629 | 0.1834 | 0.3745 | 0.0067  | 0.0235 | 0.7788 | 31.1314 | 0.6554 | 1.6635  |
| Stroke | s_Streptococcus_pneumoniae    | Inverse variance weighted | 37 | -0.1217 | 0.1289 | 0.3450 | 0.0067  | 0.0235 | 0.7788 | 31.1314 | 0.6554 | 1.6635  |
| Stroke | s_Streptococcus_pneumoniae    | Simple mode               | 37 | -0.3963 | 0.3761 | 0.2990 | 0.0067  | 0.0235 | 0.7788 | 31.1314 | 0.6554 | 1.6635  |
| Stroke | s_Streptococcus_pneumoniae    | Weighted mode             | 37 | -0.2963 | 0.3392 | 0.3882 | 0.0067  | 0.0235 | 0.7788 | 31.1314 | 0.6554 | 1.6635  |
| Stroke | s_Streptococcus_pyogenes      | MR Egger                  | 37 | 0.4974  | 0.7792 | 0.5274 | -0.0158 | 0.0465 | 0.7367 | 27.8247 | 0.8004 | 95.2284 |
| Stroke | s_Streptococcus_pyogenes      | Weighted median           | 37 | -0.0105 | 0.3703 | 0.9774 | -0.0158 | 0.0465 | 0.7367 | 27.8247 | 0.8004 | 95.2284 |
| Stroke | s_Streptococcus_pyogenes      | Inverse variance weighted | 37 | 0.2478  | 0.2546 | 0.3303 | -0.0158 | 0.0465 | 0.7367 | 27.8247 | 0.8004 | 95.2284 |
| Stroke | s_Streptococcus_pyogenes      | Simple mode               | 37 | 0.0627  | 0.6673 | 0.9257 | -0.0158 | 0.0465 | 0.7367 | 27.8247 | 0.8004 | 95.2284 |
| Stroke | s_Streptococcus_pyogenes      | Weighted mode             | 37 | -0.0610 | 0.6022 | 0.9198 | -0.0158 | 0.0465 | 0.7367 | 27.8247 | 0.8004 | 95.2284 |
| Stroke | s_Streptococcus_salivarius    | MR Egger                  | 37 | -1.0367 | 0.5522 | 0.0688 | 0.0607  | 0.0329 | 0.0740 | 42.5591 | 0.2095 | 3.5878  |
| Stroke | s_Streptococcus_salivarius    | Weighted median           | 37 | 0.0340  | 0.2621 | 0.8967 | 0.0607  | 0.0329 | 0.0740 | 42.5591 | 0.2095 | 3.5878  |
| Stroke | s_Streptococcus_salivarius    | Inverse variance weighted | 37 | -0.0755 | 0.1864 | 0.6856 | 0.0607  | 0.0329 | 0.0740 | 42.5591 | 0.2095 | 3.5878  |
| Stroke | s_Streptococcus_salivarius    | Simple mode               | 37 | 0.1920  | 0.5483 | 0.7282 | 0.0607  | 0.0329 | 0.0740 | 42.5591 | 0.2095 | 3.5878  |
| Stroke | s_Streptococcus_salivarius    | Weighted mode             | 37 | 0.1438  | 0.4943 | 0.7728 | 0.0607  | 0.0329 | 0.0740 | 42.5591 | 0.2095 | 3.5878  |
| Stroke | s_Streptococcus_sanguinis     | MR Egger                  | 37 | -0.3787 | 0.4657 | 0.4216 | 0.0153  | 0.0278 | 0.5842 | 31.9721 | 0.6151 | 1.7257  |
| Stroke | s_Streptococcus_sanguinis     | Weighted median           | 37 | -0.2389 | 0.2267 | 0.2921 | 0.0153  | 0.0278 | 0.5842 | 31.9721 | 0.6151 | 1.7257  |
| Stroke | s_Streptococcus_sanguinis     | Inverse variance weighted | 37 | -0.1356 | 0.1522 | 0.3730 | 0.0153  | 0.0278 | 0.5842 | 31.9721 | 0.6151 | 1.7257  |
| Stroke | s_Streptococcus_sanguinis     | Simple mode               | 37 | -0.1659 | 0.4388 | 0.7076 | 0.0153  | 0.0278 | 0.5842 | 31.9721 | 0.6151 | 1.7257  |
| Stroke | s_Streptococcus_sanguinis     | Weighted mode             | 37 | -0.5146 | 0.4120 | 0.2197 | 0.0153  | 0.0278 | 0.5842 | 31.9721 | 0.6151 | 1.7257  |
| Stroke | s_Streptococcus_suis          | MR Egger                  | 37 | 1.2223  | 0.6266 | 0.0591 | -0.0525 | 0.0374 | 0.1688 | 37.0732 | 0.4193 | 3.1983  |
| Stroke | s_Streptococcus_suis          | Weighted median           | 37 | 0.2092  | 0.2957 | 0.4793 | -0.0525 | 0.0374 | 0.1688 | 37.0732 | 0.4193 | 3.1983  |
| Stroke | s_Streptococcus_suis          | Inverse variance weighted | 37 | 0.3902  | 0.2075 | 0.0600 | -0.0525 | 0.0374 | 0.1688 | 37.0732 | 0.4193 | 3.1983  |
| Stroke | s_Streptococcus_suis          | Simple mode               | 37 | -0.4159 | 0.5872 | 0.4833 | -0.0525 | 0.0374 | 0.1688 | 37.0732 | 0.4193 | 3.1983  |
| Stroke | s_Streptococcus_suis          | Weighted mode             | 37 | -0.0724 | 0.4708 | 0.8787 | -0.0525 | 0.0374 | 0.1688 | 37.0732 | 0.4193 | 3.1983  |
| Stroke | s_Streptococcus_vestibularis  | MR Egger                  | 37 | -0.8271 | 0.5172 | 0.1188 | 0.0410  | 0.0309 | 0.1930 | 35.2905 | 0.5021 | 7.4566  |
| Stroke | s_Streptococcus_vestibularis  | Weighted median           | 37 | -0.1428 | 0.2500 | 0.5679 | 0.0410  | 0.0309 | 0.1930 | 35.2905 | 0.5021 | 7.4566  |
| Stroke | s_Streptococcus_vestibularis  | Inverse variance weighted | 37 | -0.1783 | 0.1691 | 0.2915 | 0.0410  | 0.0309 | 0.1930 | 35.2905 | 0.5021 | 7.4566  |
| Stroke | s_Streptococcus_vestibularis  | Simple mode               | 37 | -0.1236 | 0.5085 | 0.8093 | 0.0410  | 0.0309 | 0.1930 | 35.2905 | 0.5021 | 7.4566  |
| Stroke | s_Streptococcus_vestibularis  | Weighted mode             | 37 | -0.1569 | 0.4316 | 0.7183 | 0.0410  | 0.0309 | 0.1930 | 35.2905 | 0.5021 | 7.4566  |
| Stroke | s_Tannerella_forsythia        | MR Egger                  | 37 | 0.0595  | 0.6671 | 0.9294 | 0.0058  | 0.0398 | 0.8858 | 43.2811 | 0.1588 | 3.7158  |
| Stroke | s_Tannerella_forsythia        | Weighted median           | 37 | 0.1019  | 0.2882 | 0.7236 | 0.0058  | 0.0398 | 0.8858 | 43.2811 | 0.1588 | 3.7158  |
| Stroke | s_Tannerella_forsythia        | Inverse variance weighted | 37 | 0.1508  | 0.2150 | 0.4831 | 0.0058  | 0.0398 | 0.8858 | 43.2811 | 0.1588 | 3.7158  |
| Stroke | s_Tannerella_forsythia        | Simple mode               | 37 | -0.5050 | 0.6512 | 0.4431 | 0.0058  | 0.0398 | 0.8858 | 43.2811 | 0.1588 | 3.7158  |
| Stroke | s_Tannerella_forsythia        | Weighted mode             | 37 | 0.6300  | 0.5912 | 0.2936 | 0.0058  | 0.0398 | 0.8858 | 43.2811 | 0.1588 | 3.7158  |
| Stroke | s_Treponema_denticola         | MR Egger                  | 37 | 0.8585  | 0.4124 | 0.0447 | -0.0377 | 0.0246 | 0.1349 | 41.3548 | 0.2483 | 2.2113  |
| Stroke | s_Treponema_denticola         | Weighted median           | 37 | 0.2087  | 0.1947 | 0.2837 | -0.0377 | 0.0246 | 0.1349 | 41.3548 | 0.2483 | 2.2113  |
| Stroke | s_Treponema_denticola         | Inverse variance weighted | 37 | 0.2620  | 0.1373 | 0.0563 | -0.0377 | 0.0246 | 0.1349 | 41.3548 | 0.2483 | 2.2113  |
| Stroke | s_Treponema_denticola         | Simple mode               | 37 | -0.1741 | 0.4428 | 0.6964 | -0.0377 | 0.0246 | 0.1349 | 41.3548 | 0.2483 | 2.2113  |
| Stroke | s_Treponema_denticola         | Weighted mode             | 37 | 0.6160  | 0.4053 | 0.1373 | -0.0377 | 0.0246 | 0.1349 | 41.3548 | 0.2483 | 2.2113  |
| Stroke | s_Treponema_vincentii         | MR Egger                  | 37 | 0.1620  | 0.3576 | 0.6534 | 0.0052  | 0.0213 | 0.8098 | 27.2265 | 0.8231 | 5.5151  |
| Stroke | s_Treponema_vincentii         | Weighted median           | 37 | 0.0355  | 0.1677 | 0.8322 | 0.0052  | 0.0213 | 0.8098 | 27.2265 | 0.8231 | 5.5151  |
| Stroke | s_Treponema_vincentii         | Inverse variance weighted | 37 | 0.2439  | 0.1168 | 0.0368 | 0.0052  | 0.0213 | 0.8098 | 27.2265 | 0.8231 | 5.5151  |
| Stroke | s_Treponema_vincentii         | Simple mode               | 37 | -0.2695 | 0.3399 | 0.4330 | 0.0052  | 0.0213 | 0.8098 | 27.2265 | 0.8231 | 5.5151  |

|        |                                                  |                           |    |         |        |        |         |        |        |         |        |         |
|--------|--------------------------------------------------|---------------------------|----|---------|--------|--------|---------|--------|--------|---------|--------|---------|
| Stroke | s_Treponema_vincentii                            | Weighted mode             | 37 | -0.1835 | 0.2879 | 0.5280 | 0.0052  | 0.0213 | 0.8098 | 27.2265 | 0.8231 | 5.5151  |
| Stroke | s_Veillonella_atypica                            | MR Egger                  | 37 | -1.0866 | 0.6880 | 0.1233 | 0.0380  | 0.0410 | 0.3607 | 30.9710 | 0.6631 | 3.1010  |
| Stroke | s_Veillonella_atypica                            | Weighted median           | 37 | -0.6771 | 0.3322 | 0.0415 | 0.0380  | 0.0410 | 0.3607 | 30.9710 | 0.6631 | 3.1010  |
| Stroke | s_Veillonella_atypica                            | Inverse variance weighted | 37 | -0.4844 | 0.2249 | 0.0312 | 0.0380  | 0.0410 | 0.3607 | 30.9710 | 0.6631 | 3.1010  |
| Stroke | s_Veillonella_atypica                            | Simple mode               | 37 | -0.8472 | 0.6714 | 0.2151 | 0.0380  | 0.0410 | 0.3607 | 30.9710 | 0.6631 | 3.1010  |
| Stroke | s_Veillonella_atypica                            | Weighted mode             | 37 | -0.8990 | 0.5864 | 0.1340 | 0.0380  | 0.0410 | 0.3607 | 30.9710 | 0.6631 | 3.1010  |
| Stroke | s_Veillonella_dispar                             | MR Egger                  | 37 | -1.4039 | 0.7013 | 0.0531 | 0.0692  | 0.0418 | 0.1070 | 38.6224 | 0.3520 | 3.6671  |
| Stroke | s_Veillonella_dispar                             | Weighted median           | 37 | -0.2422 | 0.3413 | 0.4779 | 0.0692  | 0.0418 | 0.1070 | 38.6224 | 0.3520 | 3.6671  |
| Stroke | s_Veillonella_dispar                             | Inverse variance weighted | 37 | -0.3074 | 0.2347 | 0.1901 | 0.0692  | 0.0418 | 0.1070 | 38.6224 | 0.3520 | 3.6671  |
| Stroke | s_Veillonella_dispar                             | Simple mode               | 37 | -0.3177 | 0.6721 | 0.6393 | 0.0692  | 0.0418 | 0.1070 | 38.6224 | 0.3520 | 3.6671  |
| Stroke | s_Veillonella_dispar                             | Weighted mode             | 37 | -0.3177 | 0.5857 | 0.5908 | 0.0692  | 0.0418 | 0.1070 | 38.6224 | 0.3520 | 3.6671  |
| Stroke | s_Veillonella_parvula                            | MR Egger                  | 37 | -1.2336 | 0.6213 | 0.0550 | 0.0613  | 0.0371 | 0.1071 | 31.1801 | 0.6971 | 2.5997  |
| Stroke | s_Veillonella_parvula                            | Weighted median           | 37 | -0.4354 | 0.3051 | 0.1536 | 0.0613  | 0.0371 | 0.1071 | 31.1801 | 0.6971 | 2.5997  |
| Stroke | s_Veillonella_parvula                            | Inverse variance weighted | 37 | -0.2624 | 0.2031 | 0.1964 | 0.0613  | 0.0371 | 0.1071 | 31.1801 | 0.6971 | 2.5997  |
| Stroke | s_Veillonella_parvula                            | Simple mode               | 37 | -0.7827 | 0.6108 | 0.2082 | 0.0613  | 0.0371 | 0.1071 | 31.1801 | 0.6971 | 2.5997  |
| Stroke | s_Veillonella_parvula                            | Weighted mode             | 37 | -0.8303 | 0.5207 | 0.1195 | 0.0613  | 0.0371 | 0.1071 | 31.1801 | 0.6971 | 2.5997  |
| Stroke | s_butyrate-producing_bacterium                   | MR Egger                  | 37 | -0.2166 | 0.5271 | 0.6836 | 0.0186  | 0.0314 | 0.5581 | 27.7045 | 0.8051 | 1.0849  |
| Stroke | s_butyrate-producing_bacterium                   | Weighted median           | 37 | 0.0071  | 0.2409 | 0.9765 | 0.0186  | 0.0314 | 0.5581 | 27.7045 | 0.8051 | 1.0849  |
| Stroke | s_butyrate-producing_bacterium                   | Inverse variance weighted | 37 | 0.0780  | 0.1723 | 0.6507 | 0.0186  | 0.0314 | 0.5581 | 27.7045 | 0.8051 | 1.0849  |
| Stroke | s_butyrate-producing_bacterium                   | Simple mode               | 37 | 0.2652  | 0.4900 | 0.5917 | 0.0186  | 0.0314 | 0.5581 | 27.7045 | 0.8051 | 1.0849  |
| Stroke | s_butyrate-producing_bacterium                   | Weighted mode             | 37 | -0.0592 | 0.4225 | 0.8894 | 0.0186  | 0.0314 | 0.5581 | 27.7045 | 0.8051 | 1.0849  |
| Stroke | s_unclassified_Citrobacter_sp._30_2              | MR Egger                  | 37 | -0.4675 | 0.8872 | 0.6016 | 0.0428  | 0.0529 | 0.4239 | 44.8554 | 0.1229 | 13.5972 |
| Stroke | s_unclassified_Citrobacter_sp._30_2              | Weighted median           | 37 | 0.5528  | 0.3904 | 0.1568 | 0.0428  | 0.0529 | 0.4239 | 44.8554 | 0.1229 | 13.5972 |
| Stroke | s_unclassified_Citrobacter_sp._30_2              | Inverse variance weighted | 37 | 0.2110  | 0.2886 | 0.4647 | 0.0428  | 0.0529 | 0.4239 | 44.8554 | 0.1229 | 13.5972 |
| Stroke | s_unclassified_Citrobacter_sp._30_2              | Simple mode               | 37 | 0.9118  | 0.7567 | 0.2361 | 0.0428  | 0.0529 | 0.4239 | 44.8554 | 0.1229 | 13.5972 |
| Stroke | s_unclassified_Citrobacter_sp._30_2              | Weighted mode             | 37 | 0.8903  | 0.7584 | 0.2482 | 0.0428  | 0.0529 | 0.4239 | 44.8554 | 0.1229 | 13.5972 |
| Stroke | s_unclassified_Clostridiales_bacterium_1_7_47FAA | MR Egger                  | 37 | 0.2767  | 0.3203 | 0.3935 | -0.0214 | 0.0191 | 0.2702 | 23.5178 | 0.9458 | 11.9138 |
| Stroke | s_unclassified_Clostridiales_bacterium_1_7_47FAA | Weighted median           | 37 | -0.1544 | 0.1549 | 0.3187 | -0.0214 | 0.0191 | 0.2702 | 23.5178 | 0.9458 | 11.9138 |
| Stroke | s_unclassified_Clostridiales_bacterium_1_7_47FAA | Inverse variance weighted | 37 | -0.0624 | 0.1047 | 0.5508 | -0.0214 | 0.0191 | 0.2702 | 23.5178 | 0.9458 | 11.9138 |
| Stroke | s_unclassified_Clostridiales_bacterium_1_7_47FAA | Simple mode               | 37 | -0.2557 | 0.2848 | 0.3754 | -0.0214 | 0.0191 | 0.2702 | 23.5178 | 0.9458 | 11.9138 |
| Stroke | s_unclassified_Clostridiales_bacterium_1_7_47FAA | Weighted mode             | 37 | -0.2126 | 0.2433 | 0.3878 | -0.0214 | 0.0191 | 0.2702 | 23.5178 | 0.9458 | 11.9138 |
| Stroke | s_unclassified_Clostridium_sp._D5                | MR Egger                  | 37 | 0.4450  | 0.3668 | 0.2332 | -0.0184 | 0.0219 | 0.4071 | 35.8525 | 0.4283 | 3.7498  |
| Stroke | s_unclassified_Clostridium_sp._D5                | Weighted median           | 37 | 0.2123  | 0.1723 | 0.2177 | -0.0184 | 0.0219 | 0.4071 | 35.8525 | 0.4283 | 3.7498  |
| Stroke | s_unclassified_Clostridium_sp._D5                | Inverse variance weighted | 37 | 0.1541  | 0.1194 | 0.1966 | -0.0184 | 0.0219 | 0.4071 | 35.8525 | 0.4283 | 3.7498  |
| Stroke | s_unclassified_Clostridium_sp._D5                | Simple mode               | 37 | 0.3855  | 0.3689 | 0.3030 | -0.0184 | 0.0219 | 0.4071 | 35.8525 | 0.4283 | 3.7498  |
| Stroke | s_unclassified_Clostridium_sp._D5                | Weighted mode             | 37 | 0.3256  | 0.2805 | 0.2532 | -0.0184 | 0.0219 | 0.4071 | 35.8525 | 0.4283 | 3.7498  |
| Stroke | s_unclassified_Clostridium_sp._HGF2              | MR Egger                  | 37 | -0.0068 | 0.4552 | 0.9881 | 0.0050  | 0.0272 | 0.8552 | 21.1673 | 0.9684 | 7.6966  |
| Stroke | s_unclassified_Clostridium_sp._HGF2              | Weighted median           | 37 | 0.1395  | 0.2073 | 0.5009 | 0.0050  | 0.0272 | 0.8552 | 21.1673 | 0.9684 | 7.6966  |
| Stroke | s_unclassified_Clostridium_sp._HGF2              | Inverse variance weighted | 37 | 0.0722  | 0.1488 | 0.6274 | 0.0050  | 0.0272 | 0.8552 | 21.1673 | 0.9684 | 7.6966  |
| Stroke | s_unclassified_Clostridium_sp._HGF2              | Simple mode               | 37 | 0.2111  | 0.3960 | 0.5973 | 0.0050  | 0.0272 | 0.8552 | 21.1673 | 0.9684 | 7.6966  |
| Stroke | s_unclassified_Clostridium_sp._HGF2              | Weighted mode             | 37 | 0.2541  | 0.3860 | 0.5145 | 0.0050  | 0.0272 | 0.8552 | 21.1673 | 0.9684 | 7.6966  |
| Stroke | s_unclassified_Clostridium_sp._L2-50             | MR Egger                  | 37 | 1.1826  | 0.4345 | 0.0100 | -0.0624 | 0.0259 | 0.0214 | 37.8328 | 0.3856 | 1.0444  |
| Stroke | s_unclassified_Clostridium_sp._L2-50             | Weighted median           | 37 | 0.1165  | 0.1977 | 0.5556 | -0.0624 | 0.0259 | 0.0214 | 37.8328 | 0.3856 | 1.0444  |
| Stroke | s_unclassified_Clostridium_sp._L2-50             | Inverse variance weighted | 37 | 0.1935  | 0.1455 | 0.1838 | -0.0624 | 0.0259 | 0.0214 | 37.8328 | 0.3856 | 1.0444  |
| Stroke | s_unclassified_Clostridium_sp._L2-50             | Simple mode               | 37 | 0.0322  | 0.4026 | 0.9367 | -0.0624 | 0.0259 | 0.0214 | 37.8328 | 0.3856 | 1.0444  |
| Stroke | s_unclassified_Clostridium_sp._L2-50             | Weighted mode             | 37 | 0.0438  | 0.3957 | 0.9124 | -0.0624 | 0.0259 | 0.0214 | 37.8328 | 0.3856 | 1.0444  |
| Stroke | s_unclassified_Clostridium_sp._SY8519            | MR Egger                  | 37 | -0.2066 | 0.4980 | 0.6808 | 0.0039  | 0.0297 | 0.8957 | 28.7244 | 0.7640 | 2.0389  |
| Stroke | s_unclassified_Clostridium_sp._SY8519            | Weighted median           | 37 | -0.1271 | 0.2344 | 0.5876 | 0.0039  | 0.0297 | 0.8957 | 28.7244 | 0.7640 | 2.0389  |
| Stroke | s_unclassified_Clostridium_sp._SY8519            | Inverse variance weighted | 37 | -0.1444 | 0.1628 | 0.3749 | 0.0039  | 0.0297 | 0.8957 | 28.7244 | 0.7640 | 2.0389  |
| Stroke | s_unclassified_Clostridium_sp._SY8519            | Simple mode               | 37 | -0.0753 | 0.4928 | 0.8794 | 0.0039  | 0.0297 | 0.8957 | 28.7244 | 0.7640 | 2.0389  |
| Stroke | s_unclassified_Clostridium_sp._SY8519            | Weighted mode             | 37 | -0.0275 | 0.5005 | 0.9565 | 0.0039  | 0.0297 | 0.8957 | 28.7244 | 0.7640 | 2.0389  |
| Stroke | s_unclassified_Coprobacillus_sp._29_1            | MR Egger                  | 37 | -0.0484 | 0.4180 | 0.9085 | 0.0114  | 0.0249 | 0.6502 | 33.3603 | 0.5474 | 1.6587  |
| Stroke | s_unclassified_Coprobacillus_sp._29_1            | Weighted median           | 37 | 0.0673  | 0.1948 | 0.7295 | 0.0114  | 0.0249 | 0.6502 | 33.3603 | 0.5474 | 1.6587  |
| Stroke | s_unclassified_Coprobacillus_sp._29_1            | Inverse variance weighted | 37 | 0.1323  | 0.1366 | 0.3327 | 0.0114  | 0.0249 | 0.6502 | 33.3603 | 0.5474 | 1.6587  |
| Stroke | s_unclassified_Coprobacillus_sp._29_1            | Simple mode               | 37 | -0.1886 | 0.3950 | 0.6359 | 0.0114  | 0.0249 | 0.6502 | 33.3603 | 0.5474 | 1.6587  |
| Stroke | s_unclassified_Coprobacillus_sp._29_1            | Weighted mode             | 37 | -0.1886 | 0.3965 | 0.6372 | 0.0114  | 0.0249 | 0.6502 | 33.3603 | 0.5474 | 1.6587  |
| Stroke | s_unclassified_Desulfovibrio_sp._3_1_syn3        | MR Egger                  | 37 | 0.0369  | 0.7831 | 0.9627 | 0.0125  | 0.0467 | 0.7900 | 38.7055 | 0.3060 | 2.2054  |
| Stroke | s_unclassified_Desulfovibrio_sp._3_1_syn3        | Weighted median           | 37 | -0.2197 | 0.3674 | 0.5499 | 0.0125  | 0.0467 | 0.7900 | 38.7055 | 0.3060 | 2.2054  |
| Stroke | s_unclassified_Desulfovibrio_sp._3_1_syn3        | Inverse variance weighted | 37 | 0.2355  | 0.2527 | 0.3514 | 0.0125  | 0.0467 | 0.7900 | 38.7055 | 0.3060 | 2.2054  |
| Stroke | s_unclassified_Desulfovibrio_sp._3_1_syn3        | Simple mode               | 37 | -0.4638 | 0.7901 | 0.5609 | 0.0125  | 0.0467 | 0.7900 | 38.7055 | 0.3060 | 2.2054  |
| Stroke | s_unclassified_Desulfovibrio_sp._3_1_syn3        | Weighted mode             | 37 | -0.3618 | 0.6953 | 0.6061 | 0.0125  | 0.0467 | 0.7900 | 38.7055 | 0.3060 | 2.2054  |

|        |                                                        |                           |    |         |        |        |         |        |        |         |        |          |
|--------|--------------------------------------------------------|---------------------------|----|---------|--------|--------|---------|--------|--------|---------|--------|----------|
| Stroke | s_unclassified_Eggerthella_sp._YY7918                  | MR Egger                  | 37 | 0.4424  | 0.8545 | 0.6079 | -0.0200 | 0.0510 | 0.6967 | 46.5461 | 0.0918 | 4.7077   |
| Stroke | s_unclassified_Eggerthella_sp._YY7918                  | Weighted median           | 37 | 0.2738  | 0.3610 | 0.4483 | -0.0200 | 0.0510 | 0.6967 | 46.5461 | 0.0918 | 4.7077   |
| Stroke | s_unclassified_Eggerthella_sp._YY7918                  | Inverse variance weighted | 37 | 0.1251  | 0.2763 | 0.6507 | -0.0200 | 0.0510 | 0.6967 | 46.5461 | 0.0918 | 4.7077   |
| Stroke | s_unclassified_Eggerthella_sp._YY7918                  | Simple mode               | 37 | 0.7391  | 0.7327 | 0.3198 | -0.0200 | 0.0510 | 0.6967 | 46.5461 | 0.0918 | 4.7077   |
| Stroke | s_unclassified_Eggerthella_sp._YY7918                  | Weighted mode             | 37 | 0.3757  | 0.5977 | 0.5336 | -0.0200 | 0.0510 | 0.6967 | 46.5461 | 0.0918 | 4.7077   |
| Stroke | s_unclassified_Enterobacteriaceae_bacterium_9_2_54FAA  | MR Egger                  | 37 | -1.1330 | 0.8355 | 0.1837 | 0.0653  | 0.0498 | 0.1990 | 50.1740 | 0.0585 | 531.6782 |
| Stroke | s_unclassified_Enterobacteriaceae_bacterium_9_2_54FAA  | Weighted median           | 37 | 0.0240  | 0.3503 | 0.9453 | 0.0653  | 0.0498 | 0.1990 | 50.1740 | 0.0585 | 531.6782 |
| Stroke | s_unclassified_Enterobacteriaceae_bacterium_9_2_54FAA  | Inverse variance weighted | 37 | -0.0992 | 0.2759 | 0.7191 | 0.0653  | 0.0498 | 0.1990 | 50.1740 | 0.0585 | 531.6782 |
| Stroke | s_unclassified_Enterobacteriaceae_bacterium_9_2_54FAA  | Simple mode               | 37 | 0.0470  | 0.6556 | 0.9432 | 0.0653  | 0.0498 | 0.1990 | 50.1740 | 0.0585 | 531.6782 |
| Stroke | s_unclassified_Enterobacteriaceae_bacterium_9_2_54FAA  | Weighted mode             | 37 | 0.1298  | 0.6197 | 0.8352 | 0.0653  | 0.0498 | 0.1990 | 50.1740 | 0.0585 | 531.6782 |
| Stroke | s_unclassified_Erysipelotrichaceae_bacterium_3_1_53    | MR Egger                  | 37 | 0.1082  | 0.2522 | 0.6707 | 0.0024  | 0.0150 | 0.8751 | 30.1671 | 0.7005 | 12.9682  |
| Stroke | s_unclassified_Erysipelotrichaceae_bacterium_3_1_53    | Weighted median           | 37 | 0.1144  | 0.1214 | 0.3460 | 0.0024  | 0.0150 | 0.8751 | 30.1671 | 0.7005 | 12.9682  |
| Stroke | s_unclassified_Erysipelotrichaceae_bacterium_3_1_53    | Inverse variance weighted | 37 | 0.1459  | 0.0824 | 0.0766 | 0.0024  | 0.0150 | 0.8751 | 30.1671 | 0.7005 | 12.9682  |
| Stroke | s_unclassified_Erysipelotrichaceae_bacterium_3_1_53    | Simple mode               | 37 | 0.3349  | 0.2419 | 0.1748 | 0.0024  | 0.0150 | 0.8751 | 30.1671 | 0.7005 | 12.9682  |
| Stroke | s_unclassified_Erysipelotrichaceae_bacterium_3_1_53    | Weighted mode             | 37 | 0.0735  | 0.2189 | 0.7388 | 0.0024  | 0.0150 | 0.8751 | 30.1671 | 0.7005 | 12.9682  |
| Stroke | s_unclassified_Erysipelotrichaceae_bacterium_5_2_54FAA | MR Egger                  | 37 | 0.0286  | 0.3300 | 0.9315 | 0.0041  | 0.0197 | 0.8373 | 40.4813 | 0.2412 | 6.1952   |
| Stroke | s_unclassified_Erysipelotrichaceae_bacterium_5_2_54FAA | Weighted median           | 37 | -0.0242 | 0.1518 | 0.8731 | 0.0041  | 0.0197 | 0.8373 | 40.4813 | 0.2412 | 6.1952   |
| Stroke | s_unclassified_Erysipelotrichaceae_bacterium_5_2_54FAA | Inverse variance weighted | 37 | 0.0931  | 0.1064 | 0.3816 | 0.0041  | 0.0197 | 0.8373 | 40.4813 | 0.2412 | 6.1952   |
| Stroke | s_unclassified_Erysipelotrichaceae_bacterium_5_2_54FAA | Simple mode               | 37 | -0.3981 | 0.3492 | 0.2618 | 0.0041  | 0.0197 | 0.8373 | 40.4813 | 0.2412 | 6.1952   |
| Stroke | s_unclassified_Erysipelotrichaceae_bacterium_5_2_54FAA | Weighted mode             | 37 | -0.2715 | 0.3034 | 0.3768 | 0.0041  | 0.0197 | 0.8373 | 40.4813 | 0.2412 | 6.1952   |
| Stroke | s_unclassified_Lachnospiraceae_bacterium_1_4_56FAA     | MR Egger                  | 37 | -0.0724 | 0.3217 | 0.8233 | 0.0024  | 0.0192 | 0.9014 | 20.4570 | 0.9761 | 7.8043   |
| Stroke | s_unclassified_Lachnospiraceae_bacterium_1_4_56FAA     | Weighted median           | 37 | -0.1196 | 0.1426 | 0.4016 | 0.0024  | 0.0192 | 0.9014 | 20.4570 | 0.9761 | 7.8043   |
| Stroke | s_unclassified_Lachnospiraceae_bacterium_1_4_56FAA     | Inverse variance weighted | 37 | -0.0344 | 0.1051 | 0.7432 | 0.0024  | 0.0192 | 0.9014 | 20.4570 | 0.9761 | 7.8043   |
| Stroke | s_unclassified_Lachnospiraceae_bacterium_1_4_56FAA     | Simple mode               | 37 | -0.2945 | 0.2717 | 0.2855 | 0.0024  | 0.0192 | 0.9014 | 20.4570 | 0.9761 | 7.8043   |
| Stroke | s_unclassified_Lachnospiraceae_bacterium_1_4_56FAA     | Weighted mode             | 37 | -0.2164 | 0.2475 | 0.3876 | 0.0024  | 0.0192 | 0.9014 | 20.4570 | 0.9761 | 7.8043   |
| Stroke | s_unclassified_Lachnospiraceae_bacterium_2_1_46FAA     | MR Egger                  | 37 | -0.4720 | 0.4845 | 0.3366 | 0.0249  | 0.0289 | 0.3951 | 40.8200 | 0.2299 | 2.1669   |
| Stroke | s_unclassified_Lachnospiraceae_bacterium_2_1_46FAA     | Weighted median           | 37 | -0.0350 | 0.2164 | 0.8715 | 0.0249  | 0.0289 | 0.3951 | 40.8200 | 0.2299 | 2.1669   |
| Stroke | s_unclassified_Lachnospiraceae_bacterium_2_1_46FAA     | Inverse variance weighted | 37 | -0.0778 | 0.1577 | 0.6218 | 0.0249  | 0.0289 | 0.3951 | 40.8200 | 0.2299 | 2.1669   |
| Stroke | s_unclassified_Lachnospiraceae_bacterium_2_1_46FAA     | Simple mode               | 37 | 0.1314  | 0.4407 | 0.7674 | 0.0249  | 0.0289 | 0.3951 | 40.8200 | 0.2299 | 2.1669   |
| Stroke | s_unclassified_Lachnospiraceae_bacterium_2_1_46FAA     | Weighted mode             | 37 | 0.0751  | 0.3514 | 0.8319 | 0.0249  | 0.0289 | 0.3951 | 40.8200 | 0.2299 | 2.1669   |
| Stroke | s_unclassified_Lachnospiraceae_bacterium_3_1_57FAA_CT1 | MR Egger                  | 37 | 0.0398  | 0.3442 | 0.9085 | -0.0080 | 0.0205 | 0.7006 | 27.2354 | 0.8227 | 7.5058   |
| Stroke | s_unclassified_Lachnospiraceae_bacterium_3_1_57FAA_CT1 | Weighted median           | 37 | -0.1574 | 0.1599 | 0.3247 | -0.0080 | 0.0205 | 0.7006 | 27.2354 | 0.8227 | 7.5058   |
| Stroke | s_unclassified_Lachnospiraceae_bacterium_3_1_57FAA_CT1 | Inverse variance weighted | 37 | -0.0863 | 0.1125 | 0.4432 | -0.0080 | 0.0205 | 0.7006 | 27.2354 | 0.8227 | 7.5058   |
| Stroke | s_unclassified_Lachnospiraceae_bacterium_3_1_57FAA_CT1 | Simple mode               | 37 | -0.2241 | 0.3445 | 0.5194 | -0.0080 | 0.0205 | 0.7006 | 27.2354 | 0.8227 | 7.5058   |
| Stroke | s_unclassified_Lachnospiraceae_bacterium_3_1_57FAA_CT1 | Weighted mode             | 37 | -0.1974 | 0.3318 | 0.5556 | -0.0080 | 0.0205 | 0.7006 | 27.2354 | 0.8227 | 7.5058   |
| Stroke | s_unclassified_Lachnospiraceae_bacterium_9_1_43BFAA    | MR Egger                  | 37 | -0.1958 | 0.4524 | 0.6679 | 0.0121  | 0.0270 | 0.6555 | 27.9390 | 0.7960 | 4.9988   |
| Stroke | s_unclassified_Lachnospiraceae_bacterium_9_1_43BFAA    | Weighted median           | 37 | -0.0516 | 0.2045 | 0.8009 | 0.0121  | 0.0270 | 0.6555 | 27.9390 | 0.7960 | 4.9988   |
| Stroke | s_unclassified_Lachnospiraceae_bacterium_9_1_43BFAA    | Inverse variance weighted | 37 | -0.0034 | 0.1478 | 0.9818 | 0.0121  | 0.0270 | 0.6555 | 27.9390 | 0.7960 | 4.9988   |
| Stroke | s_unclassified_Lachnospiraceae_bacterium_9_1_43BFAA    | Simple mode               | 37 | 0.1804  | 0.3677 | 0.6267 | 0.0121  | 0.0270 | 0.6555 | 27.9390 | 0.7960 | 4.9988   |
| Stroke | s_unclassified_Lachnospiraceae_bacterium_9_1_43BFAA    | Weighted mode             | 37 | 0.0595  | 0.3233 | 0.8550 | 0.0121  | 0.0270 | 0.6555 | 27.9390 | 0.7960 | 4.9988   |
| Stroke | s_unclassified_Megasphaera_sp._UPII_135-E              | MR Egger                  | 37 | 0.0815  | 0.3670 | 0.8256 | -0.0025 | 0.0219 | 0.9107 | 33.5020 | 0.5405 | 4.5342   |
| Stroke | s_unclassified_Megasphaera_sp._UPII_135-E              | Weighted median           | 37 | 0.0821  | 0.1758 | 0.6406 | -0.0025 | 0.0219 | 0.9107 | 33.5020 | 0.5405 | 4.5342   |
| Stroke | s_unclassified_Megasphaera_sp._UPII_135-E              | Inverse variance weighted | 37 | 0.0423  | 0.1199 | 0.7241 | -0.0025 | 0.0219 | 0.9107 | 33.5020 | 0.5405 | 4.5342   |
| Stroke | s_unclassified_Megasphaera_sp._UPII_135-E              | Simple mode               | 37 | 0.2726  | 0.3650 | 0.4601 | -0.0025 | 0.0219 | 0.9107 | 33.5020 | 0.5405 | 4.5342   |
| Stroke | s_unclassified_Megasphaera_sp._UPII_135-E              | Weighted mode             | 37 | 0.1264  | 0.3299 | 0.7038 | -0.0025 | 0.0219 | 0.9107 | 33.5020 | 0.5405 | 4.5342   |
| Stroke | s_unclassified_Oribacterium_sp._oral_taxon_078         | MR Egger                  | 37 | -0.0027 | 0.7394 | 0.9971 | -0.0153 | 0.0441 | 0.7306 | 31.6826 | 0.6291 | 38.5003  |
| Stroke | s_unclassified_Oribacterium_sp._oral_taxon_078         | Weighted median           | 37 | -0.3333 | 0.3481 | 0.3383 | -0.0153 | 0.0441 | 0.7306 | 31.6826 | 0.6291 | 38.5003  |
| Stroke | s_unclassified_Oribacterium_sp._oral_taxon_078         | Inverse variance weighted | 37 | -0.2453 | 0.2414 | 0.3096 | -0.0153 | 0.0441 | 0.7306 | 31.6826 | 0.6291 | 38.5003  |
| Stroke | s_unclassified_Oribacterium_sp._oral_taxon_078         | Simple mode               | 37 | -0.2942 | 0.6882 | 0.6715 | -0.0153 | 0.0441 | 0.7306 | 31.6826 | 0.6291 | 38.5003  |
| Stroke | s_unclassified_Oribacterium_sp._oral_taxon_078         | Weighted mode             | 37 | -0.1901 | 0.6486 | 0.7711 | -0.0153 | 0.0441 | 0.7306 | 31.6826 | 0.6291 | 38.5003  |
| Stroke | s_unclassified_Oribacterium_sp._oral_taxon_108         | MR Egger                  | 37 | 0.4049  | 0.7352 | 0.5853 | -0.0353 | 0.0438 | 0.4263 | 24.0915 | 0.9176 | 1.9472   |
| Stroke | s_unclassified_Oribacterium_sp._oral_taxon_108         | Weighted median           | 37 | -0.0824 | 0.3338 | 0.8051 | -0.0353 | 0.0438 | 0.4263 | 24.0915 | 0.9176 | 1.9472   |
| Stroke | s_unclassified_Oribacterium_sp._oral_taxon_108         | Inverse variance weighted | 37 | -0.1544 | 0.2400 | 0.5200 | -0.0353 | 0.0438 | 0.4263 | 24.0915 | 0.9176 | 1.9472   |
| Stroke | s_unclassified_Oribacterium_sp._oral_taxon_108         | Simple mode               | 37 | -0.9426 | 0.7029 | 0.1883 | -0.0353 | 0.0438 | 0.4263 | 24.0915 | 0.9176 | 1.9472   |
| Stroke | s_unclassified_Oribacterium_sp._oral_taxon_108         | Weighted mode             | 37 | 0.1093  | 0.6293 | 0.8631 | -0.0353 | 0.0438 | 0.4263 | 24.0915 | 0.9176 | 1.9472   |
| Stroke | s_unclassified_Peptoniphilus_sp._oral_taxon_386        | MR Egger                  | 37 | 0.4974  | 0.8602 | 0.5668 | -0.0405 | 0.0513 | 0.4345 | 47.8641 | 0.0723 | 208.6369 |
| Stroke | s_unclassified_Peptoniphilus_sp._oral_taxon_386        | Weighted median           | 37 | 0.2146  | 0.3627 | 0.5541 | -0.0405 | 0.0513 | 0.4345 | 47.8641 | 0.0723 | 208.6369 |
| Stroke | s_unclassified_Peptoniphilus_sp._oral_taxon_386        | Inverse variance weighted | 37 | -0.1454 | 0.2793 | 0.6027 | -0.0405 | 0.0513 | 0.4345 | 47.8641 | 0.0723 | 208.6369 |
| Stroke | s_unclassified_Peptoniphilus_sp._oral_taxon_386        | Simple mode               | 37 | 0.5688  | 0.6056 | 0.3538 | -0.0405 | 0.0513 | 0.4345 | 47.8641 | 0.0723 | 208.6369 |
| Stroke | s_unclassified_Peptoniphilus_sp._oral_taxon_386        | Weighted mode             | 37 | 0.4695  | 0.5398 | 0.3901 | -0.0405 | 0.0513 | 0.4345 | 47.8641 | 0.0723 | 208.6369 |
| Stroke | s_unclassified_Prevotella_sp._oral_taxon_472           | MR Egger                  | 37 | -0.1192 | 0.7360 | 0.8723 | 0.0113  | 0.0439 | 0.7984 | 28.9134 | 0.7560 | 4.1682   |

|        |                                                 |                           |    |         |        |        |         |        |        |         |        |        |
|--------|-------------------------------------------------|---------------------------|----|---------|--------|--------|---------|--------|--------|---------|--------|--------|
| Stroke | s_unclassified_Prevotella_sp._oral_taxon_472    | Weighted median           | 37 | 0.2333  | 0.3368 | 0.4885 | 0.0113  | 0.0439 | 0.7984 | 28.9134 | 0.7560 | 4.1682 |
| Stroke | s_unclassified_Prevotella_sp._oral_taxon_472    | Inverse variance weighted | 37 | 0.0599  | 0.2404 | 0.8033 | 0.0113  | 0.0439 | 0.7984 | 28.9134 | 0.7560 | 4.1682 |
| Stroke | s_unclassified_Prevotella_sp._oral_taxon_472    | Simple mode               | 37 | 0.3211  | 0.7243 | 0.6601 | 0.0113  | 0.0439 | 0.7984 | 28.9134 | 0.7560 | 4.1682 |
| Stroke | s_unclassified_Prevotella_sp._oral_taxon_472    | Weighted mode             | 37 | 0.2855  | 0.5500 | 0.6068 | 0.0113  | 0.0439 | 0.7984 | 28.9134 | 0.7560 | 4.1682 |
| Stroke | s_unclassified_Ruminococcaceae_bacterium_D16    | MR Egger                  | 37 | 0.3876  | 0.3118 | 0.2221 | -0.0109 | 0.0186 | 0.5615 | 30.9030 | 0.6663 | 6.2469 |
| Stroke | s_unclassified_Ruminococcaceae_bacterium_D16    | Weighted median           | 37 | 0.2436  | 0.1496 | 0.1034 | -0.0109 | 0.0186 | 0.5615 | 30.9030 | 0.6663 | 6.2469 |
| Stroke | s_unclassified_Ruminococcaceae_bacterium_D16    | Inverse variance weighted | 37 | 0.2148  | 0.1019 | 0.0350 | -0.0109 | 0.0186 | 0.5615 | 30.9030 | 0.6663 | 6.2469 |
| Stroke | s_unclassified_Ruminococcaceae_bacterium_D16    | Simple mode               | 37 | 0.5049  | 0.2985 | 0.0994 | -0.0109 | 0.0186 | 0.5615 | 30.9030 | 0.6663 | 6.2469 |
| Stroke | s_unclassified_Ruminococcaceae_bacterium_D16    | Weighted mode             | 37 | 0.3799  | 0.2414 | 0.1243 | -0.0109 | 0.0186 | 0.5615 | 30.9030 | 0.6663 | 6.2469 |
| Stroke | s_unclassified_Ruminococcus_sp._5_1_39BFAA      | MR Egger                  | 37 | -0.2933 | 0.3762 | 0.4409 | 0.0248  | 0.0224 | 0.2775 | 36.6185 | 0.4400 | 2.0133 |
| Stroke | s_unclassified_Ruminococcus_sp._5_1_39BFAA      | Weighted median           | 37 | 0.1772  | 0.1786 | 0.3212 | 0.0248  | 0.0224 | 0.2775 | 36.6185 | 0.4400 | 2.0133 |
| Stroke | s_unclassified_Ruminococcus_sp._5_1_39BFAA      | Inverse variance weighted | 37 | 0.0989  | 0.1233 | 0.4225 | 0.0248  | 0.0224 | 0.2775 | 36.6185 | 0.4400 | 2.0133 |
| Stroke | s_unclassified_Ruminococcus_sp._5_1_39BFAA      | Simple mode               | 37 | 0.2111  | 0.3589 | 0.5600 | 0.0248  | 0.0224 | 0.2775 | 36.6185 | 0.4400 | 2.0133 |
| Stroke | s_unclassified_Ruminococcus_sp._5_1_39BFAA      | Weighted mode             | 37 | 0.1811  | 0.3401 | 0.5976 | 0.0248  | 0.0224 | 0.2775 | 36.6185 | 0.4400 | 2.0133 |
| Stroke | s_unclassified_Streptococcus_sp._C150           | MR Egger                  | 37 | -0.5776 | 0.5269 | 0.2805 | 0.0311  | 0.0314 | 0.3294 | 36.3840 | 0.4041 | 1.2415 |
| Stroke | s_unclassified_Streptococcus_sp._C150           | Weighted median           | 37 | -0.0585 | 0.2418 | 0.8087 | 0.0311  | 0.0314 | 0.3294 | 36.3840 | 0.4041 | 1.2415 |
| Stroke | s_unclassified_Streptococcus_sp._C150           | Inverse variance weighted | 37 | -0.0850 | 0.1722 | 0.6216 | 0.0311  | 0.0314 | 0.3294 | 36.3840 | 0.4041 | 1.2415 |
| Stroke | s_unclassified_Streptococcus_sp._C150           | Simple mode               | 37 | 0.2048  | 0.5579 | 0.7157 | 0.0311  | 0.0314 | 0.3294 | 36.3840 | 0.4041 | 1.2415 |
| Stroke | s_unclassified_Streptococcus_sp._C150           | Weighted mode             | 37 | 0.1045  | 0.4618 | 0.8223 | 0.0311  | 0.0314 | 0.3294 | 36.3840 | 0.4041 | 1.2415 |
| Stroke | s_unclassified_Streptococcus_sp._M143           | MR Egger                  | 37 | -0.0082 | 0.7323 | 0.9911 | -0.0002 | 0.0437 | 0.9958 | 25.2499 | 0.8876 | 1.1657 |
| Stroke | s_unclassified_Streptococcus_sp._M143           | Weighted median           | 37 | 0.1401  | 0.3302 | 0.6713 | -0.0002 | 0.0437 | 0.9958 | 25.2499 | 0.8876 | 1.1657 |
| Stroke | s_unclassified_Streptococcus_sp._M143           | Inverse variance weighted | 37 | -0.0119 | 0.2390 | 0.9602 | -0.0002 | 0.0437 | 0.9958 | 25.2499 | 0.8876 | 1.1657 |
| Stroke | s_unclassified_Streptococcus_sp._M143           | Simple mode               | 37 | 0.2799  | 0.6268 | 0.6579 | -0.0002 | 0.0437 | 0.9958 | 25.2499 | 0.8876 | 1.1657 |
| Stroke | s_unclassified_Streptococcus_sp._M143           | Weighted mode             | 37 | 0.2612  | 0.5897 | 0.6605 | -0.0002 | 0.0437 | 0.9958 | 25.2499 | 0.8876 | 1.1657 |
| Stroke | s_unclassified_Streptococcus_sp._oral_taxon_071 | MR Egger                  | 37 | -0.2502 | 0.4224 | 0.5575 | 0.0140  | 0.0252 | 0.5831 | 31.1415 | 0.6550 | 1.0360 |
| Stroke | s_unclassified_Streptococcus_sp._oral_taxon_071 | Weighted median           | 37 | -0.0956 | 0.1995 | 0.6319 | 0.0140  | 0.0252 | 0.5831 | 31.1415 | 0.6550 | 1.0360 |
| Stroke | s_unclassified_Streptococcus_sp._oral_taxon_071 | Inverse variance weighted | 37 | -0.0290 | 0.1380 | 0.8337 | 0.0140  | 0.0252 | 0.5831 | 31.1415 | 0.6550 | 1.0360 |
| Stroke | s_unclassified_Streptococcus_sp._oral_taxon_071 | Simple mode               | 37 | -0.1301 | 0.3827 | 0.7359 | 0.0140  | 0.0252 | 0.5831 | 31.1415 | 0.6550 | 1.0360 |
| Stroke | s_unclassified_Streptococcus_sp._oral_taxon_071 | Weighted mode             | 37 | -0.2643 | 0.3474 | 0.4518 | 0.0140  | 0.0252 | 0.5831 | 31.1415 | 0.6550 | 1.0360 |
| Stroke | s_unclassified_Veillonella_sp._oral_taxon_158   | MR Egger                  | 37 | -1.4293 | 0.6009 | 0.0230 | 0.0766  | 0.0358 | 0.0398 | 34.9110 | 0.5203 | 1.6272 |
| Stroke | s_unclassified_Veillonella_sp._oral_taxon_158   | Weighted median           | 37 | -0.1758 | 0.2786 | 0.5280 | 0.0766  | 0.0358 | 0.0398 | 34.9110 | 0.5203 | 1.6272 |
| Stroke | s_unclassified_Veillonella_sp._oral_taxon_158   | Inverse variance weighted | 37 | -0.2163 | 0.1964 | 0.2707 | 0.0766  | 0.0358 | 0.0398 | 34.9110 | 0.5203 | 1.6272 |
| Stroke | s_unclassified_Veillonella_sp._oral_taxon_158   | Simple mode               | 37 | 0.1168  | 0.5675 | 0.8381 | 0.0766  | 0.0358 | 0.0398 | 34.9110 | 0.5203 | 1.6272 |
| Stroke | s_unclassified_Veillonella_sp._oral_taxon_158   | Weighted mode             | 37 | -0.5223 | 0.4844 | 0.2881 | 0.0766  | 0.0358 | 0.0398 | 34.9110 | 0.5203 | 1.6272 |

Table.S11.Mendelian Randomization result for stroke to gut microbiome in EU

| exposure            | outcome                              | method                    | nsnp | b       | se     | pval   | egger intercept | pleio se | pleio p Q | Q pval  | sensitivity ratio |          |
|---------------------|--------------------------------------|---------------------------|------|---------|--------|--------|-----------------|----------|-----------|---------|-------------------|----------|
| CardioEmbolicStroke | class. Actinobacteria. id. 419       | MR Egger                  | 8    | -0.0412 | 0.0888 | 0.6591 | 0.0059          | 0.0122   | 0.6478    | 5.5619  | 0.4740            | 95.8030  |
| CardioEmbolicStroke | class. Actinobacteria. id. 419       | MR Egger                  | 8    | -0.0412 | 0.0888 | 0.6591 | 0.0059          | 0.0122   | 0.6478    | 5.5619  | 0.4740            | 95.8030  |
| CardioEmbolicStroke | class. Actinobacteria. id. 419       | Weighted median           | 8    | 0.0128  | 0.0422 | 0.7612 | 0.0059          | 0.0122   | 0.6478    | 5.5619  | 0.4740            | 95.8030  |
| CardioEmbolicStroke | class. Actinobacteria. id. 419       | Weighted median           | 8    | 0.0128  | 0.0422 | 0.7612 | 0.0059          | 0.0122   | 0.6478    | 5.5619  | 0.4740            | 95.8030  |
| CardioEmbolicStroke | class. Actinobacteria. id. 419       | Inverse variance weighted | 8    | -0.0019 | 0.0347 | 0.9563 | 0.0059          | 0.0122   | 0.6478    | 5.5619  | 0.4740            | 95.8030  |
| CardioEmbolicStroke | class. Actinobacteria. id. 419       | Inverse variance weighted | 8    | -0.0019 | 0.0347 | 0.9563 | 0.0059          | 0.0122   | 0.6478    | 5.5619  | 0.4740            | 95.8030  |
| CardioEmbolicStroke | class. Actinobacteria. id. 419       | Simple mode               | 8    | 0.0725  | 0.0685 | 0.3255 | 0.0059          | 0.0122   | 0.6478    | 5.5619  | 0.4740            | 95.8030  |
| CardioEmbolicStroke | class. Actinobacteria. id. 419       | Simple mode               | 8    | 0.0725  | 0.0685 | 0.3255 | 0.0059          | 0.0122   | 0.6478    | 5.5619  | 0.4740            | 95.8030  |
| CardioEmbolicStroke | class. Actinobacteria. id. 419       | Weighted mode             | 8    | 0.0047  | 0.0463 | 0.9226 | 0.0059          | 0.0122   | 0.6478    | 5.5619  | 0.4740            | 95.8030  |
| CardioEmbolicStroke | class. Actinobacteria. id. 419       | Weighted mode             | 8    | 0.0047  | 0.0463 | 0.9226 | 0.0059          | 0.0122   | 0.6478    | 5.5619  | 0.4740            | 95.8030  |
| CardioEmbolicStroke | class. Actinobacteria. id. 419       | MR Egger                  | 8    | -0.0412 | 0.0888 | 0.6591 | 0.0059          | 0.0122   | 0.6478    | 5.5619  | 0.4740            | 95.8030  |
| CardioEmbolicStroke | class. Actinobacteria. id. 419       | MR Egger                  | 8    | -0.0412 | 0.0888 | 0.6591 | 0.0059          | 0.0122   | 0.6478    | 5.5619  | 0.4740            | 95.8030  |
| CardioEmbolicStroke | class. Actinobacteria. id. 419       | Weighted median           | 8    | 0.0128  | 0.0434 | 0.7675 | 0.0059          | 0.0122   | 0.6478    | 5.5619  | 0.4740            | 95.8030  |
| CardioEmbolicStroke | class. Actinobacteria. id. 419       | Weighted median           | 8    | 0.0128  | 0.0434 | 0.7675 | 0.0059          | 0.0122   | 0.6478    | 5.5619  | 0.4740            | 95.8030  |
| CardioEmbolicStroke | class. Actinobacteria. id. 419       | Inverse variance weighted | 8    | -0.0019 | 0.0347 | 0.9563 | 0.0059          | 0.0122   | 0.6478    | 5.5619  | 0.4740            | 95.8030  |
| CardioEmbolicStroke | class. Actinobacteria. id. 419       | Inverse variance weighted | 8    | -0.0019 | 0.0347 | 0.9563 | 0.0059          | 0.0122   | 0.6478    | 5.5619  | 0.4740            | 95.8030  |
| CardioEmbolicStroke | class. Actinobacteria. id. 419       | Simple mode               | 8    | 0.0725  | 0.0740 | 0.3598 | 0.0059          | 0.0122   | 0.6478    | 5.5619  | 0.4740            | 95.8030  |
| CardioEmbolicStroke | class. Actinobacteria. id. 419       | Simple mode               | 8    | 0.0725  | 0.0740 | 0.3598 | 0.0059          | 0.0122   | 0.6478    | 5.5619  | 0.4740            | 95.8030  |
| CardioEmbolicStroke | class. Actinobacteria. id. 419       | Weighted mode             | 8    | 0.0047  | 0.0513 | 0.9302 | 0.0059          | 0.0122   | 0.6478    | 5.5619  | 0.4740            | 95.8030  |
| CardioEmbolicStroke | class. Actinobacteria. id. 419       | Weighted mode             | 8    | 0.0047  | 0.0513 | 0.9302 | 0.0059          | 0.0122   | 0.6478    | 5.5619  | 0.4740            | 95.8030  |
| CardioEmbolicStroke | class. Alphaproteobacteria. id. 2379 | MR Egger                  | 8    | -0.1281 | 0.1166 | 0.3140 | 0.0058          | 0.0161   | 0.7325    | 6.0473  | 0.4179            | 53.2956  |
| CardioEmbolicStroke | class. Alphaproteobacteria. id. 2379 | Weighted median           | 8    | -0.0966 | 0.0570 | 0.0898 | 0.0058          | 0.0161   | 0.7325    | 6.0473  | 0.4179            | 53.2956  |
| CardioEmbolicStroke | class. Alphaproteobacteria. id. 2379 | Inverse variance weighted | 8    | -0.0897 | 0.0454 | 0.0481 | 0.0058          | 0.0161   | 0.7325    | 6.0473  | 0.4179            | 53.2956  |
| CardioEmbolicStroke | class. Alphaproteobacteria. id. 2379 | Simple mode               | 8    | 0.0458  | 0.1020 | 0.6674 | 0.0058          | 0.0161   | 0.7325    | 6.0473  | 0.4179            | 53.2956  |
| CardioEmbolicStroke | class. Alphaproteobacteria. id. 2379 | Weighted mode             | 8    | -0.1419 | 0.0676 | 0.0739 | 0.0058          | 0.0161   | 0.7325    | 6.0473  | 0.4179            | 53.2956  |
| CardioEmbolicStroke | class. Bacilli. id. 1673             | MR Egger                  | 8    | 0.0397  | 0.0860 | 0.6607 | 0.0013          | 0.0119   | 0.9195    | 4.5832  | 0.5983            | 99.9346  |
| CardioEmbolicStroke | class. Bacilli. id. 1673             | Weighted median           | 8    | 0.0575  | 0.0419 | 0.1698 | 0.0013          | 0.0119   | 0.9195    | 4.5832  | 0.5983            | 99.9346  |
| CardioEmbolicStroke | class. Bacilli. id. 1673             | Inverse variance weighted | 8    | 0.0481  | 0.0337 | 0.1534 | 0.0013          | 0.0119   | 0.9195    | 4.5832  | 0.5983            | 99.9346  |
| CardioEmbolicStroke | class. Bacilli. id. 1673             | Simple mode               | 8    | 0.0939  | 0.0634 | 0.1822 | 0.0013          | 0.0119   | 0.9195    | 4.5832  | 0.5983            | 99.9346  |
| CardioEmbolicStroke | class. Bacilli. id. 1673             | Weighted mode             | 8    | 0.0575  | 0.0465 | 0.2560 | 0.0013          | 0.0119   | 0.9195    | 4.5832  | 0.5983            | 99.9346  |
| CardioEmbolicStroke | class. Bacteroidia. id. 912          | MR Egger                  | 8    | -0.0259 | 0.0902 | 0.7840 | 0.0047          | 0.0125   | 0.7173    | 6.9764  | 0.3230            | 94.5558  |
| CardioEmbolicStroke | class. Bacteroidia. id. 912          | Weighted median           | 8    | -0.0274 | 0.0412 | 0.5054 | 0.0047          | 0.0125   | 0.7173    | 6.9764  | 0.3230            | 94.5558  |
| CardioEmbolicStroke | class. Bacteroidia. id. 912          | Inverse variance weighted | 8    | 0.0056  | 0.0331 | 0.8645 | 0.0047          | 0.0125   | 0.7173    | 6.9764  | 0.3230            | 94.5558  |
| CardioEmbolicStroke | class. Bacteroidia. id. 912          | Simple mode               | 8    | -0.0539 | 0.0667 | 0.4455 | 0.0047          | 0.0125   | 0.7173    | 6.9764  | 0.3230            | 94.5558  |
| CardioEmbolicStroke | class. Bacteroidia. id. 912          | Weighted mode             | 8    | -0.0355 | 0.0477 | 0.4814 | 0.0047          | 0.0125   | 0.7173    | 6.9764  | 0.3230            | 94.5558  |
| CardioEmbolicStroke | class. Betaproteobacteria. id. 2867  | MR Egger                  | 8    | -0.0538 | 0.0864 | 0.5560 | 0.0052          | 0.0119   | 0.6766    | 3.1753  | 0.7865            | 144.5644 |
| CardioEmbolicStroke | class. Betaproteobacteria. id. 2867  | Weighted median           | 8    | -0.0272 | 0.0421 | 0.5181 | 0.0052          | 0.0119   | 0.6766    | 3.1753  | 0.7865            | 144.5644 |
| CardioEmbolicStroke | class. Betaproteobacteria. id. 2867  | Inverse variance weighted | 8    | -0.0190 | 0.0338 | 0.5741 | 0.0052          | 0.0119   | 0.6766    | 3.1753  | 0.7865            | 144.5644 |
| CardioEmbolicStroke | class. Betaproteobacteria. id. 2867  | Simple mode               | 8    | -0.0049 | 0.0645 | 0.9413 | 0.0052          | 0.0119   | 0.6766    | 3.1753  | 0.7865            | 144.5644 |
| CardioEmbolicStroke | class. Betaproteobacteria. id. 2867  | Weighted mode             | 8    | -0.0355 | 0.0472 | 0.4767 | 0.0052          | 0.0119   | 0.6766    | 3.1753  | 0.7865            | 144.5644 |
| CardioEmbolicStroke | class. Clostridia. id. 1859          | MR Egger                  | 8    | 0.0295  | 0.0836 | 0.7363 | -0.0093         | 0.0115   | 0.4495    | 5.4993  | 0.4815            | 94.2034  |
| CardioEmbolicStroke | class. Clostridia. id. 1859          | Weighted median           | 8    | 0.0015  | 0.0419 | 0.9718 | -0.0093         | 0.0115   | 0.4495    | 5.4993  | 0.4815            | 94.2034  |
| CardioEmbolicStroke | class. Clostridia. id. 1859          | Inverse variance weighted | 8    | -0.0327 | 0.0327 | 0.3176 | -0.0093         | 0.0115   | 0.4495    | 5.4993  | 0.4815            | 94.2034  |
| CardioEmbolicStroke | class. Clostridia. id. 1859          | Simple mode               | 8    | -0.1409 | 0.0884 | 0.1552 | -0.0093         | 0.0115   | 0.4495    | 5.4993  | 0.4815            | 94.2034  |
| CardioEmbolicStroke | class. Clostridia. id. 1859          | Weighted mode             | 8    | 0.0184  | 0.0489 | 0.7170 | -0.0093         | 0.0115   | 0.4495    | 5.4993  | 0.4815            | 94.2034  |
| CardioEmbolicStroke | class. Coriobacteriia. id. 809       | MR Egger                  | 8    | -0.0266 | 0.0853 | 0.7659 | 0.0110          | 0.0118   | 0.3842    | 4.0254  | 0.7768            | 99.8256  |
| CardioEmbolicStroke | class. Coriobacteriia. id. 809       | Weighted median           | 8    | 0.0240  | 0.0421 | 0.5689 | 0.0110          | 0.0118   | 0.3842    | 4.0254  | 0.7768            | 99.8256  |
| CardioEmbolicStroke | class. Coriobacteriia. id. 809       | Inverse variance weighted | 8    | 0.0471  | 0.0334 | 0.1580 | 0.0110          | 0.0118   | 0.3842    | 4.0254  | 0.7768            | 99.8256  |
| CardioEmbolicStroke | class. Coriobacteriia. id. 809       | Simple mode               | 8    | 0.0405  | 0.0579 | 0.5069 | 0.0110          | 0.0118   | 0.3842    | 4.0254  | 0.7768            | 99.8256  |
| CardioEmbolicStroke | class. Coriobacteriia. id. 809       | Weighted mode             | 8    | 0.0166  | 0.0471 | 0.7345 | 0.0110          | 0.0118   | 0.3842    | 4.0254  | 0.7768            | 99.8256  |
| CardioEmbolicStroke | class. Deltaproteobacteria. id. 3087 | MR Egger                  | 8    | -0.0199 | 0.1402 | 0.8916 | -0.0079         | 0.0194   | 0.6968    | 13.9138 | 0.0306            | 50.8143  |
| CardioEmbolicStroke | class. Deltaproteobacteria. id. 3087 | Weighted median           | 8    | -0.0690 | 0.0464 | 0.1376 | -0.0079         | 0.0194   | 0.6968    | 13.9138 | 0.0306            | 50.8143  |
| CardioEmbolicStroke | class. Deltaproteobacteria. id. 3087 | Inverse variance weighted | 8    | -0.0727 | 0.0515 | 0.1581 | -0.0079         | 0.0194   | 0.6968    | 13.9138 | 0.0306            | 50.8143  |
| CardioEmbolicStroke | class. Deltaproteobacteria. id. 3087 | Simple mode               | 8    | -0.0646 | 0.0830 | 0.4621 | -0.0079         | 0.0194   | 0.6968    | 13.9138 | 0.0306            | 50.8143  |
| CardioEmbolicStroke | class. Deltaproteobacteria. id. 3087 | Weighted mode             | 8    | -0.0738 | 0.0512 | 0.1922 | -0.0079         | 0.0194   | 0.6968    | 13.9138 | 0.0306            | 50.8143  |

|                     |                                     |                           |   |         |        |        |         |        |        |         |        |          |
|---------------------|-------------------------------------|---------------------------|---|---------|--------|--------|---------|--------|--------|---------|--------|----------|
| CardioEmbolicStroke | class.Erysipelotrichia. id. 2147    | MR Egger                  | 8 | 0.1891  | 0.0839 | 0.0651 | -0.0162 | 0.0116 | 0.2121 | 5.3006  | 0.6233 | 66.3092  |
| CardioEmbolicStroke | class.Erysipelotrichia. id. 2147    | Weighted median           | 8 | 0.0968  | 0.0425 | 0.0226 | -0.0162 | 0.0116 | 0.2121 | 5.3006  | 0.6233 | 66.3092  |
| CardioEmbolicStroke | class.Erysipelotrichia. id. 2147    | Inverse variance weighted | 8 | 0.0813  | 0.0329 | 0.0133 | -0.0162 | 0.0116 | 0.2121 | 5.3006  | 0.6233 | 66.3092  |
| CardioEmbolicStroke | class.Erysipelotrichia. id. 2147    | Simple mode               | 8 | 0.1363  | 0.0712 | 0.0970 | -0.0162 | 0.0116 | 0.2121 | 5.3006  | 0.6233 | 66.3092  |
| CardioEmbolicStroke | class.Erysipelotrichia. id. 2147    | Weighted mode             | 8 | 0.1142  | 0.0459 | 0.0416 | -0.0162 | 0.0116 | 0.2121 | 5.3006  | 0.6233 | 66.3092  |
| CardioEmbolicStroke | class.Gammaproteobacteria. id. 3303 | MR Egger                  | 8 | -0.1099 | 0.0893 | 0.2645 | 0.0140  | 0.0123 | 0.3006 | 6.0763  | 0.5309 | 97.1177  |
| CardioEmbolicStroke | class.Gammaproteobacteria. id. 3303 | Weighted median           | 8 | -0.0383 | 0.0445 | 0.3893 | 0.0140  | 0.0123 | 0.3006 | 6.0763  | 0.5309 | 97.1177  |
| CardioEmbolicStroke | class.Gammaproteobacteria. id. 3303 | Inverse variance weighted | 8 | -0.0168 | 0.0350 | 0.6304 | 0.0140  | 0.0123 | 0.3006 | 6.0763  | 0.5309 | 97.1177  |
| CardioEmbolicStroke | class.Gammaproteobacteria. id. 3303 | Simple mode               | 8 | -0.0582 | 0.0702 | 0.4346 | 0.0140  | 0.0123 | 0.3006 | 6.0763  | 0.5309 | 97.1177  |
| CardioEmbolicStroke | class.Gammaproteobacteria. id. 3303 | Weighted mode             | 8 | -0.0418 | 0.0464 | 0.3975 | 0.0140  | 0.0123 | 0.3006 | 6.0763  | 0.5309 | 97.1177  |
| CardioEmbolicStroke | class.Lentisphaeria. id. 2250       | MR Egger                  | 8 | 0.0375  | 0.2082 | 0.8630 | -0.0129 | 0.0289 | 0.6698 | 9.7327  | 0.1364 | 29.5089  |
| CardioEmbolicStroke | class.Lentisphaeria. id. 2250       | Weighted median           | 8 | -0.0376 | 0.0849 | 0.6578 | -0.0129 | 0.0289 | 0.6698 | 9.7327  | 0.1364 | 29.5089  |
| CardioEmbolicStroke | class.Lentisphaeria. id. 2250       | Inverse variance weighted | 8 | -0.0483 | 0.0770 | 0.5307 | -0.0129 | 0.0289 | 0.6698 | 9.7327  | 0.1364 | 29.5089  |
| CardioEmbolicStroke | class.Lentisphaeria. id. 2250       | Simple mode               | 8 | -0.0396 | 0.1350 | 0.7780 | -0.0129 | 0.0289 | 0.6698 | 9.7327  | 0.1364 | 29.5089  |
| CardioEmbolicStroke | class.Lentisphaeria. id. 2250       | Weighted mode             | 8 | -0.0336 | 0.0858 | 0.7070 | -0.0129 | 0.0289 | 0.6698 | 9.7327  | 0.1364 | 29.5089  |
| CardioEmbolicStroke | class.Melainabacteria. id. 1589     | MR Egger                  | 8 | -0.1643 | 0.1486 | 0.3114 | 0.0198  | 0.0205 | 0.3706 | 5.4634  | 0.6036 | 54.6951  |
| CardioEmbolicStroke | class.Melainabacteria. id. 1589     | Weighted median           | 8 | -0.0767 | 0.0744 | 0.3026 | 0.0198  | 0.0205 | 0.3706 | 5.4634  | 0.6036 | 54.6951  |
| CardioEmbolicStroke | class.Melainabacteria. id. 1589     | Inverse variance weighted | 8 | -0.0318 | 0.0580 | 0.5831 | 0.0198  | 0.0205 | 0.3706 | 5.4634  | 0.6036 | 54.6951  |
| CardioEmbolicStroke | class.Melainabacteria. id. 1589     | Simple mode               | 8 | -0.1179 | 0.1230 | 0.3698 | 0.0198  | 0.0205 | 0.3706 | 5.4634  | 0.6036 | 54.6951  |
| CardioEmbolicStroke | class.Melainabacteria. id. 1589     | Weighted mode             | 8 | -0.0910 | 0.0815 | 0.3014 | 0.0198  | 0.0205 | 0.3706 | 5.4634  | 0.6036 | 54.6951  |
| CardioEmbolicStroke | class.Methanobacteria. id. 119      | MR Egger                  | 8 | -0.0072 | 0.1860 | 0.9704 | 0.0001  | 0.0258 | 0.9959 | 3.6140  | 0.7287 | 52.6054  |
| CardioEmbolicStroke | class.Methanobacteria. id. 119      | Weighted median           | 8 | -0.0321 | 0.0898 | 0.7206 | 0.0001  | 0.0258 | 0.9959 | 3.6140  | 0.7287 | 52.6054  |
| CardioEmbolicStroke | class.Methanobacteria. id. 119      | Inverse variance weighted | 8 | -0.0063 | 0.0728 | 0.9314 | 0.0001  | 0.0258 | 0.9959 | 3.6140  | 0.7287 | 52.6054  |
| CardioEmbolicStroke | class.Methanobacteria. id. 119      | Simple mode               | 8 | -0.0918 | 0.1532 | 0.5677 | 0.0001  | 0.0258 | 0.9959 | 3.6140  | 0.7287 | 52.6054  |
| CardioEmbolicStroke | class.Methanobacteria. id. 119      | Weighted mode             | 8 | -0.0433 | 0.0981 | 0.6722 | 0.0001  | 0.0258 | 0.9959 | 3.6140  | 0.7287 | 52.6054  |
| CardioEmbolicStroke | class.Mollicutes. id. 3920          | MR Egger                  | 8 | 0.2636  | 0.1225 | 0.0748 | -0.0435 | 0.0169 | 0.0420 | 16.6829 | 0.0196 | 44.2489  |
| CardioEmbolicStroke | class.Mollicutes. id. 3920          | Weighted median           | 8 | 0.0277  | 0.0582 | 0.6346 | -0.0435 | 0.0169 | 0.0420 | 16.6829 | 0.0196 | 44.2489  |
| CardioEmbolicStroke | class.Mollicutes. id. 3920          | Inverse variance weighted | 8 | -0.0269 | 0.0643 | 0.6761 | -0.0435 | 0.0169 | 0.0420 | 16.6829 | 0.0196 | 44.2489  |
| CardioEmbolicStroke | class.Mollicutes. id. 3920          | Simple mode               | 8 | -0.1988 | 0.1429 | 0.2067 | -0.0435 | 0.0169 | 0.0420 | 16.6829 | 0.0196 | 44.2489  |
| CardioEmbolicStroke | class.Mollicutes. id. 3920          | Weighted mode             | 8 | 0.0641  | 0.0620 | 0.3358 | -0.0435 | 0.0169 | 0.0420 | 16.6829 | 0.0196 | 44.2489  |
| CardioEmbolicStroke | class.Negativicutes. id. 2164       | MR Egger                  | 8 | -0.0162 | 0.0840 | 0.8538 | -0.0022 | 0.0116 | 0.8540 | 4.3273  | 0.6325 | 99.6021  |
| CardioEmbolicStroke | class.Negativicutes. id. 2164       | Weighted median           | 8 | -0.0249 | 0.0426 | 0.5594 | -0.0022 | 0.0116 | 0.8540 | 4.3273  | 0.6325 | 99.6021  |
| CardioEmbolicStroke | class.Negativicutes. id. 2164       | Inverse variance weighted | 8 | -0.0310 | 0.0329 | 0.3457 | -0.0022 | 0.0116 | 0.8540 | 4.3273  | 0.6325 | 99.6021  |
| CardioEmbolicStroke | class.Negativicutes. id. 2164       | Simple mode               | 8 | -0.0885 | 0.0654 | 0.2185 | -0.0022 | 0.0116 | 0.8540 | 4.3273  | 0.6325 | 99.6021  |
| CardioEmbolicStroke | class.Negativicutes. id. 2164       | Weighted mode             | 8 | -0.0179 | 0.0476 | 0.7177 | -0.0022 | 0.0116 | 0.8540 | 4.3273  | 0.6325 | 99.6021  |
| CardioEmbolicStroke | class.Verrucomicrobiae. id. 4029    | MR Egger                  | 8 | -0.0239 | 0.1047 | 0.8272 | -0.0079 | 0.0144 | 0.6020 | 2.6247  | 0.8543 | 86.4625  |
| CardioEmbolicStroke | class.Verrucomicrobiae. id. 4029    | Weighted median           | 8 | -0.0553 | 0.0474 | 0.2433 | -0.0079 | 0.0144 | 0.6020 | 2.6247  | 0.8543 | 86.4625  |
| CardioEmbolicStroke | class.Verrucomicrobiae. id. 4029    | Inverse variance weighted | 8 | -0.0769 | 0.0409 | 0.0600 | -0.0079 | 0.0144 | 0.6020 | 2.6247  | 0.8543 | 86.4625  |
| CardioEmbolicStroke | class.Verrucomicrobiae. id. 4029    | Simple mode               | 8 | -0.0600 | 0.0788 | 0.4715 | -0.0079 | 0.0144 | 0.6020 | 2.6247  | 0.8543 | 86.4625  |
| CardioEmbolicStroke | class.Verrucomicrobiae. id. 4029    | Weighted mode             | 8 | -0.0571 | 0.0579 | 0.3568 | -0.0079 | 0.0144 | 0.6020 | 2.6247  | 0.8543 | 86.4625  |
| CardioEmbolicStroke | family.Acidaminococcaceae. id. 2166 | MR Egger                  | 8 | 0.0101  | 0.1576 | 0.9511 | -0.0103 | 0.0218 | 0.6526 | 14.6018 | 0.0236 | 37.7720  |
| CardioEmbolicStroke | family.Acidaminococcaceae. id. 2166 | Weighted median           | 8 | -0.0110 | 0.0501 | 0.8257 | -0.0103 | 0.0218 | 0.6526 | 14.6018 | 0.0236 | 37.7720  |
| CardioEmbolicStroke | family.Acidaminococcaceae. id. 2166 | Inverse variance weighted | 8 | -0.0586 | 0.0582 | 0.3143 | -0.0103 | 0.0218 | 0.6526 | 14.6018 | 0.0236 | 37.7720  |
| CardioEmbolicStroke | family.Acidaminococcaceae. id. 2166 | Simple mode               | 8 | 0.0032  | 0.0827 | 0.9705 | -0.0103 | 0.0218 | 0.6526 | 14.6018 | 0.0236 | 37.7720  |
| CardioEmbolicStroke | family.Acidaminococcaceae. id. 2166 | Weighted mode             | 8 | -0.0097 | 0.0532 | 0.8609 | -0.0103 | 0.0218 | 0.6526 | 14.6018 | 0.0236 | 37.7720  |
| CardioEmbolicStroke | family.Actinomycetaceae. id. 421    | MR Egger                  | 8 | 0.0484  | 0.1312 | 0.7247 | -0.0046 | 0.0180 | 0.8069 | 3.7038  | 0.7167 | 82.5103  |
| CardioEmbolicStroke | family.Actinomycetaceae. id. 421    | Weighted median           | 8 | 0.0272  | 0.0614 | 0.6577 | -0.0046 | 0.0180 | 0.8069 | 3.7038  | 0.7167 | 82.5103  |
| CardioEmbolicStroke | family.Actinomycetaceae. id. 421    | Inverse variance weighted | 8 | 0.0176  | 0.0510 | 0.7304 | -0.0046 | 0.0180 | 0.8069 | 3.7038  | 0.7167 | 82.5103  |
| CardioEmbolicStroke | family.Actinomycetaceae. id. 421    | Simple mode               | 8 | 0.1081  | 0.0968 | 0.3011 | -0.0046 | 0.0180 | 0.8069 | 3.7038  | 0.7167 | 82.5103  |
| CardioEmbolicStroke | family.Actinomycetaceae. id. 421    | Weighted mode             | 8 | 0.0301  | 0.0750 | 0.7004 | -0.0046 | 0.0180 | 0.8069 | 3.7038  | 0.7167 | 82.5103  |
| CardioEmbolicStroke | family.Alcaligenaceae. id. 2875     | MR Egger                  | 8 | -0.0890 | 0.0872 | 0.3471 | 0.0114  | 0.0121 | 0.3817 | 4.3550  | 0.7381 | 122.2306 |
| CardioEmbolicStroke | family.Alcaligenaceae. id. 2875     | Weighted median           | 8 | -0.0380 | 0.0424 | 0.3693 | 0.0114  | 0.0121 | 0.3817 | 4.3550  | 0.7381 | 122.2306 |
| CardioEmbolicStroke | family.Alcaligenaceae. id. 2875     | Inverse variance weighted | 8 | -0.0132 | 0.0342 | 0.6988 | 0.0114  | 0.0121 | 0.3817 | 4.3550  | 0.7381 | 122.2306 |
| CardioEmbolicStroke | family.Alcaligenaceae. id. 2875     | Simple mode               | 8 | -0.0290 | 0.0639 | 0.6642 | 0.0114  | 0.0121 | 0.3817 | 4.3550  | 0.7381 | 122.2306 |
| CardioEmbolicStroke | family.Alcaligenaceae. id. 2875     | Weighted mode             | 8 | -0.0360 | 0.0478 | 0.4761 | 0.0114  | 0.0121 | 0.3817 | 4.3550  | 0.7381 | 122.2306 |
| CardioEmbolicStroke | family.Bacteroidaceae. id. 917      | MR Egger                  | 8 | -0.1566 | 0.1007 | 0.1710 | 0.0184  | 0.0139 | 0.2344 | 11.2199 | 0.1293 | 71.4191  |
| CardioEmbolicStroke | family.Bacteroidaceae. id. 917      | Weighted median           | 8 | -0.0921 | 0.0425 | 0.0303 | 0.0184  | 0.0139 | 0.2344 | 11.2199 | 0.1293 | 71.4191  |
| CardioEmbolicStroke | family.Bacteroidaceae. id. 917      | Inverse variance weighted | 8 | -0.0341 | 0.0415 | 0.4110 | 0.0184  | 0.0139 | 0.2344 | 11.2199 | 0.1293 | 71.4191  |

|                     |                                                |                           |   |         |        |        |         |        |        |         |        |          |
|---------------------|------------------------------------------------|---------------------------|---|---------|--------|--------|---------|--------|--------|---------|--------|----------|
| CardioEmbolicStroke | family. Bacteroidaceae. id. 917                | Simple mode               | 8 | -0.0192 | 0.0832 | 0.8240 | 0.0184  | 0.0139 | 0.2344 | 11.2199 | 0.1293 | 71.4191  |
| CardioEmbolicStroke | family. Bacteroidaceae. id. 917                | Weighted mode             | 8 | -0.0945 | 0.0453 | 0.0753 | 0.0184  | 0.0139 | 0.2344 | 11.2199 | 0.1293 | 71.4191  |
| CardioEmbolicStroke | family. BacteroidalesS24. 7group. id. 11173    | MR Egger                  | 8 | -0.1298 | 0.1265 | 0.3443 | 0.0255  | 0.0175 | 0.1946 | 4.2145  | 0.7548 | 76.8119  |
| CardioEmbolicStroke | family. BacteroidalesS24. 7group. id. 11173    | Weighted median           | 8 | -0.0055 | 0.0651 | 0.9329 | 0.0255  | 0.0175 | 0.1946 | 4.2145  | 0.7548 | 76.8119  |
| CardioEmbolicStroke | family. BacteroidalesS24. 7group. id. 11173    | Inverse variance weighted | 8 | 0.0401  | 0.0495 | 0.4182 | 0.0255  | 0.0175 | 0.1946 | 4.2145  | 0.7548 | 76.8119  |
| CardioEmbolicStroke | family. BacteroidalesS24. 7group. id. 11173    | Simple mode               | 8 | 0.0177  | 0.1072 | 0.8733 | 0.0255  | 0.0175 | 0.1946 | 4.2145  | 0.7548 | 76.8119  |
| CardioEmbolicStroke | family. BacteroidalesS24. 7group. id. 11173    | Weighted mode             | 8 | -0.0232 | 0.0734 | 0.7612 | 0.0255  | 0.0175 | 0.1946 | 4.2145  | 0.7548 | 76.8119  |
| CardioEmbolicStroke | family. Bifidobacteriaceae. id. 433            | MR Egger                  | 8 | -0.0091 | 0.0927 | 0.9253 | 0.0056  | 0.0128 | 0.6776 | 3.7831  | 0.7060 | 111.9649 |
| CardioEmbolicStroke | family. Bifidobacteriaceae. id. 433            | Weighted median           | 8 | 0.0252  | 0.0449 | 0.5742 | 0.0056  | 0.0128 | 0.6776 | 3.7831  | 0.7060 | 111.9649 |
| CardioEmbolicStroke | family. Bifidobacteriaceae. id. 433            | Inverse variance weighted | 8 | 0.0282  | 0.0363 | 0.4373 | 0.0056  | 0.0128 | 0.6776 | 3.7831  | 0.7060 | 111.9649 |
| CardioEmbolicStroke | family. Bifidobacteriaceae. id. 433            | Simple mode               | 8 | 0.0728  | 0.0695 | 0.3300 | 0.0056  | 0.0128 | 0.6776 | 3.7831  | 0.7060 | 111.9649 |
| CardioEmbolicStroke | family. Bifidobacteriaceae. id. 433            | Weighted mode             | 8 | 0.0368  | 0.0488 | 0.4755 | 0.0056  | 0.0128 | 0.6776 | 3.7831  | 0.7060 | 111.9649 |
| CardioEmbolicStroke | family. Christensenellaceae. id. 1866          | MR Egger                  | 8 | -0.0588 | 0.1110 | 0.6153 | 0.0060  | 0.0153 | 0.7065 | 9.6652  | 0.1395 | 73.4990  |
| CardioEmbolicStroke | family. Christensenellaceae. id. 1866          | Weighted median           | 8 | -0.0055 | 0.0424 | 0.8964 | 0.0060  | 0.0153 | 0.7065 | 9.6652  | 0.1395 | 73.4990  |
| CardioEmbolicStroke | family. Christensenellaceae. id. 1866          | Inverse variance weighted | 8 | -0.0185 | 0.0407 | 0.6502 | 0.0060  | 0.0153 | 0.7065 | 9.6652  | 0.1395 | 73.4990  |
| CardioEmbolicStroke | family. Christensenellaceae. id. 1866          | Simple mode               | 8 | 0.0674  | 0.0828 | 0.4429 | 0.0060  | 0.0153 | 0.7065 | 9.6652  | 0.1395 | 73.4990  |
| CardioEmbolicStroke | family. Christensenellaceae. id. 1866          | Weighted mode             | 8 | 0.0022  | 0.0526 | 0.9671 | 0.0060  | 0.0153 | 0.7065 | 9.6652  | 0.1395 | 73.4990  |
| CardioEmbolicStroke | family. Clostridiaceae1. id. 1869              | MR Egger                  | 8 | 0.0513  | 0.1651 | 0.7666 | -0.0024 | 0.0228 | 0.9212 | 18.0860 | 0.0060 | 45.8399  |
| CardioEmbolicStroke | family. Clostridiaceae1. id. 1869              | Weighted median           | 8 | 0.0181  | 0.0486 | 0.7104 | -0.0024 | 0.0228 | 0.9212 | 18.0860 | 0.0060 | 45.8399  |
| CardioEmbolicStroke | family. Clostridiaceae1. id. 1869              | Inverse variance weighted | 8 | 0.0356  | 0.0598 | 0.5515 | -0.0024 | 0.0228 | 0.9212 | 18.0860 | 0.0060 | 45.8399  |
| CardioEmbolicStroke | family. Clostridiaceae1. id. 1869              | Simple mode               | 8 | -0.0069 | 0.1018 | 0.9478 | -0.0024 | 0.0228 | 0.9212 | 18.0860 | 0.0060 | 45.8399  |
| CardioEmbolicStroke | family. Clostridiaceae1. id. 1869              | Weighted mode             | 8 | 0.0139  | 0.0551 | 0.8083 | -0.0024 | 0.0228 | 0.9212 | 18.0860 | 0.0060 | 45.8399  |
| CardioEmbolicStroke | family. ClostridialesvadinBB60group. id. 11286 | MR Egger                  | 8 | 0.0497  | 0.1803 | 0.7921 | -0.0132 | 0.0249 | 0.6139 | 15.9814 | 0.0139 | 40.9028  |
| CardioEmbolicStroke | family. ClostridialesvadinBB60group. id. 11286 | Weighted median           | 8 | -0.0020 | 0.0547 | 0.9712 | -0.0132 | 0.0249 | 0.6139 | 15.9814 | 0.0139 | 40.9028  |
| CardioEmbolicStroke | family. ClostridialesvadinBB60group. id. 11286 | Inverse variance weighted | 8 | -0.0385 | 0.0669 | 0.5644 | -0.0132 | 0.0249 | 0.6139 | 15.9814 | 0.0139 | 40.9028  |
| CardioEmbolicStroke | family. ClostridialesvadinBB60group. id. 11286 | Simple mode               | 8 | -0.0759 | 0.1148 | 0.5300 | -0.0132 | 0.0249 | 0.6139 | 15.9814 | 0.0139 | 40.9028  |
| CardioEmbolicStroke | family. ClostridialesvadinBB60group. id. 11286 | Weighted mode             | 8 | 0.0089  | 0.0632 | 0.8923 | -0.0132 | 0.0249 | 0.6139 | 15.9814 | 0.0139 | 40.9028  |
| CardioEmbolicStroke | family. Coriobacteriaceae. id. 811             | MR Egger                  | 8 | -0.0266 | 0.0853 | 0.7659 | 0.0110  | 0.0118 | 0.3842 | 4.0254  | 0.7768 | 99.8256  |
| CardioEmbolicStroke | family. Coriobacteriaceae. id. 811             | Weighted median           | 8 | 0.0240  | 0.0414 | 0.5619 | 0.0110  | 0.0118 | 0.3842 | 4.0254  | 0.7768 | 99.8256  |
| CardioEmbolicStroke | family. Coriobacteriaceae. id. 811             | Inverse variance weighted | 8 | 0.0471  | 0.0334 | 0.1580 | 0.0110  | 0.0118 | 0.3842 | 4.0254  | 0.7768 | 99.8256  |
| CardioEmbolicStroke | family. Coriobacteriaceae. id. 811             | Simple mode               | 8 | 0.0405  | 0.0631 | 0.5416 | 0.0110  | 0.0118 | 0.3842 | 4.0254  | 0.7768 | 99.8256  |
| CardioEmbolicStroke | family. Coriobacteriaceae. id. 811             | Weighted mode             | 8 | 0.0166  | 0.0487 | 0.7430 | 0.0110  | 0.0118 | 0.3842 | 4.0254  | 0.7768 | 99.8256  |
| CardioEmbolicStroke | family. Defluviitaleaceae. id. 1924            | MR Egger                  | 8 | -0.1541 | 0.1726 | 0.4063 | 0.0121  | 0.0237 | 0.6275 | 11.1751 | 0.0831 | 35.6300  |
| CardioEmbolicStroke | family. Defluviitaleaceae. id. 1924            | Weighted median           | 8 | -0.0571 | 0.0609 | 0.3485 | 0.0121  | 0.0237 | 0.6275 | 11.1751 | 0.0831 | 35.6300  |
| CardioEmbolicStroke | family. Defluviitaleaceae. id. 1924            | Inverse variance weighted | 8 | -0.0729 | 0.0635 | 0.2515 | 0.0121  | 0.0237 | 0.6275 | 11.1751 | 0.0831 | 35.6300  |
| CardioEmbolicStroke | family. Defluviitaleaceae. id. 1924            | Simple mode               | 8 | -0.1931 | 0.1106 | 0.1243 | 0.0121  | 0.0237 | 0.6275 | 11.1751 | 0.0831 | 35.6300  |
| CardioEmbolicStroke | family. Defluviitaleaceae. id. 1924            | Weighted mode             | 8 | -0.0959 | 0.0735 | 0.2335 | 0.0121  | 0.0237 | 0.6275 | 11.1751 | 0.0831 | 35.6300  |
| CardioEmbolicStroke | family. Desulfovibrionaceae. id. 3169          | MR Egger                  | 8 | -0.0187 | 0.1410 | 0.8986 | -0.0080 | 0.0195 | 0.6940 | 14.0466 | 0.0291 | 50.5042  |
| CardioEmbolicStroke | family. Desulfovibrionaceae. id. 3169          | Weighted median           | 8 | -0.0694 | 0.0487 | 0.1541 | -0.0080 | 0.0195 | 0.6940 | 14.0466 | 0.0291 | 50.5042  |
| CardioEmbolicStroke | family. Desulfovibrionaceae. id. 3169          | Inverse variance weighted | 8 | -0.0723 | 0.0518 | 0.1627 | -0.0080 | 0.0195 | 0.6940 | 14.0466 | 0.0291 | 50.5042  |
| CardioEmbolicStroke | family. Desulfovibrionaceae. id. 3169          | Simple mode               | 8 | -0.0649 | 0.0845 | 0.4673 | -0.0080 | 0.0195 | 0.6940 | 14.0466 | 0.0291 | 50.5042  |
| CardioEmbolicStroke | family. Desulfovibrionaceae. id. 3169          | Weighted mode             | 8 | -0.0743 | 0.0502 | 0.1829 | -0.0080 | 0.0195 | 0.6940 | 14.0466 | 0.0291 | 50.5042  |
| CardioEmbolicStroke | family. Enterobacteriaceae. id. 3469           | MR Egger                  | 8 | -0.2045 | 0.0971 | 0.0799 | 0.0255  | 0.0134 | 0.1058 | 8.3208  | 0.3052 | 69.1885  |
| CardioEmbolicStroke | family. Enterobacteriaceae. id. 3469           | Weighted median           | 8 | -0.0775 | 0.0464 | 0.0946 | 0.0255  | 0.0134 | 0.1058 | 8.3208  | 0.3052 | 69.1885  |
| CardioEmbolicStroke | family. Enterobacteriaceae. id. 3469           | Inverse variance weighted | 8 | -0.0344 | 0.0414 | 0.4058 | 0.0255  | 0.0134 | 0.1058 | 8.3208  | 0.3052 | 69.1885  |
| CardioEmbolicStroke | family. Enterobacteriaceae. id. 3469           | Simple mode               | 8 | -0.0551 | 0.0778 | 0.5014 | 0.0255  | 0.0134 | 0.1058 | 8.3208  | 0.3052 | 69.1885  |
| CardioEmbolicStroke | family. Enterobacteriaceae. id. 3469           | Weighted mode             | 8 | -0.0762 | 0.0540 | 0.2013 | 0.0255  | 0.0134 | 0.1058 | 8.3208  | 0.3052 | 69.1885  |
| CardioEmbolicStroke | family. Erysipelotrichaceae. id. 2149          | MR Egger                  | 8 | 0.1891  | 0.0839 | 0.0651 | -0.0162 | 0.0116 | 0.2121 | 5.3006  | 0.6233 | 66.3092  |
| CardioEmbolicStroke | family. Erysipelotrichaceae. id. 2149          | Weighted median           | 8 | 0.0968  | 0.0427 | 0.0233 | -0.0162 | 0.0116 | 0.2121 | 5.3006  | 0.6233 | 66.3092  |
| CardioEmbolicStroke | family. Erysipelotrichaceae. id. 2149          | Inverse variance weighted | 8 | 0.0813  | 0.0329 | 0.0133 | -0.0162 | 0.0116 | 0.2121 | 5.3006  | 0.6233 | 66.3092  |
| CardioEmbolicStroke | family. Erysipelotrichaceae. id. 2149          | Simple mode               | 8 | 0.1363  | 0.0739 | 0.1076 | -0.0162 | 0.0116 | 0.2121 | 5.3006  | 0.6233 | 66.3092  |
| CardioEmbolicStroke | family. Erysipelotrichaceae. id. 2149          | Weighted mode             | 8 | 0.1142  | 0.0451 | 0.0391 | -0.0162 | 0.0116 | 0.2121 | 5.3006  | 0.6233 | 66.3092  |
| CardioEmbolicStroke | family. FamilyXL. id. 1936                     | MR Egger                  | 8 | -0.2234 | 0.2838 | 0.4611 | 0.0107  | 0.0394 | 0.7944 | 12.0669 | 0.0605 | 17.0097  |
| CardioEmbolicStroke | family. FamilyXL. id. 1936                     | Weighted median           | 8 | -0.2508 | 0.1050 | 0.0169 | 0.0107  | 0.0394 | 0.7944 | 12.0669 | 0.0605 | 17.0097  |
| CardioEmbolicStroke | family. FamilyXL. id. 1936                     | Inverse variance weighted | 8 | -0.1523 | 0.1038 | 0.1422 | 0.0107  | 0.0394 | 0.7944 | 12.0669 | 0.0605 | 17.0097  |
| CardioEmbolicStroke | family. FamilyXL. id. 1936                     | Simple mode               | 8 | -0.2633 | 0.1898 | 0.2079 | 0.0107  | 0.0394 | 0.7944 | 12.0669 | 0.0605 | 17.0097  |
| CardioEmbolicStroke | family. FamilyXL. id. 1936                     | Weighted mode             | 8 | -0.2800 | 0.1157 | 0.0461 | 0.0107  | 0.0394 | 0.7944 | 12.0669 | 0.0605 | 17.0097  |
| CardioEmbolicStroke | family. FamilyXIII. id. 1957                   | MR Egger                  | 8 | -0.1235 | 0.0881 | 0.2104 | 0.0134  | 0.0121 | 0.3126 | 4.1317  | 0.7645 | 122.9260 |

|                     |                                         |                           |   |         |        |        |         |        |        |         |        |          |
|---------------------|-----------------------------------------|---------------------------|---|---------|--------|--------|---------|--------|--------|---------|--------|----------|
| CardioEmbolicStroke | family. FamilyXIII. id. 1957            | Weighted median           | 8 | -0.0510 | 0.0430 | 0.2356 | 0.0134  | 0.0121 | 0.3126 | 4.1317  | 0.7645 | 122.9260 |
| CardioEmbolicStroke | family. FamilyXIII. id. 1957            | Inverse variance weighted | 8 | -0.0341 | 0.0344 | 0.3206 | 0.0134  | 0.0121 | 0.3126 | 4.1317  | 0.7645 | 122.9260 |
| CardioEmbolicStroke | family. FamilyXIII. id. 1957            | Simple mode               | 8 | -0.0312 | 0.0676 | 0.6584 | 0.0134  | 0.0121 | 0.3126 | 4.1317  | 0.7645 | 122.9260 |
| CardioEmbolicStroke | family. FamilyXIII. id. 1957            | Weighted mode             | 8 | -0.0627 | 0.0450 | 0.2066 | 0.0134  | 0.0121 | 0.3126 | 4.1317  | 0.7645 | 122.9260 |
| CardioEmbolicStroke | family. Lachnospiraceae. id. 1987       | MR Egger                  | 8 | 0.0393  | 0.0836 | 0.6547 | -0.0135 | 0.0115 | 0.2858 | 3.8605  | 0.7957 | 98.3739  |
| CardioEmbolicStroke | family. Lachnospiraceae. id. 1987       | Weighted median           | 8 | -0.0211 | 0.0420 | 0.6150 | -0.0135 | 0.0115 | 0.2858 | 3.8605  | 0.7957 | 98.3739  |
| CardioEmbolicStroke | family. Lachnospiraceae. id. 1987       | Inverse variance weighted | 8 | -0.0508 | 0.0327 | 0.1208 | -0.0135 | 0.0115 | 0.2858 | 3.8605  | 0.7957 | 98.3739  |
| CardioEmbolicStroke | family. Lachnospiraceae. id. 1987       | Simple mode               | 8 | -0.1315 | 0.0738 | 0.1180 | -0.0135 | 0.0115 | 0.2858 | 3.8605  | 0.7957 | 98.3739  |
| CardioEmbolicStroke | family. Lachnospiraceae. id. 1987       | Weighted mode             | 8 | -0.0073 | 0.0442 | 0.8739 | -0.0135 | 0.0115 | 0.2858 | 3.8605  | 0.7957 | 98.3739  |
| CardioEmbolicStroke | family. Lactobacillaceae. id. 1836      | MR Egger                  | 8 | -0.1129 | 0.2060 | 0.6033 | 0.0207  | 0.0284 | 0.4928 | 13.9570 | 0.0301 | 34.6485  |
| CardioEmbolicStroke | family. Lactobacillaceae. id. 1836      | Weighted median           | 8 | -0.0076 | 0.0655 | 0.9077 | 0.0207  | 0.0284 | 0.4928 | 13.9570 | 0.0301 | 34.6485  |
| CardioEmbolicStroke | family. Lactobacillaceae. id. 1836      | Inverse variance weighted | 8 | 0.0255  | 0.0777 | 0.7422 | 0.0207  | 0.0284 | 0.4928 | 13.9570 | 0.0301 | 34.6485  |
| CardioEmbolicStroke | family. Lactobacillaceae. id. 1836      | Simple mode               | 8 | -0.0511 | 0.1046 | 0.6401 | 0.0207  | 0.0284 | 0.4928 | 13.9570 | 0.0301 | 34.6485  |
| CardioEmbolicStroke | family. Lactobacillaceae. id. 1836      | Weighted mode             | 8 | -0.0089 | 0.0703 | 0.9026 | 0.0207  | 0.0284 | 0.4928 | 13.9570 | 0.0301 | 34.6485  |
| CardioEmbolicStroke | family. Methanobacteriaceae. id. 121    | MR Egger                  | 8 | -0.0072 | 0.1860 | 0.9704 | 0.0001  | 0.0258 | 0.9959 | 3.6140  | 0.7287 | 52.6054  |
| CardioEmbolicStroke | family. Methanobacteriaceae. id. 121    | Weighted median           | 8 | -0.0321 | 0.0900 | 0.7214 | 0.0001  | 0.0258 | 0.9959 | 3.6140  | 0.7287 | 52.6054  |
| CardioEmbolicStroke | family. Methanobacteriaceae. id. 121    | Inverse variance weighted | 8 | -0.0063 | 0.0728 | 0.9314 | 0.0001  | 0.0258 | 0.9959 | 3.6140  | 0.7287 | 52.6054  |
| CardioEmbolicStroke | family. Methanobacteriaceae. id. 121    | Simple mode               | 8 | -0.0918 | 0.1429 | 0.5408 | 0.0001  | 0.0258 | 0.9959 | 3.6140  | 0.7287 | 52.6054  |
| CardioEmbolicStroke | family. Methanobacteriaceae. id. 121    | Weighted mode             | 8 | -0.0433 | 0.1018 | 0.6833 | 0.0001  | 0.0258 | 0.9959 | 3.6140  | 0.7287 | 52.6054  |
| CardioEmbolicStroke | family. Oxalobacteraceae. id. 2966      | MR Egger                  | 8 | 0.2946  | 0.1735 | 0.1404 | -0.0365 | 0.0238 | 0.1764 | 9.8811  | 0.1954 | 32.1605  |
| CardioEmbolicStroke | family. Oxalobacteraceae. id. 2966      | Weighted median           | 8 | 0.1155  | 0.0795 | 0.1463 | -0.0365 | 0.0238 | 0.1764 | 9.8811  | 0.1954 | 32.1605  |
| CardioEmbolicStroke | family. Oxalobacteraceae. id. 2966      | Inverse variance weighted | 8 | 0.0497  | 0.0737 | 0.4997 | -0.0365 | 0.0238 | 0.1764 | 9.8811  | 0.1954 | 32.1605  |
| CardioEmbolicStroke | family. Oxalobacteraceae. id. 2966      | Simple mode               | 8 | 0.1282  | 0.1347 | 0.3730 | -0.0365 | 0.0238 | 0.1764 | 9.8811  | 0.1954 | 32.1605  |
| CardioEmbolicStroke | family. Oxalobacteraceae. id. 2966      | Weighted mode             | 8 | 0.1282  | 0.0907 | 0.2003 | -0.0365 | 0.0238 | 0.1764 | 9.8811  | 0.1954 | 32.1605  |
| CardioEmbolicStroke | family. Pasteurellaceae. id. 3689       | MR Egger                  | 8 | 0.1615  | 0.1220 | 0.2338 | -0.0131 | 0.0169 | 0.4661 | 6.6553  | 0.3539 | 49.5998  |
| CardioEmbolicStroke | family. Pasteurellaceae. id. 3689       | Weighted median           | 8 | 0.0987  | 0.0581 | 0.0893 | -0.0131 | 0.0169 | 0.4661 | 6.6553  | 0.3539 | 49.5998  |
| CardioEmbolicStroke | family. Pasteurellaceae. id. 3689       | Inverse variance weighted | 8 | 0.0742  | 0.0465 | 0.1107 | -0.0131 | 0.0169 | 0.4661 | 6.6553  | 0.3539 | 49.5998  |
| CardioEmbolicStroke | family. Pasteurellaceae. id. 3689       | Simple mode               | 8 | 0.0292  | 0.1078 | 0.7941 | -0.0131 | 0.0169 | 0.4661 | 6.6553  | 0.3539 | 49.5998  |
| CardioEmbolicStroke | family. Pasteurellaceae. id. 3689       | Weighted mode             | 8 | 0.0874  | 0.0645 | 0.2179 | -0.0131 | 0.0169 | 0.4661 | 6.6553  | 0.3539 | 49.5998  |
| CardioEmbolicStroke | family. Peptococcaceae. id. 2024        | MR Egger                  | 8 | -0.0689 | 0.1104 | 0.5559 | 0.0069  | 0.0152 | 0.6656 | 5.0859  | 0.5328 | 71.8008  |
| CardioEmbolicStroke | family. Peptococcaceae. id. 2024        | Weighted median           | 8 | -0.0217 | 0.0571 | 0.7032 | 0.0069  | 0.0152 | 0.6656 | 5.0859  | 0.5328 | 71.8008  |
| CardioEmbolicStroke | family. Peptococcaceae. id. 2024        | Inverse variance weighted | 8 | -0.0227 | 0.0430 | 0.5986 | 0.0069  | 0.0152 | 0.6656 | 5.0859  | 0.5328 | 71.8008  |
| CardioEmbolicStroke | family. Peptococcaceae. id. 2024        | Simple mode               | 8 | 0.0613  | 0.0836 | 0.4873 | 0.0069  | 0.0152 | 0.6656 | 5.0859  | 0.5328 | 71.8008  |
| CardioEmbolicStroke | family. Peptococcaceae. id. 2024        | Weighted mode             | 8 | -0.0265 | 0.0649 | 0.6955 | 0.0069  | 0.0152 | 0.6656 | 5.0859  | 0.5328 | 71.8008  |
| CardioEmbolicStroke | family. Peptostreptococcaceae. id. 2042 | MR Egger                  | 8 | 0.0690  | 0.0973 | 0.5049 | -0.0034 | 0.0134 | 0.8111 | 7.0918  | 0.3124 | 74.9029  |
| CardioEmbolicStroke | family. Peptostreptococcaceae. id. 2042 | Weighted median           | 8 | 0.0454  | 0.0440 | 0.3026 | -0.0034 | 0.0134 | 0.8111 | 7.0918  | 0.3124 | 74.9029  |
| CardioEmbolicStroke | family. Peptostreptococcaceae. id. 2042 | Inverse variance weighted | 8 | 0.0466  | 0.0354 | 0.1879 | -0.0034 | 0.0134 | 0.8111 | 7.0918  | 0.3124 | 74.9029  |
| CardioEmbolicStroke | family. Peptostreptococcaceae. id. 2042 | Simple mode               | 8 | 0.0372  | 0.0776 | 0.6464 | -0.0034 | 0.0134 | 0.8111 | 7.0918  | 0.3124 | 74.9029  |
| CardioEmbolicStroke | family. Peptostreptococcaceae. id. 2042 | Weighted mode             | 8 | 0.0474  | 0.0504 | 0.3779 | -0.0034 | 0.0134 | 0.8111 | 7.0918  | 0.3124 | 74.9029  |
| CardioEmbolicStroke | family. Porphyromonadaceae. id. 943     | MR Egger                  | 8 | -0.0495 | 0.0843 | 0.5784 | 0.0113  | 0.0116 | 0.3703 | 5.9778  | 0.4257 | 88.7277  |
| CardioEmbolicStroke | family. Porphyromonadaceae. id. 943     | Weighted median           | 8 | -0.0080 | 0.0422 | 0.8491 | 0.0113  | 0.0116 | 0.3703 | 5.9778  | 0.4257 | 88.7277  |
| CardioEmbolicStroke | family. Porphyromonadaceae. id. 943     | Inverse variance weighted | 8 | 0.0256  | 0.0330 | 0.4379 | 0.0113  | 0.0116 | 0.3703 | 5.9778  | 0.4257 | 88.7277  |
| CardioEmbolicStroke | family. Porphyromonadaceae. id. 943     | Simple mode               | 8 | -0.0146 | 0.0601 | 0.8157 | 0.0113  | 0.0116 | 0.3703 | 5.9778  | 0.4257 | 88.7277  |
| CardioEmbolicStroke | family. Porphyromonadaceae. id. 943     | Weighted mode             | 8 | -0.0094 | 0.0450 | 0.8408 | 0.0113  | 0.0116 | 0.3703 | 5.9778  | 0.4257 | 88.7277  |
| CardioEmbolicStroke | family. Prevotellaceae. id. 960         | MR Egger                  | 8 | 0.1907  | 0.0924 | 0.0847 | -0.0214 | 0.0128 | 0.1461 | 6.2281  | 0.5134 | 82.0663  |
| CardioEmbolicStroke | family. Prevotellaceae. id. 960         | Weighted median           | 8 | 0.0883  | 0.0447 | 0.0482 | -0.0214 | 0.0128 | 0.1461 | 6.2281  | 0.5134 | 82.0663  |
| CardioEmbolicStroke | family. Prevotellaceae. id. 960         | Inverse variance weighted | 8 | 0.0488  | 0.0362 | 0.1783 | -0.0214 | 0.0128 | 0.1461 | 6.2281  | 0.5134 | 82.0663  |
| CardioEmbolicStroke | family. Prevotellaceae. id. 960         | Simple mode               | 8 | 0.1032  | 0.0795 | 0.2354 | -0.0214 | 0.0128 | 0.1461 | 6.2281  | 0.5134 | 82.0663  |
| CardioEmbolicStroke | family. Prevotellaceae. id. 960         | Weighted mode             | 8 | 0.0977  | 0.0517 | 0.1004 | -0.0214 | 0.0128 | 0.1461 | 6.2281  | 0.5134 | 82.0663  |
| CardioEmbolicStroke | family. Rhodospirillaceae. id. 2717     | MR Egger                  | 8 | -0.1373 | 0.1240 | 0.3107 | 0.0057  | 0.0171 | 0.7487 | 4.7819  | 0.5721 | 50.5824  |
| CardioEmbolicStroke | family. Rhodospirillaceae. id. 2717     | Weighted median           | 8 | -0.1229 | 0.0623 | 0.0486 | 0.0057  | 0.0171 | 0.7487 | 4.7819  | 0.5721 | 50.5824  |
| CardioEmbolicStroke | family. Rhodospirillaceae. id. 2717     | Inverse variance weighted | 8 | -0.0990 | 0.0484 | 0.0408 | 0.0057  | 0.0171 | 0.7487 | 4.7819  | 0.5721 | 50.5824  |
| CardioEmbolicStroke | family. Rhodospirillaceae. id. 2717     | Simple mode               | 8 | -0.1543 | 0.1013 | 0.1715 | 0.0057  | 0.0171 | 0.7487 | 4.7819  | 0.5721 | 50.5824  |
| CardioEmbolicStroke | family. Rhodospirillaceae. id. 2717     | Weighted mode             | 8 | -0.1253 | 0.0663 | 0.1006 | 0.0057  | 0.0171 | 0.7487 | 4.7819  | 0.5721 | 50.5824  |
| CardioEmbolicStroke | family. Rikenellaceae. id. 967          | MR Egger                  | 8 | -0.1829 | 0.0853 | 0.0759 | 0.0200  | 0.0118 | 0.1412 | 4.3540  | 0.7382 | 101.7522 |
| CardioEmbolicStroke | family. Rikenellaceae. id. 967          | Weighted median           | 8 | -0.0466 | 0.0426 | 0.2739 | 0.0200  | 0.0118 | 0.1412 | 4.3540  | 0.7382 | 101.7522 |
| CardioEmbolicStroke | family. Rikenellaceae. id. 967          | Inverse variance weighted | 8 | -0.0498 | 0.0334 | 0.1358 | 0.0200  | 0.0118 | 0.1412 | 4.3540  | 0.7382 | 101.7522 |
| CardioEmbolicStroke | family. Rikenellaceae. id. 967          | Simple mode               | 8 | 0.0144  | 0.0763 | 0.8556 | 0.0200  | 0.0118 | 0.1412 | 4.3540  | 0.7382 | 101.7522 |

|                     |                                                     |                           |   |         |        |        |         |        |        |         |        |          |
|---------------------|-----------------------------------------------------|---------------------------|---|---------|--------|--------|---------|--------|--------|---------|--------|----------|
| CardioEmbolicStroke | family. Rikenellaceae. id. 967                      | Weighted mode             | 8 | -0.1010 | 0.0474 | 0.0706 | 0.0200  | 0.0118 | 0.1412 | 4.3540  | 0.7382 | 101.7522 |
| CardioEmbolicStroke | family. Ruminococcaceae. id. 2050                   | MR Egger                  | 8 | -0.0414 | 0.0836 | 0.6379 | 0.0004  | 0.0116 | 0.9732 | 4.7944  | 0.5704 | 93.2739  |
| CardioEmbolicStroke | family. Ruminococcaceae. id. 2050                   | Weighted median           | 8 | -0.0341 | 0.0417 | 0.4140 | 0.0004  | 0.0116 | 0.9732 | 4.7944  | 0.5704 | 93.2739  |
| CardioEmbolicStroke | family. Ruminococcaceae. id. 2050                   | Inverse variance weighted | 8 | -0.0387 | 0.0327 | 0.2368 | 0.0004  | 0.0116 | 0.9732 | 4.7944  | 0.5704 | 93.2739  |
| CardioEmbolicStroke | family. Ruminococcaceae. id. 2050                   | Simple mode               | 8 | -0.0287 | 0.0692 | 0.6906 | 0.0004  | 0.0116 | 0.9732 | 4.7944  | 0.5704 | 93.2739  |
| CardioEmbolicStroke | family. Ruminococcaceae. id. 2050                   | Weighted mode             | 8 | -0.0331 | 0.0442 | 0.4776 | 0.0004  | 0.0116 | 0.9732 | 4.7944  | 0.5704 | 93.2739  |
| CardioEmbolicStroke | family. Streptococcaceae. id. 1850                  | MR Egger                  | 8 | 0.1454  | 0.0972 | 0.1853 | -0.0165 | 0.0134 | 0.2656 | 9.1333  | 0.2432 | 69.7190  |
| CardioEmbolicStroke | family. Streptococcaceae. id. 1850                  | Weighted median           | 8 | 0.0672  | 0.0433 | 0.1204 | -0.0165 | 0.0134 | 0.2656 | 9.1333  | 0.2432 | 69.7190  |
| CardioEmbolicStroke | family. Streptococcaceae. id. 1850                  | Inverse variance weighted | 8 | 0.0356  | 0.0393 | 0.3658 | -0.0165 | 0.0134 | 0.2656 | 9.1333  | 0.2432 | 69.7190  |
| CardioEmbolicStroke | family. Streptococcaceae. id. 1850                  | Simple mode               | 8 | 0.0644  | 0.0647 | 0.3524 | -0.0165 | 0.0134 | 0.2656 | 9.1333  | 0.2432 | 69.7190  |
| CardioEmbolicStroke | family. Streptococcaceae. id. 1850                  | Weighted mode             | 8 | 0.0691  | 0.0444 | 0.1638 | -0.0165 | 0.0134 | 0.2656 | 9.1333  | 0.2432 | 69.7190  |
| CardioEmbolicStroke | family. Veillonellaceae. id. 2172                   | MR Egger                  | 8 | -0.0855 | 0.1175 | 0.4940 | 0.0072  | 0.0162 | 0.6739 | 10.3546 | 0.1105 | 71.5946  |
| CardioEmbolicStroke | family. Veillonellaceae. id. 2172                   | Weighted median           | 8 | -0.0790 | 0.0456 | 0.0832 | 0.0072  | 0.0162 | 0.6739 | 10.3546 | 0.1105 | 71.5946  |
| CardioEmbolicStroke | family. Veillonellaceae. id. 2172                   | Inverse variance weighted | 8 | -0.0377 | 0.0433 | 0.3833 | 0.0072  | 0.0162 | 0.6739 | 10.3546 | 0.1105 | 71.5946  |
| CardioEmbolicStroke | family. Veillonellaceae. id. 2172                   | Simple mode               | 8 | -0.0635 | 0.0842 | 0.4748 | 0.0072  | 0.0162 | 0.6739 | 10.3546 | 0.1105 | 71.5946  |
| CardioEmbolicStroke | family. Veillonellaceae. id. 2172                   | Weighted mode             | 8 | -0.0782 | 0.0502 | 0.1632 | 0.0072  | 0.0162 | 0.6739 | 10.3546 | 0.1105 | 71.5946  |
| CardioEmbolicStroke | family. Verrucomicrobiaceae. id. 4036               | MR Egger                  | 8 | -0.0237 | 0.1047 | 0.8287 | -0.0080 | 0.0144 | 0.5994 | 2.6009  | 0.8570 | 86.4261  |
| CardioEmbolicStroke | family. Verrucomicrobiaceae. id. 4036               | Weighted median           | 8 | -0.0558 | 0.0509 | 0.2726 | -0.0080 | 0.0144 | 0.5994 | 2.6009  | 0.8570 | 86.4261  |
| CardioEmbolicStroke | family. Verrucomicrobiaceae. id. 4036               | Inverse variance weighted | 8 | -0.0771 | 0.0409 | 0.0594 | -0.0080 | 0.0144 | 0.5994 | 2.6009  | 0.8570 | 86.4261  |
| CardioEmbolicStroke | family. Verrucomicrobiaceae. id. 4036               | Simple mode               | 8 | -0.0616 | 0.0765 | 0.4473 | -0.0080 | 0.0144 | 0.5994 | 2.6009  | 0.8570 | 86.4261  |
| CardioEmbolicStroke | family. Verrucomicrobiaceae. id. 4036               | Weighted mode             | 8 | -0.0569 | 0.0598 | 0.3729 | -0.0080 | 0.0144 | 0.5994 | 2.6009  | 0.8570 | 86.4261  |
| CardioEmbolicStroke | family. Victivallaceae. id. 2255                    | MR Egger                  | 8 | 0.0193  | 0.1800 | 0.9181 | -0.0034 | 0.0250 | 0.8947 | 4.3521  | 0.6291 | 44.7368  |
| CardioEmbolicStroke | family. Victivallaceae. id. 2255                    | Weighted median           | 8 | -0.0072 | 0.0901 | 0.9366 | -0.0034 | 0.0250 | 0.8947 | 4.3521  | 0.6291 | 44.7368  |
| CardioEmbolicStroke | family. Victivallaceae. id. 2255                    | Inverse variance weighted | 8 | -0.0036 | 0.0707 | 0.9599 | -0.0034 | 0.0250 | 0.8947 | 4.3521  | 0.6291 | 44.7368  |
| CardioEmbolicStroke | family. Victivallaceae. id. 2255                    | Simple mode               | 8 | -0.0077 | 0.1308 | 0.9548 | -0.0034 | 0.0250 | 0.8947 | 4.3521  | 0.6291 | 44.7368  |
| CardioEmbolicStroke | family. Victivallaceae. id. 2255                    | Weighted mode             | 8 | -0.0058 | 0.1013 | 0.9563 | -0.0034 | 0.0250 | 0.8947 | 4.3521  | 0.6291 | 44.7368  |
| CardioEmbolicStroke | family. unknownfamily. id. 1000001214               | MR Egger                  | 8 | -0.1722 | 0.1488 | 0.2909 | 0.0210  | 0.0205 | 0.3454 | 5.5436  | 0.5939 | 54.3776  |
| CardioEmbolicStroke | family. unknownfamily. id. 1000001214               | Weighted median           | 8 | -0.0795 | 0.0755 | 0.2922 | 0.0210  | 0.0205 | 0.3454 | 5.5436  | 0.5939 | 54.3776  |
| CardioEmbolicStroke | family. unknownfamily. id. 1000001214               | Inverse variance weighted | 8 | -0.0320 | 0.0580 | 0.5812 | 0.0210  | 0.0205 | 0.3454 | 5.5436  | 0.5939 | 54.3776  |
| CardioEmbolicStroke | family. unknownfamily. id. 1000001214               | Simple mode               | 8 | -0.1177 | 0.1117 | 0.3271 | 0.0210  | 0.0205 | 0.3454 | 5.5436  | 0.5939 | 54.3776  |
| CardioEmbolicStroke | family. unknownfamily. id. 1000001214               | Weighted mode             | 8 | -0.0935 | 0.0790 | 0.2751 | 0.0210  | 0.0205 | 0.3454 | 5.5436  | 0.5939 | 54.3776  |
| CardioEmbolicStroke | family. unknownfamily. id. 1000005471               | MR Egger                  | 8 | 0.3103  | 0.1297 | 0.0539 | -0.0447 | 0.0179 | 0.0466 | 16.4835 | 0.0210 | 40.2178  |
| CardioEmbolicStroke | family. unknownfamily. id. 1000005471               | Weighted median           | 8 | 0.0528  | 0.0625 | 0.3977 | -0.0447 | 0.0179 | 0.0466 | 16.4835 | 0.0210 | 40.2178  |
| CardioEmbolicStroke | family. unknownfamily. id. 1000005471               | Inverse variance weighted | 8 | 0.0118  | 0.0670 | 0.8604 | -0.0447 | 0.0179 | 0.0466 | 16.4835 | 0.0210 | 40.2178  |
| CardioEmbolicStroke | family. unknownfamily. id. 1000005471               | Simple mode               | 8 | -0.1614 | 0.1442 | 0.3000 | -0.0447 | 0.0179 | 0.0466 | 16.4835 | 0.0210 | 40.2178  |
| CardioEmbolicStroke | family. unknownfamily. id. 1000005471               | Weighted mode             | 8 | -0.0896 | 0.0671 | 0.2238 | -0.0447 | 0.0179 | 0.0466 | 16.4835 | 0.0210 | 40.2178  |
| CardioEmbolicStroke | family. unknownfamily. id. 1000006161               | MR Egger                  | 8 | 0.0929  | 0.1592 | 0.5808 | -0.0200 | 0.0220 | 0.3971 | 5.6481  | 0.4637 | 47.7274  |
| CardioEmbolicStroke | family. unknownfamily. id. 1000006161               | Weighted median           | 8 | -0.0151 | 0.0795 | 0.8494 | -0.0200 | 0.0220 | 0.3971 | 5.6481  | 0.4637 | 47.7274  |
| CardioEmbolicStroke | family. unknownfamily. id. 1000006161               | Inverse variance weighted | 8 | -0.0407 | 0.0622 | 0.5130 | -0.0200 | 0.0220 | 0.3971 | 5.6481  | 0.4637 | 47.7274  |
| CardioEmbolicStroke | family. unknownfamily. id. 1000006161               | Simple mode               | 8 | -0.0916 | 0.1284 | 0.4988 | -0.0200 | 0.0220 | 0.3971 | 5.6481  | 0.4637 | 47.7274  |
| CardioEmbolicStroke | family. unknownfamily. id. 1000006161               | Weighted mode             | 8 | -0.0098 | 0.0835 | 0.9098 | -0.0200 | 0.0220 | 0.3971 | 5.6481  | 0.4637 | 47.7274  |
| CardioEmbolicStroke | genus. Clostridiuminnocuungroup. id. 14397          | MR Egger                  | 8 | 0.2973  | 0.1754 | 0.1410 | -0.0360 | 0.0242 | 0.1874 | 4.0520  | 0.7738 | 54.3350  |
| CardioEmbolicStroke | genus. Clostridiuminnocuungroup. id. 14397          | Weighted median           | 8 | 0.0942  | 0.0848 | 0.2668 | -0.0360 | 0.0242 | 0.1874 | 4.0520  | 0.7738 | 54.3350  |
| CardioEmbolicStroke | genus. Clostridiuminnocuungroup. id. 14397          | Inverse variance weighted | 8 | 0.0571  | 0.0686 | 0.4048 | -0.0360 | 0.0242 | 0.1874 | 4.0520  | 0.7738 | 54.3350  |
| CardioEmbolicStroke | genus. Clostridiuminnocuungroup. id. 14397          | Simple mode               | 8 | 0.0259  | 0.1478 | 0.8657 | -0.0360 | 0.0242 | 0.1874 | 4.0520  | 0.7738 | 54.3350  |
| CardioEmbolicStroke | genus. Clostridiuminnocuungroup. id. 14397          | Weighted mode             | 8 | 0.1468  | 0.0910 | 0.1507 | -0.0360 | 0.0242 | 0.1874 | 4.0520  | 0.7738 | 54.3350  |
| CardioEmbolicStroke | genus. Eubacteriumbrachygroup. id. 11296            | MR Egger                  | 8 | -0.7907 | 0.1806 | 0.0047 | 0.1124  | 0.0249 | 0.0040 | 24.5426 | 0.0009 | 14.7668  |
| CardioEmbolicStroke | genus. Eubacteriumbrachygroup. id. 11296            | Weighted median           | 8 | -0.1142 | 0.1210 | 0.3453 | 0.1124  | 0.0249 | 0.0040 | 24.5426 | 0.0009 | 14.7668  |
| CardioEmbolicStroke | genus. Eubacteriumbrachygroup. id. 11296            | Inverse variance weighted | 8 | -0.0390 | 0.1318 | 0.7672 | 0.1124  | 0.0249 | 0.0040 | 24.5426 | 0.0009 | 14.7668  |
| CardioEmbolicStroke | genus. Eubacteriumbrachygroup. id. 11296            | Simple mode               | 8 | 0.4466  | 0.3013 | 0.1818 | 0.1124  | 0.0249 | 0.0040 | 24.5426 | 0.0009 | 14.7668  |
| CardioEmbolicStroke | genus. Eubacteriumbrachygroup. id. 11296            | Weighted mode             | 8 | -0.2746 | 0.0989 | 0.0275 | 0.1124  | 0.0249 | 0.0040 | 24.5426 | 0.0009 | 14.7668  |
| CardioEmbolicStroke | genus. Eubacteriumcoprostanoligenesgroup. id. 11375 | MR Egger                  | 8 | 0.0052  | 0.0860 | 0.9535 | -0.0008 | 0.0119 | 0.9490 | 3.6205  | 0.7279 | 152.2539 |
| CardioEmbolicStroke | genus. Eubacteriumcoprostanoligenesgroup. id. 11375 | Weighted median           | 8 | 0.0073  | 0.0429 | 0.8645 | -0.0008 | 0.0119 | 0.9490 | 3.6205  | 0.7279 | 152.2539 |
| CardioEmbolicStroke | genus. Eubacteriumcoprostanoligenesgroup. id. 11375 | Inverse variance weighted | 8 | -0.0001 | 0.0337 | 0.9988 | -0.0008 | 0.0119 | 0.9490 | 3.6205  | 0.7279 | 152.2539 |
| CardioEmbolicStroke | genus. Eubacteriumcoprostanoligenesgroup. id. 11375 | Simple mode               | 8 | 0.0208  | 0.0631 | 0.7514 | -0.0008 | 0.0119 | 0.9490 | 3.6205  | 0.7279 | 152.2539 |
| CardioEmbolicStroke | genus. Eubacteriumcoprostanoligenesgroup. id. 11375 | Weighted mode             | 8 | 0.0097  | 0.0463 | 0.8397 | -0.0008 | 0.0119 | 0.9490 | 3.6205  | 0.7279 | 152.2539 |
| CardioEmbolicStroke | genus. Eubacteriumeligensgroup. id. 14372           | MR Egger                  | 8 | 0.0473  | 0.1046 | 0.6672 | -0.0195 | 0.0145 | 0.2255 | 9.8822  | 0.1953 | 51.0244  |
| CardioEmbolicStroke | genus. Eubacteriumeligensgroup. id. 14372           | Weighted median           | 8 | -0.0282 | 0.0471 | 0.5490 | -0.0195 | 0.0145 | 0.2255 | 9.8822  | 0.1953 | 51.0244  |

|                     |                                                 |                           |   |         |        |        |         |        |        |         |        |          |
|---------------------|-------------------------------------------------|---------------------------|---|---------|--------|--------|---------|--------|--------|---------|--------|----------|
| CardioEmbolicStroke | genus..Eubacteriumeligensgroup. id. 14372       | Inverse variance weighted | 8 | -0.0827 | 0.0433 | 0.0561 | -0.0195 | 0.0145 | 0.2255 | 9.8822  | 0.1953 | 51.0244  |
| CardioEmbolicStroke | genus..Eubacteriumeligensgroup. id. 14372       | Simple mode               | 8 | -0.0115 | 0.0775 | 0.8858 | -0.0195 | 0.0145 | 0.2255 | 9.8822  | 0.1953 | 51.0244  |
| CardioEmbolicStroke | genus..Eubacteriumeligensgroup. id. 14372       | Weighted mode             | 8 | -0.0204 | 0.0487 | 0.6881 | -0.0195 | 0.0145 | 0.2255 | 9.8822  | 0.1953 | 51.0244  |
| CardioEmbolicStroke | genus..Eubacteriumfissicatenagroup. id. 14373   | MR Egger                  | 8 | -0.1597 | 0.1869 | 0.4258 | 0.0178  | 0.0259 | 0.5178 | 6.3557  | 0.3845 | 31.5481  |
| CardioEmbolicStroke | genus..Eubacteriumfissicatenagroup. id. 14373   | Weighted median           | 8 | -0.0571 | 0.0865 | 0.5089 | 0.0178  | 0.0259 | 0.5178 | 6.3557  | 0.3845 | 31.5481  |
| CardioEmbolicStroke | genus..Eubacteriumfissicatenagroup. id. 14373   | Inverse variance weighted | 8 | -0.0415 | 0.0712 | 0.5596 | 0.0178  | 0.0259 | 0.5178 | 6.3557  | 0.3845 | 31.5481  |
| CardioEmbolicStroke | genus..Eubacteriumfissicatenagroup. id. 14373   | Simple mode               | 8 | -0.2077 | 0.1560 | 0.2246 | 0.0178  | 0.0259 | 0.5178 | 6.3557  | 0.3845 | 31.5481  |
| CardioEmbolicStroke | genus..Eubacteriumfissicatenagroup. id. 14373   | Weighted mode             | 8 | -0.0784 | 0.0992 | 0.4551 | 0.0178  | 0.0259 | 0.5178 | 6.3557  | 0.3845 | 31.5481  |
| CardioEmbolicStroke | genus..Eubacteriumhalliigroup. id. 11338        | MR Egger                  | 8 | 0.0092  | 0.0881 | 0.9201 | -0.0073 | 0.0122 | 0.5706 | 3.9284  | 0.6864 | 96.0208  |
| CardioEmbolicStroke | genus..Eubacteriumhalliigroup. id. 11338        | Weighted median           | 8 | -0.0161 | 0.0432 | 0.7089 | -0.0073 | 0.0122 | 0.5706 | 3.9284  | 0.6864 | 96.0208  |
| CardioEmbolicStroke | genus..Eubacteriumhalliigroup. id. 11338        | Inverse variance weighted | 8 | -0.0394 | 0.0345 | 0.2529 | -0.0073 | 0.0122 | 0.5706 | 3.9284  | 0.6864 | 96.0208  |
| CardioEmbolicStroke | genus..Eubacteriumhalliigroup. id. 11338        | Simple mode               | 8 | -0.0049 | 0.0656 | 0.9421 | -0.0073 | 0.0122 | 0.5706 | 3.9284  | 0.6864 | 96.0208  |
| CardioEmbolicStroke | genus..Eubacteriumhalliigroup. id. 11338        | Weighted mode             | 8 | -0.0110 | 0.0478 | 0.8248 | -0.0073 | 0.0122 | 0.5706 | 3.9284  | 0.6864 | 96.0208  |
| CardioEmbolicStroke | genus..Eubacteriumnodatumgroup. id. 11297       | MR Egger                  | 8 | -0.1489 | 0.3095 | 0.6474 | 0.0261  | 0.0426 | 0.5626 | 14.5732 | 0.0238 | 15.4873  |
| CardioEmbolicStroke | genus..Eubacteriumnodatumgroup. id. 11297       | Weighted median           | 8 | -0.0981 | 0.1036 | 0.3438 | 0.0261  | 0.0426 | 0.5626 | 14.5732 | 0.0238 | 15.4873  |
| CardioEmbolicStroke | genus..Eubacteriumnodatumgroup. id. 11297       | Inverse variance weighted | 8 | 0.0256  | 0.1152 | 0.8239 | 0.0261  | 0.0426 | 0.5626 | 14.5732 | 0.0238 | 15.4873  |
| CardioEmbolicStroke | genus..Eubacteriumnodatumgroup. id. 11297       | Simple mode               | 8 | -0.1683 | 0.1810 | 0.3835 | 0.0261  | 0.0426 | 0.5626 | 14.5732 | 0.0238 | 15.4873  |
| CardioEmbolicStroke | genus..Eubacteriumnodatumgroup. id. 11297       | Weighted mode             | 8 | -0.1353 | 0.1119 | 0.2657 | 0.0261  | 0.0426 | 0.5626 | 14.5732 | 0.0238 | 15.4873  |
| CardioEmbolicStroke | genus..Eubacteriumoxidoreducensgroup. id. 11339 | MR Egger                  | 8 | 0.0003  | 0.1525 | 0.9987 | -0.0005 | 0.0211 | 0.9806 | 5.0009  | 0.5437 | 61.6641  |
| CardioEmbolicStroke | genus..Eubacteriumoxidoreducensgroup. id. 11339 | Weighted median           | 8 | -0.0069 | 0.0744 | 0.9265 | -0.0005 | 0.0211 | 0.9806 | 5.0009  | 0.5437 | 61.6641  |
| CardioEmbolicStroke | genus..Eubacteriumoxidoreducensgroup. id. 11339 | Inverse variance weighted | 8 | -0.0033 | 0.0598 | 0.9561 | -0.0005 | 0.0211 | 0.9806 | 5.0009  | 0.5437 | 61.6641  |
| CardioEmbolicStroke | genus..Eubacteriumoxidoreducensgroup. id. 11339 | Simple mode               | 8 | 0.0103  | 0.1084 | 0.9268 | -0.0005 | 0.0211 | 0.9806 | 5.0009  | 0.5437 | 61.6641  |
| CardioEmbolicStroke | genus..Eubacteriumoxidoreducensgroup. id. 11339 | Weighted mode             | 8 | -0.0047 | 0.0793 | 0.9543 | -0.0005 | 0.0211 | 0.9806 | 5.0009  | 0.5437 | 61.6641  |
| CardioEmbolicStroke | genus..Eubacteriumrectalegroup. id. 14374       | MR Egger                  | 8 | 0.0295  | 0.0860 | 0.7433 | -0.0014 | 0.0119 | 0.9105 | 4.9179  | 0.5544 | 106.0036 |
| CardioEmbolicStroke | genus..Eubacteriumrectalegroup. id. 14374       | Weighted median           | 8 | 0.0176  | 0.0431 | 0.6835 | -0.0014 | 0.0119 | 0.9105 | 4.9179  | 0.5544 | 106.0036 |
| CardioEmbolicStroke | genus..Eubacteriumrectalegroup. id. 14374       | Inverse variance weighted | 8 | 0.0202  | 0.0337 | 0.5480 | -0.0014 | 0.0119 | 0.9105 | 4.9179  | 0.5544 | 106.0036 |
| CardioEmbolicStroke | genus..Eubacteriumrectalegroup. id. 14374       | Simple mode               | 8 | -0.0161 | 0.0687 | 0.8216 | -0.0014 | 0.0119 | 0.9105 | 4.9179  | 0.5544 | 106.0036 |
| CardioEmbolicStroke | genus..Eubacteriumrectalegroup. id. 14374       | Weighted mode             | 8 | 0.0164  | 0.0497 | 0.7519 | -0.0014 | 0.0119 | 0.9105 | 4.9179  | 0.5544 | 106.0036 |
| CardioEmbolicStroke | genus..Eubacteriumruminantiumgroup. id. 11340   | MR Egger                  | 8 | 0.0314  | 0.2155 | 0.8890 | -0.0112 | 0.0298 | 0.7208 | 16.9728 | 0.0094 | 33.6588  |
| CardioEmbolicStroke | genus..Eubacteriumruminantiumgroup. id. 11340   | Weighted median           | 8 | -0.0684 | 0.0632 | 0.2794 | -0.0112 | 0.0298 | 0.7208 | 16.9728 | 0.0094 | 33.6588  |
| CardioEmbolicStroke | genus..Eubacteriumruminantiumgroup. id. 11340   | Inverse variance weighted | 8 | -0.0429 | 0.0791 | 0.5874 | -0.0112 | 0.0298 | 0.7208 | 16.9728 | 0.0094 | 33.6588  |
| CardioEmbolicStroke | genus..Eubacteriumruminantiumgroup. id. 11340   | Simple mode               | 8 | -0.0906 | 0.1190 | 0.4711 | -0.0112 | 0.0298 | 0.7208 | 16.9728 | 0.0094 | 33.6588  |
| CardioEmbolicStroke | genus..Eubacteriumruminantiumgroup. id. 11340   | Weighted mode             | 8 | -0.0728 | 0.0709 | 0.3391 | -0.0112 | 0.0298 | 0.7208 | 16.9728 | 0.0094 | 33.6588  |
| CardioEmbolicStroke | genus..Eubacteriumventriosumgroup. id. 11341    | MR Egger                  | 8 | -0.0330 | 0.0920 | 0.7317 | 0.0005  | 0.0127 | 0.9673 | 4.6434  | 0.5903 | 109.4053 |
| CardioEmbolicStroke | genus..Eubacteriumventriosumgroup. id. 11341    | Weighted median           | 8 | -0.0276 | 0.0469 | 0.5557 | 0.0005  | 0.0127 | 0.9673 | 4.6434  | 0.5903 | 109.4053 |
| CardioEmbolicStroke | genus..Eubacteriumventriosumgroup. id. 11341    | Inverse variance weighted | 8 | -0.0294 | 0.0359 | 0.4127 | 0.0005  | 0.0127 | 0.9673 | 4.6434  | 0.5903 | 109.4053 |
| CardioEmbolicStroke | genus..Eubacteriumventriosumgroup. id. 11341    | Simple mode               | 8 | 0.0370  | 0.0697 | 0.6117 | 0.0005  | 0.0127 | 0.9673 | 4.6434  | 0.5903 | 109.4053 |
| CardioEmbolicStroke | genus..Eubacteriumventriosumgroup. id. 11341    | Weighted mode             | 8 | -0.0380 | 0.0524 | 0.4925 | 0.0005  | 0.0127 | 0.9673 | 4.6434  | 0.5903 | 109.4053 |
| CardioEmbolicStroke | genus..Eubacteriumxylanophilumgroup. id. 14375  | MR Egger                  | 8 | -0.1293 | 0.1173 | 0.3125 | 0.0068  | 0.0161 | 0.6879 | 8.4251  | 0.2086 | 48.3408  |
| CardioEmbolicStroke | genus..Eubacteriumxylanophilumgroup. id. 14375  | Weighted median           | 8 | -0.0938 | 0.0488 | 0.0545 | 0.0068  | 0.0161 | 0.6879 | 8.4251  | 0.2086 | 48.3408  |
| CardioEmbolicStroke | genus..Eubacteriumxylanophilumgroup. id. 14375  | Inverse variance weighted | 8 | -0.0838 | 0.0430 | 0.0513 | 0.0068  | 0.0161 | 0.6879 | 8.4251  | 0.2086 | 48.3408  |
| CardioEmbolicStroke | genus..Eubacteriumxylanophilumgroup. id. 14375  | Simple mode               | 8 | -0.0710 | 0.0730 | 0.3629 | 0.0068  | 0.0161 | 0.6879 | 8.4251  | 0.2086 | 48.3408  |
| CardioEmbolicStroke | genus..Eubacteriumxylanophilumgroup. id. 14375  | Weighted mode             | 8 | -0.0908 | 0.0548 | 0.1414 | 0.0068  | 0.0161 | 0.6879 | 8.4251  | 0.2086 | 48.3408  |
| CardioEmbolicStroke | genus..Ruminococcusgavvreauiigroup. id. 11342   | MR Egger                  | 8 | 0.1254  | 0.1125 | 0.3074 | -0.0251 | 0.0155 | 0.1573 | 11.2986 | 0.1261 | 48.5399  |
| CardioEmbolicStroke | genus..Ruminococcusgavvreauiigroup. id. 11342   | Weighted median           | 8 | 0.0629  | 0.0566 | 0.2664 | -0.0251 | 0.0155 | 0.1573 | 11.2986 | 0.1261 | 48.5399  |
| CardioEmbolicStroke | genus..Ruminococcusgavvreauiigroup. id. 11342   | Inverse variance weighted | 8 | -0.0418 | 0.0488 | 0.3916 | -0.0251 | 0.0155 | 0.1573 | 11.2986 | 0.1261 | 48.5399  |
| CardioEmbolicStroke | genus..Ruminococcusgavvreauiigroup. id. 11342   | Simple mode               | 8 | -0.1603 | 0.1212 | 0.2277 | -0.0251 | 0.0155 | 0.1573 | 11.2986 | 0.1261 | 48.5399  |
| CardioEmbolicStroke | genus..Ruminococcusgavvreauiigroup. id. 11342   | Weighted mode             | 8 | 0.0559  | 0.0570 | 0.3598 | -0.0251 | 0.0155 | 0.1573 | 11.2986 | 0.1261 | 48.5399  |
| CardioEmbolicStroke | genus..Ruminococcusgnavusgroup. id. 14376       | MR Egger                  | 8 | -0.0010 | 0.1704 | 0.9954 | 0.0117  | 0.0236 | 0.6387 | 8.8087  | 0.1846 | 41.4439  |
| CardioEmbolicStroke | genus..Ruminococcusgnavusgroup. id. 14376       | Weighted median           | 8 | 0.0635  | 0.0704 | 0.3669 | 0.0117  | 0.0236 | 0.6387 | 8.8087  | 0.1846 | 41.4439  |
| CardioEmbolicStroke | genus..Ruminococcusgnavusgroup. id. 14376       | Inverse variance weighted | 8 | 0.0764  | 0.0631 | 0.2258 | 0.0117  | 0.0236 | 0.6387 | 8.8087  | 0.1846 | 41.4439  |
| CardioEmbolicStroke | genus..Ruminococcusgnavusgroup. id. 14376       | Simple mode               | 8 | 0.0973  | 0.1235 | 0.4566 | 0.0117  | 0.0236 | 0.6387 | 8.8087  | 0.1846 | 41.4439  |
| CardioEmbolicStroke | genus..Ruminococcusgnavusgroup. id. 14376       | Weighted mode             | 8 | 0.0497  | 0.0746 | 0.5270 | 0.0117  | 0.0236 | 0.6387 | 8.8087  | 0.1846 | 41.4439  |
| CardioEmbolicStroke | genus..Ruminococcusstorquesgroup. id. 14377     | MR Egger                  | 8 | 0.0771  | 0.0850 | 0.3994 | -0.0149 | 0.0117 | 0.2514 | 3.6898  | 0.8147 | 119.9406 |
| CardioEmbolicStroke | genus..Ruminococcusstorquesgroup. id. 14377     | Weighted median           | 8 | 0.0119  | 0.0411 | 0.7715 | -0.0149 | 0.0117 | 0.2514 | 3.6898  | 0.8147 | 119.9406 |
| CardioEmbolicStroke | genus..Ruminococcusstorquesgroup. id. 14377     | Inverse variance weighted | 8 | -0.0222 | 0.0332 | 0.5050 | -0.0149 | 0.0117 | 0.2514 | 3.6898  | 0.8147 | 119.9406 |
| CardioEmbolicStroke | genus..Ruminococcusstorquesgroup. id. 14377     | Simple mode               | 8 | -0.0177 | 0.0664 | 0.7975 | -0.0149 | 0.0117 | 0.2514 | 3.6898  | 0.8147 | 119.9406 |
| CardioEmbolicStroke | genus..Ruminococcusstorquesgroup. id. 14377     | Weighted mode             | 8 | 0.0132  | 0.0442 | 0.7735 | -0.0149 | 0.0117 | 0.2514 | 3.6898  | 0.8147 | 119.9406 |

|                     |                                 |                           |   |         |        |        |         |        |        |         |        |          |
|---------------------|---------------------------------|---------------------------|---|---------|--------|--------|---------|--------|--------|---------|--------|----------|
| CardioEmbolicStroke | genus. Actinomyces. id. 423     | MR Egger                  | 8 | 0.0713  | 0.1333 | 0.6120 | -0.0080 | 0.0183 | 0.6756 | 5.9206  | 0.4321 | 60.0641  |
| CardioEmbolicStroke | genus. Actinomyces. id. 423     | Weighted median           | 8 | 0.0297  | 0.0655 | 0.6502 | -0.0080 | 0.0183 | 0.6756 | 5.9206  | 0.4321 | 60.0641  |
| CardioEmbolicStroke | genus. Actinomyces. id. 423     | Inverse variance weighted | 8 | 0.0173  | 0.0518 | 0.7386 | -0.0080 | 0.0183 | 0.6756 | 5.9206  | 0.4321 | 60.0641  |
| CardioEmbolicStroke | genus. Actinomyces. id. 423     | Simple mode               | 8 | 0.1204  | 0.1125 | 0.3202 | -0.0080 | 0.0183 | 0.6756 | 5.9206  | 0.4321 | 60.0641  |
| CardioEmbolicStroke | genus. Actinomyces. id. 423     | Weighted mode             | 8 | 0.0416  | 0.0734 | 0.5883 | -0.0080 | 0.0183 | 0.6756 | 5.9206  | 0.4321 | 60.0641  |
| CardioEmbolicStroke | genus. Adlercreutzia. id. 812   | MR Egger                  | 8 | 0.1012  | 0.1269 | 0.4557 | -0.0097 | 0.0174 | 0.5974 | 5.7597  | 0.4506 | 60.4475  |
| CardioEmbolicStroke | genus. Adlercreutzia. id. 812   | Weighted median           | 8 | 0.0617  | 0.0623 | 0.3220 | -0.0097 | 0.0174 | 0.5974 | 5.7597  | 0.4506 | 60.4475  |
| CardioEmbolicStroke | genus. Adlercreutzia. id. 812   | Inverse variance weighted | 8 | 0.0360  | 0.0493 | 0.4657 | -0.0097 | 0.0174 | 0.5974 | 5.7597  | 0.4506 | 60.4475  |
| CardioEmbolicStroke | genus. Adlercreutzia. id. 812   | Simple mode               | 8 | -0.0935 | 0.1055 | 0.4049 | -0.0097 | 0.0174 | 0.5974 | 5.7597  | 0.4506 | 60.4475  |
| CardioEmbolicStroke | genus. Adlercreutzia. id. 812   | Weighted mode             | 8 | 0.0809  | 0.0732 | 0.3058 | -0.0097 | 0.0174 | 0.5974 | 5.7597  | 0.4506 | 60.4475  |
| CardioEmbolicStroke | genus. Akkermansia. id. 4037    | MR Egger                  | 8 | -0.0214 | 0.1047 | 0.8447 | -0.0083 | 0.0144 | 0.5847 | 2.5817  | 0.8592 | 86.1005  |
| CardioEmbolicStroke | genus. Akkermansia. id. 4037    | Weighted median           | 8 | -0.0562 | 0.0528 | 0.2870 | -0.0083 | 0.0144 | 0.5847 | 2.5817  | 0.8592 | 86.1005  |
| CardioEmbolicStroke | genus. Akkermansia. id. 4037    | Inverse variance weighted | 8 | -0.0771 | 0.0409 | 0.0596 | -0.0083 | 0.0144 | 0.5847 | 2.5817  | 0.8592 | 86.1005  |
| CardioEmbolicStroke | genus. Akkermansia. id. 4037    | Simple mode               | 8 | -0.0622 | 0.0788 | 0.4559 | -0.0083 | 0.0144 | 0.5847 | 2.5817  | 0.8592 | 86.1005  |
| CardioEmbolicStroke | genus. Akkermansia. id. 4037    | Weighted mode             | 8 | -0.0565 | 0.0571 | 0.3550 | -0.0083 | 0.0144 | 0.5847 | 2.5817  | 0.8592 | 86.1005  |
| CardioEmbolicStroke | genus. Alistipes. id. 968       | MR Egger                  | 8 | -0.1662 | 0.0856 | 0.1004 | 0.0187  | 0.0118 | 0.1649 | 3.4183  | 0.8438 | 118.0246 |
| CardioEmbolicStroke | genus. Alistipes. id. 968       | Weighted median           | 8 | -0.0684 | 0.0418 | 0.1022 | 0.0187  | 0.0118 | 0.1649 | 3.4183  | 0.8438 | 118.0246 |
| CardioEmbolicStroke | genus. Alistipes. id. 968       | Inverse variance weighted | 8 | -0.0415 | 0.0335 | 0.2148 | 0.0187  | 0.0118 | 0.1649 | 3.4183  | 0.8438 | 118.0246 |
| CardioEmbolicStroke | genus. Alistipes. id. 968       | Simple mode               | 8 | 0.0397  | 0.0770 | 0.6221 | 0.0187  | 0.0118 | 0.1649 | 3.4183  | 0.8438 | 118.0246 |
| CardioEmbolicStroke | genus. Alistipes. id. 968       | Weighted mode             | 8 | -0.0865 | 0.0468 | 0.1070 | 0.0187  | 0.0118 | 0.1649 | 3.4183  | 0.8438 | 118.0246 |
| CardioEmbolicStroke | genus. Allisonella. id. 2174    | MR Egger                  | 8 | 0.0805  | 0.3280 | 0.8144 | -0.0052 | 0.0452 | 0.9123 | 16.1713 | 0.0129 | 12.9075  |
| CardioEmbolicStroke | genus. Allisonella. id. 2174    | Weighted median           | 8 | -0.0432 | 0.1042 | 0.6782 | -0.0052 | 0.0452 | 0.9123 | 16.1713 | 0.0129 | 12.9075  |
| CardioEmbolicStroke | genus. Allisonella. id. 2174    | Inverse variance weighted | 8 | 0.0458  | 0.1186 | 0.6994 | -0.0052 | 0.0452 | 0.9123 | 16.1713 | 0.0129 | 12.9075  |
| CardioEmbolicStroke | genus. Allisonella. id. 2174    | Simple mode               | 8 | -0.1061 | 0.2222 | 0.6477 | -0.0052 | 0.0452 | 0.9123 | 16.1713 | 0.0129 | 12.9075  |
| CardioEmbolicStroke | genus. Allisonella. id. 2174    | Weighted mode             | 8 | -0.0533 | 0.1169 | 0.6621 | -0.0052 | 0.0452 | 0.9123 | 16.1713 | 0.0129 | 12.9075  |
| CardioEmbolicStroke | genus. Alloprevotella. id. 961  | MR Egger                  | 8 | -0.0236 | 0.2384 | 0.9242 | 0.0005  | 0.0331 | 0.9879 | 8.2764  | 0.2185 | 24.5059  |
| CardioEmbolicStroke | genus. Alloprevotella. id. 961  | Weighted median           | 8 | -0.0593 | 0.0994 | 0.5508 | 0.0005  | 0.0331 | 0.9879 | 8.2764  | 0.2185 | 24.5059  |
| CardioEmbolicStroke | genus. Alloprevotella. id. 961  | Inverse variance weighted | 8 | -0.0202 | 0.0867 | 0.8159 | 0.0005  | 0.0331 | 0.9879 | 8.2764  | 0.2185 | 24.5059  |
| CardioEmbolicStroke | genus. Alloprevotella. id. 961  | Simple mode               | 8 | -0.0994 | 0.1511 | 0.5318 | 0.0005  | 0.0331 | 0.9879 | 8.2764  | 0.2185 | 24.5059  |
| CardioEmbolicStroke | genus. Alloprevotella. id. 961  | Weighted mode             | 8 | -0.0677 | 0.1091 | 0.5545 | 0.0005  | 0.0331 | 0.9879 | 8.2764  | 0.2185 | 24.5059  |
| CardioEmbolicStroke | genus. Anaerofilum. id. 2053    | MR Egger                  | 8 | -0.0394 | 0.1610 | 0.8150 | 0.0016  | 0.0221 | 0.9439 | 4.6454  | 0.5900 | 59.4033  |
| CardioEmbolicStroke | genus. Anaerofilum. id. 2053    | Weighted median           | 8 | -0.0299 | 0.0741 | 0.6867 | 0.0016  | 0.0221 | 0.9439 | 4.6454  | 0.5900 | 59.4033  |
| CardioEmbolicStroke | genus. Anaerofilum. id. 2053    | Inverse variance weighted | 8 | -0.0285 | 0.0627 | 0.6493 | 0.0016  | 0.0221 | 0.9439 | 4.6454  | 0.5900 | 59.4033  |
| CardioEmbolicStroke | genus. Anaerofilum. id. 2053    | Simple mode               | 8 | 0.0457  | 0.1273 | 0.7303 | 0.0016  | 0.0221 | 0.9439 | 4.6454  | 0.5900 | 59.4033  |
| CardioEmbolicStroke | genus. Anaerofilum. id. 2053    | Weighted mode             | 8 | -0.0100 | 0.0846 | 0.9090 | 0.0016  | 0.0221 | 0.9439 | 4.6454  | 0.5900 | 59.4033  |
| CardioEmbolicStroke | genus. Anaerostipes. id. 1991   | MR Egger                  | 8 | -0.1193 | 0.0917 | 0.2409 | 0.0157  | 0.0127 | 0.2605 | 8.3592  | 0.3020 | 83.2865  |
| CardioEmbolicStroke | genus. Anaerostipes. id. 1991   | Weighted median           | 8 | -0.0234 | 0.0428 | 0.5847 | 0.0157  | 0.0127 | 0.2605 | 8.3592  | 0.3020 | 83.2865  |
| CardioEmbolicStroke | genus. Anaerostipes. id. 1991   | Inverse variance weighted | 8 | -0.0145 | 0.0373 | 0.6973 | 0.0157  | 0.0127 | 0.2605 | 8.3592  | 0.3020 | 83.2865  |
| CardioEmbolicStroke | genus. Anaerostipes. id. 1991   | Simple mode               | 8 | -0.0469 | 0.0832 | 0.5904 | 0.0157  | 0.0127 | 0.2605 | 8.3592  | 0.3020 | 83.2865  |
| CardioEmbolicStroke | genus. Anaerostipes. id. 1991   | Weighted mode             | 8 | -0.0306 | 0.0496 | 0.5565 | 0.0157  | 0.0127 | 0.2605 | 8.3592  | 0.3020 | 83.2865  |
| CardioEmbolicStroke | genus. Anaerotruncus. id. 2054  | MR Egger                  | 8 | -0.0717 | 0.1000 | 0.5006 | 0.0046  | 0.0138 | 0.7504 | 7.7209  | 0.2593 | 82.6651  |
| CardioEmbolicStroke | genus. Anaerotruncus. id. 2054  | Weighted median           | 8 | -0.0367 | 0.0475 | 0.4401 | 0.0046  | 0.0138 | 0.7504 | 7.7209  | 0.2593 | 82.6651  |
| CardioEmbolicStroke | genus. Anaerotruncus. id. 2054  | Inverse variance weighted | 8 | -0.0410 | 0.0366 | 0.2619 | 0.0046  | 0.0138 | 0.7504 | 7.7209  | 0.2593 | 82.6651  |
| CardioEmbolicStroke | genus. Anaerotruncus. id. 2054  | Simple mode               | 8 | -0.0238 | 0.0668 | 0.7317 | 0.0046  | 0.0138 | 0.7504 | 7.7209  | 0.2593 | 82.6651  |
| CardioEmbolicStroke | genus. Anaerotruncus. id. 2054  | Weighted mode             | 8 | -0.0359 | 0.0495 | 0.4920 | 0.0046  | 0.0138 | 0.7504 | 7.7209  | 0.2593 | 82.6651  |
| CardioEmbolicStroke | genus. Bacteroides. id. 918     | MR Egger                  | 8 | -0.1566 | 0.1007 | 0.1710 | 0.0184  | 0.0139 | 0.2344 | 11.2199 | 0.1293 | 71.4191  |
| CardioEmbolicStroke | genus. Bacteroides. id. 918     | Weighted median           | 8 | -0.0921 | 0.0432 | 0.0330 | 0.0184  | 0.0139 | 0.2344 | 11.2199 | 0.1293 | 71.4191  |
| CardioEmbolicStroke | genus. Bacteroides. id. 918     | Inverse variance weighted | 8 | -0.0341 | 0.0415 | 0.4110 | 0.0184  | 0.0139 | 0.2344 | 11.2199 | 0.1293 | 71.4191  |
| CardioEmbolicStroke | genus. Bacteroides. id. 918     | Simple mode               | 8 | -0.0192 | 0.0887 | 0.8347 | 0.0184  | 0.0139 | 0.2344 | 11.2199 | 0.1293 | 71.4191  |
| CardioEmbolicStroke | genus. Bacteroides. id. 918     | Weighted mode             | 8 | -0.0945 | 0.0455 | 0.0761 | 0.0184  | 0.0139 | 0.2344 | 11.2199 | 0.1293 | 71.4191  |
| CardioEmbolicStroke | genus. Barnesiella. id. 944     | MR Egger                  | 8 | -0.0889 | 0.1233 | 0.4978 | 0.0092  | 0.0170 | 0.6089 | 9.9792  | 0.1255 | 59.2551  |
| CardioEmbolicStroke | genus. Barnesiella. id. 944     | Weighted median           | 8 | -0.0193 | 0.0481 | 0.6884 | 0.0092  | 0.0170 | 0.6089 | 9.9792  | 0.1255 | 59.2551  |
| CardioEmbolicStroke | genus. Barnesiella. id. 944     | Inverse variance weighted | 8 | -0.0277 | 0.0456 | 0.5438 | 0.0092  | 0.0170 | 0.6089 | 9.9792  | 0.1255 | 59.2551  |
| CardioEmbolicStroke | genus. Barnesiella. id. 944     | Simple mode               | 8 | -0.0026 | 0.0771 | 0.9745 | 0.0092  | 0.0170 | 0.6089 | 9.9792  | 0.1255 | 59.2551  |
| CardioEmbolicStroke | genus. Barnesiella. id. 944     | Weighted mode             | 8 | -0.0152 | 0.0528 | 0.7823 | 0.0092  | 0.0170 | 0.6089 | 9.9792  | 0.1255 | 59.2551  |
| CardioEmbolicStroke | genus. Bifidobacterium. id. 436 | MR Egger                  | 8 | 0.0090  | 0.0931 | 0.9260 | 0.0035  | 0.0129 | 0.7947 | 3.1796  | 0.7860 | 119.0303 |
| CardioEmbolicStroke | genus. Bifidobacterium. id. 436 | Weighted median           | 8 | 0.0369  | 0.0449 | 0.4118 | 0.0035  | 0.0129 | 0.7947 | 3.1796  | 0.7860 | 119.0303 |
| CardioEmbolicStroke | genus. Bifidobacterium. id. 436 | Inverse variance weighted | 8 | 0.0323  | 0.0365 | 0.3753 | 0.0035  | 0.0129 | 0.7947 | 3.1796  | 0.7860 | 119.0303 |

|                     |                                            |                           |   |         |        |        |         |        |        |         |        |          |
|---------------------|--------------------------------------------|---------------------------|---|---------|--------|--------|---------|--------|--------|---------|--------|----------|
| CardioEmbolicStroke | genus.Bifidobacterium.id.436               | Simple mode               | 8 | 0.0793  | 0.0713 | 0.3023 | 0.0035  | 0.0129 | 0.7947 | 3.1796  | 0.7860 | 119.0303 |
| CardioEmbolicStroke | genus.Bifidobacterium.id.436               | Weighted mode             | 8 | 0.0417  | 0.0500 | 0.4322 | 0.0035  | 0.0129 | 0.7947 | 3.1796  | 0.7860 | 119.0303 |
| CardioEmbolicStroke | genus.Bilophila.id.3170                    | MR Egger                  | 8 | -0.0207 | 0.1413 | 0.8881 | -0.0010 | 0.0195 | 0.9596 | 12.0105 | 0.0617 | 52.5822  |
| CardioEmbolicStroke | genus.Bilophila.id.3170                    | Weighted median           | 8 | -0.0449 | 0.0492 | 0.3619 | -0.0010 | 0.0195 | 0.9596 | 12.0105 | 0.0617 | 52.5822  |
| CardioEmbolicStroke | genus.Bilophila.id.3170                    | Inverse variance weighted | 8 | -0.0276 | 0.0512 | 0.5901 | -0.0010 | 0.0195 | 0.9596 | 12.0105 | 0.0617 | 52.5822  |
| CardioEmbolicStroke | genus.Bilophila.id.3170                    | Simple mode               | 8 | -0.0262 | 0.0957 | 0.7924 | -0.0010 | 0.0195 | 0.9596 | 12.0105 | 0.0617 | 52.5822  |
| CardioEmbolicStroke | genus.Bilophila.id.3170                    | Weighted mode             | 8 | -0.0537 | 0.0547 | 0.3585 | -0.0010 | 0.0195 | 0.9596 | 12.0105 | 0.0617 | 52.5822  |
| CardioEmbolicStroke | genus.Blautia.id.1992                      | MR Egger                  | 8 | -0.0694 | 0.0888 | 0.4645 | 0.0049  | 0.0123 | 0.7022 | 6.7493  | 0.3447 | 85.2539  |
| CardioEmbolicStroke | genus.Blautia.id.1992                      | Weighted median           | 8 | -0.0264 | 0.0413 | 0.5232 | 0.0049  | 0.0123 | 0.7022 | 6.7493  | 0.3447 | 85.2539  |
| CardioEmbolicStroke | genus.Blautia.id.1992                      | Inverse variance weighted | 8 | -0.0366 | 0.0328 | 0.2646 | 0.0049  | 0.0123 | 0.7022 | 6.7493  | 0.3447 | 85.2539  |
| CardioEmbolicStroke | genus.Blautia.id.1992                      | Simple mode               | 8 | 0.0346  | 0.0678 | 0.6252 | 0.0049  | 0.0123 | 0.7022 | 6.7493  | 0.3447 | 85.2539  |
| CardioEmbolicStroke | genus.Blautia.id.1992                      | Weighted mode             | 8 | -0.0242 | 0.0471 | 0.6233 | 0.0049  | 0.0123 | 0.7022 | 6.7493  | 0.3447 | 85.2539  |
| CardioEmbolicStroke | genus.Butyricicoccus.id.2055               | MR Egger                  | 8 | -0.0130 | 0.0979 | 0.8987 | -0.0110 | 0.0135 | 0.4478 | 7.6175  | 0.2675 | 58.6836  |
| CardioEmbolicStroke | genus.Butyricicoccus.id.2055               | Weighted median           | 8 | -0.0566 | 0.0436 | 0.1937 | -0.0110 | 0.0135 | 0.4478 | 7.6175  | 0.2675 | 58.6836  |
| CardioEmbolicStroke | genus.Butyricicoccus.id.2055               | Inverse variance weighted | 8 | -0.0861 | 0.0373 | 0.0209 | -0.0110 | 0.0135 | 0.4478 | 7.6175  | 0.2675 | 58.6836  |
| CardioEmbolicStroke | genus.Butyricicoccus.id.2055               | Simple mode               | 8 | -0.0561 | 0.0767 | 0.4887 | -0.0110 | 0.0135 | 0.4478 | 7.6175  | 0.2675 | 58.6836  |
| CardioEmbolicStroke | genus.Butyricicoccus.id.2055               | Weighted mode             | 8 | -0.0528 | 0.0460 | 0.2886 | -0.0110 | 0.0135 | 0.4478 | 7.6175  | 0.2675 | 58.6836  |
| CardioEmbolicStroke | genus.Butyricimonas.id.945                 | MR Egger                  | 8 | 0.0332  | 0.1407 | 0.8213 | 0.0050  | 0.0194 | 0.8064 | 9.8203  | 0.1324 | 45.6235  |
| CardioEmbolicStroke | genus.Butyricimonas.id.945                 | Weighted median           | 8 | 0.0307  | 0.0560 | 0.5833 | 0.0050  | 0.0194 | 0.8064 | 9.8203  | 0.1324 | 45.6235  |
| CardioEmbolicStroke | genus.Butyricimonas.id.945                 | Inverse variance weighted | 8 | 0.0664  | 0.0511 | 0.1938 | 0.0050  | 0.0194 | 0.8064 | 9.8203  | 0.1324 | 45.6235  |
| CardioEmbolicStroke | genus.Butyricimonas.id.945                 | Simple mode               | 8 | 0.1840  | 0.1063 | 0.1271 | 0.0050  | 0.0194 | 0.8064 | 9.8203  | 0.1324 | 45.6235  |
| CardioEmbolicStroke | genus.Butyricimonas.id.945                 | Weighted mode             | 8 | 0.0379  | 0.0600 | 0.5469 | 0.0050  | 0.0194 | 0.8064 | 9.8203  | 0.1324 | 45.6235  |
| CardioEmbolicStroke | genus.Butyrivibrio.id.1993                 | MR Egger                  | 8 | -0.0003 | 0.2163 | 0.9989 | 0.0005  | 0.0298 | 0.9869 | 7.5001  | 0.2771 | 33.6542  |
| CardioEmbolicStroke | genus.Butyrivibrio.id.1993                 | Weighted median           | 8 | -0.0096 | 0.0979 | 0.9217 | 0.0005  | 0.0298 | 0.9869 | 7.5001  | 0.2771 | 33.6542  |
| CardioEmbolicStroke | genus.Butyrivibrio.id.1993                 | Inverse variance weighted | 8 | 0.0031  | 0.0782 | 0.9683 | 0.0005  | 0.0298 | 0.9869 | 7.5001  | 0.2771 | 33.6542  |
| CardioEmbolicStroke | genus.Butyrivibrio.id.1993                 | Simple mode               | 8 | 0.0213  | 0.1454 | 0.8879 | 0.0005  | 0.0298 | 0.9869 | 7.5001  | 0.2771 | 33.6542  |
| CardioEmbolicStroke | genus.Butyrivibrio.id.1993                 | Weighted mode             | 8 | -0.0101 | 0.1050 | 0.9259 | 0.0005  | 0.0298 | 0.9869 | 7.5001  | 0.2771 | 33.6542  |
| CardioEmbolicStroke | genus.CandidatusSoleaferrea.id.11350       | MR Egger                  | 8 | -0.1244 | 0.1742 | 0.5018 | 0.0201  | 0.0240 | 0.4347 | 8.6132  | 0.1965 | 36.4111  |
| CardioEmbolicStroke | genus.CandidatusSoleaferrea.id.11350       | Weighted median           | 8 | 0.0510  | 0.0729 | 0.4836 | 0.0201  | 0.0240 | 0.4347 | 8.6132  | 0.1965 | 36.4111  |
| CardioEmbolicStroke | genus.CandidatusSoleaferrea.id.11350       | Inverse variance weighted | 8 | 0.0098  | 0.0665 | 0.8831 | 0.0201  | 0.0240 | 0.4347 | 8.6132  | 0.1965 | 36.4111  |
| CardioEmbolicStroke | genus.CandidatusSoleaferrea.id.11350       | Simple mode               | 8 | 0.1891  | 0.1318 | 0.1945 | 0.0201  | 0.0240 | 0.4347 | 8.6132  | 0.1965 | 36.4111  |
| CardioEmbolicStroke | genus.CandidatusSoleaferrea.id.11350       | Weighted mode             | 8 | -0.0295 | 0.0838 | 0.7350 | 0.0201  | 0.0240 | 0.4347 | 8.6132  | 0.1965 | 36.4111  |
| CardioEmbolicStroke | genus.Catenibacterium.id.2153              | MR Egger                  | 8 | -0.1365 | 0.1972 | 0.5148 | 0.0203  | 0.0273 | 0.4854 | 5.8914  | 0.4355 | 32.9912  |
| CardioEmbolicStroke | genus.Catenibacterium.id.2153              | Weighted median           | 8 | -0.0457 | 0.0993 | 0.6451 | 0.0203  | 0.0273 | 0.4854 | 5.8914  | 0.4355 | 32.9912  |
| CardioEmbolicStroke | genus.Catenibacterium.id.2153              | Inverse variance weighted | 8 | -0.0017 | 0.0774 | 0.9828 | 0.0203  | 0.0273 | 0.4854 | 5.8914  | 0.4355 | 32.9912  |
| CardioEmbolicStroke | genus.Catenibacterium.id.2153              | Simple mode               | 8 | -0.1691 | 0.1795 | 0.3775 | 0.0203  | 0.0273 | 0.4854 | 5.8914  | 0.4355 | 32.9912  |
| CardioEmbolicStroke | genus.Catenibacterium.id.2153              | Weighted mode             | 8 | -0.1018 | 0.1023 | 0.3530 | 0.0203  | 0.0273 | 0.4854 | 5.8914  | 0.4355 | 32.9912  |
| CardioEmbolicStroke | genus.ChristensenellaceaeR.7group.id.11283 | MR Egger                  | 8 | -0.0545 | 0.1218 | 0.6700 | 0.0064  | 0.0168 | 0.7174 | 11.2587 | 0.0807 | 64.6701  |
| CardioEmbolicStroke | genus.ChristensenellaceaeR.7group.id.11283 | Weighted median           | 8 | -0.0059 | 0.0475 | 0.9016 | 0.0064  | 0.0168 | 0.7174 | 11.2587 | 0.0807 | 64.6701  |
| CardioEmbolicStroke | genus.ChristensenellaceaeR.7group.id.11283 | Inverse variance weighted | 8 | -0.0120 | 0.0446 | 0.7878 | 0.0064  | 0.0168 | 0.7174 | 11.2587 | 0.0807 | 64.6701  |
| CardioEmbolicStroke | genus.ChristensenellaceaeR.7group.id.11283 | Simple mode               | 8 | 0.0872  | 0.0891 | 0.3604 | 0.0064  | 0.0168 | 0.7174 | 11.2587 | 0.0807 | 64.6701  |
| CardioEmbolicStroke | genus.ChristensenellaceaeR.7group.id.11283 | Weighted mode             | 8 | 0.0004  | 0.0513 | 0.9933 | 0.0064  | 0.0168 | 0.7174 | 11.2587 | 0.0807 | 64.6701  |
| CardioEmbolicStroke | genus.Clostridiumsensustrictol.id.1873     | MR Egger                  | 8 | 0.0683  | 0.1727 | 0.7060 | -0.0040 | 0.0238 | 0.8734 | 19.5913 | 0.0033 | 42.6526  |
| CardioEmbolicStroke | genus.Clostridiumsensustrictol.id.1873     | Weighted median           | 8 | 0.0277  | 0.0498 | 0.5776 | -0.0040 | 0.0238 | 0.8734 | 19.5913 | 0.0033 | 42.6526  |
| CardioEmbolicStroke | genus.Clostridiumsensustrictol.id.1873     | Inverse variance weighted | 8 | 0.0419  | 0.0626 | 0.5032 | -0.0040 | 0.0238 | 0.8734 | 19.5913 | 0.0033 | 42.6526  |
| CardioEmbolicStroke | genus.Clostridiumsensustrictol.id.1873     | Simple mode               | 8 | -0.0089 | 0.1030 | 0.9335 | -0.0040 | 0.0238 | 0.8734 | 19.5913 | 0.0033 | 42.6526  |
| CardioEmbolicStroke | genus.Clostridiumsensustrictol.id.1873     | Weighted mode             | 8 | 0.0237  | 0.0555 | 0.6829 | -0.0040 | 0.0238 | 0.8734 | 19.5913 | 0.0033 | 42.6526  |
| CardioEmbolicStroke | genus.Collinsella.id.815                   | MR Egger                  | 8 | -0.0984 | 0.1575 | 0.5552 | 0.0216  | 0.0217 | 0.3589 | 19.1580 | 0.0077 | 40.8133  |
| CardioEmbolicStroke | genus.Collinsella.id.815                   | Weighted median           | 8 | 0.0000  | 0.0484 | 0.9996 | 0.0216  | 0.0217 | 0.3589 | 19.1580 | 0.0077 | 40.8133  |
| CardioEmbolicStroke | genus.Collinsella.id.815                   | Inverse variance weighted | 8 | 0.0456  | 0.0615 | 0.4581 | 0.0216  | 0.0217 | 0.3589 | 19.1580 | 0.0077 | 40.8133  |
| CardioEmbolicStroke | genus.Collinsella.id.815                   | Simple mode               | 8 | 0.0766  | 0.0678 | 0.2956 | 0.0216  | 0.0217 | 0.3589 | 19.1580 | 0.0077 | 40.8133  |
| CardioEmbolicStroke | genus.Collinsella.id.815                   | Weighted mode             | 8 | -0.0243 | 0.0483 | 0.6295 | 0.0216  | 0.0217 | 0.3589 | 19.1580 | 0.0077 | 40.8133  |
| CardioEmbolicStroke | genus.Copro bacter.id.949                  | MR Egger                  | 8 | -0.0707 | 0.1563 | 0.6670 | 0.0009  | 0.0215 | 0.9668 | 7.6747  | 0.2629 | 44.6059  |
| CardioEmbolicStroke | genus.Copro bacter.id.949                  | Weighted median           | 8 | -0.0972 | 0.0711 | 0.1716 | 0.0009  | 0.0215 | 0.9668 | 7.6747  | 0.2629 | 44.6059  |
| CardioEmbolicStroke | genus.Copro bacter.id.949                  | Inverse variance weighted | 8 | -0.0645 | 0.0565 | 0.2538 | 0.0009  | 0.0215 | 0.9668 | 7.6747  | 0.2629 | 44.6059  |
| CardioEmbolicStroke | genus.Copro bacter.id.949                  | Simple mode               | 8 | -0.1780 | 0.1274 | 0.2050 | 0.0009  | 0.0215 | 0.9668 | 7.6747  | 0.2629 | 44.6059  |
| CardioEmbolicStroke | genus.Copro bacter.id.949                  | Weighted mode             | 8 | -0.1132 | 0.0755 | 0.1776 | 0.0009  | 0.0215 | 0.9668 | 7.6747  | 0.2629 | 44.6059  |
| CardioEmbolicStroke | genus.Coproccocusl.id.11301                | MR Egger                  | 8 | 0.0497  | 0.0878 | 0.5918 | 0.0013  | 0.0121 | 0.9182 | 2.8554  | 0.8268 | 101.0944 |

|                     |                                             |                           |   |         |        |        |         |        |        |         |        |          |
|---------------------|---------------------------------------------|---------------------------|---|---------|--------|--------|---------|--------|--------|---------|--------|----------|
| CardioEmbolicStroke | genus. Coprococcus1. id. 11301              | Weighted median           | 8 | 0.0601  | 0.0442 | 0.1735 | 0.0013  | 0.0121 | 0.9182 | 2.8554  | 0.8268 | 101.0944 |
| CardioEmbolicStroke | genus. Coprococcus1. id. 11301              | Inverse variance weighted | 8 | 0.0584  | 0.0343 | 0.0891 | 0.0013  | 0.0121 | 0.9182 | 2.8554  | 0.8268 | 101.0944 |
| CardioEmbolicStroke | genus. Coprococcus1. id. 11301              | Simple mode               | 8 | 0.0740  | 0.0664 | 0.3019 | 0.0013  | 0.0121 | 0.9182 | 2.8554  | 0.8268 | 101.0944 |
| CardioEmbolicStroke | genus. Coprococcus1. id. 11301              | Weighted mode             | 8 | 0.0614  | 0.0471 | 0.2337 | 0.0013  | 0.0121 | 0.9182 | 2.8554  | 0.8268 | 101.0944 |
| CardioEmbolicStroke | genus. Coprococcus2. id. 11302              | MR Egger                  | 8 | 0.1237  | 0.1373 | 0.4023 | -0.0232 | 0.0189 | 0.2676 | 12.5987 | 0.0825 | 49.4886  |
| CardioEmbolicStroke | genus. Coprococcus2. id. 11302              | Weighted median           | 8 | 0.0228  | 0.0553 | 0.6801 | -0.0232 | 0.0189 | 0.2676 | 12.5987 | 0.0825 | 49.4886  |
| CardioEmbolicStroke | genus. Coprococcus2. id. 11302              | Inverse variance weighted | 8 | -0.0307 | 0.0555 | 0.5804 | -0.0232 | 0.0189 | 0.2676 | 12.5987 | 0.0825 | 49.4886  |
| CardioEmbolicStroke | genus. Coprococcus2. id. 11302              | Simple mode               | 8 | 0.0521  | 0.0949 | 0.6004 | -0.0232 | 0.0189 | 0.2676 | 12.5987 | 0.0825 | 49.4886  |
| CardioEmbolicStroke | genus. Coprococcus2. id. 11302              | Weighted mode             | 8 | 0.0370  | 0.0541 | 0.5164 | -0.0232 | 0.0189 | 0.2676 | 12.5987 | 0.0825 | 49.4886  |
| CardioEmbolicStroke | genus. Coprococcus3. id. 11303              | MR Egger                  | 8 | 0.0206  | 0.0902 | 0.8271 | -0.0040 | 0.0124 | 0.7601 | 5.8620  | 0.4388 | 97.0348  |
| CardioEmbolicStroke | genus. Coprococcus3. id. 11303              | Weighted median           | 8 | 0.0064  | 0.0440 | 0.8837 | -0.0040 | 0.0124 | 0.7601 | 5.8620  | 0.4388 | 97.0348  |
| CardioEmbolicStroke | genus. Coprococcus3. id. 11303              | Inverse variance weighted | 8 | -0.0060 | 0.0353 | 0.8659 | -0.0040 | 0.0124 | 0.7601 | 5.8620  | 0.4388 | 97.0348  |
| CardioEmbolicStroke | genus. Coprococcus3. id. 11303              | Simple mode               | 8 | -0.0487 | 0.0747 | 0.5354 | -0.0040 | 0.0124 | 0.7601 | 5.8620  | 0.4388 | 97.0348  |
| CardioEmbolicStroke | genus. Coprococcus3. id. 11303              | Weighted mode             | 8 | 0.0109  | 0.0523 | 0.8415 | -0.0040 | 0.0124 | 0.7601 | 5.8620  | 0.4388 | 97.0348  |
| CardioEmbolicStroke | genus. DefluviitaleaceaeUCG011. id. 11287   | MR Egger                  | 8 | -0.1429 | 0.1746 | 0.4444 | 0.0102  | 0.0240 | 0.6850 | 11.4147 | 0.0764 | 35.4684  |
| CardioEmbolicStroke | genus. DefluviitaleaceaeUCG011. id. 11287   | Weighted median           | 8 | -0.0591 | 0.0632 | 0.3494 | 0.0102  | 0.0240 | 0.6850 | 11.4147 | 0.0764 | 35.4684  |
| CardioEmbolicStroke | genus. DefluviitaleaceaeUCG011. id. 11287   | Inverse variance weighted | 8 | -0.0744 | 0.0639 | 0.2443 | 0.0102  | 0.0240 | 0.6850 | 11.4147 | 0.0764 | 35.4684  |
| CardioEmbolicStroke | genus. DefluviitaleaceaeUCG011. id. 11287   | Simple mode               | 8 | -0.2114 | 0.1145 | 0.1075 | 0.0102  | 0.0240 | 0.6850 | 11.4147 | 0.0764 | 35.4684  |
| CardioEmbolicStroke | genus. DefluviitaleaceaeUCG011. id. 11287   | Weighted mode             | 8 | -0.0813 | 0.0680 | 0.2711 | 0.0102  | 0.0240 | 0.6850 | 11.4147 | 0.0764 | 35.4684  |
| CardioEmbolicStroke | genus. Desulfovibrio. id. 3173              | MR Egger                  | 8 | 0.0349  | 0.1237 | 0.7874 | -0.0161 | 0.0170 | 0.3805 | 6.5194  | 0.3676 | 57.9312  |
| CardioEmbolicStroke | genus. Desulfovibrio. id. 3173              | Weighted median           | 8 | -0.0431 | 0.0587 | 0.4624 | -0.0161 | 0.0170 | 0.3805 | 6.5194  | 0.3676 | 57.9312  |
| CardioEmbolicStroke | genus. Desulfovibrio. id. 3173              | Inverse variance weighted | 8 | -0.0729 | 0.0479 | 0.1283 | -0.0161 | 0.0170 | 0.3805 | 6.5194  | 0.3676 | 57.9312  |
| CardioEmbolicStroke | genus. Desulfovibrio. id. 3173              | Simple mode               | 8 | -0.0343 | 0.0894 | 0.7124 | -0.0161 | 0.0170 | 0.3805 | 6.5194  | 0.3676 | 57.9312  |
| CardioEmbolicStroke | genus. Desulfovibrio. id. 3173              | Weighted mode             | 8 | -0.0343 | 0.0668 | 0.6232 | -0.0161 | 0.0170 | 0.3805 | 6.5194  | 0.3676 | 57.9312  |
| CardioEmbolicStroke | genus. Dialister. id. 2183                  | MR Egger                  | 8 | -0.1745 | 0.1182 | 0.1904 | 0.0154  | 0.0163 | 0.3829 | 7.8803  | 0.2470 | 58.5187  |
| CardioEmbolicStroke | genus. Dialister. id. 2183                  | Weighted median           | 8 | -0.1021 | 0.0499 | 0.0408 | 0.0154  | 0.0163 | 0.3829 | 7.8803  | 0.2470 | 58.5187  |
| CardioEmbolicStroke | genus. Dialister. id. 2183                  | Inverse variance weighted | 8 | -0.0721 | 0.0459 | 0.1163 | 0.0154  | 0.0163 | 0.3829 | 7.8803  | 0.2470 | 58.5187  |
| CardioEmbolicStroke | genus. Dialister. id. 2183                  | Simple mode               | 8 | -0.0863 | 0.0764 | 0.2962 | 0.0154  | 0.0163 | 0.3829 | 7.8803  | 0.2470 | 58.5187  |
| CardioEmbolicStroke | genus. Dialister. id. 2183                  | Weighted mode             | 8 | -0.1056 | 0.0557 | 0.0997 | 0.0154  | 0.0163 | 0.3829 | 7.8803  | 0.2470 | 58.5187  |
| CardioEmbolicStroke | genus. Dorea. id. 1997                      | MR Egger                  | 8 | 0.1596  | 0.0854 | 0.1110 | -0.0220 | 0.0118 | 0.1113 | 5.1201  | 0.6453 | 118.0197 |
| CardioEmbolicStroke | genus. Dorea. id. 1997                      | Weighted median           | 8 | 0.0425  | 0.0430 | 0.3233 | -0.0220 | 0.0118 | 0.1113 | 5.1201  | 0.6453 | 118.0197 |
| CardioEmbolicStroke | genus. Dorea. id. 1997                      | Inverse variance weighted | 8 | 0.0129  | 0.0334 | 0.6997 | -0.0220 | 0.0118 | 0.1113 | 5.1201  | 0.6453 | 118.0197 |
| CardioEmbolicStroke | genus. Dorea. id. 1997                      | Simple mode               | 8 | 0.0357  | 0.0778 | 0.6601 | -0.0220 | 0.0118 | 0.1113 | 5.1201  | 0.6453 | 118.0197 |
| CardioEmbolicStroke | genus. Dorea. id. 1997                      | Weighted mode             | 8 | 0.0565  | 0.0490 | 0.2872 | -0.0220 | 0.0118 | 0.1113 | 5.1201  | 0.6453 | 118.0197 |
| CardioEmbolicStroke | genus. Eggerthella. id. 819                 | MR Egger                  | 8 | 0.0417  | 0.1586 | 0.8013 | -0.0090 | 0.0218 | 0.6948 | 3.5020  | 0.7437 | 57.9472  |
| CardioEmbolicStroke | genus. Eggerthella. id. 819                 | Weighted median           | 8 | -0.0012 | 0.0782 | 0.9874 | -0.0090 | 0.0218 | 0.6948 | 3.5020  | 0.7437 | 57.9472  |
| CardioEmbolicStroke | genus. Eggerthella. id. 819                 | Inverse variance weighted | 8 | -0.0184 | 0.0619 | 0.7661 | -0.0090 | 0.0218 | 0.6948 | 3.5020  | 0.7437 | 57.9472  |
| CardioEmbolicStroke | genus. Eggerthella. id. 819                 | Simple mode               | 8 | 0.0042  | 0.1239 | 0.9740 | -0.0090 | 0.0218 | 0.6948 | 3.5020  | 0.7437 | 57.9472  |
| CardioEmbolicStroke | genus. Eggerthella. id. 819                 | Weighted mode             | 8 | 0.0060  | 0.0901 | 0.9487 | -0.0090 | 0.0218 | 0.6948 | 3.5020  | 0.7437 | 57.9472  |
| CardioEmbolicStroke | genus. Eisenbergiella. id. 11304            | MR Egger                  | 8 | -0.1536 | 0.1639 | 0.3849 | 0.0151  | 0.0227 | 0.5292 | 7.0358  | 0.3175 | 34.8042  |
| CardioEmbolicStroke | genus. Eisenbergiella. id. 11304            | Weighted median           | 8 | -0.0915 | 0.0773 | 0.2369 | 0.0151  | 0.0227 | 0.5292 | 7.0358  | 0.3175 | 34.8042  |
| CardioEmbolicStroke | genus. Eisenbergiella. id. 11304            | Inverse variance weighted | 8 | -0.0529 | 0.0616 | 0.3906 | 0.0151  | 0.0227 | 0.5292 | 7.0358  | 0.3175 | 34.8042  |
| CardioEmbolicStroke | genus. Eisenbergiella. id. 11304            | Simple mode               | 8 | -0.0569 | 0.1309 | 0.6768 | 0.0151  | 0.0227 | 0.5292 | 7.0358  | 0.3175 | 34.8042  |
| CardioEmbolicStroke | genus. Eisenbergiella. id. 11304            | Weighted mode             | 8 | -0.0871 | 0.0819 | 0.3232 | 0.0151  | 0.0227 | 0.5292 | 7.0358  | 0.3175 | 34.8042  |
| CardioEmbolicStroke | genus. Enterorhabdus. id. 820               | MR Egger                  | 8 | -0.0423 | 0.1512 | 0.7891 | -0.0006 | 0.0207 | 0.9794 | 7.8096  | 0.2524 | 54.1130  |
| CardioEmbolicStroke | genus. Enterorhabdus. id. 820               | Weighted median           | 8 | -0.0637 | 0.0655 | 0.3314 | -0.0006 | 0.0207 | 0.9794 | 7.8096  | 0.2524 | 54.1130  |
| CardioEmbolicStroke | genus. Enterorhabdus. id. 820               | Inverse variance weighted | 8 | -0.0460 | 0.0545 | 0.3981 | -0.0006 | 0.0207 | 0.9794 | 7.8096  | 0.2524 | 54.1130  |
| CardioEmbolicStroke | genus. Enterorhabdus. id. 820               | Simple mode               | 8 | -0.0230 | 0.1033 | 0.8302 | -0.0006 | 0.0207 | 0.9794 | 7.8096  | 0.2524 | 54.1130  |
| CardioEmbolicStroke | genus. Enterorhabdus. id. 820               | Weighted mode             | 8 | -0.0678 | 0.0755 | 0.3990 | -0.0006 | 0.0207 | 0.9794 | 7.8096  | 0.2524 | 54.1130  |
| CardioEmbolicStroke | genus. Erysipelatoclostridium. id. 11381    | MR Egger                  | 8 | 0.0544  | 0.1152 | 0.6534 | 0.0091  | 0.0159 | 0.5884 | 3.1164  | 0.7941 | 52.3730  |
| CardioEmbolicStroke | genus. Erysipelatoclostridium. id. 11381    | Weighted median           | 8 | 0.0999  | 0.0581 | 0.0858 | 0.0091  | 0.0159 | 0.5884 | 3.1164  | 0.7941 | 52.3730  |
| CardioEmbolicStroke | genus. Erysipelatoclostridium. id. 11381    | Inverse variance weighted | 8 | 0.1150  | 0.0450 | 0.0106 | 0.0091  | 0.0159 | 0.5884 | 3.1164  | 0.7941 | 52.3730  |
| CardioEmbolicStroke | genus. Erysipelatoclostridium. id. 11381    | Simple mode               | 8 | 0.0542  | 0.0894 | 0.5633 | 0.0091  | 0.0159 | 0.5884 | 3.1164  | 0.7941 | 52.3730  |
| CardioEmbolicStroke | genus. Erysipelatoclostridium. id. 11381    | Weighted mode             | 8 | 0.0824  | 0.0562 | 0.1865 | 0.0091  | 0.0159 | 0.5884 | 3.1164  | 0.7941 | 52.3730  |
| CardioEmbolicStroke | genus. ErysipelotrichaceaeUCG003. id. 11384 | MR Egger                  | 8 | 0.0709  | 0.1031 | 0.5171 | -0.0091 | 0.0142 | 0.5478 | 7.3588  | 0.2889 | 75.8062  |
| CardioEmbolicStroke | genus. ErysipelotrichaceaeUCG003. id. 11384 | Weighted median           | 8 | 0.0351  | 0.0453 | 0.4381 | -0.0091 | 0.0142 | 0.5478 | 7.3588  | 0.2889 | 75.8062  |
| CardioEmbolicStroke | genus. ErysipelotrichaceaeUCG003. id. 11384 | Inverse variance weighted | 8 | 0.0105  | 0.0385 | 0.7852 | -0.0091 | 0.0142 | 0.5478 | 7.3588  | 0.2889 | 75.8062  |
| CardioEmbolicStroke | genus. ErysipelotrichaceaeUCG003. id. 11384 | Simple mode               | 8 | 0.0824  | 0.0846 | 0.3625 | -0.0091 | 0.0142 | 0.5478 | 7.3588  | 0.2889 | 75.8062  |

|                     |                                          |                           |   |         |        |        |         |        |        |         |        |         |
|---------------------|------------------------------------------|---------------------------|---|---------|--------|--------|---------|--------|--------|---------|--------|---------|
| CardioEmbolicStroke | genus.ErysipelotrichaceaeUCG003.id.11384 | Weighted mode             | 8 | 0.0434  | 0.0538 | 0.4466 | -0.0091 | 0.0142 | 0.5478 | 7.3588  | 0.2889 | 75.8062 |
| CardioEmbolicStroke | genus.Escherichia.Shigella.id.3504       | MR Egger                  | 8 | -0.1490 | 0.1255 | 0.2799 | 0.0197  | 0.0173 | 0.2985 | 10.7159 | 0.1515 | 59.3060 |
| CardioEmbolicStroke | genus.Escherichia.Shigella.id.3504       | Weighted median           | 8 | -0.0474 | 0.0513 | 0.3552 | 0.0197  | 0.0173 | 0.2985 | 10.7159 | 0.1515 | 59.3060 |
| CardioEmbolicStroke | genus.Escherichia.Shigella.id.3504       | Inverse variance weighted | 8 | -0.0176 | 0.0501 | 0.7258 | 0.0197  | 0.0173 | 0.2985 | 10.7159 | 0.1515 | 59.3060 |
| CardioEmbolicStroke | genus.Escherichia.Shigella.id.3504       | Simple mode               | 8 | -0.0488 | 0.0702 | 0.5096 | 0.0197  | 0.0173 | 0.2985 | 10.7159 | 0.1515 | 59.3060 |
| CardioEmbolicStroke | genus.Escherichia.Shigella.id.3504       | Weighted mode             | 8 | -0.0488 | 0.0553 | 0.4075 | 0.0197  | 0.0173 | 0.2985 | 10.7159 | 0.1515 | 59.3060 |
| CardioEmbolicStroke | genus.Faecalibacterium.id.2057           | MR Egger                  | 8 | -0.0364 | 0.1169 | 0.7661 | -0.0019 | 0.0161 | 0.9111 | 11.5540 | 0.0727 | 58.1798 |
| CardioEmbolicStroke | genus.Faecalibacterium.id.2057           | Weighted median           | 8 | -0.0581 | 0.0423 | 0.1692 | -0.0019 | 0.0161 | 0.9111 | 11.5540 | 0.0727 | 58.1798 |
| CardioEmbolicStroke | genus.Faecalibacterium.id.2057           | Inverse variance weighted | 8 | -0.0489 | 0.0424 | 0.2488 | -0.0019 | 0.0161 | 0.9111 | 11.5540 | 0.0727 | 58.1798 |
| CardioEmbolicStroke | genus.Faecalibacterium.id.2057           | Simple mode               | 8 | -0.0415 | 0.0739 | 0.5919 | -0.0019 | 0.0161 | 0.9111 | 11.5540 | 0.0727 | 58.1798 |
| CardioEmbolicStroke | genus.Faecalibacterium.id.2057           | Weighted mode             | 8 | -0.0515 | 0.0442 | 0.2826 | -0.0019 | 0.0161 | 0.9111 | 11.5540 | 0.0727 | 58.1798 |
| CardioEmbolicStroke | genus.FamilyXIIIAD3011group.id.11293     | MR Egger                  | 8 | -0.0158 | 0.1092 | 0.8894 | 0.0041  | 0.0150 | 0.7954 | 7.8467  | 0.2496 | 78.4228 |
| CardioEmbolicStroke | genus.FamilyXIIIAD3011group.id.11293     | Weighted median           | 8 | -0.0080 | 0.0477 | 0.8674 | 0.0041  | 0.0150 | 0.7954 | 7.8467  | 0.2496 | 78.4228 |
| CardioEmbolicStroke | genus.FamilyXIIIAD3011group.id.11293     | Inverse variance weighted | 8 | 0.0114  | 0.0397 | 0.7739 | 0.0041  | 0.0150 | 0.7954 | 7.8467  | 0.2496 | 78.4228 |
| CardioEmbolicStroke | genus.FamilyXIIIAD3011group.id.11293     | Simple mode               | 8 | -0.0768 | 0.0811 | 0.3752 | 0.0041  | 0.0150 | 0.7954 | 7.8467  | 0.2496 | 78.4228 |
| CardioEmbolicStroke | genus.FamilyXIIIAD3011group.id.11293     | Weighted mode             | 8 | -0.0183 | 0.0528 | 0.7389 | 0.0041  | 0.0150 | 0.7954 | 7.8467  | 0.2496 | 78.4228 |
| CardioEmbolicStroke | genus.FamilyXIIIIUCG001.id.11294         | MR Egger                  | 8 | -0.0882 | 0.1015 | 0.4180 | 0.0072  | 0.0139 | 0.6245 | 4.0140  | 0.6748 | 98.3073 |
| CardioEmbolicStroke | genus.FamilyXIIIIUCG001.id.11294         | Weighted median           | 8 | -0.0601 | 0.0490 | 0.2198 | 0.0072  | 0.0139 | 0.6245 | 4.0140  | 0.6748 | 98.3073 |
| CardioEmbolicStroke | genus.FamilyXIIIIUCG001.id.11294         | Inverse variance weighted | 8 | -0.0400 | 0.0395 | 0.3108 | 0.0072  | 0.0139 | 0.6245 | 4.0140  | 0.6748 | 98.3073 |
| CardioEmbolicStroke | genus.FamilyXIIIIUCG001.id.11294         | Simple mode               | 8 | -0.0728 | 0.0820 | 0.4041 | 0.0072  | 0.0139 | 0.6245 | 4.0140  | 0.6748 | 98.3073 |
| CardioEmbolicStroke | genus.FamilyXIIIIUCG001.id.11294         | Weighted mode             | 8 | -0.0639 | 0.0541 | 0.2755 | 0.0072  | 0.0139 | 0.6245 | 4.0140  | 0.6748 | 98.3073 |
| CardioEmbolicStroke | genus.Flavonifractor.id.2059             | MR Egger                  | 8 | -0.0609 | 0.1571 | 0.7116 | 0.0067  | 0.0217 | 0.7672 | 12.5791 | 0.0502 | 43.5452 |
| CardioEmbolicStroke | genus.Flavonifractor.id.2059             | Weighted median           | 8 | 0.0088  | 0.0529 | 0.8683 | 0.0067  | 0.0217 | 0.7672 | 12.5791 | 0.0502 | 43.5452 |
| CardioEmbolicStroke | genus.Flavonifractor.id.2059             | Inverse variance weighted | 8 | -0.0161 | 0.0574 | 0.7786 | 0.0067  | 0.0217 | 0.7672 | 12.5791 | 0.0502 | 43.5452 |
| CardioEmbolicStroke | genus.Flavonifractor.id.2059             | Simple mode               | 8 | 0.0831  | 0.0845 | 0.3581 | 0.0067  | 0.0217 | 0.7672 | 12.5791 | 0.0502 | 43.5452 |
| CardioEmbolicStroke | genus.Flavonifractor.id.2059             | Weighted mode             | 8 | 0.0104  | 0.0582 | 0.8633 | 0.0067  | 0.0217 | 0.7672 | 12.5791 | 0.0502 | 43.5452 |
| CardioEmbolicStroke | genus.Fusicatenibacter.id.11305          | MR Egger                  | 8 | 0.0029  | 0.1023 | 0.9780 | 0.0018  | 0.0141 | 0.9049 | 8.4911  | 0.2043 | 70.9661 |
| CardioEmbolicStroke | genus.Fusicatenibacter.id.11305          | Weighted median           | 8 | 0.0417  | 0.0416 | 0.3164 | 0.0018  | 0.0141 | 0.9049 | 8.4911  | 0.2043 | 70.9661 |
| CardioEmbolicStroke | genus.Fusicatenibacter.id.11305          | Inverse variance weighted | 8 | 0.0147  | 0.0371 | 0.6925 | 0.0018  | 0.0141 | 0.9049 | 8.4911  | 0.2043 | 70.9661 |
| CardioEmbolicStroke | genus.Fusicatenibacter.id.11305          | Simple mode               | 8 | 0.0792  | 0.0697 | 0.2932 | 0.0018  | 0.0141 | 0.9049 | 8.4911  | 0.2043 | 70.9661 |
| CardioEmbolicStroke | genus.Fusicatenibacter.id.11305          | Weighted mode             | 8 | 0.0514  | 0.0438 | 0.2796 | 0.0018  | 0.0141 | 0.9049 | 8.4911  | 0.2043 | 70.9661 |
| CardioEmbolicStroke | genus.Gordonibacter.id.821               | MR Egger                  | 8 | 0.3097  | 0.2783 | 0.3083 | -0.0247 | 0.0384 | 0.5434 | 13.3983 | 0.0371 | 14.4964 |
| CardioEmbolicStroke | genus.Gordonibacter.id.821               | Weighted median           | 8 | 0.1942  | 0.0902 | 0.0313 | -0.0247 | 0.0384 | 0.5434 | 13.3983 | 0.0371 | 14.4964 |
| CardioEmbolicStroke | genus.Gordonibacter.id.821               | Inverse variance weighted | 8 | 0.1448  | 0.1041 | 0.1642 | -0.0247 | 0.0384 | 0.5434 | 13.3983 | 0.0371 | 14.4964 |
| CardioEmbolicStroke | genus.Gordonibacter.id.821               | Simple mode               | 8 | 0.1448  | 0.1395 | 0.3338 | -0.0247 | 0.0384 | 0.5434 | 13.3983 | 0.0371 | 14.4964 |
| CardioEmbolicStroke | genus.Gordonibacter.id.821               | Weighted mode             | 8 | 0.1787  | 0.0963 | 0.1059 | -0.0247 | 0.0384 | 0.5434 | 13.3983 | 0.0371 | 14.4964 |
| CardioEmbolicStroke | genus.Haemophilus.id.3698                | MR Egger                  | 8 | 0.1321  | 0.1186 | 0.3081 | -0.0111 | 0.0164 | 0.5238 | 6.0915  | 0.4130 | 54.8888 |
| CardioEmbolicStroke | genus.Haemophilus.id.3698                | Weighted median           | 8 | 0.0690  | 0.0589 | 0.2414 | -0.0111 | 0.0164 | 0.5238 | 6.0915  | 0.4130 | 54.8888 |
| CardioEmbolicStroke | genus.Haemophilus.id.3698                | Inverse variance weighted | 8 | 0.0583  | 0.0462 | 0.2071 | -0.0111 | 0.0164 | 0.5238 | 6.0915  | 0.4130 | 54.8888 |
| CardioEmbolicStroke | genus.Haemophilus.id.3698                | Simple mode               | 8 | -0.0471 | 0.1069 | 0.6727 | -0.0111 | 0.0164 | 0.5238 | 6.0915  | 0.4130 | 54.8888 |
| CardioEmbolicStroke | genus.Haemophilus.id.3698                | Weighted mode             | 8 | 0.0701  | 0.0641 | 0.3105 | -0.0111 | 0.0164 | 0.5238 | 6.0915  | 0.4130 | 54.8888 |
| CardioEmbolicStroke | genus.Holdemanella.id.11393              | MR Egger                  | 8 | 0.0277  | 0.1297 | 0.8382 | 0.0085  | 0.0179 | 0.6517 | 5.0391  | 0.5388 | 51.1776 |
| CardioEmbolicStroke | genus.Holdemanella.id.11393              | Weighted median           | 8 | 0.0733  | 0.0625 | 0.2408 | 0.0085  | 0.0179 | 0.6517 | 5.0391  | 0.5388 | 51.1776 |
| CardioEmbolicStroke | genus.Holdemanella.id.11393              | Inverse variance weighted | 8 | 0.0843  | 0.0506 | 0.0956 | 0.0085  | 0.0179 | 0.6517 | 5.0391  | 0.5388 | 51.1776 |
| CardioEmbolicStroke | genus.Holdemanella.id.11393              | Simple mode               | 8 | 0.0766  | 0.0987 | 0.4628 | 0.0085  | 0.0179 | 0.6517 | 5.0391  | 0.5388 | 51.1776 |
| CardioEmbolicStroke | genus.Holdemanella.id.11393              | Weighted mode             | 8 | 0.0725  | 0.0736 | 0.3570 | 0.0085  | 0.0179 | 0.6517 | 5.0391  | 0.5388 | 51.1776 |
| CardioEmbolicStroke | genus.Holdemanella.id.11393              | MR Egger                  | 8 | 0.0688  | 0.1192 | 0.5847 | -0.0025 | 0.0164 | 0.8862 | 5.6995  | 0.4577 | 67.3850 |
| CardioEmbolicStroke | genus.Holdemanella.id.11393              | Weighted median           | 8 | 0.0716  | 0.0610 | 0.2406 | -0.0025 | 0.0164 | 0.8862 | 5.6995  | 0.4577 | 67.3850 |
| CardioEmbolicStroke | genus.Holdemanella.id.11393              | Inverse variance weighted | 8 | 0.0524  | 0.0465 | 0.2598 | -0.0025 | 0.0164 | 0.8862 | 5.6995  | 0.4577 | 67.3850 |
| CardioEmbolicStroke | genus.Holdemanella.id.11393              | Simple mode               | 8 | 0.0746  | 0.0926 | 0.4470 | -0.0025 | 0.0164 | 0.8862 | 5.6995  | 0.4577 | 67.3850 |
| CardioEmbolicStroke | genus.Holdemanella.id.11393              | Weighted mode             | 8 | 0.0777  | 0.0671 | 0.2850 | -0.0025 | 0.0164 | 0.8862 | 5.6995  | 0.4577 | 67.3850 |
| CardioEmbolicStroke | genus.Howardella.id.2000                 | MR Egger                  | 8 | -0.0389 | 0.1841 | 0.8398 | 0.0072  | 0.0254 | 0.7856 | 3.0973  | 0.7965 | 61.0777 |
| CardioEmbolicStroke | genus.Howardella.id.2000                 | Weighted median           | 8 | -0.0105 | 0.0878 | 0.9046 | 0.0072  | 0.0254 | 0.7856 | 3.0973  | 0.7965 | 61.0777 |
| CardioEmbolicStroke | genus.Howardella.id.2000                 | Inverse variance weighted | 8 | 0.0093  | 0.0719 | 0.8967 | 0.0072  | 0.0254 | 0.7856 | 3.0973  | 0.7965 | 61.0777 |
| CardioEmbolicStroke | genus.Howardella.id.2000                 | Simple mode               | 8 | 0.1472  | 0.1358 | 0.3146 | 0.0072  | 0.0254 | 0.7856 | 3.0973  | 0.7965 | 61.0777 |
| CardioEmbolicStroke | genus.Howardella.id.2000                 | Weighted mode             | 8 | -0.0168 | 0.1009 | 0.8722 | 0.0072  | 0.0254 | 0.7856 | 3.0973  | 0.7965 | 61.0777 |
| CardioEmbolicStroke | genus.Hungatella.id.11306                | MR Egger                  | 8 | -0.1106 | 0.1758 | 0.5524 | 0.0210  | 0.0244 | 0.4222 | 6.2275  | 0.3982 | 40.9146 |
| CardioEmbolicStroke | genus.Hungatella.id.11306                | Weighted median           | 8 | -0.0210 | 0.0845 | 0.8038 | 0.0210  | 0.0244 | 0.4222 | 6.2275  | 0.3982 | 40.9146 |

|                     |                                            |                           |   |         |        |        |         |        |        |         |        |          |
|---------------------|--------------------------------------------|---------------------------|---|---------|--------|--------|---------|--------|--------|---------|--------|----------|
| CardioEmbolicStroke | genus.Hungatella.id.11306                  | Inverse variance weighted | 8 | 0.0286  | 0.0678 | 0.6730 | 0.0210  | 0.0244 | 0.4222 | 6.2275  | 0.3982 | 40.9146  |
| CardioEmbolicStroke | genus.Hungatella.id.11306                  | Simple mode               | 8 | -0.0357 | 0.1374 | 0.8022 | 0.0210  | 0.0244 | 0.4222 | 6.2275  | 0.3982 | 40.9146  |
| CardioEmbolicStroke | genus.Hungatella.id.11306                  | Weighted mode             | 8 | -0.0231 | 0.0917 | 0.8088 | 0.0210  | 0.0244 | 0.4222 | 6.2275  | 0.3982 | 40.9146  |
| CardioEmbolicStroke | genus.Intestinibacter.id.11345             | MR Egger                  | 8 | -0.0517 | 0.1028 | 0.6328 | 0.0174  | 0.0142 | 0.2644 | 4.6369  | 0.7042 | 73.6185  |
| CardioEmbolicStroke | genus.Intestinibacter.id.11345             | Weighted median           | 8 | 0.0110  | 0.0527 | 0.8346 | 0.0174  | 0.0142 | 0.2644 | 4.6369  | 0.7042 | 73.6185  |
| CardioEmbolicStroke | genus.Intestinibacter.id.11345             | Inverse variance weighted | 8 | 0.0648  | 0.0401 | 0.1062 | 0.0174  | 0.0142 | 0.2644 | 4.6369  | 0.7042 | 73.6185  |
| CardioEmbolicStroke | genus.Intestinibacter.id.11345             | Simple mode               | 8 | 0.0257  | 0.0958 | 0.7960 | 0.0174  | 0.0142 | 0.2644 | 4.6369  | 0.7042 | 73.6185  |
| CardioEmbolicStroke | genus.Intestinibacter.id.11345             | Weighted mode             | 8 | 0.0075  | 0.0535 | 0.8921 | 0.0174  | 0.0142 | 0.2644 | 4.6369  | 0.7042 | 73.6185  |
| CardioEmbolicStroke | genus.Intestinimonas.id.2062               | MR Egger                  | 8 | -0.1688 | 0.1269 | 0.2317 | 0.0138  | 0.0175 | 0.4618 | 9.0639  | 0.1700 | 40.9298  |
| CardioEmbolicStroke | genus.Intestinimonas.id.2062               | Weighted median           | 8 | -0.0841 | 0.0526 | 0.1100 | 0.0138  | 0.0175 | 0.4618 | 9.0639  | 0.1700 | 40.9298  |
| CardioEmbolicStroke | genus.Intestinimonas.id.2062               | Inverse variance weighted | 8 | -0.0770 | 0.0482 | 0.1103 | 0.0138  | 0.0175 | 0.4618 | 9.0639  | 0.1700 | 40.9298  |
| CardioEmbolicStroke | genus.Intestinimonas.id.2062               | Simple mode               | 8 | -0.0796 | 0.0852 | 0.3818 | 0.0138  | 0.0175 | 0.4618 | 9.0639  | 0.1700 | 40.9298  |
| CardioEmbolicStroke | genus.Intestinimonas.id.2062               | Weighted mode             | 8 | -0.0894 | 0.0575 | 0.1639 | 0.0138  | 0.0175 | 0.4618 | 9.0639  | 0.1700 | 40.9298  |
| CardioEmbolicStroke | genus.Lachnoclostridium.id.11308           | MR Egger                  | 8 | -0.0754 | 0.0845 | 0.4070 | 0.0003  | 0.0117 | 0.9788 | 5.6217  | 0.4669 | 70.9427  |
| CardioEmbolicStroke | genus.Lachnoclostridium.id.11308           | Weighted median           | 8 | -0.0770 | 0.0433 | 0.0750 | 0.0003  | 0.0117 | 0.9788 | 5.6217  | 0.4669 | 70.9427  |
| CardioEmbolicStroke | genus.Lachnoclostridium.id.11308           | Inverse variance weighted | 8 | -0.0732 | 0.0331 | 0.0270 | 0.0003  | 0.0117 | 0.9788 | 5.6217  | 0.4669 | 70.9427  |
| CardioEmbolicStroke | genus.Lachnoclostridium.id.11308           | Simple mode               | 8 | -0.1348 | 0.0732 | 0.1083 | 0.0003  | 0.0117 | 0.9788 | 5.6217  | 0.4669 | 70.9427  |
| CardioEmbolicStroke | genus.Lachnoclostridium.id.11308           | Weighted mode             | 8 | -0.0836 | 0.0473 | 0.1209 | 0.0003  | 0.0117 | 0.9788 | 5.6217  | 0.4669 | 70.9427  |
| CardioEmbolicStroke | genus.Lachnospira.id.2004                  | MR Egger                  | 8 | 0.0395  | 0.1223 | 0.7577 | -0.0057 | 0.0169 | 0.7467 | 11.5767 | 0.0721 | 59.7577  |
| CardioEmbolicStroke | genus.Lachnospira.id.2004                  | Weighted median           | 8 | 0.0168  | 0.0415 | 0.6862 | -0.0057 | 0.0169 | 0.7467 | 11.5767 | 0.0721 | 59.7577  |
| CardioEmbolicStroke | genus.Lachnospira.id.2004                  | Inverse variance weighted | 8 | 0.0014  | 0.0448 | 0.9745 | -0.0057 | 0.0169 | 0.7467 | 11.5767 | 0.0721 | 59.7577  |
| CardioEmbolicStroke | genus.Lachnospira.id.2004                  | Simple mode               | 8 | -0.0189 | 0.0667 | 0.7848 | -0.0057 | 0.0169 | 0.7467 | 11.5767 | 0.0721 | 59.7577  |
| CardioEmbolicStroke | genus.Lachnospira.id.2004                  | Weighted mode             | 8 | 0.0157  | 0.0490 | 0.7580 | -0.0057 | 0.0169 | 0.7467 | 11.5767 | 0.0721 | 59.7577  |
| CardioEmbolicStroke | genus.LachnospiraceaeFCS020group.id.11314  | MR Egger                  | 8 | 0.0198  | 0.1564 | 0.9033 | 0.0105  | 0.0215 | 0.6443 | 15.4871 | 0.0168 | 37.1063  |
| CardioEmbolicStroke | genus.LachnospiraceaeFCS020group.id.11314  | Weighted median           | 8 | 0.0417  | 0.0465 | 0.3693 | 0.0105  | 0.0215 | 0.6443 | 15.4871 | 0.0168 | 37.1063  |
| CardioEmbolicStroke | genus.LachnospiraceaeFCS020group.id.11314  | Inverse variance weighted | 8 | 0.0898  | 0.0576 | 0.1186 | 0.0105  | 0.0215 | 0.6443 | 15.4871 | 0.0168 | 37.1063  |
| CardioEmbolicStroke | genus.LachnospiraceaeFCS020group.id.11314  | Simple mode               | 8 | 0.0019  | 0.0684 | 0.9788 | 0.0105  | 0.0215 | 0.6443 | 15.4871 | 0.0168 | 37.1063  |
| CardioEmbolicStroke | genus.LachnospiraceaeFCS020group.id.11314  | Weighted mode             | 8 | 0.0325  | 0.0518 | 0.5502 | 0.0105  | 0.0215 | 0.6443 | 15.4871 | 0.0168 | 37.1063  |
| CardioEmbolicStroke | genus.LachnospiraceaeNC2004group.id.11316  | MR Egger                  | 8 | 0.0599  | 0.1588 | 0.7189 | -0.0160 | 0.0220 | 0.4957 | 7.6426  | 0.2655 | 38.9612  |
| CardioEmbolicStroke | genus.LachnospiraceaeNC2004group.id.11316  | Weighted median           | 8 | -0.0483 | 0.0698 | 0.4888 | -0.0160 | 0.0220 | 0.4957 | 7.6426  | 0.2655 | 38.9612  |
| CardioEmbolicStroke | genus.LachnospiraceaeNC2004group.id.11316  | Inverse variance weighted | 8 | -0.0460 | 0.0601 | 0.4441 | -0.0160 | 0.0220 | 0.4957 | 7.6426  | 0.2655 | 38.9612  |
| CardioEmbolicStroke | genus.LachnospiraceaeNC2004group.id.11316  | Simple mode               | 8 | -0.1181 | 0.1404 | 0.4282 | -0.0160 | 0.0220 | 0.4957 | 7.6426  | 0.2655 | 38.9612  |
| CardioEmbolicStroke | genus.LachnospiraceaeNC2004group.id.11316  | Weighted mode             | 8 | -0.0060 | 0.0788 | 0.9411 | -0.0160 | 0.0220 | 0.4957 | 7.6426  | 0.2655 | 38.9612  |
| CardioEmbolicStroke | genus.LachnospiraceaeND3007group.id.11317  | MR Egger                  | 8 | 0.1012  | 0.0917 | 0.3120 | -0.0083 | 0.0127 | 0.5365 | 2.0503  | 0.9150 | 121.9893 |
| CardioEmbolicStroke | genus.LachnospiraceaeND3007group.id.11317  | Weighted median           | 8 | 0.0681  | 0.0466 | 0.1436 | -0.0083 | 0.0127 | 0.5365 | 2.0503  | 0.9150 | 121.9893 |
| CardioEmbolicStroke | genus.LachnospiraceaeND3007group.id.11317  | Inverse variance weighted | 8 | 0.0459  | 0.0359 | 0.2006 | -0.0083 | 0.0127 | 0.5365 | 2.0503  | 0.9150 | 121.9893 |
| CardioEmbolicStroke | genus.LachnospiraceaeND3007group.id.11317  | Simple mode               | 8 | 0.0385  | 0.0722 | 0.6106 | -0.0083 | 0.0127 | 0.5365 | 2.0503  | 0.9150 | 121.9893 |
| CardioEmbolicStroke | genus.LachnospiraceaeND3007group.id.11317  | Weighted mode             | 8 | 0.0749  | 0.0504 | 0.1804 | -0.0083 | 0.0127 | 0.5365 | 2.0503  | 0.9150 | 121.9893 |
| CardioEmbolicStroke | genus.LachnospiraceaeNK4A136group.id.11319 | MR Egger                  | 8 | -0.0117 | 0.0864 | 0.8965 | -0.0104 | 0.0119 | 0.4159 | 4.6558  | 0.5887 | 66.7067  |
| CardioEmbolicStroke | genus.LachnospiraceaeNK4A136group.id.11319 | Weighted median           | 8 | -0.0620 | 0.0439 | 0.1582 | -0.0104 | 0.0119 | 0.4159 | 4.6558  | 0.5887 | 66.7067  |
| CardioEmbolicStroke | genus.LachnospiraceaeNK4A136group.id.11319 | Inverse variance weighted | 8 | -0.0812 | 0.0338 | 0.0163 | -0.0104 | 0.0119 | 0.4159 | 4.6558  | 0.5887 | 66.7067  |
| CardioEmbolicStroke | genus.LachnospiraceaeNK4A136group.id.11319 | Simple mode               | 8 | -0.0842 | 0.0695 | 0.2649 | -0.0104 | 0.0119 | 0.4159 | 4.6558  | 0.5887 | 66.7067  |
| CardioEmbolicStroke | genus.LachnospiraceaeNK4A136group.id.11319 | Weighted mode             | 8 | -0.0575 | 0.0472 | 0.2620 | -0.0104 | 0.0119 | 0.4159 | 4.6558  | 0.5887 | 66.7067  |
| CardioEmbolicStroke | genus.LachnospiraceaeUCG001.id.11321       | MR Egger                  | 8 | 0.0515  | 0.1720 | 0.7747 | -0.0103 | 0.0237 | 0.6778 | 13.8801 | 0.0310 | 35.6630  |
| CardioEmbolicStroke | genus.LachnospiraceaeUCG001.id.11321       | Weighted median           | 8 | 0.0083  | 0.0565 | 0.8836 | -0.0103 | 0.0237 | 0.6778 | 13.8801 | 0.0310 | 35.6630  |
| CardioEmbolicStroke | genus.LachnospiraceaeUCG001.id.11321       | Inverse variance weighted | 8 | -0.0176 | 0.0632 | 0.7807 | -0.0103 | 0.0237 | 0.6778 | 13.8801 | 0.0310 | 35.6630  |
| CardioEmbolicStroke | genus.LachnospiraceaeUCG001.id.11321       | Simple mode               | 8 | 0.0127  | 0.0820 | 0.8812 | -0.0103 | 0.0237 | 0.6778 | 13.8801 | 0.0310 | 35.6630  |
| CardioEmbolicStroke | genus.LachnospiraceaeUCG001.id.11321       | Weighted mode             | 8 | 0.0127  | 0.0587 | 0.8349 | -0.0103 | 0.0237 | 0.6778 | 13.8801 | 0.0310 | 35.6630  |
| CardioEmbolicStroke | genus.LachnospiraceaeUCG004.id.11324       | MR Egger                  | 8 | 0.0876  | 0.0936 | 0.3855 | -0.0086 | 0.0130 | 0.5297 | 5.1387  | 0.5261 | 94.4856  |
| CardioEmbolicStroke | genus.LachnospiraceaeUCG004.id.11324       | Weighted median           | 8 | 0.0365  | 0.0475 | 0.4426 | -0.0086 | 0.0130 | 0.5297 | 5.1387  | 0.5261 | 94.4856  |
| CardioEmbolicStroke | genus.LachnospiraceaeUCG004.id.11324       | Inverse variance weighted | 8 | 0.0302  | 0.0367 | 0.4111 | -0.0086 | 0.0130 | 0.5297 | 5.1387  | 0.5261 | 94.4856  |
| CardioEmbolicStroke | genus.LachnospiraceaeUCG004.id.11324       | Simple mode               | 8 | 0.0603  | 0.0794 | 0.4722 | -0.0086 | 0.0130 | 0.5297 | 5.1387  | 0.5261 | 94.4856  |
| CardioEmbolicStroke | genus.LachnospiraceaeUCG004.id.11324       | Weighted mode             | 8 | 0.0427  | 0.0494 | 0.4164 | -0.0086 | 0.0130 | 0.5297 | 5.1387  | 0.5261 | 94.4856  |
| CardioEmbolicStroke | genus.LachnospiraceaeUCG008.id.11328       | MR Egger                  | 8 | 0.0309  | 0.1352 | 0.8269 | -0.0008 | 0.0186 | 0.9688 | 0.2066  | 0.9998 | 291.3311 |
| CardioEmbolicStroke | genus.LachnospiraceaeUCG008.id.11328       | Weighted median           | 8 | 0.0265  | 0.0662 | 0.6894 | -0.0008 | 0.0186 | 0.9688 | 0.2066  | 0.9998 | 291.3311 |
| CardioEmbolicStroke | genus.LachnospiraceaeUCG008.id.11328       | Inverse variance weighted | 8 | 0.0258  | 0.0528 | 0.6247 | -0.0008 | 0.0186 | 0.9688 | 0.2066  | 0.9998 | 291.3311 |
| CardioEmbolicStroke | genus.LachnospiraceaeUCG008.id.11328       | Simple mode               | 8 | 0.0186  | 0.0895 | 0.8411 | -0.0008 | 0.0186 | 0.9688 | 0.2066  | 0.9998 | 291.3311 |
| CardioEmbolicStroke | genus.LachnospiraceaeUCG008.id.11328       | Weighted mode             | 8 | 0.0259  | 0.0718 | 0.7292 | -0.0008 | 0.0186 | 0.9688 | 0.2066  | 0.9998 | 291.3311 |

|                     |                                         |                           |   |         |        |        |         |        |        |         |        |         |
|---------------------|-----------------------------------------|---------------------------|---|---------|--------|--------|---------|--------|--------|---------|--------|---------|
| CardioEmbolicStroke | genus. LachnospiraceaeUCG010. id. 11330 | MR Egger                  | 8 | 0.1309  | 0.0984 | 0.2317 | -0.0230 | 0.0136 | 0.1410 | 7.6529  | 0.3642 | 77.5059 |
| CardioEmbolicStroke | genus. LachnospiraceaeUCG010. id. 11330 | Weighted median           | 8 | 0.0117  | 0.0512 | 0.8187 | -0.0230 | 0.0136 | 0.1410 | 7.6529  | 0.3642 | 77.5059 |
| CardioEmbolicStroke | genus. LachnospiraceaeUCG010. id. 11330 | Inverse variance weighted | 8 | -0.0226 | 0.0402 | 0.5750 | -0.0230 | 0.0136 | 0.1410 | 7.6529  | 0.3642 | 77.5059 |
| CardioEmbolicStroke | genus. LachnospiraceaeUCG010. id. 11330 | Simple mode               | 8 | -0.1431 | 0.1111 | 0.2385 | -0.0230 | 0.0136 | 0.1410 | 7.6529  | 0.3642 | 77.5059 |
| CardioEmbolicStroke | genus. LachnospiraceaeUCG010. id. 11330 | Weighted mode             | 8 | 0.0465  | 0.0527 | 0.4067 | -0.0230 | 0.0136 | 0.1410 | 7.6529  | 0.3642 | 77.5059 |
| CardioEmbolicStroke | genus. Lactobacillus. id. 1837          | MR Egger                  | 8 | -0.1138 | 0.2051 | 0.5992 | 0.0203  | 0.0283 | 0.5007 | 13.6362 | 0.0340 | 35.2659 |
| CardioEmbolicStroke | genus. Lactobacillus. id. 1837          | Weighted median           | 8 | -0.0235 | 0.0670 | 0.7262 | 0.0203  | 0.0283 | 0.5007 | 13.6362 | 0.0340 | 35.2659 |
| CardioEmbolicStroke | genus. Lactobacillus. id. 1837          | Inverse variance weighted | 8 | 0.0215  | 0.0772 | 0.7804 | 0.0203  | 0.0283 | 0.5007 | 13.6362 | 0.0340 | 35.2659 |
| CardioEmbolicStroke | genus. Lactobacillus. id. 1837          | Simple mode               | 8 | -0.0847 | 0.1080 | 0.4587 | 0.0203  | 0.0283 | 0.5007 | 13.6362 | 0.0340 | 35.2659 |
| CardioEmbolicStroke | genus. Lactobacillus. id. 1837          | Weighted mode             | 8 | -0.0123 | 0.0734 | 0.8712 | 0.0203  | 0.0283 | 0.5007 | 13.6362 | 0.0340 | 35.2659 |
| CardioEmbolicStroke | genus. Lactococcus. id. 1851            | MR Egger                  | 8 | 0.3763  | 0.1774 | 0.0782 | -0.0482 | 0.0245 | 0.0972 | 5.6462  | 0.5816 | 41.0793 |
| CardioEmbolicStroke | genus. Lactococcus. id. 1851            | Weighted median           | 8 | 0.1549  | 0.0853 | 0.0694 | -0.0482 | 0.0245 | 0.0972 | 5.6462  | 0.5816 | 41.0793 |
| CardioEmbolicStroke | genus. Lactococcus. id. 1851            | Inverse variance weighted | 8 | 0.0556  | 0.0694 | 0.4227 | -0.0482 | 0.0245 | 0.0972 | 5.6462  | 0.5816 | 41.0793 |
| CardioEmbolicStroke | genus. Lactococcus. id. 1851            | Simple mode               | 8 | 0.1357  | 0.1598 | 0.4238 | -0.0482 | 0.0245 | 0.0972 | 5.6462  | 0.5816 | 41.0793 |
| CardioEmbolicStroke | genus. Lactococcus. id. 1851            | Weighted mode             | 8 | 0.1534  | 0.0942 | 0.1477 | -0.0482 | 0.0245 | 0.0972 | 5.6462  | 0.5816 | 41.0793 |
| CardioEmbolicStroke | genus. Marvinbryantia. id. 2005         | MR Egger                  | 8 | 0.0093  | 0.1050 | 0.9326 | -0.0031 | 0.0144 | 0.8394 | 4.2015  | 0.6494 | 95.9663 |
| CardioEmbolicStroke | genus. Marvinbryantia. id. 2005         | Weighted median           | 8 | -0.0063 | 0.0533 | 0.9057 | -0.0031 | 0.0144 | 0.8394 | 4.2015  | 0.6494 | 95.9663 |
| CardioEmbolicStroke | genus. Marvinbryantia. id. 2005         | Inverse variance weighted | 8 | -0.0112 | 0.0409 | 0.7839 | -0.0031 | 0.0144 | 0.8394 | 4.2015  | 0.6494 | 95.9663 |
| CardioEmbolicStroke | genus. Marvinbryantia. id. 2005         | Simple mode               | 8 | -0.0320 | 0.0858 | 0.7205 | -0.0031 | 0.0144 | 0.8394 | 4.2015  | 0.6494 | 95.9663 |
| CardioEmbolicStroke | genus. Marvinbryantia. id. 2005         | Weighted mode             | 8 | 0.0140  | 0.0563 | 0.8112 | -0.0031 | 0.0144 | 0.8394 | 4.2015  | 0.6494 | 95.9663 |
| CardioEmbolicStroke | genus. Methanobrevibacter. id. 123      | MR Egger                  | 8 | 0.0258  | 0.1892 | 0.8960 | -0.0081 | 0.0262 | 0.7665 | 4.3175  | 0.6338 | 43.3580 |
| CardioEmbolicStroke | genus. Methanobrevibacter. id. 123      | Weighted median           | 8 | -0.0188 | 0.0944 | 0.8419 | -0.0081 | 0.0262 | 0.7665 | 4.3175  | 0.6338 | 43.3580 |
| CardioEmbolicStroke | genus. Methanobrevibacter. id. 123      | Inverse variance weighted | 8 | -0.0283 | 0.0740 | 0.7025 | -0.0081 | 0.0262 | 0.7665 | 4.3175  | 0.6338 | 43.3580 |
| CardioEmbolicStroke | genus. Methanobrevibacter. id. 123      | Simple mode               | 8 | 0.0347  | 0.1506 | 0.8244 | -0.0081 | 0.0262 | 0.7665 | 4.3175  | 0.6338 | 43.3580 |
| CardioEmbolicStroke | genus. Methanobrevibacter. id. 123      | Weighted mode             | 8 | -0.0010 | 0.1074 | 0.9929 | -0.0081 | 0.0262 | 0.7665 | 4.3175  | 0.6338 | 43.3580 |
| CardioEmbolicStroke | genus. Odoribacter. id. 952             | MR Egger                  | 8 | -0.0117 | 0.0938 | 0.9049 | 0.0052  | 0.0129 | 0.6999 | 5.6545  | 0.4630 | 86.9581 |
| CardioEmbolicStroke | genus. Odoribacter. id. 952             | Weighted median           | 8 | -0.0026 | 0.0465 | 0.9550 | 0.0052  | 0.0129 | 0.6999 | 5.6545  | 0.4630 | 86.9581 |
| CardioEmbolicStroke | genus. Odoribacter. id. 952             | Inverse variance weighted | 8 | 0.0232  | 0.0366 | 0.5259 | 0.0052  | 0.0129 | 0.6999 | 5.6545  | 0.4630 | 86.9581 |
| CardioEmbolicStroke | genus. Odoribacter. id. 952             | Simple mode               | 8 | 0.0127  | 0.0804 | 0.8793 | 0.0052  | 0.0129 | 0.6999 | 5.6545  | 0.4630 | 86.9581 |
| CardioEmbolicStroke | genus. Odoribacter. id. 952             | Weighted mode             | 8 | -0.0007 | 0.0501 | 0.9896 | 0.0052  | 0.0129 | 0.6999 | 5.6545  | 0.4630 | 86.9581 |
| CardioEmbolicStroke | genus. Olsenella. id. 822               | MR Egger                  | 8 | -0.0529 | 0.1901 | 0.7903 | 0.0169  | 0.0259 | 0.5380 | 2.6635  | 0.8497 | 42.8636 |
| CardioEmbolicStroke | genus. Olsenella. id. 822               | Weighted median           | 8 | 0.0174  | 0.0935 | 0.8525 | 0.0169  | 0.0259 | 0.5380 | 2.6635  | 0.8497 | 42.8636 |
| CardioEmbolicStroke | genus. Olsenella. id. 822               | Inverse variance weighted | 8 | 0.0616  | 0.0735 | 0.4017 | 0.0169  | 0.0259 | 0.5380 | 2.6635  | 0.8497 | 42.8636 |
| CardioEmbolicStroke | genus. Olsenella. id. 822               | Simple mode               | 8 | 0.0333  | 0.1405 | 0.8193 | 0.0169  | 0.0259 | 0.5380 | 2.6635  | 0.8497 | 42.8636 |
| CardioEmbolicStroke | genus. Olsenella. id. 822               | Weighted mode             | 8 | 0.0085  | 0.1044 | 0.9370 | 0.0169  | 0.0259 | 0.5380 | 2.6635  | 0.8497 | 42.8636 |
| CardioEmbolicStroke | genus. Oscillibacter. id. 2063          | MR Egger                  | 8 | -0.2819 | 0.1543 | 0.1176 | 0.0260  | 0.0212 | 0.2673 | 12.2110 | 0.0938 | 32.6463 |
| CardioEmbolicStroke | genus. Oscillibacter. id. 2063          | Weighted median           | 8 | -0.1520 | 0.0636 | 0.0169 | 0.0260  | 0.0212 | 0.2673 | 12.2110 | 0.0938 | 32.6463 |
| CardioEmbolicStroke | genus. Oscillibacter. id. 2063          | Inverse variance weighted | 8 | -0.1081 | 0.0622 | 0.0823 | 0.0260  | 0.0212 | 0.2673 | 12.2110 | 0.0938 | 32.6463 |
| CardioEmbolicStroke | genus. Oscillibacter. id. 2063          | Simple mode               | 8 | -0.2059 | 0.1192 | 0.1276 | 0.0260  | 0.0212 | 0.2673 | 12.2110 | 0.0938 | 32.6463 |
| CardioEmbolicStroke | genus. Oscillibacter. id. 2063          | Weighted mode             | 8 | -0.1796 | 0.0618 | 0.0228 | 0.0260  | 0.0212 | 0.2673 | 12.2110 | 0.0938 | 32.6463 |
| CardioEmbolicStroke | genus. Oscillospira. id. 2064           | MR Egger                  | 8 | 0.1875  | 0.1332 | 0.2089 | -0.0254 | 0.0184 | 0.2167 | 11.1154 | 0.1337 | 48.6268 |
| CardioEmbolicStroke | genus. Oscillospira. id. 2064           | Weighted median           | 8 | 0.0684  | 0.0605 | 0.2583 | -0.0254 | 0.0184 | 0.2167 | 11.1154 | 0.1337 | 48.6268 |
| CardioEmbolicStroke | genus. Oscillospira. id. 2064           | Inverse variance weighted | 8 | 0.0182  | 0.0553 | 0.7416 | -0.0254 | 0.0184 | 0.2167 | 11.1154 | 0.1337 | 48.6268 |
| CardioEmbolicStroke | genus. Oscillospira. id. 2064           | Simple mode               | 8 | -0.0752 | 0.1338 | 0.5918 | -0.0254 | 0.0184 | 0.2167 | 11.1154 | 0.1337 | 48.6268 |
| CardioEmbolicStroke | genus. Oscillospira. id. 2064           | Weighted mode             | 8 | 0.1111  | 0.0606 | 0.1096 | -0.0254 | 0.0184 | 0.2167 | 11.1154 | 0.1337 | 48.6268 |
| CardioEmbolicStroke | genus. Oxalobacter. id. 2978            | MR Egger                  | 8 | 0.1441  | 0.1679 | 0.4238 | -0.0180 | 0.0231 | 0.4641 | 4.5345  | 0.6047 | 52.6829 |
| CardioEmbolicStroke | genus. Oxalobacter. id. 2978            | Weighted median           | 8 | 0.0601  | 0.0827 | 0.4669 | -0.0180 | 0.0231 | 0.4641 | 4.5345  | 0.6047 | 52.6829 |
| CardioEmbolicStroke | genus. Oxalobacter. id. 2978            | Inverse variance weighted | 8 | 0.0232  | 0.0653 | 0.7229 | -0.0180 | 0.0231 | 0.4641 | 4.5345  | 0.6047 | 52.6829 |
| CardioEmbolicStroke | genus. Oxalobacter. id. 2978            | Simple mode               | 8 | 0.0762  | 0.1315 | 0.5805 | -0.0180 | 0.0231 | 0.4641 | 4.5345  | 0.6047 | 52.6829 |
| CardioEmbolicStroke | genus. Oxalobacter. id. 2978            | Weighted mode             | 8 | 0.0713  | 0.0895 | 0.4520 | -0.0180 | 0.0231 | 0.4641 | 4.5345  | 0.6047 | 52.6829 |
| CardioEmbolicStroke | genus. Parabacteroides. id. 954         | MR Egger                  | 8 | -0.0330 | 0.0860 | 0.7142 | 0.0074  | 0.0119 | 0.5582 | 5.2956  | 0.5065 | 98.1450 |
| CardioEmbolicStroke | genus. Parabacteroides. id. 954         | Weighted median           | 8 | 0.0135  | 0.0428 | 0.7531 | 0.0074  | 0.0119 | 0.5582 | 5.2956  | 0.5065 | 98.1450 |
| CardioEmbolicStroke | genus. Parabacteroides. id. 954         | Inverse variance weighted | 8 | 0.0160  | 0.0337 | 0.6344 | 0.0074  | 0.0119 | 0.5582 | 5.2956  | 0.5065 | 98.1450 |
| CardioEmbolicStroke | genus. Parabacteroides. id. 954         | Simple mode               | 8 | 0.0469  | 0.0696 | 0.5220 | 0.0074  | 0.0119 | 0.5582 | 5.2956  | 0.5065 | 98.1450 |
| CardioEmbolicStroke | genus. Parabacteroides. id. 954         | Weighted mode             | 8 | 0.0089  | 0.0468 | 0.8550 | 0.0074  | 0.0119 | 0.5582 | 5.2956  | 0.5065 | 98.1450 |
| CardioEmbolicStroke | genus. Paraprevotella. id. 962          | MR Egger                  | 8 | -0.1072 | 0.1324 | 0.4491 | 0.0012  | 0.0183 | 0.9514 | 4.0508  | 0.6698 | 48.7238 |
| CardioEmbolicStroke | genus. Paraprevotella. id. 962          | Weighted median           | 8 | -0.0912 | 0.0651 | 0.1616 | 0.0012  | 0.0183 | 0.9514 | 4.0508  | 0.6698 | 48.7238 |
| CardioEmbolicStroke | genus. Paraprevotella. id. 962          | Inverse variance weighted | 8 | -0.0994 | 0.0520 | 0.0557 | 0.0012  | 0.0183 | 0.9514 | 4.0508  | 0.6698 | 48.7238 |

|                     |                                            |                           |   |         |        |        |         |        |        |         |        |          |
|---------------------|--------------------------------------------|---------------------------|---|---------|--------|--------|---------|--------|--------|---------|--------|----------|
| CardioEmbolicStroke | genus.Paraprevotella.id.962                | Simple mode               | 8 | -0.0503 | 0.1008 | 0.6331 | 0.0012  | 0.0183 | 0.9514 | 4.0508  | 0.6698 | 48.7238  |
| CardioEmbolicStroke | genus.Paraprevotella.id.962                | Weighted mode             | 8 | -0.0917 | 0.0716 | 0.2411 | 0.0012  | 0.0183 | 0.9514 | 4.0508  | 0.6698 | 48.7238  |
| CardioEmbolicStroke | genus.Parasutterella.id.2892               | MR Egger                  | 8 | 0.0338  | 0.1062 | 0.7613 | -0.0027 | 0.0147 | 0.8610 | 3.9166  | 0.6880 | 95.3740  |
| CardioEmbolicStroke | genus.Parasutterella.id.2892               | Weighted median           | 8 | 0.0004  | 0.0545 | 0.9935 | -0.0027 | 0.0147 | 0.8610 | 3.9166  | 0.6880 | 95.3740  |
| CardioEmbolicStroke | genus.Parasutterella.id.2892               | Inverse variance weighted | 8 | 0.0159  | 0.0415 | 0.7019 | -0.0027 | 0.0147 | 0.8610 | 3.9166  | 0.6880 | 95.3740  |
| CardioEmbolicStroke | genus.Parasutterella.id.2892               | Simple mode               | 8 | -0.0381 | 0.0775 | 0.6385 | -0.0027 | 0.0147 | 0.8610 | 3.9166  | 0.6880 | 95.3740  |
| CardioEmbolicStroke | genus.Parasutterella.id.2892               | Weighted mode             | 8 | 0.0040  | 0.0587 | 0.9473 | -0.0027 | 0.0147 | 0.8610 | 3.9166  | 0.6880 | 95.3740  |
| CardioEmbolicStroke | genus.Peptococcus.id.2037                  | MR Egger                  | 8 | 0.1106  | 0.1695 | 0.5382 | -0.0060 | 0.0232 | 0.8060 | 7.3869  | 0.2865 | 38.4552  |
| CardioEmbolicStroke | genus.Peptococcus.id.2037                  | Weighted median           | 8 | 0.1327  | 0.0780 | 0.0890 | -0.0060 | 0.0232 | 0.8060 | 7.3869  | 0.2865 | 38.4552  |
| CardioEmbolicStroke | genus.Peptococcus.id.2037                  | Inverse variance weighted | 8 | 0.0705  | 0.0613 | 0.2501 | -0.0060 | 0.0232 | 0.8060 | 7.3869  | 0.2865 | 38.4552  |
| CardioEmbolicStroke | genus.Peptococcus.id.2037                  | Simple mode               | 8 | 0.0908  | 0.1405 | 0.5385 | -0.0060 | 0.0232 | 0.8060 | 7.3869  | 0.2865 | 38.4552  |
| CardioEmbolicStroke | genus.Peptococcus.id.2037                  | Weighted mode             | 8 | 0.1350  | 0.0824 | 0.1454 | -0.0060 | 0.0232 | 0.8060 | 7.3869  | 0.2865 | 38.4552  |
| CardioEmbolicStroke | genus.Phascolarctobacterium.id.2168        | MR Egger                  | 8 | -0.0256 | 0.1362 | 0.8571 | -0.0102 | 0.0188 | 0.6072 | 9.6599  | 0.1397 | 38.4925  |
| CardioEmbolicStroke | genus.Phascolarctobacterium.id.2168        | Weighted median           | 8 | -0.0628 | 0.0562 | 0.2634 | -0.0102 | 0.0188 | 0.6072 | 9.6599  | 0.1397 | 38.4925  |
| CardioEmbolicStroke | genus.Phascolarctobacterium.id.2168        | Inverse variance weighted | 8 | -0.0935 | 0.0506 | 0.0643 | -0.0102 | 0.0188 | 0.6072 | 9.6599  | 0.1397 | 38.4925  |
| CardioEmbolicStroke | genus.Phascolarctobacterium.id.2168        | Simple mode               | 8 | -0.0691 | 0.0965 | 0.4972 | -0.0102 | 0.0188 | 0.6072 | 9.6599  | 0.1397 | 38.4925  |
| CardioEmbolicStroke | genus.Phascolarctobacterium.id.2168        | Weighted mode             | 8 | -0.0577 | 0.0598 | 0.3672 | -0.0102 | 0.0188 | 0.6072 | 9.6599  | 0.1397 | 38.4925  |
| CardioEmbolicStroke | genus.Prevotella7.id.11182                 | MR Egger                  | 8 | 0.0124  | 0.1932 | 0.9507 | -0.0085 | 0.0266 | 0.7599 | 2.2168  | 0.8987 | 67.8107  |
| CardioEmbolicStroke | genus.Prevotella7.id.11182                 | Weighted median           | 8 | -0.0390 | 0.0970 | 0.6872 | -0.0085 | 0.0266 | 0.7599 | 2.2168  | 0.8987 | 67.8107  |
| CardioEmbolicStroke | genus.Prevotella7.id.11182                 | Inverse variance weighted | 8 | -0.0445 | 0.0754 | 0.5556 | -0.0085 | 0.0266 | 0.7599 | 2.2168  | 0.8987 | 67.8107  |
| CardioEmbolicStroke | genus.Prevotella7.id.11182                 | Simple mode               | 8 | -0.1030 | 0.1413 | 0.4895 | -0.0085 | 0.0266 | 0.7599 | 2.2168  | 0.8987 | 67.8107  |
| CardioEmbolicStroke | genus.Prevotella7.id.11182                 | Weighted mode             | 8 | -0.0337 | 0.1035 | 0.7540 | -0.0085 | 0.0266 | 0.7599 | 2.2168  | 0.8987 | 67.8107  |
| CardioEmbolicStroke | genus.Prevotella9.id.11183                 | MR Egger                  | 8 | 0.1344  | 0.1103 | 0.2686 | -0.0125 | 0.0153 | 0.4452 | 2.9309  | 0.8175 | 85.3323  |
| CardioEmbolicStroke | genus.Prevotella9.id.11183                 | Weighted median           | 8 | 0.0689  | 0.0534 | 0.1969 | -0.0125 | 0.0153 | 0.4452 | 2.9309  | 0.8175 | 85.3323  |
| CardioEmbolicStroke | genus.Prevotella9.id.11183                 | Inverse variance weighted | 8 | 0.0516  | 0.0434 | 0.2342 | -0.0125 | 0.0153 | 0.4452 | 2.9309  | 0.8175 | 85.3323  |
| CardioEmbolicStroke | genus.Prevotella9.id.11183                 | Simple mode               | 8 | 0.0797  | 0.0794 | 0.3492 | -0.0125 | 0.0153 | 0.4452 | 2.9309  | 0.8175 | 85.3323  |
| CardioEmbolicStroke | genus.Prevotella9.id.11183                 | Weighted mode             | 8 | 0.0735  | 0.0565 | 0.2346 | -0.0125 | 0.0153 | 0.4452 | 2.9309  | 0.8175 | 85.3323  |
| CardioEmbolicStroke | genus.RikenellaceaeRC9gutgroup.id.11191    | MR Egger                  | 8 | -0.1960 | 0.3010 | 0.5391 | 0.0058  | 0.0414 | 0.8930 | 13.9877 | 0.0298 | 14.3880  |
| CardioEmbolicStroke | genus.RikenellaceaeRC9gutgroup.id.11191    | Weighted median           | 8 | -0.2050 | 0.0999 | 0.0402 | 0.0058  | 0.0414 | 0.8930 | 13.9877 | 0.0298 | 14.3880  |
| CardioEmbolicStroke | genus.RikenellaceaeRC9gutgroup.id.11191    | Inverse variance weighted | 8 | -0.1571 | 0.1088 | 0.1487 | 0.0058  | 0.0414 | 0.8930 | 13.9877 | 0.0298 | 14.3880  |
| CardioEmbolicStroke | genus.RikenellaceaeRC9gutgroup.id.11191    | Simple mode               | 8 | -0.2458 | 0.1778 | 0.2093 | 0.0058  | 0.0414 | 0.8930 | 13.9877 | 0.0298 | 14.3880  |
| CardioEmbolicStroke | genus.RikenellaceaeRC9gutgroup.id.11191    | Weighted mode             | 8 | -0.2146 | 0.1049 | 0.0801 | 0.0058  | 0.0414 | 0.8930 | 13.9877 | 0.0298 | 14.3880  |
| CardioEmbolicStroke | genus.Romboutsia.id.11347                  | MR Egger                  | 8 | 0.0342  | 0.0992 | 0.7418 | 0.0002  | 0.0137 | 0.9877 | 6.4992  | 0.3697 | 77.2582  |
| CardioEmbolicStroke | genus.Romboutsia.id.11347                  | Weighted median           | 8 | 0.0429  | 0.0463 | 0.3535 | 0.0002  | 0.0137 | 0.9877 | 6.4992  | 0.3697 | 77.2582  |
| CardioEmbolicStroke | genus.Romboutsia.id.11347                  | Inverse variance weighted | 8 | 0.0357  | 0.0373 | 0.3381 | 0.0002  | 0.0137 | 0.9877 | 6.4992  | 0.3697 | 77.2582  |
| CardioEmbolicStroke | genus.Romboutsia.id.11347                  | Simple mode               | 8 | 0.0893  | 0.0823 | 0.3136 | 0.0002  | 0.0137 | 0.9877 | 6.4992  | 0.3697 | 77.2582  |
| CardioEmbolicStroke | genus.Romboutsia.id.11347                  | Weighted mode             | 8 | 0.0468  | 0.0569 | 0.4379 | 0.0002  | 0.0137 | 0.9877 | 6.4992  | 0.3697 | 77.2582  |
| CardioEmbolicStroke | genus.Roseburia.id.2012                    | MR Egger                  | 8 | 0.0223  | 0.0900 | 0.8127 | -0.0079 | 0.0124 | 0.5485 | 6.7547  | 0.3441 | 86.6008  |
| CardioEmbolicStroke | genus.Roseburia.id.2012                    | Weighted median           | 8 | -0.0089 | 0.0424 | 0.8336 | -0.0079 | 0.0124 | 0.5485 | 6.7547  | 0.3441 | 86.6008  |
| CardioEmbolicStroke | genus.Roseburia.id.2012                    | Inverse variance weighted | 8 | -0.0303 | 0.0337 | 0.3676 | -0.0079 | 0.0124 | 0.5485 | 6.7547  | 0.3441 | 86.6008  |
| CardioEmbolicStroke | genus.Roseburia.id.2012                    | Simple mode               | 8 | 0.0261  | 0.0681 | 0.7126 | -0.0079 | 0.0124 | 0.5485 | 6.7547  | 0.3441 | 86.6008  |
| CardioEmbolicStroke | genus.Roseburia.id.2012                    | Weighted mode             | 8 | 0.0015  | 0.0459 | 0.9744 | -0.0079 | 0.0124 | 0.5485 | 6.7547  | 0.3441 | 86.6008  |
| CardioEmbolicStroke | genus.Ruminiclostridium5.id.11355          | MR Egger                  | 8 | 0.0391  | 0.1043 | 0.7207 | -0.0084 | 0.0144 | 0.5788 | 8.7781  | 0.1864 | 78.6924  |
| CardioEmbolicStroke | genus.Ruminiclostridium5.id.11355          | Weighted median           | 8 | -0.0141 | 0.0443 | 0.7496 | -0.0084 | 0.0144 | 0.5788 | 8.7781  | 0.1864 | 78.6924  |
| CardioEmbolicStroke | genus.Ruminiclostridium5.id.11355          | Inverse variance weighted | 8 | -0.0172 | 0.0388 | 0.6568 | -0.0084 | 0.0144 | 0.5788 | 8.7781  | 0.1864 | 78.6924  |
| CardioEmbolicStroke | genus.Ruminiclostridium5.id.11355          | Simple mode               | 8 | -0.1249 | 0.0870 | 0.1944 | -0.0084 | 0.0144 | 0.5788 | 8.7781  | 0.1864 | 78.6924  |
| CardioEmbolicStroke | genus.Ruminiclostridium5.id.11355          | Weighted mode             | 8 | 0.0188  | 0.0485 | 0.7099 | -0.0084 | 0.0144 | 0.5788 | 8.7781  | 0.1864 | 78.6924  |
| CardioEmbolicStroke | genus.Ruminiclostridium6.id.11356          | MR Egger                  | 8 | -0.0547 | 0.0983 | 0.5980 | 0.0028  | 0.0136 | 0.8433 | 2.3805  | 0.8816 | 129.5517 |
| CardioEmbolicStroke | genus.Ruminiclostridium6.id.11356          | Weighted median           | 8 | -0.0501 | 0.0487 | 0.3038 | 0.0028  | 0.0136 | 0.8433 | 2.3805  | 0.8816 | 129.5517 |
| CardioEmbolicStroke | genus.Ruminiclostridium6.id.11356          | Inverse variance weighted | 8 | -0.0360 | 0.0384 | 0.3483 | 0.0028  | 0.0136 | 0.8433 | 2.3805  | 0.8816 | 129.5517 |
| CardioEmbolicStroke | genus.Ruminiclostridium6.id.11356          | Simple mode               | 8 | -0.0800 | 0.0762 | 0.3290 | 0.0028  | 0.0136 | 0.8433 | 2.3805  | 0.8816 | 129.5517 |
| CardioEmbolicStroke | genus.Ruminiclostridium6.id.11356          | Weighted mode             | 8 | -0.0667 | 0.0526 | 0.2451 | 0.0028  | 0.0136 | 0.8433 | 2.3805  | 0.8816 | 129.5517 |
| CardioEmbolicStroke | genus.Ruminiclostridium9.id.11357          | MR Egger                  | 8 | -0.0987 | 0.1004 | 0.3633 | 0.0099  | 0.0139 | 0.5026 | 7.8574  | 0.2487 | 79.0594  |
| CardioEmbolicStroke | genus.Ruminiclostridium9.id.11357          | Weighted median           | 8 | -0.0387 | 0.0448 | 0.3871 | 0.0099  | 0.0139 | 0.5026 | 7.8574  | 0.2487 | 79.0594  |
| CardioEmbolicStroke | genus.Ruminiclostridium9.id.11357          | Inverse variance weighted | 8 | -0.0329 | 0.0379 | 0.3855 | 0.0099  | 0.0139 | 0.5026 | 7.8574  | 0.2487 | 79.0594  |
| CardioEmbolicStroke | genus.Ruminiclostridium9.id.11357          | Simple mode               | 8 | -0.0256 | 0.0736 | 0.7376 | 0.0099  | 0.0139 | 0.5026 | 7.8574  | 0.2487 | 79.0594  |
| CardioEmbolicStroke | genus.Ruminiclostridium9.id.11357          | Weighted mode             | 8 | -0.0416 | 0.0482 | 0.4168 | 0.0099  | 0.0139 | 0.5026 | 7.8574  | 0.2487 | 79.0594  |
| CardioEmbolicStroke | genus.RuminococcaceaeNK4A214group.id.11358 | MR Egger                  | 8 | -0.0003 | 0.1126 | 0.9983 | -0.0077 | 0.0155 | 0.6371 | 9.0120  | 0.1729 | 54.2929  |

|                     |                                              |                           |   |         |        |        |         |        |        |        |        |          |
|---------------------|----------------------------------------------|---------------------------|---|---------|--------|--------|---------|--------|--------|--------|--------|----------|
| CardioEmbolicStroke | genus.RuminococcaceaeNK4A214group. id. 11358 | Weighted median           | 8 | -0.0284 | 0.0462 | 0.5386 | -0.0077 | 0.0155 | 0.6371 | 9.0120 | 0.1729 | 54.2929  |
| CardioEmbolicStroke | genus.RuminococcaceaeNK4A214group. id. 11358 | Inverse variance weighted | 8 | -0.0518 | 0.0416 | 0.2133 | -0.0077 | 0.0155 | 0.6371 | 9.0120 | 0.1729 | 54.2929  |
| CardioEmbolicStroke | genus.RuminococcaceaeNK4A214group. id. 11358 | Simple mode               | 8 | -0.1233 | 0.0896 | 0.2108 | -0.0077 | 0.0155 | 0.6371 | 9.0120 | 0.1729 | 54.2929  |
| CardioEmbolicStroke | genus.RuminococcaceaeNK4A214group. id. 11358 | Weighted mode             | 8 | -0.0004 | 0.0538 | 0.9942 | -0.0077 | 0.0155 | 0.6371 | 9.0120 | 0.1729 | 54.2929  |
| CardioEmbolicStroke | genus.RuminococcaceaeUCG002. id. 11360       | MR Egger                  | 8 | -0.0152 | 0.1083 | 0.8930 | 0.0020  | 0.0150 | 0.9004 | 9.3732 | 0.1537 | 76.7283  |
| CardioEmbolicStroke | genus.RuminococcaceaeUCG002. id. 11360       | Weighted median           | 8 | 0.0000  | 0.0453 | 0.9998 | 0.0020  | 0.0150 | 0.9004 | 9.3732 | 0.1537 | 76.7283  |
| CardioEmbolicStroke | genus.RuminococcaceaeUCG002. id. 11360       | Inverse variance weighted | 8 | -0.0022 | 0.0393 | 0.9556 | 0.0020  | 0.0150 | 0.9004 | 9.3732 | 0.1537 | 76.7283  |
| CardioEmbolicStroke | genus.RuminococcaceaeUCG002. id. 11360       | Simple mode               | 8 | -0.0234 | 0.0822 | 0.7836 | 0.0020  | 0.0150 | 0.9004 | 9.3732 | 0.1537 | 76.7283  |
| CardioEmbolicStroke | genus.RuminococcaceaeUCG002. id. 11360       | Weighted mode             | 8 | 0.0068  | 0.0464 | 0.8876 | 0.0020  | 0.0150 | 0.9004 | 9.3732 | 0.1537 | 76.7283  |
| CardioEmbolicStroke | genus.RuminococcaceaeUCG003. id. 11361       | MR Egger                  | 8 | 0.0721  | 0.0942 | 0.4727 | -0.0200 | 0.0130 | 0.1760 | 4.2117 | 0.7551 | 100.7334 |
| CardioEmbolicStroke | genus.RuminococcaceaeUCG003. id. 11361       | Weighted median           | 8 | -0.0342 | 0.0463 | 0.4600 | -0.0200 | 0.0130 | 0.1760 | 4.2117 | 0.7551 | 100.7334 |
| CardioEmbolicStroke | genus.RuminococcaceaeUCG003. id. 11361       | Inverse variance weighted | 8 | -0.0608 | 0.0369 | 0.0995 | -0.0200 | 0.0130 | 0.1760 | 4.2117 | 0.7551 | 100.7334 |
| CardioEmbolicStroke | genus.RuminococcaceaeUCG003. id. 11361       | Simple mode               | 8 | -0.0373 | 0.0692 | 0.6073 | -0.0200 | 0.0130 | 0.1760 | 4.2117 | 0.7551 | 100.7334 |
| CardioEmbolicStroke | genus.RuminococcaceaeUCG003. id. 11361       | Weighted mode             | 8 | -0.0239 | 0.0509 | 0.6535 | -0.0200 | 0.0130 | 0.1760 | 4.2117 | 0.7551 | 100.7334 |
| CardioEmbolicStroke | genus.RuminococcaceaeUCG004. id. 11362       | MR Egger                  | 8 | -0.1813 | 0.1167 | 0.1713 | 0.0266  | 0.0161 | 0.1490 | 6.2009 | 0.5165 | 79.8638  |
| CardioEmbolicStroke | genus.RuminococcaceaeUCG004. id. 11362       | Weighted median           | 8 | -0.0813 | 0.0585 | 0.1645 | 0.0266  | 0.0161 | 0.1490 | 6.2009 | 0.5165 | 79.8638  |
| CardioEmbolicStroke | genus.RuminococcaceaeUCG004. id. 11362       | Inverse variance weighted | 8 | -0.0034 | 0.0455 | 0.9397 | 0.0266  | 0.0161 | 0.1490 | 6.2009 | 0.5165 | 79.8638  |
| CardioEmbolicStroke | genus.RuminococcaceaeUCG004. id. 11362       | Simple mode               | 8 | 0.0181  | 0.1132 | 0.8778 | 0.0266  | 0.0161 | 0.1490 | 6.2009 | 0.5165 | 79.8638  |
| CardioEmbolicStroke | genus.RuminococcaceaeUCG004. id. 11362       | Weighted mode             | 8 | -0.0677 | 0.0616 | 0.3082 | 0.0266  | 0.0161 | 0.1490 | 6.2009 | 0.5165 | 79.8638  |
| CardioEmbolicStroke | genus.RuminococcaceaeUCG005. id. 11363       | MR Egger                  | 8 | -0.0101 | 0.1074 | 0.9282 | 0.0041  | 0.0148 | 0.7896 | 8.6338 | 0.1952 | 77.0151  |
| CardioEmbolicStroke | genus.RuminococcaceaeUCG005. id. 11363       | Weighted median           | 8 | 0.0406  | 0.0453 | 0.3698 | 0.0041  | 0.0148 | 0.7896 | 8.6338 | 0.1952 | 77.0151  |
| CardioEmbolicStroke | genus.RuminococcaceaeUCG005. id. 11363       | Inverse variance weighted | 8 | 0.0175  | 0.0391 | 0.6550 | 0.0041  | 0.0148 | 0.7896 | 8.6338 | 0.1952 | 77.0151  |
| CardioEmbolicStroke | genus.RuminococcaceaeUCG005. id. 11363       | Simple mode               | 8 | 0.0596  | 0.0775 | 0.4673 | 0.0041  | 0.0148 | 0.7896 | 8.6338 | 0.1952 | 77.0151  |
| CardioEmbolicStroke | genus.RuminococcaceaeUCG005. id. 11363       | Weighted mode             | 8 | 0.0474  | 0.0499 | 0.3745 | 0.0041  | 0.0148 | 0.7896 | 8.6338 | 0.1952 | 77.0151  |
| CardioEmbolicStroke | genus.RuminococcaceaeUCG009. id. 11366       | MR Egger                  | 8 | -0.2492 | 0.1314 | 0.1066 | 0.0368  | 0.0181 | 0.0883 | 6.8083 | 0.4491 | 60.4274  |
| CardioEmbolicStroke | genus.RuminococcaceaeUCG009. id. 11366       | Weighted median           | 8 | -0.0774 | 0.0671 | 0.2487 | 0.0368  | 0.0181 | 0.0883 | 6.8083 | 0.4491 | 60.4274  |
| CardioEmbolicStroke | genus.RuminococcaceaeUCG009. id. 11366       | Inverse variance weighted | 8 | -0.0033 | 0.0512 | 0.9489 | 0.0368  | 0.0181 | 0.0883 | 6.8083 | 0.4491 | 60.4274  |
| CardioEmbolicStroke | genus.RuminococcaceaeUCG009. id. 11366       | Simple mode               | 8 | 0.1878  | 0.1272 | 0.1834 | 0.0368  | 0.0181 | 0.0883 | 6.8083 | 0.4491 | 60.4274  |
| CardioEmbolicStroke | genus.RuminococcaceaeUCG009. id. 11366       | Weighted mode             | 8 | -0.0770 | 0.0682 | 0.2956 | 0.0368  | 0.0181 | 0.0883 | 6.8083 | 0.4491 | 60.4274  |
| CardioEmbolicStroke | genus.RuminococcaceaeUCG010. id. 11367       | MR Egger                  | 8 | -0.0539 | 0.1003 | 0.6104 | 0.0054  | 0.0138 | 0.7087 | 4.5622 | 0.6011 | 99.6325  |
| CardioEmbolicStroke | genus.RuminococcaceaeUCG010. id. 11367       | Weighted median           | 8 | -0.0297 | 0.0502 | 0.5547 | 0.0054  | 0.0138 | 0.7087 | 4.5622 | 0.6011 | 99.6325  |
| CardioEmbolicStroke | genus.RuminococcaceaeUCG010. id. 11367       | Inverse variance weighted | 8 | -0.0177 | 0.0392 | 0.6513 | 0.0054  | 0.0138 | 0.7087 | 4.5622 | 0.6011 | 99.6325  |
| CardioEmbolicStroke | genus.RuminococcaceaeUCG010. id. 11367       | Simple mode               | 8 | -0.0529 | 0.0762 | 0.5101 | 0.0054  | 0.0138 | 0.7087 | 4.5622 | 0.6011 | 99.6325  |
| CardioEmbolicStroke | genus.RuminococcaceaeUCG010. id. 11367       | Weighted mode             | 8 | -0.0278 | 0.0519 | 0.6084 | 0.0054  | 0.0138 | 0.7087 | 4.5622 | 0.6011 | 99.6325  |
| CardioEmbolicStroke | genus.RuminococcaceaeUCG011. id. 11368       | MR Egger                  | 8 | -0.2531 | 0.1906 | 0.2325 | 0.0371  | 0.0261 | 0.2050 | 6.1072 | 0.5273 | 35.8729  |
| CardioEmbolicStroke | genus.RuminococcaceaeUCG011. id. 11368       | Weighted median           | 8 | -0.0555 | 0.0950 | 0.5592 | 0.0371  | 0.0261 | 0.2050 | 6.1072 | 0.5273 | 35.8729  |
| CardioEmbolicStroke | genus.RuminococcaceaeUCG011. id. 11368       | Inverse variance weighted | 8 | -0.0035 | 0.0741 | 0.9627 | 0.0371  | 0.0261 | 0.2050 | 6.1072 | 0.5273 | 35.8729  |
| CardioEmbolicStroke | genus.RuminococcaceaeUCG011. id. 11368       | Simple mode               | 8 | -0.0711 | 0.1597 | 0.6696 | 0.0371  | 0.0261 | 0.2050 | 6.1072 | 0.5273 | 35.8729  |
| CardioEmbolicStroke | genus.RuminococcaceaeUCG011. id. 11368       | Weighted mode             | 8 | -0.0711 | 0.1047 | 0.5189 | 0.0371  | 0.0261 | 0.2050 | 6.1072 | 0.5273 | 35.8729  |
| CardioEmbolicStroke | genus.RuminococcaceaeUCG013. id. 11370       | MR Egger                  | 8 | -0.0506 | 0.0878 | 0.5855 | -0.0030 | 0.0121 | 0.8131 | 3.5960 | 0.7312 | 92.8609  |
| CardioEmbolicStroke | genus.RuminococcaceaeUCG013. id. 11370       | Weighted median           | 8 | -0.0708 | 0.0419 | 0.0909 | -0.0030 | 0.0121 | 0.8131 | 3.5960 | 0.7312 | 92.8609  |
| CardioEmbolicStroke | genus.RuminococcaceaeUCG013. id. 11370       | Inverse variance weighted | 8 | -0.0706 | 0.0343 | 0.0396 | -0.0030 | 0.0121 | 0.8131 | 3.5960 | 0.7312 | 92.8609  |
| CardioEmbolicStroke | genus.RuminococcaceaeUCG013. id. 11370       | Simple mode               | 8 | -0.0592 | 0.0660 | 0.3997 | -0.0030 | 0.0121 | 0.8131 | 3.5960 | 0.7312 | 92.8609  |
| CardioEmbolicStroke | genus.RuminococcaceaeUCG013. id. 11370       | Weighted mode             | 8 | -0.0691 | 0.0490 | 0.2011 | -0.0030 | 0.0121 | 0.8131 | 3.5960 | 0.7312 | 92.8609  |
| CardioEmbolicStroke | genus.RuminococcaceaeUCG014. id. 11371       | MR Egger                  | 8 | 0.1138  | 0.1192 | 0.3763 | -0.0137 | 0.0164 | 0.4374 | 9.4736 | 0.1486 | 66.6189  |
| CardioEmbolicStroke | genus.RuminococcaceaeUCG014. id. 11371       | Weighted median           | 8 | 0.0405  | 0.0467 | 0.3852 | -0.0137 | 0.0164 | 0.4374 | 9.4736 | 0.1486 | 66.6189  |
| CardioEmbolicStroke | genus.RuminococcaceaeUCG014. id. 11371       | Inverse variance weighted | 8 | 0.0226  | 0.0455 | 0.6197 | -0.0137 | 0.0164 | 0.4374 | 9.4736 | 0.1486 | 66.6189  |
| CardioEmbolicStroke | genus.RuminococcaceaeUCG014. id. 11371       | Simple mode               | 8 | 0.0696  | 0.0844 | 0.4367 | -0.0137 | 0.0164 | 0.4374 | 9.4736 | 0.1486 | 66.6189  |
| CardioEmbolicStroke | genus.RuminococcaceaeUCG014. id. 11371       | Weighted mode             | 8 | 0.0506  | 0.0534 | 0.3748 | -0.0137 | 0.0164 | 0.4374 | 9.4736 | 0.1486 | 66.6189  |
| CardioEmbolicStroke | genus.Ruminococcus1. id. 11373               | MR Egger                  | 8 | -0.0508 | 0.1029 | 0.6392 | 0.0029  | 0.0142 | 0.8458 | 8.2058 | 0.2234 | 70.6341  |
| CardioEmbolicStroke | genus.Ruminococcus1. id. 11373               | Weighted median           | 8 | -0.0294 | 0.0427 | 0.4915 | 0.0029  | 0.0142 | 0.8458 | 8.2058 | 0.2234 | 70.6341  |
| CardioEmbolicStroke | genus.Ruminococcus1. id. 11373               | Inverse variance weighted | 8 | -0.0316 | 0.0374 | 0.3989 | 0.0029  | 0.0142 | 0.8458 | 8.2058 | 0.2234 | 70.6341  |
| CardioEmbolicStroke | genus.Ruminococcus1. id. 11373               | Simple mode               | 8 | 0.0222  | 0.0717 | 0.7660 | 0.0029  | 0.0142 | 0.8458 | 8.2058 | 0.2234 | 70.6341  |
| CardioEmbolicStroke | genus.Ruminococcus1. id. 11373               | Weighted mode             | 8 | -0.0235 | 0.0488 | 0.6450 | 0.0029  | 0.0142 | 0.8458 | 8.2058 | 0.2234 | 70.6341  |
| CardioEmbolicStroke | genus.Ruminococcus2. id. 11374               | MR Egger                  | 8 | -0.1306 | 0.0917 | 0.2041 | 0.0137  | 0.0126 | 0.3202 | 6.8619 | 0.4434 | 73.3692  |
| CardioEmbolicStroke | genus.Ruminococcus2. id. 11374               | Weighted median           | 8 | -0.0429 | 0.0454 | 0.3455 | 0.0137  | 0.0126 | 0.3202 | 6.8619 | 0.4434 | 73.3692  |
| CardioEmbolicStroke | genus.Ruminococcus2. id. 11374               | Inverse variance weighted | 8 | -0.0392 | 0.0358 | 0.2745 | 0.0137  | 0.0126 | 0.3202 | 6.8619 | 0.4434 | 73.3692  |
| CardioEmbolicStroke | genus.Ruminococcus2. id. 11374               | Simple mode               | 8 | 0.0130  | 0.0755 | 0.8685 | 0.0137  | 0.0126 | 0.3202 | 6.8619 | 0.4434 | 73.3692  |

|                     |                                     |                           |   |         |        |        |         |        |        |         |        |          |
|---------------------|-------------------------------------|---------------------------|---|---------|--------|--------|---------|--------|--------|---------|--------|----------|
| CardioEmbolicStroke | genus. Ruminococcus2. id. 11374     | Weighted mode             | 8 | -0.0535 | 0.0506 | 0.3258 | 0.0137  | 0.0126 | 0.3202 | 6.8619  | 0.4434 | 73.3692  |
| CardioEmbolicStroke | genus. Sellimonas. id. 14369        | MR Egger                  | 8 | 0.2852  | 0.2043 | 0.2121 | -0.0485 | 0.0281 | 0.1345 | 5.3017  | 0.6232 | 37.2760  |
| CardioEmbolicStroke | genus. Sellimonas. id. 14369        | Weighted median           | 8 | 0.0792  | 0.1006 | 0.4310 | -0.0485 | 0.0281 | 0.1345 | 5.3017  | 0.6232 | 37.2760  |
| CardioEmbolicStroke | genus. Sellimonas. id. 14369        | Inverse variance weighted | 8 | -0.0401 | 0.0796 | 0.6144 | -0.0485 | 0.0281 | 0.1345 | 5.3017  | 0.6232 | 37.2760  |
| CardioEmbolicStroke | genus. Sellimonas. id. 14369        | Simple mode               | 8 | -0.0518 | 0.1734 | 0.7738 | -0.0485 | 0.0281 | 0.1345 | 5.3017  | 0.6232 | 37.2760  |
| CardioEmbolicStroke | genus. Sellimonas. id. 14369        | Weighted mode             | 8 | 0.0591  | 0.1017 | 0.5791 | -0.0485 | 0.0281 | 0.1345 | 5.3017  | 0.6232 | 37.2760  |
| CardioEmbolicStroke | genus. Senegalimassilia. id. 11160  | MR Egger                  | 8 | -0.0218 | 0.1381 | 0.8795 | 0.0034  | 0.0189 | 0.8624 | 2.4693  | 0.8719 | 111.6151 |
| CardioEmbolicStroke | genus. Senegalimassilia. id. 11160  | Weighted median           | 8 | -0.0074 | 0.0653 | 0.9098 | 0.0034  | 0.0189 | 0.8624 | 2.4693  | 0.8719 | 111.6151 |
| CardioEmbolicStroke | genus. Senegalimassilia. id. 11160  | Inverse variance weighted | 8 | 0.0012  | 0.0537 | 0.9825 | 0.0034  | 0.0189 | 0.8624 | 2.4693  | 0.8719 | 111.6151 |
| CardioEmbolicStroke | genus. Senegalimassilia. id. 11160  | Simple mode               | 8 | 0.0333  | 0.0954 | 0.7376 | 0.0034  | 0.0189 | 0.8624 | 2.4693  | 0.8719 | 111.6151 |
| CardioEmbolicStroke | genus. Senegalimassilia. id. 11160  | Weighted mode             | 8 | -0.0071 | 0.0768 | 0.9290 | 0.0034  | 0.0189 | 0.8624 | 2.4693  | 0.8719 | 111.6151 |
| CardioEmbolicStroke | genus. Slackia. id. 825             | MR Egger                  | 8 | 0.1372  | 0.1592 | 0.4220 | -0.0115 | 0.0218 | 0.6175 | 6.9277  | 0.3276 | 41.6633  |
| CardioEmbolicStroke | genus. Slackia. id. 825             | Weighted median           | 8 | 0.0869  | 0.0739 | 0.2391 | -0.0115 | 0.0218 | 0.6175 | 6.9277  | 0.3276 | 41.6633  |
| CardioEmbolicStroke | genus. Slackia. id. 825             | Inverse variance weighted | 8 | 0.0599  | 0.0585 | 0.3057 | -0.0115 | 0.0218 | 0.6175 | 6.9277  | 0.3276 | 41.6633  |
| CardioEmbolicStroke | genus. Slackia. id. 825             | Simple mode               | 8 | 0.1304  | 0.1284 | 0.3438 | -0.0115 | 0.0218 | 0.6175 | 6.9277  | 0.3276 | 41.6633  |
| CardioEmbolicStroke | genus. Slackia. id. 825             | Weighted mode             | 8 | 0.1025  | 0.0859 | 0.2716 | -0.0115 | 0.0218 | 0.6175 | 6.9277  | 0.3276 | 41.6633  |
| CardioEmbolicStroke | genus. Streptococcus. id. 1853      | MR Egger                  | 8 | 0.0890  | 0.1025 | 0.4184 | -0.0076 | 0.0141 | 0.6113 | 7.9924  | 0.2387 | 71.2375  |
| CardioEmbolicStroke | genus. Streptococcus. id. 1853      | Weighted median           | 8 | 0.0572  | 0.0435 | 0.1885 | -0.0076 | 0.0141 | 0.6113 | 7.9924  | 0.2387 | 71.2375  |
| CardioEmbolicStroke | genus. Streptococcus. id. 1853      | Inverse variance weighted | 8 | 0.0385  | 0.0380 | 0.3107 | -0.0076 | 0.0141 | 0.6113 | 7.9924  | 0.2387 | 71.2375  |
| CardioEmbolicStroke | genus. Streptococcus. id. 1853      | Simple mode               | 8 | 0.0903  | 0.0699 | 0.2375 | -0.0076 | 0.0141 | 0.6113 | 7.9924  | 0.2387 | 71.2375  |
| CardioEmbolicStroke | genus. Streptococcus. id. 1853      | Weighted mode             | 8 | 0.0604  | 0.0467 | 0.2372 | -0.0076 | 0.0141 | 0.6113 | 7.9924  | 0.2387 | 71.2375  |
| CardioEmbolicStroke | genus. Sutterella. id. 2896         | MR Egger                  | 8 | -0.1262 | 0.0999 | 0.2533 | 0.0145  | 0.0138 | 0.3341 | 7.3691  | 0.3915 | 76.7969  |
| CardioEmbolicStroke | genus. Sutterella. id. 2896         | Weighted median           | 8 | -0.0607 | 0.0484 | 0.2102 | 0.0145  | 0.0138 | 0.3341 | 7.3691  | 0.3915 | 76.7969  |
| CardioEmbolicStroke | genus. Sutterella. id. 2896         | Inverse variance weighted | 8 | -0.0297 | 0.0394 | 0.4515 | 0.0145  | 0.0138 | 0.3341 | 7.3691  | 0.3915 | 76.7969  |
| CardioEmbolicStroke | genus. Sutterella. id. 2896         | Simple mode               | 8 | 0.0855  | 0.0867 | 0.3571 | 0.0145  | 0.0138 | 0.3341 | 7.3691  | 0.3915 | 76.7969  |
| CardioEmbolicStroke | genus. Sutterella. id. 2896         | Weighted mode             | 8 | -0.0646 | 0.0548 | 0.2768 | 0.0145  | 0.0138 | 0.3341 | 7.3691  | 0.3915 | 76.7969  |
| CardioEmbolicStroke | genus. Terrisporobacter. id. 11348  | MR Egger                  | 8 | 0.0418  | 0.1401 | 0.7754 | -0.0034 | 0.0193 | 0.8664 | 5.6460  | 0.4640 | 58.2085  |
| CardioEmbolicStroke | genus. Terrisporobacter. id. 11348  | Weighted median           | 8 | 0.0212  | 0.0722 | 0.7688 | -0.0034 | 0.0193 | 0.8664 | 5.6460  | 0.4640 | 58.2085  |
| CardioEmbolicStroke | genus. Terrisporobacter. id. 11348  | Inverse variance weighted | 8 | 0.0192  | 0.0546 | 0.7257 | -0.0034 | 0.0193 | 0.8664 | 5.6460  | 0.4640 | 58.2085  |
| CardioEmbolicStroke | genus. Terrisporobacter. id. 11348  | Simple mode               | 8 | 0.0782  | 0.1070 | 0.4888 | -0.0034 | 0.0193 | 0.8664 | 5.6460  | 0.4640 | 58.2085  |
| CardioEmbolicStroke | genus. Terrisporobacter. id. 11348  | Weighted mode             | 8 | 0.0261  | 0.0809 | 0.7565 | -0.0034 | 0.0193 | 0.8664 | 5.6460  | 0.4640 | 58.2085  |
| CardioEmbolicStroke | genus. Turicibacter. id. 2162       | MR Egger                  | 8 | 0.0918  | 0.1207 | 0.4758 | -0.0068 | 0.0166 | 0.6946 | 3.2832  | 0.7726 | 78.6760  |
| CardioEmbolicStroke | genus. Turicibacter. id. 2162       | Weighted median           | 8 | 0.0341  | 0.0590 | 0.5635 | -0.0068 | 0.0166 | 0.6946 | 3.2832  | 0.7726 | 78.6760  |
| CardioEmbolicStroke | genus. Turicibacter. id. 2162       | Inverse variance weighted | 8 | 0.0460  | 0.0471 | 0.3285 | -0.0068 | 0.0166 | 0.6946 | 3.2832  | 0.7726 | 78.6760  |
| CardioEmbolicStroke | genus. Turicibacter. id. 2162       | Simple mode               | 8 | -0.0095 | 0.0894 | 0.9180 | -0.0068 | 0.0166 | 0.6946 | 3.2832  | 0.7726 | 78.6760  |
| CardioEmbolicStroke | genus. Turicibacter. id. 2162       | Weighted mode             | 8 | 0.0390  | 0.0637 | 0.5594 | -0.0068 | 0.0166 | 0.6946 | 3.2832  | 0.7726 | 78.6760  |
| CardioEmbolicStroke | genus. Tyzzerella3. id. 11335       | MR Egger                  | 8 | 0.1383  | 0.1888 | 0.4914 | -0.0020 | 0.0260 | 0.9420 | 8.9537  | 0.1762 | 28.1213  |
| CardioEmbolicStroke | genus. Tyzzerella3. id. 11335       | Weighted median           | 8 | 0.1632  | 0.0766 | 0.0332 | -0.0020 | 0.0260 | 0.9420 | 8.9537  | 0.1762 | 28.1213  |
| CardioEmbolicStroke | genus. Tyzzerella3. id. 11335       | Inverse variance weighted | 8 | 0.1252  | 0.0682 | 0.0663 | -0.0020 | 0.0260 | 0.9420 | 8.9537  | 0.1762 | 28.1213  |
| CardioEmbolicStroke | genus. Tyzzerella3. id. 11335       | Simple mode               | 8 | 0.2209  | 0.1271 | 0.1257 | -0.0020 | 0.0260 | 0.9420 | 8.9537  | 0.1762 | 28.1213  |
| CardioEmbolicStroke | genus. Tyzzerella3. id. 11335       | Weighted mode             | 8 | 0.1818  | 0.0889 | 0.0801 | -0.0020 | 0.0260 | 0.9420 | 8.9537  | 0.1762 | 28.1213  |
| CardioEmbolicStroke | genus. Veillonella. id. 2198        | MR Egger                  | 8 | 0.0111  | 0.1275 | 0.9334 | 0.0035  | 0.0177 | 0.8474 | 7.1863  | 0.3040 | 58.8328  |
| CardioEmbolicStroke | genus. Veillonella. id. 2198        | Weighted median           | 8 | 0.0295  | 0.0591 | 0.6169 | 0.0035  | 0.0177 | 0.8474 | 7.1863  | 0.3040 | 58.8328  |
| CardioEmbolicStroke | genus. Veillonella. id. 2198        | Inverse variance weighted | 8 | 0.0347  | 0.0465 | 0.4558 | 0.0035  | 0.0177 | 0.8474 | 7.1863  | 0.3040 | 58.8328  |
| CardioEmbolicStroke | genus. Veillonella. id. 2198        | Simple mode               | 8 | 0.1734  | 0.1132 | 0.1695 | 0.0035  | 0.0177 | 0.8474 | 7.1863  | 0.3040 | 58.8328  |
| CardioEmbolicStroke | genus. Veillonella. id. 2198        | Weighted mode             | 8 | 0.0035  | 0.0657 | 0.9591 | 0.0035  | 0.0177 | 0.8474 | 7.1863  | 0.3040 | 58.8328  |
| CardioEmbolicStroke | genus. Victivallis. id. 2256        | MR Egger                  | 8 | -0.0623 | 0.1962 | 0.7615 | 0.0112  | 0.0273 | 0.6960 | 3.5278  | 0.7403 | 43.9701  |
| CardioEmbolicStroke | genus. Victivallis. id. 2256        | Weighted median           | 8 | -0.0064 | 0.0947 | 0.9462 | 0.0112  | 0.0273 | 0.6960 | 3.5278  | 0.7403 | 43.9701  |
| CardioEmbolicStroke | genus. Victivallis. id. 2256        | Inverse variance weighted | 8 | 0.0116  | 0.0772 | 0.8803 | 0.0112  | 0.0273 | 0.6960 | 3.5278  | 0.7403 | 43.9701  |
| CardioEmbolicStroke | genus. Victivallis. id. 2256        | Simple mode               | 8 | 0.0300  | 0.1590 | 0.8557 | 0.0112  | 0.0273 | 0.6960 | 3.5278  | 0.7403 | 43.9701  |
| CardioEmbolicStroke | genus. Victivallis. id. 2256        | Weighted mode             | 8 | -0.0194 | 0.1031 | 0.8564 | 0.0112  | 0.0273 | 0.6960 | 3.5278  | 0.7403 | 43.9701  |
| CardioEmbolicStroke | genus. unknowngenus. id. 1000000073 | MR Egger                  | 8 | 0.0497  | 0.1803 | 0.7921 | -0.0132 | 0.0249 | 0.6139 | 15.9814 | 0.0139 | 40.9028  |
| CardioEmbolicStroke | genus. unknowngenus. id. 1000000073 | Weighted median           | 8 | -0.0020 | 0.0579 | 0.9728 | -0.0132 | 0.0249 | 0.6139 | 15.9814 | 0.0139 | 40.9028  |
| CardioEmbolicStroke | genus. unknowngenus. id. 1000000073 | Inverse variance weighted | 8 | -0.0385 | 0.0669 | 0.5644 | -0.0132 | 0.0249 | 0.6139 | 15.9814 | 0.0139 | 40.9028  |
| CardioEmbolicStroke | genus. unknowngenus. id. 1000000073 | Simple mode               | 8 | -0.0759 | 0.1143 | 0.5283 | -0.0132 | 0.0249 | 0.6139 | 15.9814 | 0.0139 | 40.9028  |
| CardioEmbolicStroke | genus. unknowngenus. id. 1000000073 | Weighted mode             | 8 | 0.0089  | 0.0630 | 0.8920 | -0.0132 | 0.0249 | 0.6139 | 15.9814 | 0.0139 | 40.9028  |
| CardioEmbolicStroke | genus. unknowngenus. id. 1000001215 | MR Egger                  | 8 | -0.1722 | 0.1488 | 0.2909 | 0.0210  | 0.0205 | 0.3454 | 5.5436  | 0.5939 | 54.3776  |
| CardioEmbolicStroke | genus. unknowngenus. id. 1000001215 | Weighted median           | 8 | -0.0795 | 0.0761 | 0.2960 | 0.0210  | 0.0205 | 0.3454 | 5.5436  | 0.5939 | 54.3776  |

|                     |                                  |                           |   |         |        |        |         |        |        |         |        |          |
|---------------------|----------------------------------|---------------------------|---|---------|--------|--------|---------|--------|--------|---------|--------|----------|
| CardioEmbolicStroke | genus.unknowngenus.id.1000001215 | Inverse variance weighted | 8 | -0.0320 | 0.0580 | 0.5812 | 0.0210  | 0.0205 | 0.3454 | 5.5436  | 0.5939 | 54.3776  |
| CardioEmbolicStroke | genus.unknowngenus.id.1000001215 | Simple mode               | 8 | -0.1177 | 0.1168 | 0.3469 | 0.0210  | 0.0205 | 0.3454 | 5.5436  | 0.5939 | 54.3776  |
| CardioEmbolicStroke | genus.unknowngenus.id.1000001215 | Weighted mode             | 8 | -0.0935 | 0.0802 | 0.2817 | 0.0210  | 0.0205 | 0.3454 | 5.5436  | 0.5939 | 54.3776  |
| CardioEmbolicStroke | genus.unknowngenus.id.1000005472 | MR Egger                  | 8 | 0.3103  | 0.1297 | 0.0539 | -0.0447 | 0.0179 | 0.0466 | 16.4835 | 0.0210 | 40.2178  |
| CardioEmbolicStroke | genus.unknowngenus.id.1000005472 | Weighted median           | 8 | 0.0528  | 0.0636 | 0.4063 | -0.0447 | 0.0179 | 0.0466 | 16.4835 | 0.0210 | 40.2178  |
| CardioEmbolicStroke | genus.unknowngenus.id.1000005472 | Inverse variance weighted | 8 | 0.0118  | 0.0670 | 0.8604 | -0.0447 | 0.0179 | 0.0466 | 16.4835 | 0.0210 | 40.2178  |
| CardioEmbolicStroke | genus.unknowngenus.id.1000005472 | Simple mode               | 8 | -0.1614 | 0.1435 | 0.2979 | -0.0447 | 0.0179 | 0.0466 | 16.4835 | 0.0210 | 40.2178  |
| CardioEmbolicStroke | genus.unknowngenus.id.1000005472 | Weighted mode             | 8 | 0.0896  | 0.0693 | 0.2370 | -0.0447 | 0.0179 | 0.0466 | 16.4835 | 0.0210 | 40.2178  |
| CardioEmbolicStroke | genus.unknowngenus.id.1000005479 | MR Egger                  | 8 | -0.1298 | 0.1265 | 0.3443 | 0.0255  | 0.0175 | 0.1946 | 4.2145  | 0.7548 | 76.8119  |
| CardioEmbolicStroke | genus.unknowngenus.id.1000005479 | Weighted median           | 8 | -0.0055 | 0.0654 | 0.9332 | 0.0255  | 0.0175 | 0.1946 | 4.2145  | 0.7548 | 76.8119  |
| CardioEmbolicStroke | genus.unknowngenus.id.1000005479 | Inverse variance weighted | 8 | 0.0401  | 0.0495 | 0.4182 | 0.0255  | 0.0175 | 0.1946 | 4.2145  | 0.7548 | 76.8119  |
| CardioEmbolicStroke | genus.unknowngenus.id.1000005479 | Simple mode               | 8 | 0.0177  | 0.1188 | 0.8855 | 0.0255  | 0.0175 | 0.1946 | 4.2145  | 0.7548 | 76.8119  |
| CardioEmbolicStroke | genus.unknowngenus.id.1000005479 | Weighted mode             | 8 | -0.0232 | 0.0698 | 0.7493 | 0.0255  | 0.0175 | 0.1946 | 4.2145  | 0.7548 | 76.8119  |
| CardioEmbolicStroke | genus.unknowngenus.id.1000006162 | MR Egger                  | 8 | 0.0929  | 0.1592 | 0.5808 | -0.0200 | 0.0220 | 0.3971 | 5.6481  | 0.4637 | 47.7274  |
| CardioEmbolicStroke | genus.unknowngenus.id.1000006162 | Weighted median           | 8 | -0.0151 | 0.0791 | 0.8487 | -0.0200 | 0.0220 | 0.3971 | 5.6481  | 0.4637 | 47.7274  |
| CardioEmbolicStroke | genus.unknowngenus.id.1000006162 | Inverse variance weighted | 8 | -0.0407 | 0.0622 | 0.5130 | -0.0200 | 0.0220 | 0.3971 | 5.6481  | 0.4637 | 47.7274  |
| CardioEmbolicStroke | genus.unknowngenus.id.1000006162 | Simple mode               | 8 | -0.0916 | 0.1288 | 0.5000 | -0.0200 | 0.0220 | 0.3971 | 5.6481  | 0.4637 | 47.7274  |
| CardioEmbolicStroke | genus.unknowngenus.id.1000006162 | Weighted mode             | 8 | -0.0098 | 0.0914 | 0.9175 | -0.0200 | 0.0220 | 0.3971 | 5.6481  | 0.4637 | 47.7274  |
| CardioEmbolicStroke | genus.unknowngenus.id.1868       | MR Egger                  | 8 | 0.0367  | 0.1125 | 0.7553 | -0.0003 | 0.0155 | 0.9835 | 2.4521  | 0.8738 | 111.1831 |
| CardioEmbolicStroke | genus.unknowngenus.id.1868       | Weighted median           | 8 | 0.0437  | 0.0550 | 0.4262 | -0.0003 | 0.0155 | 0.9835 | 2.4521  | 0.8738 | 111.1831 |
| CardioEmbolicStroke | genus.unknowngenus.id.1868       | Inverse variance weighted | 8 | 0.0345  | 0.0439 | 0.4319 | -0.0003 | 0.0155 | 0.9835 | 2.4521  | 0.8738 | 111.1831 |
| CardioEmbolicStroke | genus.unknowngenus.id.1868       | Simple mode               | 8 | 0.0831  | 0.0836 | 0.3535 | -0.0003 | 0.0155 | 0.9835 | 2.4521  | 0.8738 | 111.1831 |
| CardioEmbolicStroke | genus.unknowngenus.id.1868       | Weighted mode             | 8 | 0.0539  | 0.0584 | 0.3864 | -0.0003 | 0.0155 | 0.9835 | 2.4521  | 0.8738 | 111.1831 |
| CardioEmbolicStroke | genus.unknowngenus.id.2001       | MR Egger                  | 8 | 0.0197  | 0.1331 | 0.8874 | -0.0004 | 0.0184 | 0.9814 | 8.4762  | 0.2052 | 54.0414  |
| CardioEmbolicStroke | genus.unknowngenus.id.2001       | Weighted median           | 8 | -0.0108 | 0.0575 | 0.8517 | -0.0004 | 0.0184 | 0.9814 | 8.4762  | 0.2052 | 54.0414  |
| CardioEmbolicStroke | genus.unknowngenus.id.2001       | Inverse variance weighted | 8 | 0.0167  | 0.0483 | 0.7294 | -0.0004 | 0.0184 | 0.9814 | 8.4762  | 0.2052 | 54.0414  |
| CardioEmbolicStroke | genus.unknowngenus.id.2001       | Simple mode               | 8 | 0.0337  | 0.0990 | 0.7433 | -0.0004 | 0.0184 | 0.9814 | 8.4762  | 0.2052 | 54.0414  |
| CardioEmbolicStroke | genus.unknowngenus.id.2001       | Weighted mode             | 8 | -0.0012 | 0.0578 | 0.9835 | -0.0004 | 0.0184 | 0.9814 | 8.4762  | 0.2052 | 54.0414  |
| CardioEmbolicStroke | genus.unknowngenus.id.2041       | MR Egger                  | 8 | -0.0203 | 0.1282 | 0.8793 | -0.0013 | 0.0176 | 0.9424 | 1.3756  | 0.9673 | 130.3292 |
| CardioEmbolicStroke | genus.unknowngenus.id.2041       | Weighted median           | 8 | -0.0398 | 0.0626 | 0.5251 | -0.0013 | 0.0176 | 0.9424 | 1.3756  | 0.9673 | 130.3292 |
| CardioEmbolicStroke | genus.unknowngenus.id.2041       | Inverse variance weighted | 8 | -0.0292 | 0.0500 | 0.5589 | -0.0013 | 0.0176 | 0.9424 | 1.3756  | 0.9673 | 130.3292 |
| CardioEmbolicStroke | genus.unknowngenus.id.2041       | Simple mode               | 8 | -0.0545 | 0.0890 | 0.5601 | -0.0013 | 0.0176 | 0.9424 | 1.3756  | 0.9673 | 130.3292 |
| CardioEmbolicStroke | genus.unknowngenus.id.2041       | Weighted mode             | 8 | -0.0417 | 0.0732 | 0.5865 | -0.0013 | 0.0176 | 0.9424 | 1.3756  | 0.9673 | 130.3292 |
| CardioEmbolicStroke | genus.unknowngenus.id.2071       | MR Egger                  | 8 | -0.0499 | 0.1009 | 0.6387 | -0.0016 | 0.0139 | 0.9096 | 2.2836  | 0.8919 | 96.2622  |
| CardioEmbolicStroke | genus.unknowngenus.id.2071       | Weighted median           | 8 | -0.0556 | 0.0481 | 0.2478 | -0.0016 | 0.0139 | 0.9096 | 2.2836  | 0.8919 | 96.2622  |
| CardioEmbolicStroke | genus.unknowngenus.id.2071       | Inverse variance weighted | 8 | -0.0609 | 0.0394 | 0.1227 | -0.0016 | 0.0139 | 0.9096 | 2.2836  | 0.8919 | 96.2622  |
| CardioEmbolicStroke | genus.unknowngenus.id.2071       | Simple mode               | 8 | -0.0804 | 0.0759 | 0.3246 | -0.0016 | 0.0139 | 0.9096 | 2.2836  | 0.8919 | 96.2622  |
| CardioEmbolicStroke | genus.unknowngenus.id.2071       | Weighted mode             | 8 | -0.0582 | 0.0572 | 0.3428 | -0.0016 | 0.0139 | 0.9096 | 2.2836  | 0.8919 | 96.2622  |
| CardioEmbolicStroke | genus.unknowngenus.id.2755       | MR Egger                  | 8 | -0.1374 | 0.1244 | 0.3116 | 0.0057  | 0.0171 | 0.7500 | 5.3488  | 0.4999 | 48.8421  |
| CardioEmbolicStroke | genus.unknowngenus.id.2755       | Weighted median           | 8 | -0.1245 | 0.0613 | 0.0423 | 0.0057  | 0.0171 | 0.7500 | 5.3488  | 0.4999 | 48.8421  |
| CardioEmbolicStroke | genus.unknowngenus.id.2755       | Inverse variance weighted | 8 | -0.0992 | 0.0485 | 0.0410 | 0.0057  | 0.0171 | 0.7500 | 5.3488  | 0.4999 | 48.8421  |
| CardioEmbolicStroke | genus.unknowngenus.id.2755       | Simple mode               | 8 | -0.1602 | 0.0980 | 0.1461 | 0.0057  | 0.0171 | 0.7500 | 5.3488  | 0.4999 | 48.8421  |
| CardioEmbolicStroke | genus.unknowngenus.id.2755       | Weighted mode             | 8 | -0.1299 | 0.0706 | 0.1083 | 0.0057  | 0.0171 | 0.7500 | 5.3488  | 0.4999 | 48.8421  |
| CardioEmbolicStroke | genus.unknowngenus.id.826        | MR Egger                  | 8 | 0.0356  | 0.0993 | 0.7322 | -0.0018 | 0.0136 | 0.8971 | 3.8633  | 0.6952 | 110.3338 |
| CardioEmbolicStroke | genus.unknowngenus.id.826        | Weighted median           | 8 | 0.0357  | 0.0505 | 0.4795 | -0.0018 | 0.0136 | 0.8971 | 3.8633  | 0.6952 | 110.3338 |
| CardioEmbolicStroke | genus.unknowngenus.id.826        | Inverse variance weighted | 8 | 0.0233  | 0.0387 | 0.5477 | -0.0018 | 0.0136 | 0.8971 | 3.8633  | 0.6952 | 110.3338 |
| CardioEmbolicStroke | genus.unknowngenus.id.826        | Simple mode               | 8 | 0.0498  | 0.0787 | 0.5470 | -0.0018 | 0.0136 | 0.8971 | 3.8633  | 0.6952 | 110.3338 |
| CardioEmbolicStroke | genus.unknowngenus.id.826        | Weighted mode             | 8 | 0.0498  | 0.0562 | 0.4052 | -0.0018 | 0.0136 | 0.8971 | 3.8633  | 0.6952 | 110.3338 |
| CardioEmbolicStroke | genus.unknowngenus.id.959        | MR Egger                  | 8 | 0.0881  | 0.1609 | 0.6036 | -0.0151 | 0.0223 | 0.5241 | 4.7893  | 0.5711 | 52.6703  |
| CardioEmbolicStroke | genus.unknowngenus.id.959        | Weighted median           | 8 | 0.0241  | 0.0769 | 0.7543 | -0.0151 | 0.0223 | 0.5241 | 4.7893  | 0.5711 | 52.6703  |
| CardioEmbolicStroke | genus.unknowngenus.id.959        | Inverse variance weighted | 8 | -0.0120 | 0.0630 | 0.8492 | -0.0151 | 0.0223 | 0.5241 | 4.7893  | 0.5711 | 52.6703  |
| CardioEmbolicStroke | genus.unknowngenus.id.959        | Simple mode               | 8 | 0.0401  | 0.1205 | 0.7493 | -0.0151 | 0.0223 | 0.5241 | 4.7893  | 0.5711 | 52.6703  |
| CardioEmbolicStroke | genus.unknowngenus.id.959        | Weighted mode             | 8 | 0.0287  | 0.0832 | 0.7408 | -0.0151 | 0.0223 | 0.5241 | 4.7893  | 0.5711 | 52.6703  |
| CardioEmbolicStroke | order.Actinomycetales.id.420     | MR Egger                  | 8 | 0.0458  | 0.1312 | 0.7391 | -0.0044 | 0.0180 | 0.8130 | 3.6795  | 0.7200 | 83.0387  |
| CardioEmbolicStroke | order.Actinomycetales.id.420     | Weighted median           | 8 | 0.0247  | 0.0624 | 0.6915 | -0.0044 | 0.0180 | 0.8130 | 3.6795  | 0.7200 | 83.0387  |
| CardioEmbolicStroke | order.Actinomycetales.id.420     | Inverse variance weighted | 8 | 0.0159  | 0.0510 | 0.7553 | -0.0044 | 0.0180 | 0.8130 | 3.6795  | 0.7200 | 83.0387  |
| CardioEmbolicStroke | order.Actinomycetales.id.420     | Simple mode               | 8 | 0.1053  | 0.0978 | 0.3176 | -0.0044 | 0.0180 | 0.8130 | 3.6795  | 0.7200 | 83.0387  |
| CardioEmbolicStroke | order.Actinomycetales.id.420     | Weighted mode             | 8 | 0.0257  | 0.0757 | 0.7442 | -0.0044 | 0.0180 | 0.8130 | 3.6795  | 0.7200 | 83.0387  |

|                     |                                      |                           |   |         |        |        |         |        |        |         |        |          |
|---------------------|--------------------------------------|---------------------------|---|---------|--------|--------|---------|--------|--------|---------|--------|----------|
| CardioEmbolicStroke | order. Bacillales. id. 1674          | MR Egger                  | 8 | 0.4917  | 0.1979 | 0.0475 | -0.0655 | 0.0274 | 0.0538 | 10.5239 | 0.1608 | 22.1897  |
| CardioEmbolicStroke | order. Bacillales. id. 1674          | Weighted median           | 8 | 0.1464  | 0.1012 | 0.1479 | -0.0655 | 0.0274 | 0.0538 | 10.5239 | 0.1608 | 22.1897  |
| CardioEmbolicStroke | order. Bacillales. id. 1674          | Inverse variance weighted | 8 | 0.0560  | 0.0950 | 0.5553 | -0.0655 | 0.0274 | 0.0538 | 10.5239 | 0.1608 | 22.1897  |
| CardioEmbolicStroke | order. Bacillales. id. 1674          | Simple mode               | 8 | 0.0602  | 0.1825 | 0.7511 | -0.0655 | 0.0274 | 0.0538 | 10.5239 | 0.1608 | 22.1897  |
| CardioEmbolicStroke | order. Bacillales. id. 1674          | Weighted mode             | 8 | 0.1653  | 0.1073 | 0.1672 | -0.0655 | 0.0274 | 0.0538 | 10.5239 | 0.1608 | 22.1897  |
| CardioEmbolicStroke | order. Bacteroidales. id. 913        | MR Egger                  | 8 | -0.0259 | 0.0902 | 0.7840 | 0.0047  | 0.0125 | 0.7173 | 6.9764  | 0.3230 | 94.5558  |
| CardioEmbolicStroke | order. Bacteroidales. id. 913        | Weighted median           | 8 | -0.0274 | 0.0413 | 0.5072 | 0.0047  | 0.0125 | 0.7173 | 6.9764  | 0.3230 | 94.5558  |
| CardioEmbolicStroke | order. Bacteroidales. id. 913        | Inverse variance weighted | 8 | 0.0056  | 0.0331 | 0.8645 | 0.0047  | 0.0125 | 0.7173 | 6.9764  | 0.3230 | 94.5558  |
| CardioEmbolicStroke | order. Bacteroidales. id. 913        | Simple mode               | 8 | -0.0539 | 0.0667 | 0.4458 | 0.0047  | 0.0125 | 0.7173 | 6.9764  | 0.3230 | 94.5558  |
| CardioEmbolicStroke | order. Bacteroidales. id. 913        | Weighted mode             | 8 | -0.0355 | 0.0444 | 0.4506 | 0.0047  | 0.0125 | 0.7173 | 6.9764  | 0.3230 | 94.5558  |
| CardioEmbolicStroke | order. Bifidobacteriales. id. 432    | MR Egger                  | 8 | -0.0091 | 0.0927 | 0.9253 | 0.0056  | 0.0128 | 0.6776 | 3.7831  | 0.7060 | 111.9649 |
| CardioEmbolicStroke | order. Bifidobacteriales. id. 432    | Weighted median           | 8 | 0.0252  | 0.0462 | 0.5846 | 0.0056  | 0.0128 | 0.6776 | 3.7831  | 0.7060 | 111.9649 |
| CardioEmbolicStroke | order. Bifidobacteriales. id. 432    | Inverse variance weighted | 8 | 0.0282  | 0.0363 | 0.4373 | 0.0056  | 0.0128 | 0.6776 | 3.7831  | 0.7060 | 111.9649 |
| CardioEmbolicStroke | order. Bifidobacteriales. id. 432    | Simple mode               | 8 | 0.0728  | 0.0712 | 0.3404 | 0.0056  | 0.0128 | 0.6776 | 3.7831  | 0.7060 | 111.9649 |
| CardioEmbolicStroke | order. Bifidobacteriales. id. 432    | Weighted mode             | 8 | 0.0368  | 0.0524 | 0.5056 | 0.0056  | 0.0128 | 0.6776 | 3.7831  | 0.7060 | 111.9649 |
| CardioEmbolicStroke | order. Burkholderiales. id. 2874     | MR Egger                  | 8 | -0.0520 | 0.0865 | 0.5701 | 0.0057  | 0.0120 | 0.6496 | 2.8559  | 0.8267 | 152.7088 |
| CardioEmbolicStroke | order. Burkholderiales. id. 2874     | Weighted median           | 8 | -0.0314 | 0.0399 | 0.4316 | 0.0057  | 0.0120 | 0.6496 | 2.8559  | 0.8267 | 152.7088 |
| CardioEmbolicStroke | order. Burkholderiales. id. 2874     | Inverse variance weighted | 8 | -0.0139 | 0.0339 | 0.6813 | 0.0057  | 0.0120 | 0.6496 | 2.8559  | 0.8267 | 152.7088 |
| CardioEmbolicStroke | order. Burkholderiales. id. 2874     | Simple mode               | 8 | -0.0104 | 0.0646 | 0.8767 | 0.0057  | 0.0120 | 0.6496 | 2.8559  | 0.8267 | 152.7088 |
| CardioEmbolicStroke | order. Burkholderiales. id. 2874     | Weighted mode             | 8 | -0.0273 | 0.0504 | 0.6053 | 0.0057  | 0.0120 | 0.6496 | 2.8559  | 0.8267 | 152.7088 |
| CardioEmbolicStroke | order. Clostridiales. id. 1863       | MR Egger                  | 8 | 0.0351  | 0.0836 | 0.6889 | -0.0102 | 0.0115 | 0.4128 | 5.3507  | 0.4997 | 94.4718  |
| CardioEmbolicStroke | order. Clostridiales. id. 1863       | Weighted median           | 8 | 0.0011  | 0.0409 | 0.9779 | -0.0102 | 0.0115 | 0.4128 | 5.3507  | 0.4997 | 94.4718  |
| CardioEmbolicStroke | order. Clostridiales. id. 1863       | Inverse variance weighted | 8 | -0.0325 | 0.0327 | 0.3201 | -0.0102 | 0.0115 | 0.4128 | 5.3507  | 0.4997 | 94.4718  |
| CardioEmbolicStroke | order. Clostridiales. id. 1863       | Simple mode               | 8 | -0.1414 | 0.0852 | 0.1411 | -0.0102 | 0.0115 | 0.4128 | 5.3507  | 0.4997 | 94.4718  |
| CardioEmbolicStroke | order. Clostridiales. id. 1863       | Weighted mode             | 8 | 0.0202  | 0.0481 | 0.6879 | -0.0102 | 0.0115 | 0.4128 | 5.3507  | 0.4997 | 94.4718  |
| CardioEmbolicStroke | order. Coriobacteriales. id. 810     | MR Egger                  | 8 | -0.0266 | 0.0853 | 0.7659 | 0.0110  | 0.0118 | 0.3842 | 4.0254  | 0.7768 | 99.8256  |
| CardioEmbolicStroke | order. Coriobacteriales. id. 810     | Weighted median           | 8 | 0.0240  | 0.0425 | 0.5719 | 0.0110  | 0.0118 | 0.3842 | 4.0254  | 0.7768 | 99.8256  |
| CardioEmbolicStroke | order. Coriobacteriales. id. 810     | Inverse variance weighted | 8 | 0.0471  | 0.0334 | 0.1580 | 0.0110  | 0.0118 | 0.3842 | 4.0254  | 0.7768 | 99.8256  |
| CardioEmbolicStroke | order. Coriobacteriales. id. 810     | Simple mode               | 8 | 0.0405  | 0.0690 | 0.5759 | 0.0110  | 0.0118 | 0.3842 | 4.0254  | 0.7768 | 99.8256  |
| CardioEmbolicStroke | order. Coriobacteriales. id. 810     | Weighted mode             | 8 | 0.0166  | 0.0399 | 0.6899 | 0.0110  | 0.0118 | 0.3842 | 4.0254  | 0.7768 | 99.8256  |
| CardioEmbolicStroke | order. Desulfovibrionales. id. 3156  | MR Egger                  | 8 | -0.0168 | 0.1416 | 0.9095 | -0.0084 | 0.0195 | 0.6816 | 14.1689 | 0.0278 | 50.3644  |
| CardioEmbolicStroke | order. Desulfovibrionales. id. 3156  | Weighted median           | 8 | -0.0692 | 0.0470 | 0.1408 | -0.0084 | 0.0195 | 0.6816 | 14.1689 | 0.0278 | 50.3644  |
| CardioEmbolicStroke | order. Desulfovibrionales. id. 3156  | Inverse variance weighted | 8 | -0.0729 | 0.0521 | 0.1614 | -0.0084 | 0.0195 | 0.6816 | 14.1689 | 0.0278 | 50.3644  |
| CardioEmbolicStroke | order. Desulfovibrionales. id. 3156  | Simple mode               | 8 | -0.0677 | 0.0860 | 0.4566 | -0.0084 | 0.0195 | 0.6816 | 14.1689 | 0.0278 | 50.3644  |
| CardioEmbolicStroke | order. Desulfovibrionales. id. 3156  | Weighted mode             | 8 | -0.0747 | 0.0495 | 0.1751 | -0.0084 | 0.0195 | 0.6816 | 14.1689 | 0.0278 | 50.3644  |
| CardioEmbolicStroke | order. Enterobacteriales. id. 3468   | MR Egger                  | 8 | -0.2045 | 0.0971 | 0.0799 | 0.0255  | 0.0134 | 0.1058 | 8.3208  | 0.3052 | 69.1885  |
| CardioEmbolicStroke | order. Enterobacteriales. id. 3468   | Weighted median           | 8 | -0.0775 | 0.0469 | 0.0986 | 0.0255  | 0.0134 | 0.1058 | 8.3208  | 0.3052 | 69.1885  |
| CardioEmbolicStroke | order. Enterobacteriales. id. 3468   | Inverse variance weighted | 8 | -0.0344 | 0.0414 | 0.4058 | 0.0255  | 0.0134 | 0.1058 | 8.3208  | 0.3052 | 69.1885  |
| CardioEmbolicStroke | order. Enterobacteriales. id. 3468   | Simple mode               | 8 | -0.0551 | 0.0737 | 0.4791 | 0.0255  | 0.0134 | 0.1058 | 8.3208  | 0.3052 | 69.1885  |
| CardioEmbolicStroke | order. Enterobacteriales. id. 3468   | Weighted mode             | 8 | -0.0762 | 0.0492 | 0.1656 | 0.0255  | 0.0134 | 0.1058 | 8.3208  | 0.3052 | 69.1885  |
| CardioEmbolicStroke | order. Erysipelotrichales. id. 2148  | MR Egger                  | 8 | 0.1891  | 0.0839 | 0.0651 | -0.0162 | 0.0116 | 0.2121 | 5.3006  | 0.6233 | 66.3092  |
| CardioEmbolicStroke | order. Erysipelotrichales. id. 2148  | Weighted median           | 8 | 0.0968  | 0.0418 | 0.0205 | -0.0162 | 0.0116 | 0.2121 | 5.3006  | 0.6233 | 66.3092  |
| CardioEmbolicStroke | order. Erysipelotrichales. id. 2148  | Inverse variance weighted | 8 | 0.0813  | 0.0329 | 0.0133 | -0.0162 | 0.0116 | 0.2121 | 5.3006  | 0.6233 | 66.3092  |
| CardioEmbolicStroke | order. Erysipelotrichales. id. 2148  | Simple mode               | 8 | 0.1363  | 0.0670 | 0.0813 | -0.0162 | 0.0116 | 0.2121 | 5.3006  | 0.6233 | 66.3092  |
| CardioEmbolicStroke | order. Erysipelotrichales. id. 2148  | Weighted mode             | 8 | 0.1142  | 0.0478 | 0.0484 | -0.0162 | 0.0116 | 0.2121 | 5.3006  | 0.6233 | 66.3092  |
| CardioEmbolicStroke | order. Gastranaerophilales. id. 1591 | MR Egger                  | 8 | -0.1722 | 0.1488 | 0.2909 | 0.0210  | 0.0205 | 0.3454 | 5.5436  | 0.5939 | 54.3776  |
| CardioEmbolicStroke | order. Gastranaerophilales. id. 1591 | Weighted median           | 8 | -0.0795 | 0.0744 | 0.2851 | 0.0210  | 0.0205 | 0.3454 | 5.5436  | 0.5939 | 54.3776  |
| CardioEmbolicStroke | order. Gastranaerophilales. id. 1591 | Inverse variance weighted | 8 | -0.0320 | 0.0580 | 0.5812 | 0.0210  | 0.0205 | 0.3454 | 5.5436  | 0.5939 | 54.3776  |
| CardioEmbolicStroke | order. Gastranaerophilales. id. 1591 | Simple mode               | 8 | -0.1177 | 0.1282 | 0.3891 | 0.0210  | 0.0205 | 0.3454 | 5.5436  | 0.5939 | 54.3776  |
| CardioEmbolicStroke | order. Gastranaerophilales. id. 1591 | Weighted mode             | 8 | -0.0935 | 0.0844 | 0.3046 | 0.0210  | 0.0205 | 0.3454 | 5.5436  | 0.5939 | 54.3776  |
| CardioEmbolicStroke | order. Lactobacillales. id. 1800     | MR Egger                  | 8 | 0.0234  | 0.0862 | 0.7949 | 0.0025  | 0.0119 | 0.8413 | 4.0587  | 0.6687 | 108.7633 |
| CardioEmbolicStroke | order. Lactobacillales. id. 1800     | Weighted median           | 8 | 0.0462  | 0.0417 | 0.2685 | 0.0025  | 0.0119 | 0.8413 | 4.0587  | 0.6687 | 108.7633 |
| CardioEmbolicStroke | order. Lactobacillales. id. 1800     | Inverse variance weighted | 8 | 0.0400  | 0.0337 | 0.2353 | 0.0025  | 0.0119 | 0.8413 | 4.0587  | 0.6687 | 108.7633 |
| CardioEmbolicStroke | order. Lactobacillales. id. 1800     | Simple mode               | 8 | 0.0934  | 0.0669 | 0.2054 | 0.0025  | 0.0119 | 0.8413 | 4.0587  | 0.6687 | 108.7633 |
| CardioEmbolicStroke | order. Lactobacillales. id. 1800     | Weighted mode             | 8 | 0.0474  | 0.0439 | 0.3162 | 0.0025  | 0.0119 | 0.8413 | 4.0587  | 0.6687 | 108.7633 |
| CardioEmbolicStroke | order. Methanobacteriales. id. 120   | MR Egger                  | 8 | -0.0072 | 0.1860 | 0.9704 | 0.0001  | 0.0258 | 0.9959 | 3.6140  | 0.7287 | 52.6054  |
| CardioEmbolicStroke | order. Methanobacteriales. id. 120   | Weighted median           | 8 | -0.0321 | 0.0904 | 0.7224 | 0.0001  | 0.0258 | 0.9959 | 3.6140  | 0.7287 | 52.6054  |
| CardioEmbolicStroke | order. Methanobacteriales. id. 120   | Inverse variance weighted | 8 | -0.0063 | 0.0728 | 0.9314 | 0.0001  | 0.0258 | 0.9959 | 3.6140  | 0.7287 | 52.6054  |

|                     |                                     |                           |   |         |        |        |         |        |        |         |        |          |
|---------------------|-------------------------------------|---------------------------|---|---------|--------|--------|---------|--------|--------|---------|--------|----------|
| CardioEmbolicStroke | order. Methanobacteriales. id. 120  | Simple mode               | 8 | -0.0918 | 0.1429 | 0.5408 | 0.0001  | 0.0258 | 0.9959 | 3.6140  | 0.7287 | 52.6054  |
| CardioEmbolicStroke | order. Methanobacteriales. id. 120  | Weighted mode             | 8 | -0.0433 | 0.1004 | 0.6792 | 0.0001  | 0.0258 | 0.9959 | 3.6140  | 0.7287 | 52.6054  |
| CardioEmbolicStroke | order. MollicutesRF9. id. 11579     | MR Egger                  | 8 | 0.3103  | 0.1297 | 0.0539 | -0.0447 | 0.0179 | 0.0466 | 16.4835 | 0.0210 | 40.2178  |
| CardioEmbolicStroke | order. MollicutesRF9. id. 11579     | Weighted median           | 8 | 0.0528  | 0.0634 | 0.4048 | -0.0447 | 0.0179 | 0.0466 | 16.4835 | 0.0210 | 40.2178  |
| CardioEmbolicStroke | order. MollicutesRF9. id. 11579     | Inverse variance weighted | 8 | 0.0118  | 0.0670 | 0.8604 | -0.0447 | 0.0179 | 0.0466 | 16.4835 | 0.0210 | 40.2178  |
| CardioEmbolicStroke | order. MollicutesRF9. id. 11579     | Simple mode               | 8 | -0.1614 | 0.1485 | 0.3131 | -0.0447 | 0.0179 | 0.0466 | 16.4835 | 0.0210 | 40.2178  |
| CardioEmbolicStroke | order. MollicutesRF9. id. 11579     | Weighted mode             | 8 | 0.0896  | 0.0602 | 0.1800 | -0.0447 | 0.0179 | 0.0466 | 16.4835 | 0.0210 | 40.2178  |
| CardioEmbolicStroke | order. NBln. id. 3953               | MR Egger                  | 8 | 0.0929  | 0.1592 | 0.5808 | -0.0200 | 0.0220 | 0.3971 | 5.6481  | 0.4637 | 47.7274  |
| CardioEmbolicStroke | order. NBln. id. 3953               | Weighted median           | 8 | -0.0151 | 0.0799 | 0.8502 | -0.0200 | 0.0220 | 0.3971 | 5.6481  | 0.4637 | 47.7274  |
| CardioEmbolicStroke | order. NBln. id. 3953               | Inverse variance weighted | 8 | -0.0407 | 0.0622 | 0.5130 | -0.0200 | 0.0220 | 0.3971 | 5.6481  | 0.4637 | 47.7274  |
| CardioEmbolicStroke | order. NBln. id. 3953               | Simple mode               | 8 | -0.0916 | 0.1249 | 0.4870 | -0.0200 | 0.0220 | 0.3971 | 5.6481  | 0.4637 | 47.7274  |
| CardioEmbolicStroke | order. NBln. id. 3953               | Weighted mode             | 8 | -0.0098 | 0.0854 | 0.9118 | -0.0200 | 0.0220 | 0.3971 | 5.6481  | 0.4637 | 47.7274  |
| CardioEmbolicStroke | order. Pasteurellales. id. 3688     | MR Egger                  | 8 | 0.1615  | 0.1220 | 0.2338 | -0.0131 | 0.0169 | 0.4661 | 6.6553  | 0.3539 | 49.5998  |
| CardioEmbolicStroke | order. Pasteurellales. id. 3688     | Weighted median           | 8 | 0.0987  | 0.0585 | 0.0917 | -0.0131 | 0.0169 | 0.4661 | 6.6553  | 0.3539 | 49.5998  |
| CardioEmbolicStroke | order. Pasteurellales. id. 3688     | Inverse variance weighted | 8 | 0.0742  | 0.0465 | 0.1107 | -0.0131 | 0.0169 | 0.4661 | 6.6553  | 0.3539 | 49.5998  |
| CardioEmbolicStroke | order. Pasteurellales. id. 3688     | Simple mode               | 8 | 0.0292  | 0.0994 | 0.7772 | -0.0131 | 0.0169 | 0.4661 | 6.6553  | 0.3539 | 49.5998  |
| CardioEmbolicStroke | order. Pasteurellales. id. 3688     | Weighted mode             | 8 | 0.0874  | 0.0679 | 0.2393 | -0.0131 | 0.0169 | 0.4661 | 6.6553  | 0.3539 | 49.5998  |
| CardioEmbolicStroke | order. Rhodospirillales. id. 2667   | MR Egger                  | 8 | -0.1439 | 0.1231 | 0.2867 | 0.0076  | 0.0170 | 0.6703 | 4.6817  | 0.5852 | 53.1139  |
| CardioEmbolicStroke | order. Rhodospirillales. id. 2667   | Weighted median           | 8 | -0.1209 | 0.0631 | 0.0553 | 0.0076  | 0.0170 | 0.6703 | 4.6817  | 0.5852 | 53.1139  |
| CardioEmbolicStroke | order. Rhodospirillales. id. 2667   | Inverse variance weighted | 8 | -0.0932 | 0.0481 | 0.0524 | 0.0076  | 0.0170 | 0.6703 | 4.6817  | 0.5852 | 53.1139  |
| CardioEmbolicStroke | order. Rhodospirillales. id. 2667   | Simple mode               | 8 | -0.1487 | 0.0997 | 0.1795 | 0.0076  | 0.0170 | 0.6703 | 4.6817  | 0.5852 | 53.1139  |
| CardioEmbolicStroke | order. Rhodospirillales. id. 2667   | Weighted mode             | 8 | -0.1261 | 0.0660 | 0.0978 | 0.0076  | 0.0170 | 0.6703 | 4.6817  | 0.5852 | 53.1139  |
| CardioEmbolicStroke | order. Selenomonadales. id. 2165    | MR Egger                  | 8 | -0.0162 | 0.0840 | 0.8538 | -0.0022 | 0.0116 | 0.8540 | 4.3273  | 0.6325 | 99.6021  |
| CardioEmbolicStroke | order. Selenomonadales. id. 2165    | Weighted median           | 8 | -0.0249 | 0.0427 | 0.5597 | -0.0022 | 0.0116 | 0.8540 | 4.3273  | 0.6325 | 99.6021  |
| CardioEmbolicStroke | order. Selenomonadales. id. 2165    | Inverse variance weighted | 8 | -0.0310 | 0.0329 | 0.3457 | -0.0022 | 0.0116 | 0.8540 | 4.3273  | 0.6325 | 99.6021  |
| CardioEmbolicStroke | order. Selenomonadales. id. 2165    | Simple mode               | 8 | -0.0885 | 0.0693 | 0.2425 | -0.0022 | 0.0116 | 0.8540 | 4.3273  | 0.6325 | 99.6021  |
| CardioEmbolicStroke | order. Selenomonadales. id. 2165    | Weighted mode             | 8 | -0.0179 | 0.0457 | 0.7065 | -0.0022 | 0.0116 | 0.8540 | 4.3273  | 0.6325 | 99.6021  |
| CardioEmbolicStroke | order. Verrucomicrobiales. id. 4030 | MR Egger                  | 8 | -0.0239 | 0.1047 | 0.8272 | -0.0079 | 0.0144 | 0.6020 | 2.6247  | 0.8543 | 86.4625  |
| CardioEmbolicStroke | order. Verrucomicrobiales. id. 4030 | Weighted median           | 8 | -0.0553 | 0.0509 | 0.2769 | -0.0079 | 0.0144 | 0.6020 | 2.6247  | 0.8543 | 86.4625  |
| CardioEmbolicStroke | order. Verrucomicrobiales. id. 4030 | Inverse variance weighted | 8 | -0.0769 | 0.0409 | 0.0600 | -0.0079 | 0.0144 | 0.6020 | 2.6247  | 0.8543 | 86.4625  |
| CardioEmbolicStroke | order. Verrucomicrobiales. id. 4030 | Simple mode               | 8 | -0.0600 | 0.0779 | 0.4668 | -0.0079 | 0.0144 | 0.6020 | 2.6247  | 0.8543 | 86.4625  |
| CardioEmbolicStroke | order. Verrucomicrobiales. id. 4030 | Weighted mode             | 8 | -0.0571 | 0.0565 | 0.3457 | -0.0079 | 0.0144 | 0.6020 | 2.6247  | 0.8543 | 86.4625  |
| CardioEmbolicStroke | order. Victivallales. id. 2254      | MR Egger                  | 8 | 0.0375  | 0.2082 | 0.8630 | -0.0129 | 0.0289 | 0.6698 | 9.7327  | 0.1364 | 29.5089  |
| CardioEmbolicStroke | order. Victivallales. id. 2254      | Weighted median           | 8 | -0.0376 | 0.0800 | 0.6380 | -0.0129 | 0.0289 | 0.6698 | 9.7327  | 0.1364 | 29.5089  |
| CardioEmbolicStroke | order. Victivallales. id. 2254      | Inverse variance weighted | 8 | -0.0483 | 0.0770 | 0.5307 | -0.0129 | 0.0289 | 0.6698 | 9.7327  | 0.1364 | 29.5089  |
| CardioEmbolicStroke | order. Victivallales. id. 2254      | Simple mode               | 8 | -0.0396 | 0.1284 | 0.7670 | -0.0129 | 0.0289 | 0.6698 | 9.7327  | 0.1364 | 29.5089  |
| CardioEmbolicStroke | order. Victivallales. id. 2254      | Weighted mode             | 8 | -0.0336 | 0.0899 | 0.7198 | -0.0129 | 0.0289 | 0.6698 | 9.7327  | 0.1364 | 29.5089  |
| CardioEmbolicStroke | phylum. Actinobacteria. id. 400     | MR Egger                  | 8 | 0.0046  | 0.0845 | 0.9581 | 0.0047  | 0.0117 | 0.6988 | 2.7389  | 0.8408 | 128.7637 |
| CardioEmbolicStroke | phylum. Actinobacteria. id. 400     | Weighted median           | 8 | 0.0340  | 0.0419 | 0.4171 | 0.0047  | 0.0117 | 0.6988 | 2.7389  | 0.8408 | 128.7637 |
| CardioEmbolicStroke | phylum. Actinobacteria. id. 400     | Inverse variance weighted | 8 | 0.0362  | 0.0331 | 0.2736 | 0.0047  | 0.0117 | 0.6988 | 2.7389  | 0.8408 | 128.7637 |
| CardioEmbolicStroke | phylum. Actinobacteria. id. 400     | Simple mode               | 8 | 0.0567  | 0.0633 | 0.4001 | 0.0047  | 0.0117 | 0.6988 | 2.7389  | 0.8408 | 128.7637 |
| CardioEmbolicStroke | phylum. Actinobacteria. id. 400     | Weighted mode             | 8 | 0.0355  | 0.0456 | 0.4617 | 0.0047  | 0.0117 | 0.6988 | 2.7389  | 0.8408 | 128.7637 |
| CardioEmbolicStroke | phylum. Bacteroidetes. id. 905      | MR Egger                  | 8 | -0.0314 | 0.0932 | 0.7475 | 0.0055  | 0.0129 | 0.6830 | 7.4580  | 0.2806 | 90.6964  |
| CardioEmbolicStroke | phylum. Bacteroidetes. id. 905      | Weighted median           | 8 | -0.0317 | 0.0410 | 0.4400 | 0.0055  | 0.0129 | 0.6830 | 7.4580  | 0.2806 | 90.6964  |
| CardioEmbolicStroke | phylum. Bacteroidetes. id. 905      | Inverse variance weighted | 8 | 0.0054  | 0.0343 | 0.8760 | 0.0055  | 0.0129 | 0.6830 | 7.4580  | 0.2806 | 90.6964  |
| CardioEmbolicStroke | phylum. Bacteroidetes. id. 905      | Simple mode               | 8 | -0.0511 | 0.0698 | 0.4876 | 0.0055  | 0.0129 | 0.6830 | 7.4580  | 0.2806 | 90.6964  |
| CardioEmbolicStroke | phylum. Bacteroidetes. id. 905      | Weighted mode             | 8 | -0.0381 | 0.0450 | 0.4255 | 0.0055  | 0.0129 | 0.6830 | 7.4580  | 0.2806 | 90.6964  |
| CardioEmbolicStroke | phylum. Cyanobacteria. id. 1500     | MR Egger                  | 8 | -0.1708 | 0.1584 | 0.3225 | 0.0153  | 0.0219 | 0.5096 | 8.2698  | 0.2190 | 41.1488  |
| CardioEmbolicStroke | phylum. Cyanobacteria. id. 1500     | Weighted median           | 8 | -0.1013 | 0.0708 | 0.1525 | 0.0153  | 0.0219 | 0.5096 | 8.2698  | 0.2190 | 41.1488  |
| CardioEmbolicStroke | phylum. Cyanobacteria. id. 1500     | Inverse variance weighted | 8 | -0.0686 | 0.0596 | 0.2499 | 0.0153  | 0.0219 | 0.5096 | 8.2698  | 0.2190 | 41.1488  |
| CardioEmbolicStroke | phylum. Cyanobacteria. id. 1500     | Simple mode               | 8 | -0.0899 | 0.1265 | 0.5001 | 0.0153  | 0.0219 | 0.5096 | 8.2698  | 0.2190 | 41.1488  |
| CardioEmbolicStroke | phylum. Cyanobacteria. id. 1500     | Weighted mode             | 8 | -0.1132 | 0.0719 | 0.1592 | 0.0153  | 0.0219 | 0.5096 | 8.2698  | 0.2190 | 41.1488  |
| CardioEmbolicStroke | phylum. Euryarchaeota. id. 55       | MR Egger                  | 8 | -0.0238 | 0.1812 | 0.8999 | 0.0009  | 0.0252 | 0.9729 | 2.6188  | 0.8549 | 67.5827  |
| CardioEmbolicStroke | phylum. Euryarchaeota. id. 55       | Weighted median           | 8 | -0.0461 | 0.0884 | 0.6021 | 0.0009  | 0.0252 | 0.9729 | 2.6188  | 0.8549 | 67.5827  |
| CardioEmbolicStroke | phylum. Euryarchaeota. id. 55       | Inverse variance weighted | 8 | -0.0179 | 0.0711 | 0.8016 | 0.0009  | 0.0252 | 0.9729 | 2.6188  | 0.8549 | 67.5827  |
| CardioEmbolicStroke | phylum. Euryarchaeota. id. 55       | Simple mode               | 8 | -0.0299 | 0.1372 | 0.8334 | 0.0009  | 0.0252 | 0.9729 | 2.6188  | 0.8549 | 67.5827  |
| CardioEmbolicStroke | phylum. Euryarchaeota. id. 55       | Weighted mode             | 8 | -0.0449 | 0.0998 | 0.6662 | 0.0009  | 0.0252 | 0.9729 | 2.6188  | 0.8549 | 67.5827  |
| CardioEmbolicStroke | phylum. Firmicutes. id. 1672        | MR Egger                  | 8 | 0.0454  | 0.0836 | 0.6069 | -0.0119 | 0.0115 | 0.3439 | 4.1288  | 0.7648 | 109.3872 |

|                     |                                   |                           |    |         |        |        |         |        |        |         |        |          |
|---------------------|-----------------------------------|---------------------------|----|---------|--------|--------|---------|--------|--------|---------|--------|----------|
| CardioEmbolicStroke | phylum.Firmicutes.id.1672         | Weighted median           | 8  | -0.0193 | 0.0420 | 0.6466 | -0.0119 | 0.0115 | 0.3439 | 4.1288  | 0.7648 | 109.3872 |
| CardioEmbolicStroke | phylum.Firmicutes.id.1672         | Inverse variance weighted | 8  | -0.0337 | 0.0327 | 0.3037 | -0.0119 | 0.0115 | 0.3439 | 4.1288  | 0.7648 | 109.3872 |
| CardioEmbolicStroke | phylum.Firmicutes.id.1672         | Simple mode               | 8  | -0.0941 | 0.0766 | 0.2586 | -0.0119 | 0.0115 | 0.3439 | 4.1288  | 0.7648 | 109.3872 |
| CardioEmbolicStroke | phylum.Firmicutes.id.1672         | Weighted mode             | 8  | 0.0189  | 0.0418 | 0.6645 | -0.0119 | 0.0115 | 0.3439 | 4.1288  | 0.7648 | 109.3872 |
| CardioEmbolicStroke | phylum.Lentisphaerae.id.2238      | MR Egger                  | 8  | 0.0202  | 0.2076 | 0.9257 | -0.0116 | 0.0288 | 0.7011 | 9.6852  | 0.1386 | 29.5073  |
| CardioEmbolicStroke | phylum.Lentisphaerae.id.2238      | Weighted median           | 8  | -0.0486 | 0.0778 | 0.5325 | -0.0116 | 0.0288 | 0.7011 | 9.6852  | 0.1386 | 29.5073  |
| CardioEmbolicStroke | phylum.Lentisphaerae.id.2238      | Inverse variance weighted | 8  | -0.0567 | 0.0765 | 0.4588 | -0.0116 | 0.0288 | 0.7011 | 9.6852  | 0.1386 | 29.5073  |
| CardioEmbolicStroke | phylum.Lentisphaerae.id.2238      | Simple mode               | 8  | -0.0566 | 0.1352 | 0.6882 | -0.0116 | 0.0288 | 0.7011 | 9.6852  | 0.1386 | 29.5073  |
| CardioEmbolicStroke | phylum.Lentisphaerae.id.2238      | Weighted mode             | 8  | -0.0469 | 0.0893 | 0.6158 | -0.0116 | 0.0288 | 0.7011 | 9.6852  | 0.1386 | 29.5073  |
| CardioEmbolicStroke | phylum.Proteobacteria.id.2375     | MR Egger                  | 8  | -0.1700 | 0.1089 | 0.1697 | 0.0173  | 0.0150 | 0.2946 | 12.3679 | 0.0891 | 58.9821  |
| CardioEmbolicStroke | phylum.Proteobacteria.id.2375     | Weighted median           | 8  | -0.1005 | 0.0429 | 0.0192 | 0.0173  | 0.0150 | 0.2946 | 12.3679 | 0.0891 | 58.9821  |
| CardioEmbolicStroke | phylum.Proteobacteria.id.2375     | Inverse variance weighted | 8  | -0.0549 | 0.0436 | 0.2082 | 0.0173  | 0.0150 | 0.2946 | 12.3679 | 0.0891 | 58.9821  |
| CardioEmbolicStroke | phylum.Proteobacteria.id.2375     | Simple mode               | 8  | -0.1141 | 0.0745 | 0.1699 | 0.0173  | 0.0150 | 0.2946 | 12.3679 | 0.0891 | 58.9821  |
| CardioEmbolicStroke | phylum.Proteobacteria.id.2375     | Weighted mode             | 8  | -0.1108 | 0.0463 | 0.0480 | 0.0173  | 0.0150 | 0.2946 | 12.3679 | 0.0891 | 58.9821  |
| CardioEmbolicStroke | phylum.Tenericutes.id.3919        | MR Egger                  | 8  | 0.2636  | 0.1225 | 0.0748 | -0.0435 | 0.0169 | 0.0420 | 16.6829 | 0.0196 | 44.2489  |
| CardioEmbolicStroke | phylum.Tenericutes.id.3919        | Weighted median           | 8  | 0.0277  | 0.0581 | 0.6340 | -0.0435 | 0.0169 | 0.0420 | 16.6829 | 0.0196 | 44.2489  |
| CardioEmbolicStroke | phylum.Tenericutes.id.3919        | Inverse variance weighted | 8  | -0.0269 | 0.0643 | 0.6761 | -0.0435 | 0.0169 | 0.0420 | 16.6829 | 0.0196 | 44.2489  |
| CardioEmbolicStroke | phylum.Tenericutes.id.3919        | Simple mode               | 8  | -0.1988 | 0.1510 | 0.2295 | -0.0435 | 0.0169 | 0.0420 | 16.6829 | 0.0196 | 44.2489  |
| CardioEmbolicStroke | phylum.Tenericutes.id.3919        | Weighted mode             | 8  | 0.0641  | 0.0636 | 0.3468 | -0.0435 | 0.0169 | 0.0420 | 16.6829 | 0.0196 | 44.2489  |
| CardioEmbolicStroke | phylum.Verrucomicrobia.id.3982    | MR Egger                  | 8  | -0.0567 | 0.1024 | 0.5998 | -0.0025 | 0.0141 | 0.8677 | 1.6111  | 0.9518 | 100.6720 |
| CardioEmbolicStroke | phylum.Verrucomicrobia.id.3982    | Weighted median           | 8  | -0.0704 | 0.0495 | 0.1546 | -0.0025 | 0.0141 | 0.8677 | 1.6111  | 0.9518 | 100.6720 |
| CardioEmbolicStroke | phylum.Verrucomicrobia.id.3982    | Inverse variance weighted | 8  | -0.0731 | 0.0400 | 0.0678 | -0.0025 | 0.0141 | 0.8677 | 1.6111  | 0.9518 | 100.6720 |
| CardioEmbolicStroke | phylum.Verrucomicrobia.id.3982    | Simple mode               | 8  | -0.0668 | 0.0719 | 0.3844 | -0.0025 | 0.0141 | 0.8677 | 1.6111  | 0.9518 | 100.6720 |
| CardioEmbolicStroke | phylum.Verrucomicrobia.id.3982    | Weighted mode             | 8  | -0.0693 | 0.0565 | 0.2600 | -0.0025 | 0.0141 | 0.8677 | 1.6111  | 0.9518 | 100.6720 |
| IschemicStroke      | class.Actinobacteria.id.419       | MR Egger                  | 22 | 0.2760  | 0.3267 | 0.4082 | -0.0147 | 0.0175 | 0.4118 | 31.5757 | 0.0480 | 8.0776   |
| IschemicStroke      | class.Actinobacteria.id.419       | Weighted median           | 22 | 0.0425  | 0.0806 | 0.5978 | -0.0147 | 0.0175 | 0.4118 | 31.5757 | 0.0480 | 8.0776   |
| IschemicStroke      | class.Actinobacteria.id.419       | Inverse variance weighted | 22 | 0.0085  | 0.0698 | 0.9028 | -0.0147 | 0.0175 | 0.4118 | 31.5757 | 0.0480 | 8.0776   |
| IschemicStroke      | class.Actinobacteria.id.419       | Simple mode               | 22 | 0.0362  | 0.1368 | 0.7936 | -0.0147 | 0.0175 | 0.4118 | 31.5757 | 0.0480 | 8.0776   |
| IschemicStroke      | class.Actinobacteria.id.419       | Weighted mode             | 22 | 0.0362  | 0.1075 | 0.7394 | -0.0147 | 0.0175 | 0.4118 | 31.5757 | 0.0480 | 8.0776   |
| IschemicStroke      | class.Alphaproteobacteria.id.2379 | MR Egger                  | 22 | -0.1518 | 0.3677 | 0.6840 | 0.0037  | 0.0197 | 0.8526 | 23.8427 | 0.2493 | 9.6754   |
| IschemicStroke      | class.Alphaproteobacteria.id.2379 | Weighted median           | 22 | -0.0426 | 0.0988 | 0.6666 | 0.0037  | 0.0197 | 0.8526 | 23.8427 | 0.2493 | 9.6754   |
| IschemicStroke      | class.Alphaproteobacteria.id.2379 | Inverse variance weighted | 22 | -0.0842 | 0.0771 | 0.2748 | 0.0037  | 0.0197 | 0.8526 | 23.8427 | 0.2493 | 9.6754   |
| IschemicStroke      | class.Alphaproteobacteria.id.2379 | Simple mode               | 22 | -0.0124 | 0.1831 | 0.9468 | 0.0037  | 0.0197 | 0.8526 | 23.8427 | 0.2493 | 9.6754   |
| IschemicStroke      | class.Alphaproteobacteria.id.2379 | Weighted mode             | 22 | 0.0159  | 0.1779 | 0.9296 | 0.0037  | 0.0197 | 0.8526 | 23.8427 | 0.2493 | 9.6754   |
| IschemicStroke      | class.Bacilli.id.1673             | MR Egger                  | 22 | -0.0899 | 0.2521 | 0.7251 | 0.0082  | 0.0135 | 0.5516 | 18.5429 | 0.5517 | 16.7679  |
| IschemicStroke      | class.Bacilli.id.1673             | Weighted median           | 22 | 0.0911  | 0.0733 | 0.2141 | 0.0082  | 0.0135 | 0.5516 | 18.5429 | 0.5517 | 16.7679  |
| IschemicStroke      | class.Bacilli.id.1673             | Inverse variance weighted | 22 | 0.0592  | 0.0542 | 0.2748 | 0.0082  | 0.0135 | 0.5516 | 18.5429 | 0.5517 | 16.7679  |
| IschemicStroke      | class.Bacilli.id.1673             | Simple mode               | 22 | -0.1604 | 0.1648 | 0.3415 | 0.0082  | 0.0135 | 0.5516 | 18.5429 | 0.5517 | 16.7679  |
| IschemicStroke      | class.Bacilli.id.1673             | Weighted mode             | 22 | -0.1410 | 0.1464 | 0.3465 | 0.0082  | 0.0135 | 0.5516 | 18.5429 | 0.5517 | 16.7679  |
| IschemicStroke      | class.Bacteroidia.id.912          | MR Egger                  | 22 | 0.5322  | 0.2455 | 0.0424 | -0.0274 | 0.0132 | 0.0508 | 20.3720 | 0.4978 | 15.3097  |
| IschemicStroke      | class.Bacteroidia.id.912          | Weighted median           | 22 | -0.0201 | 0.0753 | 0.7891 | -0.0274 | 0.0132 | 0.0508 | 20.3720 | 0.4978 | 15.3097  |
| IschemicStroke      | class.Bacteroidia.id.912          | Inverse variance weighted | 22 | 0.0339  | 0.0528 | 0.5207 | -0.0274 | 0.0132 | 0.0508 | 20.3720 | 0.4978 | 15.3097  |
| IschemicStroke      | class.Bacteroidia.id.912          | Simple mode               | 22 | -0.1569 | 0.1440 | 0.2881 | -0.0274 | 0.0132 | 0.0508 | 20.3720 | 0.4978 | 15.3097  |
| IschemicStroke      | class.Bacteroidia.id.912          | Weighted mode             | 22 | -0.0944 | 0.1333 | 0.4867 | -0.0274 | 0.0132 | 0.0508 | 20.3720 | 0.4978 | 15.3097  |
| IschemicStroke      | class.Betaproteobacteria.id.2867  | MR Egger                  | 22 | -0.2923 | 0.2539 | 0.2632 | 0.0175  | 0.0136 | 0.2129 | 18.3120 | 0.6292 | 14.3571  |
| IschemicStroke      | class.Betaproteobacteria.id.2867  | Weighted median           | 22 | 0.0659  | 0.0768 | 0.3910 | 0.0175  | 0.0136 | 0.2129 | 18.3120 | 0.6292 | 14.3571  |
| IschemicStroke      | class.Betaproteobacteria.id.2867  | Inverse variance weighted | 22 | 0.0267  | 0.0546 | 0.6245 | 0.0175  | 0.0136 | 0.2129 | 18.3120 | 0.6292 | 14.3571  |
| IschemicStroke      | class.Betaproteobacteria.id.2867  | Simple mode               | 22 | 0.0763  | 0.1484 | 0.6125 | 0.0175  | 0.0136 | 0.2129 | 18.3120 | 0.6292 | 14.3571  |
| IschemicStroke      | class.Betaproteobacteria.id.2867  | Weighted mode             | 22 | 0.1037  | 0.1457 | 0.4844 | 0.0175  | 0.0136 | 0.2129 | 18.3120 | 0.6292 | 14.3571  |
| IschemicStroke      | class.Clostridia.id.1859          | MR Egger                  | 22 | -0.3969 | 0.2455 | 0.1217 | 0.0191  | 0.0132 | 0.1615 | 15.7633 | 0.7828 | 17.3097  |
| IschemicStroke      | class.Clostridia.id.1859          | Weighted median           | 22 | -0.1397 | 0.0717 | 0.0512 | 0.0191  | 0.0132 | 0.1615 | 15.7633 | 0.7828 | 17.3097  |
| IschemicStroke      | class.Clostridia.id.1859          | Inverse variance weighted | 22 | -0.0483 | 0.0528 | 0.3606 | 0.0191  | 0.0132 | 0.1615 | 15.7633 | 0.7828 | 17.3097  |
| IschemicStroke      | class.Clostridia.id.1859          | Simple mode               | 22 | -0.2084 | 0.1500 | 0.1794 | 0.0191  | 0.0132 | 0.1615 | 15.7633 | 0.7828 | 17.3097  |
| IschemicStroke      | class.Clostridia.id.1859          | Weighted mode             | 22 | -0.2032 | 0.1302 | 0.1337 | 0.0191  | 0.0132 | 0.1615 | 15.7633 | 0.7828 | 17.3097  |
| IschemicStroke      | class.Coriobacteriia.id.809       | MR Egger                  | 22 | 0.1125  | 0.2584 | 0.6678 | -0.0070 | 0.0139 | 0.6180 | 21.4683 | 0.3700 | 15.3068  |
| IschemicStroke      | class.Coriobacteriia.id.809       | Weighted median           | 22 | -0.0146 | 0.0754 | 0.8464 | -0.0070 | 0.0139 | 0.6180 | 21.4683 | 0.3700 | 15.3068  |
| IschemicStroke      | class.Coriobacteriia.id.809       | Inverse variance weighted | 22 | -0.0153 | 0.0546 | 0.7797 | -0.0070 | 0.0139 | 0.6180 | 21.4683 | 0.3700 | 15.3068  |
| IschemicStroke      | class.Coriobacteriia.id.809       | Simple mode               | 22 | -0.0509 | 0.1385 | 0.7170 | -0.0070 | 0.0139 | 0.6180 | 21.4683 | 0.3700 | 15.3068  |

|                |                                   |                           |    |         |        |        |         |        |        |         |        |         |
|----------------|-----------------------------------|---------------------------|----|---------|--------|--------|---------|--------|--------|---------|--------|---------|
| IschemicStroke | class.Coriobacteriia.id.809       | Weighted mode             | 22 | -0.0057 | 0.1147 | 0.9605 | -0.0070 | 0.0139 | 0.6180 | 21.4683 | 0.3700 | 15.3068 |
| IschemicStroke | class.Deltaproteobacteria.id.3087 | MR Egger                  | 22 | 0.0140  | 0.3247 | 0.9662 | -0.0054 | 0.0174 | 0.7602 | 28.9906 | 0.0879 | 11.6102 |
| IschemicStroke | class.Deltaproteobacteria.id.3087 | Weighted median           | 22 | -0.0877 | 0.0836 | 0.2943 | -0.0054 | 0.0174 | 0.7602 | 28.9906 | 0.0879 | 11.6102 |
| IschemicStroke | class.Deltaproteobacteria.id.3087 | Inverse variance weighted | 22 | -0.0842 | 0.0683 | 0.2179 | -0.0054 | 0.0174 | 0.7602 | 28.9906 | 0.0879 | 11.6102 |
| IschemicStroke | class.Deltaproteobacteria.id.3087 | Simple mode               | 22 | -0.1062 | 0.1659 | 0.5290 | -0.0054 | 0.0174 | 0.7602 | 28.9906 | 0.0879 | 11.6102 |
| IschemicStroke | class.Deltaproteobacteria.id.3087 | Weighted mode             | 22 | -0.1232 | 0.1436 | 0.4004 | -0.0054 | 0.0174 | 0.7602 | 28.9906 | 0.0879 | 11.6102 |
| IschemicStroke | class.Erysipelotrichia.id.2147    | MR Egger                  | 22 | -0.0800 | 0.3375 | 0.8151 | 0.0039  | 0.0181 | 0.8311 | 37.5761 | 0.0100 | 9.0097  |
| IschemicStroke | class.Erysipelotrichia.id.2147    | Weighted median           | 22 | 0.0089  | 0.0816 | 0.9134 | 0.0039  | 0.0181 | 0.8311 | 37.5761 | 0.0100 | 9.0097  |
| IschemicStroke | class.Erysipelotrichia.id.2147    | Inverse variance weighted | 22 | -0.0088 | 0.0709 | 0.9014 | 0.0039  | 0.0181 | 0.8311 | 37.5761 | 0.0100 | 9.0097  |
| IschemicStroke | class.Erysipelotrichia.id.2147    | Simple mode               | 22 | -0.0217 | 0.1725 | 0.9012 | 0.0039  | 0.0181 | 0.8311 | 37.5761 | 0.0100 | 9.0097  |
| IschemicStroke | class.Erysipelotrichia.id.2147    | Weighted mode             | 22 | 0.0184  | 0.1593 | 0.9090 | 0.0039  | 0.0181 | 0.8311 | 37.5761 | 0.0100 | 9.0097  |
| IschemicStroke | class.Gammaproteobacteria.id.3303 | MR Egger                  | 22 | -0.0607 | 0.2629 | 0.8196 | 0.0053  | 0.0141 | 0.7118 | 15.4590 | 0.7496 | 17.9537 |
| IschemicStroke | class.Gammaproteobacteria.id.3303 | Weighted median           | 22 | 0.0173  | 0.0769 | 0.8224 | 0.0053  | 0.0141 | 0.7118 | 15.4590 | 0.7496 | 17.9537 |
| IschemicStroke | class.Gammaproteobacteria.id.3303 | Inverse variance weighted | 22 | 0.0355  | 0.0565 | 0.5306 | 0.0053  | 0.0141 | 0.7118 | 15.4590 | 0.7496 | 17.9537 |
| IschemicStroke | class.Gammaproteobacteria.id.3303 | Simple mode               | 22 | 0.0514  | 0.1597 | 0.7505 | 0.0053  | 0.0141 | 0.7118 | 15.4590 | 0.7496 | 17.9537 |
| IschemicStroke | class.Gammaproteobacteria.id.3303 | Weighted mode             | 22 | -0.0665 | 0.1627 | 0.6868 | 0.0053  | 0.0141 | 0.7118 | 15.4590 | 0.7496 | 17.9537 |
| IschemicStroke | class.Lentisphaeria.id.2250       | MR Egger                  | 22 | -0.0163 | 0.4958 | 0.9741 | -0.0095 | 0.0266 | 0.7257 | 21.1380 | 0.3891 | 4.1294  |
| IschemicStroke | class.Lentisphaeria.id.2250       | Weighted median           | 22 | -0.1350 | 0.1498 | 0.3672 | -0.0095 | 0.0266 | 0.7257 | 21.1380 | 0.3891 | 4.1294  |
| IschemicStroke | class.Lentisphaeria.id.2250       | Inverse variance weighted | 22 | -0.1886 | 0.1041 | 0.0700 | -0.0095 | 0.0266 | 0.7257 | 21.1380 | 0.3891 | 4.1294  |
| IschemicStroke | class.Lentisphaeria.id.2250       | Simple mode               | 22 | -0.1414 | 0.3001 | 0.6424 | -0.0095 | 0.0266 | 0.7257 | 21.1380 | 0.3891 | 4.1294  |
| IschemicStroke | class.Lentisphaeria.id.2250       | Weighted mode             | 22 | -0.1070 | 0.2946 | 0.7202 | -0.0095 | 0.0266 | 0.7257 | 21.1380 | 0.3891 | 4.1294  |
| IschemicStroke | class.Melainabacteria.id.1589     | MR Egger                  | 22 | -0.6943 | 0.4308 | 0.1227 | 0.0360  | 0.0231 | 0.1354 | 15.5626 | 0.7937 | 7.2127  |
| IschemicStroke | class.Melainabacteria.id.1589     | Weighted median           | 22 | -0.0407 | 0.1311 | 0.7563 | 0.0360  | 0.0231 | 0.1354 | 15.5626 | 0.7937 | 7.2127  |
| IschemicStroke | class.Melainabacteria.id.1589     | Inverse variance weighted | 22 | -0.0396 | 0.0924 | 0.6683 | 0.0360  | 0.0231 | 0.1354 | 15.5626 | 0.7937 | 7.2127  |
| IschemicStroke | class.Melainabacteria.id.1589     | Simple mode               | 22 | 0.3014  | 0.2487 | 0.2390 | 0.0360  | 0.0231 | 0.1354 | 15.5626 | 0.7937 | 7.2127  |
| IschemicStroke | class.Melainabacteria.id.1589     | Weighted mode             | 22 | -0.2981 | 0.2418 | 0.2312 | 0.0360  | 0.0231 | 0.1354 | 15.5626 | 0.7937 | 7.2127  |
| IschemicStroke | class.Methanobacteria.id.119      | MR Egger                  | 22 | 0.6358  | 0.5466 | 0.2584 | -0.0325 | 0.0293 | 0.2802 | 15.1870 | 0.8135 | 5.4478  |
| IschemicStroke | class.Methanobacteria.id.119      | Weighted median           | 22 | 0.0028  | 0.1656 | 0.9867 | -0.0325 | 0.0293 | 0.2802 | 15.1870 | 0.8135 | 5.4478  |
| IschemicStroke | class.Methanobacteria.id.119      | Inverse variance weighted | 22 | 0.0432  | 0.1169 | 0.7117 | -0.0325 | 0.0293 | 0.2802 | 15.1870 | 0.8135 | 5.4478  |
| IschemicStroke | class.Methanobacteria.id.119      | Simple mode               | 22 | -0.1240 | 0.2868 | 0.6700 | -0.0325 | 0.0293 | 0.2802 | 15.1870 | 0.8135 | 5.4478  |
| IschemicStroke | class.Methanobacteria.id.119      | Weighted mode             | 22 | -0.0130 | 0.2508 | 0.9593 | -0.0325 | 0.0293 | 0.2802 | 15.1870 | 0.8135 | 5.4478  |
| IschemicStroke | class.Mollicutes.id.3920          | MR Egger                  | 22 | 0.1272  | 0.3630 | 0.7296 | -0.0117 | 0.0195 | 0.5556 | 27.3576 | 0.1255 | 8.5620  |
| IschemicStroke | class.Mollicutes.id.3920          | Weighted median           | 22 | -0.0417 | 0.1000 | 0.6763 | -0.0117 | 0.0195 | 0.5556 | 27.3576 | 0.1255 | 8.5620  |
| IschemicStroke | class.Mollicutes.id.3920          | Inverse variance weighted | 22 | -0.0852 | 0.0768 | 0.2671 | -0.0117 | 0.0195 | 0.5556 | 27.3576 | 0.1255 | 8.5620  |
| IschemicStroke | class.Mollicutes.id.3920          | Simple mode               | 22 | -0.0732 | 0.1753 | 0.6807 | -0.0117 | 0.0195 | 0.5556 | 27.3576 | 0.1255 | 8.5620  |
| IschemicStroke | class.Mollicutes.id.3920          | Weighted mode             | 22 | -0.0500 | 0.1855 | 0.7904 | -0.0117 | 0.0195 | 0.5556 | 27.3576 | 0.1255 | 8.5620  |
| IschemicStroke | class.Negativicutes.id.2164       | MR Egger                  | 22 | 0.3092  | 0.2466 | 0.2243 | -0.0191 | 0.0132 | 0.1633 | 13.6508 | 0.8841 | 21.3849 |
| IschemicStroke | class.Negativicutes.id.2164       | Weighted median           | 22 | -0.0147 | 0.0739 | 0.8425 | -0.0191 | 0.0132 | 0.1633 | 13.6508 | 0.8841 | 21.3849 |
| IschemicStroke | class.Negativicutes.id.2164       | Inverse variance weighted | 22 | -0.0393 | 0.0530 | 0.4582 | -0.0191 | 0.0132 | 0.1633 | 13.6508 | 0.8841 | 21.3849 |
| IschemicStroke | class.Negativicutes.id.2164       | Simple mode               | 22 | 0.0250  | 0.1348 | 0.8547 | -0.0191 | 0.0132 | 0.1633 | 13.6508 | 0.8841 | 21.3849 |
| IschemicStroke | class.Negativicutes.id.2164       | Weighted mode             | 22 | -0.0459 | 0.1121 | 0.6864 | -0.0191 | 0.0132 | 0.1633 | 13.6508 | 0.8841 | 21.3849 |
| IschemicStroke | class.Verrucomicrobiae.id.4029    | MR Egger                  | 22 | 0.2318  | 0.3032 | 0.4536 | -0.0141 | 0.0163 | 0.3966 | 17.2073 | 0.6395 | 13.1923 |
| IschemicStroke | class.Verrucomicrobiae.id.4029    | Weighted median           | 22 | 0.0030  | 0.0925 | 0.9738 | -0.0141 | 0.0163 | 0.3966 | 17.2073 | 0.6395 | 13.1923 |
| IschemicStroke | class.Verrucomicrobiae.id.4029    | Inverse variance weighted | 22 | -0.0247 | 0.0652 | 0.7042 | -0.0141 | 0.0163 | 0.3966 | 17.2073 | 0.6395 | 13.1923 |
| IschemicStroke | class.Verrucomicrobiae.id.4029    | Simple mode               | 22 | -0.0245 | 0.1670 | 0.8847 | -0.0141 | 0.0163 | 0.3966 | 17.2073 | 0.6395 | 13.1923 |
| IschemicStroke | class.Verrucomicrobiae.id.4029    | Weighted mode             | 22 | -0.0125 | 0.1470 | 0.9331 | -0.0141 | 0.0163 | 0.3966 | 17.2073 | 0.6395 | 13.1923 |
| IschemicStroke | family.Acidaminococcaceae.id.2166 | MR Egger                  | 22 | -0.0848 | 0.2978 | 0.7787 | 0.0078  | 0.0160 | 0.6289 | 13.7341 | 0.8437 | 13.8222 |
| IschemicStroke | family.Acidaminococcaceae.id.2166 | Weighted median           | 22 | 0.1030  | 0.0865 | 0.2340 | 0.0078  | 0.0160 | 0.6289 | 13.7341 | 0.8437 | 13.8222 |
| IschemicStroke | family.Acidaminococcaceae.id.2166 | Inverse variance weighted | 22 | 0.0579  | 0.0640 | 0.3654 | 0.0078  | 0.0160 | 0.6289 | 13.7341 | 0.8437 | 13.8222 |
| IschemicStroke | family.Acidaminococcaceae.id.2166 | Simple mode               | 22 | 0.2163  | 0.1675 | 0.2106 | 0.0078  | 0.0160 | 0.6289 | 13.7341 | 0.8437 | 13.8222 |
| IschemicStroke | family.Acidaminococcaceae.id.2166 | Weighted mode             | 22 | 0.1764  | 0.1519 | 0.2587 | 0.0078  | 0.0160 | 0.6289 | 13.7341 | 0.8437 | 13.8222 |
| IschemicStroke | family.Actinomycetaceae.id.421    | MR Egger                  | 22 | 0.0131  | 0.3978 | 0.9741 | -0.0042 | 0.0213 | 0.8459 | 22.5071 | 0.3136 | 7.1352  |
| IschemicStroke | family.Actinomycetaceae.id.421    | Weighted median           | 22 | -0.0044 | 0.1110 | 0.9682 | -0.0042 | 0.0213 | 0.8459 | 22.5071 | 0.3136 | 7.1352  |
| IschemicStroke | family.Actinomycetaceae.id.421    | Inverse variance weighted | 22 | -0.0635 | 0.0834 | 0.4468 | -0.0042 | 0.0213 | 0.8459 | 22.5071 | 0.3136 | 7.1352  |
| IschemicStroke | family.Actinomycetaceae.id.421    | Simple mode               | 22 | -0.0611 | 0.2033 | 0.7667 | -0.0042 | 0.0213 | 0.8459 | 22.5071 | 0.3136 | 7.1352  |
| IschemicStroke | family.Actinomycetaceae.id.421    | Weighted mode             | 22 | -0.0242 | 0.1788 | 0.8935 | -0.0042 | 0.0213 | 0.8459 | 22.5071 | 0.3136 | 7.1352  |
| IschemicStroke | family.Alcaligenaceae.id.2875     | MR Egger                  | 22 | -0.2722 | 0.2565 | 0.3012 | 0.0188  | 0.0138 | 0.1878 | 18.5924 | 0.6113 | 14.1093 |
| IschemicStroke | family.Alcaligenaceae.id.2875     | Weighted median           | 22 | 0.0754  | 0.0772 | 0.3288 | 0.0188  | 0.0138 | 0.1878 | 18.5924 | 0.6113 | 14.1093 |

|                |                                                |                           |    |         |        |        |         |        |        |         |        |         |
|----------------|------------------------------------------------|---------------------------|----|---------|--------|--------|---------|--------|--------|---------|--------|---------|
| IschemicStroke | family. Alcaligenaceae. id. 2875               | Inverse variance weighted | 22 | 0.0694  | 0.0551 | 0.2080 | 0.0188  | 0.0138 | 0.1878 | 18.5924 | 0.6113 | 14.1093 |
| IschemicStroke | family. Alcaligenaceae. id. 2875               | Simple mode               | 22 | 0.0612  | 0.1640 | 0.7128 | 0.0188  | 0.0138 | 0.1878 | 18.5924 | 0.6113 | 14.1093 |
| IschemicStroke | family. Alcaligenaceae. id. 2875               | Weighted mode             | 22 | 0.1635  | 0.1558 | 0.3061 | 0.0188  | 0.0138 | 0.1878 | 18.5924 | 0.6113 | 14.1093 |
| IschemicStroke | family. Bacteroidaceae. id. 917                | MR Egger                  | 22 | 0.0505  | 0.3050 | 0.8702 | -0.0018 | 0.0164 | 0.9125 | 30.8054 | 0.0578 | 11.9730 |
| IschemicStroke | family. Bacteroidaceae. id. 917                | Weighted median           | 22 | 0.0341  | 0.0803 | 0.6716 | -0.0018 | 0.0164 | 0.9125 | 30.8054 | 0.0578 | 11.9730 |
| IschemicStroke | family. Bacteroidaceae. id. 917                | Inverse variance weighted | 22 | 0.0173  | 0.0640 | 0.7865 | -0.0018 | 0.0164 | 0.9125 | 30.8054 | 0.0578 | 11.9730 |
| IschemicStroke | family. Bacteroidaceae. id. 917                | Simple mode               | 22 | 0.0990  | 0.1556 | 0.5315 | -0.0018 | 0.0164 | 0.9125 | 30.8054 | 0.0578 | 11.9730 |
| IschemicStroke | family. Bacteroidaceae. id. 917                | Weighted mode             | 22 | 0.0772  | 0.1502 | 0.6125 | -0.0018 | 0.0164 | 0.9125 | 30.8054 | 0.0578 | 11.9730 |
| IschemicStroke | family. BacteroidalesS24. 7group. id. 11173    | MR Egger                  | 22 | 0.1643  | 0.3718 | 0.6632 | -0.0095 | 0.0199 | 0.6406 | 14.3645 | 0.8115 | 11.2299 |
| IschemicStroke | family. BacteroidalesS24. 7group. id. 11173    | Weighted median           | 22 | 0.0457  | 0.1134 | 0.6869 | -0.0095 | 0.0199 | 0.6406 | 14.3645 | 0.8115 | 11.2299 |
| IschemicStroke | family. BacteroidalesS24. 7group. id. 11173    | Inverse variance weighted | 22 | -0.0078 | 0.0800 | 0.9224 | -0.0095 | 0.0199 | 0.6406 | 14.3645 | 0.8115 | 11.2299 |
| IschemicStroke | family. BacteroidalesS24. 7group. id. 11173    | Simple mode               | 22 | -0.0059 | 0.2129 | 0.9781 | -0.0095 | 0.0199 | 0.6406 | 14.3645 | 0.8115 | 11.2299 |
| IschemicStroke | family. BacteroidalesS24. 7group. id. 11173    | Weighted mode             | 22 | 0.0025  | 0.1861 | 0.9896 | -0.0095 | 0.0199 | 0.6406 | 14.3645 | 0.8115 | 11.2299 |
| IschemicStroke | family. Bifidobacteriaceae. id. 433            | MR Egger                  | 22 | 0.1578  | 0.3409 | 0.6483 | -0.0081 | 0.0183 | 0.6630 | 31.3844 | 0.0503 | 8.0633  |
| IschemicStroke | family. Bifidobacteriaceae. id. 433            | Weighted median           | 22 | 0.0601  | 0.0833 | 0.4705 | -0.0081 | 0.0183 | 0.6630 | 31.3844 | 0.0503 | 8.0633  |
| IschemicStroke | family. Bifidobacteriaceae. id. 433            | Inverse variance weighted | 22 | 0.0106  | 0.0719 | 0.8827 | -0.0081 | 0.0183 | 0.6630 | 31.3844 | 0.0503 | 8.0633  |
| IschemicStroke | family. Bifidobacteriaceae. id. 433            | Simple mode               | 22 | 0.0687  | 0.1314 | 0.6065 | -0.0081 | 0.0183 | 0.6630 | 31.3844 | 0.0503 | 8.0633  |
| IschemicStroke | family. Bifidobacteriaceae. id. 433            | Weighted mode             | 22 | 0.0735  | 0.1114 | 0.5167 | -0.0081 | 0.0183 | 0.6630 | 31.3844 | 0.0503 | 8.0633  |
| IschemicStroke | family. Christensenellaceae. id. 1866          | MR Egger                  | 22 | -0.1951 | 0.2556 | 0.4543 | 0.0100  | 0.0137 | 0.4729 | 14.7042 | 0.7931 | 19.5686 |
| IschemicStroke | family. Christensenellaceae. id. 1866          | Weighted median           | 22 | -0.0476 | 0.0763 | 0.5327 | 0.0100  | 0.0137 | 0.4729 | 14.7042 | 0.7931 | 19.5686 |
| IschemicStroke | family. Christensenellaceae. id. 1866          | Inverse variance weighted | 22 | -0.0124 | 0.0549 | 0.8210 | 0.0100  | 0.0137 | 0.4729 | 14.7042 | 0.7931 | 19.5686 |
| IschemicStroke | family. Christensenellaceae. id. 1866          | Simple mode               | 22 | -0.0840 | 0.1238 | 0.5047 | 0.0100  | 0.0137 | 0.4729 | 14.7042 | 0.7931 | 19.5686 |
| IschemicStroke | family. Christensenellaceae. id. 1866          | Weighted mode             | 22 | -0.0907 | 0.1191 | 0.4548 | 0.0100  | 0.0137 | 0.4729 | 14.7042 | 0.7931 | 19.5686 |
| IschemicStroke | family. ClostridiaceaeI. id. 1869              | MR Egger                  | 22 | -0.0765 | 0.4007 | 0.8505 | 0.0018  | 0.0215 | 0.9349 | 41.4979 | 0.0032 | 8.9382  |
| IschemicStroke | family. ClostridiaceaeI. id. 1869              | Weighted median           | 22 | -0.0189 | 0.0936 | 0.8398 | 0.0018  | 0.0215 | 0.9349 | 41.4979 | 0.0032 | 8.9382  |
| IschemicStroke | family. ClostridiaceaeI. id. 1869              | Inverse variance weighted | 22 | -0.0441 | 0.0841 | 0.5996 | 0.0018  | 0.0215 | 0.9349 | 41.4979 | 0.0032 | 8.9382  |
| IschemicStroke | family. ClostridiaceaeI. id. 1869              | Simple mode               | 22 | 0.0848  | 0.1769 | 0.6365 | 0.0018  | 0.0215 | 0.9349 | 41.4979 | 0.0032 | 8.9382  |
| IschemicStroke | family. ClostridiaceaeI. id. 1869              | Weighted mode             | 22 | 0.0558  | 0.1914 | 0.7733 | 0.0018  | 0.0215 | 0.9349 | 41.4979 | 0.0032 | 8.9382  |
| IschemicStroke | family. ClostridialesvadinBB60group. id. 11286 | MR Egger                  | 22 | 0.0467  | 0.3228 | 0.8865 | -0.0046 | 0.0173 | 0.7938 | 14.8043 | 0.7875 | 14.9799 |
| IschemicStroke | family. ClostridialesvadinBB60group. id. 11286 | Weighted median           | 22 | 0.0236  | 0.0954 | 0.8044 | -0.0046 | 0.0173 | 0.7938 | 14.8043 | 0.7875 | 14.9799 |
| IschemicStroke | family. ClostridialesvadinBB60group. id. 11286 | Inverse variance weighted | 22 | -0.0368 | 0.0694 | 0.5953 | -0.0046 | 0.0173 | 0.7938 | 14.8043 | 0.7875 | 14.9799 |
| IschemicStroke | family. ClostridialesvadinBB60group. id. 11286 | Simple mode               | 22 | 0.0593  | 0.1751 | 0.7381 | -0.0046 | 0.0173 | 0.7938 | 14.8043 | 0.7875 | 14.9799 |
| IschemicStroke | family. ClostridialesvadinBB60group. id. 11286 | Weighted mode             | 22 | 0.0791  | 0.1583 | 0.6223 | -0.0046 | 0.0173 | 0.7938 | 14.8043 | 0.7875 | 14.9799 |
| IschemicStroke | family. Coriobacteriaceae. id. 811             | MR Egger                  | 22 | 0.1125  | 0.2584 | 0.6678 | -0.0070 | 0.0139 | 0.6180 | 21.4683 | 0.3700 | 15.3068 |
| IschemicStroke | family. Coriobacteriaceae. id. 811             | Weighted median           | 22 | -0.0146 | 0.0740 | 0.8434 | -0.0070 | 0.0139 | 0.6180 | 21.4683 | 0.3700 | 15.3068 |
| IschemicStroke | family. Coriobacteriaceae. id. 811             | Inverse variance weighted | 22 | -0.0153 | 0.0546 | 0.7797 | -0.0070 | 0.0139 | 0.6180 | 21.4683 | 0.3700 | 15.3068 |
| IschemicStroke | family. Coriobacteriaceae. id. 811             | Simple mode               | 22 | -0.0509 | 0.1326 | 0.7050 | -0.0070 | 0.0139 | 0.6180 | 21.4683 | 0.3700 | 15.3068 |
| IschemicStroke | family. Coriobacteriaceae. id. 811             | Weighted mode             | 22 | -0.0057 | 0.1125 | 0.9598 | -0.0070 | 0.0139 | 0.6180 | 21.4683 | 0.3700 | 15.3068 |
| IschemicStroke | family. Defluviitaleaceae. id. 1924            | MR Egger                  | 22 | -0.6308 | 0.3956 | 0.1265 | 0.0276  | 0.0212 | 0.2084 | 25.6086 | 0.2218 | 5.2146  |
| IschemicStroke | family. Defluviitaleaceae. id. 1924            | Weighted median           | 22 | -0.1221 | 0.1108 | 0.2706 | 0.0276  | 0.0212 | 0.2084 | 25.6086 | 0.2218 | 5.2146  |
| IschemicStroke | family. Defluviitaleaceae. id. 1924            | Inverse variance weighted | 22 | -0.1286 | 0.0863 | 0.1361 | 0.0276  | 0.0212 | 0.2084 | 25.6086 | 0.2218 | 5.2146  |
| IschemicStroke | family. Defluviitaleaceae. id. 1924            | Simple mode               | 22 | -0.1404 | 0.1702 | 0.4187 | 0.0276  | 0.0212 | 0.2084 | 25.6086 | 0.2218 | 5.2146  |
| IschemicStroke | family. Defluviitaleaceae. id. 1924            | Weighted mode             | 22 | -0.1456 | 0.1556 | 0.3600 | 0.0276  | 0.0212 | 0.2084 | 25.6086 | 0.2218 | 5.2146  |
| IschemicStroke | family. Desulfovibrionaceae. id. 3169          | MR Egger                  | 22 | 0.0357  | 0.3222 | 0.9130 | -0.0062 | 0.0173 | 0.7227 | 28.4818 | 0.0985 | 11.9895 |
| IschemicStroke | family. Desulfovibrionaceae. id. 3169          | Weighted median           | 22 | -0.0690 | 0.0861 | 0.4226 | -0.0062 | 0.0173 | 0.7227 | 28.4818 | 0.0985 | 11.9895 |
| IschemicStroke | family. Desulfovibrionaceae. id. 3169          | Inverse variance weighted | 22 | -0.0776 | 0.0678 | 0.2526 | -0.0062 | 0.0173 | 0.7227 | 28.4818 | 0.0985 | 11.9895 |
| IschemicStroke | family. Desulfovibrionaceae. id. 3169          | Simple mode               | 22 | -0.0693 | 0.1666 | 0.6815 | -0.0062 | 0.0173 | 0.7227 | 28.4818 | 0.0985 | 11.9895 |
| IschemicStroke | family. Desulfovibrionaceae. id. 3169          | Weighted mode             | 22 | -0.0648 | 0.1557 | 0.6814 | -0.0062 | 0.0173 | 0.7227 | 28.4818 | 0.0985 | 11.9895 |
| IschemicStroke | family. Enterobacteriaceae. id. 3469           | MR Egger                  | 22 | -0.1729 | 0.2856 | 0.5517 | 0.0069  | 0.0153 | 0.6594 | 16.5940 | 0.6792 | 14.7997 |
| IschemicStroke | family. Enterobacteriaceae. id. 3469           | Weighted median           | 22 | -0.0949 | 0.0835 | 0.2557 | 0.0069  | 0.0153 | 0.6594 | 16.5940 | 0.6792 | 14.7997 |
| IschemicStroke | family. Enterobacteriaceae. id. 3469           | Inverse variance weighted | 22 | -0.0481 | 0.0615 | 0.4335 | 0.0069  | 0.0153 | 0.6594 | 16.5940 | 0.6792 | 14.7997 |
| IschemicStroke | family. Enterobacteriaceae. id. 3469           | Simple mode               | 22 | -0.1564 | 0.1662 | 0.3575 | 0.0069  | 0.0153 | 0.6594 | 16.5940 | 0.6792 | 14.7997 |
| IschemicStroke | family. Enterobacteriaceae. id. 3469           | Weighted mode             | 22 | -0.1495 | 0.1721 | 0.3948 | 0.0069  | 0.0153 | 0.6594 | 16.5940 | 0.6792 | 14.7997 |
| IschemicStroke | family. Erysipelotrichaceae. id. 2149          | MR Egger                  | 22 | -0.0800 | 0.3375 | 0.8151 | 0.0039  | 0.0181 | 0.8311 | 37.5761 | 0.0100 | 9.0097  |
| IschemicStroke | family. Erysipelotrichaceae. id. 2149          | Weighted median           | 22 | 0.0089  | 0.0805 | 0.9122 | 0.0039  | 0.0181 | 0.8311 | 37.5761 | 0.0100 | 9.0097  |
| IschemicStroke | family. Erysipelotrichaceae. id. 2149          | Inverse variance weighted | 22 | -0.0088 | 0.0709 | 0.9014 | 0.0039  | 0.0181 | 0.8311 | 37.5761 | 0.0100 | 9.0097  |
| IschemicStroke | family. Erysipelotrichaceae. id. 2149          | Simple mode               | 22 | -0.0217 | 0.1739 | 0.9020 | 0.0039  | 0.0181 | 0.8311 | 37.5761 | 0.0100 | 9.0097  |
| IschemicStroke | family. Erysipelotrichaceae. id. 2149          | Weighted mode             | 22 | 0.0184  | 0.1459 | 0.9007 | 0.0039  | 0.0181 | 0.8311 | 37.5761 | 0.0100 | 9.0097  |

|                |                                         |                           |    |         |        |        |         |        |        |         |        |         |
|----------------|-----------------------------------------|---------------------------|----|---------|--------|--------|---------|--------|--------|---------|--------|---------|
| IschemicStroke | family. FamilyXI. id. 1936              | MR Egger                  | 19 | -0.8293 | 0.7697 | 0.2963 | 0.0361  | 0.0410 | 0.3908 | 23.1798 | 0.1435 | 1.9051  |
| IschemicStroke | family. FamilyXI. id. 1936              | Weighted median           | 19 | -0.1032 | 0.1952 | 0.5970 | 0.0361  | 0.0410 | 0.3908 | 23.1798 | 0.1435 | 1.9051  |
| IschemicStroke | family. FamilyXI. id. 1936              | Inverse variance weighted | 19 | -0.1657 | 0.1557 | 0.2873 | 0.0361  | 0.0410 | 0.3908 | 23.1798 | 0.1435 | 1.9051  |
| IschemicStroke | family. FamilyXI. id. 1936              | Simple mode               | 19 | -0.0093 | 0.3249 | 0.9774 | 0.0361  | 0.0410 | 0.3908 | 23.1798 | 0.1435 | 1.9051  |
| IschemicStroke | family. FamilyXI. id. 1936              | Weighted mode             | 19 | -0.0481 | 0.3101 | 0.8784 | 0.0361  | 0.0410 | 0.3908 | 23.1798 | 0.1435 | 1.9051  |
| IschemicStroke | family. FamilyXIII. id. 1957            | MR Egger                  | 22 | -0.3083 | 0.2695 | 0.2662 | 0.0166  | 0.0145 | 0.2653 | 23.5699 | 0.3144 | 14.9018 |
| IschemicStroke | family. FamilyXIII. id. 1957            | Weighted median           | 22 | -0.0233 | 0.0817 | 0.7752 | 0.0166  | 0.0145 | 0.2653 | 23.5699 | 0.3144 | 14.9018 |
| IschemicStroke | family. FamilyXIII. id. 1957            | Inverse variance weighted | 22 | -0.0066 | 0.0583 | 0.9094 | 0.0166  | 0.0145 | 0.2653 | 23.5699 | 0.3144 | 14.9018 |
| IschemicStroke | family. FamilyXIII. id. 1957            | Simple mode               | 22 | -0.0199 | 0.1721 | 0.9090 | 0.0166  | 0.0145 | 0.2653 | 23.5699 | 0.3144 | 14.9018 |
| IschemicStroke | family. FamilyXIII. id. 1957            | Weighted mode             | 22 | -0.0620 | 0.1871 | 0.7436 | 0.0166  | 0.0145 | 0.2653 | 23.5699 | 0.3144 | 14.9018 |
| IschemicStroke | family. Lachnospiraceae. id. 1987       | MR Egger                  | 22 | -0.2608 | 0.2455 | 0.3007 | 0.0125  | 0.0132 | 0.3540 | 11.4069 | 0.9543 | 23.7393 |
| IschemicStroke | family. Lachnospiraceae. id. 1987       | Weighted median           | 22 | -0.0241 | 0.0678 | 0.7225 | 0.0125  | 0.0132 | 0.3540 | 11.4069 | 0.9543 | 23.7393 |
| IschemicStroke | family. Lachnospiraceae. id. 1987       | Inverse variance weighted | 22 | -0.0333 | 0.0528 | 0.5277 | 0.0125  | 0.0132 | 0.3540 | 11.4069 | 0.9543 | 23.7393 |
| IschemicStroke | family. Lachnospiraceae. id. 1987       | Simple mode               | 22 | -0.0084 | 0.1255 | 0.9475 | 0.0125  | 0.0132 | 0.3540 | 11.4069 | 0.9543 | 23.7393 |
| IschemicStroke | family. Lachnospiraceae. id. 1987       | Weighted mode             | 22 | -0.0106 | 0.1121 | 0.9258 | 0.0125  | 0.0132 | 0.3540 | 11.4069 | 0.9543 | 23.7393 |
| IschemicStroke | family. Lactobacillaceae. id. 1836      | MR Egger                  | 22 | -0.2637 | 0.4049 | 0.5222 | 0.0132  | 0.0217 | 0.5509 | 20.7812 | 0.4101 | 6.4642  |
| IschemicStroke | family. Lactobacillaceae. id. 1836      | Weighted median           | 22 | 0.0067  | 0.1258 | 0.9576 | 0.0132  | 0.0217 | 0.5509 | 20.7812 | 0.4101 | 6.4642  |
| IschemicStroke | family. Lactobacillaceae. id. 1836      | Inverse variance weighted | 22 | -0.0238 | 0.0856 | 0.7808 | 0.0132  | 0.0217 | 0.5509 | 20.7812 | 0.4101 | 6.4642  |
| IschemicStroke | family. Lactobacillaceae. id. 1836      | Simple mode               | 22 | 0.0401  | 0.2022 | 0.8446 | 0.0132  | 0.0217 | 0.5509 | 20.7812 | 0.4101 | 6.4642  |
| IschemicStroke | family. Lactobacillaceae. id. 1836      | Weighted mode             | 22 | 0.0078  | 0.1966 | 0.9687 | 0.0132  | 0.0217 | 0.5509 | 20.7812 | 0.4101 | 6.4642  |
| IschemicStroke | family. Methanobacteriaceae. id. 121    | MR Egger                  | 22 | 0.6358  | 0.5466 | 0.2584 | -0.0325 | 0.0293 | 0.2802 | 15.1870 | 0.8135 | 5.4478  |
| IschemicStroke | family. Methanobacteriaceae. id. 121    | Weighted median           | 22 | 0.0028  | 0.1703 | 0.9871 | -0.0325 | 0.0293 | 0.2802 | 15.1870 | 0.8135 | 5.4478  |
| IschemicStroke | family. Methanobacteriaceae. id. 121    | Inverse variance weighted | 22 | 0.0432  | 0.1169 | 0.7117 | -0.0325 | 0.0293 | 0.2802 | 15.1870 | 0.8135 | 5.4478  |
| IschemicStroke | family. Methanobacteriaceae. id. 121    | Simple mode               | 22 | -0.1240 | 0.2967 | 0.6803 | -0.0325 | 0.0293 | 0.2802 | 15.1870 | 0.8135 | 5.4478  |
| IschemicStroke | family. Methanobacteriaceae. id. 121    | Weighted mode             | 22 | -0.0130 | 0.2492 | 0.9590 | -0.0325 | 0.0293 | 0.2802 | 15.1870 | 0.8135 | 5.4478  |
| IschemicStroke | family. Oxalobacteraceae. id. 2966      | MR Egger                  | 22 | 0.0417  | 0.4675 | 0.9298 | 0.0005  | 0.0251 | 0.9833 | 20.6195 | 0.4198 | 5.6082  |
| IschemicStroke | family. Oxalobacteraceae. id. 2966      | Weighted median           | 22 | 0.0928  | 0.1395 | 0.5059 | 0.0005  | 0.0251 | 0.9833 | 20.6195 | 0.4198 | 5.6082  |
| IschemicStroke | family. Oxalobacteraceae. id. 2966      | Inverse variance weighted | 22 | 0.0514  | 0.0988 | 0.6027 | 0.0005  | 0.0251 | 0.9833 | 20.6195 | 0.4198 | 5.6082  |
| IschemicStroke | family. Oxalobacteraceae. id. 2966      | Simple mode               | 22 | 0.0998  | 0.2525 | 0.6965 | 0.0005  | 0.0251 | 0.9833 | 20.6195 | 0.4198 | 5.6082  |
| IschemicStroke | family. Oxalobacteraceae. id. 2966      | Weighted mode             | 22 | 0.1683  | 0.2394 | 0.4897 | 0.0005  | 0.0251 | 0.9833 | 20.6195 | 0.4198 | 5.6082  |
| IschemicStroke | family. Pasteurellaceae. id. 3689       | MR Egger                  | 22 | 0.5744  | 0.3437 | 0.1103 | -0.0275 | 0.0184 | 0.1516 | 14.9125 | 0.8273 | 12.5861 |
| IschemicStroke | family. Pasteurellaceae. id. 3689       | Weighted median           | 22 | 0.0919  | 0.0965 | 0.3405 | -0.0275 | 0.0184 | 0.1516 | 14.9125 | 0.8273 | 12.5861 |
| IschemicStroke | family. Pasteurellaceae. id. 3689       | Inverse variance weighted | 22 | 0.0739  | 0.0739 | 0.3175 | -0.0275 | 0.0184 | 0.1516 | 14.9125 | 0.8273 | 12.5861 |
| IschemicStroke | family. Pasteurellaceae. id. 3689       | Simple mode               | 22 | 0.1354  | 0.1831 | 0.4678 | -0.0275 | 0.0184 | 0.1516 | 14.9125 | 0.8273 | 12.5861 |
| IschemicStroke | family. Pasteurellaceae. id. 3689       | Weighted mode             | 22 | 0.0999  | 0.1702 | 0.5637 | -0.0275 | 0.0184 | 0.1516 | 14.9125 | 0.8273 | 12.5861 |
| IschemicStroke | family. Peptococcaceae. id. 2024        | MR Egger                  | 22 | -0.5384 | 0.3192 | 0.1072 | 0.0318  | 0.0171 | 0.0780 | 22.4878 | 0.3719 | 10.9547 |
| IschemicStroke | family. Peptococcaceae. id. 2024        | Weighted median           | 22 | -0.0655 | 0.0970 | 0.4994 | 0.0318  | 0.0171 | 0.0780 | 22.4878 | 0.3719 | 10.9547 |
| IschemicStroke | family. Peptococcaceae. id. 2024        | Inverse variance weighted | 22 | 0.0406  | 0.0709 | 0.5667 | 0.0318  | 0.0171 | 0.0780 | 22.4878 | 0.3719 | 10.9547 |
| IschemicStroke | family. Peptococcaceae. id. 2024        | Simple mode               | 22 | -0.0223 | 0.1775 | 0.9010 | 0.0318  | 0.0171 | 0.0780 | 22.4878 | 0.3719 | 10.9547 |
| IschemicStroke | family. Peptococcaceae. id. 2024        | Weighted mode             | 22 | -0.0659 | 0.1469 | 0.6582 | 0.0318  | 0.0171 | 0.0780 | 22.4878 | 0.3719 | 10.9547 |
| IschemicStroke | family. Peptostreptococcaceae. id. 2042 | MR Egger                  | 22 | 0.4685  | 0.2778 | 0.1072 | -0.0252 | 0.0149 | 0.1059 | 25.6725 | 0.2192 | 11.6942 |
| IschemicStroke | family. Peptostreptococcaceae. id. 2042 | Weighted median           | 22 | 0.0199  | 0.0824 | 0.8092 | -0.0252 | 0.0149 | 0.1059 | 25.6725 | 0.2192 | 11.6942 |
| IschemicStroke | family. Peptostreptococcaceae. id. 2042 | Inverse variance weighted | 22 | 0.0091  | 0.0623 | 0.8838 | -0.0252 | 0.0149 | 0.1059 | 25.6725 | 0.2192 | 11.6942 |
| IschemicStroke | family. Peptostreptococcaceae. id. 2042 | Simple mode               | 22 | -0.0221 | 0.1821 | 0.9047 | -0.0252 | 0.0149 | 0.1059 | 25.6725 | 0.2192 | 11.6942 |
| IschemicStroke | family. Peptostreptococcaceae. id. 2042 | Weighted mode             | 22 | -0.0024 | 0.1789 | 0.9895 | -0.0252 | 0.0149 | 0.1059 | 25.6725 | 0.2192 | 11.6942 |
| IschemicStroke | family. Porphyromonadaceae. id. 943     | MR Egger                  | 22 | -0.1013 | 0.2645 | 0.7058 | 0.0089  | 0.0142 | 0.5377 | 22.8303 | 0.2972 | 13.6167 |
| IschemicStroke | family. Porphyromonadaceae. id. 943     | Weighted median           | 22 | 0.1015  | 0.0782 | 0.1946 | 0.0089  | 0.0142 | 0.5377 | 22.8303 | 0.2972 | 13.6167 |
| IschemicStroke | family. Porphyromonadaceae. id. 943     | Inverse variance weighted | 22 | 0.0607  | 0.0561 | 0.2787 | 0.0089  | 0.0142 | 0.5377 | 22.8303 | 0.2972 | 13.6167 |
| IschemicStroke | family. Porphyromonadaceae. id. 943     | Simple mode               | 22 | 0.0993  | 0.1522 | 0.5214 | 0.0089  | 0.0142 | 0.5377 | 22.8303 | 0.2972 | 13.6167 |
| IschemicStroke | family. Porphyromonadaceae. id. 943     | Weighted mode             | 22 | 0.0754  | 0.1241 | 0.5499 | 0.0089  | 0.0142 | 0.5377 | 22.8303 | 0.2972 | 13.6167 |
| IschemicStroke | family. Prevotellaceae. id. 960         | MR Egger                  | 22 | 0.5870  | 0.2735 | 0.0443 | -0.0326 | 0.0147 | 0.0378 | 20.0007 | 0.5212 | 15.2621 |
| IschemicStroke | family. Prevotellaceae. id. 960         | Weighted median           | 22 | -0.0171 | 0.0842 | 0.8390 | -0.0326 | 0.0147 | 0.0378 | 20.0007 | 0.5212 | 15.2621 |
| IschemicStroke | family. Prevotellaceae. id. 960         | Inverse variance weighted | 22 | -0.0071 | 0.0588 | 0.9042 | -0.0326 | 0.0147 | 0.0378 | 20.0007 | 0.5212 | 15.2621 |
| IschemicStroke | family. Prevotellaceae. id. 960         | Simple mode               | 22 | -0.0866 | 0.1727 | 0.6213 | -0.0326 | 0.0147 | 0.0378 | 20.0007 | 0.5212 | 15.2621 |
| IschemicStroke | family. Prevotellaceae. id. 960         | Weighted mode             | 22 | -0.0641 | 0.1533 | 0.6800 | -0.0326 | 0.0147 | 0.0378 | 20.0007 | 0.5212 | 15.2621 |
| IschemicStroke | family. Rhodospirillaceae. id. 2717     | MR Egger                  | 22 | -0.1215 | 0.3573 | 0.7374 | 0.0036  | 0.0192 | 0.8534 | 16.3739 | 0.6932 | 11.3374 |
| IschemicStroke | family. Rhodospirillaceae. id. 2717     | Weighted median           | 22 | -0.0107 | 0.1041 | 0.9179 | 0.0036  | 0.0192 | 0.8534 | 16.3739 | 0.6932 | 11.3374 |
| IschemicStroke | family. Rhodospirillaceae. id. 2717     | Inverse variance weighted | 22 | -0.0562 | 0.0766 | 0.4638 | 0.0036  | 0.0192 | 0.8534 | 16.3739 | 0.6932 | 11.3374 |

|                |                                                     |                           |    |         |        |        |         |        |        |         |        |         |
|----------------|-----------------------------------------------------|---------------------------|----|---------|--------|--------|---------|--------|--------|---------|--------|---------|
| IschemicStroke | family. Rhodospirillaceae. id. 2717                 | Simple mode               | 22 | 0.0014  | 0.1991 | 0.9945 | 0.0036  | 0.0192 | 0.8534 | 16.3739 | 0.6932 | 11.3374 |
| IschemicStroke | family. Rhodospirillaceae. id. 2717                 | Weighted mode             | 22 | 0.0318  | 0.1841 | 0.8647 | 0.0036  | 0.0192 | 0.8534 | 16.3739 | 0.6932 | 11.3374 |
| IschemicStroke | family. Rikenellaceae. id. 967                      | MR Egger                  | 22 | -0.0577 | 0.2761 | 0.8366 | 0.0011  | 0.0148 | 0.9415 | 24.4310 | 0.2241 | 11.7607 |
| IschemicStroke | family. Rikenellaceae. id. 967                      | Weighted median           | 22 | 0.0058  | 0.0796 | 0.9414 | 0.0011  | 0.0148 | 0.9415 | 24.4310 | 0.2241 | 11.7607 |
| IschemicStroke | family. Rikenellaceae. id. 967                      | Inverse variance weighted | 22 | -0.0376 | 0.0579 | 0.5159 | 0.0011  | 0.0148 | 0.9415 | 24.4310 | 0.2241 | 11.7607 |
| IschemicStroke | family. Rikenellaceae. id. 967                      | Simple mode               | 22 | 0.0357  | 0.1371 | 0.7968 | 0.0011  | 0.0148 | 0.9415 | 24.4310 | 0.2241 | 11.7607 |
| IschemicStroke | family. Rikenellaceae. id. 967                      | Weighted mode             | 22 | 0.0249  | 0.1281 | 0.8479 | 0.0011  | 0.0148 | 0.9415 | 24.4310 | 0.2241 | 11.7607 |
| IschemicStroke | family. Ruminococcaceae. id. 2050                   | MR Egger                  | 22 | -0.5178 | 0.2455 | 0.0478 | 0.0235  | 0.0132 | 0.0900 | 16.1631 | 0.7604 | 15.9203 |
| IschemicStroke | family. Ruminococcaceae. id. 2050                   | Weighted median           | 22 | -0.0662 | 0.0719 | 0.3570 | 0.0235  | 0.0132 | 0.0900 | 16.1631 | 0.7604 | 15.9203 |
| IschemicStroke | family. Ruminococcaceae. id. 2050                   | Inverse variance weighted | 22 | -0.0906 | 0.0528 | 0.0860 | 0.0235  | 0.0132 | 0.0900 | 16.1631 | 0.7604 | 15.9203 |
| IschemicStroke | family. Ruminococcaceae. id. 2050                   | Simple mode               | 22 | -0.0389 | 0.1293 | 0.7666 | 0.0235  | 0.0132 | 0.0900 | 16.1631 | 0.7604 | 15.9203 |
| IschemicStroke | family. Ruminococcaceae. id. 2050                   | Weighted mode             | 22 | -0.0597 | 0.1168 | 0.6146 | 0.0235  | 0.0132 | 0.0900 | 16.1631 | 0.7604 | 15.9203 |
| IschemicStroke | family. Streptococcaceae. id. 1850                  | MR Egger                  | 22 | -0.1757 | 0.2816 | 0.5397 | 0.0105  | 0.0151 | 0.4964 | 23.9283 | 0.2455 | 12.6981 |
| IschemicStroke | family. Streptococcaceae. id. 1850                  | Weighted median           | 22 | 0.0561  | 0.0823 | 0.4957 | 0.0105  | 0.0151 | 0.4964 | 23.9283 | 0.2455 | 12.6981 |
| IschemicStroke | family. Streptococcaceae. id. 1850                  | Inverse variance weighted | 22 | 0.0148  | 0.0598 | 0.8043 | 0.0105  | 0.0151 | 0.4964 | 23.9283 | 0.2455 | 12.6981 |
| IschemicStroke | family. Streptococcaceae. id. 1850                  | Simple mode               | 22 | 0.0416  | 0.1720 | 0.8114 | 0.0105  | 0.0151 | 0.4964 | 23.9283 | 0.2455 | 12.6981 |
| IschemicStroke | family. Streptococcaceae. id. 1850                  | Weighted mode             | 22 | 0.0895  | 0.1432 | 0.5389 | 0.0105  | 0.0151 | 0.4964 | 23.9283 | 0.2455 | 12.6981 |
| IschemicStroke | family. Veillonellaceae. id. 2172                   | MR Egger                  | 22 | 0.1589  | 0.2633 | 0.5530 | -0.0144 | 0.0141 | 0.3199 | 20.4991 | 0.4899 | 13.8114 |
| IschemicStroke | family. Veillonellaceae. id. 2172                   | Weighted median           | 22 | -0.1104 | 0.0775 | 0.1539 | -0.0144 | 0.0141 | 0.3199 | 20.4991 | 0.4899 | 13.8114 |
| IschemicStroke | family. Veillonellaceae. id. 2172                   | Inverse variance weighted | 22 | -0.1034 | 0.0566 | 0.0679 | -0.0144 | 0.0141 | 0.3199 | 20.4991 | 0.4899 | 13.8114 |
| IschemicStroke | family. Veillonellaceae. id. 2172                   | Simple mode               | 22 | -0.2484 | 0.1622 | 0.1405 | -0.0144 | 0.0141 | 0.3199 | 20.4991 | 0.4899 | 13.8114 |
| IschemicStroke | family. Veillonellaceae. id. 2172                   | Weighted mode             | 22 | -0.1366 | 0.1378 | 0.3329 | -0.0144 | 0.0141 | 0.3199 | 20.4991 | 0.4899 | 13.8114 |
| IschemicStroke | family. Verrucomicrobiaceae. id. 4036               | MR Egger                  | 22 | 0.2323  | 0.3032 | 0.4527 | -0.0141 | 0.0163 | 0.3956 | 17.2573 | 0.6362 | 13.1542 |
| IschemicStroke | family. Verrucomicrobiaceae. id. 4036               | Weighted median           | 22 | 0.0012  | 0.0942 | 0.9897 | -0.0141 | 0.0163 | 0.3956 | 17.2573 | 0.6362 | 13.1542 |
| IschemicStroke | family. Verrucomicrobiaceae. id. 4036               | Inverse variance weighted | 22 | -0.0248 | 0.0652 | 0.7031 | -0.0141 | 0.0163 | 0.3956 | 17.2573 | 0.6362 | 13.1542 |
| IschemicStroke | family. Verrucomicrobiaceae. id. 4036               | Simple mode               | 22 | -0.0229 | 0.1652 | 0.8909 | -0.0141 | 0.0163 | 0.3956 | 17.2573 | 0.6362 | 13.1542 |
| IschemicStroke | family. Verrucomicrobiaceae. id. 4036               | Weighted mode             | 22 | -0.0149 | 0.1664 | 0.9294 | -0.0141 | 0.0163 | 0.3956 | 17.2573 | 0.6362 | 13.1542 |
| IschemicStroke | family. Victivallaceae. id. 2255                    | MR Egger                  | 22 | -0.0714 | 0.5450 | 0.8971 | -0.0078 | 0.0293 | 0.7915 | 21.2500 | 0.3825 | 3.3266  |
| IschemicStroke | family. Victivallaceae. id. 2255                    | Weighted median           | 22 | -0.2637 | 0.1655 | 0.1111 | -0.0078 | 0.0293 | 0.7915 | 21.2500 | 0.3825 | 3.3266  |
| IschemicStroke | family. Victivallaceae. id. 2255                    | Inverse variance weighted | 22 | -0.2140 | 0.1142 | 0.0609 | -0.0078 | 0.0293 | 0.7915 | 21.2500 | 0.3825 | 3.3266  |
| IschemicStroke | family. Victivallaceae. id. 2255                    | Simple mode               | 22 | -0.3369 | 0.3070 | 0.2849 | -0.0078 | 0.0293 | 0.7915 | 21.2500 | 0.3825 | 3.3266  |
| IschemicStroke | family. Victivallaceae. id. 2255                    | Weighted mode             | 22 | -0.2818 | 0.2891 | 0.3407 | -0.0078 | 0.0293 | 0.7915 | 21.2500 | 0.3825 | 3.3266  |
| IschemicStroke | family. unknownfamily. id. 1000001214               | MR Egger                  | 22 | -0.6820 | 0.4312 | 0.1294 | 0.0349  | 0.0231 | 0.1468 | 15.6475 | 0.7891 | 7.1671  |
| IschemicStroke | family. unknownfamily. id. 1000001214               | Weighted median           | 22 | -0.0669 | 0.1326 | 0.6140 | 0.0349  | 0.0231 | 0.1468 | 15.6475 | 0.7891 | 7.1671  |
| IschemicStroke | family. unknownfamily. id. 1000001214               | Inverse variance weighted | 22 | -0.0463 | 0.0925 | 0.6166 | 0.0349  | 0.0231 | 0.1468 | 15.6475 | 0.7891 | 7.1671  |
| IschemicStroke | family. unknownfamily. id. 1000001214               | Simple mode               | 22 | 0.3021  | 0.2631 | 0.2638 | 0.0349  | 0.0231 | 0.1468 | 15.6475 | 0.7891 | 7.1671  |
| IschemicStroke | family. unknownfamily. id. 1000001214               | Weighted mode             | 22 | -0.3119 | 0.2349 | 0.1986 | 0.0349  | 0.0231 | 0.1468 | 15.6475 | 0.7891 | 7.1671  |
| IschemicStroke | family. unknownfamily. id. 1000005471               | MR Egger                  | 22 | 0.5313  | 0.3477 | 0.1422 | -0.0328 | 0.0186 | 0.0936 | 26.3462 | 0.1936 | 9.0704  |
| IschemicStroke | family. unknownfamily. id. 1000005471               | Weighted median           | 22 | -0.0650 | 0.1040 | 0.5320 | -0.0328 | 0.0186 | 0.0936 | 26.3462 | 0.1936 | 9.0704  |
| IschemicStroke | family. unknownfamily. id. 1000005471               | Inverse variance weighted | 22 | -0.0665 | 0.0784 | 0.3962 | -0.0328 | 0.0186 | 0.0936 | 26.3462 | 0.1936 | 9.0704  |
| IschemicStroke | family. unknownfamily. id. 1000005471               | Simple mode               | 22 | -0.0735 | 0.1975 | 0.7134 | -0.0328 | 0.0186 | 0.0936 | 26.3462 | 0.1936 | 9.0704  |
| IschemicStroke | family. unknownfamily. id. 1000005471               | Weighted mode             | 22 | -0.0930 | 0.1873 | 0.6247 | -0.0328 | 0.0186 | 0.0936 | 26.3462 | 0.1936 | 9.0704  |
| IschemicStroke | family. unknownfamily. id. 1000006161               | MR Egger                  | 22 | -0.8215 | 0.6032 | 0.1884 | 0.0406  | 0.0324 | 0.2240 | 37.0129 | 0.0168 | 3.7515  |
| IschemicStroke | family. unknownfamily. id. 1000006161               | Weighted median           | 22 | -0.0518 | 0.1526 | 0.7340 | 0.0406  | 0.0324 | 0.2240 | 37.0129 | 0.0168 | 3.7515  |
| IschemicStroke | family. unknownfamily. id. 1000006161               | Inverse variance weighted | 22 | -0.0823 | 0.1312 | 0.5307 | 0.0406  | 0.0324 | 0.2240 | 37.0129 | 0.0168 | 3.7515  |
| IschemicStroke | family. unknownfamily. id. 1000006161               | Simple mode               | 22 | -0.0443 | 0.2680 | 0.8703 | 0.0406  | 0.0324 | 0.2240 | 37.0129 | 0.0168 | 3.7515  |
| IschemicStroke | family. unknownfamily. id. 1000006161               | Weighted mode             | 22 | -0.0682 | 0.2733 | 0.8054 | 0.0406  | 0.0324 | 0.2240 | 37.0129 | 0.0168 | 3.7515  |
| IschemicStroke | genus. Clostridiuminnocuumgroup. id. 14397          | MR Egger                  | 22 | 0.4291  | 0.6072 | 0.4879 | -0.0175 | 0.0325 | 0.5972 | 27.9942 | 0.1095 | 3.1874  |
| IschemicStroke | genus. Clostridiuminnocuumgroup. id. 14397          | Weighted median           | 22 | 0.2104  | 0.1642 | 0.2001 | -0.0175 | 0.0325 | 0.5972 | 27.9942 | 0.1095 | 3.1874  |
| IschemicStroke | genus. Clostridiuminnocuumgroup. id. 14397          | Inverse variance weighted | 22 | 0.1107  | 0.1281 | 0.3877 | -0.0175 | 0.0325 | 0.5972 | 27.9942 | 0.1095 | 3.1874  |
| IschemicStroke | genus. Clostridiuminnocuumgroup. id. 14397          | Simple mode               | 22 | 0.3833  | 0.3623 | 0.3021 | -0.0175 | 0.0325 | 0.5972 | 27.9942 | 0.1095 | 3.1874  |
| IschemicStroke | genus. Clostridiuminnocuumgroup. id. 14397          | Weighted mode             | 22 | 0.3912  | 0.3030 | 0.2107 | -0.0175 | 0.0325 | 0.5972 | 27.9942 | 0.1095 | 3.1874  |
| IschemicStroke | genus. Eubacteriumbrachygroup. id. 11296            | MR Egger                  | 22 | -0.9608 | 0.5219 | 0.0805 | 0.0458  | 0.0280 | 0.1171 | 21.9984 | 0.3996 | 4.7827  |
| IschemicStroke | genus. Eubacteriumbrachygroup. id. 11296            | Weighted median           | 22 | -0.1007 | 0.1564 | 0.5197 | 0.0458  | 0.0280 | 0.1171 | 21.9984 | 0.3996 | 4.7827  |
| IschemicStroke | genus. Eubacteriumbrachygroup. id. 11296            | Inverse variance weighted | 22 | -0.1258 | 0.1145 | 0.2718 | 0.0458  | 0.0280 | 0.1171 | 21.9984 | 0.3996 | 4.7827  |
| IschemicStroke | genus. Eubacteriumbrachygroup. id. 11296            | Simple mode               | 22 | -0.0129 | 0.2901 | 0.9648 | 0.0458  | 0.0280 | 0.1171 | 21.9984 | 0.3996 | 4.7827  |
| IschemicStroke | genus. Eubacteriumbrachygroup. id. 11296            | Weighted mode             | 22 | -0.0837 | 0.2518 | 0.7429 | 0.0458  | 0.0280 | 0.1171 | 21.9984 | 0.3996 | 4.7827  |
| IschemicStroke | genus. Eubacteriumcoprostanoligenesgroup. id. 11375 | MR Egger                  | 22 | 0.2805  | 0.2519 | 0.2786 | -0.0148 | 0.0135 | 0.2873 | 20.0281 | 0.5195 | 13.9965 |

|                |                                                     |                           |    |         |        |        |         |        |        |         |        |         |
|----------------|-----------------------------------------------------|---------------------------|----|---------|--------|--------|---------|--------|--------|---------|--------|---------|
| IschemicStroke | genus..Eubacteriumcoprostanoligenesgroup. id. 11375 | Weighted median           | 22 | 0.0267  | 0.0757 | 0.7248 | -0.0148 | 0.0135 | 0.2873 | 20.0281 | 0.5195 | 13.9965 |
| IschemicStroke | genus..Eubacteriumcoprostanoligenesgroup. id. 11375 | Inverse variance weighted | 22 | 0.0116  | 0.0542 | 0.8302 | -0.0148 | 0.0135 | 0.2873 | 20.0281 | 0.5195 | 13.9965 |
| IschemicStroke | genus..Eubacteriumcoprostanoligenesgroup. id. 11375 | Simple mode               | 22 | 0.0165  | 0.1333 | 0.9025 | -0.0148 | 0.0135 | 0.2873 | 20.0281 | 0.5195 | 13.9965 |
| IschemicStroke | genus..Eubacteriumcoprostanoligenesgroup. id. 11375 | Weighted mode             | 22 | 0.0404  | 0.1095 | 0.7162 | -0.0148 | 0.0135 | 0.2873 | 20.0281 | 0.5195 | 13.9965 |
| IschemicStroke | genus..Eubacteriumeligensgroup. id. 14372           | MR Egger                  | 22 | -0.2407 | 0.2988 | 0.4300 | 0.0105  | 0.0160 | 0.5181 | 23.8727 | 0.2480 | 12.8055 |
| IschemicStroke | genus..Eubacteriumeligensgroup. id. 14372           | Weighted median           | 22 | -0.0941 | 0.0856 | 0.2713 | 0.0105  | 0.0160 | 0.5181 | 23.8727 | 0.2480 | 12.8055 |
| IschemicStroke | genus..Eubacteriumeligensgroup. id. 14372           | Inverse variance weighted | 22 | -0.0487 | 0.0634 | 0.4423 | 0.0105  | 0.0160 | 0.5181 | 23.8727 | 0.2480 | 12.8055 |
| IschemicStroke | genus..Eubacteriumeligensgroup. id. 14372           | Simple mode               | 22 | -0.0703 | 0.1480 | 0.6395 | 0.0105  | 0.0160 | 0.5181 | 23.8727 | 0.2480 | 12.8055 |
| IschemicStroke | genus..Eubacteriumeligensgroup. id. 14372           | Weighted mode             | 22 | -0.0895 | 0.1340 | 0.5115 | 0.0105  | 0.0160 | 0.5181 | 23.8727 | 0.2480 | 12.8055 |
| IschemicStroke | genus..Eubacteriumfissicatenagroup. id. 14373       | MR Egger                  | 22 | -0.2819 | 0.5385 | 0.6063 | 0.0203  | 0.0289 | 0.4905 | 16.8453 | 0.6630 | 4.5737  |
| IschemicStroke | genus..Eubacteriumfissicatenagroup. id. 14373       | Weighted median           | 22 | 0.1501  | 0.1567 | 0.3380 | 0.0203  | 0.0289 | 0.4905 | 16.8453 | 0.6630 | 4.5737  |
| IschemicStroke | genus..Eubacteriumfissicatenagroup. id. 14373       | Inverse variance weighted | 22 | 0.0875  | 0.1153 | 0.4477 | 0.0203  | 0.0289 | 0.4905 | 16.8453 | 0.6630 | 4.5737  |
| IschemicStroke | genus..Eubacteriumfissicatenagroup. id. 14373       | Simple mode               | 22 | 0.2274  | 0.3254 | 0.4922 | 0.0203  | 0.0289 | 0.4905 | 16.8453 | 0.6630 | 4.5737  |
| IschemicStroke | genus..Eubacteriumfissicatenagroup. id. 14373       | Weighted mode             | 22 | 0.0852  | 0.2604 | 0.7467 | 0.0203  | 0.0289 | 0.4905 | 16.8453 | 0.6630 | 4.5737  |
| IschemicStroke | genus..Eubacteriumhalliigroup. id. 11338            | MR Egger                  | 22 | 0.3288  | 0.2857 | 0.2634 | -0.0180 | 0.0153 | 0.2541 | 26.1859 | 0.1995 | 13.5695 |
| IschemicStroke | genus..Eubacteriumhalliigroup. id. 11338            | Weighted median           | 22 | 0.0204  | 0.0805 | 0.8001 | -0.0180 | 0.0153 | 0.2541 | 26.1859 | 0.1995 | 13.5695 |
| IschemicStroke | genus..Eubacteriumhalliigroup. id. 11338            | Inverse variance weighted | 22 | 0.0011  | 0.0620 | 0.9857 | -0.0180 | 0.0153 | 0.2541 | 26.1859 | 0.1995 | 13.5695 |
| IschemicStroke | genus..Eubacteriumhalliigroup. id. 11338            | Simple mode               | 22 | 0.0488  | 0.1391 | 0.7291 | -0.0180 | 0.0153 | 0.2541 | 26.1859 | 0.1995 | 13.5695 |
| IschemicStroke | genus..Eubacteriumhalliigroup. id. 11338            | Weighted mode             | 22 | 0.0712  | 0.1260 | 0.5779 | -0.0180 | 0.0153 | 0.2541 | 26.1859 | 0.1995 | 13.5695 |
| IschemicStroke | genus..Eubacteriumnodatumgroup. id. 11297           | MR Egger                  | 22 | 0.3959  | 0.5715 | 0.4964 | -0.0202 | 0.0307 | 0.5182 | 18.8789 | 0.5297 | 4.1193  |
| IschemicStroke | genus..Eubacteriumnodatumgroup. id. 11297           | Weighted median           | 22 | 0.0249  | 0.1756 | 0.8870 | -0.0202 | 0.0307 | 0.5182 | 18.8789 | 0.5297 | 4.1193  |
| IschemicStroke | genus..Eubacteriumnodatumgroup. id. 11297           | Inverse variance weighted | 22 | 0.0287  | 0.1224 | 0.8147 | -0.0202 | 0.0307 | 0.5182 | 18.8789 | 0.5297 | 4.1193  |
| IschemicStroke | genus..Eubacteriumnodatumgroup. id. 11297           | Simple mode               | 22 | 0.0168  | 0.3458 | 0.9618 | -0.0202 | 0.0307 | 0.5182 | 18.8789 | 0.5297 | 4.1193  |
| IschemicStroke | genus..Eubacteriumnodatumgroup. id. 11297           | Weighted mode             | 22 | -0.0289 | 0.3300 | 0.9311 | -0.0202 | 0.0307 | 0.5182 | 18.8789 | 0.5297 | 4.1193  |
| IschemicStroke | genus..Eubacteriumoxidoreducensgroup. id. 11339     | MR Egger                  | 22 | 0.8754  | 0.4569 | 0.0698 | -0.0520 | 0.0245 | 0.0462 | 24.0310 | 0.2916 | 6.1449  |
| IschemicStroke | genus..Eubacteriumoxidoreducensgroup. id. 11339     | Weighted median           | 22 | -0.0542 | 0.1434 | 0.7057 | -0.0520 | 0.0245 | 0.0462 | 24.0310 | 0.2916 | 6.1449  |
| IschemicStroke | genus..Eubacteriumoxidoreducensgroup. id. 11339     | Inverse variance weighted | 22 | -0.0731 | 0.1052 | 0.4871 | -0.0520 | 0.0245 | 0.0462 | 24.0310 | 0.2916 | 6.1449  |
| IschemicStroke | genus..Eubacteriumoxidoreducensgroup. id. 11339     | Simple mode               | 22 | -0.0180 | 0.2798 | 0.9493 | -0.0520 | 0.0245 | 0.0462 | 24.0310 | 0.2916 | 6.1449  |
| IschemicStroke | genus..Eubacteriumoxidoreducensgroup. id. 11339     | Weighted mode             | 22 | -0.0243 | 0.2670 | 0.9283 | -0.0520 | 0.0245 | 0.0462 | 24.0310 | 0.2916 | 6.1449  |
| IschemicStroke | genus..Eubacteriumrectalegroup. id. 14374           | MR Egger                  | 22 | 0.1528  | 0.2521 | 0.5512 | -0.0106 | 0.0135 | 0.4424 | 18.8550 | 0.5313 | 16.1259 |
| IschemicStroke | genus..Eubacteriumrectalegroup. id. 14374           | Weighted median           | 22 | -0.0307 | 0.0770 | 0.6896 | -0.0106 | 0.0135 | 0.4424 | 18.8550 | 0.5313 | 16.1259 |
| IschemicStroke | genus..Eubacteriumrectalegroup. id. 14374           | Inverse variance weighted | 22 | -0.0401 | 0.0542 | 0.4595 | -0.0106 | 0.0135 | 0.4424 | 18.8550 | 0.5313 | 16.1259 |
| IschemicStroke | genus..Eubacteriumrectalegroup. id. 14374           | Simple mode               | 22 | -0.0942 | 0.1445 | 0.5213 | -0.0106 | 0.0135 | 0.4424 | 18.8550 | 0.5313 | 16.1259 |
| IschemicStroke | genus..Eubacteriumrectalegroup. id. 14374           | Weighted mode             | 22 | -0.0978 | 0.1251 | 0.4430 | -0.0106 | 0.0135 | 0.4424 | 18.8550 | 0.5313 | 16.1259 |
| IschemicStroke | genus..Eubacteriumruminantiumgroup. id. 11340       | MR Egger                  | 22 | 0.1976  | 0.4784 | 0.6839 | -0.0127 | 0.0256 | 0.6254 | 31.7383 | 0.0462 | 5.4449  |
| IschemicStroke | genus..Eubacteriumruminantiumgroup. id. 11340       | Weighted median           | 22 | 0.0861  | 0.1208 | 0.4758 | -0.0127 | 0.0256 | 0.6254 | 31.7383 | 0.0462 | 5.4449  |
| IschemicStroke | genus..Eubacteriumruminantiumgroup. id. 11340       | Inverse variance weighted | 22 | -0.0341 | 0.1009 | 0.7356 | -0.0127 | 0.0256 | 0.6254 | 31.7383 | 0.0462 | 5.4449  |
| IschemicStroke | genus..Eubacteriumruminantiumgroup. id. 11340       | Simple mode               | 22 | 0.0946  | 0.1980 | 0.6378 | -0.0127 | 0.0256 | 0.6254 | 31.7383 | 0.0462 | 5.4449  |
| IschemicStroke | genus..Eubacteriumruminantiumgroup. id. 11340       | Weighted mode             | 22 | 0.0813  | 0.1854 | 0.6654 | -0.0127 | 0.0256 | 0.6254 | 31.7383 | 0.0462 | 5.4449  |
| IschemicStroke | genus..Eubacteriumventriosumgroup. id. 11341        | MR Egger                  | 22 | 0.1063  | 0.3461 | 0.7619 | -0.0051 | 0.0186 | 0.7854 | 33.2517 | 0.0317 | 9.8345  |
| IschemicStroke | genus..Eubacteriumventriosumgroup. id. 11341        | Weighted median           | 22 | -0.0872 | 0.0875 | 0.3194 | -0.0051 | 0.0186 | 0.7854 | 33.2517 | 0.0317 | 9.8345  |
| IschemicStroke | genus..Eubacteriumventriosumgroup. id. 11341        | Inverse variance weighted | 22 | 0.0130  | 0.0727 | 0.8577 | -0.0051 | 0.0186 | 0.7854 | 33.2517 | 0.0317 | 9.8345  |
| IschemicStroke | genus..Eubacteriumventriosumgroup. id. 11341        | Simple mode               | 22 | -0.1471 | 0.1808 | 0.4249 | -0.0051 | 0.0186 | 0.7854 | 33.2517 | 0.0317 | 9.8345  |
| IschemicStroke | genus..Eubacteriumventriosumgroup. id. 11341        | Weighted mode             | 22 | -0.1186 | 0.1357 | 0.3918 | -0.0051 | 0.0186 | 0.7854 | 33.2517 | 0.0317 | 9.8345  |
| IschemicStroke | genus..Eubacteriumxylanophilumgroup. id. 14375      | MR Egger                  | 22 | -0.3811 | 0.3182 | 0.2450 | 0.0184  | 0.0171 | 0.2944 | 26.1381 | 0.2012 | 10.3753 |
| IschemicStroke | genus..Eubacteriumxylanophilumgroup. id. 14375      | Weighted median           | 22 | -0.0326 | 0.0907 | 0.7191 | 0.0184  | 0.0171 | 0.2944 | 26.1381 | 0.2012 | 10.3753 |
| IschemicStroke | genus..Eubacteriumxylanophilumgroup. id. 14375      | Inverse variance weighted | 22 | -0.0465 | 0.0686 | 0.4984 | 0.0184  | 0.0171 | 0.2944 | 26.1381 | 0.2012 | 10.3753 |
| IschemicStroke | genus..Eubacteriumxylanophilumgroup. id. 14375      | Simple mode               | 22 | 0.0172  | 0.1764 | 0.9231 | 0.0184  | 0.0171 | 0.2944 | 26.1381 | 0.2012 | 10.3753 |
| IschemicStroke | genus..Eubacteriumxylanophilumgroup. id. 14375      | Weighted mode             | 22 | 0.0339  | 0.1765 | 0.8495 | 0.0184  | 0.0171 | 0.2944 | 26.1381 | 0.2012 | 10.3753 |
| IschemicStroke | genus..Ruminococcusgavureauiigroup. id. 11342       | MR Egger                  | 22 | -0.3454 | 0.3247 | 0.3002 | 0.0168  | 0.0174 | 0.3472 | 26.7786 | 0.1783 | 11.7276 |
| IschemicStroke | genus..Ruminococcusgavureauiigroup. id. 11342       | Weighted median           | 22 | -0.1284 | 0.0950 | 0.1764 | 0.0168  | 0.0174 | 0.3472 | 26.7786 | 0.1783 | 11.7276 |
| IschemicStroke | genus..Ruminococcusgavureauiigroup. id. 11342       | Inverse variance weighted | 22 | -0.0401 | 0.0696 | 0.5645 | 0.0168  | 0.0174 | 0.3472 | 26.7786 | 0.1783 | 11.7276 |
| IschemicStroke | genus..Ruminococcusgavureauiigroup. id. 11342       | Simple mode               | 22 | -0.2572 | 0.2129 | 0.2406 | 0.0168  | 0.0174 | 0.3472 | 26.7786 | 0.1783 | 11.7276 |
| IschemicStroke | genus..Ruminococcusgavureauiigroup. id. 11342       | Weighted mode             | 22 | -0.2445 | 0.1878 | 0.2070 | 0.0168  | 0.0174 | 0.3472 | 26.7786 | 0.1783 | 11.7276 |
| IschemicStroke | genus..Ruminococcusgnavusgroup. id. 14376           | MR Egger                  | 22 | -0.1976 | 0.4536 | 0.6678 | 0.0154  | 0.0243 | 0.5340 | 23.7493 | 0.2535 | 6.6764  |
| IschemicStroke | genus..Ruminococcusgnavusgroup. id. 14376           | Weighted median           | 22 | 0.1059  | 0.1277 | 0.4070 | 0.0154  | 0.0243 | 0.5340 | 23.7493 | 0.2535 | 6.6764  |
| IschemicStroke | genus..Ruminococcusgnavusgroup. id. 14376           | Inverse variance weighted | 22 | 0.0828  | 0.0961 | 0.3892 | 0.0154  | 0.0243 | 0.5340 | 23.7493 | 0.2535 | 6.6764  |
| IschemicStroke | genus..Ruminococcusgnavusgroup. id. 14376           | Simple mode               | 22 | 0.1196  | 0.2358 | 0.6172 | 0.0154  | 0.0243 | 0.5340 | 23.7493 | 0.2535 | 6.6764  |

|                |                                              |                           |    |         |        |        |         |        |        |         |        |         |
|----------------|----------------------------------------------|---------------------------|----|---------|--------|--------|---------|--------|--------|---------|--------|---------|
| IschemicStroke | genus. . Ruminococcusnavusgroup. id. 14376   | Weighted mode             | 22 | 0.0537  | 0.2145 | 0.8046 | 0.0154  | 0.0243 | 0.5340 | 23.7493 | 0.2535 | 6.6764  |
| IschemicStroke | genus. . Ruminococcustorquesgroup. id. 14377 | MR Egger                  | 22 | 0.2838  | 0.3313 | 0.4018 | -0.0196 | 0.0178 | 0.2822 | 37.5510 | 0.0145 | 12.1146 |
| IschemicStroke | genus. . Ruminococcustorquesgroup. id. 14377 | Weighted median           | 22 | -0.0163 | 0.0723 | 0.8222 | -0.0196 | 0.0178 | 0.2822 | 37.5510 | 0.0145 | 12.1146 |
| IschemicStroke | genus. . Ruminococcustorquesgroup. id. 14377 | Inverse variance weighted | 22 | -0.0737 | 0.0716 | 0.3031 | -0.0196 | 0.0178 | 0.2822 | 37.5510 | 0.0145 | 12.1146 |
| IschemicStroke | genus. . Ruminococcustorquesgroup. id. 14377 | Simple mode               | 22 | 0.0486  | 0.1149 | 0.6766 | -0.0196 | 0.0178 | 0.2822 | 37.5510 | 0.0145 | 12.1146 |
| IschemicStroke | genus. . Ruminococcustorquesgroup. id. 14377 | Weighted mode             | 22 | 0.0299  | 0.1162 | 0.7992 | -0.0196 | 0.0178 | 0.2822 | 37.5510 | 0.0145 | 12.1146 |
| IschemicStroke | genus. Actinomyces. id. 423                  | MR Egger                  | 22 | -0.0066 | 0.3955 | 0.9868 | -0.0067 | 0.0212 | 0.7554 | 21.5407 | 0.3659 | 6.8394  |
| IschemicStroke | genus. Actinomyces. id. 423                  | Weighted median           | 22 | -0.1150 | 0.1138 | 0.3124 | -0.0067 | 0.0212 | 0.7554 | 21.5407 | 0.3659 | 6.8394  |
| IschemicStroke | genus. Actinomyces. id. 423                  | Inverse variance weighted | 22 | -0.1286 | 0.0830 | 0.1214 | -0.0067 | 0.0212 | 0.7554 | 21.5407 | 0.3659 | 6.8394  |
| IschemicStroke | genus. Actinomyces. id. 423                  | Simple mode               | 22 | -0.2066 | 0.2045 | 0.3238 | -0.0067 | 0.0212 | 0.7554 | 21.5407 | 0.3659 | 6.8394  |
| IschemicStroke | genus. Actinomyces. id. 423                  | Weighted mode             | 22 | -0.1451 | 0.1891 | 0.4513 | -0.0067 | 0.0212 | 0.7554 | 21.5407 | 0.3659 | 6.8394  |
| IschemicStroke | genus. Adlercreutzia. id. 812                | MR Egger                  | 22 | 0.0647  | 0.3623 | 0.8602 | -0.0066 | 0.0194 | 0.7376 | 17.9320 | 0.5919 | 9.1991  |
| IschemicStroke | genus. Adlercreutzia. id. 812                | Weighted median           | 22 | -0.0884 | 0.1055 | 0.4019 | -0.0066 | 0.0194 | 0.7376 | 17.9320 | 0.5919 | 9.1991  |
| IschemicStroke | genus. Adlercreutzia. id. 812                | Inverse variance weighted | 22 | -0.0556 | 0.0778 | 0.4750 | -0.0066 | 0.0194 | 0.7376 | 17.9320 | 0.5919 | 9.1991  |
| IschemicStroke | genus. Adlercreutzia. id. 812                | Simple mode               | 22 | -0.1333 | 0.1879 | 0.4858 | -0.0066 | 0.0194 | 0.7376 | 17.9320 | 0.5919 | 9.1991  |
| IschemicStroke | genus. Adlercreutzia. id. 812                | Weighted mode             | 22 | -0.1143 | 0.1772 | 0.5259 | -0.0066 | 0.0194 | 0.7376 | 17.9320 | 0.5919 | 9.1991  |
| IschemicStroke | genus. Akkermansia. id. 4037                 | MR Egger                  | 22 | 0.2275  | 0.3032 | 0.4618 | -0.0138 | 0.0163 | 0.4057 | 17.1422 | 0.6437 | 13.2371 |
| IschemicStroke | genus. Akkermansia. id. 4037                 | Weighted median           | 22 | 0.0028  | 0.0896 | 0.9753 | -0.0138 | 0.0163 | 0.4057 | 17.1422 | 0.6437 | 13.2371 |
| IschemicStroke | genus. Akkermansia. id. 4037                 | Inverse variance weighted | 22 | -0.0240 | 0.0652 | 0.7122 | -0.0138 | 0.0163 | 0.4057 | 17.1422 | 0.6437 | 13.2371 |
| IschemicStroke | genus. Akkermansia. id. 4037                 | Simple mode               | 22 | -0.0226 | 0.1777 | 0.9000 | -0.0138 | 0.0163 | 0.4057 | 17.1422 | 0.6437 | 13.2371 |
| IschemicStroke | genus. Akkermansia. id. 4037                 | Weighted mode             | 22 | -0.0146 | 0.1630 | 0.9294 | -0.0138 | 0.0163 | 0.4057 | 17.1422 | 0.6437 | 13.2371 |
| IschemicStroke | genus. Alistipes. id. 968                    | MR Egger                  | 22 | 0.0034  | 0.2976 | 0.9911 | -0.0014 | 0.0160 | 0.9293 | 28.2065 | 0.1046 | 10.4147 |
| IschemicStroke | genus. Alistipes. id. 968                    | Weighted median           | 22 | -0.0188 | 0.0787 | 0.8116 | -0.0014 | 0.0160 | 0.9293 | 28.2065 | 0.1046 | 10.4147 |
| IschemicStroke | genus. Alistipes. id. 968                    | Inverse variance weighted | 22 | -0.0227 | 0.0624 | 0.7157 | -0.0014 | 0.0160 | 0.9293 | 28.2065 | 0.1046 | 10.4147 |
| IschemicStroke | genus. Alistipes. id. 968                    | Simple mode               | 22 | 0.0306  | 0.1378 | 0.8262 | -0.0014 | 0.0160 | 0.9293 | 28.2065 | 0.1046 | 10.4147 |
| IschemicStroke | genus. Alistipes. id. 968                    | Weighted mode             | 22 | 0.0070  | 0.1292 | 0.9576 | -0.0014 | 0.0160 | 0.9293 | 28.2065 | 0.1046 | 10.4147 |
| IschemicStroke | genus. Allisonella. id. 2174                 | MR Egger                  | 14 | -0.0481 | 0.7600 | 0.9505 | 0.0009  | 0.0385 | 0.9816 | 9.3641  | 0.6716 | 4.2085  |
| IschemicStroke | genus. Allisonella. id. 2174                 | Weighted median           | 14 | 0.1028  | 0.2112 | 0.6263 | 0.0009  | 0.0385 | 0.9816 | 9.3641  | 0.6716 | 4.2085  |
| IschemicStroke | genus. Allisonella. id. 2174                 | Inverse variance weighted | 14 | -0.0306 | 0.1549 | 0.8433 | 0.0009  | 0.0385 | 0.9816 | 9.3641  | 0.6716 | 4.2085  |
| IschemicStroke | genus. Allisonella. id. 2174                 | Simple mode               | 14 | 0.1735  | 0.3339 | 0.6120 | 0.0009  | 0.0385 | 0.9816 | 9.3641  | 0.6716 | 4.2085  |
| IschemicStroke | genus. Allisonella. id. 2174                 | Weighted mode             | 14 | 0.1234  | 0.3037 | 0.6911 | 0.0009  | 0.0385 | 0.9816 | 9.3641  | 0.6716 | 4.2085  |
| IschemicStroke | genus. Alloprevotella. id. 961               | MR Egger                  | 9  | 1.4521  | 0.9736 | 0.1794 | -0.0909 | 0.0530 | 0.1300 | 8.7476  | 0.3640 | 2.8422  |
| IschemicStroke | genus. Alloprevotella. id. 961               | Weighted median           | 9  | -0.1657 | 0.2446 | 0.4982 | -0.0909 | 0.0530 | 0.1300 | 8.7476  | 0.3640 | 2.8422  |
| IschemicStroke | genus. Alloprevotella. id. 961               | Inverse variance weighted | 9  | -0.1877 | 0.1929 | 0.3306 | -0.0909 | 0.0530 | 0.1300 | 8.7476  | 0.3640 | 2.8422  |
| IschemicStroke | genus. Alloprevotella. id. 961               | Simple mode               | 9  | -0.1926 | 0.3931 | 0.6374 | -0.0909 | 0.0530 | 0.1300 | 8.7476  | 0.3640 | 2.8422  |
| IschemicStroke | genus. Alloprevotella. id. 961               | Weighted mode             | 9  | -0.0646 | 0.3397 | 0.8539 | -0.0909 | 0.0530 | 0.1300 | 8.7476  | 0.3640 | 2.8422  |
| IschemicStroke | genus. Anaerofilum. id. 2053                 | MR Egger                  | 22 | -0.3178 | 0.4636 | 0.5010 | 0.0156  | 0.0249 | 0.5386 | 15.0839 | 0.7716 | 8.1208  |
| IschemicStroke | genus. Anaerofilum. id. 2053                 | Weighted median           | 22 | -0.1141 | 0.1367 | 0.4040 | 0.0156  | 0.0249 | 0.5386 | 15.0839 | 0.7716 | 8.1208  |
| IschemicStroke | genus. Anaerofilum. id. 2053                 | Inverse variance weighted | 22 | -0.0345 | 0.0995 | 0.7291 | 0.0156  | 0.0249 | 0.5386 | 15.0839 | 0.7716 | 8.1208  |
| IschemicStroke | genus. Anaerofilum. id. 2053                 | Simple mode               | 22 | -0.0946 | 0.2531 | 0.7122 | 0.0156  | 0.0249 | 0.5386 | 15.0839 | 0.7716 | 8.1208  |
| IschemicStroke | genus. Anaerofilum. id. 2053                 | Weighted mode             | 22 | -0.1586 | 0.2345 | 0.5060 | 0.0156  | 0.0249 | 0.5386 | 15.0839 | 0.7716 | 8.1208  |
| IschemicStroke | genus. Anaerostipes. id. 1991                | MR Egger                  | 22 | -0.1651 | 0.2556 | 0.5256 | 0.0074  | 0.0137 | 0.5976 | 13.1605 | 0.8704 | 17.7808 |
| IschemicStroke | genus. Anaerostipes. id. 1991                | Weighted median           | 22 | -0.0972 | 0.0751 | 0.1953 | 0.0074  | 0.0137 | 0.5976 | 13.1605 | 0.8704 | 17.7808 |
| IschemicStroke | genus. Anaerostipes. id. 1991                | Inverse variance weighted | 22 | -0.0312 | 0.0549 | 0.5698 | 0.0074  | 0.0137 | 0.5976 | 13.1605 | 0.8704 | 17.7808 |
| IschemicStroke | genus. Anaerostipes. id. 1991                | Simple mode               | 22 | -0.1463 | 0.1318 | 0.2794 | 0.0074  | 0.0137 | 0.5976 | 13.1605 | 0.8704 | 17.7808 |
| IschemicStroke | genus. Anaerostipes. id. 1991                | Weighted mode             | 22 | -0.1227 | 0.1139 | 0.2938 | 0.0074  | 0.0137 | 0.5976 | 13.1605 | 0.8704 | 17.7808 |
| IschemicStroke | genus. Anaerotruncus. id. 2054               | MR Egger                  | 22 | -0.4018 | 0.2578 | 0.1348 | 0.0197  | 0.0138 | 0.1688 | 19.7126 | 0.5395 | 16.4649 |
| IschemicStroke | genus. Anaerotruncus. id. 2054               | Weighted median           | 22 | -0.0951 | 0.0801 | 0.2350 | 0.0197  | 0.0138 | 0.1688 | 19.7126 | 0.5395 | 16.4649 |
| IschemicStroke | genus. Anaerotruncus. id. 2054               | Inverse variance weighted | 22 | -0.0423 | 0.0554 | 0.4447 | 0.0197  | 0.0138 | 0.1688 | 19.7126 | 0.5395 | 16.4649 |
| IschemicStroke | genus. Anaerotruncus. id. 2054               | Simple mode               | 22 | -0.1220 | 0.1392 | 0.3907 | 0.0197  | 0.0138 | 0.1688 | 19.7126 | 0.5395 | 16.4649 |
| IschemicStroke | genus. Anaerotruncus. id. 2054               | Weighted mode             | 22 | -0.1052 | 0.1208 | 0.3934 | 0.0197  | 0.0138 | 0.1688 | 19.7126 | 0.5395 | 16.4649 |
| IschemicStroke | genus. Bacteroides. id. 918                  | MR Egger                  | 22 | 0.0505  | 0.3050 | 0.8702 | -0.0018 | 0.0164 | 0.9125 | 30.8054 | 0.0578 | 11.9730 |
| IschemicStroke | genus. Bacteroides. id. 918                  | Weighted median           | 22 | 0.0341  | 0.0761 | 0.6547 | -0.0018 | 0.0164 | 0.9125 | 30.8054 | 0.0578 | 11.9730 |
| IschemicStroke | genus. Bacteroides. id. 918                  | Inverse variance weighted | 22 | 0.0173  | 0.0640 | 0.7865 | -0.0018 | 0.0164 | 0.9125 | 30.8054 | 0.0578 | 11.9730 |
| IschemicStroke | genus. Bacteroides. id. 918                  | Simple mode               | 22 | 0.0990  | 0.1589 | 0.5400 | -0.0018 | 0.0164 | 0.9125 | 30.8054 | 0.0578 | 11.9730 |
| IschemicStroke | genus. Bacteroides. id. 918                  | Weighted mode             | 22 | 0.0772  | 0.1547 | 0.6229 | -0.0018 | 0.0164 | 0.9125 | 30.8054 | 0.0578 | 11.9730 |
| IschemicStroke | genus. Barnesiella. id. 944                  | MR Egger                  | 22 | 0.0148  | 0.3513 | 0.9667 | 0.0062  | 0.0188 | 0.7472 | 32.0307 | 0.0430 | 8.3766  |
| IschemicStroke | genus. Barnesiella. id. 944                  | Weighted median           | 22 | 0.0654  | 0.0914 | 0.4743 | 0.0062  | 0.0188 | 0.7472 | 32.0307 | 0.0430 | 8.3766  |

|                |                                                        |                           |    |         |        |        |         |        |        |         |        |         |
|----------------|--------------------------------------------------------|---------------------------|----|---------|--------|--------|---------|--------|--------|---------|--------|---------|
| IschemicStroke | genus. <i>Barnesiella</i> . id. 944                    | Inverse variance weighted | 22 | 0.1270  | 0.0739 | 0.0857 | 0.0062  | 0.0188 | 0.7472 | 32.0307 | 0.0430 | 8.3766  |
| IschemicStroke | genus. <i>Barnesiella</i> . id. 944                    | Simple mode               | 22 | 0.0481  | 0.1930 | 0.8056 | 0.0062  | 0.0188 | 0.7472 | 32.0307 | 0.0430 | 8.3766  |
| IschemicStroke | genus. <i>Barnesiella</i> . id. 944                    | Weighted mode             | 22 | -0.0276 | 0.1757 | 0.8768 | 0.0062  | 0.0188 | 0.7472 | 32.0307 | 0.0430 | 8.3766  |
| IschemicStroke | genus. <i>Bifidobacterium</i> . id. 436                | MR Egger                  | 22 | 0.1727  | 0.3355 | 0.6125 | -0.0089 | 0.0180 | 0.6254 | 30.1317 | 0.0677 | 8.2004  |
| IschemicStroke | genus. <i>Bifidobacterium</i> . id. 436                | Weighted median           | 22 | 0.0517  | 0.0824 | 0.5303 | -0.0089 | 0.0180 | 0.6254 | 30.1317 | 0.0677 | 8.2004  |
| IschemicStroke | genus. <i>Bifidobacterium</i> . id. 436                | Inverse variance weighted | 22 | 0.0102  | 0.0709 | 0.8858 | -0.0089 | 0.0180 | 0.6254 | 30.1317 | 0.0677 | 8.2004  |
| IschemicStroke | genus. <i>Bifidobacterium</i> . id. 436                | Simple mode               | 22 | 0.1033  | 0.1315 | 0.4410 | -0.0089 | 0.0180 | 0.6254 | 30.1317 | 0.0677 | 8.2004  |
| IschemicStroke | genus. <i>Bifidobacterium</i> . id. 436                | Weighted mode             | 22 | 0.0990  | 0.1241 | 0.4341 | -0.0089 | 0.0180 | 0.6254 | 30.1317 | 0.0677 | 8.2004  |
| IschemicStroke | genus. <i>Bilophila</i> . id. 3170                     | MR Egger                  | 22 | 0.1557  | 0.3080 | 0.6187 | -0.0058 | 0.0165 | 0.7306 | 22.1355 | 0.3332 | 13.4823 |
| IschemicStroke | genus. <i>Bilophila</i> . id. 3170                     | Weighted median           | 22 | 0.0718  | 0.0942 | 0.4461 | -0.0058 | 0.0165 | 0.7306 | 22.1355 | 0.3332 | 13.4823 |
| IschemicStroke | genus. <i>Bilophila</i> . id. 3170                     | Inverse variance weighted | 22 | 0.0507  | 0.0649 | 0.4347 | -0.0058 | 0.0165 | 0.7306 | 22.1355 | 0.3332 | 13.4823 |
| IschemicStroke | genus. <i>Bilophila</i> . id. 3170                     | Simple mode               | 22 | 0.1062  | 0.1854 | 0.5730 | -0.0058 | 0.0165 | 0.7306 | 22.1355 | 0.3332 | 13.4823 |
| IschemicStroke | genus. <i>Bilophila</i> . id. 3170                     | Weighted mode             | 22 | 0.0939  | 0.1946 | 0.6345 | -0.0058 | 0.0165 | 0.7306 | 22.1355 | 0.3332 | 13.4823 |
| IschemicStroke | genus. <i>Blautia</i> . id. 1992                       | MR Egger                  | 22 | -0.3208 | 0.2600 | 0.2317 | 0.0165  | 0.0139 | 0.2501 | 23.9352 | 0.2962 | 15.1098 |
| IschemicStroke | genus. <i>Blautia</i> . id. 1992                       | Weighted median           | 22 | -0.1170 | 0.0782 | 0.1344 | 0.0165  | 0.0139 | 0.2501 | 23.9352 | 0.2962 | 15.1098 |
| IschemicStroke | genus. <i>Blautia</i> . id. 1992                       | Inverse variance weighted | 22 | -0.0200 | 0.0565 | 0.7232 | 0.0165  | 0.0139 | 0.2501 | 23.9352 | 0.2962 | 15.1098 |
| IschemicStroke | genus. <i>Blautia</i> . id. 1992                       | Simple mode               | 22 | -0.1710 | 0.1618 | 0.3026 | 0.0165  | 0.0139 | 0.2501 | 23.9352 | 0.2962 | 15.1098 |
| IschemicStroke | genus. <i>Blautia</i> . id. 1992                       | Weighted mode             | 22 | -0.1510 | 0.1416 | 0.2986 | 0.0165  | 0.0139 | 0.2501 | 23.9352 | 0.2962 | 15.1098 |
| IschemicStroke | genus. <i>Butyricicoccus</i> . id. 2055                | MR Egger                  | 22 | 0.0903  | 0.2898 | 0.7586 | -0.0092 | 0.0155 | 0.5606 | 26.1396 | 0.1612 | 11.6248 |
| IschemicStroke | genus. <i>Butyricicoccus</i> . id. 2055                | Weighted median           | 22 | -0.0406 | 0.0825 | 0.6226 | -0.0092 | 0.0155 | 0.5606 | 26.1396 | 0.1612 | 11.6248 |
| IschemicStroke | genus. <i>Butyricicoccus</i> . id. 2055                | Inverse variance weighted | 22 | -0.0772 | 0.0613 | 0.2081 | -0.0092 | 0.0155 | 0.5606 | 26.1396 | 0.1612 | 11.6248 |
| IschemicStroke | genus. <i>Butyricicoccus</i> . id. 2055                | Simple mode               | 22 | -0.0070 | 0.1600 | 0.9655 | -0.0092 | 0.0155 | 0.5606 | 26.1396 | 0.1612 | 11.6248 |
| IschemicStroke | genus. <i>Butyricicoccus</i> . id. 2055                | Weighted mode             | 22 | -0.0308 | 0.1289 | 0.8136 | -0.0092 | 0.0155 | 0.5606 | 26.1396 | 0.1612 | 11.6248 |
| IschemicStroke | genus. <i>Butyricimonas</i> . id. 945                  | MR Egger                  | 22 | 0.0485  | 0.3201 | 0.8810 | 0.0002  | 0.0172 | 0.9898 | 19.5806 | 0.4844 | 11.3944 |
| IschemicStroke | genus. <i>Butyricimonas</i> . id. 945                  | Weighted median           | 22 | 0.0457  | 0.0936 | 0.6252 | 0.0002  | 0.0172 | 0.9898 | 19.5806 | 0.4844 | 11.3944 |
| IschemicStroke | genus. <i>Butyricimonas</i> . id. 945                  | Inverse variance weighted | 22 | 0.0526  | 0.0688 | 0.4446 | 0.0002  | 0.0172 | 0.9898 | 19.5806 | 0.4844 | 11.3944 |
| IschemicStroke | genus. <i>Butyricimonas</i> . id. 945                  | Simple mode               | 22 | 0.0090  | 0.1815 | 0.9610 | 0.0002  | 0.0172 | 0.9898 | 19.5806 | 0.4844 | 11.3944 |
| IschemicStroke | genus. <i>Butyricimonas</i> . id. 945                  | Weighted mode             | 22 | 0.0747  | 0.1555 | 0.6357 | 0.0002  | 0.0172 | 0.9898 | 19.5806 | 0.4844 | 11.3944 |
| IschemicStroke | genus. <i>Butyrivibrio</i> . id. 1993                  | MR Egger                  | 22 | 0.5275  | 0.5713 | 0.3668 | -0.0196 | 0.0307 | 0.5292 | 20.9916 | 0.3976 | 3.6080  |
| IschemicStroke | genus. <i>Butyrivibrio</i> . id. 1993                  | Weighted median           | 22 | 0.1466  | 0.1672 | 0.3806 | -0.0196 | 0.0307 | 0.5292 | 20.9916 | 0.3976 | 3.6080  |
| IschemicStroke | genus. <i>Butyrivibrio</i> . id. 1993                  | Inverse variance weighted | 22 | 0.1701  | 0.1207 | 0.1586 | -0.0196 | 0.0307 | 0.5292 | 20.9916 | 0.3976 | 3.6080  |
| IschemicStroke | genus. <i>Butyrivibrio</i> . id. 1993                  | Simple mode               | 22 | 0.1672  | 0.3298 | 0.6176 | -0.0196 | 0.0307 | 0.5292 | 20.9916 | 0.3976 | 3.6080  |
| IschemicStroke | genus. <i>Butyrivibrio</i> . id. 1993                  | Weighted mode             | 22 | 0.1672  | 0.2967 | 0.5791 | -0.0196 | 0.0307 | 0.5292 | 20.9916 | 0.3976 | 3.6080  |
| IschemicStroke | genus. <i>CandidatusSoleaferrea</i> . id. 11350        | MR Egger                  | 22 | 0.0878  | 0.4222 | 0.8374 | -0.0050 | 0.0226 | 0.8266 | 15.9421 | 0.7202 | 8.3461  |
| IschemicStroke | genus. <i>CandidatusSoleaferrea</i> . id. 11350        | Weighted median           | 22 | -0.0944 | 0.1269 | 0.4566 | -0.0050 | 0.0226 | 0.8266 | 15.9421 | 0.7202 | 8.3461  |
| IschemicStroke | genus. <i>CandidatusSoleaferrea</i> . id. 11350        | Inverse variance weighted | 22 | -0.0037 | 0.0905 | 0.9670 | -0.0050 | 0.0226 | 0.8266 | 15.9421 | 0.7202 | 8.3461  |
| IschemicStroke | genus. <i>CandidatusSoleaferrea</i> . id. 11350        | Simple mode               | 22 | -0.1548 | 0.2523 | 0.5461 | -0.0050 | 0.0226 | 0.8266 | 15.9421 | 0.7202 | 8.3461  |
| IschemicStroke | genus. <i>CandidatusSoleaferrea</i> . id. 11350        | Weighted mode             | 22 | -0.1347 | 0.2162 | 0.5398 | -0.0050 | 0.0226 | 0.8266 | 15.9421 | 0.7202 | 8.3461  |
| IschemicStroke | genus. <i>Catenibacterium</i> . id. 2153               | MR Egger                  | 14 | 0.9683  | 0.7577 | 0.2254 | -0.0439 | 0.0384 | 0.2756 | 12.2884 | 0.5041 | 3.6756  |
| IschemicStroke | genus. <i>Catenibacterium</i> . id. 2153               | Weighted median           | 14 | 0.1123  | 0.2169 | 0.6045 | -0.0439 | 0.0384 | 0.2756 | 12.2884 | 0.5041 | 3.6756  |
| IschemicStroke | genus. <i>Catenibacterium</i> . id. 2153               | Inverse variance weighted | 14 | 0.1210  | 0.1546 | 0.4339 | -0.0439 | 0.0384 | 0.2756 | 12.2884 | 0.5041 | 3.6756  |
| IschemicStroke | genus. <i>Catenibacterium</i> . id. 2153               | Simple mode               | 14 | -0.1918 | 0.4394 | 0.6697 | -0.0439 | 0.0384 | 0.2756 | 12.2884 | 0.5041 | 3.6756  |
| IschemicStroke | genus. <i>Catenibacterium</i> . id. 2153               | Weighted mode             | 14 | 0.5957  | 0.4209 | 0.1804 | -0.0439 | 0.0384 | 0.2756 | 12.2884 | 0.5041 | 3.6756  |
| IschemicStroke | genus. <i>Christensenellaceae</i> R. 7group. id. 11283 | MR Egger                  | 22 | -0.3341 | 0.2629 | 0.2184 | 0.0179  | 0.0141 | 0.2183 | 22.1773 | 0.3894 | 15.0286 |
| IschemicStroke | genus. <i>Christensenellaceae</i> R. 7group. id. 11283 | Weighted median           | 22 | -0.0789 | 0.0727 | 0.2773 | 0.0179  | 0.0141 | 0.2183 | 22.1773 | 0.3894 | 15.0286 |
| IschemicStroke | genus. <i>Christensenellaceae</i> R. 7group. id. 11283 | Inverse variance weighted | 22 | -0.0077 | 0.0573 | 0.8927 | 0.0179  | 0.0141 | 0.2183 | 22.1773 | 0.3894 | 15.0286 |
| IschemicStroke | genus. <i>Christensenellaceae</i> R. 7group. id. 11283 | Simple mode               | 22 | -0.1097 | 0.1559 | 0.4891 | 0.0179  | 0.0141 | 0.2183 | 22.1773 | 0.3894 | 15.0286 |
| IschemicStroke | genus. <i>Christensenellaceae</i> R. 7group. id. 11283 | Weighted mode             | 22 | -0.1097 | 0.1398 | 0.4413 | 0.0179  | 0.0141 | 0.2183 | 22.1773 | 0.3894 | 15.0286 |
| IschemicStroke | genus. <i>Clostridiumsensustrictol</i> . id. 1873      | MR Egger                  | 22 | -0.1029 | 0.4073 | 0.8031 | 0.0033  | 0.0218 | 0.8817 | 42.4928 | 0.0024 | 8.7731  |
| IschemicStroke | genus. <i>Clostridiumsensustrictol</i> . id. 1873      | Weighted median           | 22 | 0.0381  | 0.0940 | 0.6852 | 0.0033  | 0.0218 | 0.8817 | 42.4928 | 0.0024 | 8.7731  |
| IschemicStroke | genus. <i>Clostridiumsensustrictol</i> . id. 1873      | Inverse variance weighted | 22 | -0.0429 | 0.0855 | 0.6155 | 0.0033  | 0.0218 | 0.8817 | 42.4928 | 0.0024 | 8.7731  |
| IschemicStroke | genus. <i>Clostridiumsensustrictol</i> . id. 1873      | Simple mode               | 22 | 0.1241  | 0.1997 | 0.5412 | 0.0033  | 0.0218 | 0.8817 | 42.4928 | 0.0024 | 8.7731  |
| IschemicStroke | genus. <i>Clostridiumsensustrictol</i> . id. 1873      | Weighted mode             | 22 | 0.0831  | 0.1980 | 0.6788 | 0.0033  | 0.0218 | 0.8817 | 42.4928 | 0.0024 | 8.7731  |
| IschemicStroke | genus. <i>Collinsella</i> . id. 815                    | MR Egger                  | 22 | 0.3941  | 0.3983 | 0.3342 | -0.0202 | 0.0214 | 0.3563 | 43.4399 | 0.0028 | 8.6571  |
| IschemicStroke | genus. <i>Collinsella</i> . id. 815                    | Weighted median           | 22 | -0.0428 | 0.0861 | 0.6195 | -0.0202 | 0.0214 | 0.3563 | 43.4399 | 0.0028 | 8.6571  |
| IschemicStroke | genus. <i>Collinsella</i> . id. 815                    | Inverse variance weighted | 22 | 0.0268  | 0.0855 | 0.7536 | -0.0202 | 0.0214 | 0.3563 | 43.4399 | 0.0028 | 8.6571  |
| IschemicStroke | genus. <i>Collinsella</i> . id. 815                    | Simple mode               | 22 | -0.0573 | 0.1285 | 0.6604 | -0.0202 | 0.0214 | 0.3563 | 43.4399 | 0.0028 | 8.6571  |
| IschemicStroke | genus. <i>Collinsella</i> . id. 815                    | Weighted mode             | 22 | -0.0573 | 0.1052 | 0.5919 | -0.0202 | 0.0214 | 0.3563 | 43.4399 | 0.0028 | 8.6571  |

|                |                                           |                           |    |         |        |        |         |        |        |         |        |         |
|----------------|-------------------------------------------|---------------------------|----|---------|--------|--------|---------|--------|--------|---------|--------|---------|
| IschemicStroke | genus. Coprobacter. id. 949               | MR Egger                  | 22 | 0.0533  | 0.4019 | 0.8958 | -0.0076 | 0.0216 | 0.7273 | 19.5431 | 0.4868 | 8.1659  |
| IschemicStroke | genus. Coprobacter. id. 949               | Weighted median           | 22 | -0.0232 | 0.1267 | 0.8546 | -0.0076 | 0.0216 | 0.7273 | 19.5431 | 0.4868 | 8.1659  |
| IschemicStroke | genus. Coprobacter. id. 949               | Inverse variance weighted | 22 | -0.0855 | 0.0862 | 0.3212 | -0.0076 | 0.0216 | 0.7273 | 19.5431 | 0.4868 | 8.1659  |
| IschemicStroke | genus. Coprobacter. id. 949               | Simple mode               | 22 | 0.1784  | 0.2357 | 0.4577 | -0.0076 | 0.0216 | 0.7273 | 19.5431 | 0.4868 | 8.1659  |
| IschemicStroke | genus. Coprobacter. id. 949               | Weighted mode             | 22 | 0.1571  | 0.2296 | 0.5013 | -0.0076 | 0.0216 | 0.7273 | 19.5431 | 0.4868 | 8.1659  |
| IschemicStroke | genus. Coprococcus1. id. 11301            | MR Egger                  | 22 | -0.2208 | 0.2956 | 0.4638 | 0.0137  | 0.0159 | 0.3982 | 26.5569 | 0.1482 | 11.4993 |
| IschemicStroke | genus. Coprococcus1. id. 11301            | Weighted median           | 22 | 0.0858  | 0.0776 | 0.2688 | 0.0137  | 0.0159 | 0.3982 | 26.5569 | 0.1482 | 11.4993 |
| IschemicStroke | genus. Coprococcus1. id. 11301            | Inverse variance weighted | 22 | -0.0284 | 0.0632 | 0.6525 | 0.0137  | 0.0159 | 0.3982 | 26.5569 | 0.1482 | 11.4993 |
| IschemicStroke | genus. Coprococcus1. id. 11301            | Simple mode               | 22 | 0.0587  | 0.1357 | 0.6697 | 0.0137  | 0.0159 | 0.3982 | 26.5569 | 0.1482 | 11.4993 |
| IschemicStroke | genus. Coprococcus1. id. 11301            | Weighted mode             | 22 | 0.0860  | 0.1161 | 0.4668 | 0.0137  | 0.0159 | 0.3982 | 26.5569 | 0.1482 | 11.4993 |
| IschemicStroke | genus. Coprococcus2. id. 11302            | MR Egger                  | 22 | 0.0821  | 0.3099 | 0.7938 | -0.0035 | 0.0166 | 0.8334 | 18.7493 | 0.5382 | 13.6961 |
| IschemicStroke | genus. Coprococcus2. id. 11302            | Weighted median           | 22 | 0.0642  | 0.0917 | 0.4837 | -0.0035 | 0.0166 | 0.8334 | 18.7493 | 0.5382 | 13.6961 |
| IschemicStroke | genus. Coprococcus2. id. 11302            | Inverse variance weighted | 22 | 0.0176  | 0.0666 | 0.7915 | -0.0035 | 0.0166 | 0.8334 | 18.7493 | 0.5382 | 13.6961 |
| IschemicStroke | genus. Coprococcus2. id. 11302            | Simple mode               | 22 | 0.0915  | 0.1603 | 0.5743 | -0.0035 | 0.0166 | 0.8334 | 18.7493 | 0.5382 | 13.6961 |
| IschemicStroke | genus. Coprococcus2. id. 11302            | Weighted mode             | 22 | 0.1000  | 0.1561 | 0.5288 | -0.0035 | 0.0166 | 0.8334 | 18.7493 | 0.5382 | 13.6961 |
| IschemicStroke | genus. Coprococcus3. id. 11303            | MR Egger                  | 22 | -0.2644 | 0.3015 | 0.3909 | 0.0153  | 0.0162 | 0.3557 | 27.2749 | 0.1619 | 11.9099 |
| IschemicStroke | genus. Coprococcus3. id. 11303            | Weighted median           | 22 | 0.0115  | 0.0821 | 0.8889 | 0.0153  | 0.0162 | 0.3557 | 27.2749 | 0.1619 | 11.9099 |
| IschemicStroke | genus. Coprococcus3. id. 11303            | Inverse variance weighted | 22 | 0.0139  | 0.0646 | 0.8292 | 0.0153  | 0.0162 | 0.3557 | 27.2749 | 0.1619 | 11.9099 |
| IschemicStroke | genus. Coprococcus3. id. 11303            | Simple mode               | 22 | -0.0715 | 0.1459 | 0.6289 | 0.0153  | 0.0162 | 0.3557 | 27.2749 | 0.1619 | 11.9099 |
| IschemicStroke | genus. Coprococcus3. id. 11303            | Weighted mode             | 22 | 0.0087  | 0.1324 | 0.9480 | 0.0153  | 0.0162 | 0.3557 | 27.2749 | 0.1619 | 11.9099 |
| IschemicStroke | genus. DefluviitaleaceaeUCG011. id. 11287 | MR Egger                  | 22 | -0.6670 | 0.3947 | 0.1066 | 0.0290  | 0.0212 | 0.1852 | 25.6629 | 0.2196 | 5.0790  |
| IschemicStroke | genus. DefluviitaleaceaeUCG011. id. 11287 | Weighted median           | 22 | -0.1201 | 0.1103 | 0.2765 | 0.0290  | 0.0212 | 0.1852 | 25.6629 | 0.2196 | 5.0790  |
| IschemicStroke | genus. DefluviitaleaceaeUCG011. id. 11287 | Inverse variance weighted | 22 | -0.1381 | 0.0865 | 0.1103 | 0.0290  | 0.0212 | 0.1852 | 25.6629 | 0.2196 | 5.0790  |
| IschemicStroke | genus. DefluviitaleaceaeUCG011. id. 11287 | Simple mode               | 22 | -0.1438 | 0.1837 | 0.4427 | 0.0290  | 0.0212 | 0.1852 | 25.6629 | 0.2196 | 5.0790  |
| IschemicStroke | genus. DefluviitaleaceaeUCG011. id. 11287 | Weighted mode             | 22 | -0.1547 | 0.1542 | 0.3271 | 0.0290  | 0.0212 | 0.1852 | 25.6629 | 0.2196 | 5.0790  |
| IschemicStroke | genus. Desulfovibrio. id. 3173            | MR Egger                  | 22 | 0.2741  | 0.3907 | 0.4910 | -0.0185 | 0.0210 | 0.3873 | 25.7335 | 0.1748 | 8.7179  |
| IschemicStroke | genus. Desulfovibrio. id. 3173            | Weighted median           | 22 | 0.0208  | 0.1048 | 0.8429 | -0.0185 | 0.0210 | 0.3873 | 25.7335 | 0.1748 | 8.7179  |
| IschemicStroke | genus. Desulfovibrio. id. 3173            | Inverse variance weighted | 22 | -0.0631 | 0.0835 | 0.4494 | -0.0185 | 0.0210 | 0.3873 | 25.7335 | 0.1748 | 8.7179  |
| IschemicStroke | genus. Desulfovibrio. id. 3173            | Simple mode               | 22 | 0.1224  | 0.1898 | 0.5260 | -0.0185 | 0.0210 | 0.3873 | 25.7335 | 0.1748 | 8.7179  |
| IschemicStroke | genus. Desulfovibrio. id. 3173            | Weighted mode             | 22 | 0.1024  | 0.1640 | 0.5393 | -0.0185 | 0.0210 | 0.3873 | 25.7335 | 0.1748 | 8.7179  |
| IschemicStroke | genus. Dialister. id. 2183                | MR Egger                  | 22 | 0.1633  | 0.3171 | 0.6123 | -0.0165 | 0.0170 | 0.3426 | 21.8550 | 0.3484 | 8.6445  |
| IschemicStroke | genus. Dialister. id. 2183                | Weighted median           | 22 | -0.2009 | 0.0932 | 0.0312 | -0.0165 | 0.0170 | 0.3426 | 21.8550 | 0.3484 | 8.6445  |
| IschemicStroke | genus. Dialister. id. 2183                | Inverse variance weighted | 22 | -0.1378 | 0.0681 | 0.0431 | -0.0165 | 0.0170 | 0.3426 | 21.8550 | 0.3484 | 8.6445  |
| IschemicStroke | genus. Dialister. id. 2183                | Simple mode               | 22 | -0.2859 | 0.1826 | 0.1322 | -0.0165 | 0.0170 | 0.3426 | 21.8550 | 0.3484 | 8.6445  |
| IschemicStroke | genus. Dialister. id. 2183                | Weighted mode             | 22 | -0.2655 | 0.1544 | 0.1002 | -0.0165 | 0.0170 | 0.3426 | 21.8550 | 0.3484 | 8.6445  |
| IschemicStroke | genus. Dorea. id. 1997                    | MR Egger                  | 22 | 0.1475  | 0.3365 | 0.6659 | -0.0136 | 0.0180 | 0.4589 | 36.1302 | 0.0148 | 8.7816  |
| IschemicStroke | genus. Dorea. id. 1997                    | Weighted median           | 22 | -0.1120 | 0.0794 | 0.1587 | -0.0136 | 0.0180 | 0.4589 | 36.1302 | 0.0148 | 8.7816  |
| IschemicStroke | genus. Dorea. id. 1997                    | Inverse variance weighted | 22 | -0.1007 | 0.0716 | 0.1596 | -0.0136 | 0.0180 | 0.4589 | 36.1302 | 0.0148 | 8.7816  |
| IschemicStroke | genus. Dorea. id. 1997                    | Simple mode               | 22 | -0.2079 | 0.1388 | 0.1491 | -0.0136 | 0.0180 | 0.4589 | 36.1302 | 0.0148 | 8.7816  |
| IschemicStroke | genus. Dorea. id. 1997                    | Weighted mode             | 22 | -0.2034 | 0.1366 | 0.1515 | -0.0136 | 0.0180 | 0.4589 | 36.1302 | 0.0148 | 8.7816  |
| IschemicStroke | genus. Eggerthella. id. 819               | MR Egger                  | 22 | 0.3813  | 0.6116 | 0.5401 | -0.0179 | 0.0328 | 0.5910 | 35.0011 | 0.0201 | 3.3466  |
| IschemicStroke | genus. Eggerthella. id. 819               | Weighted median           | 22 | 0.0282  | 0.1474 | 0.8484 | -0.0179 | 0.0328 | 0.5910 | 35.0011 | 0.0201 | 3.3466  |
| IschemicStroke | genus. Eggerthella. id. 819               | Inverse variance weighted | 22 | 0.0550  | 0.1291 | 0.6701 | -0.0179 | 0.0328 | 0.5910 | 35.0011 | 0.0201 | 3.3466  |
| IschemicStroke | genus. Eggerthella. id. 819               | Simple mode               | 22 | 0.0340  | 0.2868 | 0.9068 | -0.0179 | 0.0328 | 0.5910 | 35.0011 | 0.0201 | 3.3466  |
| IschemicStroke | genus. Eggerthella. id. 819               | Weighted mode             | 22 | 0.0340  | 0.2432 | 0.8902 | -0.0179 | 0.0328 | 0.5910 | 35.0011 | 0.0201 | 3.3466  |
| IschemicStroke | genus. Eisenbergiella. id. 11304          | MR Egger                  | 22 | -0.5255 | 0.4417 | 0.2482 | 0.0258  | 0.0237 | 0.2890 | 19.5278 | 0.5513 | 5.8656  |
| IschemicStroke | genus. Eisenbergiella. id. 11304          | Weighted median           | 22 | -0.1461 | 0.1385 | 0.2915 | 0.0258  | 0.0237 | 0.2890 | 19.5278 | 0.5513 | 5.8656  |
| IschemicStroke | genus. Eisenbergiella. id. 11304          | Inverse variance weighted | 22 | -0.0555 | 0.0948 | 0.5584 | 0.0258  | 0.0237 | 0.2890 | 19.5278 | 0.5513 | 5.8656  |
| IschemicStroke | genus. Eisenbergiella. id. 11304          | Simple mode               | 22 | -0.2108 | 0.2432 | 0.3960 | 0.0258  | 0.0237 | 0.2890 | 19.5278 | 0.5513 | 5.8656  |
| IschemicStroke | genus. Eisenbergiella. id. 11304          | Weighted mode             | 22 | -0.2164 | 0.2209 | 0.3383 | 0.0258  | 0.0237 | 0.2890 | 19.5278 | 0.5513 | 5.8656  |
| IschemicStroke | genus. Enterorhabdus. id. 820             | MR Egger                  | 22 | 0.1081  | 0.4434 | 0.8099 | -0.0047 | 0.0238 | 0.8456 | 27.3635 | 0.1253 | 6.2704  |
| IschemicStroke | genus. Enterorhabdus. id. 820             | Weighted median           | 22 | 0.0684  | 0.1159 | 0.5551 | -0.0047 | 0.0238 | 0.8456 | 27.3635 | 0.1253 | 6.2704  |
| IschemicStroke | genus. Enterorhabdus. id. 820             | Inverse variance weighted | 22 | 0.0226  | 0.0930 | 0.8077 | -0.0047 | 0.0238 | 0.8456 | 27.3635 | 0.1253 | 6.2704  |
| IschemicStroke | genus. Enterorhabdus. id. 820             | Simple mode               | 22 | 0.2169  | 0.2504 | 0.3962 | -0.0047 | 0.0238 | 0.8456 | 27.3635 | 0.1253 | 6.2704  |
| IschemicStroke | genus. Enterorhabdus. id. 820             | Weighted mode             | 22 | 0.2107  | 0.2352 | 0.3805 | -0.0047 | 0.0238 | 0.8456 | 27.3635 | 0.1253 | 6.2704  |
| IschemicStroke | genus. Erysipelatoclostridium. id. 11381  | MR Egger                  | 22 | 0.3551  | 0.3381 | 0.3061 | -0.0180 | 0.0181 | 0.3320 | 20.4588 | 0.4296 | 10.8237 |
| IschemicStroke | genus. Erysipelatoclostridium. id. 11381  | Weighted median           | 22 | 0.0275  | 0.1024 | 0.7886 | -0.0180 | 0.0181 | 0.3320 | 20.4588 | 0.4296 | 10.8237 |
| IschemicStroke | genus. Erysipelatoclostridium. id. 11381  | Inverse variance weighted | 22 | 0.0268  | 0.0726 | 0.7121 | -0.0180 | 0.0181 | 0.3320 | 20.4588 | 0.4296 | 10.8237 |

|                |                                          |                           |    |         |        |        |         |        |        |         |        |         |
|----------------|------------------------------------------|---------------------------|----|---------|--------|--------|---------|--------|--------|---------|--------|---------|
| IschemicStroke | genus.Erysipelatoclostridium.id.11381    | Simple mode               | 22 | 0.0859  | 0.2030 | 0.6765 | -0.0180 | 0.0181 | 0.3320 | 20.4588 | 0.4296 | 10.8237 |
| IschemicStroke | genus.Erysipelatoclostridium.id.11381    | Weighted mode             | 22 | 0.0579  | 0.1752 | 0.7445 | -0.0180 | 0.0181 | 0.3320 | 20.4588 | 0.4296 | 10.8237 |
| IschemicStroke | genus.ErysipelotrichaceaeUCG003.id.11384 | MR Egger                  | 22 | -0.1989 | 0.2935 | 0.5058 | 0.0109  | 0.0157 | 0.4974 | 23.3108 | 0.2738 | 12.5525 |
| IschemicStroke | genus.ErysipelotrichaceaeUCG003.id.11384 | Weighted median           | 22 | -0.0081 | 0.0871 | 0.9261 | 0.0109  | 0.0157 | 0.4974 | 23.3108 | 0.2738 | 12.5525 |
| IschemicStroke | genus.ErysipelotrichaceaeUCG003.id.11384 | Inverse variance weighted | 22 | -0.0007 | 0.0623 | 0.9904 | 0.0109  | 0.0157 | 0.4974 | 23.3108 | 0.2738 | 12.5525 |
| IschemicStroke | genus.ErysipelotrichaceaeUCG003.id.11384 | Simple mode               | 22 | -0.1295 | 0.1640 | 0.4385 | 0.0109  | 0.0157 | 0.4974 | 23.3108 | 0.2738 | 12.5525 |
| IschemicStroke | genus.ErysipelotrichaceaeUCG003.id.11384 | Weighted mode             | 22 | -0.0820 | 0.1280 | 0.5287 | 0.0109  | 0.0157 | 0.4974 | 23.3108 | 0.2738 | 12.5525 |
| IschemicStroke | genus.Escherichia.Shigella.id.3504       | MR Egger                  | 22 | -0.2506 | 0.3038 | 0.4192 | 0.0099  | 0.0163 | 0.5482 | 17.1248 | 0.6449 | 13.5736 |
| IschemicStroke | genus.Escherichia.Shigella.id.3504       | Weighted median           | 22 | -0.0745 | 0.0924 | 0.4203 | 0.0099  | 0.0163 | 0.5482 | 17.1248 | 0.6449 | 13.5736 |
| IschemicStroke | genus.Escherichia.Shigella.id.3504       | Inverse variance weighted | 22 | -0.0694 | 0.0653 | 0.2882 | 0.0099  | 0.0163 | 0.5482 | 17.1248 | 0.6449 | 13.5736 |
| IschemicStroke | genus.Escherichia.Shigella.id.3504       | Simple mode               | 22 | -0.1133 | 0.1652 | 0.5004 | 0.0099  | 0.0163 | 0.5482 | 17.1248 | 0.6449 | 13.5736 |
| IschemicStroke | genus.Escherichia.Shigella.id.3504       | Weighted mode             | 22 | -0.1133 | 0.1558 | 0.4751 | 0.0099  | 0.0163 | 0.5482 | 17.1248 | 0.6449 | 13.5736 |
| IschemicStroke | genus.Faecalibacterium.id.2057           | MR Egger                  | 22 | -0.4082 | 0.2536 | 0.1231 | 0.0189  | 0.0136 | 0.1804 | 23.0735 | 0.3401 | 12.8646 |
| IschemicStroke | genus.Faecalibacterium.id.2057           | Weighted median           | 22 | -0.1126 | 0.0774 | 0.1459 | 0.0189  | 0.0136 | 0.1804 | 23.0735 | 0.3401 | 12.8646 |
| IschemicStroke | genus.Faecalibacterium.id.2057           | Inverse variance weighted | 22 | -0.0645 | 0.0557 | 0.2470 | 0.0189  | 0.0136 | 0.1804 | 23.0735 | 0.3401 | 12.8646 |
| IschemicStroke | genus.Faecalibacterium.id.2057           | Simple mode               | 22 | -0.2536 | 0.1640 | 0.1369 | 0.0189  | 0.0136 | 0.1804 | 23.0735 | 0.3401 | 12.8646 |
| IschemicStroke | genus.Faecalibacterium.id.2057           | Weighted mode             | 22 | -0.2216 | 0.1383 | 0.1240 | 0.0189  | 0.0136 | 0.1804 | 23.0735 | 0.3401 | 12.8646 |
| IschemicStroke | genus.FamilyXIIAD3011group.id.11293      | MR Egger                  | 22 | 0.1348  | 0.2782 | 0.6334 | -0.0038 | 0.0149 | 0.8009 | 17.3694 | 0.6289 | 16.2943 |
| IschemicStroke | genus.FamilyXIIAD3011group.id.11293      | Weighted median           | 22 | -0.0161 | 0.0839 | 0.8481 | -0.0038 | 0.0149 | 0.8009 | 17.3694 | 0.6289 | 16.2943 |
| IschemicStroke | genus.FamilyXIIAD3011group.id.11293      | Inverse variance weighted | 22 | 0.0653  | 0.0597 | 0.2742 | -0.0038 | 0.0149 | 0.8009 | 17.3694 | 0.6289 | 16.2943 |
| IschemicStroke | genus.FamilyXIIAD3011group.id.11293      | Simple mode               | 22 | -0.0918 | 0.1730 | 0.6010 | -0.0038 | 0.0149 | 0.8009 | 17.3694 | 0.6289 | 16.2943 |
| IschemicStroke | genus.FamilyXIIAD3011group.id.11293      | Weighted mode             | 22 | -0.0775 | 0.1740 | 0.6605 | -0.0038 | 0.0149 | 0.8009 | 17.3694 | 0.6289 | 16.2943 |
| IschemicStroke | genus.FamilyXIIUUG001.id.11294           | MR Egger                  | 22 | -0.3928 | 0.3606 | 0.2890 | 0.0262  | 0.0193 | 0.1905 | 33.1556 | 0.0445 | 9.1986  |
| IschemicStroke | genus.FamilyXIIUUG001.id.11294           | Weighted median           | 22 | 0.0620  | 0.0915 | 0.4982 | 0.0262  | 0.0193 | 0.1905 | 33.1556 | 0.0445 | 9.1986  |
| IschemicStroke | genus.FamilyXIIUUG001.id.11294           | Inverse variance weighted | 22 | 0.0844  | 0.0790 | 0.2851 | 0.0262  | 0.0193 | 0.1905 | 33.1556 | 0.0445 | 9.1986  |
| IschemicStroke | genus.FamilyXIIUUG001.id.11294           | Simple mode               | 22 | 0.0729  | 0.1780 | 0.6863 | 0.0262  | 0.0193 | 0.1905 | 33.1556 | 0.0445 | 9.1986  |
| IschemicStroke | genus.FamilyXIIUUG001.id.11294           | Weighted mode             | 22 | 0.0949  | 0.1683 | 0.5787 | 0.0262  | 0.0193 | 0.1905 | 33.1556 | 0.0445 | 9.1986  |
| IschemicStroke | genus.Flavonifractor.id.2059             | MR Egger                  | 22 | -0.5685 | 0.3952 | 0.1658 | 0.0294  | 0.0212 | 0.1800 | 33.4263 | 0.0417 | 6.6304  |
| IschemicStroke | genus.Flavonifractor.id.2059             | Weighted median           | 22 | -0.0271 | 0.1028 | 0.7925 | 0.0294  | 0.0212 | 0.1800 | 33.4263 | 0.0417 | 6.6304  |
| IschemicStroke | genus.Flavonifractor.id.2059             | Inverse variance weighted | 22 | -0.0323 | 0.0868 | 0.7101 | 0.0294  | 0.0212 | 0.1800 | 33.4263 | 0.0417 | 6.6304  |
| IschemicStroke | genus.Flavonifractor.id.2059             | Simple mode               | 22 | -0.0138 | 0.1971 | 0.9448 | 0.0294  | 0.0212 | 0.1800 | 33.4263 | 0.0417 | 6.6304  |
| IschemicStroke | genus.Flavonifractor.id.2059             | Weighted mode             | 22 | -0.0470 | 0.1880 | 0.8048 | 0.0294  | 0.0212 | 0.1800 | 33.4263 | 0.0417 | 6.6304  |
| IschemicStroke | genus.Fusicatenibacter.id.11305          | MR Egger                  | 22 | -0.0998 | 0.2805 | 0.7257 | 0.0046  | 0.0150 | 0.7604 | 24.7853 | 0.2098 | 12.8850 |
| IschemicStroke | genus.Fusicatenibacter.id.11305          | Weighted median           | 22 | -0.0490 | 0.0780 | 0.5294 | 0.0046  | 0.0150 | 0.7604 | 24.7853 | 0.2098 | 12.8850 |
| IschemicStroke | genus.Fusicatenibacter.id.11305          | Inverse variance weighted | 22 | -0.0151 | 0.0590 | 0.7977 | 0.0046  | 0.0150 | 0.7604 | 24.7853 | 0.2098 | 12.8850 |
| IschemicStroke | genus.Fusicatenibacter.id.11305          | Simple mode               | 22 | -0.0360 | 0.1386 | 0.7979 | 0.0046  | 0.0150 | 0.7604 | 24.7853 | 0.2098 | 12.8850 |
| IschemicStroke | genus.Fusicatenibacter.id.11305          | Weighted mode             | 22 | 0.0046  | 0.1280 | 0.9714 | 0.0046  | 0.0150 | 0.7604 | 24.7853 | 0.2098 | 12.8850 |
| IschemicStroke | genus.Gordonibacter.id.821               | MR Egger                  | 22 | -0.2052 | 0.6742 | 0.7640 | 0.0038  | 0.0361 | 0.9163 | 30.9655 | 0.0556 | 2.8514  |
| IschemicStroke | genus.Gordonibacter.id.821               | Weighted median           | 22 | -0.1602 | 0.1724 | 0.3527 | 0.0038  | 0.0361 | 0.9163 | 30.9655 | 0.0556 | 2.8514  |
| IschemicStroke | genus.Gordonibacter.id.821               | Inverse variance weighted | 22 | -0.1351 | 0.1411 | 0.3383 | 0.0038  | 0.0361 | 0.9163 | 30.9655 | 0.0556 | 2.8514  |
| IschemicStroke | genus.Gordonibacter.id.821               | Simple mode               | 22 | -0.4000 | 0.3683 | 0.2898 | 0.0038  | 0.0361 | 0.9163 | 30.9655 | 0.0556 | 2.8514  |
| IschemicStroke | genus.Gordonibacter.id.821               | Weighted mode             | 22 | -0.2239 | 0.3456 | 0.5241 | 0.0038  | 0.0361 | 0.9163 | 30.9655 | 0.0556 | 2.8514  |
| IschemicStroke | genus.Haemophilus.id.3698                | MR Egger                  | 22 | 0.6561  | 0.3492 | 0.0749 | -0.0332 | 0.0187 | 0.0911 | 14.5348 | 0.8456 | 12.6135 |
| IschemicStroke | genus.Haemophilus.id.3698                | Weighted median           | 22 | 0.0732  | 0.1013 | 0.4701 | -0.0332 | 0.0187 | 0.0911 | 14.5348 | 0.8456 | 12.6135 |
| IschemicStroke | genus.Haemophilus.id.3698                | Inverse variance weighted | 22 | 0.0509  | 0.0751 | 0.4982 | -0.0332 | 0.0187 | 0.0911 | 14.5348 | 0.8456 | 12.6135 |
| IschemicStroke | genus.Haemophilus.id.3698                | Simple mode               | 22 | 0.1457  | 0.1683 | 0.3964 | -0.0332 | 0.0187 | 0.0911 | 14.5348 | 0.8456 | 12.6135 |
| IschemicStroke | genus.Haemophilus.id.3698                | Weighted mode             | 22 | 0.1152  | 0.1511 | 0.4544 | -0.0332 | 0.0187 | 0.0911 | 14.5348 | 0.8456 | 12.6135 |
| IschemicStroke | genus.Holdemanella.id.11393              | MR Egger                  | 22 | 0.5937  | 0.4509 | 0.2028 | -0.0308 | 0.0242 | 0.2176 | 30.6597 | 0.0795 | 5.4628  |
| IschemicStroke | genus.Holdemanella.id.11393              | Weighted median           | 22 | 0.1924  | 0.1189 | 0.1056 | -0.0308 | 0.0242 | 0.2176 | 30.6597 | 0.0795 | 5.4628  |
| IschemicStroke | genus.Holdemanella.id.11393              | Inverse variance weighted | 22 | 0.0331  | 0.0983 | 0.7361 | -0.0308 | 0.0242 | 0.2176 | 30.6597 | 0.0795 | 5.4628  |
| IschemicStroke | genus.Holdemanella.id.11393              | Simple mode               | 22 | 0.2324  | 0.2276 | 0.3188 | -0.0308 | 0.0242 | 0.2176 | 30.6597 | 0.0795 | 5.4628  |
| IschemicStroke | genus.Holdemanella.id.11393              | Weighted mode             | 22 | 0.2077  | 0.1770 | 0.2538 | -0.0308 | 0.0242 | 0.2176 | 30.6597 | 0.0795 | 5.4628  |
| IschemicStroke | genus.Holdemania.id.2157                 | MR Egger                  | 22 | -0.0564 | 0.3461 | 0.8722 | 0.0076  | 0.0186 | 0.6864 | 15.7114 | 0.7344 | 11.6868 |
| IschemicStroke | genus.Holdemania.id.2157                 | Weighted median           | 22 | 0.1129  | 0.1007 | 0.2619 | 0.0076  | 0.0186 | 0.6864 | 15.7114 | 0.7344 | 11.6868 |
| IschemicStroke | genus.Holdemania.id.2157                 | Inverse variance weighted | 22 | 0.0821  | 0.0744 | 0.2698 | 0.0076  | 0.0186 | 0.6864 | 15.7114 | 0.7344 | 11.6868 |
| IschemicStroke | genus.Holdemania.id.2157                 | Simple mode               | 22 | 0.0919  | 0.1879 | 0.6298 | 0.0076  | 0.0186 | 0.6864 | 15.7114 | 0.7344 | 11.6868 |
| IschemicStroke | genus.Holdemania.id.2157                 | Weighted mode             | 22 | 0.1201  | 0.1763 | 0.5030 | 0.0076  | 0.0186 | 0.6864 | 15.7114 | 0.7344 | 11.6868 |
| IschemicStroke | genus.Howardella.id.2000                 | MR Egger                  | 22 | -0.8466 | 0.5512 | 0.1402 | 0.0439  | 0.0296 | 0.1527 | 23.1934 | 0.3338 | 3.4752  |

|                |                                            |                           |    |         |        |        |         |        |        |         |        |         |
|----------------|--------------------------------------------|---------------------------|----|---------|--------|--------|---------|--------|--------|---------|--------|---------|
| IschemicStroke | genus.Howardella.id.2000                   | Weighted median           | 22 | -0.0740 | 0.1667 | 0.6570 | 0.0439  | 0.0296 | 0.1527 | 23.1934 | 0.3338 | 3.4752  |
| IschemicStroke | genus.Howardella.id.2000                   | Inverse variance weighted | 22 | -0.0464 | 0.1218 | 0.7036 | 0.0439  | 0.0296 | 0.1527 | 23.1934 | 0.3338 | 3.4752  |
| IschemicStroke | genus.Howardella.id.2000                   | Simple mode               | 22 | 0.4811  | 0.3411 | 0.1730 | 0.0439  | 0.0296 | 0.1527 | 23.1934 | 0.3338 | 3.4752  |
| IschemicStroke | genus.Howardella.id.2000                   | Weighted mode             | 22 | -0.2139 | 0.2801 | 0.4535 | 0.0439  | 0.0296 | 0.1527 | 23.1934 | 0.3338 | 3.4752  |
| IschemicStroke | genus.Hungatella.id.11306                  | MR Egger                  | 22 | -0.0815 | 0.6077 | 0.8947 | 0.0076  | 0.0326 | 0.8177 | 27.9954 | 0.1095 | 3.1584  |
| IschemicStroke | genus.Hungatella.id.11306                  | Weighted median           | 22 | 0.0681  | 0.1541 | 0.6583 | 0.0076  | 0.0326 | 0.8177 | 27.9954 | 0.1095 | 3.1584  |
| IschemicStroke | genus.Hungatella.id.11306                  | Inverse variance weighted | 22 | 0.0572  | 0.1272 | 0.6533 | 0.0076  | 0.0326 | 0.8177 | 27.9954 | 0.1095 | 3.1584  |
| IschemicStroke | genus.Hungatella.id.11306                  | Simple mode               | 22 | 0.2332  | 0.2488 | 0.3593 | 0.0076  | 0.0326 | 0.8177 | 27.9954 | 0.1095 | 3.1584  |
| IschemicStroke | genus.Hungatella.id.11306                  | Weighted mode             | 22 | 0.1972  | 0.2366 | 0.4139 | 0.0076  | 0.0326 | 0.8177 | 27.9954 | 0.1095 | 3.1584  |
| IschemicStroke | genus.Intestinibacter.id.11345             | MR Egger                  | 22 | 0.5608  | 0.3271 | 0.1019 | -0.0295 | 0.0175 | 0.1081 | 27.4168 | 0.1575 | 8.6848  |
| IschemicStroke | genus.Intestinibacter.id.11345             | Weighted median           | 22 | -0.0046 | 0.0947 | 0.9614 | -0.0295 | 0.0175 | 0.1081 | 27.4168 | 0.1575 | 8.6848  |
| IschemicStroke | genus.Intestinibacter.id.11345             | Inverse variance weighted | 22 | 0.0233  | 0.0732 | 0.7503 | -0.0295 | 0.0175 | 0.1081 | 27.4168 | 0.1575 | 8.6848  |
| IschemicStroke | genus.Intestinibacter.id.11345             | Simple mode               | 22 | -0.1437 | 0.1991 | 0.4783 | -0.0295 | 0.0175 | 0.1081 | 27.4168 | 0.1575 | 8.6848  |
| IschemicStroke | genus.Intestinibacter.id.11345             | Weighted mode             | 22 | -0.0105 | 0.1855 | 0.9553 | -0.0295 | 0.0175 | 0.1081 | 27.4168 | 0.1575 | 8.6848  |
| IschemicStroke | genus.Intestinimonas.id.2062               | MR Egger                  | 22 | 0.1187  | 0.3302 | 0.7231 | -0.0052 | 0.0177 | 0.7709 | 23.9257 | 0.2457 | 9.5992  |
| IschemicStroke | genus.Intestinimonas.id.2062               | Weighted median           | 22 | 0.0792  | 0.0962 | 0.4104 | -0.0052 | 0.0177 | 0.7709 | 23.9257 | 0.2457 | 9.5992  |
| IschemicStroke | genus.Intestinimonas.id.2062               | Inverse variance weighted | 22 | 0.0235  | 0.0694 | 0.7354 | -0.0052 | 0.0177 | 0.7709 | 23.9257 | 0.2457 | 9.5992  |
| IschemicStroke | genus.Intestinimonas.id.2062               | Simple mode               | 22 | 0.1431  | 0.1815 | 0.4394 | -0.0052 | 0.0177 | 0.7709 | 23.9257 | 0.2457 | 9.5992  |
| IschemicStroke | genus.Intestinimonas.id.2062               | Weighted mode             | 22 | 0.0895  | 0.1708 | 0.6058 | -0.0052 | 0.0177 | 0.7709 | 23.9257 | 0.2457 | 9.5992  |
| IschemicStroke | genus.Lachnoclostridium.id.11308           | MR Egger                  | 22 | -0.1144 | 0.2515 | 0.6542 | 0.0039  | 0.0135 | 0.7746 | 20.5115 | 0.4264 | 15.3671 |
| IschemicStroke | genus.Lachnoclostridium.id.11308           | Weighted median           | 22 | -0.0742 | 0.0792 | 0.3487 | 0.0039  | 0.0135 | 0.7746 | 20.5115 | 0.4264 | 15.3671 |
| IschemicStroke | genus.Lachnoclostridium.id.11308           | Inverse variance weighted | 22 | -0.0431 | 0.0534 | 0.4201 | 0.0039  | 0.0135 | 0.7746 | 20.5115 | 0.4264 | 15.3671 |
| IschemicStroke | genus.Lachnoclostridium.id.11308           | Simple mode               | 22 | -0.0879 | 0.1575 | 0.5827 | 0.0039  | 0.0135 | 0.7746 | 20.5115 | 0.4264 | 15.3671 |
| IschemicStroke | genus.Lachnoclostridium.id.11308           | Weighted mode             | 22 | -0.1280 | 0.1584 | 0.4280 | 0.0039  | 0.0135 | 0.7746 | 20.5115 | 0.4264 | 15.3671 |
| IschemicStroke | genus.Lachnospira.id.2004                  | MR Egger                  | 22 | 0.2695  | 0.3117 | 0.3975 | -0.0188 | 0.0167 | 0.2750 | 30.8329 | 0.0765 | 11.6641 |
| IschemicStroke | genus.Lachnospira.id.2004                  | Weighted median           | 22 | -0.0170 | 0.0805 | 0.8324 | -0.0188 | 0.0167 | 0.2750 | 30.8329 | 0.0765 | 11.6641 |
| IschemicStroke | genus.Lachnospira.id.2004                  | Inverse variance weighted | 22 | -0.0722 | 0.0674 | 0.2844 | -0.0188 | 0.0167 | 0.2750 | 30.8329 | 0.0765 | 11.6641 |
| IschemicStroke | genus.Lachnospira.id.2004                  | Simple mode               | 22 | -0.2517 | 0.1487 | 0.1053 | -0.0188 | 0.0167 | 0.2750 | 30.8329 | 0.0765 | 11.6641 |
| IschemicStroke | genus.Lachnospira.id.2004                  | Weighted mode             | 22 | -0.1994 | 0.1195 | 0.1101 | -0.0188 | 0.0167 | 0.2750 | 30.8329 | 0.0765 | 11.6641 |
| IschemicStroke | genus.LachnospiraceaeFCS020group.id.11314  | MR Egger                  | 22 | 0.5212  | 0.3722 | 0.1768 | -0.0275 | 0.0200 | 0.1827 | 38.1794 | 0.0123 | 8.9307  |
| IschemicStroke | genus.LachnospiraceaeFCS020group.id.11314  | Weighted median           | 22 | -0.0310 | 0.0863 | 0.7194 | -0.0275 | 0.0200 | 0.1827 | 38.1794 | 0.0123 | 8.9307  |
| IschemicStroke | genus.LachnospiraceaeFCS020group.id.11314  | Inverse variance weighted | 22 | 0.0194  | 0.0817 | 0.8122 | -0.0275 | 0.0200 | 0.1827 | 38.1794 | 0.0123 | 8.9307  |
| IschemicStroke | genus.LachnospiraceaeFCS020group.id.11314  | Simple mode               | 22 | -0.0646 | 0.1465 | 0.6639 | -0.0275 | 0.0200 | 0.1827 | 38.1794 | 0.0123 | 8.9307  |
| IschemicStroke | genus.LachnospiraceaeFCS020group.id.11314  | Weighted mode             | 22 | -0.0698 | 0.1356 | 0.6120 | -0.0275 | 0.0200 | 0.1827 | 38.1794 | 0.0123 | 8.9307  |
| IschemicStroke | genus.LachnospiraceaeNC2004group.id.11316  | MR Egger                  | 22 | 0.1670  | 0.4785 | 0.7307 | -0.0163 | 0.0256 | 0.5330 | 25.6266 | 0.1785 | 5.3970  |
| IschemicStroke | genus.LachnospiraceaeNC2004group.id.11316  | Weighted median           | 22 | -0.0754 | 0.1379 | 0.5843 | -0.0163 | 0.0256 | 0.5330 | 25.6266 | 0.1785 | 5.3970  |
| IschemicStroke | genus.LachnospiraceaeNC2004group.id.11316  | Inverse variance weighted | 22 | -0.1295 | 0.1015 | 0.2019 | -0.0163 | 0.0256 | 0.5330 | 25.6266 | 0.1785 | 5.3970  |
| IschemicStroke | genus.LachnospiraceaeNC2004group.id.11316  | Simple mode               | 22 | -0.2232 | 0.2400 | 0.3628 | -0.0163 | 0.0256 | 0.5330 | 25.6266 | 0.1785 | 5.3970  |
| IschemicStroke | genus.LachnospiraceaeNC2004group.id.11316  | Weighted mode             | 22 | -0.1804 | 0.2151 | 0.4110 | -0.0163 | 0.0256 | 0.5330 | 25.6266 | 0.1785 | 5.3970  |
| IschemicStroke | genus.LachnospiraceaeND3007group.id.11317  | MR Egger                  | 22 | 0.2412  | 0.2684 | 0.3795 | -0.0099 | 0.0144 | 0.5013 | 15.7107 | 0.7344 | 16.3962 |
| IschemicStroke | genus.LachnospiraceaeND3007group.id.11317  | Weighted median           | 22 | 0.1235  | 0.0815 | 0.1299 | -0.0099 | 0.0144 | 0.5013 | 15.7107 | 0.7344 | 16.3962 |
| IschemicStroke | genus.LachnospiraceaeND3007group.id.11317  | Inverse variance weighted | 22 | 0.0617  | 0.0577 | 0.2848 | -0.0099 | 0.0144 | 0.5013 | 15.7107 | 0.7344 | 16.3962 |
| IschemicStroke | genus.LachnospiraceaeND3007group.id.11317  | Simple mode               | 22 | 0.1576  | 0.1542 | 0.3183 | -0.0099 | 0.0144 | 0.5013 | 15.7107 | 0.7344 | 16.3962 |
| IschemicStroke | genus.LachnospiraceaeND3007group.id.11317  | Weighted mode             | 22 | 0.1674  | 0.1319 | 0.2183 | -0.0099 | 0.0144 | 0.5013 | 15.7107 | 0.7344 | 16.3962 |
| IschemicStroke | genus.LachnospiraceaeNK4A136group.id.11319 | MR Egger                  | 22 | -0.6252 | 0.3202 | 0.0650 | 0.0314  | 0.0172 | 0.0821 | 37.3827 | 0.0152 | 11.1700 |
| IschemicStroke | genus.LachnospiraceaeNK4A136group.id.11319 | Weighted median           | 22 | -0.1347 | 0.0820 | 0.1003 | 0.0314  | 0.0172 | 0.0821 | 37.3827 | 0.0152 | 11.1700 |
| IschemicStroke | genus.LachnospiraceaeNK4A136group.id.11319 | Inverse variance weighted | 22 | -0.0527 | 0.0726 | 0.4675 | 0.0314  | 0.0172 | 0.0821 | 37.3827 | 0.0152 | 11.1700 |
| IschemicStroke | genus.LachnospiraceaeNK4A136group.id.11319 | Simple mode               | 22 | -0.1637 | 0.1511 | 0.2908 | 0.0314  | 0.0172 | 0.0821 | 37.3827 | 0.0152 | 11.1700 |
| IschemicStroke | genus.LachnospiraceaeNK4A136group.id.11319 | Weighted mode             | 22 | -0.1734 | 0.1342 | 0.2102 | 0.0314  | 0.0172 | 0.0821 | 37.3827 | 0.0152 | 11.1700 |
| IschemicStroke | genus.LachnospiraceaeUCG001.id.11321       | MR Egger                  | 22 | -0.1382 | 0.3276 | 0.6776 | 0.0031  | 0.0176 | 0.8603 | 12.0679 | 0.9137 | 13.8088 |
| IschemicStroke | genus.LachnospiraceaeUCG001.id.11321       | Weighted median           | 22 | -0.0334 | 0.0950 | 0.7254 | 0.0031  | 0.0176 | 0.8603 | 12.0679 | 0.9137 | 13.8088 |
| IschemicStroke | genus.LachnospiraceaeUCG001.id.11321       | Inverse variance weighted | 22 | -0.0811 | 0.0704 | 0.2489 | 0.0031  | 0.0176 | 0.8603 | 12.0679 | 0.9137 | 13.8088 |
| IschemicStroke | genus.LachnospiraceaeUCG001.id.11321       | Simple mode               | 22 | -0.0374 | 0.1651 | 0.8229 | 0.0031  | 0.0176 | 0.8603 | 12.0679 | 0.9137 | 13.8088 |
| IschemicStroke | genus.LachnospiraceaeUCG001.id.11321       | Weighted mode             | 22 | -0.0337 | 0.1415 | 0.8139 | 0.0031  | 0.0176 | 0.8603 | 12.0679 | 0.9137 | 13.8088 |
| IschemicStroke | genus.LachnospiraceaeUCG004.id.11324       | MR Egger                  | 22 | 0.3023  | 0.2769 | 0.2880 | -0.0163 | 0.0148 | 0.2845 | 19.0678 | 0.5808 | 15.6453 |
| IschemicStroke | genus.LachnospiraceaeUCG004.id.11324       | Weighted median           | 22 | 0.0178  | 0.0839 | 0.8320 | -0.0163 | 0.0148 | 0.2845 | 19.0678 | 0.5808 | 15.6453 |
| IschemicStroke | genus.LachnospiraceaeUCG004.id.11324       | Inverse variance weighted | 22 | 0.0049  | 0.0595 | 0.9346 | -0.0163 | 0.0148 | 0.2845 | 19.0678 | 0.5808 | 15.6453 |
| IschemicStroke | genus.LachnospiraceaeUCG004.id.11324       | Simple mode               | 22 | -0.2184 | 0.1842 | 0.2488 | -0.0163 | 0.0148 | 0.2845 | 19.0678 | 0.5808 | 15.6453 |

|                |                                         |                           |    |         |        |        |         |        |        |         |        |         |
|----------------|-----------------------------------------|---------------------------|----|---------|--------|--------|---------|--------|--------|---------|--------|---------|
| IschemicStroke | genus. LachnospiraceaeUCG004. id. 11324 | Weighted mode             | 22 | 0.1123  | 0.1479 | 0.4562 | -0.0163 | 0.0148 | 0.2845 | 19.0678 | 0.5808 | 15.6453 |
| IschemicStroke | genus. LachnospiraceaeUCG008. id. 11328 | MR Egger                  | 22 | 0.0334  | 0.3959 | 0.9337 | -0.0047 | 0.0212 | 0.8267 | 12.7545 | 0.8877 | 10.4831 |
| IschemicStroke | genus. LachnospiraceaeUCG008. id. 11328 | Weighted median           | 22 | -0.0300 | 0.1196 | 0.8021 | -0.0047 | 0.0212 | 0.8267 | 12.7545 | 0.8877 | 10.4831 |
| IschemicStroke | genus. LachnospiraceaeUCG008. id. 11328 | Inverse variance weighted | 22 | -0.0524 | 0.0852 | 0.5385 | -0.0047 | 0.0212 | 0.8267 | 12.7545 | 0.8877 | 10.4831 |
| IschemicStroke | genus. LachnospiraceaeUCG008. id. 11328 | Simple mode               | 22 | -0.0934 | 0.2154 | 0.6690 | -0.0047 | 0.0212 | 0.8267 | 12.7545 | 0.8877 | 10.4831 |
| IschemicStroke | genus. LachnospiraceaeUCG008. id. 11328 | Weighted mode             | 22 | -0.0170 | 0.1771 | 0.9243 | -0.0047 | 0.0212 | 0.8267 | 12.7545 | 0.8877 | 10.4831 |
| IschemicStroke | genus. LachnospiraceaeUCG010. id. 11330 | MR Egger                  | 22 | -0.4352 | 0.3880 | 0.2754 | 0.0249  | 0.0208 | 0.2449 | 38.5415 | 0.0111 | 6.5313  |
| IschemicStroke | genus. LachnospiraceaeUCG010. id. 11330 | Weighted median           | 22 | 0.1294  | 0.0967 | 0.1807 | 0.0249  | 0.0208 | 0.2449 | 38.5415 | 0.0111 | 6.5313  |
| IschemicStroke | genus. LachnospiraceaeUCG010. id. 11330 | Inverse variance weighted | 22 | 0.0189  | 0.0842 | 0.8223 | 0.0249  | 0.0208 | 0.2449 | 38.5415 | 0.0111 | 6.5313  |
| IschemicStroke | genus. LachnospiraceaeUCG010. id. 11330 | Simple mode               | 22 | 0.2969  | 0.2336 | 0.2177 | 0.0249  | 0.0208 | 0.2449 | 38.5415 | 0.0111 | 6.5313  |
| IschemicStroke | genus. LachnospiraceaeUCG010. id. 11330 | Weighted mode             | 22 | 0.2519  | 0.1733 | 0.1608 | 0.0249  | 0.0208 | 0.2449 | 38.5415 | 0.0111 | 6.5313  |
| IschemicStroke | genus. Lactobacillus. id. 1837          | MR Egger                  | 22 | -0.2533 | 0.4000 | 0.5337 | 0.0133  | 0.0214 | 0.5429 | 19.6546 | 0.4797 | 6.7493  |
| IschemicStroke | genus. Lactobacillus. id. 1837          | Weighted median           | 22 | -0.0289 | 0.1200 | 0.8100 | 0.0133  | 0.0214 | 0.5429 | 19.6546 | 0.4797 | 6.7493  |
| IschemicStroke | genus. Lactobacillus. id. 1837          | Inverse variance weighted | 22 | -0.0115 | 0.0859 | 0.8936 | 0.0133  | 0.0214 | 0.5429 | 19.6546 | 0.4797 | 6.7493  |
| IschemicStroke | genus. Lactobacillus. id. 1837          | Simple mode               | 22 | 0.0121  | 0.2273 | 0.9580 | 0.0133  | 0.0214 | 0.5429 | 19.6546 | 0.4797 | 6.7493  |
| IschemicStroke | genus. Lactobacillus. id. 1837          | Weighted mode             | 22 | -0.0137 | 0.2022 | 0.9467 | 0.0133  | 0.0214 | 0.5429 | 19.6546 | 0.4797 | 6.7493  |
| IschemicStroke | genus. Lactococcus. id. 1851            | MR Egger                  | 22 | 0.4280  | 0.5318 | 0.4303 | -0.0198 | 0.0285 | 0.4955 | 20.7434 | 0.4124 | 4.8458  |
| IschemicStroke | genus. Lactococcus. id. 1851            | Weighted median           | 22 | -0.1222 | 0.1619 | 0.4505 | -0.0198 | 0.0285 | 0.4955 | 20.7434 | 0.4124 | 4.8458  |
| IschemicStroke | genus. Lactococcus. id. 1851            | Inverse variance weighted | 22 | 0.0674  | 0.1125 | 0.5492 | -0.0198 | 0.0285 | 0.4955 | 20.7434 | 0.4124 | 4.8458  |
| IschemicStroke | genus. Lactococcus. id. 1851            | Simple mode               | 22 | -0.3198 | 0.3404 | 0.3582 | -0.0198 | 0.0285 | 0.4955 | 20.7434 | 0.4124 | 4.8458  |
| IschemicStroke | genus. Lactococcus. id. 1851            | Weighted mode             | 22 | -0.3131 | 0.3314 | 0.3556 | -0.0198 | 0.0285 | 0.4955 | 20.7434 | 0.4124 | 4.8458  |
| IschemicStroke | genus. Marvinbryantia. id. 2005         | MR Egger                  | 22 | -0.2106 | 0.4208 | 0.6221 | 0.0126  | 0.0226 | 0.5839 | 38.8214 | 0.0070 | 7.0966  |
| IschemicStroke | genus. Marvinbryantia. id. 2005         | Weighted median           | 22 | 0.0972  | 0.0889 | 0.2743 | 0.0126  | 0.0226 | 0.5839 | 38.8214 | 0.0070 | 7.0966  |
| IschemicStroke | genus. Marvinbryantia. id. 2005         | Inverse variance weighted | 22 | 0.0181  | 0.0888 | 0.8381 | 0.0126  | 0.0226 | 0.5839 | 38.8214 | 0.0070 | 7.0966  |
| IschemicStroke | genus. Marvinbryantia. id. 2005         | Simple mode               | 22 | 0.0114  | 0.1540 | 0.9419 | 0.0126  | 0.0226 | 0.5839 | 38.8214 | 0.0070 | 7.0966  |
| IschemicStroke | genus. Marvinbryantia. id. 2005         | Weighted mode             | 22 | 0.0825  | 0.1296 | 0.5315 | 0.0126  | 0.0226 | 0.5839 | 38.8214 | 0.0070 | 7.0966  |
| IschemicStroke | genus. Methanobrevibacter. id. 123      | MR Egger                  | 22 | 0.5976  | 0.5540 | 0.2935 | -0.0281 | 0.0297 | 0.3563 | 15.3790 | 0.8035 | 4.9715  |
| IschemicStroke | genus. Methanobrevibacter. id. 123      | Weighted median           | 22 | -0.0250 | 0.1597 | 0.8756 | -0.0281 | 0.0297 | 0.3563 | 15.3790 | 0.8035 | 4.9715  |
| IschemicStroke | genus. Methanobrevibacter. id. 123      | Inverse variance weighted | 22 | 0.0867  | 0.1185 | 0.4647 | -0.0281 | 0.0297 | 0.3563 | 15.3790 | 0.8035 | 4.9715  |
| IschemicStroke | genus. Methanobrevibacter. id. 123      | Simple mode               | 22 | -0.0602 | 0.2805 | 0.8322 | -0.0281 | 0.0297 | 0.3563 | 15.3790 | 0.8035 | 4.9715  |
| IschemicStroke | genus. Methanobrevibacter. id. 123      | Weighted mode             | 22 | 0.0288  | 0.2694 | 0.9159 | -0.0281 | 0.0297 | 0.3563 | 15.3790 | 0.8035 | 4.9715  |
| IschemicStroke | genus. Odoribacter. id. 952             | MR Egger                  | 22 | -0.2344 | 0.3154 | 0.4660 | 0.0179  | 0.0169 | 0.3017 | 28.0551 | 0.1386 | 10.6522 |
| IschemicStroke | genus. Odoribacter. id. 952             | Weighted median           | 22 | -0.0158 | 0.0861 | 0.8547 | 0.0179  | 0.0169 | 0.3017 | 28.0551 | 0.1386 | 10.6522 |
| IschemicStroke | genus. Odoribacter. id. 952             | Inverse variance weighted | 22 | 0.0922  | 0.0680 | 0.1749 | 0.0179  | 0.0169 | 0.3017 | 28.0551 | 0.1386 | 10.6522 |
| IschemicStroke | genus. Odoribacter. id. 952             | Simple mode               | 22 | -0.0979 | 0.1628 | 0.5539 | 0.0179  | 0.0169 | 0.3017 | 28.0551 | 0.1386 | 10.6522 |
| IschemicStroke | genus. Odoribacter. id. 952             | Weighted mode             | 22 | -0.0643 | 0.1554 | 0.6832 | 0.0179  | 0.0169 | 0.3017 | 28.0551 | 0.1386 | 10.6522 |
| IschemicStroke | genus. Olsenella. id. 822               | MR Egger                  | 22 | 0.6405  | 0.5848 | 0.2865 | -0.0319 | 0.0313 | 0.3213 | 24.7864 | 0.2565 | 3.6288  |
| IschemicStroke | genus. Olsenella. id. 822               | Weighted median           | 22 | 0.1242  | 0.1609 | 0.4399 | -0.0319 | 0.0313 | 0.3213 | 24.7864 | 0.2565 | 3.6288  |
| IschemicStroke | genus. Olsenella. id. 822               | Inverse variance weighted | 22 | 0.0595  | 0.1256 | 0.6357 | -0.0319 | 0.0313 | 0.3213 | 24.7864 | 0.2565 | 3.6288  |
| IschemicStroke | genus. Olsenella. id. 822               | Simple mode               | 22 | -0.0390 | 0.2999 | 0.8977 | -0.0319 | 0.0313 | 0.3213 | 24.7864 | 0.2565 | 3.6288  |
| IschemicStroke | genus. Olsenella. id. 822               | Weighted mode             | 22 | 0.1215  | 0.2975 | 0.6872 | -0.0319 | 0.0313 | 0.3213 | 24.7864 | 0.2565 | 3.6288  |
| IschemicStroke | genus. Oscillibacter. id. 2063          | MR Egger                  | 22 | -0.4260 | 0.4308 | 0.3346 | 0.0223  | 0.0231 | 0.3448 | 31.7174 | 0.0625 | 6.2895  |
| IschemicStroke | genus. Oscillibacter. id. 2063          | Weighted median           | 22 | 0.0613  | 0.1125 | 0.5859 | 0.0223  | 0.0231 | 0.3448 | 31.7174 | 0.0625 | 6.2895  |
| IschemicStroke | genus. Oscillibacter. id. 2063          | Inverse variance weighted | 22 | -0.0188 | 0.0925 | 0.8385 | 0.0223  | 0.0231 | 0.3448 | 31.7174 | 0.0625 | 6.2895  |
| IschemicStroke | genus. Oscillibacter. id. 2063          | Simple mode               | 22 | 0.1239  | 0.2496 | 0.6246 | 0.0223  | 0.0231 | 0.3448 | 31.7174 | 0.0625 | 6.2895  |
| IschemicStroke | genus. Oscillibacter. id. 2063          | Weighted mode             | 22 | 0.1459  | 0.2327 | 0.5373 | 0.0223  | 0.0231 | 0.3448 | 31.7174 | 0.0625 | 6.2895  |
| IschemicStroke | genus. Oscillospira. id. 2064           | MR Egger                  | 22 | -0.6521 | 0.3920 | 0.1118 | 0.0347  | 0.0210 | 0.1140 | 32.3561 | 0.0539 | 7.1457  |
| IschemicStroke | genus. Oscillospira. id. 2064           | Weighted median           | 22 | -0.0072 | 0.1049 | 0.9454 | 0.0347  | 0.0210 | 0.1140 | 32.3561 | 0.0539 | 7.1457  |
| IschemicStroke | genus. Oscillospira. id. 2064           | Inverse variance weighted | 22 | -0.0193 | 0.0876 | 0.8257 | 0.0347  | 0.0210 | 0.1140 | 32.3561 | 0.0539 | 7.1457  |
| IschemicStroke | genus. Oscillospira. id. 2064           | Simple mode               | 22 | -0.0052 | 0.1908 | 0.9785 | 0.0347  | 0.0210 | 0.1140 | 32.3561 | 0.0539 | 7.1457  |
| IschemicStroke | genus. Oscillospira. id. 2064           | Weighted mode             | 22 | -0.0534 | 0.1997 | 0.7918 | 0.0347  | 0.0210 | 0.1140 | 32.3561 | 0.0539 | 7.1457  |
| IschemicStroke | genus. Oxalobacter. id. 2978            | MR Egger                  | 22 | -0.1921 | 0.4852 | 0.6963 | 0.0109  | 0.0260 | 0.6803 | 16.6484 | 0.6757 | 6.5060  |
| IschemicStroke | genus. Oxalobacter. id. 2978            | Weighted median           | 22 | 0.0389  | 0.1427 | 0.7851 | 0.0109  | 0.0260 | 0.6803 | 16.6484 | 0.6757 | 6.5060  |
| IschemicStroke | genus. Oxalobacter. id. 2978            | Inverse variance weighted | 22 | 0.0061  | 0.1041 | 0.9535 | 0.0109  | 0.0260 | 0.6803 | 16.6484 | 0.6757 | 6.5060  |
| IschemicStroke | genus. Oxalobacter. id. 2978            | Simple mode               | 22 | 0.0148  | 0.2806 | 0.9584 | 0.0109  | 0.0260 | 0.6803 | 16.6484 | 0.6757 | 6.5060  |
| IschemicStroke | genus. Oxalobacter. id. 2978            | Weighted mode             | 22 | 0.0556  | 0.2153 | 0.7986 | 0.0109  | 0.0260 | 0.6803 | 16.6484 | 0.6757 | 6.5060  |
| IschemicStroke | genus. Parabacteroides. id. 954         | MR Egger                  | 22 | -0.1521 | 0.2528 | 0.5542 | 0.0119  | 0.0136 | 0.3893 | 19.1741 | 0.5105 | 14.0206 |
| IschemicStroke | genus. Parabacteroides. id. 954         | Weighted median           | 22 | 0.1393  | 0.0781 | 0.0744 | 0.0119  | 0.0136 | 0.3893 | 19.1741 | 0.5105 | 14.0206 |

|                |                                         |                           |    |         |        |        |         |        |        |         |        |         |
|----------------|-----------------------------------------|---------------------------|----|---------|--------|--------|---------|--------|--------|---------|--------|---------|
| IschemicStroke | genus.Parabacteroides.id.954            | Inverse variance weighted | 22 | 0.0652  | 0.0544 | 0.2305 | 0.0119  | 0.0136 | 0.3893 | 19.1741 | 0.5105 | 14.0206 |
| IschemicStroke | genus.Parabacteroides.id.954            | Simple mode               | 22 | 0.1526  | 0.1491 | 0.3178 | 0.0119  | 0.0136 | 0.3893 | 19.1741 | 0.5105 | 14.0206 |
| IschemicStroke | genus.Parabacteroides.id.954            | Weighted mode             | 22 | 0.1472  | 0.1335 | 0.2826 | 0.0119  | 0.0136 | 0.3893 | 19.1741 | 0.5105 | 14.0206 |
| IschemicStroke | genus.Paraprevotella.id.962             | MR Egger                  | 22 | 0.2955  | 0.3954 | 0.4636 | -0.0187 | 0.0212 | 0.3881 | 18.6337 | 0.5457 | 8.3048  |
| IschemicStroke | genus.Paraprevotella.id.962             | Weighted median           | 22 | -0.0789 | 0.1177 | 0.5026 | -0.0187 | 0.0212 | 0.3881 | 18.6337 | 0.5457 | 8.3048  |
| IschemicStroke | genus.Paraprevotella.id.962             | Inverse variance weighted | 22 | -0.0452 | 0.0851 | 0.5950 | -0.0187 | 0.0212 | 0.3881 | 18.6337 | 0.5457 | 8.3048  |
| IschemicStroke | genus.Paraprevotella.id.962             | Simple mode               | 22 | -0.1275 | 0.2248 | 0.5767 | -0.0187 | 0.0212 | 0.3881 | 18.6337 | 0.5457 | 8.3048  |
| IschemicStroke | genus.Paraprevotella.id.962             | Weighted mode             | 22 | -0.1116 | 0.2216 | 0.6196 | -0.0187 | 0.0212 | 0.3881 | 18.6337 | 0.5457 | 8.3048  |
| IschemicStroke | genus.Parasutterella.id.2892            | MR Egger                  | 22 | -0.4348 | 0.3139 | 0.1813 | 0.0248  | 0.0168 | 0.1565 | 22.6334 | 0.3638 | 11.5946 |
| IschemicStroke | genus.Parasutterella.id.2892            | Weighted median           | 22 | 0.0397  | 0.0921 | 0.6663 | 0.0248  | 0.0168 | 0.1565 | 22.6334 | 0.3638 | 11.5946 |
| IschemicStroke | genus.Parasutterella.id.2892            | Inverse variance weighted | 22 | 0.0166  | 0.0693 | 0.8107 | 0.0248  | 0.0168 | 0.1565 | 22.6334 | 0.3638 | 11.5946 |
| IschemicStroke | genus.Parasutterella.id.2892            | Simple mode               | 22 | 0.1046  | 0.1615 | 0.5243 | 0.0248  | 0.0168 | 0.1565 | 22.6334 | 0.3638 | 11.5946 |
| IschemicStroke | genus.Parasutterella.id.2892            | Weighted mode             | 22 | 0.0998  | 0.1448 | 0.4981 | 0.0248  | 0.0168 | 0.1565 | 22.6334 | 0.3638 | 11.5946 |
| IschemicStroke | genus.Peptococcus.id.2037               | MR Egger                  | 22 | -0.1816 | 0.4385 | 0.6832 | 0.0192  | 0.0235 | 0.4233 | 11.9997 | 0.9161 | 8.3180  |
| IschemicStroke | genus.Peptococcus.id.2037               | Weighted median           | 22 | 0.1178  | 0.1298 | 0.3640 | 0.0192  | 0.0235 | 0.4233 | 11.9997 | 0.9161 | 8.3180  |
| IschemicStroke | genus.Peptococcus.id.2037               | Inverse variance weighted | 22 | 0.1685  | 0.0942 | 0.0735 | 0.0192  | 0.0235 | 0.4233 | 11.9997 | 0.9161 | 8.3180  |
| IschemicStroke | genus.Peptococcus.id.2037               | Simple mode               | 22 | 0.0754  | 0.2421 | 0.7586 | 0.0192  | 0.0235 | 0.4233 | 11.9997 | 0.9161 | 8.3180  |
| IschemicStroke | genus.Peptococcus.id.2037               | Weighted mode             | 22 | 0.0087  | 0.2490 | 0.9724 | 0.0192  | 0.0235 | 0.4233 | 11.9997 | 0.9161 | 8.3180  |
| IschemicStroke | genus.Phascolarctobacterium.id.2168     | MR Egger                  | 22 | -0.1355 | 0.3164 | 0.6729 | 0.0108  | 0.0170 | 0.5331 | 18.2027 | 0.5741 | 9.2534  |
| IschemicStroke | genus.Phascolarctobacterium.id.2168     | Weighted median           | 22 | 0.0399  | 0.0983 | 0.6844 | 0.0108  | 0.0170 | 0.5331 | 18.2027 | 0.5741 | 9.2534  |
| IschemicStroke | genus.Phascolarctobacterium.id.2168     | Inverse variance weighted | 22 | 0.0605  | 0.0680 | 0.3738 | 0.0108  | 0.0170 | 0.5331 | 18.2027 | 0.5741 | 9.2534  |
| IschemicStroke | genus.Phascolarctobacterium.id.2168     | Simple mode               | 22 | 0.0354  | 0.2022 | 0.8628 | 0.0108  | 0.0170 | 0.5331 | 18.2027 | 0.5741 | 9.2534  |
| IschemicStroke | genus.Phascolarctobacterium.id.2168     | Weighted mode             | 22 | 0.0192  | 0.1739 | 0.9132 | 0.0108  | 0.0170 | 0.5331 | 18.2027 | 0.5741 | 9.2534  |
| IschemicStroke | genus.Prevotella7.id.11182              | MR Egger                  | 22 | 0.1322  | 0.6244 | 0.8345 | -0.0033 | 0.0335 | 0.9220 | 24.9722 | 0.2025 | 3.1113  |
| IschemicStroke | genus.Prevotella7.id.11182              | Weighted median           | 22 | 0.0052  | 0.1631 | 0.9746 | -0.0033 | 0.0335 | 0.9220 | 24.9722 | 0.2025 | 3.1113  |
| IschemicStroke | genus.Prevotella7.id.11182              | Inverse variance weighted | 22 | 0.0717  | 0.1307 | 0.5833 | -0.0033 | 0.0335 | 0.9220 | 24.9722 | 0.2025 | 3.1113  |
| IschemicStroke | genus.Prevotella7.id.11182              | Simple mode               | 22 | -0.1648 | 0.3127 | 0.6038 | -0.0033 | 0.0335 | 0.9220 | 24.9722 | 0.2025 | 3.1113  |
| IschemicStroke | genus.Prevotella7.id.11182              | Weighted mode             | 22 | -0.0423 | 0.2590 | 0.8717 | -0.0033 | 0.0335 | 0.9220 | 24.9722 | 0.2025 | 3.1113  |
| IschemicStroke | genus.Prevotella9.id.11183              | MR Egger                  | 22 | 0.4554  | 0.3314 | 0.1846 | -0.0282 | 0.0178 | 0.1282 | 12.3559 | 0.9295 | 14.6791 |
| IschemicStroke | genus.Prevotella9.id.11183              | Weighted median           | 22 | -0.1241 | 0.0982 | 0.2062 | -0.0282 | 0.0178 | 0.1282 | 12.3559 | 0.9295 | 14.6791 |
| IschemicStroke | genus.Prevotella9.id.11183              | Inverse variance weighted | 22 | -0.0583 | 0.0713 | 0.4132 | -0.0282 | 0.0178 | 0.1282 | 12.3559 | 0.9295 | 14.6791 |
| IschemicStroke | genus.Prevotella9.id.11183              | Simple mode               | 22 | -0.1919 | 0.1762 | 0.2884 | -0.0282 | 0.0178 | 0.1282 | 12.3559 | 0.9295 | 14.6791 |
| IschemicStroke | genus.Prevotella9.id.11183              | Weighted mode             | 22 | -0.1612 | 0.1702 | 0.3543 | -0.0282 | 0.0178 | 0.1282 | 12.3559 | 0.9295 | 14.6791 |
| IschemicStroke | genus.RikenellaceaeRC9gutgroup.id.11191 | MR Egger                  | 22 | -0.6582 | 0.5731 | 0.2643 | 0.0286  | 0.0307 | 0.3624 | 18.9744 | 0.5235 | 3.4188  |
| IschemicStroke | genus.RikenellaceaeRC9gutgroup.id.11191 | Weighted median           | 22 | -0.1545 | 0.1839 | 0.4009 | 0.0286  | 0.0307 | 0.3624 | 18.9744 | 0.5235 | 3.4188  |
| IschemicStroke | genus.RikenellaceaeRC9gutgroup.id.11191 | Inverse variance weighted | 22 | -0.1365 | 0.1233 | 0.2682 | 0.0286  | 0.0307 | 0.3624 | 18.9744 | 0.5235 | 3.4188  |
| IschemicStroke | genus.RikenellaceaeRC9gutgroup.id.11191 | Simple mode               | 22 | 0.1310  | 0.3383 | 0.7026 | 0.0286  | 0.0307 | 0.3624 | 18.9744 | 0.5235 | 3.4188  |
| IschemicStroke | genus.RikenellaceaeRC9gutgroup.id.11191 | Weighted mode             | 22 | 0.0407  | 0.2910 | 0.8900 | 0.0286  | 0.0307 | 0.3624 | 18.9744 | 0.5235 | 3.4188  |
| IschemicStroke | genus.Romboutsia.id.11347               | MR Egger                  | 22 | 0.3614  | 0.2956 | 0.2356 | -0.0168 | 0.0158 | 0.3030 | 23.7337 | 0.3061 | 12.3886 |
| IschemicStroke | genus.Romboutsia.id.11347               | Weighted median           | 22 | 0.1206  | 0.0870 | 0.1658 | -0.0168 | 0.0158 | 0.3030 | 23.7337 | 0.3061 | 12.3886 |
| IschemicStroke | genus.Romboutsia.id.11347               | Inverse variance weighted | 22 | 0.0562  | 0.0637 | 0.3771 | -0.0168 | 0.0158 | 0.3030 | 23.7337 | 0.3061 | 12.3886 |
| IschemicStroke | genus.Romboutsia.id.11347               | Simple mode               | 22 | 0.1925  | 0.1545 | 0.2264 | -0.0168 | 0.0158 | 0.3030 | 23.7337 | 0.3061 | 12.3886 |
| IschemicStroke | genus.Romboutsia.id.11347               | Weighted mode             | 22 | 0.1654  | 0.1375 | 0.2424 | -0.0168 | 0.0158 | 0.3030 | 23.7337 | 0.3061 | 12.3886 |
| IschemicStroke | genus.Roseburia.id.2012                 | MR Egger                  | 22 | 0.0050  | 0.2620 | 0.9848 | -0.0043 | 0.0140 | 0.7602 | 22.1979 | 0.3299 | 13.4179 |
| IschemicStroke | genus.Roseburia.id.2012                 | Weighted median           | 22 | -0.0499 | 0.0798 | 0.5318 | -0.0043 | 0.0140 | 0.7602 | 22.1979 | 0.3299 | 13.4179 |
| IschemicStroke | genus.Roseburia.id.2012                 | Inverse variance weighted | 22 | -0.0741 | 0.0551 | 0.1786 | -0.0043 | 0.0140 | 0.7602 | 22.1979 | 0.3299 | 13.4179 |
| IschemicStroke | genus.Roseburia.id.2012                 | Simple mode               | 22 | -0.1347 | 0.1438 | 0.3595 | -0.0043 | 0.0140 | 0.7602 | 22.1979 | 0.3299 | 13.4179 |
| IschemicStroke | genus.Roseburia.id.2012                 | Weighted mode             | 22 | -0.1021 | 0.1318 | 0.4474 | -0.0043 | 0.0140 | 0.7602 | 22.1979 | 0.3299 | 13.4179 |
| IschemicStroke | genus.Ruminiclostridium5.id.11355       | MR Egger                  | 22 | -0.0720 | 0.2515 | 0.7777 | 0.0037  | 0.0135 | 0.7839 | 15.8275 | 0.7273 | 19.5331 |
| IschemicStroke | genus.Ruminiclostridium5.id.11355       | Weighted median           | 22 | 0.0408  | 0.0773 | 0.5980 | 0.0037  | 0.0135 | 0.7839 | 15.8275 | 0.7273 | 19.5331 |
| IschemicStroke | genus.Ruminiclostridium5.id.11355       | Inverse variance weighted | 22 | -0.0037 | 0.0541 | 0.9454 | 0.0037  | 0.0135 | 0.7839 | 15.8275 | 0.7273 | 19.5331 |
| IschemicStroke | genus.Ruminiclostridium5.id.11355       | Simple mode               | 22 | 0.0283  | 0.1453 | 0.8477 | 0.0037  | 0.0135 | 0.7839 | 15.8275 | 0.7273 | 19.5331 |
| IschemicStroke | genus.Ruminiclostridium5.id.11355       | Weighted mode             | 22 | 0.0531  | 0.1215 | 0.6664 | 0.0037  | 0.0135 | 0.7839 | 15.8275 | 0.7273 | 19.5331 |
| IschemicStroke | genus.Ruminiclostridium6.id.11356       | MR Egger                  | 22 | -0.6039 | 0.2860 | 0.0475 | 0.0309  | 0.0153 | 0.0574 | 19.0233 | 0.5836 | 14.7587 |
| IschemicStroke | genus.Ruminiclostridium6.id.11356       | Weighted median           | 22 | -0.1486 | 0.0825 | 0.0717 | 0.0309  | 0.0153 | 0.0574 | 19.0233 | 0.5836 | 14.7587 |
| IschemicStroke | genus.Ruminiclostridium6.id.11356       | Inverse variance weighted | 22 | -0.0406 | 0.0614 | 0.5085 | 0.0309  | 0.0153 | 0.0574 | 19.0233 | 0.5836 | 14.7587 |
| IschemicStroke | genus.Ruminiclostridium6.id.11356       | Simple mode               | 22 | -0.1787 | 0.1421 | 0.2225 | 0.0309  | 0.0153 | 0.0574 | 19.0233 | 0.5836 | 14.7587 |
| IschemicStroke | genus.Ruminiclostridium6.id.11356       | Weighted mode             | 22 | -0.1895 | 0.1241 | 0.1415 | 0.0309  | 0.0153 | 0.0574 | 19.0233 | 0.5836 | 14.7587 |

|                |                                              |                           |    |         |        |        |         |        |        |         |        |         |
|----------------|----------------------------------------------|---------------------------|----|---------|--------|--------|---------|--------|--------|---------|--------|---------|
| IschemicStroke | genus.Ruminiclostridium9. id. 11357          | MR Egger                  | 22 | -0.5691 | 0.2568 | 0.0384 | 0.0293  | 0.0138 | 0.0456 | 23.8178 | 0.3020 | 13.8009 |
| IschemicStroke | genus.Ruminiclostridium9. id. 11357          | Weighted median           | 22 | -0.0295 | 0.0781 | 0.7054 | 0.0293  | 0.0138 | 0.0456 | 23.8178 | 0.3020 | 13.8009 |
| IschemicStroke | genus.Ruminiclostridium9. id. 11357          | Inverse variance weighted | 22 | -0.0346 | 0.0588 | 0.5563 | 0.0293  | 0.0138 | 0.0456 | 23.8178 | 0.3020 | 13.8009 |
| IschemicStroke | genus.Ruminiclostridium9. id. 11357          | Simple mode               | 22 | -0.0485 | 0.1524 | 0.7533 | 0.0293  | 0.0138 | 0.0456 | 23.8178 | 0.3020 | 13.8009 |
| IschemicStroke | genus.Ruminiclostridium9. id. 11357          | Weighted mode             | 22 | -0.0621 | 0.1207 | 0.6124 | 0.0293  | 0.0138 | 0.0456 | 23.8178 | 0.3020 | 13.8009 |
| IschemicStroke | genus.RuminococcaceaeNK4A214group. id. 11358 | MR Egger                  | 22 | 0.1684  | 0.2684 | 0.5376 | -0.0107 | 0.0144 | 0.4647 | 12.9070 | 0.8813 | 19.3099 |
| IschemicStroke | genus.RuminococcaceaeNK4A214group. id. 11358 | Weighted median           | 22 | 0.0312  | 0.0787 | 0.6919 | -0.0107 | 0.0144 | 0.4647 | 12.9070 | 0.8813 | 19.3099 |
| IschemicStroke | genus.RuminococcaceaeNK4A214group. id. 11358 | Inverse variance weighted | 22 | -0.0271 | 0.0577 | 0.6389 | -0.0107 | 0.0144 | 0.4647 | 12.9070 | 0.8813 | 19.3099 |
| IschemicStroke | genus.RuminococcaceaeNK4A214group. id. 11358 | Simple mode               | 22 | 0.1290  | 0.1465 | 0.3886 | -0.0107 | 0.0144 | 0.4647 | 12.9070 | 0.8813 | 19.3099 |
| IschemicStroke | genus.RuminococcaceaeNK4A214group. id. 11358 | Weighted mode             | 22 | 0.1017  | 0.1422 | 0.4824 | -0.0107 | 0.0144 | 0.4647 | 12.9070 | 0.8813 | 19.3099 |
| IschemicStroke | genus.RuminococcaceaeUCG002. id. 11360       | MR Egger                  | 22 | -0.0056 | 0.2640 | 0.9834 | 0.0003  | 0.0142 | 0.9829 | 21.6090 | 0.3621 | 13.2899 |
| IschemicStroke | genus.RuminococcaceaeUCG002. id. 11360       | Weighted median           | 22 | 0.0050  | 0.0806 | 0.9502 | 0.0003  | 0.0142 | 0.9829 | 21.6090 | 0.3621 | 13.2899 |
| IschemicStroke | genus.RuminococcaceaeUCG002. id. 11360       | Inverse variance weighted | 22 | 0.0000  | 0.0554 | 0.9995 | 0.0003  | 0.0142 | 0.9829 | 21.6090 | 0.3621 | 13.2899 |
| IschemicStroke | genus.RuminococcaceaeUCG002. id. 11360       | Simple mode               | 22 | 0.0012  | 0.1388 | 0.9930 | 0.0003  | 0.0142 | 0.9829 | 21.6090 | 0.3621 | 13.2899 |
| IschemicStroke | genus.RuminococcaceaeUCG002. id. 11360       | Weighted mode             | 22 | 0.0054  | 0.1210 | 0.9650 | 0.0003  | 0.0142 | 0.9829 | 21.6090 | 0.3621 | 13.2899 |
| IschemicStroke | genus.RuminococcaceaeUCG003. id. 11361       | MR Egger                  | 22 | -0.5979 | 0.4027 | 0.1532 | 0.0297  | 0.0216 | 0.1839 | 46.2640 | 0.0012 | 8.1187  |
| IschemicStroke | genus.RuminococcaceaeUCG003. id. 11361       | Weighted median           | 22 | -0.0633 | 0.0830 | 0.4456 | 0.0297  | 0.0216 | 0.1839 | 46.2640 | 0.0012 | 8.1187  |
| IschemicStroke | genus.RuminococcaceaeUCG003. id. 11361       | Inverse variance weighted | 22 | -0.0566 | 0.0884 | 0.5219 | 0.0297  | 0.0216 | 0.1839 | 46.2640 | 0.0012 | 8.1187  |
| IschemicStroke | genus.RuminococcaceaeUCG003. id. 11361       | Simple mode               | 22 | -0.0605 | 0.1361 | 0.6610 | 0.0297  | 0.0216 | 0.1839 | 46.2640 | 0.0012 | 8.1187  |
| IschemicStroke | genus.RuminococcaceaeUCG003. id. 11361       | Weighted mode             | 22 | -0.0724 | 0.1105 | 0.5194 | 0.0297  | 0.0216 | 0.1839 | 46.2640 | 0.0012 | 8.1187  |
| IschemicStroke | genus.RuminococcaceaeUCG004. id. 11362       | MR Egger                  | 22 | -0.2888 | 0.3398 | 0.4054 | 0.0166  | 0.0182 | 0.3722 | 19.5940 | 0.4836 | 10.5037 |
| IschemicStroke | genus.RuminococcaceaeUCG004. id. 11362       | Weighted median           | 22 | -0.0278 | 0.1035 | 0.7883 | 0.0166  | 0.0182 | 0.3722 | 19.5940 | 0.4836 | 10.5037 |
| IschemicStroke | genus.RuminococcaceaeUCG004. id. 11362       | Inverse variance weighted | 22 | 0.0141  | 0.0730 | 0.8465 | 0.0166  | 0.0182 | 0.3722 | 19.5940 | 0.4836 | 10.5037 |
| IschemicStroke | genus.RuminococcaceaeUCG004. id. 11362       | Simple mode               | 22 | 0.0900  | 0.2054 | 0.6659 | 0.0166  | 0.0182 | 0.3722 | 19.5940 | 0.4836 | 10.5037 |
| IschemicStroke | genus.RuminococcaceaeUCG004. id. 11362       | Weighted mode             | 22 | 0.1133  | 0.1991 | 0.5753 | 0.0166  | 0.0182 | 0.3722 | 19.5940 | 0.4836 | 10.5037 |
| IschemicStroke | genus.RuminococcaceaeUCG005. id. 11363       | MR Egger                  | 22 | -0.3169 | 0.3058 | 0.3125 | 0.0185  | 0.0164 | 0.2736 | 29.1351 | 0.1108 | 12.9297 |
| IschemicStroke | genus.RuminococcaceaeUCG005. id. 11363       | Weighted median           | 22 | -0.0555 | 0.0792 | 0.4834 | 0.0185  | 0.0164 | 0.2736 | 29.1351 | 0.1108 | 12.9297 |
| IschemicStroke | genus.RuminococcaceaeUCG005. id. 11363       | Inverse variance weighted | 22 | 0.0194  | 0.0662 | 0.7699 | 0.0185  | 0.0164 | 0.2736 | 29.1351 | 0.1108 | 12.9297 |
| IschemicStroke | genus.RuminococcaceaeUCG005. id. 11363       | Simple mode               | 22 | -0.1245 | 0.1342 | 0.3642 | 0.0185  | 0.0164 | 0.2736 | 29.1351 | 0.1108 | 12.9297 |
| IschemicStroke | genus.RuminococcaceaeUCG005. id. 11363       | Weighted mode             | 22 | -0.1416 | 0.1309 | 0.2918 | 0.0185  | 0.0164 | 0.2736 | 29.1351 | 0.1108 | 12.9297 |
| IschemicStroke | genus.RuminococcaceaeUCG009. id. 11366       | MR Egger                  | 22 | -0.1764 | 0.3822 | 0.6494 | 0.0089  | 0.0205 | 0.6672 | 17.1170 | 0.6454 | 10.5147 |
| IschemicStroke | genus.RuminococcaceaeUCG009. id. 11366       | Weighted median           | 22 | 0.0030  | 0.1205 | 0.9803 | 0.0089  | 0.0205 | 0.6672 | 17.1170 | 0.6454 | 10.5147 |
| IschemicStroke | genus.RuminococcaceaeUCG009. id. 11366       | Inverse variance weighted | 22 | -0.0135 | 0.0821 | 0.8696 | 0.0089  | 0.0205 | 0.6672 | 17.1170 | 0.6454 | 10.5147 |
| IschemicStroke | genus.RuminococcaceaeUCG009. id. 11366       | Simple mode               | 22 | 0.1738  | 0.2191 | 0.4366 | 0.0089  | 0.0205 | 0.6672 | 17.1170 | 0.6454 | 10.5147 |
| IschemicStroke | genus.RuminococcaceaeUCG009. id. 11366       | Weighted mode             | 22 | 0.0301  | 0.2068 | 0.8858 | 0.0089  | 0.0205 | 0.6672 | 17.1170 | 0.6454 | 10.5147 |
| IschemicStroke | genus.RuminococcaceaeUCG010. id. 11367       | MR Egger                  | 22 | -0.3970 | 0.2920 | 0.1891 | 0.0197  | 0.0157 | 0.2231 | 17.2822 | 0.6939 | 14.2784 |
| IschemicStroke | genus.RuminococcaceaeUCG010. id. 11367       | Weighted median           | 22 | -0.1053 | 0.0904 | 0.2442 | 0.0197  | 0.0157 | 0.2231 | 17.2822 | 0.6939 | 14.2784 |
| IschemicStroke | genus.RuminococcaceaeUCG010. id. 11367       | Inverse variance weighted | 22 | -0.0384 | 0.0627 | 0.5399 | 0.0197  | 0.0157 | 0.2231 | 17.2822 | 0.6939 | 14.2784 |
| IschemicStroke | genus.RuminococcaceaeUCG010. id. 11367       | Simple mode               | 22 | -0.1555 | 0.1674 | 0.3636 | 0.0197  | 0.0157 | 0.2231 | 17.2822 | 0.6939 | 14.2784 |
| IschemicStroke | genus.RuminococcaceaeUCG010. id. 11367       | Weighted mode             | 22 | -0.1555 | 0.1321 | 0.2524 | 0.0197  | 0.0157 | 0.2231 | 17.2822 | 0.6939 | 14.2784 |
| IschemicStroke | genus.RuminococcaceaeUCG011. id. 11368       | MR Egger                  | 22 | -0.3885 | 0.7445 | 0.6075 | 0.0210  | 0.0399 | 0.6045 | 37.7177 | 0.0096 | 2.4569  |
| IschemicStroke | genus.RuminococcaceaeUCG011. id. 11368       | Weighted median           | 22 | 0.1015  | 0.1763 | 0.5647 | 0.0210  | 0.0399 | 0.6045 | 37.7177 | 0.0096 | 2.4569  |
| IschemicStroke | genus.RuminococcaceaeUCG011. id. 11368       | Inverse variance weighted | 22 | -0.0059 | 0.1571 | 0.9701 | 0.0210  | 0.0399 | 0.6045 | 37.7177 | 0.0096 | 2.4569  |
| IschemicStroke | genus.RuminococcaceaeUCG011. id. 11368       | Simple mode               | 22 | 0.1828  | 0.3261 | 0.5810 | 0.0210  | 0.0399 | 0.6045 | 37.7177 | 0.0096 | 2.4569  |
| IschemicStroke | genus.RuminococcaceaeUCG011. id. 11368       | Weighted mode             | 22 | 0.1375  | 0.3307 | 0.6818 | 0.0210  | 0.0399 | 0.6045 | 37.7177 | 0.0096 | 2.4569  |
| IschemicStroke | genus.RuminococcaceaeUCG013. id. 11370       | MR Egger                  | 22 | -0.3295 | 0.2603 | 0.2200 | 0.0130  | 0.0140 | 0.3631 | 20.6473 | 0.4181 | 12.5854 |
| IschemicStroke | genus.RuminococcaceaeUCG013. id. 11370       | Weighted median           | 22 | -0.1516 | 0.0836 | 0.0698 | 0.0130  | 0.0140 | 0.3631 | 20.6473 | 0.4181 | 12.5854 |
| IschemicStroke | genus.RuminococcaceaeUCG013. id. 11370       | Inverse variance weighted | 22 | -0.0929 | 0.0558 | 0.0956 | 0.0130  | 0.0140 | 0.3631 | 20.6473 | 0.4181 | 12.5854 |
| IschemicStroke | genus.RuminococcaceaeUCG013. id. 11370       | Simple mode               | 22 | 0.1491  | 0.1705 | 0.3915 | 0.0130  | 0.0140 | 0.3631 | 20.6473 | 0.4181 | 12.5854 |
| IschemicStroke | genus.RuminococcaceaeUCG013. id. 11370       | Weighted mode             | 22 | -0.2560 | 0.1496 | 0.1017 | 0.0130  | 0.0140 | 0.3631 | 20.6473 | 0.4181 | 12.5854 |
| IschemicStroke | genus.RuminococcaceaeUCG014. id. 11371       | MR Egger                  | 22 | -0.1076 | 0.2761 | 0.7010 | 0.0078  | 0.0148 | 0.6041 | 14.8602 | 0.7843 | 19.3266 |
| IschemicStroke | genus.RuminococcaceaeUCG014. id. 11371       | Weighted median           | 22 | 0.0236  | 0.0814 | 0.7720 | 0.0078  | 0.0148 | 0.6041 | 14.8602 | 0.7843 | 19.3266 |
| IschemicStroke | genus.RuminococcaceaeUCG014. id. 11371       | Inverse variance weighted | 22 | 0.0345  | 0.0593 | 0.5609 | 0.0078  | 0.0148 | 0.6041 | 14.8602 | 0.7843 | 19.3266 |
| IschemicStroke | genus.RuminococcaceaeUCG014. id. 11371       | Simple mode               | 22 | 0.0418  | 0.1377 | 0.7643 | 0.0078  | 0.0148 | 0.6041 | 14.8602 | 0.7843 | 19.3266 |
| IschemicStroke | genus.RuminococcaceaeUCG014. id. 11371       | Weighted mode             | 22 | 0.0264  | 0.1196 | 0.8277 | 0.0078  | 0.0148 | 0.6041 | 14.8602 | 0.7843 | 19.3266 |
| IschemicStroke | genus.Ruminococcus1. id. 11373               | MR Egger                  | 22 | -0.0488 | 0.2577 | 0.8516 | -0.0015 | 0.0138 | 0.9124 | 19.5768 | 0.4847 | 13.5578 |
| IschemicStroke | genus.Ruminococcus1. id. 11373               | Weighted median           | 22 | -0.0704 | 0.0760 | 0.3540 | -0.0015 | 0.0138 | 0.9124 | 19.5768 | 0.4847 | 13.5578 |
| IschemicStroke | genus.Ruminococcus1. id. 11373               | Inverse variance weighted | 22 | -0.0769 | 0.0554 | 0.1653 | -0.0015 | 0.0138 | 0.9124 | 19.5768 | 0.4847 | 13.5578 |

|                |                                     |                           |    |         |        |        |         |        |        |         |        |         |
|----------------|-------------------------------------|---------------------------|----|---------|--------|--------|---------|--------|--------|---------|--------|---------|
| IschemicStroke | genus. Ruminococcus1. id. 11373     | Simple mode               | 22 | -0.0723 | 0.1321 | 0.5899 | -0.0015 | 0.0138 | 0.9124 | 19.5768 | 0.4847 | 13.5578 |
| IschemicStroke | genus. Ruminococcus1. id. 11373     | Weighted mode             | 22 | -0.0840 | 0.1211 | 0.4958 | -0.0015 | 0.0138 | 0.9124 | 19.5768 | 0.4847 | 13.5578 |
| IschemicStroke | genus. Ruminococcus2. id. 11374     | MR Egger                  | 22 | -0.6229 | 0.2678 | 0.0307 | 0.0323  | 0.0144 | 0.0358 | 24.1086 | 0.2878 | 12.5392 |
| IschemicStroke | genus. Ruminococcus2. id. 11374     | Weighted median           | 22 | -0.0899 | 0.0862 | 0.2970 | 0.0323  | 0.0144 | 0.0358 | 24.1086 | 0.2878 | 12.5392 |
| IschemicStroke | genus. Ruminococcus2. id. 11374     | Inverse variance weighted | 22 | -0.0343 | 0.0617 | 0.5785 | 0.0323  | 0.0144 | 0.0358 | 24.1086 | 0.2878 | 12.5392 |
| IschemicStroke | genus. Ruminococcus2. id. 11374     | Simple mode               | 22 | -0.1549 | 0.1842 | 0.4097 | 0.0323  | 0.0144 | 0.0358 | 24.1086 | 0.2878 | 12.5392 |
| IschemicStroke | genus. Ruminococcus2. id. 11374     | Weighted mode             | 22 | -0.1922 | 0.1438 | 0.1958 | 0.0323  | 0.0144 | 0.0358 | 24.1086 | 0.2878 | 12.5392 |
| IschemicStroke | genus. Sellimonas. id. 14369        | MR Egger                  | 22 | 0.8414  | 0.5851 | 0.1659 | -0.0472 | 0.0314 | 0.1480 | 15.7507 | 0.7835 | 4.1819  |
| IschemicStroke | genus. Sellimonas. id. 14369        | Weighted median           | 22 | -0.0894 | 0.1741 | 0.6077 | -0.0472 | 0.0314 | 0.1480 | 15.7507 | 0.7835 | 4.1819  |
| IschemicStroke | genus. Sellimonas. id. 14369        | Inverse variance weighted | 22 | -0.0187 | 0.1255 | 0.8818 | -0.0472 | 0.0314 | 0.1480 | 15.7507 | 0.7835 | 4.1819  |
| IschemicStroke | genus. Sellimonas. id. 14369        | Simple mode               | 22 | -0.2045 | 0.3433 | 0.5577 | -0.0472 | 0.0314 | 0.1480 | 15.7507 | 0.7835 | 4.1819  |
| IschemicStroke | genus. Sellimonas. id. 14369        | Weighted mode             | 22 | -0.1339 | 0.2927 | 0.6520 | -0.0472 | 0.0314 | 0.1480 | 15.7507 | 0.7835 | 4.1819  |
| IschemicStroke | genus. Senegalimassilia. id. 11160  | MR Egger                  | 22 | -0.1585 | 0.3971 | 0.6940 | 0.0087  | 0.0213 | 0.6871 | 18.5706 | 0.5499 | 7.9262  |
| IschemicStroke | genus. Senegalimassilia. id. 11160  | Weighted median           | 22 | 0.0686  | 0.1205 | 0.5693 | 0.0087  | 0.0213 | 0.6871 | 18.5706 | 0.5499 | 7.9262  |
| IschemicStroke | genus. Senegalimassilia. id. 11160  | Inverse variance weighted | 22 | 0.0000  | 0.0853 | 1.0000 | 0.0087  | 0.0213 | 0.6871 | 18.5706 | 0.5499 | 7.9262  |
| IschemicStroke | genus. Senegalimassilia. id. 11160  | Simple mode               | 22 | 0.0874  | 0.2078 | 0.6784 | 0.0087  | 0.0213 | 0.6871 | 18.5706 | 0.5499 | 7.9262  |
| IschemicStroke | genus. Senegalimassilia. id. 11160  | Weighted mode             | 22 | 0.0521  | 0.1797 | 0.7745 | 0.0087  | 0.0213 | 0.6871 | 18.5706 | 0.5499 | 7.9262  |
| IschemicStroke | genus. Slackia. id. 825             | MR Egger                  | 22 | -0.3572 | 0.5156 | 0.4964 | 0.0226  | 0.0276 | 0.4231 | 29.6933 | 0.0750 | 4.8166  |
| IschemicStroke | genus. Slackia. id. 825             | Weighted median           | 22 | 0.1531  | 0.1284 | 0.2333 | 0.0226  | 0.0276 | 0.4231 | 29.6933 | 0.0750 | 4.8166  |
| IschemicStroke | genus. Slackia. id. 825             | Inverse variance weighted | 22 | 0.0547  | 0.1099 | 0.6190 | 0.0226  | 0.0276 | 0.4231 | 29.6933 | 0.0750 | 4.8166  |
| IschemicStroke | genus. Slackia. id. 825             | Simple mode               | 22 | 0.1896  | 0.2315 | 0.4221 | 0.0226  | 0.0276 | 0.4231 | 29.6933 | 0.0750 | 4.8166  |
| IschemicStroke | genus. Slackia. id. 825             | Weighted mode             | 22 | 0.2110  | 0.1894 | 0.2778 | 0.0226  | 0.0276 | 0.4231 | 29.6933 | 0.0750 | 4.8166  |
| IschemicStroke | genus. Streptococcus. id. 1853      | MR Egger                  | 22 | -0.1876 | 0.2819 | 0.5133 | 0.0109  | 0.0151 | 0.4801 | 23.6492 | 0.2581 | 12.6446 |
| IschemicStroke | genus. Streptococcus. id. 1853      | Weighted median           | 22 | 0.0739  | 0.0841 | 0.3797 | 0.0109  | 0.0151 | 0.4801 | 23.6492 | 0.2581 | 12.6446 |
| IschemicStroke | genus. Streptococcus. id. 1853      | Inverse variance weighted | 22 | 0.0105  | 0.0599 | 0.8605 | 0.0109  | 0.0151 | 0.4801 | 23.6492 | 0.2581 | 12.6446 |
| IschemicStroke | genus. Streptococcus. id. 1853      | Simple mode               | 22 | 0.1164  | 0.1707 | 0.5025 | 0.0109  | 0.0151 | 0.4801 | 23.6492 | 0.2581 | 12.6446 |
| IschemicStroke | genus. Streptococcus. id. 1853      | Weighted mode             | 22 | 0.1339  | 0.1357 | 0.3350 | 0.0109  | 0.0151 | 0.4801 | 23.6492 | 0.2581 | 12.6446 |
| IschemicStroke | genus. Sutterella. id. 2896         | MR Egger                  | 22 | -0.0604 | 0.3873 | 0.8777 | 0.0040  | 0.0208 | 0.8508 | 35.8824 | 0.0159 | 7.5111  |
| IschemicStroke | genus. Sutterella. id. 2896         | Weighted median           | 22 | 0.0530  | 0.0944 | 0.5746 | 0.0040  | 0.0208 | 0.8508 | 35.8824 | 0.0159 | 7.5111  |
| IschemicStroke | genus. Sutterella. id. 2896         | Inverse variance weighted | 22 | 0.0117  | 0.0814 | 0.8858 | 0.0040  | 0.0208 | 0.8508 | 35.8824 | 0.0159 | 7.5111  |
| IschemicStroke | genus. Sutterella. id. 2896         | Simple mode               | 22 | 0.3007  | 0.2413 | 0.2265 | 0.0040  | 0.0208 | 0.8508 | 35.8824 | 0.0159 | 7.5111  |
| IschemicStroke | genus. Sutterella. id. 2896         | Weighted mode             | 22 | 0.2812  | 0.2130 | 0.2011 | 0.0040  | 0.0208 | 0.8508 | 35.8824 | 0.0159 | 7.5111  |
| IschemicStroke | genus. Terrisporobacter. id. 11348  | MR Egger                  | 22 | 0.2604  | 0.5280 | 0.6272 | -0.0121 | 0.0283 | 0.6738 | 33.8366 | 0.0273 | 3.4308  |
| IschemicStroke | genus. Terrisporobacter. id. 11348  | Weighted median           | 22 | -0.0096 | 0.1304 | 0.9414 | -0.0121 | 0.0283 | 0.6738 | 33.8366 | 0.0273 | 3.4308  |
| IschemicStroke | genus. Terrisporobacter. id. 11348  | Inverse variance weighted | 22 | 0.0401  | 0.1110 | 0.7178 | -0.0121 | 0.0283 | 0.6738 | 33.8366 | 0.0273 | 3.4308  |
| IschemicStroke | genus. Terrisporobacter. id. 11348  | Simple mode               | 22 | -0.0522 | 0.2119 | 0.8077 | -0.0121 | 0.0283 | 0.6738 | 33.8366 | 0.0273 | 3.4308  |
| IschemicStroke | genus. Terrisporobacter. id. 11348  | Weighted mode             | 22 | -0.0388 | 0.1680 | 0.8198 | -0.0121 | 0.0283 | 0.6738 | 33.8366 | 0.0273 | 3.4308  |
| IschemicStroke | genus. Turicibacter. id. 2162       | MR Egger                  | 22 | 0.2348  | 0.3758 | 0.5392 | -0.0104 | 0.0201 | 0.6109 | 23.1400 | 0.2820 | 7.8088  |
| IschemicStroke | genus. Turicibacter. id. 2162       | Weighted median           | 22 | 0.0956  | 0.1020 | 0.3487 | -0.0104 | 0.0201 | 0.6109 | 23.1400 | 0.2820 | 7.8088  |
| IschemicStroke | genus. Turicibacter. id. 2162       | Inverse variance weighted | 22 | 0.0451  | 0.0793 | 0.5698 | -0.0104 | 0.0201 | 0.6109 | 23.1400 | 0.2820 | 7.8088  |
| IschemicStroke | genus. Turicibacter. id. 2162       | Simple mode               | 22 | 0.1216  | 0.1761 | 0.4972 | -0.0104 | 0.0201 | 0.6109 | 23.1400 | 0.2820 | 7.8088  |
| IschemicStroke | genus. Turicibacter. id. 2162       | Weighted mode             | 22 | 0.1847  | 0.1559 | 0.2494 | -0.0104 | 0.0201 | 0.6109 | 23.1400 | 0.2820 | 7.8088  |
| IschemicStroke | genus. Tyzzerella3. id. 11335       | MR Egger                  | 22 | -0.3443 | 0.5952 | 0.5694 | 0.0217  | 0.0319 | 0.5036 | 34.2355 | 0.0246 | 3.8171  |
| IschemicStroke | genus. Tyzzerella3. id. 11335       | Weighted median           | 22 | 0.0901  | 0.1498 | 0.5474 | 0.0217  | 0.0319 | 0.5036 | 34.2355 | 0.0246 | 3.8171  |
| IschemicStroke | genus. Tyzzerella3. id. 11335       | Inverse variance weighted | 22 | 0.0516  | 0.1261 | 0.6822 | 0.0217  | 0.0319 | 0.5036 | 34.2355 | 0.0246 | 3.8171  |
| IschemicStroke | genus. Tyzzerella3. id. 11335       | Simple mode               | 22 | 0.3223  | 0.3117 | 0.3130 | 0.0217  | 0.0319 | 0.5036 | 34.2355 | 0.0246 | 3.8171  |
| IschemicStroke | genus. Tyzzerella3. id. 11335       | Weighted mode             | 22 | 0.1900  | 0.2733 | 0.4944 | 0.0217  | 0.0319 | 0.5036 | 34.2355 | 0.0246 | 3.8171  |
| IschemicStroke | genus. Veillonella. id. 2198        | MR Egger                  | 22 | 0.3392  | 0.3467 | 0.3396 | -0.0133 | 0.0186 | 0.4840 | 15.1333 | 0.7687 | 10.8859 |
| IschemicStroke | genus. Veillonella. id. 2198        | Weighted median           | 22 | 0.1410  | 0.1037 | 0.1740 | -0.0133 | 0.0186 | 0.4840 | 15.1333 | 0.7687 | 10.8859 |
| IschemicStroke | genus. Veillonella. id. 2198        | Inverse variance weighted | 22 | 0.0977  | 0.0745 | 0.1898 | -0.0133 | 0.0186 | 0.4840 | 15.1333 | 0.7687 | 10.8859 |
| IschemicStroke | genus. Veillonella. id. 2198        | Simple mode               | 22 | 0.1623  | 0.1686 | 0.3467 | -0.0133 | 0.0186 | 0.4840 | 15.1333 | 0.7687 | 10.8859 |
| IschemicStroke | genus. Veillonella. id. 2198        | Weighted mode             | 22 | 0.1216  | 0.1555 | 0.4430 | -0.0133 | 0.0186 | 0.4840 | 15.1333 | 0.7687 | 10.8859 |
| IschemicStroke | genus. Victivallis. id. 2256        | MR Egger                  | 19 | -0.9900 | 0.6519 | 0.1472 | 0.0377  | 0.0347 | 0.2931 | 15.4580 | 0.6303 | 2.7934  |
| IschemicStroke | genus. Victivallis. id. 2256        | Weighted median           | 19 | -0.3301 | 0.1810 | 0.0682 | 0.0377  | 0.0347 | 0.2931 | 15.4580 | 0.6303 | 2.7934  |
| IschemicStroke | genus. Victivallis. id. 2256        | Inverse variance weighted | 19 | -0.2976 | 0.1328 | 0.0251 | 0.0377  | 0.0347 | 0.2931 | 15.4580 | 0.6303 | 2.7934  |
| IschemicStroke | genus. Victivallis. id. 2256        | Simple mode               | 19 | -0.3554 | 0.3202 | 0.2816 | 0.0377  | 0.0347 | 0.2931 | 15.4580 | 0.6303 | 2.7934  |
| IschemicStroke | genus. Victivallis. id. 2256        | Weighted mode             | 19 | -0.2043 | 0.2813 | 0.4771 | 0.0377  | 0.0347 | 0.2931 | 15.4580 | 0.6303 | 2.7934  |
| IschemicStroke | genus. unknowngenus. id. 1000000073 | MR Egger                  | 22 | 0.0467  | 0.3228 | 0.8865 | -0.0046 | 0.0173 | 0.7938 | 14.8043 | 0.7875 | 14.9799 |

|                |                                     |                           |    |         |        |        |         |        |        |         |        |         |
|----------------|-------------------------------------|---------------------------|----|---------|--------|--------|---------|--------|--------|---------|--------|---------|
| IschemicStroke | genus. unknowngenus. id. 1000000073 | Weighted median           | 22 | 0.0236  | 0.0982 | 0.8098 | -0.0046 | 0.0173 | 0.7938 | 14.8043 | 0.7875 | 14.9799 |
| IschemicStroke | genus. unknowngenus. id. 1000000073 | Inverse variance weighted | 22 | -0.0368 | 0.0694 | 0.5953 | -0.0046 | 0.0173 | 0.7938 | 14.8043 | 0.7875 | 14.9799 |
| IschemicStroke | genus. unknowngenus. id. 1000000073 | Simple mode               | 22 | 0.0593  | 0.1864 | 0.7533 | -0.0046 | 0.0173 | 0.7938 | 14.8043 | 0.7875 | 14.9799 |
| IschemicStroke | genus. unknowngenus. id. 1000000073 | Weighted mode             | 22 | 0.0791  | 0.1573 | 0.6202 | -0.0046 | 0.0173 | 0.7938 | 14.8043 | 0.7875 | 14.9799 |
| IschemicStroke | genus. unknowngenus. id. 1000001215 | MR Egger                  | 22 | -0.6820 | 0.4312 | 0.1294 | 0.0349  | 0.0231 | 0.1468 | 15.6475 | 0.7891 | 7.1671  |
| IschemicStroke | genus. unknowngenus. id. 1000001215 | Weighted median           | 22 | -0.0669 | 0.1230 | 0.5865 | 0.0349  | 0.0231 | 0.1468 | 15.6475 | 0.7891 | 7.1671  |
| IschemicStroke | genus. unknowngenus. id. 1000001215 | Inverse variance weighted | 22 | -0.0463 | 0.0925 | 0.6166 | 0.0349  | 0.0231 | 0.1468 | 15.6475 | 0.7891 | 7.1671  |
| IschemicStroke | genus. unknowngenus. id. 1000001215 | Simple mode               | 22 | 0.3021  | 0.2453 | 0.2317 | 0.0349  | 0.0231 | 0.1468 | 15.6475 | 0.7891 | 7.1671  |
| IschemicStroke | genus. unknowngenus. id. 1000001215 | Weighted mode             | 22 | -0.3119 | 0.2386 | 0.2053 | 0.0349  | 0.0231 | 0.1468 | 15.6475 | 0.7891 | 7.1671  |
| IschemicStroke | genus. unknowngenus. id. 1000005472 | MR Egger                  | 22 | 0.5313  | 0.3477 | 0.1422 | -0.0328 | 0.0186 | 0.0936 | 26.3462 | 0.1936 | 9.0704  |
| IschemicStroke | genus. unknowngenus. id. 1000005472 | Weighted median           | 22 | -0.0650 | 0.1031 | 0.5286 | -0.0328 | 0.0186 | 0.0936 | 26.3462 | 0.1936 | 9.0704  |
| IschemicStroke | genus. unknowngenus. id. 1000005472 | Inverse variance weighted | 22 | -0.0665 | 0.0784 | 0.3962 | -0.0328 | 0.0186 | 0.0936 | 26.3462 | 0.1936 | 9.0704  |
| IschemicStroke | genus. unknowngenus. id. 1000005472 | Simple mode               | 22 | -0.0735 | 0.1981 | 0.7142 | -0.0328 | 0.0186 | 0.0936 | 26.3462 | 0.1936 | 9.0704  |
| IschemicStroke | genus. unknowngenus. id. 1000005472 | Weighted mode             | 22 | -0.0930 | 0.1721 | 0.5947 | -0.0328 | 0.0186 | 0.0936 | 26.3462 | 0.1936 | 9.0704  |
| IschemicStroke | genus. unknowngenus. id. 1000005479 | MR Egger                  | 22 | 0.1643  | 0.3718 | 0.6632 | -0.0095 | 0.0199 | 0.6406 | 14.3645 | 0.8115 | 11.2299 |
| IschemicStroke | genus. unknowngenus. id. 1000005479 | Weighted median           | 22 | 0.0457  | 0.1113 | 0.6813 | -0.0095 | 0.0199 | 0.6406 | 14.3645 | 0.8115 | 11.2299 |
| IschemicStroke | genus. unknowngenus. id. 1000005479 | Inverse variance weighted | 22 | -0.0078 | 0.0800 | 0.9224 | -0.0095 | 0.0199 | 0.6406 | 14.3645 | 0.8115 | 11.2299 |
| IschemicStroke | genus. unknowngenus. id. 1000005479 | Simple mode               | 22 | -0.0059 | 0.2136 | 0.9781 | -0.0095 | 0.0199 | 0.6406 | 14.3645 | 0.8115 | 11.2299 |
| IschemicStroke | genus. unknowngenus. id. 1000005479 | Weighted mode             | 22 | 0.0025  | 0.1866 | 0.9896 | -0.0095 | 0.0199 | 0.6406 | 14.3645 | 0.8115 | 11.2299 |
| IschemicStroke | genus. unknowngenus. id. 1000006162 | MR Egger                  | 22 | -0.8215 | 0.6032 | 0.1884 | 0.0406  | 0.0324 | 0.2240 | 37.0129 | 0.0168 | 3.7515  |
| IschemicStroke | genus. unknowngenus. id. 1000006162 | Weighted median           | 22 | -0.0518 | 0.1550 | 0.7381 | 0.0406  | 0.0324 | 0.2240 | 37.0129 | 0.0168 | 3.7515  |
| IschemicStroke | genus. unknowngenus. id. 1000006162 | Inverse variance weighted | 22 | -0.0823 | 0.1312 | 0.5307 | 0.0406  | 0.0324 | 0.2240 | 37.0129 | 0.0168 | 3.7515  |
| IschemicStroke | genus. unknowngenus. id. 1000006162 | Simple mode               | 22 | -0.0443 | 0.2780 | 0.8749 | 0.0406  | 0.0324 | 0.2240 | 37.0129 | 0.0168 | 3.7515  |
| IschemicStroke | genus. unknowngenus. id. 1000006162 | Weighted mode             | 22 | -0.0682 | 0.2658 | 0.8001 | 0.0406  | 0.0324 | 0.2240 | 37.0129 | 0.0168 | 3.7515  |
| IschemicStroke | genus. unknowngenus. id. 1868       | MR Egger                  | 22 | 0.4570  | 0.3463 | 0.2018 | -0.0220 | 0.0186 | 0.2503 | 24.2431 | 0.2814 | 9.5204  |
| IschemicStroke | genus. unknowngenus. id. 1868       | Weighted median           | 22 | 0.0315  | 0.0992 | 0.7510 | -0.0220 | 0.0186 | 0.2503 | 24.2431 | 0.2814 | 9.5204  |
| IschemicStroke | genus. unknowngenus. id. 1868       | Inverse variance weighted | 22 | 0.0566  | 0.0750 | 0.4501 | -0.0220 | 0.0186 | 0.2503 | 24.2431 | 0.2814 | 9.5204  |
| IschemicStroke | genus. unknowngenus. id. 1868       | Simple mode               | 22 | -0.0411 | 0.1654 | 0.8062 | -0.0220 | 0.0186 | 0.2503 | 24.2431 | 0.2814 | 9.5204  |
| IschemicStroke | genus. unknowngenus. id. 1868       | Weighted mode             | 22 | -0.0186 | 0.1456 | 0.8993 | -0.0220 | 0.0186 | 0.2503 | 24.2431 | 0.2814 | 9.5204  |
| IschemicStroke | genus. unknowngenus. id. 2001       | MR Egger                  | 22 | -0.3572 | 0.4483 | 0.4350 | 0.0227  | 0.0240 | 0.3567 | 38.3063 | 0.0119 | 5.5220  |
| IschemicStroke | genus. unknowngenus. id. 2001       | Weighted median           | 22 | 0.0226  | 0.1037 | 0.8275 | 0.0227  | 0.0240 | 0.3567 | 38.3063 | 0.0119 | 5.5220  |
| IschemicStroke | genus. unknowngenus. id. 2001       | Inverse variance weighted | 22 | 0.0559  | 0.0960 | 0.5600 | 0.0227  | 0.0240 | 0.3567 | 38.3063 | 0.0119 | 5.5220  |
| IschemicStroke | genus. unknowngenus. id. 2001       | Simple mode               | 22 | 0.2921  | 0.2063 | 0.1716 | 0.0227  | 0.0240 | 0.3567 | 38.3063 | 0.0119 | 5.5220  |
| IschemicStroke | genus. unknowngenus. id. 2001       | Weighted mode             | 22 | 0.2653  | 0.2109 | 0.2223 | 0.0227  | 0.0240 | 0.3567 | 38.3063 | 0.0119 | 5.5220  |
| IschemicStroke | genus. unknowngenus. id. 2041       | MR Egger                  | 22 | -0.6332 | 0.3702 | 0.1026 | 0.0323  | 0.0198 | 0.1195 | 19.9362 | 0.5253 | 9.3645  |
| IschemicStroke | genus. unknowngenus. id. 2041       | Weighted median           | 22 | -0.0726 | 0.1087 | 0.5044 | 0.0323  | 0.0198 | 0.1195 | 19.9362 | 0.5253 | 9.3645  |
| IschemicStroke | genus. unknowngenus. id. 2041       | Inverse variance weighted | 22 | -0.0451 | 0.0794 | 0.5698 | 0.0323  | 0.0198 | 0.1195 | 19.9362 | 0.5253 | 9.3645  |
| IschemicStroke | genus. unknowngenus. id. 2041       | Simple mode               | 22 | -0.1008 | 0.1853 | 0.5922 | 0.0323  | 0.0198 | 0.1195 | 19.9362 | 0.5253 | 9.3645  |
| IschemicStroke | genus. unknowngenus. id. 2041       | Weighted mode             | 22 | -0.0956 | 0.1604 | 0.5577 | 0.0323  | 0.0198 | 0.1195 | 19.9362 | 0.5253 | 9.3645  |
| IschemicStroke | genus. unknowngenus. id. 2071       | MR Egger                  | 22 | 0.2582  | 0.2956 | 0.3928 | -0.0112 | 0.0158 | 0.4895 | 14.7207 | 0.7922 | 12.8970 |
| IschemicStroke | genus. unknowngenus. id. 2071       | Weighted median           | 22 | 0.0889  | 0.0914 | 0.3305 | -0.0112 | 0.0158 | 0.4895 | 14.7207 | 0.7922 | 12.8970 |
| IschemicStroke | genus. unknowngenus. id. 2071       | Inverse variance weighted | 22 | 0.0550  | 0.0635 | 0.3871 | -0.0112 | 0.0158 | 0.4895 | 14.7207 | 0.7922 | 12.8970 |
| IschemicStroke | genus. unknowngenus. id. 2071       | Simple mode               | 22 | 0.1899  | 0.1689 | 0.2736 | -0.0112 | 0.0158 | 0.4895 | 14.7207 | 0.7922 | 12.8970 |
| IschemicStroke | genus. unknowngenus. id. 2071       | Weighted mode             | 22 | 0.1973  | 0.1670 | 0.2505 | -0.0112 | 0.0158 | 0.4895 | 14.7207 | 0.7922 | 12.8970 |
| IschemicStroke | genus. unknowngenus. id. 2755       | MR Egger                  | 22 | -0.1585 | 0.3583 | 0.6629 | 0.0057  | 0.0192 | 0.7693 | 16.7273 | 0.6706 | 10.9554 |
| IschemicStroke | genus. unknowngenus. id. 2755       | Weighted median           | 22 | 0.0217  | 0.1043 | 0.8356 | 0.0057  | 0.0192 | 0.7693 | 16.7273 | 0.6706 | 10.9554 |
| IschemicStroke | genus. unknowngenus. id. 2755       | Inverse variance weighted | 22 | -0.0545 | 0.0768 | 0.4783 | 0.0057  | 0.0192 | 0.7693 | 16.7273 | 0.6706 | 10.9554 |
| IschemicStroke | genus. unknowngenus. id. 2755       | Simple mode               | 22 | 0.0454  | 0.1863 | 0.8098 | 0.0057  | 0.0192 | 0.7693 | 16.7273 | 0.6706 | 10.9554 |
| IschemicStroke | genus. unknowngenus. id. 2755       | Weighted mode             | 22 | 0.0607  | 0.1805 | 0.7401 | 0.0057  | 0.0192 | 0.7693 | 16.7273 | 0.6706 | 10.9554 |
| IschemicStroke | genus. unknowngenus. id. 826        | MR Egger                  | 22 | -0.1493 | 0.3097 | 0.6349 | 0.0064  | 0.0166 | 0.7047 | 23.3404 | 0.2724 | 11.2134 |
| IschemicStroke | genus. unknowngenus. id. 826        | Weighted median           | 22 | -0.0365 | 0.0890 | 0.6818 | 0.0064  | 0.0166 | 0.7047 | 23.3404 | 0.2724 | 11.2134 |
| IschemicStroke | genus. unknowngenus. id. 826        | Inverse variance weighted | 22 | -0.0330 | 0.0652 | 0.6122 | 0.0064  | 0.0166 | 0.7047 | 23.3404 | 0.2724 | 11.2134 |
| IschemicStroke | genus. unknowngenus. id. 826        | Simple mode               | 22 | -0.0303 | 0.1671 | 0.8579 | 0.0064  | 0.0166 | 0.7047 | 23.3404 | 0.2724 | 11.2134 |
| IschemicStroke | genus. unknowngenus. id. 826        | Weighted mode             | 22 | -0.0344 | 0.1512 | 0.8220 | 0.0064  | 0.0166 | 0.7047 | 23.3404 | 0.2724 | 11.2134 |
| IschemicStroke | genus. unknowngenus. id. 959        | MR Egger                  | 22 | -0.3598 | 0.4865 | 0.4682 | 0.0157  | 0.0261 | 0.5528 | 6.7467  | 0.9974 | 9.7648  |
| IschemicStroke | genus. unknowngenus. id. 959        | Weighted median           | 22 | -0.1154 | 0.1321 | 0.3820 | 0.0157  | 0.0261 | 0.5528 | 6.7467  | 0.9974 | 9.7648  |
| IschemicStroke | genus. unknowngenus. id. 959        | Inverse variance weighted | 22 | -0.0728 | 0.1044 | 0.4855 | 0.0157  | 0.0261 | 0.5528 | 6.7467  | 0.9974 | 9.7648  |
| IschemicStroke | genus. unknowngenus. id. 959        | Simple mode               | 22 | -0.0944 | 0.2234 | 0.6769 | 0.0157  | 0.0261 | 0.5528 | 6.7467  | 0.9974 | 9.7648  |

|                |                                      |                           |    |         |        |        |         |        |        |         |        |         |
|----------------|--------------------------------------|---------------------------|----|---------|--------|--------|---------|--------|--------|---------|--------|---------|
| IschemicStroke | genus. unknowngenus. id. 959         | Weighted mode             | 22 | -0.0778 | 0.2109 | 0.7159 | 0.0157  | 0.0261 | 0.5528 | 6.7467  | 0.9974 | 9.7648  |
| IschemicStroke | order. Actinomycetales. id. 420      | MR Egger                  | 22 | 0.0141  | 0.3964 | 0.9719 | -0.0044 | 0.0213 | 0.8374 | 22.3570 | 0.3215 | 7.1454  |
| IschemicStroke | order. Actinomycetales. id. 420      | Weighted median           | 22 | -0.0025 | 0.1158 | 0.9829 | -0.0044 | 0.0213 | 0.8374 | 22.3570 | 0.3215 | 7.1454  |
| IschemicStroke | order. Actinomycetales. id. 420      | Inverse variance weighted | 22 | -0.0664 | 0.0831 | 0.4246 | -0.0044 | 0.0213 | 0.8374 | 22.3570 | 0.3215 | 7.1454  |
| IschemicStroke | order. Actinomycetales. id. 420      | Simple mode               | 22 | -0.0572 | 0.1909 | 0.7675 | -0.0044 | 0.0213 | 0.8374 | 22.3570 | 0.3215 | 7.1454  |
| IschemicStroke | order. Actinomycetales. id. 420      | Weighted mode             | 22 | -0.0256 | 0.1789 | 0.8878 | -0.0044 | 0.0213 | 0.8374 | 22.3570 | 0.3215 | 7.1454  |
| IschemicStroke | order. Bacillales. id. 1674          | MR Egger                  | 20 | 0.0206  | 0.6510 | 0.9751 | 0.0101  | 0.0341 | 0.7717 | 15.4099 | 0.6337 | 4.2111  |
| IschemicStroke | order. Bacillales. id. 1674          | Weighted median           | 20 | 0.0918  | 0.1741 | 0.5980 | 0.0101  | 0.0341 | 0.7717 | 15.4099 | 0.6337 | 4.2111  |
| IschemicStroke | order. Bacillales. id. 1674          | Inverse variance weighted | 20 | 0.2085  | 0.1312 | 0.1122 | 0.0101  | 0.0341 | 0.7717 | 15.4099 | 0.6337 | 4.2111  |
| IschemicStroke | order. Bacillales. id. 1674          | Simple mode               | 20 | -0.0270 | 0.3177 | 0.9333 | 0.0101  | 0.0341 | 0.7717 | 15.4099 | 0.6337 | 4.2111  |
| IschemicStroke | order. Bacillales. id. 1674          | Weighted mode             | 20 | -0.0270 | 0.3045 | 0.9304 | 0.0101  | 0.0341 | 0.7717 | 15.4099 | 0.6337 | 4.2111  |
| IschemicStroke | order. Bacteroidales. id. 913        | MR Egger                  | 22 | 0.5322  | 0.2455 | 0.0424 | -0.0274 | 0.0132 | 0.0508 | 20.3720 | 0.4978 | 15.3097 |
| IschemicStroke | order. Bacteroidales. id. 913        | Weighted median           | 22 | -0.0201 | 0.0749 | 0.7879 | -0.0274 | 0.0132 | 0.0508 | 20.3720 | 0.4978 | 15.3097 |
| IschemicStroke | order. Bacteroidales. id. 913        | Inverse variance weighted | 22 | 0.0339  | 0.0528 | 0.5207 | -0.0274 | 0.0132 | 0.0508 | 20.3720 | 0.4978 | 15.3097 |
| IschemicStroke | order. Bacteroidales. id. 913        | Simple mode               | 22 | -0.1569 | 0.1490 | 0.3044 | -0.0274 | 0.0132 | 0.0508 | 20.3720 | 0.4978 | 15.3097 |
| IschemicStroke | order. Bacteroidales. id. 913        | Weighted mode             | 22 | -0.0944 | 0.1483 | 0.5315 | -0.0274 | 0.0132 | 0.0508 | 20.3720 | 0.4978 | 15.3097 |
| IschemicStroke | order. Bifidobacteriales. id. 432    | MR Egger                  | 22 | 0.1578  | 0.3409 | 0.6483 | -0.0081 | 0.0183 | 0.6630 | 31.3844 | 0.0503 | 8.0633  |
| IschemicStroke | order. Bifidobacteriales. id. 432    | Weighted median           | 22 | 0.0601  | 0.0818 | 0.4625 | -0.0081 | 0.0183 | 0.6630 | 31.3844 | 0.0503 | 8.0633  |
| IschemicStroke | order. Bifidobacteriales. id. 432    | Inverse variance weighted | 22 | 0.0106  | 0.0719 | 0.8827 | -0.0081 | 0.0183 | 0.6630 | 31.3844 | 0.0503 | 8.0633  |
| IschemicStroke | order. Bifidobacteriales. id. 432    | Simple mode               | 22 | 0.0687  | 0.1301 | 0.6029 | -0.0081 | 0.0183 | 0.6630 | 31.3844 | 0.0503 | 8.0633  |
| IschemicStroke | order. Bifidobacteriales. id. 432    | Weighted mode             | 22 | 0.0735  | 0.1077 | 0.5026 | -0.0081 | 0.0183 | 0.6630 | 31.3844 | 0.0503 | 8.0633  |
| IschemicStroke | order. Burkholderiales. id. 2874     | MR Egger                  | 22 | -0.2718 | 0.2543 | 0.2978 | 0.0173  | 0.0136 | 0.2180 | 16.2721 | 0.7542 | 15.5757 |
| IschemicStroke | order. Burkholderiales. id. 2874     | Weighted median           | 22 | 0.0735  | 0.0750 | 0.3269 | 0.0173  | 0.0136 | 0.2180 | 16.2721 | 0.7542 | 15.5757 |
| IschemicStroke | order. Burkholderiales. id. 2874     | Inverse variance weighted | 22 | 0.0441  | 0.0547 | 0.4203 | 0.0173  | 0.0136 | 0.2180 | 16.2721 | 0.7542 | 15.5757 |
| IschemicStroke | order. Burkholderiales. id. 2874     | Simple mode               | 22 | 0.0754  | 0.1389 | 0.5928 | 0.0173  | 0.0136 | 0.2180 | 16.2721 | 0.7542 | 15.5757 |
| IschemicStroke | order. Burkholderiales. id. 2874     | Weighted mode             | 22 | 0.0956  | 0.1418 | 0.5077 | 0.0173  | 0.0136 | 0.2180 | 16.2721 | 0.7542 | 15.5757 |
| IschemicStroke | order. Clostridiales. id. 1863       | MR Egger                  | 22 | -0.3823 | 0.2455 | 0.1351 | 0.0183  | 0.0132 | 0.1798 | 15.5020 | 0.7969 | 17.5157 |
| IschemicStroke | order. Clostridiales. id. 1863       | Weighted median           | 22 | -0.1355 | 0.0715 | 0.0580 | 0.0183  | 0.0132 | 0.1798 | 15.5020 | 0.7969 | 17.5157 |
| IschemicStroke | order. Clostridiales. id. 1863       | Inverse variance weighted | 22 | -0.0490 | 0.0528 | 0.3529 | 0.0183  | 0.0132 | 0.1798 | 15.5020 | 0.7969 | 17.5157 |
| IschemicStroke | order. Clostridiales. id. 1863       | Simple mode               | 22 | -0.2094 | 0.1444 | 0.1620 | 0.0183  | 0.0132 | 0.1798 | 15.5020 | 0.7969 | 17.5157 |
| IschemicStroke | order. Clostridiales. id. 1863       | Weighted mode             | 22 | -0.2068 | 0.1227 | 0.1066 | 0.0183  | 0.0132 | 0.1798 | 15.5020 | 0.7969 | 17.5157 |
| IschemicStroke | order. Coriobacteriales. id. 810     | MR Egger                  | 22 | 0.1125  | 0.2584 | 0.6678 | -0.0070 | 0.0139 | 0.6180 | 21.4683 | 0.3700 | 15.3068 |
| IschemicStroke | order. Coriobacteriales. id. 810     | Weighted median           | 22 | -0.0146 | 0.0743 | 0.8441 | -0.0070 | 0.0139 | 0.6180 | 21.4683 | 0.3700 | 15.3068 |
| IschemicStroke | order. Coriobacteriales. id. 810     | Inverse variance weighted | 22 | -0.0153 | 0.0546 | 0.7797 | -0.0070 | 0.0139 | 0.6180 | 21.4683 | 0.3700 | 15.3068 |
| IschemicStroke | order. Coriobacteriales. id. 810     | Simple mode               | 22 | -0.0509 | 0.1263 | 0.6910 | -0.0070 | 0.0139 | 0.6180 | 21.4683 | 0.3700 | 15.3068 |
| IschemicStroke | order. Coriobacteriales. id. 810     | Weighted mode             | 22 | -0.0057 | 0.1085 | 0.9583 | -0.0070 | 0.0139 | 0.6180 | 21.4683 | 0.3700 | 15.3068 |
| IschemicStroke | order. Desulfovibrionales. id. 3156  | MR Egger                  | 22 | 0.0277  | 0.3242 | 0.9329 | -0.0058 | 0.0174 | 0.7411 | 28.8535 | 0.0907 | 11.8596 |
| IschemicStroke | order. Desulfovibrionales. id. 3156  | Weighted median           | 22 | -0.0702 | 0.0855 | 0.4113 | -0.0058 | 0.0174 | 0.7411 | 28.8535 | 0.0907 | 11.8596 |
| IschemicStroke | order. Desulfovibrionales. id. 3156  | Inverse variance weighted | 22 | -0.0784 | 0.0682 | 0.2503 | -0.0058 | 0.0174 | 0.7411 | 28.8535 | 0.0907 | 11.8596 |
| IschemicStroke | order. Desulfovibrionales. id. 3156  | Simple mode               | 22 | -0.0662 | 0.1647 | 0.6919 | -0.0058 | 0.0174 | 0.7411 | 28.8535 | 0.0907 | 11.8596 |
| IschemicStroke | order. Desulfovibrionales. id. 3156  | Weighted mode             | 22 | -0.0617 | 0.1481 | 0.6813 | -0.0058 | 0.0174 | 0.7411 | 28.8535 | 0.0907 | 11.8596 |
| IschemicStroke | order. Enterobacteriales. id. 3468   | MR Egger                  | 22 | -0.1729 | 0.2856 | 0.5517 | 0.0069  | 0.0153 | 0.6594 | 16.5940 | 0.6792 | 14.7997 |
| IschemicStroke | order. Enterobacteriales. id. 3468   | Weighted median           | 22 | -0.0949 | 0.0879 | 0.2800 | 0.0069  | 0.0153 | 0.6594 | 16.5940 | 0.6792 | 14.7997 |
| IschemicStroke | order. Enterobacteriales. id. 3468   | Inverse variance weighted | 22 | -0.0481 | 0.0615 | 0.4335 | 0.0069  | 0.0153 | 0.6594 | 16.5940 | 0.6792 | 14.7997 |
| IschemicStroke | order. Enterobacteriales. id. 3468   | Simple mode               | 22 | -0.1564 | 0.1821 | 0.4001 | 0.0069  | 0.0153 | 0.6594 | 16.5940 | 0.6792 | 14.7997 |
| IschemicStroke | order. Enterobacteriales. id. 3468   | Weighted mode             | 22 | -0.1495 | 0.1732 | 0.3976 | 0.0069  | 0.0153 | 0.6594 | 16.5940 | 0.6792 | 14.7997 |
| IschemicStroke | order. Erysipelotrichales. id. 2148  | MR Egger                  | 22 | -0.0800 | 0.3375 | 0.8151 | 0.0039  | 0.0181 | 0.8311 | 37.5761 | 0.0100 | 9.0097  |
| IschemicStroke | order. Erysipelotrichales. id. 2148  | Weighted median           | 22 | 0.0089  | 0.0831 | 0.9149 | 0.0039  | 0.0181 | 0.8311 | 37.5761 | 0.0100 | 9.0097  |
| IschemicStroke | order. Erysipelotrichales. id. 2148  | Inverse variance weighted | 22 | -0.0088 | 0.0709 | 0.9014 | 0.0039  | 0.0181 | 0.8311 | 37.5761 | 0.0100 | 9.0097  |
| IschemicStroke | order. Erysipelotrichales. id. 2148  | Simple mode               | 22 | -0.0217 | 0.1764 | 0.9034 | 0.0039  | 0.0181 | 0.8311 | 37.5761 | 0.0100 | 9.0097  |
| IschemicStroke | order. Erysipelotrichales. id. 2148  | Weighted mode             | 22 | 0.0184  | 0.1517 | 0.9045 | 0.0039  | 0.0181 | 0.8311 | 37.5761 | 0.0100 | 9.0097  |
| IschemicStroke | order. Gastranaerophilales. id. 1591 | MR Egger                  | 22 | -0.6820 | 0.4312 | 0.1294 | 0.0349  | 0.0231 | 0.1468 | 15.6475 | 0.7891 | 7.1671  |
| IschemicStroke | order. Gastranaerophilales. id. 1591 | Weighted median           | 22 | -0.0669 | 0.1277 | 0.6004 | 0.0349  | 0.0231 | 0.1468 | 15.6475 | 0.7891 | 7.1671  |
| IschemicStroke | order. Gastranaerophilales. id. 1591 | Inverse variance weighted | 22 | -0.0463 | 0.0925 | 0.6166 | 0.0349  | 0.0231 | 0.1468 | 15.6475 | 0.7891 | 7.1671  |
| IschemicStroke | order. Gastranaerophilales. id. 1591 | Simple mode               | 22 | 0.3021  | 0.2438 | 0.2289 | 0.0349  | 0.0231 | 0.1468 | 15.6475 | 0.7891 | 7.1671  |
| IschemicStroke | order. Gastranaerophilales. id. 1591 | Weighted mode             | 22 | -0.3119 | 0.2463 | 0.2193 | 0.0349  | 0.0231 | 0.1468 | 15.6475 | 0.7891 | 7.1671  |
| IschemicStroke | order. Lactobacillales. id. 1800     | MR Egger                  | 22 | -0.1437 | 0.2527 | 0.5759 | 0.0109  | 0.0136 | 0.4313 | 17.1773 | 0.6414 | 17.3552 |
| IschemicStroke | order. Lactobacillales. id. 1800     | Weighted median           | 22 | 0.0969  | 0.0795 | 0.2229 | 0.0109  | 0.0136 | 0.4313 | 17.1773 | 0.6414 | 17.3552 |

|                |                                     |                           |    |         |        |        |         |        |        |         |        |         |
|----------------|-------------------------------------|---------------------------|----|---------|--------|--------|---------|--------|--------|---------|--------|---------|
| IschemicStroke | order. Lactobacillales. id. 1800    | Inverse variance weighted | 22 | 0.0545  | 0.0543 | 0.3157 | 0.0109  | 0.0136 | 0.4313 | 17.1773 | 0.6414 | 17.3552 |
| IschemicStroke | order. Lactobacillales. id. 1800    | Simple mode               | 22 | -0.1547 | 0.1546 | 0.3284 | 0.0109  | 0.0136 | 0.4313 | 17.1773 | 0.6414 | 17.3552 |
| IschemicStroke | order. Lactobacillales. id. 1800    | Weighted mode             | 22 | -0.1329 | 0.1431 | 0.3637 | 0.0109  | 0.0136 | 0.4313 | 17.1773 | 0.6414 | 17.3552 |
| IschemicStroke | order. Methanobacteriales. id. 120  | MR Egger                  | 22 | 0.6358  | 0.5466 | 0.2584 | -0.0325 | 0.0293 | 0.2802 | 15.1870 | 0.8135 | 5.4478  |
| IschemicStroke | order. Methanobacteriales. id. 120  | Weighted median           | 22 | 0.0028  | 0.1617 | 0.9864 | -0.0325 | 0.0293 | 0.2802 | 15.1870 | 0.8135 | 5.4478  |
| IschemicStroke | order. Methanobacteriales. id. 120  | Inverse variance weighted | 22 | 0.0432  | 0.1169 | 0.7117 | -0.0325 | 0.0293 | 0.2802 | 15.1870 | 0.8135 | 5.4478  |
| IschemicStroke | order. Methanobacteriales. id. 120  | Simple mode               | 22 | -0.1240 | 0.2870 | 0.6702 | -0.0325 | 0.0293 | 0.2802 | 15.1870 | 0.8135 | 5.4478  |
| IschemicStroke | order. Methanobacteriales. id. 120  | Weighted mode             | 22 | -0.0130 | 0.2673 | 0.9618 | -0.0325 | 0.0293 | 0.2802 | 15.1870 | 0.8135 | 5.4478  |
| IschemicStroke | order. MollicutesRF9. id. 11579     | MR Egger                  | 22 | 0.5313  | 0.3477 | 0.1422 | -0.0328 | 0.0186 | 0.0936 | 26.3462 | 0.1936 | 9.0704  |
| IschemicStroke | order. MollicutesRF9. id. 11579     | Weighted median           | 22 | -0.0650 | 0.1056 | 0.5383 | -0.0328 | 0.0186 | 0.0936 | 26.3462 | 0.1936 | 9.0704  |
| IschemicStroke | order. MollicutesRF9. id. 11579     | Inverse variance weighted | 22 | -0.0665 | 0.0784 | 0.3962 | -0.0328 | 0.0186 | 0.0936 | 26.3462 | 0.1936 | 9.0704  |
| IschemicStroke | order. MollicutesRF9. id. 11579     | Simple mode               | 22 | -0.0735 | 0.1992 | 0.7158 | -0.0328 | 0.0186 | 0.0936 | 26.3462 | 0.1936 | 9.0704  |
| IschemicStroke | order. MollicutesRF9. id. 11579     | Weighted mode             | 22 | -0.0930 | 0.1829 | 0.6165 | -0.0328 | 0.0186 | 0.0936 | 26.3462 | 0.1936 | 9.0704  |
| IschemicStroke | order. NBIn. id. 3953               | MR Egger                  | 22 | -0.8215 | 0.6032 | 0.1884 | 0.0406  | 0.0324 | 0.2240 | 37.0129 | 0.0168 | 3.7515  |
| IschemicStroke | order. NBIn. id. 3953               | Weighted median           | 22 | -0.0518 | 0.1482 | 0.7265 | 0.0406  | 0.0324 | 0.2240 | 37.0129 | 0.0168 | 3.7515  |
| IschemicStroke | order. NBIn. id. 3953               | Inverse variance weighted | 22 | -0.0823 | 0.1312 | 0.5307 | 0.0406  | 0.0324 | 0.2240 | 37.0129 | 0.0168 | 3.7515  |
| IschemicStroke | order. NBIn. id. 3953               | Simple mode               | 22 | -0.0443 | 0.2787 | 0.8753 | 0.0406  | 0.0324 | 0.2240 | 37.0129 | 0.0168 | 3.7515  |
| IschemicStroke | order. NBIn. id. 3953               | Weighted mode             | 22 | -0.0682 | 0.2717 | 0.8043 | 0.0406  | 0.0324 | 0.2240 | 37.0129 | 0.0168 | 3.7515  |
| IschemicStroke | order. Pasteurellales. id. 3688     | MR Egger                  | 22 | 0.5744  | 0.3437 | 0.1103 | -0.0275 | 0.0184 | 0.1516 | 14.9125 | 0.8273 | 12.5861 |
| IschemicStroke | order. Pasteurellales. id. 3688     | Weighted median           | 22 | 0.0919  | 0.1005 | 0.3602 | -0.0275 | 0.0184 | 0.1516 | 14.9125 | 0.8273 | 12.5861 |
| IschemicStroke | order. Pasteurellales. id. 3688     | Inverse variance weighted | 22 | 0.0739  | 0.0739 | 0.3175 | -0.0275 | 0.0184 | 0.1516 | 14.9125 | 0.8273 | 12.5861 |
| IschemicStroke | order. Pasteurellales. id. 3688     | Simple mode               | 22 | 0.1354  | 0.1716 | 0.4390 | -0.0275 | 0.0184 | 0.1516 | 14.9125 | 0.8273 | 12.5861 |
| IschemicStroke | order. Pasteurellales. id. 3688     | Weighted mode             | 22 | 0.0999  | 0.1610 | 0.5418 | -0.0275 | 0.0184 | 0.1516 | 14.9125 | 0.8273 | 12.5861 |
| IschemicStroke | order. Rhodospirillales. id. 2667   | MR Egger                  | 22 | -0.1050 | 0.3559 | 0.7710 | 0.0035  | 0.0191 | 0.8561 | 16.8599 | 0.6621 | 11.2324 |
| IschemicStroke | order. Rhodospirillales. id. 2667   | Weighted median           | 22 | 0.0349  | 0.1051 | 0.7397 | 0.0035  | 0.0191 | 0.8561 | 16.8599 | 0.6621 | 11.2324 |
| IschemicStroke | order. Rhodospirillales. id. 2667   | Inverse variance weighted | 22 | -0.0411 | 0.0764 | 0.5900 | 0.0035  | 0.0191 | 0.8561 | 16.8599 | 0.6621 | 11.2324 |
| IschemicStroke | order. Rhodospirillales. id. 2667   | Simple mode               | 22 | 0.0336  | 0.1750 | 0.8495 | 0.0035  | 0.0191 | 0.8561 | 16.8599 | 0.6621 | 11.2324 |
| IschemicStroke | order. Rhodospirillales. id. 2667   | Weighted mode             | 22 | 0.0440  | 0.1790 | 0.8083 | 0.0035  | 0.0191 | 0.8561 | 16.8599 | 0.6621 | 11.2324 |
| IschemicStroke | order. Selenomonadales. id. 2165    | MR Egger                  | 22 | 0.3092  | 0.2466 | 0.2243 | -0.0191 | 0.0132 | 0.1633 | 13.6508 | 0.8841 | 21.3849 |
| IschemicStroke | order. Selenomonadales. id. 2165    | Weighted median           | 22 | -0.0147 | 0.0753 | 0.8456 | -0.0191 | 0.0132 | 0.1633 | 13.6508 | 0.8841 | 21.3849 |
| IschemicStroke | order. Selenomonadales. id. 2165    | Inverse variance weighted | 22 | -0.0393 | 0.0530 | 0.4582 | -0.0191 | 0.0132 | 0.1633 | 13.6508 | 0.8841 | 21.3849 |
| IschemicStroke | order. Selenomonadales. id. 2165    | Simple mode               | 22 | 0.0250  | 0.1292 | 0.8485 | -0.0191 | 0.0132 | 0.1633 | 13.6508 | 0.8841 | 21.3849 |
| IschemicStroke | order. Selenomonadales. id. 2165    | Weighted mode             | 22 | -0.0459 | 0.1181 | 0.7014 | -0.0191 | 0.0132 | 0.1633 | 13.6508 | 0.8841 | 21.3849 |
| IschemicStroke | order. Verrucomicrobiales. id. 4030 | MR Egger                  | 22 | 0.2318  | 0.3032 | 0.4536 | -0.0141 | 0.0163 | 0.3966 | 17.2073 | 0.6395 | 13.1923 |
| IschemicStroke | order. Verrucomicrobiales. id. 4030 | Weighted median           | 22 | 0.0030  | 0.0923 | 0.9737 | -0.0141 | 0.0163 | 0.3966 | 17.2073 | 0.6395 | 13.1923 |
| IschemicStroke | order. Verrucomicrobiales. id. 4030 | Inverse variance weighted | 22 | -0.0247 | 0.0652 | 0.7042 | -0.0141 | 0.0163 | 0.3966 | 17.2073 | 0.6395 | 13.1923 |
| IschemicStroke | order. Verrucomicrobiales. id. 4030 | Simple mode               | 22 | -0.0245 | 0.1730 | 0.8886 | -0.0141 | 0.0163 | 0.3966 | 17.2073 | 0.6395 | 13.1923 |
| IschemicStroke | order. Verrucomicrobiales. id. 4030 | Weighted mode             | 22 | -0.0125 | 0.1578 | 0.9377 | -0.0141 | 0.0163 | 0.3966 | 17.2073 | 0.6395 | 13.1923 |
| IschemicStroke | order. Victivallales. id. 2254      | MR Egger                  | 22 | -0.0163 | 0.4958 | 0.9741 | -0.0095 | 0.0266 | 0.7257 | 21.1380 | 0.3891 | 4.1294  |
| IschemicStroke | order. Victivallales. id. 2254      | Weighted median           | 22 | -0.1350 | 0.1492 | 0.3655 | -0.0095 | 0.0266 | 0.7257 | 21.1380 | 0.3891 | 4.1294  |
| IschemicStroke | order. Victivallales. id. 2254      | Inverse variance weighted | 22 | -0.1886 | 0.1041 | 0.0700 | -0.0095 | 0.0266 | 0.7257 | 21.1380 | 0.3891 | 4.1294  |
| IschemicStroke | order. Victivallales. id. 2254      | Simple mode               | 22 | -0.1414 | 0.3115 | 0.6546 | -0.0095 | 0.0266 | 0.7257 | 21.1380 | 0.3891 | 4.1294  |
| IschemicStroke | order. Victivallales. id. 2254      | Weighted mode             | 22 | -0.1070 | 0.2767 | 0.7029 | -0.0095 | 0.0266 | 0.7257 | 21.1380 | 0.3891 | 4.1294  |
| IschemicStroke | phylum. Actinobacteria. id. 400     | MR Egger                  | 22 | 0.1251  | 0.3035 | 0.6846 | -0.0083 | 0.0163 | 0.6175 | 30.0596 | 0.0689 | 11.0168 |
| IschemicStroke | phylum. Actinobacteria. id. 400     | Weighted median           | 22 | 0.0245  | 0.0794 | 0.7575 | -0.0083 | 0.0163 | 0.6175 | 30.0596 | 0.0689 | 11.0168 |
| IschemicStroke | phylum. Actinobacteria. id. 400     | Inverse variance weighted | 22 | -0.0253 | 0.0641 | 0.6937 | -0.0083 | 0.0163 | 0.6175 | 30.0596 | 0.0689 | 11.0168 |
| IschemicStroke | phylum. Actinobacteria. id. 400     | Simple mode               | 22 | -0.1808 | 0.1359 | 0.1975 | -0.0083 | 0.0163 | 0.6175 | 30.0596 | 0.0689 | 11.0168 |
| IschemicStroke | phylum. Actinobacteria. id. 400     | Weighted mode             | 22 | 0.0308  | 0.1118 | 0.7853 | -0.0083 | 0.0163 | 0.6175 | 30.0596 | 0.0689 | 11.0168 |
| IschemicStroke | phylum. Bacteroidetes. id. 905      | MR Egger                  | 22 | 0.5405  | 0.2455 | 0.0396 | -0.0278 | 0.0132 | 0.0474 | 21.4207 | 0.4335 | 14.8186 |
| IschemicStroke | phylum. Bacteroidetes. id. 905      | Weighted median           | 22 | -0.0109 | 0.0751 | 0.8845 | -0.0278 | 0.0132 | 0.0474 | 21.4207 | 0.4335 | 14.8186 |
| IschemicStroke | phylum. Bacteroidetes. id. 905      | Inverse variance weighted | 22 | 0.0339  | 0.0533 | 0.5253 | -0.0278 | 0.0132 | 0.0474 | 21.4207 | 0.4335 | 14.8186 |
| IschemicStroke | phylum. Bacteroidetes. id. 905      | Simple mode               | 22 | -0.1768 | 0.1490 | 0.2486 | -0.0278 | 0.0132 | 0.0474 | 21.4207 | 0.4335 | 14.8186 |
| IschemicStroke | phylum. Bacteroidetes. id. 905      | Weighted mode             | 22 | -0.1133 | 0.1350 | 0.4108 | -0.0278 | 0.0132 | 0.0474 | 21.4207 | 0.4335 | 14.8186 |
| IschemicStroke | phylum. Cyanobacteria. id. 1500     | MR Egger                  | 22 | -0.8677 | 0.3923 | 0.0388 | 0.0424  | 0.0210 | 0.0573 | 18.7131 | 0.6035 | 7.2022  |
| IschemicStroke | phylum. Cyanobacteria. id. 1500     | Weighted median           | 22 | -0.1349 | 0.1194 | 0.2584 | 0.0424  | 0.0210 | 0.0573 | 18.7131 | 0.6035 | 7.2022  |
| IschemicStroke | phylum. Cyanobacteria. id. 1500     | Inverse variance weighted | 22 | -0.0947 | 0.0842 | 0.2605 | 0.0424  | 0.0210 | 0.0573 | 18.7131 | 0.6035 | 7.2022  |
| IschemicStroke | phylum. Cyanobacteria. id. 1500     | Simple mode               | 22 | -0.1420 | 0.2489 | 0.5745 | 0.0424  | 0.0210 | 0.0573 | 18.7131 | 0.6035 | 7.2022  |
| IschemicStroke | phylum. Cyanobacteria. id. 1500     | Weighted mode             | 22 | -0.1605 | 0.2446 | 0.5187 | 0.0424  | 0.0210 | 0.0573 | 18.7131 | 0.6035 | 7.2022  |

|                   |                                      |                           |    |         |        |        |         |        |        |         |        |          |
|-------------------|--------------------------------------|---------------------------|----|---------|--------|--------|---------|--------|--------|---------|--------|----------|
| IschemicStroke    | phylum. Euryarchaeota. id. 55        | MR Egger                  | 22 | 0.5929  | 0.5350 | 0.2810 | -0.0303 | 0.0287 | 0.3042 | 17.9019 | 0.6552 | 4.6548   |
| IschemicStroke    | phylum. Euryarchaeota. id. 55        | Weighted median           | 22 | -0.0790 | 0.1558 | 0.6122 | -0.0303 | 0.0287 | 0.3042 | 17.9019 | 0.6552 | 4.6548   |
| IschemicStroke    | phylum. Euryarchaeota. id. 55        | Inverse variance weighted | 22 | 0.0418  | 0.1145 | 0.7153 | -0.0303 | 0.0287 | 0.3042 | 17.9019 | 0.6552 | 4.6548   |
| IschemicStroke    | phylum. Euryarchaeota. id. 55        | Simple mode               | 22 | -0.1892 | 0.2950 | 0.5283 | -0.0303 | 0.0287 | 0.3042 | 17.9019 | 0.6552 | 4.6548   |
| IschemicStroke    | phylum. Euryarchaeota. id. 55        | Weighted mode             | 22 | -0.1150 | 0.2530 | 0.6541 | -0.0303 | 0.0287 | 0.3042 | 17.9019 | 0.6552 | 4.6548   |
| IschemicStroke    | phylum. Firmicutes. id. 1672         | MR Egger                  | 22 | -0.3576 | 0.2455 | 0.1608 | 0.0165  | 0.0132 | 0.2241 | 20.0492 | 0.5181 | 13.7799  |
| IschemicStroke    | phylum. Firmicutes. id. 1672         | Weighted median           | 22 | -0.0686 | 0.0763 | 0.3689 | 0.0165  | 0.0132 | 0.2241 | 20.0492 | 0.5181 | 13.7799  |
| IschemicStroke    | phylum. Firmicutes. id. 1672         | Inverse variance weighted | 22 | -0.0567 | 0.0528 | 0.2824 | 0.0165  | 0.0132 | 0.2241 | 20.0492 | 0.5181 | 13.7799  |
| IschemicStroke    | phylum. Firmicutes. id. 1672         | Simple mode               | 22 | -0.0127 | 0.1468 | 0.9317 | 0.0165  | 0.0132 | 0.2241 | 20.0492 | 0.5181 | 13.7799  |
| IschemicStroke    | phylum. Firmicutes. id. 1672         | Weighted mode             | 22 | -0.0977 | 0.1265 | 0.4487 | 0.0165  | 0.0132 | 0.2241 | 20.0492 | 0.5181 | 13.7799  |
| IschemicStroke    | phylum. Lentisphaerae. id. 2238      | MR Egger                  | 22 | 0.0176  | 0.4993 | 0.9722 | -0.0115 | 0.0268 | 0.6735 | 21.4511 | 0.3710 | 4.0415   |
| IschemicStroke    | phylum. Lentisphaerae. id. 2238      | Weighted median           | 22 | -0.1709 | 0.1461 | 0.2420 | -0.0115 | 0.0268 | 0.6735 | 21.4511 | 0.3710 | 4.0415   |
| IschemicStroke    | phylum. Lentisphaerae. id. 2238      | Inverse variance weighted | 22 | -0.1909 | 0.1050 | 0.0689 | -0.0115 | 0.0268 | 0.6735 | 21.4511 | 0.3710 | 4.0415   |
| IschemicStroke    | phylum. Lentisphaerae. id. 2238      | Simple mode               | 22 | -0.1968 | 0.3190 | 0.5438 | -0.0115 | 0.0268 | 0.6735 | 21.4511 | 0.3710 | 4.0415   |
| IschemicStroke    | phylum. Lentisphaerae. id. 2238      | Weighted mode             | 22 | -0.2037 | 0.2880 | 0.4873 | -0.0115 | 0.0268 | 0.6735 | 21.4511 | 0.3710 | 4.0415   |
| IschemicStroke    | phylum. Proteobacteria. id. 2375     | MR Egger                  | 22 | -0.4682 | 0.2707 | 0.0991 | 0.0250  | 0.0145 | 0.1007 | 27.7860 | 0.1463 | 13.0141  |
| IschemicStroke    | phylum. Proteobacteria. id. 2375     | Weighted median           | 22 | 0.0529  | 0.0784 | 0.4996 | 0.0250  | 0.0145 | 0.1007 | 27.7860 | 0.1463 | 13.0141  |
| IschemicStroke    | phylum. Proteobacteria. id. 2375     | Inverse variance weighted | 22 | -0.0132 | 0.0609 | 0.8282 | 0.0250  | 0.0145 | 0.1007 | 27.7860 | 0.1463 | 13.0141  |
| IschemicStroke    | phylum. Proteobacteria. id. 2375     | Simple mode               | 22 | 0.1329  | 0.1591 | 0.4131 | 0.0250  | 0.0145 | 0.1007 | 27.7860 | 0.1463 | 13.0141  |
| IschemicStroke    | phylum. Proteobacteria. id. 2375     | Weighted mode             | 22 | 0.1445  | 0.1517 | 0.3516 | 0.0250  | 0.0145 | 0.1007 | 27.7860 | 0.1463 | 13.0141  |
| IschemicStroke    | phylum. Tenericutes. id. 3919        | MR Egger                  | 22 | 0.1272  | 0.3630 | 0.7296 | -0.0117 | 0.0195 | 0.5556 | 27.3576 | 0.1255 | 8.5620   |
| IschemicStroke    | phylum. Tenericutes. id. 3919        | Weighted median           | 22 | -0.0417 | 0.0944 | 0.6584 | -0.0117 | 0.0195 | 0.5556 | 27.3576 | 0.1255 | 8.5620   |
| IschemicStroke    | phylum. Tenericutes. id. 3919        | Inverse variance weighted | 22 | -0.0852 | 0.0768 | 0.2671 | -0.0117 | 0.0195 | 0.5556 | 27.3576 | 0.1255 | 8.5620   |
| IschemicStroke    | phylum. Tenericutes. id. 3919        | Simple mode               | 22 | -0.0732 | 0.1778 | 0.6849 | -0.0117 | 0.0195 | 0.5556 | 27.3576 | 0.1255 | 8.5620   |
| IschemicStroke    | phylum. Tenericutes. id. 3919        | Weighted mode             | 22 | -0.0500 | 0.1944 | 0.7997 | -0.0117 | 0.0195 | 0.5556 | 27.3576 | 0.1255 | 8.5620   |
| IschemicStroke    | phylum. Verrucomicrobia. id. 3982    | MR Egger                  | 22 | 0.1253  | 0.2971 | 0.6777 | -0.0075 | 0.0159 | 0.6430 | 13.8036 | 0.8403 | 16.6965  |
| IschemicStroke    | phylum. Verrucomicrobia. id. 3982    | Weighted median           | 22 | 0.0163  | 0.0886 | 0.8539 | -0.0075 | 0.0159 | 0.6430 | 13.8036 | 0.8403 | 16.6965  |
| IschemicStroke    | phylum. Verrucomicrobia. id. 3982    | Inverse variance weighted | 22 | -0.0113 | 0.0639 | 0.8601 | -0.0075 | 0.0159 | 0.6430 | 13.8036 | 0.8403 | 16.6965  |
| IschemicStroke    | phylum. Verrucomicrobia. id. 3982    | Simple mode               | 22 | 0.1109  | 0.1705 | 0.5224 | -0.0075 | 0.0159 | 0.6430 | 13.8036 | 0.8403 | 16.6965  |
| IschemicStroke    | phylum. Verrucomicrobia. id. 3982    | Weighted mode             | 22 | 0.0924  | 0.1716 | 0.5957 | -0.0075 | 0.0159 | 0.6430 | 13.8036 | 0.8403 | 16.6965  |
| LargeArteryStroke | class. Actinobacteria. id. 419       | MR Egger                  | 3  | -2.1313 | 1.4839 | 0.3872 | 0.4869  | 0.3293 | 0.3786 | 2.1943  | 0.3338 | 87.7355  |
| LargeArteryStroke | class. Actinobacteria. id. 419       | Weighted median           | 3  | 0.0555  | 0.0687 | 0.4197 | 0.4869  | 0.3293 | 0.3786 | 2.1943  | 0.3338 | 87.7355  |
| LargeArteryStroke | class. Actinobacteria. id. 419       | Inverse variance weighted | 3  | 0.0613  | 0.0569 | 0.2807 | 0.4869  | 0.3293 | 0.3786 | 2.1943  | 0.3338 | 87.7355  |
| LargeArteryStroke | class. Actinobacteria. id. 419       | Simple mode               | 3  | 0.0239  | 0.0928 | 0.8209 | 0.4869  | 0.3293 | 0.3786 | 2.1943  | 0.3338 | 87.7355  |
| LargeArteryStroke | class. Actinobacteria. id. 419       | Weighted mode             | 3  | 0.0448  | 0.0876 | 0.6599 | 0.4869  | 0.3293 | 0.3786 | 2.1943  | 0.3338 | 87.7355  |
| LargeArteryStroke | class. Alphaproteobacteria. id. 2379 | MR Egger                  | 3  | -1.5131 | 1.9195 | 0.5750 | 0.3299  | 0.4255 | 0.5802 | 0.7609  | 0.6836 | 110.6130 |
| LargeArteryStroke | class. Alphaproteobacteria. id. 2379 | Weighted median           | 3  | 0.0002  | 0.0852 | 0.9984 | 0.3299  | 0.4255 | 0.5802 | 0.7609  | 0.6836 | 110.6130 |
| LargeArteryStroke | class. Alphaproteobacteria. id. 2379 | Inverse variance weighted | 3  | -0.0260 | 0.0707 | 0.7135 | 0.3299  | 0.4255 | 0.5802 | 0.7609  | 0.6836 | 110.6130 |
| LargeArteryStroke | class. Alphaproteobacteria. id. 2379 | Simple mode               | 3  | 0.0096  | 0.1003 | 0.9322 | 0.3299  | 0.4255 | 0.5802 | 0.7609  | 0.6836 | 110.6130 |
| LargeArteryStroke | class. Alphaproteobacteria. id. 2379 | Weighted mode             | 3  | 0.0110  | 0.0975 | 0.9207 | 0.3299  | 0.4255 | 0.5802 | 0.7609  | 0.6836 | 110.6130 |
| LargeArteryStroke | class. Bacilli. id. 1673             | MR Egger                  | 3  | -2.7175 | 1.5531 | 0.3305 | 0.5790  | 0.3446 | 0.3417 | 4.4461  | 0.1083 | 37.9000  |
| LargeArteryStroke | class. Bacilli. id. 1673             | Weighted median           | 3  | -0.0529 | 0.0710 | 0.4567 | 0.5790  | 0.3446 | 0.3417 | 4.4461  | 0.1083 | 37.9000  |
| LargeArteryStroke | class. Bacilli. id. 1673             | Inverse variance weighted | 3  | -0.1093 | 0.0787 | 0.1648 | 0.5790  | 0.3446 | 0.3417 | 4.4461  | 0.1083 | 37.9000  |
| LargeArteryStroke | class. Bacilli. id. 1673             | Simple mode               | 3  | -0.0422 | 0.0861 | 0.6723 | 0.5790  | 0.3446 | 0.3417 | 4.4461  | 0.1083 | 37.9000  |
| LargeArteryStroke | class. Bacilli. id. 1673             | Weighted mode             | 3  | -0.0412 | 0.0792 | 0.6550 | 0.5790  | 0.3446 | 0.3417 | 4.4461  | 0.1083 | 37.9000  |
| LargeArteryStroke | class. Bacteroidia. id. 912          | MR Egger                  | 3  | -1.2172 | 1.6328 | 0.5922 | 0.2598  | 0.3622 | 0.6039 | 1.3476  | 0.2457 | 95.1219  |
| LargeArteryStroke | class. Bacteroidia. id. 912          | Weighted median           | 3  | -0.0313 | 0.0635 | 0.6220 | 0.2598  | 0.3622 | 0.6039 | 1.3476  | 0.2457 | 95.1219  |
| LargeArteryStroke | class. Bacteroidia. id. 912          | Inverse variance weighted | 3  | -0.0470 | 0.0519 | 0.3652 | 0.2598  | 0.3622 | 0.6039 | 1.3476  | 0.2457 | 95.1219  |
| LargeArteryStroke | class. Bacteroidia. id. 912          | Simple mode               | 3  | -0.0188 | 0.0823 | 0.8407 | 0.2598  | 0.3622 | 0.6039 | 1.3476  | 0.2457 | 95.1219  |
| LargeArteryStroke | class. Bacteroidia. id. 912          | Weighted mode             | 3  | -0.0060 | 0.0837 | 0.9496 | 0.2598  | 0.3622 | 0.6039 | 1.3476  | 0.2457 | 95.1219  |
| LargeArteryStroke | class. Betaproteobacteria. id. 2867  | MR Egger                  | 3  | -2.4954 | 1.5438 | 0.3527 | 0.5524  | 0.3425 | 0.3533 | 4.0518  | 0.1319 | 64.6400  |
| LargeArteryStroke | class. Betaproteobacteria. id. 2867  | Weighted median           | 3  | 0.0460  | 0.0690 | 0.5046 | 0.5524  | 0.3425 | 0.3533 | 4.0518  | 0.1319 | 64.6400  |
| LargeArteryStroke | class. Betaproteobacteria. id. 2867  | Inverse variance weighted | 3  | -0.0067 | 0.0756 | 0.9293 | 0.5524  | 0.3425 | 0.3533 | 4.0518  | 0.1319 | 64.6400  |
| LargeArteryStroke | class. Betaproteobacteria. id. 2867  | Simple mode               | 3  | 0.0569  | 0.0872 | 0.5815 | 0.5524  | 0.3425 | 0.3533 | 4.0518  | 0.1319 | 64.6400  |
| LargeArteryStroke | class. Betaproteobacteria. id. 2867  | Weighted mode             | 3  | 0.0578  | 0.0731 | 0.5123 | 0.5524  | 0.3425 | 0.3533 | 4.0518  | 0.1319 | 64.6400  |
| LargeArteryStroke | class. Clostridia. id. 1859          | MR Egger                  | 3  | 1.8228  | 1.4062 | 0.4183 | -0.4003 | 0.3119 | 0.4214 | 1.9850  | 0.3707 | 112.9704 |
| LargeArteryStroke | class. Clostridia. id. 1859          | Weighted median           | 3  | 0.0622  | 0.0645 | 0.3351 | -0.4003 | 0.3119 | 0.4214 | 1.9850  | 0.3707 | 112.9704 |
| LargeArteryStroke | class. Clostridia. id. 1859          | Inverse variance weighted | 3  | 0.0195  | 0.0514 | 0.7039 | -0.4003 | 0.3119 | 0.4214 | 1.9850  | 0.3707 | 112.9704 |

|                   |                                     |                           |   |         |        |        |         |        |        |        |        |          |
|-------------------|-------------------------------------|---------------------------|---|---------|--------|--------|---------|--------|--------|--------|--------|----------|
| LargeArteryStroke | class.Clostridia. id. 1859          | Simple mode               | 3 | 0.0758  | 0.0813 | 0.4498 | -0.4003 | 0.3119 | 0.4214 | 1.9850 | 0.3707 | 112.9704 |
| LargeArteryStroke | class.Clostridia. id. 1859          | Weighted mode             | 3 | 0.0766  | 0.0832 | 0.4545 | -0.4003 | 0.3119 | 0.4214 | 1.9850 | 0.3707 | 112.9704 |
| LargeArteryStroke | class.Coriobacteriia. id. 809       | MR Egger                  | 3 | -1.3229 | 1.5814 | 0.5565 | 0.3022  | 0.3510 | 0.5474 | 1.2339 | 0.2667 | 106.7875 |
| LargeArteryStroke | class.Coriobacteriia. id. 809       | Weighted median           | 3 | 0.0378  | 0.0687 | 0.5819 | 0.3022  | 0.3510 | 0.5474 | 1.2339 | 0.2667 | 106.7875 |
| LargeArteryStroke | class.Coriobacteriia. id. 809       | Inverse variance weighted | 3 | 0.0380  | 0.0539 | 0.4809 | 0.3022  | 0.3510 | 0.5474 | 1.2339 | 0.2667 | 106.7875 |
| LargeArteryStroke | class.Coriobacteriia. id. 809       | Simple mode               | 3 | 0.0367  | 0.0926 | 0.7301 | 0.3022  | 0.3510 | 0.5474 | 1.2339 | 0.2667 | 106.7875 |
| LargeArteryStroke | class.Coriobacteriia. id. 809       | Weighted mode             | 3 | 0.0534  | 0.0912 | 0.6176 | 0.3022  | 0.3510 | 0.5474 | 1.2339 | 0.2667 | 106.7875 |
| LargeArteryStroke | class.Deltaproteobacteria. id. 3087 | MR Egger                  | 3 | 0.1513  | 1.5435 | 0.9378 | -0.0355 | 0.3425 | 0.9343 | 0.0226 | 0.8804 | 764.3940 |
| LargeArteryStroke | class.Deltaproteobacteria. id. 3087 | Weighted median           | 3 | -0.0121 | 0.0644 | 0.8510 | -0.0355 | 0.3425 | 0.9343 | 0.0226 | 0.8804 | 764.3940 |
| LargeArteryStroke | class.Deltaproteobacteria. id. 3087 | Inverse variance weighted | 3 | -0.0085 | 0.0564 | 0.8802 | -0.0355 | 0.3425 | 0.9343 | 0.0226 | 0.8804 | 764.3940 |
| LargeArteryStroke | class.Deltaproteobacteria. id. 3087 | Simple mode               | 3 | -0.0145 | 0.0749 | 0.8641 | -0.0355 | 0.3425 | 0.9343 | 0.0226 | 0.8804 | 764.3940 |
| LargeArteryStroke | class.Deltaproteobacteria. id. 3087 | Weighted mode             | 3 | -0.0145 | 0.0769 | 0.8675 | -0.0355 | 0.3425 | 0.9343 | 0.0226 | 0.8804 | 764.3940 |
| LargeArteryStroke | class.Erysipelotrichia. id. 2147    | MR Egger                  | 3 | -0.9004 | 1.4098 | 0.6382 | 0.2116  | 0.3128 | 0.6213 | 0.3690 | 0.5435 | 128.8711 |
| LargeArteryStroke | class.Erysipelotrichia. id. 2147    | Weighted median           | 3 | 0.0798  | 0.0611 | 0.1910 | 0.2116  | 0.3128 | 0.6213 | 0.3690 | 0.5435 | 128.8711 |
| LargeArteryStroke | class.Erysipelotrichia. id. 2147    | Inverse variance weighted | 3 | 0.0529  | 0.0515 | 0.3047 | 0.2116  | 0.3128 | 0.6213 | 0.3690 | 0.5435 | 128.8711 |
| LargeArteryStroke | class.Erysipelotrichia. id. 2147    | Simple mode               | 3 | 0.0816  | 0.0668 | 0.3464 | 0.2116  | 0.3128 | 0.6213 | 0.3690 | 0.5435 | 128.8711 |
| LargeArteryStroke | class.Erysipelotrichia. id. 2147    | Weighted mode             | 3 | 0.0813  | 0.0727 | 0.3797 | 0.2116  | 0.3128 | 0.6213 | 0.3690 | 0.5435 | 128.8711 |
| LargeArteryStroke | class.Gammaproteobacteria. id. 3303 | MR Egger                  | 3 | 1.8805  | 1.7234 | 0.4723 | -0.4218 | 0.3823 | 0.4687 | 2.9010 | 0.2345 | 78.2691  |
| LargeArteryStroke | class.Gammaproteobacteria. id. 3303 | Weighted median           | 3 | -0.0735 | 0.0695 | 0.2903 | -0.4218 | 0.3823 | 0.4687 | 2.9010 | 0.2345 | 78.2691  |
| LargeArteryStroke | class.Gammaproteobacteria. id. 3303 | Inverse variance weighted | 3 | -0.0198 | 0.0663 | 0.7657 | -0.4218 | 0.3823 | 0.4687 | 2.9010 | 0.2345 | 78.2691  |
| LargeArteryStroke | class.Gammaproteobacteria. id. 3303 | Simple mode               | 3 | -0.0772 | 0.0881 | 0.4732 | -0.4218 | 0.3823 | 0.4687 | 2.9010 | 0.2345 | 78.2691  |
| LargeArteryStroke | class.Gammaproteobacteria. id. 3303 | Weighted mode             | 3 | -0.0766 | 0.0800 | 0.4391 | -0.4218 | 0.3823 | 0.4687 | 2.9010 | 0.2345 | 78.2691  |
| LargeArteryStroke | class.Lentisphaeria. id. 2250       | MR Egger                  | 3 | -0.4336 | 2.7846 | 0.9017 | 0.1332  | 0.6169 | 0.8646 | 0.0708 | 0.7902 | 42.0863  |
| LargeArteryStroke | class.Lentisphaeria. id. 2250       | Weighted median           | 3 | 0.1818  | 0.1148 | 0.1133 | 0.1332  | 0.6169 | 0.8646 | 0.0708 | 0.7902 | 42.0863  |
| LargeArteryStroke | class.Lentisphaeria. id. 2250       | Inverse variance weighted | 3 | 0.1671  | 0.1015 | 0.0995 | 0.1332  | 0.6169 | 0.8646 | 0.0708 | 0.7902 | 42.0863  |
| LargeArteryStroke | class.Lentisphaeria. id. 2250       | Simple mode               | 3 | 0.1879  | 0.1320 | 0.2905 | 0.1332  | 0.6169 | 0.8646 | 0.0708 | 0.7902 | 42.0863  |
| LargeArteryStroke | class.Lentisphaeria. id. 2250       | Weighted mode             | 3 | 0.1868  | 0.1334 | 0.2964 | 0.1332  | 0.6169 | 0.8646 | 0.0708 | 0.7902 | 42.0863  |
| LargeArteryStroke | class.Melainabacteria. id. 1589     | MR Egger                  | 3 | -0.6741 | 2.4504 | 0.8291 | 0.1467  | 0.5432 | 0.8320 | 0.1031 | 0.7481 | 200.4822 |
| LargeArteryStroke | class.Melainabacteria. id. 1589     | Weighted median           | 3 | 0.0038  | 0.1081 | 0.9717 | 0.1467  | 0.5432 | 0.8320 | 0.1031 | 0.7481 | 200.4822 |
| LargeArteryStroke | class.Melainabacteria. id. 1589     | Inverse variance weighted | 3 | -0.0126 | 0.0907 | 0.8894 | 0.1467  | 0.5432 | 0.8320 | 0.1031 | 0.7481 | 200.4822 |
| LargeArteryStroke | class.Melainabacteria. id. 1589     | Simple mode               | 3 | 0.0116  | 0.1179 | 0.9307 | 0.1467  | 0.5432 | 0.8320 | 0.1031 | 0.7481 | 200.4822 |
| LargeArteryStroke | class.Melainabacteria. id. 1589     | Weighted mode             | 3 | 0.0104  | 0.1185 | 0.9381 | 0.1467  | 0.5432 | 0.8320 | 0.1031 | 0.7481 | 200.4822 |
| LargeArteryStroke | class.Mollicutes. id. 3920          | MR Egger                  | 3 | 1.8819  | 1.7676 | 0.4801 | -0.4016 | 0.3921 | 0.4924 | 1.4804 | 0.4770 | 69.0219  |
| LargeArteryStroke | class.Mollicutes. id. 3920          | Weighted median           | 3 | 0.0974  | 0.0774 | 0.2083 | -0.4016 | 0.3921 | 0.4924 | 1.4804 | 0.4770 | 69.0219  |
| LargeArteryStroke | class.Mollicutes. id. 3920          | Inverse variance weighted | 3 | 0.0728  | 0.0650 | 0.2626 | -0.4016 | 0.3921 | 0.4924 | 1.4804 | 0.4770 | 69.0219  |
| LargeArteryStroke | class.Mollicutes. id. 3920          | Simple mode               | 3 | 0.1330  | 0.1015 | 0.3204 | -0.4016 | 0.3921 | 0.4924 | 1.4804 | 0.4770 | 69.0219  |
| LargeArteryStroke | class.Mollicutes. id. 3920          | Weighted mode             | 3 | 0.1346  | 0.1083 | 0.3399 | -0.4016 | 0.3921 | 0.4924 | 1.4804 | 0.4770 | 69.0219  |
| LargeArteryStroke | class.Negativicutes. id. 2164       | MR Egger                  | 3 | 1.1534  | 1.4122 | 0.5640 | -0.2471 | 0.3133 | 0.5749 | 0.7060 | 0.4008 | 100.4274 |
| LargeArteryStroke | class.Negativicutes. id. 2164       | Weighted median           | 3 | 0.0103  | 0.0613 | 0.8664 | -0.2471 | 0.3133 | 0.5749 | 0.7060 | 0.4008 | 100.4274 |
| LargeArteryStroke | class.Negativicutes. id. 2164       | Inverse variance weighted | 3 | 0.0404  | 0.0516 | 0.4340 | -0.2471 | 0.3133 | 0.5749 | 0.7060 | 0.4008 | 100.4274 |
| LargeArteryStroke | class.Negativicutes. id. 2164       | Simple mode               | 3 | 0.0039  | 0.0726 | 0.9617 | -0.2471 | 0.3133 | 0.5749 | 0.7060 | 0.4008 | 100.4274 |
| LargeArteryStroke | class.Negativicutes. id. 2164       | Weighted mode             | 3 | 0.0044  | 0.0737 | 0.9576 | -0.2471 | 0.3133 | 0.5749 | 0.7060 | 0.4008 | 100.4274 |
| LargeArteryStroke | class.Verrucomicrobiae. id. 4029    | MR Egger                  | 3 | 1.8844  | 1.7164 | 0.4703 | -0.3989 | 0.3809 | 0.4853 | 1.3891 | 0.4993 | 57.8609  |
| LargeArteryStroke | class.Verrucomicrobiae. id. 4029    | Weighted median           | 3 | 0.0555  | 0.0808 | 0.4921 | -0.3989 | 0.3809 | 0.4853 | 1.3891 | 0.4993 | 57.8609  |
| LargeArteryStroke | class.Verrucomicrobiae. id. 4029    | Inverse variance weighted | 3 | 0.0880  | 0.0629 | 0.1621 | -0.3989 | 0.3809 | 0.4853 | 1.3891 | 0.4993 | 57.8609  |
| LargeArteryStroke | class.Verrucomicrobiae. id. 4029    | Simple mode               | 3 | 0.0435  | 0.0923 | 0.6837 | -0.3989 | 0.3809 | 0.4853 | 1.3891 | 0.4993 | 57.8609  |
| LargeArteryStroke | class.Verrucomicrobiae. id. 4029    | Weighted mode             | 3 | 0.0419  | 0.0878 | 0.6803 | -0.3989 | 0.3809 | 0.4853 | 1.3891 | 0.4993 | 57.8609  |
| LargeArteryStroke | family.Acidaminococcaceae. id. 2166 | MR Egger                  | 3 | 1.0363  | 1.7088 | 0.6529 | -0.2218 | 0.3790 | 0.6629 | 0.5233 | 0.4694 | 105.7402 |
| LargeArteryStroke | family.Acidaminococcaceae. id. 2166 | Weighted median           | 3 | 0.0117  | 0.0739 | 0.8746 | -0.2218 | 0.3790 | 0.6629 | 0.5233 | 0.4694 | 105.7402 |
| LargeArteryStroke | family.Acidaminococcaceae. id. 2166 | Inverse variance weighted | 3 | 0.0369  | 0.0625 | 0.5551 | -0.2218 | 0.3790 | 0.6629 | 0.5233 | 0.4694 | 105.7402 |
| LargeArteryStroke | family.Acidaminococcaceae. id. 2166 | Simple mode               | 3 | 0.0010  | 0.0908 | 0.9925 | -0.2218 | 0.3790 | 0.6629 | 0.5233 | 0.4694 | 105.7402 |
| LargeArteryStroke | family.Acidaminococcaceae. id. 2166 | Weighted mode             | 3 | 0.0022  | 0.0923 | 0.9832 | -0.2218 | 0.3790 | 0.6629 | 0.5233 | 0.4694 | 105.7402 |
| LargeArteryStroke | family.Actinomycetaceae. id. 421    | MR Egger                  | 3 | -0.5591 | 2.1675 | 0.8393 | 0.1237  | 0.4816 | 0.8400 | 1.0755 | 0.2997 | 94.5138  |
| LargeArteryStroke | family.Actinomycetaceae. id. 421    | Weighted median           | 3 | -0.0106 | 0.0964 | 0.9125 | 0.1237  | 0.4816 | 0.8400 | 1.0755 | 0.2997 | 94.5138  |
| LargeArteryStroke | family.Actinomycetaceae. id. 421    | Inverse variance weighted | 3 | -0.0029 | 0.0772 | 0.9699 | 0.1237  | 0.4816 | 0.8400 | 1.0755 | 0.2997 | 94.5138  |
| LargeArteryStroke | family.Actinomycetaceae. id. 421    | Simple mode               | 3 | -0.0387 | 0.1197 | 0.7770 | 0.1237  | 0.4816 | 0.8400 | 1.0755 | 0.2997 | 94.5138  |
| LargeArteryStroke | family.Actinomycetaceae. id. 421    | Weighted mode             | 3 | -0.0272 | 0.1155 | 0.8359 | 0.1237  | 0.4816 | 0.8400 | 1.0755 | 0.2997 | 94.5138  |
| LargeArteryStroke | family.Alcaligenaceae. id. 2875     | MR Egger                  | 3 | -2.1920 | 1.9782 | 0.4674 | 0.4835  | 0.4388 | 0.4692 | 4.0052 | 0.1350 | 62.3016  |

|                   |                                                |                           |   |         |        |        |         |        |        |        |        |          |
|-------------------|------------------------------------------------|---------------------------|---|---------|--------|--------|---------|--------|--------|--------|--------|----------|
| LargeArteryStroke | family. Alcaligenaceae. id. 2875               | Weighted median           | 3 | 0.0481  | 0.0661 | 0.4675 | 0.4835  | 0.4388 | 0.4692 | 4.0052 | 0.1350 | 62.3016  |
| LargeArteryStroke | family. Alcaligenaceae. id. 2875               | Inverse variance weighted | 3 | -0.0137 | 0.0760 | 0.8568 | 0.4835  | 0.4388 | 0.4692 | 4.0052 | 0.1350 | 62.3016  |
| LargeArteryStroke | family. Alcaligenaceae. id. 2875               | Simple mode               | 3 | 0.0521  | 0.0807 | 0.5844 | 0.4835  | 0.4388 | 0.4692 | 4.0052 | 0.1350 | 62.3016  |
| LargeArteryStroke | family. Alcaligenaceae. id. 2875               | Weighted mode             | 3 | 0.0515  | 0.0705 | 0.5407 | 0.4835  | 0.4388 | 0.4692 | 4.0052 | 0.1350 | 62.3016  |
| LargeArteryStroke | family. Bacteroidaceae. id. 917                | MR Egger                  | 3 | -1.1459 | 1.4077 | 0.5650 | 0.2277  | 0.3123 | 0.5989 | 0.5326 | 0.7662 | 55.5445  |
| LargeArteryStroke | family. Bacteroidaceae. id. 917                | Weighted median           | 3 | -0.1199 | 0.0624 | 0.0546 | 0.2277  | 0.3123 | 0.5989 | 0.5326 | 0.7662 | 55.5445  |
| LargeArteryStroke | family. Bacteroidaceae. id. 917                | Inverse variance weighted | 3 | -0.1199 | 0.0514 | 0.0197 | 0.2277  | 0.3123 | 0.5989 | 0.5326 | 0.7662 | 55.5445  |
| LargeArteryStroke | family. Bacteroidaceae. id. 917                | Simple mode               | 3 | -0.1399 | 0.0741 | 0.1994 | 0.2277  | 0.3123 | 0.5989 | 0.5326 | 0.7662 | 55.5445  |
| LargeArteryStroke | family. Bacteroidaceae. id. 917                | Weighted mode             | 3 | -0.1227 | 0.0723 | 0.2316 | 0.2277  | 0.3123 | 0.5989 | 0.5326 | 0.7662 | 55.5445  |
| LargeArteryStroke | family. BacteroidalesS24. 7group. id. 11173    | MR Egger                  | 3 | 1.3900  | 2.1501 | 0.6347 | -0.3275 | 0.4767 | 0.6168 | 0.4806 | 0.4881 | 74.3287  |
| LargeArteryStroke | family. BacteroidalesS24. 7group. id. 11173    | Weighted median           | 3 | -0.0795 | 0.0938 | 0.3967 | -0.3275 | 0.4767 | 0.6168 | 0.4806 | 0.4881 | 74.3287  |
| LargeArteryStroke | family. BacteroidalesS24. 7group. id. 11173    | Inverse variance weighted | 3 | -0.0862 | 0.0786 | 0.2727 | -0.3275 | 0.4767 | 0.6168 | 0.4806 | 0.4881 | 74.3287  |
| LargeArteryStroke | family. BacteroidalesS24. 7group. id. 11173    | Simple mode               | 3 | -0.0595 | 0.1181 | 0.6642 | -0.3275 | 0.4767 | 0.6168 | 0.4806 | 0.4881 | 74.3287  |
| LargeArteryStroke | family. BacteroidalesS24. 7group. id. 11173    | Weighted mode             | 3 | -0.0540 | 0.1155 | 0.6861 | -0.3275 | 0.4767 | 0.6168 | 0.4806 | 0.4881 | 74.3287  |
| LargeArteryStroke | family. Bifidobacteriaceae. id. 433            | MR Egger                  | 3 | -2.5321 | 1.5536 | 0.3504 | 0.5772  | 0.3447 | 0.3428 | 2.8536 | 0.2401 | 72.2369  |
| LargeArteryStroke | family. Bifidobacteriaceae. id. 433            | Weighted median           | 3 | 0.0681  | 0.0746 | 0.3608 | 0.5772  | 0.3447 | 0.3428 | 2.8536 | 0.2401 | 72.2369  |
| LargeArteryStroke | family. Bifidobacteriaceae. id. 433            | Inverse variance weighted | 3 | 0.0673  | 0.0680 | 0.3221 | 0.5772  | 0.3447 | 0.3428 | 2.8536 | 0.2401 | 72.2369  |
| LargeArteryStroke | family. Bifidobacteriaceae. id. 433            | Simple mode               | 3 | 0.0555  | 0.0978 | 0.6279 | 0.5772  | 0.3447 | 0.3428 | 2.8536 | 0.2401 | 72.2369  |
| LargeArteryStroke | family. Bifidobacteriaceae. id. 433            | Weighted mode             | 3 | 0.0821  | 0.0972 | 0.4873 | 0.5772  | 0.3447 | 0.3428 | 2.8536 | 0.2401 | 72.2369  |
| LargeArteryStroke | family. Christensenellaceae. id. 1866          | MR Egger                  | 3 | 2.5120  | 1.4576 | 0.3347 | -0.5310 | 0.3234 | 0.3483 | 2.9361 | 0.2304 | 42.8689  |
| LargeArteryStroke | family. Christensenellaceae. id. 1866          | Weighted median           | 3 | 0.1453  | 0.0712 | 0.0412 | -0.5310 | 0.3234 | 0.3483 | 2.9361 | 0.2304 | 42.8689  |
| LargeArteryStroke | family. Christensenellaceae. id. 1866          | Inverse variance weighted | 3 | 0.1203  | 0.0647 | 0.0629 | -0.5310 | 0.3234 | 0.3483 | 2.9361 | 0.2304 | 42.8689  |
| LargeArteryStroke | family. Christensenellaceae. id. 1866          | Simple mode               | 3 | 0.1931  | 0.0963 | 0.1829 | -0.5310 | 0.3234 | 0.3483 | 2.9361 | 0.2304 | 42.8689  |
| LargeArteryStroke | family. Christensenellaceae. id. 1866          | Weighted mode             | 3 | 0.1918  | 0.1083 | 0.2185 | -0.5310 | 0.3234 | 0.3483 | 2.9361 | 0.2304 | 42.8689  |
| LargeArteryStroke | family. Clostridiaceae1. id. 1869              | MR Egger                  | 3 | 1.6285  | 1.5882 | 0.4920 | -0.3491 | 0.3523 | 0.5029 | 0.9965 | 0.6076 | 93.0628  |
| LargeArteryStroke | family. Clostridiaceae1. id. 1869              | Weighted median           | 3 | 0.0673  | 0.0711 | 0.3439 | -0.3491 | 0.3523 | 0.5029 | 0.9965 | 0.6076 | 93.0628  |
| LargeArteryStroke | family. Clostridiaceae1. id. 1869              | Inverse variance weighted | 3 | 0.0560  | 0.0584 | 0.3380 | -0.3491 | 0.3523 | 0.5029 | 0.9965 | 0.6076 | 93.0628  |
| LargeArteryStroke | family. Clostridiaceae1. id. 1869              | Simple mode               | 3 | 0.1010  | 0.0885 | 0.3723 | -0.3491 | 0.3523 | 0.5029 | 0.9965 | 0.6076 | 93.0628  |
| LargeArteryStroke | family. Clostridiaceae1. id. 1869              | Weighted mode             | 3 | 0.0980  | 0.0845 | 0.3659 | -0.3491 | 0.3523 | 0.5029 | 0.9965 | 0.6076 | 93.0628  |
| LargeArteryStroke | family. ClostridialesvadinBB60group. id. 11286 | MR Egger                  | 3 | 5.2881  | 1.8402 | 0.2132 | -1.1620 | 0.4081 | 0.2150 | 8.6607 | 0.0132 | 29.9753  |
| LargeArteryStroke | family. ClostridialesvadinBB60group. id. 11286 | Weighted median           | 3 | 0.1155  | 0.0922 | 0.2103 | -1.1620 | 0.4081 | 0.2150 | 8.6607 | 0.0132 | 29.9753  |
| LargeArteryStroke | family. ClostridialesvadinBB60group. id. 11286 | Inverse variance weighted | 3 | 0.0521  | 0.1401 | 0.7100 | -1.1620 | 0.4081 | 0.2150 | 8.6607 | 0.0132 | 29.9753  |
| LargeArteryStroke | family. ClostridialesvadinBB60group. id. 11286 | Simple mode               | 3 | 0.2110  | 0.1223 | 0.2266 | -1.1620 | 0.4081 | 0.2150 | 8.6607 | 0.0132 | 29.9753  |
| LargeArteryStroke | family. ClostridialesvadinBB60group. id. 11286 | Weighted mode             | 3 | 0.2062  | 0.1343 | 0.2644 | -1.1620 | 0.4081 | 0.2150 | 8.6607 | 0.0132 | 29.9753  |
| LargeArteryStroke | family. Coriobacteriaceae. id. 811             | MR Egger                  | 3 | -1.3229 | 1.5814 | 0.5565 | 0.3022  | 0.3510 | 0.5474 | 1.2339 | 0.2667 | 106.7875 |
| LargeArteryStroke | family. Coriobacteriaceae. id. 811             | Weighted median           | 3 | 0.0378  | 0.0684 | 0.5806 | 0.3022  | 0.3510 | 0.5474 | 1.2339 | 0.2667 | 106.7875 |
| LargeArteryStroke | family. Coriobacteriaceae. id. 811             | Inverse variance weighted | 3 | 0.0380  | 0.0539 | 0.4809 | 0.3022  | 0.3510 | 0.5474 | 1.2339 | 0.2667 | 106.7875 |
| LargeArteryStroke | family. Coriobacteriaceae. id. 811             | Simple mode               | 3 | 0.0367  | 0.0841 | 0.7053 | 0.3022  | 0.3510 | 0.5474 | 1.2339 | 0.2667 | 106.7875 |
| LargeArteryStroke | family. Coriobacteriaceae. id. 811             | Weighted mode             | 3 | 0.0534  | 0.0898 | 0.6127 | 0.3022  | 0.3510 | 0.5474 | 1.2339 | 0.2667 | 106.7875 |
| LargeArteryStroke | family. Defluviitaleaceae. id. 1924            | MR Egger                  | 3 | -1.2739 | 2.0463 | 0.6455 | 0.2781  | 0.4542 | 0.6503 | 0.7038 | 0.4015 | 90.4143  |
| LargeArteryStroke | family. Defluviitaleaceae. id. 1924            | Weighted median           | 3 | 0.0069  | 0.0871 | 0.9365 | 0.2781  | 0.4542 | 0.6503 | 0.7038 | 0.4015 | 90.4143  |
| LargeArteryStroke | family. Defluviitaleaceae. id. 1924            | Inverse variance weighted | 3 | -0.0220 | 0.0756 | 0.7715 | 0.2781  | 0.4542 | 0.6503 | 0.7038 | 0.4015 | 90.4143  |
| LargeArteryStroke | family. Defluviitaleaceae. id. 1924            | Simple mode               | 3 | 0.0271  | 0.1115 | 0.8305 | 0.2781  | 0.4542 | 0.6503 | 0.7038 | 0.4015 | 90.4143  |
| LargeArteryStroke | family. Defluviitaleaceae. id. 1924            | Weighted mode             | 3 | 0.0241  | 0.1024 | 0.8357 | 0.2781  | 0.4542 | 0.6503 | 0.7038 | 0.4015 | 90.4143  |
| LargeArteryStroke | family. Desulfovibrionaceae. id. 3169          | MR Egger                  | 3 | 0.2300  | 1.5447 | 0.9059 | -0.0524 | 0.3427 | 0.9034 | 0.0295 | 0.8635 | 682.6458 |
| LargeArteryStroke | family. Desulfovibrionaceae. id. 3169          | Weighted median           | 3 | -0.0122 | 0.0613 | 0.8423 | -0.0524 | 0.3427 | 0.9034 | 0.0295 | 0.8635 | 682.6458 |
| LargeArteryStroke | family. Desulfovibrionaceae. id. 3169          | Inverse variance weighted | 3 | -0.0060 | 0.0564 | 0.9147 | -0.0524 | 0.3427 | 0.9034 | 0.0295 | 0.8635 | 682.6458 |
| LargeArteryStroke | family. Desulfovibrionaceae. id. 3169          | Simple mode               | 3 | -0.0141 | 0.0774 | 0.8727 | -0.0524 | 0.3427 | 0.9034 | 0.0295 | 0.8635 | 682.6458 |
| LargeArteryStroke | family. Desulfovibrionaceae. id. 3169          | Weighted mode             | 3 | -0.0139 | 0.0783 | 0.8751 | -0.0524 | 0.3427 | 0.9034 | 0.0295 | 0.8635 | 682.6458 |
| LargeArteryStroke | family. Enterobacteriaceae. id. 3469           | MR Egger                  | 3 | 2.5893  | 1.8551 | 0.3958 | -0.5865 | 0.4117 | 0.3896 | 3.9021 | 0.1421 | 57.6074  |
| LargeArteryStroke | family. Enterobacteriaceae. id. 3469           | Weighted median           | 3 | -0.1161 | 0.0767 | 0.1300 | -0.5865 | 0.4117 | 0.3896 | 3.9021 | 0.1421 | 57.6074  |
| LargeArteryStroke | family. Enterobacteriaceae. id. 3469           | Inverse variance weighted | 3 | -0.0516 | 0.0835 | 0.5362 | -0.5865 | 0.4117 | 0.3896 | 3.9021 | 0.1421 | 57.6074  |
| LargeArteryStroke | family. Enterobacteriaceae. id. 3469           | Simple mode               | 3 | -0.1236 | 0.1000 | 0.3416 | -0.5865 | 0.4117 | 0.3896 | 3.9021 | 0.1421 | 57.6074  |
| LargeArteryStroke | family. Enterobacteriaceae. id. 3469           | Weighted mode             | 3 | -0.1245 | 0.0956 | 0.3228 | -0.5865 | 0.4117 | 0.3896 | 3.9021 | 0.1421 | 57.6074  |
| LargeArteryStroke | family. Erysipelotrichaceae. id. 2149          | MR Egger                  | 3 | -0.9004 | 1.4098 | 0.6382 | 0.2116  | 0.3128 | 0.6213 | 0.3690 | 0.5435 | 128.8711 |
| LargeArteryStroke | family. Erysipelotrichaceae. id. 2149          | Weighted median           | 3 | 0.0798  | 0.0605 | 0.1869 | 0.2116  | 0.3128 | 0.6213 | 0.3690 | 0.5435 | 128.8711 |
| LargeArteryStroke | family. Erysipelotrichaceae. id. 2149          | Inverse variance weighted | 3 | 0.0529  | 0.0515 | 0.3047 | 0.2116  | 0.3128 | 0.6213 | 0.3690 | 0.5435 | 128.8711 |
| LargeArteryStroke | family. Erysipelotrichaceae. id. 2149          | Simple mode               | 3 | 0.0816  | 0.0751 | 0.3911 | 0.2116  | 0.3128 | 0.6213 | 0.3690 | 0.5435 | 128.8711 |

|                   |                                         |                           |   |         |        |        |         |        |        |        |        |          |
|-------------------|-----------------------------------------|---------------------------|---|---------|--------|--------|---------|--------|--------|--------|--------|----------|
| LargeArteryStroke | family. Erysipelotrichaceae. id. 2149   | Weighted mode             | 3 | 0.0813  | 0.0759 | 0.3960 | 0.2116  | 0.3128 | 0.6213 | 0.3690 | 0.5435 | 128.8711 |
| LargeArteryStroke | family. FamilyXIII. id. 1957            | MR Egger                  | 3 | -0.4110 | 1.4543 | 0.8247 | 0.1085  | 0.3227 | 0.7935 | 0.0642 | 0.8000 | 108.1268 |
| LargeArteryStroke | family. FamilyXIII. id. 1957            | Weighted median           | 3 | 0.0712  | 0.0626 | 0.2554 | 0.1085  | 0.3227 | 0.7935 | 0.0642 | 0.8000 | 108.1268 |
| LargeArteryStroke | family. FamilyXIII. id. 1957            | Inverse variance weighted | 3 | 0.0777  | 0.0536 | 0.1472 | 0.1085  | 0.3227 | 0.7935 | 0.0642 | 0.8000 | 108.1268 |
| LargeArteryStroke | family. FamilyXIII. id. 1957            | Simple mode               | 3 | 0.0623  | 0.0739 | 0.4878 | 0.1085  | 0.3227 | 0.7935 | 0.0642 | 0.8000 | 108.1268 |
| LargeArteryStroke | family. FamilyXIII. id. 1957            | Weighted mode             | 3 | 0.0617  | 0.0715 | 0.4793 | 0.1085  | 0.3227 | 0.7935 | 0.0642 | 0.8000 | 108.1268 |
| LargeArteryStroke | family. Lachnospiraceae. id. 1987       | MR Egger                  | 3 | -0.5825 | 1.6431 | 0.7831 | 0.1173  | 0.3645 | 0.8018 | 1.3656 | 0.2426 | 88.5160  |
| LargeArteryStroke | family. Lachnospiraceae. id. 1987       | Weighted median           | 3 | -0.0490 | 0.0631 | 0.4372 | 0.1173  | 0.3645 | 0.8018 | 1.3656 | 0.2426 | 88.5160  |
| LargeArteryStroke | family. Lachnospiraceae. id. 1987       | Inverse variance weighted | 3 | -0.0541 | 0.0514 | 0.2918 | 0.1173  | 0.3645 | 0.8018 | 1.3656 | 0.2426 | 88.5160  |
| LargeArteryStroke | family. Lachnospiraceae. id. 1987       | Simple mode               | 3 | -0.0561 | 0.0817 | 0.5628 | 0.1173  | 0.3645 | 0.8018 | 1.3656 | 0.2426 | 88.5160  |
| LargeArteryStroke | family. Lachnospiraceae. id. 1987       | Weighted mode             | 3 | -0.0421 | 0.0754 | 0.6324 | 0.1173  | 0.3645 | 0.8018 | 1.3656 | 0.2426 | 88.5160  |
| LargeArteryStroke | family. Lactobacillaceae. id. 1836      | MR Egger                  | 3 | -2.9961 | 2.5373 | 0.4473 | 0.6634  | 0.5629 | 0.4479 | 2.9894 | 0.2243 | 44.1353  |
| LargeArteryStroke | family. Lactobacillaceae. id. 1836      | Weighted median           | 3 | 0.0799  | 0.1055 | 0.4491 | 0.6634  | 0.5629 | 0.4479 | 2.9894 | 0.2243 | 44.1353  |
| LargeArteryStroke | family. Lactobacillaceae. id. 1836      | Inverse variance weighted | 3 | -0.0074 | 0.1025 | 0.9427 | 0.6634  | 0.5629 | 0.4479 | 2.9894 | 0.2243 | 44.1353  |
| LargeArteryStroke | family. Lactobacillaceae. id. 1836      | Simple mode               | 3 | 0.0841  | 0.1277 | 0.5780 | 0.6634  | 0.5629 | 0.4479 | 2.9894 | 0.2243 | 44.1353  |
| LargeArteryStroke | family. Lactobacillaceae. id. 1836      | Weighted mode             | 3 | 0.0833  | 0.1256 | 0.5752 | 0.6634  | 0.5629 | 0.4479 | 2.9894 | 0.2243 | 44.1353  |
| LargeArteryStroke | family. Oxalobacteraceae. id. 2966      | MR Egger                  | 3 | 0.3713  | 5.7938 | 0.9593 | -0.0799 | 1.2862 | 0.9605 | 4.9782 | 0.0257 | 27.2108  |
| LargeArteryStroke | family. Oxalobacteraceae. id. 2966      | Weighted median           | 3 | 0.0798  | 0.1329 | 0.5481 | -0.0799 | 1.2862 | 0.9605 | 4.9782 | 0.0257 | 27.2108  |
| LargeArteryStroke | family. Oxalobacteraceae. id. 2966      | Inverse variance weighted | 3 | 0.0115  | 0.1517 | 0.9393 | -0.0799 | 1.2862 | 0.9605 | 4.9782 | 0.0257 | 27.2108  |
| LargeArteryStroke | family. Oxalobacteraceae. id. 2966      | Simple mode               | 3 | 0.1611  | 0.1754 | 0.4554 | -0.0799 | 1.2862 | 0.9605 | 4.9782 | 0.0257 | 27.2108  |
| LargeArteryStroke | family. Oxalobacteraceae. id. 2966      | Weighted mode             | 3 | 0.1470  | 0.1666 | 0.4706 | -0.0799 | 1.2862 | 0.9605 | 4.9782 | 0.0257 | 27.2108  |
| LargeArteryStroke | family. Pasteurellaceae. id. 3689       | MR Egger                  | 3 | -0.5940 | 1.9780 | 0.8143 | 0.1496  | 0.4387 | 0.7908 | 0.0841 | 0.7718 | 102.4052 |
| LargeArteryStroke | family. Pasteurellaceae. id. 3689       | Weighted median           | 3 | 0.0994  | 0.0848 | 0.2415 | 0.1496  | 0.4387 | 0.7908 | 0.0841 | 0.7718 | 102.4052 |
| LargeArteryStroke | family. Pasteurellaceae. id. 3689       | Inverse variance weighted | 3 | 0.0801  | 0.0722 | 0.2677 | 0.1496  | 0.4387 | 0.7908 | 0.0841 | 0.7718 | 102.4052 |
| LargeArteryStroke | family. Pasteurellaceae. id. 3689       | Simple mode               | 3 | 0.0996  | 0.0996 | 0.4225 | 0.1496  | 0.4387 | 0.7908 | 0.0841 | 0.7718 | 102.4052 |
| LargeArteryStroke | family. Pasteurellaceae. id. 3689       | Weighted mode             | 3 | 0.0996  | 0.0964 | 0.4101 | 0.1496  | 0.4387 | 0.7908 | 0.0841 | 0.7718 | 102.4052 |
| LargeArteryStroke | family. Peptococcaceae. id. 2024        | MR Egger                  | 3 | 5.1769  | 1.8030 | 0.2134 | -1.1460 | 0.4001 | 0.2139 | 8.4896 | 0.0143 | 33.5253  |
| LargeArteryStroke | family. Peptococcaceae. id. 2024        | Weighted median           | 3 | 0.0773  | 0.0942 | 0.4120 | -1.1460 | 0.4001 | 0.2139 | 8.4896 | 0.0143 | 33.5253  |
| LargeArteryStroke | family. Peptococcaceae. id. 2024        | Inverse variance weighted | 3 | 0.0166  | 0.1372 | 0.9036 | -1.1460 | 0.4001 | 0.2139 | 8.4896 | 0.0143 | 33.5253  |
| LargeArteryStroke | family. Peptococcaceae. id. 2024        | Simple mode               | 3 | 0.1698  | 0.1178 | 0.2862 | -1.1460 | 0.4001 | 0.2139 | 8.4896 | 0.0143 | 33.5253  |
| LargeArteryStroke | family. Peptococcaceae. id. 2024        | Weighted mode             | 3 | 0.1637  | 0.1297 | 0.3343 | -1.1460 | 0.4001 | 0.2139 | 8.4896 | 0.0143 | 33.5253  |
| LargeArteryStroke | family. Peptostreptococcaceae. id. 2042 | MR Egger                  | 3 | -1.0579 | 1.4960 | 0.6082 | 0.2563  | 0.3319 | 0.5814 | 0.7121 | 0.7004 | 79.9739  |
| LargeArteryStroke | family. Peptostreptococcaceae. id. 2042 | Weighted median           | 3 | 0.1124  | 0.0675 | 0.0960 | 0.2563  | 0.3319 | 0.5814 | 0.7121 | 0.7004 | 79.9739  |
| LargeArteryStroke | family. Peptostreptococcaceae. id. 2042 | Inverse variance weighted | 3 | 0.0966  | 0.0550 | 0.0789 | 0.2563  | 0.3319 | 0.5814 | 0.7121 | 0.7004 | 79.9739  |
| LargeArteryStroke | family. Peptostreptococcaceae. id. 2042 | Simple mode               | 3 | 0.1226  | 0.0809 | 0.2691 | 0.2563  | 0.3319 | 0.5814 | 0.7121 | 0.7004 | 79.9739  |
| LargeArteryStroke | family. Peptostreptococcaceae. id. 2042 | Weighted mode             | 3 | 0.1237  | 0.0784 | 0.2552 | 0.2563  | 0.3319 | 0.5814 | 0.7121 | 0.7004 | 79.9739  |
| LargeArteryStroke | family. Porphyromonadaceae. id. 943     | MR Egger                  | 3 | 0.6191  | 1.5885 | 0.7634 | -0.1330 | 0.3524 | 0.7703 | 1.2554 | 0.2625 | 135.5255 |
| LargeArteryStroke | family. Porphyromonadaceae. id. 943     | Weighted median           | 3 | -0.0147 | 0.0635 | 0.8173 | -0.1330 | 0.3524 | 0.7703 | 1.2554 | 0.2625 | 135.5255 |
| LargeArteryStroke | family. Porphyromonadaceae. id. 943     | Inverse variance weighted | 3 | 0.0200  | 0.0518 | 0.6994 | -0.1330 | 0.3524 | 0.7703 | 1.2554 | 0.2625 | 135.5255 |
| LargeArteryStroke | family. Porphyromonadaceae. id. 943     | Simple mode               | 3 | -0.0228 | 0.0806 | 0.8039 | -0.1330 | 0.3524 | 0.7703 | 1.2554 | 0.2625 | 135.5255 |
| LargeArteryStroke | family. Porphyromonadaceae. id. 943     | Weighted mode             | 3 | -0.0249 | 0.0764 | 0.7758 | -0.1330 | 0.3524 | 0.7703 | 1.2554 | 0.2625 | 135.5255 |
| LargeArteryStroke | family. Prevotellaceae. id. 960         | MR Egger                  | 3 | 1.9856  | 2.7591 | 0.6029 | -0.4019 | 0.6119 | 0.6300 | 3.0656 | 0.0800 | 25.1222  |
| LargeArteryStroke | family. Prevotellaceae. id. 960         | Weighted median           | 3 | 0.1258  | 0.0741 | 0.0898 | -0.4019 | 0.6119 | 0.6300 | 3.0656 | 0.0800 | 25.1222  |
| LargeArteryStroke | family. Prevotellaceae. id. 960         | Inverse variance weighted | 3 | 0.1745  | 0.0851 | 0.0404 | -0.4019 | 0.6119 | 0.6300 | 3.0656 | 0.0800 | 25.1222  |
| LargeArteryStroke | family. Prevotellaceae. id. 960         | Simple mode               | 3 | 0.1044  | 0.0925 | 0.3764 | -0.4019 | 0.6119 | 0.6300 | 3.0656 | 0.0800 | 25.1222  |
| LargeArteryStroke | family. Prevotellaceae. id. 960         | Weighted mode             | 3 | 0.1044  | 0.0923 | 0.3755 | -0.4019 | 0.6119 | 0.6300 | 3.0656 | 0.0800 | 25.1222  |
| LargeArteryStroke | family. Rhodospirillaceae. id. 2717     | MR Egger                  | 3 | -2.7624 | 2.0170 | 0.4015 | 0.6055  | 0.4474 | 0.4051 | 2.8151 | 0.2447 | 49.4629  |
| LargeArteryStroke | family. Rhodospirillaceae. id. 2717     | Weighted median           | 3 | 0.0374  | 0.0974 | 0.7013 | 0.6055  | 0.4474 | 0.4051 | 2.8151 | 0.2447 | 49.4629  |
| LargeArteryStroke | family. Rhodospirillaceae. id. 2717     | Inverse variance weighted | 3 | -0.0341 | 0.0880 | 0.6982 | 0.6055  | 0.4474 | 0.4051 | 2.8151 | 0.2447 | 49.4629  |
| LargeArteryStroke | family. Rhodospirillaceae. id. 2717     | Simple mode               | 3 | 0.0423  | 0.1092 | 0.7359 | 0.6055  | 0.4474 | 0.4051 | 2.8151 | 0.2447 | 49.4629  |
| LargeArteryStroke | family. Rhodospirillaceae. id. 2717     | Weighted mode             | 3 | 0.0430  | 0.1086 | 0.7302 | 0.6055  | 0.4474 | 0.4051 | 2.8151 | 0.2447 | 49.4629  |
| LargeArteryStroke | family. Rikenellaceae. id. 967          | MR Egger                  | 3 | -0.0821 | 1.4262 | 0.9634 | 0.0255  | 0.3164 | 0.9488 | 0.1535 | 0.6952 | 244.5812 |
| LargeArteryStroke | family. Rikenellaceae. id. 967          | Weighted median           | 3 | 0.0308  | 0.0600 | 0.6080 | 0.0255  | 0.3164 | 0.9488 | 0.1535 | 0.6952 | 244.5812 |
| LargeArteryStroke | family. Rikenellaceae. id. 967          | Inverse variance weighted | 3 | 0.0328  | 0.0523 | 0.5311 | 0.0255  | 0.3164 | 0.9488 | 0.1535 | 0.6952 | 244.5812 |
| LargeArteryStroke | family. Rikenellaceae. id. 967          | Simple mode               | 3 | 0.0225  | 0.0674 | 0.7701 | 0.0255  | 0.3164 | 0.9488 | 0.1535 | 0.6952 | 244.5812 |
| LargeArteryStroke | family. Rikenellaceae. id. 967          | Weighted mode             | 3 | 0.0264  | 0.0701 | 0.7424 | 0.0255  | 0.3164 | 0.9488 | 0.1535 | 0.6952 | 244.5812 |
| LargeArteryStroke | family. Ruminococcaceae. id. 2050       | MR Egger                  | 3 | 2.4421  | 1.4065 | 0.3327 | -0.5223 | 0.3120 | 0.3428 | 2.8019 | 0.2464 | 53.5762  |
| LargeArteryStroke | family. Ruminococcaceae. id. 2050       | Weighted median           | 3 | 0.0905  | 0.0668 | 0.1756 | -0.5223 | 0.3120 | 0.3428 | 2.8019 | 0.2464 | 53.5762  |

|                   |                                                     |                           |   |         |        |        |         |        |        |        |        |          |
|-------------------|-----------------------------------------------------|---------------------------|---|---------|--------|--------|---------|--------|--------|--------|--------|----------|
| LargeArteryStroke | family. Ruminococcaceae. id. 2050                   | Inverse variance weighted | 3 | 0.0894  | 0.0608 | 0.1417 | -0.5223 | 0.3120 | 0.3428 | 2.8019 | 0.2464 | 53.5762  |
| LargeArteryStroke | family. Ruminococcaceae. id. 2050                   | Simple mode               | 3 | 0.1413  | 0.0926 | 0.2666 | -0.5223 | 0.3120 | 0.3428 | 2.8019 | 0.2464 | 53.5762  |
| LargeArteryStroke | family. Ruminococcaceae. id. 2050                   | Weighted mode             | 3 | 0.1113  | 0.0920 | 0.3501 | -0.5223 | 0.3120 | 0.3428 | 2.8019 | 0.2464 | 53.5762  |
| LargeArteryStroke | family. Streptococcaceae. id. 1850                  | MR Egger                  | 3 | -1.5273 | 1.5801 | 0.5108 | 0.3154  | 0.3506 | 0.5336 | 1.1612 | 0.2812 | 48.8413  |
| LargeArteryStroke | family. Streptococcaceae. id. 1850                  | Weighted median           | 3 | -0.0681 | 0.0696 | 0.3278 | 0.3154  | 0.3506 | 0.5336 | 1.1612 | 0.2812 | 48.8413  |
| LargeArteryStroke | family. Streptococcaceae. id. 1850                  | Inverse variance weighted | 3 | -0.1068 | 0.0551 | 0.0526 | 0.3154  | 0.3506 | 0.5336 | 1.1612 | 0.2812 | 48.8413  |
| LargeArteryStroke | family. Streptococcaceae. id. 1850                  | Simple mode               | 3 | -0.0581 | 0.0836 | 0.5589 | 0.3154  | 0.3506 | 0.5336 | 1.1612 | 0.2812 | 48.8413  |
| LargeArteryStroke | family. Streptococcaceae. id. 1850                  | Weighted mode             | 3 | -0.0595 | 0.0756 | 0.5136 | 0.3154  | 0.3506 | 0.5336 | 1.1612 | 0.2812 | 48.8413  |
| LargeArteryStroke | family. Veillonellaceae. id. 2172                   | MR Egger                  | 3 | -0.3749 | 1.5101 | 0.8451 | 0.0884  | 0.3350 | 0.8357 | 0.2067 | 0.6494 | 263.5756 |
| LargeArteryStroke | family. Veillonellaceae. id. 2172                   | Weighted median           | 3 | 0.0324  | 0.0653 | 0.6193 | 0.0884  | 0.3350 | 0.8357 | 0.2067 | 0.6494 | 263.5756 |
| LargeArteryStroke | family. Veillonellaceae. id. 2172                   | Inverse variance weighted | 3 | 0.0234  | 0.0552 | 0.6711 | 0.0884  | 0.3350 | 0.8357 | 0.2067 | 0.6494 | 263.5756 |
| LargeArteryStroke | family. Veillonellaceae. id. 2172                   | Simple mode               | 3 | 0.0399  | 0.0788 | 0.6632 | 0.0884  | 0.3350 | 0.8357 | 0.2067 | 0.6494 | 263.5756 |
| LargeArteryStroke | family. Veillonellaceae. id. 2172                   | Weighted mode             | 3 | 0.0422  | 0.0735 | 0.6235 | 0.0884  | 0.3350 | 0.8357 | 0.2067 | 0.6494 | 263.5756 |
| LargeArteryStroke | family. Verrucomicrobiaceae. id. 4036               | MR Egger                  | 1 | 1.8931  | 1.7164 | 0.4689 | -0.4008 | 0.3809 | 0.4838 | 1.4075 | 0.4947 | 57.4670  |
| LargeArteryStroke | family. Verrucomicrobiaceae. id. 4036               | Weighted median           | 3 | 0.0554  | 0.0744 | 0.4565 | -0.4008 | 0.3809 | 0.4838 | 1.4075 | 0.4947 | 57.4670  |
| LargeArteryStroke | family. Verrucomicrobiaceae. id. 4036               | Inverse variance weighted | 3 | 0.0883  | 0.0629 | 0.1604 | -0.4008 | 0.3809 | 0.4838 | 1.4075 | 0.4947 | 57.4670  |
| LargeArteryStroke | family. Verrucomicrobiaceae. id. 4036               | Simple mode               | 3 | 0.0445  | 0.0950 | 0.6854 | -0.4008 | 0.3809 | 0.4838 | 1.4075 | 0.4947 | 57.4670  |
| LargeArteryStroke | family. Verrucomicrobiaceae. id. 4036               | Weighted mode             | 3 | 0.0429  | 0.0940 | 0.6928 | -0.4008 | 0.3809 | 0.4838 | 1.4075 | 0.4947 | 57.4670  |
| LargeArteryStroke | family. Victivallaceae. id. 2255                    | MR Egger                  | 2 | 2.1501  | 3.0416 | 0.6083 | -0.4397 | 0.6737 | 0.6318 | 0.4660 | 0.7921 | 32.9960  |
| LargeArteryStroke | family. Victivallaceae. id. 2255                    | Weighted median           | 3 | 0.1901  | 0.1266 | 0.1330 | -0.4397 | 0.6737 | 0.6318 | 0.4660 | 0.7921 | 32.9960  |
| LargeArteryStroke | family. Victivallaceae. id. 2255                    | Inverse variance weighted | 3 | 0.1660  | 0.1108 | 0.1341 | -0.4397 | 0.6737 | 0.6318 | 0.4660 | 0.7921 | 32.9960  |
| LargeArteryStroke | family. Victivallaceae. id. 2255                    | Simple mode               | 3 | 0.2289  | 0.1589 | 0.2863 | -0.4397 | 0.6737 | 0.6318 | 0.4660 | 0.7921 | 32.9960  |
| LargeArteryStroke | family. Victivallaceae. id. 2255                    | Weighted mode             | 3 | 0.2274  | 0.1561 | 0.2824 | -0.4397 | 0.6737 | 0.6318 | 0.4660 | 0.7921 | 32.9960  |
| LargeArteryStroke | family. unknownfamily. id. 1000001214               | MR Egger                  | 3 | -0.6249 | 2.4524 | 0.8412 | 0.1377  | 0.5437 | 0.8421 | 0.1532 | 0.6955 | 192.0331 |
| LargeArteryStroke | family. unknownfamily. id. 1000001214               | Weighted median           | 3 | 0.0086  | 0.1055 | 0.9350 | 0.1377  | 0.5437 | 0.8421 | 0.1532 | 0.6955 | 192.0331 |
| LargeArteryStroke | family. unknownfamily. id. 1000001214               | Inverse variance weighted | 3 | -0.0042 | 0.0907 | 0.9629 | 0.1377  | 0.5437 | 0.8421 | 0.1532 | 0.6955 | 192.0331 |
| LargeArteryStroke | family. unknownfamily. id. 1000001214               | Simple mode               | 3 | 0.0205  | 0.1255 | 0.8851 | 0.1377  | 0.5437 | 0.8421 | 0.1532 | 0.6955 | 192.0331 |
| LargeArteryStroke | family. unknownfamily. id. 1000001214               | Weighted mode             | 3 | 0.0187  | 0.1233 | 0.8933 | 0.1377  | 0.5437 | 0.8421 | 0.1532 | 0.6955 | 192.0331 |
| LargeArteryStroke | family. unknownfamily. id. 1000005471               | MR Egger                  | 3 | 1.7732  | 1.8549 | 0.5143 | -0.3851 | 0.4115 | 0.5211 | 1.0225 | 0.5997 | 100.9836 |
| LargeArteryStroke | family. unknownfamily. id. 1000005471               | Weighted median           | 3 | 0.0790  | 0.0855 | 0.3554 | -0.3851 | 0.4115 | 0.5211 | 1.0225 | 0.5997 | 100.9836 |
| LargeArteryStroke | family. unknownfamily. id. 1000005471               | Inverse variance weighted | 3 | 0.0383  | 0.0683 | 0.5750 | -0.3851 | 0.4115 | 0.5211 | 1.0225 | 0.5997 | 100.9836 |
| LargeArteryStroke | family. unknownfamily. id. 1000005471               | Simple mode               | 3 | 0.0933  | 0.1025 | 0.4590 | -0.3851 | 0.4115 | 0.5211 | 1.0225 | 0.5997 | 100.9836 |
| LargeArteryStroke | family. unknownfamily. id. 1000005471               | Weighted mode             | 3 | 0.0933  | 0.1011 | 0.4535 | -0.3851 | 0.4115 | 0.5211 | 1.0225 | 0.5997 | 100.9836 |
| LargeArteryStroke | family. unknownfamily. id. 1000006161               | MR Egger                  | 3 | -0.8968 | 2.6218 | 0.7902 | 0.2080  | 0.5811 | 0.7812 | 0.7954 | 0.3725 | 75.4500  |
| LargeArteryStroke | family. unknownfamily. id. 1000006161               | Weighted median           | 3 | 0.0510  | 0.1210 | 0.6731 | 0.2080  | 0.5811 | 0.7812 | 0.7954 | 0.3725 | 75.4500  |
| LargeArteryStroke | family. unknownfamily. id. 1000006161               | Inverse variance weighted | 3 | 0.0411  | 0.0963 | 0.6696 | 0.2080  | 0.5811 | 0.7812 | 0.7954 | 0.3725 | 75.4500  |
| LargeArteryStroke | family. unknownfamily. id. 1000006161               | Simple mode               | 3 | 0.0650  | 0.1384 | 0.6846 | 0.2080  | 0.5811 | 0.7812 | 0.7954 | 0.3725 | 75.4500  |
| LargeArteryStroke | family. unknownfamily. id. 1000006161               | Weighted mode             | 3 | 0.0665  | 0.1336 | 0.6678 | 0.2080  | 0.5811 | 0.7812 | 0.7954 | 0.3725 | 75.4500  |
| LargeArteryStroke | genus. Clostridiuminnocuumbgroup. id. 14397         | MR Egger                  | 3 | -3.4899 | 3.9381 | 0.5384 | 0.7451  | 0.8739 | 0.5505 | 1.8137 | 0.1781 | 25.3103  |
| LargeArteryStroke | genus. Clostridiuminnocuumbgroup. id. 14397         | Weighted median           | 3 | -0.1121 | 0.1365 | 0.4117 | 0.7451  | 0.8739 | 0.5505 | 1.8137 | 0.1781 | 25.3103  |
| LargeArteryStroke | genus. Clostridiuminnocuumbgroup. id. 14397         | Inverse variance weighted | 3 | -0.1343 | 0.1345 | 0.3179 | 0.7451  | 0.8739 | 0.5505 | 1.8137 | 0.1781 | 25.3103  |
| LargeArteryStroke | genus. Clostridiuminnocuumbgroup. id. 14397         | Simple mode               | 3 | -0.1330 | 0.1917 | 0.5595 | 0.7451  | 0.8739 | 0.5505 | 1.8137 | 0.1781 | 25.3103  |
| LargeArteryStroke | genus. Clostridiuminnocuumbgroup. id. 14397         | Weighted mode             | 3 | -0.0440 | 0.1992 | 0.8458 | 0.7451  | 0.8739 | 0.5505 | 1.8137 | 0.1781 | 25.3103  |
| LargeArteryStroke | genus. Eubacteriumbrachygroup. id. 11296            | MR Egger                  | 3 | -0.4333 | 3.4029 | 0.9194 | 0.1208  | 0.7552 | 0.8990 | 1.3551 | 0.2444 | 40.5160  |
| LargeArteryStroke | genus. Eubacteriumbrachygroup. id. 11296            | Weighted median           | 3 | 0.1792  | 0.1350 | 0.1845 | 0.1208  | 0.7552 | 0.8990 | 1.3551 | 0.2444 | 40.5160  |
| LargeArteryStroke | genus. Eubacteriumbrachygroup. id. 11296            | Inverse variance weighted | 3 | 0.1105  | 0.1091 | 0.3110 | 0.1208  | 0.7552 | 0.8990 | 1.3551 | 0.2444 | 40.5160  |
| LargeArteryStroke | genus. Eubacteriumbrachygroup. id. 11296            | Simple mode               | 3 | 0.1991  | 0.1660 | 0.3533 | 0.1208  | 0.7552 | 0.8990 | 1.3551 | 0.2444 | 40.5160  |
| LargeArteryStroke | genus. Eubacteriumbrachygroup. id. 11296            | Weighted mode             | 3 | 0.1976  | 0.1685 | 0.3617 | 0.1208  | 0.7552 | 0.8990 | 1.3551 | 0.2444 | 40.5160  |
| LargeArteryStroke | genus. Eubacteriumcoprostanoligenesgroup. id. 11375 | MR Egger                  | 3 | 0.0361  | 1.4396 | 0.9840 | 0.0186  | 0.3194 | 0.9630 | 0.1685 | 0.6814 | 63.4307  |
| LargeArteryStroke | genus. Eubacteriumcoprostanoligenesgroup. id. 11375 | Weighted median           | 3 | 0.1158  | 0.0632 | 0.0669 | 0.0186  | 0.3194 | 0.9630 | 0.1685 | 0.6814 | 63.4307  |
| LargeArteryStroke | genus. Eubacteriumcoprostanoligenesgroup. id. 11375 | Inverse variance weighted | 3 | 0.1198  | 0.0526 | 0.0228 | 0.0186  | 0.3194 | 0.9630 | 0.1685 | 0.6814 | 63.4307  |
| LargeArteryStroke | genus. Eubacteriumcoprostanoligenesgroup. id. 11375 | Simple mode               | 3 | 0.1073  | 0.0750 | 0.2890 | 0.0186  | 0.3194 | 0.9630 | 0.1685 | 0.6814 | 63.4307  |
| LargeArteryStroke | genus. Eubacteriumcoprostanoligenesgroup. id. 11375 | Weighted mode             | 3 | 0.1100  | 0.0739 | 0.2752 | 0.0186  | 0.3194 | 0.9630 | 0.1685 | 0.6814 | 63.4307  |
| LargeArteryStroke | genus. Eubacteriumeligensgroup. id. 14372           | MR Egger                  | 2 | 2.0576  | 1.5655 | 0.4141 | -0.4529 | 0.3472 | 0.4164 | 1.8489 | 0.3968 | 93.7998  |
| LargeArteryStroke | genus. Eubacteriumeligensgroup. id. 14372           | Weighted median           | 3 | -0.0012 | 0.0727 | 0.9870 | -0.4529 | 0.3472 | 0.4164 | 1.8489 | 0.3968 | 93.7998  |
| LargeArteryStroke | genus. Eubacteriumeligensgroup. id. 14372           | Inverse variance weighted | 3 | 0.0169  | 0.0574 | 0.7684 | -0.4529 | 0.3472 | 0.4164 | 1.8489 | 0.3968 | 93.7998  |
| LargeArteryStroke | genus. Eubacteriumeligensgroup. id. 14372           | Simple mode               | 3 | -0.0114 | 0.0845 | 0.9048 | -0.4529 | 0.3472 | 0.4164 | 1.8489 | 0.3968 | 93.7998  |
| LargeArteryStroke | genus. Eubacteriumeligensgroup. id. 14372           | Weighted mode             | 3 | -0.0187 | 0.0905 | 0.8553 | -0.4529 | 0.3472 | 0.4164 | 1.8489 | 0.3968 | 93.7998  |

|                   |                                                 |                           |   |         |        |        |         |        |        |        |        |          |
|-------------------|-------------------------------------------------|---------------------------|---|---------|--------|--------|---------|--------|--------|--------|--------|----------|
| LargeArteryStroke | genus..Eubacteriumfissicatenagroup. id. 14373   | MR Egger                  | 3 | 1.6180  | 3.0545 | 0.6899 | -0.3482 | 0.6773 | 0.6977 | 0.2084 | 0.6481 | 75.7530  |
| LargeArteryStroke | genus..Eubacteriumfissicatenagroup. id. 14373   | Weighted median           | 3 | 0.0039  | 0.1308 | 0.9759 | -0.3482 | 0.6773 | 0.6977 | 0.2084 | 0.6481 | 75.7530  |
| LargeArteryStroke | genus..Eubacteriumfissicatenagroup. id. 14373   | Inverse variance weighted | 3 | 0.0487  | 0.1133 | 0.6670 | -0.3482 | 0.6773 | 0.6977 | 0.2084 | 0.6481 | 75.7530  |
| LargeArteryStroke | genus..Eubacteriumfissicatenagroup. id. 14373   | Simple mode               | 3 | -0.0005 | 0.1590 | 0.9979 | -0.3482 | 0.6773 | 0.6977 | 0.2084 | 0.6481 | 75.7530  |
| LargeArteryStroke | genus..Eubacteriumfissicatenagroup. id. 14373   | Weighted mode             | 3 | 0.0000  | 0.1482 | 1.0000 | -0.3482 | 0.6773 | 0.6977 | 0.2084 | 0.6481 | 75.7530  |
| LargeArteryStroke | genus..Eubacteriumhalliigroup. id. 11338        | MR Egger                  | 3 | -2.4745 | 1.4705 | 0.3414 | 0.5443  | 0.3263 | 0.3438 | 3.3485 | 0.1874 | 69.1278  |
| LargeArteryStroke | genus..Eubacteriumhalliigroup. id. 11338        | Weighted median           | 3 | 0.0150  | 0.0715 | 0.8342 | 0.5443  | 0.3263 | 0.3438 | 3.3485 | 0.1874 | 69.1278  |
| LargeArteryStroke | genus..Eubacteriumhalliigroup. id. 11338        | Inverse variance weighted | 3 | -0.0230 | 0.0698 | 0.7420 | 0.5443  | 0.3263 | 0.3438 | 3.3485 | 0.1874 | 69.1278  |
| LargeArteryStroke | genus..Eubacteriumhalliigroup. id. 11338        | Simple mode               | 3 | 0.0342  | 0.0884 | 0.7359 | 0.5443  | 0.3263 | 0.3438 | 3.3485 | 0.1874 | 69.1278  |
| LargeArteryStroke | genus..Eubacteriumhalliigroup. id. 11338        | Weighted mode             | 3 | 0.0367  | 0.0788 | 0.6870 | 0.5443  | 0.3263 | 0.3438 | 3.3485 | 0.1874 | 69.1278  |
| LargeArteryStroke | genus..Eubacteriumnodatumgroup. id. 11297       | MR Egger                  | 3 | 0.6121  | 3.1998 | 0.8797 | -0.1680 | 0.7102 | 0.8521 | 0.1073 | 0.7433 | 48.8866  |
| LargeArteryStroke | genus..Eubacteriumnodatumgroup. id. 11297       | Weighted median           | 3 | -0.1612 | 0.1410 | 0.2528 | -0.1680 | 0.7102 | 0.8521 | 0.1073 | 0.7433 | 48.8866  |
| LargeArteryStroke | genus..Eubacteriumnodatumgroup. id. 11297       | Inverse variance weighted | 3 | -0.1444 | 0.1179 | 0.2206 | -0.1680 | 0.7102 | 0.8521 | 0.1073 | 0.7433 | 48.8866  |
| LargeArteryStroke | genus..Eubacteriumnodatumgroup. id. 11297       | Simple mode               | 3 | -0.1739 | 0.1729 | 0.4203 | -0.1680 | 0.7102 | 0.8521 | 0.1073 | 0.7433 | 48.8866  |
| LargeArteryStroke | genus..Eubacteriumnodatumgroup. id. 11297       | Weighted mode             | 3 | -0.1727 | 0.1604 | 0.3943 | -0.1680 | 0.7102 | 0.8521 | 0.1073 | 0.7433 | 48.8866  |
| LargeArteryStroke | genus..Eubacteriumoxidoreducensgroup. id. 11339 | MR Egger                  | 3 | 2.5046  | 2.9466 | 0.5515 | -0.5357 | 0.6535 | 0.5629 | 1.2718 | 0.2594 | 37.3772  |
| LargeArteryStroke | genus..Eubacteriumoxidoreducensgroup. id. 11339 | Weighted median           | 3 | 0.0705  | 0.1234 | 0.5677 | -0.5357 | 0.6535 | 0.5629 | 1.2718 | 0.2594 | 37.3772  |
| LargeArteryStroke | genus..Eubacteriumoxidoreducensgroup. id. 11339 | Inverse variance weighted | 3 | 0.0910  | 0.1014 | 0.3696 | -0.5357 | 0.6535 | 0.5629 | 1.2718 | 0.2594 | 37.3772  |
| LargeArteryStroke | genus..Eubacteriumoxidoreducensgroup. id. 11339 | Simple mode               | 3 | 0.0749  | 0.1567 | 0.6797 | -0.5357 | 0.6535 | 0.5629 | 1.2718 | 0.2594 | 37.3772  |
| LargeArteryStroke | genus..Eubacteriumoxidoreducensgroup. id. 11339 | Weighted mode             | 3 | 0.0235  | 0.1557 | 0.8939 | -0.5357 | 0.6535 | 0.5629 | 1.2718 | 0.2594 | 37.3772  |
| LargeArteryStroke | genus..Eubacteriumrectalegroup. id. 14374       | MR Egger                  | 3 | -1.4930 | 2.0722 | 0.6025 | 0.3053  | 0.4597 | 0.6268 | 2.0657 | 0.1506 | 47.3322  |
| LargeArteryStroke | genus..Eubacteriumrectalegroup. id. 14374       | Weighted median           | 3 | -0.0890 | 0.0701 | 0.2041 | 0.3053  | 0.4597 | 0.6268 | 2.0657 | 0.1506 | 47.3322  |
| LargeArteryStroke | genus..Eubacteriumrectalegroup. id. 14374       | Inverse variance weighted | 3 | -0.1179 | 0.0643 | 0.0666 | 0.3053  | 0.4597 | 0.6268 | 2.0657 | 0.1506 | 47.3322  |
| LargeArteryStroke | genus..Eubacteriumrectalegroup. id. 14374       | Simple mode               | 3 | -0.0784 | 0.0918 | 0.4834 | 0.3053  | 0.4597 | 0.6268 | 2.0657 | 0.1506 | 47.3322  |
| LargeArteryStroke | genus..Eubacteriumrectalegroup. id. 14374       | Weighted mode             | 3 | -0.0624 | 0.0921 | 0.5676 | 0.3053  | 0.4597 | 0.6268 | 2.0657 | 0.1506 | 47.3322  |
| LargeArteryStroke | genus..Eubacteriumruminantiumgroup. id. 11340   | MR Egger                  | 3 | -1.2916 | 2.1884 | 0.6606 | 0.2891  | 0.4852 | 0.6579 | 0.3797 | 0.8271 | 175.9539 |
| LargeArteryStroke | genus..Eubacteriumruminantiumgroup. id. 11340   | Weighted median           | 3 | 0.0209  | 0.0895 | 0.8155 | 0.2891  | 0.4852 | 0.6579 | 0.3797 | 0.8271 | 175.9539 |
| LargeArteryStroke | genus..Eubacteriumruminantiumgroup. id. 11340   | Inverse variance weighted | 3 | 0.0115  | 0.0803 | 0.8859 | 0.2891  | 0.4852 | 0.6579 | 0.3797 | 0.8271 | 175.9539 |
| LargeArteryStroke | genus..Eubacteriumruminantiumgroup. id. 11340   | Simple mode               | 3 | 0.0269  | 0.1113 | 0.8318 | 0.2891  | 0.4852 | 0.6579 | 0.3797 | 0.8271 | 175.9539 |
| LargeArteryStroke | genus..Eubacteriumruminantiumgroup. id. 11340   | Weighted mode             | 3 | 0.0338  | 0.1112 | 0.7899 | 0.2891  | 0.4852 | 0.6579 | 0.3797 | 0.8271 | 175.9539 |
| LargeArteryStroke | genus..Eubacteriumventriosumgroup. id. 11341    | MR Egger                  | 3 | -1.6551 | 3.4903 | 0.7181 | 0.3766  | 0.7745 | 0.7119 | 5.2208 | 0.0223 | 50.7280  |
| LargeArteryStroke | genus..Eubacteriumventriosumgroup. id. 11341    | Weighted median           | 3 | 0.0981  | 0.0829 | 0.2370 | 0.3766  | 0.7745 | 0.7119 | 5.2208 | 0.0223 | 50.7280  |
| LargeArteryStroke | genus..Eubacteriumventriosumgroup. id. 11341    | Inverse variance weighted | 3 | 0.0409  | 0.1011 | 0.6861 | 0.3766  | 0.7745 | 0.7119 | 5.2208 | 0.0223 | 50.7280  |
| LargeArteryStroke | genus..Eubacteriumventriosumgroup. id. 11341    | Simple mode               | 3 | 0.1325  | 0.1097 | 0.3506 | 0.3766  | 0.7745 | 0.7119 | 5.2208 | 0.0223 | 50.7280  |
| LargeArteryStroke | genus..Eubacteriumventriosumgroup. id. 11341    | Weighted mode             | 3 | 0.1392  | 0.1015 | 0.3039 | 0.3766  | 0.7745 | 0.7119 | 5.2208 | 0.0223 | 50.7280  |
| LargeArteryStroke | genus..Eubacteriumxylanophilumgroup. id. 14375  | MR Egger                  | 3 | 1.5547  | 1.6188 | 0.5129 | -0.3514 | 0.3592 | 0.5070 | 1.2517 | 0.5348 | 118.5169 |
| LargeArteryStroke | genus..Eubacteriumxylanophilumgroup. id. 14375  | Weighted median           | 3 | -0.0583 | 0.0728 | 0.4234 | -0.3514 | 0.3592 | 0.5070 | 1.2517 | 0.5348 | 118.5169 |
| LargeArteryStroke | genus..Eubacteriumxylanophilumgroup. id. 14375  | Inverse variance weighted | 3 | -0.0277 | 0.0597 | 0.6428 | -0.3514 | 0.3592 | 0.5070 | 1.2517 | 0.5348 | 118.5169 |
| LargeArteryStroke | genus..Eubacteriumxylanophilumgroup. id. 14375  | Simple mode               | 3 | -0.0682 | 0.0845 | 0.5044 | -0.3514 | 0.3592 | 0.5070 | 1.2517 | 0.5348 | 118.5169 |
| LargeArteryStroke | genus..Eubacteriumxylanophilumgroup. id. 14375  | Weighted mode             | 3 | -0.0688 | 0.0818 | 0.4885 | -0.3514 | 0.3592 | 0.5070 | 1.2517 | 0.5348 | 118.5169 |
| LargeArteryStroke | genus..Ruminococcusgavreauiigroup. id. 11342    | MR Egger                  | 3 | -1.1995 | 1.6295 | 0.5960 | 0.2420  | 0.3615 | 0.6244 | 0.4492 | 0.7988 | 61.0216  |
| LargeArteryStroke | genus..Ruminococcusgavreauiigroup. id. 11342    | Weighted median           | 3 | -0.1135 | 0.0728 | 0.1192 | 0.2420  | 0.3615 | 0.6244 | 0.4492 | 0.7988 | 61.0216  |
| LargeArteryStroke | genus..Ruminococcusgavreauiigroup. id. 11342    | Inverse variance weighted | 3 | -0.1093 | 0.0600 | 0.0688 | 0.2420  | 0.3615 | 0.6244 | 0.4492 | 0.7988 | 61.0216  |
| LargeArteryStroke | genus..Ruminococcusgavreauiigroup. id. 11342    | Simple mode               | 3 | -0.1350 | 0.0862 | 0.2579 | 0.2420  | 0.3615 | 0.6244 | 0.4492 | 0.7988 | 61.0216  |
| LargeArteryStroke | genus..Ruminococcusgavreauiigroup. id. 11342    | Weighted mode             | 3 | -0.1283 | 0.0889 | 0.2856 | 0.2420  | 0.3615 | 0.6244 | 0.4492 | 0.7988 | 61.0216  |
| LargeArteryStroke | genus..Ruminococcusgnavusgroup. id. 14376       | MR Egger                  | 3 | 2.5408  | 2.3891 | 0.4804 | -0.5723 | 0.5300 | 0.4756 | 1.2099 | 0.5461 | 85.2159  |
| LargeArteryStroke | genus..Ruminococcusgnavusgroup. id. 14376       | Weighted median           | 3 | -0.0070 | 0.1066 | 0.9477 | -0.5723 | 0.5300 | 0.4756 | 1.2099 | 0.5461 | 85.2159  |
| LargeArteryStroke | genus..Ruminococcusgnavusgroup. id. 14376       | Inverse variance weighted | 3 | -0.0372 | 0.0874 | 0.6702 | -0.5723 | 0.5300 | 0.4756 | 1.2099 | 0.5461 | 85.2159  |
| LargeArteryStroke | genus..Ruminococcusgnavusgroup. id. 14376       | Simple mode               | 3 | 0.0398  | 0.1261 | 0.7821 | -0.5723 | 0.5300 | 0.4756 | 1.2099 | 0.5461 | 85.2159  |
| LargeArteryStroke | genus..Ruminococcusgnavusgroup. id. 14376       | Weighted mode             | 3 | 0.0358  | 0.1336 | 0.8136 | -0.5723 | 0.5300 | 0.4756 | 1.2099 | 0.5461 | 85.2159  |
| LargeArteryStroke | genus..Ruminococcustorquesgroup. id. 14377      | MR Egger                  | 3 | -0.9116 | 1.4241 | 0.6375 | 0.2117  | 0.3159 | 0.6242 | 0.1594 | 0.6897 | 162.3913 |
| LargeArteryStroke | genus..Ruminococcustorquesgroup. id. 14377      | Weighted median           | 3 | 0.0609  | 0.0611 | 0.3192 | 0.2117  | 0.3159 | 0.6242 | 0.1594 | 0.6897 | 162.3913 |
| LargeArteryStroke | genus..Ruminococcustorquesgroup. id. 14377      | Inverse variance weighted | 3 | 0.0418  | 0.0521 | 0.4228 | 0.2117  | 0.3159 | 0.6242 | 0.1594 | 0.6897 | 162.3913 |
| LargeArteryStroke | genus..Ruminococcustorquesgroup. id. 14377      | Simple mode               | 3 | 0.0660  | 0.0729 | 0.4606 | 0.2117  | 0.3159 | 0.6242 | 0.1594 | 0.6897 | 162.3913 |
| LargeArteryStroke | genus..Ruminococcustorquesgroup. id. 14377      | Weighted mode             | 3 | 0.0664  | 0.0712 | 0.4494 | 0.2117  | 0.3159 | 0.6242 | 0.1594 | 0.6897 | 162.3913 |
| LargeArteryStroke | genus.Actinomyces. id. 423                      | MR Egger                  | 3 | -0.5829 | 2.6240 | 0.8608 | 0.1317  | 0.5830 | 0.8586 | 1.5256 | 0.2168 | 76.0831  |
| LargeArteryStroke | genus.Actinomyces. id. 423                      | Weighted median           | 3 | -0.0042 | 0.0986 | 0.9662 | 0.1317  | 0.5830 | 0.8586 | 1.5256 | 0.2168 | 76.0831  |
| LargeArteryStroke | genus.Actinomyces. id. 423                      | Inverse variance weighted | 3 | 0.0094  | 0.0784 | 0.9044 | 0.1317  | 0.5830 | 0.8586 | 1.5256 | 0.2168 | 76.0831  |

|                   |                                 |                           |   |         |        |        |         |        |        |        |        |          |
|-------------------|---------------------------------|---------------------------|---|---------|--------|--------|---------|--------|--------|--------|--------|----------|
| LargeArteryStroke | genus. Actinomyces. id. 423     | Simple mode               | 3 | -0.0376 | 0.1144 | 0.7738 | 0.1317  | 0.5830 | 0.8586 | 1.5256 | 0.2168 | 76.0831  |
| LargeArteryStroke | genus. Actinomyces. id. 423     | Weighted mode             | 3 | -0.0268 | 0.1142 | 0.8364 | 0.1317  | 0.5830 | 0.8586 | 1.5256 | 0.2168 | 76.0831  |
| LargeArteryStroke | genus. Adlercreutzia. id. 812   | MR Egger                  | 3 | -1.7159 | 2.0158 | 0.5510 | 0.3431  | 0.4479 | 0.5838 | 0.6341 | 0.7283 | 34.4033  |
| LargeArteryStroke | genus. Adlercreutzia. id. 812   | Weighted median           | 3 | -0.1940 | 0.0902 | 0.0315 | 0.3431  | 0.4479 | 0.5838 | 0.6341 | 0.7283 | 34.4033  |
| LargeArteryStroke | genus. Adlercreutzia. id. 812   | Inverse variance weighted | 3 | -0.1725 | 0.0745 | 0.0206 | 0.3431  | 0.4479 | 0.5838 | 0.6341 | 0.7283 | 34.4033  |
| LargeArteryStroke | genus. Adlercreutzia. id. 812   | Simple mode               | 3 | -0.2181 | 0.1108 | 0.1878 | 0.3431  | 0.4479 | 0.5838 | 0.6341 | 0.7283 | 34.4033  |
| LargeArteryStroke | genus. Adlercreutzia. id. 812   | Weighted mode             | 3 | -0.2177 | 0.1058 | 0.1760 | 0.3431  | 0.4479 | 0.5838 | 0.6341 | 0.7283 | 34.4033  |
| LargeArteryStroke | genus. Akkermansia. id. 4037    | MR Egger                  | 3 | 1.9154  | 1.7165 | 0.4652 | -0.4059 | 0.3809 | 0.4798 | 1.4231 | 0.4909 | 57.5920  |
| LargeArteryStroke | genus. Akkermansia. id. 4037    | Weighted median           | 3 | 0.0556  | 0.0779 | 0.4759 | -0.4059 | 0.3809 | 0.4798 | 1.4231 | 0.4909 | 57.5920  |
| LargeArteryStroke | genus. Akkermansia. id. 4037    | Inverse variance weighted | 3 | 0.0877  | 0.0629 | 0.1635 | -0.4059 | 0.3809 | 0.4798 | 1.4231 | 0.4909 | 57.5920  |
| LargeArteryStroke | genus. Akkermansia. id. 4037    | Simple mode               | 3 | 0.0435  | 0.0951 | 0.6920 | -0.4059 | 0.3809 | 0.4798 | 1.4231 | 0.4909 | 57.5920  |
| LargeArteryStroke | genus. Akkermansia. id. 4037    | Weighted mode             | 3 | 0.0419  | 0.0920 | 0.6937 | -0.4059 | 0.3809 | 0.4798 | 1.4231 | 0.4909 | 57.5920  |
| LargeArteryStroke | genus. Alistipes. id. 968       | MR Egger                  | 3 | -1.3573 | 1.4300 | 0.5166 | 0.3144  | 0.3173 | 0.5028 | 0.5705 | 0.4501 | 98.3351  |
| LargeArteryStroke | genus. Alistipes. id. 968       | Weighted median           | 3 | 0.0973  | 0.0663 | 0.1422 | 0.3144  | 0.3173 | 0.5028 | 0.5705 | 0.4501 | 98.3351  |
| LargeArteryStroke | genus. Alistipes. id. 968       | Inverse variance weighted | 3 | 0.0590  | 0.0525 | 0.2604 | 0.3144  | 0.3173 | 0.5028 | 0.5705 | 0.4501 | 98.3351  |
| LargeArteryStroke | genus. Alistipes. id. 968       | Simple mode               | 3 | 0.0993  | 0.0771 | 0.3266 | 0.3144  | 0.3173 | 0.5028 | 0.5705 | 0.4501 | 98.3351  |
| LargeArteryStroke | genus. Alistipes. id. 968       | Weighted mode             | 3 | 0.0996  | 0.0757 | 0.3188 | 0.3144  | 0.3173 | 0.5028 | 0.5705 | 0.4501 | 98.3351  |
| LargeArteryStroke | genus. Anaerofilum. id. 2053    | MR Egger                  | 3 | -2.2907 | 3.4521 | 0.6270 | 0.5361  | 0.7666 | 0.6115 | 1.7522 | 0.1856 | 33.5098  |
| LargeArteryStroke | genus. Anaerofilum. id. 2053    | Weighted median           | 3 | 0.1716  | 0.1312 | 0.1907 | 0.5361  | 0.7666 | 0.6115 | 1.7522 | 0.1856 | 33.5098  |
| LargeArteryStroke | genus. Anaerofilum. id. 2053    | Inverse variance weighted | 3 | 0.1217  | 0.1094 | 0.2663 | 0.5361  | 0.7666 | 0.6115 | 1.7522 | 0.1856 | 33.5098  |
| LargeArteryStroke | genus. Anaerofilum. id. 2053    | Simple mode               | 3 | 0.2168  | 0.1466 | 0.2773 | 0.5361  | 0.7666 | 0.6115 | 1.7522 | 0.1856 | 33.5098  |
| LargeArteryStroke | genus. Anaerofilum. id. 2053    | Weighted mode             | 3 | 0.2107  | 0.1547 | 0.3063 | 0.5361  | 0.7666 | 0.6115 | 1.7522 | 0.1856 | 33.5098  |
| LargeArteryStroke | genus. Anaerostipes. id. 1991   | MR Egger                  | 3 | -0.2537 | 1.4590 | 0.8904 | 0.0403  | 0.3237 | 0.9211 | 0.9246 | 0.3363 | 86.3826  |
| LargeArteryStroke | genus. Anaerostipes. id. 1991   | Weighted median           | 3 | -0.0788 | 0.0650 | 0.2260 | 0.0403  | 0.3237 | 0.9211 | 0.9246 | 0.3363 | 86.3826  |
| LargeArteryStroke | genus. Anaerostipes. id. 1991   | Inverse variance weighted | 3 | -0.0721 | 0.0536 | 0.1782 | 0.0403  | 0.3237 | 0.9211 | 0.9246 | 0.3363 | 86.3826  |
| LargeArteryStroke | genus. Anaerostipes. id. 1991   | Simple mode               | 3 | -0.1022 | 0.0775 | 0.3181 | 0.0403  | 0.3237 | 0.9211 | 0.9246 | 0.3363 | 86.3826  |
| LargeArteryStroke | genus. Anaerostipes. id. 1991   | Weighted mode             | 3 | -0.0941 | 0.0752 | 0.3374 | 0.0403  | 0.3237 | 0.9211 | 0.9246 | 0.3363 | 86.3826  |
| LargeArteryStroke | genus. Anaerotruncus. id. 2054  | MR Egger                  | 3 | 1.8914  | 1.4700 | 0.4206 | -0.4312 | 0.3261 | 0.4122 | 2.1176 | 0.3469 | 99.6590  |
| LargeArteryStroke | genus. Anaerotruncus. id. 2054  | Weighted median           | 3 | 0.0007  | 0.0708 | 0.9921 | -0.4312 | 0.3261 | 0.4122 | 2.1176 | 0.3469 | 99.6590  |
| LargeArteryStroke | genus. Anaerotruncus. id. 2054  | Inverse variance weighted | 3 | -0.0511 | 0.0555 | 0.3570 | -0.4312 | 0.3261 | 0.4122 | 2.1176 | 0.3469 | 99.6590  |
| LargeArteryStroke | genus. Anaerotruncus. id. 2054  | Simple mode               | 3 | 0.0104  | 0.0894 | 0.9181 | -0.4312 | 0.3261 | 0.4122 | 2.1176 | 0.3469 | 99.6590  |
| LargeArteryStroke | genus. Anaerotruncus. id. 2054  | Weighted mode             | 3 | 0.0108  | 0.0878 | 0.9130 | -0.4312 | 0.3261 | 0.4122 | 2.1176 | 0.3469 | 99.6590  |
| LargeArteryStroke | genus. Bacteroides. id. 918     | MR Egger                  | 3 | -1.1459 | 1.4077 | 0.5650 | 0.2277  | 0.3123 | 0.5989 | 0.5326 | 0.7662 | 55.5445  |
| LargeArteryStroke | genus. Bacteroides. id. 918     | Weighted median           | 3 | -0.1199 | 0.0626 | 0.0554 | 0.2277  | 0.3123 | 0.5989 | 0.5326 | 0.7662 | 55.5445  |
| LargeArteryStroke | genus. Bacteroides. id. 918     | Inverse variance weighted | 3 | -0.1199 | 0.0514 | 0.0197 | 0.2277  | 0.3123 | 0.5989 | 0.5326 | 0.7662 | 55.5445  |
| LargeArteryStroke | genus. Bacteroides. id. 918     | Simple mode               | 3 | -0.1399 | 0.0736 | 0.1974 | 0.2277  | 0.3123 | 0.5989 | 0.5326 | 0.7662 | 55.5445  |
| LargeArteryStroke | genus. Bacteroides. id. 918     | Weighted mode             | 3 | -0.1227 | 0.0758 | 0.2468 | 0.2277  | 0.3123 | 0.5989 | 0.5326 | 0.7662 | 55.5445  |
| LargeArteryStroke | genus. Barnesiella. id. 944     | MR Egger                  | 3 | 1.0975  | 1.5757 | 0.6127 | -0.2442 | 0.3497 | 0.6119 | 0.5163 | 0.7725 | 213.2421 |
| LargeArteryStroke | genus. Barnesiella. id. 944     | Weighted median           | 3 | -0.0090 | 0.0711 | 0.8988 | -0.2442 | 0.3497 | 0.6119 | 0.5163 | 0.7725 | 213.2421 |
| LargeArteryStroke | genus. Barnesiella. id. 944     | Inverse variance weighted | 3 | -0.0021 | 0.0579 | 0.9715 | -0.2442 | 0.3497 | 0.6119 | 0.5163 | 0.7725 | 213.2421 |
| LargeArteryStroke | genus. Barnesiella. id. 944     | Simple mode               | 3 | -0.0141 | 0.0813 | 0.8786 | -0.2442 | 0.3497 | 0.6119 | 0.5163 | 0.7725 | 213.2421 |
| LargeArteryStroke | genus. Barnesiella. id. 944     | Weighted mode             | 3 | -0.0199 | 0.0792 | 0.8255 | -0.2442 | 0.3497 | 0.6119 | 0.5163 | 0.7725 | 213.2421 |
| LargeArteryStroke | genus. Bifidobacterium. id. 436 | MR Egger                  | 3 | -2.6751 | 1.5605 | 0.3362 | 0.6068  | 0.3463 | 0.3301 | 3.0866 | 0.2137 | 73.0018  |
| LargeArteryStroke | genus. Bifidobacterium. id. 436 | Weighted median           | 3 | 0.0516  | 0.0814 | 0.5264 | 0.6068  | 0.3463 | 0.3301 | 3.0866 | 0.2137 | 73.0018  |
| LargeArteryStroke | genus. Bifidobacterium. id. 436 | Inverse variance weighted | 3 | 0.0578  | 0.0710 | 0.4160 | 0.6068  | 0.3463 | 0.3301 | 3.0866 | 0.2137 | 73.0018  |
| LargeArteryStroke | genus. Bifidobacterium. id. 436 | Simple mode               | 3 | 0.0147  | 0.1001 | 0.8969 | 0.6068  | 0.3463 | 0.3301 | 3.0866 | 0.2137 | 73.0018  |
| LargeArteryStroke | genus. Bifidobacterium. id. 436 | Weighted mode             | 3 | 0.0424  | 0.0948 | 0.6988 | 0.6068  | 0.3463 | 0.3301 | 3.0866 | 0.2137 | 73.0018  |
| LargeArteryStroke | genus. Bilophila. id. 3170      | MR Egger                  | 3 | -0.1952 | 1.6759 | 0.9262 | 0.0233  | 0.3719 | 0.9602 | 0.3137 | 0.5754 | 79.3762  |
| LargeArteryStroke | genus. Bilophila. id. 3170      | Weighted median           | 3 | -0.0954 | 0.0733 | 0.1930 | 0.0233  | 0.3719 | 0.9602 | 0.3137 | 0.5754 | 79.3762  |
| LargeArteryStroke | genus. Bilophila. id. 3170      | Inverse variance weighted | 3 | -0.0904 | 0.0611 | 0.1388 | 0.0233  | 0.3719 | 0.9602 | 0.3137 | 0.5754 | 79.3762  |
| LargeArteryStroke | genus. Bilophila. id. 3170      | Simple mode               | 3 | -0.1115 | 0.0877 | 0.3317 | 0.0233  | 0.3719 | 0.9602 | 0.3137 | 0.5754 | 79.3762  |
| LargeArteryStroke | genus. Bilophila. id. 3170      | Weighted mode             | 3 | -0.1062 | 0.0753 | 0.2937 | 0.0233  | 0.3719 | 0.9602 | 0.3137 | 0.5754 | 79.3762  |
| LargeArteryStroke | genus. Blautia. id. 1992        | MR Egger                  | 3 | -1.8016 | 1.6410 | 0.4703 | 0.3949  | 0.3640 | 0.4741 | 2.9567 | 0.2280 | 76.1292  |
| LargeArteryStroke | genus. Blautia. id. 1992        | Weighted median           | 3 | 0.0279  | 0.0659 | 0.6726 | 0.3949  | 0.3640 | 0.4741 | 2.9567 | 0.2280 | 76.1292  |
| LargeArteryStroke | genus. Blautia. id. 1992        | Inverse variance weighted | 3 | -0.0225 | 0.0626 | 0.7195 | 0.3949  | 0.3640 | 0.4741 | 2.9567 | 0.2280 | 76.1292  |
| LargeArteryStroke | genus. Blautia. id. 1992        | Simple mode               | 3 | 0.0316  | 0.0800 | 0.7313 | 0.3949  | 0.3640 | 0.4741 | 2.9567 | 0.2280 | 76.1292  |
| LargeArteryStroke | genus. Blautia. id. 1992        | Weighted mode             | 3 | 0.0316  | 0.0752 | 0.7156 | 0.3949  | 0.3640 | 0.4741 | 2.9567 | 0.2280 | 76.1292  |
| LargeArteryStroke | genus. Butyricicoccus. id. 2055 | MR Egger                  | 3 | -0.5139 | 1.4435 | 0.7823 | 0.1110  | 0.3204 | 0.7876 | 0.5916 | 0.4418 | 172.9694 |

|                   |                                                |                           |   |         |        |        |         |        |        |        |        |          |
|-------------------|------------------------------------------------|---------------------------|---|---------|--------|--------|---------|--------|--------|--------|--------|----------|
| LargeArteryStroke | genus. Butyricicoccus. id. 2055                | Weighted median           | 3 | -0.0071 | 0.0617 | 0.9078 | 0.1110  | 0.3204 | 0.7876 | 0.5916 | 0.4418 | 172.9694 |
| LargeArteryStroke | genus. Butyricicoccus. id. 2055                | Inverse variance weighted | 3 | -0.0140 | 0.0530 | 0.7915 | 0.1110  | 0.3204 | 0.7876 | 0.5916 | 0.4418 | 172.9694 |
| LargeArteryStroke | genus. Butyricicoccus. id. 2055                | Simple mode               | 3 | 0.0012  | 0.0730 | 0.9879 | 0.1110  | 0.3204 | 0.7876 | 0.5916 | 0.4418 | 172.9694 |
| LargeArteryStroke | genus. Butyricicoccus. id. 2055                | Weighted mode             | 3 | 0.0020  | 0.0697 | 0.9802 | 0.1110  | 0.3204 | 0.7876 | 0.5916 | 0.4418 | 172.9694 |
| LargeArteryStroke | genus. Butyricimonas. id. 945                  | MR Egger                  | 3 | 2.0755  | 1.8205 | 0.4584 | -0.4602 | 0.4042 | 0.4588 | 1.5771 | 0.4545 | 102.9065 |
| LargeArteryStroke | genus. Butyricimonas. id. 945                  | Weighted median           | 3 | 0.0541  | 0.0868 | 0.5328 | -0.4602 | 0.4042 | 0.4588 | 1.5771 | 0.4545 | 102.9065 |
| LargeArteryStroke | genus. Butyricimonas. id. 945                  | Inverse variance weighted | 3 | 0.0042  | 0.0668 | 0.9503 | -0.4602 | 0.4042 | 0.4588 | 1.5771 | 0.4545 | 102.9065 |
| LargeArteryStroke | genus. Butyricimonas. id. 945                  | Simple mode               | 3 | 0.0688  | 0.1089 | 0.5922 | -0.4602 | 0.4042 | 0.4588 | 1.5771 | 0.4545 | 102.9065 |
| LargeArteryStroke | genus. Butyricimonas. id. 945                  | Weighted mode             | 3 | 0.0693  | 0.1024 | 0.5683 | -0.4602 | 0.4042 | 0.4588 | 1.5771 | 0.4545 | 102.9065 |
| LargeArteryStroke | genus. Butyrivibrio. id. 1993                  | Inverse variance weighted | 2 | -0.1764 | 0.2636 | 0.5033 | NA      | NA     | NA     | 3.7561 | 0.0526 | 13.3248  |
| LargeArteryStroke | genus. CandidatusSoleaferrea. id. 11350        | MR Egger                  | 3 | 0.0948  | 2.3658 | 0.9745 | -0.0106 | 0.5253 | 0.9871 | 0.3843 | 0.5353 | 117.1434 |
| LargeArteryStroke | genus. CandidatusSoleaferrea. id. 11350        | Weighted median           | 3 | 0.0236  | 0.1057 | 0.8231 | -0.0106 | 0.5253 | 0.9871 | 0.3843 | 0.5353 | 117.1434 |
| LargeArteryStroke | genus. CandidatusSoleaferrea. id. 11350        | Inverse variance weighted | 3 | 0.0469  | 0.0876 | 0.5925 | -0.0106 | 0.5253 | 0.9871 | 0.3843 | 0.5353 | 117.1434 |
| LargeArteryStroke | genus. CandidatusSoleaferrea. id. 11350        | Simple mode               | 3 | 0.0083  | 0.1136 | 0.9487 | -0.0106 | 0.5253 | 0.9871 | 0.3843 | 0.5353 | 117.1434 |
| LargeArteryStroke | genus. CandidatusSoleaferrea. id. 11350        | Weighted mode             | 3 | 0.0099  | 0.1211 | 0.9425 | -0.0106 | 0.5253 | 0.9871 | 0.3843 | 0.5353 | 117.1434 |
| LargeArteryStroke | genus. ChristensenellaceaeR. 7group. id. 11283 | MR Egger                  | 3 | 2.2653  | 1.4788 | 0.3682 | -0.4839 | 0.3281 | 0.3793 | 2.8641 | 0.2388 | 56.5648  |
| LargeArteryStroke | genus. ChristensenellaceaeR. 7group. id. 11283 | Weighted median           | 3 | 0.1190  | 0.0687 | 0.0832 | -0.4839 | 0.3281 | 0.3793 | 2.8641 | 0.2388 | 56.5648  |
| LargeArteryStroke | genus. ChristensenellaceaeR. 7group. id. 11283 | Inverse variance weighted | 3 | 0.0860  | 0.0648 | 0.1848 | -0.4839 | 0.3281 | 0.3793 | 2.8641 | 0.2388 | 56.5648  |
| LargeArteryStroke | genus. ChristensenellaceaeR. 7group. id. 11283 | Simple mode               | 3 | 0.1560  | 0.1035 | 0.2709 | -0.4839 | 0.3281 | 0.3793 | 2.8641 | 0.2388 | 56.5648  |
| LargeArteryStroke | genus. ChristensenellaceaeR. 7group. id. 11283 | Weighted mode             | 3 | 0.1576  | 0.1062 | 0.2760 | -0.4839 | 0.3281 | 0.3793 | 2.8641 | 0.2388 | 56.5648  |
| LargeArteryStroke | genus. Clostridiumsensustrictol. id. 1873      | MR Egger                  | 3 | 1.4087  | 1.5947 | 0.5394 | -0.3017 | 0.3538 | 0.5505 | 0.7282 | 0.6948 | 107.6266 |
| LargeArteryStroke | genus. Clostridiumsensustrictol. id. 1873      | Weighted median           | 3 | 0.0512  | 0.0676 | 0.4487 | -0.3017 | 0.3538 | 0.5505 | 0.7282 | 0.6948 | 107.6266 |
| LargeArteryStroke | genus. Clostridiumsensustrictol. id. 1873      | Inverse variance weighted | 3 | 0.0498  | 0.0587 | 0.3957 | -0.3017 | 0.3538 | 0.5505 | 0.7282 | 0.6948 | 107.6266 |
| LargeArteryStroke | genus. Clostridiumsensustrictol. id. 1873      | Simple mode               | 3 | 0.0756  | 0.0888 | 0.4842 | -0.3017 | 0.3538 | 0.5505 | 0.7282 | 0.6948 | 107.6266 |
| LargeArteryStroke | genus. Clostridiumsensustrictol. id. 1873      | Weighted mode             | 3 | 0.0573  | 0.0832 | 0.5620 | -0.3017 | 0.3538 | 0.5505 | 0.7282 | 0.6948 | 107.6266 |
| LargeArteryStroke | genus. Collinsella. id. 815                    | MR Egger                  | 3 | -1.2156 | 1.5694 | 0.5804 | 0.2633  | 0.3484 | 0.5880 | 0.5830 | 0.7472 | 155.0828 |
| LargeArteryStroke | genus. Collinsella. id. 815                    | Weighted median           | 3 | -0.0406 | 0.0700 | 0.5620 | 0.2633  | 0.3484 | 0.5880 | 0.5830 | 0.7472 | 155.0828 |
| LargeArteryStroke | genus. Collinsella. id. 815                    | Inverse variance weighted | 3 | -0.0301 | 0.0572 | 0.5981 | 0.2633  | 0.3484 | 0.5880 | 0.5830 | 0.7472 | 155.0828 |
| LargeArteryStroke | genus. Collinsella. id. 815                    | Simple mode               | 3 | -0.0637 | 0.0825 | 0.5210 | 0.2633  | 0.3484 | 0.5880 | 0.5830 | 0.7472 | 155.0828 |
| LargeArteryStroke | genus. Collinsella. id. 815                    | Weighted mode             | 3 | -0.0616 | 0.0824 | 0.5329 | 0.2633  | 0.3484 | 0.5880 | 0.5830 | 0.7472 | 155.0828 |
| LargeArteryStroke | genus. Coprobacter. id. 949                    | MR Egger                  | 3 | 2.5693  | 2.2813 | 0.4622 | -0.5840 | 0.5060 | 0.4545 | 1.4884 | 0.4751 | 68.1024  |
| LargeArteryStroke | genus. Coprobacter. id. 949                    | Weighted median           | 3 | -0.0888 | 0.1065 | 0.4048 | -0.5840 | 0.5060 | 0.4545 | 1.4884 | 0.4751 | 68.1024  |
| LargeArteryStroke | genus. Coprobacter. id. 949                    | Inverse variance weighted | 3 | -0.0619 | 0.0841 | 0.4618 | -0.5840 | 0.5060 | 0.4545 | 1.4884 | 0.4751 | 68.1024  |
| LargeArteryStroke | genus. Coprobacter. id. 949                    | Simple mode               | 3 | -0.1082 | 0.1339 | 0.5037 | -0.5840 | 0.5060 | 0.4545 | 1.4884 | 0.4751 | 68.1024  |
| LargeArteryStroke | genus. Coprobacter. id. 949                    | Weighted mode             | 3 | -0.1144 | 0.1370 | 0.4915 | -0.5840 | 0.5060 | 0.4545 | 1.4884 | 0.4751 | 68.1024  |
| LargeArteryStroke | genus. Coprococcus1. id. 11301                 | MR Egger                  | 3 | 1.4339  | 1.4619 | 0.5062 | -0.2999 | 0.3244 | 0.5250 | 0.8566 | 0.6516 | 74.9633  |
| LargeArteryStroke | genus. Coprococcus1. id. 11301                 | Weighted median           | 3 | 0.0883  | 0.0650 | 0.1746 | -0.2999 | 0.3244 | 0.5250 | 0.8566 | 0.6516 | 74.9633  |
| LargeArteryStroke | genus. Coprococcus1. id. 11301                 | Inverse variance weighted | 3 | 0.0833  | 0.0536 | 0.1203 | -0.2999 | 0.3244 | 0.5250 | 0.8566 | 0.6516 | 74.9633  |
| LargeArteryStroke | genus. Coprococcus1. id. 11301                 | Simple mode               | 3 | 0.1149  | 0.0826 | 0.2987 | -0.2999 | 0.3244 | 0.5250 | 0.8566 | 0.6516 | 74.9633  |
| LargeArteryStroke | genus. Coprococcus1. id. 11301                 | Weighted mode             | 3 | 0.1060  | 0.0846 | 0.3371 | -0.2999 | 0.3244 | 0.5250 | 0.8566 | 0.6516 | 74.9633  |
| LargeArteryStroke | genus. Coprococcus2. id. 11302                 | MR Egger                  | 3 | -2.7933 | 1.7688 | 0.3594 | 0.6353  | 0.3924 | 0.3522 | 2.8812 | 0.2368 | 66.6146  |
| LargeArteryStroke | genus. Coprococcus2. id. 11302                 | Weighted median           | 3 | 0.0136  | 0.0860 | 0.8748 | 0.6353  | 0.3924 | 0.3522 | 2.8812 | 0.2368 | 66.6146  |
| LargeArteryStroke | genus. Coprococcus2. id. 11302                 | Inverse variance weighted | 3 | 0.0689  | 0.0781 | 0.3775 | 0.6353  | 0.3924 | 0.3522 | 2.8812 | 0.2368 | 66.6146  |
| LargeArteryStroke | genus. Coprococcus2. id. 11302                 | Simple mode               | 3 | -0.0198 | 0.1133 | 0.8775 | 0.6353  | 0.3924 | 0.3522 | 2.8812 | 0.2368 | 66.6146  |
| LargeArteryStroke | genus. Coprococcus2. id. 11302                 | Weighted mode             | 3 | -0.0184 | 0.1172 | 0.8898 | 0.6353  | 0.3924 | 0.3522 | 2.8812 | 0.2368 | 66.6146  |
| LargeArteryStroke | genus. Coprococcus3. id. 11303                 | MR Egger                  | 3 | -0.7329 | 1.5050 | 0.7115 | 0.1705  | 0.3339 | 0.6994 | 0.4393 | 0.5075 | 165.3624 |
| LargeArteryStroke | genus. Coprococcus3. id. 11303                 | Weighted median           | 3 | 0.0400  | 0.0657 | 0.5425 | 0.1705  | 0.3339 | 0.6994 | 0.4393 | 0.5075 | 165.3624 |
| LargeArteryStroke | genus. Coprococcus3. id. 11303                 | Inverse variance weighted | 3 | 0.0352  | 0.0552 | 0.5239 | 0.1705  | 0.3339 | 0.6994 | 0.4393 | 0.5075 | 165.3624 |
| LargeArteryStroke | genus. Coprococcus3. id. 11303                 | Simple mode               | 3 | 0.0476  | 0.0807 | 0.6148 | 0.1705  | 0.3339 | 0.6994 | 0.4393 | 0.5075 | 165.3624 |
| LargeArteryStroke | genus. Coprococcus3. id. 11303                 | Weighted mode             | 3 | 0.0571  | 0.0772 | 0.5368 | 0.1705  | 0.3339 | 0.6994 | 0.4393 | 0.5075 | 165.3624 |
| LargeArteryStroke | genus. DefluviitaleaceaeUCG011. id. 11287      | MR Egger                  | 3 | -0.7769 | 2.0488 | 0.7692 | 0.1677  | 0.4548 | 0.7751 | 0.8881 | 0.3460 | 94.8131  |
| LargeArteryStroke | genus. DefluviitaleaceaeUCG011. id. 11287      | Weighted median           | 3 | -0.0159 | 0.0921 | 0.8632 | 0.1677  | 0.4548 | 0.7751 | 0.8881 | 0.3460 | 94.8131  |
| LargeArteryStroke | genus. DefluviitaleaceaeUCG011. id. 11287      | Inverse variance weighted | 3 | -0.0219 | 0.0757 | 0.7723 | 0.1677  | 0.4548 | 0.7751 | 0.8881 | 0.3460 | 94.8131  |
| LargeArteryStroke | genus. DefluviitaleaceaeUCG011. id. 11287      | Simple mode               | 3 | -0.0085 | 0.1060 | 0.9432 | 0.1677  | 0.4548 | 0.7751 | 0.8881 | 0.3460 | 94.8131  |
| LargeArteryStroke | genus. DefluviitaleaceaeUCG011. id. 11287      | Weighted mode             | 3 | -0.0061 | 0.1052 | 0.9590 | 0.1677  | 0.4548 | 0.7751 | 0.8881 | 0.3460 | 94.8131  |
| LargeArteryStroke | genus. Desulfovibrio. id. 3173                 | MR Egger                  | 3 | 0.8775  | 1.9567 | 0.7316 | -0.1800 | 0.4342 | 0.7498 | 0.6311 | 0.4269 | 77.2441  |
| LargeArteryStroke | genus. Desulfovibrio. id. 3173                 | Weighted median           | 3 | 0.0516  | 0.0873 | 0.5549 | -0.1800 | 0.4342 | 0.7498 | 0.6311 | 0.4269 | 77.2441  |
| LargeArteryStroke | genus. Desulfovibrio. id. 3173                 | Inverse variance weighted | 3 | 0.0667  | 0.0717 | 0.3522 | -0.1800 | 0.4342 | 0.7498 | 0.6311 | 0.4269 | 77.2441  |

|                   |                                             |                           |   |         |        |        |         |        |        |        |        |          |
|-------------------|---------------------------------------------|---------------------------|---|---------|--------|--------|---------|--------|--------|--------|--------|----------|
| LargeArteryStroke | genus. Desulfovibrio. id. 3173              | Simple mode               | 3 | 0.0402  | 0.0995 | 0.7251 | -0.1800 | 0.4342 | 0.7498 | 0.6311 | 0.4269 | 77.2441  |
| LargeArteryStroke | genus. Desulfovibrio. id. 3173              | Weighted mode             | 3 | 0.0382  | 0.1011 | 0.7420 | -0.1800 | 0.4342 | 0.7498 | 0.6311 | 0.4269 | 77.2441  |
| LargeArteryStroke | genus. Dialister. id. 2183                  | MR Egger                  | 3 | 1.5322  | 1.7385 | 0.5401 | -0.3468 | 0.3857 | 0.5337 | 0.8969 | 0.6386 | 144.6309 |
| LargeArteryStroke | genus. Dialister. id. 2183                  | Weighted median           | 3 | -0.0034 | 0.0755 | 0.9640 | -0.3468 | 0.3857 | 0.5337 | 0.8969 | 0.6386 | 144.6309 |
| LargeArteryStroke | genus. Dialister. id. 2183                  | Inverse variance weighted | 3 | -0.0302 | 0.0636 | 0.6346 | -0.3468 | 0.3857 | 0.5337 | 0.8969 | 0.6386 | 144.6309 |
| LargeArteryStroke | genus. Dialister. id. 2183                  | Simple mode               | 3 | 0.0178  | 0.0895 | 0.8604 | -0.3468 | 0.3857 | 0.5337 | 0.8969 | 0.6386 | 144.6309 |
| LargeArteryStroke | genus. Dialister. id. 2183                  | Weighted mode             | 3 | 0.0171  | 0.0938 | 0.8720 | -0.3468 | 0.3857 | 0.5337 | 0.8969 | 0.6386 | 144.6309 |
| LargeArteryStroke | genus. Dorea. id. 1997                      | MR Egger                  | 3 | -0.7876 | 1.4318 | 0.6798 | 0.1885  | 0.3177 | 0.6590 | 0.5529 | 0.4571 | 111.6134 |
| LargeArteryStroke | genus. Dorea. id. 1997                      | Weighted median           | 3 | 0.0820  | 0.0615 | 0.1821 | 0.1885  | 0.3177 | 0.6590 | 0.5529 | 0.4571 | 111.6134 |
| LargeArteryStroke | genus. Dorea. id. 1997                      | Inverse variance weighted | 3 | 0.0616  | 0.0524 | 0.2393 | 0.1885  | 0.3177 | 0.6590 | 0.5529 | 0.4571 | 111.6134 |
| LargeArteryStroke | genus. Dorea. id. 1997                      | Simple mode               | 3 | 0.0926  | 0.0793 | 0.3630 | 0.1885  | 0.3177 | 0.6590 | 0.5529 | 0.4571 | 111.6134 |
| LargeArteryStroke | genus. Dorea. id. 1997                      | Weighted mode             | 3 | 0.0910  | 0.0714 | 0.3307 | 0.1885  | 0.3177 | 0.6590 | 0.5529 | 0.4571 | 111.6134 |
| LargeArteryStroke | genus. Eggerthella. id. 819                 | MR Egger                  | 3 | -4.9073 | 3.1861 | 0.3666 | 1.0766  | 0.7077 | 0.3702 | 4.9630 | 0.0836 | 27.8777  |
| LargeArteryStroke | genus. Eggerthella. id. 819                 | Weighted median           | 3 | -0.1369 | 0.1320 | 0.2997 | 1.0766  | 0.7077 | 0.3702 | 4.9630 | 0.0836 | 27.8777  |
| LargeArteryStroke | genus. Eggerthella. id. 819                 | Inverse variance weighted | 3 | -0.0635 | 0.1509 | 0.6738 | 1.0766  | 0.7077 | 0.3702 | 4.9630 | 0.0836 | 27.8777  |
| LargeArteryStroke | genus. Eggerthella. id. 819                 | Simple mode               | 3 | -0.2194 | 0.1897 | 0.3669 | 1.0766  | 0.7077 | 0.3702 | 4.9630 | 0.0836 | 27.8777  |
| LargeArteryStroke | genus. Eggerthella. id. 819                 | Weighted mode             | 3 | -0.2217 | 0.1947 | 0.3728 | 1.0766  | 0.7077 | 0.3702 | 4.9630 | 0.0836 | 27.8777  |
| LargeArteryStroke | genus. Eisenbergiella. id. 11304            | MR Egger                  | 3 | 0.9595  | 2.4892 | 0.7658 | -0.2505 | 0.5525 | 0.7290 | 0.3386 | 0.5607 | 38.3226  |
| LargeArteryStroke | genus. Eisenbergiella. id. 11304            | Weighted median           | 3 | -0.1728 | 0.1086 | 0.1117 | -0.2505 | 0.5525 | 0.7290 | 0.3386 | 0.5607 | 38.3226  |
| LargeArteryStroke | genus. Eisenbergiella. id. 11304            | Inverse variance weighted | 3 | -0.1685 | 0.0909 | 0.0638 | -0.2505 | 0.5525 | 0.7290 | 0.3386 | 0.5607 | 38.3226  |
| LargeArteryStroke | genus. Eisenbergiella. id. 11304            | Simple mode               | 3 | -0.1851 | 0.1295 | 0.2892 | -0.2505 | 0.5525 | 0.7290 | 0.3386 | 0.5607 | 38.3226  |
| LargeArteryStroke | genus. Eisenbergiella. id. 11304            | Weighted mode             | 3 | -0.1968 | 0.1255 | 0.2575 | -0.2505 | 0.5525 | 0.7290 | 0.3386 | 0.5607 | 38.3226  |
| LargeArteryStroke | genus. Enterorhabdus. id. 820               | MR Egger                  | 3 | 0.2502  | 2.1299 | 0.9255 | -0.0615 | 0.4731 | 0.9177 | 0.6813 | 0.4091 | 119.8320 |
| LargeArteryStroke | genus. Enterorhabdus. id. 820               | Weighted median           | 3 | -0.0594 | 0.0913 | 0.5151 | -0.0615 | 0.4731 | 0.9177 | 0.6813 | 0.4091 | 119.8320 |
| LargeArteryStroke | genus. Enterorhabdus. id. 820               | Inverse variance weighted | 3 | -0.0266 | 0.0781 | 0.7332 | -0.0615 | 0.4731 | 0.9177 | 0.6813 | 0.4091 | 119.8320 |
| LargeArteryStroke | genus. Enterorhabdus. id. 820               | Simple mode               | 3 | -0.0743 | 0.1056 | 0.5545 | -0.0615 | 0.4731 | 0.9177 | 0.6813 | 0.4091 | 119.8320 |
| LargeArteryStroke | genus. Enterorhabdus. id. 820               | Weighted mode             | 3 | -0.0735 | 0.1101 | 0.5730 | -0.0615 | 0.4731 | 0.9177 | 0.6813 | 0.4091 | 119.8320 |
| LargeArteryStroke | genus. Erysipelatoclostridium. id. 11381    | MR Egger                  | 3 | -0.1501 | 5.7711 | 0.9834 | 0.0380  | 1.2810 | 0.9811 | 9.3202 | 0.0023 | 28.0715  |
| LargeArteryStroke | genus. Erysipelatoclostridium. id. 11381    | Weighted median           | 3 | 0.1077  | 0.1002 | 0.2826 | 0.0380  | 1.2810 | 0.9811 | 9.3202 | 0.0023 | 28.0715  |
| LargeArteryStroke | genus. Erysipelatoclostridium. id. 11381    | Inverse variance weighted | 3 | 0.0212  | 0.1498 | 0.8876 | 0.0380  | 1.2810 | 0.9811 | 9.3202 | 0.0023 | 28.0715  |
| LargeArteryStroke | genus. Erysipelatoclostridium. id. 11381    | Simple mode               | 3 | 0.1780  | 0.1199 | 0.2760 | 0.0380  | 1.2810 | 0.9811 | 9.3202 | 0.0023 | 28.0715  |
| LargeArteryStroke | genus. Erysipelatoclostridium. id. 11381    | Weighted mode             | 3 | 0.1669  | 0.1137 | 0.2799 | 0.0380  | 1.2810 | 0.9811 | 9.3202 | 0.0023 | 28.0715  |
| LargeArteryStroke | genus. ErysipelotrichaceaeUCG003. id. 11384 | MR Egger                  | 3 | -0.5112 | 1.5500 | 0.7972 | 0.1011  | 0.3439 | 0.8179 | 0.4238 | 0.5151 | 122.9641 |
| LargeArteryStroke | genus. ErysipelotrichaceaeUCG003. id. 11384 | Weighted median           | 3 | -0.0371 | 0.0674 | 0.5821 | 0.1011  | 0.3439 | 0.8179 | 0.4238 | 0.5151 | 122.9641 |
| LargeArteryStroke | genus. ErysipelotrichaceaeUCG003. id. 11384 | Inverse variance weighted | 3 | -0.0557 | 0.0570 | 0.3283 | 0.1011  | 0.3439 | 0.8179 | 0.4238 | 0.5151 | 122.9641 |
| LargeArteryStroke | genus. ErysipelotrichaceaeUCG003. id. 11384 | Simple mode               | 3 | -0.0291 | 0.0823 | 0.7570 | 0.1011  | 0.3439 | 0.8179 | 0.4238 | 0.5151 | 122.9641 |
| LargeArteryStroke | genus. ErysipelotrichaceaeUCG003. id. 11384 | Weighted mode             | 3 | -0.0270 | 0.0843 | 0.7795 | 0.1011  | 0.3439 | 0.8179 | 0.4238 | 0.5151 | 122.9641 |
| LargeArteryStroke | genus. Escherichia. Shigella. id. 3504      | MR Egger                  | 3 | 2.2034  | 1.7316 | 0.4240 | -0.4858 | 0.3843 | 0.4261 | 2.3614 | 0.3071 | 71.3181  |
| LargeArteryStroke | genus. Escherichia. Shigella. id. 3504      | Weighted median           | 3 | -0.0379 | 0.0825 | 0.6455 | -0.4858 | 0.3843 | 0.4261 | 2.3614 | 0.3071 | 71.3181  |
| LargeArteryStroke | genus. Escherichia. Shigella. id. 3504      | Inverse variance weighted | 3 | 0.0163  | 0.0691 | 0.8130 | -0.4858 | 0.3843 | 0.4261 | 2.3614 | 0.3071 | 71.3181  |
| LargeArteryStroke | genus. Escherichia. Shigella. id. 3504      | Simple mode               | 3 | -0.0440 | 0.1020 | 0.7083 | -0.4858 | 0.3843 | 0.4261 | 2.3614 | 0.3071 | 71.3181  |
| LargeArteryStroke | genus. Escherichia. Shigella. id. 3504      | Weighted mode             | 3 | -0.0447 | 0.0937 | 0.6807 | -0.4858 | 0.3843 | 0.4261 | 2.3614 | 0.3071 | 71.3181  |
| LargeArteryStroke | genus. Faecalibacterium. id. 2057           | MR Egger                  | 3 | -0.4738 | 1.4150 | 0.7943 | 0.1112  | 0.3139 | 0.7833 | 0.7460 | 0.3878 | 165.7099 |
| LargeArteryStroke | genus. Faecalibacterium. id. 2057           | Weighted median           | 3 | 0.0516  | 0.0623 | 0.4080 | 0.1112  | 0.3139 | 0.7833 | 0.7460 | 0.3878 | 165.7099 |
| LargeArteryStroke | genus. Faecalibacterium. id. 2057           | Inverse variance weighted | 3 | 0.0270  | 0.0517 | 0.6017 | 0.1112  | 0.3139 | 0.7833 | 0.7460 | 0.3878 | 165.7099 |
| LargeArteryStroke | genus. Faecalibacterium. id. 2057           | Simple mode               | 3 | 0.0600  | 0.0718 | 0.4914 | 0.1112  | 0.3139 | 0.7833 | 0.7460 | 0.3878 | 165.7099 |
| LargeArteryStroke | genus. Faecalibacterium. id. 2057           | Weighted mode             | 3 | 0.0622  | 0.0737 | 0.4875 | 0.1112  | 0.3139 | 0.7833 | 0.7460 | 0.3878 | 165.7099 |
| LargeArteryStroke | genus. FamilyXIIIB3011group. id. 11293      | MR Egger                  | 3 | 3.0069  | 1.5760 | 0.3073 | -0.6658 | 0.3497 | 0.3079 | 3.8029 | 0.1494 | 68.8176  |
| LargeArteryStroke | genus. FamilyXIIIB3011group. id. 11293      | Weighted median           | 3 | 0.0477  | 0.0753 | 0.5263 | -0.6658 | 0.3497 | 0.3079 | 3.8029 | 0.1494 | 68.8176  |
| LargeArteryStroke | genus. FamilyXIIIB3011group. id. 11293      | Inverse variance weighted | 3 | 0.0084  | 0.0803 | 0.9171 | -0.6658 | 0.3497 | 0.3079 | 3.8029 | 0.1494 | 68.8176  |
| LargeArteryStroke | genus. FamilyXIIIB3011group. id. 11293      | Simple mode               | 3 | 0.0995  | 0.1100 | 0.4611 | -0.6658 | 0.3497 | 0.3079 | 3.8029 | 0.1494 | 68.8176  |
| LargeArteryStroke | genus. FamilyXIIIB3011group. id. 11293      | Weighted mode             | 3 | 0.0964  | 0.1192 | 0.5038 | -0.6658 | 0.3497 | 0.3079 | 3.8029 | 0.1494 | 68.8176  |
| LargeArteryStroke | genus. FamilyXIIIB3011group. id. 11294      | MR Egger                  | 3 | -3.0040 | 1.6515 | 0.3200 | 0.6616  | 0.3666 | 0.3221 | 3.3205 | 0.1901 | 65.6619  |
| LargeArteryStroke | genus. FamilyXIIIB3011group. id. 11294      | Weighted median           | 3 | -0.0530 | 0.0801 | 0.5082 | 0.6616  | 0.3666 | 0.3221 | 3.3205 | 0.1901 | 65.6619  |
| LargeArteryStroke | genus. FamilyXIIIB3011group. id. 11294      | Inverse variance weighted | 3 | -0.0256 | 0.0789 | 0.7459 | 0.6616  | 0.3666 | 0.3221 | 3.3205 | 0.1901 | 65.6619  |
| LargeArteryStroke | genus. FamilyXIIIB3011group. id. 11294      | Simple mode               | 3 | -0.1109 | 0.1065 | 0.4072 | 0.6616  | 0.3666 | 0.3221 | 3.3205 | 0.1901 | 65.6619  |
| LargeArteryStroke | genus. FamilyXIIIB3011group. id. 11294      | Weighted mode             | 3 | -0.1082 | 0.1141 | 0.4430 | 0.6616  | 0.3666 | 0.3221 | 3.3205 | 0.1901 | 65.6619  |
| LargeArteryStroke | genus. Flavonifractor. id. 2059             | MR Egger                  | 3 | -0.8810 | 2.1739 | 0.7549 | 0.1855  | 0.4823 | 0.7663 | 1.4028 | 0.2363 | 72.7672  |

|                   |                                  |                           |   |         |        |        |         |        |        |        |        |          |
|-------------------|----------------------------------|---------------------------|---|---------|--------|--------|---------|--------|--------|--------|--------|----------|
| LargeArteryStroke | genus.Flavonifractor.id.2059     | Weighted median           | 3 | -0.0352 | 0.0836 | 0.6733 | 0.1855  | 0.4823 | 0.7663 | 1.4028 | 0.2363 | 72.7672  |
| LargeArteryStroke | genus.Flavonifractor.id.2059     | Inverse variance weighted | 3 | -0.0456 | 0.0672 | 0.4975 | 0.1855  | 0.4823 | 0.7663 | 1.4028 | 0.2363 | 72.7672  |
| LargeArteryStroke | genus.Flavonifractor.id.2059     | Simple mode               | 3 | -0.0280 | 0.1110 | 0.8246 | 0.1855  | 0.4823 | 0.7663 | 1.4028 | 0.2363 | 72.7672  |
| LargeArteryStroke | genus.Flavonifractor.id.2059     | Weighted mode             | 3 | -0.0212 | 0.1018 | 0.8544 | 0.1855  | 0.4823 | 0.7663 | 1.4028 | 0.2363 | 72.7672  |
| LargeArteryStroke | genus.Fusicatenibacter.id.11305  | MR Egger                  | 3 | -2.9748 | 2.6927 | 0.4683 | 0.6697  | 0.5974 | 0.4637 | 7.9000 | 0.0193 | 43.4969  |
| LargeArteryStroke | genus.Fusicatenibacter.id.11305  | Weighted median           | 3 | 0.1280  | 0.0695 | 0.0655 | 0.6697  | 0.5974 | 0.4637 | 7.9000 | 0.0193 | 43.4969  |
| LargeArteryStroke | genus.Fusicatenibacter.id.11305  | Inverse variance weighted | 3 | 0.0418  | 0.1047 | 0.6900 | 0.6697  | 0.5974 | 0.4637 | 7.9000 | 0.0193 | 43.4969  |
| LargeArteryStroke | genus.Fusicatenibacter.id.11305  | Simple mode               | 3 | 0.1332  | 0.0851 | 0.2580 | 0.6697  | 0.5974 | 0.4637 | 7.9000 | 0.0193 | 43.4969  |
| LargeArteryStroke | genus.Fusicatenibacter.id.11305  | Weighted mode             | 3 | 0.1323  | 0.0744 | 0.2173 | 0.6697  | 0.5974 | 0.4637 | 7.9000 | 0.0193 | 43.4969  |
| LargeArteryStroke | genus.Gordonibacter.id.821       | MR Egger                  | 3 | 0.3683  | 3.3200 | 0.9297 | -0.0706 | 0.7376 | 0.9393 | 1.1995 | 0.2734 | 52.5171  |
| LargeArteryStroke | genus.Gordonibacter.id.821       | Weighted median           | 3 | 0.0809  | 0.1415 | 0.5673 | -0.0706 | 0.7376 | 0.9393 | 1.1995 | 0.2734 | 52.5171  |
| LargeArteryStroke | genus.Gordonibacter.id.821       | Inverse variance weighted | 3 | 0.0508  | 0.1115 | 0.6488 | -0.0706 | 0.7376 | 0.9393 | 1.1995 | 0.2734 | 52.5171  |
| LargeArteryStroke | genus.Gordonibacter.id.821       | Simple mode               | 3 | 0.1340  | 0.1611 | 0.4931 | -0.0706 | 0.7376 | 0.9393 | 1.1995 | 0.2734 | 52.5171  |
| LargeArteryStroke | genus.Gordonibacter.id.821       | Weighted mode             | 3 | 0.1256  | 0.1640 | 0.5239 | -0.0706 | 0.7376 | 0.9393 | 1.1995 | 0.2734 | 52.5171  |
| LargeArteryStroke | genus.Haemophilus.id.3698        | MR Egger                  | 3 | -1.5725 | 2.0078 | 0.5770 | 0.3663  | 0.4453 | 0.5618 | 0.6872 | 0.7092 | 92.5573  |
| LargeArteryStroke | genus.Haemophilus.id.3698        | Weighted median           | 3 | 0.0630  | 0.0909 | 0.4878 | 0.3663  | 0.4453 | 0.5618 | 0.6872 | 0.7092 | 92.5573  |
| LargeArteryStroke | genus.Haemophilus.id.3698        | Inverse variance weighted | 3 | 0.0780  | 0.0733 | 0.2872 | 0.3663  | 0.4453 | 0.5618 | 0.6872 | 0.7092 | 92.5573  |
| LargeArteryStroke | genus.Haemophilus.id.3698        | Simple mode               | 3 | 0.0306  | 0.1087 | 0.8045 | 0.3663  | 0.4453 | 0.5618 | 0.6872 | 0.7092 | 92.5573  |
| LargeArteryStroke | genus.Haemophilus.id.3698        | Weighted mode             | 3 | 0.0337  | 0.1071 | 0.7828 | 0.3663  | 0.4453 | 0.5618 | 0.6872 | 0.7092 | 92.5573  |
| LargeArteryStroke | genus.Holdemanella.id.11393      | MR Egger                  | 3 | 1.3674  | 2.1668 | 0.6416 | -0.2755 | 0.4808 | 0.6687 | 0.1009 | 0.7507 | 50.8814  |
| LargeArteryStroke | genus.Holdemanella.id.11393      | Weighted median           | 3 | 0.1491  | 0.0940 | 0.1126 | -0.2755 | 0.4808 | 0.6687 | 0.1009 | 0.7507 | 50.8814  |
| LargeArteryStroke | genus.Holdemanella.id.11393      | Inverse variance weighted | 3 | 0.1264  | 0.0792 | 0.1107 | -0.2755 | 0.4808 | 0.6687 | 0.1009 | 0.7507 | 50.8814  |
| LargeArteryStroke | genus.Holdemanella.id.11393      | Simple mode               | 3 | 0.1660  | 0.1178 | 0.2942 | -0.2755 | 0.4808 | 0.6687 | 0.1009 | 0.7507 | 50.8814  |
| LargeArteryStroke | genus.Holdemanella.id.11393      | Weighted mode             | 3 | 0.1669  | 0.1186 | 0.2948 | -0.2755 | 0.4808 | 0.6687 | 0.1009 | 0.7507 | 50.8814  |
| LargeArteryStroke | genus.Holdemania.id.2157         | MR Egger                  | 3 | 1.9026  | 5.1427 | 0.7744 | -0.4268 | 1.1412 | 0.7721 | 6.7976 | 0.0091 | 28.8462  |
| LargeArteryStroke | genus.Holdemania.id.2157         | Weighted median           | 3 | -0.0339 | 0.1079 | 0.7533 | -0.4268 | 1.1412 | 0.7721 | 6.7976 | 0.0091 | 28.8462  |
| LargeArteryStroke | genus.Holdemania.id.2157         | Inverse variance weighted | 3 | -0.0195 | 0.1421 | 0.8907 | -0.4268 | 1.1412 | 0.7721 | 6.7976 | 0.0091 | 28.8462  |
| LargeArteryStroke | genus.Holdemania.id.2157         | Simple mode               | 3 | -0.0536 | 0.1536 | 0.7604 | -0.4268 | 1.1412 | 0.7721 | 6.7976 | 0.0091 | 28.8462  |
| LargeArteryStroke | genus.Holdemania.id.2157         | Weighted mode             | 3 | -0.0568 | 0.1433 | 0.7301 | -0.4268 | 1.1412 | 0.7721 | 6.7976 | 0.0091 | 28.8462  |
| LargeArteryStroke | genus.Howardella.id.2000         | MR Egger                  | 3 | -1.8889 | 3.0975 | 0.6514 | 0.3945  | 0.6869 | 0.6681 | 0.0509 | 0.8215 | 51.9578  |
| LargeArteryStroke | genus.Howardella.id.2000         | Weighted median           | 3 | -0.1545 | 0.1382 | 0.2635 | 0.3945  | 0.6869 | 0.6681 | 0.0509 | 0.8215 | 51.9578  |
| LargeArteryStroke | genus.Howardella.id.2000         | Inverse variance weighted | 3 | -0.1113 | 0.1134 | 0.3264 | 0.3945  | 0.6869 | 0.6681 | 0.0509 | 0.8215 | 51.9578  |
| LargeArteryStroke | genus.Howardella.id.2000         | Simple mode               | 3 | -0.1671 | 0.1519 | 0.3860 | 0.3945  | 0.6869 | 0.6681 | 0.0509 | 0.8215 | 51.9578  |
| LargeArteryStroke | genus.Howardella.id.2000         | Weighted mode             | 3 | -0.1671 | 0.1517 | 0.3857 | 0.3945  | 0.6869 | 0.6681 | 0.0509 | 0.8215 | 51.9578  |
| LargeArteryStroke | genus.Hungatella.id.11306        | MR Egger                  | 3 | 3.5165  | 2.9123 | 0.4404 | -0.7962 | 0.6456 | 0.4337 | 2.1351 | 0.3438 | 39.3181  |
| LargeArteryStroke | genus.Hungatella.id.11306        | Weighted median           | 3 | -0.1551 | 0.1303 | 0.2337 | -0.7962 | 0.6456 | 0.4337 | 2.1351 | 0.3438 | 39.3181  |
| LargeArteryStroke | genus.Hungatella.id.11306        | Inverse variance weighted | 3 | -0.0730 | 0.1116 | 0.5133 | -0.7962 | 0.6456 | 0.4337 | 2.1351 | 0.3438 | 39.3181  |
| LargeArteryStroke | genus.Hungatella.id.11306        | Simple mode               | 3 | -0.1679 | 0.1604 | 0.4049 | -0.7962 | 0.6456 | 0.4337 | 2.1351 | 0.3438 | 39.3181  |
| LargeArteryStroke | genus.Hungatella.id.11306        | Weighted mode             | 3 | -0.1704 | 0.1628 | 0.4050 | -0.7962 | 0.6456 | 0.4337 | 2.1351 | 0.3438 | 39.3181  |
| LargeArteryStroke | genus.Intestinibacter.id.11345   | MR Egger                  | 3 | -2.2213 | 1.6884 | 0.4138 | 0.5121  | 0.3746 | 0.4021 | 1.8866 | 0.3893 | 72.8162  |
| LargeArteryStroke | genus.Intestinibacter.id.11345   | Weighted median           | 3 | 0.0615  | 0.0797 | 0.4398 | 0.5121  | 0.3746 | 0.4021 | 1.8866 | 0.3893 | 72.8162  |
| LargeArteryStroke | genus.Intestinibacter.id.11345   | Inverse variance weighted | 3 | 0.0851  | 0.0625 | 0.1734 | 0.5121  | 0.3746 | 0.4021 | 1.8866 | 0.3893 | 72.8162  |
| LargeArteryStroke | genus.Intestinibacter.id.11345   | Simple mode               | 3 | 0.0203  | 0.1024 | 0.8611 | 0.5121  | 0.3746 | 0.4021 | 1.8866 | 0.3893 | 72.8162  |
| LargeArteryStroke | genus.Intestinibacter.id.11345   | Weighted mode             | 3 | 0.0249  | 0.1040 | 0.8332 | 0.5121  | 0.3746 | 0.4021 | 1.8866 | 0.3893 | 72.8162  |
| LargeArteryStroke | genus.Intestinimonas.id.2062     | MR Egger                  | 3 | 1.1991  | 3.0743 | 0.7632 | -0.2619 | 0.6820 | 0.7666 | 3.1986 | 0.0737 | 62.2786  |
| LargeArteryStroke | genus.Intestinimonas.id.2062     | Weighted median           | 3 | -0.0457 | 0.0864 | 0.5967 | -0.2619 | 0.6820 | 0.7666 | 3.1986 | 0.0737 | 62.2786  |
| LargeArteryStroke | genus.Intestinimonas.id.2062     | Inverse variance weighted | 3 | 0.0195  | 0.0859 | 0.8208 | -0.2619 | 0.6820 | 0.7666 | 3.1986 | 0.0737 | 62.2786  |
| LargeArteryStroke | genus.Intestinimonas.id.2062     | Simple mode               | 3 | -0.0621 | 0.1080 | 0.6233 | -0.2619 | 0.6820 | 0.7666 | 3.1986 | 0.0737 | 62.2786  |
| LargeArteryStroke | genus.Intestinimonas.id.2062     | Weighted mode             | 3 | -0.0664 | 0.1074 | 0.5993 | -0.2619 | 0.6820 | 0.7666 | 3.1986 | 0.0737 | 62.2786  |
| LargeArteryStroke | genus.Lachnoclostridium.id.11308 | MR Egger                  | 3 | 0.6085  | 1.4223 | 0.7426 | -0.1385 | 0.3155 | 0.7367 | 0.6081 | 0.4355 | 175.8429 |
| LargeArteryStroke | genus.Lachnoclostridium.id.11308 | Weighted median           | 3 | -0.0271 | 0.0640 | 0.6720 | -0.1385 | 0.3155 | 0.7367 | 0.6081 | 0.4355 | 175.8429 |
| LargeArteryStroke | genus.Lachnoclostridium.id.11308 | Inverse variance weighted | 3 | -0.0152 | 0.0520 | 0.7692 | -0.1385 | 0.3155 | 0.7367 | 0.6081 | 0.4355 | 175.8429 |
| LargeArteryStroke | genus.Lachnoclostridium.id.11308 | Simple mode               | 3 | -0.0369 | 0.0820 | 0.6970 | -0.1385 | 0.3155 | 0.7367 | 0.6081 | 0.4355 | 175.8429 |
| LargeArteryStroke | genus.Lachnoclostridium.id.11308 | Weighted mode             | 3 | -0.0369 | 0.0752 | 0.6727 | -0.1385 | 0.3155 | 0.7367 | 0.6081 | 0.4355 | 175.8429 |
| LargeArteryStroke | genus.Lachnospira.id.2004        | MR Egger                  | 3 | -0.0675 | 1.8416 | 0.9767 | 0.0059  | 0.4085 | 0.9908 | 1.5413 | 0.2144 | 106.8136 |
| LargeArteryStroke | genus.Lachnospira.id.2004        | Weighted median           | 3 | -0.0171 | 0.0676 | 0.8006 | 0.0059  | 0.4085 | 0.9908 | 1.5413 | 0.2144 | 106.8136 |
| LargeArteryStroke | genus.Lachnospira.id.2004        | Inverse variance weighted | 3 | -0.0410 | 0.0542 | 0.4500 | 0.0059  | 0.4085 | 0.9908 | 1.5413 | 0.2144 | 106.8136 |
| LargeArteryStroke | genus.Lachnospira.id.2004        | Simple mode               | 3 | 0.0097  | 0.0833 | 0.9176 | 0.0059  | 0.4085 | 0.9908 | 1.5413 | 0.2144 | 106.8136 |

|                   |                                               |                           |   |         |        |        |         |        |        |        |        |          |
|-------------------|-----------------------------------------------|---------------------------|---|---------|--------|--------|---------|--------|--------|--------|--------|----------|
| LargeArteryStroke | genus. Lachnospira. id. 2004                  | Weighted mode             | 3 | 0.0059  | 0.0831 | 0.9502 | 0.0059  | 0.4085 | 0.9908 | 1.5413 | 0.2144 | 106.8136 |
| LargeArteryStroke | genus. LachnospiraceaeFC5020group. id. 11314  | MR Egger                  | 3 | -0.6179 | 1.5915 | 0.7642 | 0.1587  | 0.3533 | 0.7312 | 0.0613 | 0.8045 | 83.0815  |
| LargeArteryStroke | genus. LachnospiraceaeFC5020group. id. 11314  | Weighted median           | 3 | 0.1104  | 0.0693 | 0.1110 | 0.1587  | 0.3533 | 0.7312 | 0.0613 | 0.8045 | 83.0815  |
| LargeArteryStroke | genus. LachnospiraceaeFC5020group. id. 11314  | Inverse variance weighted | 3 | 0.0965  | 0.0588 | 0.1009 | 0.1587  | 0.3533 | 0.7312 | 0.0613 | 0.8045 | 83.0815  |
| LargeArteryStroke | genus. LachnospiraceaeFC5020group. id. 11314  | Simple mode               | 3 | 0.1151  | 0.0848 | 0.3074 | 0.1587  | 0.3533 | 0.7312 | 0.0613 | 0.8045 | 83.0815  |
| LargeArteryStroke | genus. LachnospiraceaeFC5020group. id. 11314  | Weighted mode             | 3 | 0.1157  | 0.0781 | 0.2765 | 0.1587  | 0.3533 | 0.7312 | 0.0613 | 0.8045 | 83.0815  |
| LargeArteryStroke | genus. LachnospiraceaeNC2004group. id. 11316  | MR Egger                  | 3 | -1.1102 | 2.4190 | 0.7261 | 0.2820  | 0.5365 | 0.6919 | 0.2792 | 0.8697 | 44.5869  |
| LargeArteryStroke | genus. LachnospiraceaeNC2004group. id. 11316  | Weighted median           | 3 | 0.1483  | 0.1074 | 0.1672 | 0.2820  | 0.5365 | 0.6919 | 0.2792 | 0.8697 | 44.5869  |
| LargeArteryStroke | genus. LachnospiraceaeNC2004group. id. 11316  | Inverse variance weighted | 3 | 0.1604  | 0.0910 | 0.0779 | 0.2820  | 0.5365 | 0.6919 | 0.2792 | 0.8697 | 44.5869  |
| LargeArteryStroke | genus. LachnospiraceaeNC2004group. id. 11316  | Simple mode               | 3 | 0.1243  | 0.1241 | 0.4221 | 0.2820  | 0.5365 | 0.6919 | 0.2792 | 0.8697 | 44.5869  |
| LargeArteryStroke | genus. LachnospiraceaeNC2004group. id. 11316  | Weighted mode             | 3 | 0.1243  | 0.1291 | 0.4374 | 0.2820  | 0.5365 | 0.6919 | 0.2792 | 0.8697 | 44.5869  |
| LargeArteryStroke | genus. LachnospiraceaeND3007group. id. 11317  | MR Egger                  | 3 | 0.1078  | 1.5312 | 0.9552 | -0.0038 | 0.3398 | 0.9929 | 0.9709 | 0.3245 | 75.4654  |
| LargeArteryStroke | genus. LachnospiraceaeND3007group. id. 11317  | Weighted median           | 3 | 0.0688  | 0.0690 | 0.3189 | -0.0038 | 0.3398 | 0.9929 | 0.9709 | 0.3245 | 75.4654  |
| LargeArteryStroke | genus. LachnospiraceaeND3007group. id. 11317  | Inverse variance weighted | 3 | 0.0907  | 0.0561 | 0.1062 | -0.0038 | 0.3398 | 0.9929 | 0.9709 | 0.3245 | 75.4654  |
| LargeArteryStroke | genus. LachnospiraceaeND3007group. id. 11317  | Simple mode               | 3 | 0.0492  | 0.0883 | 0.6336 | -0.0038 | 0.3398 | 0.9929 | 0.9709 | 0.3245 | 75.4654  |
| LargeArteryStroke | genus. LachnospiraceaeND3007group. id. 11317  | Weighted mode             | 3 | 0.0523  | 0.0795 | 0.5781 | -0.0038 | 0.3398 | 0.9929 | 0.9709 | 0.3245 | 75.4654  |
| LargeArteryStroke | genus. LachnospiraceaeNK4A136group. id. 11319 | MR Egger                  | 3 | 0.9479  | 1.6036 | 0.6601 | -0.2026 | 0.3558 | 0.6705 | 1.2302 | 0.2674 | 111.7235 |
| LargeArteryStroke | genus. LachnospiraceaeNK4A136group. id. 11319 | Weighted median           | 3 | 0.0120  | 0.0636 | 0.8500 | -0.2026 | 0.3558 | 0.6705 | 1.2302 | 0.2674 | 111.7235 |
| LargeArteryStroke | genus. LachnospiraceaeNK4A136group. id. 11319 | Inverse variance weighted | 3 | 0.0354  | 0.0530 | 0.5041 | -0.2026 | 0.3558 | 0.6705 | 1.2302 | 0.2674 | 111.7235 |
| LargeArteryStroke | genus. LachnospiraceaeNK4A136group. id. 11319 | Simple mode               | 3 | -0.0034 | 0.0862 | 0.9719 | -0.2026 | 0.3558 | 0.6705 | 1.2302 | 0.2674 | 111.7235 |
| LargeArteryStroke | genus. LachnospiraceaeNK4A136group. id. 11319 | Weighted mode             | 3 | -0.0089 | 0.0836 | 0.9250 | -0.2026 | 0.3558 | 0.6705 | 1.2302 | 0.2674 | 111.7235 |
| LargeArteryStroke | genus. LachnospiraceaeUCG001. id. 11321       | MR Egger                  | 3 | 0.1270  | 1.8543 | 0.9565 | 0.0035  | 0.4115 | 0.9946 | 0.2263 | 0.6343 | 49.8184  |
| LargeArteryStroke | genus. LachnospiraceaeUCG001. id. 11321       | Weighted median           | 3 | 0.1315  | 0.0813 | 0.1061 | 0.0035  | 0.4115 | 0.9946 | 0.2263 | 0.6343 | 49.8184  |
| LargeArteryStroke | genus. LachnospiraceaeUCG001. id. 11321       | Inverse variance weighted | 3 | 0.1426  | 0.0680 | 0.0360 | 0.0035  | 0.4115 | 0.9946 | 0.2263 | 0.6343 | 49.8184  |
| LargeArteryStroke | genus. LachnospiraceaeUCG001. id. 11321       | Simple mode               | 3 | 0.1189  | 0.0917 | 0.3242 | 0.0035  | 0.4115 | 0.9946 | 0.2263 | 0.6343 | 49.8184  |
| LargeArteryStroke | genus. LachnospiraceaeUCG001. id. 11321       | Weighted mode             | 3 | 0.1205  | 0.0974 | 0.3417 | 0.0035  | 0.4115 | 0.9946 | 0.2263 | 0.6343 | 49.8184  |
| LargeArteryStroke | genus. LachnospiraceaeUCG004. id. 11324       | MR Egger                  | 3 | 0.6345  | 1.5937 | 0.7588 | -0.1421 | 0.3534 | 0.7567 | 0.6447 | 0.4220 | 155.5197 |
| LargeArteryStroke | genus. LachnospiraceaeUCG004. id. 11324       | Weighted median           | 3 | -0.0167 | 0.0702 | 0.8120 | -0.1421 | 0.3534 | 0.7567 | 0.6447 | 0.4220 | 155.5197 |
| LargeArteryStroke | genus. LachnospiraceaeUCG004. id. 11324       | Inverse variance weighted | 3 | -0.0057 | 0.0582 | 0.9221 | -0.1421 | 0.3534 | 0.7567 | 0.6447 | 0.4220 | 155.5197 |
| LargeArteryStroke | genus. LachnospiraceaeUCG004. id. 11324       | Simple mode               | 3 | -0.0268 | 0.0865 | 0.7860 | -0.1421 | 0.3534 | 0.7567 | 0.6447 | 0.4220 | 155.5197 |
| LargeArteryStroke | genus. LachnospiraceaeUCG004. id. 11324       | Weighted mode             | 3 | -0.0268 | 0.0836 | 0.7790 | -0.1421 | 0.3534 | 0.7567 | 0.6447 | 0.4220 | 155.5197 |
| LargeArteryStroke | genus. LachnospiraceaeUCG008. id. 11328       | MR Egger                  | 3 | -4.0373 | 2.2507 | 0.3238 | 0.8892  | 0.4994 | 0.3258 | 3.1937 | 0.2025 | 44.6496  |
| LargeArteryStroke | genus. LachnospiraceaeUCG008. id. 11328       | Weighted median           | 3 | -0.0590 | 0.1065 | 0.5798 | 0.8892  | 0.4994 | 0.3258 | 3.1937 | 0.2025 | 44.6496  |
| LargeArteryStroke | genus. LachnospiraceaeUCG008. id. 11328       | Inverse variance weighted | 3 | -0.0324 | 0.1060 | 0.7598 | 0.8892  | 0.4994 | 0.3258 | 3.1937 | 0.2025 | 44.6496  |
| LargeArteryStroke | genus. LachnospiraceaeUCG008. id. 11328       | Simple mode               | 3 | -0.1415 | 0.1620 | 0.4744 | 0.8892  | 0.4994 | 0.3258 | 3.1937 | 0.2025 | 44.6496  |
| LargeArteryStroke | genus. LachnospiraceaeUCG008. id. 11328       | Weighted mode             | 3 | -0.1334 | 0.1587 | 0.4892 | 0.8892  | 0.4994 | 0.3258 | 3.1937 | 0.2025 | 44.6496  |
| LargeArteryStroke | genus. LachnospiraceaeUCG010. id. 11330       | MR Egger                  | 3 | 0.9250  | 1.6550 | 0.6755 | -0.2160 | 0.3671 | 0.6615 | 0.1859 | 0.6663 | 149.2915 |
| LargeArteryStroke | genus. LachnospiraceaeUCG010. id. 11330       | Weighted median           | 3 | -0.0344 | 0.0710 | 0.6279 | -0.2160 | 0.3671 | 0.6615 | 0.1859 | 0.6663 | 149.2915 |
| LargeArteryStroke | genus. LachnospiraceaeUCG010. id. 11330       | Inverse variance weighted | 3 | -0.0479 | 0.0609 | 0.4316 | -0.2160 | 0.3671 | 0.6615 | 0.1859 | 0.6663 | 149.2915 |
| LargeArteryStroke | genus. LachnospiraceaeUCG010. id. 11330       | Simple mode               | 3 | -0.0169 | 0.0869 | 0.8636 | -0.2160 | 0.3671 | 0.6615 | 0.1859 | 0.6663 | 149.2915 |
| LargeArteryStroke | genus. LachnospiraceaeUCG010. id. 11330       | Weighted mode             | 3 | -0.0146 | 0.0878 | 0.8828 | -0.2160 | 0.3671 | 0.6615 | 0.1859 | 0.6663 | 149.2915 |
| LargeArteryStroke | genus. Lactobacillus. id. 1837                | MR Egger                  | 3 | -3.1114 | 2.7358 | 0.4592 | 0.6914  | 0.6069 | 0.4586 | 3.2937 | 0.1927 | 41.5329  |
| LargeArteryStroke | genus. Lactobacillus. id. 1837                | Weighted median           | 3 | 0.0930  | 0.1071 | 0.3854 | 0.6914  | 0.6069 | 0.4586 | 3.2937 | 0.1927 | 41.5329  |
| LargeArteryStroke | genus. Lactobacillus. id. 1837                | Inverse variance weighted | 3 | 0.0030  | 0.1083 | 0.9777 | 0.6914  | 0.6069 | 0.4586 | 3.2937 | 0.1927 | 41.5329  |
| LargeArteryStroke | genus. Lactobacillus. id. 1837                | Simple mode               | 3 | 0.0995  | 0.1307 | 0.5261 | 0.6914  | 0.6069 | 0.4586 | 3.2937 | 0.1927 | 41.5329  |
| LargeArteryStroke | genus. Lactobacillus. id. 1837                | Weighted mode             | 3 | 0.0986  | 0.1139 | 0.4781 | 0.6914  | 0.6069 | 0.4586 | 3.2937 | 0.1927 | 41.5329  |
| LargeArteryStroke | genus. Lactococcus. id. 1851                  | MR Egger                  | 3 | -1.9063 | 2.9776 | 0.6375 | 0.4219  | 0.6599 | 0.6379 | 0.5281 | 0.4674 | 64.7937  |
| LargeArteryStroke | genus. Lactococcus. id. 1851                  | Weighted median           | 3 | 0.0445  | 0.1275 | 0.7272 | 0.4219  | 0.6599 | 0.6379 | 0.5281 | 0.4674 | 64.7937  |
| LargeArteryStroke | genus. Lactococcus. id. 1851                  | Inverse variance weighted | 3 | -0.0039 | 0.1105 | 0.9718 | 0.4219  | 0.6599 | 0.6379 | 0.5281 | 0.4674 | 64.7937  |
| LargeArteryStroke | genus. Lactococcus. id. 1851                  | Simple mode               | 3 | 0.0640  | 0.1611 | 0.7297 | 0.4219  | 0.6599 | 0.6379 | 0.5281 | 0.4674 | 64.7937  |
| LargeArteryStroke | genus. Lactococcus. id. 1851                  | Weighted mode             | 3 | 0.0607  | 0.1460 | 0.7178 | 0.4219  | 0.6599 | 0.6379 | 0.5281 | 0.4674 | 64.7937  |
| LargeArteryStroke | genus. Marvinbryantia. id. 2005               | MR Egger                  | 3 | -0.9265 | 1.6927 | 0.6812 | 0.2000  | 0.3758 | 0.6887 | 0.2007 | 0.6542 | 156.3045 |
| LargeArteryStroke | genus. Marvinbryantia. id. 2005               | Weighted median           | 3 | 0.0005  | 0.0741 | 0.9951 | 0.2000  | 0.3758 | 0.6887 | 0.2007 | 0.6542 | 156.3045 |
| LargeArteryStroke | genus. Marvinbryantia. id. 2005               | Inverse variance weighted | 3 | -0.0263 | 0.0628 | 0.6747 | 0.2000  | 0.3758 | 0.6887 | 0.2007 | 0.6542 | 156.3045 |
| LargeArteryStroke | genus. Marvinbryantia. id. 2005               | Simple mode               | 3 | 0.0018  | 0.0848 | 0.9846 | 0.2000  | 0.3758 | 0.6887 | 0.2007 | 0.6542 | 156.3045 |
| LargeArteryStroke | genus. Marvinbryantia. id. 2005               | Weighted mode             | 3 | 0.0018  | 0.0849 | 0.9846 | 0.2000  | 0.3758 | 0.6887 | 0.2007 | 0.6542 | 156.3045 |
| LargeArteryStroke | genus. Odoribacter. id. 952                   | MR Egger                  | 3 | -0.5907 | 1.5566 | 0.7691 | 0.1180  | 0.3454 | 0.7904 | 0.0077 | 0.9303 | 131.2668 |
| LargeArteryStroke | genus. Odoribacter. id. 952                   | Weighted median           | 3 | -0.0663 | 0.0666 | 0.3191 | 0.1180  | 0.3454 | 0.7904 | 0.0077 | 0.9303 | 131.2668 |

|                   |                                     |                           |   |         |        |        |         |        |        |        |        |          |
|-------------------|-------------------------------------|---------------------------|---|---------|--------|--------|---------|--------|--------|--------|--------|----------|
| LargeArteryStroke | genus.Odoribacter.id.952            | Inverse variance weighted | 3 | -0.0592 | 0.0573 | 0.3015 | 0.1180  | 0.3454 | 0.7904 | 0.0077 | 0.9303 | 131.2668 |
| LargeArteryStroke | genus.Odoribacter.id.952            | Simple mode               | 3 | -0.0753 | 0.0755 | 0.4236 | 0.1180  | 0.3454 | 0.7904 | 0.0077 | 0.9303 | 131.2668 |
| LargeArteryStroke | genus.Odoribacter.id.952            | Weighted mode             | 3 | -0.0750 | 0.0737 | 0.4158 | 0.1180  | 0.3454 | 0.7904 | 0.0077 | 0.9303 | 131.2668 |
| LargeArteryStroke | genus.Olsenella.id.822              | MR Egger                  | 3 | -5.2158 | 3.0065 | 0.3329 | 1.1789  | 0.6683 | 0.3283 | 3.8885 | 0.1431 | 25.8626  |
| LargeArteryStroke | genus.Olsenella.id.822              | Weighted median           | 3 | 0.1757  | 0.1483 | 0.2360 | 1.1789  | 0.6683 | 0.3283 | 3.8885 | 0.1431 | 25.8626  |
| LargeArteryStroke | genus.Olsenella.id.822              | Inverse variance weighted | 3 | 0.0835  | 0.1541 | 0.5880 | 1.1789  | 0.6683 | 0.3283 | 3.8885 | 0.1431 | 25.8626  |
| LargeArteryStroke | genus.Olsenella.id.822              | Simple mode               | 3 | 0.2205  | 0.1878 | 0.3614 | 1.1789  | 0.6683 | 0.3283 | 3.8885 | 0.1431 | 25.8626  |
| LargeArteryStroke | genus.Olsenella.id.822              | Weighted mode             | 3 | 0.2205  | 0.1790 | 0.3432 | 1.1789  | 0.6683 | 0.3283 | 3.8885 | 0.1431 | 25.8626  |
| LargeArteryStroke | genus.Oscillibacter.id.2063         | MR Egger                  | 3 | -2.5109 | 1.9898 | 0.4266 | 0.5800  | 0.4415 | 0.4142 | 1.8087 | 0.4048 | 59.9525  |
| LargeArteryStroke | genus.Oscillibacter.id.2063         | Weighted median           | 3 | 0.0591  | 0.0949 | 0.5332 | 0.5800  | 0.4415 | 0.4142 | 1.8087 | 0.4048 | 59.9525  |
| LargeArteryStroke | genus.Oscillibacter.id.2063         | Inverse variance weighted | 3 | 0.1013  | 0.0740 | 0.1715 | 0.5800  | 0.4415 | 0.4142 | 1.8087 | 0.4048 | 59.9525  |
| LargeArteryStroke | genus.Oscillibacter.id.2063         | Simple mode               | 3 | 0.0212  | 0.1178 | 0.8739 | 0.5800  | 0.4415 | 0.4142 | 1.8087 | 0.4048 | 59.9525  |
| LargeArteryStroke | genus.Oscillibacter.id.2063         | Weighted mode             | 3 | 0.0221  | 0.1187 | 0.8695 | 0.5800  | 0.4415 | 0.4142 | 1.8087 | 0.4048 | 59.9525  |
| LargeArteryStroke | genus.Oscillospira.id.2064          | MR Egger                  | 3 | 0.2796  | 1.8721 | 0.9056 | -0.0358 | 0.4153 | 0.9452 | 0.4586 | 0.4983 | 58.9923  |
| LargeArteryStroke | genus.Oscillospira.id.2064          | Weighted median           | 3 | 0.0937  | 0.0825 | 0.2558 | -0.0358 | 0.4153 | 0.9452 | 0.4586 | 0.4983 | 58.9923  |
| LargeArteryStroke | genus.Oscillospira.id.2064          | Inverse variance weighted | 3 | 0.1181  | 0.0690 | 0.0872 | -0.0358 | 0.4153 | 0.9452 | 0.4586 | 0.4983 | 58.9923  |
| LargeArteryStroke | genus.Oscillospira.id.2064          | Simple mode               | 3 | 0.0841  | 0.0889 | 0.4439 | -0.0358 | 0.4153 | 0.9452 | 0.4586 | 0.4983 | 58.9923  |
| LargeArteryStroke | genus.Oscillospira.id.2064          | Weighted mode             | 3 | 0.0851  | 0.0911 | 0.4487 | -0.0358 | 0.4153 | 0.9452 | 0.4586 | 0.4983 | 58.9923  |
| LargeArteryStroke | genus.Oxalobacter.id.2978           | MR Egger                  | 3 | 1.7882  | 5.5385 | 0.8012 | -0.4157 | 1.2295 | 0.7924 | 4.0982 | 0.0429 | 24.7532  |
| LargeArteryStroke | genus.Oxalobacter.id.2978           | Weighted median           | 3 | -0.0750 | 0.1395 | 0.5909 | -0.4157 | 1.2295 | 0.7924 | 4.0982 | 0.0429 | 24.7532  |
| LargeArteryStroke | genus.Oxalobacter.id.2978           | Inverse variance weighted | 3 | -0.0831 | 0.1527 | 0.5866 | -0.4157 | 1.2295 | 0.7924 | 4.0982 | 0.0429 | 24.7532  |
| LargeArteryStroke | genus.Oxalobacter.id.2978           | Simple mode               | 3 | -0.0639 | 0.1897 | 0.7684 | -0.4157 | 1.2295 | 0.7924 | 4.0982 | 0.0429 | 24.7532  |
| LargeArteryStroke | genus.Oxalobacter.id.2978           | Weighted mode             | 3 | -0.0741 | 0.1818 | 0.7231 | -0.4157 | 1.2295 | 0.7924 | 4.0982 | 0.0429 | 24.7532  |
| LargeArteryStroke | genus.Parabacteroides.id.954        | MR Egger                  | 3 | 0.2506  | 3.2301 | 0.9507 | -0.0553 | 0.7165 | 0.9510 | 4.9744 | 0.0257 | 62.9155  |
| LargeArteryStroke | genus.Parabacteroides.id.954        | Weighted median           | 3 | -0.0486 | 0.0712 | 0.4945 | -0.0553 | 0.7165 | 0.9510 | 4.9744 | 0.0257 | 62.9155  |
| LargeArteryStroke | genus.Parabacteroides.id.954        | Inverse variance weighted | 3 | 0.0015  | 0.0838 | 0.9855 | -0.0553 | 0.7165 | 0.9510 | 4.9744 | 0.0257 | 62.9155  |
| LargeArteryStroke | genus.Parabacteroides.id.954        | Simple mode               | 3 | -0.0870 | 0.0916 | 0.4424 | -0.0553 | 0.7165 | 0.9510 | 4.9744 | 0.0257 | 62.9155  |
| LargeArteryStroke | genus.Parabacteroides.id.954        | Weighted mode             | 3 | -0.0825 | 0.0940 | 0.4725 | -0.0553 | 0.7165 | 0.9510 | 4.9744 | 0.0257 | 62.9155  |
| LargeArteryStroke | genus.Paraprevotella.id.962         | MR Egger                  | 3 | 1.7928  | 2.3456 | 0.5845 | -0.3964 | 0.5200 | 0.5854 | 1.0376 | 0.3084 | 62.7743  |
| LargeArteryStroke | genus.Paraprevotella.id.962         | Weighted median           | 3 | -0.0378 | 0.1017 | 0.7102 | -0.3964 | 0.5200 | 0.5854 | 1.0376 | 0.3084 | 62.7743  |
| LargeArteryStroke | genus.Paraprevotella.id.962         | Inverse variance weighted | 3 | 0.0059  | 0.0839 | 0.9437 | -0.3964 | 0.5200 | 0.5854 | 1.0376 | 0.3084 | 62.7743  |
| LargeArteryStroke | genus.Paraprevotella.id.962         | Simple mode               | 3 | -0.0580 | 0.1223 | 0.6821 | -0.3964 | 0.5200 | 0.5854 | 1.0376 | 0.3084 | 62.7743  |
| LargeArteryStroke | genus.Paraprevotella.id.962         | Weighted mode             | 3 | -0.0556 | 0.1191 | 0.6867 | -0.3964 | 0.5200 | 0.5854 | 1.0376 | 0.3084 | 62.7743  |
| LargeArteryStroke | genus.Parasutterella.id.2892        | MR Egger                  | 3 | -4.8786 | 1.7717 | 0.2218 | 1.0729  | 0.3930 | 0.2236 | 7.4708 | 0.0239 | 33.8086  |
| LargeArteryStroke | genus.Parasutterella.id.2892        | Weighted median           | 3 | -0.0629 | 0.0941 | 0.5037 | 1.0729  | 0.3930 | 0.2236 | 7.4708 | 0.0239 | 33.8086  |
| LargeArteryStroke | genus.Parasutterella.id.2892        | Inverse variance weighted | 3 | -0.0456 | 0.1254 | 0.7160 | 1.0729  | 0.3930 | 0.2236 | 7.4708 | 0.0239 | 33.8086  |
| LargeArteryStroke | genus.Parasutterella.id.2892        | Simple mode               | 3 | -0.1612 | 0.1327 | 0.3485 | 1.0729  | 0.3930 | 0.2236 | 7.4708 | 0.0239 | 33.8086  |
| LargeArteryStroke | genus.Parasutterella.id.2892        | Weighted mode             | 3 | -0.1240 | 0.1472 | 0.4882 | 1.0729  | 0.3930 | 0.2236 | 7.4708 | 0.0239 | 33.8086  |
| LargeArteryStroke | genus.Peptococcus.id.2037           | MR Egger                  | 3 | 2.1777  | 2.4736 | 0.5404 | -0.4874 | 0.5492 | 0.5379 | 1.0027 | 0.3167 | 65.9184  |
| LargeArteryStroke | genus.Peptococcus.id.2037           | Weighted median           | 3 | -0.0167 | 0.1143 | 0.8836 | -0.4874 | 0.5492 | 0.5379 | 1.0027 | 0.3167 | 65.9184  |
| LargeArteryStroke | genus.Peptococcus.id.2037           | Inverse variance weighted | 3 | -0.0160 | 0.0915 | 0.8609 | -0.4874 | 0.5492 | 0.5379 | 1.0027 | 0.3167 | 65.9184  |
| LargeArteryStroke | genus.Peptococcus.id.2037           | Simple mode               | 3 | 0.0057  | 0.1516 | 0.9734 | -0.4874 | 0.5492 | 0.5379 | 1.0027 | 0.3167 | 65.9184  |
| LargeArteryStroke | genus.Peptococcus.id.2037           | Weighted mode             | 3 | -0.0377 | 0.1598 | 0.8354 | -0.4874 | 0.5492 | 0.5379 | 1.0027 | 0.3167 | 65.9184  |
| LargeArteryStroke | genus.Phascolarctobacterium.id.2168 | MR Egger                  | 3 | 0.6002  | 2.6412 | 0.8577 | -0.1159 | 0.5858 | 0.8756 | 2.1200 | 0.1454 | 53.8612  |
| LargeArteryStroke | genus.Phascolarctobacterium.id.2168 | Weighted median           | 3 | 0.0814  | 0.0838 | 0.3316 | -0.1159 | 0.5858 | 0.8756 | 2.1200 | 0.1454 | 53.8612  |
| LargeArteryStroke | genus.Phascolarctobacterium.id.2168 | Inverse variance weighted | 3 | 0.0779  | 0.0697 | 0.2638 | -0.1159 | 0.5858 | 0.8756 | 2.1200 | 0.1454 | 53.8612  |
| LargeArteryStroke | genus.Phascolarctobacterium.id.2168 | Simple mode               | 3 | 0.1268  | 0.1080 | 0.3611 | -0.1159 | 0.5858 | 0.8756 | 2.1200 | 0.1454 | 53.8612  |
| LargeArteryStroke | genus.Phascolarctobacterium.id.2168 | Weighted mode             | 3 | 0.1005  | 0.1184 | 0.4853 | -0.1159 | 0.5858 | 0.8756 | 2.1200 | 0.1454 | 53.8612  |
| LargeArteryStroke | genus.Prevotella7.id.11182          | Inverse variance weighted | 2 | 0.1357  | 0.1349 | 0.3143 | NA      | NA     | NA     | 0.3429 | 0.5581 | 35.7045  |
| LargeArteryStroke | genus.Prevotella9.id.11183          | MR Egger                  | 3 | 1.3123  | 1.9358 | 0.6207 | -0.2687 | 0.4291 | 0.6439 | 0.3977 | 0.5283 | 54.9031  |
| LargeArteryStroke | genus.Prevotella9.id.11183          | Weighted median           | 3 | 0.0683  | 0.0840 | 0.4164 | -0.2687 | 0.4291 | 0.6439 | 0.3977 | 0.5283 | 54.9031  |
| LargeArteryStroke | genus.Prevotella9.id.11183          | Inverse variance weighted | 3 | 0.1010  | 0.0702 | 0.1501 | -0.2687 | 0.4291 | 0.6439 | 0.3977 | 0.5283 | 54.9031  |
| LargeArteryStroke | genus.Prevotella9.id.11183          | Simple mode               | 3 | 0.0640  | 0.1015 | 0.5929 | -0.2687 | 0.4291 | 0.6439 | 0.3977 | 0.5283 | 54.9031  |
| LargeArteryStroke | genus.Prevotella9.id.11183          | Weighted mode             | 3 | 0.0644  | 0.1023 | 0.5935 | -0.2687 | 0.4291 | 0.6439 | 0.3977 | 0.5283 | 54.9031  |
| LargeArteryStroke | genus.Romboutsia.id.11347           | MR Egger                  | 3 | -1.0546 | 1.5894 | 0.6271 | 0.2477  | 0.3526 | 0.6101 | 0.5549 | 0.7577 | 124.1694 |
| LargeArteryStroke | genus.Romboutsia.id.11347           | Weighted median           | 3 | 0.0729  | 0.0690 | 0.2908 | 0.2477  | 0.3526 | 0.6101 | 0.5549 | 0.7577 | 124.1694 |
| LargeArteryStroke | genus.Romboutsia.id.11347           | Inverse variance weighted | 3 | 0.0612  | 0.0585 | 0.2949 | 0.2477  | 0.3526 | 0.6101 | 0.5549 | 0.7577 | 124.1694 |
| LargeArteryStroke | genus.Romboutsia.id.11347           | Simple mode               | 3 | 0.0816  | 0.0826 | 0.4275 | 0.2477  | 0.3526 | 0.6101 | 0.5549 | 0.7577 | 124.1694 |

|                   |                                               |                           |   |         |        |        |         |        |        |        |        |          |
|-------------------|-----------------------------------------------|---------------------------|---|---------|--------|--------|---------|--------|--------|--------|--------|----------|
| LargeArteryStroke | genus. Romboutsia. id. 11347                  | Weighted mode             | 3 | 0.0842  | 0.0854 | 0.4280 | 0.2477  | 0.3526 | 0.6101 | 0.5549 | 0.7577 | 124.1694 |
| LargeArteryStroke | genus. Roseburia. id. 2012                    | MR Egger                  | 3 | -0.6950 | 1.4226 | 0.7107 | 0.1403  | 0.3156 | 0.7336 | 0.0411 | 0.8394 | 120.0022 |
| LargeArteryStroke | genus. Roseburia. id. 2012                    | Weighted median           | 3 | -0.0772 | 0.0623 | 0.2151 | 0.1403  | 0.3156 | 0.7336 | 0.0411 | 0.8394 | 120.0022 |
| LargeArteryStroke | genus. Roseburia. id. 2012                    | Inverse variance weighted | 3 | -0.0629 | 0.0520 | 0.2267 | 0.1403  | 0.3156 | 0.7336 | 0.0411 | 0.8394 | 120.0022 |
| LargeArteryStroke | genus. Roseburia. id. 2012                    | Simple mode               | 3 | -0.0827 | 0.0692 | 0.3546 | 0.1403  | 0.3156 | 0.7336 | 0.0411 | 0.8394 | 120.0022 |
| LargeArteryStroke | genus. Roseburia. id. 2012                    | Weighted mode             | 3 | -0.0830 | 0.0709 | 0.3625 | 0.1403  | 0.3156 | 0.7336 | 0.0411 | 0.8394 | 120.0022 |
| LargeArteryStroke | genus. Ruminiclostridium5. id. 11355          | MR Egger                  | 3 | -1.5025 | 1.8208 | 0.5608 | 0.3552  | 0.4040 | 0.5409 | 1.6172 | 0.2035 | 59.2768  |
| LargeArteryStroke | genus. Ruminiclostridium5. id. 11355          | Weighted median           | 3 | 0.1369  | 0.0680 | 0.0442 | 0.3552  | 0.4040 | 0.5409 | 1.6172 | 0.2035 | 59.2768  |
| LargeArteryStroke | genus. Ruminiclostridium5. id. 11355          | Inverse variance weighted | 3 | 0.0973  | 0.0630 | 0.1222 | 0.3552  | 0.4040 | 0.5409 | 1.6172 | 0.2035 | 59.2768  |
| LargeArteryStroke | genus. Ruminiclostridium5. id. 11355          | Simple mode               | 3 | 0.1533  | 0.0918 | 0.2367 | 0.3552  | 0.4040 | 0.5409 | 1.6172 | 0.2035 | 59.2768  |
| LargeArteryStroke | genus. Ruminiclostridium5. id. 11355          | Weighted mode             | 3 | 0.1508  | 0.0876 | 0.2272 | 0.3552  | 0.4040 | 0.5409 | 1.6172 | 0.2035 | 59.2768  |
| LargeArteryStroke | genus. Ruminiclostridium6. id. 11356          | MR Egger                  | 3 | -0.0482 | 1.6251 | 0.9811 | 0.0090  | 0.3605 | 0.9842 | 0.2045 | 0.6511 | 332.8879 |
| LargeArteryStroke | genus. Ruminiclostridium6. id. 11356          | Weighted median           | 3 | 0.0021  | 0.0690 | 0.9756 | 0.0090  | 0.3605 | 0.9842 | 0.2045 | 0.6511 | 332.8879 |
| LargeArteryStroke | genus. Ruminiclostridium6. id. 11356          | Inverse variance weighted | 3 | -0.0078 | 0.0597 | 0.8954 | 0.0090  | 0.3605 | 0.9842 | 0.2045 | 0.6511 | 332.8879 |
| LargeArteryStroke | genus. Ruminiclostridium6. id. 11356          | Simple mode               | 3 | 0.0122  | 0.0872 | 0.9020 | 0.0090  | 0.3605 | 0.9842 | 0.2045 | 0.6511 | 332.8879 |
| LargeArteryStroke | genus. Ruminiclostridium6. id. 11356          | Weighted mode             | 3 | 0.0108  | 0.0740 | 0.8973 | 0.0090  | 0.3605 | 0.9842 | 0.2045 | 0.6511 | 332.8879 |
| LargeArteryStroke | genus. Ruminiclostridium9. id. 11357          | MR Egger                  | 3 | 0.5087  | 1.4659 | 0.7874 | -0.0961 | 0.3252 | 0.8172 | 0.0264 | 0.8710 | 103.4558 |
| LargeArteryStroke | genus. Ruminiclostridium9. id. 11357          | Weighted median           | 3 | 0.0843  | 0.0639 | 0.1869 | -0.0961 | 0.3252 | 0.8172 | 0.0264 | 0.8710 | 103.4558 |
| LargeArteryStroke | genus. Ruminiclostridium9. id. 11357          | Inverse variance weighted | 3 | 0.0761  | 0.0537 | 0.1566 | -0.0961 | 0.3252 | 0.8172 | 0.0264 | 0.8710 | 103.4558 |
| LargeArteryStroke | genus. Ruminiclostridium9. id. 11357          | Simple mode               | 3 | 0.0900  | 0.0744 | 0.3499 | -0.0961 | 0.3252 | 0.8172 | 0.0264 | 0.8710 | 103.4558 |
| LargeArteryStroke | genus. Ruminiclostridium9. id. 11357          | Weighted mode             | 3 | 0.0903  | 0.0706 | 0.3295 | -0.0961 | 0.3252 | 0.8172 | 0.0264 | 0.8710 | 103.4558 |
| LargeArteryStroke | genus. RuminococcaceaeNK4A214group. id. 11358 | MR Egger                  | 3 | 2.3244  | 1.5291 | 0.3704 | -0.4949 | 0.3392 | 0.3826 | 2.2066 | 0.3318 | 51.5259  |
| LargeArteryStroke | genus. RuminococcaceaeNK4A214group. id. 11358 | Weighted median           | 3 | 0.0807  | 0.0691 | 0.2432 | -0.4949 | 0.3392 | 0.3826 | 2.2066 | 0.3318 | 51.5259  |
| LargeArteryStroke | genus. RuminococcaceaeNK4A214group. id. 11358 | Inverse variance weighted | 3 | 0.0955  | 0.0590 | 0.1054 | -0.4949 | 0.3392 | 0.3826 | 2.2066 | 0.3318 | 51.5259  |
| LargeArteryStroke | genus. RuminococcaceaeNK4A214group. id. 11358 | Simple mode               | 3 | 0.0824  | 0.0923 | 0.4661 | -0.4949 | 0.3392 | 0.3826 | 2.2066 | 0.3318 | 51.5259  |
| LargeArteryStroke | genus. RuminococcaceaeNK4A214group. id. 11358 | Weighted mode             | 3 | 0.0592  | 0.0853 | 0.5594 | -0.4949 | 0.3392 | 0.3826 | 2.2066 | 0.3318 | 51.5259  |
| LargeArteryStroke | genus. RuminococcaceaeUCG002. id. 11360       | MR Egger                  | 3 | 4.0007  | 1.4512 | 0.2215 | -0.8891 | 0.3220 | 0.2212 | 8.0244 | 0.0181 | 49.0660  |
| LargeArteryStroke | genus. RuminococcaceaeUCG002. id. 11360       | Weighted median           | 3 | 0.0521  | 0.0779 | 0.5040 | -0.8891 | 0.3220 | 0.2212 | 8.0244 | 0.0181 | 49.0660  |
| LargeArteryStroke | genus. RuminococcaceaeUCG002. id. 11360       | Inverse variance weighted | 3 | -0.0044 | 0.1064 | 0.9671 | -0.8891 | 0.3220 | 0.2212 | 8.0244 | 0.0181 | 49.0660  |
| LargeArteryStroke | genus. RuminococcaceaeUCG002. id. 11360       | Simple mode               | 3 | 0.1157  | 0.0945 | 0.3456 | -0.8891 | 0.3220 | 0.2212 | 8.0244 | 0.0181 | 49.0660  |
| LargeArteryStroke | genus. RuminococcaceaeUCG002. id. 11360       | Weighted mode             | 3 | 0.1115  | 0.1009 | 0.3844 | -0.8891 | 0.3220 | 0.2212 | 8.0244 | 0.0181 | 49.0660  |
| LargeArteryStroke | genus. RuminococcaceaeUCG003. id. 11361       | MR Egger                  | 3 | 3.3842  | 1.5867 | 0.2791 | -0.7315 | 0.3520 | 0.2855 | 4.5161 | 0.1046 | 42.4376  |
| LargeArteryStroke | genus. RuminococcaceaeUCG003. id. 11361       | Weighted median           | 3 | 0.1155  | 0.0727 | 0.1123 | -0.7315 | 0.3520 | 0.2855 | 4.5161 | 0.1046 | 42.4376  |
| LargeArteryStroke | genus. RuminococcaceaeUCG003. id. 11361       | Inverse variance weighted | 3 | 0.0886  | 0.0873 | 0.3097 | -0.7315 | 0.3520 | 0.2855 | 4.5161 | 0.1046 | 42.4376  |
| LargeArteryStroke | genus. RuminococcaceaeUCG003. id. 11361       | Simple mode               | 3 | 0.1876  | 0.1114 | 0.2342 | -0.7315 | 0.3520 | 0.2855 | 4.5161 | 0.1046 | 42.4376  |
| LargeArteryStroke | genus. RuminococcaceaeUCG003. id. 11361       | Weighted mode             | 3 | 0.1828  | 0.1224 | 0.2738 | -0.7315 | 0.3520 | 0.2855 | 4.5161 | 0.1046 | 42.4376  |
| LargeArteryStroke | genus. RuminococcaceaeUCG004. id. 11362       | MR Egger                  | 3 | -1.6057 | 2.3914 | 0.6236 | 0.3570  | 0.5310 | 0.6232 | 1.5527 | 0.2127 | 78.1607  |
| LargeArteryStroke | genus. RuminococcaceaeUCG004. id. 11362       | Weighted median           | 3 | 0.0224  | 0.0941 | 0.8120 | 0.3570  | 0.5310 | 0.6232 | 1.5527 | 0.2127 | 78.1607  |
| LargeArteryStroke | genus. RuminococcaceaeUCG004. id. 11362       | Inverse variance weighted | 3 | 0.0010  | 0.0750 | 0.9894 | 0.3570  | 0.5310 | 0.6232 | 1.5527 | 0.2127 | 78.1607  |
| LargeArteryStroke | genus. RuminococcaceaeUCG004. id. 11362       | Simple mode               | 3 | 0.0436  | 0.1182 | 0.7477 | 0.3570  | 0.5310 | 0.6232 | 1.5527 | 0.2127 | 78.1607  |
| LargeArteryStroke | genus. RuminococcaceaeUCG004. id. 11362       | Weighted mode             | 3 | 0.0561  | 0.1243 | 0.6961 | 0.3570  | 0.5310 | 0.6232 | 1.5527 | 0.2127 | 78.1607  |
| LargeArteryStroke | genus. RuminococcaceaeUCG005. id. 11363       | MR Egger                  | 3 | 3.1554  | 2.1650 | 0.3828 | -0.6905 | 0.4804 | 0.3870 | 6.4890 | 0.0390 | 49.9355  |
| LargeArteryStroke | genus. RuminococcaceaeUCG005. id. 11363       | Weighted median           | 3 | 0.0826  | 0.0786 | 0.2933 | -0.6905 | 0.4804 | 0.3870 | 6.4890 | 0.0390 | 49.9355  |
| LargeArteryStroke | genus. RuminococcaceaeUCG005. id. 11363       | Inverse variance weighted | 3 | 0.0456  | 0.0982 | 0.6426 | -0.6905 | 0.4804 | 0.3870 | 6.4890 | 0.0390 | 49.9355  |
| LargeArteryStroke | genus. RuminococcaceaeUCG005. id. 11363       | Simple mode               | 3 | 0.1464  | 0.1051 | 0.2982 | -0.6905 | 0.4804 | 0.3870 | 6.4890 | 0.0390 | 49.9355  |
| LargeArteryStroke | genus. RuminococcaceaeUCG005. id. 11363       | Weighted mode             | 3 | 0.1497  | 0.1235 | 0.3494 | -0.6905 | 0.4804 | 0.3870 | 6.4890 | 0.0390 | 49.9355  |
| LargeArteryStroke | genus. RuminococcaceaeUCG009. id. 11366       | MR Egger                  | 3 | -1.2073 | 2.6243 | 0.7255 | 0.2779  | 0.5824 | 0.7166 | 1.4515 | 0.2283 | 64.3612  |
| LargeArteryStroke | genus. RuminococcaceaeUCG009. id. 11366       | Weighted median           | 3 | 0.0604  | 0.1020 | 0.5536 | 0.2779  | 0.5824 | 0.7166 | 1.4515 | 0.2283 | 64.3612  |
| LargeArteryStroke | genus. RuminococcaceaeUCG009. id. 11366       | Inverse variance weighted | 3 | 0.0439  | 0.0801 | 0.5833 | 0.2779  | 0.5824 | 0.7166 | 1.4515 | 0.2283 | 64.3612  |
| LargeArteryStroke | genus. RuminococcaceaeUCG009. id. 11366       | Simple mode               | 3 | 0.0825  | 0.1277 | 0.5843 | 0.2779  | 0.5824 | 0.7166 | 1.4515 | 0.2283 | 64.3612  |
| LargeArteryStroke | genus. RuminococcaceaeUCG009. id. 11366       | Weighted mode             | 3 | 0.0825  | 0.1209 | 0.5652 | 0.2779  | 0.5824 | 0.7166 | 1.4515 | 0.2283 | 64.3612  |
| LargeArteryStroke | genus. RuminococcaceaeUCG010. id. 11367       | MR Egger                  | 3 | 4.0150  | 3.2394 | 0.4322 | -0.8784 | 0.7186 | 0.4365 | 9.5097 | 0.0086 | 33.3791  |
| LargeArteryStroke | genus. RuminococcaceaeUCG010. id. 11367       | Weighted median           | 3 | 0.0783  | 0.0927 | 0.3983 | -0.8784 | 0.7186 | 0.4365 | 9.5097 | 0.0086 | 33.3791  |
| LargeArteryStroke | genus. RuminococcaceaeUCG010. id. 11367       | Inverse variance weighted | 3 | 0.0580  | 0.1331 | 0.6631 | -0.8784 | 0.7186 | 0.4365 | 9.5097 | 0.0086 | 33.3791  |
| LargeArteryStroke | genus. RuminococcaceaeUCG010. id. 11367       | Simple mode               | 3 | 0.1656  | 0.1331 | 0.3394 | -0.8784 | 0.7186 | 0.4365 | 9.5097 | 0.0086 | 33.3791  |
| LargeArteryStroke | genus. RuminococcaceaeUCG010. id. 11367       | Weighted mode             | 3 | 0.1520  | 0.1696 | 0.4647 | -0.8784 | 0.7186 | 0.4365 | 9.5097 | 0.0086 | 33.3791  |
| LargeArteryStroke | genus. RuminococcaceaeUCG011. id. 11368       | MR Egger                  | 3 | 0.4647  | 3.0009 | 0.9022 | -0.0785 | 0.6664 | 0.9253 | 0.0717 | 0.7889 | 64.9013  |
| LargeArteryStroke | genus. RuminococcaceaeUCG011. id. 11368       | Weighted median           | 3 | 0.0974  | 0.1313 | 0.4581 | -0.0785 | 0.6664 | 0.9253 | 0.0717 | 0.7889 | 64.9013  |

|                   |                                         |                           |   |         |        |        |         |        |        |        |        |           |
|-------------------|-----------------------------------------|---------------------------|---|---------|--------|--------|---------|--------|--------|--------|--------|-----------|
| LargeArteryStroke | genus. RuminococcaceaeUCG011. id. 11368 | Inverse variance weighted | 3 | 0.1115  | 0.1114 | 0.3170 | -0.0785 | 0.6664 | 0.9253 | 0.0717 | 0.7889 | 64.9013   |
| LargeArteryStroke | genus. RuminococcaceaeUCG011. id. 11368 | Simple mode               | 3 | 0.0904  | 0.1485 | 0.6045 | -0.0785 | 0.6664 | 0.9253 | 0.0717 | 0.7889 | 64.9013   |
| LargeArteryStroke | genus. RuminococcaceaeUCG011. id. 11368 | Weighted mode             | 3 | 0.0890  | 0.1453 | 0.6026 | -0.0785 | 0.6664 | 0.9253 | 0.0717 | 0.7889 | 64.9013   |
| LargeArteryStroke | genus. RuminococcaceaeUCG013. id. 11370 | MR Egger                  | 3 | -0.4814 | 1.4577 | 0.7970 | 0.1106  | 0.3235 | 0.7902 | 0.5730 | 0.4491 | 198.4544  |
| LargeArteryStroke | genus. RuminococcaceaeUCG013. id. 11370 | Weighted median           | 3 | 0.0364  | 0.0655 | 0.5786 | 0.1106  | 0.3235 | 0.7902 | 0.5730 | 0.4491 | 198.4544  |
| LargeArteryStroke | genus. RuminococcaceaeUCG013. id. 11370 | Inverse variance weighted | 3 | 0.0168  | 0.0535 | 0.7543 | 0.1106  | 0.3235 | 0.7902 | 0.5730 | 0.4491 | 198.4544  |
| LargeArteryStroke | genus. RuminococcaceaeUCG013. id. 11370 | Simple mode               | 3 | 0.0463  | 0.0788 | 0.6162 | 0.1106  | 0.3235 | 0.7902 | 0.5730 | 0.4491 | 198.4544  |
| LargeArteryStroke | genus. RuminococcaceaeUCG013. id. 11370 | Weighted mode             | 3 | 0.0483  | 0.0787 | 0.6022 | 0.1106  | 0.3235 | 0.7902 | 0.5730 | 0.4491 | 198.4544  |
| LargeArteryStroke | genus. RuminococcaceaeUCG014. id. 11371 | MR Egger                  | 3 | 3.5692  | 1.5722 | 0.2641 | -0.7815 | 0.3488 | 0.2672 | 5.5093 | 0.0636 | 48.3076   |
| LargeArteryStroke | genus. RuminococcaceaeUCG014. id. 11371 | Weighted median           | 3 | 0.0997  | 0.0771 | 0.1960 | -0.7815 | 0.3488 | 0.2672 | 5.5093 | 0.0636 | 48.3076   |
| LargeArteryStroke | genus. RuminococcaceaeUCG014. id. 11371 | Inverse variance weighted | 3 | 0.0487  | 0.0959 | 0.6115 | -0.7815 | 0.3488 | 0.2672 | 5.5093 | 0.0636 | 48.3076   |
| LargeArteryStroke | genus. RuminococcaceaeUCG014. id. 11371 | Simple mode               | 3 | 0.1572  | 0.1026 | 0.2651 | -0.7815 | 0.3488 | 0.2672 | 5.5093 | 0.0636 | 48.3076   |
| LargeArteryStroke | genus. RuminococcaceaeUCG014. id. 11371 | Weighted mode             | 3 | 0.1555  | 0.1193 | 0.3225 | -0.7815 | 0.3488 | 0.2672 | 5.5093 | 0.0636 | 48.3076   |
| LargeArteryStroke | genus. Ruminococcusl. id. 11373         | MR Egger                  | 3 | 0.1835  | 1.4720 | 0.9211 | -0.0409 | 0.3265 | 0.9207 | 0.0016 | 0.9683 | 1507.0872 |
| LargeArteryStroke | genus. Ruminococcusl. id. 11373         | Weighted median           | 3 | 0.0022  | 0.0601 | 0.9712 | -0.0409 | 0.3265 | 0.9207 | 0.0016 | 0.9683 | 1507.0872 |
| LargeArteryStroke | genus. Ruminococcusl. id. 11373         | Inverse variance weighted | 3 | -0.0008 | 0.0539 | 0.9887 | -0.0409 | 0.3265 | 0.9207 | 0.0016 | 0.9683 | 1507.0872 |
| LargeArteryStroke | genus. Ruminococcusl. id. 11373         | Simple mode               | 3 | 0.0049  | 0.0698 | 0.9504 | -0.0409 | 0.3265 | 0.9207 | 0.0016 | 0.9683 | 1507.0872 |
| LargeArteryStroke | genus. Ruminococcusl. id. 11373         | Weighted mode             | 3 | 0.0048  | 0.0787 | 0.9568 | -0.0409 | 0.3265 | 0.9207 | 0.0016 | 0.9683 | 1507.0872 |
| LargeArteryStroke | genus. Ruminococcus2. id. 11374         | MR Egger                  | 3 | -0.5540 | 1.5298 | 0.7788 | 0.1247  | 0.3394 | 0.7759 | 0.0708 | 0.7902 | 400.3325  |
| LargeArteryStroke | genus. Ruminococcus2. id. 11374         | Weighted median           | 3 | -0.0005 | 0.0637 | 0.9941 | 0.1247  | 0.3394 | 0.7759 | 0.0708 | 0.7902 | 400.3325  |
| LargeArteryStroke | genus. Ruminococcus2. id. 11374         | Inverse variance weighted | 3 | 0.0074  | 0.0560 | 0.8943 | 0.1247  | 0.3394 | 0.7759 | 0.0708 | 0.7902 | 400.3325  |
| LargeArteryStroke | genus. Ruminococcus2. id. 11374         | Simple mode               | 3 | -0.0103 | 0.0751 | 0.9031 | 0.1247  | 0.3394 | 0.7759 | 0.0708 | 0.7902 | 400.3325  |
| LargeArteryStroke | genus. Ruminococcus2. id. 11374         | Weighted mode             | 3 | -0.0116 | 0.0773 | 0.8944 | 0.1247  | 0.3394 | 0.7759 | 0.0708 | 0.7902 | 400.3325  |
| LargeArteryStroke | genus. Senegalimassilia. id. 11160      | MR Egger                  | 3 | 1.6066  | 2.2372 | 0.6035 | -0.3450 | 0.4969 | 0.6137 | 0.7058 | 0.4008 | 65.6495   |
| LargeArteryStroke | genus. Senegalimassilia. id. 11160      | Weighted median           | 3 | 0.0148  | 0.1017 | 0.8844 | -0.3450 | 0.4969 | 0.6137 | 0.7058 | 0.4008 | 65.6495   |
| LargeArteryStroke | genus. Senegalimassilia. id. 11160      | Inverse variance weighted | 3 | 0.0545  | 0.0822 | 0.5068 | -0.3450 | 0.4969 | 0.6137 | 0.7058 | 0.4008 | 65.6495   |
| LargeArteryStroke | genus. Senegalimassilia. id. 11160      | Simple mode               | 3 | -0.0027 | 0.1193 | 0.9838 | -0.3450 | 0.4969 | 0.6137 | 0.7058 | 0.4008 | 65.6495   |
| LargeArteryStroke | genus. Senegalimassilia. id. 11160      | Weighted mode             | 3 | -0.0008 | 0.1102 | 0.9947 | -0.3450 | 0.4969 | 0.6137 | 0.7058 | 0.4008 | 65.6495   |
| LargeArteryStroke | genus. Slackia. id. 825                 | MR Egger                  | 3 | -0.4160 | 2.3744 | 0.8896 | 0.0769  | 0.5274 | 0.9078 | 0.2004 | 0.6544 | 102.8008  |
| LargeArteryStroke | genus. Slackia. id. 825                 | Weighted median           | 3 | -0.0462 | 0.1048 | 0.6592 | 0.0769  | 0.5274 | 0.9078 | 0.2004 | 0.6544 | 102.8008  |
| LargeArteryStroke | genus. Slackia. id. 825                 | Inverse variance weighted | 3 | -0.0699 | 0.0871 | 0.4222 | 0.0769  | 0.5274 | 0.9078 | 0.2004 | 0.6544 | 102.8008  |
| LargeArteryStroke | genus. Slackia. id. 825                 | Simple mode               | 3 | -0.0413 | 0.1167 | 0.7570 | 0.0769  | 0.5274 | 0.9078 | 0.2004 | 0.6544 | 102.8008  |
| LargeArteryStroke | genus. Slackia. id. 825                 | Weighted mode             | 3 | -0.0404 | 0.1227 | 0.7733 | 0.0769  | 0.5274 | 0.9078 | 0.2004 | 0.6544 | 102.8008  |
| LargeArteryStroke | genus. Streptococcus. id. 1853          | MR Egger                  | 3 | -1.4818 | 1.4757 | 0.4987 | 0.3079  | 0.3274 | 0.5195 | 0.5390 | 0.4629 | 58.6942   |
| LargeArteryStroke | genus. Streptococcus. id. 1853          | Weighted median           | 3 | -0.0561 | 0.0677 | 0.4075 | 0.3079  | 0.3274 | 0.5195 | 0.5390 | 0.4629 | 58.6942   |
| LargeArteryStroke | genus. Streptococcus. id. 1853          | Inverse variance weighted | 3 | -0.0949 | 0.0541 | 0.0795 | 0.3079  | 0.3274 | 0.5195 | 0.5390 | 0.4629 | 58.6942   |
| LargeArteryStroke | genus. Streptococcus. id. 1853          | Simple mode               | 3 | -0.0551 | 0.0801 | 0.5626 | 0.3079  | 0.3274 | 0.5195 | 0.5390 | 0.4629 | 58.6942   |
| LargeArteryStroke | genus. Streptococcus. id. 1853          | Weighted mode             | 3 | -0.0547 | 0.0725 | 0.5290 | 0.3079  | 0.3274 | 0.5195 | 0.5390 | 0.4629 | 58.6942   |
| LargeArteryStroke | genus. Sutterella. id. 2896             | MR Egger                  | 3 | -0.1631 | 2.0323 | 0.9490 | 0.0416  | 0.4507 | 0.9414 | 1.4927 | 0.2218 | 104.6015  |
| LargeArteryStroke | genus. Sutterella. id. 2896             | Weighted median           | 3 | 0.0092  | 0.0743 | 0.9016 | 0.0416  | 0.4507 | 0.9414 | 1.4927 | 0.2218 | 104.6015  |
| LargeArteryStroke | genus. Sutterella. id. 2896             | Inverse variance weighted | 3 | 0.0245  | 0.0607 | 0.6861 | 0.0416  | 0.4507 | 0.9414 | 1.4927 | 0.2218 | 104.6015  |
| LargeArteryStroke | genus. Sutterella. id. 2896             | Simple mode               | 3 | -0.0229 | 0.0856 | 0.8140 | 0.0416  | 0.4507 | 0.9414 | 1.4927 | 0.2218 | 104.6015  |
| LargeArteryStroke | genus. Sutterella. id. 2896             | Weighted mode             | 3 | -0.0139 | 0.0879 | 0.8888 | 0.0416  | 0.4507 | 0.9414 | 1.4927 | 0.2218 | 104.6015  |
| LargeArteryStroke | genus. Terrisporobacter. id. 11348      | MR Egger                  | 3 | -0.3292 | 2.2825 | 0.9088 | 0.0946  | 0.5061 | 0.8824 | 0.1405 | 0.7078 | 80.2079   |
| LargeArteryStroke | genus. Terrisporobacter. id. 11348      | Weighted median           | 3 | 0.1103  | 0.1049 | 0.2931 | 0.0946  | 0.5061 | 0.8824 | 0.1405 | 0.7078 | 80.2079   |
| LargeArteryStroke | genus. Terrisporobacter. id. 11348      | Inverse variance weighted | 3 | 0.0969  | 0.0855 | 0.2572 | 0.0946  | 0.5061 | 0.8824 | 0.1405 | 0.7078 | 80.2079   |
| LargeArteryStroke | genus. Terrisporobacter. id. 11348      | Simple mode               | 3 | 0.1180  | 0.1196 | 0.4278 | 0.0946  | 0.5061 | 0.8824 | 0.1405 | 0.7078 | 80.2079   |
| LargeArteryStroke | genus. Terrisporobacter. id. 11348      | Weighted mode             | 3 | 0.1201  | 0.1155 | 0.4077 | 0.0946  | 0.5061 | 0.8824 | 0.1405 | 0.7078 | 80.2079   |
| LargeArteryStroke | genus. Turicibacter. id. 2162           | MR Egger                  | 3 | -1.5053 | 1.9764 | 0.5856 | 0.3613  | 0.4386 | 0.5613 | 0.6257 | 0.4289 | 53.8315   |
| LargeArteryStroke | genus. Turicibacter. id. 2162           | Weighted median           | 3 | 0.1085  | 0.0951 | 0.2539 | 0.3613  | 0.4386 | 0.5613 | 0.6257 | 0.4289 | 53.8315   |
| LargeArteryStroke | genus. Turicibacter. id. 2162           | Inverse variance weighted | 3 | 0.1216  | 0.0730 | 0.0959 | 0.3613  | 0.4386 | 0.5613 | 0.6257 | 0.4289 | 53.8315   |
| LargeArteryStroke | genus. Turicibacter. id. 2162           | Simple mode               | 3 | 0.0837  | 0.1120 | 0.5327 | 0.3613  | 0.4386 | 0.5613 | 0.6257 | 0.4289 | 53.8315   |
| LargeArteryStroke | genus. Turicibacter. id. 2162           | Weighted mode             | 3 | 0.0801  | 0.1162 | 0.5618 | 0.3613  | 0.4386 | 0.5613 | 0.6257 | 0.4289 | 53.8315   |
| LargeArteryStroke | genus. Tyzzerella3. id. 11335           | MR Egger                  | 3 | 1.6256  | 2.6160 | 0.6460 | -0.3982 | 0.5802 | 0.6171 | 0.1055 | 0.7453 | 40.2280   |
| LargeArteryStroke | genus. Tyzzerella3. id. 11335           | Weighted median           | 3 | -0.1273 | 0.1206 | 0.2910 | -0.3982 | 0.5802 | 0.6171 | 0.1055 | 0.7453 | 40.2280   |
| LargeArteryStroke | genus. Tyzzerella3. id. 11335           | Inverse variance weighted | 3 | -0.1685 | 0.0970 | 0.0824 | -0.3982 | 0.5802 | 0.6171 | 0.1055 | 0.7453 | 40.2280   |
| LargeArteryStroke | genus. Tyzzerella3. id. 11335           | Simple mode               | 3 | -0.1098 | 0.1561 | 0.5547 | -0.3982 | 0.5802 | 0.6171 | 0.1055 | 0.7453 | 40.2280   |
| LargeArteryStroke | genus. Tyzzerella3. id. 11335           | Weighted mode             | 3 | -0.1088 | 0.1324 | 0.4977 | -0.3982 | 0.5802 | 0.6171 | 0.1055 | 0.7453 | 40.2280   |

|                   |                                     |                           |   |         |        |        |         |        |        |        |        |          |
|-------------------|-------------------------------------|---------------------------|---|---------|--------|--------|---------|--------|--------|--------|--------|----------|
| LargeArteryStroke | genus. Veillonella. id. 2198        | MR Egger                  | 3 | 0.5712  | 1.9941 | 0.8224 | -0.1100 | 0.4422 | 0.8448 | 0.2639 | 0.6075 | 94.3355  |
| LargeArteryStroke | genus. Veillonella. id. 2198        | Weighted median           | 3 | 0.0573  | 0.0849 | 0.4998 | -0.1100 | 0.4422 | 0.8448 | 0.2639 | 0.6075 | 94.3355  |
| LargeArteryStroke | genus. Veillonella. id. 2198        | Inverse variance weighted | 3 | 0.0756  | 0.0730 | 0.3001 | -0.1100 | 0.4422 | 0.8448 | 0.2639 | 0.6075 | 94.3355  |
| LargeArteryStroke | genus. Veillonella. id. 2198        | Simple mode               | 3 | 0.0484  | 0.0994 | 0.6743 | -0.1100 | 0.4422 | 0.8448 | 0.2639 | 0.6075 | 94.3355  |
| LargeArteryStroke | genus. Veillonella. id. 2198        | Weighted mode             | 3 | 0.0461  | 0.1000 | 0.6901 | -0.1100 | 0.4422 | 0.8448 | 0.2639 | 0.6075 | 94.3355  |
| LargeArteryStroke | genus. unknowngenus. id. 1000000073 | MR Egger                  | 3 | 5.2881  | 1.8402 | 0.2132 | -1.1620 | 0.4081 | 0.2150 | 8.6607 | 0.0132 | 29.9753  |
| LargeArteryStroke | genus. unknowngenus. id. 1000000073 | Weighted median           | 3 | 0.1155  | 0.0929 | 0.2137 | -1.1620 | 0.4081 | 0.2150 | 8.6607 | 0.0132 | 29.9753  |
| LargeArteryStroke | genus. unknowngenus. id. 1000000073 | Inverse variance weighted | 3 | 0.0521  | 0.1401 | 0.7100 | -1.1620 | 0.4081 | 0.2150 | 8.6607 | 0.0132 | 29.9753  |
| LargeArteryStroke | genus. unknowngenus. id. 1000000073 | Simple mode               | 3 | 0.2110  | 0.1204 | 0.2219 | -1.1620 | 0.4081 | 0.2150 | 8.6607 | 0.0132 | 29.9753  |
| LargeArteryStroke | genus. unknowngenus. id. 1000000073 | Weighted mode             | 3 | 0.2062  | 0.1543 | 0.3132 | -1.1620 | 0.4081 | 0.2150 | 8.6607 | 0.0132 | 29.9753  |
| LargeArteryStroke | genus. unknowngenus. id. 1000001215 | MR Egger                  | 3 | -0.6249 | 2.4524 | 0.8412 | 0.1377  | 0.5437 | 0.8421 | 0.1532 | 0.6955 | 192.0331 |
| LargeArteryStroke | genus. unknowngenus. id. 1000001215 | Weighted median           | 3 | 0.0086  | 0.1056 | 0.9351 | 0.1377  | 0.5437 | 0.8421 | 0.1532 | 0.6955 | 192.0331 |
| LargeArteryStroke | genus. unknowngenus. id. 1000001215 | Inverse variance weighted | 3 | -0.0042 | 0.0907 | 0.9629 | 0.1377  | 0.5437 | 0.8421 | 0.1532 | 0.6955 | 192.0331 |
| LargeArteryStroke | genus. unknowngenus. id. 1000001215 | Simple mode               | 3 | 0.0205  | 0.1168 | 0.8767 | 0.1377  | 0.5437 | 0.8421 | 0.1532 | 0.6955 | 192.0331 |
| LargeArteryStroke | genus. unknowngenus. id. 1000001215 | Weighted mode             | 3 | 0.0187  | 0.1223 | 0.8924 | 0.1377  | 0.5437 | 0.8421 | 0.1532 | 0.6955 | 192.0331 |
| LargeArteryStroke | genus. unknowngenus. id. 1000005472 | MR Egger                  | 3 | 1.7732  | 1.8549 | 0.5143 | -0.3851 | 0.4115 | 0.5211 | 1.0225 | 0.5997 | 100.9836 |
| LargeArteryStroke | genus. unknowngenus. id. 1000005472 | Weighted median           | 3 | 0.0790  | 0.0842 | 0.3481 | -0.3851 | 0.4115 | 0.5211 | 1.0225 | 0.5997 | 100.9836 |
| LargeArteryStroke | genus. unknowngenus. id. 1000005472 | Inverse variance weighted | 3 | 0.0383  | 0.0683 | 0.5750 | -0.3851 | 0.4115 | 0.5211 | 1.0225 | 0.5997 | 100.9836 |
| LargeArteryStroke | genus. unknowngenus. id. 1000005472 | Simple mode               | 3 | 0.0933  | 0.1033 | 0.4620 | -0.3851 | 0.4115 | 0.5211 | 1.0225 | 0.5997 | 100.9836 |
| LargeArteryStroke | genus. unknowngenus. id. 1000005472 | Weighted mode             | 3 | 0.0933  | 0.1105 | 0.4876 | -0.3851 | 0.4115 | 0.5211 | 1.0225 | 0.5997 | 100.9836 |
| LargeArteryStroke | genus. unknowngenus. id. 1000005479 | MR Egger                  | 3 | 1.3900  | 2.1501 | 0.6347 | -0.3275 | 0.4767 | 0.6168 | 0.4806 | 0.4881 | 74.3287  |
| LargeArteryStroke | genus. unknowngenus. id. 1000005479 | Weighted median           | 3 | -0.0795 | 0.0938 | 0.3967 | -0.3275 | 0.4767 | 0.6168 | 0.4806 | 0.4881 | 74.3287  |
| LargeArteryStroke | genus. unknowngenus. id. 1000005479 | Inverse variance weighted | 3 | -0.0862 | 0.0786 | 0.2727 | -0.3275 | 0.4767 | 0.6168 | 0.4806 | 0.4881 | 74.3287  |
| LargeArteryStroke | genus. unknowngenus. id. 1000005479 | Simple mode               | 3 | -0.0595 | 0.1261 | 0.6834 | -0.3275 | 0.4767 | 0.6168 | 0.4806 | 0.4881 | 74.3287  |
| LargeArteryStroke | genus. unknowngenus. id. 1000005479 | Weighted mode             | 3 | -0.0540 | 0.1175 | 0.6909 | -0.3275 | 0.4767 | 0.6168 | 0.4806 | 0.4881 | 74.3287  |
| LargeArteryStroke | genus. unknowngenus. id. 1000006162 | MR Egger                  | 3 | -0.8968 | 2.6218 | 0.7902 | 0.2080  | 0.5811 | 0.7812 | 0.7954 | 0.3725 | 75.4500  |
| LargeArteryStroke | genus. unknowngenus. id. 1000006162 | Weighted median           | 3 | 0.0510  | 0.1170 | 0.6626 | 0.2080  | 0.5811 | 0.7812 | 0.7954 | 0.3725 | 75.4500  |
| LargeArteryStroke | genus. unknowngenus. id. 1000006162 | Inverse variance weighted | 3 | 0.0411  | 0.0963 | 0.6696 | 0.2080  | 0.5811 | 0.7812 | 0.7954 | 0.3725 | 75.4500  |
| LargeArteryStroke | genus. unknowngenus. id. 1000006162 | Simple mode               | 3 | 0.0650  | 0.1308 | 0.6682 | 0.2080  | 0.5811 | 0.7812 | 0.7954 | 0.3725 | 75.4500  |
| LargeArteryStroke | genus. unknowngenus. id. 1000006162 | Weighted mode             | 3 | 0.0665  | 0.1369 | 0.6751 | 0.2080  | 0.5811 | 0.7812 | 0.7954 | 0.3725 | 75.4500  |
| LargeArteryStroke | genus. unknowngenus. id. 1868       | MR Egger                  | 3 | -0.7101 | 1.8291 | 0.7642 | 0.1650  | 0.4059 | 0.7541 | 0.2951 | 0.5870 | 170.7444 |
| LargeArteryStroke | genus. unknowngenus. id. 1868       | Weighted median           | 3 | 0.0392  | 0.0801 | 0.6247 | 0.1650  | 0.4059 | 0.7541 | 0.2951 | 0.5870 | 170.7444 |
| LargeArteryStroke | genus. unknowngenus. id. 1868       | Inverse variance weighted | 3 | 0.0331  | 0.0677 | 0.6246 | 0.1650  | 0.4059 | 0.7541 | 0.2951 | 0.5870 | 170.7444 |
| LargeArteryStroke | genus. unknowngenus. id. 1868       | Simple mode               | 3 | 0.0463  | 0.0958 | 0.6766 | 0.1650  | 0.4059 | 0.7541 | 0.2951 | 0.5870 | 170.7444 |
| LargeArteryStroke | genus. unknowngenus. id. 1868       | Weighted mode             | 3 | 0.0558  | 0.0923 | 0.6069 | 0.1650  | 0.4059 | 0.7541 | 0.2951 | 0.5870 | 170.7444 |
| LargeArteryStroke | genus. unknowngenus. id. 2001       | MR Egger                  | 3 | 0.9959  | 1.8977 | 0.6923 | -0.1920 | 0.4209 | 0.7276 | 0.0214 | 0.8838 | 50.9982  |
| LargeArteryStroke | genus. unknowngenus. id. 2001       | Weighted median           | 3 | 0.1220  | 0.0807 | 0.1308 | -0.1920 | 0.4209 | 0.7276 | 0.0214 | 0.8838 | 50.9982  |
| LargeArteryStroke | genus. unknowngenus. id. 2001       | Inverse variance weighted | 3 | 0.1310  | 0.0700 | 0.0614 | -0.1920 | 0.4209 | 0.7276 | 0.0214 | 0.8838 | 50.9982  |
| LargeArteryStroke | genus. unknowngenus. id. 2001       | Simple mode               | 3 | 0.1182  | 0.1051 | 0.3774 | -0.1920 | 0.4209 | 0.7276 | 0.0214 | 0.8838 | 50.9982  |
| LargeArteryStroke | genus. unknowngenus. id. 2001       | Weighted mode             | 3 | 0.1141  | 0.0997 | 0.3711 | -0.1920 | 0.4209 | 0.7276 | 0.0214 | 0.8838 | 50.9982  |
| LargeArteryStroke | genus. unknowngenus. id. 2041       | MR Egger                  | 3 | 6.2766  | 2.0849 | 0.2042 | -1.3888 | 0.4626 | 0.2047 | 9.9261 | 0.0070 | 24.5690  |
| LargeArteryStroke | genus. unknowngenus. id. 2041       | Weighted median           | 3 | 0.1365  | 0.1099 | 0.2144 | -1.3888 | 0.4626 | 0.2047 | 9.9261 | 0.0070 | 24.5690  |
| LargeArteryStroke | genus. unknowngenus. id. 2041       | Inverse variance weighted | 3 | 0.0220  | 0.1720 | 0.8982 | -1.3888 | 0.4626 | 0.2047 | 9.9261 | 0.0070 | 24.5690  |
| LargeArteryStroke | genus. unknowngenus. id. 2041       | Simple mode               | 3 | 0.2166  | 0.1311 | 0.2402 | -1.3888 | 0.4626 | 0.2047 | 9.9261 | 0.0070 | 24.5690  |
| LargeArteryStroke | genus. unknowngenus. id. 2041       | Weighted mode             | 3 | 0.2151  | 0.1493 | 0.2864 | -1.3888 | 0.4626 | 0.2047 | 9.9261 | 0.0070 | 24.5690  |
| LargeArteryStroke | genus. unknowngenus. id. 2071       | MR Egger                  | 3 | 3.1120  | 1.6845 | 0.3158 | -0.6976 | 0.3738 | 0.3131 | 3.8656 | 0.1447 | 66.2598  |
| LargeArteryStroke | genus. unknowngenus. id. 2071       | Weighted median           | 3 | 0.0319  | 0.0841 | 0.7049 | -0.6976 | 0.3738 | 0.3131 | 3.8656 | 0.1447 | 66.2598  |
| LargeArteryStroke | genus. unknowngenus. id. 2071       | Inverse variance weighted | 3 | -0.0298 | 0.0863 | 0.7303 | -0.6976 | 0.3738 | 0.3131 | 3.8656 | 0.1447 | 66.2598  |
| LargeArteryStroke | genus. unknowngenus. id. 2071       | Simple mode               | 3 | 0.0675  | 0.1125 | 0.6095 | -0.6976 | 0.3738 | 0.3131 | 3.8656 | 0.1447 | 66.2598  |
| LargeArteryStroke | genus. unknowngenus. id. 2071       | Weighted mode             | 3 | 0.0667  | 0.1147 | 0.6196 | -0.6976 | 0.3738 | 0.3131 | 3.8656 | 0.1447 | 66.2598  |
| LargeArteryStroke | genus. unknowngenus. id. 2755       | MR Egger                  | 3 | -3.4080 | 2.0223 | 0.3409 | 0.7455  | 0.4485 | 0.3448 | 3.7335 | 0.1546 | 39.6796  |
| LargeArteryStroke | genus. unknowngenus. id. 2755       | Weighted median           | 3 | 0.0218  | 0.0962 | 0.8206 | 0.7455  | 0.4485 | 0.3448 | 3.7335 | 0.1546 | 39.6796  |
| LargeArteryStroke | genus. unknowngenus. id. 2755       | Inverse variance weighted | 3 | -0.0491 | 0.1016 | 0.6288 | 0.7455  | 0.4485 | 0.3448 | 3.7335 | 0.1546 | 39.6796  |
| LargeArteryStroke | genus. unknowngenus. id. 2755       | Simple mode               | 3 | 0.0361  | 0.1218 | 0.7948 | 0.7455  | 0.4485 | 0.3448 | 3.7335 | 0.1546 | 39.6796  |
| LargeArteryStroke | genus. unknowngenus. id. 2755       | Weighted mode             | 3 | 0.0400  | 0.1089 | 0.7485 | 0.7455  | 0.4485 | 0.3448 | 3.7335 | 0.1546 | 39.6796  |
| LargeArteryStroke | genus. unknowngenus. id. 826        | MR Egger                  | 3 | 0.2884  | 1.6193 | 0.8878 | -0.0736 | 0.3594 | 0.8715 | 0.0263 | 0.8711 | 210.8573 |
| LargeArteryStroke | genus. unknowngenus. id. 826        | Weighted median           | 3 | -0.0389 | 0.0681 | 0.5674 | -0.0736 | 0.3594 | 0.8715 | 0.0263 | 0.8711 | 210.8573 |
| LargeArteryStroke | genus. unknowngenus. id. 826        | Inverse variance weighted | 3 | -0.0428 | 0.0597 | 0.4741 | -0.0736 | 0.3594 | 0.8715 | 0.0263 | 0.8711 | 210.8573 |

|                   |                                      |                           |   |         |        |        |         |        |        |        |        |          |
|-------------------|--------------------------------------|---------------------------|---|---------|--------|--------|---------|--------|--------|--------|--------|----------|
| LargeArteryStroke | genus. unknowngenus. id. 826         | Simple mode               | 3 | -0.0328 | 0.0796 | 0.7201 | -0.0736 | 0.3594 | 0.8715 | 0.0263 | 0.8711 | 210.8573 |
| LargeArteryStroke | genus. unknowngenus. id. 826         | Weighted mode             | 3 | -0.0324 | 0.0797 | 0.7239 | -0.0736 | 0.3594 | 0.8715 | 0.0263 | 0.8711 | 210.8573 |
| LargeArteryStroke | genus. unknowngenus. id. 959         | MR Egger                  | 3 | -4.4408 | 2.8929 | 0.3676 | 0.9692  | 0.6413 | 0.3721 | 3.4601 | 0.1773 | 25.6800  |
| LargeArteryStroke | genus. unknowngenus. id. 959         | Weighted median           | 3 | 0.0385  | 0.1357 | 0.7768 | 0.9692  | 0.6413 | 0.3721 | 3.4601 | 0.1773 | 25.6800  |
| LargeArteryStroke | genus. unknowngenus. id. 959         | Inverse variance weighted | 3 | -0.0719 | 0.1383 | 0.6033 | 0.9692  | 0.6413 | 0.3721 | 3.4601 | 0.1773 | 25.6800  |
| LargeArteryStroke | genus. unknowngenus. id. 959         | Simple mode               | 3 | 0.0492  | 0.1755 | 0.8055 | 0.9692  | 0.6413 | 0.3721 | 3.4601 | 0.1773 | 25.6800  |
| LargeArteryStroke | genus. unknowngenus. id. 959         | Weighted mode             | 3 | 0.0519  | 0.1527 | 0.7664 | 0.9692  | 0.6413 | 0.3721 | 3.4601 | 0.1773 | 25.6800  |
| LargeArteryStroke | order. Actinomycetales. id. 420      | MR Egger                  | 3 | -0.5752 | 2.1054 | 0.8302 | 0.1271  | 0.4678 | 0.8311 | 1.0148 | 0.3138 | 97.2142  |
| LargeArteryStroke | order. Actinomycetales. id. 420      | Weighted median           | 3 | -0.0096 | 0.0918 | 0.9165 | 0.1271  | 0.4678 | 0.8311 | 1.0148 | 0.3138 | 97.2142  |
| LargeArteryStroke | order. Actinomycetales. id. 420      | Inverse variance weighted | 3 | -0.0036 | 0.0772 | 0.9633 | 0.1271  | 0.4678 | 0.8311 | 1.0148 | 0.3138 | 97.2142  |
| LargeArteryStroke | order. Actinomycetales. id. 420      | Simple mode               | 3 | -0.0344 | 0.1131 | 0.7899 | 0.1271  | 0.4678 | 0.8311 | 1.0148 | 0.3138 | 97.2142  |
| LargeArteryStroke | order. Actinomycetales. id. 420      | Weighted mode             | 3 | -0.0231 | 0.1077 | 0.8502 | 0.1271  | 0.4678 | 0.8311 | 1.0148 | 0.3138 | 97.2142  |
| LargeArteryStroke | order. Bacteroidales. id. 913        | MR Egger                  | 3 | -1.2172 | 1.6328 | 0.5922 | 0.2598  | 0.3622 | 0.6039 | 1.3476 | 0.2457 | 95.1219  |
| LargeArteryStroke | order. Bacteroidales. id. 913        | Weighted median           | 3 | -0.0313 | 0.0675 | 0.6427 | 0.2598  | 0.3622 | 0.6039 | 1.3476 | 0.2457 | 95.1219  |
| LargeArteryStroke | order. Bacteroidales. id. 913        | Inverse variance weighted | 3 | -0.0470 | 0.0519 | 0.3652 | 0.2598  | 0.3622 | 0.6039 | 1.3476 | 0.2457 | 95.1219  |
| LargeArteryStroke | order. Bacteroidales. id. 913        | Simple mode               | 3 | -0.0188 | 0.0875 | 0.8498 | 0.2598  | 0.3622 | 0.6039 | 1.3476 | 0.2457 | 95.1219  |
| LargeArteryStroke | order. Bacteroidales. id. 913        | Weighted mode             | 3 | -0.0060 | 0.0856 | 0.9508 | 0.2598  | 0.3622 | 0.6039 | 1.3476 | 0.2457 | 95.1219  |
| LargeArteryStroke | order. Bifidobacteriales. id. 432    | MR Egger                  | 3 | -2.5321 | 1.5536 | 0.3504 | 0.5772  | 0.3447 | 0.3428 | 2.8536 | 0.2401 | 72.2369  |
| LargeArteryStroke | order. Bifidobacteriales. id. 432    | Weighted median           | 3 | 0.0681  | 0.0742 | 0.3582 | 0.5772  | 0.3447 | 0.3428 | 2.8536 | 0.2401 | 72.2369  |
| LargeArteryStroke | order. Bifidobacteriales. id. 432    | Inverse variance weighted | 3 | 0.0673  | 0.0680 | 0.3221 | 0.5772  | 0.3447 | 0.3428 | 2.8536 | 0.2401 | 72.2369  |
| LargeArteryStroke | order. Bifidobacteriales. id. 432    | Simple mode               | 3 | 0.0555  | 0.1009 | 0.6378 | 0.5772  | 0.3447 | 0.3428 | 2.8536 | 0.2401 | 72.2369  |
| LargeArteryStroke | order. Bifidobacteriales. id. 432    | Weighted mode             | 3 | 0.0821  | 0.0992 | 0.4947 | 0.5772  | 0.3447 | 0.3428 | 2.8536 | 0.2401 | 72.2369  |
| LargeArteryStroke | order. Burkholderiales. id. 2874     | MR Egger                  | 3 | -2.3422 | 1.4578 | 0.3544 | 0.5187  | 0.3234 | 0.3549 | 3.5625 | 0.1684 | 70.1190  |
| LargeArteryStroke | order. Burkholderiales. id. 2874     | Weighted median           | 3 | 0.0440  | 0.0678 | 0.5167 | 0.5187  | 0.3234 | 0.3549 | 3.5625 | 0.1684 | 70.1190  |
| LargeArteryStroke | order. Burkholderiales. id. 2874     | Inverse variance weighted | 3 | -0.0054 | 0.0710 | 0.9390 | 0.5187  | 0.3234 | 0.3549 | 3.5625 | 0.1684 | 70.1190  |
| LargeArteryStroke | order. Burkholderiales. id. 2874     | Simple mode               | 3 | 0.0542  | 0.0851 | 0.5896 | 0.5187  | 0.3234 | 0.3549 | 3.5625 | 0.1684 | 70.1190  |
| LargeArteryStroke | order. Burkholderiales. id. 2874     | Weighted mode             | 3 | 0.0551  | 0.0793 | 0.5592 | 0.5187  | 0.3234 | 0.3549 | 3.5625 | 0.1684 | 70.1190  |
| LargeArteryStroke | order. Clostridiales. id. 1863       | MR Egger                  | 3 | 1.8180  | 1.4062 | 0.4191 | -0.3992 | 0.3119 | 0.4223 | 1.9319 | 0.3806 | 113.9748 |
| LargeArteryStroke | order. Clostridiales. id. 1863       | Weighted median           | 3 | 0.0643  | 0.0647 | 0.3197 | -0.3992 | 0.3119 | 0.4223 | 1.9319 | 0.3806 | 113.9748 |
| LargeArteryStroke | order. Clostridiales. id. 1863       | Inverse variance weighted | 3 | 0.0198  | 0.0514 | 0.7004 | -0.3992 | 0.3119 | 0.4223 | 1.9319 | 0.3806 | 113.9748 |
| LargeArteryStroke | order. Clostridiales. id. 1863       | Simple mode               | 3 | 0.0758  | 0.0828 | 0.4570 | -0.3992 | 0.3119 | 0.4223 | 1.9319 | 0.3806 | 113.9748 |
| LargeArteryStroke | order. Clostridiales. id. 1863       | Weighted mode             | 3 | 0.0761  | 0.0902 | 0.4878 | -0.3992 | 0.3119 | 0.4223 | 1.9319 | 0.3806 | 113.9748 |
| LargeArteryStroke | order. Coriobacteriales. id. 810     | MR Egger                  | 3 | -1.3229 | 1.5814 | 0.5565 | 0.3022  | 0.3510 | 0.5474 | 1.2339 | 0.2667 | 106.7875 |
| LargeArteryStroke | order. Coriobacteriales. id. 810     | Weighted median           | 3 | 0.0378  | 0.0677 | 0.5764 | 0.3022  | 0.3510 | 0.5474 | 1.2339 | 0.2667 | 106.7875 |
| LargeArteryStroke | order. Coriobacteriales. id. 810     | Inverse variance weighted | 3 | 0.0380  | 0.0539 | 0.4809 | 0.3022  | 0.3510 | 0.5474 | 1.2339 | 0.2667 | 106.7875 |
| LargeArteryStroke | order. Coriobacteriales. id. 810     | Simple mode               | 3 | 0.0367  | 0.0882 | 0.7178 | 0.3022  | 0.3510 | 0.5474 | 1.2339 | 0.2667 | 106.7875 |
| LargeArteryStroke | order. Coriobacteriales. id. 810     | Weighted mode             | 3 | 0.0534  | 0.0895 | 0.6114 | 0.3022  | 0.3510 | 0.5474 | 1.2339 | 0.2667 | 106.7875 |
| LargeArteryStroke | order. Desulfovibrionales. id. 3156  | MR Egger                  | 3 | 0.2314  | 1.5446 | 0.9053 | -0.0526 | 0.3427 | 0.9031 | 0.0239 | 0.8772 | 727.7159 |
| LargeArteryStroke | order. Desulfovibrionales. id. 3156  | Weighted median           | 3 | -0.0119 | 0.0665 | 0.8575 | -0.0526 | 0.3427 | 0.9031 | 0.0239 | 0.8772 | 727.7159 |
| LargeArteryStroke | order. Desulfovibrionales. id. 3156  | Inverse variance weighted | 3 | -0.0055 | 0.0564 | 0.9225 | -0.0526 | 0.3427 | 0.9031 | 0.0239 | 0.8772 | 727.7159 |
| LargeArteryStroke | order. Desulfovibrionales. id. 3156  | Simple mode               | 3 | -0.0130 | 0.0715 | 0.8726 | -0.0526 | 0.3427 | 0.9031 | 0.0239 | 0.8772 | 727.7159 |
| LargeArteryStroke | order. Desulfovibrionales. id. 3156  | Weighted mode             | 3 | -0.0130 | 0.0780 | 0.8830 | -0.0526 | 0.3427 | 0.9031 | 0.0239 | 0.8772 | 727.7159 |
| LargeArteryStroke | order. Enterobacteriales. id. 3468   | MR Egger                  | 3 | 2.5893  | 1.8551 | 0.3958 | -0.5865 | 0.4117 | 0.3896 | 3.9021 | 0.1421 | 57.6074  |
| LargeArteryStroke | order. Enterobacteriales. id. 3468   | Weighted median           | 3 | -0.1161 | 0.0766 | 0.1299 | -0.5865 | 0.4117 | 0.3896 | 3.9021 | 0.1421 | 57.6074  |
| LargeArteryStroke | order. Enterobacteriales. id. 3468   | Inverse variance weighted | 3 | -0.0516 | 0.0835 | 0.5362 | -0.5865 | 0.4117 | 0.3896 | 3.9021 | 0.1421 | 57.6074  |
| LargeArteryStroke | order. Enterobacteriales. id. 3468   | Simple mode               | 3 | -0.1236 | 0.0928 | 0.3143 | -0.5865 | 0.4117 | 0.3896 | 3.9021 | 0.1421 | 57.6074  |
| LargeArteryStroke | order. Enterobacteriales. id. 3468   | Weighted mode             | 3 | -0.1245 | 0.0945 | 0.3184 | -0.5865 | 0.4117 | 0.3896 | 3.9021 | 0.1421 | 57.6074  |
| LargeArteryStroke | order. Erysipelotrichales. id. 2148  | MR Egger                  | 3 | -0.9004 | 1.4098 | 0.6382 | 0.2116  | 0.3128 | 0.6213 | 0.3690 | 0.5435 | 128.8711 |
| LargeArteryStroke | order. Erysipelotrichales. id. 2148  | Weighted median           | 3 | 0.0798  | 0.0614 | 0.1932 | 0.2116  | 0.3128 | 0.6213 | 0.3690 | 0.5435 | 128.8711 |
| LargeArteryStroke | order. Erysipelotrichales. id. 2148  | Inverse variance weighted | 3 | 0.0529  | 0.0515 | 0.3047 | 0.2116  | 0.3128 | 0.6213 | 0.3690 | 0.5435 | 128.8711 |
| LargeArteryStroke | order. Erysipelotrichales. id. 2148  | Simple mode               | 3 | 0.0816  | 0.0774 | 0.4026 | 0.2116  | 0.3128 | 0.6213 | 0.3690 | 0.5435 | 128.8711 |
| LargeArteryStroke | order. Erysipelotrichales. id. 2148  | Weighted mode             | 3 | 0.0813  | 0.0703 | 0.3667 | 0.2116  | 0.3128 | 0.6213 | 0.3690 | 0.5435 | 128.8711 |
| LargeArteryStroke | order. Gastranaerophilales. id. 1591 | MR Egger                  | 3 | -0.6249 | 2.4524 | 0.8412 | 0.1377  | 0.5437 | 0.8421 | 0.1532 | 0.6955 | 192.0331 |
| LargeArteryStroke | order. Gastranaerophilales. id. 1591 | Weighted median           | 3 | 0.0086  | 0.1076 | 0.9363 | 0.1377  | 0.5437 | 0.8421 | 0.1532 | 0.6955 | 192.0331 |
| LargeArteryStroke | order. Gastranaerophilales. id. 1591 | Inverse variance weighted | 3 | -0.0042 | 0.0907 | 0.9629 | 0.1377  | 0.5437 | 0.8421 | 0.1532 | 0.6955 | 192.0331 |
| LargeArteryStroke | order. Gastranaerophilales. id. 1591 | Simple mode               | 3 | 0.0205  | 0.1213 | 0.8812 | 0.1377  | 0.5437 | 0.8421 | 0.1532 | 0.6955 | 192.0331 |
| LargeArteryStroke | order. Gastranaerophilales. id. 1591 | Weighted mode             | 3 | 0.0187  | 0.1231 | 0.8931 | 0.1377  | 0.5437 | 0.8421 | 0.1532 | 0.6955 | 192.0331 |
| LargeArteryStroke | order. Lactobacillales. id. 1800     | MR Egger                  | 3 | -2.8729 | 1.7108 | 0.3419 | 0.6158  | 0.3795 | 0.3516 | 5.1017 | 0.0780 | 37.9137  |

|                   |                                     |                           |   |         |        |        |         |        |        |        |        |          |
|-------------------|-------------------------------------|---------------------------|---|---------|--------|--------|---------|--------|--------|--------|--------|----------|
| LargeArteryStroke | order. Lactobacillales. id. 1800    | Weighted median           | 3 | -0.0371 | 0.0673 | 0.5814 | 0.6158  | 0.3795 | 0.3516 | 5.1017 | 0.0780 | 37.9137  |
| LargeArteryStroke | order. Lactobacillales. id. 1800    | Inverse variance weighted | 3 | -0.0992 | 0.0845 | 0.2404 | 0.6158  | 0.3795 | 0.3516 | 5.1017 | 0.0780 | 37.9137  |
| LargeArteryStroke | order. Lactobacillales. id. 1800    | Simple mode               | 3 | -0.0275 | 0.0842 | 0.7747 | 0.6158  | 0.3795 | 0.3516 | 5.1017 | 0.0780 | 37.9137  |
| LargeArteryStroke | order. Lactobacillales. id. 1800    | Weighted mode             | 3 | -0.0255 | 0.0705 | 0.7523 | 0.6158  | 0.3795 | 0.3516 | 5.1017 | 0.0780 | 37.9137  |
| LargeArteryStroke | order. MollicutesRF9. id. 11579     | MR Egger                  | 3 | 1.7732  | 1.8549 | 0.5143 | -0.3851 | 0.4115 | 0.5211 | 1.0225 | 0.5997 | 100.9836 |
| LargeArteryStroke | order. MollicutesRF9. id. 11579     | Weighted median           | 3 | 0.0790  | 0.0795 | 0.3206 | -0.3851 | 0.4115 | 0.5211 | 1.0225 | 0.5997 | 100.9836 |
| LargeArteryStroke | order. MollicutesRF9. id. 11579     | Inverse variance weighted | 3 | 0.0383  | 0.0683 | 0.5750 | -0.3851 | 0.4115 | 0.5211 | 1.0225 | 0.5997 | 100.9836 |
| LargeArteryStroke | order. MollicutesRF9. id. 11579     | Simple mode               | 3 | 0.0933  | 0.1032 | 0.4616 | -0.3851 | 0.4115 | 0.5211 | 1.0225 | 0.5997 | 100.9836 |
| LargeArteryStroke | order. MollicutesRF9. id. 11579     | Weighted mode             | 3 | 0.0933  | 0.1050 | 0.4683 | -0.3851 | 0.4115 | 0.5211 | 1.0225 | 0.5997 | 100.9836 |
| LargeArteryStroke | order. NBl.n. id. 3953              | MR Egger                  | 3 | -0.8968 | 2.6218 | 0.7902 | 0.2080  | 0.5811 | 0.7812 | 0.7954 | 0.3725 | 75.4500  |
| LargeArteryStroke | order. NBl.n. id. 3953              | Weighted median           | 3 | 0.0510  | 0.1162 | 0.6606 | 0.2080  | 0.5811 | 0.7812 | 0.7954 | 0.3725 | 75.4500  |
| LargeArteryStroke | order. NBl.n. id. 3953              | Inverse variance weighted | 3 | 0.0411  | 0.0963 | 0.6696 | 0.2080  | 0.5811 | 0.7812 | 0.7954 | 0.3725 | 75.4500  |
| LargeArteryStroke | order. NBl.n. id. 3953              | Simple mode               | 3 | 0.0650  | 0.1391 | 0.6860 | 0.2080  | 0.5811 | 0.7812 | 0.7954 | 0.3725 | 75.4500  |
| LargeArteryStroke | order. NBl.n. id. 3953              | Weighted mode             | 3 | 0.0665  | 0.1335 | 0.6676 | 0.2080  | 0.5811 | 0.7812 | 0.7954 | 0.3725 | 75.4500  |
| LargeArteryStroke | order. Pasteurellales. id. 3688     | MR Egger                  | 3 | -0.5940 | 1.9780 | 0.8143 | 0.1496  | 0.4387 | 0.7908 | 0.0841 | 0.7718 | 102.4052 |
| LargeArteryStroke | order. Pasteurellales. id. 3688     | Weighted median           | 3 | 0.0994  | 0.0863 | 0.2496 | 0.1496  | 0.4387 | 0.7908 | 0.0841 | 0.7718 | 102.4052 |
| LargeArteryStroke | order. Pasteurellales. id. 3688     | Inverse variance weighted | 3 | 0.0801  | 0.0722 | 0.2677 | 0.1496  | 0.4387 | 0.7908 | 0.0841 | 0.7718 | 102.4052 |
| LargeArteryStroke | order. Pasteurellales. id. 3688     | Simple mode               | 3 | 0.0996  | 0.0958 | 0.4078 | 0.1496  | 0.4387 | 0.7908 | 0.0841 | 0.7718 | 102.4052 |
| LargeArteryStroke | order. Pasteurellales. id. 3688     | Weighted mode             | 3 | 0.0996  | 0.1013 | 0.4292 | 0.1496  | 0.4387 | 0.7908 | 0.0841 | 0.7718 | 102.4052 |
| LargeArteryStroke | order. Rhodospirillales. id. 2667   | MR Egger                  | 3 | -2.7005 | 2.0147 | 0.4080 | 0.5908  | 0.4469 | 0.4123 | 2.5765 | 0.2758 | 51.3342  |
| LargeArteryStroke | order. Rhodospirillales. id. 2667   | Weighted median           | 3 | 0.0266  | 0.0954 | 0.7803 | 0.5908  | 0.4469 | 0.4123 | 2.5765 | 0.2758 | 51.3342  |
| LargeArteryStroke | order. Rhodospirillales. id. 2667   | Inverse variance weighted | 3 | -0.0387 | 0.0841 | 0.6453 | 0.5908  | 0.4469 | 0.4123 | 2.5765 | 0.2758 | 51.3342  |
| LargeArteryStroke | order. Rhodospirillales. id. 2667   | Simple mode               | 3 | 0.0337  | 0.1149 | 0.7967 | 0.5908  | 0.4469 | 0.4123 | 2.5765 | 0.2758 | 51.3342  |
| LargeArteryStroke | order. Rhodospirillales. id. 2667   | Weighted mode             | 3 | 0.0346  | 0.1041 | 0.7714 | 0.5908  | 0.4469 | 0.4123 | 2.5765 | 0.2758 | 51.3342  |
| LargeArteryStroke | order. Selenomonadales. id. 2165    | MR Egger                  | 3 | 1.1534  | 1.4122 | 0.5640 | -0.2471 | 0.3133 | 0.5749 | 0.7060 | 0.4008 | 100.4274 |
| LargeArteryStroke | order. Selenomonadales. id. 2165    | Weighted median           | 3 | 0.0103  | 0.0627 | 0.8694 | -0.2471 | 0.3133 | 0.5749 | 0.7060 | 0.4008 | 100.4274 |
| LargeArteryStroke | order. Selenomonadales. id. 2165    | Inverse variance weighted | 3 | 0.0404  | 0.0516 | 0.4340 | -0.2471 | 0.3133 | 0.5749 | 0.7060 | 0.4008 | 100.4274 |
| LargeArteryStroke | order. Selenomonadales. id. 2165    | Simple mode               | 3 | 0.0039  | 0.0707 | 0.9607 | -0.2471 | 0.3133 | 0.5749 | 0.7060 | 0.4008 | 100.4274 |
| LargeArteryStroke | order. Selenomonadales. id. 2165    | Weighted mode             | 3 | 0.0044  | 0.0770 | 0.9594 | -0.2471 | 0.3133 | 0.5749 | 0.7060 | 0.4008 | 100.4274 |
| LargeArteryStroke | order. Verrucomicrobiales. id. 4030 | MR Egger                  | 3 | 1.8844  | 1.7164 | 0.4703 | -0.3989 | 0.3809 | 0.4853 | 1.3891 | 0.4993 | 57.8609  |
| LargeArteryStroke | order. Verrucomicrobiales. id. 4030 | Weighted median           | 3 | 0.0555  | 0.0809 | 0.4925 | -0.3989 | 0.3809 | 0.4853 | 1.3891 | 0.4993 | 57.8609  |
| LargeArteryStroke | order. Verrucomicrobiales. id. 4030 | Inverse variance weighted | 3 | 0.0880  | 0.0629 | 0.1621 | -0.3989 | 0.3809 | 0.4853 | 1.3891 | 0.4993 | 57.8609  |
| LargeArteryStroke | order. Verrucomicrobiales. id. 4030 | Simple mode               | 3 | 0.0435  | 0.0969 | 0.6972 | -0.3989 | 0.3809 | 0.4853 | 1.3891 | 0.4993 | 57.8609  |
| LargeArteryStroke | order. Verrucomicrobiales. id. 4030 | Weighted mode             | 3 | 0.0419  | 0.0880 | 0.6807 | -0.3989 | 0.3809 | 0.4853 | 1.3891 | 0.4993 | 57.8609  |
| LargeArteryStroke | order. Victivallales. id. 2254      | MR Egger                  | 3 | -0.4336 | 2.7846 | 0.9017 | 0.1332  | 0.6169 | 0.8646 | 0.0708 | 0.7902 | 42.0863  |
| LargeArteryStroke | order. Victivallales. id. 2254      | Weighted median           | 3 | 0.1818  | 0.1141 | 0.1111 | 0.1332  | 0.6169 | 0.8646 | 0.0708 | 0.7902 | 42.0863  |
| LargeArteryStroke | order. Victivallales. id. 2254      | Inverse variance weighted | 3 | 0.1671  | 0.1015 | 0.0995 | 0.1332  | 0.6169 | 0.8646 | 0.0708 | 0.7902 | 42.0863  |
| LargeArteryStroke | order. Victivallales. id. 2254      | Simple mode               | 3 | 0.1879  | 0.1325 | 0.2920 | 0.1332  | 0.6169 | 0.8646 | 0.0708 | 0.7902 | 42.0863  |
| LargeArteryStroke | order. Victivallales. id. 2254      | Weighted mode             | 3 | 0.1868  | 0.1427 | 0.3206 | 0.1332  | 0.6169 | 0.8646 | 0.0708 | 0.7902 | 42.0863  |
| LargeArteryStroke | phylum. Actinobacteria. id. 400     | MR Egger                  | 3 | -1.5608 | 1.4152 | 0.4689 | 0.3571  | 0.3140 | 0.4592 | 1.7175 | 0.4237 | 114.3166 |
| LargeArteryStroke | phylum. Actinobacteria. id. 400     | Weighted median           | 3 | 0.0105  | 0.0652 | 0.8717 | 0.3571  | 0.3140 | 0.4592 | 1.7175 | 0.4237 | 114.3166 |
| LargeArteryStroke | phylum. Actinobacteria. id. 400     | Inverse variance weighted | 3 | 0.0475  | 0.0517 | 0.3575 | 0.3571  | 0.3140 | 0.4592 | 1.7175 | 0.4237 | 114.3166 |
| LargeArteryStroke | phylum. Actinobacteria. id. 400     | Simple mode               | 3 | -0.0033 | 0.0862 | 0.9730 | 0.3571  | 0.3140 | 0.4592 | 1.7175 | 0.4237 | 114.3166 |
| LargeArteryStroke | phylum. Actinobacteria. id. 400     | Weighted mode             | 3 | -0.0051 | 0.0853 | 0.9578 | 0.3571  | 0.3140 | 0.4592 | 1.7175 | 0.4237 | 114.3166 |
| LargeArteryStroke | phylum. Bacteroidetes. id. 905      | MR Egger                  | 3 | -1.1072 | 1.5254 | 0.6003 | 0.2364  | 0.3384 | 0.6117 | 1.1761 | 0.2781 | 105.7340 |
| LargeArteryStroke | phylum. Bacteroidetes. id. 905      | Weighted median           | 3 | -0.0267 | 0.0658 | 0.6845 | 0.2364  | 0.3384 | 0.6117 | 1.1761 | 0.2781 | 105.7340 |
| LargeArteryStroke | phylum. Bacteroidetes. id. 905      | Inverse variance weighted | 3 | -0.0420 | 0.0514 | 0.4136 | 0.2364  | 0.3384 | 0.6117 | 1.1761 | 0.2781 | 105.7340 |
| LargeArteryStroke | phylum. Bacteroidetes. id. 905      | Simple mode               | 3 | -0.0144 | 0.0782 | 0.8708 | 0.2364  | 0.3384 | 0.6117 | 1.1761 | 0.2781 | 105.7340 |
| LargeArteryStroke | phylum. Bacteroidetes. id. 905      | Weighted mode             | 3 | -0.0035 | 0.0846 | 0.9706 | 0.2364  | 0.3384 | 0.6117 | 1.1761 | 0.2781 | 105.7340 |
| LargeArteryStroke | phylum. Cyanobacteria. id. 1500     | MR Egger                  | 3 | -1.4986 | 2.2317 | 0.6236 | 0.3476  | 0.4949 | 0.6102 | 0.5751 | 0.7501 | 102.4470 |
| LargeArteryStroke | phylum. Cyanobacteria. id. 1500     | Weighted median           | 3 | 0.0296  | 0.1032 | 0.7744 | 0.3476  | 0.4949 | 0.6102 | 0.5751 | 0.7501 | 102.4470 |
| LargeArteryStroke | phylum. Cyanobacteria. id. 1500     | Inverse variance weighted | 3 | 0.0678  | 0.0826 | 0.4114 | 0.3476  | 0.4949 | 0.6102 | 0.5751 | 0.7501 | 102.4470 |
| LargeArteryStroke | phylum. Cyanobacteria. id. 1500     | Simple mode               | 3 | 0.0173  | 0.1236 | 0.9016 | 0.3476  | 0.4949 | 0.6102 | 0.5751 | 0.7501 | 102.4470 |
| LargeArteryStroke | phylum. Cyanobacteria. id. 1500     | Weighted mode             | 3 | 0.0173  | 0.1216 | 0.8999 | 0.3476  | 0.4949 | 0.6102 | 0.5751 | 0.7501 | 102.4470 |
| LargeArteryStroke | phylum. Euryarchaeota. id. 55       | Inverse variance weighted | 2 | -0.2298 | 0.2033 | 0.2585 | NA      | NA     | NA     | 2.3060 | 0.1289 | 14.9409  |
| LargeArteryStroke | phylum. Firmicutes. id. 1672        | MR Egger                  | 3 | 0.7890  | 1.4062 | 0.6745 | -0.1688 | 0.3119 | 0.6842 | 0.0631 | 0.8016 | 207.7104 |
| LargeArteryStroke | phylum. Firmicutes. id. 1672        | Weighted median           | 3 | 0.0459  | 0.0601 | 0.4449 | -0.1688 | 0.3119 | 0.6842 | 0.0631 | 0.8016 | 207.7104 |
| LargeArteryStroke | phylum. Firmicutes. id. 1672        | Inverse variance weighted | 3 | 0.0283  | 0.0514 | 0.5813 | -0.1688 | 0.3119 | 0.6842 | 0.0631 | 0.8016 | 207.7104 |

|                   |                                   |                           |   |         |        |        |         |        |        |        |        |          |
|-------------------|-----------------------------------|---------------------------|---|---------|--------|--------|---------|--------|--------|--------|--------|----------|
| LargeArteryStroke | phylum.Firmicutes.id.1672         | Simple mode               | 3 | 0.0521  | 0.0724 | 0.5466 | -0.1688 | 0.3119 | 0.6842 | 0.0631 | 0.8016 | 207.7104 |
| LargeArteryStroke | phylum.Firmicutes.id.1672         | Weighted mode             | 3 | 0.0525  | 0.0717 | 0.5401 | -0.1688 | 0.3119 | 0.6842 | 0.0631 | 0.8016 | 207.7104 |
| LargeArteryStroke | phylum.Lentisphaerae.id.2238      | MR Egger                  | 3 | -0.5435 | 2.7830 | 0.8772 | 0.1585  | 0.6165 | 0.8398 | 0.0566 | 0.8120 | 40.8223  |
| LargeArteryStroke | phylum.Lentisphaerae.id.2238      | Weighted median           | 3 | 0.1911  | 0.1171 | 0.1026 | 0.1585  | 0.6165 | 0.8398 | 0.0566 | 0.8120 | 40.8223  |
| LargeArteryStroke | phylum.Lentisphaerae.id.2238      | Inverse variance weighted | 3 | 0.1716  | 0.1014 | 0.0906 | 0.1585  | 0.6165 | 0.8398 | 0.0566 | 0.8120 | 40.8223  |
| LargeArteryStroke | phylum.Lentisphaerae.id.2238      | Simple mode               | 3 | 0.1926  | 0.1295 | 0.2753 | 0.1585  | 0.6165 | 0.8398 | 0.0566 | 0.8120 | 40.8223  |
| LargeArteryStroke | phylum.Lentisphaerae.id.2238      | Weighted mode             | 3 | 0.1924  | 0.1346 | 0.2890 | 0.1585  | 0.6165 | 0.8398 | 0.0566 | 0.8120 | 40.8223  |
| LargeArteryStroke | phylum.Proteobacteria.id.2375     | MR Egger                  | 3 | -0.3158 | 1.4101 | 0.8598 | 0.0614  | 0.3128 | 0.8766 | 0.0465 | 0.8292 | 201.6857 |
| LargeArteryStroke | phylum.Proteobacteria.id.2375     | Weighted median           | 3 | -0.0319 | 0.0577 | 0.5796 | 0.0614  | 0.3128 | 0.8766 | 0.0465 | 0.8292 | 201.6857 |
| LargeArteryStroke | phylum.Proteobacteria.id.2375     | Inverse variance weighted | 3 | -0.0392 | 0.0515 | 0.4464 | 0.0614  | 0.3128 | 0.8766 | 0.0465 | 0.8292 | 201.6857 |
| LargeArteryStroke | phylum.Proteobacteria.id.2375     | Simple mode               | 3 | -0.0301 | 0.0708 | 0.7124 | 0.0614  | 0.3128 | 0.8766 | 0.0465 | 0.8292 | 201.6857 |
| LargeArteryStroke | phylum.Proteobacteria.id.2375     | Weighted mode             | 3 | -0.0302 | 0.0693 | 0.7055 | 0.0614  | 0.3128 | 0.8766 | 0.0465 | 0.8292 | 201.6857 |
| LargeArteryStroke | phylum.Tenericutes.id.3919        | MR Egger                  | 3 | 1.8819  | 1.7676 | 0.4801 | -0.4016 | 0.3921 | 0.4924 | 1.4804 | 0.4770 | 69.0219  |
| LargeArteryStroke | phylum.Tenericutes.id.3919        | Weighted median           | 3 | 0.0974  | 0.0771 | 0.2066 | -0.4016 | 0.3921 | 0.4924 | 1.4804 | 0.4770 | 69.0219  |
| LargeArteryStroke | phylum.Tenericutes.id.3919        | Inverse variance weighted | 3 | 0.0728  | 0.0650 | 0.2626 | -0.4016 | 0.3921 | 0.4924 | 1.4804 | 0.4770 | 69.0219  |
| LargeArteryStroke | phylum.Tenericutes.id.3919        | Simple mode               | 3 | 0.1330  | 0.1047 | 0.3320 | -0.4016 | 0.3921 | 0.4924 | 1.4804 | 0.4770 | 69.0219  |
| LargeArteryStroke | phylum.Tenericutes.id.3919        | Weighted mode             | 3 | 0.1346  | 0.1033 | 0.3224 | -0.4016 | 0.3921 | 0.4924 | 1.4804 | 0.4770 | 69.0219  |
| LargeArteryStroke | phylum.Verrucomicrobia.id.3982    | MR Egger                  | 3 | 1.5549  | 1.6847 | 0.5255 | -0.3276 | 0.3738 | 0.5419 | 0.8918 | 0.6402 | 70.8533  |
| LargeArteryStroke | phylum.Verrucomicrobia.id.3982    | Weighted median           | 3 | 0.0598  | 0.0755 | 0.4286 | -0.3276 | 0.3738 | 0.5419 | 0.8918 | 0.6402 | 70.8533  |
| LargeArteryStroke | phylum.Verrucomicrobia.id.3982    | Inverse variance weighted | 3 | 0.0796  | 0.0618 | 0.1976 | -0.3276 | 0.3738 | 0.5419 | 0.8918 | 0.6402 | 70.8533  |
| LargeArteryStroke | phylum.Verrucomicrobia.id.3982    | Simple mode               | 3 | 0.0483  | 0.0901 | 0.6455 | -0.3276 | 0.3738 | 0.5419 | 0.8918 | 0.6402 | 70.8533  |
| LargeArteryStroke | phylum.Verrucomicrobia.id.3982    | Weighted mode             | 3 | 0.0459  | 0.0891 | 0.6579 | -0.3276 | 0.3738 | 0.5419 | 0.8918 | 0.6402 | 70.8533  |
| SmallVesselStroke | class.Actinobacteria.id.419       | MR Egger                  | 3 | -0.4637 | 0.5728 | 0.5667 | 0.0910  | 0.1058 | 0.5477 | 0.5946 | 0.4407 | 95.7660  |
| SmallVesselStroke | class.Actinobacteria.id.419       | Weighted median           | 3 | -0.0082 | 0.0832 | 0.9219 | 0.0910  | 0.1058 | 0.5477 | 0.5946 | 0.4407 | 95.7660  |
| SmallVesselStroke | class.Actinobacteria.id.419       | Inverse variance weighted | 3 | 0.0258  | 0.0657 | 0.6945 | 0.0910  | 0.1058 | 0.5477 | 0.5946 | 0.4407 | 95.7660  |
| SmallVesselStroke | class.Actinobacteria.id.419       | Simple mode               | 3 | -0.0315 | 0.1003 | 0.7834 | 0.0910  | 0.1058 | 0.5477 | 0.5946 | 0.4407 | 95.7660  |
| SmallVesselStroke | class.Actinobacteria.id.419       | Weighted mode             | 3 | -0.0315 | 0.1004 | 0.7837 | 0.0910  | 0.1058 | 0.5477 | 0.5946 | 0.4407 | 95.7660  |
| SmallVesselStroke | class.Alphaproteobacteria.id.2379 | MR Egger                  | 3 | 0.1014  | 0.7311 | 0.9122 | -0.0159 | 0.1352 | 0.9255 | 0.2401 | 0.6241 | 171.4940 |
| SmallVesselStroke | class.Alphaproteobacteria.id.2379 | Weighted median           | 3 | 0.0189  | 0.0992 | 0.8488 | -0.0159 | 0.1352 | 0.9255 | 0.2401 | 0.6241 | 171.4940 |
| SmallVesselStroke | class.Alphaproteobacteria.id.2379 | Inverse variance weighted | 3 | 0.0160  | 0.0840 | 0.8487 | -0.0159 | 0.1352 | 0.9255 | 0.2401 | 0.6241 | 171.4940 |
| SmallVesselStroke | class.Alphaproteobacteria.id.2379 | Simple mode               | 3 | 0.0321  | 0.1075 | 0.7934 | -0.0159 | 0.1352 | 0.9255 | 0.2401 | 0.6241 | 171.4940 |
| SmallVesselStroke | class.Alphaproteobacteria.id.2379 | Weighted mode             | 3 | 0.0283  | 0.1139 | 0.8269 | -0.0159 | 0.1352 | 0.9255 | 0.2401 | 0.6241 | 171.4940 |
| SmallVesselStroke | class.Bacilli.id.1673             | MR Egger                  | 3 | -0.3046 | 0.5574 | 0.6816 | 0.0449  | 0.1029 | 0.7379 | 0.0585 | 0.8089 | 85.0094  |
| SmallVesselStroke | class.Bacilli.id.1673             | Weighted median           | 3 | -0.0550 | 0.0743 | 0.4592 | 0.0449  | 0.1029 | 0.7379 | 0.0585 | 0.8089 | 85.0094  |
| SmallVesselStroke | class.Bacilli.id.1673             | Inverse variance weighted | 3 | -0.0628 | 0.0638 | 0.3251 | 0.0449  | 0.1029 | 0.7379 | 0.0585 | 0.8089 | 85.0094  |
| SmallVesselStroke | class.Bacilli.id.1673             | Simple mode               | 3 | -0.0468 | 0.0862 | 0.6414 | 0.0449  | 0.1029 | 0.7379 | 0.0585 | 0.8089 | 85.0094  |
| SmallVesselStroke | class.Bacilli.id.1673             | Weighted mode             | 3 | -0.0478 | 0.0854 | 0.6317 | 0.0449  | 0.1029 | 0.7379 | 0.0585 | 0.8089 | 85.0094  |
| SmallVesselStroke | class.Bacteroidia.id.912          | MR Egger                  | 3 | 0.1325  | 0.5450 | 0.8481 | -0.0137 | 0.1006 | 0.9141 | 0.9366 | 0.3332 | 80.7640  |
| SmallVesselStroke | class.Bacteroidia.id.912          | Weighted median           | 3 | 0.0853  | 0.0805 | 0.2894 | -0.0137 | 0.1006 | 0.9141 | 0.9366 | 0.3332 | 80.7640  |
| SmallVesselStroke | class.Bacteroidia.id.912          | Inverse variance weighted | 3 | 0.0590  | 0.0623 | 0.3438 | -0.0137 | 0.1006 | 0.9141 | 0.9366 | 0.3332 | 80.7640  |
| SmallVesselStroke | class.Bacteroidia.id.912          | Simple mode               | 3 | 0.0982  | 0.0950 | 0.4098 | -0.0137 | 0.1006 | 0.9141 | 0.9366 | 0.3332 | 80.7640  |
| SmallVesselStroke | class.Bacteroidia.id.912          | Weighted mode             | 3 | 0.0995  | 0.0945 | 0.4027 | -0.0137 | 0.1006 | 0.9141 | 0.9366 | 0.3332 | 80.7640  |
| SmallVesselStroke | class.Betaproteobacteria.id.2867  | MR Egger                  | 3 | 0.4004  | 0.5639 | 0.6069 | -0.0996 | 0.1041 | 0.5141 | 0.9588 | 0.6192 | 45.0486  |
| SmallVesselStroke | class.Betaproteobacteria.id.2867  | Weighted median           | 3 | -0.1486 | 0.0820 | 0.0701 | -0.0996 | 0.1041 | 0.5141 | 0.9588 | 0.6192 | 45.0486  |
| SmallVesselStroke | class.Betaproteobacteria.id.2867  | Inverse variance weighted | 3 | -0.1355 | 0.0645 | 0.0357 | -0.0996 | 0.1041 | 0.5141 | 0.9588 | 0.6192 | 45.0486  |
| SmallVesselStroke | class.Betaproteobacteria.id.2867  | Simple mode               | 3 | -0.1632 | 0.1013 | 0.2486 | -0.0996 | 0.1041 | 0.5141 | 0.9588 | 0.6192 | 45.0486  |
| SmallVesselStroke | class.Betaproteobacteria.id.2867  | Weighted mode             | 3 | -0.1661 | 0.0926 | 0.2146 | -0.0996 | 0.1041 | 0.5141 | 0.9588 | 0.6192 | 45.0486  |
| SmallVesselStroke | class.Clostridia.id.1859          | MR Egger                  | 3 | -0.2092 | 0.5451 | 0.7667 | 0.0213  | 0.1006 | 0.8670 | 0.8475 | 0.3573 | 55.8827  |
| SmallVesselStroke | class.Clostridia.id.1859          | Weighted median           | 3 | -0.1262 | 0.0743 | 0.0894 | 0.0213  | 0.1006 | 0.8670 | 0.8475 | 0.3573 | 55.8827  |
| SmallVesselStroke | class.Clostridia.id.1859          | Inverse variance weighted | 3 | -0.0944 | 0.0623 | 0.1297 | 0.0213  | 0.1006 | 0.8670 | 0.8475 | 0.3573 | 55.8827  |
| SmallVesselStroke | class.Clostridia.id.1859          | Simple mode               | 3 | -0.1336 | 0.0908 | 0.2790 | 0.0213  | 0.1006 | 0.8670 | 0.8475 | 0.3573 | 55.8827  |
| SmallVesselStroke | class.Clostridia.id.1859          | Weighted mode             | 3 | -0.1346 | 0.0915 | 0.2790 | 0.0213  | 0.1006 | 0.8670 | 0.8475 | 0.3573 | 55.8827  |
| SmallVesselStroke | class.Coriobacteriia.id.809       | MR Egger                  | 3 | -0.7308 | 0.6319 | 0.4539 | 0.1268  | 0.1167 | 0.4737 | 2.8921 | 0.2355 | 44.8496  |
| SmallVesselStroke | class.Coriobacteriia.id.809       | Weighted median           | 3 | -0.0527 | 0.0861 | 0.5404 | 0.1268  | 0.1167 | 0.4737 | 2.8921 | 0.2355 | 44.8496  |
| SmallVesselStroke | class.Coriobacteriia.id.809       | Inverse variance weighted | 3 | -0.0490 | 0.0757 | 0.5178 | 0.1268  | 0.1167 | 0.4737 | 2.8921 | 0.2355 | 44.8496  |
| SmallVesselStroke | class.Coriobacteriia.id.809       | Simple mode               | 3 | -0.0798 | 0.1077 | 0.5360 | 0.1268  | 0.1167 | 0.4737 | 2.8921 | 0.2355 | 44.8496  |
| SmallVesselStroke | class.Coriobacteriia.id.809       | Weighted mode             | 3 | -0.0681 | 0.1059 | 0.5861 | 0.1268  | 0.1167 | 0.4737 | 2.8921 | 0.2355 | 44.8496  |
| SmallVesselStroke | class.Deltaproteobacteria.id.3087 | MR Egger                  | 3 | -0.0736 | 0.5967 | 0.9219 | 0.0035  | 0.1102 | 0.9796 | 0.1215 | 0.7274 | 119.4617 |

|                   |                                   |                           |   |         |        |        |         |        |        |        |        |          |
|-------------------|-----------------------------------|---------------------------|---|---------|--------|--------|---------|--------|--------|--------|--------|----------|
| SmallVesselStroke | class.Deltaproteobacteria.id.3087 | Weighted median           | 3 | -0.0635 | 0.0805 | 0.4299 | 0.0035  | 0.1102 | 0.9796 | 0.1215 | 0.7274 | 119.4617 |
| SmallVesselStroke | class.Deltaproteobacteria.id.3087 | Inverse variance weighted | 3 | -0.0545 | 0.0683 | 0.4246 | 0.0035  | 0.1102 | 0.9796 | 0.1215 | 0.7274 | 119.4617 |
| SmallVesselStroke | class.Deltaproteobacteria.id.3087 | Simple mode               | 3 | -0.0693 | 0.0876 | 0.5120 | 0.0035  | 0.1102 | 0.9796 | 0.1215 | 0.7274 | 119.4617 |
| SmallVesselStroke | class.Deltaproteobacteria.id.3087 | Weighted mode             | 3 | -0.0702 | 0.0910 | 0.5212 | 0.0035  | 0.1102 | 0.9796 | 0.1215 | 0.7274 | 119.4617 |
| SmallVesselStroke | class.Erysipelotrichia.id.2147    | MR Egger                  | 3 | -0.1852 | 0.5457 | 0.7917 | 0.0224  | 0.1008 | 0.8605 | 0.5771 | 0.4474 | 80.8024  |
| SmallVesselStroke | class.Erysipelotrichia.id.2147    | Weighted median           | 3 | -0.0949 | 0.0796 | 0.2331 | 0.0224  | 0.1008 | 0.8605 | 0.5771 | 0.4474 | 80.8024  |
| SmallVesselStroke | class.Erysipelotrichia.id.2147    | Inverse variance weighted | 3 | -0.0645 | 0.0625 | 0.3014 | 0.0224  | 0.1008 | 0.8605 | 0.5771 | 0.4474 | 80.8024  |
| SmallVesselStroke | class.Erysipelotrichia.id.2147    | Simple mode               | 3 | -0.0980 | 0.0871 | 0.3774 | 0.0224  | 0.1008 | 0.8605 | 0.5771 | 0.4474 | 80.8024  |
| SmallVesselStroke | class.Erysipelotrichia.id.2147    | Weighted mode             | 3 | -0.0983 | 0.0882 | 0.3811 | 0.0224  | 0.1008 | 0.8605 | 0.5771 | 0.4474 | 80.8024  |
| SmallVesselStroke | class.Gammaproteobacteria.id.3303 | MR Egger                  | 3 | -0.0498 | 0.5839 | 0.9458 | 0.0178  | 0.1078 | 0.8959 | 0.0229 | 0.8798 | 163.9784 |
| SmallVesselStroke | class.Gammaproteobacteria.id.3303 | Weighted median           | 3 | 0.0395  | 0.0811 | 0.6264 | 0.0178  | 0.1078 | 0.8959 | 0.0229 | 0.8798 | 163.9784 |
| SmallVesselStroke | class.Gammaproteobacteria.id.3303 | Inverse variance weighted | 3 | 0.0459  | 0.0668 | 0.4924 | 0.0178  | 0.1078 | 0.8959 | 0.0229 | 0.8798 | 163.9784 |
| SmallVesselStroke | class.Gammaproteobacteria.id.3303 | Simple mode               | 3 | 0.0345  | 0.0849 | 0.7238 | 0.0178  | 0.1078 | 0.8959 | 0.0229 | 0.8798 | 163.9784 |
| SmallVesselStroke | class.Gammaproteobacteria.id.3303 | Weighted mode             | 3 | 0.0345  | 0.0899 | 0.7384 | 0.0178  | 0.1078 | 0.8959 | 0.0229 | 0.8798 | 163.9784 |
| SmallVesselStroke | class.Lentisphaeria.id.2250       | MR Egger                  | 3 | -1.3480 | 1.4649 | 0.5264 | 0.2400  | 0.2700 | 0.5374 | 1.7959 | 0.1802 | 21.3298  |
| SmallVesselStroke | class.Lentisphaeria.id.2250       | Weighted median           | 3 | -0.1674 | 0.1600 | 0.2955 | 0.2400  | 0.2700 | 0.5374 | 1.7959 | 0.1802 | 21.3298  |
| SmallVesselStroke | class.Lentisphaeria.id.2250       | Inverse variance weighted | 3 | -0.0543 | 0.1569 | 0.7294 | 0.2400  | 0.2700 | 0.5374 | 1.7959 | 0.1802 | 21.3298  |
| SmallVesselStroke | class.Lentisphaeria.id.2250       | Simple mode               | 3 | -0.2220 | 0.2112 | 0.4035 | 0.2400  | 0.2700 | 0.5374 | 1.7959 | 0.1802 | 21.3298  |
| SmallVesselStroke | class.Lentisphaeria.id.2250       | Weighted mode             | 3 | -0.2220 | 0.2272 | 0.4315 | 0.2400  | 0.2700 | 0.5374 | 1.7959 | 0.1802 | 21.3298  |
| SmallVesselStroke | class.Melainabacteria.id.1589     | MR Egger                  | 3 | 0.0845  | 1.0244 | 0.9476 | -0.0538 | 0.1891 | 0.8234 | 1.1599 | 0.2815 | 22.5057  |
| SmallVesselStroke | class.Melainabacteria.id.1589     | Weighted median           | 3 | -0.1770 | 0.1441 | 0.2194 | -0.0538 | 0.1891 | 0.8234 | 1.1599 | 0.2815 | 22.5057  |
| SmallVesselStroke | class.Melainabacteria.id.1589     | Inverse variance weighted | 3 | -0.2053 | 0.1082 | 0.0577 | -0.0538 | 0.1891 | 0.8234 | 1.1599 | 0.2815 | 22.5057  |
| SmallVesselStroke | class.Melainabacteria.id.1589     | Simple mode               | 3 | -0.1474 | 0.1650 | 0.4660 | -0.0538 | 0.1891 | 0.8234 | 1.1599 | 0.2815 | 22.5057  |
| SmallVesselStroke | class.Melainabacteria.id.1589     | Weighted mode             | 3 | -0.1420 | 0.1683 | 0.4878 | -0.0538 | 0.1891 | 0.8234 | 1.1599 | 0.2815 | 22.5057  |
| SmallVesselStroke | class.Methanobacteria.id.119      | Inverse variance weighted | 2 | -0.0593 | 0.1657 | 0.7204 | NA      | NA     | NA     | 0.0022 | 0.9623 | 83.9359  |
| SmallVesselStroke | class.Mollicutes.id.3920          | MR Egger                  | 3 | 0.5609  | 0.6785 | 0.5602 | -0.0901 | 0.1254 | 0.6035 | 0.5036 | 0.4779 | 49.2968  |
| SmallVesselStroke | class.Mollicutes.id.3920          | Weighted median           | 3 | 0.0840  | 0.0986 | 0.3941 | -0.0901 | 0.1254 | 0.6035 | 0.5036 | 0.4779 | 49.2968  |
| SmallVesselStroke | class.Mollicutes.id.3920          | Inverse variance weighted | 3 | 0.0768  | 0.0779 | 0.3243 | -0.0901 | 0.1254 | 0.6035 | 0.5036 | 0.4779 | 49.2968  |
| SmallVesselStroke | class.Mollicutes.id.3920          | Simple mode               | 3 | 0.1096  | 0.1158 | 0.4438 | -0.0901 | 0.1254 | 0.6035 | 0.5036 | 0.4779 | 49.2968  |
| SmallVesselStroke | class.Mollicutes.id.3920          | Weighted mode             | 3 | 0.1011  | 0.1144 | 0.4702 | -0.0901 | 0.1254 | 0.6035 | 0.5036 | 0.4779 | 49.2968  |
| SmallVesselStroke | class.Negativicutes.id.2164       | MR Egger                  | 3 | -0.3214 | 0.7744 | 0.7495 | 0.0543  | 0.1430 | 0.7688 | 2.0040 | 0.1569 | 64.7194  |
| SmallVesselStroke | class.Negativicutes.id.2164       | Weighted median           | 3 | -0.0906 | 0.0840 | 0.2804 | 0.0543  | 0.1430 | 0.7688 | 2.0040 | 0.1569 | 64.7194  |
| SmallVesselStroke | class.Negativicutes.id.2164       | Inverse variance weighted | 3 | -0.0291 | 0.0670 | 0.6645 | 0.0543  | 0.1430 | 0.7688 | 2.0040 | 0.1569 | 64.7194  |
| SmallVesselStroke | class.Negativicutes.id.2164       | Simple mode               | 3 | -0.0938 | 0.1044 | 0.4640 | 0.0543  | 0.1430 | 0.7688 | 2.0040 | 0.1569 | 64.7194  |
| SmallVesselStroke | class.Negativicutes.id.2164       | Weighted mode             | 3 | -0.0938 | 0.0972 | 0.4364 | 0.0543  | 0.1430 | 0.7688 | 2.0040 | 0.1569 | 64.7194  |
| SmallVesselStroke | class.Verrucomicrobiae.id.4029    | MR Egger                  | 3 | 0.6913  | 0.6612 | 0.4858 | -0.1138 | 0.1221 | 0.5225 | 0.8813 | 0.6436 | 48.1731  |
| SmallVesselStroke | class.Verrucomicrobiae.id.4029    | Weighted median           | 3 | 0.0517  | 0.0942 | 0.5834 | -0.1138 | 0.1221 | 0.5225 | 0.8813 | 0.6436 | 48.1731  |
| SmallVesselStroke | class.Verrucomicrobiae.id.4029    | Inverse variance weighted | 3 | 0.0794  | 0.0759 | 0.2955 | -0.1138 | 0.1221 | 0.5225 | 0.8813 | 0.6436 | 48.1731  |
| SmallVesselStroke | class.Verrucomicrobiae.id.4029    | Simple mode               | 3 | 0.0357  | 0.1110 | 0.7784 | -0.1138 | 0.1221 | 0.5225 | 0.8813 | 0.6436 | 48.1731  |
| SmallVesselStroke | class.Verrucomicrobiae.id.4029    | Weighted mode             | 3 | 0.0321  | 0.1038 | 0.7861 | -0.1138 | 0.1221 | 0.5225 | 0.8813 | 0.6436 | 48.1731  |
| SmallVesselStroke | family.Acidaminococcaceae.id.2166 | MR Egger                  | 3 | 0.9517  | 0.7327 | 0.4177 | -0.1881 | 0.1352 | 0.3967 | 3.5433 | 0.1701 | 42.4570  |
| SmallVesselStroke | family.Acidaminococcaceae.id.2166 | Weighted median           | 3 | -0.0115 | 0.1068 | 0.9143 | -0.1881 | 0.1352 | 0.3967 | 3.5433 | 0.1701 | 42.4570  |
| SmallVesselStroke | family.Acidaminococcaceae.id.2166 | Inverse variance weighted | 3 | -0.0613 | 0.1011 | 0.5448 | -0.1881 | 0.1352 | 0.3967 | 3.5433 | 0.1701 | 42.4570  |
| SmallVesselStroke | family.Acidaminococcaceae.id.2166 | Simple mode               | 3 | 0.0399  | 0.1375 | 0.7993 | -0.1881 | 0.1352 | 0.3967 | 3.5433 | 0.1701 | 42.4570  |
| SmallVesselStroke | family.Acidaminococcaceae.id.2166 | Weighted mode             | 3 | 0.0380  | 0.1397 | 0.8112 | -0.1881 | 0.1352 | 0.3967 | 3.5433 | 0.1701 | 42.4570  |
| SmallVesselStroke | family.Actinomycetaceae.id.421    | MR Egger                  | 3 | 0.1369  | 1.3300 | 0.9347 | -0.0213 | 0.2459 | 0.9449 | 2.7158 | 0.0994 | 41.7605  |
| SmallVesselStroke | family.Actinomycetaceae.id.421    | Weighted median           | 3 | -0.0003 | 0.1268 | 0.9983 | -0.0213 | 0.2459 | 0.9449 | 2.7158 | 0.0994 | 41.7605  |
| SmallVesselStroke | family.Actinomycetaceae.id.421    | Inverse variance weighted | 3 | 0.0222  | 0.1084 | 0.8376 | -0.0213 | 0.2459 | 0.9449 | 2.7158 | 0.0994 | 41.7605  |
| SmallVesselStroke | family.Actinomycetaceae.id.421    | Simple mode               | 3 | -0.0260 | 0.1593 | 0.8852 | -0.0213 | 0.2459 | 0.9449 | 2.7158 | 0.0994 | 41.7605  |
| SmallVesselStroke | family.Actinomycetaceae.id.421    | Weighted mode             | 3 | -0.0422 | 0.1575 | 0.8139 | -0.0213 | 0.2459 | 0.9449 | 2.7158 | 0.0994 | 41.7605  |
| SmallVesselStroke | family.Alcaligenaceae.id.2875     | MR Egger                  | 3 | 0.5709  | 0.5701 | 0.4996 | -0.1282 | 0.1052 | 0.4375 | 1.5287 | 0.4656 | 47.0496  |
| SmallVesselStroke | family.Alcaligenaceae.id.2875     | Weighted median           | 3 | -0.1648 | 0.0845 | 0.0512 | -0.1282 | 0.1052 | 0.4375 | 1.5287 | 0.4656 | 47.0496  |
| SmallVesselStroke | family.Alcaligenaceae.id.2875     | Inverse variance weighted | 3 | -0.1192 | 0.0652 | 0.0676 | -0.1282 | 0.1052 | 0.4375 | 1.5287 | 0.4656 | 47.0496  |
| SmallVesselStroke | family.Alcaligenaceae.id.2875     | Simple mode               | 3 | -0.1736 | 0.1016 | 0.2296 | -0.1282 | 0.1052 | 0.4375 | 1.5287 | 0.4656 | 47.0496  |
| SmallVesselStroke | family.Alcaligenaceae.id.2875     | Weighted mode             | 3 | -0.1736 | 0.0999 | 0.2244 | -0.1282 | 0.1052 | 0.4375 | 1.5287 | 0.4656 | 47.0496  |
| SmallVesselStroke | family.Bacteroidaceae.id.917      | MR Egger                  | 3 | -0.2051 | 0.5457 | 0.7712 | 0.0250  | 0.1007 | 0.8453 | 0.6731 | 0.4120 | 72.2139  |
| SmallVesselStroke | family.Bacteroidaceae.id.917      | Weighted median           | 3 | -0.0752 | 0.0765 | 0.3254 | 0.0250  | 0.1007 | 0.8453 | 0.6731 | 0.4120 | 72.2139  |
| SmallVesselStroke | family.Bacteroidaceae.id.917      | Inverse variance weighted | 3 | -0.0707 | 0.0624 | 0.2572 | 0.0250  | 0.1007 | 0.8453 | 0.6731 | 0.4120 | 72.2139  |

|                   |                                                |                           |   |         |        |        |         |        |        |        |        |           |
|-------------------|------------------------------------------------|---------------------------|---|---------|--------|--------|---------|--------|--------|--------|--------|-----------|
| SmallVesselStroke | family. Bacteroidaceae. id. 917                | Simple mode               | 3 | -0.0965 | 0.0899 | 0.3951 | 0.0250  | 0.1007 | 0.8453 | 0.6731 | 0.4120 | 72.2139   |
| SmallVesselStroke | family. Bacteroidaceae. id. 917                | Weighted mode             | 3 | -0.0918 | 0.0925 | 0.4259 | 0.0250  | 0.1007 | 0.8453 | 0.6731 | 0.4120 | 72.2139   |
| SmallVesselStroke | family. BacteroidalesS24. 7group. id. 11173    | MR Egger                  | 3 | -1.0715 | 0.8155 | 0.4142 | 0.1808  | 0.1507 | 0.4424 | 1.5269 | 0.4661 | 30.2124   |
| SmallVesselStroke | family. BacteroidalesS24. 7group. id. 11173    | Weighted median           | 3 | -0.0701 | 0.1170 | 0.5492 | 0.1808  | 0.1507 | 0.4424 | 1.5269 | 0.4661 | 30.2124   |
| SmallVesselStroke | family. BacteroidalesS24. 7group. id. 11173    | Inverse variance weighted | 3 | -0.0997 | 0.0939 | 0.2882 | 0.1808  | 0.1507 | 0.4424 | 1.5269 | 0.4661 | 30.2124   |
| SmallVesselStroke | family. BacteroidalesS24. 7group. id. 11173    | Simple mode               | 3 | -0.0511 | 0.1423 | 0.7540 | 0.1808  | 0.1507 | 0.4424 | 1.5269 | 0.4661 | 30.2124   |
| SmallVesselStroke | family. BacteroidalesS24. 7group. id. 11173    | Weighted mode             | 3 | -0.0389 | 0.1492 | 0.8188 | 0.1808  | 0.1507 | 0.4424 | 1.5269 | 0.4661 | 30.2124   |
| SmallVesselStroke | family. Bifidobacteriaceae. id. 433            | MR Egger                  | 3 | -0.5098 | 0.6007 | 0.5520 | 0.0983  | 0.1109 | 0.5382 | 0.7871 | 0.6747 | 106.4310  |
| SmallVesselStroke | family. Bifidobacteriaceae. id. 433            | Weighted median           | 3 | 0.0537  | 0.0858 | 0.5313 | 0.0983  | 0.1109 | 0.5382 | 0.7871 | 0.6747 | 106.4310  |
| SmallVesselStroke | family. Bifidobacteriaceae. id. 433            | Inverse variance weighted | 3 | 0.0192  | 0.0689 | 0.7806 | 0.0983  | 0.1109 | 0.5382 | 0.7871 | 0.6747 | 106.4310  |
| SmallVesselStroke | family. Bifidobacteriaceae. id. 433            | Simple mode               | 3 | 0.0598  | 0.0964 | 0.5981 | 0.0983  | 0.1109 | 0.5382 | 0.7871 | 0.6747 | 106.4310  |
| SmallVesselStroke | family. Bifidobacteriaceae. id. 433            | Weighted mode             | 3 | 0.0603  | 0.0981 | 0.6015 | 0.0983  | 0.1109 | 0.5382 | 0.7871 | 0.6747 | 106.4310  |
| SmallVesselStroke | family. Christensenellaceae. id. 1866          | MR Egger                  | 3 | -0.9798 | 0.5632 | 0.3321 | 0.1864  | 0.1040 | 0.3241 | 3.4022 | 0.1825 | 49.4713   |
| SmallVesselStroke | family. Christensenellaceae. id. 1866          | Weighted median           | 3 | 0.0484  | 0.0930 | 0.6027 | 0.1864  | 0.1040 | 0.3241 | 3.4022 | 0.1825 | 49.4713   |
| SmallVesselStroke | family. Christensenellaceae. id. 1866          | Inverse variance weighted | 3 | 0.0226  | 0.0841 | 0.7883 | 0.1864  | 0.1040 | 0.3241 | 3.4022 | 0.1825 | 49.4713   |
| SmallVesselStroke | family. Christensenellaceae. id. 1866          | Simple mode               | 3 | 0.0739  | 0.1124 | 0.5784 | 0.1864  | 0.1040 | 0.3241 | 3.4022 | 0.1825 | 49.4713   |
| SmallVesselStroke | family. Christensenellaceae. id. 1866          | Weighted mode             | 3 | 0.0793  | 0.1182 | 0.5716 | 0.1864  | 0.1040 | 0.3241 | 3.4022 | 0.1825 | 49.4713   |
| SmallVesselStroke | family. Clostridiaceae1. id. 1869              | MR Egger                  | 3 | -0.5830 | 0.9710 | 0.6557 | 0.0872  | 0.1795 | 0.7120 | 2.5291 | 0.1118 | 31.7657   |
| SmallVesselStroke | family. Clostridiaceae1. id. 1869              | Weighted median           | 3 | -0.1442 | 0.0916 | 0.1153 | 0.0872  | 0.1795 | 0.7120 | 2.5291 | 0.1118 | 31.7657   |
| SmallVesselStroke | family. Clostridiaceae1. id. 1869              | Inverse variance weighted | 3 | -0.1143 | 0.0876 | 0.1922 | 0.0872  | 0.1795 | 0.7120 | 2.5291 | 0.1118 | 31.7657   |
| SmallVesselStroke | family. Clostridiaceae1. id. 1869              | Simple mode               | 3 | -0.2050 | 0.1331 | 0.2632 | 0.0872  | 0.1795 | 0.7120 | 2.5291 | 0.1118 | 31.7657   |
| SmallVesselStroke | family. Clostridiaceae1. id. 1869              | Weighted mode             | 3 | -0.2036 | 0.1318 | 0.2624 | 0.0872  | 0.1795 | 0.7120 | 2.5291 | 0.1118 | 31.7657   |
| SmallVesselStroke | family. ClostridialesvadinBB60group. id. 11286 | MR Egger                  | 3 | -0.0071 | 0.7128 | 0.9937 | 0.0263  | 0.1316 | 0.8745 | 0.2296 | 0.6319 | 43.4924   |
| SmallVesselStroke | family. ClostridialesvadinBB60group. id. 11286 | Weighted median           | 3 | 0.1075  | 0.0982 | 0.2737 | 0.0263  | 0.1316 | 0.8745 | 0.2296 | 0.6319 | 43.4924   |
| SmallVesselStroke | family. ClostridialesvadinBB60group. id. 11286 | Inverse variance weighted | 3 | 0.1343  | 0.0815 | 0.0992 | 0.0263  | 0.1316 | 0.8745 | 0.2296 | 0.6319 | 43.4924   |
| SmallVesselStroke | family. ClostridialesvadinBB60group. id. 11286 | Simple mode               | 3 | 0.1050  | 0.1136 | 0.4527 | 0.0263  | 0.1316 | 0.8745 | 0.2296 | 0.6319 | 43.4924   |
| SmallVesselStroke | family. ClostridialesvadinBB60group. id. 11286 | Weighted mode             | 3 | 0.1053  | 0.1158 | 0.4593 | 0.0263  | 0.1316 | 0.8745 | 0.2296 | 0.6319 | 43.4924   |
| SmallVesselStroke | family. Coriobacteriaceae. id. 811             | MR Egger                  | 3 | -0.7308 | 0.6319 | 0.4539 | 0.1268  | 0.1167 | 0.4737 | 2.8921 | 0.2355 | 44.8496   |
| SmallVesselStroke | family. Coriobacteriaceae. id. 811             | Weighted median           | 3 | -0.0527 | 0.0852 | 0.5361 | 0.1268  | 0.1167 | 0.4737 | 2.8921 | 0.2355 | 44.8496   |
| SmallVesselStroke | family. Coriobacteriaceae. id. 811             | Inverse variance weighted | 3 | -0.0490 | 0.0757 | 0.5178 | 0.1268  | 0.1167 | 0.4737 | 2.8921 | 0.2355 | 44.8496   |
| SmallVesselStroke | family. Coriobacteriaceae. id. 811             | Simple mode               | 3 | -0.0798 | 0.1096 | 0.5424 | 0.1268  | 0.1167 | 0.4737 | 2.8921 | 0.2355 | 44.8496   |
| SmallVesselStroke | family. Coriobacteriaceae. id. 811             | Weighted mode             | 3 | -0.0681 | 0.1101 | 0.5992 | 0.1268  | 0.1167 | 0.4737 | 2.8921 | 0.2355 | 44.8496   |
| SmallVesselStroke | family. Defluviitaleaceae. id. 1924            | MR Egger                  | 3 | -0.1119 | 0.7863 | 0.9100 | 0.0100  | 0.1454 | 0.9562 | 0.1399 | 0.7083 | 101.8462  |
| SmallVesselStroke | family. Defluviitaleaceae. id. 1924            | Weighted median           | 3 | -0.0744 | 0.1018 | 0.4650 | 0.0100  | 0.1454 | 0.9562 | 0.1399 | 0.7083 | 101.8462  |
| SmallVesselStroke | family. Defluviitaleaceae. id. 1924            | Inverse variance weighted | 3 | -0.0581 | 0.0902 | 0.5197 | 0.0100  | 0.1454 | 0.9562 | 0.1399 | 0.7083 | 101.8462  |
| SmallVesselStroke | family. Defluviitaleaceae. id. 1924            | Simple mode               | 3 | -0.0810 | 0.1254 | 0.5845 | 0.0100  | 0.1454 | 0.9562 | 0.1399 | 0.7083 | 101.8462  |
| SmallVesselStroke | family. Defluviitaleaceae. id. 1924            | Weighted mode             | 3 | -0.0817 | 0.1243 | 0.5784 | 0.0100  | 0.1454 | 0.9562 | 0.1399 | 0.7083 | 101.8462  |
| SmallVesselStroke | family. Desulfovibrionaceae. id. 3169          | MR Egger                  | 3 | -0.1695 | 0.5973 | 0.8240 | 0.0211  | 0.1103 | 0.8799 | 0.0370 | 0.8474 | 110.4328  |
| SmallVesselStroke | family. Desulfovibrionaceae. id. 3169          | Weighted median           | 3 | -0.0585 | 0.0806 | 0.4679 | 0.0211  | 0.1103 | 0.8799 | 0.0370 | 0.8474 | 110.4328  |
| SmallVesselStroke | family. Desulfovibrionaceae. id. 3169          | Inverse variance weighted | 3 | -0.0562 | 0.0684 | 0.4109 | 0.0211  | 0.1103 | 0.8799 | 0.0370 | 0.8474 | 110.4328  |
| SmallVesselStroke | family. Desulfovibrionaceae. id. 3169          | Simple mode               | 3 | -0.0639 | 0.0911 | 0.5554 | 0.0211  | 0.1103 | 0.8799 | 0.0370 | 0.8474 | 110.4328  |
| SmallVesselStroke | family. Desulfovibrionaceae. id. 3169          | Weighted mode             | 3 | -0.0625 | 0.0896 | 0.5577 | 0.0211  | 0.1103 | 0.8799 | 0.0370 | 0.8474 | 110.4328  |
| SmallVesselStroke | family. Enterobacteriaceae. id. 3469           | MR Egger                  | 3 | -0.1386 | 0.6285 | 0.8618 | 0.0316  | 0.1161 | 0.8308 | 0.0302 | 0.8620 | 207.3541  |
| SmallVesselStroke | family. Enterobacteriaceae. id. 3469           | Weighted median           | 3 | 0.0346  | 0.0863 | 0.6880 | 0.0316  | 0.1161 | 0.8308 | 0.0302 | 0.8620 | 207.3541  |
| SmallVesselStroke | family. Enterobacteriaceae. id. 3469           | Inverse variance weighted | 3 | 0.0314  | 0.0722 | 0.6642 | 0.0316  | 0.1161 | 0.8308 | 0.0302 | 0.8620 | 207.3541  |
| SmallVesselStroke | family. Enterobacteriaceae. id. 3469           | Simple mode               | 3 | 0.0412  | 0.1023 | 0.7261 | 0.0316  | 0.1161 | 0.8308 | 0.0302 | 0.8620 | 207.3541  |
| SmallVesselStroke | family. Enterobacteriaceae. id. 3469           | Weighted mode             | 3 | 0.0397  | 0.0972 | 0.7223 | 0.0316  | 0.1161 | 0.8308 | 0.0302 | 0.8620 | 207.3541  |
| SmallVesselStroke | family. Erysipelotrichaceae. id. 2149          | MR Egger                  | 3 | -0.1852 | 0.5457 | 0.7917 | 0.0224  | 0.1008 | 0.8605 | 0.5771 | 0.4474 | 80.8024   |
| SmallVesselStroke | family. Erysipelotrichaceae. id. 2149          | Weighted median           | 3 | -0.0949 | 0.0751 | 0.2059 | 0.0224  | 0.1008 | 0.8605 | 0.5771 | 0.4474 | 80.8024   |
| SmallVesselStroke | family. Erysipelotrichaceae. id. 2149          | Inverse variance weighted | 3 | -0.0645 | 0.0625 | 0.3014 | 0.0224  | 0.1008 | 0.8605 | 0.5771 | 0.4474 | 80.8024   |
| SmallVesselStroke | family. Erysipelotrichaceae. id. 2149          | Simple mode               | 3 | -0.0980 | 0.0924 | 0.3999 | 0.0224  | 0.1008 | 0.8605 | 0.5771 | 0.4474 | 80.8024   |
| SmallVesselStroke | family. Erysipelotrichaceae. id. 2149          | Weighted mode             | 3 | -0.0983 | 0.0924 | 0.3988 | 0.0224  | 0.1008 | 0.8605 | 0.5771 | 0.4474 | 80.8024   |
| SmallVesselStroke | family. FamilyXIII. id. 1957                   | MR Egger                  | 3 | 1.1493  | 0.5597 | 0.2885 | -0.2145 | 0.1035 | 0.2861 | 4.3438 | 0.1140 | 39.2168   |
| SmallVesselStroke | family. FamilyXIII. id. 1957                   | Weighted median           | 3 | -0.0899 | 0.0865 | 0.2988 | -0.2145 | 0.1035 | 0.2861 | 4.3438 | 0.1140 | 39.2168   |
| SmallVesselStroke | family. FamilyXIII. id. 1957                   | Inverse variance weighted | 3 | -0.0035 | 0.0947 | 0.9709 | -0.2145 | 0.1035 | 0.2861 | 4.3438 | 0.1140 | 39.2168   |
| SmallVesselStroke | family. FamilyXIII. id. 1957                   | Simple mode               | 3 | -0.0942 | 0.1061 | 0.4682 | -0.2145 | 0.1035 | 0.2861 | 4.3438 | 0.1140 | 39.2168   |
| SmallVesselStroke | family. FamilyXIII. id. 1957                   | Weighted mode             | 3 | -0.0950 | 0.1023 | 0.4512 | -0.2145 | 0.1035 | 0.2861 | 4.3438 | 0.1140 | 39.2168   |
| SmallVesselStroke | family. Lachnospiraceae. id. 1987              | MR Egger                  | 3 | -0.0008 | 0.5450 | 0.9991 | -0.0001 | 0.1006 | 0.9993 | 0.0138 | 0.9066 | 1199.8088 |

|                   |                                         |                           |   |         |        |        |         |        |        |        |        |           |
|-------------------|-----------------------------------------|---------------------------|---|---------|--------|--------|---------|--------|--------|--------|--------|-----------|
| SmallVesselStroke | family. Lachnospiraceae. id. 1987       | Weighted median           | 3 | -0.0032 | 0.0738 | 0.9654 | -0.0001 | 0.1006 | 0.9993 | 0.0138 | 0.9066 | 1199.8088 |
| SmallVesselStroke | family. Lachnospiraceae. id. 1987       | Inverse variance weighted | 3 | -0.0014 | 0.0623 | 0.9825 | -0.0001 | 0.1006 | 0.9993 | 0.0138 | 0.9066 | 1199.8088 |
| SmallVesselStroke | family. Lachnospiraceae. id. 1987       | Simple mode               | 3 | -0.0046 | 0.0875 | 0.9624 | -0.0001 | 0.1006 | 0.9993 | 0.0138 | 0.9066 | 1199.8088 |
| SmallVesselStroke | family. Lachnospiraceae. id. 1987       | Weighted mode             | 3 | -0.0052 | 0.0770 | 0.9523 | -0.0001 | 0.1006 | 0.9993 | 0.0138 | 0.9066 | 1199.8088 |
| SmallVesselStroke | family. Lactobacillaceae. id. 1836      | MR Egger                  | 3 | -1.3892 | 1.2121 | 0.4567 | 0.2565  | 0.2242 | 0.4573 | 4.4575 | 0.1077 | 24.3956   |
| SmallVesselStroke | family. Lactobacillaceae. id. 1836      | Weighted median           | 3 | -0.1038 | 0.1432 | 0.4683 | 0.2565  | 0.2242 | 0.4573 | 4.4575 | 0.1077 | 24.3956   |
| SmallVesselStroke | family. Lactobacillaceae. id. 1836      | Inverse variance weighted | 3 | -0.0116 | 0.1497 | 0.9382 | 0.2565  | 0.2242 | 0.4573 | 4.4575 | 0.1077 | 24.3956   |
| SmallVesselStroke | family. Lactobacillaceae. id. 1836      | Simple mode               | 3 | -0.1666 | 0.1822 | 0.4570 | 0.2565  | 0.2242 | 0.4573 | 4.4575 | 0.1077 | 24.3956   |
| SmallVesselStroke | family. Lactobacillaceae. id. 1836      | Weighted mode             | 3 | -0.1645 | 0.1792 | 0.4557 | 0.2565  | 0.2242 | 0.4573 | 4.4575 | 0.1077 | 24.3956   |
| SmallVesselStroke | family. Methanobacteriaceae. id. 121    | Inverse variance weighted | 2 | -0.0593 | 0.1657 | 0.7204 | NA      | NA     | NA     | 0.0022 | 0.9623 | 83.9359   |
| SmallVesselStroke | family. Oxalobacteraceae. id. 2966      | MR Egger                  | 3 | 0.0925  | 0.9886 | 0.9406 | -0.0158 | 0.1831 | 0.9451 | 0.1224 | 0.7265 | 184.0995  |
| SmallVesselStroke | family. Oxalobacteraceae. id. 2966      | Weighted median           | 3 | 0.0300  | 0.1316 | 0.8197 | -0.0158 | 0.1831 | 0.9451 | 0.1224 | 0.7265 | 184.0995  |
| SmallVesselStroke | family. Oxalobacteraceae. id. 2966      | Inverse variance weighted | 3 | 0.0076  | 0.1141 | 0.9471 | -0.0158 | 0.1831 | 0.9451 | 0.1224 | 0.7265 | 184.0995  |
| SmallVesselStroke | family. Oxalobacteraceae. id. 2966      | Simple mode               | 3 | 0.0355  | 0.1493 | 0.8341 | -0.0158 | 0.1831 | 0.9451 | 0.1224 | 0.7265 | 184.0995  |
| SmallVesselStroke | family. Oxalobacteraceae. id. 2966      | Weighted mode             | 3 | 0.0359  | 0.1476 | 0.8306 | -0.0158 | 0.1831 | 0.9451 | 0.1224 | 0.7265 | 184.0995  |
| SmallVesselStroke | family. Pasteurellaceae. id. 3689       | MR Egger                  | 3 | 0.6131  | 0.7694 | 0.5717 | -0.1123 | 0.1420 | 0.5739 | 0.8086 | 0.6674 | 72.6677   |
| SmallVesselStroke | family. Pasteurellaceae. id. 3689       | Weighted median           | 3 | -0.0115 | 0.1082 | 0.9150 | -0.1123 | 0.1420 | 0.5739 | 0.8086 | 0.6674 | 72.6677   |
| SmallVesselStroke | family. Pasteurellaceae. id. 3689       | Inverse variance weighted | 3 | 0.0083  | 0.0879 | 0.9244 | -0.1123 | 0.1420 | 0.5739 | 0.8086 | 0.6674 | 72.6677   |
| SmallVesselStroke | family. Pasteurellaceae. id. 3689       | Simple mode               | 3 | -0.0316 | 0.1308 | 0.8318 | -0.1123 | 0.1420 | 0.5739 | 0.8086 | 0.6674 | 72.6677   |
| SmallVesselStroke | family. Pasteurellaceae. id. 3689       | Weighted mode             | 3 | -0.0291 | 0.1242 | 0.8364 | -0.1123 | 0.1420 | 0.5739 | 0.8086 | 0.6674 | 72.6677   |
| SmallVesselStroke | family. Peptococcaceae. id. 2024        | MR Egger                  | 3 | 0.1441  | 1.0836 | 0.9158 | -0.0111 | 0.2004 | 0.9647 | 2.4619 | 0.1166 | 40.8900   |
| SmallVesselStroke | family. Peptococcaceae. id. 2024        | Weighted median           | 3 | 0.0571  | 0.1077 | 0.5958 | -0.0111 | 0.2004 | 0.9647 | 2.4619 | 0.1166 | 40.8900   |
| SmallVesselStroke | family. Peptococcaceae. id. 2024        | Inverse variance weighted | 3 | 0.0843  | 0.0882 | 0.3392 | -0.0111 | 0.2004 | 0.9647 | 2.4619 | 0.1166 | 40.8900   |
| SmallVesselStroke | family. Peptococcaceae. id. 2024        | Simple mode               | 3 | 0.0359  | 0.1373 | 0.8182 | -0.0111 | 0.2004 | 0.9647 | 2.4619 | 0.1166 | 40.8900   |
| SmallVesselStroke | family. Peptococcaceae. id. 2024        | Weighted mode             | 3 | 0.0228  | 0.1283 | 0.8755 | -0.0111 | 0.2004 | 0.9647 | 2.4619 | 0.1166 | 40.8900   |
| SmallVesselStroke | family. Peptostreptococcaceae. id. 2042 | MR Egger                  | 3 | -1.1379 | 1.4071 | 0.5671 | 0.2083  | 0.2600 | 0.5700 | 9.7441 | 0.0077 | 26.2913   |
| SmallVesselStroke | family. Peptostreptococcaceae. id. 2042 | Weighted median           | 3 | -0.1635 | 0.0939 | 0.0816 | 0.2083  | 0.2600 | 0.5700 | 9.7441 | 0.0077 | 26.2913   |
| SmallVesselStroke | family. Peptostreptococcaceae. id. 2042 | Inverse variance weighted | 3 | -0.0182 | 0.1461 | 0.9010 | 0.2083  | 0.2600 | 0.5700 | 9.7441 | 0.0077 | 26.2913   |
| SmallVesselStroke | family. Peptostreptococcaceae. id. 2042 | Simple mode               | 3 | -0.1748 | 0.1060 | 0.2410 | 0.2083  | 0.2600 | 0.5700 | 9.7441 | 0.0077 | 26.2913   |
| SmallVesselStroke | family. Peptostreptococcaceae. id. 2042 | Weighted mode             | 3 | -0.1748 | 0.1094 | 0.2513 | 0.2083  | 0.2600 | 0.5700 | 9.7441 | 0.0077 | 26.2913   |
| SmallVesselStroke | family. Porphyromonadaceae. id. 943     | MR Egger                  | 3 | 0.4563  | 0.5492 | 0.5587 | -0.0910 | 0.1014 | 0.5342 | 0.8781 | 0.6447 | 105.2817  |
| SmallVesselStroke | family. Porphyromonadaceae. id. 943     | Weighted median           | 3 | -0.0628 | 0.0778 | 0.4195 | -0.0910 | 0.1014 | 0.5342 | 0.8781 | 0.6447 | 105.2817  |
| SmallVesselStroke | family. Porphyromonadaceae. id. 943     | Inverse variance weighted | 3 | -0.0336 | 0.0628 | 0.5926 | -0.0910 | 0.1014 | 0.5342 | 0.8781 | 0.6447 | 105.2817  |
| SmallVesselStroke | family. Porphyromonadaceae. id. 943     | Simple mode               | 3 | -0.0736 | 0.0920 | 0.5075 | -0.0910 | 0.1014 | 0.5342 | 0.8781 | 0.6447 | 105.2817  |
| SmallVesselStroke | family. Porphyromonadaceae. id. 943     | Weighted mode             | 3 | -0.0725 | 0.0934 | 0.5188 | -0.0910 | 0.1014 | 0.5342 | 0.8781 | 0.6447 | 105.2817  |
| SmallVesselStroke | family. Prevotellaceae. id. 960         | MR Egger                  | 3 | 0.2733  | 1.0356 | 0.8358 | -0.0382 | 0.1911 | 0.8745 | 2.8587 | 0.0909 | 44.8906   |
| SmallVesselStroke | family. Prevotellaceae. id. 960         | Weighted median           | 3 | 0.0602  | 0.0905 | 0.5054 | -0.0382 | 0.1911 | 0.8745 | 2.8587 | 0.0909 | 44.8906   |
| SmallVesselStroke | family. Prevotellaceae. id. 960         | Inverse variance weighted | 3 | 0.0677  | 0.0853 | 0.4272 | -0.0382 | 0.1911 | 0.8745 | 2.8587 | 0.0909 | 44.8906   |
| SmallVesselStroke | family. Prevotellaceae. id. 960         | Simple mode               | 3 | 0.0891  | 0.1203 | 0.5361 | -0.0382 | 0.1911 | 0.8745 | 2.8587 | 0.0909 | 44.8906   |
| SmallVesselStroke | family. Prevotellaceae. id. 960         | Weighted mode             | 3 | 0.0368  | 0.1278 | 0.8007 | -0.0382 | 0.1911 | 0.8745 | 2.8587 | 0.0909 | 44.8906   |
| SmallVesselStroke | family. Rhodospirillaceae. id. 2717     | MR Egger                  | 3 | -0.5346 | 0.7727 | 0.6147 | 0.0938  | 0.1429 | 0.6303 | 0.4101 | 0.5219 | 66.5532   |
| SmallVesselStroke | family. Rhodospirillaceae. id. 2717     | Weighted median           | 3 | -0.0404 | 0.1095 | 0.7123 | 0.0938  | 0.1429 | 0.6303 | 0.4101 | 0.5219 | 66.5532   |
| SmallVesselStroke | family. Rhodospirillaceae. id. 2717     | Inverse variance weighted | 3 | -0.0310 | 0.0889 | 0.7273 | 0.0938  | 0.1429 | 0.6303 | 0.4101 | 0.5219 | 66.5532   |
| SmallVesselStroke | family. Rhodospirillaceae. id. 2717     | Simple mode               | 3 | -0.0626 | 0.1287 | 0.6747 | 0.0938  | 0.1429 | 0.6303 | 0.4101 | 0.5219 | 66.5532   |
| SmallVesselStroke | family. Rhodospirillaceae. id. 2717     | Weighted mode             | 3 | -0.0576 | 0.1277 | 0.6962 | 0.0938  | 0.1429 | 0.6303 | 0.4101 | 0.5219 | 66.5532   |
| SmallVesselStroke | family. Rikenellaceae. id. 967          | MR Egger                  | 3 | -0.1828 | 0.5510 | 0.7960 | 0.0330  | 0.1018 | 0.8001 | 0.0194 | 0.8892 | 303.5113  |
| SmallVesselStroke | family. Rikenellaceae. id. 967          | Weighted median           | 3 | -0.0049 | 0.0749 | 0.9481 | 0.0330  | 0.1018 | 0.8001 | 0.0194 | 0.8892 | 303.5113  |
| SmallVesselStroke | family. Rikenellaceae. id. 967          | Inverse variance weighted | 3 | -0.0051 | 0.0631 | 0.9358 | 0.0330  | 0.1018 | 0.8001 | 0.0194 | 0.8892 | 303.5113  |
| SmallVesselStroke | family. Rikenellaceae. id. 967          | Simple mode               | 3 | -0.0084 | 0.0797 | 0.9255 | 0.0330  | 0.1018 | 0.8001 | 0.0194 | 0.8892 | 303.5113  |
| SmallVesselStroke | family. Rikenellaceae. id. 967          | Weighted mode             | 3 | -0.0027 | 0.0823 | 0.9767 | 0.0330  | 0.1018 | 0.8001 | 0.0194 | 0.8892 | 303.5113  |
| SmallVesselStroke | family. Ruminococcaceae. id. 2050       | MR Egger                  | 3 | 0.1051  | 0.6781 | 0.9021 | -0.0441 | 0.1252 | 0.7844 | 1.5484 | 0.2134 | 41.4707   |
| SmallVesselStroke | family. Ruminococcaceae. id. 2050       | Weighted median           | 3 | -0.1071 | 0.0872 | 0.2195 | -0.0441 | 0.1252 | 0.7844 | 1.5484 | 0.2134 | 41.4707   |
| SmallVesselStroke | family. Ruminococcaceae. id. 2050       | Inverse variance weighted | 3 | -0.1323 | 0.0623 | 0.0338 | -0.0441 | 0.1252 | 0.7844 | 1.5484 | 0.2134 | 41.4707   |
| SmallVesselStroke | family. Ruminococcaceae. id. 2050       | Simple mode               | 3 | -0.0867 | 0.0968 | 0.4651 | -0.0441 | 0.1252 | 0.7844 | 1.5484 | 0.2134 | 41.4707   |
| SmallVesselStroke | family. Ruminococcaceae. id. 2050       | Weighted mode             | 3 | -0.0855 | 0.0926 | 0.4532 | -0.0441 | 0.1252 | 0.7844 | 1.5484 | 0.2134 | 41.4707   |
| SmallVesselStroke | family. Streptococcaceae. id. 1850      | MR Egger                  | 3 | -0.2899 | 0.7033 | 0.7511 | 0.0359  | 0.1299 | 0.8283 | 1.5379 | 0.2149 | 46.6466   |
| SmallVesselStroke | family. Streptococcaceae. id. 1850      | Weighted median           | 3 | -0.1461 | 0.0833 | 0.0796 | 0.0359  | 0.1299 | 0.8283 | 1.5379 | 0.2149 | 46.6466   |
| SmallVesselStroke | family. Streptococcaceae. id. 1850      | Inverse variance weighted | 3 | -0.0968 | 0.0649 | 0.1360 | 0.0359  | 0.1299 | 0.8283 | 1.5379 | 0.2149 | 46.6466   |

|                   |                                                     |                           |   |         |        |        |         |        |        |        |        |          |
|-------------------|-----------------------------------------------------|---------------------------|---|---------|--------|--------|---------|--------|--------|--------|--------|----------|
| SmallVesselStroke | family. Streptococcaceae. id. 1850                  | Simple mode               | 3 | -0.1534 | 0.0977 | 0.2569 | 0.0359  | 0.1299 | 0.8283 | 1.5379 | 0.2149 | 46.6466  |
| SmallVesselStroke | family. Streptococcaceae. id. 1850                  | Weighted mode             | 3 | -0.1540 | 0.1084 | 0.2914 | 0.0359  | 0.1299 | 0.8283 | 1.5379 | 0.2149 | 46.6466  |
| SmallVesselStroke | family. Veillonellaceae. id. 2172                   | MR Egger                  | 3 | -0.3643 | 0.6513 | 0.6753 | 0.0674  | 0.1202 | 0.6748 | 1.2376 | 0.2659 | 76.5840  |
| SmallVesselStroke | family. Veillonellaceae. id. 2172                   | Weighted median           | 3 | -0.0433 | 0.0883 | 0.6238 | 0.0674  | 0.1202 | 0.6748 | 1.2376 | 0.2659 | 76.5840  |
| SmallVesselStroke | family. Veillonellaceae. id. 2172                   | Inverse variance weighted | 3 | -0.0017 | 0.0670 | 0.9799 | 0.0674  | 0.1202 | 0.6748 | 1.2376 | 0.2659 | 76.5840  |
| SmallVesselStroke | family. Veillonellaceae. id. 2172                   | Simple mode               | 3 | -0.0609 | 0.1053 | 0.6215 | 0.0674  | 0.1202 | 0.6748 | 1.2376 | 0.2659 | 76.5840  |
| SmallVesselStroke | family. Veillonellaceae. id. 2172                   | Weighted mode             | 3 | -0.0584 | 0.1055 | 0.6356 | 0.0674  | 0.1202 | 0.6748 | 1.2376 | 0.2659 | 76.5840  |
| SmallVesselStroke | family. Verrucomicrobiaceae. id. 4036               | MR Egger                  | 3 | 0.6910  | 0.6612 | 0.4860 | -0.1137 | 0.1221 | 0.5228 | 0.8812 | 0.6436 | 48.1310  |
| SmallVesselStroke | family. Verrucomicrobiaceae. id. 4036               | Weighted median           | 3 | 0.0523  | 0.0918 | 0.5692 | -0.1137 | 0.1221 | 0.5228 | 0.8812 | 0.6436 | 48.1310  |
| SmallVesselStroke | family. Verrucomicrobiaceae. id. 4036               | Inverse variance weighted | 3 | 0.0795  | 0.0759 | 0.2946 | -0.1137 | 0.1221 | 0.5228 | 0.8812 | 0.6436 | 48.1310  |
| SmallVesselStroke | family. Verrucomicrobiaceae. id. 4036               | Simple mode               | 3 | 0.0357  | 0.1108 | 0.7780 | -0.1137 | 0.1221 | 0.5228 | 0.8812 | 0.6436 | 48.1310  |
| SmallVesselStroke | family. Verrucomicrobiaceae. id. 4036               | Weighted mode             | 3 | 0.0330  | 0.1091 | 0.7911 | -0.1137 | 0.1221 | 0.5228 | 0.8812 | 0.6436 | 48.1310  |
| SmallVesselStroke | family. Victivallaceae. id. 2255                    | MR Egger                  | 3 | -1.3898 | 1.1993 | 0.4533 | 0.2527  | 0.2210 | 0.4575 | 1.3132 | 0.5186 | 28.9220  |
| SmallVesselStroke | family. Victivallaceae. id. 2255                    | Weighted median           | 3 | 0.0633  | 0.1661 | 0.7028 | 0.2527  | 0.2210 | 0.4575 | 1.3132 | 0.5186 | 28.9220  |
| SmallVesselStroke | family. Victivallaceae. id. 2255                    | Inverse variance weighted | 3 | -0.0273 | 0.1354 | 0.8401 | 0.2527  | 0.2210 | 0.4575 | 1.3132 | 0.5186 | 28.9220  |
| SmallVesselStroke | family. Victivallaceae. id. 2255                    | Simple mode               | 3 | 0.0742  | 0.1894 | 0.7332 | 0.2527  | 0.2210 | 0.4575 | 1.3132 | 0.5186 | 28.9220  |
| SmallVesselStroke | family. Victivallaceae. id. 2255                    | Weighted mode             | 3 | 0.0742  | 0.1954 | 0.7408 | 0.2527  | 0.2210 | 0.4575 | 1.3132 | 0.5186 | 28.9220  |
| SmallVesselStroke | family. unknownfamily. id. 1000001214               | MR Egger                  | 3 | 0.0229  | 1.0676 | 0.9864 | -0.0422 | 0.1970 | 0.8658 | 1.2571 | 0.2622 | 22.1692  |
| SmallVesselStroke | family. unknownfamily. id. 1000001214               | Weighted median           | 3 | -0.1868 | 0.1388 | 0.1784 | -0.0422 | 0.1970 | 0.8658 | 1.2571 | 0.2622 | 22.1692  |
| SmallVesselStroke | family. unknownfamily. id. 1000001214               | Inverse variance weighted | 3 | -0.2041 | 0.1083 | 0.0593 | -0.0422 | 0.1970 | 0.8658 | 1.2571 | 0.2622 | 22.1692  |
| SmallVesselStroke | family. unknownfamily. id. 1000001214               | Simple mode               | 3 | -0.1668 | 0.1678 | 0.4248 | -0.0422 | 0.1970 | 0.8658 | 1.2571 | 0.2622 | 22.1692  |
| SmallVesselStroke | family. unknownfamily. id. 1000001214               | Weighted mode             | 3 | -0.1539 | 0.1653 | 0.4501 | -0.0422 | 0.1970 | 0.8658 | 1.2571 | 0.2622 | 22.1692  |
| SmallVesselStroke | family. unknownfamily. id. 1000005471               | MR Egger                  | 3 | 1.4330  | 0.7120 | 0.2936 | -0.2587 | 0.1316 | 0.2997 | 4.4966 | 0.1056 | 24.8500  |
| SmallVesselStroke | family. unknownfamily. id. 1000005471               | Weighted median           | 3 | -0.0287 | 0.1095 | 0.7930 | -0.2587 | 0.1316 | 0.2997 | 4.4966 | 0.1056 | 24.8500  |
| SmallVesselStroke | family. unknownfamily. id. 1000005471               | Inverse variance weighted | 3 | 0.0431  | 0.1226 | 0.7250 | -0.2587 | 0.1316 | 0.2997 | 4.4966 | 0.1056 | 24.8500  |
| SmallVesselStroke | family. unknownfamily. id. 1000005471               | Simple mode               | 3 | -0.0740 | 0.1367 | 0.6425 | -0.2587 | 0.1316 | 0.2997 | 4.4966 | 0.1056 | 24.8500  |
| SmallVesselStroke | family. unknownfamily. id. 1000005471               | Weighted mode             | 3 | -0.0676 | 0.1275 | 0.6489 | -0.2587 | 0.1316 | 0.2997 | 4.4966 | 0.1056 | 24.8500  |
| SmallVesselStroke | family. unknownfamily. id. 1000006161               | MR Egger                  | 3 | -0.4732 | 1.0066 | 0.7202 | 0.0901  | 0.1859 | 0.7126 | 0.5733 | 0.4489 | 61.3416  |
| SmallVesselStroke | family. unknownfamily. id. 1000006161               | Weighted median           | 3 | -0.0313 | 0.1439 | 0.8277 | 0.0901  | 0.1859 | 0.7126 | 0.5733 | 0.4489 | 61.3416  |
| SmallVesselStroke | family. unknownfamily. id. 1000006161               | Inverse variance weighted | 3 | 0.0115  | 0.1151 | 0.9202 | 0.0901  | 0.1859 | 0.7126 | 0.5733 | 0.4489 | 61.3416  |
| SmallVesselStroke | family. unknownfamily. id. 1000006161               | Simple mode               | 3 | -0.0604 | 0.1766 | 0.7650 | 0.0901  | 0.1859 | 0.7126 | 0.5733 | 0.4489 | 61.3416  |
| SmallVesselStroke | family. unknownfamily. id. 1000006161               | Weighted mode             | 3 | -0.0581 | 0.1603 | 0.7518 | 0.0901  | 0.1859 | 0.7126 | 0.5733 | 0.4489 | 61.3416  |
| SmallVesselStroke | genus. Clostridiuminnocuumbgroup. id. 14397         | MR Egger                  | 3 | -0.2134 | 1.1457 | 0.8828 | 0.0507  | 0.2114 | 0.8501 | 0.0801 | 0.7771 | 103.7162 |
| SmallVesselStroke | genus. Clostridiuminnocuumbgroup. id. 14397         | Weighted median           | 3 | 0.0328  | 0.1510 | 0.8279 | 0.0507  | 0.2114 | 0.8501 | 0.0801 | 0.7771 | 103.7162 |
| SmallVesselStroke | genus. Clostridiuminnocuumbgroup. id. 14397         | Inverse variance weighted | 3 | 0.0598  | 0.1302 | 0.6461 | 0.0507  | 0.2114 | 0.8501 | 0.0801 | 0.7771 | 103.7162 |
| SmallVesselStroke | genus. Clostridiuminnocuumbgroup. id. 14397         | Simple mode               | 3 | 0.0235  | 0.1834 | 0.9096 | 0.0507  | 0.2114 | 0.8501 | 0.0801 | 0.7771 | 103.7162 |
| SmallVesselStroke | genus. Clostridiuminnocuumbgroup. id. 14397         | Weighted mode             | 3 | 0.0235  | 0.1668 | 0.9007 | 0.0507  | 0.2114 | 0.8501 | 0.0801 | 0.7771 | 103.7162 |
| SmallVesselStroke | genus. Eubacteriumbrachygroup. id. 11296            | MR Egger                  | 3 | -0.7722 | 1.1379 | 0.6204 | 0.1371  | 0.2103 | 0.6322 | 0.5578 | 0.4552 | 40.2524  |
| SmallVesselStroke | genus. Eubacteriumbrachygroup. id. 11296            | Weighted median           | 3 | -0.0618 | 0.1690 | 0.7147 | 0.1371  | 0.2103 | 0.6322 | 0.5578 | 0.4552 | 40.2524  |
| SmallVesselStroke | genus. Eubacteriumbrachygroup. id. 11296            | Inverse variance weighted | 3 | -0.0351 | 0.1299 | 0.7870 | 0.1371  | 0.2103 | 0.6322 | 0.5578 | 0.4552 | 40.2524  |
| SmallVesselStroke | genus. Eubacteriumbrachygroup. id. 11296            | Simple mode               | 3 | -0.1036 | 0.1987 | 0.6541 | 0.1371  | 0.2103 | 0.6322 | 0.5578 | 0.4552 | 40.2524  |
| SmallVesselStroke | genus. Eubacteriumbrachygroup. id. 11296            | Weighted mode             | 3 | -0.0957 | 0.1928 | 0.6688 | 0.1371  | 0.2103 | 0.6322 | 0.5578 | 0.4552 | 40.2524  |
| SmallVesselStroke | genus. Eubacteriumcoprostanoligenesgroup. id. 11375 | MR Egger                  | 3 | -0.2695 | 0.5561 | 0.7127 | 0.0505  | 0.1027 | 0.7091 | 0.0555 | 0.8137 | 193.7655 |
| SmallVesselStroke | genus. Eubacteriumcoprostanoligenesgroup. id. 11375 | Weighted median           | 3 | 0.0127  | 0.0773 | 0.8689 | 0.0505  | 0.1027 | 0.7091 | 0.0555 | 0.8137 | 193.7655 |
| SmallVesselStroke | genus. Eubacteriumcoprostanoligenesgroup. id. 11375 | Inverse variance weighted | 3 | 0.0021  | 0.0637 | 0.9737 | 0.0505  | 0.1027 | 0.7091 | 0.0555 | 0.8137 | 193.7655 |
| SmallVesselStroke | genus. Eubacteriumcoprostanoligenesgroup. id. 11375 | Simple mode               | 3 | 0.0234  | 0.0825 | 0.8032 | 0.0505  | 0.1027 | 0.7091 | 0.0555 | 0.8137 | 193.7655 |
| SmallVesselStroke | genus. Eubacteriumcoprostanoligenesgroup. id. 11375 | Weighted mode             | 3 | 0.0220  | 0.0799 | 0.8091 | 0.0505  | 0.1027 | 0.7091 | 0.0555 | 0.8137 | 193.7655 |
| SmallVesselStroke | genus. Eubacteriumeligensgroup. id. 14372           | MR Egger                  | 3 | -0.1470 | 0.6076 | 0.8488 | 0.0317  | 0.1122 | 0.8248 | 0.0060 | 0.9384 | 271.0634 |
| SmallVesselStroke | genus. Eubacteriumeligensgroup. id. 14372           | Weighted median           | 3 | 0.0341  | 0.0796 | 0.6684 | 0.0317  | 0.1122 | 0.8248 | 0.0060 | 0.9384 | 271.0634 |
| SmallVesselStroke | genus. Eubacteriumeligensgroup. id. 14372           | Inverse variance weighted | 3 | 0.0234  | 0.0694 | 0.7358 | 0.0317  | 0.1122 | 0.8248 | 0.0060 | 0.9384 | 271.0634 |
| SmallVesselStroke | genus. Eubacteriumeligensgroup. id. 14372           | Simple mode               | 3 | 0.0371  | 0.0945 | 0.7324 | 0.0317  | 0.1122 | 0.8248 | 0.0060 | 0.9384 | 271.0634 |
| SmallVesselStroke | genus. Eubacteriumeligensgroup. id. 14372           | Weighted mode             | 3 | 0.0370  | 0.0870 | 0.7122 | 0.0317  | 0.1122 | 0.8248 | 0.0060 | 0.9384 | 271.0634 |
| SmallVesselStroke | genus. Eubacteriumfissicatenaagroup. id. 14373      | Inverse variance weighted | 2 | 0.1025  | 0.1649 | 0.5342 | NA      | NA     | NA     | 0.3602 | 0.5484 | 30.7203  |
| SmallVesselStroke | genus. Eubacteriumhalliigroup. id. 11338            | MR Egger                  | 3 | -0.0073 | 0.5696 | 0.9918 | 0.0099  | 0.1052 | 0.9403 | 0.0272 | 0.8689 | 161.2171 |
| SmallVesselStroke | genus. Eubacteriumhalliigroup. id. 11338            | Weighted median           | 3 | 0.0406  | 0.0787 | 0.6063 | 0.0099  | 0.1052 | 0.9403 | 0.0272 | 0.8689 | 161.2171 |
| SmallVesselStroke | genus. Eubacteriumhalliigroup. id. 11338            | Inverse variance weighted | 3 | 0.0459  | 0.0653 | 0.4823 | 0.0099  | 0.1052 | 0.9403 | 0.0272 | 0.8689 | 161.2171 |
| SmallVesselStroke | genus. Eubacteriumhalliigroup. id. 11338            | Simple mode               | 3 | 0.0365  | 0.0881 | 0.7192 | 0.0099  | 0.1052 | 0.9403 | 0.0272 | 0.8689 | 161.2171 |
| SmallVesselStroke | genus. Eubacteriumhalliigroup. id. 11338            | Weighted mode             | 3 | 0.0365  | 0.0840 | 0.7066 | 0.0099  | 0.1052 | 0.9403 | 0.0272 | 0.8689 | 161.2171 |

|                   |                                                 |                           |   |         |        |        |         |        |        |        |        |          |
|-------------------|-------------------------------------------------|---------------------------|---|---------|--------|--------|---------|--------|--------|--------|--------|----------|
| SmallVesselStroke | genus..Eubacteriumnodatumgroup. id. 11297       | Inverse variance weighted | 2 | -0.0042 | 0.1707 | 0.9803 | NA      | NA     | NA     | 0.1087 | 0.7416 | 89.6700  |
| SmallVesselStroke | genus..Eubacteriumoxidoreducensgroup. id. 11339 | MR Egger                  | 3 | -0.3986 | 0.9853 | 0.7553 |         | 0.0861 | 0.1827 | 0.7198 | 0.1226 | 84.0116  |
| SmallVesselStroke | genus..Eubacteriumoxidoreducensgroup. id. 11339 | Weighted median           | 3 | 0.0383  | 0.1316 | 0.7708 |         | 0.0861 | 0.1827 | 0.7198 | 0.1226 | 84.0116  |
| SmallVesselStroke | genus..Eubacteriumoxidoreducensgroup. id. 11339 | Inverse variance weighted | 3 | 0.0623  | 0.1145 | 0.5865 |         | 0.0861 | 0.1827 | 0.7198 | 0.1226 | 84.0116  |
| SmallVesselStroke | genus..Eubacteriumoxidoreducensgroup. id. 11339 | Simple mode               | 3 | 0.0156  | 0.1582 | 0.9307 |         | 0.0861 | 0.1827 | 0.7198 | 0.1226 | 84.0116  |
| SmallVesselStroke | genus..Eubacteriumoxidoreducensgroup. id. 11339 | Weighted mode             | 3 | 0.0156  | 0.1620 | 0.9323 |         | 0.0861 | 0.1827 | 0.7198 | 0.1226 | 84.0116  |
| SmallVesselStroke | genus..Eubacteriumrectalegroup. id. 14374       | MR Egger                  | 3 | -0.3713 | 0.5581 | 0.6263 |         | 0.0499 | 0.1030 | 0.7130 | 0.0611 | 52.0915  |
| SmallVesselStroke | genus..Eubacteriumrectalegroup. id. 14374       | Weighted median           | 3 | -0.1044 | 0.0771 | 0.1757 |         | 0.0499 | 0.1030 | 0.7130 | 0.0611 | 52.0915  |
| SmallVesselStroke | genus..Eubacteriumrectalegroup. id. 14374       | Inverse variance weighted | 3 | -0.1029 | 0.0639 | 0.1070 |         | 0.0499 | 0.1030 | 0.7130 | 0.0611 | 52.0915  |
| SmallVesselStroke | genus..Eubacteriumrectalegroup. id. 14374       | Simple mode               | 3 | -0.1182 | 0.0925 | 0.3298 |         | 0.0499 | 0.1030 | 0.7130 | 0.0611 | 52.0915  |
| SmallVesselStroke | genus..Eubacteriumrectalegroup. id. 14374       | Weighted mode             | 3 | -0.1120 | 0.0869 | 0.3264 |         | 0.0499 | 0.1030 | 0.7130 | 0.0611 | 52.0915  |
| SmallVesselStroke | genus..Eubacteriumruminantiumgroup. id. 11340   | MR Egger                  | 3 | -0.6163 | 0.8535 | 0.6019 |         | 0.1214 | 0.1576 | 0.5820 | 0.3178 | 72.4055  |
| SmallVesselStroke | genus..Eubacteriumruminantiumgroup. id. 11340   | Weighted median           | 3 | 0.0097  | 0.1242 | 0.9375 |         | 0.1214 | 0.1576 | 0.5820 | 0.3178 | 72.4055  |
| SmallVesselStroke | genus..Eubacteriumruminantiumgroup. id. 11340   | Inverse variance weighted | 3 | 0.0373  | 0.0973 | 0.7015 |         | 0.1214 | 0.1576 | 0.5820 | 0.3178 | 72.4055  |
| SmallVesselStroke | genus..Eubacteriumruminantiumgroup. id. 11340   | Simple mode               | 3 | -0.0288 | 0.1497 | 0.8650 |         | 0.1214 | 0.1576 | 0.5820 | 0.3178 | 72.4055  |
| SmallVesselStroke | genus..Eubacteriumruminantiumgroup. id. 11340   | Weighted mode             | 3 | -0.0264 | 0.1411 | 0.8688 |         | 0.1214 | 0.1576 | 0.5820 | 0.3178 | 72.4055  |
| SmallVesselStroke | genus..Eubacteriumventriosumgroup. id. 11341    | MR Egger                  | 3 | -0.5882 | 0.5889 | 0.5004 |         | 0.1039 | 0.1088 | 0.5148 | 0.4369 | 71.8777  |
| SmallVesselStroke | genus..Eubacteriumventriosumgroup. id. 11341    | Weighted median           | 3 | -0.0484 | 0.0869 | 0.5776 |         | 0.1039 | 0.1088 | 0.5148 | 0.4369 | 71.8777  |
| SmallVesselStroke | genus..Eubacteriumventriosumgroup. id. 11341    | Inverse variance weighted | 3 | -0.0298 | 0.0675 | 0.6590 |         | 0.1039 | 0.1088 | 0.5148 | 0.4369 | 71.8777  |
| SmallVesselStroke | genus..Eubacteriumventriosumgroup. id. 11341    | Simple mode               | 3 | -0.0820 | 0.1021 | 0.5061 |         | 0.1039 | 0.1088 | 0.5148 | 0.4369 | 71.8777  |
| SmallVesselStroke | genus..Eubacteriumventriosumgroup. id. 11341    | Weighted mode             | 3 | -0.0799 | 0.1033 | 0.5202 |         | 0.1039 | 0.1088 | 0.5148 | 0.4369 | 71.8777  |
| SmallVesselStroke | genus..Eubacteriumxylanophilumgroup. id. 14375  | MR Egger                  | 3 | -0.0737 | 1.0451 | 0.9552 |         | 0.0123 | 0.1932 | 0.9596 | 2.8173 | 56.8219  |
| SmallVesselStroke | genus..Eubacteriumxylanophilumgroup. id. 14375  | Weighted median           | 3 | -0.0483 | 0.0952 | 0.6121 |         | 0.0123 | 0.1932 | 0.9596 | 2.8173 | 56.8219  |
| SmallVesselStroke | genus..Eubacteriumxylanophilumgroup. id. 14375  | Inverse variance weighted | 3 | -0.0078 | 0.0850 | 0.9268 |         | 0.0123 | 0.1932 | 0.9596 | 2.8173 | 56.8219  |
| SmallVesselStroke | genus..Eubacteriumxylanophilumgroup. id. 14375  | Simple mode               | 3 | -0.0793 | 0.1248 | 0.5903 |         | 0.0123 | 0.1932 | 0.9596 | 2.8173 | 56.8219  |
| SmallVesselStroke | genus..Eubacteriumxylanophilumgroup. id. 14375  | Weighted mode             | 3 | -0.0841 | 0.1234 | 0.5657 |         | 0.0123 | 0.1932 | 0.9596 | 2.8173 | 56.8219  |
| SmallVesselStroke | genus..Ruminococcusgavreauiigroup. id. 11342    | MR Egger                  | 3 | -0.3917 | 0.6321 | 0.6469 |         | 0.0681 | 0.1168 | 0.6640 | 0.1705 | 103.1841 |
| SmallVesselStroke | genus..Ruminococcusgavreauiigroup. id. 11342    | Weighted median           | 3 | -0.0206 | 0.0893 | 0.8179 |         | 0.0681 | 0.1168 | 0.6640 | 0.1705 | 103.1841 |
| SmallVesselStroke | genus..Ruminococcusgavreauiigroup. id. 11342    | Inverse variance weighted | 3 | -0.0257 | 0.0723 | 0.7228 |         | 0.0681 | 0.1168 | 0.6640 | 0.1705 | 103.1841 |
| SmallVesselStroke | genus..Ruminococcusgavreauiigroup. id. 11342    | Simple mode               | 3 | -0.0100 | 0.1050 | 0.9329 |         | 0.0681 | 0.1168 | 0.6640 | 0.1705 | 103.1841 |
| SmallVesselStroke | genus..Ruminococcusgavreauiigroup. id. 11342    | Weighted mode             | 3 | -0.0116 | 0.0975 | 0.9163 |         | 0.0681 | 0.1168 | 0.6640 | 0.1705 | 103.1841 |
| SmallVesselStroke | genus..Ruminococcusgnavusgroup. id. 14376       | MR Egger                  | 3 | 0.4097  | 0.9343 | 0.7369 | -0.0853 | 0.1723 | 0.7075 | 0.2388 | 0.6251 | 78.7689  |
| SmallVesselStroke | genus..Ruminococcusgnavusgroup. id. 14376       | Weighted median           | 3 | -0.0406 | 0.1292 | 0.7532 | -0.0853 | 0.1723 | 0.7075 | 0.2388 | 0.6251 | 78.7689  |
| SmallVesselStroke | genus..Ruminococcusgnavusgroup. id. 14376       | Inverse variance weighted | 3 | -0.0495 | 0.1063 | 0.6411 | -0.0853 | 0.1723 | 0.7075 | 0.2388 | 0.6251 | 78.7689  |
| SmallVesselStroke | genus..Ruminococcusgnavusgroup. id. 14376       | Simple mode               | 3 | -0.0193 | 0.1492 | 0.9090 | -0.0853 | 0.1723 | 0.7075 | 0.2388 | 0.6251 | 78.7689  |
| SmallVesselStroke | genus..Ruminococcusgnavusgroup. id. 14376       | Weighted mode             | 3 | -0.0262 | 0.1378 | 0.8669 | -0.0853 | 0.1723 | 0.7075 | 0.2388 | 0.6251 | 78.7689  |
| SmallVesselStroke | genus..Ruminococcustorquesgroup. id. 14377      | MR Egger                  | 3 | 0.4580  | 0.7441 | 0.6487 | -0.0887 | 0.1374 | 0.6349 | 1.8234 | 0.1769 | 71.5140  |
| SmallVesselStroke | genus..Ruminococcustorquesgroup. id. 14377      | Weighted median           | 3 | 0.0360  | 0.0849 | 0.6718 | -0.0887 | 0.1374 | 0.6349 | 1.8234 | 0.1769 | 71.5140  |
| SmallVesselStroke | genus..Ruminococcustorquesgroup. id. 14377      | Inverse variance weighted | 3 | -0.0194 | 0.0717 | 0.7868 | -0.0887 | 0.1374 | 0.6349 | 1.8234 | 0.1769 | 71.5140  |
| SmallVesselStroke | genus..Ruminococcustorquesgroup. id. 14377      | Simple mode               | 3 | 0.0575  | 0.1050 | 0.6387 | -0.0887 | 0.1374 | 0.6349 | 1.8234 | 0.1769 | 71.5140  |
| SmallVesselStroke | genus..Ruminococcustorquesgroup. id. 14377      | Weighted mode             | 3 | 0.0575  | 0.1074 | 0.6458 | -0.0887 | 0.1374 | 0.6349 | 1.8234 | 0.1769 | 71.5140  |
| SmallVesselStroke | genus.Actinomyces. id. 423                      | MR Egger                  | 3 | -0.0142 | 1.5199 | 0.9941 | 0.0075  | 0.2810 | 0.9830 | 3.4290 | 0.0641 | 34.9645  |
| SmallVesselStroke | genus.Actinomyces. id. 423                      | Weighted median           | 3 | -0.0266 | 0.1315 | 0.8396 | 0.0075  | 0.2810 | 0.9830 | 3.4290 | 0.0641 | 34.9645  |
| SmallVesselStroke | genus.Actinomyces. id. 423                      | Inverse variance weighted | 3 | 0.0262  | 0.1234 | 0.8320 | 0.0075  | 0.2810 | 0.9830 | 3.4290 | 0.0641 | 34.9645  |
| SmallVesselStroke | genus.Actinomyces. id. 423                      | Simple mode               | 3 | -0.0664 | 0.1679 | 0.7308 | 0.0075  | 0.2810 | 0.9830 | 3.4290 | 0.0641 | 34.9645  |
| SmallVesselStroke | genus.Actinomyces. id. 423                      | Weighted mode             | 3 | -0.0714 | 0.1670 | 0.7105 | 0.0075  | 0.2810 | 0.9830 | 3.4290 | 0.0641 | 34.9645  |
| SmallVesselStroke | genus.Adlercreutzia. id. 812                    | MR Egger                  | 3 | 0.0596  | 0.7816 | 0.9515 | -0.0173 | 0.1444 | 0.9241 | 0.0013 | 0.9716 | 233.4638 |
| SmallVesselStroke | genus.Adlercreutzia. id. 812                    | Weighted median           | 3 | -0.0351 | 0.1101 | 0.7498 | -0.0173 | 0.1444 | 0.9241 | 0.0013 | 0.9716 | 233.4638 |
| SmallVesselStroke | genus.Adlercreutzia. id. 812                    | Inverse variance weighted | 3 | -0.0334 | 0.0896 | 0.7096 | -0.0173 | 0.1444 | 0.9241 | 0.0013 | 0.9716 | 233.4638 |
| SmallVesselStroke | genus.Adlercreutzia. id. 812                    | Simple mode               | 3 | -0.0373 | 0.1278 | 0.7979 | -0.0173 | 0.1444 | 0.9241 | 0.0013 | 0.9716 | 233.4638 |
| SmallVesselStroke | genus.Adlercreutzia. id. 812                    | Weighted mode             | 3 | -0.0383 | 0.1210 | 0.7816 | -0.0173 | 0.1444 | 0.9241 | 0.0013 | 0.9716 | 233.4638 |
| SmallVesselStroke | genus.Akkermansia. id. 4037                     | MR Egger                  | 3 | 0.6927  | 0.6612 | 0.4852 | -0.1142 | 0.1222 | 0.5215 | 0.8884 | 0.6413 | 48.2870  |
| SmallVesselStroke | genus.Akkermansia. id. 4037                     | Weighted median           | 3 | 0.0515  | 0.0947 | 0.5863 | -0.1142 | 0.1222 | 0.5215 | 0.8884 | 0.6413 | 48.2870  |
| SmallVesselStroke | genus.Akkermansia. id. 4037                     | Inverse variance weighted | 3 | 0.0788  | 0.0759 | 0.2989 | -0.1142 | 0.1222 | 0.5215 | 0.8884 | 0.6413 | 48.2870  |
| SmallVesselStroke | genus.Akkermansia. id. 4037                     | Simple mode               | 3 | 0.0346  | 0.1169 | 0.7952 | -0.1142 | 0.1222 | 0.5215 | 0.8884 | 0.6413 | 48.2870  |
| SmallVesselStroke | genus.Akkermansia. id. 4037                     | Weighted mode             | 3 | 0.0328  | 0.1135 | 0.7999 | -0.1142 | 0.1222 | 0.5215 | 0.8884 | 0.6413 | 48.2870  |
| SmallVesselStroke | genus.Alistipes. id. 968                        | MR Egger                  | 3 | -0.1472 | 0.5523 | 0.8341 | 0.0292  | 0.1020 | 0.8227 | 0.2315 | 0.6304 | 234.5753 |
| SmallVesselStroke | genus.Alistipes. id. 968                        | Weighted median           | 3 | -0.0066 | 0.0764 | 0.9308 | 0.0292  | 0.1020 | 0.8227 | 0.2315 | 0.6304 | 234.5753 |

|                   |                                         |                           |   |         |        |        |         |        |        |        |        |          |
|-------------------|-----------------------------------------|---------------------------|---|---------|--------|--------|---------|--------|--------|--------|--------|----------|
| SmallVesselStroke | genus. Alistipes. id. 968               | Inverse variance weighted | 3 | 0.0097  | 0.0633 | 0.8784 | 0.0292  | 0.1020 | 0.8227 | 0.2315 | 0.6304 | 234.5753 |
| SmallVesselStroke | genus. Alistipes. id. 968               | Simple mode               | 3 | -0.0168 | 0.0834 | 0.8590 | 0.0292  | 0.1020 | 0.8227 | 0.2315 | 0.6304 | 234.5753 |
| SmallVesselStroke | genus. Alistipes. id. 968               | Weighted mode             | 3 | -0.0168 | 0.0905 | 0.8698 | 0.0292  | 0.1020 | 0.8227 | 0.2315 | 0.6304 | 234.5753 |
| SmallVesselStroke | genus. Anaerofilum. id. 2053            | MR Egger                  | 3 | -0.2784 | 0.9955 | 0.8264 | 0.0564  | 0.1842 | 0.8107 | 0.5709 | 0.4499 | 71.2681  |
| SmallVesselStroke | genus. Anaerofilum. id. 2053            | Weighted median           | 3 | -0.0374 | 0.1405 | 0.7902 | 0.0564  | 0.1842 | 0.8107 | 0.5709 | 0.4499 | 71.2681  |
| SmallVesselStroke | genus. Anaerofilum. id. 2053            | Inverse variance weighted | 3 | 0.0245  | 0.1146 | 0.8305 | 0.0564  | 0.1842 | 0.8107 | 0.5709 | 0.4499 | 71.2681  |
| SmallVesselStroke | genus. Anaerofilum. id. 2053            | Simple mode               | 3 | -0.0405 | 0.1558 | 0.8193 | 0.0564  | 0.1842 | 0.8107 | 0.5709 | 0.4499 | 71.2681  |
| SmallVesselStroke | genus. Anaerofilum. id. 2053            | Weighted mode             | 3 | -0.0400 | 0.1607 | 0.8266 | 0.0564  | 0.1842 | 0.8107 | 0.5709 | 0.4499 | 71.2681  |
| SmallVesselStroke | genus. Anaerostipes. id. 1991           | MR Egger                  | 3 | 0.2195  | 0.8567 | 0.8403 | -0.0313 | 0.1582 | 0.8755 | 2.2943 | 0.1298 | 59.0479  |
| SmallVesselStroke | genus. Anaerostipes. id. 1991           | Weighted median           | 3 | 0.0471  | 0.0861 | 0.5847 | -0.0313 | 0.1582 | 0.8755 | 2.2943 | 0.1298 | 59.0479  |
| SmallVesselStroke | genus. Anaerostipes. id. 1991           | Inverse variance weighted | 3 | 0.0509  | 0.0707 | 0.4713 | -0.0313 | 0.1582 | 0.8755 | 2.2943 | 0.1298 | 59.0479  |
| SmallVesselStroke | genus. Anaerostipes. id. 1991           | Simple mode               | 3 | 0.0704  | 0.1108 | 0.5900 | -0.0313 | 0.1582 | 0.8755 | 2.2943 | 0.1298 | 59.0479  |
| SmallVesselStroke | genus. Anaerostipes. id. 1991           | Weighted mode             | 3 | 0.0360  | 0.1070 | 0.7683 | -0.0313 | 0.1582 | 0.8755 | 2.2943 | 0.1298 | 59.0479  |
| SmallVesselStroke | genus. Anaerotruncus. id. 2054          | MR Egger                  | 3 | 0.3525  | 0.7980 | 0.7352 | -0.0706 | 0.1474 | 0.7158 | 1.9730 | 0.1601 | 63.4480  |
| SmallVesselStroke | genus. Anaerotruncus. id. 2054          | Weighted median           | 3 | 0.0316  | 0.0840 | 0.7069 | -0.0706 | 0.1474 | 0.7158 | 1.9730 | 0.1601 | 63.4480  |
| SmallVesselStroke | genus. Anaerotruncus. id. 2054          | Inverse variance weighted | 3 | -0.0270 | 0.0716 | 0.7064 | -0.0706 | 0.1474 | 0.7158 | 1.9730 | 0.1601 | 63.4480  |
| SmallVesselStroke | genus. Anaerotruncus. id. 2054          | Simple mode               | 3 | 0.0434  | 0.1080 | 0.7265 | -0.0706 | 0.1474 | 0.7158 | 1.9730 | 0.1601 | 63.4480  |
| SmallVesselStroke | genus. Anaerotruncus. id. 2054          | Weighted mode             | 3 | 0.0419  | 0.1058 | 0.7302 | -0.0706 | 0.1474 | 0.7158 | 1.9730 | 0.1601 | 63.4480  |
| SmallVesselStroke | genus. Bacteroides. id. 918             | MR Egger                  | 3 | -0.2051 | 0.5457 | 0.7712 | 0.0250  | 0.1007 | 0.8453 | 0.6731 | 0.4120 | 72.2139  |
| SmallVesselStroke | genus. Bacteroides. id. 918             | Weighted median           | 3 | -0.0752 | 0.0765 | 0.3253 | 0.0250  | 0.1007 | 0.8453 | 0.6731 | 0.4120 | 72.2139  |
| SmallVesselStroke | genus. Bacteroides. id. 918             | Inverse variance weighted | 3 | -0.0707 | 0.0624 | 0.2572 | 0.0250  | 0.1007 | 0.8453 | 0.6731 | 0.4120 | 72.2139  |
| SmallVesselStroke | genus. Bacteroides. id. 918             | Simple mode               | 3 | -0.0965 | 0.0911 | 0.4003 | 0.0250  | 0.1007 | 0.8453 | 0.6731 | 0.4120 | 72.2139  |
| SmallVesselStroke | genus. Bacteroides. id. 918             | Weighted mode             | 3 | -0.0918 | 0.0923 | 0.4250 | 0.0250  | 0.1007 | 0.8453 | 0.6731 | 0.4120 | 72.2139  |
| SmallVesselStroke | genus. Barnesiella. id. 944             | MR Egger                  | 3 | -0.1005 | 0.6831 | 0.9070 | 0.0442  | 0.1263 | 0.7858 | 1.2873 | 0.2565 | 39.5693  |
| SmallVesselStroke | genus. Barnesiella. id. 944             | Weighted median           | 3 | 0.1122  | 0.0952 | 0.2385 | 0.0442  | 0.1263 | 0.7858 | 1.2873 | 0.2565 | 39.5693  |
| SmallVesselStroke | genus. Barnesiella. id. 944             | Inverse variance weighted | 3 | 0.1369  | 0.0694 | 0.0485 | 0.0442  | 0.1263 | 0.7858 | 1.2873 | 0.2565 | 39.5693  |
| SmallVesselStroke | genus. Barnesiella. id. 944             | Simple mode               | 3 | 0.0901  | 0.1117 | 0.5046 | 0.0442  | 0.1263 | 0.7858 | 1.2873 | 0.2565 | 39.5693  |
| SmallVesselStroke | genus. Barnesiella. id. 944             | Weighted mode             | 3 | 0.0901  | 0.1004 | 0.4643 | 0.0442  | 0.1263 | 0.7858 | 1.2873 | 0.2565 | 39.5693  |
| SmallVesselStroke | genus. Bifidobacterium. id. 436         | MR Egger                  | 3 | -0.5853 | 0.6033 | 0.5097 | 0.1146  | 0.1114 | 0.4910 | 1.0756 | 0.5840 | 86.8294  |
| SmallVesselStroke | genus. Bifidobacterium. id. 436         | Weighted median           | 3 | 0.0791  | 0.0866 | 0.3611 | 0.1146  | 0.1114 | 0.4910 | 1.0756 | 0.5840 | 86.8294  |
| SmallVesselStroke | genus. Bifidobacterium. id. 436         | Inverse variance weighted | 3 | 0.0313  | 0.0692 | 0.6511 | 0.1146  | 0.1114 | 0.4910 | 1.0756 | 0.5840 | 86.8294  |
| SmallVesselStroke | genus. Bifidobacterium. id. 436         | Simple mode               | 3 | 0.0797  | 0.1016 | 0.5151 | 0.1146  | 0.1114 | 0.4910 | 1.0756 | 0.5840 | 86.8294  |
| SmallVesselStroke | genus. Bifidobacterium. id. 436         | Weighted mode             | 3 | 0.0800  | 0.1039 | 0.5219 | 0.1146  | 0.1114 | 0.4910 | 1.0756 | 0.5840 | 86.8294  |
| SmallVesselStroke | genus. Bilophila. id. 3170              | MR Egger                  | 3 | 0.6721  | 0.6478 | 0.4883 | -0.1359 | 0.1196 | 0.4593 | 2.1290 | 0.3449 | 51.0029  |
| SmallVesselStroke | genus. Bilophila. id. 3170              | Weighted median           | 3 | -0.0563 | 0.0982 | 0.5664 | -0.1359 | 0.1196 | 0.4593 | 2.1290 | 0.3449 | 51.0029  |
| SmallVesselStroke | genus. Bilophila. id. 3170              | Inverse variance weighted | 3 | -0.0594 | 0.0765 | 0.4379 | -0.1359 | 0.1196 | 0.4593 | 2.1290 | 0.3449 | 51.0029  |
| SmallVesselStroke | genus. Bilophila. id. 3170              | Simple mode               | 3 | -0.0645 | 0.1194 | 0.6432 | -0.1359 | 0.1196 | 0.4593 | 2.1290 | 0.3449 | 51.0029  |
| SmallVesselStroke | genus. Bilophila. id. 3170              | Weighted mode             | 3 | -0.0560 | 0.1173 | 0.6802 | -0.1359 | 0.1196 | 0.4593 | 2.1290 | 0.3449 | 51.0029  |
| SmallVesselStroke | genus. Blautia. id. 1992                | MR Egger                  | 3 | 0.1291  | 0.5874 | 0.8623 | -0.0299 | 0.1085 | 0.8289 | 1.1591 | 0.2817 | 104.1746 |
| SmallVesselStroke | genus. Blautia. id. 1992                | Weighted median           | 3 | -0.0236 | 0.0800 | 0.7676 | -0.0299 | 0.1085 | 0.8289 | 1.1591 | 0.2817 | 104.1746 |
| SmallVesselStroke | genus. Blautia. id. 1992                | Inverse variance weighted | 3 | -0.0317 | 0.0624 | 0.6118 | -0.0299 | 0.1085 | 0.8289 | 1.1591 | 0.2817 | 104.1746 |
| SmallVesselStroke | genus. Blautia. id. 1992                | Simple mode               | 3 | -0.0009 | 0.0959 | 0.9932 | -0.0299 | 0.1085 | 0.8289 | 1.1591 | 0.2817 | 104.1746 |
| SmallVesselStroke | genus. Blautia. id. 1992                | Weighted mode             | 3 | -0.0051 | 0.0954 | 0.9624 | -0.0299 | 0.1085 | 0.8289 | 1.1591 | 0.2817 | 104.1746 |
| SmallVesselStroke | genus. Butyricicoccus. id. 2055         | MR Egger                  | 3 | -0.1663 | 0.5552 | 0.8148 | 0.0281  | 0.1026 | 0.8296 | 0.0833 | 0.7729 | 226.6855 |
| SmallVesselStroke | genus. Butyricicoccus. id. 2055         | Weighted median           | 3 | -0.0193 | 0.0823 | 0.8151 | 0.0281  | 0.1026 | 0.8296 | 0.0833 | 0.7729 | 226.6855 |
| SmallVesselStroke | genus. Butyricicoccus. id. 2055         | Inverse variance weighted | 3 | -0.0150 | 0.0638 | 0.8137 | 0.0281  | 0.1026 | 0.8296 | 0.0833 | 0.7729 | 226.6855 |
| SmallVesselStroke | genus. Butyricicoccus. id. 2055         | Simple mode               | 3 | -0.0266 | 0.0901 | 0.7960 | 0.0281  | 0.1026 | 0.8296 | 0.0833 | 0.7729 | 226.6855 |
| SmallVesselStroke | genus. Butyricicoccus. id. 2055         | Weighted mode             | 3 | -0.0250 | 0.0878 | 0.8027 | 0.0281  | 0.1026 | 0.8296 | 0.0833 | 0.7729 | 226.6855 |
| SmallVesselStroke | genus. Butyricimonas. id. 945           | MR Egger                  | 3 | 0.6447  | 1.2397 | 0.6947 | -0.1078 | 0.2294 | 0.7203 | 3.2035 | 0.0735 | 31.1949  |
| SmallVesselStroke | genus. Butyricimonas. id. 945           | Weighted median           | 3 | 0.1572  | 0.1039 | 0.1303 | -0.1078 | 0.2294 | 0.7203 | 3.2035 | 0.0735 | 31.1949  |
| SmallVesselStroke | genus. Butyricimonas. id. 945           | Inverse variance weighted | 3 | 0.0659  | 0.1119 | 0.5561 | -0.1078 | 0.2294 | 0.7203 | 3.2035 | 0.0735 | 31.1949  |
| SmallVesselStroke | genus. Butyricimonas. id. 945           | Simple mode               | 3 | 0.1743  | 0.1303 | 0.3127 | -0.1078 | 0.2294 | 0.7203 | 3.2035 | 0.0735 | 31.1949  |
| SmallVesselStroke | genus. Butyricimonas. id. 945           | Weighted mode             | 3 | 0.1732  | 0.1344 | 0.3266 | -0.1078 | 0.2294 | 0.7203 | 3.2035 | 0.0735 | 31.1949  |
| SmallVesselStroke | genus. Butyrivibrio. id. 1993           | Inverse variance weighted | 2 | -0.0369 | 0.1684 | 0.8265 | NA      | NA     | NA     | 0.1041 | 0.7469 | 78.3508  |
| SmallVesselStroke | genus. CandidatusSoleaferrea. id. 11350 | MR Egger                  | 3 | 0.0190  | 1.3336 | 0.9909 | 0.0101  | 0.2465 | 0.9739 | 2.0988 | 0.1474 | 36.9956  |
| SmallVesselStroke | genus. CandidatusSoleaferrea. id. 11350 | Weighted median           | 3 | 0.0961  | 0.1391 | 0.4894 | 0.0101  | 0.2465 | 0.9739 | 2.0988 | 0.1474 | 36.9956  |
| SmallVesselStroke | genus. CandidatusSoleaferrea. id. 11350 | Inverse variance weighted | 3 | 0.0732  | 0.1080 | 0.4978 | 0.0101  | 0.2465 | 0.9739 | 2.0988 | 0.1474 | 36.9956  |
| SmallVesselStroke | genus. CandidatusSoleaferrea. id. 11350 | Simple mode               | 3 | 0.1340  | 0.1711 | 0.5155 | 0.0101  | 0.2465 | 0.9739 | 2.0988 | 0.1474 | 36.9956  |

|                   |                                            |                           |   |         |        |        |         |        |        |        |        |         |
|-------------------|--------------------------------------------|---------------------------|---|---------|--------|--------|---------|--------|--------|--------|--------|---------|
| SmallVesselStroke | genus.CandidatusSoleaeferrea.id.11350      | Weighted mode             | 3 | 0.1386  | 0.1832 | 0.5283 | 0.0101  | 0.2465 | 0.9739 | 2.0988 | 0.1474 | 36.9956 |
| SmallVesselStroke | genus.ChristensenellaceaeR.7group.id.11283 | MR Egger                  | 3 | -1.0423 | 0.5708 | 0.3189 | 0.1973  | 0.1054 | 0.3125 | 3.7953 | 0.1499 | 45.4786 |
| SmallVesselStroke | genus.ChristensenellaceaeR.7group.id.11283 | Weighted median           | 3 | 0.0393  | 0.0929 | 0.6722 | 0.1973  | 0.1054 | 0.3125 | 3.7953 | 0.1499 | 45.4786 |
| SmallVesselStroke | genus.ChristensenellaceaeR.7group.id.11283 | Inverse variance weighted | 3 | 0.0185  | 0.0901 | 0.8371 | 0.1973  | 0.1054 | 0.3125 | 3.7953 | 0.1499 | 45.4786 |
| SmallVesselStroke | genus.ChristensenellaceaeR.7group.id.11283 | Simple mode               | 3 | 0.0656  | 0.1220 | 0.6449 | 0.1973  | 0.1054 | 0.3125 | 3.7953 | 0.1499 | 45.4786 |
| SmallVesselStroke | genus.ChristensenellaceaeR.7group.id.11283 | Weighted mode             | 3 | 0.0732  | 0.1247 | 0.6163 | 0.1973  | 0.1054 | 0.3125 | 3.7953 | 0.1499 | 45.4786 |
| SmallVesselStroke | genus.Clostridiumsensustrictol.id.1873     | MR Egger                  | 3 | -0.2632 | 1.0416 | 0.8424 | 0.0268  | 0.1925 | 0.9120 | 2.8858 | 0.0894 | 33.4459 |
| SmallVesselStroke | genus.Clostridiumsensustrictol.id.1873     | Weighted median           | 3 | -0.1005 | 0.0937 | 0.2832 | 0.0268  | 0.1925 | 0.9120 | 2.8858 | 0.0894 | 33.4459 |
| SmallVesselStroke | genus.Clostridiumsensustrictol.id.1873     | Inverse variance weighted | 3 | -0.1193 | 0.0854 | 0.1622 | 0.0268  | 0.1925 | 0.9120 | 2.8858 | 0.0894 | 33.4459 |
| SmallVesselStroke | genus.Clostridiumsensustrictol.id.1873     | Simple mode               | 3 | -0.1015 | 0.1274 | 0.5091 | 0.0268  | 0.1925 | 0.9120 | 2.8858 | 0.0894 | 33.4459 |
| SmallVesselStroke | genus.Clostridiumsensustrictol.id.1873     | Weighted mode             | 3 | -0.0670 | 0.1274 | 0.6514 | 0.0268  | 0.1925 | 0.9120 | 2.8858 | 0.0894 | 33.4459 |
| SmallVesselStroke | genus.Collinsella.id.815                   | MR Egger                  | 3 | -0.4206 | 0.6057 | 0.6136 | 0.0752  | 0.1118 | 0.6233 | 0.3799 | 0.5376 | 93.1659 |
| SmallVesselStroke | genus.Collinsella.id.815                   | Weighted median           | 3 | -0.0207 | 0.0852 | 0.8084 | 0.0752  | 0.1118 | 0.6233 | 0.3799 | 0.5376 | 93.1659 |
| SmallVesselStroke | genus.Collinsella.id.815                   | Inverse variance weighted | 3 | -0.0162 | 0.0695 | 0.8155 | 0.0752  | 0.1118 | 0.6233 | 0.3799 | 0.5376 | 93.1659 |
| SmallVesselStroke | genus.Collinsella.id.815                   | Simple mode               | 3 | -0.0345 | 0.1022 | 0.7679 | 0.0752  | 0.1118 | 0.6233 | 0.3799 | 0.5376 | 93.1659 |
| SmallVesselStroke | genus.Collinsella.id.815                   | Weighted mode             | 3 | -0.0295 | 0.0955 | 0.7864 | 0.0752  | 0.1118 | 0.6233 | 0.3799 | 0.5376 | 93.1659 |
| SmallVesselStroke | genus.Copro bacter.id.949                  | MR Egger                  | 3 | 0.0098  | 1.2382 | 0.9950 | -0.0044 | 0.2289 | 0.9878 | 1.9805 | 0.1593 | 46.6502 |
| SmallVesselStroke | genus.Copro bacter.id.949                  | Weighted median           | 3 | 0.0240  | 0.1297 | 0.8534 | -0.0044 | 0.2289 | 0.9878 | 1.9805 | 0.1593 | 46.6502 |
| SmallVesselStroke | genus.Copro bacter.id.949                  | Inverse variance weighted | 3 | -0.0138 | 0.1008 | 0.8912 | -0.0044 | 0.2289 | 0.9878 | 1.9805 | 0.1593 | 46.6502 |
| SmallVesselStroke | genus.Copro bacter.id.949                  | Simple mode               | 3 | 0.0541  | 0.1787 | 0.7907 | -0.0044 | 0.2289 | 0.9878 | 1.9805 | 0.1593 | 46.6502 |
| SmallVesselStroke | genus.Copro bacter.id.949                  | Weighted mode             | 3 | 0.0605  | 0.1624 | 0.7453 | -0.0044 | 0.2289 | 0.9878 | 1.9805 | 0.1593 | 46.6502 |
| SmallVesselStroke | genus.Coprococcus1.id.11301                | MR Egger                  | 3 | -0.1825 | 0.5643 | 0.8009 | 0.0549  | 0.1042 | 0.6915 | 0.2950 | 0.8628 | 57.6095 |
| SmallVesselStroke | genus.Coprococcus1.id.11301                | Weighted median           | 3 | 0.1307  | 0.0772 | 0.0905 | 0.0549  | 0.1042 | 0.6915 | 0.2950 | 0.8628 | 57.6095 |
| SmallVesselStroke | genus.Coprococcus1.id.11301                | Inverse variance weighted | 3 | 0.1126  | 0.0647 | 0.0817 | 0.0549  | 0.1042 | 0.6915 | 0.2950 | 0.8628 | 57.6095 |
| SmallVesselStroke | genus.Coprococcus1.id.11301                | Simple mode               | 3 | 0.1366  | 0.0908 | 0.2712 | 0.0549  | 0.1042 | 0.6915 | 0.2950 | 0.8628 | 57.6095 |
| SmallVesselStroke | genus.Coprococcus1.id.11301                | Weighted mode             | 3 | 0.1361  | 0.0943 | 0.2860 | 0.0549  | 0.1042 | 0.6915 | 0.2950 | 0.8628 | 57.6095 |
| SmallVesselStroke | genus.Coprococcus2.id.11302                | MR Egger                  | 3 | -0.5067 | 0.6822 | 0.5933 | 0.0897  | 0.1261 | 0.6063 | 0.2431 | 0.6220 | 86.3686 |
| SmallVesselStroke | genus.Coprococcus2.id.11302                | Weighted median           | 3 | -0.0412 | 0.0983 | 0.6754 | 0.0897  | 0.1261 | 0.6063 | 0.2431 | 0.6220 | 86.3686 |
| SmallVesselStroke | genus.Coprococcus2.id.11302                | Inverse variance weighted | 3 | -0.0246 | 0.0782 | 0.7532 | 0.0897  | 0.1261 | 0.6063 | 0.2431 | 0.6220 | 86.3686 |
| SmallVesselStroke | genus.Coprococcus2.id.11302                | Simple mode               | 3 | -0.0697 | 0.1122 | 0.5978 | 0.0897  | 0.1261 | 0.6063 | 0.2431 | 0.6220 | 86.3686 |
| SmallVesselStroke | genus.Coprococcus2.id.11302                | Weighted mode             | 3 | -0.0678 | 0.1174 | 0.6217 | 0.0897  | 0.1261 | 0.6063 | 0.2431 | 0.6220 | 86.3686 |
| SmallVesselStroke | genus.Coprococcus3.id.11303                | MR Egger                  | 3 | 0.1017  | 0.5812 | 0.8897 | -0.0335 | 0.1074 | 0.8074 | 0.0050 | 0.9439 | 89.9791 |
| SmallVesselStroke | genus.Coprococcus3.id.11303                | Weighted median           | 3 | -0.0835 | 0.0819 | 0.3078 | -0.0335 | 0.1074 | 0.8074 | 0.0050 | 0.9439 | 89.9791 |
| SmallVesselStroke | genus.Coprococcus3.id.11303                | Inverse variance weighted | 3 | -0.0785 | 0.0666 | 0.2386 | -0.0335 | 0.1074 | 0.8074 | 0.0050 | 0.9439 | 89.9791 |
| SmallVesselStroke | genus.Coprococcus3.id.11303                | Simple mode               | 3 | -0.0881 | 0.0911 | 0.4359 | -0.0335 | 0.1074 | 0.8074 | 0.0050 | 0.9439 | 89.9791 |
| SmallVesselStroke | genus.Coprococcus3.id.11303                | Weighted mode             | 3 | -0.0894 | 0.0925 | 0.4360 | -0.0335 | 0.1074 | 0.8074 | 0.0050 | 0.9439 | 89.9791 |
| SmallVesselStroke | genus.DefluviitaleaceaeUCG011.id.11287     | MR Egger                  | 3 | -0.0078 | 0.7873 | 0.9937 | -0.0103 | 0.1456 | 0.9551 | 0.1795 | 0.6718 | 97.9696 |
| SmallVesselStroke | genus.DefluviitaleaceaeUCG011.id.11287     | Weighted median           | 3 | -0.0631 | 0.1122 | 0.5740 | -0.0103 | 0.1456 | 0.9551 | 0.1795 | 0.6718 | 97.9696 |
| SmallVesselStroke | genus.DefluviitaleaceaeUCG011.id.11287     | Inverse variance weighted | 3 | -0.0631 | 0.0903 | 0.4850 | -0.0103 | 0.1456 | 0.9551 | 0.1795 | 0.6718 | 97.9696 |
| SmallVesselStroke | genus.DefluviitaleaceaeUCG011.id.11287     | Simple mode               | 3 | -0.0603 | 0.1146 | 0.6513 | -0.0103 | 0.1456 | 0.9551 | 0.1795 | 0.6718 | 97.9696 |
| SmallVesselStroke | genus.DefluviitaleaceaeUCG011.id.11287     | Weighted mode             | 3 | -0.0655 | 0.1224 | 0.6458 | -0.0103 | 0.1456 | 0.9551 | 0.1795 | 0.6718 | 97.9696 |
| SmallVesselStroke | genus.Desulfovibrio.id.3173                | MR Egger                  | 3 | -0.2924 | 0.7521 | 0.7639 | 0.0435  | 0.1390 | 0.8069 | 0.2696 | 0.6036 | 80.6056 |
| SmallVesselStroke | genus.Desulfovibrio.id.3173                | Weighted median           | 3 | -0.0819 | 0.1059 | 0.4393 | 0.0435  | 0.1390 | 0.8069 | 0.2696 | 0.6036 | 80.6056 |
| SmallVesselStroke | genus.Desulfovibrio.id.3173                | Inverse variance weighted | 3 | -0.0585 | 0.0864 | 0.4980 | 0.0435  | 0.1390 | 0.8069 | 0.2696 | 0.6036 | 80.6056 |
| SmallVesselStroke | genus.Desulfovibrio.id.3173                | Simple mode               | 3 | -0.0978 | 0.1165 | 0.4895 | 0.0435  | 0.1390 | 0.8069 | 0.2696 | 0.6036 | 80.6056 |
| SmallVesselStroke | genus.Desulfovibrio.id.3173                | Weighted mode             | 3 | -0.0978 | 0.1186 | 0.4964 | 0.0435  | 0.1390 | 0.8069 | 0.2696 | 0.6036 | 80.6056 |
| SmallVesselStroke | genus.Dialister.id.2183                    | MR Egger                  | 3 | -0.2149 | 0.9179 | 0.8536 | 0.0191  | 0.1695 | 0.9286 | 1.8578 | 0.1729 | 38.6614 |
| SmallVesselStroke | genus.Dialister.id.2183                    | Weighted median           | 3 | -0.1524 | 0.1029 | 0.1385 | 0.0191  | 0.1695 | 0.9286 | 1.8578 | 0.1729 | 38.6614 |
| SmallVesselStroke | genus.Dialister.id.2183                    | Inverse variance weighted | 3 | -0.1122 | 0.0770 | 0.1450 | 0.0191  | 0.1695 | 0.9286 | 1.8578 | 0.1729 | 38.6614 |
| SmallVesselStroke | genus.Dialister.id.2183                    | Simple mode               | 3 | -0.1795 | 0.1113 | 0.2482 | 0.0191  | 0.1695 | 0.9286 | 1.8578 | 0.1729 | 38.6614 |
| SmallVesselStroke | genus.Dialister.id.2183                    | Weighted mode             | 3 | -0.1819 | 0.1265 | 0.2871 | 0.0191  | 0.1695 | 0.9286 | 1.8578 | 0.1729 | 38.6614 |
| SmallVesselStroke | genus.Dorea.id.1997                        | MR Egger                  | 3 | -1.0142 | 0.5534 | 0.3180 | 0.1802  | 0.1022 | 0.3284 | 3.2152 | 0.2004 | 41.0651 |
| SmallVesselStroke | genus.Dorea.id.1997                        | Weighted median           | 3 | -0.0068 | 0.0818 | 0.9333 | 0.1802  | 0.1022 | 0.3284 | 3.2152 | 0.2004 | 41.0651 |
| SmallVesselStroke | genus.Dorea.id.1997                        | Inverse variance weighted | 3 | -0.0446 | 0.0804 | 0.5792 | 0.1802  | 0.1022 | 0.3284 | 3.2152 | 0.2004 | 41.0651 |
| SmallVesselStroke | genus.Dorea.id.1997                        | Simple mode               | 3 | 0.0168  | 0.1172 | 0.8992 | 0.1802  | 0.1022 | 0.3284 | 3.2152 | 0.2004 | 41.0651 |
| SmallVesselStroke | genus.Dorea.id.1997                        | Weighted mode             | 3 | 0.0216  | 0.1067 | 0.8580 | 0.1802  | 0.1022 | 0.3284 | 3.2152 | 0.2004 | 41.0651 |
| SmallVesselStroke | genus.Eggerthella.id.819                   | MR Egger                  | 3 | -0.6479 | 1.3395 | 0.7132 | 0.0679  | 0.2472 | 0.8294 | 1.7125 | 0.1907 | 12.3482 |
| SmallVesselStroke | genus.Eggerthella.id.819                   | Weighted median           | 3 | -0.2827 | 0.1563 | 0.0706 | 0.0679  | 0.2472 | 0.8294 | 1.7125 | 0.1907 | 12.3482 |

|                   |                                             |                           |   |         |        |        |         |        |        |        |        |          |
|-------------------|---------------------------------------------|---------------------------|---|---------|--------|--------|---------|--------|--------|--------|--------|----------|
| SmallVesselStroke | genus. Eggerthella. id. 819                 | Inverse variance weighted | 3 | -0.2824 | 0.1164 | 0.0153 | 0.0679  | 0.2472 | 0.8294 | 1.7125 | 0.1907 | 12.3482  |
| SmallVesselStroke | genus. Eggerthella. id. 819                 | Simple mode               | 3 | -0.3563 | 0.1961 | 0.2109 | 0.0679  | 0.2472 | 0.8294 | 1.7125 | 0.1907 | 12.3482  |
| SmallVesselStroke | genus. Eggerthella. id. 819                 | Weighted mode             | 3 | -0.3258 | 0.1970 | 0.2400 | 0.0679  | 0.2472 | 0.8294 | 1.7125 | 0.1907 | 12.3482  |
| SmallVesselStroke | genus. Eisenbergiella. id. 11304            | MR Egger                  | 3 | 1.5674  | 1.1121 | 0.3928 | -0.2762 | 0.2051 | 0.4065 | 3.5992 | 0.1654 | 19.4867  |
| SmallVesselStroke | genus. Eisenbergiella. id. 11304            | Weighted median           | 3 | 0.1277  | 0.1545 | 0.4085 | -0.2762 | 0.2051 | 0.4065 | 3.5992 | 0.1654 | 19.4867  |
| SmallVesselStroke | genus. Eisenbergiella. id. 11304            | Inverse variance weighted | 3 | 0.0790  | 0.1495 | 0.5975 | -0.2762 | 0.2051 | 0.4065 | 3.5992 | 0.1654 | 19.4867  |
| SmallVesselStroke | genus. Eisenbergiella. id. 11304            | Simple mode               | 3 | 0.2292  | 0.2065 | 0.3827 | -0.2762 | 0.2051 | 0.4065 | 3.5992 | 0.1654 | 19.4867  |
| SmallVesselStroke | genus. Eisenbergiella. id. 11304            | Weighted mode             | 3 | 0.2237  | 0.2192 | 0.4148 | -0.2762 | 0.2051 | 0.4065 | 3.5992 | 0.1654 | 19.4867  |
| SmallVesselStroke | genus. Enterorhabdus. id. 820               | MR Egger                  | 3 | -0.2434 | 0.8196 | 0.8162 | 0.0283  | 0.1515 | 0.8822 | 0.1550 | 0.6938 | 61.3001  |
| SmallVesselStroke | genus. Enterorhabdus. id. 820               | Weighted median           | 3 | -0.1133 | 0.1146 | 0.3225 | 0.0283  | 0.1515 | 0.8822 | 0.1550 | 0.6938 | 61.3001  |
| SmallVesselStroke | genus. Enterorhabdus. id. 820               | Inverse variance weighted | 3 | -0.0910 | 0.0941 | 0.3333 | 0.0283  | 0.1515 | 0.8822 | 0.1550 | 0.6938 | 61.3001  |
| SmallVesselStroke | genus. Enterorhabdus. id. 820               | Simple mode               | 3 | -0.1193 | 0.1256 | 0.4427 | 0.0283  | 0.1515 | 0.8822 | 0.1550 | 0.6938 | 61.3001  |
| SmallVesselStroke | genus. Enterorhabdus. id. 820               | Weighted mode             | 3 | -0.1190 | 0.1160 | 0.4129 | 0.0283  | 0.1515 | 0.8822 | 0.1550 | 0.6938 | 61.3001  |
| SmallVesselStroke | genus. Erysipelatoclostridium. id. 11381    | MR Egger                  | 3 | -0.3798 | 0.7298 | 0.6945 | 0.0600  | 0.1348 | 0.7334 | 0.2024 | 0.9038 | 84.2973  |
| SmallVesselStroke | genus. Erysipelatoclostridium. id. 11381    | Weighted median           | 3 | -0.0319 | 0.0978 | 0.7440 | 0.0600  | 0.1348 | 0.7334 | 0.2024 | 0.9038 | 84.2973  |
| SmallVesselStroke | genus. Erysipelatoclostridium. id. 11381    | Inverse variance weighted | 3 | -0.0571 | 0.0837 | 0.4950 | 0.0600  | 0.1348 | 0.7334 | 0.2024 | 0.9038 | 84.2973  |
| SmallVesselStroke | genus. Erysipelatoclostridium. id. 11381    | Simple mode               | 3 | -0.0315 | 0.1070 | 0.7963 | 0.0600  | 0.1348 | 0.7334 | 0.2024 | 0.9038 | 84.2973  |
| SmallVesselStroke | genus. Erysipelatoclostridium. id. 11381    | Weighted mode             | 3 | -0.0316 | 0.1112 | 0.8027 | 0.0600  | 0.1348 | 0.7334 | 0.2024 | 0.9038 | 84.2973  |
| SmallVesselStroke | genus. ErysipelotrichaceaeUCG003. id. 11384 | MR Egger                  | 3 | 0.1870  | 1.0210 | 0.8847 | -0.0295 | 0.1886 | 0.9014 | 2.9128 | 0.0879 | 55.7021  |
| SmallVesselStroke | genus. ErysipelotrichaceaeUCG003. id. 11384 | Weighted median           | 3 | 0.0196  | 0.0916 | 0.8301 | -0.0295 | 0.1886 | 0.9014 | 2.9128 | 0.0879 | 55.7021  |
| SmallVesselStroke | genus. ErysipelotrichaceaeUCG003. id. 11384 | Inverse variance weighted | 3 | 0.0286  | 0.0837 | 0.7330 | -0.0295 | 0.1886 | 0.9014 | 2.9128 | 0.0879 | 55.7021  |
| SmallVesselStroke | genus. ErysipelotrichaceaeUCG003. id. 11384 | Simple mode               | 3 | 0.0212  | 0.1260 | 0.8819 | -0.0295 | 0.1886 | 0.9014 | 2.9128 | 0.0879 | 55.7021  |
| SmallVesselStroke | genus. ErysipelotrichaceaeUCG003. id. 11384 | Weighted mode             | 3 | -0.0072 | 0.1210 | 0.9577 | -0.0295 | 0.1886 | 0.9014 | 2.9128 | 0.0879 | 55.7021  |
| SmallVesselStroke | genus. Escherichia. Shigella. id. 3504      | MR Egger                  | 3 | 0.0568  | 0.6636 | 0.9456 | 0.0012  | 0.1227 | 0.9939 | 0.0836 | 0.7725 | 103.5732 |
| SmallVesselStroke | genus. Escherichia. Shigella. id. 3504      | Weighted median           | 3 | 0.0564  | 0.0910 | 0.5352 | 0.0012  | 0.1227 | 0.9939 | 0.0836 | 0.7725 | 103.5732 |
| SmallVesselStroke | genus. Escherichia. Shigella. id. 3504      | Inverse variance weighted | 3 | 0.0631  | 0.0764 | 0.4092 | 0.0012  | 0.1227 | 0.9939 | 0.0836 | 0.7725 | 103.5732 |
| SmallVesselStroke | genus. Escherichia. Shigella. id. 3504      | Simple mode               | 3 | 0.0512  | 0.0993 | 0.6576 | 0.0012  | 0.1227 | 0.9939 | 0.0836 | 0.7725 | 103.5732 |
| SmallVesselStroke | genus. Escherichia. Shigella. id. 3504      | Weighted mode             | 3 | 0.0499  | 0.1065 | 0.6854 | 0.0012  | 0.1227 | 0.9939 | 0.0836 | 0.7725 | 103.5732 |
| SmallVesselStroke | genus. Faecalibacterium. id. 2057           | MR Egger                  | 3 | 0.3350  | 0.7018 | 0.7165 | -0.0700 | 0.1296 | 0.6848 | 1.6403 | 0.2003 | 77.4772  |
| SmallVesselStroke | genus. Faecalibacterium. id. 2057           | Weighted median           | 3 | -0.0001 | 0.0783 | 0.9987 | -0.0700 | 0.1296 | 0.6848 | 1.6403 | 0.2003 | 77.4772  |
| SmallVesselStroke | genus. Faecalibacterium. id. 2057           | Inverse variance weighted | 3 | -0.0415 | 0.0645 | 0.5205 | -0.0700 | 0.1296 | 0.6848 | 1.6403 | 0.2003 | 77.4772  |
| SmallVesselStroke | genus. Faecalibacterium. id. 2057           | Simple mode               | 3 | 0.0273  | 0.1027 | 0.8155 | -0.0700 | 0.1296 | 0.6848 | 1.6403 | 0.2003 | 77.4772  |
| SmallVesselStroke | genus. Faecalibacterium. id. 2057           | Weighted mode             | 3 | 0.0273  | 0.1013 | 0.8131 | -0.0700 | 0.1296 | 0.6848 | 1.6403 | 0.2003 | 77.4772  |
| SmallVesselStroke | genus. FamilyXIIID3011group. id. 11293      | MR Egger                  | 3 | 0.8125  | 0.6075 | 0.4087 | -0.1470 | 0.1123 | 0.4153 | 1.9734 | 0.3728 | 53.2349  |
| SmallVesselStroke | genus. FamilyXIIID3011group. id. 11293      | Weighted median           | 3 | -0.0180 | 0.0901 | 0.8415 | -0.1470 | 0.1123 | 0.4153 | 1.9734 | 0.3728 | 53.2349  |
| SmallVesselStroke | genus. FamilyXIIID3011group. id. 11293      | Inverse variance weighted | 3 | 0.0226  | 0.0697 | 0.7460 | -0.1470 | 0.1123 | 0.4153 | 1.9734 | 0.3728 | 53.2349  |
| SmallVesselStroke | genus. FamilyXIIID3011group. id. 11293      | Simple mode               | 3 | -0.0426 | 0.1101 | 0.7362 | -0.1470 | 0.1123 | 0.4153 | 1.9734 | 0.3728 | 53.2349  |
| SmallVesselStroke | genus. FamilyXIIID3011group. id. 11293      | Weighted mode             | 3 | -0.0414 | 0.1082 | 0.7385 | -0.1470 | 0.1123 | 0.4153 | 1.9734 | 0.3728 | 53.2349  |
| SmallVesselStroke | genus. FamilyXIIIIUCG001. id. 11294         | MR Egger                  | 3 | -0.2439 | 0.6289 | 0.7645 | 0.0509  | 0.1164 | 0.7377 | 0.2055 | 0.9024 | 181.5099 |
| SmallVesselStroke | genus. FamilyXIIIIUCG001. id. 11294         | Weighted median           | 3 | 0.0465  | 0.0898 | 0.6049 | 0.0509  | 0.1164 | 0.7377 | 0.2055 | 0.9024 | 181.5099 |
| SmallVesselStroke | genus. FamilyXIIIIUCG001. id. 11294         | Inverse variance weighted | 3 | 0.0291  | 0.0725 | 0.6881 | 0.0509  | 0.1164 | 0.7377 | 0.2055 | 0.9024 | 181.5099 |
| SmallVesselStroke | genus. FamilyXIIIIUCG001. id. 11294         | Simple mode               | 3 | 0.0519  | 0.0963 | 0.6439 | 0.0509  | 0.1164 | 0.7377 | 0.2055 | 0.9024 | 181.5099 |
| SmallVesselStroke | genus. FamilyXIIIIUCG001. id. 11294         | Weighted mode             | 3 | 0.0513  | 0.0908 | 0.6287 | 0.0509  | 0.1164 | 0.7377 | 0.2055 | 0.9024 | 181.5099 |
| SmallVesselStroke | genus. Flavonifractor. id. 2059             | MR Egger                  | 3 | -0.0583 | 0.7160 | 0.9483 | 0.0115  | 0.1321 | 0.9449 | 0.8336 | 0.3612 | 100.1564 |
| SmallVesselStroke | genus. Flavonifractor. id. 2059             | Weighted median           | 3 | -0.0254 | 0.1048 | 0.8085 | 0.0115  | 0.1321 | 0.9449 | 0.8336 | 0.3612 | 100.1564 |
| SmallVesselStroke | genus. Flavonifractor. id. 2059             | Inverse variance weighted | 3 | 0.0035  | 0.0815 | 0.9662 | 0.0115  | 0.1321 | 0.9449 | 0.8336 | 0.3612 | 100.1564 |
| SmallVesselStroke | genus. Flavonifractor. id. 2059             | Simple mode               | 3 | -0.0438 | 0.1194 | 0.7487 | 0.0115  | 0.1321 | 0.9449 | 0.8336 | 0.3612 | 100.1564 |
| SmallVesselStroke | genus. Flavonifractor. id. 2059             | Weighted mode             | 3 | -0.0466 | 0.1197 | 0.7348 | 0.0115  | 0.1321 | 0.9449 | 0.8336 | 0.3612 | 100.1564 |
| SmallVesselStroke | genus. Fusicatenibacter. id. 11305          | MR Egger                  | 3 | -1.1493 | 0.5566 | 0.2871 | 0.2060  | 0.1028 | 0.2946 | 4.0483 | 0.1321 | 36.0791  |
| SmallVesselStroke | genus. Fusicatenibacter. id. 11305          | Weighted median           | 3 | 0.0158  | 0.0863 | 0.8544 | 0.2060  | 0.1028 | 0.2946 | 4.0483 | 0.1321 | 36.0791  |
| SmallVesselStroke | genus. Fusicatenibacter. id. 11305          | Inverse variance weighted | 3 | -0.0410 | 0.0907 | 0.6510 | 0.2060  | 0.1028 | 0.2946 | 4.0483 | 0.1321 | 36.0791  |
| SmallVesselStroke | genus. Fusicatenibacter. id. 11305          | Simple mode               | 3 | 0.0406  | 0.1058 | 0.7380 | 0.2060  | 0.1028 | 0.2946 | 4.0483 | 0.1321 | 36.0791  |
| SmallVesselStroke | genus. Fusicatenibacter. id. 11305          | Weighted mode             | 3 | 0.0436  | 0.1069 | 0.7231 | 0.2060  | 0.1028 | 0.2946 | 4.0483 | 0.1321 | 36.0791  |
| SmallVesselStroke | genus. Gordonibacter. id. 821               | Inverse variance weighted | 2 | -0.2068 | 0.1637 | 0.2066 | NA      | NA     | NA     | 0.1064 | 0.7443 | 18.0450  |
| SmallVesselStroke | genus. Haemophilus. id. 3698                | MR Egger                  | 3 | 0.6722  | 0.7811 | 0.5476 | -0.1175 | 0.1442 | 0.5646 | 0.4394 | 0.5074 | 52.9540  |
| SmallVesselStroke | genus. Haemophilus. id. 3698                | Weighted median           | 3 | 0.0374  | 0.1115 | 0.7372 | -0.1175 | 0.1442 | 0.5646 | 0.4394 | 0.5074 | 52.9540  |
| SmallVesselStroke | genus. Haemophilus. id. 3698                | Inverse variance weighted | 3 | 0.0397  | 0.0893 | 0.6565 | -0.1175 | 0.1442 | 0.5646 | 0.4394 | 0.5074 | 52.9540  |
| SmallVesselStroke | genus. Haemophilus. id. 3698                | Simple mode               | 3 | 0.0385  | 0.1368 | 0.8049 | -0.1175 | 0.1442 | 0.5646 | 0.4394 | 0.5074 | 52.9540  |

|                   |                             |                           |   |         |        |        |         |        |        |         |        |          |
|-------------------|-----------------------------|---------------------------|---|---------|--------|--------|---------|--------|--------|---------|--------|----------|
| SmallVesselStroke | genus.Haemophilus.id.3698   | Weighted mode             | 3 | 0.0341  | 0.1344 | 0.8234 | -0.1175 | 0.1442 | 0.5646 | 0.4394  | 0.5074 | 52.9540  |
| SmallVesselStroke | genus.Holdemanella.id.11393 | MR Egger                  | 3 | 0.5974  | 0.9054 | 0.6287 | -0.1014 | 0.1675 | 0.6535 | 1.1989  | 0.2735 | 41.9148  |
| SmallVesselStroke | genus.Holdemanella.id.11393 | Weighted median           | 3 | 0.1074  | 0.1228 | 0.3816 | -0.1014 | 0.1675 | 0.6535 | 1.1989  | 0.2735 | 41.9148  |
| SmallVesselStroke | genus.Holdemanella.id.11393 | Inverse variance weighted | 3 | 0.0531  | 0.0954 | 0.5779 | -0.1014 | 0.1675 | 0.6535 | 1.1989  | 0.2735 | 41.9148  |
| SmallVesselStroke | genus.Holdemanella.id.11393 | Simple mode               | 3 | 0.1366  | 0.1500 | 0.4587 | -0.1014 | 0.1675 | 0.6535 | 1.1989  | 0.2735 | 41.9148  |
| SmallVesselStroke | genus.Holdemanella.id.11393 | Weighted mode             | 3 | 0.1340  | 0.1482 | 0.4613 | -0.1014 | 0.1675 | 0.6535 | 1.1989  | 0.2735 | 41.9148  |
| SmallVesselStroke | genus.Holdemanella.id.11393 | MR Egger                  | 3 | 1.3950  | 0.9084 | 0.3675 | -0.2625 | 0.1678 | 0.3620 | 4.9463  | 0.0843 | 24.6344  |
| SmallVesselStroke | genus.Holdemanella.id.11393 | Weighted median           | 3 | -0.0465 | 0.1260 | 0.7121 | -0.2625 | 0.1678 | 0.3620 | 4.9463  | 0.0843 | 24.6344  |
| SmallVesselStroke | genus.Holdemanella.id.11393 | Inverse variance weighted | 3 | -0.0171 | 0.1365 | 0.9006 | -0.2625 | 0.1678 | 0.3620 | 4.9463  | 0.0843 | 24.6344  |
| SmallVesselStroke | genus.Holdemanella.id.11393 | Simple mode               | 3 | -0.0987 | 0.1681 | 0.6165 | -0.2625 | 0.1678 | 0.3620 | 4.9463  | 0.0843 | 24.6344  |
| SmallVesselStroke | genus.Holdemanella.id.11393 | Weighted mode             | 3 | -0.0867 | 0.1516 | 0.6250 | -0.2625 | 0.1678 | 0.3620 | 4.9463  | 0.0843 | 24.6344  |
| SmallVesselStroke | genus.Holdemanella.id.11393 | MR Egger                  | 3 | 0.4217  | 1.6104 | 0.8370 | -0.0852 | 0.2980 | 0.8227 | 1.8773  | 0.1706 | 31.6669  |
| SmallVesselStroke | genus.Holdemanella.id.11393 | Weighted median           | 3 | -0.0115 | 0.1791 | 0.9487 | -0.0852 | 0.2980 | 0.8227 | 1.8773  | 0.1706 | 31.6669  |
| SmallVesselStroke | genus.Holdemanella.id.11393 | Inverse variance weighted | 3 | -0.0356 | 0.1370 | 0.7948 | -0.0852 | 0.2980 | 0.8227 | 1.8773  | 0.1706 | 31.6669  |
| SmallVesselStroke | genus.Holdemanella.id.11393 | Simple mode               | 3 | 0.0538  | 0.2305 | 0.8371 | -0.0852 | 0.2980 | 0.8227 | 1.8773  | 0.1706 | 31.6669  |
| SmallVesselStroke | genus.Holdemanella.id.11393 | Weighted mode             | 3 | 0.0422  | 0.2168 | 0.8637 | -0.0852 | 0.2980 | 0.8227 | 1.8773  | 0.1706 | 31.6669  |
| SmallVesselStroke | genus.Holdemanella.id.11393 | MR Egger                  | 3 | 0.7603  | 1.1772 | 0.6349 | -0.1208 | 0.2167 | 0.6764 | 0.5141  | 0.4734 | 32.0537  |
| SmallVesselStroke | genus.Holdemanella.id.11393 | Weighted median           | 3 | 0.1711  | 0.1612 | 0.2886 | -0.1208 | 0.2167 | 0.6764 | 0.5141  | 0.4734 | 32.0537  |
| SmallVesselStroke | genus.Holdemanella.id.11393 | Inverse variance weighted | 3 | 0.1085  | 0.1317 | 0.4100 | -0.1208 | 0.2167 | 0.6764 | 0.5141  | 0.4734 | 32.0537  |
| SmallVesselStroke | genus.Holdemanella.id.11393 | Simple mode               | 3 | 0.1973  | 0.1886 | 0.4053 | -0.1208 | 0.2167 | 0.6764 | 0.5141  | 0.4734 | 32.0537  |
| SmallVesselStroke | genus.Holdemanella.id.11393 | Weighted mode             | 3 | 0.1968  | 0.1948 | 0.4187 | -0.1208 | 0.2167 | 0.6764 | 0.5141  | 0.4734 | 32.0537  |
| SmallVesselStroke | genus.Holdemanella.id.11393 | MR Egger                  | 3 | -1.5645 | 1.5091 | 0.4885 | 0.2911  | 0.2793 | 0.4868 | 11.3910 | 0.0034 | 19.7379  |
| SmallVesselStroke | genus.Holdemanella.id.11393 | Weighted median           | 3 | -0.1452 | 0.1179 | 0.2181 | 0.2911  | 0.2793 | 0.4868 | 11.3910 | 0.0034 | 19.7379  |
| SmallVesselStroke | genus.Holdemanella.id.11393 | Inverse variance weighted | 3 | -0.0020 | 0.1776 | 0.9910 | 0.2911  | 0.2793 | 0.4868 | 11.3910 | 0.0034 | 19.7379  |
| SmallVesselStroke | genus.Holdemanella.id.11393 | Simple mode               | 3 | -0.1867 | 0.1221 | 0.2659 | 0.2911  | 0.2793 | 0.4868 | 11.3910 | 0.0034 | 19.7379  |
| SmallVesselStroke | genus.Holdemanella.id.11393 | Weighted mode             | 3 | -0.1845 | 0.1216 | 0.2685 | 0.2911  | 0.2793 | 0.4868 | 11.3910 | 0.0034 | 19.7379  |
| SmallVesselStroke | genus.Holdemanella.id.11393 | MR Egger                  | 3 | -0.2171 | 0.6640 | 0.7989 | 0.0835  | 0.1227 | 0.6196 | 0.4683  | 0.7912 | 22.4250  |
| SmallVesselStroke | genus.Holdemanella.id.11393 | Weighted median           | 3 | 0.2506  | 0.0977 | 0.0103 | 0.0835  | 0.1227 | 0.6196 | 0.4683  | 0.7912 | 22.4250  |
| SmallVesselStroke | genus.Holdemanella.id.11393 | Inverse variance weighted | 3 | 0.2319  | 0.0760 | 0.0023 | 0.0835  | 0.1227 | 0.6196 | 0.4683  | 0.7912 | 22.4250  |
| SmallVesselStroke | genus.Holdemanella.id.11393 | Simple mode               | 3 | 0.2648  | 0.1164 | 0.1506 | 0.0835  | 0.1227 | 0.6196 | 0.4683  | 0.7912 | 22.4250  |
| SmallVesselStroke | genus.Holdemanella.id.11393 | Weighted mode             | 3 | 0.2655  | 0.1104 | 0.1379 | 0.0835  | 0.1227 | 0.6196 | 0.4683  | 0.7912 | 22.4250  |
| SmallVesselStroke | genus.Holdemanella.id.11393 | MR Egger                  | 3 | 1.2168  | 0.5508 | 0.2706 | -0.2202 | 0.1017 | 0.2755 | 4.7110  | 0.0948 | 34.0697  |
| SmallVesselStroke | genus.Holdemanella.id.11393 | Weighted median           | 3 | -0.0514 | 0.0857 | 0.5487 | -0.2202 | 0.1017 | 0.2755 | 4.7110  | 0.0948 | 34.0697  |
| SmallVesselStroke | genus.Holdemanella.id.11393 | Inverse variance weighted | 3 | 0.0322  | 0.0967 | 0.7390 | -0.2202 | 0.1017 | 0.2755 | 4.7110  | 0.0948 | 34.0697  |
| SmallVesselStroke | genus.Holdemanella.id.11393 | Simple mode               | 3 | -0.0589 | 0.1001 | 0.6161 | -0.2202 | 0.1017 | 0.2755 | 4.7110  | 0.0948 | 34.0697  |
| SmallVesselStroke | genus.Holdemanella.id.11393 | Weighted mode             | 3 | -0.0597 | 0.0948 | 0.5930 | -0.2202 | 0.1017 | 0.2755 | 4.7110  | 0.0948 | 34.0697  |
| SmallVesselStroke | genus.Holdemanella.id.11393 | MR Egger                  | 3 | 0.4890  | 0.5754 | 0.5516 | -0.1093 | 0.1062 | 0.4909 | 1.3965  | 0.4974 | 54.0547  |
| SmallVesselStroke | genus.Holdemanella.id.11393 | Weighted median           | 3 | -0.1119 | 0.0856 | 0.1910 | -0.1093 | 0.1062 | 0.4909 | 1.3965  | 0.4974 | 54.0547  |
| SmallVesselStroke | genus.Holdemanella.id.11393 | Inverse variance weighted | 3 | -0.0993 | 0.0658 | 0.1310 | -0.1093 | 0.1062 | 0.4909 | 1.3965  | 0.4974 | 54.0547  |
| SmallVesselStroke | genus.Holdemanella.id.11393 | Simple mode               | 3 | -0.1373 | 0.1019 | 0.3102 | -0.1093 | 0.1062 | 0.4909 | 1.3965  | 0.4974 | 54.0547  |
| SmallVesselStroke | genus.Holdemanella.id.11393 | Weighted mode             | 3 | -0.1312 | 0.1035 | 0.3325 | -0.1093 | 0.1062 | 0.4909 | 1.3965  | 0.4974 | 54.0547  |
| SmallVesselStroke | genus.Holdemanella.id.11393 | MR Egger                  | 3 | -0.0030 | 0.6102 | 0.9969 | -0.0055 | 0.1129 | 0.9692 | 0.0006  | 0.9797 | 238.1992 |
| SmallVesselStroke | genus.Holdemanella.id.11393 | Weighted median           | 3 | -0.0320 | 0.0833 | 0.7011 | -0.0055 | 0.1129 | 0.9692 | 0.0006  | 0.9797 | 238.1992 |
| SmallVesselStroke | genus.Holdemanella.id.11393 | Inverse variance weighted | 3 | -0.0324 | 0.0702 | 0.6450 | -0.0055 | 0.1129 | 0.9692 | 0.0006  | 0.9797 | 238.1992 |
| SmallVesselStroke | genus.Holdemanella.id.11393 | Simple mode               | 3 | -0.0307 | 0.0874 | 0.7592 | -0.0055 | 0.1129 | 0.9692 | 0.0006  | 0.9797 | 238.1992 |
| SmallVesselStroke | genus.Holdemanella.id.11393 | Weighted mode             | 3 | -0.0309 | 0.0875 | 0.7577 | -0.0055 | 0.1129 | 0.9692 | 0.0006  | 0.9797 | 238.1992 |
| SmallVesselStroke | genus.Holdemanella.id.11393 | MR Egger                  | 3 | 0.1676  | 0.9179 | 0.8850 | -0.0794 | 0.1701 | 0.7220 | 0.7873  | 0.3749 | 17.1602  |
| SmallVesselStroke | genus.Holdemanella.id.11393 | Weighted median           | 3 | -0.1970 | 0.1430 | 0.1685 | -0.0794 | 0.1701 | 0.7220 | 0.7873  | 0.3749 | 17.1602  |
| SmallVesselStroke | genus.Holdemanella.id.11393 | Inverse variance weighted | 3 | -0.2579 | 0.1064 | 0.0154 | -0.0794 | 0.1701 | 0.7220 | 0.7873  | 0.3749 | 17.1602  |
| SmallVesselStroke | genus.Holdemanella.id.11393 | Simple mode               | 3 | -0.1846 | 0.1672 | 0.3847 | -0.0794 | 0.1701 | 0.7220 | 0.7873  | 0.3749 | 17.1602  |
| SmallVesselStroke | genus.Holdemanella.id.11393 | Weighted mode             | 3 | -0.1846 | 0.1543 | 0.3541 | -0.0794 | 0.1701 | 0.7220 | 0.7873  | 0.3749 | 17.1602  |
| SmallVesselStroke | genus.Holdemanella.id.11393 | MR Egger                  | 3 | -0.5035 | 0.7458 | 0.6220 | 0.0842  | 0.1378 | 0.6507 | 1.5924  | 0.2070 | 54.7383  |
| SmallVesselStroke | genus.Holdemanella.id.11393 | Weighted median           | 3 | -0.0928 | 0.0908 | 0.3066 | 0.0842  | 0.1378 | 0.6507 | 1.5924  | 0.2070 | 54.7383  |
| SmallVesselStroke | genus.Holdemanella.id.11393 | Inverse variance weighted | 3 | -0.0506 | 0.0709 | 0.4751 | 0.0842  | 0.1378 | 0.6507 | 1.5924  | 0.2070 | 54.7383  |
| SmallVesselStroke | genus.Holdemanella.id.11393 | Simple mode               | 3 | -0.1261 | 0.1132 | 0.3813 | 0.0842  | 0.1378 | 0.6507 | 1.5924  | 0.2070 | 54.7383  |
| SmallVesselStroke | genus.Holdemanella.id.11393 | Weighted mode             | 3 | -0.1261 | 0.1166 | 0.3928 | 0.0842  | 0.1378 | 0.6507 | 1.5924  | 0.2070 | 54.7383  |
| SmallVesselStroke | genus.Holdemanella.id.11393 | MR Egger                  | 3 | -0.2327 | 0.7331 | 0.8043 | 0.0406  | 0.1354 | 0.8145 | 1.7202  | 0.1897 | 81.8815  |
| SmallVesselStroke | genus.Holdemanella.id.11393 | Weighted median           | 3 | -0.0251 | 0.0810 | 0.7568 | 0.0406  | 0.1354 | 0.8145 | 1.7202  | 0.1897 | 81.8815  |

|                   |                                               |                           |   |         |        |        |         |        |        |        |        |          |
|-------------------|-----------------------------------------------|---------------------------|---|---------|--------|--------|---------|--------|--------|--------|--------|----------|
| SmallVesselStroke | genus. LachnospiraceaeNK4A136group. id. 11319 | Inverse variance weighted | 3 | -0.0143 | 0.0640 | 0.8228 | 0.0406  | 0.1354 | 0.8145 | 1.7202 | 0.1897 | 81.8815  |
| SmallVesselStroke | genus. LachnospiraceaeNK4A136group. id. 11319 | Simple mode               | 3 | -0.0585 | 0.1112 | 0.6515 | 0.0406  | 0.1354 | 0.8145 | 1.7202 | 0.1897 | 81.8815  |
| SmallVesselStroke | genus. LachnospiraceaeNK4A136group. id. 11319 | Weighted mode             | 3 | -0.0519 | 0.1057 | 0.6718 | 0.0406  | 0.1354 | 0.8145 | 1.7202 | 0.1897 | 81.8815  |
| SmallVesselStroke | genus. LachnospiraceaeUCG001. id. 11321       | MR Egger                  | 3 | 0.0264  | 0.8696 | 0.9807 | 0.0063  | 0.1607 | 0.9751 | 1.4811 | 0.2236 | 57.0549  |
| SmallVesselStroke | genus. LachnospiraceaeUCG001. id. 11321       | Weighted median           | 3 | 0.0276  | 0.1033 | 0.7897 | 0.0063  | 0.1607 | 0.9751 | 1.4811 | 0.2236 | 57.0549  |
| SmallVesselStroke | genus. LachnospiraceaeUCG001. id. 11321       | Inverse variance weighted | 3 | 0.0603  | 0.0819 | 0.4618 | 0.0063  | 0.1607 | 0.9751 | 1.4811 | 0.2236 | 57.0549  |
| SmallVesselStroke | genus. LachnospiraceaeUCG001. id. 11321       | Simple mode               | 3 | 0.0050  | 0.1149 | 0.9691 | 0.0063  | 0.1607 | 0.9751 | 1.4811 | 0.2236 | 57.0549  |
| SmallVesselStroke | genus. LachnospiraceaeUCG001. id. 11321       | Weighted mode             | 3 | -0.0006 | 0.1252 | 0.9969 | 0.0063  | 0.1607 | 0.9751 | 1.4811 | 0.2236 | 57.0549  |
| SmallVesselStroke | genus. LachnospiraceaeUCG004. id. 11324       | MR Egger                  | 3 | -0.0838 | 0.6222 | 0.9147 | 0.0173  | 0.1148 | 0.9047 | 0.1248 | 0.7239 | 309.7205 |
| SmallVesselStroke | genus. LachnospiraceaeUCG004. id. 11324       | Weighted median           | 3 | 0.0017  | 0.0830 | 0.9836 | 0.0173  | 0.1148 | 0.9047 | 0.1248 | 0.7239 | 309.7205 |
| SmallVesselStroke | genus. LachnospiraceaeUCG004. id. 11324       | Inverse variance weighted | 3 | 0.0094  | 0.0708 | 0.8945 | 0.0173  | 0.1148 | 0.9047 | 0.1248 | 0.7239 | 309.7205 |
| SmallVesselStroke | genus. LachnospiraceaeUCG004. id. 11324       | Simple mode               | 3 | -0.0094 | 0.0954 | 0.9304 | 0.0173  | 0.1148 | 0.9047 | 0.1248 | 0.7239 | 309.7205 |
| SmallVesselStroke | genus. LachnospiraceaeUCG004. id. 11324       | Weighted mode             | 3 | -0.0094 | 0.0983 | 0.9324 | 0.0173  | 0.1148 | 0.9047 | 0.1248 | 0.7239 | 309.7205 |
| SmallVesselStroke | genus. LachnospiraceaeUCG008. id. 11328       | MR Egger                  | 3 | -0.6641 | 0.8397 | 0.5740 | 0.1113  | 0.1557 | 0.6050 | 0.6270 | 0.7309 | 53.0587  |
| SmallVesselStroke | genus. LachnospiraceaeUCG008. id. 11328       | Weighted median           | 3 | -0.0721 | 0.1163 | 0.5353 | 0.1113  | 0.1557 | 0.6050 | 0.6270 | 0.7309 | 53.0587  |
| SmallVesselStroke | genus. LachnospiraceaeUCG008. id. 11328       | Inverse variance weighted | 3 | -0.0681 | 0.0979 | 0.4863 | 0.1113  | 0.1557 | 0.6050 | 0.6270 | 0.7309 | 53.0587  |
| SmallVesselStroke | genus. LachnospiraceaeUCG008. id. 11328       | Simple mode               | 3 | -0.0942 | 0.1512 | 0.5969 | 0.1113  | 0.1557 | 0.6050 | 0.6270 | 0.7309 | 53.0587  |
| SmallVesselStroke | genus. LachnospiraceaeUCG008. id. 11328       | Weighted mode             | 3 | -0.0884 | 0.1476 | 0.6102 | 0.1113  | 0.1557 | 0.6050 | 0.6270 | 0.7309 | 53.0587  |
| SmallVesselStroke | genus. LachnospiraceaeUCG010. id. 11330       | MR Egger                  | 3 | 0.7968  | 0.6419 | 0.4317 | -0.1631 | 0.1185 | 0.4001 | 1.9044 | 0.3859 | 52.5450  |
| SmallVesselStroke | genus. LachnospiraceaeUCG010. id. 11330       | Weighted median           | 3 | -0.1221 | 0.0948 | 0.1979 | -0.1631 | 0.1185 | 0.4001 | 1.9044 | 0.3859 | 52.5450  |
| SmallVesselStroke | genus. LachnospiraceaeUCG010. id. 11330       | Inverse variance weighted | 3 | -0.0806 | 0.0733 | 0.2714 | -0.1631 | 0.1185 | 0.4001 | 1.9044 | 0.3859 | 52.5450  |
| SmallVesselStroke | genus. LachnospiraceaeUCG010. id. 11330       | Simple mode               | 3 | -0.1452 | 0.1219 | 0.3559 | -0.1631 | 0.1185 | 0.4001 | 1.9044 | 0.3859 | 52.5450  |
| SmallVesselStroke | genus. LachnospiraceaeUCG010. id. 11330       | Weighted mode             | 3 | -0.1474 | 0.1089 | 0.3085 | -0.1631 | 0.1185 | 0.4001 | 1.9044 | 0.3859 | 52.5450  |
| SmallVesselStroke | genus. Lactobacillus. id. 1837                | MR Egger                  | 3 | -1.2360 | 1.1343 | 0.4727 | 0.2299  | 0.2098 | 0.4710 | 3.6701 | 0.1596 | 28.3506  |
| SmallVesselStroke | genus. Lactobacillus. id. 1837                | Weighted median           | 3 | -0.0924 | 0.1392 | 0.5070 | 0.2299  | 0.2098 | 0.4710 | 3.6701 | 0.1596 | 28.3506  |
| SmallVesselStroke | genus. Lactobacillus. id. 1837                | Inverse variance weighted | 3 | -0.0015 | 0.1368 | 0.9914 | 0.2299  | 0.2098 | 0.4710 | 3.6701 | 0.1596 | 28.3506  |
| SmallVesselStroke | genus. Lactobacillus. id. 1837                | Simple mode               | 3 | -0.1447 | 0.1818 | 0.5094 | 0.2299  | 0.2098 | 0.4710 | 3.6701 | 0.1596 | 28.3506  |
| SmallVesselStroke | genus. Lactobacillus. id. 1837                | Weighted mode             | 3 | -0.1410 | 0.1717 | 0.4977 | 0.2299  | 0.2098 | 0.4710 | 3.6701 | 0.1596 | 28.3506  |
| SmallVesselStroke | genus. Lactococcus. id. 1851                  | Inverse variance weighted | 2 | 0.2147  | 0.1588 | 0.1763 | NA      | NA     | NA     | 0.1930 | 0.6604 | 16.5907  |
| SmallVesselStroke | genus. Marvinbryantia. id. 2005               | MR Egger                  | 3 | 0.9073  | 0.6486 | 0.3951 | -0.1850 | 0.1200 | 0.3665 | 2.5265 | 0.2827 | 45.1274  |
| SmallVesselStroke | genus. Marvinbryantia. id. 2005               | Weighted median           | 3 | -0.1057 | 0.1005 | 0.2931 | -0.1850 | 0.1200 | 0.3665 | 2.5265 | 0.2827 | 45.1274  |
| SmallVesselStroke | genus. Marvinbryantia. id. 2005               | Inverse variance weighted | 3 | -0.0855 | 0.0840 | 0.3082 | -0.1850 | 0.1200 | 0.3665 | 2.5265 | 0.2827 | 45.1274  |
| SmallVesselStroke | genus. Marvinbryantia. id. 2005               | Simple mode               | 3 | -0.1364 | 0.1287 | 0.4003 | -0.1850 | 0.1200 | 0.3665 | 2.5265 | 0.2827 | 45.1274  |
| SmallVesselStroke | genus. Marvinbryantia. id. 2005               | Weighted mode             | 3 | -0.1364 | 0.1261 | 0.3923 | -0.1850 | 0.1200 | 0.3665 | 2.5265 | 0.2827 | 45.1274  |
| SmallVesselStroke | genus. Methanobrevibacter. id. 123            | Inverse variance weighted | 2 | -0.0568 | 0.1674 | 0.7345 | NA      | NA     | NA     | 0.0052 | 0.9425 | 87.1447  |
| SmallVesselStroke | genus. Odoribacter. id. 952                   | MR Egger                  | 3 | 0.7028  | 0.8256 | 0.5510 | -0.1256 | 0.1526 | 0.5615 | 1.8917 | 0.1690 | 48.8270  |
| SmallVesselStroke | genus. Odoribacter. id. 952                   | Weighted median           | 3 | 0.1015  | 0.0939 | 0.2793 | -0.1256 | 0.1526 | 0.5615 | 1.8917 | 0.1690 | 48.8270  |
| SmallVesselStroke | genus. Odoribacter. id. 952                   | Inverse variance weighted | 3 | 0.0276  | 0.0867 | 0.7502 | -0.1256 | 0.1526 | 0.5615 | 1.8917 | 0.1690 | 48.8270  |
| SmallVesselStroke | genus. Odoribacter. id. 952                   | Simple mode               | 3 | 0.1198  | 0.1175 | 0.4152 | -0.1256 | 0.1526 | 0.5615 | 1.8917 | 0.1690 | 48.8270  |
| SmallVesselStroke | genus. Odoribacter. id. 952                   | Weighted mode             | 3 | 0.1192  | 0.1164 | 0.4136 | -0.1256 | 0.1526 | 0.5615 | 1.8917 | 0.1690 | 48.8270  |
| SmallVesselStroke | genus. Olsenella. id. 822                     | MR Egger                  | 3 | 0.4445  | 1.1220 | 0.7599 | -0.0501 | 0.2083 | 0.8499 | 0.0967 | 0.7559 | 27.5611  |
| SmallVesselStroke | genus. Olsenella. id. 822                     | Weighted median           | 3 | 0.2055  | 0.1601 | 0.1993 | -0.0501 | 0.2083 | 0.8499 | 0.0967 | 0.7559 | 27.5611  |
| SmallVesselStroke | genus. Olsenella. id. 822                     | Inverse variance weighted | 3 | 0.1768  | 0.1314 | 0.1786 | -0.0501 | 0.2083 | 0.8499 | 0.0967 | 0.7559 | 27.5611  |
| SmallVesselStroke | genus. Olsenella. id. 822                     | Simple mode               | 3 | 0.2151  | 0.1734 | 0.3405 | -0.0501 | 0.2083 | 0.8499 | 0.0967 | 0.7559 | 27.5611  |
| SmallVesselStroke | genus. Olsenella. id. 822                     | Weighted mode             | 3 | 0.2148  | 0.1748 | 0.3442 | -0.0501 | 0.2083 | 0.8499 | 0.0967 | 0.7559 | 27.5611  |
| SmallVesselStroke | genus. Oscillibacter. id. 2063                | MR Egger                  | 3 | -0.1471 | 0.7609 | 0.8784 | 0.0386  | 0.1406 | 0.8295 | 0.2485 | 0.6181 | 93.7712  |
| SmallVesselStroke | genus. Oscillibacter. id. 2063                | Weighted median           | 3 | 0.0347  | 0.1040 | 0.7389 | 0.0386  | 0.1406 | 0.8295 | 0.2485 | 0.6181 | 93.7712  |
| SmallVesselStroke | genus. Oscillibacter. id. 2063                | Inverse variance weighted | 3 | 0.0603  | 0.0872 | 0.4893 | 0.0386  | 0.1406 | 0.8295 | 0.2485 | 0.6181 | 93.7712  |
| SmallVesselStroke | genus. Oscillibacter. id. 2063                | Simple mode               | 3 | 0.0257  | 0.1188 | 0.8489 | 0.0386  | 0.1406 | 0.8295 | 0.2485 | 0.6181 | 93.7712  |
| SmallVesselStroke | genus. Oscillibacter. id. 2063                | Weighted mode             | 3 | 0.0261  | 0.1113 | 0.8362 | 0.0386  | 0.1406 | 0.8295 | 0.2485 | 0.6181 | 93.7712  |
| SmallVesselStroke | genus. Oscillospira. id. 2064                 | MR Egger                  | 3 | 1.0712  | 1.2918 | 0.5592 | -0.2076 | 0.2388 | 0.5443 | 5.6435 | 0.0595 | 29.8118  |
| SmallVesselStroke | genus. Oscillospira. id. 2064                 | Weighted median           | 3 | 0.0899  | 0.1172 | 0.4432 | -0.2076 | 0.2388 | 0.5443 | 5.6435 | 0.0595 | 29.8118  |
| SmallVesselStroke | genus. Oscillospira. id. 2064                 | Inverse variance weighted | 3 | -0.0448 | 0.1387 | 0.7469 | -0.2076 | 0.2388 | 0.5443 | 5.6435 | 0.0595 | 29.8118  |
| SmallVesselStroke | genus. Oscillospira. id. 2064                 | Simple mode               | 3 | 0.1009  | 0.1404 | 0.5470 | -0.2076 | 0.2388 | 0.5443 | 5.6435 | 0.0595 | 29.8118  |
| SmallVesselStroke | genus. Oscillospira. id. 2064                 | Weighted mode             | 3 | 0.1009  | 0.1442 | 0.5565 | -0.2076 | 0.2388 | 0.5443 | 5.6435 | 0.0595 | 29.8118  |
| SmallVesselStroke | genus. Oxalobacter. id. 2978                  | MR Egger                  | 3 | 0.0949  | 1.0402 | 0.9421 | -0.0115 | 0.1927 | 0.9619 | 0.0007 | 0.9783 | 206.7295 |
| SmallVesselStroke | genus. Oxalobacter. id. 2978                  | Weighted median           | 3 | 0.0332  | 0.1362 | 0.8072 | -0.0115 | 0.1927 | 0.9619 | 0.0007 | 0.9783 | 206.7295 |
| SmallVesselStroke | genus. Oxalobacter. id. 2978                  | Inverse variance weighted | 3 | 0.0330  | 0.1202 | 0.7839 | -0.0115 | 0.1927 | 0.9619 | 0.0007 | 0.9783 | 206.7295 |

|                   |                                            |                           |   |         |        |        |         |        |        |        |        |          |
|-------------------|--------------------------------------------|---------------------------|---|---------|--------|--------|---------|--------|--------|--------|--------|----------|
| SmallVesselStroke | genus. Oxalobacter. id. 2978               | Simple mode               | 3 | 0.0349  | 0.1443 | 0.8315 | -0.0115 | 0.1927 | 0.9619 | 0.0007 | 0.9783 | 206.7295 |
| SmallVesselStroke | genus. Oxalobacter. id. 2978               | Weighted mode             | 3 | 0.0341  | 0.1519 | 0.8430 | -0.0115 | 0.1927 | 0.9619 | 0.0007 | 0.9783 | 206.7295 |
| SmallVesselStroke | genus. Parabacteroides. id. 954            | MR Egger                  | 3 | 0.7250  | 0.5608 | 0.4191 | -0.1522 | 0.1035 | 0.3804 | 2.4264 | 0.2972 | 51.5878  |
| SmallVesselStroke | genus. Parabacteroides. id. 954            | Weighted median           | 3 | -0.0966 | 0.0907 | 0.2869 | -0.1522 | 0.1035 | 0.3804 | 2.4264 | 0.2972 | 51.5878  |
| SmallVesselStroke | genus. Parabacteroides. id. 954            | Inverse variance weighted | 3 | -0.0937 | 0.0707 | 0.1850 | -0.1522 | 0.1035 | 0.3804 | 2.4264 | 0.2972 | 51.5878  |
| SmallVesselStroke | genus. Parabacteroides. id. 954            | Simple mode               | 3 | -0.1143 | 0.1129 | 0.4177 | -0.1522 | 0.1035 | 0.3804 | 2.4264 | 0.2972 | 51.5878  |
| SmallVesselStroke | genus. Parabacteroides. id. 954            | Weighted mode             | 3 | -0.1189 | 0.1045 | 0.3732 | -0.1522 | 0.1035 | 0.3804 | 2.4264 | 0.2972 | 51.5878  |
| SmallVesselStroke | genus. Paraprevotella. id. 962             | MR Egger                  | 3 | -0.0781 | 0.8935 | 0.9445 | 0.0219  | 0.1649 | 0.9160 | 0.4641 | 0.4957 | 95.8120  |
| SmallVesselStroke | genus. Paraprevotella. id. 962             | Weighted median           | 3 | 0.0402  | 0.1227 | 0.7429 | 0.0219  | 0.1649 | 0.9160 | 0.4641 | 0.4957 | 95.8120  |
| SmallVesselStroke | genus. Paraprevotella. id. 962             | Inverse variance weighted | 3 | 0.0397  | 0.1021 | 0.6975 | 0.0219  | 0.1649 | 0.9160 | 0.4641 | 0.4957 | 95.8120  |
| SmallVesselStroke | genus. Paraprevotella. id. 962             | Simple mode               | 3 | 0.0307  | 0.1458 | 0.8529 | 0.0219  | 0.1649 | 0.9160 | 0.4641 | 0.4957 | 95.8120  |
| SmallVesselStroke | genus. Paraprevotella. id. 962             | Weighted mode             | 3 | 0.0508  | 0.1440 | 0.7578 | 0.0219  | 0.1649 | 0.9160 | 0.4641 | 0.4957 | 95.8120  |
| SmallVesselStroke | genus. Parasutterella. id. 2892            | MR Egger                  | 3 | -0.0597 | 0.6889 | 0.9450 | -0.0163 | 0.1271 | 0.9190 | 0.2424 | 0.6225 | 38.5685  |
| SmallVesselStroke | genus. Parasutterella. id. 2892            | Weighted median           | 3 | -0.1237 | 0.0982 | 0.2080 | -0.0163 | 0.1271 | 0.9190 | 0.2424 | 0.6225 | 38.5685  |
| SmallVesselStroke | genus. Parasutterella. id. 2892            | Inverse variance weighted | 3 | -0.1472 | 0.0786 | 0.0611 | -0.0163 | 0.1271 | 0.9190 | 0.2424 | 0.6225 | 38.5685  |
| SmallVesselStroke | genus. Parasutterella. id. 2892            | Simple mode               | 3 | -0.1202 | 0.1063 | 0.3754 | -0.0163 | 0.1271 | 0.9190 | 0.2424 | 0.6225 | 38.5685  |
| SmallVesselStroke | genus. Parasutterella. id. 2892            | Weighted mode             | 3 | -0.1196 | 0.1041 | 0.3693 | -0.0163 | 0.1271 | 0.9190 | 0.2424 | 0.6225 | 38.5685  |
| SmallVesselStroke | genus. Peptococcus. id. 2037               | MR Egger                  | 3 | 0.0022  | 0.9369 | 0.9985 | 0.0223  | 0.1735 | 0.9185 | 0.3323 | 0.5643 | 44.8049  |
| SmallVesselStroke | genus. Peptococcus. id. 2037               | Weighted median           | 3 | 0.0884  | 0.1317 | 0.5021 | 0.0223  | 0.1735 | 0.9185 | 0.3323 | 0.5643 | 44.8049  |
| SmallVesselStroke | genus. Peptococcus. id. 2037               | Inverse variance weighted | 3 | 0.1220  | 0.1082 | 0.2595 | 0.0223  | 0.1735 | 0.9185 | 0.3323 | 0.5643 | 44.8049  |
| SmallVesselStroke | genus. Peptococcus. id. 2037               | Simple mode               | 3 | 0.0787  | 0.1466 | 0.6452 | 0.0223  | 0.1735 | 0.9185 | 0.3323 | 0.5643 | 44.8049  |
| SmallVesselStroke | genus. Peptococcus. id. 2037               | Weighted mode             | 3 | 0.0781  | 0.1518 | 0.6580 | 0.0223  | 0.1735 | 0.9185 | 0.3323 | 0.5643 | 44.8049  |
| SmallVesselStroke | genus. Phascolarctobacterium. id. 2168     | MR Egger                  | 3 | 0.4756  | 0.9301 | 0.6991 | -0.1080 | 0.1716 | 0.6424 | 1.7197 | 0.1897 | 42.3500  |
| SmallVesselStroke | genus. Phascolarctobacterium. id. 2168     | Weighted median           | 3 | -0.0286 | 0.1113 | 0.7971 | -0.1080 | 0.1716 | 0.6424 | 1.7197 | 0.1897 | 42.3500  |
| SmallVesselStroke | genus. Phascolarctobacterium. id. 2168     | Inverse variance weighted | 3 | -0.1059 | 0.0885 | 0.2315 | -0.1080 | 0.1716 | 0.6424 | 1.7197 | 0.1897 | 42.3500  |
| SmallVesselStroke | genus. Phascolarctobacterium. id. 2168     | Simple mode               | 3 | -0.0112 | 0.1336 | 0.9409 | -0.1080 | 0.1716 | 0.6424 | 1.7197 | 0.1897 | 42.3500  |
| SmallVesselStroke | genus. Phascolarctobacterium. id. 2168     | Weighted mode             | 3 | -0.0112 | 0.1273 | 0.9380 | -0.1080 | 0.1716 | 0.6424 | 1.7197 | 0.1897 | 42.3500  |
| SmallVesselStroke | genus. Prevotella7. id. 11182              | Inverse variance weighted | 2 | -0.1055 | 0.1695 | 0.5336 | NA      | NA     | NA     | 0.0002 | 0.9879 | 43.4610  |
| SmallVesselStroke | genus. Prevotella9. id. 11183              | MR Egger                  | 3 | 0.3735  | 0.7604 | 0.7093 | -0.0652 | 0.1402 | 0.7227 | 0.3349 | 0.5628 | 99.4930  |
| SmallVesselStroke | genus. Prevotella9. id. 11183              | Weighted median           | 3 | 0.0586  | 0.1100 | 0.5943 | -0.0652 | 0.1402 | 0.7227 | 0.3349 | 0.5628 | 99.4930  |
| SmallVesselStroke | genus. Prevotella9. id. 11183              | Inverse variance weighted | 3 | 0.0220  | 0.0864 | 0.7994 | -0.0652 | 0.1402 | 0.7227 | 0.3349 | 0.5628 | 99.4930  |
| SmallVesselStroke | genus. Prevotella9. id. 11183              | Simple mode               | 3 | 0.0715  | 0.1268 | 0.6298 | -0.0652 | 0.1402 | 0.7227 | 0.3349 | 0.5628 | 99.4930  |
| SmallVesselStroke | genus. Prevotella9. id. 11183              | Weighted mode             | 3 | 0.0715  | 0.1260 | 0.6279 | -0.0652 | 0.1402 | 0.7227 | 0.3349 | 0.5628 | 99.4930  |
| SmallVesselStroke | genus. RikenellaceaeRC9gutgroup. id. 11191 | Inverse variance weighted | 2 | -0.4056 | 0.1739 | 0.0197 | NA      | NA     | NA     | 0.8046 | 0.3697 | 6.3459   |
| SmallVesselStroke | genus. Romboutsia. id. 11347               | MR Egger                  | 3 | -0.2414 | 0.7753 | 0.8079 | 0.0447  | 0.1433 | 0.8075 | 1.6025 | 0.2056 | 79.2534  |
| SmallVesselStroke | genus. Romboutsia. id. 11347               | Weighted median           | 3 | -0.0159 | 0.0877 | 0.8560 | 0.0447  | 0.1433 | 0.8075 | 1.6025 | 0.2056 | 79.2534  |
| SmallVesselStroke | genus. Romboutsia. id. 11347               | Inverse variance weighted | 3 | -0.0011 | 0.0703 | 0.9870 | 0.0447  | 0.1433 | 0.8075 | 1.6025 | 0.2056 | 79.2534  |
| SmallVesselStroke | genus. Romboutsia. id. 11347               | Simple mode               | 3 | -0.0494 | 0.1131 | 0.7046 | 0.0447  | 0.1433 | 0.8075 | 1.6025 | 0.2056 | 79.2534  |
| SmallVesselStroke | genus. Romboutsia. id. 11347               | Weighted mode             | 3 | -0.0439 | 0.1105 | 0.7298 | 0.0447  | 0.1433 | 0.8075 | 1.6025 | 0.2056 | 79.2534  |
| SmallVesselStroke | genus. Roseburia. id. 2012                 | MR Egger                  | 3 | 0.1399  | 0.5499 | 0.8414 | -0.0251 | 0.1016 | 0.8455 | 0.0037 | 0.9514 | 406.3023 |
| SmallVesselStroke | genus. Roseburia. id. 2012                 | Weighted median           | 3 | 0.0011  | 0.0727 | 0.9879 | -0.0251 | 0.1016 | 0.8455 | 0.0037 | 0.9514 | 406.3023 |
| SmallVesselStroke | genus. Roseburia. id. 2012                 | Inverse variance weighted | 3 | 0.0047  | 0.0630 | 0.9411 | -0.0251 | 0.1016 | 0.8455 | 0.0037 | 0.9514 | 406.3023 |
| SmallVesselStroke | genus. Roseburia. id. 2012                 | Simple mode               | 3 | -0.0020 | 0.0812 | 0.9826 | -0.0251 | 0.1016 | 0.8455 | 0.0037 | 0.9514 | 406.3023 |
| SmallVesselStroke | genus. Roseburia. id. 2012                 | Weighted mode             | 3 | -0.0035 | 0.0847 | 0.9712 | -0.0251 | 0.1016 | 0.8455 | 0.0037 | 0.9514 | 406.3023 |
| SmallVesselStroke | genus. Ruminiclostridium5. id. 11355       | MR Egger                  | 3 | 0.3439  | 0.5517 | 0.6452 | -0.0611 | 0.1019 | 0.6561 | 0.4047 | 0.5247 | 110.5346 |
| SmallVesselStroke | genus. Ruminiclostridium5. id. 11355       | Weighted median           | 3 | 0.0243  | 0.0791 | 0.7583 | -0.0611 | 0.1019 | 0.6561 | 0.4047 | 0.5247 | 110.5346 |
| SmallVesselStroke | genus. Ruminiclostridium5. id. 11355       | Inverse variance weighted | 3 | 0.0152  | 0.0633 | 0.8106 | -0.0611 | 0.1019 | 0.6561 | 0.4047 | 0.5247 | 110.5346 |
| SmallVesselStroke | genus. Ruminiclostridium5. id. 11355       | Simple mode               | 3 | 0.0403  | 0.0951 | 0.7130 | -0.0611 | 0.1019 | 0.6561 | 0.4047 | 0.5247 | 110.5346 |
| SmallVesselStroke | genus. Ruminiclostridium5. id. 11355       | Weighted mode             | 3 | 0.0369  | 0.0935 | 0.7314 | -0.0611 | 0.1019 | 0.6561 | 0.4047 | 0.5247 | 110.5346 |
| SmallVesselStroke | genus. Ruminiclostridium6. id. 11356       | MR Egger                  | 3 | -0.2997 | 0.6265 | 0.7160 | 0.0700  | 0.1158 | 0.6536 | 0.2467 | 0.6194 | 80.8757  |
| SmallVesselStroke | genus. Ruminiclostridium6. id. 11356       | Weighted median           | 3 | 0.0543  | 0.0897 | 0.5448 | 0.0700  | 0.1158 | 0.6536 | 0.2467 | 0.6194 | 80.8757  |
| SmallVesselStroke | genus. Ruminiclostridium6. id. 11356       | Inverse variance weighted | 3 | 0.0769  | 0.0718 | 0.2839 | 0.0700  | 0.1158 | 0.6536 | 0.2467 | 0.6194 | 80.8757  |
| SmallVesselStroke | genus. Ruminiclostridium6. id. 11356       | Simple mode               | 3 | 0.0357  | 0.0978 | 0.7498 | 0.0700  | 0.1158 | 0.6536 | 0.2467 | 0.6194 | 80.8757  |
| SmallVesselStroke | genus. Ruminiclostridium6. id. 11356       | Weighted mode             | 3 | 0.0357  | 0.1011 | 0.7575 | 0.0700  | 0.1158 | 0.6536 | 0.2467 | 0.6194 | 80.8757  |
| SmallVesselStroke | genus. Ruminiclostridium9. id. 11357       | MR Egger                  | 3 | -1.1150 | 0.5666 | 0.2993 | 0.1916  | 0.1046 | 0.3182 | 3.3753 | 0.1850 | 31.1157  |
| SmallVesselStroke | genus. Ruminiclostridium9. id. 11357       | Weighted median           | 3 | -0.0100 | 0.0876 | 0.9095 | 0.1916  | 0.1046 | 0.3182 | 3.3753 | 0.1850 | 31.1157  |
| SmallVesselStroke | genus. Ruminiclostridium9. id. 11357       | Inverse variance weighted | 3 | -0.0843 | 0.0843 | 0.3171 | 0.1916  | 0.1046 | 0.3182 | 3.3753 | 0.1850 | 31.1157  |
| SmallVesselStroke | genus. Ruminiclostridium9. id. 11357       | Simple mode               | 3 | -0.0043 | 0.1037 | 0.9705 | 0.1916  | 0.1046 | 0.3182 | 3.3753 | 0.1850 | 31.1157  |

|                   |                                              |                           |   |         |        |        |         |        |        |        |        |          |
|-------------------|----------------------------------------------|---------------------------|---|---------|--------|--------|---------|--------|--------|--------|--------|----------|
| SmallVesselStroke | genus.Ruminiclostridium9. id. 11357          | Weighted mode             | 3 | -0.0036 | 0.0974 | 0.9738 | 0.1916  | 0.1046 | 0.3182 | 3.3753 | 0.1850 | 31.1157  |
| SmallVesselStroke | genus.RuminococcaceaeNK4A214group. id. 11358 | MR Egger                  | 3 | -0.5685 | 0.5902 | 0.5119 | 0.1002  | 0.1090 | 0.5270 | 0.7132 | 0.3984 | 69.0898  |
| SmallVesselStroke | genus.RuminococcaceaeNK4A214group. id. 11358 | Weighted median           | 3 | -0.0649 | 0.0847 | 0.4437 | 0.1002  | 0.1090 | 0.5270 | 0.7132 | 0.3984 | 69.0898  |
| SmallVesselStroke | genus.RuminococcaceaeNK4A214group. id. 11358 | Inverse variance weighted | 3 | -0.0300 | 0.0677 | 0.6574 | 0.1002  | 0.1090 | 0.5270 | 0.7132 | 0.3984 | 69.0898  |
| SmallVesselStroke | genus.RuminococcaceaeNK4A214group. id. 11358 | Simple mode               | 3 | -0.0939 | 0.1063 | 0.4701 | 0.1002  | 0.1090 | 0.5270 | 0.7132 | 0.3984 | 69.0898  |
| SmallVesselStroke | genus.RuminococcaceaeNK4A214group. id. 11358 | Weighted mode             | 3 | -0.0931 | 0.1083 | 0.4804 | 0.1002  | 0.1090 | 0.5270 | 0.7132 | 0.3984 | 69.0898  |
| SmallVesselStroke | genus.RuminococcaceaeUCG002. id. 11360       | MR Egger                  | 3 | -0.0870 | 0.5617 | 0.9022 | 0.0167  | 0.1037 | 0.8986 | 0.0698 | 0.7916 | 388.3754 |
| SmallVesselStroke | genus.RuminococcaceaeUCG002. id. 11360       | Weighted median           | 3 | -0.0059 | 0.0758 | 0.9378 | 0.0167  | 0.1037 | 0.8986 | 0.0698 | 0.7916 | 388.3754 |
| SmallVesselStroke | genus.RuminococcaceaeUCG002. id. 11360       | Inverse variance weighted | 3 | 0.0027  | 0.0643 | 0.9670 | 0.0167  | 0.1037 | 0.8986 | 0.0698 | 0.7916 | 388.3754 |
| SmallVesselStroke | genus.RuminococcaceaeUCG002. id. 11360       | Simple mode               | 3 | -0.0112 | 0.0797 | 0.9014 | 0.0167  | 0.1037 | 0.8986 | 0.0698 | 0.7916 | 388.3754 |
| SmallVesselStroke | genus.RuminococcaceaeUCG002. id. 11360       | Weighted mode             | 3 | -0.0105 | 0.0826 | 0.9102 | 0.0167  | 0.1037 | 0.8986 | 0.0698 | 0.7916 | 388.3754 |
| SmallVesselStroke | genus.RuminococcaceaeUCG003. id. 11361       | MR Egger                  | 3 | 0.2588  | 0.6158 | 0.7467 | -0.0582 | 0.1137 | 0.6988 | 0.0682 | 0.7940 | 113.5403 |
| SmallVesselStroke | genus.RuminococcaceaeUCG003. id. 11361       | Weighted median           | 3 | -0.0651 | 0.0840 | 0.4379 | -0.0582 | 0.1137 | 0.6988 | 0.0682 | 0.7940 | 113.5403 |
| SmallVesselStroke | genus.RuminococcaceaeUCG003. id. 11361       | Inverse variance weighted | 3 | -0.0543 | 0.0704 | 0.4402 | -0.0582 | 0.1137 | 0.6988 | 0.0682 | 0.7940 | 113.5403 |
| SmallVesselStroke | genus.RuminococcaceaeUCG003. id. 11361       | Simple mode               | 3 | -0.0777 | 0.0959 | 0.5031 | -0.0582 | 0.1137 | 0.6988 | 0.0682 | 0.7940 | 113.5403 |
| SmallVesselStroke | genus.RuminococcaceaeUCG003. id. 11361       | Weighted mode             | 3 | -0.0753 | 0.0959 | 0.5146 | -0.0582 | 0.1137 | 0.6988 | 0.0682 | 0.7940 | 113.5403 |
| SmallVesselStroke | genus.RuminococcaceaeUCG004. id. 11362       | MR Egger                  | 3 | -0.9557 | 1.0671 | 0.5350 | 0.1671  | 0.1972 | 0.5524 | 2.0714 | 0.1501 | 31.7193  |
| SmallVesselStroke | genus.RuminococcaceaeUCG004. id. 11362       | Weighted median           | 3 | -0.1472 | 0.1169 | 0.2081 | 0.1671  | 0.1972 | 0.5524 | 2.0714 | 0.1501 | 31.7193  |
| SmallVesselStroke | genus.RuminococcaceaeUCG004. id. 11362       | Inverse variance weighted | 3 | -0.0572 | 0.1133 | 0.6137 | 0.1671  | 0.1972 | 0.5524 | 2.0714 | 0.1501 | 31.7193  |
| SmallVesselStroke | genus.RuminococcaceaeUCG004. id. 11362       | Simple mode               | 3 | -0.1770 | 0.1570 | 0.3766 | 0.1671  | 0.1972 | 0.5524 | 2.0714 | 0.1501 | 31.7193  |
| SmallVesselStroke | genus.RuminococcaceaeUCG004. id. 11362       | Weighted mode             | 3 | -0.1770 | 0.1487 | 0.3561 | 0.1671  | 0.1972 | 0.5524 | 2.0714 | 0.1501 | 31.7193  |
| SmallVesselStroke | genus.RuminococcaceaeUCG005. id. 11363       | MR Egger                  | 3 | -0.9800 | 0.5729 | 0.3368 | 0.1739  | 0.1058 | 0.3480 | 2.7838 | 0.2486 | 42.7137  |
| SmallVesselStroke | genus.RuminococcaceaeUCG005. id. 11363       | Weighted median           | 3 | -0.0077 | 0.0862 | 0.9291 | 0.1739  | 0.1058 | 0.3480 | 2.7838 | 0.2486 | 42.7137  |
| SmallVesselStroke | genus.RuminococcaceaeUCG005. id. 11363       | Inverse variance weighted | 3 | -0.0448 | 0.0776 | 0.5640 | 0.1739  | 0.1058 | 0.3480 | 2.7838 | 0.2486 | 42.7137  |
| SmallVesselStroke | genus.RuminococcaceaeUCG005. id. 11363       | Simple mode               | 3 | 0.0162  | 0.1170 | 0.9028 | 0.1739  | 0.1058 | 0.3480 | 2.7838 | 0.2486 | 42.7137  |
| SmallVesselStroke | genus.RuminococcaceaeUCG005. id. 11363       | Weighted mode             | 3 | 0.0208  | 0.1015 | 0.8568 | 0.1739  | 0.1058 | 0.3480 | 2.7838 | 0.2486 | 42.7137  |
| SmallVesselStroke | genus.RuminococcaceaeUCG009. id. 11366       | MR Egger                  | 3 | -0.9086 | 0.8300 | 0.4713 | 0.1477  | 0.1535 | 0.5123 | 0.9977 | 0.6072 | 31.7312  |
| SmallVesselStroke | genus.RuminococcaceaeUCG009. id. 11366       | Weighted median           | 3 | -0.0949 | 0.1231 | 0.4405 | 0.1477  | 0.1535 | 0.5123 | 0.9977 | 0.6072 | 31.7312  |
| SmallVesselStroke | genus.RuminococcaceaeUCG009. id. 11366       | Inverse variance weighted | 3 | -0.1153 | 0.0956 | 0.2276 | 0.1477  | 0.1535 | 0.5123 | 0.9977 | 0.6072 | 31.7312  |
| SmallVesselStroke | genus.RuminococcaceaeUCG009. id. 11366       | Simple mode               | 3 | -0.0795 | 0.1401 | 0.6279 | 0.1477  | 0.1535 | 0.5123 | 0.9977 | 0.6072 | 31.7312  |
| SmallVesselStroke | genus.RuminococcaceaeUCG009. id. 11366       | Weighted mode             | 3 | -0.0679 | 0.1403 | 0.6761 | 0.1477  | 0.1535 | 0.5123 | 0.9977 | 0.6072 | 31.7312  |
| SmallVesselStroke | genus.RuminococcaceaeUCG010. id. 11367       | MR Egger                  | 3 | 0.5656  | 0.6379 | 0.5382 | -0.1134 | 0.1179 | 0.5124 | 0.9458 | 0.6232 | 84.1282  |
| SmallVesselStroke | genus.RuminococcaceaeUCG010. id. 11367       | Weighted median           | 3 | -0.0915 | 0.0947 | 0.3339 | -0.1134 | 0.1179 | 0.5124 | 0.9458 | 0.6232 | 84.1282  |
| SmallVesselStroke | genus.RuminococcaceaeUCG010. id. 11367       | Inverse variance weighted | 3 | -0.0440 | 0.0732 | 0.5483 | -0.1134 | 0.1179 | 0.5124 | 0.9458 | 0.6232 | 84.1282  |
| SmallVesselStroke | genus.RuminococcaceaeUCG010. id. 11367       | Simple mode               | 3 | -0.0924 | 0.1043 | 0.4693 | -0.1134 | 0.1179 | 0.5124 | 0.9458 | 0.6232 | 84.1282  |
| SmallVesselStroke | genus.RuminococcaceaeUCG010. id. 11367       | Weighted mode             | 3 | -0.0924 | 0.1117 | 0.4952 | -0.1134 | 0.1179 | 0.5124 | 0.9458 | 0.6232 | 84.1282  |
| SmallVesselStroke | genus.RuminococcaceaeUCG011. id. 11368       | MR Egger                  | 3 | 0.9816  | 1.7518 | 0.6748 | -0.1834 | 0.3253 | 0.6731 | 2.4545 | 0.1172 | 20.7032  |
| SmallVesselStroke | genus.RuminococcaceaeUCG011. id. 11368       | Weighted median           | 3 | 0.1222  | 0.1738 | 0.4819 | -0.1834 | 0.3253 | 0.6731 | 2.4545 | 0.1172 | 20.7032  |
| SmallVesselStroke | genus.RuminococcaceaeUCG011. id. 11368       | Inverse variance weighted | 3 | 0.0005  | 0.1665 | 0.9974 | -0.1834 | 0.3253 | 0.6731 | 2.4545 | 0.1172 | 20.7032  |
| SmallVesselStroke | genus.RuminococcaceaeUCG011. id. 11368       | Simple mode               | 3 | 0.1589  | 0.2257 | 0.5542 | -0.1834 | 0.3253 | 0.6731 | 2.4545 | 0.1172 | 20.7032  |
| SmallVesselStroke | genus.RuminococcaceaeUCG011. id. 11368       | Weighted mode             | 3 | 0.1568  | 0.2190 | 0.5483 | -0.1834 | 0.3253 | 0.6731 | 2.4545 | 0.1172 | 20.7032  |
| SmallVesselStroke | genus.RuminococcaceaeUCG013. id. 11370       | MR Egger                  | 3 | 0.6283  | 0.7384 | 0.5512 | -0.1176 | 0.1365 | 0.5472 | 1.7347 | 0.1878 | 60.3938  |
| SmallVesselStroke | genus.RuminococcaceaeUCG013. id. 11370       | Weighted median           | 3 | 0.0657  | 0.0888 | 0.4597 | -0.1176 | 0.1365 | 0.5472 | 1.7347 | 0.1878 | 60.3938  |
| SmallVesselStroke | genus.RuminococcaceaeUCG013. id. 11370       | Inverse variance weighted | 3 | -0.0038 | 0.0791 | 0.9621 | -0.1176 | 0.1365 | 0.5472 | 1.7347 | 0.1878 | 60.3938  |
| SmallVesselStroke | genus.RuminococcaceaeUCG013. id. 11370       | Simple mode               | 3 | 0.0812  | 0.1073 | 0.5282 | -0.1176 | 0.1365 | 0.5472 | 1.7347 | 0.1878 | 60.3938  |
| SmallVesselStroke | genus.RuminococcaceaeUCG013. id. 11370       | Weighted mode             | 3 | 0.0812  | 0.1124 | 0.5450 | -0.1176 | 0.1365 | 0.5472 | 1.7347 | 0.1878 | 60.3938  |
| SmallVesselStroke | genus.RuminococcaceaeUCG014. id. 11371       | MR Egger                  | 3 | 0.0027  | 0.6035 | 0.9972 | -0.0001 | 0.1115 | 0.9995 | 0.0289 | 0.8649 | 730.4811 |
| SmallVesselStroke | genus.RuminococcaceaeUCG014. id. 11371       | Weighted median           | 3 | 0.0053  | 0.0813 | 0.9483 | -0.0001 | 0.1115 | 0.9995 | 0.0289 | 0.8649 | 730.4811 |
| SmallVesselStroke | genus.RuminococcaceaeUCG014. id. 11371       | Inverse variance weighted | 3 | 0.0022  | 0.0693 | 0.9742 | -0.0001 | 0.1115 | 0.9995 | 0.0289 | 0.8649 | 730.4811 |
| SmallVesselStroke | genus.RuminococcaceaeUCG014. id. 11371       | Simple mode               | 3 | 0.0078  | 0.0933 | 0.9411 | -0.0001 | 0.1115 | 0.9995 | 0.0289 | 0.8649 | 730.4811 |
| SmallVesselStroke | genus.RuminococcaceaeUCG014. id. 11371       | Weighted mode             | 3 | 0.0085  | 0.0883 | 0.9321 | -0.0001 | 0.1115 | 0.9995 | 0.0289 | 0.8649 | 730.4811 |
| SmallVesselStroke | genus.Ruminococcus1. id. 11373               | MR Egger                  | 3 | 0.0467  | 0.5691 | 0.9478 | -0.0324 | 0.1051 | 0.8096 | 0.2705 | 0.6030 | 48.3113  |
| SmallVesselStroke | genus.Ruminococcus1. id. 11373               | Weighted median           | 3 | -0.1074 | 0.0824 | 0.1924 | -0.0324 | 0.1051 | 0.8096 | 0.2705 | 0.6030 | 48.3113  |
| SmallVesselStroke | genus.Ruminococcus1. id. 11373               | Inverse variance weighted | 3 | -0.1276 | 0.0652 | 0.0502 | -0.0324 | 0.1051 | 0.8096 | 0.2705 | 0.6030 | 48.3113  |
| SmallVesselStroke | genus.Ruminococcus1. id. 11373               | Simple mode               | 3 | -0.0980 | 0.0927 | 0.4011 | -0.0324 | 0.1051 | 0.8096 | 0.2705 | 0.6030 | 48.3113  |
| SmallVesselStroke | genus.Ruminococcus1. id. 11373               | Weighted mode             | 3 | -0.0980 | 0.0899 | 0.3892 | -0.0324 | 0.1051 | 0.8096 | 0.2705 | 0.6030 | 48.3113  |
| SmallVesselStroke | genus.Ruminococcus2. id. 11374               | MR Egger                  | 3 | -0.2411 | 1.1685 | 0.8705 | 0.0239  | 0.2159 | 0.9297 | 3.9361 | 0.0473 | 32.9634  |
| SmallVesselStroke | genus.Ruminococcus2. id. 11374               | Weighted median           | 3 | -0.1611 | 0.0988 | 0.1030 | 0.0239  | 0.2159 | 0.9297 | 3.9361 | 0.0473 | 32.9634  |

|                   |                                     |                           |   |         |        |        |         |        |        |        |        |         |
|-------------------|-------------------------------------|---------------------------|---|---------|--------|--------|---------|--------|--------|--------|--------|---------|
| SmallVesselStroke | genus. Ruminococcus2. id. 11374     | Inverse variance weighted | 3 | -0.1125 | 0.0953 | 0.2381 | 0.0239  | 0.2159 | 0.9297 | 3.9361 | 0.0473 | 32.9634 |
| SmallVesselStroke | genus. Ruminococcus2. id. 11374     | Simple mode               | 3 | -0.1987 | 0.1175 | 0.2330 | 0.0239  | 0.2159 | 0.9297 | 3.9361 | 0.0473 | 32.9634 |
| SmallVesselStroke | genus. Ruminococcus2. id. 11374     | Weighted mode             | 3 | -0.2003 | 0.1252 | 0.2508 | 0.0239  | 0.2159 | 0.9297 | 3.9361 | 0.0473 | 32.9634 |
| SmallVesselStroke | genus. Sellimonas. id. 14369        | Inverse variance weighted | 2 | 0.0356  | 0.3382 | 0.9161 | NA      | NA     | NA     | 3.7436 | 0.0530 | 8.9981  |
| SmallVesselStroke | genus. Senegalimassilia. id. 11160  | MR Egger                  | 3 | 0.3527  | 1.1020 | 0.8028 | -0.0678 | 0.2042 | 0.7960 | 1.7079 | 0.1913 | 50.5018 |
| SmallVesselStroke | genus. Senegalimassilia. id. 11160  | Weighted median           | 3 | 0.0123  | 0.1239 | 0.9208 | -0.0678 | 0.2042 | 0.7960 | 1.7079 | 0.1913 | 50.5018 |
| SmallVesselStroke | genus. Senegalimassilia. id. 11160  | Inverse variance weighted | 3 | -0.0105 | 0.0981 | 0.9149 | -0.0678 | 0.2042 | 0.7960 | 1.7079 | 0.1913 | 50.5018 |
| SmallVesselStroke | genus. Senegalimassilia. id. 11160  | Simple mode               | 3 | 0.0601  | 0.1576 | 0.7395 | -0.0678 | 0.2042 | 0.7960 | 1.7079 | 0.1913 | 50.5018 |
| SmallVesselStroke | genus. Senegalimassilia. id. 11160  | Weighted mode             | 3 | 0.0520  | 0.1504 | 0.7624 | -0.0678 | 0.2042 | 0.7960 | 1.7079 | 0.1913 | 50.5018 |
| SmallVesselStroke | genus. Slackia. id. 825             | MR Egger                  | 3 | -1.3687 | 1.3915 | 0.5052 | 0.2657  | 0.2577 | 0.4902 | 4.9388 | 0.0846 | 19.8459 |
| SmallVesselStroke | genus. Slackia. id. 825             | Weighted median           | 3 | 0.0166  | 0.1528 | 0.9134 | 0.2657  | 0.2577 | 0.4902 | 4.9388 | 0.0846 | 19.8459 |
| SmallVesselStroke | genus. Slackia. id. 825             | Inverse variance weighted | 3 | 0.0565  | 0.1639 | 0.7304 | 0.2657  | 0.2577 | 0.4902 | 4.9388 | 0.0846 | 19.8459 |
| SmallVesselStroke | genus. Slackia. id. 825             | Simple mode               | 3 | -0.0287 | 0.1932 | 0.8955 | 0.2657  | 0.2577 | 0.4902 | 4.9388 | 0.0846 | 19.8459 |
| SmallVesselStroke | genus. Slackia. id. 825             | Weighted mode             | 3 | -0.0287 | 0.1787 | 0.8872 | 0.2657  | 0.2577 | 0.4902 | 4.9388 | 0.0846 | 19.8459 |
| SmallVesselStroke | genus. Streptococcus. id. 1853      | MR Egger                  | 3 | -0.3079 | 1.0161 | 0.8127 | 0.0422  | 0.1877 | 0.8591 | 3.1696 | 0.0750 | 41.4608 |
| SmallVesselStroke | genus. Streptococcus. id. 1853      | Weighted median           | 3 | -0.1437 | 0.0897 | 0.1092 | 0.0422  | 0.1877 | 0.8591 | 3.1696 | 0.0750 | 41.4608 |
| SmallVesselStroke | genus. Streptococcus. id. 1853      | Inverse variance weighted | 3 | -0.0809 | 0.0843 | 0.3377 | 0.0422  | 0.1877 | 0.8591 | 3.1696 | 0.0750 | 41.4608 |
| SmallVesselStroke | genus. Streptococcus. id. 1853      | Simple mode               | 3 | -0.1609 | 0.1154 | 0.2980 | 0.0422  | 0.1877 | 0.8591 | 3.1696 | 0.0750 | 41.4608 |
| SmallVesselStroke | genus. Streptococcus. id. 1853      | Weighted mode             | 3 | -0.1619 | 0.1127 | 0.2875 | 0.0422  | 0.1877 | 0.8591 | 3.1696 | 0.0750 | 41.4608 |
| SmallVesselStroke | genus. Sutterella. id. 2896         | MR Egger                  | 3 | 1.0506  | 0.6413 | 0.3489 | -0.2155 | 0.1184 | 0.3200 | 3.3616 | 0.1862 | 36.6525 |
| SmallVesselStroke | genus. Sutterella. id. 2896         | Weighted median           | 3 | -0.1530 | 0.1031 | 0.1378 | -0.2155 | 0.1184 | 0.3200 | 3.3616 | 0.1862 | 36.6525 |
| SmallVesselStroke | genus. Sutterella. id. 2896         | Inverse variance weighted | 3 | -0.1083 | 0.0953 | 0.2561 | -0.2155 | 0.1184 | 0.3200 | 3.3616 | 0.1862 | 36.6525 |
| SmallVesselStroke | genus. Sutterella. id. 2896         | Simple mode               | 3 | -0.1913 | 0.1270 | 0.2709 | -0.2155 | 0.1184 | 0.3200 | 3.3616 | 0.1862 | 36.6525 |
| SmallVesselStroke | genus. Sutterella. id. 2896         | Weighted mode             | 3 | -0.1930 | 0.1380 | 0.2970 | -0.2155 | 0.1184 | 0.3200 | 3.3616 | 0.1862 | 36.6525 |
| SmallVesselStroke | genus. Terrisporobacter. id. 11348  | MR Egger                  | 3 | -1.7969 | 1.1069 | 0.3515 | 0.3666  | 0.2049 | 0.3244 | 6.6975 | 0.0351 | 16.0417 |
| SmallVesselStroke | genus. Terrisporobacter. id. 11348  | Weighted median           | 3 | 0.1002  | 0.1504 | 0.5055 | 0.3666  | 0.2049 | 0.3244 | 6.6975 | 0.0351 | 16.0417 |
| SmallVesselStroke | genus. Terrisporobacter. id. 11348  | Inverse variance weighted | 3 | 0.1708  | 0.1845 | 0.3545 | 0.3666  | 0.2049 | 0.3244 | 6.6975 | 0.0351 | 16.0417 |
| SmallVesselStroke | genus. Terrisporobacter. id. 11348  | Simple mode               | 3 | 0.0515  | 0.2215 | 0.8378 | 0.3666  | 0.2049 | 0.3244 | 6.6975 | 0.0351 | 16.0417 |
| SmallVesselStroke | genus. Terrisporobacter. id. 11348  | Weighted mode             | 3 | 0.0436  | 0.1874 | 0.8376 | 0.3666  | 0.2049 | 0.3244 | 6.6975 | 0.0351 | 16.0417 |
| SmallVesselStroke | genus. Turicibacter. id. 2162       | MR Egger                  | 3 | -1.2853 | 1.0989 | 0.4503 | 0.2293  | 0.2032 | 0.4617 | 4.7782 | 0.0917 | 25.1761 |
| SmallVesselStroke | genus. Turicibacter. id. 2162       | Weighted median           | 3 | -0.1285 | 0.1200 | 0.2842 | 0.2293  | 0.2032 | 0.4617 | 4.7782 | 0.0917 | 25.1761 |
| SmallVesselStroke | genus. Turicibacter. id. 2162       | Inverse variance weighted | 3 | -0.0537 | 0.1347 | 0.6904 | 0.2293  | 0.2032 | 0.4617 | 4.7782 | 0.0917 | 25.1761 |
| SmallVesselStroke | genus. Turicibacter. id. 2162       | Simple mode               | 3 | -0.1943 | 0.1718 | 0.3753 | 0.2293  | 0.2032 | 0.4617 | 4.7782 | 0.0917 | 25.1761 |
| SmallVesselStroke | genus. Turicibacter. id. 2162       | Weighted mode             | 3 | -0.1925 | 0.1631 | 0.3593 | 0.2293  | 0.2032 | 0.4617 | 4.7782 | 0.0917 | 25.1761 |
| SmallVesselStroke | genus. Tyzzerella3. id. 11335       | MR Egger                  | 3 | 1.1753  | 1.3117 | 0.5349 | -0.2183 | 0.2424 | 0.5332 | 1.6753 | 0.1955 | 27.4231 |
| SmallVesselStroke | genus. Tyzzerella3. id. 11335       | Weighted median           | 3 | 0.1165  | 0.1546 | 0.4511 | -0.2183 | 0.2424 | 0.5332 | 1.6753 | 0.1955 | 27.4231 |
| SmallVesselStroke | genus. Tyzzerella3. id. 11335       | Inverse variance weighted | 3 | 0.0015  | 0.1424 | 0.9916 | -0.2183 | 0.2424 | 0.5332 | 1.6753 | 0.1955 | 27.4231 |
| SmallVesselStroke | genus. Tyzzerella3. id. 11335       | Simple mode               | 3 | 0.1500  | 0.1979 | 0.5276 | -0.2183 | 0.2424 | 0.5332 | 1.6753 | 0.1955 | 27.4231 |
| SmallVesselStroke | genus. Tyzzerella3. id. 11335       | Weighted mode             | 3 | 0.1487  | 0.1799 | 0.4955 | -0.2183 | 0.2424 | 0.5332 | 1.6753 | 0.1955 | 27.4231 |
| SmallVesselStroke | genus. Veillonella. id. 2198        | MR Egger                  | 3 | -0.1987 | 0.8925 | 0.8605 | 0.0481  | 0.1646 | 0.8191 | 1.2976 | 0.2547 | 55.1392 |
| SmallVesselStroke | genus. Veillonella. id. 2198        | Weighted median           | 3 | -0.0062 | 0.1107 | 0.9551 | 0.0481  | 0.1646 | 0.8191 | 1.2976 | 0.2547 | 55.1392 |
| SmallVesselStroke | genus. Veillonella. id. 2198        | Inverse variance weighted | 3 | 0.0602  | 0.0890 | 0.4989 | 0.0481  | 0.1646 | 0.8191 | 1.2976 | 0.2547 | 55.1392 |
| SmallVesselStroke | genus. Veillonella. id. 2198        | Simple mode               | 3 | -0.0127 | 0.1388 | 0.9356 | 0.0481  | 0.1646 | 0.8191 | 1.2976 | 0.2547 | 55.1392 |
| SmallVesselStroke | genus. Veillonella. id. 2198        | Weighted mode             | 3 | -0.0133 | 0.1319 | 0.9288 | 0.0481  | 0.1646 | 0.8191 | 1.2976 | 0.2547 | 55.1392 |
| SmallVesselStroke | genus. unknowngenus. id. 1000000073 | MR Egger                  | 3 | -0.0071 | 0.7128 | 0.9937 | 0.0263  | 0.1316 | 0.8745 | 0.2296 | 0.6319 | 43.4924 |
| SmallVesselStroke | genus. unknowngenus. id. 1000000073 | Weighted median           | 3 | 0.1075  | 0.0981 | 0.2731 | 0.0263  | 0.1316 | 0.8745 | 0.2296 | 0.6319 | 43.4924 |
| SmallVesselStroke | genus. unknowngenus. id. 1000000073 | Inverse variance weighted | 3 | 0.1343  | 0.0815 | 0.0992 | 0.0263  | 0.1316 | 0.8745 | 0.2296 | 0.6319 | 43.4924 |
| SmallVesselStroke | genus. unknowngenus. id. 1000000073 | Simple mode               | 3 | 0.1050  | 0.1211 | 0.4772 | 0.0263  | 0.1316 | 0.8745 | 0.2296 | 0.6319 | 43.4924 |
| SmallVesselStroke | genus. unknowngenus. id. 1000000073 | Weighted mode             | 3 | 0.1053  | 0.1064 | 0.4268 | 0.0263  | 0.1316 | 0.8745 | 0.2296 | 0.6319 | 43.4924 |
| SmallVesselStroke | genus. unknowngenus. id. 1000001215 | MR Egger                  | 3 | 0.0229  | 1.0676 | 0.9864 | -0.0422 | 0.1970 | 0.8658 | 1.2571 | 0.2622 | 22.1692 |
| SmallVesselStroke | genus. unknowngenus. id. 1000001215 | Weighted median           | 3 | -0.1868 | 0.1388 | 0.1783 | -0.0422 | 0.1970 | 0.8658 | 1.2571 | 0.2622 | 22.1692 |
| SmallVesselStroke | genus. unknowngenus. id. 1000001215 | Inverse variance weighted | 3 | -0.2041 | 0.1083 | 0.0593 | -0.0422 | 0.1970 | 0.8658 | 1.2571 | 0.2622 | 22.1692 |
| SmallVesselStroke | genus. unknowngenus. id. 1000001215 | Simple mode               | 3 | -0.1668 | 0.1730 | 0.4365 | -0.0422 | 0.1970 | 0.8658 | 1.2571 | 0.2622 | 22.1692 |
| SmallVesselStroke | genus. unknowngenus. id. 1000001215 | Weighted mode             | 3 | -0.1539 | 0.1761 | 0.4744 | -0.0422 | 0.1970 | 0.8658 | 1.2571 | 0.2622 | 22.1692 |
| SmallVesselStroke | genus. unknowngenus. id. 1000005472 | MR Egger                  | 3 | 1.4330  | 0.7120 | 0.2936 | -0.2587 | 0.1316 | 0.2997 | 4.4966 | 0.1056 | 24.8500 |
| SmallVesselStroke | genus. unknowngenus. id. 1000005472 | Weighted median           | 3 | -0.0287 | 0.1139 | 0.8007 | -0.2587 | 0.1316 | 0.2997 | 4.4966 | 0.1056 | 24.8500 |
| SmallVesselStroke | genus. unknowngenus. id. 1000005472 | Inverse variance weighted | 3 | 0.0431  | 0.1226 | 0.7250 | -0.2587 | 0.1316 | 0.2997 | 4.4966 | 0.1056 | 24.8500 |
| SmallVesselStroke | genus. unknowngenus. id. 1000005472 | Simple mode               | 3 | -0.0740 | 0.1477 | 0.6662 | -0.2587 | 0.1316 | 0.2997 | 4.4966 | 0.1056 | 24.8500 |

|                   |                                     |                           |   |         |        |        |         |        |        |        |        |          |
|-------------------|-------------------------------------|---------------------------|---|---------|--------|--------|---------|--------|--------|--------|--------|----------|
| SmallVesselStroke | genus. unknowngenus. id. 1000005472 | Weighted mode             | 3 | -0.0676 | 0.1327 | 0.6611 | -0.2587 | 0.1316 | 0.2997 | 4.4966 | 0.1056 | 24.8500  |
| SmallVesselStroke | genus. unknowngenus. id. 1000005479 | MR Egger                  | 3 | -1.0715 | 0.8155 | 0.4142 | 0.1808  | 0.1507 | 0.4424 | 1.5269 | 0.4661 | 30.2124  |
| SmallVesselStroke | genus. unknowngenus. id. 1000005479 | Weighted median           | 3 | -0.0701 | 0.1169 | 0.5489 | 0.1808  | 0.1507 | 0.4424 | 1.5269 | 0.4661 | 30.2124  |
| SmallVesselStroke | genus. unknowngenus. id. 1000005479 | Inverse variance weighted | 3 | -0.0997 | 0.0939 | 0.2882 | 0.1808  | 0.1507 | 0.4424 | 1.5269 | 0.4661 | 30.2124  |
| SmallVesselStroke | genus. unknowngenus. id. 1000005479 | Simple mode               | 3 | -0.0511 | 0.1463 | 0.7603 | 0.1808  | 0.1507 | 0.4424 | 1.5269 | 0.4661 | 30.2124  |
| SmallVesselStroke | genus. unknowngenus. id. 1000005479 | Weighted mode             | 3 | -0.0389 | 0.1549 | 0.8253 | 0.1808  | 0.1507 | 0.4424 | 1.5269 | 0.4661 | 30.2124  |
| SmallVesselStroke | genus. unknowngenus. id. 1000006162 | MR Egger                  | 3 | -0.4732 | 1.0066 | 0.7202 | 0.0901  | 0.1859 | 0.7126 | 0.5733 | 0.4489 | 61.3416  |
| SmallVesselStroke | genus. unknowngenus. id. 1000006162 | Weighted median           | 3 | -0.0313 | 0.1382 | 0.8207 | 0.0901  | 0.1859 | 0.7126 | 0.5733 | 0.4489 | 61.3416  |
| SmallVesselStroke | genus. unknowngenus. id. 1000006162 | Inverse variance weighted | 3 | 0.0115  | 0.1151 | 0.9202 | 0.0901  | 0.1859 | 0.7126 | 0.5733 | 0.4489 | 61.3416  |
| SmallVesselStroke | genus. unknowngenus. id. 1000006162 | Simple mode               | 3 | -0.0604 | 0.1570 | 0.7375 | 0.0901  | 0.1859 | 0.7126 | 0.5733 | 0.4489 | 61.3416  |
| SmallVesselStroke | genus. unknowngenus. id. 1000006162 | Weighted mode             | 3 | -0.0581 | 0.1647 | 0.7581 | 0.0901  | 0.1859 | 0.7126 | 0.5733 | 0.4489 | 61.3416  |
| SmallVesselStroke | genus. unknowngenus. id. 1868       | MR Egger                  | 3 | 0.4497  | 0.8941 | 0.7034 | -0.0641 | 0.1654 | 0.7646 | 1.6125 | 0.2041 | 36.1105  |
| SmallVesselStroke | genus. unknowngenus. id. 1868       | Weighted median           | 3 | 0.1708  | 0.1013 | 0.0918 | -0.0641 | 0.1654 | 0.7646 | 1.6125 | 0.2041 | 36.1105  |
| SmallVesselStroke | genus. unknowngenus. id. 1868       | Inverse variance weighted | 3 | 0.1054  | 0.0808 | 0.1920 | -0.0641 | 0.1654 | 0.7646 | 1.6125 | 0.2041 | 36.1105  |
| SmallVesselStroke | genus. unknowngenus. id. 1868       | Simple mode               | 3 | 0.1826  | 0.1284 | 0.2911 | -0.0641 | 0.1654 | 0.7646 | 1.6125 | 0.2041 | 36.1105  |
| SmallVesselStroke | genus. unknowngenus. id. 1868       | Weighted mode             | 3 | 0.1826  | 0.1323 | 0.3018 | -0.0641 | 0.1654 | 0.7646 | 1.6125 | 0.2041 | 36.1105  |
| SmallVesselStroke | genus. unknowngenus. id. 2001       | MR Egger                  | 3 | -0.4023 | 0.7409 | 0.6833 | 0.0971  | 0.1367 | 0.6070 | 0.2940 | 0.5876 | 48.9105  |
| SmallVesselStroke | genus. unknowngenus. id. 2001       | Weighted median           | 3 | 0.0933  | 0.1072 | 0.3841 | 0.0971  | 0.1367 | 0.6070 | 0.2940 | 0.5876 | 48.9105  |
| SmallVesselStroke | genus. unknowngenus. id. 2001       | Inverse variance weighted | 3 | 0.1202  | 0.0841 | 0.1531 | 0.0971  | 0.1367 | 0.6070 | 0.2940 | 0.5876 | 48.9105  |
| SmallVesselStroke | genus. unknowngenus. id. 2001       | Simple mode               | 3 | 0.0670  | 0.1233 | 0.6412 | 0.0971  | 0.1367 | 0.6070 | 0.2940 | 0.5876 | 48.9105  |
| SmallVesselStroke | genus. unknowngenus. id. 2001       | Weighted mode             | 3 | 0.0680  | 0.1280 | 0.6486 | 0.0971  | 0.1367 | 0.6070 | 0.2940 | 0.5876 | 48.9105  |
| SmallVesselStroke | genus. unknowngenus. id. 2041       | MR Egger                  | 3 | -0.4471 | 1.0225 | 0.7376 | 0.0835  | 0.1891 | 0.7353 | 1.6334 | 0.2012 | 48.6457  |
| SmallVesselStroke | genus. unknowngenus. id. 2041       | Weighted median           | 3 | -0.0800 | 0.1176 | 0.4963 | 0.0835  | 0.1891 | 0.7353 | 1.6334 | 0.2012 | 48.6457  |
| SmallVesselStroke | genus. unknowngenus. id. 2041       | Inverse variance weighted | 3 | 0.0014  | 0.0918 | 0.9880 | 0.0835  | 0.1891 | 0.7353 | 1.6334 | 0.2012 | 48.6457  |
| SmallVesselStroke | genus. unknowngenus. id. 2041       | Simple mode               | 3 | -0.0883 | 0.1509 | 0.6179 | 0.0835  | 0.1891 | 0.7353 | 1.6334 | 0.2012 | 48.6457  |
| SmallVesselStroke | genus. unknowngenus. id. 2041       | Weighted mode             | 3 | -0.0883 | 0.1371 | 0.5857 | 0.0835  | 0.1891 | 0.7353 | 1.6334 | 0.2012 | 48.6457  |
| SmallVesselStroke | genus. unknowngenus. id. 2071       | MR Egger                  | 3 | -0.4797 | 0.6423 | 0.5916 | 0.0973  | 0.1188 | 0.5632 | 0.4085 | 0.5227 | 87.2961  |
| SmallVesselStroke | genus. unknowngenus. id. 2071       | Weighted median           | 3 | 0.0135  | 0.0927 | 0.8839 | 0.0973  | 0.1188 | 0.5632 | 0.4085 | 0.5227 | 87.2961  |
| SmallVesselStroke | genus. unknowngenus. id. 2071       | Inverse variance weighted | 3 | 0.0428  | 0.0740 | 0.5635 | 0.0973  | 0.1188 | 0.5632 | 0.4085 | 0.5227 | 87.2961  |
| SmallVesselStroke | genus. unknowngenus. id. 2071       | Simple mode               | 3 | -0.0130 | 0.1130 | 0.9188 | 0.0973  | 0.1188 | 0.5632 | 0.4085 | 0.5227 | 87.2961  |
| SmallVesselStroke | genus. unknowngenus. id. 2071       | Weighted mode             | 3 | -0.0130 | 0.1066 | 0.9139 | 0.0973  | 0.1188 | 0.5632 | 0.4085 | 0.5227 | 87.2961  |
| SmallVesselStroke | genus. unknowngenus. id. 2755       | MR Egger                  | 3 | -0.4951 | 0.7746 | 0.6380 | 0.0878  | 0.1433 | 0.6502 | 0.6049 | 0.4367 | 65.8367  |
| SmallVesselStroke | genus. unknowngenus. id. 2755       | Weighted median           | 3 | -0.0496 | 0.1110 | 0.6551 | 0.0878  | 0.1433 | 0.6502 | 0.6049 | 0.4367 | 65.8367  |
| SmallVesselStroke | genus. unknowngenus. id. 2755       | Inverse variance weighted | 3 | -0.0238 | 0.0891 | 0.7893 | 0.0878  | 0.1433 | 0.6502 | 0.6049 | 0.4367 | 65.8367  |
| SmallVesselStroke | genus. unknowngenus. id. 2755       | Simple mode               | 3 | -0.0783 | 0.1260 | 0.5976 | 0.0878  | 0.1433 | 0.6502 | 0.6049 | 0.4367 | 65.8367  |
| SmallVesselStroke | genus. unknowngenus. id. 2755       | Weighted mode             | 3 | -0.0759 | 0.1173 | 0.5841 | 0.0878  | 0.1433 | 0.6502 | 0.6049 | 0.4367 | 65.8367  |
| SmallVesselStroke | genus. unknowngenus. id. 826        | MR Egger                  | 3 | -0.7165 | 0.6167 | 0.4524 | 0.1236  | 0.1141 | 0.4746 | 1.3225 | 0.5162 | 53.6975  |
| SmallVesselStroke | genus. unknowngenus. id. 826        | Weighted median           | 3 | -0.0161 | 0.0928 | 0.8627 | 0.1236  | 0.1141 | 0.4746 | 1.3225 | 0.5162 | 53.6975  |
| SmallVesselStroke | genus. unknowngenus. id. 826        | Inverse variance weighted | 3 | -0.0531 | 0.0712 | 0.4559 | 0.1236  | 0.1141 | 0.4746 | 1.3225 | 0.5162 | 53.6975  |
| SmallVesselStroke | genus. unknowngenus. id. 826        | Simple mode               | 3 | 0.0037  | 0.1034 | 0.9747 | 0.1236  | 0.1141 | 0.4746 | 1.3225 | 0.5162 | 53.6975  |
| SmallVesselStroke | genus. unknowngenus. id. 826        | Weighted mode             | 3 | 0.0019  | 0.1056 | 0.9872 | 0.1236  | 0.1141 | 0.4746 | 1.3225 | 0.5162 | 53.6975  |
| SmallVesselStroke | genus. unknowngenus. id. 959        | MR Egger                  | 3 | 0.5726  | 1.0796 | 0.6895 | -0.1065 | 0.2000 | 0.6885 | 0.2874 | 0.8661 | 93.4366  |
| SmallVesselStroke | genus. unknowngenus. id. 959        | Weighted median           | 3 | -0.0242 | 0.1563 | 0.8770 | -0.1065 | 0.2000 | 0.6885 | 0.2874 | 0.8661 | 93.4366  |
| SmallVesselStroke | genus. unknowngenus. id. 959        | Inverse variance weighted | 3 | 0.0015  | 0.1247 | 0.9905 | -0.1065 | 0.2000 | 0.6885 | 0.2874 | 0.8661 | 93.4366  |
| SmallVesselStroke | genus. unknowngenus. id. 959        | Simple mode               | 3 | -0.0424 | 0.1661 | 0.8225 | -0.1065 | 0.2000 | 0.6885 | 0.2874 | 0.8661 | 93.4366  |
| SmallVesselStroke | genus. unknowngenus. id. 959        | Weighted mode             | 3 | -0.0432 | 0.1610 | 0.8137 | -0.1065 | 0.2000 | 0.6885 | 0.2874 | 0.8661 | 93.4366  |
| SmallVesselStroke | order. Actinomycetales. id. 420     | MR Egger                  | 3 | 0.1486  | 1.3018 | 0.9277 | -0.0237 | 0.2407 | 0.9375 | 2.6023 | 0.1067 | 42.9319  |
| SmallVesselStroke | order. Actinomycetales. id. 420     | Weighted median           | 3 | 0.0016  | 0.1251 | 0.9896 | -0.0237 | 0.2407 | 0.9375 | 2.6023 | 0.1067 | 42.9319  |
| SmallVesselStroke | order. Actinomycetales. id. 420     | Inverse variance weighted | 3 | 0.0211  | 0.1062 | 0.8423 | -0.0237 | 0.2407 | 0.9375 | 2.6023 | 0.1067 | 42.9319  |
| SmallVesselStroke | order. Actinomycetales. id. 420     | Simple mode               | 3 | -0.0228 | 0.1567 | 0.8976 | -0.0237 | 0.2407 | 0.9375 | 2.6023 | 0.1067 | 42.9319  |
| SmallVesselStroke | order. Actinomycetales. id. 420     | Weighted mode             | 3 | -0.0386 | 0.1569 | 0.8285 | -0.0237 | 0.2407 | 0.9375 | 2.6023 | 0.1067 | 42.9319  |
| SmallVesselStroke | order. Bacteroidales. id. 913       | MR Egger                  | 3 | 0.1325  | 0.5450 | 0.8481 | -0.0137 | 0.1006 | 0.9141 | 0.9366 | 0.3332 | 80.7640  |
| SmallVesselStroke | order. Bacteroidales. id. 913       | Weighted median           | 3 | 0.0853  | 0.0782 | 0.2750 | -0.0137 | 0.1006 | 0.9141 | 0.9366 | 0.3332 | 80.7640  |
| SmallVesselStroke | order. Bacteroidales. id. 913       | Inverse variance weighted | 3 | 0.0590  | 0.0623 | 0.3438 | -0.0137 | 0.1006 | 0.9141 | 0.9366 | 0.3332 | 80.7640  |
| SmallVesselStroke | order. Bacteroidales. id. 913       | Simple mode               | 3 | 0.0982  | 0.0911 | 0.3939 | -0.0137 | 0.1006 | 0.9141 | 0.9366 | 0.3332 | 80.7640  |
| SmallVesselStroke | order. Bacteroidales. id. 913       | Weighted mode             | 3 | 0.0995  | 0.0921 | 0.3930 | -0.0137 | 0.1006 | 0.9141 | 0.9366 | 0.3332 | 80.7640  |
| SmallVesselStroke | order. Bifidobacteriales. id. 432   | MR Egger                  | 3 | -0.5098 | 0.6007 | 0.5520 | 0.0983  | 0.1109 | 0.5382 | 0.7871 | 0.6747 | 106.4310 |
| SmallVesselStroke | order. Bifidobacteriales. id. 432   | Weighted median           | 3 | 0.0537  | 0.0816 | 0.5106 | 0.0983  | 0.1109 | 0.5382 | 0.7871 | 0.6747 | 106.4310 |

|                   |                                      |                           |   |         |        |        |         |        |        |        |        |          |
|-------------------|--------------------------------------|---------------------------|---|---------|--------|--------|---------|--------|--------|--------|--------|----------|
| SmallVesselStroke | order. Bifidobacteriales. id. 432    | Inverse variance weighted | 3 | 0.0192  | 0.0689 | 0.7806 | 0.0983  | 0.1109 | 0.5382 | 0.7871 | 0.6747 | 106.4310 |
| SmallVesselStroke | order. Bifidobacteriales. id. 432    | Simple mode               | 3 | 0.0598  | 0.0978 | 0.6029 | 0.0983  | 0.1109 | 0.5382 | 0.7871 | 0.6747 | 106.4310 |
| SmallVesselStroke | order. Bifidobacteriales. id. 432    | Weighted mode             | 3 | 0.0603  | 0.0972 | 0.5982 | 0.0983  | 0.1109 | 0.5382 | 0.7871 | 0.6747 | 106.4310 |
| SmallVesselStroke | order. Burkholderiales. id. 2874     | MR Egger                  | 3 | 0.5019  | 0.5648 | 0.5375 | -0.1177 | 0.1043 | 0.4615 | 1.2776 | 0.5279 | 44.9185  |
| SmallVesselStroke | order. Burkholderiales. id. 2874     | Weighted median           | 3 | -0.1630 | 0.0827 | 0.0486 | -0.1177 | 0.1043 | 0.4615 | 1.2776 | 0.5279 | 44.9185  |
| SmallVesselStroke | order. Burkholderiales. id. 2874     | Inverse variance weighted | 3 | -0.1315 | 0.0646 | 0.0418 | -0.1177 | 0.1043 | 0.4615 | 1.2776 | 0.5279 | 44.9185  |
| SmallVesselStroke | order. Burkholderiales. id. 2874     | Simple mode               | 3 | -0.1785 | 0.0955 | 0.2024 | -0.1177 | 0.1043 | 0.4615 | 1.2776 | 0.5279 | 44.9185  |
| SmallVesselStroke | order. Burkholderiales. id. 2874     | Weighted mode             | 3 | -0.1800 | 0.0950 | 0.1985 | -0.1177 | 0.1043 | 0.4615 | 1.2776 | 0.5279 | 44.9185  |
| SmallVesselStroke | order. Clostridiales. id. 1863       | MR Egger                  | 3 | -0.2095 | 0.5451 | 0.7664 | 0.0217  | 0.1006 | 0.8645 | 0.8043 | 0.3698 | 57.2580  |
| SmallVesselStroke | order. Clostridiales. id. 1863       | Weighted median           | 3 | -0.1243 | 0.0773 | 0.1081 | 0.0217  | 0.1006 | 0.8645 | 0.8043 | 0.3698 | 57.2580  |
| SmallVesselStroke | order. Clostridiales. id. 1863       | Inverse variance weighted | 3 | -0.0925 | 0.0623 | 0.1378 | 0.0217  | 0.1006 | 0.8645 | 0.8043 | 0.3698 | 57.2580  |
| SmallVesselStroke | order. Clostridiales. id. 1863       | Simple mode               | 3 | -0.1307 | 0.0933 | 0.2961 | 0.0217  | 0.1006 | 0.8645 | 0.8043 | 0.3698 | 57.2580  |
| SmallVesselStroke | order. Clostridiales. id. 1863       | Weighted mode             | 3 | -0.1316 | 0.0936 | 0.2951 | 0.0217  | 0.1006 | 0.8645 | 0.8043 | 0.3698 | 57.2580  |
| SmallVesselStroke | order. Coriobacteriales. id. 810     | MR Egger                  | 3 | -0.7308 | 0.6319 | 0.4539 | 0.1268  | 0.1167 | 0.4737 | 2.8921 | 0.2355 | 44.8496  |
| SmallVesselStroke | order. Coriobacteriales. id. 810     | Weighted median           | 3 | -0.0527 | 0.0872 | 0.5456 | 0.1268  | 0.1167 | 0.4737 | 2.8921 | 0.2355 | 44.8496  |
| SmallVesselStroke | order. Coriobacteriales. id. 810     | Inverse variance weighted | 3 | -0.0490 | 0.0757 | 0.5178 | 0.1268  | 0.1167 | 0.4737 | 2.8921 | 0.2355 | 44.8496  |
| SmallVesselStroke | order. Coriobacteriales. id. 810     | Simple mode               | 3 | -0.0798 | 0.1033 | 0.5207 | 0.1268  | 0.1167 | 0.4737 | 2.8921 | 0.2355 | 44.8496  |
| SmallVesselStroke | order. Coriobacteriales. id. 810     | Weighted mode             | 3 | -0.0681 | 0.1055 | 0.5849 | 0.1268  | 0.1167 | 0.4737 | 2.8921 | 0.2355 | 44.8496  |
| SmallVesselStroke | order. Desulfovibrionales. id. 3156  | MR Egger                  | 3 | -0.1657 | 0.5972 | 0.8277 | 0.0204  | 0.1103 | 0.8835 | 0.0489 | 0.8249 | 110.8974 |
| SmallVesselStroke | order. Desulfovibrionales. id. 3156  | Weighted median           | 3 | -0.0604 | 0.0828 | 0.4659 | 0.0204  | 0.1103 | 0.8835 | 0.0489 | 0.8249 | 110.8974 |
| SmallVesselStroke | order. Desulfovibrionales. id. 3156  | Inverse variance weighted | 3 | -0.0558 | 0.0684 | 0.4141 | 0.0204  | 0.1103 | 0.8835 | 0.0489 | 0.8249 | 110.8974 |
| SmallVesselStroke | order. Desulfovibrionales. id. 3156  | Simple mode               | 3 | -0.0660 | 0.0870 | 0.5271 | 0.0204  | 0.1103 | 0.8835 | 0.0489 | 0.8249 | 110.8974 |
| SmallVesselStroke | order. Desulfovibrionales. id. 3156  | Weighted mode             | 3 | -0.0651 | 0.0915 | 0.5504 | 0.0204  | 0.1103 | 0.8835 | 0.0489 | 0.8249 | 110.8974 |
| SmallVesselStroke | order. Enterobacteriales. id. 3468   | MR Egger                  | 3 | -0.1386 | 0.6285 | 0.8618 | 0.0316  | 0.1161 | 0.8308 | 0.0302 | 0.8620 | 207.3541 |
| SmallVesselStroke | order. Enterobacteriales. id. 3468   | Weighted median           | 3 | 0.0346  | 0.0869 | 0.6901 | 0.0316  | 0.1161 | 0.8308 | 0.0302 | 0.8620 | 207.3541 |
| SmallVesselStroke | order. Enterobacteriales. id. 3468   | Inverse variance weighted | 3 | 0.0314  | 0.0722 | 0.6642 | 0.0316  | 0.1161 | 0.8308 | 0.0302 | 0.8620 | 207.3541 |
| SmallVesselStroke | order. Enterobacteriales. id. 3468   | Simple mode               | 3 | 0.0412  | 0.0993 | 0.7186 | 0.0316  | 0.1161 | 0.8308 | 0.0302 | 0.8620 | 207.3541 |
| SmallVesselStroke | order. Enterobacteriales. id. 3468   | Weighted mode             | 3 | 0.0397  | 0.0959 | 0.7190 | 0.0316  | 0.1161 | 0.8308 | 0.0302 | 0.8620 | 207.3541 |
| SmallVesselStroke | order. Erysipelotrichales. id. 2148  | MR Egger                  | 3 | -0.1852 | 0.5457 | 0.7917 | 0.0224  | 0.1008 | 0.8605 | 0.5771 | 0.4474 | 80.8024  |
| SmallVesselStroke | order. Erysipelotrichales. id. 2148  | Weighted median           | 3 | -0.0949 | 0.0785 | 0.2268 | 0.0224  | 0.1008 | 0.8605 | 0.5771 | 0.4474 | 80.8024  |
| SmallVesselStroke | order. Erysipelotrichales. id. 2148  | Inverse variance weighted | 3 | -0.0645 | 0.0625 | 0.3014 | 0.0224  | 0.1008 | 0.8605 | 0.5771 | 0.4474 | 80.8024  |
| SmallVesselStroke | order. Erysipelotrichales. id. 2148  | Simple mode               | 3 | -0.0980 | 0.0898 | 0.3888 | 0.0224  | 0.1008 | 0.8605 | 0.5771 | 0.4474 | 80.8024  |
| SmallVesselStroke | order. Erysipelotrichales. id. 2148  | Weighted mode             | 3 | -0.0983 | 0.0899 | 0.3884 | 0.0224  | 0.1008 | 0.8605 | 0.5771 | 0.4474 | 80.8024  |
| SmallVesselStroke | order. Gastranaerophilales. id. 1591 | MR Egger                  | 3 | 0.0229  | 1.0676 | 0.9864 | -0.0422 | 0.1970 | 0.8658 | 1.2571 | 0.2622 | 22.1692  |
| SmallVesselStroke | order. Gastranaerophilales. id. 1591 | Weighted median           | 3 | -0.1868 | 0.1361 | 0.1698 | -0.0422 | 0.1970 | 0.8658 | 1.2571 | 0.2622 | 22.1692  |
| SmallVesselStroke | order. Gastranaerophilales. id. 1591 | Inverse variance weighted | 3 | -0.2041 | 0.1083 | 0.0593 | -0.0422 | 0.1970 | 0.8658 | 1.2571 | 0.2622 | 22.1692  |
| SmallVesselStroke | order. Gastranaerophilales. id. 1591 | Simple mode               | 3 | -0.1668 | 0.1717 | 0.4337 | -0.0422 | 0.1970 | 0.8658 | 1.2571 | 0.2622 | 22.1692  |
| SmallVesselStroke | order. Gastranaerophilales. id. 1591 | Weighted mode             | 3 | -0.1539 | 0.1644 | 0.4479 | -0.0422 | 0.1970 | 0.8658 | 1.2571 | 0.2622 | 22.1692  |
| SmallVesselStroke | order. Lactobacillales. id. 1800     | MR Egger                  | 3 | -0.1954 | 0.5587 | 0.7858 | 0.0258  | 0.1032 | 0.8440 | 0.1022 | 0.7492 | 103.4718 |
| SmallVesselStroke | order. Lactobacillales. id. 1800     | Weighted median           | 3 | -0.0636 | 0.0761 | 0.4037 | 0.0258  | 0.1032 | 0.8440 | 0.1022 | 0.7492 | 103.4718 |
| SmallVesselStroke | order. Lactobacillales. id. 1800     | Inverse variance weighted | 3 | -0.0566 | 0.0639 | 0.3757 | 0.0258  | 0.1032 | 0.8440 | 0.1022 | 0.7492 | 103.4718 |
| SmallVesselStroke | order. Lactobacillales. id. 1800     | Simple mode               | 3 | -0.0724 | 0.0866 | 0.4911 | 0.0258  | 0.1032 | 0.8440 | 0.1022 | 0.7492 | 103.4718 |
| SmallVesselStroke | order. Lactobacillales. id. 1800     | Weighted mode             | 3 | -0.0713 | 0.0895 | 0.5094 | 0.0258  | 0.1032 | 0.8440 | 0.1022 | 0.7492 | 103.4718 |
| SmallVesselStroke | order. Methanobacteriales. id. 120   | Inverse variance weighted | 2 | -0.0593 | 0.1657 | 0.7204 | NA      | NA     | NA     | 0.0022 | 0.9623 | 83.9359  |
| SmallVesselStroke | order. MollicutesRF9. id. 11579      | MR Egger                  | 3 | 1.4330  | 0.7120 | 0.2936 | -0.2587 | 0.1316 | 0.2997 | 4.4966 | 0.1056 | 24.8500  |
| SmallVesselStroke | order. MollicutesRF9. id. 11579      | Weighted median           | 3 | -0.0287 | 0.1128 | 0.7989 | -0.2587 | 0.1316 | 0.2997 | 4.4966 | 0.1056 | 24.8500  |
| SmallVesselStroke | order. MollicutesRF9. id. 11579      | Inverse variance weighted | 3 | 0.0431  | 0.1226 | 0.7250 | -0.2587 | 0.1316 | 0.2997 | 4.4966 | 0.1056 | 24.8500  |
| SmallVesselStroke | order. MollicutesRF9. id. 11579      | Simple mode               | 3 | -0.0740 | 0.1460 | 0.6627 | -0.2587 | 0.1316 | 0.2997 | 4.4966 | 0.1056 | 24.8500  |
| SmallVesselStroke | order. MollicutesRF9. id. 11579      | Weighted mode             | 3 | -0.0676 | 0.1263 | 0.6460 | -0.2587 | 0.1316 | 0.2997 | 4.4966 | 0.1056 | 24.8500  |
| SmallVesselStroke | order. NBIn. id. 3953                | MR Egger                  | 3 | -0.4732 | 1.0066 | 0.7202 | 0.0901  | 0.1859 | 0.7126 | 0.5733 | 0.4489 | 61.3416  |
| SmallVesselStroke | order. NBIn. id. 3953                | Weighted median           | 3 | -0.0313 | 0.1365 | 0.8186 | 0.0901  | 0.1859 | 0.7126 | 0.5733 | 0.4489 | 61.3416  |
| SmallVesselStroke | order. NBIn. id. 3953                | Inverse variance weighted | 3 | 0.0115  | 0.1151 | 0.9202 | 0.0901  | 0.1859 | 0.7126 | 0.5733 | 0.4489 | 61.3416  |
| SmallVesselStroke | order. NBIn. id. 3953                | Simple mode               | 3 | -0.0604 | 0.1726 | 0.7599 | 0.0901  | 0.1859 | 0.7126 | 0.5733 | 0.4489 | 61.3416  |
| SmallVesselStroke | order. NBIn. id. 3953                | Weighted mode             | 3 | -0.0581 | 0.1724 | 0.7684 | 0.0901  | 0.1859 | 0.7126 | 0.5733 | 0.4489 | 61.3416  |
| SmallVesselStroke | order. Pasteurellales. id. 3688      | MR Egger                  | 3 | 0.6131  | 0.7694 | 0.5717 | -0.1123 | 0.1420 | 0.5739 | 0.8086 | 0.6674 | 72.6677  |
| SmallVesselStroke | order. Pasteurellales. id. 3688      | Weighted median           | 3 | -0.0115 | 0.1081 | 0.9149 | -0.1123 | 0.1420 | 0.5739 | 0.8086 | 0.6674 | 72.6677  |
| SmallVesselStroke | order. Pasteurellales. id. 3688      | Inverse variance weighted | 3 | 0.0083  | 0.0879 | 0.9244 | -0.1123 | 0.1420 | 0.5739 | 0.8086 | 0.6674 | 72.6677  |
| SmallVesselStroke | order. Pasteurellales. id. 3688      | Simple mode               | 3 | -0.0316 | 0.1254 | 0.8247 | -0.1123 | 0.1420 | 0.5739 | 0.8086 | 0.6674 | 72.6677  |

|                   |                                     |                           |   |         |        |        |         |        |        |        |        |          |
|-------------------|-------------------------------------|---------------------------|---|---------|--------|--------|---------|--------|--------|--------|--------|----------|
| SmallVesselStroke | order. Pasteurellales. id. 3688     | Weighted mode             | 3 | -0.0291 | 0.1178 | 0.8278 | -0.1123 | 0.1420 | 0.5739 | 0.8086 | 0.6674 | 72.6677  |
| SmallVesselStroke | order. Rhodospirillales. id. 2667   | MR Egger                  | 3 | -0.5852 | 0.7717 | 0.5870 | 0.1035  | 0.1427 | 0.6006 | 0.3797 | 0.5377 | 63.7873  |
| SmallVesselStroke | order. Rhodospirillales. id. 2667   | Weighted median           | 3 | -0.0313 | 0.1128 | 0.7816 | 0.1035  | 0.1427 | 0.6006 | 0.3797 | 0.5377 | 63.7873  |
| SmallVesselStroke | order. Rhodospirillales. id. 2667   | Inverse variance weighted | 3 | -0.0293 | 0.0888 | 0.7416 | 0.1035  | 0.1427 | 0.6006 | 0.3797 | 0.5377 | 63.7873  |
| SmallVesselStroke | order. Rhodospirillales. id. 2667   | Simple mode               | 3 | -0.0443 | 0.1340 | 0.7725 | 0.1035  | 0.1427 | 0.6006 | 0.3797 | 0.5377 | 63.7873  |
| SmallVesselStroke | order. Rhodospirillales. id. 2667   | Weighted mode             | 3 | -0.0377 | 0.1327 | 0.8029 | 0.1035  | 0.1427 | 0.6006 | 0.3797 | 0.5377 | 63.7873  |
| SmallVesselStroke | order. Selenomonadales. id. 2165    | MR Egger                  | 3 | -0.3214 | 0.7744 | 0.7495 | 0.0543  | 0.1430 | 0.7688 | 2.0040 | 0.1569 | 64.7194  |
| SmallVesselStroke | order. Selenomonadales. id. 2165    | Weighted median           | 3 | -0.0906 | 0.0848 | 0.2853 | 0.0543  | 0.1430 | 0.7688 | 2.0040 | 0.1569 | 64.7194  |
| SmallVesselStroke | order. Selenomonadales. id. 2165    | Inverse variance weighted | 3 | -0.0291 | 0.0670 | 0.6645 | 0.0543  | 0.1430 | 0.7688 | 2.0040 | 0.1569 | 64.7194  |
| SmallVesselStroke | order. Selenomonadales. id. 2165    | Simple mode               | 3 | -0.0938 | 0.1015 | 0.4530 | 0.0543  | 0.1430 | 0.7688 | 2.0040 | 0.1569 | 64.7194  |
| SmallVesselStroke | order. Selenomonadales. id. 2165    | Weighted mode             | 3 | -0.0938 | 0.0960 | 0.4316 | 0.0543  | 0.1430 | 0.7688 | 2.0040 | 0.1569 | 64.7194  |
| SmallVesselStroke | order. Verrucomicrobiales. id. 4030 | MR Egger                  | 3 | 0.6913  | 0.6612 | 0.4858 | -0.1138 | 0.1221 | 0.5225 | 0.8813 | 0.6436 | 48.1731  |
| SmallVesselStroke | order. Verrucomicrobiales. id. 4030 | Weighted median           | 3 | 0.0517  | 0.0928 | 0.5780 | -0.1138 | 0.1221 | 0.5225 | 0.8813 | 0.6436 | 48.1731  |
| SmallVesselStroke | order. Verrucomicrobiales. id. 4030 | Inverse variance weighted | 3 | 0.0794  | 0.0759 | 0.2955 | -0.1138 | 0.1221 | 0.5225 | 0.8813 | 0.6436 | 48.1731  |
| SmallVesselStroke | order. Verrucomicrobiales. id. 4030 | Simple mode               | 3 | 0.0357  | 0.1174 | 0.7899 | -0.1138 | 0.1221 | 0.5225 | 0.8813 | 0.6436 | 48.1731  |
| SmallVesselStroke | order. Verrucomicrobiales. id. 4030 | Weighted mode             | 3 | 0.0321  | 0.1183 | 0.8114 | -0.1138 | 0.1221 | 0.5225 | 0.8813 | 0.6436 | 48.1731  |
| SmallVesselStroke | order. Victivallales. id. 2254      | MR Egger                  | 3 | -1.3480 | 1.4649 | 0.5264 | 0.2400  | 0.2700 | 0.5374 | 1.7959 | 0.1802 | 21.3298  |
| SmallVesselStroke | order. Victivallales. id. 2254      | Weighted median           | 3 | -0.1674 | 0.1629 | 0.3041 | 0.2400  | 0.2700 | 0.5374 | 1.7959 | 0.1802 | 21.3298  |
| SmallVesselStroke | order. Victivallales. id. 2254      | Inverse variance weighted | 3 | -0.0543 | 0.1569 | 0.7294 | 0.2400  | 0.2700 | 0.5374 | 1.7959 | 0.1802 | 21.3298  |
| SmallVesselStroke | order. Victivallales. id. 2254      | Simple mode               | 3 | -0.2220 | 0.2163 | 0.4126 | 0.2400  | 0.2700 | 0.5374 | 1.7959 | 0.1802 | 21.3298  |
| SmallVesselStroke | order. Victivallales. id. 2254      | Weighted mode             | 3 | -0.2220 | 0.2267 | 0.4306 | 0.2400  | 0.2700 | 0.5374 | 1.7959 | 0.1802 | 21.3298  |
| SmallVesselStroke | phylum. Actinobacteria. id. 400     | MR Egger                  | 3 | -0.3068 | 0.5460 | 0.6741 | 0.0579  | 0.1008 | 0.6680 | 0.0906 | 0.7634 | 164.9139 |
| SmallVesselStroke | phylum. Actinobacteria. id. 400     | Weighted median           | 3 | 0.0154  | 0.0742 | 0.8358 | 0.0579  | 0.1008 | 0.6680 | 0.0906 | 0.7634 | 164.9139 |
| SmallVesselStroke | phylum. Actinobacteria. id. 400     | Inverse variance weighted | 3 | 0.0048  | 0.0626 | 0.9386 | 0.0579  | 0.1008 | 0.6680 | 0.0906 | 0.7634 | 164.9139 |
| SmallVesselStroke | phylum. Actinobacteria. id. 400     | Simple mode               | 3 | 0.0273  | 0.0863 | 0.7817 | 0.0579  | 0.1008 | 0.6680 | 0.0906 | 0.7634 | 164.9139 |
| SmallVesselStroke | phylum. Actinobacteria. id. 400     | Weighted mode             | 3 | 0.0254  | 0.0868 | 0.7971 | 0.0579  | 0.1008 | 0.6680 | 0.0906 | 0.7634 | 164.9139 |
| SmallVesselStroke | phylum. Bacteroidetes. id. 905      | MR Egger                  | 3 | 0.1528  | 0.5449 | 0.8260 | -0.0180 | 0.1006 | 0.8875 | 0.8129 | 0.3673 | 84.8093  |
| SmallVesselStroke | phylum. Bacteroidetes. id. 905      | Weighted median           | 3 | 0.0850  | 0.0753 | 0.2587 | -0.0180 | 0.1006 | 0.8875 | 0.8129 | 0.3673 | 84.8093  |
| SmallVesselStroke | phylum. Bacteroidetes. id. 905      | Inverse variance weighted | 3 | 0.0561  | 0.0623 | 0.3681 | -0.0180 | 0.1006 | 0.8875 | 0.8129 | 0.3673 | 84.8093  |
| SmallVesselStroke | phylum. Bacteroidetes. id. 905      | Simple mode               | 3 | 0.0940  | 0.0899 | 0.4056 | -0.0180 | 0.1006 | 0.8875 | 0.8129 | 0.3673 | 84.8093  |
| SmallVesselStroke | phylum. Bacteroidetes. id. 905      | Weighted mode             | 3 | 0.0951  | 0.0941 | 0.4188 | -0.0180 | 0.1006 | 0.8875 | 0.8129 | 0.3673 | 84.8093  |
| SmallVesselStroke | phylum. Cyanobacteria. id. 1500     | MR Egger                  | 3 | 0.5797  | 0.8690 | 0.6255 | -0.1410 | 0.1604 | 0.5410 | 0.6052 | 0.4366 | 28.6845  |
| SmallVesselStroke | phylum. Cyanobacteria. id. 1500     | Weighted median           | 3 | -0.1216 | 0.1295 | 0.3477 | -0.1410 | 0.1604 | 0.5410 | 0.6052 | 0.4366 | 28.6845  |
| SmallVesselStroke | phylum. Cyanobacteria. id. 1500     | Inverse variance weighted | 3 | -0.1792 | 0.0987 | 0.0696 | -0.1410 | 0.1604 | 0.5410 | 0.6052 | 0.4366 | 28.6845  |
| SmallVesselStroke | phylum. Cyanobacteria. id. 1500     | Simple mode               | 3 | -0.0936 | 0.1431 | 0.5800 | -0.1410 | 0.1604 | 0.5410 | 0.6052 | 0.4366 | 28.6845  |
| SmallVesselStroke | phylum. Cyanobacteria. id. 1500     | Weighted mode             | 3 | -0.0936 | 0.1473 | 0.5901 | -0.1410 | 0.1604 | 0.5410 | 0.6052 | 0.4366 | 28.6845  |
| SmallVesselStroke | phylum. Euryarchaeota. id. 55       | Inverse variance weighted | 2 | -0.0730 | 0.1632 | 0.6544 | NA      | NA     | NA     | 0.0109 | 0.9168 | 65.3271  |
| SmallVesselStroke | phylum. Firmicutes. id. 1672        | MR Egger                  | 3 | -0.2062 | 0.7762 | 0.8347 | 0.0234  | 0.1433 | 0.8971 | 2.0278 | 0.1544 | 52.4463  |
| SmallVesselStroke | phylum. Firmicutes. id. 1672        | Weighted median           | 3 | -0.1212 | 0.0803 | 0.1314 | 0.0234  | 0.1433 | 0.8971 | 2.0278 | 0.1544 | 52.4463  |
| SmallVesselStroke | phylum. Firmicutes. id. 1672        | Inverse variance weighted | 3 | -0.0805 | 0.0636 | 0.2058 | 0.0234  | 0.1433 | 0.8971 | 2.0278 | 0.1544 | 52.4463  |
| SmallVesselStroke | phylum. Firmicutes. id. 1672        | Simple mode               | 3 | -0.1399 | 0.1024 | 0.3054 | 0.0234  | 0.1433 | 0.8971 | 2.0278 | 0.1544 | 52.4463  |
| SmallVesselStroke | phylum. Firmicutes. id. 1672        | Weighted mode             | 3 | -0.1408 | 0.1122 | 0.3364 | 0.0234  | 0.1433 | 0.8971 | 2.0278 | 0.1544 | 52.4463  |
| SmallVesselStroke | phylum. Lentisphaerae. id. 2238     | MR Egger                  | 3 | -1.4349 | 1.6239 | 0.5393 | 0.2577  | 0.2993 | 0.5475 | 2.2095 | 0.1372 | 19.4778  |
| SmallVesselStroke | phylum. Lentisphaerae. id. 2238     | Weighted median           | 3 | -0.1772 | 0.1656 | 0.2847 | 0.2577  | 0.2993 | 0.5475 | 2.2095 | 0.1372 | 19.4778  |
| SmallVesselStroke | phylum. Lentisphaerae. id. 2238     | Inverse variance weighted | 3 | -0.0460 | 0.1715 | 0.7884 | 0.2577  | 0.2993 | 0.5475 | 2.2095 | 0.1372 | 19.4778  |
| SmallVesselStroke | phylum. Lentisphaerae. id. 2238     | Simple mode               | 3 | -0.2305 | 0.2294 | 0.4208 | 0.2577  | 0.2993 | 0.5475 | 2.2095 | 0.1372 | 19.4778  |
| SmallVesselStroke | phylum. Lentisphaerae. id. 2238     | Weighted mode             | 3 | -0.2291 | 0.2292 | 0.4227 | 0.2577  | 0.2993 | 0.5475 | 2.2095 | 0.1372 | 19.4778  |
| SmallVesselStroke | phylum. Proteobacteria. id. 2375    | MR Egger                  | 3 | -0.3564 | 0.5466 | 0.6321 | 0.0545  | 0.1009 | 0.6848 | 0.3189 | 0.8526 | 80.2172  |
| SmallVesselStroke | phylum. Proteobacteria. id. 2375    | Weighted median           | 3 | -0.0456 | 0.0780 | 0.5588 | 0.0545  | 0.1009 | 0.6848 | 0.3189 | 0.8526 | 80.2172  |
| SmallVesselStroke | phylum. Proteobacteria. id. 2375    | Inverse variance weighted | 3 | -0.0632 | 0.0625 | 0.3122 | 0.0545  | 0.1009 | 0.6848 | 0.3189 | 0.8526 | 80.2172  |
| SmallVesselStroke | phylum. Proteobacteria. id. 2375    | Simple mode               | 3 | -0.0393 | 0.0868 | 0.6953 | 0.0545  | 0.1009 | 0.6848 | 0.3189 | 0.8526 | 80.2172  |
| SmallVesselStroke | phylum. Proteobacteria. id. 2375    | Weighted mode             | 3 | -0.0399 | 0.0917 | 0.7056 | 0.0545  | 0.1009 | 0.6848 | 0.3189 | 0.8526 | 80.2172  |
| SmallVesselStroke | phylum. Tenericutes. id. 3919       | MR Egger                  | 3 | 0.5609  | 0.6785 | 0.5602 | -0.0901 | 0.1254 | 0.6035 | 0.5036 | 0.4779 | 49.2968  |
| SmallVesselStroke | phylum. Tenericutes. id. 3919       | Weighted median           | 3 | 0.0840  | 0.0945 | 0.3739 | -0.0901 | 0.1254 | 0.6035 | 0.5036 | 0.4779 | 49.2968  |
| SmallVesselStroke | phylum. Tenericutes. id. 3919       | Inverse variance weighted | 3 | 0.0768  | 0.0779 | 0.3243 | -0.0901 | 0.1254 | 0.6035 | 0.5036 | 0.4779 | 49.2968  |
| SmallVesselStroke | phylum. Tenericutes. id. 3919       | Simple mode               | 3 | 0.1096  | 0.1196 | 0.4560 | -0.0901 | 0.1254 | 0.6035 | 0.5036 | 0.4779 | 49.2968  |
| SmallVesselStroke | phylum. Tenericutes. id. 3919       | Weighted mode             | 3 | 0.1011  | 0.1174 | 0.4797 | -0.0901 | 0.1254 | 0.6035 | 0.5036 | 0.4779 | 49.2968  |
| SmallVesselStroke | phylum. Verrucomicrobia. id. 3982   | MR Egger                  | 3 | 0.6949  | 0.6506 | 0.4791 | -0.1144 | 0.1202 | 0.5157 | 0.9336 | 0.6270 | 47.8135  |

|                   |                                   |                           |    |         |        |        |         |        |        |         |        |         |
|-------------------|-----------------------------------|---------------------------|----|---------|--------|--------|---------|--------|--------|---------|--------|---------|
| SmallVesselStroke | phylum.Verrucomicrobia.id.3982    | Weighted median           | 3  | 0.0557  | 0.0917 | 0.5435 | -0.1144 | 0.1202 | 0.5157 | 0.9336  | 0.6270 | 47.8135 |
| SmallVesselStroke | phylum.Verrucomicrobia.id.3982    | Inverse variance weighted | 3  | 0.0796  | 0.0745 | 0.2854 | -0.1144 | 0.1202 | 0.5157 | 0.9336  | 0.6270 | 47.8135 |
| SmallVesselStroke | phylum.Verrucomicrobia.id.3982    | Simple mode               | 3  | 0.0391  | 0.1117 | 0.7595 | -0.1144 | 0.1202 | 0.5157 | 0.9336  | 0.6270 | 47.8135 |
| SmallVesselStroke | phylum.Verrucomicrobia.id.3982    | Weighted mode             | 3  | 0.0351  | 0.1047 | 0.7693 | -0.1144 | 0.1202 | 0.5157 | 0.9336  | 0.6270 | 47.8135 |
| Stroke            | class.Actinobacteria.id.419       | MR Egger                  | 19 | 0.3245  | 0.4365 | 0.4674 | -0.0168 | 0.0232 | 0.4772 | 32.5926 | 0.0127 | 5.7750  |
| Stroke            | class.Actinobacteria.id.419       | Weighted median           | 19 | 0.0232  | 0.0932 | 0.8031 | -0.0168 | 0.0232 | 0.4772 | 32.5926 | 0.0127 | 5.7750  |
| Stroke            | class.Actinobacteria.id.419       | Inverse variance weighted | 19 | 0.0142  | 0.0900 | 0.8742 | -0.0168 | 0.0232 | 0.4772 | 32.5926 | 0.0127 | 5.7750  |
| Stroke            | class.Actinobacteria.id.419       | Simple mode               | 19 | 0.0601  | 0.1604 | 0.7121 | -0.0168 | 0.0232 | 0.4772 | 32.5926 | 0.0127 | 5.7750  |
| Stroke            | class.Actinobacteria.id.419       | Weighted mode             | 19 | 0.0387  | 0.1317 | 0.7723 | -0.0168 | 0.0232 | 0.4772 | 32.5926 | 0.0127 | 5.7750  |
| Stroke            | class.Alphaproteobacteria.id.2379 | MR Egger                  | 19 | 0.1147  | 0.4105 | 0.7833 | -0.0090 | 0.0218 | 0.6843 | 13.1921 | 0.7232 | 8.1171  |
| Stroke            | class.Alphaproteobacteria.id.2379 | Weighted median           | 19 | -0.0389 | 0.1230 | 0.7517 | -0.0090 | 0.0218 | 0.6843 | 13.1921 | 0.7232 | 8.1171  |
| Stroke            | class.Alphaproteobacteria.id.2379 | Inverse variance weighted | 19 | -0.0514 | 0.0850 | 0.5452 | -0.0090 | 0.0218 | 0.6843 | 13.1921 | 0.7232 | 8.1171  |
| Stroke            | class.Alphaproteobacteria.id.2379 | Simple mode               | 19 | 0.0682  | 0.2203 | 0.7605 | -0.0090 | 0.0218 | 0.6843 | 13.1921 | 0.7232 | 8.1171  |
| Stroke            | class.Alphaproteobacteria.id.2379 | Weighted mode             | 19 | 0.0816  | 0.2151 | 0.7089 | -0.0090 | 0.0218 | 0.6843 | 13.1921 | 0.7232 | 8.1171  |
| Stroke            | class.Bacilli.id.1673             | MR Egger                  | 19 | 0.4324  | 0.3067 | 0.1766 | -0.0257 | 0.0163 | 0.1324 | 17.5451 | 0.4860 | 12.8735 |
| Stroke            | class.Bacilli.id.1673             | Weighted median           | 19 | -0.1160 | 0.0913 | 0.2039 | -0.0257 | 0.0163 | 0.1324 | 17.5451 | 0.4860 | 12.8735 |
| Stroke            | class.Bacilli.id.1673             | Inverse variance weighted | 19 | -0.0417 | 0.0638 | 0.5136 | -0.0257 | 0.0163 | 0.1324 | 17.5451 | 0.4860 | 12.8735 |
| Stroke            | class.Bacilli.id.1673             | Simple mode               | 19 | -0.2214 | 0.1773 | 0.2276 | -0.0257 | 0.0163 | 0.1324 | 17.5451 | 0.4860 | 12.8735 |
| Stroke            | class.Bacilli.id.1673             | Weighted mode             | 19 | -0.1751 | 0.1549 | 0.2731 | -0.0257 | 0.0163 | 0.1324 | 17.5451 | 0.4860 | 12.8735 |
| Stroke            | class.Bacteroidia.id.912          | MR Egger                  | 19 | 0.2165  | 0.3153 | 0.5016 | -0.0071 | 0.0167 | 0.6776 | 19.0100 | 0.3280 | 9.1115  |
| Stroke            | class.Bacteroidia.id.912          | Weighted median           | 19 | 0.1271  | 0.0923 | 0.1683 | -0.0071 | 0.0167 | 0.6776 | 19.0100 | 0.3280 | 9.1115  |
| Stroke            | class.Bacteroidia.id.912          | Inverse variance weighted | 19 | 0.0861  | 0.0642 | 0.1801 | -0.0071 | 0.0167 | 0.6776 | 19.0100 | 0.3280 | 9.1115  |
| Stroke            | class.Bacteroidia.id.912          | Simple mode               | 19 | -0.0054 | 0.1566 | 0.9728 | -0.0071 | 0.0167 | 0.6776 | 19.0100 | 0.3280 | 9.1115  |
| Stroke            | class.Bacteroidia.id.912          | Weighted mode             | 19 | -0.0165 | 0.1382 | 0.9064 | -0.0071 | 0.0167 | 0.6776 | 19.0100 | 0.3280 | 9.1115  |
| Stroke            | class.Betaproteobacteria.id.2867  | MR Egger                  | 19 | -0.4548 | 0.3082 | 0.1584 | 0.0262  | 0.0164 | 0.1273 | 17.7844 | 0.4699 | 10.9936 |
| Stroke            | class.Betaproteobacteria.id.2867  | Weighted median           | 19 | 0.0676  | 0.0891 | 0.4483 | 0.0262  | 0.0164 | 0.1273 | 17.7844 | 0.4699 | 10.9936 |
| Stroke            | class.Betaproteobacteria.id.2867  | Inverse variance weighted | 19 | 0.0285  | 0.0643 | 0.6575 | 0.0262  | 0.0164 | 0.1273 | 17.7844 | 0.4699 | 10.9936 |
| Stroke            | class.Betaproteobacteria.id.2867  | Simple mode               | 19 | 0.1880  | 0.1641 | 0.2670 | 0.0262  | 0.0164 | 0.1273 | 17.7844 | 0.4699 | 10.9936 |
| Stroke            | class.Betaproteobacteria.id.2867  | Weighted mode             | 19 | 0.1063  | 0.1550 | 0.5017 | 0.0262  | 0.0164 | 0.1273 | 17.7844 | 0.4699 | 10.9936 |
| Stroke            | class.Clostridia.id.1859          | MR Egger                  | 19 | -0.0685 | 0.2982 | 0.8209 | -0.0013 | 0.0158 | 0.9373 | 12.7695 | 0.7515 | 10.5595 |
| Stroke            | class.Clostridia.id.1859          | Weighted median           | 19 | -0.1726 | 0.0871 | 0.0476 | -0.0013 | 0.0158 | 0.9373 | 12.7695 | 0.7515 | 10.5595 |
| Stroke            | class.Clostridia.id.1859          | Inverse variance weighted | 19 | -0.0918 | 0.0621 | 0.1394 | -0.0013 | 0.0158 | 0.9373 | 12.7695 | 0.7515 | 10.5595 |
| Stroke            | class.Clostridia.id.1859          | Simple mode               | 19 | -0.2283 | 0.1501 | 0.1457 | -0.0013 | 0.0158 | 0.9373 | 12.7695 | 0.7515 | 10.5595 |
| Stroke            | class.Clostridia.id.1859          | Weighted mode             | 19 | -0.2283 | 0.1327 | 0.1024 | -0.0013 | 0.0158 | 0.9373 | 12.7695 | 0.7515 | 10.5595 |
| Stroke            | class.Coriobacteriia.id.809       | MR Egger                  | 19 | -0.0539 | 0.3028 | 0.8609 | 0.0029  | 0.0161 | 0.8609 | 13.3012 | 0.7158 | 15.7571 |
| Stroke            | class.Coriobacteriia.id.809       | Weighted median           | 19 | -0.0099 | 0.0864 | 0.9090 | 0.0029  | 0.0161 | 0.8609 | 13.3012 | 0.7158 | 15.7571 |
| Stroke            | class.Coriobacteriia.id.809       | Inverse variance weighted | 19 | -0.0012 | 0.0632 | 0.9851 | 0.0029  | 0.0161 | 0.8609 | 13.3012 | 0.7158 | 15.7571 |
| Stroke            | class.Coriobacteriia.id.809       | Simple mode               | 19 | -0.0370 | 0.1352 | 0.7877 | 0.0029  | 0.0161 | 0.8609 | 13.3012 | 0.7158 | 15.7571 |
| Stroke            | class.Coriobacteriia.id.809       | Weighted mode             | 19 | -0.0175 | 0.1253 | 0.8903 | 0.0029  | 0.0161 | 0.8609 | 13.3012 | 0.7158 | 15.7571 |
| Stroke            | class.Deltaproteobacteria.id.3087 | MR Egger                  | 19 | -0.2687 | 0.3363 | 0.4354 | 0.0129  | 0.0178 | 0.4803 | 17.9015 | 0.3951 | 10.9652 |
| Stroke            | class.Deltaproteobacteria.id.3087 | Weighted median           | 19 | -0.1028 | 0.0989 | 0.2988 | 0.0129  | 0.0178 | 0.4803 | 17.9015 | 0.3951 | 10.9652 |
| Stroke            | class.Deltaproteobacteria.id.3087 | Inverse variance weighted | 19 | -0.0313 | 0.0691 | 0.6506 | 0.0129  | 0.0178 | 0.4803 | 17.9015 | 0.3951 | 10.9652 |
| Stroke            | class.Deltaproteobacteria.id.3087 | Simple mode               | 19 | -0.1927 | 0.1968 | 0.3404 | 0.0129  | 0.0178 | 0.4803 | 17.9015 | 0.3951 | 10.9652 |
| Stroke            | class.Deltaproteobacteria.id.3087 | Weighted mode             | 19 | -0.2079 | 0.1675 | 0.2307 | 0.0129  | 0.0178 | 0.4803 | 17.9015 | 0.3951 | 10.9652 |
| Stroke            | class.Erysipelotrichia.id.2147    | MR Egger                  | 19 | 0.0701  | 0.4255 | 0.8710 | -0.0023 | 0.0226 | 0.9194 | 34.4011 | 0.0074 | 7.3529  |
| Stroke            | class.Erysipelotrichia.id.2147    | Weighted median           | 19 | 0.0805  | 0.1000 | 0.4207 | -0.0023 | 0.0226 | 0.9194 | 34.4011 | 0.0074 | 7.3529  |
| Stroke            | class.Erysipelotrichia.id.2147    | Inverse variance weighted | 19 | 0.0274  | 0.0862 | 0.7506 | -0.0023 | 0.0226 | 0.9194 | 34.4011 | 0.0074 | 7.3529  |
| Stroke            | class.Erysipelotrichia.id.2147    | Simple mode               | 19 | 0.1713  | 0.2148 | 0.4354 | -0.0023 | 0.0226 | 0.9194 | 34.4011 | 0.0074 | 7.3529  |
| Stroke            | class.Erysipelotrichia.id.2147    | Weighted mode             | 19 | 0.1464  | 0.1759 | 0.4160 | -0.0023 | 0.0226 | 0.9194 | 34.4011 | 0.0074 | 7.3529  |
| Stroke            | class.Gammaproteobacteria.id.3303 | MR Egger                  | 19 | -0.2674 | 0.3198 | 0.4146 | 0.0160  | 0.0170 | 0.3583 | 11.6496 | 0.8648 | 14.0655 |
| Stroke            | class.Gammaproteobacteria.id.3303 | Weighted median           | 19 | -0.0261 | 0.0955 | 0.7849 | 0.0160  | 0.0170 | 0.3583 | 11.6496 | 0.8648 | 14.0655 |
| Stroke            | class.Gammaproteobacteria.id.3303 | Inverse variance weighted | 19 | 0.0279  | 0.0666 | 0.6756 | 0.0160  | 0.0170 | 0.3583 | 11.6496 | 0.8648 | 14.0655 |
| Stroke            | class.Gammaproteobacteria.id.3303 | Simple mode               | 19 | -0.0819 | 0.1692 | 0.6342 | 0.0160  | 0.0170 | 0.3583 | 11.6496 | 0.8648 | 14.0655 |
| Stroke            | class.Gammaproteobacteria.id.3303 | Weighted mode             | 19 | -0.1006 | 0.1799 | 0.5829 | 0.0160  | 0.0170 | 0.3583 | 11.6496 | 0.8648 | 14.0655 |
| Stroke            | class.Lentisphaeria.id.2250       | MR Egger                  | 18 | -0.1776 | 0.7871 | 0.8243 | 0.0013  | 0.0415 | 0.9763 | 26.5213 | 0.0471 | 2.6082  |
| Stroke            | class.Lentisphaeria.id.2250       | Weighted median           | 18 | -0.1277 | 0.1924 | 0.5068 | 0.0013  | 0.0415 | 0.9763 | 26.5213 | 0.0471 | 2.6082  |
| Stroke            | class.Lentisphaeria.id.2250       | Inverse variance weighted | 18 | -0.1544 | 0.1531 | 0.3135 | 0.0013  | 0.0415 | 0.9763 | 26.5213 | 0.0471 | 2.6082  |
| Stroke            | class.Lentisphaeria.id.2250       | Simple mode               | 18 | -0.3864 | 0.3434 | 0.2762 | 0.0013  | 0.0415 | 0.9763 | 26.5213 | 0.0471 | 2.6082  |

|        |                                         |                           |    |         |        |        |         |        |        |         |        |         |
|--------|-----------------------------------------|---------------------------|----|---------|--------|--------|---------|--------|--------|---------|--------|---------|
| Stroke | class.Lentisphaeria.id.2250             | Weighted mode             | 18 | -0.2116 | 0.2996 | 0.4896 | 0.0013  | 0.0415 | 0.9763 | 26.5213 | 0.0471 | 2.6082  |
| Stroke | class.Melainabacteria.id.1589           | MR Egger                  | 18 | -0.6652 | 0.5476 | 0.2421 | 0.0299  | 0.0289 | 0.3158 | 15.4459 | 0.5634 | 4.7942  |
| Stroke | class.Melainabacteria.id.1589           | Weighted median           | 18 | -0.1413 | 0.1543 | 0.3596 | 0.0299  | 0.0289 | 0.3158 | 15.4459 | 0.5634 | 4.7942  |
| Stroke | class.Melainabacteria.id.1589           | Inverse variance weighted | 18 | -0.1096 | 0.1097 | 0.3177 | 0.0299  | 0.0289 | 0.3158 | 15.4459 | 0.5634 | 4.7942  |
| Stroke | class.Melainabacteria.id.1589           | Simple mode               | 18 | 0.3617  | 0.3109 | 0.2607 | 0.0299  | 0.0289 | 0.3158 | 15.4459 | 0.5634 | 4.7942  |
| Stroke | class.Melainabacteria.id.1589           | Weighted mode             | 18 | -0.3566 | 0.2646 | 0.1954 | 0.0299  | 0.0289 | 0.3158 | 15.4459 | 0.5634 | 4.7942  |
| Stroke | class.Methanobacteria.id.119            | MR Egger                  | 18 | 1.0529  | 0.6950 | 0.1493 | -0.0555 | 0.0366 | 0.1487 | 9.5238  | 0.9224 | 5.6058  |
| Stroke | class.Methanobacteria.id.119            | Weighted median           | 18 | 0.0345  | 0.1860 | 0.8529 | -0.0555 | 0.0366 | 0.1487 | 9.5238  | 0.9224 | 5.6058  |
| Stroke | class.Methanobacteria.id.119            | Inverse variance weighted | 18 | 0.0194  | 0.1386 | 0.8885 | -0.0555 | 0.0366 | 0.1487 | 9.5238  | 0.9224 | 5.6058  |
| Stroke | class.Methanobacteria.id.119            | Simple mode               | 18 | 0.0956  | 0.3138 | 0.7644 | -0.0555 | 0.0366 | 0.1487 | 9.5238  | 0.9224 | 5.6058  |
| Stroke | class.Methanobacteria.id.119            | Weighted mode             | 18 | 0.0836  | 0.2800 | 0.7690 | -0.0555 | 0.0366 | 0.1487 | 9.5238  | 0.9224 | 5.6058  |
| Stroke | class.Mollicutes.id.3920                | MR Egger                  | 19 | -0.1040 | 0.4100 | 0.8027 | 0.0012  | 0.0217 | 0.9555 | 19.8538 | 0.2818 | 7.2889  |
| Stroke | class.Mollicutes.id.3920                | Weighted median           | 19 | -0.0396 | 0.1107 | 0.7205 | 0.0012  | 0.0217 | 0.9555 | 19.8538 | 0.2818 | 7.2889  |
| Stroke | class.Mollicutes.id.3920                | Inverse variance weighted | 19 | -0.0813 | 0.0825 | 0.3244 | 0.0012  | 0.0217 | 0.9555 | 19.8538 | 0.2818 | 7.2889  |
| Stroke | class.Mollicutes.id.3920                | Simple mode               | 19 | -0.0528 | 0.1848 | 0.7783 | 0.0012  | 0.0217 | 0.9555 | 19.8538 | 0.2818 | 7.2889  |
| Stroke | class.Mollicutes.id.3920                | Weighted mode             | 19 | -0.0483 | 0.2027 | 0.8146 | 0.0012  | 0.0217 | 0.9555 | 19.8538 | 0.2818 | 7.2889  |
| Stroke | class.Negativicutes.id.2164             | MR Egger                  | 19 | -0.1691 | 0.2995 | 0.5797 | 0.0081  | 0.0159 | 0.6178 | 9.5984  | 0.9196 | 19.0638 |
| Stroke | class.Negativicutes.id.2164             | Weighted median           | 19 | -0.0458 | 0.0842 | 0.5867 | 0.0081  | 0.0159 | 0.6178 | 9.5984  | 0.9196 | 19.0638 |
| Stroke | class.Negativicutes.id.2164             | Inverse variance weighted | 19 | -0.0202 | 0.0624 | 0.7459 | 0.0081  | 0.0159 | 0.6178 | 9.5984  | 0.9196 | 19.0638 |
| Stroke | class.Negativicutes.id.2164             | Simple mode               | 19 | -0.0389 | 0.1464 | 0.7933 | 0.0081  | 0.0159 | 0.6178 | 9.5984  | 0.9196 | 19.0638 |
| Stroke | class.Negativicutes.id.2164             | Weighted mode             | 19 | -0.0782 | 0.1314 | 0.5589 | 0.0081  | 0.0159 | 0.6178 | 9.5984  | 0.9196 | 19.0638 |
| Stroke | class.Verrucomicrobiae.id.4029          | MR Egger                  | 19 | -0.0223 | 0.3853 | 0.9545 | 0.0053  | 0.0204 | 0.7974 | 18.6035 | 0.3518 | 7.2587  |
| Stroke | class.Verrucomicrobiae.id.4029          | Weighted median           | 19 | 0.0510  | 0.1084 | 0.6377 | 0.0053  | 0.0204 | 0.7974 | 18.6035 | 0.3518 | 7.2587  |
| Stroke | class.Verrucomicrobiae.id.4029          | Inverse variance weighted | 19 | 0.0759  | 0.0782 | 0.3313 | 0.0053  | 0.0204 | 0.7974 | 18.6035 | 0.3518 | 7.2587  |
| Stroke | class.Verrucomicrobiae.id.4029          | Simple mode               | 19 | 0.2090  | 0.2231 | 0.3613 | 0.0053  | 0.0204 | 0.7974 | 18.6035 | 0.3518 | 7.2587  |
| Stroke | class.Verrucomicrobiae.id.4029          | Weighted mode             | 19 | 0.0802  | 0.1760 | 0.6540 | 0.0053  | 0.0204 | 0.7974 | 18.6035 | 0.3518 | 7.2587  |
| Stroke | family.Acidaminococcaceae.id.2166       | MR Egger                  | 19 | -0.4391 | 0.3620 | 0.2417 | 0.0257  | 0.0192 | 0.1989 | 11.9032 | 0.8522 | 8.1936  |
| Stroke | family.Acidaminococcaceae.id.2166       | Weighted median           | 19 | 0.0645  | 0.1017 | 0.5258 | 0.0257  | 0.0192 | 0.1989 | 11.9032 | 0.8522 | 8.1936  |
| Stroke | family.Acidaminococcaceae.id.2166       | Inverse variance weighted | 19 | 0.0342  | 0.0753 | 0.6500 | 0.0257  | 0.0192 | 0.1989 | 11.9032 | 0.8522 | 8.1936  |
| Stroke | family.Acidaminococcaceae.id.2166       | Simple mode               | 19 | 0.0245  | 0.1795 | 0.8931 | 0.0257  | 0.0192 | 0.1989 | 11.9032 | 0.8522 | 8.1936  |
| Stroke | family.Acidaminococcaceae.id.2166       | Weighted mode             | 19 | 0.0893  | 0.1572 | 0.5773 | 0.0257  | 0.0192 | 0.1989 | 11.9032 | 0.8522 | 8.1936  |
| Stroke | family.Actinomycetaceae.id.421          | MR Egger                  | 18 | 0.0044  | 0.4817 | 0.9929 | -0.0064 | 0.0253 | 0.8033 | 16.3259 | 0.4305 | 6.0043  |
| Stroke | family.Actinomycetaceae.id.421          | Weighted median           | 18 | -0.0449 | 0.1330 | 0.7357 | -0.0064 | 0.0253 | 0.8033 | 16.3259 | 0.4305 | 6.0043  |
| Stroke | family.Actinomycetaceae.id.421          | Inverse variance weighted | 18 | -0.1151 | 0.0959 | 0.2299 | -0.0064 | 0.0253 | 0.8033 | 16.3259 | 0.4305 | 6.0043  |
| Stroke | family.Actinomycetaceae.id.421          | Simple mode               | 18 | -0.0456 | 0.2117 | 0.8320 | -0.0064 | 0.0253 | 0.8033 | 16.3259 | 0.4305 | 6.0043  |
| Stroke | family.Actinomycetaceae.id.421          | Weighted mode             | 18 | -0.0346 | 0.1983 | 0.8636 | -0.0064 | 0.0253 | 0.8033 | 16.3259 | 0.4305 | 6.0043  |
| Stroke | family.Alcaligenaceae.id.2875           | MR Egger                  | 19 | -0.4556 | 0.3112 | 0.1615 | 0.0286  | 0.0165 | 0.1018 | 16.3188 | 0.5703 | 10.7595 |
| Stroke | family.Alcaligenaceae.id.2875           | Weighted median           | 19 | 0.0971  | 0.0925 | 0.2941 | 0.0286  | 0.0165 | 0.1018 | 16.3188 | 0.5703 | 10.7595 |
| Stroke | family.Alcaligenaceae.id.2875           | Inverse variance weighted | 19 | 0.0709  | 0.0649 | 0.2743 | 0.0286  | 0.0165 | 0.1018 | 16.3188 | 0.5703 | 10.7595 |
| Stroke | family.Alcaligenaceae.id.2875           | Simple mode               | 19 | 0.2368  | 0.1796 | 0.2038 | 0.0286  | 0.0165 | 0.1018 | 16.3188 | 0.5703 | 10.7595 |
| Stroke | family.Alcaligenaceae.id.2875           | Weighted mode             | 19 | 0.2159  | 0.1676 | 0.2138 | 0.0286  | 0.0165 | 0.1018 | 16.3188 | 0.5703 | 10.7595 |
| Stroke | family.Bacteroidaceae.id.917            | MR Egger                  | 19 | 0.0220  | 0.3672 | 0.9530 | 0.0022  | 0.0195 | 0.9121 | 25.7463 | 0.0792 | 8.9414  |
| Stroke | family.Bacteroidaceae.id.917            | Weighted median           | 19 | 0.0921  | 0.0924 | 0.3188 | 0.0022  | 0.0195 | 0.9121 | 25.7463 | 0.0792 | 8.9414  |
| Stroke | family.Bacteroidaceae.id.917            | Inverse variance weighted | 19 | 0.0622  | 0.0744 | 0.4033 | 0.0022  | 0.0195 | 0.9121 | 25.7463 | 0.0792 | 8.9414  |
| Stroke | family.Bacteroidaceae.id.917            | Simple mode               | 19 | 0.0987  | 0.1747 | 0.5789 | 0.0022  | 0.0195 | 0.9121 | 25.7463 | 0.0792 | 8.9414  |
| Stroke | family.Bacteroidaceae.id.917            | Weighted mode             | 19 | 0.0899  | 0.1739 | 0.6116 | 0.0022  | 0.0195 | 0.9121 | 25.7463 | 0.0792 | 8.9414  |
| Stroke | family.BacteroidalesS24.7group.id.11173 | MR Egger                  | 18 | 0.1712  | 0.4725 | 0.7219 | -0.0104 | 0.0249 | 0.6824 | 10.3247 | 0.8491 | 9.6563  |
| Stroke | family.BacteroidalesS24.7group.id.11173 | Weighted median           | 18 | 0.0045  | 0.1233 | 0.9708 | -0.0104 | 0.0249 | 0.6824 | 10.3247 | 0.8491 | 9.6563  |
| Stroke | family.BacteroidalesS24.7group.id.11173 | Inverse variance weighted | 18 | -0.0217 | 0.0951 | 0.8198 | -0.0104 | 0.0249 | 0.6824 | 10.3247 | 0.8491 | 9.6563  |
| Stroke | family.BacteroidalesS24.7group.id.11173 | Simple mode               | 18 | -0.0626 | 0.2111 | 0.7704 | -0.0104 | 0.0249 | 0.6824 | 10.3247 | 0.8491 | 9.6563  |
| Stroke | family.BacteroidalesS24.7group.id.11173 | Weighted mode             | 18 | -0.0284 | 0.2039 | 0.8909 | -0.0104 | 0.0249 | 0.6824 | 10.3247 | 0.8491 | 9.6563  |
| Stroke | family.Bifidobacteriaceae.id.433        | MR Egger                  | 19 | 0.4560  | 0.4279 | 0.3014 | -0.0255 | 0.0227 | 0.2779 | 30.8557 | 0.0299 | 5.5498  |
| Stroke | family.Bifidobacteriaceae.id.433        | Weighted median           | 19 | 0.0710  | 0.1005 | 0.4800 | -0.0255 | 0.0227 | 0.2779 | 30.8557 | 0.0299 | 5.5498  |
| Stroke | family.Bifidobacteriaceae.id.433        | Inverse variance weighted | 19 | -0.0129 | 0.0902 | 0.8861 | -0.0255 | 0.0227 | 0.2779 | 30.8557 | 0.0299 | 5.5498  |
| Stroke | family.Bifidobacteriaceae.id.433        | Simple mode               | 19 | 0.0397  | 0.1553 | 0.8010 | -0.0255 | 0.0227 | 0.2779 | 30.8557 | 0.0299 | 5.5498  |
| Stroke | family.Bifidobacteriaceae.id.433        | Weighted mode             | 19 | 0.0565  | 0.1285 | 0.6655 | -0.0255 | 0.0227 | 0.2779 | 30.8557 | 0.0299 | 5.5498  |
| Stroke | family.Christensenellaceae.id.1866      | MR Egger                  | 19 | 0.2239  | 0.3109 | 0.4811 | -0.0140 | 0.0165 | 0.4061 | 9.4774  | 0.9241 | 16.0721 |
| Stroke | family.Christensenellaceae.id.1866      | Weighted median           | 19 | -0.0507 | 0.0872 | 0.5610 | -0.0140 | 0.0165 | 0.4061 | 9.4774  | 0.9241 | 16.0721 |

|        |                                             |                           |    |         |        |        |         |        |        |         |        |         |
|--------|---------------------------------------------|---------------------------|----|---------|--------|--------|---------|--------|--------|---------|--------|---------|
| Stroke | family.Christensenellaceae.id.1866          | Inverse variance weighted | 19 | -0.0351 | 0.0647 | 0.5873 | -0.0140 | 0.0165 | 0.4061 | 9.4774  | 0.9241 | 16.0721 |
| Stroke | family.Christensenellaceae.id.1866          | Simple mode               | 19 | -0.0942 | 0.1605 | 0.5647 | -0.0140 | 0.0165 | 0.4061 | 9.4774  | 0.9241 | 16.0721 |
| Stroke | family.Christensenellaceae.id.1866          | Weighted mode             | 19 | -0.0855 | 0.1519 | 0.5807 | -0.0140 | 0.0165 | 0.4061 | 9.4774  | 0.9241 | 16.0721 |
| Stroke | family.Clostridiaceae1.id.1869              | MR Egger                  | 19 | 0.1723  | 0.4191 | 0.6862 | -0.0117 | 0.0222 | 0.6061 | 25.8743 | 0.0768 | 9.3923  |
| Stroke | family.Clostridiaceae1.id.1869              | Weighted median           | 19 | 0.0329  | 0.1107 | 0.7665 | -0.0117 | 0.0222 | 0.6061 | 25.8743 | 0.0768 | 9.3923  |
| Stroke | family.Clostridiaceae1.id.1869              | Inverse variance weighted | 19 | -0.0431 | 0.0852 | 0.6127 | -0.0117 | 0.0222 | 0.6061 | 25.8743 | 0.0768 | 9.3923  |
| Stroke | family.Clostridiaceae1.id.1869              | Simple mode               | 19 | 0.1649  | 0.2136 | 0.4501 | -0.0117 | 0.0222 | 0.6061 | 25.8743 | 0.0768 | 9.3923  |
| Stroke | family.Clostridiaceae1.id.1869              | Weighted mode             | 19 | 0.1194  | 0.1974 | 0.5530 | -0.0117 | 0.0222 | 0.6061 | 25.8743 | 0.0768 | 9.3923  |
| Stroke | family.ClostridialesvadinBB60group.id.11286 | MR Egger                  | 19 | 0.2371  | 0.3914 | 0.5527 | -0.0118 | 0.0208 | 0.5758 | 8.3443  | 0.9586 | 16.4045 |
| Stroke | family.ClostridialesvadinBB60group.id.11286 | Weighted median           | 19 | 0.0343  | 0.1054 | 0.7453 | -0.0118 | 0.0208 | 0.5758 | 8.3443  | 0.9586 | 16.4045 |
| Stroke | family.ClostridialesvadinBB60group.id.11286 | Inverse variance weighted | 19 | 0.0187  | 0.0815 | 0.8183 | -0.0118 | 0.0208 | 0.5758 | 8.3443  | 0.9586 | 16.4045 |
| Stroke | family.ClostridialesvadinBB60group.id.11286 | Simple mode               | 19 | 0.0595  | 0.1860 | 0.7529 | -0.0118 | 0.0208 | 0.5758 | 8.3443  | 0.9586 | 16.4045 |
| Stroke | family.ClostridialesvadinBB60group.id.11286 | Weighted mode             | 19 | 0.0695  | 0.1801 | 0.7040 | -0.0118 | 0.0208 | 0.5758 | 8.3443  | 0.9586 | 16.4045 |
| Stroke | family.Coriobacteriaceae.id.811             | MR Egger                  | 19 | -0.0539 | 0.3028 | 0.8609 | 0.0029  | 0.0161 | 0.8609 | 13.3012 | 0.7158 | 15.7571 |
| Stroke | family.Coriobacteriaceae.id.811             | Weighted median           | 19 | -0.0099 | 0.0825 | 0.9047 | 0.0029  | 0.0161 | 0.8609 | 13.3012 | 0.7158 | 15.7571 |
| Stroke | family.Coriobacteriaceae.id.811             | Inverse variance weighted | 19 | -0.0012 | 0.0632 | 0.9851 | 0.0029  | 0.0161 | 0.8609 | 13.3012 | 0.7158 | 15.7571 |
| Stroke | family.Coriobacteriaceae.id.811             | Simple mode               | 19 | -0.0370 | 0.1468 | 0.8041 | 0.0029  | 0.0161 | 0.8609 | 13.3012 | 0.7158 | 15.7571 |
| Stroke | family.Coriobacteriaceae.id.811             | Weighted mode             | 19 | -0.0175 | 0.1254 | 0.8905 | 0.0029  | 0.0161 | 0.8609 | 13.3012 | 0.7158 | 15.7571 |
| Stroke | family.Defluviitaleaceae.id.1924            | MR Egger                  | 18 | 0.0324  | 0.5442 | 0.9533 | -0.0061 | 0.0286 | 0.8331 | 22.1606 | 0.1381 | 4.5763  |
| Stroke | family.Defluviitaleaceae.id.1924            | Weighted median           | 18 | -0.1127 | 0.1345 | 0.4019 | -0.0061 | 0.0286 | 0.8331 | 22.1606 | 0.1381 | 4.5763  |
| Stroke | family.Defluviitaleaceae.id.1924            | Inverse variance weighted | 18 | -0.0818 | 0.1062 | 0.4413 | -0.0061 | 0.0286 | 0.8331 | 22.1606 | 0.1381 | 4.5763  |
| Stroke | family.Defluviitaleaceae.id.1924            | Simple mode               | 18 | -0.1582 | 0.2324 | 0.5052 | -0.0061 | 0.0286 | 0.8331 | 22.1606 | 0.1381 | 4.5763  |
| Stroke | family.Defluviitaleaceae.id.1924            | Weighted mode             | 18 | -0.1636 | 0.1813 | 0.3794 | -0.0061 | 0.0286 | 0.8331 | 22.1606 | 0.1381 | 4.5763  |
| Stroke | family.Desulfovibrionaceae.id.3169          | MR Egger                  | 19 | -0.2860 | 0.3301 | 0.3984 | 0.0143  | 0.0175 | 0.4248 | 17.2208 | 0.4395 | 11.4404 |
| Stroke | family.Desulfovibrionaceae.id.3169          | Weighted median           | 19 | -0.0773 | 0.0999 | 0.4393 | 0.0143  | 0.0175 | 0.4248 | 17.2208 | 0.4395 | 11.4404 |
| Stroke | family.Desulfovibrionaceae.id.3169          | Inverse variance weighted | 19 | -0.0219 | 0.0683 | 0.7484 | 0.0143  | 0.0175 | 0.4248 | 17.2208 | 0.4395 | 11.4404 |
| Stroke | family.Desulfovibrionaceae.id.3169          | Simple mode               | 19 | -0.1680 | 0.1822 | 0.3689 | 0.0143  | 0.0175 | 0.4248 | 17.2208 | 0.4395 | 11.4404 |
| Stroke | family.Desulfovibrionaceae.id.3169          | Weighted mode             | 19 | -0.1902 | 0.1822 | 0.3102 | 0.0143  | 0.0175 | 0.4248 | 17.2208 | 0.4395 | 11.4404 |
| Stroke | family.Enterobacteriaceae.id.3469           | MR Egger                  | 19 | -0.2164 | 0.3483 | 0.5427 | 0.0097  | 0.0185 | 0.6049 | 12.9010 | 0.7428 | 15.1316 |
| Stroke | family.Enterobacteriaceae.id.3469           | Weighted median           | 19 | -0.0950 | 0.1009 | 0.3463 | 0.0097  | 0.0185 | 0.6049 | 12.9010 | 0.7428 | 15.1316 |
| Stroke | family.Enterobacteriaceae.id.3469           | Inverse variance weighted | 19 | -0.0368 | 0.0725 | 0.6117 | 0.0097  | 0.0185 | 0.6049 | 12.9010 | 0.7428 | 15.1316 |
| Stroke | family.Enterobacteriaceae.id.3469           | Simple mode               | 19 | -0.1347 | 0.1927 | 0.4935 | 0.0097  | 0.0185 | 0.6049 | 12.9010 | 0.7428 | 15.1316 |
| Stroke | family.Enterobacteriaceae.id.3469           | Weighted mode             | 19 | -0.1532 | 0.1775 | 0.3997 | 0.0097  | 0.0185 | 0.6049 | 12.9010 | 0.7428 | 15.1316 |
| Stroke | family.Erysipelotrichaceae.id.2149          | MR Egger                  | 19 | 0.0701  | 0.4255 | 0.8710 | -0.0023 | 0.0226 | 0.9194 | 34.4011 | 0.0074 | 7.3529  |
| Stroke | family.Erysipelotrichaceae.id.2149          | Weighted median           | 19 | 0.0805  | 0.1004 | 0.4227 | -0.0023 | 0.0226 | 0.9194 | 34.4011 | 0.0074 | 7.3529  |
| Stroke | family.Erysipelotrichaceae.id.2149          | Inverse variance weighted | 19 | 0.0274  | 0.0862 | 0.7506 | -0.0023 | 0.0226 | 0.9194 | 34.4011 | 0.0074 | 7.3529  |
| Stroke | family.Erysipelotrichaceae.id.2149          | Simple mode               | 19 | 0.1713  | 0.2005 | 0.4041 | -0.0023 | 0.0226 | 0.9194 | 34.4011 | 0.0074 | 7.3529  |
| Stroke | family.Erysipelotrichaceae.id.2149          | Weighted mode             | 19 | 0.1464  | 0.1686 | 0.3965 | -0.0023 | 0.0226 | 0.9194 | 34.4011 | 0.0074 | 7.3529  |
| Stroke | family.FamilyXI.id.1936                     | MR Egger                  | 15 | -1.6582 | 0.8741 | 0.0803 | 0.0856  | 0.0461 | 0.0863 | 14.4492 | 0.4168 | 3.2809  |
| Stroke | family.FamilyXI.id.1936                     | Weighted median           | 15 | -0.0989 | 0.2280 | 0.6645 | 0.0856  | 0.0461 | 0.0863 | 14.4492 | 0.4168 | 3.2809  |
| Stroke | family.FamilyXI.id.1936                     | Inverse variance weighted | 15 | -0.0632 | 0.1625 | 0.6972 | 0.0856  | 0.0461 | 0.0863 | 14.4492 | 0.4168 | 3.2809  |
| Stroke | family.FamilyXI.id.1936                     | Simple mode               | 15 | 0.1327  | 0.3856 | 0.7358 | 0.0856  | 0.0461 | 0.0863 | 14.4492 | 0.4168 | 3.2809  |
| Stroke | family.FamilyXI.id.1936                     | Weighted mode             | 15 | -0.0076 | 0.3667 | 0.9837 | 0.0856  | 0.0461 | 0.0863 | 14.4492 | 0.4168 | 3.2809  |
| Stroke | family.FamilyXIII.id.1957                   | MR Egger                  | 19 | -0.1690 | 0.3335 | 0.6188 | 0.0045  | 0.0177 | 0.8003 | 19.3888 | 0.3067 | 13.2894 |
| Stroke | family.FamilyXIII.id.1957                   | Weighted median           | 19 | -0.1322 | 0.0948 | 0.1631 | 0.0045  | 0.0177 | 0.8003 | 19.3888 | 0.3067 | 13.2894 |
| Stroke | family.FamilyXIII.id.1957                   | Inverse variance weighted | 19 | -0.0852 | 0.0674 | 0.2066 | 0.0045  | 0.0177 | 0.8003 | 19.3888 | 0.3067 | 13.2894 |
| Stroke | family.FamilyXIII.id.1957                   | Simple mode               | 19 | -0.1575 | 0.1813 | 0.3965 | 0.0045  | 0.0177 | 0.8003 | 19.3888 | 0.3067 | 13.2894 |
| Stroke | family.FamilyXIII.id.1957                   | Weighted mode             | 19 | -0.1940 | 0.1766 | 0.2863 | 0.0045  | 0.0177 | 0.8003 | 19.3888 | 0.3067 | 13.2894 |
| Stroke | family.Lachnospiraceae.id.1987              | MR Egger                  | 19 | -0.2686 | 0.2981 | 0.3802 | 0.0125  | 0.0158 | 0.4404 | 14.0089 | 0.6665 | 12.9604 |
| Stroke | family.Lachnospiraceae.id.1987              | Weighted median           | 19 | -0.0347 | 0.0805 | 0.6665 | 0.0125  | 0.0158 | 0.4404 | 14.0089 | 0.6665 | 12.9604 |
| Stroke | family.Lachnospiraceae.id.1987              | Inverse variance weighted | 19 | -0.0383 | 0.0621 | 0.5380 | 0.0125  | 0.0158 | 0.4404 | 14.0089 | 0.6665 | 12.9604 |
| Stroke | family.Lachnospiraceae.id.1987              | Simple mode               | 19 | -0.0342 | 0.1238 | 0.7853 | 0.0125  | 0.0158 | 0.4404 | 14.0089 | 0.6665 | 12.9604 |
| Stroke | family.Lachnospiraceae.id.1987              | Weighted mode             | 19 | -0.0279 | 0.1157 | 0.8124 | 0.0125  | 0.0158 | 0.4404 | 14.0089 | 0.6665 | 12.9604 |
| Stroke | family.Lactobacillaceae.id.1836             | MR Egger                  | 18 | 0.0214  | 0.5348 | 0.9686 | -0.0048 | 0.0281 | 0.8667 | 17.8753 | 0.3313 | 4.9415  |
| Stroke | family.Lactobacillaceae.id.1836             | Weighted median           | 18 | 0.0193  | 0.1481 | 0.8963 | -0.0048 | 0.0281 | 0.8667 | 17.8753 | 0.3313 | 4.9415  |
| Stroke | family.Lactobacillaceae.id.1836             | Inverse variance weighted | 18 | -0.0680 | 0.1042 | 0.5143 | -0.0048 | 0.0281 | 0.8667 | 17.8753 | 0.3313 | 4.9415  |
| Stroke | family.Lactobacillaceae.id.1836             | Simple mode               | 18 | 0.0999  | 0.2682 | 0.7142 | -0.0048 | 0.0281 | 0.8667 | 17.8753 | 0.3313 | 4.9415  |
| Stroke | family.Lactobacillaceae.id.1836             | Weighted mode             | 18 | 0.0432  | 0.2519 | 0.8657 | -0.0048 | 0.0281 | 0.8667 | 17.8753 | 0.3313 | 4.9415  |

|        |                                         |                           |    |          |         |         |          |         |         |          |         |          |
|--------|-----------------------------------------|---------------------------|----|----------|---------|---------|----------|---------|---------|----------|---------|----------|
| Stroke | family. Methanobacteriaceae. id. 121    | MR Egger                  | 18 | 1. 0529  | 0. 6950 | 0. 1493 | -0. 0555 | 0. 0366 | 0. 1487 | 9. 5238  | 0. 9224 | 5. 6058  |
| Stroke | family. Methanobacteriaceae. id. 121    | Weighted median           | 18 | 0. 0345  | 0. 1867 | 0. 8534 | -0. 0555 | 0. 0366 | 0. 1487 | 9. 5238  | 0. 9224 | 5. 6058  |
| Stroke | family. Methanobacteriaceae. id. 121    | Inverse variance weighted | 18 | 0. 0194  | 0. 1386 | 0. 8885 | -0. 0555 | 0. 0366 | 0. 1487 | 9. 5238  | 0. 9224 | 5. 6058  |
| Stroke | family. Methanobacteriaceae. id. 121    | Simple mode               | 18 | 0. 0956  | 0. 3068 | 0. 7592 | -0. 0555 | 0. 0366 | 0. 1487 | 9. 5238  | 0. 9224 | 5. 6058  |
| Stroke | family. Methanobacteriaceae. id. 121    | Weighted mode             | 18 | 0. 0836  | 0. 2735 | 0. 7637 | -0. 0555 | 0. 0366 | 0. 1487 | 9. 5238  | 0. 9224 | 5. 6058  |
| Stroke | family. Oxalobacteraceae. id. 2966      | MR Egger                  | 18 | 0. 2402  | 0. 6636 | 0. 7221 | -0. 0140 | 0. 0349 | 0. 6935 | 20. 5647 | 0. 1959 | 3. 9844  |
| Stroke | family. Oxalobacteraceae. id. 2966      | Weighted median           | 18 | 0. 0715  | 0. 1728 | 0. 6789 | -0. 0140 | 0. 0349 | 0. 6935 | 20. 5647 | 0. 1959 | 3. 9844  |
| Stroke | family. Oxalobacteraceae. id. 2966      | Inverse variance weighted | 18 | -0. 0207 | 0. 1299 | 0. 8734 | -0. 0140 | 0. 0349 | 0. 6935 | 20. 5647 | 0. 1959 | 3. 9844  |
| Stroke | family. Oxalobacteraceae. id. 2966      | Simple mode               | 18 | 0. 0608  | 0. 3138 | 0. 8486 | -0. 0140 | 0. 0349 | 0. 6935 | 20. 5647 | 0. 1959 | 3. 9844  |
| Stroke | family. Oxalobacteraceae. id. 2966      | Weighted mode             | 18 | 0. 1747  | 0. 2511 | 0. 4960 | -0. 0140 | 0. 0349 | 0. 6935 | 20. 5647 | 0. 1959 | 3. 9844  |
| Stroke | family. Pasteurellaceae. id. 3689       | MR Egger                  | 19 | 0. 8233  | 0. 4173 | 0. 0650 | -0. 0415 | 0. 0222 | 0. 0786 | 14. 7962 | 0. 6759 | 11. 6549 |
| Stroke | family. Pasteurellaceae. id. 3689       | Weighted median           | 19 | 0. 1160  | 0. 1176 | 0. 3241 | -0. 0415 | 0. 0222 | 0. 0786 | 14. 7962 | 0. 6759 | 11. 6549 |
| Stroke | family. Pasteurellaceae. id. 3689       | Inverse variance weighted | 19 | 0. 0596  | 0. 0870 | 0. 4938 | -0. 0415 | 0. 0222 | 0. 0786 | 14. 7962 | 0. 6759 | 11. 6549 |
| Stroke | family. Pasteurellaceae. id. 3689       | Simple mode               | 19 | 0. 0561  | 0. 1990 | 0. 7812 | -0. 0415 | 0. 0222 | 0. 0786 | 14. 7962 | 0. 6759 | 11. 6549 |
| Stroke | family. Pasteurellaceae. id. 3689       | Weighted mode             | 19 | 0. 0326  | 0. 1661 | 0. 8468 | -0. 0415 | 0. 0222 | 0. 0786 | 14. 7962 | 0. 6759 | 11. 6549 |
| Stroke | family. Peptococcaceae. id. 2024        | MR Egger                  | 19 | -0. 1686 | 0. 4035 | 0. 6812 | 0. 0089  | 0. 0214 | 0. 6812 | 18. 1671 | 0. 3784 | 6. 6621  |
| Stroke | family. Peptococcaceae. id. 2024        | Weighted median           | 19 | -0. 0774 | 0. 1127 | 0. 4925 | 0. 0089  | 0. 0214 | 0. 6812 | 18. 1671 | 0. 3784 | 6. 6621  |
| Stroke | family. Peptococcaceae. id. 2024        | Inverse variance weighted | 19 | -0. 0037 | 0. 0816 | 0. 9642 | 0. 0089  | 0. 0214 | 0. 6812 | 18. 1671 | 0. 3784 | 6. 6621  |
| Stroke | family. Peptococcaceae. id. 2024        | Simple mode               | 19 | -0. 0216 | 0. 2031 | 0. 9164 | 0. 0089  | 0. 0214 | 0. 6812 | 18. 1671 | 0. 3784 | 6. 6621  |
| Stroke | family. Peptococcaceae. id. 2024        | Weighted mode             | 19 | -0. 0762 | 0. 1751 | 0. 6685 | 0. 0089  | 0. 0214 | 0. 6812 | 18. 1671 | 0. 3784 | 6. 6621  |
| Stroke | family. Peptostreptococcaceae. id. 2042 | MR Egger                  | 19 | 0. 7200  | 0. 3189 | 0. 0374 | -0. 0373 | 0. 0169 | 0. 0415 | 19. 9755 | 0. 3342 | 10. 8192 |
| Stroke | family. Peptostreptococcaceae. id. 2042 | Weighted median           | 19 | 0. 0622  | 0. 0982 | 0. 5267 | -0. 0373 | 0. 0169 | 0. 0415 | 19. 9755 | 0. 3342 | 10. 8192 |
| Stroke | family. Peptostreptococcaceae. id. 2042 | Inverse variance weighted | 19 | 0. 0322  | 0. 0699 | 0. 6449 | -0. 0373 | 0. 0169 | 0. 0415 | 19. 9755 | 0. 3342 | 10. 8192 |
| Stroke | family. Peptostreptococcaceae. id. 2042 | Simple mode               | 19 | 0. 0885  | 0. 1922 | 0. 6509 | -0. 0373 | 0. 0169 | 0. 0415 | 19. 9755 | 0. 3342 | 10. 8192 |
| Stroke | family. Peptostreptococcaceae. id. 2042 | Weighted mode             | 19 | 0. 1297  | 0. 1883 | 0. 4997 | -0. 0373 | 0. 0169 | 0. 0415 | 19. 9755 | 0. 3342 | 10. 8192 |
| Stroke | family. Porphyromonadaceae. id. 943     | MR Egger                  | 19 | 0. 1396  | 0. 3432 | 0. 6893 | -0. 0046 | 0. 0182 | 0. 8022 | 22. 1340 | 0. 1796 | 12. 6913 |
| Stroke | family. Porphyromonadaceae. id. 943     | Weighted median           | 19 | 0. 1125  | 0. 0881 | 0. 2014 | -0. 0046 | 0. 0182 | 0. 8022 | 22. 1340 | 0. 1796 | 12. 6913 |
| Stroke | family. Porphyromonadaceae. id. 943     | Inverse variance weighted | 19 | 0. 0542  | 0. 0696 | 0. 4365 | -0. 0046 | 0. 0182 | 0. 8022 | 22. 1340 | 0. 1796 | 12. 6913 |
| Stroke | family. Porphyromonadaceae. id. 943     | Simple mode               | 19 | 0. 1258  | 0. 1666 | 0. 4599 | -0. 0046 | 0. 0182 | 0. 8022 | 22. 1340 | 0. 1796 | 12. 6913 |
| Stroke | family. Porphyromonadaceae. id. 943     | Weighted mode             | 19 | 0. 1027  | 0. 1434 | 0. 4831 | -0. 0046 | 0. 0182 | 0. 8022 | 22. 1340 | 0. 1796 | 12. 6913 |
| Stroke | family. Prevotellaceae. id. 960         | MR Egger                  | 19 | -0. 2277 | 0. 3944 | 0. 5714 | 0. 0141  | 0. 0209 | 0. 5094 | 23. 9370 | 0. 1212 | 3. 5787  |
| Stroke | family. Prevotellaceae. id. 960         | Weighted median           | 19 | 0. 0966  | 0. 0976 | 0. 3227 | 0. 0141  | 0. 0209 | 0. 5094 | 23. 9370 | 0. 1212 | 3. 5787  |
| Stroke | family. Prevotellaceae. id. 960         | Inverse variance weighted | 19 | 0. 0324  | 0. 0809 | 0. 6892 | 0. 0141  | 0. 0209 | 0. 5094 | 23. 9370 | 0. 1212 | 3. 5787  |
| Stroke | family. Prevotellaceae. id. 960         | Simple mode               | 19 | 0. 1484  | 0. 1655 | 0. 3819 | 0. 0141  | 0. 0209 | 0. 5094 | 23. 9370 | 0. 1212 | 3. 5787  |
| Stroke | family. Prevotellaceae. id. 960         | Weighted mode             | 19 | 0. 1938  | 0. 1627 | 0. 2491 | 0. 0141  | 0. 0209 | 0. 5094 | 23. 9370 | 0. 1212 | 3. 5787  |
| Stroke | family. Rhodospirillaceae. id. 2717     | MR Egger                  | 18 | -0. 1131 | 0. 4533 | 0. 8061 | 0. 0043  | 0. 0239 | 0. 8577 | 9. 1733  | 0. 9061 | 13. 2769 |
| Stroke | family. Rhodospirillaceae. id. 2717     | Weighted median           | 18 | 0. 0262  | 0. 1223 | 0. 8306 | 0. 0043  | 0. 0239 | 0. 8577 | 9. 1733  | 0. 9061 | 13. 2769 |
| Stroke | family. Rhodospirillaceae. id. 2717     | Inverse variance weighted | 18 | -0. 0322 | 0. 0910 | 0. 7230 | 0. 0043  | 0. 0239 | 0. 8577 | 9. 1733  | 0. 9061 | 13. 2769 |
| Stroke | family. Rhodospirillaceae. id. 2717     | Simple mode               | 18 | 0. 0483  | 0. 2141 | 0. 8243 | 0. 0043  | 0. 0239 | 0. 8577 | 9. 1733  | 0. 9061 | 13. 2769 |
| Stroke | family. Rhodospirillaceae. id. 2717     | Weighted mode             | 18 | 0. 0668  | 0. 2335 | 0. 7782 | 0. 0043  | 0. 0239 | 0. 8577 | 9. 1733  | 0. 9061 | 13. 2769 |
| Stroke | family. Rikenellaceae. id. 967          | MR Egger                  | 19 | 0. 3514  | 0. 3324 | 0. 3052 | -0. 0202 | 0. 0176 | 0. 2675 | 21. 9112 | 0. 2359 | 8. 7013  |
| Stroke | family. Rikenellaceae. id. 967          | Weighted median           | 19 | 0. 0208  | 0. 0967 | 0. 8293 | -0. 0202 | 0. 0176 | 0. 2675 | 21. 9112 | 0. 2359 | 8. 7013  |
| Stroke | family. Rikenellaceae. id. 967          | Inverse variance weighted | 19 | -0. 0212 | 0. 0698 | 0. 7608 | -0. 0202 | 0. 0176 | 0. 2675 | 21. 9112 | 0. 2359 | 8. 7013  |
| Stroke | family. Rikenellaceae. id. 967          | Simple mode               | 19 | 0. 0184  | 0. 1585 | 0. 9090 | -0. 0202 | 0. 0176 | 0. 2675 | 21. 9112 | 0. 2359 | 8. 7013  |
| Stroke | family. Rikenellaceae. id. 967          | Weighted mode             | 19 | 0. 0146  | 0. 1669 | 0. 9314 | -0. 0202 | 0. 0176 | 0. 2675 | 21. 9112 | 0. 2359 | 8. 7013  |
| Stroke | family. Ruminococcaceae. id. 2050       | MR Egger                  | 19 | -0. 1084 | 0. 2982 | 0. 7208 | -0. 0021 | 0. 0158 | 0. 8969 | 14. 4189 | 0. 6373 | 8. 5307  |
| Stroke | family. Ruminococcaceae. id. 2050       | Weighted median           | 19 | -0. 1238 | 0. 0877 | 0. 1580 | -0. 0021 | 0. 0158 | 0. 8969 | 14. 4189 | 0. 6373 | 8. 5307  |
| Stroke | family. Ruminococcaceae. id. 2050       | Inverse variance weighted | 19 | -0. 1467 | 0. 0621 | 0. 0182 | -0. 0021 | 0. 0158 | 0. 8969 | 14. 4189 | 0. 6373 | 8. 5307  |
| Stroke | family. Ruminococcaceae. id. 2050       | Simple mode               | 19 | -0. 1722 | 0. 1397 | 0. 2335 | -0. 0021 | 0. 0158 | 0. 8969 | 14. 4189 | 0. 6373 | 8. 5307  |
| Stroke | family. Ruminococcaceae. id. 2050       | Weighted mode             | 19 | -0. 1293 | 0. 1254 | 0. 3162 | -0. 0021 | 0. 0158 | 0. 8969 | 14. 4189 | 0. 6373 | 8. 5307  |
| Stroke | family. Streptococcaceae. id. 1850      | MR Egger                  | 19 | 0. 2967  | 0. 3310 | 0. 3826 | -0. 0205 | 0. 0176 | 0. 2596 | 20. 5250 | 0. 3040 | 10. 4143 |
| Stroke | family. Streptococcaceae. id. 1850      | Weighted median           | 19 | -0. 0526 | 0. 1011 | 0. 6029 | -0. 0205 | 0. 0176 | 0. 2596 | 20. 5250 | 0. 3040 | 10. 4143 |
| Stroke | family. Streptococcaceae. id. 1850      | Inverse variance weighted | 19 | -0. 0810 | 0. 0696 | 0. 2446 | -0. 0205 | 0. 0176 | 0. 2596 | 20. 5250 | 0. 3040 | 10. 4143 |
| Stroke | family. Streptococcaceae. id. 1850      | Simple mode               | 19 | -0. 3838 | 0. 2316 | 0. 1147 | -0. 0205 | 0. 0176 | 0. 2596 | 20. 5250 | 0. 3040 | 10. 4143 |
| Stroke | family. Streptococcaceae. id. 1850      | Weighted mode             | 19 | 0. 1416  | 0. 1795 | 0. 4404 | -0. 0205 | 0. 0176 | 0. 2596 | 20. 5250 | 0. 3040 | 10. 4143 |
| Stroke | family. Veillonellaceae. id. 2172       | MR Egger                  | 19 | -0. 2479 | 0. 3201 | 0. 4493 | 0. 0109  | 0. 0170 | 0. 5290 | 11. 7504 | 0. 8150 | 13. 3772 |
| Stroke | family. Veillonellaceae. id. 2172       | Weighted median           | 19 | -0. 0733 | 0. 0931 | 0. 4312 | 0. 0109  | 0. 0170 | 0. 5290 | 11. 7504 | 0. 8150 | 13. 3772 |
| Stroke | family. Veillonellaceae. id. 2172       | Inverse variance weighted | 19 | -0. 0467 | 0. 0667 | 0. 4839 | 0. 0109  | 0. 0170 | 0. 5290 | 11. 7504 | 0. 8150 | 13. 3772 |

|        |                                                  |                           |    |         |        |        |         |        |        |         |        |         |
|--------|--------------------------------------------------|---------------------------|----|---------|--------|--------|---------|--------|--------|---------|--------|---------|
| Stroke | family.Veillonellaceae.id.2172                   | Simple mode               | 19 | -0.0117 | 0.1651 | 0.9445 | 0.0109  | 0.0170 | 0.5290 | 11.7504 | 0.8150 | 13.3772 |
| Stroke | family.Veillonellaceae.id.2172                   | Weighted mode             | 19 | -0.0861 | 0.1441 | 0.5577 | 0.0109  | 0.0170 | 0.5290 | 11.7504 | 0.8150 | 13.3772 |
| Stroke | family.Verrucomicrobiaceae.id.4036               | MR Egger                  | 19 | -0.0221 | 0.3860 | 0.9551 | 0.0053  | 0.0205 | 0.7986 | 18.6744 | 0.3475 | 7.2545  |
| Stroke | family.Verrucomicrobiaceae.id.4036               | Weighted median           | 19 | 0.0502  | 0.1103 | 0.6490 | 0.0053  | 0.0205 | 0.7986 | 18.6744 | 0.3475 | 7.2545  |
| Stroke | family.Verrucomicrobiaceae.id.4036               | Inverse variance weighted | 19 | 0.0758  | 0.0783 | 0.3332 | 0.0053  | 0.0205 | 0.7986 | 18.6744 | 0.3475 | 7.2545  |
| Stroke | family.Verrucomicrobiaceae.id.4036               | Simple mode               | 19 | 0.2093  | 0.1957 | 0.2990 | 0.0053  | 0.0205 | 0.7986 | 18.6744 | 0.3475 | 7.2545  |
| Stroke | family.Verrucomicrobiaceae.id.4036               | Weighted mode             | 19 | 0.0804  | 0.1779 | 0.6566 | 0.0053  | 0.0205 | 0.7986 | 18.6744 | 0.3475 | 7.2545  |
| Stroke | family.Victivallaceae.id.2255                    | MR Egger                  | 18 | -0.7325 | 0.8079 | 0.3780 | 0.0358  | 0.0426 | 0.4133 | 23.2921 | 0.1061 | 2.4996  |
| Stroke | family.Victivallaceae.id.2255                    | Weighted median           | 18 | -0.0363 | 0.2025 | 0.8578 | 0.0358  | 0.0426 | 0.4133 | 23.2921 | 0.1061 | 2.4996  |
| Stroke | family.Victivallaceae.id.2255                    | Inverse variance weighted | 18 | -0.0677 | 0.1605 | 0.6730 | 0.0358  | 0.0426 | 0.4133 | 23.2921 | 0.1061 | 2.4996  |
| Stroke | family.Victivallaceae.id.2255                    | Simple mode               | 18 | -0.2017 | 0.3830 | 0.6053 | 0.0358  | 0.0426 | 0.4133 | 23.2921 | 0.1061 | 2.4996  |
| Stroke | family.Victivallaceae.id.2255                    | Weighted mode             | 18 | -0.0493 | 0.3032 | 0.8727 | 0.0358  | 0.0426 | 0.4133 | 23.2921 | 0.1061 | 2.4996  |
| Stroke | family.unknownfamily.id.1000001214               | MR Egger                  | 18 | -0.6645 | 0.5481 | 0.2429 | 0.0292  | 0.0289 | 0.3266 | 15.4817 | 0.5608 | 4.6775  |
| Stroke | family.unknownfamily.id.1000001214               | Weighted median           | 18 | -0.1529 | 0.1552 | 0.3246 | 0.0292  | 0.0289 | 0.3266 | 15.4817 | 0.5608 | 4.6775  |
| Stroke | family.unknownfamily.id.1000001214               | Inverse variance weighted | 18 | -0.1211 | 0.1098 | 0.2700 | 0.0292  | 0.0289 | 0.3266 | 15.4817 | 0.5608 | 4.6775  |
| Stroke | family.unknownfamily.id.1000001214               | Simple mode               | 18 | 0.3499  | 0.3057 | 0.2683 | 0.0292  | 0.0289 | 0.3266 | 15.4817 | 0.5608 | 4.6775  |
| Stroke | family.unknownfamily.id.1000001214               | Weighted mode             | 18 | -0.3652 | 0.2792 | 0.2083 | 0.0292  | 0.0289 | 0.3266 | 15.4817 | 0.5608 | 4.6775  |
| Stroke | family.unknownfamily.id.1000005471               | MR Egger                  | 19 | 0.0712  | 0.3984 | 0.8603 | -0.0050 | 0.0211 | 0.8146 | 16.6191 | 0.4804 | 8.5205  |
| Stroke | family.unknownfamily.id.1000005471               | Weighted median           | 19 | -0.0394 | 0.1202 | 0.7431 | -0.0050 | 0.0211 | 0.8146 | 16.6191 | 0.4804 | 8.5205  |
| Stroke | family.unknownfamily.id.1000005471               | Inverse variance weighted | 19 | -0.0216 | 0.0825 | 0.7931 | -0.0050 | 0.0211 | 0.8146 | 16.6191 | 0.4804 | 8.5205  |
| Stroke | family.unknownfamily.id.1000005471               | Simple mode               | 19 | 0.0373  | 0.1914 | 0.8478 | -0.0050 | 0.0211 | 0.8146 | 16.6191 | 0.4804 | 8.5205  |
| Stroke | family.unknownfamily.id.1000005471               | Weighted mode             | 19 | -0.0153 | 0.2069 | 0.9418 | -0.0050 | 0.0211 | 0.8146 | 16.6191 | 0.4804 | 8.5205  |
| Stroke | family.unknownfamily.id.1000006161               | MR Egger                  | 18 | -1.1332 | 0.8362 | 0.1942 | 0.0593  | 0.0441 | 0.1969 | 36.5050 | 0.0039 | 2.5156  |
| Stroke | family.unknownfamily.id.1000006161               | Weighted median           | 18 | -0.0596 | 0.1821 | 0.7433 | 0.0593  | 0.0441 | 0.1969 | 36.5050 | 0.0039 | 2.5156  |
| Stroke | family.unknownfamily.id.1000006161               | Inverse variance weighted | 18 | -0.0302 | 0.1717 | 0.8604 | 0.0593  | 0.0441 | 0.1969 | 36.5050 | 0.0039 | 2.5156  |
| Stroke | family.unknownfamily.id.1000006161               | Simple mode               | 18 | -0.0522 | 0.3417 | 0.8803 | 0.0593  | 0.0441 | 0.1969 | 36.5050 | 0.0039 | 2.5156  |
| Stroke | family.unknownfamily.id.1000006161               | Weighted mode             | 18 | -0.0785 | 0.2605 | 0.7668 | 0.0593  | 0.0441 | 0.1969 | 36.5050 | 0.0039 | 2.5156  |
| Stroke | genus.Clostridiuminnocuumgroup.id.14397          | MR Egger                  | 18 | 0.0036  | 0.7023 | 0.9960 | 0.0111  | 0.0370 | 0.7686 | 18.4892 | 0.2960 | 3.0518  |
| Stroke | genus.Clostridiuminnocuumgroup.id.14397          | Weighted median           | 18 | 0.2816  | 0.1896 | 0.1376 | 0.0111  | 0.0370 | 0.7686 | 18.4892 | 0.2960 | 3.0518  |
| Stroke | genus.Clostridiuminnocuumgroup.id.14397          | Inverse variance weighted | 18 | 0.2095  | 0.1371 | 0.1264 | 0.0111  | 0.0370 | 0.7686 | 18.4892 | 0.2960 | 3.0518  |
| Stroke | genus.Clostridiuminnocuumgroup.id.14397          | Simple mode               | 18 | 0.2885  | 0.3359 | 0.4024 | 0.0111  | 0.0370 | 0.7686 | 18.4892 | 0.2960 | 3.0518  |
| Stroke | genus.Clostridiuminnocuumgroup.id.14397          | Weighted mode             | 18 | 0.3677  | 0.2804 | 0.2071 | 0.0111  | 0.0370 | 0.7686 | 18.4892 | 0.2960 | 3.0518  |
| Stroke | genus.Eubacteriumbrachygroup.id.11296            | MR Egger                  | 18 | -1.5965 | 0.6646 | 0.0288 | 0.0683  | 0.0350 | 0.0684 | 16.5775 | 0.4833 | 2.9528  |
| Stroke | genus.Eubacteriumbrachygroup.id.11296            | Weighted median           | 18 | -0.3145 | 0.1968 | 0.1100 | 0.0683  | 0.0350 | 0.0684 | 16.5775 | 0.4833 | 2.9528  |
| Stroke | genus.Eubacteriumbrachygroup.id.11296            | Inverse variance weighted | 18 | -0.3244 | 0.1331 | 0.0148 | 0.0683  | 0.0350 | 0.0684 | 16.5775 | 0.4833 | 2.9528  |
| Stroke | genus.Eubacteriumbrachygroup.id.11296            | Simple mode               | 18 | -0.3562 | 0.3284 | 0.2932 | 0.0683  | 0.0350 | 0.0684 | 16.5775 | 0.4833 | 2.9528  |
| Stroke | genus.Eubacteriumbrachygroup.id.11296            | Weighted mode             | 18 | -0.3094 | 0.3167 | 0.3423 | 0.0683  | 0.0350 | 0.0684 | 16.5775 | 0.4833 | 2.9528  |
| Stroke | genus.Eubacteriumcoprostanoligenesgroup.id.11375 | MR Egger                  | 19 | 0.1587  | 0.3062 | 0.6109 | -0.0073 | 0.0162 | 0.6578 | 15.8769 | 0.5326 | 13.0808 |
| Stroke | genus.Eubacteriumcoprostanoligenesgroup.id.11375 | Weighted median           | 19 | 0.0306  | 0.0888 | 0.7302 | -0.0073 | 0.0162 | 0.6578 | 15.8769 | 0.5326 | 13.0808 |
| Stroke | genus.Eubacteriumcoprostanoligenesgroup.id.11375 | Inverse variance weighted | 19 | 0.0237  | 0.0638 | 0.7099 | -0.0073 | 0.0162 | 0.6578 | 15.8769 | 0.5326 | 13.0808 |
| Stroke | genus.Eubacteriumcoprostanoligenesgroup.id.11375 | Simple mode               | 19 | 0.0008  | 0.1504 | 0.9957 | -0.0073 | 0.0162 | 0.6578 | 15.8769 | 0.5326 | 13.0808 |
| Stroke | genus.Eubacteriumcoprostanoligenesgroup.id.11375 | Weighted mode             | 19 | 0.0292  | 0.1222 | 0.8139 | -0.0073 | 0.0162 | 0.6578 | 15.8769 | 0.5326 | 13.0808 |
| Stroke | genus.Eubacteriumeligensgroup.id.14372           | MR Egger                  | 19 | 0.1645  | 0.3592 | 0.6528 | -0.0113 | 0.0191 | 0.5628 | 19.8974 | 0.2795 | 8.9193  |
| Stroke | genus.Eubacteriumeligensgroup.id.14372           | Weighted median           | 19 | -0.0974 | 0.0976 | 0.3185 | -0.0113 | 0.0191 | 0.5628 | 19.8974 | 0.2795 | 8.9193  |
| Stroke | genus.Eubacteriumeligensgroup.id.14372           | Inverse variance weighted | 19 | -0.0429 | 0.0735 | 0.5597 | -0.0113 | 0.0191 | 0.5628 | 19.8974 | 0.2795 | 8.9193  |
| Stroke | genus.Eubacteriumeligensgroup.id.14372           | Simple mode               | 19 | -0.0682 | 0.1726 | 0.6975 | -0.0113 | 0.0191 | 0.5628 | 19.8974 | 0.2795 | 8.9193  |
| Stroke | genus.Eubacteriumeligensgroup.id.14372           | Weighted mode             | 19 | -0.0880 | 0.1478 | 0.5591 | -0.0113 | 0.0191 | 0.5628 | 19.8974 | 0.2795 | 8.9193  |
| Stroke | genus.Eubacteriumfissicatenagroup.id.14373       | MR Egger                  | 18 | -0.1588 | 0.6845 | 0.8195 | 0.0092  | 0.0360 | 0.8012 | 13.9352 | 0.6035 | 4.2457  |
| Stroke | genus.Eubacteriumfissicatenagroup.id.14373       | Weighted median           | 18 | -0.0629 | 0.1864 | 0.7359 | 0.0092  | 0.0360 | 0.8012 | 13.9352 | 0.6035 | 4.2457  |
| Stroke | genus.Eubacteriumfissicatenagroup.id.14373       | Inverse variance weighted | 18 | 0.0128  | 0.1371 | 0.9254 | 0.0092  | 0.0360 | 0.8012 | 13.9352 | 0.6035 | 4.2457  |
| Stroke | genus.Eubacteriumfissicatenagroup.id.14373       | Simple mode               | 18 | -0.0161 | 0.3419 | 0.9629 | 0.0092  | 0.0360 | 0.8012 | 13.9352 | 0.6035 | 4.2457  |
| Stroke | genus.Eubacteriumfissicatenagroup.id.14373       | Weighted mode             | 18 | -0.1919 | 0.2823 | 0.5057 | 0.0092  | 0.0360 | 0.8012 | 13.9352 | 0.6035 | 4.2457  |
| Stroke | genus.Eubacteriumhalliigroup.id.11338            | MR Egger                  | 19 | 0.1365  | 0.3131 | 0.6683 | -0.0079 | 0.0166 | 0.6413 | 14.2134 | 0.6519 | 11.3706 |
| Stroke | genus.Eubacteriumhalliigroup.id.11338            | Weighted median           | 19 | -0.0462 | 0.0900 | 0.6079 | -0.0079 | 0.0166 | 0.6413 | 14.2134 | 0.6519 | 11.3706 |
| Stroke | genus.Eubacteriumhalliigroup.id.11338            | Inverse variance weighted | 19 | -0.0087 | 0.0653 | 0.8936 | -0.0079 | 0.0166 | 0.6413 | 14.2134 | 0.6519 | 11.3706 |
| Stroke | genus.Eubacteriumhalliigroup.id.11338            | Simple mode               | 19 | 0.0779  | 0.1732 | 0.6583 | -0.0079 | 0.0166 | 0.6413 | 14.2134 | 0.6519 | 11.3706 |
| Stroke | genus.Eubacteriumhalliigroup.id.11338            | Weighted mode             | 19 | 0.0886  | 0.1577 | 0.5814 | -0.0079 | 0.0166 | 0.6413 | 14.2134 | 0.6519 | 11.3706 |
| Stroke | genus.Eubacteriumnodatumgroup.id.11297           | MR Egger                  | 18 | 0.1771  | 0.7239 | 0.8099 | -0.0079 | 0.0381 | 0.8375 | 14.6420 | 0.5510 | 3.5717  |

|        |                                                 |                           |    |         |        |        |         |        |        |         |        |         |
|--------|-------------------------------------------------|---------------------------|----|---------|--------|--------|---------|--------|--------|---------|--------|---------|
| Stroke | genus..Eubacteriumnodatumgroup. id. 11297       | Weighted median           | 18 | -0.0071 | 0.2012 | 0.9718 | -0.0079 | 0.0381 | 0.8375 | 14.6420 | 0.5510 | 3.5717  |
| Stroke | genus..Eubacteriumnodatumgroup. id. 11297       | Inverse variance weighted | 18 | 0.0292  | 0.1454 | 0.8409 | -0.0079 | 0.0381 | 0.8375 | 14.6420 | 0.5510 | 3.5717  |
| Stroke | genus..Eubacteriumnodatumgroup. id. 11297       | Simple mode               | 18 | -0.0091 | 0.3669 | 0.9805 | -0.0079 | 0.0381 | 0.8375 | 14.6420 | 0.5510 | 3.5717  |
| Stroke | genus..Eubacteriumnodatumgroup. id. 11297       | Weighted mode             | 18 | -0.1004 | 0.3312 | 0.7655 | -0.0079 | 0.0381 | 0.8375 | 14.6420 | 0.5510 | 3.5717  |
| Stroke | genus..Eubacteriumoxidoreducensgroup. id. 11339 | MR Egger                  | 18 | 0.4832  | 0.5838 | 0.4200 | -0.0217 | 0.0308 | 0.4912 | 11.9184 | 0.7496 | 6.7923  |
| Stroke | genus..Eubacteriumoxidoreducensgroup. id. 11339 | Weighted median           | 18 | 0.0876  | 0.1643 | 0.5940 | -0.0217 | 0.0308 | 0.4912 | 11.9184 | 0.7496 | 6.7923  |
| Stroke | genus..Eubacteriumoxidoreducensgroup. id. 11339 | Inverse variance weighted | 18 | 0.0803  | 0.1174 | 0.4941 | -0.0217 | 0.0308 | 0.4912 | 11.9184 | 0.7496 | 6.7923  |
| Stroke | genus..Eubacteriumoxidoreducensgroup. id. 11339 | Simple mode               | 18 | 0.2464  | 0.3007 | 0.4238 | -0.0217 | 0.0308 | 0.4912 | 11.9184 | 0.7496 | 6.7923  |
| Stroke | genus..Eubacteriumoxidoreducensgroup. id. 11339 | Weighted mode             | 18 | 0.0839  | 0.2739 | 0.7630 | -0.0217 | 0.0308 | 0.4912 | 11.9184 | 0.7496 | 6.7923  |
| Stroke | genus..Eubacteriumrectalegroup. id. 14374       | MR Egger                  | 19 | -0.1406 | 0.3441 | 0.6879 | 0.0083  | 0.0183 | 0.6556 | 21.5168 | 0.2040 | 12.4809 |
| Stroke | genus..Eubacteriumrectalegroup. id. 14374       | Weighted median           | 19 | 0.0055  | 0.0929 | 0.9528 | 0.0083  | 0.0183 | 0.6556 | 21.5168 | 0.2040 | 12.4809 |
| Stroke | genus..Eubacteriumrectalegroup. id. 14374       | Inverse variance weighted | 19 | 0.0122  | 0.0702 | 0.8623 | 0.0083  | 0.0183 | 0.6556 | 21.5168 | 0.2040 | 12.4809 |
| Stroke | genus..Eubacteriumrectalegroup. id. 14374       | Simple mode               | 19 | 0.0226  | 0.1671 | 0.8940 | 0.0083  | 0.0183 | 0.6556 | 21.5168 | 0.2040 | 12.4809 |
| Stroke | genus..Eubacteriumrectalegroup. id. 14374       | Weighted mode             | 19 | 0.0079  | 0.1420 | 0.9563 | 0.0083  | 0.0183 | 0.6556 | 21.5168 | 0.2040 | 12.4809 |
| Stroke | genus..Eubacteriumruminantiumgroup. id. 11340   | MR Egger                  | 18 | 0.1378  | 0.5399 | 0.8019 | -0.0077 | 0.0285 | 0.7904 | 19.9523 | 0.2224 | 5.1076  |
| Stroke | genus..Eubacteriumruminantiumgroup. id. 11340   | Weighted median           | 18 | 0.0177  | 0.1322 | 0.8934 | -0.0077 | 0.0285 | 0.7904 | 19.9523 | 0.2224 | 5.1076  |
| Stroke | genus..Eubacteriumruminantiumgroup. id. 11340   | Inverse variance weighted | 18 | -0.0052 | 0.1054 | 0.9604 | -0.0077 | 0.0285 | 0.7904 | 19.9523 | 0.2224 | 5.1076  |
| Stroke | genus..Eubacteriumruminantiumgroup. id. 11340   | Simple mode               | 18 | 0.0125  | 0.2104 | 0.9532 | -0.0077 | 0.0285 | 0.7904 | 19.9523 | 0.2224 | 5.1076  |
| Stroke | genus..Eubacteriumruminantiumgroup. id. 11340   | Weighted mode             | 18 | -0.0082 | 0.2119 | 0.9694 | -0.0077 | 0.0285 | 0.7904 | 19.9523 | 0.2224 | 5.1076  |
| Stroke | genus..Eubacteriumventriosumgroup. id. 11341    | MR Egger                  | 19 | 0.2881  | 0.3627 | 0.4380 | -0.0131 | 0.0192 | 0.5052 | 20.9378 | 0.2291 | 10.3763 |
| Stroke | genus..Eubacteriumventriosumgroup. id. 11341    | Weighted median           | 19 | 0.1358  | 0.0934 | 0.1463 | -0.0131 | 0.0192 | 0.5052 | 20.9378 | 0.2291 | 10.3763 |
| Stroke | genus..Eubacteriumventriosumgroup. id. 11341    | Inverse variance weighted | 19 | 0.0465  | 0.0743 | 0.5311 | -0.0131 | 0.0192 | 0.5052 | 20.9378 | 0.2291 | 10.3763 |
| Stroke | genus..Eubacteriumventriosumgroup. id. 11341    | Simple mode               | 19 | 0.2870  | 0.2034 | 0.1752 | -0.0131 | 0.0192 | 0.5052 | 20.9378 | 0.2291 | 10.3763 |
| Stroke | genus..Eubacteriumventriosumgroup. id. 11341    | Weighted mode             | 19 | 0.2551  | 0.1639 | 0.1370 | -0.0131 | 0.0192 | 0.5052 | 20.9378 | 0.2291 | 10.3763 |
| Stroke | genus..Eubacteriumxylanophilumgroup. id. 14375  | MR Egger                  | 19 | 0.1126  | 0.4205 | 0.7922 | -0.0098 | 0.0223 | 0.6644 | 24.7388 | 0.1007 | 8.1069  |
| Stroke | genus..Eubacteriumxylanophilumgroup. id. 14375  | Weighted median           | 19 | -0.0122 | 0.1050 | 0.9077 | -0.0098 | 0.0223 | 0.6644 | 24.7388 | 0.1007 | 8.1069  |
| Stroke | genus..Eubacteriumxylanophilumgroup. id. 14375  | Inverse variance weighted | 19 | -0.0691 | 0.0854 | 0.4185 | -0.0098 | 0.0223 | 0.6644 | 24.7388 | 0.1007 | 8.1069  |
| Stroke | genus..Eubacteriumxylanophilumgroup. id. 14375  | Simple mode               | 19 | 0.0168  | 0.1767 | 0.9251 | -0.0098 | 0.0223 | 0.6644 | 24.7388 | 0.1007 | 8.1069  |
| Stroke | genus..Eubacteriumxylanophilumgroup. id. 14375  | Weighted mode             | 19 | 0.0298  | 0.1881 | 0.8761 | -0.0098 | 0.0223 | 0.6644 | 24.7388 | 0.1007 | 8.1069  |
| Stroke | genus..Ruminococcusgavreaii group. id. 11342    | MR Egger                  | 19 | -0.2266 | 0.3505 | 0.5267 | 0.0075  | 0.0186 | 0.6932 | 17.2305 | 0.4389 | 11.7468 |
| Stroke | genus..Ruminococcusgavreaii group. id. 11342    | Weighted median           | 19 | -0.1729 | 0.0986 | 0.0795 | 0.0075  | 0.0186 | 0.6932 | 17.2305 | 0.4389 | 11.7468 |
| Stroke | genus..Ruminococcusgavreaii group. id. 11342    | Inverse variance weighted | 19 | -0.0890 | 0.0726 | 0.2200 | 0.0075  | 0.0186 | 0.6932 | 17.2305 | 0.4389 | 11.7468 |
| Stroke | genus..Ruminococcusgavreaii group. id. 11342    | Simple mode               | 19 | -0.3104 | 0.2020 | 0.1418 | 0.0075  | 0.0186 | 0.6932 | 17.2305 | 0.4389 | 11.7468 |
| Stroke | genus..Ruminococcusgavreaii group. id. 11342    | Weighted mode             | 19 | -0.2898 | 0.2002 | 0.1649 | 0.0075  | 0.0186 | 0.6932 | 17.2305 | 0.4389 | 11.7468 |
| Stroke | genus..Ruminococcusgnavusgroup. id. 14376       | MR Egger                  | 18 | -0.1584 | 0.5290 | 0.7685 | 0.0124  | 0.0279 | 0.6628 | 11.5479 | 0.7745 | 8.0953  |
| Stroke | genus..Ruminococcusgnavusgroup. id. 14376       | Weighted median           | 18 | 0.1072  | 0.1433 | 0.4546 | 0.0124  | 0.0279 | 0.6628 | 11.5479 | 0.7745 | 8.0953  |
| Stroke | genus..Ruminococcusgnavusgroup. id. 14376       | Inverse variance weighted | 18 | 0.0718  | 0.1065 | 0.5003 | 0.0124  | 0.0279 | 0.6628 | 11.5479 | 0.7745 | 8.0953  |
| Stroke | genus..Ruminococcusgnavusgroup. id. 14376       | Simple mode               | 18 | 0.1387  | 0.2470 | 0.5818 | 0.0124  | 0.0279 | 0.6628 | 11.5479 | 0.7745 | 8.0953  |
| Stroke | genus..Ruminococcusgnavusgroup. id. 14376       | Weighted mode             | 18 | 0.1335  | 0.2468 | 0.5955 | 0.0124  | 0.0279 | 0.6628 | 11.5479 | 0.7745 | 8.0953  |
| Stroke | genus..Ruminococcustorquesgroup. id. 14377      | MR Egger                  | 19 | -0.0806 | 0.3026 | 0.7931 | 0.0020  | 0.0161 | 0.9011 | 9.6855  | 0.9163 | 19.4630 |
| Stroke | genus..Ruminococcustorquesgroup. id. 14377      | Weighted median           | 19 | -0.0207 | 0.0828 | 0.8030 | 0.0020  | 0.0161 | 0.9011 | 9.6855  | 0.9163 | 19.4630 |
| Stroke | genus..Ruminococcustorquesgroup. id. 14377      | Inverse variance weighted | 19 | -0.0433 | 0.0630 | 0.4925 | 0.0020  | 0.0161 | 0.9011 | 9.6855  | 0.9163 | 19.4630 |
| Stroke | genus..Ruminococcustorquesgroup. id. 14377      | Simple mode               | 19 | 0.0455  | 0.1384 | 0.7461 | 0.0020  | 0.0161 | 0.9011 | 9.6855  | 0.9163 | 19.4630 |
| Stroke | genus..Ruminococcustorquesgroup. id. 14377      | Weighted mode             | 19 | 0.0400  | 0.1379 | 0.7752 | 0.0020  | 0.0161 | 0.9011 | 9.6855  | 0.9163 | 19.4630 |
| Stroke | genus. Actinomyces. id. 423                     | MR Egger                  | 18 | 0.0928  | 0.4846 | 0.8505 | -0.0159 | 0.0255 | 0.5412 | 13.9909 | 0.5994 | 5.8065  |
| Stroke | genus. Actinomyces. id. 423                     | Weighted median           | 18 | -0.2271 | 0.1300 | 0.0807 | -0.0159 | 0.0255 | 0.5412 | 13.9909 | 0.5994 | 5.8065  |
| Stroke | genus. Actinomyces. id. 423                     | Inverse variance weighted | 18 | -0.2036 | 0.0975 | 0.0367 | -0.0159 | 0.0255 | 0.5412 | 13.9909 | 0.5994 | 5.8065  |
| Stroke | genus. Actinomyces. id. 423                     | Simple mode               | 18 | -0.2609 | 0.2227 | 0.2576 | -0.0159 | 0.0255 | 0.5412 | 13.9909 | 0.5994 | 5.8065  |
| Stroke | genus. Actinomyces. id. 423                     | Weighted mode             | 18 | -0.2848 | 0.2116 | 0.1961 | -0.0159 | 0.0255 | 0.5412 | 13.9909 | 0.5994 | 5.8065  |
| Stroke | genus. Adlercreutzia. id. 812                   | MR Egger                  | 19 | 0.7360  | 0.4388 | 0.1118 | -0.0460 | 0.0232 | 0.0645 | 12.5682 | 0.8166 | 5.5610  |
| Stroke | genus. Adlercreutzia. id. 812                   | Weighted median           | 19 | -0.1446 | 0.1257 | 0.2502 | -0.0460 | 0.0232 | 0.0645 | 12.5682 | 0.8166 | 5.5610  |
| Stroke | genus. Adlercreutzia. id. 812                   | Inverse variance weighted | 19 | -0.1125 | 0.0916 | 0.2194 | -0.0460 | 0.0232 | 0.0645 | 12.5682 | 0.8166 | 5.5610  |
| Stroke | genus. Adlercreutzia. id. 812                   | Simple mode               | 19 | -0.1890 | 0.2183 | 0.3981 | -0.0460 | 0.0232 | 0.0645 | 12.5682 | 0.8166 | 5.5610  |
| Stroke | genus. Adlercreutzia. id. 812                   | Weighted mode             | 19 | -0.1602 | 0.2137 | 0.4631 | -0.0460 | 0.0232 | 0.0645 | 12.5682 | 0.8166 | 5.5610  |
| Stroke | genus. Akkermansia. id. 4037                    | MR Egger                  | 19 | -0.0134 | 0.3860 | 0.9728 | 0.0048  | 0.0205 | 0.8177 | 18.6704 | 0.3478 | 7.3395  |
| Stroke | genus. Akkermansia. id. 4037                    | Weighted median           | 19 | 0.0503  | 0.1076 | 0.6401 | 0.0048  | 0.0205 | 0.8177 | 18.6704 | 0.3478 | 7.3395  |
| Stroke | genus. Akkermansia. id. 4037                    | Inverse variance weighted | 19 | 0.0750  | 0.0783 | 0.3380 | 0.0048  | 0.0205 | 0.8177 | 18.6704 | 0.3478 | 7.3395  |
| Stroke | genus. Akkermansia. id. 4037                    | Simple mode               | 19 | 0.2123  | 0.1941 | 0.2885 | 0.0048  | 0.0205 | 0.8177 | 18.6704 | 0.3478 | 7.3395  |

|        |                                 |                           |    |         |        |        |         |        |        |         |        |         |
|--------|---------------------------------|---------------------------|----|---------|--------|--------|---------|--------|--------|---------|--------|---------|
| Stroke | genus. Akkermansia. id. 4037    | Weighted mode             | 19 | 0.0741  | 0.1867 | 0.6962 | 0.0048  | 0.0205 | 0.8177 | 18.6704 | 0.3478 | 7.3395  |
| Stroke | genus. Alistipes. id. 968       | MR Egger                  | 19 | 0.4072  | 0.3380 | 0.2449 | -0.0228 | 0.0179 | 0.2199 | 22.8937 | 0.1947 | 9.0623  |
| Stroke | genus. Alistipes. id. 968       | Weighted median           | 19 | -0.0332 | 0.0915 | 0.7166 | -0.0228 | 0.0179 | 0.2199 | 22.8937 | 0.1947 | 9.0623  |
| Stroke | genus. Alistipes. id. 968       | Inverse variance weighted | 19 | -0.0139 | 0.0715 | 0.8457 | -0.0228 | 0.0179 | 0.2199 | 22.8937 | 0.1947 | 9.0623  |
| Stroke | genus. Alistipes. id. 968       | Simple mode               | 19 | 0.0237  | 0.1567 | 0.8817 | -0.0228 | 0.0179 | 0.2199 | 22.8937 | 0.1947 | 9.0623  |
| Stroke | genus. Alistipes. id. 968       | Weighted mode             | 19 | 0.0134  | 0.1363 | 0.9229 | -0.0228 | 0.0179 | 0.2199 | 22.8937 | 0.1947 | 9.0623  |
| Stroke | genus. Allisonella. id. 2174    | MR Egger                  | 9  | -1.3300 | 1.0231 | 0.2348 | 0.0649  | 0.0505 | 0.2394 | 7.9249  | 0.4408 | 2.7664  |
| Stroke | genus. Allisonella. id. 2174    | Weighted median           | 9  | 0.0871  | 0.2751 | 0.7516 | 0.0649  | 0.0505 | 0.2394 | 7.9249  | 0.4408 | 2.7664  |
| Stroke | genus. Allisonella. id. 2174    | Inverse variance weighted | 9  | -0.0408 | 0.2037 | 0.8411 | 0.0649  | 0.0505 | 0.2394 | 7.9249  | 0.4408 | 2.7664  |
| Stroke | genus. Allisonella. id. 2174    | Simple mode               | 9  | 0.1931  | 0.4109 | 0.6509 | 0.0649  | 0.0505 | 0.2394 | 7.9249  | 0.4408 | 2.7664  |
| Stroke | genus. Allisonella. id. 2174    | Weighted mode             | 9  | 0.1216  | 0.3665 | 0.7486 | 0.0649  | 0.0505 | 0.2394 | 7.9249  | 0.4408 | 2.7664  |
| Stroke | genus. Alloprevotella. id. 961  | MR Egger                  | 6  | 1.6711  | 1.3038 | 0.2692 | -0.0914 | 0.0683 | 0.2516 | 6.6422  | 0.2486 | 2.6007  |
| Stroke | genus. Alloprevotella. id. 961  | Weighted median           | 6  | -0.0593 | 0.3040 | 0.8454 | -0.0914 | 0.0683 | 0.2516 | 6.6422  | 0.2486 | 2.6007  |
| Stroke | genus. Alloprevotella. id. 961  | Inverse variance weighted | 6  | -0.0416 | 0.2708 | 0.8778 | -0.0914 | 0.0683 | 0.2516 | 6.6422  | 0.2486 | 2.6007  |
| Stroke | genus. Alloprevotella. id. 961  | Simple mode               | 6  | -0.0097 | 0.3779 | 0.9804 | -0.0914 | 0.0683 | 0.2516 | 6.6422  | 0.2486 | 2.6007  |
| Stroke | genus. Alloprevotella. id. 961  | Weighted mode             | 6  | -0.0415 | 0.3850 | 0.9184 | -0.0914 | 0.0683 | 0.2516 | 6.6422  | 0.2486 | 2.6007  |
| Stroke | genus. Anaerofilum. id. 2053    | MR Egger                  | 18 | -0.2761 | 0.5885 | 0.6453 | 0.0171  | 0.0309 | 0.5878 | 15.6020 | 0.4811 | 4.7392  |
| Stroke | genus. Anaerofilum. id. 2053    | Weighted median           | 18 | -0.0984 | 0.1701 | 0.5631 | 0.0171  | 0.0309 | 0.5878 | 15.6020 | 0.4811 | 4.7392  |
| Stroke | genus. Anaerofilum. id. 2053    | Inverse variance weighted | 18 | 0.0427  | 0.1184 | 0.7181 | 0.0171  | 0.0309 | 0.5878 | 15.6020 | 0.4811 | 4.7392  |
| Stroke | genus. Anaerofilum. id. 2053    | Simple mode               | 18 | -0.0681 | 0.3089 | 0.8281 | 0.0171  | 0.0309 | 0.5878 | 15.6020 | 0.4811 | 4.7392  |
| Stroke | genus. Anaerofilum. id. 2053    | Weighted mode             | 18 | -0.1129 | 0.2649 | 0.6754 | 0.0171  | 0.0309 | 0.5878 | 15.6020 | 0.4811 | 4.7392  |
| Stroke | genus. Anaerostipes. id. 1991   | MR Egger                  | 19 | 0.1402  | 0.3103 | 0.6572 | -0.0082 | 0.0165 | 0.6235 | 12.1197 | 0.7928 | 8.1798  |
| Stroke | genus. Anaerostipes. id. 1991   | Weighted median           | 19 | -0.0890 | 0.0875 | 0.3090 | -0.0082 | 0.0165 | 0.6235 | 12.1197 | 0.7928 | 8.1798  |
| Stroke | genus. Anaerostipes. id. 1991   | Inverse variance weighted | 19 | -0.0116 | 0.0647 | 0.8582 | -0.0082 | 0.0165 | 0.6235 | 12.1197 | 0.7928 | 8.1798  |
| Stroke | genus. Anaerostipes. id. 1991   | Simple mode               | 19 | -0.1342 | 0.1409 | 0.3535 | -0.0082 | 0.0165 | 0.6235 | 12.1197 | 0.7928 | 8.1798  |
| Stroke | genus. Anaerostipes. id. 1991   | Weighted mode             | 19 | -0.1236 | 0.1317 | 0.3603 | -0.0082 | 0.0165 | 0.6235 | 12.1197 | 0.7928 | 8.1798  |
| Stroke | genus. Anaerotruncus. id. 2054  | MR Egger                  | 19 | -0.1952 | 0.3137 | 0.5420 | 0.0019  | 0.0166 | 0.9083 | 16.4916 | 0.4893 | 9.1874  |
| Stroke | genus. Anaerotruncus. id. 2054  | Weighted median           | 19 | -0.1434 | 0.0948 | 0.1303 | 0.0019  | 0.0166 | 0.9083 | 16.4916 | 0.4893 | 9.1874  |
| Stroke | genus. Anaerotruncus. id. 2054  | Inverse variance weighted | 19 | -0.1593 | 0.0652 | 0.0146 | 0.0019  | 0.0166 | 0.9083 | 16.4916 | 0.4893 | 9.1874  |
| Stroke | genus. Anaerotruncus. id. 2054  | Simple mode               | 19 | -0.1268 | 0.1618 | 0.4433 | 0.0019  | 0.0166 | 0.9083 | 16.4916 | 0.4893 | 9.1874  |
| Stroke | genus. Anaerotruncus. id. 2054  | Weighted mode             | 19 | -0.1088 | 0.1487 | 0.4740 | 0.0019  | 0.0166 | 0.9083 | 16.4916 | 0.4893 | 9.1874  |
| Stroke | genus. Bacteroides. id. 918     | MR Egger                  | 19 | 0.0220  | 0.3672 | 0.9530 | 0.0022  | 0.0195 | 0.9121 | 25.7463 | 0.0792 | 8.9414  |
| Stroke | genus. Bacteroides. id. 918     | Weighted median           | 19 | 0.0921  | 0.0913 | 0.3132 | 0.0022  | 0.0195 | 0.9121 | 25.7463 | 0.0792 | 8.9414  |
| Stroke | genus. Bacteroides. id. 918     | Inverse variance weighted | 19 | 0.0622  | 0.0744 | 0.4033 | 0.0022  | 0.0195 | 0.9121 | 25.7463 | 0.0792 | 8.9414  |
| Stroke | genus. Bacteroides. id. 918     | Simple mode               | 19 | 0.0987  | 0.1665 | 0.5605 | 0.0022  | 0.0195 | 0.9121 | 25.7463 | 0.0792 | 8.9414  |
| Stroke | genus. Bacteroides. id. 918     | Weighted mode             | 19 | 0.0899  | 0.1675 | 0.5982 | 0.0022  | 0.0195 | 0.9121 | 25.7463 | 0.0792 | 8.9414  |
| Stroke | genus. Barnesiella. id. 944     | MR Egger                  | 19 | 0.3546  | 0.3438 | 0.3169 | -0.0136 | 0.0182 | 0.4670 | 17.5720 | 0.4163 | 9.7059  |
| Stroke | genus. Barnesiella. id. 944     | Weighted median           | 19 | 0.0469  | 0.1018 | 0.6450 | -0.0136 | 0.0182 | 0.4670 | 17.5720 | 0.4163 | 9.7059  |
| Stroke | genus. Barnesiella. id. 944     | Inverse variance weighted | 19 | 0.1043  | 0.0706 | 0.1394 | -0.0136 | 0.0182 | 0.4670 | 17.5720 | 0.4163 | 9.7059  |
| Stroke | genus. Barnesiella. id. 944     | Simple mode               | 19 | -0.1332 | 0.2047 | 0.5234 | -0.0136 | 0.0182 | 0.4670 | 17.5720 | 0.4163 | 9.7059  |
| Stroke | genus. Barnesiella. id. 944     | Weighted mode             | 19 | -0.1029 | 0.1846 | 0.5842 | -0.0136 | 0.0182 | 0.4670 | 17.5720 | 0.4163 | 9.7059  |
| Stroke | genus. Bifidobacterium. id. 436 | MR Egger                  | 19 | 0.4401  | 0.4187 | 0.3079 | -0.0245 | 0.0222 | 0.2856 | 29.2238 | 0.0457 | 5.8589  |
| Stroke | genus. Bifidobacterium. id. 436 | Weighted median           | 19 | 0.0382  | 0.0944 | 0.6853 | -0.0245 | 0.0222 | 0.2856 | 29.2238 | 0.0457 | 5.8589  |
| Stroke | genus. Bifidobacterium. id. 436 | Inverse variance weighted | 19 | -0.0112 | 0.0882 | 0.8985 | -0.0245 | 0.0222 | 0.2856 | 29.2238 | 0.0457 | 5.8589  |
| Stroke | genus. Bifidobacterium. id. 436 | Simple mode               | 19 | 0.0725  | 0.1509 | 0.6368 | -0.0245 | 0.0222 | 0.2856 | 29.2238 | 0.0457 | 5.8589  |
| Stroke | genus. Bifidobacterium. id. 436 | Weighted mode             | 19 | 0.0670  | 0.1337 | 0.6226 | -0.0245 | 0.0222 | 0.2856 | 29.2238 | 0.0457 | 5.8589  |
| Stroke | genus. Bilophila. id. 3170      | MR Egger                  | 19 | -0.0271 | 0.3549 | 0.9400 | 0.0065  | 0.0188 | 0.7342 | 13.7839 | 0.6823 | 14.2239 |
| Stroke | genus. Bilophila. id. 3170      | Weighted median           | 19 | 0.0950  | 0.1093 | 0.3847 | 0.0065  | 0.0188 | 0.7342 | 13.7839 | 0.6823 | 14.2239 |
| Stroke | genus. Bilophila. id. 3170      | Inverse variance weighted | 19 | 0.0927  | 0.0742 | 0.2114 | 0.0065  | 0.0188 | 0.7342 | 13.7839 | 0.6823 | 14.2239 |
| Stroke | genus. Bilophila. id. 3170      | Simple mode               | 19 | 0.1078  | 0.2125 | 0.6181 | 0.0065  | 0.0188 | 0.7342 | 13.7839 | 0.6823 | 14.2239 |
| Stroke | genus. Bilophila. id. 3170      | Weighted mode             | 19 | 0.1145  | 0.2111 | 0.5941 | 0.0065  | 0.0188 | 0.7342 | 13.7839 | 0.6823 | 14.2239 |
| Stroke | genus. Blautia. id. 1992        | MR Egger                  | 19 | -0.2502 | 0.2986 | 0.4137 | 0.0094  | 0.0158 | 0.5590 | 14.4335 | 0.6362 | 11.6172 |
| Stroke | genus. Blautia. id. 1992        | Weighted median           | 19 | -0.1392 | 0.0845 | 0.0995 | 0.0094  | 0.0158 | 0.5590 | 14.4335 | 0.6362 | 11.6172 |
| Stroke | genus. Blautia. id. 1992        | Inverse variance weighted | 19 | -0.0761 | 0.0622 | 0.2212 | 0.0094  | 0.0158 | 0.5590 | 14.4335 | 0.6362 | 11.6172 |
| Stroke | genus. Blautia. id. 1992        | Simple mode               | 19 | -0.1727 | 0.1439 | 0.2456 | 0.0094  | 0.0158 | 0.5590 | 14.4335 | 0.6362 | 11.6172 |
| Stroke | genus. Blautia. id. 1992        | Weighted mode             | 19 | -0.1625 | 0.1329 | 0.2370 | 0.0094  | 0.0158 | 0.5590 | 14.4335 | 0.6362 | 11.6172 |
| Stroke | genus. Butyricicoccus. id. 2055 | MR Egger                  | 19 | 0.0843  | 0.3362 | 0.8051 | -0.0072 | 0.0178 | 0.6915 | 20.1979 | 0.2642 | 8.4706  |
| Stroke | genus. Butyricicoccus. id. 2055 | Weighted median           | 19 | -0.0373 | 0.0876 | 0.6698 | -0.0072 | 0.0178 | 0.6915 | 20.1979 | 0.2642 | 8.4706  |

|        |                                                |                           |    |         |        |        |         |        |        |         |        |         |
|--------|------------------------------------------------|---------------------------|----|---------|--------|--------|---------|--------|--------|---------|--------|---------|
| Stroke | genus. Butyricicoccus. id. 2055                | Inverse variance weighted | 19 | -0.0485 | 0.0684 | 0.4783 | -0.0072 | 0.0178 | 0.6915 | 20.1979 | 0.2642 | 8.4706  |
| Stroke | genus. Butyricicoccus. id. 2055                | Simple mode               | 19 | -0.0279 | 0.1537 | 0.8579 | -0.0072 | 0.0178 | 0.6915 | 20.1979 | 0.2642 | 8.4706  |
| Stroke | genus. Butyricicoccus. id. 2055                | Weighted mode             | 19 | -0.0491 | 0.1373 | 0.7247 | -0.0072 | 0.0178 | 0.6915 | 20.1979 | 0.2642 | 8.4706  |
| Stroke | genus. Butyricimonas. id. 945                  | MR Egger                  | 19 | 0.5317  | 0.3901 | 0.1906 | -0.0252 | 0.0207 | 0.2402 | 13.5000 | 0.7611 | 8.4571  |
| Stroke | genus. Butyricimonas. id. 945                  | Weighted median           | 19 | 0.0826  | 0.1145 | 0.4707 | -0.0252 | 0.0207 | 0.2402 | 13.5000 | 0.7611 | 8.4571  |
| Stroke | genus. Butyricimonas. id. 945                  | Inverse variance weighted | 19 | 0.0674  | 0.0811 | 0.4062 | -0.0252 | 0.0207 | 0.2402 | 13.5000 | 0.7611 | 8.4571  |
| Stroke | genus. Butyricimonas. id. 945                  | Simple mode               | 19 | 0.0595  | 0.1857 | 0.7524 | -0.0252 | 0.0207 | 0.2402 | 13.5000 | 0.7611 | 8.4571  |
| Stroke | genus. Butyricimonas. id. 945                  | Weighted mode             | 19 | 0.1022  | 0.1884 | 0.5944 | -0.0252 | 0.0207 | 0.2402 | 13.5000 | 0.7611 | 8.4571  |
| Stroke | genus. Butyrivibrio. id. 1993                  | MR Egger                  | 18 | -0.4118 | 0.7076 | 0.5687 | 0.0404  | 0.0373 | 0.2945 | 13.2509 | 0.7192 | 2.8433  |
| Stroke | genus. Butyrivibrio. id. 1993                  | Weighted median           | 18 | 0.3643  | 0.1961 | 0.0632 | 0.0404  | 0.0373 | 0.2945 | 13.2509 | 0.7192 | 2.8433  |
| Stroke | genus. Butyrivibrio. id. 1993                  | Inverse variance weighted | 18 | 0.3396  | 0.1418 | 0.0166 | 0.0404  | 0.0373 | 0.2945 | 13.2509 | 0.7192 | 2.8433  |
| Stroke | genus. Butyrivibrio. id. 1993                  | Simple mode               | 18 | 0.6113  | 0.3897 | 0.1352 | 0.0404  | 0.0373 | 0.2945 | 13.2509 | 0.7192 | 2.8433  |
| Stroke | genus. Butyrivibrio. id. 1993                  | Weighted mode             | 18 | 0.0039  | 0.3433 | 0.9911 | 0.0404  | 0.0373 | 0.2945 | 13.2509 | 0.7192 | 2.8433  |
| Stroke | genus. CandidatusSoleaferrea. id. 11350        | MR Egger                  | 18 | 0.2981  | 0.5368 | 0.5864 | -0.0136 | 0.0282 | 0.6377 | 14.9970 | 0.5249 | 5.9725  |
| Stroke | genus. CandidatusSoleaferrea. id. 11350        | Weighted median           | 18 | -0.0523 | 0.1517 | 0.7304 | -0.0136 | 0.0282 | 0.6377 | 14.9970 | 0.5249 | 5.9725  |
| Stroke | genus. CandidatusSoleaferrea. id. 11350        | Inverse variance weighted | 18 | 0.0457  | 0.1078 | 0.6718 | -0.0136 | 0.0282 | 0.6377 | 14.9970 | 0.5249 | 5.9725  |
| Stroke | genus. CandidatusSoleaferrea. id. 11350        | Simple mode               | 18 | -0.1265 | 0.2906 | 0.6688 | -0.0136 | 0.0282 | 0.6377 | 14.9970 | 0.5249 | 5.9725  |
| Stroke | genus. CandidatusSoleaferrea. id. 11350        | Weighted mode             | 18 | -0.1320 | 0.2529 | 0.6086 | -0.0136 | 0.0282 | 0.6377 | 14.9970 | 0.5249 | 5.9725  |
| Stroke | genus. Catenibacterium. id. 2153               | MR Egger                  | 9  | 0.9039  | 1.0825 | 0.4313 | -0.0403 | 0.0535 | 0.4762 | 7.9044  | 0.3411 | 2.7474  |
| Stroke | genus. Catenibacterium. id. 2153               | Weighted median           | 9  | -0.2030 | 0.2910 | 0.4854 | -0.0403 | 0.0535 | 0.4762 | 7.9044  | 0.3411 | 2.7474  |
| Stroke | genus. Catenibacterium. id. 2153               | Inverse variance weighted | 9  | 0.1056  | 0.2105 | 0.6158 | -0.0403 | 0.0535 | 0.4762 | 7.9044  | 0.3411 | 2.7474  |
| Stroke | genus. Catenibacterium. id. 2153               | Simple mode               | 9  | -0.2575 | 0.5440 | 0.6487 | -0.0403 | 0.0535 | 0.4762 | 7.9044  | 0.3411 | 2.7474  |
| Stroke | genus. Catenibacterium. id. 2153               | Weighted mode             | 9  | -0.2859 | 0.5184 | 0.5964 | -0.0403 | 0.0535 | 0.4762 | 7.9044  | 0.3411 | 2.7474  |
| Stroke | genus. ChristensenellaceaeR. 7group. id. 11283 | MR Egger                  | 19 | 0.1159  | 0.3156 | 0.7180 | -0.0087 | 0.0167 | 0.6118 | 13.6561 | 0.6913 | 13.8370 |
| Stroke | genus. ChristensenellaceaeR. 7group. id. 11283 | Weighted median           | 19 | -0.0403 | 0.0933 | 0.6658 | -0.0087 | 0.0167 | 0.6118 | 13.6561 | 0.6913 | 13.8370 |
| Stroke | genus. ChristensenellaceaeR. 7group. id. 11283 | Inverse variance weighted | 19 | -0.0437 | 0.0657 | 0.5059 | -0.0087 | 0.0167 | 0.6118 | 13.6561 | 0.6913 | 13.8370 |
| Stroke | genus. ChristensenellaceaeR. 7group. id. 11283 | Simple mode               | 19 | -0.0471 | 0.1799 | 0.7966 | -0.0087 | 0.0167 | 0.6118 | 13.6561 | 0.6913 | 13.8370 |
| Stroke | genus. ChristensenellaceaeR. 7group. id. 11283 | Weighted mode             | 19 | -0.0471 | 0.1543 | 0.7639 | -0.0087 | 0.0167 | 0.6118 | 13.6561 | 0.6913 | 13.8370 |
| Stroke | genus. Clostridiumsensustrictol. id. 1873      | MR Egger                  | 19 | 0.1691  | 0.4276 | 0.6974 | -0.0112 | 0.0227 | 0.6277 | 26.6901 | 0.0628 | 8.3911  |
| Stroke | genus. Clostridiumsensustrictol. id. 1873      | Weighted median           | 19 | 0.0491  | 0.1081 | 0.6498 | -0.0112 | 0.0227 | 0.6277 | 26.6901 | 0.0628 | 8.3911  |
| Stroke | genus. Clostridiumsensustrictol. id. 1873      | Inverse variance weighted | 19 | -0.0375 | 0.0868 | 0.6656 | -0.0112 | 0.0227 | 0.6277 | 26.6901 | 0.0628 | 8.3911  |
| Stroke | genus. Clostridiumsensustrictol. id. 1873      | Simple mode               | 19 | 0.1478  | 0.2145 | 0.4995 | -0.0112 | 0.0227 | 0.6277 | 26.6901 | 0.0628 | 8.3911  |
| Stroke | genus. Clostridiumsensustrictol. id. 1873      | Weighted mode             | 19 | 0.1287  | 0.1889 | 0.5042 | -0.0112 | 0.0227 | 0.6277 | 26.6901 | 0.0628 | 8.3911  |
| Stroke | genus. Collinsella. id. 815                    | MR Egger                  | 19 | -0.2303 | 0.4671 | 0.6283 | 0.0182  | 0.0248 | 0.4716 | 33.1468 | 0.0108 | 7.5447  |
| Stroke | genus. Collinsella. id. 815                    | Weighted median           | 19 | -0.0392 | 0.0996 | 0.6938 | 0.0182  | 0.0248 | 0.4716 | 33.1468 | 0.0108 | 7.5447  |
| Stroke | genus. Collinsella. id. 815                    | Inverse variance weighted | 19 | 0.1060  | 0.0964 | 0.2716 | 0.0182  | 0.0248 | 0.4716 | 33.1468 | 0.0108 | 7.5447  |
| Stroke | genus. Collinsella. id. 815                    | Simple mode               | 19 | -0.0359 | 0.1546 | 0.8188 | 0.0182  | 0.0248 | 0.4716 | 33.1468 | 0.0108 | 7.5447  |
| Stroke | genus. Collinsella. id. 815                    | Weighted mode             | 19 | -0.0458 | 0.1290 | 0.7266 | 0.0182  | 0.0248 | 0.4716 | 33.1468 | 0.0108 | 7.5447  |
| Stroke | genus. Coprobacter. id. 949                    | MR Egger                  | 18 | 0.2131  | 0.5106 | 0.6819 | -0.0186 | 0.0269 | 0.4991 | 15.6099 | 0.4805 | 6.6283  |
| Stroke | genus. Coprobacter. id. 949                    | Weighted median           | 18 | -0.1381 | 0.1497 | 0.3562 | -0.0186 | 0.0269 | 0.4991 | 15.6099 | 0.4805 | 6.6283  |
| Stroke | genus. Coprobacter. id. 949                    | Inverse variance weighted | 18 | -0.1328 | 0.1024 | 0.1946 | -0.0186 | 0.0269 | 0.4991 | 15.6099 | 0.4805 | 6.6283  |
| Stroke | genus. Coprobacter. id. 949                    | Simple mode               | 18 | -0.1826 | 0.2799 | 0.5228 | -0.0186 | 0.0269 | 0.4991 | 15.6099 | 0.4805 | 6.6283  |
| Stroke | genus. Coprobacter. id. 949                    | Weighted mode             | 18 | -0.2542 | 0.2754 | 0.3689 | -0.0186 | 0.0269 | 0.4991 | 15.6099 | 0.4805 | 6.6283  |
| Stroke | genus. Coprococcus1. id. 11301                 | MR Egger                  | 19 | 0.4579  | 0.3391 | 0.1947 | -0.0258 | 0.0180 | 0.1700 | 22.5370 | 0.2090 | 8.5195  |
| Stroke | genus. Coprococcus1. id. 11301                 | Weighted median           | 19 | 0.0077  | 0.0901 | 0.9320 | -0.0258 | 0.0180 | 0.1700 | 22.5370 | 0.2090 | 8.5195  |
| Stroke | genus. Coprococcus1. id. 11301                 | Inverse variance weighted | 19 | -0.0175 | 0.0727 | 0.8101 | -0.0258 | 0.0180 | 0.1700 | 22.5370 | 0.2090 | 8.5195  |
| Stroke | genus. Coprococcus1. id. 11301                 | Simple mode               | 19 | -0.0378 | 0.1635 | 0.8198 | -0.0258 | 0.0180 | 0.1700 | 22.5370 | 0.2090 | 8.5195  |
| Stroke | genus. Coprococcus1. id. 11301                 | Weighted mode             | 19 | 0.0500  | 0.1292 | 0.7032 | -0.0258 | 0.0180 | 0.1700 | 22.5370 | 0.2090 | 8.5195  |
| Stroke | genus. Coprococcus2. id. 11302                 | MR Egger                  | 19 | 0.3771  | 0.3780 | 0.3323 | -0.0226 | 0.0200 | 0.2749 | 15.1883 | 0.6490 | 8.2872  |
| Stroke | genus. Coprococcus2. id. 11302                 | Weighted median           | 19 | 0.0213  | 0.1118 | 0.8489 | -0.0226 | 0.0200 | 0.2749 | 15.1883 | 0.6490 | 8.2872  |
| Stroke | genus. Coprococcus2. id. 11302                 | Inverse variance weighted | 19 | -0.0400 | 0.0784 | 0.6099 | -0.0226 | 0.0200 | 0.2749 | 15.1883 | 0.6490 | 8.2872  |
| Stroke | genus. Coprococcus2. id. 11302                 | Simple mode               | 19 | 0.0424  | 0.1991 | 0.8338 | -0.0226 | 0.0200 | 0.2749 | 15.1883 | 0.6490 | 8.2872  |
| Stroke | genus. Coprococcus2. id. 11302                 | Weighted mode             | 19 | 0.0613  | 0.1792 | 0.7360 | -0.0226 | 0.0200 | 0.2749 | 15.1883 | 0.6490 | 8.2872  |
| Stroke | genus. Coprococcus3. id. 11303                 | MR Egger                  | 19 | -0.2237 | 0.3926 | 0.5762 | 0.0107  | 0.0208 | 0.6153 | 25.4743 | 0.0846 | 10.1114 |
| Stroke | genus. Coprococcus3. id. 11303                 | Weighted median           | 19 | -0.1013 | 0.0977 | 0.2998 | 0.0107  | 0.0208 | 0.6153 | 25.4743 | 0.0846 | 10.1114 |
| Stroke | genus. Coprococcus3. id. 11303                 | Inverse variance weighted | 19 | -0.0272 | 0.0801 | 0.7340 | 0.0107  | 0.0208 | 0.6153 | 25.4743 | 0.0846 | 10.1114 |
| Stroke | genus. Coprococcus3. id. 11303                 | Simple mode               | 19 | -0.1458 | 0.1606 | 0.3760 | 0.0107  | 0.0208 | 0.6153 | 25.4743 | 0.0846 | 10.1114 |
| Stroke | genus. Coprococcus3. id. 11303                 | Weighted mode             | 19 | -0.0996 | 0.1381 | 0.4799 | 0.0107  | 0.0208 | 0.6153 | 25.4743 | 0.0846 | 10.1114 |

|        |                                             |                           |    |         |        |        |         |        |        |         |        |         |
|--------|---------------------------------------------|---------------------------|----|---------|--------|--------|---------|--------|--------|---------|--------|---------|
| Stroke | genus. DefluviitaleaceaeUCG011. id. 11287   | MR Egger                  | 18 | -0.0422 | 0.5388 | 0.9385 | -0.0023 | 0.0283 | 0.9352 | 21.6753 | 0.1540 | 4.5720  |
| Stroke | genus. DefluviitaleaceaeUCG011. id. 11287   | Weighted median           | 18 | -0.1255 | 0.1339 | 0.3488 | -0.0023 | 0.0283 | 0.9352 | 21.6753 | 0.1540 | 4.5720  |
| Stroke | genus. DefluviitaleaceaeUCG011. id. 11287   | Inverse variance weighted | 18 | -0.0859 | 0.1051 | 0.4138 | -0.0023 | 0.0283 | 0.9352 | 21.6753 | 0.1540 | 4.5720  |
| Stroke | genus. DefluviitaleaceaeUCG011. id. 11287   | Simple mode               | 18 | -0.1584 | 0.2251 | 0.4911 | -0.0023 | 0.0283 | 0.9352 | 21.6753 | 0.1540 | 4.5720  |
| Stroke | genus. DefluviitaleaceaeUCG011. id. 11287   | Weighted mode             | 18 | -0.1695 | 0.1832 | 0.3679 | -0.0023 | 0.0283 | 0.9352 | 21.6753 | 0.1540 | 4.5720  |
| Stroke | genus. Desulfovibrio. id. 3173              | MR Egger                  | 18 | 0.0283  | 0.4385 | 0.9494 | -0.0027 | 0.0231 | 0.9089 | 16.0685 | 0.4482 | 9.6224  |
| Stroke | genus. Desulfovibrio. id. 3173              | Weighted median           | 18 | 0.0135  | 0.1208 | 0.9108 | -0.0027 | 0.0231 | 0.9089 | 16.0685 | 0.4482 | 9.6224  |
| Stroke | genus. Desulfovibrio. id. 3173              | Inverse variance weighted | 18 | -0.0217 | 0.0880 | 0.8052 | -0.0027 | 0.0231 | 0.9089 | 16.0685 | 0.4482 | 9.6224  |
| Stroke | genus. Desulfovibrio. id. 3173              | Simple mode               | 18 | 0.0719  | 0.2044 | 0.7295 | -0.0027 | 0.0231 | 0.9089 | 16.0685 | 0.4482 | 9.6224  |
| Stroke | genus. Desulfovibrio. id. 3173              | Weighted mode             | 18 | 0.0074  | 0.1796 | 0.9676 | -0.0027 | 0.0231 | 0.9089 | 16.0685 | 0.4482 | 9.6224  |
| Stroke | genus. Dialister. id. 2183                  | MR Egger                  | 19 | -0.1974 | 0.3695 | 0.6001 | 0.0067  | 0.0196 | 0.7365 | 17.0480 | 0.4511 | 9.0305  |
| Stroke | genus. Dialister. id. 2183                  | Weighted median           | 19 | -0.1833 | 0.1087 | 0.0919 | 0.0067  | 0.0196 | 0.7365 | 17.0480 | 0.4511 | 9.0305  |
| Stroke | genus. Dialister. id. 2183                  | Inverse variance weighted | 19 | -0.0738 | 0.0768 | 0.3370 | 0.0067  | 0.0196 | 0.7365 | 17.0480 | 0.4511 | 9.0305  |
| Stroke | genus. Dialister. id. 2183                  | Simple mode               | 19 | -0.2012 | 0.2131 | 0.3575 | 0.0067  | 0.0196 | 0.7365 | 17.0480 | 0.4511 | 9.0305  |
| Stroke | genus. Dialister. id. 2183                  | Weighted mode             | 19 | -0.2382 | 0.1817 | 0.2063 | 0.0067  | 0.0196 | 0.7365 | 17.0480 | 0.4511 | 9.0305  |
| Stroke | genus. Dorea. id. 1997                      | MR Egger                  | 19 | 0.3343  | 0.4021 | 0.4173 | -0.0242 | 0.0213 | 0.2717 | 31.9741 | 0.0221 | 6.0238  |
| Stroke | genus. Dorea. id. 1997                      | Weighted median           | 19 | -0.0916 | 0.0947 | 0.3331 | -0.0242 | 0.0213 | 0.2717 | 31.9741 | 0.0221 | 6.0238  |
| Stroke | genus. Dorea. id. 1997                      | Inverse variance weighted | 19 | -0.1125 | 0.0845 | 0.1829 | -0.0242 | 0.0213 | 0.2717 | 31.9741 | 0.0221 | 6.0238  |
| Stroke | genus. Dorea. id. 1997                      | Simple mode               | 19 | -0.2051 | 0.1643 | 0.2280 | -0.0242 | 0.0213 | 0.2717 | 31.9741 | 0.0221 | 6.0238  |
| Stroke | genus. Dorea. id. 1997                      | Weighted mode             | 19 | -0.2151 | 0.1545 | 0.1808 | -0.0242 | 0.0213 | 0.2717 | 31.9741 | 0.0221 | 6.0238  |
| Stroke | genus. Eggerthella. id. 819                 | MR Egger                  | 18 | -0.8151 | 0.8133 | 0.3312 | 0.0503  | 0.0428 | 0.2570 | 33.3201 | 0.0103 | 2.2528  |
| Stroke | genus. Eggerthella. id. 819                 | Weighted median           | 18 | 0.0882  | 0.1864 | 0.6359 | 0.0503  | 0.0428 | 0.2570 | 33.3201 | 0.0103 | 2.2528  |
| Stroke | genus. Eggerthella. id. 819                 | Inverse variance weighted | 18 | 0.1214  | 0.1655 | 0.4633 | 0.0503  | 0.0428 | 0.2570 | 33.3201 | 0.0103 | 2.2528  |
| Stroke | genus. Eggerthella. id. 819                 | Simple mode               | 18 | 0.4831  | 0.3318 | 0.1636 | 0.0503  | 0.0428 | 0.2570 | 33.3201 | 0.0103 | 2.2528  |
| Stroke | genus. Eggerthella. id. 819                 | Weighted mode             | 18 | 0.1393  | 0.2890 | 0.6360 | 0.0503  | 0.0428 | 0.2570 | 33.3201 | 0.0103 | 2.2528  |
| Stroke | genus. Eisenbergiella. id. 11304            | MR Egger                  | 18 | -1.2072 | 0.5597 | 0.0466 | 0.0626  | 0.0295 | 0.0494 | 15.8466 | 0.5347 | 5.1742  |
| Stroke | genus. Eisenbergiella. id. 11304            | Weighted median           | 18 | -0.1708 | 0.1531 | 0.2647 | 0.0626  | 0.0295 | 0.0494 | 15.8466 | 0.5347 | 5.1742  |
| Stroke | genus. Eisenbergiella. id. 11304            | Inverse variance weighted | 18 | -0.0418 | 0.1126 | 0.7102 | 0.0626  | 0.0295 | 0.0494 | 15.8466 | 0.5347 | 5.1742  |
| Stroke | genus. Eisenbergiella. id. 11304            | Simple mode               | 18 | -0.2394 | 0.2957 | 0.4293 | 0.0626  | 0.0295 | 0.0494 | 15.8466 | 0.5347 | 5.1742  |
| Stroke | genus. Eisenbergiella. id. 11304            | Weighted mode             | 18 | -0.2518 | 0.2350 | 0.2989 | 0.0626  | 0.0295 | 0.0494 | 15.8466 | 0.5347 | 5.1742  |
| Stroke | genus. Enterorhabdus. id. 820               | MR Egger                  | 18 | -0.2916 | 0.5149 | 0.5790 | 0.0197  | 0.0271 | 0.4775 | 18.3040 | 0.3064 | 5.5340  |
| Stroke | genus. Enterorhabdus. id. 820               | Weighted median           | 18 | 0.0872  | 0.1365 | 0.5231 | 0.0197  | 0.0271 | 0.4775 | 18.3040 | 0.3064 | 5.5340  |
| Stroke | genus. Enterorhabdus. id. 820               | Inverse variance weighted | 18 | 0.0753  | 0.1021 | 0.4613 | 0.0197  | 0.0271 | 0.4775 | 18.3040 | 0.3064 | 5.5340  |
| Stroke | genus. Enterorhabdus. id. 820               | Simple mode               | 18 | 0.2157  | 0.2724 | 0.4393 | 0.0197  | 0.0271 | 0.4775 | 18.3040 | 0.3064 | 5.5340  |
| Stroke | genus. Enterorhabdus. id. 820               | Weighted mode             | 18 | 0.1986  | 0.2584 | 0.4528 | 0.0197  | 0.0271 | 0.4775 | 18.3040 | 0.3064 | 5.5340  |
| Stroke | genus. Erysipelatoclostridium. id. 11381    | MR Egger                  | 19 | 0.2586  | 0.4078 | 0.5344 | -0.0084 | 0.0216 | 0.7033 | 12.8326 | 0.7473 | 8.4651  |
| Stroke | genus. Erysipelatoclostridium. id. 11381    | Weighted median           | 19 | 0.0750  | 0.1148 | 0.5137 | -0.0084 | 0.0216 | 0.7033 | 12.8326 | 0.7473 | 8.4651  |
| Stroke | genus. Erysipelatoclostridium. id. 11381    | Inverse variance weighted | 19 | 0.1041  | 0.0846 | 0.2187 | -0.0084 | 0.0216 | 0.7033 | 12.8326 | 0.7473 | 8.4651  |
| Stroke | genus. Erysipelatoclostridium. id. 11381    | Simple mode               | 19 | 0.1080  | 0.2046 | 0.6040 | -0.0084 | 0.0216 | 0.7033 | 12.8326 | 0.7473 | 8.4651  |
| Stroke | genus. Erysipelatoclostridium. id. 11381    | Weighted mode             | 19 | 0.0606  | 0.1747 | 0.7328 | -0.0084 | 0.0216 | 0.7033 | 12.8326 | 0.7473 | 8.4651  |
| Stroke | genus. ErysipelotrichaceaeUCG003. id. 11384 | MR Egger                  | 19 | 0.0359  | 0.3592 | 0.9216 | -0.0014 | 0.0190 | 0.9414 | 20.0268 | 0.2729 | 5.5801  |
| Stroke | genus. ErysipelotrichaceaeUCG003. id. 11384 | Weighted median           | 19 | 0.0158  | 0.1006 | 0.8752 | -0.0014 | 0.0190 | 0.9414 | 20.0268 | 0.2729 | 5.5801  |
| Stroke | genus. ErysipelotrichaceaeUCG003. id. 11384 | Inverse variance weighted | 19 | 0.0097  | 0.0726 | 0.8940 | -0.0014 | 0.0190 | 0.9414 | 20.0268 | 0.2729 | 5.5801  |
| Stroke | genus. ErysipelotrichaceaeUCG003. id. 11384 | Simple mode               | 19 | 0.0183  | 0.1827 | 0.9214 | -0.0014 | 0.0190 | 0.9414 | 20.0268 | 0.2729 | 5.5801  |
| Stroke | genus. ErysipelotrichaceaeUCG003. id. 11384 | Weighted mode             | 19 | -0.0024 | 0.1518 | 0.9875 | -0.0014 | 0.0190 | 0.9414 | 20.0268 | 0.2729 | 5.5801  |
| Stroke | genus. Escherichia. Shigella. id. 3504      | MR Egger                  | 19 | -0.3332 | 0.3709 | 0.3816 | 0.0157  | 0.0197 | 0.4355 | 11.4549 | 0.8320 | 14.4006 |
| Stroke | genus. Escherichia. Shigella. id. 3504      | Weighted median           | 19 | -0.1106 | 0.1003 | 0.2700 | 0.0157  | 0.0197 | 0.4355 | 11.4549 | 0.8320 | 14.4006 |
| Stroke | genus. Escherichia. Shigella. id. 3504      | Inverse variance weighted | 19 | -0.0434 | 0.0771 | 0.5730 | 0.0157  | 0.0197 | 0.4355 | 11.4549 | 0.8320 | 14.4006 |
| Stroke | genus. Escherichia. Shigella. id. 3504      | Simple mode               | 19 | -0.1367 | 0.1764 | 0.4486 | 0.0157  | 0.0197 | 0.4355 | 11.4549 | 0.8320 | 14.4006 |
| Stroke | genus. Escherichia. Shigella. id. 3504      | Weighted mode             | 19 | -0.1401 | 0.1492 | 0.3603 | 0.0157  | 0.0197 | 0.4355 | 11.4549 | 0.8320 | 14.4006 |
| Stroke | genus. Faecalibacterium. id. 2057           | MR Egger                  | 19 | -0.1957 | 0.3469 | 0.5800 | 0.0040  | 0.0184 | 0.8312 | 22.6924 | 0.1595 | 5.4811  |
| Stroke | genus. Faecalibacterium. id. 2057           | Weighted median           | 19 | -0.1998 | 0.0877 | 0.0227 | 0.0040  | 0.0184 | 0.8312 | 22.6924 | 0.1595 | 5.4811  |
| Stroke | genus. Faecalibacterium. id. 2057           | Inverse variance weighted | 19 | -0.1223 | 0.0703 | 0.0821 | 0.0040  | 0.0184 | 0.8312 | 22.6924 | 0.1595 | 5.4811  |
| Stroke | genus. Faecalibacterium. id. 2057           | Simple mode               | 19 | -0.2946 | 0.1508 | 0.0664 | 0.0040  | 0.0184 | 0.8312 | 22.6924 | 0.1595 | 5.4811  |
| Stroke | genus. Faecalibacterium. id. 2057           | Weighted mode             | 19 | -0.2708 | 0.1192 | 0.0356 | 0.0040  | 0.0184 | 0.8312 | 22.6924 | 0.1595 | 5.4811  |
| Stroke | genus. FamilyXIIIAD3011group. id. 11293     | MR Egger                  | 19 | 0.0689  | 0.3389 | 0.8414 | -0.0033 | 0.0180 | 0.8556 | 16.7608 | 0.4707 | 11.4261 |
| Stroke | genus. FamilyXIIIAD3011group. id. 11293     | Weighted median           | 19 | -0.0484 | 0.1030 | 0.6383 | -0.0033 | 0.0180 | 0.8556 | 16.7608 | 0.4707 | 11.4261 |
| Stroke | genus. FamilyXIIIAD3011group. id. 11293     | Inverse variance weighted | 19 | 0.0076  | 0.0704 | 0.9136 | -0.0033 | 0.0180 | 0.8556 | 16.7608 | 0.4707 | 11.4261 |

|        |                                      |                           |    |         |        |        |         |        |        |         |        |         |
|--------|--------------------------------------|---------------------------|----|---------|--------|--------|---------|--------|--------|---------|--------|---------|
| Stroke | genus.FamilyXIIIAD3011group.id.11293 | Simple mode               | 19 | -0.1244 | 0.1849 | 0.5097 | -0.0033 | 0.0180 | 0.8556 | 16.7608 | 0.4707 | 11.4261 |
| Stroke | genus.FamilyXIIIAD3011group.id.11293 | Weighted mode             | 19 | -0.0987 | 0.1872 | 0.6044 | -0.0033 | 0.0180 | 0.8556 | 16.7608 | 0.4707 | 11.4261 |
| Stroke | genus.FamilyXIIIUCG001.id.11294      | MR Egger                  | 19 | -0.2173 | 0.3772 | 0.5722 | 0.0109  | 0.0200 | 0.5917 | 18.7948 | 0.3404 | 11.0995 |
| Stroke | genus.FamilyXIIIUCG001.id.11294      | Weighted median           | 19 | -0.0146 | 0.1017 | 0.8857 | 0.0109  | 0.0200 | 0.5917 | 18.7948 | 0.3404 | 11.0995 |
| Stroke | genus.FamilyXIIIUCG001.id.11294      | Inverse variance weighted | 19 | -0.0155 | 0.0764 | 0.8393 | 0.0109  | 0.0200 | 0.5917 | 18.7948 | 0.3404 | 11.0995 |
| Stroke | genus.FamilyXIIIUCG001.id.11294      | Simple mode               | 19 | 0.0036  | 0.1991 | 0.9856 | 0.0109  | 0.0200 | 0.5917 | 18.7948 | 0.3404 | 11.0995 |
| Stroke | genus.FamilyXIIIUCG001.id.11294      | Weighted mode             | 19 | -0.1078 | 0.1968 | 0.5904 | 0.0109  | 0.0200 | 0.5917 | 18.7948 | 0.3404 | 11.0995 |
| Stroke | genus.Flavonifractor.id.2059         | MR Egger                  | 19 | -0.1553 | 0.4868 | 0.7536 | 0.0051  | 0.0258 | 0.8457 | 26.6999 | 0.0626 | 6.4823  |
| Stroke | genus.Flavonifractor.id.2059         | Weighted median           | 19 | -0.0344 | 0.1162 | 0.7673 | 0.0051  | 0.0258 | 0.8457 | 26.6999 | 0.0626 | 6.4823  |
| Stroke | genus.Flavonifractor.id.2059         | Inverse variance weighted | 19 | -0.0612 | 0.0988 | 0.5354 | 0.0051  | 0.0258 | 0.8457 | 26.6999 | 0.0626 | 6.4823  |
| Stroke | genus.Flavonifractor.id.2059         | Simple mode               | 19 | -0.0346 | 0.2110 | 0.8716 | 0.0051  | 0.0258 | 0.8457 | 26.6999 | 0.0626 | 6.4823  |
| Stroke | genus.Flavonifractor.id.2059         | Weighted mode             | 19 | -0.0451 | 0.1944 | 0.8193 | 0.0051  | 0.0258 | 0.8457 | 26.6999 | 0.0626 | 6.4823  |
| Stroke | genus.Fusicatenibacter.id.11305      | MR Egger                  | 19 | -0.0473 | 0.3904 | 0.9050 | 0.0016  | 0.0207 | 0.9386 | 27.6395 | 0.0493 | 9.0012  |
| Stroke | genus.Fusicatenibacter.id.11305      | Weighted median           | 19 | -0.0515 | 0.0983 | 0.6006 | 0.0016  | 0.0207 | 0.9386 | 27.6395 | 0.0493 | 9.0012  |
| Stroke | genus.Fusicatenibacter.id.11305      | Inverse variance weighted | 19 | -0.0175 | 0.0790 | 0.8252 | 0.0016  | 0.0207 | 0.9386 | 27.6395 | 0.0493 | 9.0012  |
| Stroke | genus.Fusicatenibacter.id.11305      | Simple mode               | 19 | -0.0377 | 0.1847 | 0.8408 | 0.0016  | 0.0207 | 0.9386 | 27.6395 | 0.0493 | 9.0012  |
| Stroke | genus.Fusicatenibacter.id.11305      | Weighted mode             | 19 | 0.0026  | 0.1483 | 0.9862 | 0.0016  | 0.0207 | 0.9386 | 27.6395 | 0.0493 | 9.0012  |
| Stroke | genus.Gordonibacter.id.821           | MR Egger                  | 18 | 1.2510  | 0.7480 | 0.1139 | -0.0818 | 0.0393 | 0.0539 | 24.0372 | 0.1184 | 2.4836  |
| Stroke | genus.Gordonibacter.id.821           | Weighted median           | 18 | -0.1484 | 0.2087 | 0.4770 | -0.0818 | 0.0393 | 0.0539 | 24.0372 | 0.1184 | 2.4836  |
| Stroke | genus.Gordonibacter.id.821           | Inverse variance weighted | 18 | -0.2736 | 0.1645 | 0.0963 | -0.0818 | 0.0393 | 0.0539 | 24.0372 | 0.1184 | 2.4836  |
| Stroke | genus.Gordonibacter.id.821           | Simple mode               | 18 | -0.1680 | 0.3605 | 0.6470 | -0.0818 | 0.0393 | 0.0539 | 24.0372 | 0.1184 | 2.4836  |
| Stroke | genus.Gordonibacter.id.821           | Weighted mode             | 18 | -0.1305 | 0.3791 | 0.7350 | -0.0818 | 0.0393 | 0.0539 | 24.0372 | 0.1184 | 2.4836  |
| Stroke | genus.Haemophilus.id.3698            | MR Egger                  | 19 | 1.0215  | 0.4238 | 0.0276 | -0.0526 | 0.0225 | 0.0318 | 14.6309 | 0.6871 | 10.0346 |
| Stroke | genus.Haemophilus.id.3698            | Weighted median           | 19 | 0.0843  | 0.1185 | 0.4768 | -0.0526 | 0.0225 | 0.0318 | 14.6309 | 0.6871 | 10.0346 |
| Stroke | genus.Haemophilus.id.3698            | Inverse variance weighted | 19 | 0.0517  | 0.0884 | 0.5585 | -0.0526 | 0.0225 | 0.0318 | 14.6309 | 0.6871 | 10.0346 |
| Stroke | genus.Haemophilus.id.3698            | Simple mode               | 19 | 0.0335  | 0.1852 | 0.8584 | -0.0526 | 0.0225 | 0.0318 | 14.6309 | 0.6871 | 10.0346 |
| Stroke | genus.Haemophilus.id.3698            | Weighted mode             | 19 | 0.0518  | 0.1577 | 0.7465 | -0.0526 | 0.0225 | 0.0318 | 14.6309 | 0.6871 | 10.0346 |
| Stroke | genus.Holdemanella.id.11393          | MR Egger                  | 18 | 0.4237  | 0.6019 | 0.4916 | -0.0219 | 0.0317 | 0.4990 | 25.0055 | 0.0697 | 4.5275  |
| Stroke | genus.Holdemanella.id.11393          | Weighted median           | 18 | 0.1642  | 0.1474 | 0.2652 | -0.0219 | 0.0317 | 0.4990 | 25.0055 | 0.0697 | 4.5275  |
| Stroke | genus.Holdemanella.id.11393          | Inverse variance weighted | 18 | 0.0159  | 0.1192 | 0.8942 | -0.0219 | 0.0317 | 0.4990 | 25.0055 | 0.0697 | 4.5275  |
| Stroke | genus.Holdemanella.id.11393          | Simple mode               | 18 | 0.2970  | 0.2620 | 0.2728 | -0.0219 | 0.0317 | 0.4990 | 25.0055 | 0.0697 | 4.5275  |
| Stroke | genus.Holdemanella.id.11393          | Weighted mode             | 18 | 0.2291  | 0.2131 | 0.2973 | -0.0219 | 0.0317 | 0.4990 | 25.0055 | 0.0697 | 4.5275  |
| Stroke | genus.Holdemania.id.2157             | MR Egger                  | 18 | 0.2096  | 0.4397 | 0.6401 | -0.0103 | 0.0231 | 0.6625 | 11.5688 | 0.7731 | 9.0027  |
| Stroke | genus.Holdemania.id.2157             | Weighted median           | 18 | 0.0568  | 0.1192 | 0.6335 | -0.0103 | 0.0231 | 0.6625 | 11.5688 | 0.7731 | 9.0027  |
| Stroke | genus.Holdemania.id.2157             | Inverse variance weighted | 18 | 0.0180  | 0.0884 | 0.8386 | -0.0103 | 0.0231 | 0.6625 | 11.5688 | 0.7731 | 9.0027  |
| Stroke | genus.Holdemania.id.2157             | Simple mode               | 18 | 0.1390  | 0.2113 | 0.5194 | -0.0103 | 0.0231 | 0.6625 | 11.5688 | 0.7731 | 9.0027  |
| Stroke | genus.Holdemania.id.2157             | Weighted mode             | 18 | 0.1526  | 0.1722 | 0.3878 | -0.0103 | 0.0231 | 0.6625 | 11.5688 | 0.7731 | 9.0027  |
| Stroke | genus.Howardella.id.2000             | MR Egger                  | 18 | -0.2567 | 0.6858 | 0.7131 | 0.0046  | 0.0361 | 0.9010 | 14.0074 | 0.5982 | 3.3746  |
| Stroke | genus.Howardella.id.2000             | Weighted median           | 18 | -0.0807 | 0.1916 | 0.6735 | 0.0046  | 0.0361 | 0.9010 | 14.0074 | 0.5982 | 3.3746  |
| Stroke | genus.Howardella.id.2000             | Inverse variance weighted | 18 | -0.1718 | 0.1379 | 0.2129 | 0.0046  | 0.0361 | 0.9010 | 14.0074 | 0.5982 | 3.3746  |
| Stroke | genus.Howardella.id.2000             | Simple mode               | 18 | 0.2247  | 0.3731 | 0.5549 | 0.0046  | 0.0361 | 0.9010 | 14.0074 | 0.5982 | 3.3746  |
| Stroke | genus.Howardella.id.2000             | Weighted mode             | 18 | 0.0102  | 0.3074 | 0.9739 | 0.0046  | 0.0361 | 0.9010 | 14.0074 | 0.5982 | 3.3746  |
| Stroke | genus.Hungatella.id.11306            | MR Egger                  | 18 | -0.4989 | 0.7905 | 0.5369 | 0.0303  | 0.0416 | 0.4770 | 23.5176 | 0.1006 | 2.4711  |
| Stroke | genus.Hungatella.id.11306            | Weighted median           | 18 | 0.0220  | 0.1834 | 0.9047 | 0.0303  | 0.0416 | 0.4770 | 23.5176 | 0.1006 | 2.4711  |
| Stroke | genus.Hungatella.id.11306            | Inverse variance weighted | 18 | 0.0651  | 0.1563 | 0.6772 | 0.0303  | 0.0416 | 0.4770 | 23.5176 | 0.1006 | 2.4711  |
| Stroke | genus.Hungatella.id.11306            | Simple mode               | 18 | 0.0877  | 0.2927 | 0.7680 | 0.0303  | 0.0416 | 0.4770 | 23.5176 | 0.1006 | 2.4711  |
| Stroke | genus.Hungatella.id.11306            | Weighted mode             | 18 | 0.0677  | 0.2674 | 0.8032 | 0.0303  | 0.0416 | 0.4770 | 23.5176 | 0.1006 | 2.4711  |
| Stroke | genus.Intestinibacter.id.11345       | MR Egger                  | 19 | 0.7555  | 0.3721 | 0.0583 | -0.0399 | 0.0197 | 0.0588 | 22.0629 | 0.2292 | 8.6406  |
| Stroke | genus.Intestinibacter.id.11345       | Weighted median           | 19 | -0.0096 | 0.1140 | 0.9330 | -0.0399 | 0.0197 | 0.0588 | 22.0629 | 0.2292 | 8.6406  |
| Stroke | genus.Intestinibacter.id.11345       | Inverse variance weighted | 19 | 0.0182  | 0.0836 | 0.8276 | -0.0399 | 0.0197 | 0.0588 | 22.0629 | 0.2292 | 8.6406  |
| Stroke | genus.Intestinibacter.id.11345       | Simple mode               | 19 | -0.1732 | 0.2244 | 0.4502 | -0.0399 | 0.0197 | 0.0588 | 22.0629 | 0.2292 | 8.6406  |
| Stroke | genus.Intestinibacter.id.11345       | Weighted mode             | 19 | -0.0364 | 0.1990 | 0.8569 | -0.0399 | 0.0197 | 0.0588 | 22.0629 | 0.2292 | 8.6406  |
| Stroke | genus.Intestinimonas.id.2062         | MR Egger                  | 19 | 0.1224  | 0.4361 | 0.7823 | -0.0054 | 0.0231 | 0.8190 | 23.9066 | 0.1220 | 3.8583  |
| Stroke | genus.Intestinimonas.id.2062         | Weighted median           | 19 | 0.0825  | 0.1128 | 0.4646 | -0.0054 | 0.0231 | 0.8190 | 23.9066 | 0.1220 | 3.8583  |
| Stroke | genus.Intestinimonas.id.2062         | Inverse variance weighted | 19 | 0.0233  | 0.0882 | 0.7919 | -0.0054 | 0.0231 | 0.8190 | 23.9066 | 0.1220 | 3.8583  |
| Stroke | genus.Intestinimonas.id.2062         | Simple mode               | 19 | 0.0989  | 0.1889 | 0.6069 | -0.0054 | 0.0231 | 0.8190 | 23.9066 | 0.1220 | 3.8583  |
| Stroke | genus.Intestinimonas.id.2062         | Weighted mode             | 19 | 0.0771  | 0.1838 | 0.6799 | -0.0054 | 0.0231 | 0.8190 | 23.9066 | 0.1220 | 3.8583  |
| Stroke | genus.Lachnoclostridium.id.11308     | MR Egger                  | 19 | -0.1913 | 0.3163 | 0.5532 | 0.0047  | 0.0168 | 0.7815 | 18.6990 | 0.3461 | 10.8913 |

|        |                                            |                           |    |         |        |        |         |        |        |         |        |         |
|--------|--------------------------------------------|---------------------------|----|---------|--------|--------|---------|--------|--------|---------|--------|---------|
| Stroke | genus.Lachnoclostridium.id.11308           | Weighted median           | 19 | -0.1592 | 0.0929 | 0.0864 | 0.0047  | 0.0168 | 0.7815 | 18.6990 | 0.3461 | 10.8913 |
| Stroke | genus.Lachnoclostridium.id.11308           | Inverse variance weighted | 19 | -0.1042 | 0.0642 | 0.1046 | 0.0047  | 0.0168 | 0.7815 | 18.6990 | 0.3461 | 10.8913 |
| Stroke | genus.Lachnoclostridium.id.11308           | Simple mode               | 19 | -0.1829 | 0.1551 | 0.2536 | 0.0047  | 0.0168 | 0.7815 | 18.6990 | 0.3461 | 10.8913 |
| Stroke | genus.Lachnoclostridium.id.11308           | Weighted mode             | 19 | -0.2048 | 0.1495 | 0.1878 | 0.0047  | 0.0168 | 0.7815 | 18.6990 | 0.3461 | 10.8913 |
| Stroke | genus.Lachnospira.id.2004                  | MR Egger                  | 19 | -0.0640 | 0.3143 | 0.8411 | 0.0012  | 0.0167 | 0.9429 | 16.7318 | 0.4727 | 13.9226 |
| Stroke | genus.Lachnospira.id.2004                  | Weighted median           | 19 | -0.0214 | 0.0925 | 0.8167 | 0.0012  | 0.0167 | 0.9429 | 16.7318 | 0.4727 | 13.9226 |
| Stroke | genus.Lachnospira.id.2004                  | Inverse variance weighted | 19 | -0.0416 | 0.0655 | 0.5252 | 0.0012  | 0.0167 | 0.9429 | 16.7318 | 0.4727 | 13.9226 |
| Stroke | genus.Lachnospira.id.2004                  | Simple mode               | 19 | -0.2319 | 0.1639 | 0.1741 | 0.0012  | 0.0167 | 0.9429 | 16.7318 | 0.4727 | 13.9226 |
| Stroke | genus.Lachnospira.id.2004                  | Weighted mode             | 19 | -0.1809 | 0.1523 | 0.2503 | 0.0012  | 0.0167 | 0.9429 | 16.7318 | 0.4727 | 13.9226 |
| Stroke | genus.LachnospiraceaeFCS020group.id.11314  | MR Egger                  | 19 | 0.4257  | 0.4295 | 0.3355 | -0.0234 | 0.0228 | 0.3175 | 28.2671 | 0.0581 | 8.1240  |
| Stroke | genus.LachnospiraceaeFCS020group.id.11314  | Weighted median           | 19 | -0.0852 | 0.0999 | 0.3936 | -0.0234 | 0.0228 | 0.3175 | 28.2671 | 0.0581 | 8.1240  |
| Stroke | genus.LachnospiraceaeFCS020group.id.11314  | Inverse variance weighted | 19 | -0.0070 | 0.0894 | 0.9380 | -0.0234 | 0.0228 | 0.3175 | 28.2671 | 0.0581 | 8.1240  |
| Stroke | genus.LachnospiraceaeFCS020group.id.11314  | Simple mode               | 19 | -0.1515 | 0.1644 | 0.3690 | -0.0234 | 0.0228 | 0.3175 | 28.2671 | 0.0581 | 8.1240  |
| Stroke | genus.LachnospiraceaeFCS020group.id.11314  | Weighted mode             | 19 | -0.1419 | 0.1516 | 0.3616 | -0.0234 | 0.0228 | 0.3175 | 28.2671 | 0.0581 | 8.1240  |
| Stroke | genus.LachnospiraceaeNC2004group.id.11316  | MR Egger                  | 18 | -0.1561 | 0.6629 | 0.8168 | 0.0036  | 0.0349 | 0.9187 | 24.0937 | 0.0875 | 4.1243  |
| Stroke | genus.LachnospiraceaeNC2004group.id.11316  | Weighted median           | 18 | 0.0798  | 0.1607 | 0.6196 | 0.0036  | 0.0349 | 0.9187 | 24.0937 | 0.0875 | 4.1243  |
| Stroke | genus.LachnospiraceaeNC2004group.id.11316  | Inverse variance weighted | 18 | -0.0887 | 0.1293 | 0.4924 | 0.0036  | 0.0349 | 0.9187 | 24.0937 | 0.0875 | 4.1243  |
| Stroke | genus.LachnospiraceaeNC2004group.id.11316  | Simple mode               | 18 | 0.0818  | 0.2674 | 0.7634 | 0.0036  | 0.0349 | 0.9187 | 24.0937 | 0.0875 | 4.1243  |
| Stroke | genus.LachnospiraceaeNC2004group.id.11316  | Weighted mode             | 18 | 0.1417  | 0.2468 | 0.5732 | 0.0036  | 0.0349 | 0.9187 | 24.0937 | 0.0875 | 4.1243  |
| Stroke | genus.LachnospiraceaeND3007group.id.11317  | MR Egger                  | 19 | 0.6468  | 0.3261 | 0.0637 | -0.0320 | 0.0173 | 0.0817 | 14.4234 | 0.7011 | 14.1328 |
| Stroke | genus.LachnospiraceaeND3007group.id.11317  | Weighted median           | 19 | 0.1467  | 0.0948 | 0.1217 | -0.0320 | 0.0173 | 0.0817 | 14.4234 | 0.7011 | 14.1328 |
| Stroke | genus.LachnospiraceaeND3007group.id.11317  | Inverse variance weighted | 19 | 0.0567  | 0.0680 | 0.4040 | -0.0320 | 0.0173 | 0.0817 | 14.4234 | 0.7011 | 14.1328 |
| Stroke | genus.LachnospiraceaeND3007group.id.11317  | Simple mode               | 19 | 0.1665  | 0.1660 | 0.3291 | -0.0320 | 0.0173 | 0.0817 | 14.4234 | 0.7011 | 14.1328 |
| Stroke | genus.LachnospiraceaeND3007group.id.11317  | Weighted mode             | 19 | 0.1941  | 0.1359 | 0.1703 | -0.0320 | 0.0173 | 0.0817 | 14.4234 | 0.7011 | 14.1328 |
| Stroke | genus.LachnospiraceaeNK4A136group.id.11319 | MR Egger                  | 19 | -0.1350 | 0.3593 | 0.7117 | 0.0056  | 0.0191 | 0.7726 | 23.1926 | 0.1431 | 8.7594  |
| Stroke | genus.LachnospiraceaeNK4A136group.id.11319 | Weighted median           | 19 | -0.1297 | 0.0923 | 0.1600 | 0.0056  | 0.0191 | 0.7726 | 23.1926 | 0.1431 | 8.7594  |
| Stroke | genus.LachnospiraceaeNK4A136group.id.11319 | Inverse variance weighted | 19 | -0.0318 | 0.0729 | 0.6623 | 0.0056  | 0.0191 | 0.7726 | 23.1926 | 0.1431 | 8.7594  |
| Stroke | genus.LachnospiraceaeNK4A136group.id.11319 | Simple mode               | 19 | -0.1250 | 0.1921 | 0.5236 | 0.0056  | 0.0191 | 0.7726 | 23.1926 | 0.1431 | 8.7594  |
| Stroke | genus.LachnospiraceaeNK4A136group.id.11319 | Weighted mode             | 19 | -0.1453 | 0.1510 | 0.3487 | 0.0056  | 0.0191 | 0.7726 | 23.1926 | 0.1431 | 8.7594  |
| Stroke | genus.LachnospiraceaeUCG001.id.11321       | MR Egger                  | 19 | 0.0772  | 0.3980 | 0.8485 | -0.0090 | 0.0211 | 0.6767 | 12.4732 | 0.7707 | 9.8192  |
| Stroke | genus.LachnospiraceaeUCG001.id.11321       | Weighted median           | 19 | -0.0501 | 0.1105 | 0.6502 | -0.0090 | 0.0211 | 0.6767 | 12.4732 | 0.7707 | 9.8192  |
| Stroke | genus.LachnospiraceaeUCG001.id.11321       | Inverse variance weighted | 19 | -0.0880 | 0.0828 | 0.2881 | -0.0090 | 0.0211 | 0.6767 | 12.4732 | 0.7707 | 9.8192  |
| Stroke | genus.LachnospiraceaeUCG001.id.11321       | Simple mode               | 19 | -0.0533 | 0.1903 | 0.7828 | -0.0090 | 0.0211 | 0.6767 | 12.4732 | 0.7707 | 9.8192  |
| Stroke | genus.LachnospiraceaeUCG001.id.11321       | Weighted mode             | 19 | -0.0448 | 0.1573 | 0.7793 | -0.0090 | 0.0211 | 0.6767 | 12.4732 | 0.7707 | 9.8192  |
| Stroke | genus.LachnospiraceaeUCG004.id.11324       | MR Egger                  | 19 | 0.3294  | 0.3349 | 0.3392 | -0.0174 | 0.0178 | 0.3419 | 13.4132 | 0.7665 | 14.3485 |
| Stroke | genus.LachnospiraceaeUCG004.id.11324       | Weighted median           | 19 | 0.0204  | 0.0989 | 0.8370 | -0.0174 | 0.0178 | 0.3419 | 13.4132 | 0.7665 | 14.3485 |
| Stroke | genus.LachnospiraceaeUCG004.id.11324       | Inverse variance weighted | 19 | 0.0091  | 0.0700 | 0.8962 | -0.0174 | 0.0178 | 0.3419 | 13.4132 | 0.7665 | 14.3485 |
| Stroke | genus.LachnospiraceaeUCG004.id.11324       | Simple mode               | 19 | 0.0679  | 0.1915 | 0.7270 | -0.0174 | 0.0178 | 0.3419 | 13.4132 | 0.7665 | 14.3485 |
| Stroke | genus.LachnospiraceaeUCG004.id.11324       | Weighted mode             | 19 | 0.0976  | 0.1602 | 0.5501 | -0.0174 | 0.0178 | 0.3419 | 13.4132 | 0.7665 | 14.3485 |
| Stroke | genus.LachnospiraceaeUCG008.id.11328       | MR Egger                  | 18 | 0.3912  | 0.5042 | 0.4492 | -0.0237 | 0.0265 | 0.3860 | 10.1965 | 0.8952 | 7.9972  |
| Stroke | genus.LachnospiraceaeUCG008.id.11328       | Weighted median           | 18 | 0.0092  | 0.1413 | 0.9480 | -0.0237 | 0.0265 | 0.3860 | 10.1965 | 0.8952 | 7.9972  |
| Stroke | genus.LachnospiraceaeUCG008.id.11328       | Inverse variance weighted | 18 | -0.0491 | 0.1015 | 0.6287 | -0.0237 | 0.0265 | 0.3860 | 10.1965 | 0.8952 | 7.9972  |
| Stroke | genus.LachnospiraceaeUCG008.id.11328       | Simple mode               | 18 | -0.0529 | 0.2393 | 0.8277 | -0.0237 | 0.0265 | 0.3860 | 10.1965 | 0.8952 | 7.9972  |
| Stroke | genus.LachnospiraceaeUCG008.id.11328       | Weighted mode             | 18 | 0.0119  | 0.2040 | 0.9542 | -0.0237 | 0.0265 | 0.3860 | 10.1965 | 0.8952 | 7.9972  |
| Stroke | genus.LachnospiraceaeUCG010.id.11330       | MR Egger                  | 19 | -0.7195 | 0.5366 | 0.1976 | 0.0425  | 0.0284 | 0.1539 | 44.6746 | 0.0005 | 3.1788  |
| Stroke | genus.LachnospiraceaeUCG010.id.11330       | Weighted median           | 19 | 0.1331  | 0.1165 | 0.2533 | 0.0425  | 0.0284 | 0.1539 | 44.6746 | 0.0005 | 3.1788  |
| Stroke | genus.LachnospiraceaeUCG010.id.11330       | Inverse variance weighted | 19 | 0.0638  | 0.1153 | 0.5799 | 0.0425  | 0.0284 | 0.1539 | 44.6746 | 0.0005 | 3.1788  |
| Stroke | genus.LachnospiraceaeUCG010.id.11330       | Simple mode               | 19 | -0.1814 | 0.2533 | 0.4831 | 0.0425  | 0.0284 | 0.1539 | 44.6746 | 0.0005 | 3.1788  |
| Stroke | genus.LachnospiraceaeUCG010.id.11330       | Weighted mode             | 19 | 0.1899  | 0.2028 | 0.3615 | 0.0425  | 0.0284 | 0.1539 | 44.6746 | 0.0005 | 3.1788  |
| Stroke | genus.Lactobacillus.id.1837                | MR Egger                  | 18 | 0.1120  | 0.5489 | 0.8408 | -0.0096 | 0.0289 | 0.7449 | 18.5629 | 0.2920 | 4.7294  |
| Stroke | genus.Lactobacillus.id.1837                | Weighted median           | 18 | -0.0376 | 0.1459 | 0.7965 | -0.0096 | 0.0289 | 0.7449 | 18.5629 | 0.2920 | 4.7294  |
| Stroke | genus.Lactobacillus.id.1837                | Inverse variance weighted | 18 | -0.0660 | 0.1073 | 0.5383 | -0.0096 | 0.0289 | 0.7449 | 18.5629 | 0.2920 | 4.7294  |
| Stroke | genus.Lactobacillus.id.1837                | Simple mode               | 18 | 0.0962  | 0.2739 | 0.7299 | -0.0096 | 0.0289 | 0.7449 | 18.5629 | 0.2920 | 4.7294  |
| Stroke | genus.Lactobacillus.id.1837                | Weighted mode             | 18 | 0.0001  | 0.2448 | 0.9996 | -0.0096 | 0.0289 | 0.7449 | 18.5629 | 0.2920 | 4.7294  |
| Stroke | genus.Lactococcus.id.1851                  | MR Egger                  | 18 | 0.3989  | 0.8348 | 0.6392 | -0.0182 | 0.0439 | 0.6839 | 25.3151 | 0.0645 | 2.7606  |
| Stroke | genus.Lactococcus.id.1851                  | Weighted median           | 18 | -0.1791 | 0.1967 | 0.3626 | -0.0182 | 0.0439 | 0.6839 | 25.3151 | 0.0645 | 2.7606  |
| Stroke | genus.Lactococcus.id.1851                  | Inverse variance weighted | 18 | 0.0598  | 0.1630 | 0.7139 | -0.0182 | 0.0439 | 0.6839 | 25.3151 | 0.0645 | 2.7606  |
| Stroke | genus.Lactococcus.id.1851                  | Simple mode               | 18 | -0.4105 | 0.4242 | 0.3467 | -0.0182 | 0.0439 | 0.6839 | 25.3151 | 0.0645 | 2.7606  |

|        |                                        |                           |    |         |        |        |         |        |        |         |        |         |
|--------|----------------------------------------|---------------------------|----|---------|--------|--------|---------|--------|--------|---------|--------|---------|
| Stroke | genus. Lactococcus. id. 1851           | Weighted mode             | 18 | -0.3527 | 0.3870 | 0.3748 | -0.0182 | 0.0439 | 0.6839 | 25.3151 | 0.0645 | 2.7606  |
| Stroke | genus. Marvinbryantia. id. 2005        | MR Egger                  | 19 | 0.1034  | 0.4369 | 0.8157 | -0.0096 | 0.0231 | 0.6820 | 24.0018 | 0.1194 | 8.0183  |
| Stroke | genus. Marvinbryantia. id. 2005        | Weighted median           | 19 | -0.0082 | 0.1098 | 0.9408 | -0.0096 | 0.0231 | 0.6820 | 24.0018 | 0.1194 | 8.0183  |
| Stroke | genus. Marvinbryantia. id. 2005        | Inverse variance weighted | 19 | -0.0748 | 0.0886 | 0.3990 | -0.0096 | 0.0231 | 0.6820 | 24.0018 | 0.1194 | 8.0183  |
| Stroke | genus. Marvinbryantia. id. 2005        | Simple mode               | 19 | 0.0213  | 0.1994 | 0.9162 | -0.0096 | 0.0231 | 0.6820 | 24.0018 | 0.1194 | 8.0183  |
| Stroke | genus. Marvinbryantia. id. 2005        | Weighted mode             | 19 | 0.0759  | 0.1674 | 0.6557 | -0.0096 | 0.0231 | 0.6820 | 24.0018 | 0.1194 | 8.0183  |
| Stroke | genus. Methanobrevibacter. id. 123     | MR Egger                  | 18 | 1.1391  | 0.7044 | 0.1254 | -0.0587 | 0.0371 | 0.1333 | 9.4446  | 0.9253 | 5.2927  |
| Stroke | genus. Methanobrevibacter. id. 123     | Weighted median           | 18 | 0.0157  | 0.1857 | 0.9328 | -0.0587 | 0.0371 | 0.1333 | 9.4446  | 0.9253 | 5.2927  |
| Stroke | genus. Methanobrevibacter. id. 123     | Inverse variance weighted | 18 | 0.0473  | 0.1406 | 0.7365 | -0.0587 | 0.0371 | 0.1333 | 9.4446  | 0.9253 | 5.2927  |
| Stroke | genus. Methanobrevibacter. id. 123     | Simple mode               | 18 | 0.0946  | 0.3182 | 0.7699 | -0.0587 | 0.0371 | 0.1333 | 9.4446  | 0.9253 | 5.2927  |
| Stroke | genus. Methanobrevibacter. id. 123     | Weighted mode             | 18 | 0.1010  | 0.2847 | 0.7272 | -0.0587 | 0.0371 | 0.1333 | 9.4446  | 0.9253 | 5.2927  |
| Stroke | genus. Odoribacter. id. 952            | MR Egger                  | 19 | 0.1119  | 0.3363 | 0.7434 | -0.0019 | 0.0178 | 0.9177 | 17.3297 | 0.4323 | 10.8202 |
| Stroke | genus. Odoribacter. id. 952            | Weighted median           | 19 | 0.0301  | 0.0956 | 0.7525 | -0.0019 | 0.0178 | 0.9177 | 17.3297 | 0.4323 | 10.8202 |
| Stroke | genus. Odoribacter. id. 952            | Inverse variance weighted | 19 | 0.0774  | 0.0692 | 0.2635 | -0.0019 | 0.0178 | 0.9177 | 17.3297 | 0.4323 | 10.8202 |
| Stroke | genus. Odoribacter. id. 952            | Simple mode               | 19 | 0.1341  | 0.1750 | 0.4534 | -0.0019 | 0.0178 | 0.9177 | 17.3297 | 0.4323 | 10.8202 |
| Stroke | genus. Odoribacter. id. 952            | Weighted mode             | 19 | 0.0870  | 0.1598 | 0.5931 | -0.0019 | 0.0178 | 0.9177 | 17.3297 | 0.4323 | 10.8202 |
| Stroke | genus. Olsenella. id. 822              | MR Egger                  | 18 | 0.5210  | 0.7889 | 0.5184 | -0.0248 | 0.0414 | 0.5576 | 21.2451 | 0.1693 | 2.8645  |
| Stroke | genus. Olsenella. id. 822              | Weighted median           | 18 | 0.1661  | 0.1936 | 0.3909 | -0.0248 | 0.0414 | 0.5576 | 21.2451 | 0.1693 | 2.8645  |
| Stroke | genus. Olsenella. id. 822              | Inverse variance weighted | 18 | 0.0582  | 0.1558 | 0.7089 | -0.0248 | 0.0414 | 0.5576 | 21.2451 | 0.1693 | 2.8645  |
| Stroke | genus. Olsenella. id. 822              | Simple mode               | 18 | 0.0784  | 0.3187 | 0.8086 | -0.0248 | 0.0414 | 0.5576 | 21.2451 | 0.1693 | 2.8645  |
| Stroke | genus. Olsenella. id. 822              | Weighted mode             | 18 | 0.0879  | 0.3321 | 0.7944 | -0.0248 | 0.0414 | 0.5576 | 21.2451 | 0.1693 | 2.8645  |
| Stroke | genus. Oscillibacter. id. 2063         | MR Egger                  | 19 | -0.6363 | 0.6090 | 0.3108 | 0.0308  | 0.0323 | 0.3530 | 36.4678 | 0.0061 | 4.3468  |
| Stroke | genus. Oscillibacter. id. 2063         | Weighted median           | 19 | 0.0749  | 0.1376 | 0.5865 | 0.0308  | 0.0323 | 0.3530 | 36.4678 | 0.0061 | 4.3468  |
| Stroke | genus. Oscillibacter. id. 2063         | Inverse variance weighted | 19 | -0.0674 | 0.1261 | 0.5931 | 0.0308  | 0.0323 | 0.3530 | 36.4678 | 0.0061 | 4.3468  |
| Stroke | genus. Oscillibacter. id. 2063         | Simple mode               | 19 | 0.2063  | 0.3120 | 0.5168 | 0.0308  | 0.0323 | 0.3530 | 36.4678 | 0.0061 | 4.3468  |
| Stroke | genus. Oscillibacter. id. 2063         | Weighted mode             | 19 | 0.2207  | 0.3125 | 0.4891 | 0.0308  | 0.0323 | 0.3530 | 36.4678 | 0.0061 | 4.3468  |
| Stroke | genus. Oscillospira. id. 2064          | MR Egger                  | 19 | -0.0450 | 0.4704 | 0.9250 | 0.0005  | 0.0249 | 0.9844 | 23.3205 | 0.1391 | 7.4953  |
| Stroke | genus. Oscillospira. id. 2064          | Weighted median           | 19 | 0.0067  | 0.1229 | 0.9566 | 0.0005  | 0.0249 | 0.9844 | 23.3205 | 0.1391 | 7.4953  |
| Stroke | genus. Oscillospira. id. 2064          | Inverse variance weighted | 19 | -0.0358 | 0.0946 | 0.7050 | 0.0005  | 0.0249 | 0.9844 | 23.3205 | 0.1391 | 7.4953  |
| Stroke | genus. Oscillospira. id. 2064          | Simple mode               | 19 | 0.0348  | 0.2294 | 0.8812 | 0.0005  | 0.0249 | 0.9844 | 23.3205 | 0.1391 | 7.4953  |
| Stroke | genus. Oscillospira. id. 2064          | Weighted mode             | 19 | 0.0246  | 0.2282 | 0.9154 | 0.0005  | 0.0249 | 0.9844 | 23.3205 | 0.1391 | 7.4953  |
| Stroke | genus. Oxalobacter. id. 2978           | MR Egger                  | 18 | 0.1047  | 0.6166 | 0.8673 | -0.0067 | 0.0324 | 0.8388 | 13.2791 | 0.6523 | 5.8373  |
| Stroke | genus. Oxalobacter. id. 2978           | Weighted median           | 18 | 0.0359  | 0.1626 | 0.8252 | -0.0067 | 0.0324 | 0.8388 | 13.2791 | 0.6523 | 5.8373  |
| Stroke | genus. Oxalobacter. id. 2978           | Inverse variance weighted | 18 | -0.0202 | 0.1238 | 0.8702 | -0.0067 | 0.0324 | 0.8388 | 13.2791 | 0.6523 | 5.8373  |
| Stroke | genus. Oxalobacter. id. 2978           | Simple mode               | 18 | 0.0333  | 0.2698 | 0.9032 | -0.0067 | 0.0324 | 0.8388 | 13.2791 | 0.6523 | 5.8373  |
| Stroke | genus. Oxalobacter. id. 2978           | Weighted mode             | 18 | 0.0865  | 0.2527 | 0.7362 | -0.0067 | 0.0324 | 0.8388 | 13.2791 | 0.6523 | 5.8373  |
| Stroke | genus. Parabacteroides. id. 954        | MR Egger                  | 19 | -0.0542 | 0.3075 | 0.8623 | 0.0056  | 0.0163 | 0.7335 | 17.0438 | 0.4514 | 13.2120 |
| Stroke | genus. Parabacteroides. id. 954        | Weighted median           | 19 | 0.1457  | 0.0909 | 0.1087 | 0.0056  | 0.0163 | 0.7335 | 17.0438 | 0.4514 | 13.2120 |
| Stroke | genus. Parabacteroides. id. 954        | Inverse variance weighted | 19 | 0.0499  | 0.0640 | 0.4352 | 0.0056  | 0.0163 | 0.7335 | 17.0438 | 0.4514 | 13.2120 |
| Stroke | genus. Parabacteroides. id. 954        | Simple mode               | 19 | 0.1675  | 0.1676 | 0.3311 | 0.0056  | 0.0163 | 0.7335 | 17.0438 | 0.4514 | 13.2120 |
| Stroke | genus. Parabacteroides. id. 954        | Weighted mode             | 19 | 0.1675  | 0.1552 | 0.2947 | 0.0056  | 0.0163 | 0.7335 | 17.0438 | 0.4514 | 13.2120 |
| Stroke | genus. Paraprevotella. id. 962         | MR Egger                  | 18 | -0.7134 | 0.5036 | 0.1758 | 0.0394  | 0.0266 | 0.1578 | 16.0184 | 0.5225 | 6.3994  |
| Stroke | genus. Paraprevotella. id. 962         | Weighted median           | 18 | -0.0658 | 0.1397 | 0.6375 | 0.0394  | 0.0266 | 0.1578 | 16.0184 | 0.5225 | 6.3994  |
| Stroke | genus. Paraprevotella. id. 962         | Inverse variance weighted | 18 | 0.0177  | 0.1013 | 0.8613 | 0.0394  | 0.0266 | 0.1578 | 16.0184 | 0.5225 | 6.3994  |
| Stroke | genus. Paraprevotella. id. 962         | Simple mode               | 18 | -0.0425 | 0.2753 | 0.8791 | 0.0394  | 0.0266 | 0.1578 | 16.0184 | 0.5225 | 6.3994  |
| Stroke | genus. Paraprevotella. id. 962         | Weighted mode             | 18 | -0.0538 | 0.2626 | 0.8401 | 0.0394  | 0.0266 | 0.1578 | 16.0184 | 0.5225 | 6.3994  |
| Stroke | genus. Parasutterella. id. 2892        | MR Egger                  | 19 | 0.1933  | 0.3769 | 0.6147 | -0.0130 | 0.0200 | 0.5237 | 15.2549 | 0.5771 | 4.8521  |
| Stroke | genus. Parasutterella. id. 2892        | Weighted median           | 19 | -0.0331 | 0.1123 | 0.7679 | -0.0130 | 0.0200 | 0.5237 | 15.2549 | 0.5771 | 4.8521  |
| Stroke | genus. Parasutterella. id. 2892        | Inverse variance weighted | 19 | -0.0467 | 0.0785 | 0.5517 | -0.0130 | 0.0200 | 0.5237 | 15.2549 | 0.5771 | 4.8521  |
| Stroke | genus. Parasutterella. id. 2892        | Simple mode               | 19 | 0.0037  | 0.1819 | 0.9841 | -0.0130 | 0.0200 | 0.5237 | 15.2549 | 0.5771 | 4.8521  |
| Stroke | genus. Parasutterella. id. 2892        | Weighted mode             | 19 | -0.0338 | 0.1628 | 0.8379 | -0.0130 | 0.0200 | 0.5237 | 15.2549 | 0.5771 | 4.8521  |
| Stroke | genus. Peptococcus. id. 2037           | MR Egger                  | 18 | 0.0137  | 0.5723 | 0.9812 | 0.0031  | 0.0301 | 0.9182 | 16.8419 | 0.3959 | 4.5162  |
| Stroke | genus. Peptococcus. id. 2037           | Weighted median           | 18 | 0.1386  | 0.1551 | 0.3716 | 0.0031  | 0.0301 | 0.9182 | 16.8419 | 0.3959 | 4.5162  |
| Stroke | genus. Peptococcus. id. 2037           | Inverse variance weighted | 18 | 0.0722  | 0.1121 | 0.5192 | 0.0031  | 0.0301 | 0.9182 | 16.8419 | 0.3959 | 4.5162  |
| Stroke | genus. Peptococcus. id. 2037           | Simple mode               | 18 | 0.1749  | 0.2733 | 0.5307 | 0.0031  | 0.0301 | 0.9182 | 16.8419 | 0.3959 | 4.5162  |
| Stroke | genus. Peptococcus. id. 2037           | Weighted mode             | 18 | 0.0947  | 0.2741 | 0.7341 | 0.0031  | 0.0301 | 0.9182 | 16.8419 | 0.3959 | 4.5162  |
| Stroke | genus. Phascolarctobacterium. id. 2168 | MR Egger                  | 19 | -0.5610 | 0.3848 | 0.1631 | 0.0318  | 0.0204 | 0.1381 | 17.6287 | 0.4804 | 5.2454  |
| Stroke | genus. Phascolarctobacterium. id. 2168 | Weighted median           | 19 | 0.0651  | 0.1154 | 0.5725 | 0.0318  | 0.0204 | 0.1381 | 17.6287 | 0.4804 | 5.2454  |

|        |                                               |                           |    |         |        |        |         |        |        |         |        |         |
|--------|-----------------------------------------------|---------------------------|----|---------|--------|--------|---------|--------|--------|---------|--------|---------|
| Stroke | genus. Phascolarctobacterium. id. 2168        | Inverse variance weighted | 19 | 0.0247  | 0.0801 | 0.7573 | 0.0318  | 0.0204 | 0.1381 | 17.6287 | 0.4804 | 5.2454  |
| Stroke | genus. Phascolarctobacterium. id. 2168        | Simple mode               | 19 | 0.1490  | 0.2184 | 0.5037 | 0.0318  | 0.0204 | 0.1381 | 17.6287 | 0.4804 | 5.2454  |
| Stroke | genus. Phascolarctobacterium. id. 2168        | Weighted mode             | 19 | 0.1844  | 0.2068 | 0.3844 | 0.0318  | 0.0204 | 0.1381 | 17.6287 | 0.4804 | 5.2454  |
| Stroke | genus. Prevotella7. id. 11182                 | MR Egger                  | 18 | 0.6828  | 0.7083 | 0.3494 | -0.0335 | 0.0373 | 0.3828 | 14.2126 | 0.5829 | 3.1238  |
| Stroke | genus. Prevotella7. id. 11182                 | Weighted median           | 18 | 0.0504  | 0.1990 | 0.8000 | -0.0335 | 0.0373 | 0.3828 | 14.2126 | 0.5829 | 3.1238  |
| Stroke | genus. Prevotella7. id. 11182                 | Inverse variance weighted | 18 | 0.0601  | 0.1423 | 0.6726 | -0.0335 | 0.0373 | 0.3828 | 14.2126 | 0.5829 | 3.1238  |
| Stroke | genus. Prevotella7. id. 11182                 | Simple mode               | 18 | -0.0173 | 0.3403 | 0.9600 | -0.0335 | 0.0373 | 0.3828 | 14.2126 | 0.5829 | 3.1238  |
| Stroke | genus. Prevotella7. id. 11182                 | Weighted mode             | 18 | 0.0072  | 0.2969 | 0.9811 | -0.0335 | 0.0373 | 0.3828 | 14.2126 | 0.5829 | 3.1238  |
| Stroke | genus. Prevotella9. id. 11183                 | MR Egger                  | 19 | -0.1816 | 0.4024 | 0.6575 | 0.0115  | 0.0214 | 0.5962 | 13.1662 | 0.7250 | 8.7311  |
| Stroke | genus. Prevotella9. id. 11183                 | Weighted median           | 19 | 0.1217  | 0.1119 | 0.2766 | 0.0115  | 0.0214 | 0.5962 | 13.1662 | 0.7250 | 8.7311  |
| Stroke | genus. Prevotella9. id. 11183                 | Inverse variance weighted | 19 | 0.0309  | 0.0839 | 0.7125 | 0.0115  | 0.0214 | 0.5962 | 13.1662 | 0.7250 | 8.7311  |
| Stroke | genus. Prevotella9. id. 11183                 | Simple mode               | 19 | 0.1676  | 0.2195 | 0.4549 | 0.0115  | 0.0214 | 0.5962 | 13.1662 | 0.7250 | 8.7311  |
| Stroke | genus. Prevotella9. id. 11183                 | Weighted mode             | 19 | 0.1816  | 0.1651 | 0.2860 | 0.0115  | 0.0214 | 0.5962 | 13.1662 | 0.7250 | 8.7311  |
| Stroke | genus. RikenellaceaeRC9gutgroup. id. 11191    | MR Egger                  | 18 | -1.1160 | 0.7289 | 0.1453 | 0.0514  | 0.0384 | 0.1989 | 15.1922 | 0.5816 | 2.8450  |
| Stroke | genus. RikenellaceaeRC9gutgroup. id. 11191    | Weighted median           | 18 | -0.1803 | 0.2189 | 0.4100 | 0.0514  | 0.0384 | 0.1989 | 15.1922 | 0.5816 | 2.8450  |
| Stroke | genus. RikenellaceaeRC9gutgroup. id. 11191    | Inverse variance weighted | 18 | -0.1592 | 0.1467 | 0.2777 | 0.0514  | 0.0384 | 0.1989 | 15.1922 | 0.5816 | 2.8450  |
| Stroke | genus. RikenellaceaeRC9gutgroup. id. 11191    | Simple mode               | 18 | 0.2020  | 0.4130 | 0.6310 | 0.0514  | 0.0384 | 0.1989 | 15.1922 | 0.5816 | 2.8450  |
| Stroke | genus. RikenellaceaeRC9gutgroup. id. 11191    | Weighted mode             | 18 | 0.1411  | 0.4049 | 0.7318 | 0.0514  | 0.0384 | 0.1989 | 15.1922 | 0.5816 | 2.8450  |
| Stroke | genus. Romboutsia. id. 11347                  | MR Egger                  | 19 | 0.6370  | 0.3394 | 0.0778 | -0.0332 | 0.0180 | 0.0822 | 12.3278 | 0.8299 | 14.4542 |
| Stroke | genus. Romboutsia. id. 11347                  | Weighted median           | 19 | 0.1259  | 0.0973 | 0.1955 | -0.0332 | 0.0180 | 0.0822 | 12.3278 | 0.8299 | 14.4542 |
| Stroke | genus. Romboutsia. id. 11347                  | Inverse variance weighted | 19 | 0.0238  | 0.0706 | 0.7361 | -0.0332 | 0.0180 | 0.0822 | 12.3278 | 0.8299 | 14.4542 |
| Stroke | genus. Romboutsia. id. 11347                  | Simple mode               | 19 | 0.1653  | 0.1770 | 0.3626 | -0.0332 | 0.0180 | 0.0822 | 12.3278 | 0.8299 | 14.4542 |
| Stroke | genus. Romboutsia. id. 11347                  | Weighted mode             | 19 | 0.1536  | 0.1459 | 0.3064 | -0.0332 | 0.0180 | 0.0822 | 12.3278 | 0.8299 | 14.4542 |
| Stroke | genus. Roseburia. id. 2012                    | MR Egger                  | 19 | -0.1412 | 0.3247 | 0.6690 | 0.0061  | 0.0172 | 0.7274 | 19.6309 | 0.2935 | 11.9901 |
| Stroke | genus. Roseburia. id. 2012                    | Weighted median           | 19 | -0.0382 | 0.0905 | 0.6730 | 0.0061  | 0.0172 | 0.7274 | 19.6309 | 0.2935 | 11.9901 |
| Stroke | genus. Roseburia. id. 2012                    | Inverse variance weighted | 19 | -0.0287 | 0.0660 | 0.6637 | 0.0061  | 0.0172 | 0.7274 | 19.6309 | 0.2935 | 11.9901 |
| Stroke | genus. Roseburia. id. 2012                    | Simple mode               | 19 | -0.0966 | 0.1683 | 0.5733 | 0.0061  | 0.0172 | 0.7274 | 19.6309 | 0.2935 | 11.9901 |
| Stroke | genus. Roseburia. id. 2012                    | Weighted mode             | 19 | -0.0923 | 0.1302 | 0.4874 | 0.0061  | 0.0172 | 0.7274 | 19.6309 | 0.2935 | 11.9901 |
| Stroke | genus. Ruminiclostridium5. id. 11355          | MR Egger                  | 19 | 0.2314  | 0.3060 | 0.4599 | -0.0148 | 0.0162 | 0.3742 | 12.0698 | 0.7959 | 17.8872 |
| Stroke | genus. Ruminiclostridium5. id. 11355          | Weighted median           | 19 | 0.0548  | 0.0869 | 0.5286 | -0.0148 | 0.0162 | 0.3742 | 12.0698 | 0.7959 | 17.8872 |
| Stroke | genus. Ruminiclostridium5. id. 11355          | Inverse variance weighted | 19 | -0.0418 | 0.0637 | 0.5120 | -0.0148 | 0.0162 | 0.3742 | 12.0698 | 0.7959 | 17.8872 |
| Stroke | genus. Ruminiclostridium5. id. 11355          | Simple mode               | 19 | 0.0732  | 0.1598 | 0.6525 | -0.0148 | 0.0162 | 0.3742 | 12.0698 | 0.7959 | 17.8872 |
| Stroke | genus. Ruminiclostridium5. id. 11355          | Weighted mode             | 19 | 0.0759  | 0.1337 | 0.5771 | -0.0148 | 0.0162 | 0.3742 | 12.0698 | 0.7959 | 17.8872 |
| Stroke | genus. Ruminiclostridium6. id. 11356          | MR Egger                  | 19 | -0.3027 | 0.3484 | 0.3970 | 0.0131  | 0.0185 | 0.4877 | 7.5305  | 0.9756 | 17.3041 |
| Stroke | genus. Ruminiclostridium6. id. 11356          | Weighted median           | 19 | -0.1500 | 0.0957 | 0.1169 | 0.0131  | 0.0185 | 0.4877 | 7.5305  | 0.9756 | 17.3041 |
| Stroke | genus. Ruminiclostridium6. id. 11356          | Inverse variance weighted | 19 | -0.0609 | 0.0723 | 0.3995 | 0.0131  | 0.0185 | 0.4877 | 7.5305  | 0.9756 | 17.3041 |
| Stroke | genus. Ruminiclostridium6. id. 11356          | Simple mode               | 19 | -0.1751 | 0.1666 | 0.3072 | 0.0131  | 0.0185 | 0.4877 | 7.5305  | 0.9756 | 17.3041 |
| Stroke | genus. Ruminiclostridium6. id. 11356          | Weighted mode             | 19 | -0.1916 | 0.1514 | 0.2219 | 0.0131  | 0.0185 | 0.4877 | 7.5305  | 0.9756 | 17.3041 |
| Stroke | genus. Ruminiclostridium9. id. 11357          | MR Egger                  | 19 | -0.4426 | 0.3277 | 0.1946 | 0.0194  | 0.0174 | 0.2797 | 20.0770 | 0.3285 | 8.4789  |
| Stroke | genus. Ruminiclostridium9. id. 11357          | Weighted median           | 19 | -0.1342 | 0.0917 | 0.1430 | 0.0194  | 0.0174 | 0.2797 | 20.0770 | 0.3285 | 8.4789  |
| Stroke | genus. Ruminiclostridium9. id. 11357          | Inverse variance weighted | 19 | -0.0846 | 0.0686 | 0.2176 | 0.0194  | 0.0174 | 0.2797 | 20.0770 | 0.3285 | 8.4789  |
| Stroke | genus. Ruminiclostridium9. id. 11357          | Simple mode               | 19 | -0.1042 | 0.1489 | 0.4930 | 0.0194  | 0.0174 | 0.2797 | 20.0770 | 0.3285 | 8.4789  |
| Stroke | genus. Ruminiclostridium9. id. 11357          | Weighted mode             | 19 | -0.0964 | 0.1463 | 0.5184 | 0.0194  | 0.0174 | 0.2797 | 20.0770 | 0.3285 | 8.4789  |
| Stroke | genus. RuminococcaceaeNK4A214group. id. 11358 | MR Egger                  | 19 | 0.5260  | 0.3270 | 0.1261 | -0.0309 | 0.0173 | 0.0925 | 12.6237 | 0.8134 | 13.2225 |
| Stroke | genus. RuminococcaceaeNK4A214group. id. 11358 | Weighted median           | 19 | 0.0206  | 0.0936 | 0.8259 | -0.0309 | 0.0173 | 0.0925 | 12.6237 | 0.8134 | 13.2225 |
| Stroke | genus. RuminococcaceaeNK4A214group. id. 11358 | Inverse variance weighted | 19 | -0.0443 | 0.0679 | 0.5146 | -0.0309 | 0.0173 | 0.0925 | 12.6237 | 0.8134 | 13.2225 |
| Stroke | genus. RuminococcaceaeNK4A214group. id. 11358 | Simple mode               | 19 | 0.0736  | 0.1669 | 0.6643 | -0.0309 | 0.0173 | 0.0925 | 12.6237 | 0.8134 | 13.2225 |
| Stroke | genus. RuminococcaceaeNK4A214group. id. 11358 | Weighted mode             | 19 | 0.0145  | 0.1576 | 0.9277 | -0.0309 | 0.0173 | 0.0925 | 12.6237 | 0.8134 | 13.2225 |
| Stroke | genus. RuminococcaceaeUCG002. id. 11360       | MR Egger                  | 19 | 0.3869  | 0.3101 | 0.2291 | -0.0223 | 0.0165 | 0.1933 | 19.0037 | 0.3916 | 11.9962 |
| Stroke | genus. RuminococcaceaeUCG002. id. 11360       | Weighted median           | 19 | 0.0245  | 0.0926 | 0.7915 | -0.0223 | 0.0165 | 0.1933 | 19.0037 | 0.3916 | 11.9962 |
| Stroke | genus. RuminococcaceaeUCG002. id. 11360       | Inverse variance weighted | 19 | -0.0240 | 0.0661 | 0.7163 | -0.0223 | 0.0165 | 0.1933 | 19.0037 | 0.3916 | 11.9962 |
| Stroke | genus. RuminococcaceaeUCG002. id. 11360       | Simple mode               | 19 | 0.0952  | 0.1786 | 0.6006 | -0.0223 | 0.0165 | 0.1933 | 19.0037 | 0.3916 | 11.9962 |
| Stroke | genus. RuminococcaceaeUCG002. id. 11360       | Weighted mode             | 19 | 0.0828  | 0.1520 | 0.5924 | -0.0223 | 0.0165 | 0.1933 | 19.0037 | 0.3916 | 11.9962 |
| Stroke | genus. RuminococcaceaeUCG003. id. 11361       | MR Egger                  | 19 | -0.2683 | 0.3848 | 0.4951 | 0.0098  | 0.0204 | 0.6387 | 22.2548 | 0.1751 | 8.8793  |
| Stroke | genus. RuminococcaceaeUCG003. id. 11361       | Weighted median           | 19 | -0.1051 | 0.0992 | 0.2893 | 0.0098  | 0.0204 | 0.6387 | 22.2548 | 0.1751 | 8.8793  |
| Stroke | genus. RuminococcaceaeUCG003. id. 11361       | Inverse variance weighted | 19 | -0.0884 | 0.0785 | 0.2601 | 0.0098  | 0.0204 | 0.6387 | 22.2548 | 0.1751 | 8.8793  |
| Stroke | genus. RuminococcaceaeUCG003. id. 11361       | Simple mode               | 19 | -0.1460 | 0.1560 | 0.3618 | 0.0098  | 0.0204 | 0.6387 | 22.2548 | 0.1751 | 8.8793  |
| Stroke | genus. RuminococcaceaeUCG003. id. 11361       | Weighted mode             | 19 | -0.1203 | 0.1502 | 0.4337 | 0.0098  | 0.0204 | 0.6387 | 22.2548 | 0.1751 | 8.8793  |

|        |                                         |                           |    |         |        |        |         |        |        |         |        |         |
|--------|-----------------------------------------|---------------------------|----|---------|--------|--------|---------|--------|--------|---------|--------|---------|
| Stroke | genus. RuminococcaceaeUCG004. id. 11362 | MR Egger                  | 19 | -0.3513 | 0.4144 | 0.4084 | 0.0148  | 0.0219 | 0.5092 | 9.8698  | 0.9090 | 6.0522  |
| Stroke | genus. RuminococcaceaeUCG004. id. 11362 | Weighted median           | 19 | -0.0967 | 0.1137 | 0.3953 | 0.0148  | 0.0219 | 0.5092 | 9.8698  | 0.9090 | 6.0522  |
| Stroke | genus. RuminococcaceaeUCG004. id. 11362 | Inverse variance weighted | 19 | -0.0780 | 0.0861 | 0.3650 | 0.0148  | 0.0219 | 0.5092 | 9.8698  | 0.9090 | 6.0522  |
| Stroke | genus. RuminococcaceaeUCG004. id. 11362 | Simple mode               | 19 | -0.0779 | 0.2039 | 0.7068 | 0.0148  | 0.0219 | 0.5092 | 9.8698  | 0.9090 | 6.0522  |
| Stroke | genus. RuminococcaceaeUCG004. id. 11362 | Weighted mode             | 19 | -0.1385 | 0.2114 | 0.5208 | 0.0148  | 0.0219 | 0.5092 | 9.8698  | 0.9090 | 6.0522  |
| Stroke | genus. RuminococcaceaeUCG005. id. 11363 | MR Egger                  | 19 | 0.0671  | 0.3176 | 0.8351 | -0.0036 | 0.0168 | 0.8346 | 16.4775 | 0.4903 | 14.2163 |
| Stroke | genus. RuminococcaceaeUCG005. id. 11363 | Weighted median           | 19 | -0.0227 | 0.0928 | 0.8071 | -0.0036 | 0.0168 | 0.8346 | 16.4775 | 0.4903 | 14.2163 |
| Stroke | genus. RuminococcaceaeUCG005. id. 11363 | Inverse variance weighted | 19 | 0.0013  | 0.0662 | 0.9845 | -0.0036 | 0.0168 | 0.8346 | 16.4775 | 0.4903 | 14.2163 |
| Stroke | genus. RuminococcaceaeUCG005. id. 11363 | Simple mode               | 19 | -0.1981 | 0.1661 | 0.2486 | -0.0036 | 0.0168 | 0.8346 | 16.4775 | 0.4903 | 14.2163 |
| Stroke | genus. RuminococcaceaeUCG005. id. 11363 | Weighted mode             | 19 | -0.2052 | 0.1660 | 0.2322 | -0.0036 | 0.0168 | 0.8346 | 16.4775 | 0.4903 | 14.2163 |
| Stroke | genus. RuminococcaceaeUCG009. id. 11366 | MR Egger                  | 18 | -0.2409 | 0.5181 | 0.6483 | 0.0073  | 0.0273 | 0.7919 | 18.1746 | 0.3138 | 5.3011  |
| Stroke | genus. RuminococcaceaeUCG009. id. 11366 | Weighted median           | 18 | -0.0574 | 0.1393 | 0.6805 | 0.0073  | 0.0273 | 0.7919 | 18.1746 | 0.3138 | 5.3011  |
| Stroke | genus. RuminococcaceaeUCG009. id. 11366 | Inverse variance weighted | 18 | -0.1047 | 0.1013 | 0.3015 | 0.0073  | 0.0273 | 0.7919 | 18.1746 | 0.3138 | 5.3011  |
| Stroke | genus. RuminococcaceaeUCG009. id. 11366 | Simple mode               | 18 | 0.0004  | 0.2478 | 0.9987 | 0.0073  | 0.0273 | 0.7919 | 18.1746 | 0.3138 | 5.3011  |
| Stroke | genus. RuminococcaceaeUCG009. id. 11366 | Weighted mode             | 18 | -0.0186 | 0.2380 | 0.9385 | 0.0073  | 0.0273 | 0.7919 | 18.1746 | 0.3138 | 5.3011  |
| Stroke | genus. RuminococcaceaeUCG010. id. 11367 | MR Egger                  | 19 | -0.4131 | 0.3563 | 0.2624 | 0.0201  | 0.0189 | 0.3021 | 12.3581 | 0.8282 | 14.4449 |
| Stroke | genus. RuminococcaceaeUCG010. id. 11367 | Weighted median           | 19 | -0.1122 | 0.1016 | 0.2696 | 0.0201  | 0.0189 | 0.3021 | 12.3581 | 0.8282 | 14.4449 |
| Stroke | genus. RuminococcaceaeUCG010. id. 11367 | Inverse variance weighted | 19 | -0.0421 | 0.0739 | 0.5688 | 0.0201  | 0.0189 | 0.3021 | 12.3581 | 0.8282 | 14.4449 |
| Stroke | genus. RuminococcaceaeUCG010. id. 11367 | Simple mode               | 19 | -0.1940 | 0.1780 | 0.2900 | 0.0201  | 0.0189 | 0.3021 | 12.3581 | 0.8282 | 14.4449 |
| Stroke | genus. RuminococcaceaeUCG010. id. 11367 | Weighted mode             | 19 | -0.1870 | 0.1519 | 0.2342 | 0.0201  | 0.0189 | 0.3021 | 12.3581 | 0.8282 | 14.4449 |
| Stroke | genus. RuminococcaceaeUCG011. id. 11368 | MR Egger                  | 18 | -0.2942 | 0.9731 | 0.7663 | 0.0190  | 0.0512 | 0.7147 | 31.9548 | 0.0101 | 2.1217  |
| Stroke | genus. RuminococcaceaeUCG011. id. 11368 | Weighted median           | 18 | 0.0935  | 0.2038 | 0.6466 | 0.0190  | 0.0512 | 0.7147 | 31.9548 | 0.0101 | 2.1217  |
| Stroke | genus. RuminococcaceaeUCG011. id. 11368 | Inverse variance weighted | 18 | 0.0604  | 0.1907 | 0.7514 | 0.0190  | 0.0512 | 0.7147 | 31.9548 | 0.0101 | 2.1217  |
| Stroke | genus. RuminococcaceaeUCG011. id. 11368 | Simple mode               | 18 | 0.0715  | 0.3520 | 0.8414 | 0.0190  | 0.0512 | 0.7147 | 31.9548 | 0.0101 | 2.1217  |
| Stroke | genus. RuminococcaceaeUCG011. id. 11368 | Weighted mode             | 18 | 0.0505  | 0.3509 | 0.8873 | 0.0190  | 0.0512 | 0.7147 | 31.9548 | 0.0101 | 2.1217  |
| Stroke | genus. RuminococcaceaeUCG013. id. 11370 | MR Egger                  | 19 | 0.1525  | 0.3122 | 0.6315 | -0.0189 | 0.0165 | 0.2690 | 16.4017 | 0.5645 | 8.9267  |
| Stroke | genus. RuminococcaceaeUCG013. id. 11370 | Weighted median           | 19 | -0.2604 | 0.0912 | 0.0043 | -0.0189 | 0.0165 | 0.2690 | 16.4017 | 0.5645 | 8.9267  |
| Stroke | genus. RuminococcaceaeUCG013. id. 11370 | Inverse variance weighted | 19 | -0.1964 | 0.0649 | 0.0025 | -0.0189 | 0.0165 | 0.2690 | 16.4017 | 0.5645 | 8.9267  |
| Stroke | genus. RuminococcaceaeUCG013. id. 11370 | Simple mode               | 19 | -0.2938 | 0.1628 | 0.0879 | -0.0189 | 0.0165 | 0.2690 | 16.4017 | 0.5645 | 8.9267  |
| Stroke | genus. RuminococcaceaeUCG013. id. 11370 | Weighted mode             | 19 | -0.2828 | 0.1438 | 0.0649 | -0.0189 | 0.0165 | 0.2690 | 16.4017 | 0.5645 | 8.9267  |
| Stroke | genus. RuminococcaceaeUCG014. id. 11371 | MR Egger                  | 19 | -0.1384 | 0.3371 | 0.6865 | 0.0123  | 0.0179 | 0.5013 | 10.7263 | 0.8704 | 15.2569 |
| Stroke | genus. RuminococcaceaeUCG014. id. 11371 | Weighted median           | 19 | 0.0339  | 0.0957 | 0.7232 | 0.0123  | 0.0179 | 0.5013 | 10.7263 | 0.8704 | 15.2569 |
| Stroke | genus. RuminococcaceaeUCG014. id. 11371 | Inverse variance weighted | 19 | 0.0882  | 0.0699 | 0.2073 | 0.0123  | 0.0179 | 0.5013 | 10.7263 | 0.8704 | 15.2569 |
| Stroke | genus. RuminococcaceaeUCG014. id. 11371 | Simple mode               | 19 | 0.0465  | 0.1489 | 0.7581 | 0.0123  | 0.0179 | 0.5013 | 10.7263 | 0.8704 | 15.2569 |
| Stroke | genus. RuminococcaceaeUCG014. id. 11371 | Weighted mode             | 19 | 0.0363  | 0.1464 | 0.8070 | 0.0123  | 0.0179 | 0.5013 | 10.7263 | 0.8704 | 15.2569 |
| Stroke | genus. Ruminococcus1. id. 11373         | MR Egger                  | 19 | 0.0515  | 0.3280 | 0.8772 | -0.0062 | 0.0174 | 0.7245 | 18.6230 | 0.3506 | 10.4161 |
| Stroke | genus. Ruminococcus1. id. 11373         | Weighted median           | 19 | -0.0738 | 0.0881 | 0.4020 | -0.0062 | 0.0174 | 0.7245 | 18.6230 | 0.3506 | 10.4161 |
| Stroke | genus. Ruminococcus1. id. 11373         | Inverse variance weighted | 19 | -0.0635 | 0.0666 | 0.3399 | -0.0062 | 0.0174 | 0.7245 | 18.6230 | 0.3506 | 10.4161 |
| Stroke | genus. Ruminococcus1. id. 11373         | Simple mode               | 19 | -0.0773 | 0.1377 | 0.5817 | -0.0062 | 0.0174 | 0.7245 | 18.6230 | 0.3506 | 10.4161 |
| Stroke | genus. Ruminococcus1. id. 11373         | Weighted mode             | 19 | -0.0962 | 0.1268 | 0.4579 | -0.0062 | 0.0174 | 0.7245 | 18.6230 | 0.3506 | 10.4161 |
| Stroke | genus. Ruminococcus2. id. 11374         | MR Egger                  | 19 | -0.4006 | 0.3263 | 0.2363 | 0.0172  | 0.0173 | 0.3340 | 16.9440 | 0.4582 | 10.9128 |
| Stroke | genus. Ruminococcus2. id. 11374         | Weighted median           | 19 | -0.1988 | 0.1000 | 0.0468 | 0.0172  | 0.0173 | 0.3340 | 16.9440 | 0.4582 | 10.9128 |
| Stroke | genus. Ruminococcus2. id. 11374         | Inverse variance weighted | 19 | -0.0832 | 0.0678 | 0.2200 | 0.0172  | 0.0173 | 0.3340 | 16.9440 | 0.4582 | 10.9128 |
| Stroke | genus. Ruminococcus2. id. 11374         | Simple mode               | 19 | -0.2696 | 0.2160 | 0.2278 | 0.0172  | 0.0173 | 0.3340 | 16.9440 | 0.4582 | 10.9128 |
| Stroke | genus. Ruminococcus2. id. 11374         | Weighted mode             | 19 | -0.2765 | 0.1913 | 0.1656 | 0.0172  | 0.0173 | 0.3340 | 16.9440 | 0.4582 | 10.9128 |
| Stroke | genus. Sellimonas. id. 14369            | MR Egger                  | 18 | 0.2282  | 0.7410 | 0.7621 | -0.0121 | 0.0390 | 0.7600 | 11.3542 | 0.7871 | 3.8035  |
| Stroke | genus. Sellimonas. id. 14369            | Weighted median           | 18 | -0.0761 | 0.2042 | 0.7094 | -0.0121 | 0.0390 | 0.7600 | 11.3542 | 0.7871 | 3.8035  |
| Stroke | genus. Sellimonas. id. 14369            | Inverse variance weighted | 18 | 0.0026  | 0.1490 | 0.9860 | -0.0121 | 0.0390 | 0.7600 | 11.3542 | 0.7871 | 3.8035  |
| Stroke | genus. Sellimonas. id. 14369            | Simple mode               | 18 | -0.1081 | 0.3744 | 0.7763 | -0.0121 | 0.0390 | 0.7600 | 11.3542 | 0.7871 | 3.8035  |
| Stroke | genus. Sellimonas. id. 14369            | Weighted mode             | 18 | -0.0679 | 0.3276 | 0.8383 | -0.0121 | 0.0390 | 0.7600 | 11.3542 | 0.7871 | 3.8035  |
| Stroke | genus. Senegalimassilia. id. 11160      | MR Egger                  | 18 | 0.0720  | 0.6122 | 0.9078 | -0.0048 | 0.0322 | 0.8839 | 23.5147 | 0.1007 | 4.6069  |
| Stroke | genus. Senegalimassilia. id. 11160      | Weighted median           | 18 | -0.0701 | 0.1437 | 0.6256 | -0.0048 | 0.0322 | 0.8839 | 23.5147 | 0.1007 | 4.6069  |
| Stroke | genus. Senegalimassilia. id. 11160      | Inverse variance weighted | 18 | -0.0169 | 0.1197 | 0.8876 | -0.0048 | 0.0322 | 0.8839 | 23.5147 | 0.1007 | 4.6069  |
| Stroke | genus. Senegalimassilia. id. 11160      | Simple mode               | 18 | -0.1932 | 0.2890 | 0.5129 | -0.0048 | 0.0322 | 0.8839 | 23.5147 | 0.1007 | 4.6069  |
| Stroke | genus. Senegalimassilia. id. 11160      | Weighted mode             | 18 | -0.0908 | 0.2167 | 0.6806 | -0.0048 | 0.0322 | 0.8839 | 23.5147 | 0.1007 | 4.6069  |
| Stroke | genus. Slackia. id. 825                 | MR Egger                  | 18 | -0.3937 | 0.6487 | 0.5524 | 0.0205  | 0.0341 | 0.5573 | 23.2918 | 0.1062 | 4.3362  |
| Stroke | genus. Slackia. id. 825                 | Weighted median           | 18 | 0.1585  | 0.1554 | 0.3080 | 0.0205  | 0.0341 | 0.5573 | 23.2918 | 0.1062 | 4.3362  |
| Stroke | genus. Slackia. id. 825                 | Inverse variance weighted | 18 | -0.0129 | 0.1282 | 0.9197 | 0.0205  | 0.0341 | 0.5573 | 23.2918 | 0.1062 | 4.3362  |

|        |                                     |                           |    |         |        |        |         |        |        |         |        |         |
|--------|-------------------------------------|---------------------------|----|---------|--------|--------|---------|--------|--------|---------|--------|---------|
| Stroke | genus. Slackia. id. 825             | Simple mode               | 18 | 0.2950  | 0.2893 | 0.3221 | 0.0205  | 0.0341 | 0.5573 | 23.2918 | 0.1062 | 4.3362  |
| Stroke | genus. Slackia. id. 825             | Weighted mode             | 18 | 0.2806  | 0.2574 | 0.2910 | 0.0205  | 0.0341 | 0.5573 | 23.2918 | 0.1062 | 4.3362  |
| Stroke | genus. Streptococcus. id. 1853      | MR Egger                  | 19 | 0.3354  | 0.3433 | 0.3422 | -0.0233 | 0.0182 | 0.2185 | 22.0833 | 0.2283 | 9.0775  |
| Stroke | genus. Streptococcus. id. 1853      | Weighted median           | 19 | -0.0305 | 0.0961 | 0.7511 | -0.0233 | 0.0182 | 0.2185 | 22.0833 | 0.2283 | 9.0775  |
| Stroke | genus. Streptococcus. id. 1853      | Inverse variance weighted | 19 | -0.0936 | 0.0727 | 0.1978 | -0.0233 | 0.0182 | 0.2185 | 22.0833 | 0.2283 | 9.0775  |
| Stroke | genus. Streptococcus. id. 1853      | Simple mode               | 19 | -0.4101 | 0.2165 | 0.0744 | -0.0233 | 0.0182 | 0.2185 | 22.0833 | 0.2283 | 9.0775  |
| Stroke | genus. Streptococcus. id. 1853      | Weighted mode             | 19 | 0.1258  | 0.1729 | 0.4760 | -0.0233 | 0.0182 | 0.2185 | 22.0833 | 0.2283 | 9.0775  |
| Stroke | genus. Sutterella. id. 2896         | MR Egger                  | 19 | -0.3580 | 0.4138 | 0.3990 | 0.0225  | 0.0220 | 0.3199 | 24.9914 | 0.1252 | 8.3394  |
| Stroke | genus. Sutterella. id. 2896         | Weighted median           | 19 | 0.0684  | 0.1134 | 0.5466 | 0.0225  | 0.0220 | 0.3199 | 24.9914 | 0.1252 | 8.3394  |
| Stroke | genus. Sutterella. id. 2896         | Inverse variance weighted | 19 | 0.0567  | 0.0863 | 0.5106 | 0.0225  | 0.0220 | 0.3199 | 24.9914 | 0.1252 | 8.3394  |
| Stroke | genus. Sutterella. id. 2896         | Simple mode               | 19 | 0.0110  | 0.2425 | 0.9643 | 0.0225  | 0.0220 | 0.3199 | 24.9914 | 0.1252 | 8.3394  |
| Stroke | genus. Sutterella. id. 2896         | Weighted mode             | 19 | -0.0353 | 0.2475 | 0.8882 | 0.0225  | 0.0220 | 0.3199 | 24.9914 | 0.1252 | 8.3394  |
| Stroke | genus. Terrisporobacter. id. 11348  | MR Egger                  | 18 | 0.8974  | 0.6360 | 0.1774 | -0.0465 | 0.0335 | 0.1839 | 27.0815 | 0.0569 | 2.9716  |
| Stroke | genus. Terrisporobacter. id. 11348  | Weighted median           | 18 | -0.0386 | 0.1421 | 0.7861 | -0.0465 | 0.0335 | 0.1839 | 27.0815 | 0.0569 | 2.9716  |
| Stroke | genus. Terrisporobacter. id. 11348  | Inverse variance weighted | 18 | 0.0319  | 0.1307 | 0.8073 | -0.0465 | 0.0335 | 0.1839 | 27.0815 | 0.0569 | 2.9716  |
| Stroke | genus. Terrisporobacter. id. 11348  | Simple mode               | 18 | -0.0810 | 0.2483 | 0.7481 | -0.0465 | 0.0335 | 0.1839 | 27.0815 | 0.0569 | 2.9716  |
| Stroke | genus. Terrisporobacter. id. 11348  | Weighted mode             | 18 | -0.0519 | 0.2065 | 0.8045 | -0.0465 | 0.0335 | 0.1839 | 27.0815 | 0.0569 | 2.9716  |
| Stroke | genus. Turicibacter. id. 2162       | MR Egger                  | 18 | 0.3317  | 0.4511 | 0.4728 | -0.0105 | 0.0237 | 0.6632 | 16.4765 | 0.4202 | 6.2325  |
| Stroke | genus. Turicibacter. id. 2162       | Weighted median           | 18 | 0.1977  | 0.1220 | 0.1050 | -0.0105 | 0.0237 | 0.6632 | 16.4765 | 0.4202 | 6.2325  |
| Stroke | genus. Turicibacter. id. 2162       | Inverse variance weighted | 18 | 0.1356  | 0.0893 | 0.1288 | -0.0105 | 0.0237 | 0.6632 | 16.4765 | 0.4202 | 6.2325  |
| Stroke | genus. Turicibacter. id. 2162       | Simple mode               | 18 | 0.2527  | 0.1884 | 0.1975 | -0.0105 | 0.0237 | 0.6632 | 16.4765 | 0.4202 | 6.2325  |
| Stroke | genus. Turicibacter. id. 2162       | Weighted mode             | 18 | 0.2637  | 0.1635 | 0.1253 | -0.0105 | 0.0237 | 0.6632 | 16.4765 | 0.4202 | 6.2325  |
| Stroke | genus. Tyzzerella3. id. 11335       | MR Egger                  | 18 | 0.1767  | 0.7430 | 0.8150 | -0.0123 | 0.0391 | 0.7569 | 26.2889 | 0.0501 | 3.2683  |
| Stroke | genus. Tyzzerella3. id. 11335       | Weighted median           | 18 | 0.0524  | 0.1759 | 0.7657 | -0.0123 | 0.0391 | 0.7569 | 26.2889 | 0.0501 | 3.2683  |
| Stroke | genus. Tyzzerella3. id. 11335       | Inverse variance weighted | 18 | -0.0525 | 0.1449 | 0.7172 | -0.0123 | 0.0391 | 0.7569 | 26.2889 | 0.0501 | 3.2683  |
| Stroke | genus. Tyzzerella3. id. 11335       | Simple mode               | 18 | 0.2049  | 0.3215 | 0.5325 | -0.0123 | 0.0391 | 0.7569 | 26.2889 | 0.0501 | 3.2683  |
| Stroke | genus. Tyzzerella3. id. 11335       | Weighted mode             | 18 | 0.1819  | 0.3119 | 0.5675 | -0.0123 | 0.0391 | 0.7569 | 26.2889 | 0.0501 | 3.2683  |
| Stroke | genus. Veillonella. id. 2198        | MR Egger                  | 19 | 0.2592  | 0.4218 | 0.5469 | -0.0011 | 0.0224 | 0.9612 | 8.2529  | 0.9608 | 8.3188  |
| Stroke | genus. Veillonella. id. 2198        | Weighted median           | 19 | 0.2141  | 0.1146 | 0.0618 | -0.0011 | 0.0224 | 0.9612 | 8.2529  | 0.9608 | 8.3188  |
| Stroke | genus. Veillonella. id. 2198        | Inverse variance weighted | 19 | 0.2389  | 0.0878 | 0.0065 | -0.0011 | 0.0224 | 0.9612 | 8.2529  | 0.9608 | 8.3188  |
| Stroke | genus. Veillonella. id. 2198        | Simple mode               | 19 | 0.2719  | 0.1954 | 0.1810 | -0.0011 | 0.0224 | 0.9612 | 8.2529  | 0.9608 | 8.3188  |
| Stroke | genus. Veillonella. id. 2198        | Weighted mode             | 19 | 0.0420  | 0.1937 | 0.8306 | -0.0011 | 0.0224 | 0.9612 | 8.2529  | 0.9608 | 8.3188  |
| Stroke | genus. Victivallis. id. 2256        | MR Egger                  | 15 | -0.9560 | 0.8605 | 0.2867 | 0.0373  | 0.0455 | 0.4272 | 10.0251 | 0.6919 | 2.8842  |
| Stroke | genus. Victivallis. id. 2256        | Weighted median           | 15 | -0.2099 | 0.2189 | 0.3376 | 0.0373  | 0.0455 | 0.4272 | 10.0251 | 0.6919 | 2.8842  |
| Stroke | genus. Victivallis. id. 2256        | Inverse variance weighted | 15 | -0.2627 | 0.1579 | 0.0961 | 0.0373  | 0.0455 | 0.4272 | 10.0251 | 0.6919 | 2.8842  |
| Stroke | genus. Victivallis. id. 2256        | Simple mode               | 15 | -0.3194 | 0.3477 | 0.3739 | 0.0373  | 0.0455 | 0.4272 | 10.0251 | 0.6919 | 2.8842  |
| Stroke | genus. Victivallis. id. 2256        | Weighted mode             | 15 | -0.2082 | 0.3138 | 0.5179 | 0.0373  | 0.0455 | 0.4272 | 10.0251 | 0.6919 | 2.8842  |
| Stroke | genus. unknowngenus. id. 1000000073 | MR Egger                  | 19 | 0.2371  | 0.3914 | 0.5527 | -0.0118 | 0.0208 | 0.5758 | 8.3443  | 0.9586 | 16.4045 |
| Stroke | genus. unknowngenus. id. 1000000073 | Weighted median           | 19 | 0.0343  | 0.1114 | 0.7584 | -0.0118 | 0.0208 | 0.5758 | 8.3443  | 0.9586 | 16.4045 |
| Stroke | genus. unknowngenus. id. 1000000073 | Inverse variance weighted | 19 | 0.0187  | 0.0815 | 0.8183 | -0.0118 | 0.0208 | 0.5758 | 8.3443  | 0.9586 | 16.4045 |
| Stroke | genus. unknowngenus. id. 1000000073 | Simple mode               | 19 | 0.0595  | 0.1814 | 0.7469 | -0.0118 | 0.0208 | 0.5758 | 8.3443  | 0.9586 | 16.4045 |
| Stroke | genus. unknowngenus. id. 1000000073 | Weighted mode             | 19 | 0.0695  | 0.1746 | 0.6951 | -0.0118 | 0.0208 | 0.5758 | 8.3443  | 0.9586 | 16.4045 |
| Stroke | genus. unknowngenus. id. 1000001215 | MR Egger                  | 18 | -0.6645 | 0.5481 | 0.2429 | 0.0292  | 0.0289 | 0.3266 | 15.4817 | 0.5608 | 4.6775  |
| Stroke | genus. unknowngenus. id. 1000001215 | Weighted median           | 18 | -0.1529 | 0.1571 | 0.3305 | 0.0292  | 0.0289 | 0.3266 | 15.4817 | 0.5608 | 4.6775  |
| Stroke | genus. unknowngenus. id. 1000001215 | Inverse variance weighted | 18 | -0.1211 | 0.1098 | 0.2700 | 0.0292  | 0.0289 | 0.3266 | 15.4817 | 0.5608 | 4.6775  |
| Stroke | genus. unknowngenus. id. 1000001215 | Simple mode               | 18 | 0.3499  | 0.3154 | 0.2828 | 0.0292  | 0.0289 | 0.3266 | 15.4817 | 0.5608 | 4.6775  |
| Stroke | genus. unknowngenus. id. 1000001215 | Weighted mode             | 18 | -0.3652 | 0.2670 | 0.1892 | 0.0292  | 0.0289 | 0.3266 | 15.4817 | 0.5608 | 4.6775  |
| Stroke | genus. unknowngenus. id. 1000005472 | MR Egger                  | 19 | 0.0712  | 0.3984 | 0.8603 | -0.0050 | 0.0211 | 0.8146 | 16.6191 | 0.4804 | 8.5205  |
| Stroke | genus. unknowngenus. id. 1000005472 | Weighted median           | 19 | -0.0394 | 0.1182 | 0.7391 | -0.0050 | 0.0211 | 0.8146 | 16.6191 | 0.4804 | 8.5205  |
| Stroke | genus. unknowngenus. id. 1000005472 | Inverse variance weighted | 19 | -0.0216 | 0.0825 | 0.7931 | -0.0050 | 0.0211 | 0.8146 | 16.6191 | 0.4804 | 8.5205  |
| Stroke | genus. unknowngenus. id. 1000005472 | Simple mode               | 19 | 0.0373  | 0.2120 | 0.8624 | -0.0050 | 0.0211 | 0.8146 | 16.6191 | 0.4804 | 8.5205  |
| Stroke | genus. unknowngenus. id. 1000005472 | Weighted mode             | 19 | -0.0153 | 0.1925 | 0.9375 | -0.0050 | 0.0211 | 0.8146 | 16.6191 | 0.4804 | 8.5205  |
| Stroke | genus. unknowngenus. id. 1000005479 | MR Egger                  | 18 | 0.1712  | 0.4725 | 0.7219 | -0.0104 | 0.0249 | 0.6824 | 10.3247 | 0.8491 | 9.6563  |
| Stroke | genus. unknowngenus. id. 1000005479 | Weighted median           | 18 | 0.0045  | 0.1247 | 0.9711 | -0.0104 | 0.0249 | 0.6824 | 10.3247 | 0.8491 | 9.6563  |
| Stroke | genus. unknowngenus. id. 1000005479 | Inverse variance weighted | 18 | -0.0217 | 0.0951 | 0.8198 | -0.0104 | 0.0249 | 0.6824 | 10.3247 | 0.8491 | 9.6563  |
| Stroke | genus. unknowngenus. id. 1000005479 | Simple mode               | 18 | -0.0626 | 0.2068 | 0.7657 | -0.0104 | 0.0249 | 0.6824 | 10.3247 | 0.8491 | 9.6563  |
| Stroke | genus. unknowngenus. id. 1000005479 | Weighted mode             | 18 | -0.0284 | 0.2089 | 0.8935 | -0.0104 | 0.0249 | 0.6824 | 10.3247 | 0.8491 | 9.6563  |
| Stroke | genus. unknowngenus. id. 1000006162 | MR Egger                  | 18 | -1.1332 | 0.8362 | 0.1942 | 0.0593  | 0.0441 | 0.1969 | 36.5050 | 0.0039 | 2.5156  |

|        |                                     |                           |    |         |        |        |         |        |        |         |        |         |
|--------|-------------------------------------|---------------------------|----|---------|--------|--------|---------|--------|--------|---------|--------|---------|
| Stroke | genus. unknowngenus. id. 1000006162 | Weighted median           | 18 | -0.0596 | 0.1763 | 0.7351 | 0.0593  | 0.0441 | 0.1969 | 36.5050 | 0.0039 | 2.5156  |
| Stroke | genus. unknowngenus. id. 1000006162 | Inverse variance weighted | 18 | -0.0302 | 0.1717 | 0.8604 | 0.0593  | 0.0441 | 0.1969 | 36.5050 | 0.0039 | 2.5156  |
| Stroke | genus. unknowngenus. id. 1000006162 | Simple mode               | 18 | -0.0522 | 0.3091 | 0.8678 | 0.0593  | 0.0441 | 0.1969 | 36.5050 | 0.0039 | 2.5156  |
| Stroke | genus. unknowngenus. id. 1000006162 | Weighted mode             | 18 | -0.0785 | 0.2627 | 0.7687 | 0.0593  | 0.0441 | 0.1969 | 36.5050 | 0.0039 | 2.5156  |
| Stroke | genus. unknowngenus. id. 1868       | MR Egger                  | 19 | 0.5855  | 0.4964 | 0.2544 | -0.0247 | 0.0263 | 0.3608 | 27.8218 | 0.0648 | 4.5318  |
| Stroke | genus. unknowngenus. id. 1868       | Weighted median           | 19 | 0.1499  | 0.1213 | 0.2166 | -0.0247 | 0.0263 | 0.3608 | 27.8218 | 0.0648 | 4.5318  |
| Stroke | genus. unknowngenus. id. 1868       | Inverse variance weighted | 19 | 0.1294  | 0.1023 | 0.2057 | -0.0247 | 0.0263 | 0.3608 | 27.8218 | 0.0648 | 4.5318  |
| Stroke | genus. unknowngenus. id. 1868       | Simple mode               | 19 | 0.1023  | 0.1851 | 0.5872 | -0.0247 | 0.0263 | 0.3608 | 27.8218 | 0.0648 | 4.5318  |
| Stroke | genus. unknowngenus. id. 1868       | Weighted mode             | 19 | 0.1407  | 0.1720 | 0.4241 | -0.0247 | 0.0263 | 0.3608 | 27.8218 | 0.0648 | 4.5318  |
| Stroke | genus. unknowngenus. id. 2001       | MR Egger                  | 19 | -0.2215 | 0.5866 | 0.7105 | 0.0130  | 0.0311 | 0.6801 | 36.4048 | 0.0040 | 4.3430  |
| Stroke | genus. unknowngenus. id. 2001       | Weighted median           | 19 | -0.0247 | 0.1363 | 0.8562 | 0.0130  | 0.0311 | 0.6801 | 36.4048 | 0.0040 | 4.3430  |
| Stroke | genus. unknowngenus. id. 2001       | Inverse variance weighted | 19 | 0.0192  | 0.1194 | 0.8722 | 0.0130  | 0.0311 | 0.6801 | 36.4048 | 0.0040 | 4.3430  |
| Stroke | genus. unknowngenus. id. 2001       | Simple mode               | 19 | -0.4670 | 0.3183 | 0.1596 | 0.0130  | 0.0311 | 0.6801 | 36.4048 | 0.0040 | 4.3430  |
| Stroke | genus. unknowngenus. id. 2001       | Weighted mode             | 19 | 0.3256  | 0.2759 | 0.2534 | 0.0130  | 0.0311 | 0.6801 | 36.4048 | 0.0040 | 4.3430  |
| Stroke | genus. unknowngenus. id. 2041       | MR Egger                  | 18 | -0.0482 | 0.4703 | 0.9196 | -0.0066 | 0.0247 | 0.7923 | 13.1577 | 0.6612 | 7.9591  |
| Stroke | genus. unknowngenus. id. 2041       | Weighted median           | 18 | -0.1475 | 0.1261 | 0.2421 | -0.0066 | 0.0247 | 0.7923 | 13.1577 | 0.6612 | 7.9591  |
| Stroke | genus. unknowngenus. id. 2041       | Inverse variance weighted | 18 | -0.1716 | 0.0944 | 0.0692 | -0.0066 | 0.0247 | 0.7923 | 13.1577 | 0.6612 | 7.9591  |
| Stroke | genus. unknowngenus. id. 2041       | Simple mode               | 18 | -0.1139 | 0.2288 | 0.6251 | -0.0066 | 0.0247 | 0.7923 | 13.1577 | 0.6612 | 7.9591  |
| Stroke | genus. unknowngenus. id. 2041       | Weighted mode             | 18 | -0.1092 | 0.2038 | 0.5993 | -0.0066 | 0.0247 | 0.7923 | 13.1577 | 0.6612 | 7.9591  |
| Stroke | genus. unknowngenus. id. 2071       | MR Egger                  | 19 | 0.3937  | 0.3617 | 0.2916 | -0.0189 | 0.0191 | 0.3369 | 11.3465 | 0.8791 | 12.8135 |
| Stroke | genus. unknowngenus. id. 2071       | Weighted median           | 19 | 0.0393  | 0.1034 | 0.7039 | -0.0189 | 0.0191 | 0.3369 | 11.3465 | 0.8791 | 12.8135 |
| Stroke | genus. unknowngenus. id. 2071       | Inverse variance weighted | 19 | 0.0440  | 0.0749 | 0.5570 | -0.0189 | 0.0191 | 0.3369 | 11.3465 | 0.8791 | 12.8135 |
| Stroke | genus. unknowngenus. id. 2071       | Simple mode               | 19 | 0.1693  | 0.1941 | 0.3944 | -0.0189 | 0.0191 | 0.3369 | 11.3465 | 0.8791 | 12.8135 |
| Stroke | genus. unknowngenus. id. 2071       | Weighted mode             | 19 | 0.2061  | 0.1783 | 0.2629 | -0.0189 | 0.0191 | 0.3369 | 11.3465 | 0.8791 | 12.8135 |
| Stroke | genus. unknowngenus. id. 2755       | MR Egger                  | 18 | -0.1251 | 0.4545 | 0.7866 | 0.0050  | 0.0239 | 0.8374 | 10.0819 | 0.8623 | 11.9470 |
| Stroke | genus. unknowngenus. id. 2755       | Weighted median           | 18 | 0.0202  | 0.1193 | 0.8655 | 0.0050  | 0.0239 | 0.8374 | 10.0819 | 0.8623 | 11.9470 |
| Stroke | genus. unknowngenus. id. 2755       | Inverse variance weighted | 18 | -0.0323 | 0.0912 | 0.7236 | 0.0050  | 0.0239 | 0.8374 | 10.0819 | 0.8623 | 11.9470 |
| Stroke | genus. unknowngenus. id. 2755       | Simple mode               | 18 | 0.0757  | 0.2438 | 0.7600 | 0.0050  | 0.0239 | 0.8374 | 10.0819 | 0.8623 | 11.9470 |
| Stroke | genus. unknowngenus. id. 2755       | Weighted mode             | 18 | 0.1033  | 0.2360 | 0.6671 | 0.0050  | 0.0239 | 0.8374 | 10.0819 | 0.8623 | 11.9470 |
| Stroke | genus. unknowngenus. id. 826        | MR Egger                  | 19 | 0.2302  | 0.3785 | 0.5511 | -0.0138 | 0.0200 | 0.5005 | 19.8959 | 0.2796 | 9.9228  |
| Stroke | genus. unknowngenus. id. 826        | Weighted median           | 19 | -0.0435 | 0.1045 | 0.6770 | -0.0138 | 0.0200 | 0.5005 | 19.8959 | 0.2796 | 9.9228  |
| Stroke | genus. unknowngenus. id. 826        | Inverse variance weighted | 19 | -0.0247 | 0.0774 | 0.7498 | -0.0138 | 0.0200 | 0.5005 | 19.8959 | 0.2796 | 9.9228  |
| Stroke | genus. unknowngenus. id. 826        | Simple mode               | 19 | -0.0380 | 0.1794 | 0.8346 | -0.0138 | 0.0200 | 0.5005 | 19.8959 | 0.2796 | 9.9228  |
| Stroke | genus. unknowngenus. id. 826        | Weighted mode             | 19 | -0.0380 | 0.1546 | 0.8086 | -0.0138 | 0.0200 | 0.5005 | 19.8959 | 0.2796 | 9.9228  |
| Stroke | genus. unknowngenus. id. 959        | MR Egger                  | 18 | -0.9972 | 0.6207 | 0.1277 | 0.0515  | 0.0327 | 0.1343 | 9.4800  | 0.9240 | 6.2129  |
| Stroke | genus. unknowngenus. id. 959        | Weighted median           | 18 | -0.0777 | 0.1661 | 0.6400 | 0.0515  | 0.0327 | 0.1343 | 9.4800  | 0.9240 | 6.2129  |
| Stroke | genus. unknowngenus. id. 959        | Inverse variance weighted | 18 | -0.0382 | 0.1245 | 0.7592 | 0.0515  | 0.0327 | 0.1343 | 9.4800  | 0.9240 | 6.2129  |
| Stroke | genus. unknowngenus. id. 959        | Simple mode               | 18 | -0.1019 | 0.2825 | 0.7229 | 0.0515  | 0.0327 | 0.1343 | 9.4800  | 0.9240 | 6.2129  |
| Stroke | genus. unknowngenus. id. 959        | Weighted mode             | 18 | -0.0817 | 0.2459 | 0.7439 | 0.0515  | 0.0327 | 0.1343 | 9.4800  | 0.9240 | 6.2129  |
| Stroke | order. Actinomycetales. id. 420     | MR Egger                  | 18 | -0.0008 | 0.4795 | 0.9987 | -0.0062 | 0.0252 | 0.8079 | 16.1758 | 0.4408 | 6.0303  |
| Stroke | order. Actinomycetales. id. 420     | Weighted median           | 18 | -0.0510 | 0.1357 | 0.7072 | -0.0062 | 0.0252 | 0.8079 | 16.1758 | 0.4408 | 6.0303  |
| Stroke | order. Actinomycetales. id. 420     | Inverse variance weighted | 18 | -0.1169 | 0.0959 | 0.2228 | -0.0062 | 0.0252 | 0.8079 | 16.1758 | 0.4408 | 6.0303  |
| Stroke | order. Actinomycetales. id. 420     | Simple mode               | 18 | -0.0406 | 0.2138 | 0.8515 | -0.0062 | 0.0252 | 0.8079 | 16.1758 | 0.4408 | 6.0303  |
| Stroke | order. Actinomycetales. id. 420     | Weighted mode             | 18 | -0.0351 | 0.1904 | 0.8561 | -0.0062 | 0.0252 | 0.8079 | 16.1758 | 0.4408 | 6.0303  |
| Stroke | order. Bacillales. id. 1674         | MR Egger                  | 17 | 0.8848  | 0.8149 | 0.2947 | -0.0442 | 0.0421 | 0.3102 | 12.9338 | 0.6776 | 3.8466  |
| Stroke | order. Bacillales. id. 1674         | Weighted median           | 17 | -0.0928 | 0.2138 | 0.6643 | -0.0442 | 0.0421 | 0.3102 | 12.9338 | 0.6776 | 3.8466  |
| Stroke | order. Bacillales. id. 1674         | Inverse variance weighted | 17 | 0.0444  | 0.1542 | 0.7736 | -0.0442 | 0.0421 | 0.3102 | 12.9338 | 0.6776 | 3.8466  |
| Stroke | order. Bacillales. id. 1674         | Simple mode               | 17 | -0.1855 | 0.3878 | 0.6388 | -0.0442 | 0.0421 | 0.3102 | 12.9338 | 0.6776 | 3.8466  |
| Stroke | order. Bacillales. id. 1674         | Weighted mode             | 17 | -0.1323 | 0.3877 | 0.7374 | -0.0442 | 0.0421 | 0.3102 | 12.9338 | 0.6776 | 3.8466  |
| Stroke | order. Bacteroidales. id. 913       | MR Egger                  | 19 | 0.2165  | 0.3153 | 0.5016 | -0.0071 | 0.0167 | 0.6776 | 19.0100 | 0.3280 | 9.1115  |
| Stroke | order. Bacteroidales. id. 913       | Weighted median           | 19 | 0.1271  | 0.0891 | 0.1536 | -0.0071 | 0.0167 | 0.6776 | 19.0100 | 0.3280 | 9.1115  |
| Stroke | order. Bacteroidales. id. 913       | Inverse variance weighted | 19 | 0.0861  | 0.0642 | 0.1801 | -0.0071 | 0.0167 | 0.6776 | 19.0100 | 0.3280 | 9.1115  |
| Stroke | order. Bacteroidales. id. 913       | Simple mode               | 19 | -0.0054 | 0.1668 | 0.9744 | -0.0071 | 0.0167 | 0.6776 | 19.0100 | 0.3280 | 9.1115  |
| Stroke | order. Bacteroidales. id. 913       | Weighted mode             | 19 | -0.0165 | 0.1418 | 0.9088 | -0.0071 | 0.0167 | 0.6776 | 19.0100 | 0.3280 | 9.1115  |
| Stroke | order. Bifidobacteriales. id. 432   | MR Egger                  | 19 | 0.4560  | 0.4279 | 0.3014 | -0.0255 | 0.0227 | 0.2779 | 30.8557 | 0.0299 | 5.5498  |
| Stroke | order. Bifidobacteriales. id. 432   | Weighted median           | 19 | 0.0710  | 0.0960 | 0.4598 | -0.0255 | 0.0227 | 0.2779 | 30.8557 | 0.0299 | 5.5498  |
| Stroke | order. Bifidobacteriales. id. 432   | Inverse variance weighted | 19 | -0.0129 | 0.0902 | 0.8861 | -0.0255 | 0.0227 | 0.2779 | 30.8557 | 0.0299 | 5.5498  |
| Stroke | order. Bifidobacteriales. id. 432   | Simple mode               | 19 | 0.0397  | 0.1574 | 0.8036 | -0.0255 | 0.0227 | 0.2779 | 30.8557 | 0.0299 | 5.5498  |

|        |                                      |                           |    |         |        |        |         |        |        |         |        |         |
|--------|--------------------------------------|---------------------------|----|---------|--------|--------|---------|--------|--------|---------|--------|---------|
| Stroke | order. Bifidobacteriales. id. 432    | Weighted mode             | 19 | 0.0565  | 0.1335 | 0.6771 | -0.0255 | 0.0227 | 0.2779 | 30.8557 | 0.0299 | 5.5498  |
| Stroke | order. Burkholderiales. id. 2874     | MR Egger                  | 19 | -0.4245 | 0.3087 | 0.1870 | 0.0251  | 0.0164 | 0.1442 | 17.2572 | 0.5055 | 11.0117 |
| Stroke | order. Burkholderiales. id. 2874     | Weighted median           | 19 | 0.0749  | 0.0935 | 0.4233 | 0.0251  | 0.0164 | 0.1442 | 17.2572 | 0.5055 | 11.0117 |
| Stroke | order. Burkholderiales. id. 2874     | Inverse variance weighted | 19 | 0.0377  | 0.0643 | 0.5581 | 0.0251  | 0.0164 | 0.1442 | 17.2572 | 0.5055 | 11.0117 |
| Stroke | order. Burkholderiales. id. 2874     | Simple mode               | 19 | 0.1887  | 0.1715 | 0.2856 | 0.0251  | 0.0164 | 0.1442 | 17.2572 | 0.5055 | 11.0117 |
| Stroke | order. Burkholderiales. id. 2874     | Weighted mode             | 19 | 0.1208  | 0.1605 | 0.4613 | 0.0251  | 0.0164 | 0.1442 | 17.2572 | 0.5055 | 11.0117 |
| Stroke | order. Clostridiales. id. 1863       | MR Egger                  | 19 | -0.0547 | 0.2982 | 0.8566 | -0.0020 | 0.0158 | 0.9009 | 12.6699 | 0.7580 | 10.5901 |
| Stroke | order. Clostridiales. id. 1863       | Weighted median           | 19 | -0.1813 | 0.0843 | 0.0314 | -0.0020 | 0.0158 | 0.9009 | 12.6699 | 0.7580 | 10.5901 |
| Stroke | order. Clostridiales. id. 1863       | Inverse variance weighted | 19 | -0.0916 | 0.0621 | 0.1406 | -0.0020 | 0.0158 | 0.9009 | 12.6699 | 0.7580 | 10.5901 |
| Stroke | order. Clostridiales. id. 1863       | Simple mode               | 19 | -0.2304 | 0.1571 | 0.1596 | -0.0020 | 0.0158 | 0.9009 | 12.6699 | 0.7580 | 10.5901 |
| Stroke | order. Clostridiales. id. 1863       | Weighted mode             | 19 | -0.2336 | 0.1423 | 0.1179 | -0.0020 | 0.0158 | 0.9009 | 12.6699 | 0.7580 | 10.5901 |
| Stroke | order. Coriobacteriales. id. 810     | MR Egger                  | 19 | -0.0539 | 0.3028 | 0.8609 | 0.0029  | 0.0161 | 0.8609 | 13.3012 | 0.7158 | 15.7571 |
| Stroke | order. Coriobacteriales. id. 810     | Weighted median           | 19 | -0.0099 | 0.0881 | 0.9108 | 0.0029  | 0.0161 | 0.8609 | 13.3012 | 0.7158 | 15.7571 |
| Stroke | order. Coriobacteriales. id. 810     | Inverse variance weighted | 19 | -0.0012 | 0.0632 | 0.9851 | 0.0029  | 0.0161 | 0.8609 | 13.3012 | 0.7158 | 15.7571 |
| Stroke | order. Coriobacteriales. id. 810     | Simple mode               | 19 | -0.0370 | 0.1447 | 0.8013 | 0.0029  | 0.0161 | 0.8609 | 13.3012 | 0.7158 | 15.7571 |
| Stroke | order. Coriobacteriales. id. 810     | Weighted mode             | 19 | -0.0175 | 0.1307 | 0.8949 | 0.0029  | 0.0161 | 0.8609 | 13.3012 | 0.7158 | 15.7571 |
| Stroke | order. Desulfovibrionales. id. 3156  | MR Egger                  | 19 | -0.2925 | 0.3328 | 0.3916 | 0.0146  | 0.0177 | 0.4200 | 17.5014 | 0.4209 | 11.2539 |
| Stroke | order. Desulfovibrionales. id. 3156  | Weighted median           | 19 | -0.0824 | 0.0941 | 0.3810 | 0.0146  | 0.0177 | 0.4200 | 17.5014 | 0.4209 | 11.2539 |
| Stroke | order. Desulfovibrionales. id. 3156  | Inverse variance weighted | 19 | -0.0236 | 0.0687 | 0.7317 | 0.0146  | 0.0177 | 0.4200 | 17.5014 | 0.4209 | 11.2539 |
| Stroke | order. Desulfovibrionales. id. 3156  | Simple mode               | 19 | -0.1705 | 0.1937 | 0.3901 | 0.0146  | 0.0177 | 0.4200 | 17.5014 | 0.4209 | 11.2539 |
| Stroke | order. Desulfovibrionales. id. 3156  | Weighted mode             | 19 | -0.1858 | 0.1725 | 0.2956 | 0.0146  | 0.0177 | 0.4200 | 17.5014 | 0.4209 | 11.2539 |
| Stroke | order. Enterobacteriales. id. 3468   | MR Egger                  | 19 | -0.2164 | 0.3483 | 0.5427 | 0.0097  | 0.0185 | 0.6049 | 12.9010 | 0.7428 | 15.1316 |
| Stroke | order. Enterobacteriales. id. 3468   | Weighted median           | 19 | -0.0950 | 0.0974 | 0.3294 | 0.0097  | 0.0185 | 0.6049 | 12.9010 | 0.7428 | 15.1316 |
| Stroke | order. Enterobacteriales. id. 3468   | Inverse variance weighted | 19 | -0.0368 | 0.0725 | 0.6117 | 0.0097  | 0.0185 | 0.6049 | 12.9010 | 0.7428 | 15.1316 |
| Stroke | order. Enterobacteriales. id. 3468   | Simple mode               | 19 | -0.1347 | 0.1868 | 0.4802 | 0.0097  | 0.0185 | 0.6049 | 12.9010 | 0.7428 | 15.1316 |
| Stroke | order. Enterobacteriales. id. 3468   | Weighted mode             | 19 | -0.1532 | 0.1795 | 0.4047 | 0.0097  | 0.0185 | 0.6049 | 12.9010 | 0.7428 | 15.1316 |
| Stroke | order. Erysipelotrichales. id. 2148  | MR Egger                  | 19 | 0.0701  | 0.4255 | 0.8710 | -0.0023 | 0.0226 | 0.9194 | 34.4011 | 0.0074 | 7.3529  |
| Stroke | order. Erysipelotrichales. id. 2148  | Weighted median           | 19 | 0.0805  | 0.0963 | 0.4033 | -0.0023 | 0.0226 | 0.9194 | 34.4011 | 0.0074 | 7.3529  |
| Stroke | order. Erysipelotrichales. id. 2148  | Inverse variance weighted | 19 | 0.0274  | 0.0862 | 0.7506 | -0.0023 | 0.0226 | 0.9194 | 34.4011 | 0.0074 | 7.3529  |
| Stroke | order. Erysipelotrichales. id. 2148  | Simple mode               | 19 | 0.1713  | 0.2110 | 0.4273 | -0.0023 | 0.0226 | 0.9194 | 34.4011 | 0.0074 | 7.3529  |
| Stroke | order. Erysipelotrichales. id. 2148  | Weighted mode             | 19 | 0.1464  | 0.1811 | 0.4293 | -0.0023 | 0.0226 | 0.9194 | 34.4011 | 0.0074 | 7.3529  |
| Stroke | order. Gastranaerophilales. id. 1591 | MR Egger                  | 18 | -0.6645 | 0.5481 | 0.2429 | 0.0292  | 0.0289 | 0.3266 | 15.4817 | 0.5608 | 4.6775  |
| Stroke | order. Gastranaerophilales. id. 1591 | Weighted median           | 18 | -0.1529 | 0.1539 | 0.3207 | 0.0292  | 0.0289 | 0.3266 | 15.4817 | 0.5608 | 4.6775  |
| Stroke | order. Gastranaerophilales. id. 1591 | Inverse variance weighted | 18 | -0.1211 | 0.1098 | 0.2700 | 0.0292  | 0.0289 | 0.3266 | 15.4817 | 0.5608 | 4.6775  |
| Stroke | order. Gastranaerophilales. id. 1591 | Simple mode               | 18 | 0.3499  | 0.2973 | 0.2555 | 0.0292  | 0.0289 | 0.3266 | 15.4817 | 0.5608 | 4.6775  |
| Stroke | order. Gastranaerophilales. id. 1591 | Weighted mode             | 18 | -0.3652 | 0.2712 | 0.1958 | 0.0292  | 0.0289 | 0.3266 | 15.4817 | 0.5608 | 4.6775  |
| Stroke | order. Lactobacillales. id. 1800     | MR Egger                  | 19 | 0.3154  | 0.3074 | 0.3193 | -0.0200 | 0.0163 | 0.2368 | 15.8864 | 0.6005 | 12.7985 |
| Stroke | order. Lactobacillales. id. 1800     | Weighted median           | 19 | -0.1174 | 0.0928 | 0.2062 | -0.0200 | 0.0163 | 0.2368 | 15.8864 | 0.6005 | 12.7985 |
| Stroke | order. Lactobacillales. id. 1800     | Inverse variance weighted | 19 | -0.0534 | 0.0640 | 0.4041 | -0.0200 | 0.0163 | 0.2368 | 15.8864 | 0.6005 | 12.7985 |
| Stroke | order. Lactobacillales. id. 1800     | Simple mode               | 19 | -0.2179 | 0.1651 | 0.2033 | -0.0200 | 0.0163 | 0.2368 | 15.8864 | 0.6005 | 12.7985 |
| Stroke | order. Lactobacillales. id. 1800     | Weighted mode             | 19 | -0.1704 | 0.1458 | 0.2580 | -0.0200 | 0.0163 | 0.2368 | 15.8864 | 0.6005 | 12.7985 |
| Stroke | order. Methanobacteriales. id. 120   | MR Egger                  | 18 | 1.0529  | 0.6950 | 0.1493 | -0.0555 | 0.0366 | 0.1487 | 9.5238  | 0.9224 | 5.6058  |
| Stroke | order. Methanobacteriales. id. 120   | Weighted median           | 18 | 0.0345  | 0.1934 | 0.8584 | -0.0555 | 0.0366 | 0.1487 | 9.5238  | 0.9224 | 5.6058  |
| Stroke | order. Methanobacteriales. id. 120   | Inverse variance weighted | 18 | 0.0194  | 0.1386 | 0.8885 | -0.0555 | 0.0366 | 0.1487 | 9.5238  | 0.9224 | 5.6058  |
| Stroke | order. Methanobacteriales. id. 120   | Simple mode               | 18 | 0.0956  | 0.3290 | 0.7750 | -0.0555 | 0.0366 | 0.1487 | 9.5238  | 0.9224 | 5.6058  |
| Stroke | order. Methanobacteriales. id. 120   | Weighted mode             | 18 | 0.0836  | 0.2716 | 0.7621 | -0.0555 | 0.0366 | 0.1487 | 9.5238  | 0.9224 | 5.6058  |
| Stroke | order. MollicutesRF9. id. 11579      | MR Egger                  | 19 | 0.0712  | 0.3984 | 0.8603 | -0.0050 | 0.0211 | 0.8146 | 16.6191 | 0.4804 | 8.5205  |
| Stroke | order. MollicutesRF9. id. 11579      | Weighted median           | 19 | -0.0394 | 0.1156 | 0.7333 | -0.0050 | 0.0211 | 0.8146 | 16.6191 | 0.4804 | 8.5205  |
| Stroke | order. MollicutesRF9. id. 11579      | Inverse variance weighted | 19 | -0.0216 | 0.0825 | 0.7931 | -0.0050 | 0.0211 | 0.8146 | 16.6191 | 0.4804 | 8.5205  |
| Stroke | order. MollicutesRF9. id. 11579      | Simple mode               | 19 | 0.0373  | 0.2121 | 0.8624 | -0.0050 | 0.0211 | 0.8146 | 16.6191 | 0.4804 | 8.5205  |
| Stroke | order. MollicutesRF9. id. 11579      | Weighted mode             | 19 | -0.0153 | 0.2129 | 0.9435 | -0.0050 | 0.0211 | 0.8146 | 16.6191 | 0.4804 | 8.5205  |
| Stroke | order. NBIn. id. 3953                | MR Egger                  | 18 | -1.1332 | 0.8362 | 0.1942 | 0.0593  | 0.0441 | 0.1969 | 36.5050 | 0.0039 | 2.5156  |
| Stroke | order. NBIn. id. 3953                | Weighted median           | 18 | -0.0596 | 0.1753 | 0.7338 | 0.0593  | 0.0441 | 0.1969 | 36.5050 | 0.0039 | 2.5156  |
| Stroke | order. NBIn. id. 3953                | Inverse variance weighted | 18 | -0.0302 | 0.1717 | 0.8604 | 0.0593  | 0.0441 | 0.1969 | 36.5050 | 0.0039 | 2.5156  |
| Stroke | order. NBIn. id. 3953                | Simple mode               | 18 | -0.0522 | 0.3113 | 0.8687 | 0.0593  | 0.0441 | 0.1969 | 36.5050 | 0.0039 | 2.5156  |
| Stroke | order. NBIn. id. 3953                | Weighted mode             | 18 | -0.0785 | 0.2727 | 0.7769 | 0.0593  | 0.0441 | 0.1969 | 36.5050 | 0.0039 | 2.5156  |
| Stroke | order. Pasteurellales. id. 3688      | MR Egger                  | 19 | 0.8233  | 0.4173 | 0.0650 | -0.0415 | 0.0222 | 0.0786 | 14.7962 | 0.6759 | 11.6549 |
| Stroke | order. Pasteurellales. id. 3688      | Weighted median           | 19 | 0.1160  | 0.1160 | 0.3173 | -0.0415 | 0.0222 | 0.0786 | 14.7962 | 0.6759 | 11.6549 |

|        |                                     |                           |    |         |        |        |         |        |        |         |        |         |
|--------|-------------------------------------|---------------------------|----|---------|--------|--------|---------|--------|--------|---------|--------|---------|
| Stroke | order. Pasteurellales. id. 3688     | Inverse variance weighted | 19 | 0.0596  | 0.0870 | 0.4938 | -0.0415 | 0.0222 | 0.0786 | 14.7962 | 0.6759 | 11.6549 |
| Stroke | order. Pasteurellales. id. 3688     | Simple mode               | 19 | 0.0561  | 0.1963 | 0.7783 | -0.0415 | 0.0222 | 0.0786 | 14.7962 | 0.6759 | 11.6549 |
| Stroke | order. Pasteurellales. id. 3688     | Weighted mode             | 19 | 0.0326  | 0.1838 | 0.8614 | -0.0415 | 0.0222 | 0.0786 | 14.7962 | 0.6759 | 11.6549 |
| Stroke | order. Rhodospirillales. id. 2667   | MR Egger                  | 18 | -0.1551 | 0.4517 | 0.7359 | 0.0073  | 0.0238 | 0.7616 | 9.3100  | 0.9001 | 13.3130 |
| Stroke | order. Rhodospirillales. id. 2667   | Weighted median           | 18 | 0.0362  | 0.1215 | 0.7656 | 0.0073  | 0.0238 | 0.7616 | 9.3100  | 0.9001 | 13.3130 |
| Stroke | order. Rhodospirillales. id. 2667   | Inverse variance weighted | 18 | -0.0185 | 0.0907 | 0.8383 | 0.0073  | 0.0238 | 0.7616 | 9.3100  | 0.9001 | 13.3130 |
| Stroke | order. Rhodospirillales. id. 2667   | Simple mode               | 18 | 0.0506  | 0.2255 | 0.8251 | 0.0073  | 0.0238 | 0.7616 | 9.3100  | 0.9001 | 13.3130 |
| Stroke | order. Rhodospirillales. id. 2667   | Weighted mode             | 18 | 0.0506  | 0.2415 | 0.8365 | 0.0073  | 0.0238 | 0.7616 | 9.3100  | 0.9001 | 13.3130 |
| Stroke | order. Selenomonadales. id. 2165    | MR Egger                  | 19 | -0.1691 | 0.2995 | 0.5797 | 0.0081  | 0.0159 | 0.6178 | 9.5984  | 0.9196 | 19.0638 |
| Stroke | order. Selenomonadales. id. 2165    | Weighted median           | 19 | -0.0458 | 0.0844 | 0.5878 | 0.0081  | 0.0159 | 0.6178 | 9.5984  | 0.9196 | 19.0638 |
| Stroke | order. Selenomonadales. id. 2165    | Inverse variance weighted | 19 | -0.0202 | 0.0624 | 0.7459 | 0.0081  | 0.0159 | 0.6178 | 9.5984  | 0.9196 | 19.0638 |
| Stroke | order. Selenomonadales. id. 2165    | Simple mode               | 19 | -0.0389 | 0.1421 | 0.7871 | 0.0081  | 0.0159 | 0.6178 | 9.5984  | 0.9196 | 19.0638 |
| Stroke | order. Selenomonadales. id. 2165    | Weighted mode             | 19 | -0.0782 | 0.1330 | 0.5637 | 0.0081  | 0.0159 | 0.6178 | 9.5984  | 0.9196 | 19.0638 |
| Stroke | order. Verrucomicrobiales. id. 4030 | MR Egger                  | 19 | -0.0223 | 0.3853 | 0.9545 | 0.0053  | 0.0204 | 0.7974 | 18.6035 | 0.3518 | 7.2587  |
| Stroke | order. Verrucomicrobiales. id. 4030 | Weighted median           | 19 | 0.0510  | 0.1103 | 0.6435 | 0.0053  | 0.0204 | 0.7974 | 18.6035 | 0.3518 | 7.2587  |
| Stroke | order. Verrucomicrobiales. id. 4030 | Inverse variance weighted | 19 | 0.0759  | 0.0782 | 0.3313 | 0.0053  | 0.0204 | 0.7974 | 18.6035 | 0.3518 | 7.2587  |
| Stroke | order. Verrucomicrobiales. id. 4030 | Simple mode               | 19 | 0.2090  | 0.1991 | 0.3077 | 0.0053  | 0.0204 | 0.7974 | 18.6035 | 0.3518 | 7.2587  |
| Stroke | order. Verrucomicrobiales. id. 4030 | Weighted mode             | 19 | 0.0802  | 0.1661 | 0.6350 | 0.0053  | 0.0204 | 0.7974 | 18.6035 | 0.3518 | 7.2587  |
| Stroke | order. Victivallales. id. 2254      | MR Egger                  | 18 | -0.1776 | 0.7871 | 0.8243 | 0.0013  | 0.0415 | 0.9763 | 26.5213 | 0.0471 | 2.6082  |
| Stroke | order. Victivallales. id. 2254      | Weighted median           | 18 | -0.1277 | 0.1752 | 0.4662 | 0.0013  | 0.0415 | 0.9763 | 26.5213 | 0.0471 | 2.6082  |
| Stroke | order. Victivallales. id. 2254      | Inverse variance weighted | 18 | -0.1544 | 0.1531 | 0.3135 | 0.0013  | 0.0415 | 0.9763 | 26.5213 | 0.0471 | 2.6082  |
| Stroke | order. Victivallales. id. 2254      | Simple mode               | 18 | -0.3864 | 0.3568 | 0.2939 | 0.0013  | 0.0415 | 0.9763 | 26.5213 | 0.0471 | 2.6082  |
| Stroke | order. Victivallales. id. 2254      | Weighted mode             | 18 | -0.2116 | 0.2949 | 0.4828 | 0.0013  | 0.0415 | 0.9763 | 26.5213 | 0.0471 | 2.6082  |
| Stroke | phylum. Actinobacteria. id. 400     | MR Egger                  | 19 | 0.1551  | 0.3557 | 0.6682 | -0.0097 | 0.0189 | 0.6150 | 23.8207 | 0.1244 | 8.7963  |
| Stroke | phylum. Actinobacteria. id. 400     | Weighted median           | 19 | 0.0263  | 0.0885 | 0.7666 | -0.0097 | 0.0189 | 0.6150 | 23.8207 | 0.1244 | 8.7963  |
| Stroke | phylum. Actinobacteria. id. 400     | Inverse variance weighted | 19 | -0.0231 | 0.0727 | 0.7508 | -0.0097 | 0.0189 | 0.6150 | 23.8207 | 0.1244 | 8.7963  |
| Stroke | phylum. Actinobacteria. id. 400     | Simple mode               | 19 | -0.2279 | 0.1663 | 0.1874 | -0.0097 | 0.0189 | 0.6150 | 23.8207 | 0.1244 | 8.7963  |
| Stroke | phylum. Actinobacteria. id. 400     | Weighted mode             | 19 | 0.0445  | 0.1418 | 0.7570 | -0.0097 | 0.0189 | 0.6150 | 23.8207 | 0.1244 | 8.7963  |
| Stroke | phylum. Bacteroidetes. id. 905      | MR Egger                  | 19 | 0.2112  | 0.3219 | 0.5205 | -0.0066 | 0.0171 | 0.7042 | 19.8072 | 0.2842 | 9.0074  |
| Stroke | phylum. Bacteroidetes. id. 905      | Weighted median           | 19 | 0.0975  | 0.0860 | 0.2573 | -0.0066 | 0.0171 | 0.7042 | 19.8072 | 0.2842 | 9.0074  |
| Stroke | phylum. Bacteroidetes. id. 905      | Inverse variance weighted | 19 | 0.0897  | 0.0655 | 0.1708 | -0.0066 | 0.0171 | 0.7042 | 19.8072 | 0.2842 | 9.0074  |
| Stroke | phylum. Bacteroidetes. id. 905      | Simple mode               | 19 | 0.0115  | 0.1501 | 0.9395 | -0.0066 | 0.0171 | 0.7042 | 19.8072 | 0.2842 | 9.0074  |
| Stroke | phylum. Bacteroidetes. id. 905      | Weighted mode             | 19 | 0.0115  | 0.1520 | 0.9403 | -0.0066 | 0.0171 | 0.7042 | 19.8072 | 0.2842 | 9.0074  |
| Stroke | phylum. Cyanobacteria. id. 1500     | MR Egger                  | 18 | -0.9403 | 0.4990 | 0.0778 | 0.0431  | 0.0263 | 0.1209 | 17.8704 | 0.3971 | 5.3353  |
| Stroke | phylum. Cyanobacteria. id. 1500     | Weighted median           | 18 | -0.0902 | 0.1450 | 0.5340 | 0.0431  | 0.0263 | 0.1209 | 17.8704 | 0.3971 | 5.3353  |
| Stroke | phylum. Cyanobacteria. id. 1500     | Inverse variance weighted | 18 | -0.1395 | 0.1026 | 0.1736 | 0.0431  | 0.0263 | 0.1209 | 17.8704 | 0.3971 | 5.3353  |
| Stroke | phylum. Cyanobacteria. id. 1500     | Simple mode               | 18 | 0.0914  | 0.2892 | 0.7557 | 0.0431  | 0.0263 | 0.1209 | 17.8704 | 0.3971 | 5.3353  |
| Stroke | phylum. Cyanobacteria. id. 1500     | Weighted mode             | 18 | 0.1075  | 0.2876 | 0.7131 | 0.0431  | 0.0263 | 0.1209 | 17.8704 | 0.3971 | 5.3353  |
| Stroke | phylum. Euryarchaeota. id. 55       | MR Egger                  | 18 | 0.9658  | 0.6800 | 0.1747 | -0.0505 | 0.0358 | 0.1783 | 12.0718 | 0.7958 | 4.4549  |
| Stroke | phylum. Euryarchaeota. id. 55       | Weighted median           | 18 | 0.0493  | 0.1874 | 0.7927 | -0.0505 | 0.0358 | 0.1783 | 12.0718 | 0.7958 | 4.4549  |
| Stroke | phylum. Euryarchaeota. id. 55       | Inverse variance weighted | 18 | 0.0278  | 0.1358 | 0.8377 | -0.0505 | 0.0358 | 0.1783 | 12.0718 | 0.7958 | 4.4549  |
| Stroke | phylum. Euryarchaeota. id. 55       | Simple mode               | 18 | 0.0726  | 0.3265 | 0.8267 | -0.0505 | 0.0358 | 0.1783 | 12.0718 | 0.7958 | 4.4549  |
| Stroke | phylum. Euryarchaeota. id. 55       | Weighted mode             | 18 | 0.0660  | 0.2871 | 0.8210 | -0.0505 | 0.0358 | 0.1783 | 12.0718 | 0.7958 | 4.4549  |
| Stroke | phylum. Firmicutes. id. 1672        | MR Egger                  | 19 | -0.0427 | 0.2982 | 0.8878 | -0.0039 | 0.0158 | 0.8079 | 15.2484 | 0.5776 | 8.9022  |
| Stroke | phylum. Firmicutes. id. 1672        | Weighted median           | 19 | -0.1449 | 0.0844 | 0.0861 | -0.0039 | 0.0158 | 0.8079 | 15.2484 | 0.5776 | 8.9022  |
| Stroke | phylum. Firmicutes. id. 1672        | Inverse variance weighted | 19 | -0.1148 | 0.0621 | 0.0648 | -0.0039 | 0.0158 | 0.8079 | 15.2484 | 0.5776 | 8.9022  |
| Stroke | phylum. Firmicutes. id. 1672        | Simple mode               | 19 | -0.1926 | 0.1438 | 0.1972 | -0.0039 | 0.0158 | 0.8079 | 15.2484 | 0.5776 | 8.9022  |
| Stroke | phylum. Firmicutes. id. 1672        | Weighted mode             | 19 | -0.1852 | 0.1369 | 0.1927 | -0.0039 | 0.0158 | 0.8079 | 15.2484 | 0.5776 | 8.9022  |
| Stroke | phylum. Lentisphaerae. id. 2238     | MR Egger                  | 18 | -0.0909 | 0.7794 | 0.9086 | -0.0040 | 0.0411 | 0.9233 | 26.0296 | 0.0536 | 2.6028  |
| Stroke | phylum. Lentisphaerae. id. 2238     | Weighted median           | 18 | -0.1493 | 0.1811 | 0.4096 | -0.0040 | 0.0411 | 0.9233 | 26.0296 | 0.0536 | 2.6028  |
| Stroke | phylum. Lentisphaerae. id. 2238     | Inverse variance weighted | 18 | -0.1656 | 0.1517 | 0.2750 | -0.0040 | 0.0411 | 0.9233 | 26.0296 | 0.0536 | 2.6028  |
| Stroke | phylum. Lentisphaerae. id. 2238     | Simple mode               | 18 | -0.4215 | 0.3346 | 0.2247 | -0.0040 | 0.0411 | 0.9233 | 26.0296 | 0.0536 | 2.6028  |
| Stroke | phylum. Lentisphaerae. id. 2238     | Weighted mode             | 18 | -0.2725 | 0.3033 | 0.3815 | -0.0040 | 0.0411 | 0.9233 | 26.0296 | 0.0536 | 2.6028  |
| Stroke | phylum. Proteobacteria. id. 2375    | MR Egger                  | 19 | -0.5242 | 0.2989 | 0.0974 | 0.0273  | 0.0159 | 0.1032 | 19.8554 | 0.3410 | 11.2781 |
| Stroke | phylum. Proteobacteria. id. 2375    | Weighted median           | 19 | 0.0590  | 0.0915 | 0.5189 | 0.0273  | 0.0159 | 0.1032 | 19.8554 | 0.3410 | 11.2781 |
| Stroke | phylum. Proteobacteria. id. 2375    | Inverse variance weighted | 19 | -0.0209 | 0.0654 | 0.7496 | 0.0273  | 0.0159 | 0.1032 | 19.8554 | 0.3410 | 11.2781 |
| Stroke | phylum. Proteobacteria. id. 2375    | Simple mode               | 19 | 0.1641  | 0.1840 | 0.3842 | 0.0273  | 0.0159 | 0.1032 | 19.8554 | 0.3410 | 11.2781 |
| Stroke | phylum. Proteobacteria. id. 2375    | Weighted mode             | 19 | 0.1853  | 0.2101 | 0.3894 | 0.0273  | 0.0159 | 0.1032 | 19.8554 | 0.3410 | 11.2781 |

|                   |                                         |                           |    |         |        |        |        |        |        |         |        |         |
|-------------------|-----------------------------------------|---------------------------|----|---------|--------|--------|--------|--------|--------|---------|--------|---------|
| Stroke            | phylum.Tenericutes.id.3919              | MR Egger                  | 19 | -0.1040 | 0.4100 | 0.8027 | 0.0012 | 0.0217 | 0.9555 | 19.8538 | 0.2818 | 7.2889  |
| Stroke            | phylum.Tenericutes.id.3919              | Weighted median           | 19 | -0.0396 | 0.1087 | 0.7156 | 0.0012 | 0.0217 | 0.9555 | 19.8538 | 0.2818 | 7.2889  |
| Stroke            | phylum.Tenericutes.id.3919              | Inverse variance weighted | 19 | -0.0813 | 0.0825 | 0.3244 | 0.0012 | 0.0217 | 0.9555 | 19.8538 | 0.2818 | 7.2889  |
| Stroke            | phylum.Tenericutes.id.3919              | Simple mode               | 19 | -0.0528 | 0.2042 | 0.7988 | 0.0012 | 0.0217 | 0.9555 | 19.8538 | 0.2818 | 7.2889  |
| Stroke            | phylum.Tenericutes.id.3919              | Weighted mode             | 19 | -0.0483 | 0.1983 | 0.8105 | 0.0012 | 0.0217 | 0.9555 | 19.8538 | 0.2818 | 7.2889  |
| Stroke            | phylum.Verrucomicrobia.id.3982          | MR Egger                  | 19 | 0.0362  | 0.3608 | 0.9213 | 0.0007 | 0.0191 | 0.9722 | 12.6050 | 0.7622 | 10.3433 |
| Stroke            | phylum.Verrucomicrobia.id.3982          | Weighted median           | 19 | 0.1256  | 0.1017 | 0.2169 | 0.0007 | 0.0191 | 0.9722 | 12.6050 | 0.7622 | 10.3433 |
| Stroke            | phylum.Verrucomicrobia.id.3982          | Inverse variance weighted | 19 | 0.0487  | 0.0751 | 0.5173 | 0.0007 | 0.0191 | 0.9722 | 12.6050 | 0.7622 | 10.3433 |
| Stroke            | phylum.Verrucomicrobia.id.3982          | Simple mode               | 19 | 0.2197  | 0.1963 | 0.2779 | 0.0007 | 0.0191 | 0.9722 | 12.6050 | 0.7622 | 10.3433 |
| Stroke            | phylum.Verrucomicrobia.id.3982          | Weighted mode             | 19 | 0.1901  | 0.1802 | 0.3054 | 0.0007 | 0.0191 | 0.9722 | 12.6050 | 0.7622 | 10.3433 |
| LargeArteryStroke | class.Methanobacteria.id.119            | Wald ratio                | 1  | -0.4207 | 0.1803 | 0.0196 | NA     | NA     | NA     | NA      | NA     | NA      |
| LargeArteryStroke | family.FamilyXI.id.1936                 | Wald ratio                | 1  | -0.4749 | 0.1909 | 0.0129 | NA     | NA     | NA     | NA      | NA     | NA      |
| LargeArteryStroke | family.Methanobacteriaceae.id.121       | Wald ratio                | 1  | -0.4207 | 0.1803 | 0.0196 | NA     | NA     | NA     | NA      | NA     | NA      |
| LargeArteryStroke | genus.Methanobrevibacter.id.123         | Wald ratio                | 1  | -0.3536 | 0.1833 | 0.0537 | NA     | NA     | NA     | NA      | NA     | NA      |
| LargeArteryStroke | genus.RikenellaceaeRC9gutgroup.id.11191 | Wald ratio                | 1  | -0.1726 | 0.1947 | 0.3755 | NA     | NA     | NA     | NA      | NA     | NA      |
| LargeArteryStroke | genus.Sellimonas.id.14369               | Wald ratio                | 1  | 0.0567  | 0.1953 | 0.7715 | NA     | NA     | NA     | NA      | NA     | NA      |
| LargeArteryStroke | genus.Victivallis.id.2256               | Wald ratio                | 1  | 0.3705  | 0.1911 | 0.0526 | NA     | NA     | NA     | NA      | NA     | NA      |
| LargeArteryStroke | order.Bacillales.id.1674                | Wald ratio                | 1  | -0.2423 | 0.1968 | 0.2183 | NA     | NA     | NA     | NA      | NA     | NA      |
| LargeArteryStroke | order.Methanobacteriales.id.120         | Wald ratio                | 1  | -0.4207 | 0.1803 | 0.0196 | NA     | NA     | NA     | NA      | NA     | NA      |
| SmallVesselStroke | family.FamilyXI.id.1936                 | Wald ratio                | 1  | -0.2270 | 0.2487 | 0.3615 | NA     | NA     | NA     | NA      | NA     | NA      |
| SmallVesselStroke | order.Bacillales.id.1674                | Wald ratio                | 1  | 0.1505  | 0.2541 | 0.5539 | NA     | NA     | NA     | NA      | NA     | NA      |
